# Supplementary material for: SIRT2 functions as a histone delactylase and inhibits the proliferation and migration of neuroblastoma cells
Source: PubMed Central journal article supplement (PMC9174446; doi:10.1038/s41421-022-00398-y), 2022-06-07
Supplement: 41421_2022_398_MOESM5_ESM.pdf [file 41421_2022_398_MOESM5_ESM.pdf]

**Table S5. ChIP-seq peaks and annotated genes by anti-H4K8la antibody in SIRT2 KD SH-SY5Y cells.**

| chr | start   | end     | peakid             | -LOG(pvalue) | gene                                                                                                           |
|-----|---------|---------|--------------------|--------------|----------------------------------------------------------------------------------------------------------------|
| 1   | 714361  | 714601  | KD2-H4K8la_peak_1  | 9.0413       | RP11-206L10.2_ENSG00000228327;RP11-206L10.9_ENSG00000237491                                                    |
| 1   | 877517  | 878123  | KD2-H4K8la_peak_2  | 9.07903      |                                                                                                                |
| 1   | 879156  | 879425  | KD2-H4K8la_peak_3  | 8.66402      |                                                                                                                |
| 1   | 896086  | 896475  | KD2-H4K8la_peak_4  | 7.10162      | KLHL17_ENSG00000187961                                                                                         |
| 1   | 941579  | 941786  | KD2-H4K8la_peak_5  | 6.38565      |                                                                                                                |
| 1   | 1016386 | 1016644 | KD2-H4K8la_peak_6  | 8.15906      |                                                                                                                |
| 1   | 1080163 | 1080478 | KD2-H4K8la_peak_7  | 6.86458      |                                                                                                                |
| 1   | 1093099 | 1093385 | KD2-H4K8la_peak_8  | 6.86458      |                                                                                                                |
| 1   | 1167795 | 1168113 | KD2-H4K8la_peak_9  | 6.68593      | SDF4_ENSG00000078808;B3GALT6_ENSG00000176022                                                                   |
| 1   | 1209460 | 1209938 | KD2-H4K8la_peak_10 | 8.56099      | UBE2J2_ENSG00000160087;RP5-902P8.10_ENSG00000230415                                                            |
| 1   | 1240711 | 1241271 | KD2-H4K8la_peak_11 | 8.11415      |                                                                                                                |
| 1   | 1259674 | 1259933 | KD2-H4K8la_peak_12 | 7.12014      | CPSF3L_ENSG00000127054                                                                                         |
| 1   | 1295507 | 1295739 | KD2-H4K8la_peak_13 | 8.0333       |                                                                                                                |
| 1   | 1310302 | 1310505 | KD2-H4K8la_peak_14 | 8.3574       | AURKAIP1_ENSG00000175756                                                                                       |
| 1   | 1311090 | 1311775 | KD2-H4K8la_peak_15 | 12.07084     | AURKAIP1_ENSG00000175756                                                                                       |
| 1   | 1334321 | 1334624 | KD2-H4K8la_peak_16 | 9.76928      | CCNL2_ENSG00000221978;RP4-758J18.2_ENSG00000224870                                                             |
| 1   | 1355719 | 1355946 | KD2-H4K8la_peak_17 | 9.61894      | RP4-758J18.7_ENSG00000225905                                                                                   |
| 1   | 1363001 | 1363271 | KD2-H4K8la_peak_18 | 6.98292      |                                                                                                                |
| 1   | 1365895 | 1366255 | KD2-H4K8la_peak_19 | 5.00908      |                                                                                                                |
| 1   | 1397530 | 1397769 | KD2-H4K8la_peak_20 | 8.84474      |                                                                                                                |
| 1   | 1398042 | 1398358 | KD2-H4K8la_peak_21 | 5.84082      |                                                                                                                |
| 1   | 1510516 | 1510894 | KD2-H4K8la_peak_22 | 10.5885      | SSU72_ENSG00000160075;AL645728.1_ENSG00000215014                                                               |
| 1   | 1550887 | 1551114 | KD2-H4K8la_peak_23 | 14.7348      | RP11-345P4.9_ENSG00000272106;MIB2_ENSG00000197530                                                              |
| 1   | 1821986 | 1822414 | KD2-H4K8la_peak_24 | 11.52764     | GNB1_ENSG00000078369;RP1-140A9.1_ENSG00000231050                                                               |
| 1   | 1875000 | 1875488 | KD2-H4K8la_peak_25 | 6.3399       |                                                                                                                |
| 1   | 1976079 | 1976378 | KD2-H4K8la_peak_26 | 13.37883     |                                                                                                                |
| 1   | 2126372 | 2126660 | KD2-H4K8la_peak_27 | 5.02488      |                                                                                                                |
| 1   | 2137048 | 2137286 | KD2-H4K8la_peak_28 | 6.1189       |                                                                                                                |
| 1   | 2143700 | 2143955 | KD2-H4K8la_peak_29 | 9.18682      | C1orf86_ENSG00000162585;RP11-181G12.5_ENSG00000243558;RP11-181G12.4_ENSG00000234396                            |
| 1   | 2144200 | 2144759 | KD2-H4K8la_peak_30 | 9.37576      | C1orf86_ENSG00000162585;RP11-181G12.5_ENSG00000243558;RP11-181G12.4_ENSG00000234396;AL590822.1_ENSG00000203301 |
| 1   | 2245943 | 2246267 | KD2-H4K8la_peak_31 | 13.27512     |                                                                                                                |
| 1   | 2246839 | 2247316 | KD2-H4K8la_peak_32 | 9.05604      |                                                                                                                |
| 1   | 2405681 | 2406352 | KD2-H4K8la_peak_33 | 12.32641     |                                                                                                                |
| 1   | 2406638 | 2407052 | KD2-H4K8la_peak_34 | 7.92775      |                                                                                                                |
| 1   | 2413729 | 2414239 | KD2-H4K8la_peak_35 | 8.16787      |                                                                                                                |
| 1   | 2475848 | 2476274 | KD2-H4K8la_peak_36 | 9.61894      |                                                                                                                |
| 1   | 2574092 | 2574590 | KD2-H4K8la_peak_37 | 15.75739     |                                                                                                                |
| 1   | 3086723 | 3087073 | KD2-H4K8la_peak_38 | 8.76082      |                                                                                                                |
| 1   | 3433097 | 3433467 | KD2-H4K8la_peak_39 | 5.89088      |                                                                                                                |
| 1   | 3447560 | 3447758 | KD2-H4K8la_peak_40 | 5.3107       |                                                                                                                |
| 1   | 3566200 | 3566494 | KD2-H4K8la_peak_41 | 9.27415      |                                                                                                                |
| 1   | 3568220 | 3568880 | KD2-H4K8la_peak_42 | 12.83096     | WRAP73_ENSG00000116213;TP73_ENSG00000078900                                                                    |
| 1   | 3712630 | 3712838 | KD2-H4K8la_peak_43 | 7.92775      | LRRC47_ENSG00000130764                                                                                         |
| 1   | 6260289 | 6260644 | KD2-H4K8la_peak_44 | 9.27415      |                                                                                                                |

|   |         |         |                    |          |                                                                                |
|---|---------|---------|--------------------|----------|--------------------------------------------------------------------------------|
| 1 | 6550773 | 6551055 | KD2-H4K8la_peak_45 | 6.47589  |                                                                                |
| 1 | 6761410 | 6761785 | KD2-H4K8la_peak_46 | 7.41831  | DNAJC11_ENSG00000007923                                                        |
| 1 | 6762314 | 6762532 | KD2-H4K8la_peak_47 | 6.04152  | DNAJC11_ENSG00000007923                                                        |
| 1 | 7401241 | 7401441 | KD2-H4K8la_peak_48 | 8.72694  |                                                                                |
| 1 | 7537757 | 7538101 | KD2-H4K8la_peak_49 | 8.37064  |                                                                                |
| 1 | 7594527 | 7594818 | KD2-H4K8la_peak_50 | 7.49467  |                                                                                |
| 1 | 7616557 | 7616828 | KD2-H4K8la_peak_51 | 7.92775  |                                                                                |
| 1 | 7618519 | 7618768 | KD2-H4K8la_peak_52 | 6.20477  |                                                                                |
| 1 | 7646615 | 7647003 | KD2-H4K8la_peak_53 | 10.43707 |                                                                                |
| 1 | 7727953 | 7728183 | KD2-H4K8la_peak_54 | 9.99681  |                                                                                |
| 1 | 7729021 | 7729479 | KD2-H4K8la_peak_55 | 5.79108  |                                                                                |
| 1 | 7740494 | 7740724 | KD2-H4K8la_peak_56 | 6.04899  |                                                                                |
| 1 | 7740965 | 7741421 | KD2-H4K8la_peak_57 | 10.59328 |                                                                                |
| 1 | 8086622 | 8087392 | KD2-H4K8la_peak_58 | 14.15376 | ERRFII_ENSG00000116285;RP11-431K24.1_ENSG00000238290                           |
| 1 | 8230277 | 8230523 | KD2-H4K8la_peak_59 | 7.56395  |                                                                                |
| 1 | 8378177 | 8378728 | KD2-H4K8la_peak_60 | 13.26459 | SLC45A1_ENSG00000162426                                                        |
| 1 | 9488324 | 9488764 | KD2-H4K8la_peak_61 | 6.96161  |                                                                                |
| 1 | 9554963 | 9555356 | KD2-H4K8la_peak_62 | 8.12466  |                                                                                |
| 1 | 9663619 | 9663873 | KD2-H4K8la_peak_63 | 4.68264  |                                                                                |
| 1 | 9884400 | 9884867 | KD2-H4K8la_peak_64 | 6.13507  | CLSTN1_ENSG00000171603                                                         |
| 1 | 1.1E+07 | 1.1E+07 | KD2-H4K8la_peak_65 | 6.38565  |                                                                                |
| 1 | 1.1E+07 | 1.1E+07 | KD2-H4K8la_peak_66 | 8.76116  |                                                                                |
| 1 | 1.1E+07 | 1.1E+07 | KD2-H4K8la_peak_67 | 5.58883  |                                                                                |
| 1 | 1.1E+07 | 1.1E+07 | KD2-H4K8la_peak_68 | 9.20163  |                                                                                |
| 1 | 1.1E+07 | 1.1E+07 | KD2-H4K8la_peak_69 | 7.97806  |                                                                                |
| 1 | 1.1E+07 | 1.1E+07 | KD2-H4K8la_peak_70 | 11.87032 |                                                                                |
| 1 | 1.1E+07 | 1.1E+07 | KD2-H4K8la_peak_71 | 12.13455 |                                                                                |
| 1 | 1.1E+07 | 1.1E+07 | KD2-H4K8la_peak_72 | 5.67596  |                                                                                |
| 1 | 1.1E+07 | 1.1E+07 | KD2-H4K8la_peak_73 | 9.27415  |                                                                                |
| 1 | 1.1E+07 | 1.1E+07 | KD2-H4K8la_peak_74 | 9.61894  |                                                                                |
| 1 | 1.1E+07 | 1.1E+07 | KD2-H4K8la_peak_75 | 7.49467  | EXOSC10_ENSG00000171824;RP4-635E18.6_ENSG00000230337                           |
| 1 | 1.1E+07 | 1.1E+07 | KD2-H4K8la_peak_76 | 9.38376  | EXOSC10_ENSG00000171824;RP4-635E18.6_ENSG00000230337                           |
| 1 | 1.1E+07 | 1.1E+07 | KD2-H4K8la_peak_77 | 12.1221  | UBIAD1_ENSG00000120942                                                         |
| 1 | 1.1E+07 | 1.1E+07 | KD2-H4K8la_peak_78 | 7.22716  |                                                                                |
| 1 | 1.2E+07 | 1.2E+07 | KD2-H4K8la_peak_79 | 6.13507  | FBXO6_ENSG00000116663                                                          |
| 1 | 1.2E+07 | 1.2E+07 | KD2-H4K8la_peak_80 | 6.13507  |                                                                                |
| 1 | 1.2E+07 | 1.2E+07 | KD2-H4K8la_peak_81 | 9.66714  |                                                                                |
| 1 | 1.2E+07 | 1.2E+07 | KD2-H4K8la_peak_82 | 16.21274 |                                                                                |
| 1 | 1.4E+07 | 1.4E+07 | KD2-H4K8la_peak_83 | 10.20357 | PRDM2_ENSG00000116731                                                          |
| 1 | 1.5E+07 | 1.5E+07 | KD2-H4K8la_peak_84 | 7.61975  |                                                                                |
| 1 | 1.6E+07 | 1.6E+07 | KD2-H4K8la_peak_85 | 6.64804  |                                                                                |
| 1 | 1.6E+07 | 1.6E+07 | KD2-H4K8la_peak_86 | 10.04111 |                                                                                |
| 1 | 1.6E+07 | 1.6E+07 | KD2-H4K8la_peak_87 | 12.97817 | RP4-680D5.9_ENSG00000271742;PLEKHM2_ENSG00000116786;AL121992.1_ENSG00000264048 |
| 1 | 1.6E+07 | 1.6E+07 | KD2-H4K8la_peak_88 | 7.41831  |                                                                                |
| 1 | 1.6E+07 | 1.6E+07 | KD2-H4K8la_peak_89 | 5.66328  | CLCNKA_ENSG00000186510                                                         |
| 1 | 1.6E+07 | 1.6E+07 | KD2-H4K8la_peak_90 | 6.2946   |                                                                                |

|   |         |         |                     |          |                                                       |
|---|---------|---------|---------------------|----------|-------------------------------------------------------|
| 1 | 1.7E+07 | 1.7E+07 | KD2-H4K8la_peak_91  | 12.52637 |                                                       |
| 1 | 1.7E+07 | 1.7E+07 | KD2-H4K8la_peak_92  | 10.04111 | FBXO42_ENSG00000037637;SZRD1_ENSG00000055070          |
| 1 | 1.7E+07 | 1.7E+07 | KD2-H4K8la_peak_93  | 6.13507  |                                                       |
| 1 | 1.7E+07 | 1.7E+07 | KD2-H4K8la_peak_94  | 5.29444  | NECAP2_ENSG00000157191                                |
| 1 | 1.7E+07 | 1.7E+07 | KD2-H4K8la_peak_95  | 18.85804 | NBPF1_ENSG00000219481                                 |
| 1 | 1.7E+07 | 1.7E+07 | KD2-H4K8la_peak_96  | 8.83002  | CROCCP2_ENSG00000215908;MST1P2_ENSG00000186301        |
| 1 | 1.7E+07 | 1.7E+07 | KD2-H4K8la_peak_97  | 13.63087 | CROCCP2_ENSG00000215908;MST1P2_ENSG00000186301        |
| 1 | 1.7E+07 | 1.7E+07 | KD2-H4K8la_peak_98  | 7.43997  |                                                       |
| 1 | 1.7E+07 | 1.7E+07 | KD2-H4K8la_peak_99  | 10.47118 | RNU1-2_ENSG00000207005                                |
| 1 | 1.7E+07 | 1.7E+07 | KD2-H4K8la_peak_100 | 16.1269  |                                                       |
| 1 | 1.7E+07 | 1.7E+07 | KD2-H4K8la_peak_101 | 5.84385  |                                                       |
| 1 | 1.7E+07 | 1.7E+07 | KD2-H4K8la_peak_102 | 10.20357 |                                                       |
| 1 | 1.8E+07 | 1.8E+07 | KD2-H4K8la_peak_103 | 10.7833  |                                                       |
| 1 | 1.8E+07 | 1.8E+07 | KD2-H4K8la_peak_104 | 8.37064  | ARHGEF10L_ENSG00000074964                             |
| 1 | 1.8E+07 | 1.8E+07 | KD2-H4K8la_peak_105 | 5.64331  |                                                       |
| 1 | 1.8E+07 | 1.8E+07 | KD2-H4K8la_peak_106 | 8.52847  |                                                       |
| 1 | 1.8E+07 | 1.8E+07 | KD2-H4K8la_peak_107 | 5.43278  |                                                       |
| 1 | 2E+07   | 2E+07   | KD2-H4K8la_peak_108 | 6.3399   | EMC1_ENSG00000127463;MRTO4_ENSG00000053372            |
| 1 | 2E+07   | 2E+07   | KD2-H4K8la_peak_109 | 6.83927  | AKR7A2_ENSG00000053371;PQLC2_ENSG00000040487          |
| 1 | 2E+07   | 2E+07   | KD2-H4K8la_peak_110 | 11.36807 |                                                       |
| 1 | 2E+07   | 2E+07   | KD2-H4K8la_peak_111 | 6.3399   | HTR6_ENSG00000158748                                  |
| 1 | 2E+07   | 2E+07   | KD2-H4K8la_peak_112 | 9.35473  | TMCO4_ENSG00000162542                                 |
| 1 | 2E+07   | 2E+07   | KD2-H4K8la_peak_113 | 7.13237  | OTUD3_ENSG00000169914                                 |
| 1 | 2.1E+07 | 2.1E+07 | KD2-H4K8la_peak_114 | 10.20357 |                                                       |
| 1 | 2.1E+07 | 2.1E+07 | KD2-H4K8la_peak_115 | 9.90319  |                                                       |
| 1 | 2.2E+07 | 2.2E+07 | KD2-H4K8la_peak_116 | 8.76082  |                                                       |
| 1 | 2.2E+07 | 2.2E+07 | KD2-H4K8la_peak_117 | 8.7731   |                                                       |
| 1 | 2.2E+07 | 2.2E+07 | KD2-H4K8la_peak_118 | 5.05146  |                                                       |
| 1 | 2.2E+07 | 2.2E+07 | KD2-H4K8la_peak_119 | 6.96161  |                                                       |
| 1 | 2.2E+07 | 2.2E+07 | KD2-H4K8la_peak_120 | 7.41831  | ALPL_ENSG00000162551                                  |
| 1 | 2.2E+07 | 2.2E+07 | KD2-H4K8la_peak_121 | 4.98702  |                                                       |
| 1 | 2.2E+07 | 2.2E+07 | KD2-H4K8la_peak_122 | 9.0413   | RP1-224A6.3_ENSG00000228397;LINC00339_ENSG00000218510 |
| 1 | 2.2E+07 | 2.2E+07 | KD2-H4K8la_peak_123 | 5.43278  | RP1-224A6.3_ENSG00000228397;LINC00339_ENSG00000218510 |
| 1 | 2.3E+07 | 2.3E+07 | KD2-H4K8la_peak_124 | 8.27395  |                                                       |
| 1 | 2.3E+07 | 2.3E+07 | KD2-H4K8la_peak_125 | 4.86896  |                                                       |
| 1 | 2.3E+07 | 2.3E+07 | KD2-H4K8la_peak_126 | 6.10429  |                                                       |
| 1 | 2.3E+07 | 2.3E+07 | KD2-H4K8la_peak_127 | 5.42108  |                                                       |
| 1 | 2.3E+07 | 2.3E+07 | KD2-H4K8la_peak_128 | 7.49467  | ZBTB40_ENSG00000184677                                |
| 1 | 2.3E+07 | 2.3E+07 | KD2-H4K8la_peak_129 | 7.13237  | EPHB2_ENSG00000133216                                 |
| 1 | 2.4E+07 | 2.4E+07 | KD2-H4K8la_peak_130 | 7.12014  | E2F2_ENSG00000007968                                  |
| 1 | 2.4E+07 | 2.4E+07 | KD2-H4K8la_peak_131 | 4.30663  |                                                       |
| 1 | 2.4E+07 | 2.4E+07 | KD2-H4K8la_peak_132 | 12.32641 |                                                       |
| 1 | 2.4E+07 | 2.4E+07 | KD2-H4K8la_peak_133 | 10.91646 |                                                       |
| 1 | 2.4E+07 | 2.4E+07 | KD2-H4K8la_peak_134 | 7.13237  |                                                       |
| 1 | 2.4E+07 | 2.4E+07 | KD2-H4K8la_peak_135 | 6.3399   | TCEB3_ENSG00000011007                                 |
| 1 | 2.4E+07 | 2.4E+07 | KD2-H4K8la_peak_136 | 6.96161  | RP5-886K2.3_ENSG00000236810;PITHD1_ENSG00000057757    |

|   |         |         |                     |          |                                                    |
|---|---------|---------|---------------------|----------|----------------------------------------------------|
| 1 | 2.4E+07 | 2.4E+07 | KD2-H4K8la_peak_137 | 8.6948   |                                                    |
| 1 | 2.5E+07 | 2.5E+07 | KD2-H4K8la_peak_138 | 6.13507  | RCAN3_ENSG00000117602                              |
| 1 | 2.5E+07 | 2.5E+07 | KD2-H4K8la_peak_139 | 10.28981 |                                                    |
| 1 | 2.6E+07 | 2.6E+07 | KD2-H4K8la_peak_140 | 5.58883  | SYF2_ENSG00000117614                               |
| 1 | 2.6E+07 | 2.6E+07 | KD2-H4K8la_peak_141 | 7.58011  |                                                    |
| 1 | 2.6E+07 | 2.6E+07 | KD2-H4K8la_peak_142 | 8.74872  |                                                    |
| 1 | 2.6E+07 | 2.6E+07 | KD2-H4K8la_peak_143 | 15.92725 |                                                    |
| 1 | 2.6E+07 | 2.6E+07 | KD2-H4K8la_peak_144 | 10.23822 | PAFAH2_ENSG00000158006                             |
| 1 | 2.6E+07 | 2.6E+07 | KD2-H4K8la_peak_145 | 4.86896  |                                                    |
| 1 | 2.7E+07 | 2.7E+07 | KD2-H4K8la_peak_146 | 6.68593  |                                                    |
| 1 | 2.7E+07 | 2.7E+07 | KD2-H4K8la_peak_147 | 6.89612  | PIGV_ENSG00000060642                               |
| 1 | 2.7E+07 | 2.7E+07 | KD2-H4K8la_peak_148 | 4.66279  | PIGV_ENSG00000060642                               |
| 1 | 2.7E+07 | 2.7E+07 | KD2-H4K8la_peak_149 | 5.27672  | ZDHHC18_ENSG00000204160                            |
| 1 | 2.7E+07 | 2.7E+07 | KD2-H4K8la_peak_150 | 5.67034  | GPATCH3_ENSG00000198746;NUDC_ENSG00000090273       |
| 1 | 2.7E+07 | 2.7E+07 | KD2-H4K8la_peak_151 | 8.24531  |                                                    |
| 1 | 2.7E+07 | 2.7E+07 | KD2-H4K8la_peak_152 | 6.5142   |                                                    |
| 1 | 2.8E+07 | 2.8E+07 | KD2-H4K8la_peak_153 | 9.32091  | RP11-40H20.4_ENSG00000224311;WDTC1_ENSG00000142784 |
| 1 | 2.8E+07 | 2.8E+07 | KD2-H4K8la_peak_154 | 6.13528  |                                                    |
| 1 | 2.8E+07 | 2.8E+07 | KD2-H4K8la_peak_155 | 8.50453  |                                                    |
| 1 | 2.8E+07 | 2.8E+07 | KD2-H4K8la_peak_156 | 11.50202 | WASF2_ENSG00000158195                              |
| 1 | 2.8E+07 | 2.8E+07 | KD2-H4K8la_peak_157 | 11.06859 |                                                    |
| 1 | 2.8E+07 | 2.8E+07 | KD2-H4K8la_peak_158 | 12.39776 |                                                    |
| 1 | 2.8E+07 | 2.8E+07 | KD2-H4K8la_peak_159 | 7.81267  |                                                    |
| 1 | 2.8E+07 | 2.8E+07 | KD2-H4K8la_peak_160 | 11.6827  | RP11-288L9.1_ENSG00000233975                       |
| 1 | 2.8E+07 | 2.8E+07 | KD2-H4K8la_peak_161 | 7.49467  | FAM76A_ENSG00000009780                             |
| 1 | 2.8E+07 | 2.8E+07 | KD2-H4K8la_peak_162 | 5.28047  | PPP1R8_ENSG00000117751                             |
| 1 | 2.9E+07 | 2.9E+07 | KD2-H4K8la_peak_163 | 13.95774 |                                                    |
| 1 | 2.9E+07 | 2.9E+07 | KD2-H4K8la_peak_164 | 7.13185  |                                                    |
| 1 | 2.9E+07 | 2.9E+07 | KD2-H4K8la_peak_165 | 7.49467  | MED18_ENSG00000130772                              |
| 1 | 2.9E+07 | 2.9E+07 | KD2-H4K8la_peak_166 | 9.5329   | PHACTR4_ENSG00000204138                            |
| 1 | 2.9E+07 | 2.9E+07 | KD2-H4K8la_peak_167 | 6.13528  |                                                    |
| 1 | 2.9E+07 | 2.9E+07 | KD2-H4K8la_peak_168 | 8.487    | TRNAU1AP_ENSG00000180098                           |
| 1 | 2.9E+07 | 2.9E+07 | KD2-H4K8la_peak_169 | 8.07102  | RNU11_ENSG00000270103                              |
| 1 | 2.9E+07 | 2.9E+07 | KD2-H4K8la_peak_170 | 7.8597   | GMEB1_ENSG00000162419                              |
| 1 | 2.9E+07 | 2.9E+07 | KD2-H4K8la_peak_171 | 15.92725 | GMEB1_ENSG00000162419                              |
| 1 | 2.9E+07 | 2.9E+07 | KD2-H4K8la_peak_172 | 7.92775  | YTHDF2_ENSG00000198492                             |
| 1 | 2.9E+07 | 2.9E+07 | KD2-H4K8la_peak_173 | 6.72794  |                                                    |
| 1 | 2.9E+07 | 2.9E+07 | KD2-H4K8la_peak_174 | 6.64804  | EPB41_ENSG00000159023                              |
| 1 | 3E+07   | 3E+07   | KD2-H4K8la_peak_175 | 9.90319  | SRSF4_ENSG00000116350                              |
| 1 | 3E+07   | 3E+07   | KD2-H4K8la_peak_176 | 4.7338   | SRSF4_ENSG00000116350                              |
| 1 | 3E+07   | 3E+07   | KD2-H4K8la_peak_177 | 7.12014  |                                                    |
| 1 | 3E+07   | 3E+07   | KD2-H4K8la_peak_178 | 6.86458  |                                                    |
| 1 | 3E+07   | 3E+07   | KD2-H4K8la_peak_179 | 4.86896  |                                                    |
| 1 | 3E+07   | 3E+07   | KD2-H4K8la_peak_180 | 17.48572 |                                                    |
| 1 | 3E+07   | 3E+07   | KD2-H4K8la_peak_181 | 6.64804  |                                                    |
| 1 | 3E+07   | 3E+07   | KD2-H4K8la_peak_182 | 11.20123 |                                                    |

|   |         |         |                     |          |                                                      |
|---|---------|---------|---------------------|----------|------------------------------------------------------|
| 1 | 3E+07   | 3E+07   | KD2-H4K8la_peak_183 | 5.83285  |                                                      |
| 1 | 3E+07   | 3E+07   | KD2-H4K8la_peak_184 | 12.03112 |                                                      |
| 1 | 3E+07   | 3E+07   | KD2-H4K8la_peak_185 | 4.94337  |                                                      |
| 1 | 3.1E+07 | 3.1E+07 | KD2-H4K8la_peak_186 | 13.6415  |                                                      |
| 1 | 3.1E+07 | 3.1E+07 | KD2-H4K8la_peak_187 | 6.3399   |                                                      |
| 1 | 3.1E+07 | 3.1E+07 | KD2-H4K8la_peak_188 | 6.13507  | SDC3_ENSG00000162512                                 |
| 1 | 3.2E+07 | 3.2E+07 | KD2-H4K8la_peak_189 | 9.61894  |                                                      |
| 1 | 3.2E+07 | 3.2E+07 | KD2-H4K8la_peak_190 | 11.87091 |                                                      |
| 1 | 3.2E+07 | 3.2E+07 | KD2-H4K8la_peak_191 | 9.0516   |                                                      |
| 1 | 3.2E+07 | 3.2E+07 | KD2-H4K8la_peak_192 | 10.39665 | HCRTR1_ENSG00000121764                               |
| 1 | 3.2E+07 | 3.2E+07 | KD2-H4K8la_peak_193 | 6.36118  |                                                      |
| 1 | 3.2E+07 | 3.2E+07 | KD2-H4K8la_peak_194 | 6.25288  |                                                      |
| 1 | 3.2E+07 | 3.2E+07 | KD2-H4K8la_peak_195 | 7.13237  |                                                      |
| 1 | 3.2E+07 | 3.2E+07 | KD2-H4K8la_peak_196 | 7.49467  | SPOCD1_ENSG00000134668                               |
| 1 | 3.2E+07 | 3.2E+07 | KD2-H4K8la_peak_197 | 6.3399   |                                                      |
| 1 | 3.3E+07 | 3.3E+07 | KD2-H4K8la_peak_198 | 12.13455 | RP4-622L5.7_ENSG00000224066;IQCC_ENSG00000160051     |
| 1 | 3.3E+07 | 3.3E+07 | KD2-H4K8la_peak_199 | 5.55184  | MARCKSL1_ENSG00000175130                             |
| 1 | 3.3E+07 | 3.3E+07 | KD2-H4K8la_peak_200 | 13.27013 | KIAA1522_ENSG00000162522                             |
| 1 | 3.3E+07 | 3.3E+07 | KD2-H4K8la_peak_201 | 9.7321   | YARS_ENSG00000134684                                 |
| 1 | 3.3E+07 | 3.3E+07 | KD2-H4K8la_peak_202 | 4.30663  |                                                      |
| 1 | 3.3E+07 | 3.3E+07 | KD2-H4K8la_peak_203 | 5.27164  | TMEM54_ENSG00000121900                               |
| 1 | 3.3E+07 | 3.3E+07 | KD2-H4K8la_peak_204 | 5.58883  | FKSG48_ENSG00000267885                               |
| 1 | 3.4E+07 | 3.4E+07 | KD2-H4K8la_peak_205 | 8.13727  |                                                      |
| 1 | 3.6E+07 | 3.6E+07 | KD2-H4K8la_peak_206 | 8.26997  | SFPQ_ENSG00000116560                                 |
| 1 | 3.6E+07 | 3.6E+07 | KD2-H4K8la_peak_207 | 7.12014  |                                                      |
| 1 | 3.6E+07 | 3.6E+07 | KD2-H4K8la_peak_208 | 15.92725 |                                                      |
| 1 | 3.6E+07 | 3.6E+07 | KD2-H4K8la_peak_209 | 7.12014  | C1orf216_ENSG00000142686                             |
| 1 | 3.6E+07 | 3.6E+07 | KD2-H4K8la_peak_210 | 7.13237  |                                                      |
| 1 | 3.6E+07 | 3.6E+07 | KD2-H4K8la_peak_211 | 4.66279  | AGO4_ENSG00000134698                                 |
| 1 | 3.7E+07 | 3.7E+07 | KD2-H4K8la_peak_212 | 5.58883  |                                                      |
| 1 | 3.7E+07 | 3.7E+07 | KD2-H4K8la_peak_213 | 7.3993   | COL8A2_ENSG00000171812                               |
| 1 | 3.7E+07 | 3.7E+07 | KD2-H4K8la_peak_214 | 5.5977   |                                                      |
| 1 | 3.7E+07 | 3.7E+07 | KD2-H4K8la_peak_215 | 15.80488 |                                                      |
| 1 | 3.8E+07 | 3.8E+07 | KD2-H4K8la_peak_216 | 7.13237  |                                                      |
| 1 | 3.8E+07 | 3.8E+07 | KD2-H4K8la_peak_217 | 6.2278   | FHL3_ENSG00000183386                                 |
| 1 | 4E+07   | 4E+07   | KD2-H4K8la_peak_218 | 6.95378  |                                                      |
| 1 | 4.1E+07 | 4.1E+07 | KD2-H4K8la_peak_219 | 5.63532  |                                                      |
| 1 | 4.1E+07 | 4.1E+07 | KD2-H4K8la_peak_220 | 11.15747 | RP1-39G22.7_ENSG00000259943;ZMPSTE24_ENSG00000084073 |
| 1 | 4.1E+07 | 4.1E+07 | KD2-H4K8la_peak_221 | 18.96048 | CTPS1_ENSG00000171793                                |
| 1 | 4.1E+07 | 4.1E+07 | KD2-H4K8la_peak_222 | 7.77341  | CTPS1_ENSG00000171793                                |
| 1 | 4.2E+07 | 4.2E+07 | KD2-H4K8la_peak_223 | 8.39919  | SCMH1_ENSG00000010803;RP11-399E6.1_ENSG00000235358   |
| 1 | 4.2E+07 | 4.2E+07 | KD2-H4K8la_peak_224 | 12.23212 |                                                      |
| 1 | 4.2E+07 | 4.2E+07 | KD2-H4K8la_peak_225 | 7.38202  |                                                      |
| 1 | 4.2E+07 | 4.2E+07 | KD2-H4K8la_peak_226 | 5.99671  |                                                      |
| 1 | 4.2E+07 | 4.2E+07 | KD2-H4K8la_peak_227 | 5.4856   |                                                      |
| 1 | 4.2E+07 | 4.2E+07 | KD2-H4K8la_peak_228 | 12.25633 |                                                      |

|   |         |         |                     |          |                                                      |
|---|---------|---------|---------------------|----------|------------------------------------------------------|
| 1 | 4.2E+07 | 4.2E+07 | KD2-H4K8la_peak_229 | 6.18994  |                                                      |
| 1 | 4.3E+07 | 4.3E+07 | KD2-H4K8la_peak_230 | 10.04111 | ZMYND12_ENSG00000066185;PPCS_ENSG00000127125         |
| 1 | 4.3E+07 | 4.3E+07 | KD2-H4K8la_peak_231 | 9.27415  | RP11-342M1.3_ENSG00000228192;ZNF691_ENSG00000164011  |
| 1 | 4.3E+07 | 4.3E+07 | KD2-H4K8la_peak_232 | 10.73719 |                                                      |
| 1 | 4.3E+07 | 4.3E+07 | KD2-H4K8la_peak_233 | 8.07102  |                                                      |
| 1 | 4.4E+07 | 4.4E+07 | KD2-H4K8la_peak_234 | 6.25288  |                                                      |
| 1 | 4.4E+07 | 4.4E+07 | KD2-H4K8la_peak_235 | 14.07018 |                                                      |
| 1 | 4.4E+07 | 4.4E+07 | KD2-H4K8la_peak_236 | 4.36246  | MED8_ENSG00000159479;SZT2_ENSG00000198198            |
| 1 | 4.4E+07 | 4.4E+07 | KD2-H4K8la_peak_237 | 6.79079  | HYI_ENSG00000178922;HYI-AS1_ENSG00000229348          |
| 1 | 4.4E+07 | 4.4E+07 | KD2-H4K8la_peak_238 | 9.10568  |                                                      |
| 1 | 4.4E+07 | 4.4E+07 | KD2-H4K8la_peak_239 | 7.17272  | SLC6A9_ENSG00000196517                               |
| 1 | 4.5E+07 | 4.5E+07 | KD2-H4K8la_peak_240 | 7.90495  |                                                      |
| 1 | 4.5E+07 | 4.5E+07 | KD2-H4K8la_peak_241 | 12.32641 |                                                      |
| 1 | 4.5E+07 | 4.5E+07 | KD2-H4K8la_peak_242 | 6.61963  |                                                      |
| 1 | 4.5E+07 | 4.5E+07 | KD2-H4K8la_peak_243 | 8.43222  | PTCH2_ENSG00000117425;RP5-882O7.1_ENSG00000226499    |
| 1 | 4.6E+07 | 4.6E+07 | KD2-H4K8la_peak_244 | 7.51014  | IPP_ENSG00000197429                                  |
| 1 | 4.6E+07 | 4.6E+07 | KD2-H4K8la_peak_245 | 6.60114  | IPP_ENSG00000197429                                  |
| 1 | 4.7E+07 | 4.7E+07 | KD2-H4K8la_peak_246 | 5.33721  |                                                      |
| 1 | 4.7E+07 | 4.7E+07 | KD2-H4K8la_peak_247 | 16.56946 |                                                      |
| 1 | 4.7E+07 | 4.7E+07 | KD2-H4K8la_peak_248 | 10.25348 |                                                      |
| 1 | 4.7E+07 | 4.7E+07 | KD2-H4K8la_peak_249 | 14.5688  | LRRC41_ENSG00000132128;UQCRH_ENSG00000173660         |
| 1 | 4.7E+07 | 4.7E+07 | KD2-H4K8la_peak_250 | 6.64643  | NSUN4_ENSG00000117481                                |
| 1 | 4.7E+07 | 4.7E+07 | KD2-H4K8la_peak_251 | 7.3993   | NSUN4_ENSG00000117481                                |
| 1 | 4.7E+07 | 4.7E+07 | KD2-H4K8la_peak_252 | 8.79494  |                                                      |
| 1 | 4.7E+07 | 4.7E+07 | KD2-H4K8la_peak_253 | 6.64804  |                                                      |
| 1 | 4.7E+07 | 4.7E+07 | KD2-H4K8la_peak_254 | 15.42498 | EFCAB14_ENSG00000159658                              |
| 1 | 4.8E+07 | 4.8E+07 | KD2-H4K8la_peak_255 | 6.61963  | CMPK1_ENSG00000162368                                |
| 1 | 5.1E+07 | 5.1E+07 | KD2-H4K8la_peak_256 | 11.35192 |                                                      |
| 1 | 5.1E+07 | 5.1E+07 | KD2-H4K8la_peak_257 | 11.06859 |                                                      |
| 1 | 5.2E+07 | 5.2E+07 | KD2-H4K8la_peak_258 | 5.05146  | RP11-275F13.1_ENSG00000261664                        |
| 1 | 5.2E+07 | 5.2E+07 | KD2-H4K8la_peak_259 | 10.07718 | NRD1_ENSG00000078618                                 |
| 1 | 5.3E+07 | 5.3E+07 | KD2-H4K8la_peak_260 | 6.86458  | TXNDC12_ENSG00000117862;BTF3L4_ENSG00000134717       |
| 1 | 5.3E+07 | 5.3E+07 | KD2-H4K8la_peak_261 | 8.76116  | RP11-25O10.2_ENSG00000272371;ZCCHC11_ENSG00000134744 |
| 1 | 5.3E+07 | 5.3E+07 | KD2-H4K8la_peak_262 | 9.27415  | FAM159A_ENSG00000182183                              |
| 1 | 5.4E+07 | 5.4E+07 | KD2-H4K8la_peak_263 | 8.86558  | MAGOH_ENSG00000162385;RP5-1024G6.5_ENSG00000226754   |
| 1 | 5.4E+07 | 5.4E+07 | KD2-H4K8la_peak_264 | 8.16787  | LRP8_ENSG00000157193;RP4-784A16.5_ENSG00000225675    |
| 1 | 5.4E+07 | 5.4E+07 | KD2-H4K8la_peak_265 | 6.61495  | RP11-117D22.2_ENSG00000230138                        |
| 1 | 5.4E+07 | 5.4E+07 | KD2-H4K8la_peak_266 | 5.83285  |                                                      |
| 1 | 5.4E+07 | 5.4E+07 | KD2-H4K8la_peak_267 | 5.83285  |                                                      |
| 1 | 5.5E+07 | 5.5E+07 | KD2-H4K8la_peak_268 | 5.67596  |                                                      |
| 1 | 5.5E+07 | 5.5E+07 | KD2-H4K8la_peak_269 | 11.36807 |                                                      |
| 1 | 5.5E+07 | 5.5E+07 | KD2-H4K8la_peak_270 | 6.4136   | ACOT11_ENSG00000162390                               |
| 1 | 5.5E+07 | 5.5E+07 | KD2-H4K8la_peak_271 | 8.1293   | ACOT11_ENSG00000162390                               |
| 1 | 5.5E+07 | 5.5E+07 | KD2-H4K8la_peak_272 | 7.06427  |                                                      |
| 1 | 5.6E+07 | 5.6E+07 | KD2-H4K8la_peak_273 | 6.57426  | USP24_ENSG00000162402                                |
| 1 | 5.6E+07 | 5.6E+07 | KD2-H4K8la_peak_274 | 5.29444  | USP24_ENSG00000162402                                |

|   |         |         |                     |          |                                                                                                |
|---|---------|---------|---------------------|----------|------------------------------------------------------------------------------------------------|
| 1 | 5.6E+07 | 5.6E+07 | KD2-H4K8la_peak_275 | 9.49266  |                                                                                                |
| 1 | 5.7E+07 | 5.7E+07 | KD2-H4K8la_peak_276 | 6.3399   |                                                                                                |
| 1 | 5.7E+07 | 5.7E+07 | KD2-H4K8la_peak_277 | 5.43278  | PPAP2B_ENSG00000162407;PRKAA2_ENSG00000162409                                                  |
| 1 | 5.9E+07 | 5.9E+07 | KD2-H4K8la_peak_278 | 12.67978 |                                                                                                |
| 1 | 6E+07   | 6E+07   | KD2-H4K8la_peak_279 | 8.39813  | FGGY_ENSG00000172456                                                                           |
| 1 | 6E+07   | 6E+07   | KD2-H4K8la_peak_280 | 4.6555   | HOOK1_ENSG00000134709                                                                          |
| 1 | 6.1E+07 | 6.1E+07 | KD2-H4K8la_peak_281 | 6.2278   |                                                                                                |
| 1 | 6.1E+07 | 6.1E+07 | KD2-H4K8la_peak_282 | 6.70626  |                                                                                                |
| 1 | 6.2E+07 | 6.2E+07 | KD2-H4K8la_peak_283 | 13.2369  |                                                                                                |
| 1 | 6.2E+07 | 6.2E+07 | KD2-H4K8la_peak_284 | 8.73956  | RP11-430G17.3_ENSG00000271200;INADL_ENSG00000132849                                            |
| 1 | 6.3E+07 | 6.3E+07 | KD2-H4K8la_peak_285 | 7.86224  | USP1_ENSG00000162607                                                                           |
| 1 | 6.3E+07 | 6.3E+07 | KD2-H4K8la_peak_286 | 6.70626  | ATG4C_ENSG00000125703                                                                          |
| 1 | 6.4E+07 | 6.4E+07 | KD2-H4K8la_peak_287 | 7.81267  | ALG6_ENSG00000088035                                                                           |
| 1 | 6.5E+07 | 6.5E+07 | KD2-H4K8la_peak_288 | 7.26721  |                                                                                                |
| 1 | 6.6E+07 | 6.6E+07 | KD2-H4K8la_peak_289 | 13.18631 |                                                                                                |
| 1 | 6.8E+07 | 6.8E+07 | KD2-H4K8la_peak_290 | 5.91129  |                                                                                                |
| 1 | 6.8E+07 | 6.8E+07 | KD2-H4K8la_peak_291 | 8.07102  |                                                                                                |
| 1 | 6.8E+07 | 6.8E+07 | KD2-H4K8la_peak_292 | 6.2278   | GADD45A_ENSG00000116717                                                                        |
| 1 | 6.8E+07 | 6.8E+07 | KD2-H4K8la_peak_293 | 8.13727  |                                                                                                |
| 1 | 7.1E+07 | 7.1E+07 | KD2-H4K8la_peak_294 | 6.3399   | ANKRD13C_ENSG00000118454;HHLA3_ENSG00000197568                                                 |
| 1 | 7.3E+07 | 7.3E+07 | KD2-H4K8la_peak_295 | 5.72892  |                                                                                                |
| 1 | 7.5E+07 | 7.5E+07 | KD2-H4K8la_peak_296 | 4.86896  | LRRIQ3_ENSG00000162620;FPGT_ENSG00000254685;FPGT-TNNI3K_ENSG00000259030;TNNI3K_ENSG00000116783 |
| 1 | 7.6E+07 | 7.6E+07 | KD2-H4K8la_peak_297 | 7.56395  |                                                                                                |
| 1 | 7.8E+07 | 7.8E+07 | KD2-H4K8la_peak_298 | 10.04111 | PIGK_ENSG00000142892                                                                           |
| 1 | 8.4E+07 | 8.4E+07 | KD2-H4K8la_peak_299 | 5.72892  | TTL7_ENSG00000137941                                                                           |
| 1 | 8.5E+07 | 8.5E+07 | KD2-H4K8la_peak_300 | 6.57319  | SAMD13_ENSG00000203943                                                                         |
| 1 | 8.7E+07 | 8.7E+07 | KD2-H4K8la_peak_301 | 5.72892  |                                                                                                |
| 1 | 8.7E+07 | 8.7E+07 | KD2-H4K8la_peak_302 | 6.86458  | RP4-612B15.3_ENSG00000261737                                                                   |
| 1 | 9E+07   | 9E+07   | KD2-H4K8la_peak_303 | 11.77509 | LRR8B_ENSG00000197147                                                                          |
| 1 | 9E+07   | 9E+07   | KD2-H4K8la_peak_304 | 5.05146  |                                                                                                |
| 1 | 9.1E+07 | 9.1E+07 | KD2-H4K8la_peak_305 | 9.6708   | ZNF644_ENSG00000122482                                                                         |
| 1 | 9.3E+07 | 9.3E+07 | KD2-H4K8la_peak_306 | 4.57647  |                                                                                                |
| 1 | 9.4E+07 | 9.4E+07 | KD2-H4K8la_peak_307 | 7.72421  | FBNP1L_ENSG00000137942                                                                         |
| 1 | 9.4E+07 | 9.4E+07 | KD2-H4K8la_peak_308 | 11.81691 |                                                                                                |
| 1 | 9.4E+07 | 9.4E+07 | KD2-H4K8la_peak_309 | 10.00175 |                                                                                                |
| 1 | 9.4E+07 | 9.4E+07 | KD2-H4K8la_peak_310 | 6.96161  | BCAR3_ENSG00000137936;MIR760_ENSG00000211575;RP4-561L24.3_ENSG00000260464                      |
| 1 | 9.4E+07 | 9.4E+07 | KD2-H4K8la_peak_311 | 6.60114  | DNTTIP2_ENSG00000067334                                                                        |
| 1 | 9.5E+07 | 9.5E+07 | KD2-H4K8la_peak_312 | 7.49467  |                                                                                                |
| 1 | 9.5E+07 | 9.5E+07 | KD2-H4K8la_peak_313 | 9.90319  |                                                                                                |
| 1 | 9.5E+07 | 9.5E+07 | KD2-H4K8la_peak_314 | 10.20357 | LINC01057_ENSG00000224081;SLC44A3_ENSG00000143036                                              |
| 1 | 9.6E+07 | 9.6E+07 | KD2-H4K8la_peak_315 | 6.22999  | RP11-14O19.2_ENSG00000237954                                                                   |
| 1 | 9.7E+07 | 9.7E+07 | KD2-H4K8la_peak_316 | 8.37064  | PTBP2_ENSG00000117569                                                                          |
| 1 | 9.9E+07 | 9.9E+07 | KD2-H4K8la_peak_317 | 8.24908  |                                                                                                |
| 1 | 9.9E+07 | 9.9E+07 | KD2-H4K8la_peak_318 | 4.94337  | LPPR5_ENSG00000117598;RP5-896L10.1_ENSG00000232825                                             |
| 1 | 9.9E+07 | 9.9E+07 | KD2-H4K8la_peak_319 | 5.72892  |                                                                                                |
| 1 | 1E+08   | 1E+08   | KD2-H4K8la_peak_320 | 4.35346  | RP5-884G6.2_ENSG00000228084;SLC35A3_ENSG00000117620                                            |

|   |         |         |                     |          |                                                                                     |
|---|---------|---------|---------------------|----------|-------------------------------------------------------------------------------------|
| 1 | 1E+08   | 1E+08   | KD2-H4K8la_peak_321 | 8.7731   | RP11-305E17.6_ENSG00000224616;RTCA_ENSG00000137996                                  |
| 1 | 1E+08   | 1E+08   | KD2-H4K8la_peak_322 | 6.36118  | EXTL2_ENSG00000162694;RP4-549L20.3_ENSG00000273204;SLC30A7_ENSG00000162695          |
| 1 | 1.1E+08 | 1.1E+08 | KD2-H4K8la_peak_323 | 10.98662 |                                                                                     |
| 1 | 1.1E+08 | 1.1E+08 | KD2-H4K8la_peak_324 | 11.24937 | PRMT6_ENSG00000198890                                                               |
| 1 | 1.1E+08 | 1.1E+08 | KD2-H4K8la_peak_325 | 5.98303  | VAV3_ENSG00000134215;VAV3-AS1_ENSG00000230489                                       |
| 1 | 1.1E+08 | 1.1E+08 | KD2-H4K8la_peak_326 | 5.36015  | STXBP3_ENSG00000116266                                                              |
| 1 | 1.1E+08 | 1.1E+08 | KD2-H4K8la_peak_327 | 9.0413   | TAF13_ENSG00000197780                                                               |
| 1 | 1.1E+08 | 1.1E+08 | KD2-H4K8la_peak_328 | 8.72694  |                                                                                     |
| 1 | 1.1E+08 | 1.1E+08 | KD2-H4K8la_peak_329 | 5.16795  | CSF1_ENSG00000184371                                                                |
| 1 | 1.1E+08 | 1.1E+08 | KD2-H4K8la_peak_330 | 8.07044  | AHCYL1_ENSG00000168710                                                              |
| 1 | 1.1E+08 | 1.1E+08 | KD2-H4K8la_peak_331 | 7.49467  | RP4-773N10.4_ENSG00000258634                                                        |
| 1 | 1.1E+08 | 1.1E+08 | KD2-H4K8la_peak_332 | 8.16787  |                                                                                     |
| 1 | 1.1E+08 | 1.1E+08 | KD2-H4K8la_peak_333 | 7.49467  |                                                                                     |
| 1 | 1.1E+08 | 1.1E+08 | KD2-H4K8la_peak_334 | 14.52454 | CAPZA1_ENSG00000116489                                                              |
| 1 | 1.1E+08 | 1.1E+08 | KD2-H4K8la_peak_335 | 6.04152  |                                                                                     |
| 1 | 1.1E+08 | 1.1E+08 | KD2-H4K8la_peak_336 | 4.45136  | RP11-31F15.2_ENSG00000238198;LRIG2_ENSG00000198799                                  |
| 1 | 1.1E+08 | 1.1E+08 | KD2-H4K8la_peak_337 | 6.04312  |                                                                                     |
| 1 | 1.2E+08 | 1.2E+08 | KD2-H4K8la_peak_338 | 14.40178 | BCAS2_ENSG00000116752                                                               |
| 1 | 1.2E+08 | 1.2E+08 | KD2-H4K8la_peak_339 | 12.06531 | CSDE1_ENSG0000009307                                                                |
| 1 | 1.2E+08 | 1.2E+08 | KD2-H4K8la_peak_340 | 9.6708   | NGF_ENSG00000134259                                                                 |
| 1 | 1.2E+08 | 1.2E+08 | KD2-H4K8la_peak_341 | 6.36118  | ATP1A1OS_ENSG00000203865                                                            |
| 1 | 1.2E+08 | 1.2E+08 | KD2-H4K8la_peak_342 | 6.86458  | CD58_ENSG00000116815                                                                |
| 1 | 1.2E+08 | 1.2E+08 | KD2-H4K8la_peak_343 | 9.27415  |                                                                                     |
| 1 | 1.2E+08 | 1.2E+08 | KD2-H4K8la_peak_344 | 10.39665 |                                                                                     |
| 1 | 1.4E+08 | 1.4E+08 | KD2-H4K8la_peak_345 | 11.15747 | RP11-435B5.4_ENSG00000185044                                                        |
| 1 | 1.4E+08 | 1.4E+08 | KD2-H4K8la_peak_346 | 8.37064  |                                                                                     |
| 1 | 1.5E+08 | 1.5E+08 | KD2-H4K8la_peak_347 | 9.5503   | RP11-458D21.1_ENSG00000233396;RNVU1-6_ENSG00000201558                               |
| 1 | 1.5E+08 | 1.5E+08 | KD2-H4K8la_peak_348 | 6.75222  | TXNIP_ENSG00000117289                                                               |
| 1 | 1.5E+08 | 1.5E+08 | KD2-H4K8la_peak_349 | 6.3399   | GNRHR2_ENSG00000211451;PEX11B_ENSG00000131779                                       |
| 1 | 1.5E+08 | 1.5E+08 | KD2-H4K8la_peak_350 | 6.13507  | NUDT17_ENSG00000186364                                                              |
| 1 | 1.5E+08 | 1.5E+08 | KD2-H4K8la_peak_351 | 5.28047  | PRKAB2_ENSG00000131791;RP11-337C18.8_ENSG00000237188;RP11-337C18.10_ENSG00000273071 |
| 1 | 1.5E+08 | 1.5E+08 | KD2-H4K8la_peak_352 | 12.11591 | FMO5_ENSG00000131781;CHD1L_ENSG00000131778                                          |
| 1 | 1.5E+08 | 1.5E+08 | KD2-H4K8la_peak_353 | 7.92775  | BCL9_ENSG00000116128                                                                |
| 1 | 1.5E+08 | 1.5E+08 | KD2-H4K8la_peak_354 | 6.61495  | ACP6_ENSG00000162836                                                                |
| 1 | 1.5E+08 | 1.5E+08 | KD2-H4K8la_peak_355 | 7.06923  | RP11-14N7.2_ENSG00000232527                                                         |
| 1 | 1.5E+08 | 1.5E+08 | KD2-H4K8la_peak_356 | 6.56022  |                                                                                     |
| 1 | 1.5E+08 | 1.5E+08 | KD2-H4K8la_peak_357 | 10.44868 |                                                                                     |
| 1 | 1.5E+08 | 1.5E+08 | KD2-H4K8la_peak_358 | 8.3497   | PLEKHO1_ENSG0000023902                                                              |
| 1 | 1.5E+08 | 1.5E+08 | KD2-H4K8la_peak_359 | 8.84265  |                                                                                     |
| 1 | 1.5E+08 | 1.5E+08 | KD2-H4K8la_peak_360 | 8.00569  | ANP32E_ENSG00000143401                                                              |
| 1 | 1.5E+08 | 1.5E+08 | KD2-H4K8la_peak_361 | 9.41649  |                                                                                     |
| 1 | 1.5E+08 | 1.5E+08 | KD2-H4K8la_peak_362 | 11.24289 | PRPF3_ENSG00000117360                                                               |
| 1 | 1.5E+08 | 1.5E+08 | KD2-H4K8la_peak_363 | 7.12014  | RPRD2_ENSG00000163125                                                               |
| 1 | 1.5E+08 | 1.5E+08 | KD2-H4K8la_peak_364 | 8.39919  | TARS2_ENSG00000143374                                                               |
| 1 | 1.5E+08 | 1.5E+08 | KD2-H4K8la_peak_365 | 10.47452 | SETDB1_ENSG00000143379                                                              |
| 1 | 1.5E+08 | 1.5E+08 | KD2-H4K8la_peak_366 | 9.12246  | CERS2_ENSG00000143418                                                               |



|   |         |         |                     |          |                                                                                                         |
|---|---------|---------|---------------------|----------|---------------------------------------------------------------------------------------------------------|
| 1 | 1.5E+08 | 1.5E+08 | KD2-H4K8la_peak_367 | 13.31601 | CDC42SE1_ENSG00000197622;GABPB2_ENSG00000143458                                                         |
| 1 | 1.5E+08 | 1.5E+08 | KD2-H4K8la_peak_368 | 9.05604  |                                                                                                         |
| 1 | 1.5E+08 | 1.5E+08 | KD2-H4K8la_peak_369 | 9.6708   | PSMB4_ENSG00000159377                                                                                   |
| 1 | 1.5E+08 | 1.5E+08 | KD2-H4K8la_peak_370 | 6.64804  |                                                                                                         |
| 1 | 1.5E+08 | 1.5E+08 | KD2-H4K8la_peak_371 | 5.33301  | MRPL9_ENSG00000143436;OAZ3_ENSG00000143450                                                              |
| 1 | 1.5E+08 | 1.5E+08 | KD2-H4K8la_peak_372 | 5.99671  | S100A6_ENSG00000197956                                                                                  |
| 1 | 1.5E+08 | 1.5E+08 | KD2-H4K8la_peak_373 | 8.39919  |                                                                                                         |
| 1 | 1.5E+08 | 1.5E+08 | KD2-H4K8la_peak_374 | 6.63954  | S100A2_ENSG00000196754                                                                                  |
| 1 | 1.5E+08 | 1.5E+08 | KD2-H4K8la_peak_375 | 13.00097 | S100A13_ENSG00000189171;RP1-178F15.5_ENSG00000271853;RP1-178F15.4_ENSG00000272030;CHTOP_ENSG00000160679 |
| 1 | 1.5E+08 | 1.5E+08 | KD2-H4K8la_peak_376 | 6.73603  |                                                                                                         |
| 1 | 1.5E+08 | 1.5E+08 | KD2-H4K8la_peak_377 | 6.6875   | Y_RNA_ENSG00000199565                                                                                   |
| 1 | 1.5E+08 | 1.5E+08 | KD2-H4K8la_peak_378 | 14.44261 | INTS3_ENSG00000143624                                                                                   |
| 1 | 1.5E+08 | 1.5E+08 | KD2-H4K8la_peak_379 | 8.88448  | CRTC2_ENSG00000160741                                                                                   |
| 1 | 1.5E+08 | 1.5E+08 | KD2-H4K8la_peak_380 | 11.28887 |                                                                                                         |
| 1 | 1.5E+08 | 1.5E+08 | KD2-H4K8la_peak_381 | 5.20532  | C1orf43_ENSG00000143612                                                                                 |
| 1 | 1.5E+08 | 1.5E+08 | KD2-H4K8la_peak_382 | 9.23326  | ATP8B2_ENSG00000143515                                                                                  |
| 1 | 1.5E+08 | 1.5E+08 | KD2-H4K8la_peak_383 | 10.31182 | UBE2Q1_ENSG00000160714                                                                                  |
| 1 | 1.5E+08 | 1.5E+08 | KD2-H4K8la_peak_384 | 6.34086  | PMVK_ENSG00000163344;RP11-307C12.13_ENSG00000270361                                                     |
| 1 | 1.5E+08 | 1.5E+08 | KD2-H4K8la_peak_385 | 5.79108  | RP11-307C12.12_ENSG00000271380                                                                          |
| 1 | 1.5E+08 | 1.5E+08 | KD2-H4K8la_peak_386 | 6.69137  |                                                                                                         |
| 1 | 1.5E+08 | 1.5E+08 | KD2-H4K8la_peak_387 | 10.84044 |                                                                                                         |
| 1 | 1.6E+08 | 1.6E+08 | KD2-H4K8la_peak_388 | 5.54909  |                                                                                                         |
| 1 | 1.6E+08 | 1.6E+08 | KD2-H4K8la_peak_389 | 10.92814 |                                                                                                         |
| 1 | 1.6E+08 | 1.6E+08 | KD2-H4K8la_peak_390 | 11.57314 | EFNA1_ENSG00000169242                                                                                   |
| 1 | 1.6E+08 | 1.6E+08 | KD2-H4K8la_peak_391 | 8.48488  |                                                                                                         |
| 1 | 1.6E+08 | 1.6E+08 | KD2-H4K8la_peak_392 | 13.84838 | KRTCAP2_ENSG00000163463;TRIM46_ENSG00000163462                                                          |
| 1 | 1.6E+08 | 1.6E+08 | KD2-H4K8la_peak_393 | 12.50352 | KRTCAP2_ENSG00000163463;TRIM46_ENSG00000163462                                                          |
| 1 | 1.6E+08 | 1.6E+08 | KD2-H4K8la_peak_394 | 9.7321   | MUC1_ENSG00000185499                                                                                    |
| 1 | 1.6E+08 | 1.6E+08 | KD2-H4K8la_peak_395 | 5.58883  | MUC1_ENSG00000185499;MIR92B_ENSG00000271748                                                             |
| 1 | 1.6E+08 | 1.6E+08 | KD2-H4K8la_peak_396 | 10.02595 | THBS3_ENSG00000169231;MTX1_ENSG00000173171                                                              |
| 1 | 1.6E+08 | 1.6E+08 | KD2-H4K8la_peak_397 | 7.79412  | THBS3_ENSG00000169231;MTX1_ENSG00000173171                                                              |
| 1 | 1.6E+08 | 1.6E+08 | KD2-H4K8la_peak_398 | 8.47421  | SCAMP3_ENSG00000116521                                                                                  |
| 1 | 1.6E+08 | 1.6E+08 | KD2-H4K8la_peak_399 | 6.29651  | FDPS_ENSG00000160752                                                                                    |
| 1 | 1.6E+08 | 1.6E+08 | KD2-H4K8la_peak_400 | 5.43278  |                                                                                                         |
| 1 | 1.6E+08 | 1.6E+08 | KD2-H4K8la_peak_401 | 8.27596  | RXFP4_ENSG00000173080                                                                                   |
| 1 | 1.6E+08 | 1.6E+08 | KD2-H4K8la_peak_402 | 5.99671  | RXFP4_ENSG00000173080                                                                                   |
| 1 | 1.6E+08 | 1.6E+08 | KD2-H4K8la_peak_403 | 8.39919  | SSR2_ENSG00000163479                                                                                    |
| 1 | 1.6E+08 | 1.6E+08 | KD2-H4K8la_peak_404 | 14.15376 | UBQLN4_ENSG00000160803;LAMTOR2_ENSG00000116586                                                          |
| 1 | 1.6E+08 | 1.6E+08 | KD2-H4K8la_peak_405 | 8.66164  | LAMTOR2_ENSG00000116586                                                                                 |
| 1 | 1.6E+08 | 1.6E+08 | KD2-H4K8la_peak_406 | 9.77334  | MEX3A_ENSG00000254726;LMNA_ENSG00000160789                                                              |
| 1 | 1.6E+08 | 1.6E+08 | KD2-H4K8la_peak_407 | 8.48488  | MEX3A_ENSG00000254726;LMNA_ENSG00000160789                                                              |
| 1 | 1.6E+08 | 1.6E+08 | KD2-H4K8la_peak_408 | 6.56022  | MEX3A_ENSG00000254726;LMNA_ENSG00000160789                                                              |
| 1 | 1.6E+08 | 1.6E+08 | KD2-H4K8la_peak_409 | 7.35976  |                                                                                                         |
| 1 | 1.6E+08 | 1.6E+08 | KD2-H4K8la_peak_410 | 6.69137  | PAQR6_ENSG00000160781                                                                                   |
| 1 | 1.6E+08 | 1.6E+08 | KD2-H4K8la_peak_411 | 4.6555   | TSACC_ENSG00000163467                                                                                   |
| 1 | 1.6E+08 | 1.6E+08 | KD2-H4K8la_peak_412 | 8.95597  |                                                                                                         |

|   |         |         |                     |          |                                                    |
|---|---------|---------|---------------------|----------|----------------------------------------------------|
| 1 | 1.6E+08 | 1.6E+08 | KD2-H4K8la_peak_413 | 6.02599  | MIR9-1_ENSG00000207933                             |
| 1 | 1.6E+08 | 1.6E+08 | KD2-H4K8la_peak_414 | 6.78512  |                                                    |
| 1 | 1.6E+08 | 1.6E+08 | KD2-H4K8la_peak_415 | 5.33301  |                                                    |
| 1 | 1.6E+08 | 1.6E+08 | KD2-H4K8la_peak_416 | 7.77341  | RP11-98G7.1_ENSG00000236947                        |
| 1 | 1.6E+08 | 1.6E+08 | KD2-H4K8la_peak_417 | 14.89556 | RP11-98G7.1_ENSG00000236947                        |
| 1 | 1.6E+08 | 1.6E+08 | KD2-H4K8la_peak_418 | 11.68081 | RP11-66D17.3_ENSG00000237588                       |
| 1 | 1.6E+08 | 1.6E+08 | KD2-H4K8la_peak_419 | 9.40293  | CRABP2_ENSG00000143320                             |
| 1 | 1.6E+08 | 1.6E+08 | KD2-H4K8la_peak_420 | 6.4136   | CRABP2_ENSG00000143320                             |
| 1 | 1.6E+08 | 1.6E+08 | KD2-H4K8la_peak_421 | 13.60057 |                                                    |
| 1 | 1.6E+08 | 1.6E+08 | KD2-H4K8la_peak_422 | 7.49897  | MRPL24_ENSG00000143314                             |
| 1 | 1.6E+08 | 1.6E+08 | KD2-H4K8la_peak_423 | 7.61975  |                                                    |
| 1 | 1.6E+08 | 1.6E+08 | KD2-H4K8la_peak_424 | 11.92959 | PRCC_ENSG00000143294                               |
| 1 | 1.6E+08 | 1.6E+08 | KD2-H4K8la_peak_425 | 9.77334  | HDGF_ENSG00000143321                               |
| 1 | 1.6E+08 | 1.6E+08 | KD2-H4K8la_peak_426 | 8.21187  | INSRR_ENSG00000027644                              |
| 1 | 1.6E+08 | 1.6E+08 | KD2-H4K8la_peak_427 | 5.29561  |                                                    |
| 1 | 1.6E+08 | 1.6E+08 | KD2-H4K8la_peak_428 | 8.84474  | ARHGEF11_ENSG00000132694                           |
| 1 | 1.6E+08 | 1.6E+08 | KD2-H4K8la_peak_429 | 7.13237  |                                                    |
| 1 | 1.6E+08 | 1.6E+08 | KD2-H4K8la_peak_430 | 9.98668  |                                                    |
| 1 | 1.6E+08 | 1.6E+08 | KD2-H4K8la_peak_431 | 13.13367 | RP11-574F21.2_ENSG00000228606                      |
| 1 | 1.6E+08 | 1.6E+08 | KD2-H4K8la_peak_432 | 5.28047  |                                                    |
| 1 | 1.6E+08 | 1.6E+08 | KD2-H4K8la_peak_433 | 14.44261 | DCAF8_ENSG00000132716;DCAF8_ENSG00000258465        |
| 1 | 1.6E+08 | 1.6E+08 | KD2-H4K8la_peak_434 | 4.75945  | COPA_ENSG00000122218;NCSTN_ENSG00000162736         |
| 1 | 1.6E+08 | 1.6E+08 | KD2-H4K8la_peak_435 | 6.40658  | KLHDC9_ENSG00000162755                             |
| 1 | 1.6E+08 | 1.6E+08 | KD2-H4K8la_peak_436 | 6.09539  | UFC1_ENSG00000143222                               |
| 1 | 1.6E+08 | 1.6E+08 | KD2-H4K8la_peak_437 | 5.90392  |                                                    |
| 1 | 1.6E+08 | 1.6E+08 | KD2-H4K8la_peak_438 | 8.48577  | RP11-297K8.2_ENSG00000224985;USP21_ENSG00000143258 |
| 1 | 1.6E+08 | 1.6E+08 | KD2-H4K8la_peak_439 | 6.86458  | B4GALT3_ENSG00000158850                            |
| 1 | 1.6E+08 | 1.6E+08 | KD2-H4K8la_peak_440 | 7.16303  | NDUFS2_ENSG00000158864;ADAMTS4_ENSG00000158859     |
| 1 | 1.6E+08 | 1.6E+08 | KD2-H4K8la_peak_441 | 8.0333   |                                                    |
| 1 | 1.6E+08 | 1.6E+08 | KD2-H4K8la_peak_442 | 5.94474  |                                                    |
| 1 | 1.6E+08 | 1.6E+08 | KD2-H4K8la_peak_443 | 5.6499   |                                                    |
| 1 | 1.6E+08 | 1.6E+08 | KD2-H4K8la_peak_444 | 7.9076   | SDHC_ENSG00000143252                               |
| 1 | 1.6E+08 | 1.6E+08 | KD2-H4K8la_peak_445 | 7.61975  | SDHC_ENSG00000143252                               |
| 1 | 1.6E+08 | 1.6E+08 | KD2-H4K8la_peak_446 | 10.04113 |                                                    |
| 1 | 1.6E+08 | 1.6E+08 | KD2-H4K8la_peak_447 | 12.32641 |                                                    |
| 1 | 1.6E+08 | 1.6E+08 | KD2-H4K8la_peak_448 | 15.63685 |                                                    |
| 1 | 1.6E+08 | 1.6E+08 | KD2-H4K8la_peak_449 | 8.3497   |                                                    |
| 1 | 1.6E+08 | 1.6E+08 | KD2-H4K8la_peak_450 | 9.61894  | UHMK1_ENSG00000152332                              |
| 1 | 1.6E+08 | 1.6E+08 | KD2-H4K8la_peak_451 | 8.89364  |                                                    |
| 1 | 1.6E+08 | 1.6E+08 | KD2-H4K8la_peak_452 | 7.3993   |                                                    |
| 1 | 1.6E+08 | 1.6E+08 | KD2-H4K8la_peak_453 | 10.70284 |                                                    |
| 1 | 1.6E+08 | 1.6E+08 | KD2-H4K8la_peak_454 | 7.68525  |                                                    |
| 1 | 1.6E+08 | 1.6E+08 | KD2-H4K8la_peak_455 | 11.15747 |                                                    |
| 1 | 1.6E+08 | 1.6E+08 | KD2-H4K8la_peak_456 | 9.27415  |                                                    |
| 1 | 1.7E+08 | 1.7E+08 | KD2-H4K8la_peak_457 | 11.40266 | TMCO1_ENSG00000143183;UCK2_ENSG00000143179         |
| 1 | 1.7E+08 | 1.7E+08 | KD2-H4K8la_peak_458 | 5.18385  |                                                    |

|   |         |         |                     |          |                                                      |
|---|---------|---------|---------------------|----------|------------------------------------------------------|
| 1 | 1.7E+08 | 1.7E+08 | KD2-H4K8la_peak_459 | 5.78071  |                                                      |
| 1 | 1.7E+08 | 1.7E+08 | KD2-H4K8la_peak_460 | 8.37064  | KLHL20_ENSG00000076321                               |
| 1 | 1.7E+08 | 1.7E+08 | KD2-H4K8la_peak_461 | 6.13507  | RC3H1_ENSG00000135870;RP11-160H22.3_ENSG00000224977  |
| 1 | 1.7E+08 | 1.7E+08 | KD2-H4K8la_peak_462 | 6.98743  | CACYBP_ENSG00000116161                               |
| 1 | 1.7E+08 | 1.7E+08 | KD2-H4K8la_peak_463 | 5.33301  |                                                      |
| 1 | 1.7E+08 | 1.7E+08 | KD2-H4K8la_peak_464 | 8.06229  | MRPS14_ENSG00000120333                               |
| 1 | 1.8E+08 | 1.8E+08 | KD2-H4K8la_peak_465 | 18.26015 | C1orf220_ENSG00000213057;C1ORF220_ENSG00000184909    |
| 1 | 1.8E+08 | 1.8E+08 | KD2-H4K8la_peak_466 | 8.76116  |                                                      |
| 1 | 1.8E+08 | 1.8E+08 | KD2-H4K8la_peak_467 | 5.45079  |                                                      |
| 1 | 1.8E+08 | 1.8E+08 | KD2-H4K8la_peak_468 | 6.4136   | TDRD5_ENSG00000162782                                |
| 1 | 1.8E+08 | 1.8E+08 | KD2-H4K8la_peak_469 | 11.42932 | FAM163A_ENSG00000143340                              |
| 1 | 1.8E+08 | 1.8E+08 | KD2-H4K8la_peak_470 | 10.04397 |                                                      |
| 1 | 1.8E+08 | 1.8E+08 | KD2-H4K8la_peak_471 | 10.49982 |                                                      |
| 1 | 1.8E+08 | 1.8E+08 | KD2-H4K8la_peak_472 | 6.57176  |                                                      |
| 1 | 1.8E+08 | 1.8E+08 | KD2-H4K8la_peak_473 | 9.06396  |                                                      |
| 1 | 1.8E+08 | 1.8E+08 | KD2-H4K8la_peak_474 | 12.55003 |                                                      |
| 1 | 1.8E+08 | 1.8E+08 | KD2-H4K8la_peak_475 | 12.44878 |                                                      |
| 1 | 1.8E+08 | 1.8E+08 | KD2-H4K8la_peak_476 | 12.05405 |                                                      |
| 1 | 1.8E+08 | 1.8E+08 | KD2-H4K8la_peak_477 | 5.33301  |                                                      |
| 1 | 1.8E+08 | 1.8E+08 | KD2-H4K8la_peak_478 | 9.67249  |                                                      |
| 1 | 1.8E+08 | 1.8E+08 | KD2-H4K8la_peak_479 | 7.12014  |                                                      |
| 1 | 1.8E+08 | 1.8E+08 | KD2-H4K8la_peak_480 | 11.7362  |                                                      |
| 1 | 1.8E+08 | 1.8E+08 | KD2-H4K8la_peak_481 | 15.08271 |                                                      |
| 1 | 1.8E+08 | 1.8E+08 | KD2-H4K8la_peak_482 | 12.12477 | RP11-317P15.4_ENSG00000261504                        |
| 1 | 1.8E+08 | 1.8E+08 | KD2-H4K8la_peak_483 | 4.30663  |                                                      |
| 1 | 1.8E+08 | 1.8E+08 | KD2-H4K8la_peak_484 | 5.28047  | DHX9_ENSG00000135829                                 |
| 1 | 1.8E+08 | 1.8E+08 | KD2-H4K8la_peak_485 | 10.47118 | LAMC1_ENSG00000135862                                |
| 1 | 1.8E+08 | 1.8E+08 | KD2-H4K8la_peak_486 | 14.23294 | SMG7-AS1_ENSG00000232860;SMG7_ENSG00000116698        |
| 1 | 1.8E+08 | 1.8E+08 | KD2-H4K8la_peak_487 | 8.13557  | SMG7-AS1_ENSG00000232860;SMG7_ENSG00000116698        |
| 1 | 1.8E+08 | 1.8E+08 | KD2-H4K8la_peak_488 | 5.33301  | COLGALT2_ENSG00000198756                             |
| 1 | 1.9E+08 | 1.9E+08 | KD2-H4K8la_peak_489 | 5.84082  | RNF2_ENSG00000121481                                 |
| 1 | 1.9E+08 | 1.9E+08 | KD2-H4K8la_peak_490 | 18.22154 | TRMT1L_ENSG00000121486;SWT1_ENSG00000116668          |
| 1 | 1.9E+08 | 1.9E+08 | KD2-H4K8la_peak_491 | 6.86458  | IVNS1ABP_ENSG00000116679                             |
| 1 | 1.9E+08 | 1.9E+08 | KD2-H4K8la_peak_492 | 5.90392  | IVNS1ABP_ENSG00000116679;GS1-279B7.2_ENSG00000273004 |
| 1 | 1.9E+08 | 1.9E+08 | KD2-H4K8la_peak_493 | 9.66714  | CDC73_ENSG00000134371                                |
| 1 | 2E+08   | 2E+08   | KD2-H4K8la_peak_494 | 4.30663  |                                                      |
| 1 | 2E+08   | 2E+08   | KD2-H4K8la_peak_495 | 6.2278   | AL450244.1_ENSG00000263805                           |
| 1 | 2E+08   | 2E+08   | KD2-H4K8la_peak_496 | 6.59654  | ZNF281_ENSG00000162702                               |
| 1 | 2E+08   | 2E+08   | KD2-H4K8la_peak_497 | 7.61975  | DDX59_ENSG00000118197;RP11-92G12.3_ENSG00000260088   |
| 1 | 2E+08   | 2E+08   | KD2-H4K8la_peak_498 | 6.68593  | CAMSAP2_ENSG00000118200                              |
| 1 | 2E+08   | 2E+08   | KD2-H4K8la_peak_499 | 9.87983  |                                                      |
| 1 | 2E+08   | 2E+08   | KD2-H4K8la_peak_500 | 8.73956  |                                                      |
| 1 | 2E+08   | 2E+08   | KD2-H4K8la_peak_501 | 5.58883  |                                                      |
| 1 | 2E+08   | 2E+08   | KD2-H4K8la_peak_502 | 8.84474  |                                                      |
| 1 | 2E+08   | 2E+08   | KD2-H4K8la_peak_503 | 11.40266 | SHISA4_ENSG00000198892                               |
| 1 | 2E+08   | 2E+08   | KD2-H4K8la_peak_504 | 7.69026  | SHISA4_ENSG00000198892                               |

|   |         |         |                     |          |                                                      |
|---|---------|---------|---------------------|----------|------------------------------------------------------|
| 1 | 2E+08   | 2E+08   | KD2-H4K8la_peak_505 | 13.47548 | TIMM17A_ENSG00000134375                              |
| 1 | 2E+08   | 2E+08   | KD2-H4K8la_peak_506 | 12.72886 | RNPEP_ENSG00000176393                                |
| 1 | 2E+08   | 2E+08   | KD2-H4K8la_peak_507 | 8.0333   | ARL8A_ENSG00000143862                                |
| 1 | 2E+08   | 2E+08   | KD2-H4K8la_peak_508 | 6.40658  | ARL8A_ENSG00000143862                                |
| 1 | 2E+08   | 2E+08   | KD2-H4K8la_peak_509 | 7.90495  |                                                      |
| 1 | 2E+08   | 2E+08   | KD2-H4K8la_peak_510 | 7.36635  |                                                      |
| 1 | 2E+08   | 2E+08   | KD2-H4K8la_peak_511 | 5.58883  |                                                      |
| 1 | 2E+08   | 2E+08   | KD2-H4K8la_peak_512 | 8.48488  |                                                      |
| 1 | 2E+08   | 2E+08   | KD2-H4K8la_peak_513 | 8.16916  | RP11-480I12.10_ENSG00000260021;PCAT6_ENSG00000228288 |
| 1 | 2E+08   | 2E+08   | KD2-H4K8la_peak_514 | 12.19151 | KLHL12_ENSG00000117153                               |
| 1 | 2E+08   | 2E+08   | KD2-H4K8la_peak_515 | 14.44261 | ADIPOR1_ENSG00000159346                              |
| 1 | 2E+08   | 2E+08   | KD2-H4K8la_peak_516 | 9.61894  | CYB5R1_ENSG00000159348                               |
| 1 | 2E+08   | 2E+08   | KD2-H4K8la_peak_517 | 5.28047  |                                                      |
| 1 | 2E+08   | 2E+08   | KD2-H4K8la_peak_518 | 5.27164  |                                                      |
| 1 | 2E+08   | 2E+08   | KD2-H4K8la_peak_519 | 8.89364  |                                                      |
| 1 | 2E+08   | 2E+08   | KD2-H4K8la_peak_520 | 8.00843  |                                                      |
| 1 | 2E+08   | 2E+08   | KD2-H4K8la_peak_521 | 6.93796  |                                                      |
| 1 | 2E+08   | 2E+08   | KD2-H4K8la_peak_522 | 9.01952  | SNRPE_ENSG00000182004                                |
| 1 | 2E+08   | 2E+08   | KD2-H4K8la_peak_523 | 8.31696  |                                                      |
| 1 | 2E+08   | 2E+08   | KD2-H4K8la_peak_524 | 8.76116  |                                                      |
| 1 | 2E+08   | 2E+08   | KD2-H4K8la_peak_525 | 6.20477  | ETNK2_ENSG00000143845                                |
| 1 | 2E+08   | 2E+08   | KD2-H4K8la_peak_526 | 7.3993   |                                                      |
| 1 | 2E+08   | 2E+08   | KD2-H4K8la_peak_527 | 6.3399   |                                                      |
| 1 | 2E+08   | 2E+08   | KD2-H4K8la_peak_528 | 8.50453  |                                                      |
| 1 | 2E+08   | 2E+08   | KD2-H4K8la_peak_529 | 7.49458  | PIK3C2B_ENSG00000133056                              |
| 1 | 2E+08   | 2E+08   | KD2-H4K8la_peak_530 | 11.7362  | MDM4_ENSG00000198625                                 |
| 1 | 2.1E+08 | 2.1E+08 | KD2-H4K8la_peak_531 | 6.56022  |                                                      |
| 1 | 2.1E+08 | 2.1E+08 | KD2-H4K8la_peak_532 | 14.96976 | AL583832.1_ENSG00000251696                           |
| 1 | 2.1E+08 | 2.1E+08 | KD2-H4K8la_peak_533 | 13.18253 |                                                      |
| 1 | 2.1E+08 | 2.1E+08 | KD2-H4K8la_peak_534 | 5.43354  |                                                      |
| 1 | 2.1E+08 | 2.1E+08 | KD2-H4K8la_peak_535 | 7.65547  |                                                      |
| 1 | 2.1E+08 | 2.1E+08 | KD2-H4K8la_peak_536 | 14.25411 | ELK4_ENSG00000158711                                 |
| 1 | 2.1E+08 | 2.1E+08 | KD2-H4K8la_peak_537 | 7.30722  | SLC45A3_ENSG00000158715                              |
| 1 | 2.1E+08 | 2.1E+08 | KD2-H4K8la_peak_538 | 8.4237   |                                                      |
| 1 | 2.1E+08 | 2.1E+08 | KD2-H4K8la_peak_539 | 10.31182 | C1orf132_ENSG00000203709                             |
| 1 | 2.1E+08 | 2.1E+08 | KD2-H4K8la_peak_540 | 12.93869 |                                                      |
| 1 | 2.1E+08 | 2.1E+08 | KD2-H4K8la_peak_541 | 6.35646  |                                                      |
| 1 | 2.1E+08 | 2.1E+08 | KD2-H4K8la_peak_542 | 4.98386  |                                                      |
| 1 | 2.1E+08 | 2.1E+08 | KD2-H4K8la_peak_543 | 5.09794  |                                                      |
| 1 | 2.1E+08 | 2.1E+08 | KD2-H4K8la_peak_544 | 7.12014  |                                                      |
| 1 | 2.1E+08 | 2.1E+08 | KD2-H4K8la_peak_545 | 8.03267  | C1orf74_ENSG00000162757                              |
| 1 | 2.1E+08 | 2.1E+08 | KD2-H4K8la_peak_546 | 7.12014  | SYT14_ENSG00000143469                                |
| 1 | 2.1E+08 | 2.1E+08 | KD2-H4K8la_peak_547 | 12.97817 | SERTAD4-AS1_ENSG00000203706;SERTAD4_ENSG00000082497  |
| 1 | 2.1E+08 | 2.1E+08 | KD2-H4K8la_peak_548 | 13.05299 |                                                      |
| 1 | 2.1E+08 | 2.1E+08 | KD2-H4K8la_peak_549 | 4.75945  |                                                      |
| 1 | 2.1E+08 | 2.1E+08 | KD2-H4K8la_peak_550 | 8.84265  | RP11-359E8.3_ENSG00000223649                         |

|   |         |         |                     |          |                                                      |
|---|---------|---------|---------------------|----------|------------------------------------------------------|
| 1 | 2.1E+08 | 2.1E+08 | KD2-H4K8la_peak_551 | 6.68593  |                                                      |
| 1 | 2.1E+08 | 2.1E+08 | KD2-H4K8la_peak_552 | 14.15376 | RP11-354K1.2_ENSG00000228792                         |
| 1 | 2.1E+08 | 2.1E+08 | KD2-H4K8la_peak_553 | 5.84385  | LPGAT1_ENSG00000123684;RP11-552D8.1_ENSG00000229258  |
| 1 | 2.1E+08 | 2.1E+08 | KD2-H4K8la_peak_554 | 7.79412  | TMEM206_ENSG00000065600                              |
| 1 | 2.1E+08 | 2.1E+08 | KD2-H4K8la_peak_555 | 5.33301  | NENF_ENSG00000117691                                 |
| 1 | 2.1E+08 | 2.1E+08 | KD2-H4K8la_peak_556 | 10.66741 | RP11-61J19.4_ENSG00000260805                         |
| 1 | 2.1E+08 | 2.1E+08 | KD2-H4K8la_peak_557 | 11.36807 |                                                      |
| 1 | 2.1E+08 | 2.1E+08 | KD2-H4K8la_peak_558 | 10.27876 | NSL1_ENSG00000117697;TATDN3_ENSG00000203705          |
| 1 | 2.1E+08 | 2.1E+08 | KD2-H4K8la_peak_559 | 6.77116  | FLVCR1-AS1_ENSG00000198468;FLVCR1_ENSG00000162769    |
| 1 | 2.1E+08 | 2.1E+08 | KD2-H4K8la_peak_560 | 6.2278   |                                                      |
| 1 | 2.1E+08 | 2.1E+08 | KD2-H4K8la_peak_561 | 4.6555   | RPS6KC1_ENSG00000136643                              |
| 1 | 2.1E+08 | 2.1E+08 | KD2-H4K8la_peak_562 | 6.93796  | RPS6KC1_ENSG00000136643                              |
| 1 | 2.1E+08 | 2.1E+08 | KD2-H4K8la_peak_563 | 11.02635 |                                                      |
| 1 | 2.1E+08 | 2.1E+08 | KD2-H4K8la_peak_564 | 13.04837 | PROX1_ENSG00000117707                                |
| 1 | 2.1E+08 | 2.1E+08 | KD2-H4K8la_peak_565 | 6.64804  |                                                      |
| 1 | 2.1E+08 | 2.1E+08 | KD2-H4K8la_peak_566 | 13.04837 | SMYD2_ENSG00000143499                                |
| 1 | 2.1E+08 | 2.1E+08 | KD2-H4K8la_peak_567 | 8.7731   | PTPN14_ENSG00000152104                               |
| 1 | 2.2E+08 | 2.2E+08 | KD2-H4K8la_peak_568 | 8.07102  |                                                      |
| 1 | 2.2E+08 | 2.2E+08 | KD2-H4K8la_peak_569 | 9.92519  | GPATCH2_ENSG00000092978;SPATA17_ENSG00000162814      |
| 1 | 2.2E+08 | 2.2E+08 | KD2-H4K8la_peak_570 | 13.38201 | RRP15_ENSG00000067533                                |
| 1 | 2.2E+08 | 2.2E+08 | KD2-H4K8la_peak_571 | 9.72904  |                                                      |
| 1 | 2.2E+08 | 2.2E+08 | KD2-H4K8la_peak_572 | 6.64804  | RP11-135J2.4_ENSG00000228063;LYPLAL1_ENSG00000143353 |
| 1 | 2.2E+08 | 2.2E+08 | KD2-H4K8la_peak_573 | 5.22418  | EPRS_ENSG00000136628                                 |
| 1 | 2.2E+08 | 2.2E+08 | KD2-H4K8la_peak_574 | 6.20793  | RAB3GAP2_ENSG00000118873                             |
| 1 | 2.2E+08 | 2.2E+08 | KD2-H4K8la_peak_575 | 9.99681  | MARK1_ENSG00000116141                                |
| 1 | 2.2E+08 | 2.2E+08 | KD2-H4K8la_peak_576 | 7.84781  | MARK1_ENSG00000116141                                |
| 1 | 2.2E+08 | 2.2E+08 | KD2-H4K8la_peak_577 | 7.34033  |                                                      |
| 1 | 2.2E+08 | 2.2E+08 | KD2-H4K8la_peak_578 | 8.77936  |                                                      |
| 1 | 2.2E+08 | 2.2E+08 | KD2-H4K8la_peak_579 | 7.12014  | TAF1A_ENSG00000143498;RP11-378J18.3_ENSG00000225265  |
| 1 | 2.2E+08 | 2.2E+08 | KD2-H4K8la_peak_580 | 11.81269 | RP11-452F19.3_ENSG00000228106;DISP1_ENSG00000154309  |
| 1 | 2.2E+08 | 2.2E+08 | KD2-H4K8la_peak_581 | 5.47284  |                                                      |
| 1 | 2.2E+08 | 2.2E+08 | KD2-H4K8la_peak_582 | 6.27787  | TLR5_ENSG00000187554                                 |
| 1 | 2.2E+08 | 2.2E+08 | KD2-H4K8la_peak_583 | 4.94771  |                                                      |
| 1 | 2.2E+08 | 2.2E+08 | KD2-H4K8la_peak_584 | 10.92814 | FBXO28_ENSG00000143756                               |
| 1 | 2.2E+08 | 2.2E+08 | KD2-H4K8la_peak_585 | 4.68264  |                                                      |
| 1 | 2.3E+08 | 2.3E+08 | KD2-H4K8la_peak_586 | 9.61894  | ENAH_ENSG00000154380                                 |
| 1 | 2.3E+08 | 2.3E+08 | KD2-H4K8la_peak_587 | 12.14568 | ENAH_ENSG00000154380                                 |
| 1 | 2.3E+08 | 2.3E+08 | KD2-H4K8la_peak_588 | 4.68264  | TMEM63A_ENSG00000196187                              |
| 1 | 2.3E+08 | 2.3E+08 | KD2-H4K8la_peak_589 | 4.7932   | RP4-559A3.7_ENSG00000255835;PYCR2_ENSG00000143811    |
| 1 | 2.3E+08 | 2.3E+08 | KD2-H4K8la_peak_590 | 5.99671  | RP4-559A3.7_ENSG00000255835;PYCR2_ENSG00000143811    |
| 1 | 2.3E+08 | 2.3E+08 | KD2-H4K8la_peak_591 | 10.66741 | SDE2_ENSG00000143751                                 |
| 1 | 2.3E+08 | 2.3E+08 | KD2-H4K8la_peak_592 | 7.3993   | RP11-396C23.4_ENSG00000272562;H3F3A_ENSG00000163041  |
| 1 | 2.3E+08 | 2.3E+08 | KD2-H4K8la_peak_593 | 9.41838  |                                                      |
| 1 | 2.3E+08 | 2.3E+08 | KD2-H4K8la_peak_594 | 17.08706 |                                                      |
| 1 | 2.3E+08 | 2.3E+08 | KD2-H4K8la_peak_595 | 11.84538 | ACBD3_ENSG00000182827                                |
| 1 | 2.3E+08 | 2.3E+08 | KD2-H4K8la_peak_596 | 7.0396   | ACBD3_ENSG00000182827                                |

|   |         |         |                     |          |                                                                                 |
|---|---------|---------|---------------------|----------|---------------------------------------------------------------------------------|
| 1 | 2.3E+08 | 2.3E+08 | KD2-H4K8la_peak_597 | 10.66741 | LIN9_ENSG00000183814                                                            |
| 1 | 2.3E+08 | 2.3E+08 | KD2-H4K8la_peak_598 | 9.20163  | LIN9_ENSG00000183814                                                            |
| 1 | 2.3E+08 | 2.3E+08 | KD2-H4K8la_peak_599 | 6.53067  |                                                                                 |
| 1 | 2.3E+08 | 2.3E+08 | KD2-H4K8la_peak_600 | 5.43278  |                                                                                 |
| 1 | 2.3E+08 | 2.3E+08 | KD2-H4K8la_peak_601 | 13.34201 |                                                                                 |
| 1 | 2.3E+08 | 2.3E+08 | KD2-H4K8la_peak_602 | 12.12151 | ZNF678_ENSG00000181450                                                          |
| 1 | 2.3E+08 | 2.3E+08 | KD2-H4K8la_peak_603 | 7.12014  | SNAP47_ENSG00000143740                                                          |
| 1 | 2.3E+08 | 2.3E+08 | KD2-H4K8la_peak_604 | 5.23773  |                                                                                 |
| 1 | 2.3E+08 | 2.3E+08 | KD2-H4K8la_peak_605 | 12.97817 |                                                                                 |
| 1 | 2.3E+08 | 2.3E+08 | KD2-H4K8la_peak_606 | 7.68525  | ARF1_ENSG00000143761                                                            |
| 1 | 2.3E+08 | 2.3E+08 | KD2-H4K8la_peak_607 | 9.58134  | MRPL55_ENSG00000162910                                                          |
| 1 | 2.3E+08 | 2.3E+08 | KD2-H4K8la_peak_608 | 7.85888  | GUK1_ENSG00000143774                                                            |
| 1 | 2.3E+08 | 2.3E+08 | KD2-H4K8la_peak_609 | 4.32503  | GUK1_ENSG00000143774                                                            |
| 1 | 2.3E+08 | 2.3E+08 | KD2-H4K8la_peak_610 | 5.67596  |                                                                                 |
| 1 | 2.3E+08 | 2.3E+08 | KD2-H4K8la_peak_611 | 8.1293   |                                                                                 |
| 1 | 2.3E+08 | 2.3E+08 | KD2-H4K8la_peak_612 | 4.6555   |                                                                                 |
| 1 | 2.3E+08 | 2.3E+08 | KD2-H4K8la_peak_613 | 8.89364  |                                                                                 |
| 1 | 2.3E+08 | 2.3E+08 | KD2-H4K8la_peak_614 | 5.22418  | RP5-956O18.2_ENSG00000227006                                                    |
| 1 | 2.3E+08 | 2.3E+08 | KD2-H4K8la_peak_615 | 8.00843  | RP5-956O18.3_ENSG00000224407                                                    |
| 1 | 2.3E+08 | 2.3E+08 | KD2-H4K8la_peak_616 | 7.3993   | COG2_ENSG00000135775                                                            |
| 1 | 2.3E+08 | 2.3E+08 | KD2-H4K8la_peak_617 | 7.49467  | RP11-295G20.2_ENSG00000233461;TSNAX-DISC1_ENSG00000270106;TSNAX_ENSG00000116918 |
| 1 | 2.3E+08 | 2.3E+08 | KD2-H4K8la_peak_618 | 6.35646  | MAP10_ENSG00000212916                                                           |
| 1 | 2.3E+08 | 2.3E+08 | KD2-H4K8la_peak_619 | 9.67249  |                                                                                 |
| 1 | 2.3E+08 | 2.3E+08 | KD2-H4K8la_peak_620 | 8.24908  | SLC35F3_ENSG00000183780                                                         |
| 1 | 2.3E+08 | 2.3E+08 | KD2-H4K8la_peak_621 | 7.67081  |                                                                                 |
| 1 | 2.3E+08 | 2.3E+08 | KD2-H4K8la_peak_622 | 5.33301  | RP5-827C21.4_ENSG00000231663;COA6_ENSG00000168275                               |
| 1 | 2.3E+08 | 2.3E+08 | KD2-H4K8la_peak_623 | 4.6555   | TARBPI_ENSG00000059588                                                          |
| 1 | 2.3E+08 | 2.3E+08 | KD2-H4K8la_peak_624 | 5.43278  |                                                                                 |
| 1 | 2.3E+08 | 2.3E+08 | KD2-H4K8la_peak_625 | 7.30722  |                                                                                 |
| 1 | 2.3E+08 | 2.3E+08 | KD2-H4K8la_peak_626 | 9.52146  |                                                                                 |
| 1 | 2.3E+08 | 2.3E+08 | KD2-H4K8la_peak_627 | 10.20357 |                                                                                 |
| 1 | 2.3E+08 | 2.3E+08 | KD2-H4K8la_peak_628 | 10.20357 |                                                                                 |
| 1 | 2.3E+08 | 2.3E+08 | KD2-H4K8la_peak_629 | 10.50811 |                                                                                 |
| 1 | 2.3E+08 | 2.3E+08 | KD2-H4K8la_peak_630 | 5.27164  |                                                                                 |
| 1 | 2.4E+08 | 2.4E+08 | KD2-H4K8la_peak_631 | 8.13557  | TOMM20_ENSG00000173726                                                          |
| 1 | 2.4E+08 | 2.4E+08 | KD2-H4K8la_peak_632 | 8.89364  |                                                                                 |
| 1 | 2.4E+08 | 2.4E+08 | KD2-H4K8la_peak_633 | 6.13507  |                                                                                 |
| 1 | 2.4E+08 | 2.4E+08 | KD2-H4K8la_peak_634 | 5.99671  |                                                                                 |
| 1 | 2.4E+08 | 2.4E+08 | KD2-H4K8la_peak_635 | 9.37943  |                                                                                 |
| 1 | 2.4E+08 | 2.4E+08 | KD2-H4K8la_peak_636 | 9.61894  | LGALS8-AS1_ENSG00000223776                                                      |
| 1 | 2.4E+08 | 2.4E+08 | KD2-H4K8la_peak_637 | 12.77989 |                                                                                 |
| 1 | 2.4E+08 | 2.4E+08 | KD2-H4K8la_peak_638 | 7.51014  |                                                                                 |
| 1 | 2.4E+08 | 2.4E+08 | KD2-H4K8la_peak_639 | 7.41438  |                                                                                 |
| 1 | 2.4E+08 | 2.4E+08 | KD2-H4K8la_peak_640 | 7.13528  |                                                                                 |
| 1 | 2.4E+08 | 2.4E+08 | KD2-H4K8la_peak_641 | 8.37064  |                                                                                 |
| 1 | 2.4E+08 | 2.4E+08 | KD2-H4K8la_peak_642 | 7.11805  |                                                                                 |

|    |         |         |                     |          |                                                     |
|----|---------|---------|---------------------|----------|-----------------------------------------------------|
| 1  | 2.4E+08 | 2.4E+08 | KD2-H4K8la_peak_643 | 7.61975  |                                                     |
| 1  | 2.4E+08 | 2.4E+08 | KD2-H4K8la_peak_644 | 7.61975  |                                                     |
| 1  | 2.4E+08 | 2.4E+08 | KD2-H4K8la_peak_645 | 7.06586  |                                                     |
| 1  | 2.4E+08 | 2.4E+08 | KD2-H4K8la_peak_646 | 9.40293  | RP11-527D7.1_ENSG00000225554                        |
| 1  | 2.4E+08 | 2.4E+08 | KD2-H4K8la_peak_647 | 7.12014  |                                                     |
| 1  | 2.4E+08 | 2.4E+08 | KD2-H4K8la_peak_648 | 6.13507  |                                                     |
| 1  | 2.4E+08 | 2.4E+08 | KD2-H4K8la_peak_649 | 5.33301  |                                                     |
| 1  | 2.4E+08 | 2.4E+08 | KD2-H4K8la_peak_650 | 11.44218 |                                                     |
| 1  | 2.4E+08 | 2.4E+08 | KD2-H4K8la_peak_651 | 14.07018 | RP11-278H7.1_ENSG00000226828                        |
| 1  | 2.4E+08 | 2.4E+08 | KD2-H4K8la_peak_652 | 9.19451  |                                                     |
| 1  | 2.4E+08 | 2.4E+08 | KD2-H4K8la_peak_653 | 5.83285  |                                                     |
| 1  | 2.5E+08 | 2.5E+08 | KD2-H4K8la_peak_654 | 10.16316 | HNRNPU_ENSG00000153187;RP11-11N7.4_ENSG00000273175  |
| 1  | 2.5E+08 | 2.5E+08 | KD2-H4K8la_peak_655 | 6.82292  |                                                     |
| 1  | 2.5E+08 | 2.5E+08 | KD2-H4K8la_peak_656 | 10.02595 | RP11-156E8.1_ENSG00000272195;EFCAB2_ENSG00000203666 |
| 1  | 2.5E+08 | 2.5E+08 | KD2-H4K8la_peak_657 | 5.24027  | KIF26B_ENSG00000162849                              |
| 1  | 2.5E+08 | 2.5E+08 | KD2-H4K8la_peak_658 | 8.66164  |                                                     |
| 1  | 2.5E+08 | 2.5E+08 | KD2-H4K8la_peak_659 | 13.03265 |                                                     |
| 1  | 2.5E+08 | 2.5E+08 | KD2-H4K8la_peak_660 | 5.27164  | RP11-522M21.2_ENSG00000238224                       |
| 1  | 2.5E+08 | 2.5E+08 | KD2-H4K8la_peak_661 | 4.86896  |                                                     |
| 1  | 2.5E+08 | 2.5E+08 | KD2-H4K8la_peak_662 | 7.49467  |                                                     |
| 1  | 2.5E+08 | 2.5E+08 | KD2-H4K8la_peak_663 | 10.27876 | SCCPDH_ENSG00000143653                              |
| 1  | 2.5E+08 | 2.5E+08 | KD2-H4K8la_peak_664 | 10.64143 | ZNF669_ENSG00000188295                              |
| 1  | 2.5E+08 | 2.5E+08 | KD2-H4K8la_peak_665 | 5.79108  |                                                     |
| 1  | 2.5E+08 | 2.5E+08 | KD2-H4K8la_peak_666 | 8.75982  | C1orf229_ENSG00000221953                            |
| 1  | 2.5E+08 | 2.5E+08 | KD2-H4K8la_peak_667 | 9.9149   | ZNF496_ENSG00000162714                              |
| 1  | 2.5E+08 | 2.5E+08 | KD2-H4K8la_peak_668 | 7.16303  | ZNF496_ENSG00000162714                              |
| 1  | 2.5E+08 | 2.5E+08 | KD2-H4K8la_peak_669 | 12.85404 |                                                     |
| 10 | 180670  | 181194  | KD2-H4K8la_peak_670 | 5.7631   | ZMYND11_ENSG00000015171                             |
| 10 | 1033896 | 1034183 | KD2-H4K8la_peak_671 | 5.58883  | AL359878.1_ENSG00000205740;GTPBP4_ENSG00000107937   |
| 10 | 1102266 | 1102496 | KD2-H4K8la_peak_672 | 6.36118  |                                                     |
| 10 | 1314839 | 1315445 | KD2-H4K8la_peak_673 | 7.49467  |                                                     |
| 10 | 1315658 | 1316063 | KD2-H4K8la_peak_674 | 14.40178 |                                                     |
| 10 | 1316953 | 1317311 | KD2-H4K8la_peak_675 | 12.21541 |                                                     |
| 10 | 1332412 | 1332771 | KD2-H4K8la_peak_676 | 5.52913  |                                                     |
| 10 | 1334694 | 1335064 | KD2-H4K8la_peak_677 | 13.95047 |                                                     |
| 10 | 2267472 | 2267847 | KD2-H4K8la_peak_678 | 13.3197  |                                                     |
| 10 | 4868505 | 4868774 | KD2-H4K8la_peak_679 | 9.11321  |                                                     |
| 10 | 5932364 | 5932619 | KD2-H4K8la_peak_680 | 7.56395  | ANKRD16_ENSG00000134461;FBXO18_ENSG00000134452      |
| 10 | 6622534 | 6622738 | KD2-H4K8la_peak_681 | 5.05146  | PRKCQ_ENSG00000065675;PRKCQ-AS1_ENSG00000237943     |
| 10 | 7310506 | 7310729 | KD2-H4K8la_peak_682 | 8.60796  |                                                     |
| 10 | 7860551 | 7860750 | KD2-H4K8la_peak_683 | 5.58883  | TAF3_ENSG00000165632                                |
| 10 | 8091800 | 8092061 | KD2-H4K8la_peak_684 | 6.04152  |                                                     |
| 10 | 8092783 | 8093014 | KD2-H4K8la_peak_685 | 11.15747 | RP11-379F12.4_ENSG00000232638                       |
| 10 | 8093225 | 8093887 | KD2-H4K8la_peak_686 | 5.58883  | RP11-379F12.4_ENSG00000232638                       |
| 10 | 8100497 | 8100957 | KD2-H4K8la_peak_687 | 7.89224  |                                                     |
| 10 | 8138473 | 8138701 | KD2-H4K8la_peak_688 | 5.52913  |                                                     |

|    |         |         |                     |          |                                                                                        |
|----|---------|---------|---------------------|----------|----------------------------------------------------------------------------------------|
| 10 | 8286954 | 8287160 | KD2-H4K8la_peak_689 | 7.23116  |                                                                                        |
| 10 | 8683484 | 8683835 | KD2-H4K8la_peak_690 | 5.51108  |                                                                                        |
| 10 | 9280179 | 9280457 | KD2-H4K8la_peak_691 | 10.99007 |                                                                                        |
| 10 | 1.2E+07 | 1.2E+07 | KD2-H4K8la_peak_692 | 10.04111 |                                                                                        |
| 10 | 1.3E+07 | 1.3E+07 | KD2-H4K8la_peak_693 | 8.04432  | RP11-730A19.7_ENSG00000237540                                                          |
| 10 | 1.3E+07 | 1.3E+07 | KD2-H4K8la_peak_694 | 13.91009 |                                                                                        |
| 10 | 1.3E+07 | 1.3E+07 | KD2-H4K8la_peak_695 | 5.24865  |                                                                                        |
| 10 | 1.4E+07 | 1.4E+07 | KD2-H4K8la_peak_696 | 8.43222  | BEND7_ENSG00000165626;RP11-214D15.2_ENSG00000227175                                    |
| 10 | 1.5E+07 | 1.5E+07 | KD2-H4K8la_peak_697 | 9.49266  | RP11-398C13.6_ENSG00000272853;SUV39H2_ENSG00000152455                                  |
| 10 | 1.8E+07 | 1.8E+07 | KD2-H4K8la_peak_698 | 6.2278   |                                                                                        |
| 10 | 1.9E+07 | 1.9E+07 | KD2-H4K8la_peak_699 | 6.26214  |                                                                                        |
| 10 | 2E+07   | 2E+07   | KD2-H4K8la_peak_700 | 9.86881  |                                                                                        |
| 10 | 2.2E+07 | 2.2E+07 | KD2-H4K8la_peak_701 | 9.9701   | SKIDA1_ENSG00000180592                                                                 |
| 10 | 2.2E+07 | 2.2E+07 | KD2-H4K8la_peak_702 | 9.05604  |                                                                                        |
| 10 | 2.3E+07 | 2.3E+07 | KD2-H4K8la_peak_703 | 13.91009 | BMI1_ENSG00000168283                                                                   |
| 10 | 2.3E+07 | 2.3E+07 | KD2-H4K8la_peak_704 | 4.69635  |                                                                                        |
| 10 | 2.3E+07 | 2.3E+07 | KD2-H4K8la_peak_705 | 7.68279  | RP11-573G6.10_ENSG00000272366                                                          |
| 10 | 2.3E+07 | 2.3E+07 | KD2-H4K8la_peak_706 | 12.92798 | PIP4K2A_ENSG00000150867                                                                |
| 10 | 2.3E+07 | 2.3E+07 | KD2-H4K8la_peak_707 | 11.06859 | MSRB2_ENSG00000148450                                                                  |
| 10 | 2.4E+07 | 2.4E+07 | KD2-H4K8la_peak_708 | 8.31696  | OTUD1_ENSG00000165312                                                                  |
| 10 | 2.5E+07 | 2.5E+07 | KD2-H4K8la_peak_709 | 6.13507  | PRTFDC1_ENSG00000099256;RP11-165A20.3_ENSG00000273107                                  |
| 10 | 2.8E+07 | 2.8E+07 | KD2-H4K8la_peak_710 | 4.53273  |                                                                                        |
| 10 | 2.9E+07 | 2.9E+07 | KD2-H4K8la_peak_711 | 6.26214  |                                                                                        |
| 10 | 2.9E+07 | 2.9E+07 | KD2-H4K8la_peak_712 | 5.79108  | WAC-AS1_ENSG00000254635;WAC_ENSG00000095787                                            |
| 10 | 3.1E+07 | 3.1E+07 | KD2-H4K8la_peak_713 | 12.1221  |                                                                                        |
| 10 | 3.1E+07 | 3.1E+07 | KD2-H4K8la_peak_714 | 9.86881  | ZNF438_ENSG00000183621                                                                 |
| 10 | 3.2E+07 | 3.2E+07 | KD2-H4K8la_peak_715 | 9.08387  |                                                                                        |
| 10 | 3.3E+07 | 3.3E+07 | KD2-H4K8la_peak_716 | 15.62171 | RP11-135A24.4_ENSG00000233825;AL391839.1_ENSG00000222309;RP11-135A24.2_ENSG00000229327 |
| 10 | 3.3E+07 | 3.3E+07 | KD2-H4K8la_peak_717 | 9.86881  | CCDC7_ENSG00000216937                                                                  |
| 10 | 3.3E+07 | 3.3E+07 | KD2-H4K8la_peak_718 | 8.43222  | CCDC7_ENSG00000216937                                                                  |
| 10 | 3.3E+07 | 3.3E+07 | KD2-H4K8la_peak_719 | 11.40266 | RP11-462L8.1_ENSG00000229656                                                           |
| 10 | 3.5E+07 | 3.5E+07 | KD2-H4K8la_peak_720 | 6.70626  |                                                                                        |
| 10 | 3.5E+07 | 3.5E+07 | KD2-H4K8la_peak_721 | 11.36807 | PARD3_ENSG00000148498;PARD3-AS1_ENSG00000226386                                        |
| 10 | 3.9E+07 | 3.9E+07 | KD2-H4K8la_peak_722 | 10.04111 | SEPT7P9_ENSG00000120555                                                                |
| 10 | 3.9E+07 | 3.9E+07 | KD2-H4K8la_peak_723 | 11.97807 | SEPT7P9_ENSG00000120555                                                                |
| 10 | 4.3E+07 | 4.3E+07 | KD2-H4K8la_peak_724 | 7.79412  | RP11-124O11.1_ENSG00000234944                                                          |
| 10 | 4.3E+07 | 4.3E+07 | KD2-H4K8la_peak_725 | 7.49467  |                                                                                        |
| 10 | 4.3E+07 | 4.3E+07 | KD2-H4K8la_peak_726 | 5.05146  |                                                                                        |
| 10 | 4.3E+07 | 4.3E+07 | KD2-H4K8la_peak_727 | 5.6499   |                                                                                        |
| 10 | 4.3E+07 | 4.3E+07 | KD2-H4K8la_peak_728 | 9.0413   |                                                                                        |
| 10 | 4.3E+07 | 4.3E+07 | KD2-H4K8la_peak_729 | 10.20357 |                                                                                        |
| 10 | 4.3E+07 | 4.3E+07 | KD2-H4K8la_peak_730 | 5.22418  |                                                                                        |
| 10 | 4.3E+07 | 4.3E+07 | KD2-H4K8la_peak_731 | 5.33301  |                                                                                        |
| 10 | 4.3E+07 | 4.3E+07 | KD2-H4K8la_peak_732 | 9.35473  | RP11-124O11.2_ENSG00000229630                                                          |
| 10 | 4.3E+07 | 4.3E+07 | KD2-H4K8la_peak_733 | 9.40293  |                                                                                        |
| 10 | 4.4E+07 | 4.4E+07 | KD2-H4K8la_peak_734 | 7.22716  |                                                                                        |



|    |         |         |                     |          |                                                                             |
|----|---------|---------|---------------------|----------|-----------------------------------------------------------------------------|
| 10 | 4.4E+07 | 4.4E+07 | KD2-H4K8la_peak_735 | 6.8348   |                                                                             |
| 10 | 4.4E+07 | 4.4E+07 | KD2-H4K8la_peak_736 | 7.64387  |                                                                             |
| 10 | 4.4E+07 | 4.4E+07 | KD2-H4K8la_peak_737 | 5.35972  |                                                                             |
| 10 | 4.4E+07 | 4.4E+07 | KD2-H4K8la_peak_738 | 6.92459  | RET_ENSG00000165731                                                         |
| 10 | 4.4E+07 | 4.4E+07 | KD2-H4K8la_peak_739 | 8.944    | RP11-351D16.3_ENSG00000273008;CSGALNACT2_ENSG00000169826                    |
| 10 | 4.4E+07 | 4.4E+07 | KD2-H4K8la_peak_740 | 19.77487 |                                                                             |
| 10 | 4.4E+07 | 4.4E+07 | KD2-H4K8la_peak_741 | 8.50453  | HNRNPF_ENSG00000169813                                                      |
| 10 | 4.4E+07 | 4.4E+07 | KD2-H4K8la_peak_742 | 7.13237  | RP11-517P14.2_ENSG00000230555                                               |
| 10 | 4.4E+07 | 4.4E+07 | KD2-H4K8la_peak_743 | 5.90392  | RP11-517P14.2_ENSG00000230555                                               |
| 10 | 4.4E+07 | 4.4E+07 | KD2-H4K8la_peak_744 | 6.13507  | ZNF239_ENSG00000196793                                                      |
| 10 | 4.4E+07 | 4.4E+07 | KD2-H4K8la_peak_745 | 4.86896  | CAP1P2_ENSG00000232004;ZNF485_ENSG00000198298                               |
| 10 | 4.4E+07 | 4.4E+07 | KD2-H4K8la_peak_746 | 6.76424  | ZNF32_ENSG00000169740                                                       |
| 10 | 4.4E+07 | 4.4E+07 | KD2-H4K8la_peak_747 | 6.0136   | ZNF32_ENSG00000169740                                                       |
| 10 | 4.6E+07 | 4.6E+07 | KD2-H4K8la_peak_748 | 7.13237  |                                                                             |
| 10 | 4.6E+07 | 4.6E+07 | KD2-H4K8la_peak_749 | 6.28277  | ZFAND4_ENSG00000172671                                                      |
| 10 | 4.6E+07 | 4.6E+07 | KD2-H4K8la_peak_750 | 19.28322 | FAM21FP_ENSG00000237840;RP11-671E7.1_ENSG00000228702;FAM21C_ENSG00000172661 |
| 10 | 4.7E+07 | 4.7E+07 | KD2-H4K8la_peak_751 | 7.61975  |                                                                             |
| 10 | 4.7E+07 | 4.7E+07 | KD2-H4K8la_peak_752 | 8.11213  |                                                                             |
| 10 | 4.7E+07 | 4.7E+07 | KD2-H4K8la_peak_753 | 8.81931  | GPRIN2_ENSG00000204175                                                      |
| 10 | 4.7E+07 | 4.7E+07 | KD2-H4K8la_peak_754 | 10.91646 |                                                                             |
| 10 | 4.7E+07 | 4.7E+07 | KD2-H4K8la_peak_755 | 11.04415 |                                                                             |
| 10 | 4.7E+07 | 4.7E+07 | KD2-H4K8la_peak_756 | 7.58308  |                                                                             |
| 10 | 5E+07   | 5E+07   | KD2-H4K8la_peak_757 | 4.36246  |                                                                             |
| 10 | 5E+07   | 5E+07   | KD2-H4K8la_peak_758 | 6.2278   |                                                                             |
| 10 | 5.1E+07 | 5.1E+07 | KD2-H4K8la_peak_759 | 6.13507  | C10orf71-AS1_ENSG00000236208;C10orf71_ENSG00000177354                       |
| 10 | 5.1E+07 | 5.1E+07 | KD2-H4K8la_peak_760 | 5.58883  |                                                                             |
| 10 | 5.1E+07 | 5.1E+07 | KD2-H4K8la_peak_761 | 5.33301  |                                                                             |
| 10 | 5.1E+07 | 5.1E+07 | KD2-H4K8la_peak_762 | 5.84082  | OGDHL_ENSG00000197444                                                       |
| 10 | 5.1E+07 | 5.2E+07 | KD2-H4K8la_peak_763 | 6.3399   |                                                                             |
| 10 | 5.2E+07 | 5.2E+07 | KD2-H4K8la_peak_764 | 8.77936  | RP11-324H6.5_ENSG00000235618;FAM21A_ENSG00000099290                         |
| 10 | 5.2E+07 | 5.2E+07 | KD2-H4K8la_peak_765 | 9.19986  | ASAH2B_ENSG00000204147                                                      |
| 10 | 6E+07   | 6E+07   | KD2-H4K8la_peak_766 | 10.04111 | UBE2D1_ENSG00000072401                                                      |
| 10 | 6.2E+07 | 6.2E+07 | KD2-H4K8la_peak_767 | 10.98662 | ANK3_ENSG00000151150;RP11-131N11.4_ENSG00000254271                          |
| 10 | 6.6E+07 | 6.6E+07 | KD2-H4K8la_peak_768 | 8.35736  |                                                                             |
| 10 | 7E+07   | 7E+07   | KD2-H4K8la_peak_769 | 18.59289 | SLC25A16_ENSG00000122912                                                    |
| 10 | 7E+07   | 7E+07   | KD2-H4K8la_peak_770 | 7.91061  | CCAR1_ENSG00000060339                                                       |
| 10 | 7.1E+07 | 7.1E+07 | KD2-H4K8la_peak_771 | 8.63473  | DDX50_ENSG00000107625                                                       |
| 10 | 7.1E+07 | 7.1E+07 | KD2-H4K8la_peak_772 | 9.49266  | DDX21_ENSG00000165732                                                       |
| 10 | 7.1E+07 | 7.1E+07 | KD2-H4K8la_peak_773 | 8.37064  | KIAA1279_ENSG00000198954                                                    |
| 10 | 7.1E+07 | 7.1E+07 | KD2-H4K8la_peak_774 | 8.26997  |                                                                             |
| 10 | 7.1E+07 | 7.1E+07 | KD2-H4K8la_peak_775 | 13.20018 |                                                                             |
| 10 | 7.1E+07 | 7.1E+07 | KD2-H4K8la_peak_776 | 6.75892  |                                                                             |
| 10 | 7.1E+07 | 7.1E+07 | KD2-H4K8la_peak_777 | 8.07102  |                                                                             |
| 10 | 7.2E+07 | 7.2E+07 | KD2-H4K8la_peak_778 | 8.76116  |                                                                             |
| 10 | 7.2E+07 | 7.2E+07 | KD2-H4K8la_peak_779 | 7.90495  | H2AFY2_ENSG00000099284                                                      |
| 10 | 7.2E+07 | 7.2E+07 | KD2-H4K8la_peak_780 | 12.36938 | AIFM2_ENSG00000042286                                                       |

|    |         |         |                     |          |                           |
|----|---------|---------|---------------------|----------|---------------------------|
| 10 | 7.2E+07 | 7.2E+07 | KD2-H4K8la_peak_781 | 8.6948   | SAR1A_ENSG00000079332     |
| 10 | 7.2E+07 | 7.2E+07 | KD2-H4K8la_peak_782 | 7.56826  |                           |
| 10 | 7.2E+07 | 7.2E+07 | KD2-H4K8la_peak_783 | 8.76116  |                           |
| 10 | 7.2E+07 | 7.2E+07 | KD2-H4K8la_peak_784 | 6.0136   | PALD1_ENSG00000107719     |
| 10 | 7.2E+07 | 7.2E+07 | KD2-H4K8la_peak_785 | 6.36118  |                           |
| 10 | 7.3E+07 | 7.3E+07 | KD2-H4K8la_peak_786 | 11.60966 |                           |
| 10 | 7.3E+07 | 7.3E+07 | KD2-H4K8la_peak_787 | 22.21576 |                           |
| 10 | 7.3E+07 | 7.3E+07 | KD2-H4K8la_peak_788 | 13.27013 |                           |
| 10 | 7.3E+07 | 7.3E+07 | KD2-H4K8la_peak_789 | 6.3399   |                           |
| 10 | 7.3E+07 | 7.3E+07 | KD2-H4K8la_peak_790 | 5.27164  |                           |
| 10 | 7.3E+07 | 7.3E+07 | KD2-H4K8la_peak_791 | 4.66473  |                           |
| 10 | 7.3E+07 | 7.3E+07 | KD2-H4K8la_peak_792 | 6.01825  |                           |
| 10 | 7.3E+07 | 7.3E+07 | KD2-H4K8la_peak_793 | 7.61975  |                           |
| 10 | 7.3E+07 | 7.3E+07 | KD2-H4K8la_peak_794 | 8.06101  |                           |
| 10 | 7.3E+07 | 7.3E+07 | KD2-H4K8la_peak_795 | 6.40658  |                           |
| 10 | 7.3E+07 | 7.3E+07 | KD2-H4K8la_peak_796 | 10.39965 |                           |
| 10 | 7.3E+07 | 7.3E+07 | KD2-H4K8la_peak_797 | 6.40658  |                           |
| 10 | 7.3E+07 | 7.3E+07 | KD2-H4K8la_peak_798 | 6.68593  |                           |
| 10 | 7.3E+07 | 7.3E+07 | KD2-H4K8la_peak_799 | 6.66345  |                           |
| 10 | 7.3E+07 | 7.3E+07 | KD2-H4K8la_peak_800 | 5.80342  |                           |
| 10 | 7.3E+07 | 7.3E+07 | KD2-H4K8la_peak_801 | 8.50453  |                           |
| 10 | 7.3E+07 | 7.3E+07 | KD2-H4K8la_peak_802 | 6.52199  |                           |
| 10 | 7.3E+07 | 7.3E+07 | KD2-H4K8la_peak_803 | 11.15747 |                           |
| 10 | 7.3E+07 | 7.3E+07 | KD2-H4K8la_peak_804 | 9.61894  |                           |
| 10 | 7.3E+07 | 7.3E+07 | KD2-H4K8la_peak_805 | 6.56022  | SLC29A3_ENSG00000198246   |
| 10 | 7.3E+07 | 7.3E+07 | KD2-H4K8la_peak_806 | 9.37943  |                           |
| 10 | 7.3E+07 | 7.3E+07 | KD2-H4K8la_peak_807 | 4.66473  |                           |
| 10 | 7.3E+07 | 7.3E+07 | KD2-H4K8la_peak_808 | 8.38878  |                           |
| 10 | 7.3E+07 | 7.3E+07 | KD2-H4K8la_peak_809 | 6.19992  | C10orf105_ENSG00000214688 |
| 10 | 7.4E+07 | 7.4E+07 | KD2-H4K8la_peak_810 | 4.86896  | PSAP_ENSG00000197746      |
| 10 | 7.4E+07 | 7.4E+07 | KD2-H4K8la_peak_811 | 5.88616  |                           |
| 10 | 7.4E+07 | 7.4E+07 | KD2-H4K8la_peak_812 | 7.49467  |                           |
| 10 | 7.4E+07 | 7.4E+07 | KD2-H4K8la_peak_813 | 5.67596  |                           |
| 10 | 7.4E+07 | 7.4E+07 | KD2-H4K8la_peak_814 | 5.30989  |                           |
| 10 | 7.4E+07 | 7.4E+07 | KD2-H4K8la_peak_815 | 7.56395  |                           |
| 10 | 7.4E+07 | 7.4E+07 | KD2-H4K8la_peak_816 | 8.16787  |                           |
| 10 | 7.4E+07 | 7.4E+07 | KD2-H4K8la_peak_817 | 6.76703  |                           |
| 10 | 7.4E+07 | 7.4E+07 | KD2-H4K8la_peak_818 | 12.30425 |                           |
| 10 | 7.4E+07 | 7.4E+07 | KD2-H4K8la_peak_819 | 8.1293   |                           |
| 10 | 7.4E+07 | 7.4E+07 | KD2-H4K8la_peak_820 | 6.68593  |                           |
| 10 | 7.4E+07 | 7.4E+07 | KD2-H4K8la_peak_821 | 14.42249 |                           |
| 10 | 7.4E+07 | 7.4E+07 | KD2-H4K8la_peak_822 | 6.2278   | DNAJB12_ENSG00000148719   |
| 10 | 7.5E+07 | 7.5E+07 | KD2-H4K8la_peak_823 | 5.468    |                           |
| 10 | 7.6E+07 | 7.6E+07 | KD2-H4K8la_peak_824 | 5.7631   | ZSWIM8_ENSG00000214655    |
| 10 | 7.7E+07 | 7.7E+07 | KD2-H4K8la_peak_825 | 10.49982 | KAT6B_ENSG00000156650     |
| 10 | 7.7E+07 | 7.7E+07 | KD2-H4K8la_peak_826 | 10.74378 | KAT6B_ENSG00000156650     |

|    |         |         |                     |          |                                              |
|----|---------|---------|---------------------|----------|----------------------------------------------|
| 10 | 7.7E+07 | 7.7E+07 | KD2-H4K8la_peak_827 | 6.03964  |                                              |
| 10 | 7.7E+07 | 7.7E+07 | KD2-H4K8la_peak_828 | 8.76116  |                                              |
| 10 | 7.7E+07 | 7.7E+07 | KD2-H4K8la_peak_829 | 6.70626  | RP11-399K21.10_ENSG00000236842               |
| 10 | 8E+07   | 8E+07   | KD2-H4K8la_peak_830 | 7.12014  |                                              |
| 10 | 8E+07   | 8E+07   | KD2-H4K8la_peak_831 | 6.13507  |                                              |
| 10 | 8E+07   | 8E+07   | KD2-H4K8la_peak_832 | 6.68593  | RP11-90J7.2_ENSG00000229543                  |
| 10 | 8E+07   | 8E+07   | KD2-H4K8la_peak_833 | 4.90979  |                                              |
| 10 | 8E+07   | 8E+07   | KD2-H4K8la_peak_834 | 4.75945  |                                              |
| 10 | 8E+07   | 8E+07   | KD2-H4K8la_peak_835 | 8.07102  |                                              |
| 10 | 8E+07   | 8E+07   | KD2-H4K8la_peak_836 | 6.64804  |                                              |
| 10 | 8E+07   | 8E+07   | KD2-H4K8la_peak_837 | 11.90654 |                                              |
| 10 | 8E+07   | 8E+07   | KD2-H4K8la_peak_838 | 9.49266  |                                              |
| 10 | 8E+07   | 8E+07   | KD2-H4K8la_peak_839 | 6.68593  |                                              |
| 10 | 8.1E+07 | 8.1E+07 | KD2-H4K8la_peak_840 | 10.47452 |                                              |
| 10 | 8.1E+07 | 8.1E+07 | KD2-H4K8la_peak_841 | 5.05146  |                                              |
| 10 | 8.1E+07 | 8.1E+07 | KD2-H4K8la_peak_842 | 4.66473  |                                              |
| 10 | 8.1E+07 | 8.1E+07 | KD2-H4K8la_peak_843 | 4.30663  |                                              |
| 10 | 8.1E+07 | 8.1E+07 | KD2-H4K8la_peak_844 | 7.49467  |                                              |
| 10 | 8.1E+07 | 8.1E+07 | KD2-H4K8la_peak_845 | 11.72187 |                                              |
| 10 | 8.1E+07 | 8.1E+07 | KD2-H4K8la_peak_846 | 7.22716  |                                              |
| 10 | 8.1E+07 | 8.1E+07 | KD2-H4K8la_peak_847 | 5.6499   |                                              |
| 10 | 8.1E+07 | 8.1E+07 | KD2-H4K8la_peak_848 | 10.84057 |                                              |
| 10 | 8.1E+07 | 8.1E+07 | KD2-H4K8la_peak_849 | 5.83285  |                                              |
| 10 | 8.1E+07 | 8.1E+07 | KD2-H4K8la_peak_850 | 6.3399   |                                              |
| 10 | 8.1E+07 | 8.1E+07 | KD2-H4K8la_peak_851 | 5.24027  |                                              |
| 10 | 8.1E+07 | 8.1E+07 | KD2-H4K8la_peak_852 | 6.9399   |                                              |
| 10 | 8.1E+07 | 8.1E+07 | KD2-H4K8la_peak_853 | 8.52304  |                                              |
| 10 | 8.1E+07 | 8.1E+07 | KD2-H4K8la_peak_854 | 8.48488  |                                              |
| 10 | 8.1E+07 | 8.1E+07 | KD2-H4K8la_peak_855 | 8.76116  |                                              |
| 10 | 8.1E+07 | 8.1E+07 | KD2-H4K8la_peak_856 | 6.45303  |                                              |
| 10 | 8.1E+07 | 8.1E+07 | KD2-H4K8la_peak_857 | 7.06427  |                                              |
| 10 | 8.1E+07 | 8.1E+07 | KD2-H4K8la_peak_858 | 7.06427  |                                              |
| 10 | 8.1E+07 | 8.1E+07 | KD2-H4K8la_peak_859 | 12.62032 |                                              |
| 10 | 8.1E+07 | 8.1E+07 | KD2-H4K8la_peak_860 | 7.12014  |                                              |
| 10 | 8.1E+07 | 8.1E+07 | KD2-H4K8la_peak_861 | 6.13507  | PIIF_ENSG00000108179                         |
| 10 | 8.1E+07 | 8.1E+07 | KD2-H4K8la_peak_862 | 5.05146  |                                              |
| 10 | 8.2E+07 | 8.2E+07 | KD2-H4K8la_peak_863 | 11.40266 | MBL1P_ENSG00000242600                        |
| 10 | 8.2E+07 | 8.2E+07 | KD2-H4K8la_peak_864 | 6.3399   | FAM213A_ENSG00000122378                      |
| 10 | 8.8E+07 | 8.8E+07 | KD2-H4K8la_peak_865 | 6.54311  |                                              |
| 10 | 8.8E+07 | 8.8E+07 | KD2-H4K8la_peak_866 | 5.7631   |                                              |
| 10 | 8.9E+07 | 8.9E+07 | KD2-H4K8la_peak_867 | 5.58883  |                                              |
| 10 | 9.3E+07 | 9.3E+07 | KD2-H4K8la_peak_868 | 16.25311 | HECTD2_ENSG00000165338                       |
| 10 | 9.4E+07 | 9.4E+07 | KD2-H4K8la_peak_869 | 5.7631   |                                              |
| 10 | 9.4E+07 | 9.4E+07 | KD2-H4K8la_peak_870 | 13.20018 | CPEB3_ENSG00000107864;MARCH5_ENSG00000198060 |
| 10 | 9.5E+07 | 9.5E+07 | KD2-H4K8la_peak_871 | 9.11321  |                                              |
| 10 | 9.6E+07 | 9.6E+07 | KD2-H4K8la_peak_872 | 7.12014  | SLC35G1_ENSG00000176273                      |

|    |         |         |                     |          |                                                                                             |
|----|---------|---------|---------------------|----------|---------------------------------------------------------------------------------------------|
| 10 | 9.6E+07 | 9.6E+07 | KD2-H4K8la_peak_873 | 5.67034  | TBC1D12_ENSG00000108239                                                                     |
| 10 | 9.7E+07 | 9.7E+07 | KD2-H4K8la_peak_874 | 11.70864 | PAWRP1_ENSG00000225533                                                                      |
| 10 | 9.8E+07 | 9.8E+07 | KD2-H4K8la_peak_875 | 12.14099 | CCNJ_ENSG00000107443                                                                        |
| 10 | 9.8E+07 | 9.8E+07 | KD2-H4K8la_peak_876 | 4.75945  | TM9SF3_ENSG00000077147                                                                      |
| 10 | 9.8E+07 | 9.8E+07 | KD2-H4K8la_peak_877 | 7.61975  | PIK3AP1_ENSG00000155629                                                                     |
| 10 | 9.9E+07 | 9.9E+07 | KD2-H4K8la_peak_878 | 6.69599  |                                                                                             |
| 10 | 9.9E+07 | 9.9E+07 | KD2-H4K8la_peak_879 | 7.12014  | AL355490.1_ENSG00000224474;PGAM1_ENSG00000171314                                            |
| 10 | 9.9E+07 | 9.9E+07 | KD2-H4K8la_peak_880 | 6.85533  | MORN4_ENSG00000171160                                                                       |
| 10 | 9.9E+07 | 9.9E+07 | KD2-H4K8la_peak_881 | 13.79336 |                                                                                             |
| 10 | 9.9E+07 | 9.9E+07 | KD2-H4K8la_peak_882 | 11.45561 | MARVELD1_ENSG00000155254                                                                    |
| 10 | 9.9E+07 | 9.9E+07 | KD2-H4K8la_peak_883 | 8.76082  | ZFYVE27_ENSG00000155256                                                                     |
| 10 | 1E+08   | 1E+08   | KD2-H4K8la_peak_884 | 7.4233   |                                                                                             |
| 10 | 1E+08   | 1E+08   | KD2-H4K8la_peak_885 | 10.31941 |                                                                                             |
| 10 | 1E+08   | 1E+08   | KD2-H4K8la_peak_886 | 9.27415  | R3HCC1L_ENSG00000166024                                                                     |
| 10 | 1E+08   | 1E+08   | KD2-H4K8la_peak_887 | 5.58883  | LOXL4_ENSG00000138131                                                                       |
| 10 | 1E+08   | 1E+08   | KD2-H4K8la_peak_888 | 5.60379  |                                                                                             |
| 10 | 1E+08   | 1E+08   | KD2-H4K8la_peak_889 | 6.63409  | CWF19L1_ENSG00000095485                                                                     |
| 10 | 1E+08   | 1E+08   | KD2-H4K8la_peak_890 | 6.3399   | SEC31B_ENSG00000075826;NDUFB8_ENSG00000255339;NDUFB8_ENSG00000166136;HIF1AN_ENSG00000166135 |
| 10 | 1E+08   | 1E+08   | KD2-H4K8la_peak_891 | 6.64804  |                                                                                             |
| 10 | 1E+08   | 1E+08   | KD2-H4K8la_peak_892 | 8.07044  |                                                                                             |
| 10 | 1E+08   | 1E+08   | KD2-H4K8la_peak_893 | 6.26214  |                                                                                             |
| 10 | 1E+08   | 1E+08   | KD2-H4K8la_peak_894 | 13.84838 |                                                                                             |
| 10 | 1E+08   | 1E+08   | KD2-H4K8la_peak_895 | 6.71169  |                                                                                             |
| 10 | 1E+08   | 1E+08   | KD2-H4K8la_peak_896 | 9.03222  |                                                                                             |
| 10 | 1E+08   | 1E+08   | KD2-H4K8la_peak_897 | 6.47589  | BTRC_ENSG00000166167                                                                        |
| 10 | 1E+08   | 1E+08   | KD2-H4K8la_peak_898 | 8.37064  | DPCD_ENSG00000166171                                                                        |
| 10 | 1E+08   | 1E+08   | KD2-H4K8la_peak_899 | 10.92814 | FBXW4_ENSG00000107829                                                                       |
| 10 | 1E+08   | 1E+08   | KD2-H4K8la_peak_900 | 5.43278  | C10orf76_ENSG00000120029                                                                    |
| 10 | 1E+08   | 1E+08   | KD2-H4K8la_peak_901 | 6.03112  | HPS6_ENSG00000166189                                                                        |
| 10 | 1E+08   | 1E+08   | KD2-H4K8la_peak_902 | 6.5142   | NOLC1_ENSG00000166197                                                                       |
| 10 | 1E+08   | 1E+08   | KD2-H4K8la_peak_903 | 7.81267  | GBF1_ENSG00000107862                                                                        |
| 10 | 1E+08   | 1E+08   | KD2-H4K8la_peak_904 | 10.31182 | CUEDC2_ENSG00000107874                                                                      |
| 10 | 1E+08   | 1E+08   | KD2-H4K8la_peak_905 | 14.40178 | TMEM180_ENSG00000138111                                                                     |
| 10 | 1E+08   | 1E+08   | KD2-H4K8la_peak_906 | 6.39807  |                                                                                             |
| 10 | 1E+08   | 1E+08   | KD2-H4K8la_peak_907 | 4.75945  |                                                                                             |
| 10 | 1E+08   | 1E+08   | KD2-H4K8la_peak_908 | 9.27415  | RP11-47A8.5_ENSG00000272933                                                                 |
| 10 | 1E+08   | 1E+08   | KD2-H4K8la_peak_909 | 12.07084 | RP11-47A8.5_ENSG00000272933;TRIM8_ENSG00000171206                                           |
| 10 | 1E+08   | 1E+08   | KD2-H4K8la_peak_910 | 5.33301  | AS3MT_ENSG00000214435                                                                       |
| 10 | 1.1E+08 | 1.1E+08 | KD2-H4K8la_peak_911 | 6.3399   | TAF5_ENSG00000148835                                                                        |
| 10 | 1.1E+08 | 1.1E+08 | KD2-H4K8la_peak_912 | 12.23212 |                                                                                             |
| 10 | 1.1E+08 | 1.1E+08 | KD2-H4K8la_peak_913 | 6.64804  |                                                                                             |
| 10 | 1.1E+08 | 1.1E+08 | KD2-H4K8la_peak_914 | 8.40055  | SH3PXD2A_ENSG00000107957                                                                    |
| 10 | 1.1E+08 | 1.1E+08 | KD2-H4K8la_peak_915 | 10.98662 | SORCS1_ENSG00000108018                                                                      |
| 10 | 1.1E+08 | 1.1E+08 | KD2-H4K8la_peak_916 | 10.36292 |                                                                                             |
| 10 | 1.1E+08 | 1.1E+08 | KD2-H4K8la_peak_917 | 6.57319  | SMNDC1_ENSG00000119953                                                                      |
| 10 | 1.1E+08 | 1.1E+08 | KD2-H4K8la_peak_918 | 9.96333  |                                                                                             |

|    |         |         |                     |          |                                                                                 |
|----|---------|---------|---------------------|----------|---------------------------------------------------------------------------------|
| 10 | 1.1E+08 | 1.1E+08 | KD2-H4K8la_peak_919 | 9.41442  | GPAM_ENSG00000119927                                                            |
| 10 | 1.2E+08 | 1.2E+08 | KD2-H4K8la_peak_920 | 7.12014  | DCLRE1A_ENSG00000198924;NHLRC2_ENSG00000196865                                  |
| 10 | 1.2E+08 | 1.2E+08 | KD2-H4K8la_peak_921 | 6.70626  |                                                                                 |
| 10 | 1.2E+08 | 1.2E+08 | KD2-H4K8la_peak_922 | 4.86896  | HSPA12A_ENSG00000165868                                                         |
| 10 | 1.2E+08 | 1.2E+08 | KD2-H4K8la_peak_923 | 8.37064  |                                                                                 |
| 10 | 1.2E+08 | 1.2E+08 | KD2-H4K8la_peak_924 | 7.61975  | CACUL1_ENSG00000151893                                                          |
| 10 | 1.2E+08 | 1.2E+08 | KD2-H4K8la_peak_925 | 6.28277  |                                                                                 |
| 10 | 1.2E+08 | 1.2E+08 | KD2-H4K8la_peak_926 | 5.83285  | EIF3A_ENSG00000107581                                                           |
| 10 | 1.2E+08 | 1.2E+08 | KD2-H4K8la_peak_927 | 6.3399   | SFXN4_ENSG00000183605                                                           |
| 10 | 1.2E+08 | 1.2E+08 | KD2-H4K8la_peak_928 | 9.0516   | RGS10_ENSG00000148908                                                           |
| 10 | 1.2E+08 | 1.2E+08 | KD2-H4K8la_peak_929 | 6.3399   | TIAL1_ENSG00000151923                                                           |
| 10 | 1.2E+08 | 1.2E+08 | KD2-H4K8la_peak_930 | 15.48964 |                                                                                 |
| 10 | 1.2E+08 | 1.2E+08 | KD2-H4K8la_peak_931 | 6.25288  |                                                                                 |
| 10 | 1.2E+08 | 1.2E+08 | KD2-H4K8la_peak_932 | 6.4077   | FGFR2_ENSG00000066468                                                           |
| 10 | 1.2E+08 | 1.2E+08 | KD2-H4K8la_peak_933 | 8.77936  |                                                                                 |
| 10 | 1.2E+08 | 1.2E+08 | KD2-H4K8la_peak_934 | 5.89088  |                                                                                 |
| 10 | 1.2E+08 | 1.2E+08 | KD2-H4K8la_peak_935 | 6.2278   |                                                                                 |
| 10 | 1.2E+08 | 1.2E+08 | KD2-H4K8la_peak_936 | 7.94013  | PLEKHA1_ENSG00000107679                                                         |
| 10 | 1.2E+08 | 1.2E+08 | KD2-H4K8la_peak_937 | 10.20357 | C10orf88_ENSG00000119965;PSTK_ENSG00000179988                                   |
| 10 | 1.2E+08 | 1.2E+08 | KD2-H4K8la_peak_938 | 4.86896  | BUB3_ENSG00000154473                                                            |
| 10 | 1.3E+08 | 1.3E+08 | KD2-H4K8la_peak_939 | 6.0136   |                                                                                 |
| 10 | 1.3E+08 | 1.3E+08 | KD2-H4K8la_peak_940 | 8.37064  |                                                                                 |
| 10 | 1.3E+08 | 1.3E+08 | KD2-H4K8la_peak_941 | 5.9366   |                                                                                 |
| 10 | 1.3E+08 | 1.3E+08 | KD2-H4K8la_peak_942 | 8.8932   |                                                                                 |
| 10 | 1.3E+08 | 1.3E+08 | KD2-H4K8la_peak_943 | 11.40266 | FAM175B_ENSG00000165660                                                         |
| 10 | 1.3E+08 | 1.3E+08 | KD2-H4K8la_peak_944 | 8.7731   |                                                                                 |
| 10 | 1.3E+08 | 1.3E+08 | KD2-H4K8la_peak_945 | 9.27415  |                                                                                 |
| 10 | 1.3E+08 | 1.3E+08 | KD2-H4K8la_peak_946 | 4.86896  | RP11-383C5.4_ENSG00000224023;RP11-383C5.5_ENSG00000234134;EDRF1_ENSG00000107938 |
| 10 | 1.3E+08 | 1.3E+08 | KD2-H4K8la_peak_947 | 12.58104 | UROS_ENSG00000188690;BCCIP_ENSG00000107949                                      |
| 10 | 1.3E+08 | 1.3E+08 | KD2-H4K8la_peak_948 | 7.30722  | DHX32_ENSG00000089876;FANK1_ENSG00000203780                                     |
| 10 | 1.3E+08 | 1.3E+08 | KD2-H4K8la_peak_949 | 10.04111 | ADAM12_ENSG00000148848                                                          |
| 10 | 1.3E+08 | 1.3E+08 | KD2-H4K8la_peak_950 | 5.16597  |                                                                                 |
| 10 | 1.3E+08 | 1.3E+08 | KD2-H4K8la_peak_951 | 8.48085  |                                                                                 |
| 10 | 1.3E+08 | 1.3E+08 | KD2-H4K8la_peak_952 | 8.39919  | MGMT_ENSG00000170430                                                            |
| 10 | 1.3E+08 | 1.3E+08 | KD2-H4K8la_peak_953 | 5.7631   |                                                                                 |
| 10 | 1.3E+08 | 1.3E+08 | KD2-H4K8la_peak_954 | 9.05604  |                                                                                 |
| 10 | 1.3E+08 | 1.3E+08 | KD2-H4K8la_peak_955 | 10.98662 | BNIP3_ENSG00000176171                                                           |
| 10 | 1.3E+08 | 1.3E+08 | KD2-H4K8la_peak_956 | 6.92098  |                                                                                 |
| 10 | 1.3E+08 | 1.3E+08 | KD2-H4K8la_peak_957 | 9.53224  |                                                                                 |
| 10 | 1.3E+08 | 1.3E+08 | KD2-H4K8la_peak_958 | 6.2278   |                                                                                 |
| 10 | 1.3E+08 | 1.3E+08 | KD2-H4K8la_peak_959 | 8.86391  | PWWP2B_ENSG00000171813                                                          |
| 10 | 1.3E+08 | 1.3E+08 | KD2-H4K8la_peak_960 | 7.01227  | PWWP2B_ENSG00000171813                                                          |
| 10 | 1.3E+08 | 1.3E+08 | KD2-H4K8la_peak_961 | 7.61975  | RP11-432J24.5_ENSG00000226900                                                   |
| 10 | 1.3E+08 | 1.3E+08 | KD2-H4K8la_peak_962 | 7.92775  |                                                                                 |
| 10 | 1.4E+08 | 1.4E+08 | KD2-H4K8la_peak_963 | 10.30333 |                                                                                 |
| 10 | 1.4E+08 | 1.4E+08 | KD2-H4K8la_peak_964 | 7.22716  | PAOX_ENSG00000148832                                                            |

|    |         |         |                      |          |                                                                            |
|----|---------|---------|----------------------|----------|----------------------------------------------------------------------------|
| 10 | 1.4E+08 | 1.4E+08 | KD2-H4K8la_peak_965  | 5.83285  | MTG1_ENSG00000148824                                                       |
| 10 | 1.4E+08 | 1.4E+08 | KD2-H4K8la_peak_966  | 4.66473  | MTG1_ENSG00000148824                                                       |
| 11 | 268419  | 268655  | KD2-H4K8la_peak_967  | 8.65116  |                                                                            |
| 11 | 288903  | 289100  | KD2-H4K8la_peak_968  | 4.86896  | ATHL1_ENSG00000142102                                                      |
| 11 | 355672  | 356049  | KD2-H4K8la_peak_969  | 25.0981  |                                                                            |
| 11 | 406567  | 406961  | KD2-H4K8la_peak_970  | 7.72421  |                                                                            |
| 11 | 450548  | 450751  | KD2-H4K8la_peak_971  | 6.77116  |                                                                            |
| 11 | 535818  | 536038  | KD2-H4K8la_peak_972  | 10.52448 |                                                                            |
| 11 | 554656  | 555020  | KD2-H4K8la_peak_973  | 7.78021  |                                                                            |
| 11 | 560249  | 560495  | KD2-H4K8la_peak_974  | 5.31813  | C11orf35_ENSG00000185522;RASSF7_ENSG00000099849                            |
| 11 | 568956  | 569283  | KD2-H4K8la_peak_975  | 8.89364  | MIR210HG_ENSG00000247095;MIR210_ENSG00000199038                            |
| 11 | 726305  | 726516  | KD2-H4K8la_peak_976  | 8.0374   | AP006621.9_ENSG00000269915                                                 |
| 11 | 727803  | 728117  | KD2-H4K8la_peak_977  | 10.23822 | AP006621.9_ENSG00000269915                                                 |
| 11 | 797651  | 798001  | KD2-H4K8la_peak_978  | 7.12014  | SLC25A22_ENSG00000177542                                                   |
| 11 | 911061  | 911395  | KD2-H4K8la_peak_979  | 8.39919  |                                                                            |
| 11 | 1331256 | 1331479 | KD2-H4K8la_peak_980  | 10.66741 | TOLLIP_ENSG00000078902;TOLLIP-AS1_ENSG00000255153                          |
| 11 | 1358214 | 1358450 | KD2-H4K8la_peak_981  | 6.2278   |                                                                            |
| 11 | 1403783 | 1404396 | KD2-H4K8la_peak_982  | 10.52788 |                                                                            |
| 11 | 1410506 | 1410727 | KD2-H4K8la_peak_983  | 7.79412  | BRSK2_ENSG00000174672                                                      |
| 11 | 1568211 | 1568609 | KD2-H4K8la_peak_984  | 9.05604  |                                                                            |
| 11 | 1593819 | 1594183 | KD2-H4K8la_peak_985  | 4.69635  | DUSP8_ENSG00000184545                                                      |
| 11 | 1659542 | 1659920 | KD2-H4K8la_peak_986  | 10.11868 |                                                                            |
| 11 | 1674222 | 1674749 | KD2-H4K8la_peak_987  | 6.36118  |                                                                            |
| 11 | 1714856 | 1715257 | KD2-H4K8la_peak_988  | 9.19986  |                                                                            |
| 11 | 1769990 | 1770206 | KD2-H4K8la_peak_989  | 7.62867  |                                                                            |
| 11 | 1784801 | 1785138 | KD2-H4K8la_peak_990  | 8.39919  | CTSD_ENSG00000117984;AC068580.5_ENSG00000229512;AC068580.1_ENSG00000265587 |
| 11 | 1898422 | 1898712 | KD2-H4K8la_peak_991  | 10.01526 |                                                                            |
| 11 | 1899089 | 1899551 | KD2-H4K8la_peak_992  | 10.77072 |                                                                            |
| 11 | 1968617 | 1969567 | KD2-H4K8la_peak_993  | 19.53802 | MRPL23_ENSG00000214026                                                     |
| 11 | 1970615 | 1970888 | KD2-H4K8la_peak_994  | 8.37064  |                                                                            |
| 11 | 1977377 | 1977688 | KD2-H4K8la_peak_995  | 6.75222  |                                                                            |
| 11 | 1977958 | 1978162 | KD2-H4K8la_peak_996  | 6.68593  |                                                                            |
| 11 | 1989344 | 1990326 | KD2-H4K8la_peak_997  | 8.53077  |                                                                            |
| 11 | 1990792 | 1991163 | KD2-H4K8la_peak_998  | 14.44261 |                                                                            |
| 11 | 1991814 | 1992592 | KD2-H4K8la_peak_999  | 8.15033  |                                                                            |
| 11 | 1998999 | 1999385 | KD2-H4K8la_peak_1000 | 9.95824  |                                                                            |
| 11 | 2000771 | 2001134 | KD2-H4K8la_peak_1001 | 9.77334  |                                                                            |
| 11 | 2001339 | 2001915 | KD2-H4K8la_peak_1002 | 7.7007   |                                                                            |
| 11 | 2003075 | 2003559 | KD2-H4K8la_peak_1003 | 9.52146  |                                                                            |
| 11 | 2003915 | 2004135 | KD2-H4K8la_peak_1004 | 9.20163  |                                                                            |
| 11 | 2004477 | 2005612 | KD2-H4K8la_peak_1005 | 12.21336 |                                                                            |
| 11 | 2009378 | 2009767 | KD2-H4K8la_peak_1006 | 9.9701   |                                                                            |
| 11 | 2010017 | 2010512 | KD2-H4K8la_peak_1007 | 6.40658  | MRPL23-AS1_ENSG00000226416                                                 |
| 11 | 2011377 | 2012069 | KD2-H4K8la_peak_1008 | 7.92775  | MRPL23-AS1_ENSG00000226416;AC051649.6_ENSG00000232987                      |
| 11 | 2012269 | 2012604 | KD2-H4K8la_peak_1009 | 6.83387  | AC051649.6_ENSG00000232987                                                 |
| 11 | 2015602 | 2016047 | KD2-H4K8la_peak_1010 | 11.75972 |                                                                            |

|    |         |         |                      |          |                                                     |
|----|---------|---------|----------------------|----------|-----------------------------------------------------|
| 11 | 2190637 | 2190916 | KD2-H4K8la_peak_1011 | 8.93385  |                                                     |
| 11 | 2211468 | 2211707 | KD2-H4K8la_peak_1012 | 4.69635  |                                                     |
| 11 | 2213603 | 2214077 | KD2-H4K8la_peak_1013 | 14.30428 |                                                     |
| 11 | 2216531 | 2216787 | KD2-H4K8la_peak_1014 | 6.77116  |                                                     |
| 11 | 2336681 | 2337195 | KD2-H4K8la_peak_1015 | 8.37064  |                                                     |
| 11 | 2420637 | 2421060 | KD2-H4K8la_peak_1016 | 7.49467  | TSSC4_ENSG00000184281                               |
| 11 | 2421287 | 2421488 | KD2-H4K8la_peak_1017 | 10.20357 | TSSC4_ENSG00000184281                               |
| 11 | 2724990 | 2725446 | KD2-H4K8la_peak_1018 | 4.38315  |                                                     |
| 11 | 2772209 | 2772446 | KD2-H4K8la_peak_1019 | 4.86896  |                                                     |
| 11 | 2799399 | 2799781 | KD2-H4K8la_peak_1020 | 12.97817 |                                                     |
| 11 | 2800294 | 2800571 | KD2-H4K8la_peak_1021 | 5.8369   |                                                     |
| 11 | 2801298 | 2801701 | KD2-H4K8la_peak_1022 | 11.07667 |                                                     |
| 11 | 2801926 | 2802140 | KD2-H4K8la_peak_1023 | 8.44557  |                                                     |
| 11 | 2905476 | 2905850 | KD2-H4K8la_peak_1024 | 5.05146  |                                                     |
| 11 | 3078110 | 3078368 | KD2-H4K8la_peak_1025 | 7.90495  | CARS_ENSG00000110619                                |
| 11 | 3078966 | 3079233 | KD2-H4K8la_peak_1026 | 10.00612 | CARS_ENSG00000110619                                |
| 11 | 3829984 | 3830189 | KD2-H4K8la_peak_1027 | 7.13237  |                                                     |
| 11 | 4208505 | 4208756 | KD2-H4K8la_peak_1028 | 8.07102  | RP11-23F23.2_ENSG00000254480                        |
| 11 | 4414587 | 4414803 | KD2-H4K8la_peak_1029 | 5.99671  | TRIM21_ENSG00000132109                              |
| 11 | 6495488 | 6495809 | KD2-H4K8la_peak_1030 | 5.43466  | TRIM3_ENSG00000110171                               |
| 11 | 6608336 | 6608549 | KD2-H4K8la_peak_1031 | 5.95337  |                                                     |
| 11 | 6704266 | 6704468 | KD2-H4K8la_peak_1032 | 8.6948   | MRPL17_ENSG00000158042                              |
| 11 | 8040824 | 8041133 | KD2-H4K8la_peak_1033 | 7.12014  | TUB_ENSG00000166402                                 |
| 11 | 8254394 | 8255069 | KD2-H4K8la_peak_1034 | 13.85872 |                                                     |
| 11 | 8259123 | 8259353 | KD2-H4K8la_peak_1035 | 9.02706  |                                                     |
| 11 | 8263605 | 8263953 | KD2-H4K8la_peak_1036 | 6.86458  |                                                     |
| 11 | 8305437 | 8305705 | KD2-H4K8la_peak_1037 | 8.76116  |                                                     |
| 11 | 8350875 | 8351162 | KD2-H4K8la_peak_1038 | 7.30722  |                                                     |
| 11 | 8351678 | 8351890 | KD2-H4K8la_peak_1039 | 6.3399   |                                                     |
| 11 | 8376475 | 8376787 | KD2-H4K8la_peak_1040 | 4.30663  |                                                     |
| 11 | 8703816 | 8704018 | KD2-H4K8la_peak_1041 | 6.20793  | RPL27A_ENSG00000166441                              |
| 11 | 8704458 | 8704761 | KD2-H4K8la_peak_1042 | 6.9399   | RPL27A_ENSG00000166441                              |
| 11 | 8892253 | 8892485 | KD2-H4K8la_peak_1043 | 7.12014  |                                                     |
| 11 | 9482962 | 9483167 | KD2-H4K8la_peak_1044 | 8.76082  | AC132192.1_ENSG00000268403                          |
| 11 | 9685169 | 9685376 | KD2-H4K8la_peak_1045 | 6.79079  | SWAP70_ENSG00000133789                              |
| 11 | 9779403 | 9779670 | KD2-H4K8la_peak_1046 | 9.27415  | SBF2-AS1_ENSG00000246273                            |
| 11 | 1.1E+07 | 1.1E+07 | KD2-H4K8la_peak_1047 | 7.65547  | RP11-685M7.3_ENSG00000246308;EIF4G2_ENSG00000110321 |
| 11 | 1.2E+07 | 1.2E+07 | KD2-H4K8la_peak_1048 | 7.90495  | USP47_ENSG00000170242                               |
| 11 | 1.2E+07 | 1.2E+07 | KD2-H4K8la_peak_1049 | 12.76394 |                                                     |
| 11 | 1.2E+07 | 1.2E+07 | KD2-H4K8la_peak_1050 | 10.58561 |                                                     |
| 11 | 1.3E+07 | 1.3E+07 | KD2-H4K8la_peak_1051 | 7.30722  | TEAD1_ENSG00000187079                               |
| 11 | 1.3E+07 | 1.3E+07 | KD2-H4K8la_peak_1052 | 4.53273  |                                                     |
| 11 | 1.6E+07 | 1.6E+07 | KD2-H4K8la_peak_1053 | 9.22403  |                                                     |
| 11 | 1.7E+07 | 1.7E+07 | KD2-H4K8la_peak_1054 | 6.70626  |                                                     |
| 11 | 1.7E+07 | 1.7E+07 | KD2-H4K8la_peak_1055 | 5.05146  | PLEKHA7_ENSG00000166689;OR7E14P_ENSG00000184669     |
| 11 | 1.8E+07 | 1.8E+07 | KD2-H4K8la_peak_1056 | 7.22716  | SAAL1_ENSG00000166788;HIGD1AP5_ENSG00000255254      |

|    |         |         |                      |          |                                                          |
|----|---------|---------|----------------------|----------|----------------------------------------------------------|
| 11 | 1.8E+07 | 1.8E+07 | KD2-H4K8la_peak_1057 | 11.06859 |                                                          |
| 11 | 1.9E+07 | 1.9E+07 | KD2-H4K8la_peak_1058 | 10.07718 | RP11-1081L13.4_ENSG00000254966                           |
| 11 | 2E+07   | 2E+07   | KD2-H4K8la_peak_1059 | 13.23927 |                                                          |
| 11 | 2E+07   | 2E+07   | KD2-H4K8la_peak_1060 | 14.45289 |                                                          |
| 11 | 2E+07   | 2E+07   | KD2-H4K8la_peak_1061 | 7.92775  |                                                          |
| 11 | 2.1E+07 | 2.1E+07 | KD2-H4K8la_peak_1062 | 5.60379  |                                                          |
| 11 | 2.1E+07 | 2.1E+07 | KD2-H4K8la_peak_1063 | 9.27415  |                                                          |
| 11 | 2.7E+07 | 2.7E+07 | KD2-H4K8la_peak_1064 | 8.07102  |                                                          |
| 11 | 2.7E+07 | 2.7E+07 | KD2-H4K8la_peak_1065 | 5.22084  |                                                          |
| 11 | 2.8E+07 | 2.8E+07 | KD2-H4K8la_peak_1066 | 8.37064  | LIN7C_ENSG00000148943;BDNF-AS_ENSG00000245573            |
| 11 | 3E+07   | 3E+07   | KD2-H4K8la_peak_1067 | 11.81487 | ARL14EP_ENSG00000152219                                  |
| 11 | 3.1E+07 | 3.1E+07 | KD2-H4K8la_peak_1068 | 6.36118  | MPPED2_ENSG00000066382                                   |
| 11 | 3.2E+07 | 3.2E+07 | KD2-H4K8la_peak_1069 | 8.37064  |                                                          |
| 11 | 3.3E+07 | 3.3E+07 | KD2-H4K8la_peak_1070 | 7.49467  | EIF3M_ENSG00000149100                                    |
| 11 | 3.4E+07 | 3.4E+07 | KD2-H4K8la_peak_1071 | 12.63129 | CAPRIN1_ENSG00000135387                                  |
| 11 | 3.4E+07 | 3.4E+07 | KD2-H4K8la_peak_1072 | 9.8025   |                                                          |
| 11 | 3.5E+07 | 3.5E+07 | KD2-H4K8la_peak_1073 | 7.22716  | RP4-607I7.1_ENSG00000255521;CD44_ENSG00000026508         |
| 11 | 3.6E+07 | 3.6E+07 | KD2-H4K8la_peak_1074 | 15.19386 | TRIM44_ENSG00000166326                                   |
| 11 | 4.3E+07 | 4.3E+07 | KD2-H4K8la_peak_1075 | 6.57319  |                                                          |
| 11 | 4.4E+07 | 4.4E+07 | KD2-H4K8la_peak_1076 | 11.06859 |                                                          |
| 11 | 4.4E+07 | 4.4E+07 | KD2-H4K8la_peak_1077 | 5.14476  | ALKBH3-AS1_ENSG00000244926;RP11-613D13.4_ENSG00000254409 |
| 11 | 4.4E+07 | 4.4E+07 | KD2-H4K8la_peak_1078 | 8.48577  | C11orf96_ENSG00000187479                                 |
| 11 | 4.4E+07 | 4.4E+07 | KD2-H4K8la_peak_1079 | 7.92775  | C11orf96_ENSG00000187479                                 |
| 11 | 4.4E+07 | 4.4E+07 | KD2-H4K8la_peak_1080 | 8.8621   |                                                          |
| 11 | 4.4E+07 | 4.4E+07 | KD2-H4K8la_peak_1081 | 11.15747 |                                                          |
| 11 | 4.4E+07 | 4.4E+07 | KD2-H4K8la_peak_1082 | 6.61963  |                                                          |
| 11 | 4.4E+07 | 4.4E+07 | KD2-H4K8la_peak_1083 | 15.09309 |                                                          |
| 11 | 4.4E+07 | 4.4E+07 | KD2-H4K8la_peak_1084 | 5.78071  |                                                          |
| 11 | 4.4E+07 | 4.4E+07 | KD2-H4K8la_peak_1085 | 5.30989  |                                                          |
| 11 | 4.4E+07 | 4.4E+07 | KD2-H4K8la_peak_1086 | 4.72651  |                                                          |
| 11 | 4.5E+07 | 4.5E+07 | KD2-H4K8la_peak_1087 | 6.48366  |                                                          |
| 11 | 4.5E+07 | 4.5E+07 | KD2-H4K8la_peak_1088 | 9.70817  |                                                          |
| 11 | 4.5E+07 | 4.5E+07 | KD2-H4K8la_peak_1089 | 10.36292 | RP11-45A12.1_ENSG00000255079                             |
| 11 | 4.5E+07 | 4.5E+07 | KD2-H4K8la_peak_1090 | 6.13507  | TSPAN18_ENSG00000157570                                  |
| 11 | 4.5E+07 | 4.5E+07 | KD2-H4K8la_peak_1091 | 10.04111 |                                                          |
| 11 | 4.5E+07 | 4.5E+07 | KD2-H4K8la_peak_1092 | 10.2573  |                                                          |
| 11 | 4.5E+07 | 4.5E+07 | KD2-H4K8la_peak_1093 | 5.05146  |                                                          |
| 11 | 4.5E+07 | 4.5E+07 | KD2-H4K8la_peak_1094 | 7.22716  |                                                          |
| 11 | 4.5E+07 | 4.5E+07 | KD2-H4K8la_peak_1095 | 17.22831 |                                                          |
| 11 | 4.6E+07 | 4.6E+07 | KD2-H4K8la_peak_1096 | 7.49467  |                                                          |
| 11 | 4.6E+07 | 4.6E+07 | KD2-H4K8la_peak_1097 | 6.83387  | GYLTL1B_ENSG00000165905                                  |
| 11 | 4.6E+07 | 4.6E+07 | KD2-H4K8la_peak_1098 | 4.30663  | CREB3L1_ENSG00000157613                                  |
| 11 | 4.6E+07 | 4.6E+07 | KD2-H4K8la_peak_1099 | 7.3993   | MDK_ENSG00000110492                                      |
| 11 | 4.6E+07 | 4.6E+07 | KD2-H4K8la_peak_1100 | 9.37943  | MDK_ENSG00000110492                                      |
| 11 | 4.6E+07 | 4.6E+07 | KD2-H4K8la_peak_1101 | 11.40266 |                                                          |
| 11 | 4.7E+07 | 4.7E+07 | KD2-H4K8la_peak_1102 | 9.38376  | CKAP5_ENSG00000175216;LRP4-AS1_ENSG00000247675           |



|    |         |         |                      |          |                                                                                           |
|----|---------|---------|----------------------|----------|-------------------------------------------------------------------------------------------|
| 11 | 4.7E+07 | 4.7E+07 | KD2-H4K8la_peak_1103 | 7.72421  | C11orf49_ENSG00000149179                                                                  |
| 11 | 4.7E+07 | 4.7E+07 | KD2-H4K8la_peak_1104 | 7.83588  | PAC3IN3_ENSG00000165912                                                                   |
| 11 | 4.7E+07 | 4.7E+07 | KD2-H4K8la_peak_1105 | 6.3399   | PSMC3_ENSG00000165916                                                                     |
| 11 | 4.8E+07 | 4.8E+07 | KD2-H4K8la_peak_1106 | 11.36807 | CELF1_ENSG00000149187;NDUFS3_ENSG00000213619;PTPMT1_ENSG00000110536                       |
| 11 | 4.8E+07 | 4.8E+07 | KD2-H4K8la_peak_1107 | 4.69635  | PTPRJ_ENSG00000149177                                                                     |
| 11 | 5.7E+07 | 5.7E+07 | KD2-H4K8la_peak_1108 | 9.77649  |                                                                                           |
| 11 | 5.7E+07 | 5.7E+07 | KD2-H4K8la_peak_1109 | 8.07102  | RP11-624G17.3_ENSG00000255301                                                             |
| 11 | 5.7E+07 | 5.7E+07 | KD2-H4K8la_peak_1110 | 10.11868 |                                                                                           |
| 11 | 5.7E+07 | 5.7E+07 | KD2-H4K8la_peak_1111 | 5.39166  | TIMM10_ENSG00000134809                                                                    |
| 11 | 5.7E+07 | 5.7E+07 | KD2-H4K8la_peak_1112 | 8.76116  | AP000662.4_ENSG00000254602                                                                |
| 11 | 5.7E+07 | 5.7E+07 | KD2-H4K8la_peak_1113 | 6.13507  | AP000662.4_ENSG00000254602                                                                |
| 11 | 5.7E+07 | 5.7E+07 | KD2-H4K8la_peak_1114 | 5.36015  | MED19_ENSG00000156603;TMX2_ENSG00000213593;TMX2-CTNND1_ENSG00000254462                    |
| 11 | 5.8E+07 | 5.8E+07 | KD2-H4K8la_peak_1115 | 9.27765  | ZFP91_ENSG00000186660;ZFP91-CNTF_ENSG00000255073                                          |
| 11 | 5.9E+07 | 5.9E+07 | KD2-H4K8la_peak_1116 | 7.72421  |                                                                                           |
| 11 | 5.9E+07 | 5.9E+07 | KD2-H4K8la_peak_1117 | 4.57867  |                                                                                           |
| 11 | 6E+07   | 6E+07   | KD2-H4K8la_peak_1118 | 13.20018 | MRPL16_ENSG00000166902                                                                    |
| 11 | 6.1E+07 | 6.1E+07 | KD2-H4K8la_peak_1119 | 7.12014  | CCDC86_ENSG00000110104                                                                    |
| 11 | 6.1E+07 | 6.1E+07 | KD2-H4K8la_peak_1120 | 9.6708   | RP11-881M11.1_ENSG00000256944;TMEM109_ENSG00000110108                                     |
| 11 | 6.1E+07 | 6.1E+07 | KD2-H4K8la_peak_1121 | 5.56351  | TMEM132A_ENSG00000006118                                                                  |
| 11 | 6.1E+07 | 6.1E+07 | KD2-H4K8la_peak_1122 | 5.99671  | VWCE_ENSG00000167992                                                                      |
| 11 | 6.1E+07 | 6.1E+07 | KD2-H4K8la_peak_1123 | 5.66328  |                                                                                           |
| 11 | 6.1E+07 | 6.1E+07 | KD2-H4K8la_peak_1124 | 9.49266  | TMEM216_ENSG00000187049                                                                   |
| 11 | 6.1E+07 | 6.1E+07 | KD2-H4K8la_peak_1125 | 7.3993   | CPSF7_ENSG00000149532;RP11-286N22.8_ENSG00000256591;SDHAF2_ENSG00000167985                |
| 11 | 6.1E+07 | 6.1E+07 | KD2-H4K8la_peak_1126 | 5.47284  |                                                                                           |
| 11 | 6.2E+07 | 6.2E+07 | KD2-H4K8la_peak_1127 | 8.43222  | MYRF_ENSG00000124920                                                                      |
| 11 | 6.2E+07 | 6.2E+07 | KD2-H4K8la_peak_1128 | 9.14903  | TMEM258_ENSG00000134825;MIR611_ENSG00000207601;FEN1_ENSG00000168496;FADS2_ENSG00000134824 |
| 11 | 6.2E+07 | 6.2E+07 | KD2-H4K8la_peak_1129 | 9.78176  | FADS1_ENSG00000149485                                                                     |
| 11 | 6.2E+07 | 6.2E+07 | KD2-H4K8la_peak_1130 | 5.05146  | FADS3_ENSG00000221968                                                                     |
| 11 | 6.2E+07 | 6.2E+07 | KD2-H4K8la_peak_1131 | 7.13185  | FADS3_ENSG00000221968                                                                     |
| 11 | 6.2E+07 | 6.2E+07 | KD2-H4K8la_peak_1132 | 6.11881  | BEST1_ENSG00000167995                                                                     |
| 11 | 6.2E+07 | 6.2E+07 | KD2-H4K8la_peak_1133 | 9.61894  | INCENP_ENSG00000149503                                                                    |
| 11 | 6.2E+07 | 6.2E+07 | KD2-H4K8la_peak_1134 | 8.79494  |                                                                                           |
| 11 | 6.2E+07 | 6.2E+07 | KD2-H4K8la_peak_1135 | 5.83285  | MIR3654_ENSG00000255508;TUT1_ENSG00000149016                                              |
| 11 | 6.2E+07 | 6.2E+07 | KD2-H4K8la_peak_1136 | 5.76341  | MTA2_ENSG00000149480                                                                      |
| 11 | 6.2E+07 | 6.2E+07 | KD2-H4K8la_peak_1137 | 6.64804  | MTA2_ENSG00000149480                                                                      |
| 11 | 6.2E+07 | 6.2E+07 | KD2-H4K8la_peak_1138 | 13.47548 | BSCL2_ENSG00000168000                                                                     |
| 11 | 6.3E+07 | 6.3E+07 | KD2-H4K8la_peak_1139 | 5.83285  |                                                                                           |
| 11 | 6.4E+07 | 6.4E+07 | KD2-H4K8la_peak_1140 | 17.45444 | C11orf95_ENSG00000188070;RP11-466C23.4_ENSG00000255651                                    |
| 11 | 6.4E+07 | 6.4E+07 | KD2-H4K8la_peak_1141 | 12.32641 | RCOR2_ENSG00000167771                                                                     |
| 11 | 6.4E+07 | 6.4E+07 | KD2-H4K8la_peak_1142 | 6.68593  |                                                                                           |
| 11 | 6.4E+07 | 6.4E+07 | KD2-H4K8la_peak_1143 | 6.25288  |                                                                                           |
| 11 | 6.4E+07 | 6.4E+07 | KD2-H4K8la_peak_1144 | 5.43278  |                                                                                           |
| 11 | 6.4E+07 | 6.4E+07 | KD2-H4K8la_peak_1145 | 7.61975  | OTUB1_ENSG00000167770                                                                     |
| 11 | 6.4E+07 | 6.4E+07 | KD2-H4K8la_peak_1146 | 7.30722  |                                                                                           |
| 11 | 6.4E+07 | 6.4E+07 | KD2-H4K8la_peak_1147 | 7.98235  |                                                                                           |
| 11 | 6.4E+07 | 6.4E+07 | KD2-H4K8la_peak_1148 | 8.71024  |                                                                                           |

|    |         |         |                      |          |                                                        |
|----|---------|---------|----------------------|----------|--------------------------------------------------------|
| 11 | 6.4E+07 | 6.4E+07 | KD2-H4K8la_peak_1149 | 6.37643  |                                                        |
| 11 | 6.4E+07 | 6.4E+07 | KD2-H4K8la_peak_1150 | 6.86458  |                                                        |
| 11 | 6.4E+07 | 6.4E+07 | KD2-H4K8la_peak_1151 | 8.66164  |                                                        |
| 11 | 6.4E+07 | 6.4E+07 | KD2-H4K8la_peak_1152 | 13.04289 |                                                        |
| 11 | 6.4E+07 | 6.4E+07 | KD2-H4K8la_peak_1153 | 9.02706  |                                                        |
| 11 | 6.4E+07 | 6.4E+07 | KD2-H4K8la_peak_1154 | 4.55308  |                                                        |
| 11 | 6.4E+07 | 6.4E+07 | KD2-H4K8la_peak_1155 | 6.83387  |                                                        |
| 11 | 6.4E+07 | 6.4E+07 | KD2-H4K8la_peak_1156 | 7.81267  | MACROD1_ENSG00000133315                                |
| 11 | 6.4E+07 | 6.4E+07 | KD2-H4K8la_peak_1157 | 8.07044  | MACROD1_ENSG00000133315                                |
| 11 | 6.4E+07 | 6.4E+07 | KD2-H4K8la_peak_1158 | 6.31081  | RP11-783K16.14_ENSG00000256116;VEGFB_ENSG00000173511   |
| 11 | 6.4E+07 | 6.4E+07 | KD2-H4K8la_peak_1159 | 7.61975  | FKBP2_ENSG00000173486                                  |
| 11 | 6.4E+07 | 6.4E+07 | KD2-H4K8la_peak_1160 | 10.00612 | PPP1R14B_ENSG00000173457;RP11-783K16.5_ENSG00000256940 |
| 11 | 6.4E+07 | 6.4E+07 | KD2-H4K8la_peak_1161 | 7.90495  | GPR137_ENSG00000173264                                 |
| 11 | 6.4E+07 | 6.4E+07 | KD2-H4K8la_peak_1162 | 5.98041  | GPR137_ENSG00000173264                                 |
| 11 | 6.4E+07 | 6.4E+07 | KD2-H4K8la_peak_1163 | 10.20357 | BAD_ENSG00000002330                                    |
| 11 | 6.4E+07 | 6.4E+07 | KD2-H4K8la_peak_1164 | 5.12859  | RPS6KA4_ENSG00000162302                                |
| 11 | 6.4E+07 | 6.4E+07 | KD2-H4K8la_peak_1165 | 7.49467  |                                                        |
| 11 | 6.4E+07 | 6.4E+07 | KD2-H4K8la_peak_1166 | 8.12466  |                                                        |
| 11 | 6.4E+07 | 6.4E+07 | KD2-H4K8la_peak_1167 | 19.53802 | NRXN2_ENSG00000110076                                  |
| 11 | 6.5E+07 | 6.5E+07 | KD2-H4K8la_peak_1168 | 8.13557  | RASGRP2_ENSG00000068831                                |
| 11 | 6.5E+07 | 6.5E+07 | KD2-H4K8la_peak_1169 | 15.75739 | SF1_ENSG00000168066;AP001462.6_ENSG00000269038         |
| 11 | 6.5E+07 | 6.5E+07 | KD2-H4K8la_peak_1170 | 11.15747 | ARL2_ENSG00000213465;RP11-399J13.3_ENSG00000273003     |
| 11 | 6.5E+07 | 6.5E+07 | KD2-H4K8la_peak_1171 | 6.86458  | CDCA5_ENSG00000146670;ZFPL1_ENSG00000162300            |
| 11 | 6.5E+07 | 6.5E+07 | KD2-H4K8la_peak_1172 | 6.64804  |                                                        |
| 11 | 6.5E+07 | 6.5E+07 | KD2-H4K8la_peak_1173 | 5.99671  |                                                        |
| 11 | 6.5E+07 | 6.5E+07 | KD2-H4K8la_peak_1174 | 6.68593  | ZNHIT2_ENSG00000174276;AP003068.12_ENSG00000255173     |
| 11 | 6.5E+07 | 6.5E+07 | KD2-H4K8la_peak_1175 | 13.3186  | AP003068.23_ENSG00000254614;CAPN1_ENSG00000014216      |
| 11 | 6.5E+07 | 6.5E+07 | KD2-H4K8la_peak_1176 | 7.13237  |                                                        |
| 11 | 6.5E+07 | 6.5E+07 | KD2-H4K8la_peak_1177 | 5.43278  |                                                        |
| 11 | 6.5E+07 | 6.5E+07 | KD2-H4K8la_peak_1178 | 4.30663  | NEAT1_ENSG00000245532                                  |
| 11 | 6.5E+07 | 6.5E+07 | KD2-H4K8la_peak_1179 | 8.944    |                                                        |
| 11 | 6.5E+07 | 6.5E+07 | KD2-H4K8la_peak_1180 | 9.61894  | LTBP3_ENSG00000168056                                  |
| 11 | 6.5E+07 | 6.5E+07 | KD2-H4K8la_peak_1181 | 5.33301  | EHBPI1L1_ENSG00000173442                               |
| 11 | 6.5E+07 | 6.5E+07 | KD2-H4K8la_peak_1182 | 6.81115  | MAP3K11_ENSG00000173327;PCNXL3_ENSG00000197136         |
| 11 | 6.6E+07 | 6.6E+07 | KD2-H4K8la_peak_1183 | 11.98921 | AP5B1_ENSG00000254470                                  |
| 11 | 6.6E+07 | 6.6E+07 | KD2-H4K8la_peak_1184 | 5.26241  | EFEMP2_ENSG00000172638                                 |
| 11 | 6.6E+07 | 6.6E+07 | KD2-H4K8la_peak_1185 | 10.70453 |                                                        |
| 11 | 6.6E+07 | 6.6E+07 | KD2-H4K8la_peak_1186 | 6.28686  | GAL3ST3_ENSG00000175229                                |
| 11 | 6.6E+07 | 6.6E+07 | KD2-H4K8la_peak_1187 | 8.12466  | SF3B2_ENSG00000087365                                  |
| 11 | 6.6E+07 | 6.6E+07 | KD2-H4K8la_peak_1188 | 20.66643 | RP11-867G23.13_ENSG00000254458                         |
| 11 | 6.6E+07 | 6.6E+07 | KD2-H4K8la_peak_1189 | 6.03112  | CD248_ENSG00000174807                                  |
| 11 | 6.6E+07 | 6.6E+07 | KD2-H4K8la_peak_1190 | 5.83285  | CD248_ENSG00000174807                                  |
| 11 | 6.6E+07 | 6.6E+07 | KD2-H4K8la_peak_1191 | 8.76116  | BRMS1_ENSG00000174744                                  |
| 11 | 6.6E+07 | 6.6E+07 | KD2-H4K8la_peak_1192 | 9.05604  | SLC29A2_ENSG00000174669                                |
| 11 | 6.6E+07 | 6.6E+07 | KD2-H4K8la_peak_1193 | 10.49982 | SPTBN2_ENSG00000173898                                 |
| 11 | 6.7E+07 | 6.7E+07 | KD2-H4K8la_peak_1194 | 7.78021  | LRFN4_ENSG00000173621                                  |

|    |         |         |                      |          |                                                                                |
|----|---------|---------|----------------------|----------|--------------------------------------------------------------------------------|
| 11 | 6.7E+07 | 6.7E+07 | KD2-H4K8la_peak_1195 | 8.76116  | KDM2A_ENSG00000173120                                                          |
| 11 | 6.7E+07 | 6.7E+07 | KD2-H4K8la_peak_1196 | 8.71041  |                                                                                |
| 11 | 6.7E+07 | 6.7E+07 | KD2-H4K8la_peak_1197 | 7.12014  |                                                                                |
| 11 | 6.7E+07 | 6.7E+07 | KD2-H4K8la_peak_1198 | 8.59373  | SSH3_ENSG00000172830                                                           |
| 11 | 6.7E+07 | 6.7E+07 | KD2-H4K8la_peak_1199 | 8.59735  |                                                                                |
| 11 | 6.7E+07 | 6.7E+07 | KD2-H4K8la_peak_1200 | 6.88801  |                                                                                |
| 11 | 6.7E+07 | 6.7E+07 | KD2-H4K8la_peak_1201 | 6.31081  | CARNS1_ENSG00000172508                                                         |
| 11 | 6.7E+07 | 6.7E+07 | KD2-H4K8la_peak_1202 | 7.49467  |                                                                                |
| 11 | 6.7E+07 | 6.7E+07 | KD2-H4K8la_peak_1203 | 5.28047  | AIP_ENSG00000110711                                                            |
| 11 | 6.7E+07 | 6.7E+07 | KD2-H4K8la_peak_1204 | 10.20357 | CDK2AP2_ENSG00000167797                                                        |
| 11 | 6.7E+07 | 6.7E+07 | KD2-H4K8la_peak_1205 | 11.65011 | GSTP1_ENSG00000084207                                                          |
| 11 | 6.7E+07 | 6.7E+07 | KD2-H4K8la_peak_1206 | 9.86881  | C11orf72_ENSG00000184224;RP11-655M14.12_ENSG00000255119;NDUFV1_ENSG00000167792 |
| 11 | 6.8E+07 | 6.8E+07 | KD2-H4K8la_peak_1207 | 9.38376  | UNC93B1_ENSG00000110057                                                        |
| 11 | 6.8E+07 | 6.8E+07 | KD2-H4K8la_peak_1208 | 9.61894  |                                                                                |
| 11 | 6.8E+07 | 6.8E+07 | KD2-H4K8la_peak_1209 | 16.68107 | SUV420H1_ENSG00000110066                                                       |
| 11 | 6.8E+07 | 6.8E+07 | KD2-H4K8la_peak_1210 | 10.58561 | LRP5_ENSG00000162337                                                           |
| 11 | 6.8E+07 | 6.8E+07 | KD2-H4K8la_peak_1211 | 7.92775  |                                                                                |
| 11 | 6.8E+07 | 6.8E+07 | KD2-H4K8la_peak_1212 | 6.77116  |                                                                                |
| 11 | 6.8E+07 | 6.8E+07 | KD2-H4K8la_peak_1213 | 9.27415  |                                                                                |
| 11 | 6.8E+07 | 6.8E+07 | KD2-H4K8la_peak_1214 | 10.47118 |                                                                                |
| 11 | 6.8E+07 | 6.8E+07 | KD2-H4K8la_peak_1215 | 12.43263 | GAL_ENSG00000069482                                                            |
| 11 | 6.9E+07 | 6.9E+07 | KD2-H4K8la_peak_1216 | 7.12014  |                                                                                |
| 11 | 6.9E+07 | 6.9E+07 | KD2-H4K8la_peak_1217 | 7.61975  | TPCN2_ENSG00000162341                                                          |
| 11 | 6.9E+07 | 6.9E+07 | KD2-H4K8la_peak_1218 | 4.90979  | RP11-554A11.9_ENSG00000259799                                                  |
| 11 | 6.9E+07 | 6.9E+07 | KD2-H4K8la_peak_1219 | 23.64423 | RP11-554A11.9_ENSG00000259799                                                  |
| 11 | 6.9E+07 | 6.9E+07 | KD2-H4K8la_peak_1220 | 6.86458  |                                                                                |
| 11 | 6.9E+07 | 6.9E+07 | KD2-H4K8la_peak_1221 | 11.85985 |                                                                                |
| 11 | 6.9E+07 | 6.9E+07 | KD2-H4K8la_peak_1222 | 5.99671  |                                                                                |
| 11 | 6.9E+07 | 6.9E+07 | KD2-H4K8la_peak_1223 | 11.28887 |                                                                                |
| 11 | 6.9E+07 | 6.9E+07 | KD2-H4K8la_peak_1224 | 6.0136   |                                                                                |
| 11 | 6.9E+07 | 6.9E+07 | KD2-H4K8la_peak_1225 | 7.13237  |                                                                                |
| 11 | 6.9E+07 | 6.9E+07 | KD2-H4K8la_peak_1226 | 13.29476 |                                                                                |
| 11 | 7E+07   | 7E+07   | KD2-H4K8la_peak_1227 | 8.16787  | FADD_ENSG00000168040                                                           |
| 11 | 7.1E+07 | 7.1E+07 | KD2-H4K8la_peak_1228 | 6.32736  |                                                                                |
| 11 | 7.1E+07 | 7.1E+07 | KD2-H4K8la_peak_1229 | 10.97039 | FAM86C1_ENSG00000158483                                                        |
| 11 | 7.2E+07 | 7.2E+07 | KD2-H4K8la_peak_1230 | 8.76116  | NUMA1_ENSG00000137497;LRTOMT_ENSG00000184154                                   |
| 11 | 7.2E+07 | 7.2E+07 | KD2-H4K8la_peak_1231 | 6.89612  | LAMTOR1_ENSG00000149357;snoU13_ENSG00000238768                                 |
| 11 | 7.2E+07 | 7.2E+07 | KD2-H4K8la_peak_1232 | 8.487    | ANAPC15_ENSG00000110200                                                        |
| 11 | 7.2E+07 | 7.2E+07 | KD2-H4K8la_peak_1233 | 8.59561  |                                                                                |
| 11 | 7.2E+07 | 7.2E+07 | KD2-H4K8la_peak_1234 | 7.86398  |                                                                                |
| 11 | 7.2E+07 | 7.2E+07 | KD2-H4K8la_peak_1235 | 7.61975  | PHOX2A_ENSG00000165462                                                         |
| 11 | 7.2E+07 | 7.2E+07 | KD2-H4K8la_peak_1236 | 7.51014  |                                                                                |
| 11 | 7.2E+07 | 7.2E+07 | KD2-H4K8la_peak_1237 | 9.0413   |                                                                                |
| 11 | 7.2E+07 | 7.2E+07 | KD2-H4K8la_peak_1238 | 5.67034  |                                                                                |
| 11 | 7.2E+07 | 7.2E+07 | KD2-H4K8la_peak_1239 | 9.54333  |                                                                                |
| 11 | 7.3E+07 | 7.3E+07 | KD2-H4K8la_peak_1240 | 8.3574   |                                                                                |

|    |         |         |                      |          |                                                                        |
|----|---------|---------|----------------------|----------|------------------------------------------------------------------------|
| 11 | 7.3E+07 | 7.3E+07 | KD2-H4K8la_peak_1241 | 6.43694  |                                                                        |
| 11 | 7.3E+07 | 7.3E+07 | KD2-H4K8la_peak_1242 | 15.53091 | RAB6A_ENSG00000175582;RP11-707G14.1_ENSG00000256034                    |
| 11 | 7.3E+07 | 7.3E+07 | KD2-H4K8la_peak_1243 | 13.73665 | RAB6A_ENSG00000175582                                                  |
| 11 | 7.4E+07 | 7.4E+07 | KD2-H4K8la_peak_1244 | 13.27013 | LIPT2_ENSG00000175536;AP001372.2_ENSG00000254837;POLD3_ENSG00000077514 |
| 11 | 7.5E+07 | 7.5E+07 | KD2-H4K8la_peak_1245 | 10.28981 |                                                                        |
| 11 | 7.5E+07 | 7.5E+07 | KD2-H4K8la_peak_1246 | 5.89088  |                                                                        |
| 11 | 7.5E+07 | 7.5E+07 | KD2-H4K8la_peak_1247 | 6.75222  | ARRB1_ENSG00000137486                                                  |
| 11 | 7.5E+07 | 7.5E+07 | KD2-H4K8la_peak_1248 | 8.65988  | RPS3_ENSG00000149273                                                   |
| 11 | 7.5E+07 | 7.5E+07 | KD2-H4K8la_peak_1249 | 9.61894  | KLHL35_ENSG00000149243                                                 |
| 11 | 7.5E+07 | 7.5E+07 | KD2-H4K8la_peak_1250 | 14.15376 | CTD-2530H12.4_ENSG00000255326                                          |
| 11 | 7.5E+07 | 7.5E+07 | KD2-H4K8la_peak_1251 | 6.61963  |                                                                        |
| 11 | 7.6E+07 | 7.6E+07 | KD2-H4K8la_peak_1252 | 8.16787  |                                                                        |
| 11 | 7.7E+07 | 7.7E+07 | KD2-H4K8la_peak_1253 | 5.83285  |                                                                        |
| 11 | 7.7E+07 | 7.7E+07 | KD2-H4K8la_peak_1254 | 7.60756  | PAK1_ENSG00000149269;DKFZP434E1119_ENSG00000268635                     |
| 11 | 7.8E+07 | 7.8E+07 | KD2-H4K8la_peak_1255 | 7.92775  | ALG8_ENSG00000159063;KCTD21-AS1_ENSG00000246174                        |
| 11 | 7.8E+07 | 7.8E+07 | KD2-H4K8la_peak_1256 | 7.14575  |                                                                        |
| 11 | 7.9E+07 | 7.9E+07 | KD2-H4K8la_peak_1257 | 8.73956  |                                                                        |
| 11 | 8.6E+07 | 8.6E+07 | KD2-H4K8la_peak_1258 | 7.41831  | AP000974.1_ENSG00000215504;CCDC83_ENSG00000150676                      |
| 11 | 8.6E+07 | 8.6E+07 | KD2-H4K8la_peak_1259 | 5.05146  | ME3_ENSG00000151376                                                    |
| 11 | 9E+07   | 9E+07   | KD2-H4K8la_peak_1260 | 7.83588  | CHORDC1_ENSG00000110172                                                |
| 11 | 9.3E+07 | 9.3E+07 | KD2-H4K8la_peak_1261 | 6.98136  | CCDC67_ENSG00000165325                                                 |
| 11 | 9.3E+07 | 9.3E+07 | KD2-H4K8la_peak_1262 | 7.77341  | KIAA1731_ENSG00000166004                                               |
| 11 | 9.4E+07 | 9.4E+07 | KD2-H4K8la_peak_1263 | 8.44557  | TAF1D_ENSG00000166012;MED17_ENSG00000042429                            |
| 11 | 9.4E+07 | 9.4E+07 | KD2-H4K8la_peak_1264 | 10.47118 | VSTM5_ENSG00000214376                                                  |
| 11 | 9.4E+07 | 9.4E+07 | KD2-H4K8la_peak_1265 | 8.76082  | PANX1_ENSG00000110218                                                  |
| 11 | 9.5E+07 | 9.5E+07 | KD2-H4K8la_peak_1266 | 11.40266 |                                                                        |
| 11 | 9.5E+07 | 9.5E+07 | KD2-H4K8la_peak_1267 | 10.20357 | SRSF8_ENSG00000180771;SRSF8_ENSG00000271885                            |
| 11 | 9.6E+07 | 9.6E+07 | KD2-H4K8la_peak_1268 | 10.99007 |                                                                        |
| 11 | 9.8E+07 | 9.8E+07 | KD2-H4K8la_peak_1269 | 5.67034  |                                                                        |
| 11 | 9.8E+07 | 9.8E+07 | KD2-H4K8la_peak_1270 | 8.77936  |                                                                        |
| 11 | 1E+08   | 1E+08   | KD2-H4K8la_peak_1271 | 5.36015  | RP11-315O6.1_ENSG00000255337                                           |
| 11 | 1.1E+08 | 1.1E+08 | KD2-H4K8la_peak_1272 | 8.35736  | MSANTD4_ENSG00000170903                                                |
| 11 | 1.1E+08 | 1.1E+08 | KD2-H4K8la_peak_1273 | 9.66714  | SLC35F2_ENSG00000110660;RAB39A_ENSG00000179331                         |
| 11 | 1.1E+08 | 1.1E+08 | KD2-H4K8la_peak_1274 | 5.05146  | KDEL2_ENSG00000178202                                                  |
| 11 | 1.1E+08 | 1.1E+08 | KD2-H4K8la_peak_1275 | 10.73719 | KDEL2_ENSG00000178202                                                  |
| 11 | 1.1E+08 | 1.1E+08 | KD2-H4K8la_peak_1276 | 5.36015  | DDX10_ENSG00000178105                                                  |
| 11 | 1.1E+08 | 1.1E+08 | KD2-H4K8la_peak_1277 | 7.72421  |                                                                        |
| 11 | 1.1E+08 | 1.1E+08 | KD2-H4K8la_peak_1278 | 10.83873 | COLCA2_ENSG00000214290                                                 |
| 11 | 1.1E+08 | 1.1E+08 | KD2-H4K8la_peak_1279 | 7.23932  | PTS_ENSG00000150787                                                    |
| 11 | 1.1E+08 | 1.1E+08 | KD2-H4K8la_peak_1280 | 10.49169 |                                                                        |
| 11 | 1.1E+08 | 1.1E+08 | KD2-H4K8la_peak_1281 | 8.96921  |                                                                        |
| 11 | 1.1E+08 | 1.1E+08 | KD2-H4K8la_peak_1282 | 6.67305  |                                                                        |
| 11 | 1.2E+08 | 1.2E+08 | KD2-H4K8la_peak_1283 | 5.83285  | RP11-136I14.5_ENSG00000255689                                          |
| 11 | 1.2E+08 | 1.2E+08 | KD2-H4K8la_peak_1284 | 8.76116  | AP000797.3_ENSG00000256717                                             |
| 11 | 1.2E+08 | 1.2E+08 | KD2-H4K8la_peak_1285 | 7.12014  |                                                                        |
| 11 | 1.2E+08 | 1.2E+08 | KD2-H4K8la_peak_1286 | 6.3399   |                                                                        |

|    |         |         |                      |          |                                                    |
|----|---------|---------|----------------------|----------|----------------------------------------------------|
| 11 | 1.2E+08 | 1.2E+08 | KD2-H4K8la_peak_1287 | 8.12466  | LINC00900_ENSG00000246100                          |
| 11 | 1.2E+08 | 1.2E+08 | KD2-H4K8la_peak_1288 | 4.86896  |                                                    |
| 11 | 1.2E+08 | 1.2E+08 | KD2-H4K8la_peak_1289 | 5.05146  |                                                    |
| 11 | 1.2E+08 | 1.2E+08 | KD2-H4K8la_peak_1290 | 7.59874  |                                                    |
| 11 | 1.2E+08 | 1.2E+08 | KD2-H4K8la_peak_1291 | 4.6555   | AP001891.1_ENSG00000236437                         |
| 11 | 1.2E+08 | 1.2E+08 | KD2-H4K8la_peak_1292 | 5.43278  |                                                    |
| 11 | 1.2E+08 | 1.2E+08 | KD2-H4K8la_peak_1293 | 8.80046  | APOA5_ENSG00000110243                              |
| 11 | 1.2E+08 | 1.2E+08 | KD2-H4K8la_peak_1294 | 10.97039 | SIK3_ENSG00000160584;AP000936.4_ENSG00000224077    |
| 11 | 1.2E+08 | 1.2E+08 | KD2-H4K8la_peak_1295 | 6.2278   | BACE1_ENSG00000186318                              |
| 11 | 1.2E+08 | 1.2E+08 | KD2-H4K8la_peak_1296 | 6.96161  |                                                    |
| 11 | 1.2E+08 | 1.2E+08 | KD2-H4K8la_peak_1297 | 9.9701   |                                                    |
| 11 | 1.2E+08 | 1.2E+08 | KD2-H4K8la_peak_1298 | 8.76116  |                                                    |
| 11 | 1.2E+08 | 1.2E+08 | KD2-H4K8la_peak_1299 | 4.85784  |                                                    |
| 11 | 1.2E+08 | 1.2E+08 | KD2-H4K8la_peak_1300 | 9.05604  | DSCAML1_ENSG00000177103                            |
| 11 | 1.2E+08 | 1.2E+08 | KD2-H4K8la_peak_1301 | 7.72421  | MPZL3_ENSG00000160588                              |
| 11 | 1.2E+08 | 1.2E+08 | KD2-H4K8la_peak_1302 | 4.30663  | UBE4A_ENSG00000110344                              |
| 11 | 1.2E+08 | 1.2E+08 | KD2-H4K8la_peak_1303 | 8.37064  | RP11-770J1.5_ENSG00000254873;ATP5L_ENSG00000167283 |
| 11 | 1.2E+08 | 1.2E+08 | KD2-H4K8la_peak_1304 | 14.15376 | DDX6_ENSG00000110367                               |
| 11 | 1.2E+08 | 1.2E+08 | KD2-H4K8la_peak_1305 | 9.38376  | DDX6_ENSG00000110367                               |
| 11 | 1.2E+08 | 1.2E+08 | KD2-H4K8la_peak_1306 | 12.1221  | SLC37A4_ENSG00000137700                            |
| 11 | 1.2E+08 | 1.2E+08 | KD2-H4K8la_peak_1307 | 7.51014  | H2AFX_ENSG00000188486                              |
| 11 | 1.2E+08 | 1.2E+08 | KD2-H4K8la_peak_1308 | 6.2278   |                                                    |
| 11 | 1.2E+08 | 1.2E+08 | KD2-H4K8la_peak_1309 | 9.35473  |                                                    |
| 11 | 1.2E+08 | 1.2E+08 | KD2-H4K8la_peak_1310 | 9.27415  |                                                    |
| 11 | 1.2E+08 | 1.2E+08 | KD2-H4K8la_peak_1311 | 4.30663  |                                                    |
| 11 | 1.2E+08 | 1.2E+08 | KD2-H4K8la_peak_1312 | 5.05146  |                                                    |
| 11 | 1.2E+08 | 1.2E+08 | KD2-H4K8la_peak_1313 | 6.25495  |                                                    |
| 11 | 1.2E+08 | 1.2E+08 | KD2-H4K8la_peak_1314 | 5.33301  |                                                    |
| 11 | 1.2E+08 | 1.2E+08 | KD2-H4K8la_peak_1315 | 6.96161  |                                                    |
| 11 | 1.2E+08 | 1.2E+08 | KD2-H4K8la_peak_1316 | 8.43222  |                                                    |
| 11 | 1.2E+08 | 1.2E+08 | KD2-H4K8la_peak_1317 | 6.46253  |                                                    |
| 11 | 1.2E+08 | 1.2E+08 | KD2-H4K8la_peak_1318 | 5.21483  | AP000679.2_ENSG00000176984                         |
| 11 | 1.2E+08 | 1.2E+08 | KD2-H4K8la_peak_1319 | 13.29266 |                                                    |
| 11 | 1.2E+08 | 1.2E+08 | KD2-H4K8la_peak_1320 | 8.8263   |                                                    |
| 11 | 1.2E+08 | 1.2E+08 | KD2-H4K8la_peak_1321 | 8.7731   |                                                    |
| 11 | 1.2E+08 | 1.2E+08 | KD2-H4K8la_peak_1322 | 6.16656  |                                                    |
| 11 | 1.2E+08 | 1.2E+08 | KD2-H4K8la_peak_1323 | 6.13507  | TBCEL_ENSG00000154114                              |
| 11 | 1.2E+08 | 1.2E+08 | KD2-H4K8la_peak_1324 | 9.27765  |                                                    |
| 11 | 1.2E+08 | 1.2E+08 | KD2-H4K8la_peak_1325 | 7.61975  | CLMP_ENSG00000166250                               |
| 11 | 1.2E+08 | 1.2E+08 | KD2-H4K8la_peak_1326 | 16.45749 | CLMP_ENSG00000166250                               |
| 11 | 1.2E+08 | 1.2E+08 | KD2-H4K8la_peak_1327 | 6.39807  |                                                    |
| 11 | 1.2E+08 | 1.2E+08 | KD2-H4K8la_peak_1328 | 10.02595 |                                                    |
| 11 | 1.2E+08 | 1.2E+08 | KD2-H4K8la_peak_1329 | 7.51302  | TMEM218_ENSG00000150433;KRT18P59_ENSG00000187686   |
| 11 | 1.3E+08 | 1.3E+08 | KD2-H4K8la_peak_1330 | 8.15906  | EI24_ENSG00000149547                               |
| 11 | 1.3E+08 | 1.3E+08 | KD2-H4K8la_peak_1331 | 12.83096 | EI24_ENSG00000149547                               |
| 11 | 1.3E+08 | 1.3E+08 | KD2-H4K8la_peak_1332 | 8.23729  | CHEK1_ENSG00000149554                              |

|    |         |         |                      |          |                                                               |
|----|---------|---------|----------------------|----------|---------------------------------------------------------------|
| 11 | 1.3E+08 | 1.3E+08 | KD2-H4K8la_peak_1333 | 6.36286  |                                                               |
| 11 | 1.3E+08 | 1.3E+08 | KD2-H4K8la_peak_1334 | 6.2278   | CDON_ENSG00000064309                                          |
| 11 | 1.3E+08 | 1.3E+08 | KD2-H4K8la_peak_1335 | 8.37064  |                                                               |
| 11 | 1.3E+08 | 1.3E+08 | KD2-H4K8la_peak_1336 | 6.28686  |                                                               |
| 11 | 1.3E+08 | 1.3E+08 | KD2-H4K8la_peak_1337 | 5.41777  |                                                               |
| 11 | 1.3E+08 | 1.3E+08 | KD2-H4K8la_peak_1338 | 10.04111 |                                                               |
| 11 | 1.3E+08 | 1.3E+08 | KD2-H4K8la_peak_1339 | 5.36015  |                                                               |
| 11 | 1.3E+08 | 1.3E+08 | KD2-H4K8la_peak_1340 | 10.73332 | ST3GAL4_ENSG00000110080                                       |
| 11 | 1.3E+08 | 1.3E+08 | KD2-H4K8la_peak_1341 | 7.72519  |                                                               |
| 11 | 1.3E+08 | 1.3E+08 | KD2-H4K8la_peak_1342 | 6.03964  |                                                               |
| 11 | 1.3E+08 | 1.3E+08 | KD2-H4K8la_peak_1343 | 9.94613  |                                                               |
| 11 | 1.3E+08 | 1.3E+08 | KD2-H4K8la_peak_1344 | 6.70626  | RP11-702B10.2_ENSG00000273415                                 |
| 11 | 1.3E+08 | 1.3E+08 | KD2-H4K8la_peak_1345 | 11.7362  |                                                               |
| 11 | 1.3E+08 | 1.3E+08 | KD2-H4K8la_peak_1346 | 7.13237  |                                                               |
| 11 | 1.3E+08 | 1.3E+08 | KD2-H4K8la_peak_1347 | 10.27876 | PRDM10_ENSG00000170325;LINC00167_ENSG00000233220              |
| 11 | 1.3E+08 | 1.3E+08 | KD2-H4K8la_peak_1348 | 8.37064  | APLP2_ENSG00000084234                                         |
| 11 | 1.3E+08 | 1.3E+08 | KD2-H4K8la_peak_1349 | 6.70626  | SNX19_ENSG00000120451                                         |
| 11 | 1.3E+08 | 1.3E+08 | KD2-H4K8la_peak_1350 | 6.97699  |                                                               |
| 11 | 1.3E+08 | 1.3E+08 | KD2-H4K8la_peak_1351 | 11.52725 |                                                               |
| 11 | 1.3E+08 | 1.3E+08 | KD2-H4K8la_peak_1352 | 7.90495  |                                                               |
| 11 | 1.3E+08 | 1.3E+08 | KD2-H4K8la_peak_1353 | 5.83285  | IGSF9B_ENSG00000080854;AP000911.1_ENSG00000264674             |
| 12 | 73831   | 74121   | KD2-H4K8la_peak_1354 | 5.79784  | AC215219.1_ENSG00000238823;ABC7-42389800N19.1_ENSG00000226210 |
| 12 | 284268  | 284527  | KD2-H4K8la_peak_1355 | 7.06427  |                                                               |
| 12 | 286751  | 287008  | KD2-H4K8la_peak_1356 | 6.68593  |                                                               |
| 12 | 679781  | 680150  | KD2-H4K8la_peak_1357 | 9.00481  |                                                               |
| 12 | 701577  | 701815  | KD2-H4K8la_peak_1358 | 6.89612  |                                                               |
| 12 | 1058483 | 1058770 | KD2-H4K8la_peak_1359 | 9.90319  |                                                               |
| 12 | 1739302 | 1739506 | KD2-H4K8la_peak_1360 | 4.75945  |                                                               |
| 12 | 1752445 | 1752754 | KD2-H4K8la_peak_1361 | 12.92115 |                                                               |
| 12 | 1905635 | 1905837 | KD2-H4K8la_peak_1362 | 6.3399   |                                                               |
| 12 | 1913961 | 1914399 | KD2-H4K8la_peak_1363 | 8.26997  |                                                               |
| 12 | 1935735 | 1935969 | KD2-H4K8la_peak_1364 | 7.26721  |                                                               |
| 12 | 3862306 | 3862614 | KD2-H4K8la_peak_1365 | 9.11321  |                                                               |
| 12 | 3981865 | 3982198 | KD2-H4K8la_peak_1366 | 5.16795  | PARP11_ENSG00000111224;RP11-664D1.1_ENSG00000256862           |
| 12 | 6387421 | 6387831 | KD2-H4K8la_peak_1367 | 10.04111 |                                                               |
| 12 | 6602114 | 6602322 | KD2-H4K8la_peak_1368 | 4.30663  | MRPL51_ENSG00000111639;NCAPD2_ENSG00000010292                 |
| 12 | 6642780 | 6642985 | KD2-H4K8la_peak_1369 | 10.49982 | RP5-940J5.3_ENSG00000255966;GAPDH_ENSG00000111640             |
| 12 | 6716265 | 6716483 | KD2-H4K8la_peak_1370 | 7.13237  | CHD4_ENSG00000111642                                          |
| 12 | 6717852 | 6718188 | KD2-H4K8la_peak_1371 | 6.88801  |                                                               |
| 12 | 6721854 | 6722053 | KD2-H4K8la_peak_1372 | 11.60966 |                                                               |
| 12 | 6722469 | 6722778 | KD2-H4K8la_peak_1373 | 18.46931 |                                                               |
| 12 | 6723445 | 6723851 | KD2-H4K8la_peak_1374 | 6.86458  |                                                               |
| 12 | 6797750 | 6798001 | KD2-H4K8la_peak_1375 | 5.7631   | ZNF384_ENSG00000126746                                        |
| 12 | 6798255 | 6798512 | KD2-H4K8la_peak_1376 | 19.30767 | ZNF384_ENSG00000126746                                        |
| 12 | 6809517 | 6809754 | KD2-H4K8la_peak_1377 | 10.11868 | PIANP_ENSG00000139200                                         |
| 12 | 6976769 | 6977105 | KD2-H4K8la_peak_1378 | 13.91009 | TPI1_ENSG00000111669                                          |

|    |         |         |                      |          |                                                       |
|----|---------|---------|----------------------|----------|-------------------------------------------------------|
| 12 | 7023066 | 7023970 | KD2-H4K8la_peak_1379 | 12.1221  | ENO2_ENSG00000111674                                  |
| 12 | 7046363 | 7047122 | KD2-H4K8la_peak_1380 | 8.93385  |                                                       |
| 12 | 7053361 | 7053644 | KD2-H4K8la_peak_1381 | 7.12014  | U47924.31_ENSG00000272173;RNU7-1_ENSG00000238923      |
| 12 | 7079345 | 7079799 | KD2-H4K8la_peak_1382 | 13.47548 | PHB2_ENSG00000215021                                  |
| 12 | 7261050 | 7261425 | KD2-H4K8la_peak_1383 | 4.86896  | C1RL_ENSG00000139178;C1RL-AS1_ENSG00000205885         |
| 12 | 1.3E+07 | 1.3E+07 | KD2-H4K8la_peak_1384 | 9.0413   |                                                       |
| 12 | 1.3E+07 | 1.3E+07 | KD2-H4K8la_peak_1385 | 11.60966 |                                                       |
| 12 | 1.3E+07 | 1.3E+07 | KD2-H4K8la_peak_1386 | 8.77936  |                                                       |
| 12 | 1.6E+07 | 1.6E+07 | KD2-H4K8la_peak_1387 | 8.59561  |                                                       |
| 12 | 2E+07   | 2E+07   | KD2-H4K8la_peak_1388 | 5.58883  |                                                       |
| 12 | 2E+07   | 2E+07   | KD2-H4K8la_peak_1389 | 6.22999  |                                                       |
| 12 | 2.1E+07 | 2.1E+07 | KD2-H4K8la_peak_1390 | 5.58883  | RP11-284H19.1_ENSG00000256879;PDE3A_ENSG00000172572   |
| 12 | 2.2E+07 | 2.2E+07 | KD2-H4K8la_peak_1391 | 14.15376 | CMAS_ENSG00000111726                                  |
| 12 | 2.3E+07 | 2.3E+07 | KD2-H4K8la_peak_1392 | 6.26214  |                                                       |
| 12 | 2.5E+07 | 2.5E+07 | KD2-H4K8la_peak_1393 | 6.2278   | RP11-444D3.1_ENSG00000255864                          |
| 12 | 2.6E+07 | 2.6E+07 | KD2-H4K8la_peak_1394 | 8.77936  | RASSF8_ENSG00000123094                                |
| 12 | 2.8E+07 | 2.8E+07 | KD2-H4K8la_peak_1395 | 10.03312 | RP11-1060J15.4_ENSG00000256377;MRPS35_ENSG00000061794 |
| 12 | 2.9E+07 | 2.9E+07 | KD2-H4K8la_peak_1396 | 11.06859 | RP11-946L16.1_ENSG00000257258;FAR2_ENSG00000064763    |
| 12 | 3.1E+07 | 3.1E+07 | KD2-H4K8la_peak_1397 | 4.30663  |                                                       |
| 12 | 3.1E+07 | 3.1E+07 | KD2-H4K8la_peak_1398 | 8.39919  | TSPAN11_ENSG00000110900                               |
| 12 | 3.2E+07 | 3.2E+07 | KD2-H4K8la_peak_1399 | 4.79631  |                                                       |
| 12 | 3.2E+07 | 3.2E+07 | KD2-H4K8la_peak_1400 | 21.33961 | RP11-843B15.2_ENSG00000257530;BICD1_ENSG00000151746   |
| 12 | 3.3E+07 | 3.3E+07 | KD2-H4K8la_peak_1401 | 5.05146  |                                                       |
| 12 | 3.4E+07 | 3.4E+07 | KD2-H4K8la_peak_1402 | 6.57319  |                                                       |
| 12 | 3.9E+07 | 3.9E+07 | KD2-H4K8la_peak_1403 | 8.86558  | ALG10B_ENSG00000175548                                |
| 12 | 4.2E+07 | 4.2E+07 | KD2-H4K8la_peak_1404 | 7.81267  | RP11-630C16.2_ENSG00000257239                         |
| 12 | 4.4E+07 | 4.4E+07 | KD2-H4K8la_peak_1405 | 4.53273  | TWF1_ENSG00000151239                                  |
| 12 | 4.6E+07 | 4.6E+07 | KD2-H4K8la_peak_1406 | 6.36118  | PLEKHA8P1_ENSG00000134297;ANO6_ENSG00000177119        |
| 12 | 4.6E+07 | 4.6E+07 | KD2-H4K8la_peak_1407 | 6.64804  | ARID2_ENSG00000189079                                 |
| 12 | 4.7E+07 | 4.7E+07 | KD2-H4K8la_peak_1408 | 6.48366  | SLC38A2_ENSG00000134294;RP11-474P2.2_ENSG00000258096  |
| 12 | 4.8E+07 | 4.8E+07 | KD2-H4K8la_peak_1409 | 6.86458  |                                                       |
| 12 | 4.8E+07 | 4.8E+07 | KD2-H4K8la_peak_1410 | 4.44972  |                                                       |
| 12 | 4.8E+07 | 4.8E+07 | KD2-H4K8la_peak_1411 | 8.37064  |                                                       |
| 12 | 4.9E+07 | 4.9E+07 | KD2-H4K8la_peak_1412 | 6.57319  | SENP1_ENSG00000079387                                 |
| 12 | 4.9E+07 | 4.9E+07 | KD2-H4K8la_peak_1413 | 9.90319  | CCNT1_ENSG00000129315                                 |
| 12 | 4.9E+07 | 4.9E+07 | KD2-H4K8la_peak_1414 | 8.72694  | ADCY6_ENSG00000174233;RP11-579D7.4_ENSG00000257660    |
| 12 | 4.9E+07 | 4.9E+07 | KD2-H4K8la_peak_1415 | 8.944    |                                                       |
| 12 | 4.9E+07 | 4.9E+07 | KD2-H4K8la_peak_1416 | 8.59735  | DDN_ENSG00000181418;RP11-386G11.5_ENSG00000257913     |
| 12 | 4.9E+07 | 4.9E+07 | KD2-H4K8la_peak_1417 | 10.97039 | PRKAG1_ENSG00000181929                                |
| 12 | 5E+07   | 5E+07   | KD2-H4K8la_peak_1418 | 13.47548 | TUBA1B_ENSG00000123416                                |
| 12 | 5E+07   | 5E+07   | KD2-H4K8la_peak_1419 | 5.84082  | TUBA1A_ENSG00000167552;TUBA1C_ENSG00000167553         |
| 12 | 5E+07   | 5E+07   | KD2-H4K8la_peak_1420 | 11.06333 | PRPH_ENSG00000135406                                  |
| 12 | 5E+07   | 5E+07   | KD2-H4K8la_peak_1421 | 6.60352  | TROAP_ENSG00000135451                                 |
| 12 | 5E+07   | 5E+07   | KD2-H4K8la_peak_1422 | 5.05146  | MCRS1_ENSG00000187778;PRPF40B_ENSG00000110844         |
| 12 | 5E+07   | 5E+07   | KD2-H4K8la_peak_1423 | 8.12466  |                                                       |
| 12 | 5E+07   | 5E+07   | KD2-H4K8la_peak_1424 | 6.42514  |                                                       |

|    |         |         |                      |          |                                                  |
|----|---------|---------|----------------------|----------|--------------------------------------------------|
| 12 | 5E+07   | 5E+07   | KD2-H4K8la_peak_1425 | 6.64804  |                                                  |
| 12 | 5E+07   | 5E+07   | KD2-H4K8la_peak_1426 | 13.95533 |                                                  |
| 12 | 5.1E+07 | 5.1E+07 | KD2-H4K8la_peak_1427 | 7.12014  | ATF1_ENSG00000123268                             |
| 12 | 5.2E+07 | 5.2E+07 | KD2-H4K8la_peak_1428 | 6.77116  | POU6F1_ENSG00000184271                           |
| 12 | 5.2E+07 | 5.2E+07 | KD2-H4K8la_peak_1429 | 4.30663  |                                                  |
| 12 | 5.2E+07 | 5.2E+07 | KD2-H4K8la_peak_1430 | 5.58883  | SMAGP_ENSG00000170545                            |
| 12 | 5.2E+07 | 5.2E+07 | KD2-H4K8la_peak_1431 | 6.04152  | GALNT6_ENSG00000139629;SLC4A8_ENSG00000050438    |
| 12 | 5.2E+07 | 5.2E+07 | KD2-H4K8la_peak_1432 | 15.92725 | RP11-923I11.7_ENSG00000261308                    |
| 12 | 5.2E+07 | 5.2E+07 | KD2-H4K8la_peak_1433 | 11.40266 |                                                  |
| 12 | 5.2E+07 | 5.2E+07 | KD2-H4K8la_peak_1434 | 11.06859 |                                                  |
| 12 | 5.2E+07 | 5.2E+07 | KD2-H4K8la_peak_1435 | 9.73848  | ACVR1B_ENSG00000135503                           |
| 12 | 5.2E+07 | 5.2E+07 | KD2-H4K8la_peak_1436 | 8.8293   |                                                  |
| 12 | 5.3E+07 | 5.3E+07 | KD2-H4K8la_peak_1437 | 6.12473  |                                                  |
| 12 | 5.3E+07 | 5.3E+07 | KD2-H4K8la_peak_1438 | 7.92067  |                                                  |
| 12 | 5.3E+07 | 5.3E+07 | KD2-H4K8la_peak_1439 | 5.05146  | EIF4B_ENSG00000063046                            |
| 12 | 5.3E+07 | 5.3E+07 | KD2-H4K8la_peak_1440 | 5.43278  | TENC1_ENSG00000111077                            |
| 12 | 5.3E+07 | 5.3E+07 | KD2-H4K8la_peak_1441 | 9.05604  |                                                  |
| 12 | 5.3E+07 | 5.3E+07 | KD2-H4K8la_peak_1442 | 8.12047  |                                                  |
| 12 | 5.4E+07 | 5.4E+07 | KD2-H4K8la_peak_1443 | 9.88732  | RARG_ENSG00000172819                             |
| 12 | 5.4E+07 | 5.4E+07 | KD2-H4K8la_peak_1444 | 7.81267  | RARG_ENSG00000172819                             |
| 12 | 5.4E+07 | 5.4E+07 | KD2-H4K8la_peak_1445 | 5.98775  |                                                  |
| 12 | 5.4E+07 | 5.4E+07 | KD2-H4K8la_peak_1446 | 5.78738  | AAAS_ENSG00000094914                             |
| 12 | 5.4E+07 | 5.4E+07 | KD2-H4K8la_peak_1447 | 12.43981 | AAAS_ENSG00000094914                             |
| 12 | 5.4E+07 | 5.4E+07 | KD2-H4K8la_peak_1448 | 6.42514  |                                                  |
| 12 | 5.4E+07 | 5.4E+07 | KD2-H4K8la_peak_1449 | 4.53273  |                                                  |
| 12 | 5.4E+07 | 5.4E+07 | KD2-H4K8la_peak_1450 | 14.76753 | ATP5G2_ENSG00000135390                           |
| 12 | 5.4E+07 | 5.4E+07 | KD2-H4K8la_peak_1451 | 5.90392  |                                                  |
| 12 | 5.4E+07 | 5.4E+07 | KD2-H4K8la_peak_1452 | 4.69635  | AC012531.25_ENSG00000260597                      |
| 12 | 5.4E+07 | 5.4E+07 | KD2-H4K8la_peak_1453 | 6.2278   | AC012531.25_ENSG00000260597                      |
| 12 | 5.4E+07 | 5.4E+07 | KD2-H4K8la_peak_1454 | 4.53273  |                                                  |
| 12 | 5.4E+07 | 5.4E+07 | KD2-H4K8la_peak_1455 | 5.50657  | HOXC5_ENSG00000172789;MIR615_ENSG00000207571     |
| 12 | 5.4E+07 | 5.4E+07 | KD2-H4K8la_peak_1456 | 5.6499   | HOXC4_ENSG00000273266                            |
| 12 | 5.4E+07 | 5.4E+07 | KD2-H4K8la_peak_1457 | 7.13237  |                                                  |
| 12 | 5.6E+07 | 5.6E+07 | KD2-H4K8la_peak_1458 | 8.44557  | DNAJC14_ENSG00000135392;TMEM198B_ENSG00000182796 |
| 12 | 5.6E+07 | 5.6E+07 | KD2-H4K8la_peak_1459 | 7.81267  |                                                  |
| 12 | 5.6E+07 | 5.6E+07 | KD2-H4K8la_peak_1460 | 8.07102  |                                                  |
| 12 | 5.7E+07 | 5.7E+07 | KD2-H4K8la_peak_1461 | 4.90979  | RNF41_ENSG00000181852;NABP2_ENSG00000139579      |
| 12 | 5.7E+07 | 5.7E+07 | KD2-H4K8la_peak_1462 | 5.5899   | RNF41_ENSG00000181852;NABP2_ENSG00000139579      |
| 12 | 5.7E+07 | 5.7E+07 | KD2-H4K8la_peak_1463 | 4.7496   | PAN2_ENSG00000135473                             |
| 12 | 5.7E+07 | 5.7E+07 | KD2-H4K8la_peak_1464 | 10.27876 |                                                  |
| 12 | 5.7E+07 | 5.7E+07 | KD2-H4K8la_peak_1465 | 9.27765  | PRIM1_ENSG00000198056;HSD17B6_ENSG00000025423    |
| 12 | 5.7E+07 | 5.7E+07 | KD2-H4K8la_peak_1466 | 8.12466  | TMEM194A_ENSG00000166881;NAB2_ENSG00000166886    |
| 12 | 5.8E+07 | 5.8E+07 | KD2-H4K8la_peak_1467 | 5.43278  |                                                  |
| 12 | 5.8E+07 | 5.8E+07 | KD2-H4K8la_peak_1468 | 10.46101 |                                                  |
| 12 | 5.8E+07 | 5.8E+07 | KD2-H4K8la_peak_1469 | 8.62669  |                                                  |
| 12 | 5.8E+07 | 5.8E+07 | KD2-H4K8la_peak_1470 | 7.49467  | KIF5A_ENSG00000155980                            |



|    |         |         |                      |          |                                                                               |
|----|---------|---------|----------------------|----------|-------------------------------------------------------------------------------|
| 12 | 5.8E+07 | 5.8E+07 | KD2-H4K8la_peak_1471 | 9.6708   | DTX3_ENSG00000178498                                                          |
| 12 | 5.8E+07 | 5.8E+07 | KD2-H4K8la_peak_1472 | 17.60548 | ARHGEF25_ENSG00000240771                                                      |
| 12 | 5.8E+07 | 5.8E+07 | KD2-H4K8la_peak_1473 | 4.75945  |                                                                               |
| 12 | 5.8E+07 | 5.8E+07 | KD2-H4K8la_peak_1474 | 4.57647  |                                                                               |
| 12 | 5.8E+07 | 5.8E+07 | KD2-H4K8la_peak_1475 | 4.86896  |                                                                               |
| 12 | 5.8E+07 | 5.8E+07 | KD2-H4K8la_peak_1476 | 12.12477 | RP11-620J15.2_ENSG00000245651                                                 |
| 12 | 6.4E+07 | 6.4E+07 | KD2-H4K8la_peak_1477 | 9.61894  | DPY19L2_ENSG00000177990                                                       |
| 12 | 6.4E+07 | 6.4E+07 | KD2-H4K8la_peak_1478 | 4.53273  |                                                                               |
| 12 | 6.4E+07 | 6.4E+07 | KD2-H4K8la_peak_1479 | 9.73848  |                                                                               |
| 12 | 6.8E+07 | 6.8E+07 | KD2-H4K8la_peak_1480 | 6.11881  | CAND1_ENSG00000111530                                                         |
| 12 | 6.9E+07 | 6.9E+07 | KD2-H4K8la_peak_1481 | 5.83285  |                                                                               |
| 12 | 6.9E+07 | 6.9E+07 | KD2-H4K8la_peak_1482 | 7.13528  | MDM2_ENSG00000135679                                                          |
| 12 | 7.1E+07 | 7.1E+07 | KD2-H4K8la_peak_1483 | 9.05604  | RP11-611E13.2_ENSG00000257815;CNOT2_ENSG00000111596                           |
| 12 | 7.2E+07 | 7.2E+07 | KD2-H4K8la_peak_1484 | 5.7631   |                                                                               |
| 12 | 7.7E+07 | 7.7E+07 | KD2-H4K8la_peak_1485 | 10.28981 | BBS10_ENSG00000179941                                                         |
| 12 | 8.6E+07 | 8.6E+07 | KD2-H4K8la_peak_1486 | 8.77936  | RP11-408B11.2_ENSG00000258815                                                 |
| 12 | 8.9E+07 | 8.9E+07 | KD2-H4K8la_peak_1487 | 6.13528  |                                                                               |
| 12 | 9E+07   | 9E+07   | KD2-H4K8la_peak_1488 | 4.36246  | DUSP6_ENSG00000139318                                                         |
| 12 | 9.2E+07 | 9.2E+07 | KD2-H4K8la_peak_1489 | 5.36015  |                                                                               |
| 12 | 9.3E+07 | 9.3E+07 | KD2-H4K8la_peak_1490 | 6.64804  |                                                                               |
| 12 | 9.4E+07 | 9.4E+07 | KD2-H4K8la_peak_1491 | 6.3399   | UBE2N_ENSG00000177889                                                         |
| 12 | 9.4E+07 | 9.4E+07 | KD2-H4K8la_peak_1492 | 8.37064  | SOCS2-AS1_ENSG00000246985                                                     |
| 12 | 9.4E+07 | 9.4E+07 | KD2-H4K8la_peak_1493 | 6.88801  | CRADD_ENSG00000169372                                                         |
| 12 | 9.4E+07 | 9.4E+07 | KD2-H4K8la_peak_1494 | 11.06859 |                                                                               |
| 12 | 9.5E+07 | 9.5E+07 | KD2-H4K8la_peak_1495 | 6.89612  |                                                                               |
| 12 | 9.5E+07 | 9.5E+07 | KD2-H4K8la_peak_1496 | 6.57319  | CCDC41_ENSG00000173588                                                        |
| 12 | 9.6E+07 | 9.6E+07 | KD2-H4K8la_peak_1497 | 7.22716  |                                                                               |
| 12 | 9.6E+07 | 9.6E+07 | KD2-H4K8la_peak_1498 | 13.04837 | CCDC38_ENSG00000165972;AMDHD1_ENSG00000139344                                 |
| 12 | 9.7E+07 | 9.7E+07 | KD2-H4K8la_peak_1499 | 7.13237  | NEDD1_ENSG00000139350                                                         |
| 12 | 1E+08   | 1E+08   | KD2-H4K8la_peak_1500 | 8.86558  | DRAM1_ENSG00000136048                                                         |
| 12 | 1E+08   | 1E+08   | KD2-H4K8la_peak_1501 | 5.83285  | RP11-642P15.1_ENSG00000214198;HSP90B1_ENSG00000166598;MIR3652_ENSG00000265072 |
| 12 | 1E+08   | 1E+08   | KD2-H4K8la_peak_1502 | 19.04072 | NFYB_ENSG00000120837                                                          |
| 12 | 1.1E+08 | 1.1E+08 | KD2-H4K8la_peak_1503 | 8.12466  | SLC41A2_ENSG00000136052                                                       |
| 12 | 1.1E+08 | 1.1E+08 | KD2-H4K8la_peak_1504 | 12.31762 | NUAK1_ENSG00000074590                                                         |
| 12 | 1.1E+08 | 1.1E+08 | KD2-H4K8la_peak_1505 | 5.33301  | SNORD74_ENSG00000200897                                                       |
| 12 | 1.1E+08 | 1.1E+08 | KD2-H4K8la_peak_1506 | 6.61963  |                                                                               |
| 12 | 1.1E+08 | 1.1E+08 | KD2-H4K8la_peak_1507 | 5.83285  |                                                                               |
| 12 | 1.1E+08 | 1.1E+08 | KD2-H4K8la_peak_1508 | 8.07102  |                                                                               |
| 12 | 1.1E+08 | 1.1E+08 | KD2-H4K8la_peak_1509 | 10.00612 | SSH1_ENSG00000084112;DAO_ENSG00000110887                                      |
| 12 | 1.1E+08 | 1.1E+08 | KD2-H4K8la_peak_1510 | 6.13528  |                                                                               |
| 12 | 1.1E+08 | 1.1E+08 | KD2-H4K8la_peak_1511 | 10.45647 |                                                                               |
| 12 | 1.1E+08 | 1.1E+08 | KD2-H4K8la_peak_1512 | 10.00175 | FOXN4_ENSG00000139445                                                         |
| 12 | 1.1E+08 | 1.1E+08 | KD2-H4K8la_peak_1513 | 5.05146  |                                                                               |
| 12 | 1.1E+08 | 1.1E+08 | KD2-H4K8la_peak_1514 | 7.12497  |                                                                               |
| 12 | 1.1E+08 | 1.1E+08 | KD2-H4K8la_peak_1515 | 4.66473  |                                                                               |
| 12 | 1.1E+08 | 1.1E+08 | KD2-H4K8la_peak_1516 | 6.2278   |                                                                               |

|    |         |         |                      |          |                                                                                  |
|----|---------|---------|----------------------|----------|----------------------------------------------------------------------------------|
| 12 | 1.1E+08 | 1.1E+08 | KD2-H4K8la_peak_1517 | 8.43222  |                                                                                  |
| 12 | 1.1E+08 | 1.1E+08 | KD2-H4K8la_peak_1518 | 7.49467  |                                                                                  |
| 12 | 1.1E+08 | 1.1E+08 | KD2-H4K8la_peak_1519 | 9.73848  | TRPV4_ENSG00000111199;MIR4497_ENSG00000263510                                    |
| 12 | 1.1E+08 | 1.1E+08 | KD2-H4K8la_peak_1520 | 5.36015  | GIT2_ENSG00000139436                                                             |
| 12 | 1.1E+08 | 1.1E+08 | KD2-H4K8la_peak_1521 | 7.16004  | GIT2_ENSG00000139436                                                             |
| 12 | 1.1E+08 | 1.1E+08 | KD2-H4K8la_peak_1522 | 6.89612  | C12orf76_ENSG00000174456                                                         |
| 12 | 1.1E+08 | 1.1E+08 | KD2-H4K8la_peak_1523 | 5.58883  |                                                                                  |
| 12 | 1.1E+08 | 1.1E+08 | KD2-H4K8la_peak_1524 | 10.11868 |                                                                                  |
| 12 | 1.1E+08 | 1.1E+08 | KD2-H4K8la_peak_1525 | 13.85872 |                                                                                  |
| 12 | 1.1E+08 | 1.1E+08 | KD2-H4K8la_peak_1526 | 8.7731   |                                                                                  |
| 12 | 1.1E+08 | 1.1E+08 | KD2-H4K8la_peak_1527 | 5.58883  |                                                                                  |
| 12 | 1.1E+08 | 1.1E+08 | KD2-H4K8la_peak_1528 | 4.94337  |                                                                                  |
| 12 | 1.1E+08 | 1.1E+08 | KD2-H4K8la_peak_1529 | 7.68279  |                                                                                  |
| 12 | 1.1E+08 | 1.1E+08 | KD2-H4K8la_peak_1530 | 11.77509 | MAPKAPK5-AS1_ENSG00000234608;AC003029.1_ENSG00000248594;MAPKAPK5_ENSG00000089022 |
| 12 | 1.1E+08 | 1.1E+08 | KD2-H4K8la_peak_1531 | 6.57319  | NAA25_ENSG00000111300                                                            |
| 12 | 1.1E+08 | 1.1E+08 | KD2-H4K8la_peak_1532 | 6.2278   | NAA25_ENSG00000111300                                                            |
| 12 | 1.1E+08 | 1.1E+08 | KD2-H4K8la_peak_1533 | 6.2278   |                                                                                  |
| 12 | 1.1E+08 | 1.1E+08 | KD2-H4K8la_peak_1534 | 5.43278  |                                                                                  |
| 12 | 1.1E+08 | 1.1E+08 | KD2-H4K8la_peak_1535 | 7.96951  |                                                                                  |
| 12 | 1.1E+08 | 1.1E+08 | KD2-H4K8la_peak_1536 | 8.07102  |                                                                                  |
| 12 | 1.2E+08 | 1.2E+08 | KD2-H4K8la_peak_1537 | 4.80784  |                                                                                  |
| 12 | 1.2E+08 | 1.2E+08 | KD2-H4K8la_peak_1538 | 7.60756  |                                                                                  |
| 12 | 1.2E+08 | 1.2E+08 | KD2-H4K8la_peak_1539 | 5.72892  |                                                                                  |
| 12 | 1.2E+08 | 1.2E+08 | KD2-H4K8la_peak_1540 | 7.04184  |                                                                                  |
| 12 | 1.2E+08 | 1.2E+08 | KD2-H4K8la_peak_1541 | 9.49266  | TESC_ENSG00000088992;RP11-103B5.2_ENSG00000258285                                |
| 12 | 1.2E+08 | 1.2E+08 | KD2-H4K8la_peak_1542 | 6.86458  |                                                                                  |
| 12 | 1.2E+08 | 1.2E+08 | KD2-H4K8la_peak_1543 | 6.28277  | VSIG10_ENSG00000176834;PEBP1_ENSG00000089220                                     |
| 12 | 1.2E+08 | 1.2E+08 | KD2-H4K8la_peak_1544 | 4.30663  | RP11-131L12.2_ENSG00000270482;SUDS3_ENSG00000111707                              |
| 12 | 1.2E+08 | 1.2E+08 | KD2-H4K8la_peak_1545 | 8.39919  | RP11-768F21.1_ENSG00000248636;PRKAB1_ENSG00000111725                             |
| 12 | 1.2E+08 | 1.2E+08 | KD2-H4K8la_peak_1546 | 7.19298  |                                                                                  |
| 12 | 1.2E+08 | 1.2E+08 | KD2-H4K8la_peak_1547 | 10.00612 | GCN1L1_ENSG00000089154                                                           |
| 12 | 1.2E+08 | 1.2E+08 | KD2-H4K8la_peak_1548 | 7.72421  |                                                                                  |
| 12 | 1.2E+08 | 1.2E+08 | KD2-H4K8la_peak_1549 | 9.55813  |                                                                                  |
| 12 | 1.2E+08 | 1.2E+08 | KD2-H4K8la_peak_1550 | 5.89088  | MSI1_ENSG00000135097;RPS27P25_ENSG00000239881                                    |
| 12 | 1.2E+08 | 1.2E+08 | KD2-H4K8la_peak_1551 | 7.3993   | MSI1_ENSG00000135097;RPS27P25_ENSG00000239881                                    |
| 12 | 1.2E+08 | 1.2E+08 | KD2-H4K8la_peak_1552 | 9.35473  | TRIAP1_ENSG00000170855;GATC_ENSG00000257218                                      |
| 12 | 1.2E+08 | 1.2E+08 | KD2-H4K8la_peak_1553 | 7.61975  | SRSF9_ENSG00000111786;DYNLL1_ENSG00000088986                                     |
| 12 | 1.2E+08 | 1.2E+08 | KD2-H4K8la_peak_1554 | 11.5908  | COQ5_ENSG00000110871;RNF10_ENSG00000022840                                       |
| 12 | 1.2E+08 | 1.2E+08 | KD2-H4K8la_peak_1555 | 7.13237  | P2RX4_ENSG00000135124                                                            |
| 12 | 1.2E+08 | 1.2E+08 | KD2-H4K8la_peak_1556 | 6.51326  |                                                                                  |
| 12 | 1.2E+08 | 1.2E+08 | KD2-H4K8la_peak_1557 | 8.89875  | MORN3_ENSG00000139714                                                            |
| 12 | 1.2E+08 | 1.2E+08 | KD2-H4K8la_peak_1558 | 12.97817 |                                                                                  |
| 12 | 1.2E+08 | 1.2E+08 | KD2-H4K8la_peak_1559 | 7.90495  | SETD1B_ENSG00000139718;RHOF_ENSG00000139725;AC084018.1_ENSG00000212694           |
| 12 | 1.2E+08 | 1.2E+08 | KD2-H4K8la_peak_1560 | 7.06427  | SETD1B_ENSG00000139718;RHOF_ENSG00000139725;AC084018.1_ENSG00000212694           |
| 12 | 1.2E+08 | 1.2E+08 | KD2-H4K8la_peak_1561 | 12.1221  |                                                                                  |
| 12 | 1.2E+08 | 1.2E+08 | KD2-H4K8la_peak_1562 | 10.20357 | OGFOD2_ENSG00000111325;RP11-197N18.2_ENSG00000256028                             |

|    |         |         |                      |          |                                                                         |
|----|---------|---------|----------------------|----------|-------------------------------------------------------------------------|
| 12 | 1.2E+08 | 1.2E+08 | KD2-H4K8la_peak_1563 | 7.30722  | ARL6IP4_ENSG00000182196                                                 |
| 12 | 1.2E+08 | 1.2E+08 | KD2-H4K8la_peak_1564 | 6.68593  |                                                                         |
| 12 | 1.2E+08 | 1.2E+08 | KD2-H4K8la_peak_1565 | 6.47589  |                                                                         |
| 12 | 1.2E+08 | 1.2E+08 | KD2-H4K8la_peak_1566 | 8.39919  | CDK2AP1_ENSG00000111328                                                 |
| 12 | 1.2E+08 | 1.2E+08 | KD2-H4K8la_peak_1567 | 9.27415  |                                                                         |
| 12 | 1.2E+08 | 1.2E+08 | KD2-H4K8la_peak_1568 | 7.81267  | RILPL1_ENSG00000188026                                                  |
| 12 | 1.2E+08 | 1.2E+08 | KD2-H4K8la_peak_1569 | 9.35473  | DDX55_ENSG00000111364                                                   |
| 12 | 1.2E+08 | 1.2E+08 | KD2-H4K8la_peak_1570 | 7.30722  | CCDC92_ENSG00000119242;FAM101A_ENSG00000178882                          |
| 12 | 1.2E+08 | 1.2E+08 | KD2-H4K8la_peak_1571 | 5.33721  |                                                                         |
| 12 | 1.2E+08 | 1.2E+08 | KD2-H4K8la_peak_1572 | 6.97066  |                                                                         |
| 12 | 1.2E+08 | 1.2E+08 | KD2-H4K8la_peak_1573 | 12.55003 |                                                                         |
| 12 | 1.3E+08 | 1.3E+08 | KD2-H4K8la_peak_1574 | 15.82244 | NCOR2_ENSG00000196498                                                   |
| 12 | 1.3E+08 | 1.3E+08 | KD2-H4K8la_peak_1575 | 7.07162  |                                                                         |
| 12 | 1.3E+08 | 1.3E+08 | KD2-H4K8la_peak_1576 | 7.92775  |                                                                         |
| 12 | 1.3E+08 | 1.3E+08 | KD2-H4K8la_peak_1577 | 11.17433 |                                                                         |
| 12 | 1.3E+08 | 1.3E+08 | KD2-H4K8la_peak_1578 | 7.49467  |                                                                         |
| 12 | 1.3E+08 | 1.3E+08 | KD2-H4K8la_peak_1579 | 6.11881  | SLC15A4_ENSG00000139370                                                 |
| 12 | 1.3E+08 | 1.3E+08 | KD2-H4K8la_peak_1580 | 10.03312 |                                                                         |
| 12 | 1.3E+08 | 1.3E+08 | KD2-H4K8la_peak_1581 | 6.3399   |                                                                         |
| 12 | 1.3E+08 | 1.3E+08 | KD2-H4K8la_peak_1582 | 9.70343  |                                                                         |
| 12 | 1.3E+08 | 1.3E+08 | KD2-H4K8la_peak_1583 | 9.9701   |                                                                         |
| 12 | 1.3E+08 | 1.3E+08 | KD2-H4K8la_peak_1584 | 9.81837  |                                                                         |
| 12 | 1.3E+08 | 1.3E+08 | KD2-H4K8la_peak_1585 | 5.27164  | RAN_ENSG00000132341                                                     |
| 12 | 1.3E+08 | 1.3E+08 | KD2-H4K8la_peak_1586 | 7.12014  | RP13-507P19.1_ENSG00000256484                                           |
| 12 | 1.3E+08 | 1.3E+08 | KD2-H4K8la_peak_1587 | 13.2369  | SFSWAP_ENSG00000061936                                                  |
| 12 | 1.3E+08 | 1.3E+08 | KD2-H4K8la_peak_1588 | 10.8046  |                                                                         |
| 12 | 1.3E+08 | 1.3E+08 | KD2-H4K8la_peak_1589 | 6.57426  |                                                                         |
| 12 | 1.3E+08 | 1.3E+08 | KD2-H4K8la_peak_1590 | 10.20357 |                                                                         |
| 12 | 1.3E+08 | 1.3E+08 | KD2-H4K8la_peak_1591 | 6.2278   | POLE_ENSG00000177084;PXMP2_ENSG00000176894;RP13-672B3.2_ENSG00000256632 |
| 12 | 1.3E+08 | 1.3E+08 | KD2-H4K8la_peak_1592 | 6.42514  | PGAM5_ENSG00000247077                                                   |
| 12 | 1.3E+08 | 1.3E+08 | KD2-H4K8la_peak_1593 | 8.24908  | RP11-46H11.12_ENSG00000236617                                           |
| 13 | 2.1E+07 | 2.1E+07 | KD2-H4K8la_peak_1594 | 10.49982 | ZMYM2_ENSG00000121741                                                   |
| 13 | 2.1E+07 | 2.1E+07 | KD2-H4K8la_peak_1595 | 7.61975  | XPO4_ENSG00000132953                                                    |
| 13 | 2.2E+07 | 2.2E+07 | KD2-H4K8la_peak_1596 | 6.70626  | MIPEPP3_ENSG00000233325                                                 |
| 13 | 2.2E+07 | 2.2E+07 | KD2-H4K8la_peak_1597 | 8.4393   | ZDHHC20_ENSG00000180776                                                 |
| 13 | 2.6E+07 | 2.6E+07 | KD2-H4K8la_peak_1598 | 8.13557  | RP11-271M24.2_ENSG00000260509;NUPL1_ENSG00000139496                     |
| 13 | 2.8E+07 | 2.8E+07 | KD2-H4K8la_peak_1599 | 15.01131 | MTIF3_ENSG00000122033                                                   |
| 13 | 3E+07   | 3E+07   | KD2-H4K8la_peak_1600 | 8.44557  | SLC7A1_ENSG00000139514                                                  |
| 13 | 3.1E+07 | 3.1E+07 | KD2-H4K8la_peak_1601 | 7.13237  | KATNAL1_ENSG00000102781                                                 |
| 13 | 3.1E+07 | 3.1E+07 | KD2-H4K8la_peak_1602 | 5.48079  |                                                                         |
| 13 | 3.1E+07 | 3.1E+07 | KD2-H4K8la_peak_1603 | 9.0413   |                                                                         |
| 13 | 3.2E+07 | 3.2E+07 | KD2-H4K8la_peak_1604 | 7.23116  |                                                                         |
| 13 | 3.3E+07 | 3.3E+07 | KD2-H4K8la_peak_1605 | 5.60379  |                                                                         |
| 13 | 3.4E+07 | 3.4E+07 | KD2-H4K8la_peak_1606 | 9.0413   | KL_ENSG00000133116                                                      |
| 13 | 3.6E+07 | 3.6E+07 | KD2-H4K8la_peak_1607 | 13.91009 |                                                                         |
| 13 | 3.7E+07 | 3.7E+07 | KD2-H4K8la_peak_1608 | 5.58883  | SPG20OS_ENSG00000120664                                                 |

|    |         |         |                      |          |                                                       |
|----|---------|---------|----------------------|----------|-------------------------------------------------------|
| 13 | 3.7E+07 | 3.7E+07 | KD2-H4K8la_peak_1609 | 5.14476  | SMAD9_ENSG00000120693                                 |
| 13 | 4.1E+07 | 4.1E+07 | KD2-H4K8la_peak_1610 | 6.70626  | MRPS31_ENSG00000102738                                |
| 13 | 4.2E+07 | 4.2E+07 | KD2-H4K8la_peak_1611 | 9.0516   | KBTBD7_ENSG00000120696                                |
| 13 | 4.3E+07 | 4.3E+07 | KD2-H4K8la_peak_1612 | 7.23116  | VWA8_ENSG00000102763                                  |
| 13 | 4.4E+07 | 4.4E+07 | KD2-H4K8la_peak_1613 | 6.70626  |                                                       |
| 13 | 4.4E+07 | 4.4E+07 | KD2-H4K8la_peak_1614 | 7.12014  | CCDC122_ENSG00000151773;LACC1_ENSG00000179630         |
| 13 | 4.5E+07 | 4.5E+07 | KD2-H4K8la_peak_1615 | 10.20357 | SERP2_ENSG00000151778                                 |
| 13 | 4.5E+07 | 4.5E+07 | KD2-H4K8la_peak_1616 | 5.66717  |                                                       |
| 13 | 4.9E+07 | 4.9E+07 | KD2-H4K8la_peak_1617 | 6.61963  | SUCLA2-AS1_ENSG00000227848                            |
| 13 | 4.9E+07 | 4.9E+07 | KD2-H4K8la_peak_1618 | 7.72421  | MED4_ENSG00000136146                                  |
| 13 | 4.9E+07 | 4.9E+07 | KD2-H4K8la_peak_1619 | 5.43278  | RCBTB2_ENSG00000136161                                |
| 13 | 5E+07   | 5E+07   | KD2-H4K8la_peak_1620 | 5.67596  | FNDC3A_ENSG00000102531                                |
| 13 | 5.1E+07 | 5.1E+07 | KD2-H4K8la_peak_1621 | 6.88507  | DLEU2_ENSG00000231607                                 |
| 13 | 5.1E+07 | 5.1E+07 | KD2-H4K8la_peak_1622 | 6.40658  | RNASEH2B-AS1_ENSG00000233672;RNASEH2B_ENSG00000136104 |
| 13 | 5.2E+07 | 5.2E+07 | KD2-H4K8la_peak_1623 | 6.64804  | INTS6-AS1_ENSG00000236778                             |
| 13 | 5.2E+07 | 5.2E+07 | KD2-H4K8la_peak_1624 | 4.45136  |                                                       |
| 13 | 5.2E+07 | 5.2E+07 | KD2-H4K8la_peak_1625 | 7.81267  |                                                       |
| 13 | 5.2E+07 | 5.2E+07 | KD2-H4K8la_peak_1626 | 12.11081 |                                                       |
| 13 | 5.2E+07 | 5.2E+07 | KD2-H4K8la_peak_1627 | 7.34033  |                                                       |
| 13 | 5.3E+07 | 5.3E+07 | KD2-H4K8la_peak_1628 | 4.75945  | MRPS31P5_ENSG00000243406                              |
| 13 | 5.3E+07 | 5.3E+07 | KD2-H4K8la_peak_1629 | 13.13367 | VPS36_ENSG00000136100                                 |
| 13 | 7.2E+07 | 7.2E+07 | KD2-H4K8la_peak_1630 | 6.57426  | DACH1_ENSG00000165659                                 |
| 13 | 7.5E+07 | 7.5E+07 | KD2-H4K8la_peak_1631 | 8.37064  | KLF12_ENSG00000118922                                 |
| 13 | 7.6E+07 | 7.6E+07 | KD2-H4K8la_peak_1632 | 9.20163  | RP11-173B14.5_ENSG00000261105                         |
| 13 | 7.7E+07 | 7.7E+07 | KD2-H4K8la_peak_1633 | 6.28277  | KCTD12_ENSG00000178695;AC000403.1_ENSG00000264908     |
| 13 | 7.8E+07 | 7.8E+07 | KD2-H4K8la_peak_1634 | 10.98662 | CLN5_ENSG00000102805                                  |
| 13 | 7.8E+07 | 7.8E+07 | KD2-H4K8la_peak_1635 | 8.43222  |                                                       |
| 13 | 7.9E+07 | 7.9E+07 | KD2-H4K8la_peak_1636 | 7.23116  | RNF219_ENSG00000152193                                |
| 13 | 8.1E+07 | 8.1E+07 | KD2-H4K8la_peak_1637 | 5.36015  |                                                       |
| 13 | 8.1E+07 | 8.1E+07 | KD2-H4K8la_peak_1638 | 4.52633  |                                                       |
| 13 | 8.1E+07 | 8.1E+07 | KD2-H4K8la_peak_1639 | 6.64804  | SPRY2_ENSG00000136158                                 |
| 13 | 8.1E+07 | 8.1E+07 | KD2-H4K8la_peak_1640 | 11.15747 | SPRY2_ENSG00000136158                                 |
| 13 | 8.1E+07 | 8.1E+07 | KD2-H4K8la_peak_1641 | 5.16795  |                                                       |
| 13 | 8.6E+07 | 8.6E+07 | KD2-H4K8la_peak_1642 | 10.34978 |                                                       |
| 13 | 9.2E+07 | 9.2E+07 | KD2-H4K8la_peak_1643 | 12.14099 | MIR17HG_ENSG00000215417                               |
| 13 | 9.5E+07 | 9.5E+07 | KD2-H4K8la_peak_1644 | 9.27765  |                                                       |
| 13 | 9.5E+07 | 9.5E+07 | KD2-H4K8la_peak_1645 | 6.3399   | TGDS_ENSG00000088451                                  |
| 13 | 9.9E+07 | 9.9E+07 | KD2-H4K8la_peak_1646 | 4.72651  | STK24_ENSG00000102572;STK24-AS1_ENSG00000224418       |
| 13 | 9.9E+07 | 9.9E+07 | KD2-H4K8la_peak_1647 | 4.86896  |                                                       |
| 13 | 1E+08   | 1E+08   | KD2-H4K8la_peak_1648 | 8.73956  | UBAC2-AS1_ENSG00000228889;UBAC2_ENSG00000134882       |
| 13 | 1E+08   | 1E+08   | KD2-H4K8la_peak_1649 | 7.61975  | UBAC2-AS1_ENSG00000228889;UBAC2_ENSG00000134882       |
| 13 | 1E+08   | 1E+08   | KD2-H4K8la_peak_1650 | 8.13557  | GGACT_ENSG00000134864                                 |
| 13 | 1E+08   | 1E+08   | KD2-H4K8la_peak_1651 | 10.62798 | FGF14-IT1_ENSG00000243319;FGF14-AS2_ENSG00000272143   |
| 13 | 1E+08   | 1E+08   | KD2-H4K8la_peak_1652 | 9.86881  | ERCC5_ENSG00000134899                                 |
| 13 | 1.1E+08 | 1.1E+08 | KD2-H4K8la_peak_1653 | 5.72892  |                                                       |
| 13 | 1.1E+08 | 1.1E+08 | KD2-H4K8la_peak_1654 | 12.14099 |                                                       |

|    |         |         |                      |          |                                                  |
|----|---------|---------|----------------------|----------|--------------------------------------------------|
| 13 | 1.1E+08 | 1.1E+08 | KD2-H4K8la_peak_1655 | 7.65547  |                                                  |
| 13 | 1.1E+08 | 1.1E+08 | KD2-H4K8la_peak_1656 | 5.83285  |                                                  |
| 13 | 1.1E+08 | 1.1E+08 | KD2-H4K8la_peak_1657 | 6.70626  |                                                  |
| 13 | 1.1E+08 | 1.1E+08 | KD2-H4K8la_peak_1658 | 8.07102  |                                                  |
| 13 | 1.1E+08 | 1.1E+08 | KD2-H4K8la_peak_1659 | 8.73956  |                                                  |
| 13 | 1.1E+08 | 1.1E+08 | KD2-H4K8la_peak_1660 | 6.64804  |                                                  |
| 13 | 1.1E+08 | 1.1E+08 | KD2-H4K8la_peak_1661 | 8.6199   |                                                  |
| 13 | 1.1E+08 | 1.1E+08 | KD2-H4K8la_peak_1662 | 6.3399   | IRS2_ENSG00000185950                             |
| 13 | 1.1E+08 | 1.1E+08 | KD2-H4K8la_peak_1663 | 8.77936  |                                                  |
| 13 | 1.1E+08 | 1.1E+08 | KD2-H4K8la_peak_1664 | 10.03265 | COL4A1_ENSG00000187498;COL4A2_ENSG00000134871    |
| 13 | 1.1E+08 | 1.1E+08 | KD2-H4K8la_peak_1665 | 8.66164  | CARKD_ENSG00000213995                            |
| 13 | 1.1E+08 | 1.1E+08 | KD2-H4K8la_peak_1666 | 20.66643 | CARS2_ENSG00000134905;ING1_ENSG00000153487       |
| 13 | 1.1E+08 | 1.1E+08 | KD2-H4K8la_peak_1667 | 5.43278  | ANKRD10_ENSG00000088448                          |
| 13 | 1.1E+08 | 1.1E+08 | KD2-H4K8la_peak_1668 | 8.07102  |                                                  |
| 13 | 1.1E+08 | 1.1E+08 | KD2-H4K8la_peak_1669 | 6.61495  | TUBGCP3_ENSG00000126216                          |
| 13 | 1.1E+08 | 1.1E+08 | KD2-H4K8la_peak_1670 | 5.28047  | TUBGCP3_ENSG00000126216                          |
| 13 | 1.1E+08 | 1.1E+08 | KD2-H4K8la_peak_1671 | 9.27415  | MCF2L_ENSG00000126217                            |
| 13 | 1.1E+08 | 1.1E+08 | KD2-H4K8la_peak_1672 | 4.3268   |                                                  |
| 13 | 1.1E+08 | 1.1E+08 | KD2-H4K8la_peak_1673 | 16.7435  |                                                  |
| 13 | 1.1E+08 | 1.1E+08 | KD2-H4K8la_peak_1674 | 7.4908   |                                                  |
| 13 | 1.1E+08 | 1.1E+08 | KD2-H4K8la_peak_1675 | 10.28981 | PCID2_ENSG00000126226;CUL4A_ENSG00000139842      |
| 13 | 1.1E+08 | 1.1E+08 | KD2-H4K8la_peak_1676 | 12.85404 | LAMP1_ENSG00000185896                            |
| 13 | 1.1E+08 | 1.1E+08 | KD2-H4K8la_peak_1677 | 8.37064  | GRTP1_ENSG00000139835                            |
| 13 | 1.1E+08 | 1.1E+08 | KD2-H4K8la_peak_1678 | 6.64804  |                                                  |
| 13 | 1.1E+08 | 1.1E+08 | KD2-H4K8la_peak_1679 | 5.36015  |                                                  |
| 13 | 1.1E+08 | 1.1E+08 | KD2-H4K8la_peak_1680 | 9.05604  |                                                  |
| 13 | 1.1E+08 | 1.1E+08 | KD2-H4K8la_peak_1681 | 6.76424  |                                                  |
| 13 | 1.1E+08 | 1.1E+08 | KD2-H4K8la_peak_1682 | 7.33892  |                                                  |
| 13 | 1.1E+08 | 1.1E+08 | KD2-H4K8la_peak_1683 | 4.78385  |                                                  |
| 14 | 2E+07   | 2E+07   | KD2-H4K8la_peak_1684 | 4.44972  |                                                  |
| 14 | 2.1E+07 | 2.1E+07 | KD2-H4K8la_peak_1685 | 4.79631  | TMEM55B_ENSG00000165782                          |
| 14 | 2.1E+07 | 2.1E+07 | KD2-H4K8la_peak_1686 | 7.13237  |                                                  |
| 14 | 2.1E+07 | 2.1E+07 | KD2-H4K8la_peak_1687 | 10.04111 | TPPP2_ENSG00000179636;AL161668.5_ENSG00000258604 |
| 14 | 2.2E+07 | 2.2E+07 | KD2-H4K8la_peak_1688 | 4.30663  | ARHGEF40_ENSG00000165801                         |
| 14 | 2.2E+07 | 2.2E+07 | KD2-H4K8la_peak_1689 | 7.72421  |                                                  |
| 14 | 2.2E+07 | 2.2E+07 | KD2-H4K8la_peak_1690 | 8.07102  | HNRNPC_ENSG00000092199                           |
| 14 | 2.3E+07 | 2.3E+07 | KD2-H4K8la_peak_1691 | 5.30505  | MRPL52_ENSG00000172590;SLC7A7_ENSG00000155465    |
| 14 | 2.3E+07 | 2.3E+07 | KD2-H4K8la_peak_1692 | 7.11805  |                                                  |
| 14 | 2.3E+07 | 2.3E+07 | KD2-H4K8la_peak_1693 | 7.92775  | HAUS4_ENSG00000092036;MIR4707_ENSG00000265037    |
| 14 | 2.4E+07 | 2.4E+07 | KD2-H4K8la_peak_1694 | 7.61975  | PABPN1_ENSG00000100836                           |
| 14 | 2.4E+07 | 2.4E+07 | KD2-H4K8la_peak_1695 | 6.03112  | EFS_ENSG00000100842                              |
| 14 | 2.4E+07 | 2.4E+07 | KD2-H4K8la_peak_1696 | 5.67034  | RP11-66N24.4_ENSG00000157306                     |
| 14 | 2.4E+07 | 2.4E+07 | KD2-H4K8la_peak_1697 | 11.97807 |                                                  |
| 14 | 2.4E+07 | 2.4E+07 | KD2-H4K8la_peak_1698 | 13.3197  | DHRS4L2_ENSG00000187630                          |
| 14 | 2.4E+07 | 2.4E+07 | KD2-H4K8la_peak_1699 | 8.43222  |                                                  |
| 14 | 2.5E+07 | 2.5E+07 | KD2-H4K8la_peak_1700 | 8.16787  |                                                  |

|    |         |         |                      |          |                                                                       |
|----|---------|---------|----------------------|----------|-----------------------------------------------------------------------|
| 14 | 2.5E+07 | 2.5E+07 | KD2-H4K8la_peak_1701 | 10.62798 | TM9SF1_ENSG00000100926;TM9SF1_ENSG00000254692;CHMP4A_ENSG00000254505  |
| 14 | 2.5E+07 | 2.5E+07 | KD2-H4K8la_peak_1702 | 14.64566 |                                                                       |
| 14 | 2.5E+07 | 2.5E+07 | KD2-H4K8la_peak_1703 | 7.59044  |                                                                       |
| 14 | 3.1E+07 | 3.1E+07 | KD2-H4K8la_peak_1704 | 6.86458  | COCH_ENSG00000100473                                                  |
| 14 | 3.1E+07 | 3.1E+07 | KD2-H4K8la_peak_1705 | 10.99007 | STRN3_ENSG00000196792;AP4S1_ENSG00000100478                           |
| 14 | 3.2E+07 | 3.2E+07 | KD2-H4K8la_peak_1706 | 8.12466  | HECTD1_ENSG00000092148                                                |
| 14 | 3.5E+07 | 3.5E+07 | KD2-H4K8la_peak_1707 | 8.07102  |                                                                       |
| 14 | 3.5E+07 | 3.5E+07 | KD2-H4K8la_peak_1708 | 7.49467  | EAPP_ENSG00000129518                                                  |
| 14 | 3.6E+07 | 3.6E+07 | KD2-H4K8la_peak_1709 | 8.37064  | INSM2_ENSG00000168348                                                 |
| 14 | 5E+07   | 5E+07   | KD2-H4K8la_peak_1710 | 6.19992  | RPS29_ENSG00000213741;AL139099.1_ENSG00000253459;LRR1_ENSG00000165501 |
| 14 | 5E+07   | 5E+07   | KD2-H4K8la_peak_1711 | 6.64804  | KLHDC1_ENSG00000197776                                                |
| 14 | 5E+07   | 5E+07   | KD2-H4K8la_peak_1712 | 11.15182 | KLHDC2_ENSG00000165516                                                |
| 14 | 5E+07   | 5E+07   | KD2-H4K8la_peak_1713 | 4.75945  |                                                                       |
| 14 | 5.1E+07 | 5.1E+07 | KD2-H4K8la_peak_1714 | 7.13237  |                                                                       |
| 14 | 5.1E+07 | 5.1E+07 | KD2-H4K8la_peak_1715 | 5.83285  | RP11-247L20.3_ENSG00000258857                                         |
| 14 | 5.1E+07 | 5.1E+07 | KD2-H4K8la_peak_1716 | 9.38376  | MAP4K5_ENSG00000012983                                                |
| 14 | 5.1E+07 | 5.1E+07 | KD2-H4K8la_peak_1717 | 10.00612 | NIN_ENSG00000100503                                                   |
| 14 | 5.2E+07 | 5.2E+07 | KD2-H4K8la_peak_1718 | 4.30663  | C14orf166_ENSG00000087302                                             |
| 14 | 5.3E+07 | 5.3E+07 | KD2-H4K8la_peak_1719 | 7.72421  |                                                                       |
| 14 | 5.3E+07 | 5.3E+07 | KD2-H4K8la_peak_1720 | 8.12466  | PSMC6_ENSG00000100519                                                 |
| 14 | 5.5E+07 | 5.5E+07 | KD2-H4K8la_peak_1721 | 6.3399   | GMFB_ENSG00000197045                                                  |
| 14 | 5.5E+07 | 5.5E+07 | KD2-H4K8la_peak_1722 | 5.16597  |                                                                       |
| 14 | 5.5E+07 | 5.5E+07 | KD2-H4K8la_peak_1723 | 11.24937 |                                                                       |
| 14 | 5.5E+07 | 5.5E+07 | KD2-H4K8la_peak_1724 | 12.25633 |                                                                       |
| 14 | 5.5E+07 | 5.5E+07 | KD2-H4K8la_peak_1725 | 6.13507  | MIR4308_ENSG00000265432                                               |
| 14 | 5.6E+07 | 5.6E+07 | KD2-H4K8la_peak_1726 | 5.84082  |                                                                       |
| 14 | 5.6E+07 | 5.6E+07 | KD2-H4K8la_peak_1727 | 5.05146  | ATG14_ENSG00000126775                                                 |
| 14 | 5.8E+07 | 5.8E+07 | KD2-H4K8la_peak_1728 | 8.07102  | EXOC5_ENSG00000070367;AP5M1_ENSG00000053770                           |
| 14 | 5.9E+07 | 5.9E+07 | KD2-H4K8la_peak_1729 | 9.9701   | RP11-517O13.3_ENSG00000258658;TOMM20L_ENSG00000196860                 |
| 14 | 6.1E+07 | 6.1E+07 | KD2-H4K8la_peak_1730 | 7.72421  |                                                                       |
| 14 | 6.1E+07 | 6.1E+07 | KD2-H4K8la_peak_1731 | 9.72904  | SIX1_ENSG00000126778                                                  |
| 14 | 6.2E+07 | 6.2E+07 | KD2-H4K8la_peak_1732 | 4.86896  |                                                                       |
| 14 | 6.2E+07 | 6.2E+07 | KD2-H4K8la_peak_1733 | 5.43278  |                                                                       |
| 14 | 6.2E+07 | 6.2E+07 | KD2-H4K8la_peak_1734 | 8.07102  |                                                                       |
| 14 | 6.2E+07 | 6.2E+07 | KD2-H4K8la_peak_1735 | 7.22716  |                                                                       |
| 14 | 6.2E+07 | 6.2E+07 | KD2-H4K8la_peak_1736 | 7.92775  |                                                                       |
| 14 | 6.2E+07 | 6.2E+07 | KD2-H4K8la_peak_1737 | 6.3399   | CTD-2277K2.1_ENSG00000258882                                          |
| 14 | 6.4E+07 | 6.4E+07 | KD2-H4K8la_peak_1738 | 12.62032 |                                                                       |
| 14 | 6.4E+07 | 6.4E+07 | KD2-H4K8la_peak_1739 | 7.19298  | PPP2R5E_ENSG00000154001;CTD-230E22.4_ENSG00000261242                  |
| 14 | 6.4E+07 | 6.4E+07 | KD2-H4K8la_peak_1740 | 5.83285  | SYNE2_ENSG00000054654                                                 |
| 14 | 6.5E+07 | 6.5E+07 | KD2-H4K8la_peak_1741 | 5.99671  | ZBTB1_ENSG00000126804                                                 |
| 14 | 6.5E+07 | 6.5E+07 | KD2-H4K8la_peak_1742 | 12.32641 | ZBTB25_ENSG00000089775;ZBTB1_ENSG00000126804                          |
| 14 | 6.5E+07 | 6.5E+07 | KD2-H4K8la_peak_1743 | 7.49467  |                                                                       |
| 14 | 6.5E+07 | 6.5E+07 | KD2-H4K8la_peak_1744 | 8.13727  | SPTB_ENSG00000070182                                                  |
| 14 | 6.5E+07 | 6.5E+07 | KD2-H4K8la_peak_1745 | 5.8369   | RAB15_ENSG00000139998                                                 |
| 14 | 6.8E+07 | 6.8E+07 | KD2-H4K8la_peak_1746 | 5.05146  | ATP6V1D_ENSG00000100554;EIF2S1_ENSG00000134001                        |

|    |         |         |                      |          |                                                                                              |
|----|---------|---------|----------------------|----------|----------------------------------------------------------------------------------------------|
| 14 | 6.8E+07 | 6.8E+07 | KD2-H4K8la_peak_1747 | 9.78176  | PIGH_ENSG00000100564                                                                         |
| 14 | 6.8E+07 | 6.8E+07 | KD2-H4K8la_peak_1748 | 7.05576  | RAD51B_ENSG00000182185                                                                       |
| 14 | 6.9E+07 | 6.9E+07 | KD2-H4K8la_peak_1749 | 5.49688  | ZFP36L1_ENSG00000185650                                                                      |
| 14 | 6.9E+07 | 6.9E+07 | KD2-H4K8la_peak_1750 | 12.1221  |                                                                                              |
| 14 | 6.9E+07 | 6.9E+07 | KD2-H4K8la_peak_1751 | 6.86458  |                                                                                              |
| 14 | 7E+07   | 7E+07   | KD2-H4K8la_peak_1752 | 7.49467  | SRSF5_ENSG00000100650                                                                        |
| 14 | 7.1E+07 | 7.1E+07 | KD2-H4K8la_peak_1753 | 8.23729  | COX16_ENSG00000133983;RNU2-51P_ENSG00000222640                                               |
| 14 | 7.1E+07 | 7.1E+07 | KD2-H4K8la_peak_1754 | 6.3399   | CTD-2540L5.5_ENSG00000259115;CTD-2540L5.6_ENSG00000245466;TTC9_ENSG00000133985               |
| 14 | 7.2E+07 | 7.2E+07 | KD2-H4K8la_peak_1755 | 8.77936  |                                                                                              |
| 14 | 7.4E+07 | 7.4E+07 | KD2-H4K8la_peak_1756 | 8.07102  | RBM25_ENSG00000119707                                                                        |
| 14 | 7.4E+07 | 7.4E+07 | KD2-H4K8la_peak_1757 | 7.13237  | AC005280.1_ENSG00000170468;C14orf169_ENSG00000255242                                         |
| 14 | 7.4E+07 | 7.4E+07 | KD2-H4K8la_peak_1758 | 7.13528  | ACOT4_ENSG00000177465                                                                        |
| 14 | 7.4E+07 | 7.4E+07 | KD2-H4K8la_peak_1759 | 11.77509 | PTGR2_ENSG00000140043;RP5-1021I20.4_ENSG00000258653                                          |
| 14 | 7.4E+07 | 7.4E+07 | KD2-H4K8la_peak_1760 | 5.36015  | ZNF410_ENSG00000119725                                                                       |
| 14 | 7.4E+07 | 7.4E+07 | KD2-H4K8la_peak_1761 | 9.65288  | ENTPD5_ENSG00000187097;CCDC176_ENSG00000119636                                               |
| 14 | 7.5E+07 | 7.5E+07 | KD2-H4K8la_peak_1762 | 8.37064  | ABCD4_ENSG00000119688;VRTN_ENSG00000133980                                                   |
| 14 | 7.5E+07 | 7.5E+07 | KD2-H4K8la_peak_1763 | 11.5908  | AREL1_ENSG00000119682;AC007956.1_ENSG00000214670;SNORA7_ENSG00000222604;FCF1_ENSG00000119616 |
| 14 | 7.5E+07 | 7.5E+07 | KD2-H4K8la_peak_1764 | 10.28981 | DLST_ENSG00000119689                                                                         |
| 14 | 7.5E+07 | 7.5E+07 | KD2-H4K8la_peak_1765 | 7.20846  |                                                                                              |
| 14 | 7.6E+07 | 7.6E+07 | KD2-H4K8la_peak_1766 | 8.59561  | ACYP1_ENSG00000119640                                                                        |
| 14 | 7.6E+07 | 7.6E+07 | KD2-H4K8la_peak_1767 | 9.27765  | NEK9_ENSG00000119638;RP11-950C14.7_ENSG00000259138                                           |
| 14 | 7.6E+07 | 7.6E+07 | KD2-H4K8la_peak_1768 | 6.86458  | NEK9_ENSG00000119638;RP11-950C14.7_ENSG00000259138                                           |
| 14 | 7.7E+07 | 7.7E+07 | KD2-H4K8la_peak_1769 | 5.83285  |                                                                                              |
| 14 | 7.7E+07 | 7.7E+07 | KD2-H4K8la_peak_1770 | 6.64804  | RP11-99E15.2_ENSG00000258569;VASH1_ENSG00000071246                                           |
| 14 | 7.7E+07 | 7.7E+07 | KD2-H4K8la_peak_1771 | 4.30663  | VASH1_ENSG00000071246                                                                        |
| 14 | 7.7E+07 | 7.7E+07 | KD2-H4K8la_peak_1772 | 8.79494  |                                                                                              |
| 14 | 7.7E+07 | 7.7E+07 | KD2-H4K8la_peak_1773 | 6.20793  |                                                                                              |
| 14 | 7.7E+07 | 7.7E+07 | KD2-H4K8la_peak_1774 | 7.12014  |                                                                                              |
| 14 | 7.7E+07 | 7.7E+07 | KD2-H4K8la_peak_1775 | 7.81267  |                                                                                              |
| 14 | 7.7E+07 | 7.7E+07 | KD2-H4K8la_peak_1776 | 5.43278  |                                                                                              |
| 14 | 7.7E+07 | 7.7E+07 | KD2-H4K8la_peak_1777 | 5.84082  |                                                                                              |
| 14 | 7.7E+07 | 7.7E+07 | KD2-H4K8la_peak_1778 | 7.12014  | RP11-7F17.7_ENSG00000258602                                                                  |
| 14 | 7.7E+07 | 7.7E+07 | KD2-H4K8la_peak_1779 | 10.20357 | IRF2BPL_ENSG00000119669                                                                      |
| 14 | 7.7E+07 | 7.7E+07 | KD2-H4K8la_peak_1780 | 10.11868 |                                                                                              |
| 14 | 7.8E+07 | 7.8E+07 | KD2-H4K8la_peak_1781 | 7.11895  |                                                                                              |
| 14 | 7.8E+07 | 7.8E+07 | KD2-H4K8la_peak_1782 | 9.0516   |                                                                                              |
| 14 | 7.8E+07 | 7.8E+07 | KD2-H4K8la_peak_1783 | 7.83588  |                                                                                              |
| 14 | 7.8E+07 | 7.8E+07 | KD2-H4K8la_peak_1784 | 16.13355 | POMT2_ENSG0000009830;GSTZ1_ENSG00000100577                                                   |
| 14 | 7.8E+07 | 7.8E+07 | KD2-H4K8la_peak_1785 | 8.12466  | TMED8_ENSG00000100580;SAMD15_ENSG00000100583                                                 |
| 14 | 7.8E+07 | 7.8E+07 | KD2-H4K8la_peak_1786 | 7.49467  | SNW1_ENSG00000100603;C14orf178_ENSG00000197734;AC008372.1_ENSG00000268208                    |
| 14 | 7.8E+07 | 7.8E+07 | KD2-H4K8la_peak_1787 | 6.3399   |                                                                                              |
| 14 | 8.8E+07 | 8.8E+07 | KD2-H4K8la_peak_1788 | 9.0516   | GALC_ENSG00000054983                                                                         |
| 14 | 8.9E+07 | 8.9E+07 | KD2-H4K8la_peak_1789 | 11.06859 | SPATA7_ENSG00000042317                                                                       |
| 14 | 8.9E+07 | 8.9E+07 | KD2-H4K8la_peak_1790 | 5.43278  |                                                                                              |
| 14 | 8.9E+07 | 8.9E+07 | KD2-H4K8la_peak_1791 | 5.58883  |                                                                                              |
| 14 | 9E+07   | 9E+07   | KD2-H4K8la_peak_1792 | 4.86896  | FOXN3-AS1_ENSG00000258920                                                                    |

|    |         |         |                      |          |                                                         |
|----|---------|---------|----------------------|----------|---------------------------------------------------------|
| 14 | 9.1E+07 | 9.1E+07 | KD2-H4K8la_peak_1793 | 8.76116  |                                                         |
| 14 | 9.1E+07 | 9.1E+07 | KD2-H4K8la_peak_1794 | 9.78176  |                                                         |
| 14 | 9.1E+07 | 9.1E+07 | KD2-H4K8la_peak_1795 | 14.23294 | RP11-1078H9.1_ENSG00000258678;LINC00642_ENSG00000233208 |
| 14 | 9.1E+07 | 9.1E+07 | KD2-H4K8la_peak_1796 | 5.99671  |                                                         |
| 14 | 9.1E+07 | 9.1E+07 | KD2-H4K8la_peak_1797 | 8.76116  | TTC7B_ENSG00000165914                                   |
| 14 | 9.2E+07 | 9.2E+07 | KD2-H4K8la_peak_1798 | 17.34333 | GPR68_ENSG00000119714                                   |
| 14 | 9.2E+07 | 9.2E+07 | KD2-H4K8la_peak_1799 | 8.37064  |                                                         |
| 14 | 9.2E+07 | 9.2E+07 | KD2-H4K8la_peak_1800 | 5.99671  | SMEK1_ENSG00000100796                                   |
| 14 | 9.3E+07 | 9.3E+07 | KD2-H4K8la_peak_1801 | 9.86881  | NDUFB1_ENSG00000183648;CPSF2_ENSG00000165934            |
| 14 | 9.3E+07 | 9.3E+07 | KD2-H4K8la_peak_1802 | 8.39919  |                                                         |
| 14 | 9.3E+07 | 9.3E+07 | KD2-H4K8la_peak_1803 | 6.3399   |                                                         |
| 14 | 9.3E+07 | 9.3E+07 | KD2-H4K8la_peak_1804 | 7.06427  |                                                         |
| 14 | 9.4E+07 | 9.4E+07 | KD2-H4K8la_peak_1805 | 4.69635  | ITPK1_ENSG00000100605                                   |
| 14 | 9.4E+07 | 9.4E+07 | KD2-H4K8la_peak_1806 | 8.37064  |                                                         |
| 14 | 9.4E+07 | 9.4E+07 | KD2-H4K8la_peak_1807 | 5.63442  |                                                         |
| 14 | 9.4E+07 | 9.4E+07 | KD2-H4K8la_peak_1808 | 7.90495  |                                                         |
| 14 | 9.4E+07 | 9.4E+07 | KD2-H4K8la_peak_1809 | 6.25288  | PRIMA1_ENSG00000175785                                  |
| 14 | 9.4E+07 | 9.4E+07 | KD2-H4K8la_peak_1810 | 6.20477  | OTUB2_ENSG00000089723                                   |
| 14 | 9.5E+07 | 9.5E+07 | KD2-H4K8la_peak_1811 | 8.34387  | GSC_ENSG00000133937                                     |
| 14 | 9.5E+07 | 9.5E+07 | KD2-H4K8la_peak_1812 | 11.15747 |                                                         |
| 14 | 9.6E+07 | 9.6E+07 | KD2-H4K8la_peak_1813 | 7.8597   | SNHG10_ENSG00000247092                                  |
| 14 | 1E+08   | 1E+08   | KD2-H4K8la_peak_1814 | 9.37943  |                                                         |
| 14 | 1E+08   | 1E+08   | KD2-H4K8la_peak_1815 | 6.3399   | CCDC85C_ENSG00000205476;RP11-543C4.1_ENSG00000247970    |
| 14 | 1E+08   | 1E+08   | KD2-H4K8la_peak_1816 | 9.37943  |                                                         |
| 14 | 1E+08   | 1E+08   | KD2-H4K8la_peak_1817 | 11.06859 |                                                         |
| 14 | 1E+08   | 1E+08   | KD2-H4K8la_peak_1818 | 4.72651  |                                                         |
| 14 | 1E+08   | 1E+08   | KD2-H4K8la_peak_1819 | 14.33193 |                                                         |
| 14 | 1E+08   | 1E+08   | KD2-H4K8la_peak_1820 | 12.06531 |                                                         |
| 14 | 1E+08   | 1E+08   | KD2-H4K8la_peak_1821 | 8.39919  |                                                         |
| 14 | 1E+08   | 1E+08   | KD2-H4K8la_peak_1822 | 8.13557  |                                                         |
| 14 | 1E+08   | 1E+08   | KD2-H4K8la_peak_1823 | 11.06859 |                                                         |
| 14 | 1E+08   | 1E+08   | KD2-H4K8la_peak_1824 | 6.03112  |                                                         |
| 14 | 1E+08   | 1E+08   | KD2-H4K8la_peak_1825 | 9.5503   |                                                         |
| 14 | 1E+08   | 1E+08   | KD2-H4K8la_peak_1826 | 8.30479  |                                                         |
| 14 | 1E+08   | 1E+08   | KD2-H4K8la_peak_1827 | 6.86458  |                                                         |
| 14 | 1E+08   | 1E+08   | KD2-H4K8la_peak_1828 | 9.37943  |                                                         |
| 14 | 1E+08   | 1E+08   | KD2-H4K8la_peak_1829 | 9.02706  |                                                         |
| 14 | 1E+08   | 1E+08   | KD2-H4K8la_peak_1830 | 8.59042  |                                                         |
| 14 | 1E+08   | 1E+08   | KD2-H4K8la_peak_1831 | 6.25288  |                                                         |
| 14 | 1E+08   | 1E+08   | KD2-H4K8la_peak_1832 | 6.61576  |                                                         |
| 14 | 1E+08   | 1E+08   | KD2-H4K8la_peak_1833 | 13.04837 |                                                         |
| 14 | 1E+08   | 1E+08   | KD2-H4K8la_peak_1834 | 7.86505  |                                                         |
| 14 | 1E+08   | 1E+08   | KD2-H4K8la_peak_1835 | 12.11591 |                                                         |
| 14 | 1E+08   | 1E+08   | KD2-H4K8la_peak_1836 | 10.4679  |                                                         |
| 14 | 1E+08   | 1E+08   | KD2-H4K8la_peak_1837 | 7.01227  |                                                         |
| 14 | 1E+08   | 1E+08   | KD2-H4K8la_peak_1838 | 9.6656   |                                                         |



|    |       |       |                      |          |                                                                                               |
|----|-------|-------|----------------------|----------|-----------------------------------------------------------------------------------------------|
| 14 | 1E+08 | 1E+08 | KD2-H4K8la_peak_1839 | 6.2381   |                                                                                               |
| 14 | 1E+08 | 1E+08 | KD2-H4K8la_peak_1840 | 7.92775  |                                                                                               |
| 14 | 1E+08 | 1E+08 | KD2-H4K8la_peak_1841 | 7.19244  |                                                                                               |
| 14 | 1E+08 | 1E+08 | KD2-H4K8la_peak_1842 | 6.47589  |                                                                                               |
| 14 | 1E+08 | 1E+08 | KD2-H4K8la_peak_1843 | 6.11881  |                                                                                               |
| 14 | 1E+08 | 1E+08 | KD2-H4K8la_peak_1844 | 5.67596  |                                                                                               |
| 14 | 1E+08 | 1E+08 | KD2-H4K8la_peak_1845 | 6.61495  |                                                                                               |
| 14 | 1E+08 | 1E+08 | KD2-H4K8la_peak_1846 | 12.14568 |                                                                                               |
| 14 | 1E+08 | 1E+08 | KD2-H4K8la_peak_1847 | 19.16587 |                                                                                               |
| 14 | 1E+08 | 1E+08 | KD2-H4K8la_peak_1848 | 7.92775  |                                                                                               |
| 14 | 1E+08 | 1E+08 | KD2-H4K8la_peak_1849 | 8.66164  |                                                                                               |
| 14 | 1E+08 | 1E+08 | KD2-H4K8la_peak_1850 | 13.37883 |                                                                                               |
| 14 | 1E+08 | 1E+08 | KD2-H4K8la_peak_1851 | 13.47548 | MEG3_ENSG00000214548                                                                          |
| 14 | 1E+08 | 1E+08 | KD2-H4K8la_peak_1852 | 9.61894  | MEG3_ENSG00000214548                                                                          |
| 14 | 1E+08 | 1E+08 | KD2-H4K8la_peak_1853 | 11.4939  |                                                                                               |
| 14 | 1E+08 | 1E+08 | KD2-H4K8la_peak_1854 | 6.85986  |                                                                                               |
| 14 | 1E+08 | 1E+08 | KD2-H4K8la_peak_1855 | 26.07412 |                                                                                               |
| 14 | 1E+08 | 1E+08 | KD2-H4K8la_peak_1856 | 7.92775  |                                                                                               |
| 14 | 1E+08 | 1E+08 | KD2-H4K8la_peak_1857 | 5.83285  |                                                                                               |
| 14 | 1E+08 | 1E+08 | KD2-H4K8la_peak_1858 | 4.86896  |                                                                                               |
| 14 | 1E+08 | 1E+08 | KD2-H4K8la_peak_1859 | 6.13507  |                                                                                               |
| 14 | 1E+08 | 1E+08 | KD2-H4K8la_peak_1860 | 6.47266  |                                                                                               |
| 14 | 1E+08 | 1E+08 | KD2-H4K8la_peak_1861 | 7.12014  | AL117190.1_ENSG00000221077                                                                    |
| 14 | 1E+08 | 1E+08 | KD2-H4K8la_peak_1862 | 7.55141  | AL132709.1_ENSG00000230805                                                                    |
| 14 | 1E+08 | 1E+08 | KD2-H4K8la_peak_1863 | 5.36015  |                                                                                               |
| 14 | 1E+08 | 1E+08 | KD2-H4K8la_peak_1864 | 5.98041  |                                                                                               |
| 14 | 1E+08 | 1E+08 | KD2-H4K8la_peak_1865 | 7.51302  |                                                                                               |
| 14 | 1E+08 | 1E+08 | KD2-H4K8la_peak_1866 | 12.1221  |                                                                                               |
| 14 | 1E+08 | 1E+08 | KD2-H4K8la_peak_1867 | 5.83285  |                                                                                               |
| 14 | 1E+08 | 1E+08 | KD2-H4K8la_peak_1868 | 7.65547  | RP11-1017G21.5_ENSG00000271780                                                                |
| 14 | 1E+08 | 1E+08 | KD2-H4K8la_peak_1869 | 5.05146  |                                                                                               |
| 14 | 1E+08 | 1E+08 | KD2-H4K8la_peak_1870 | 4.79631  |                                                                                               |
| 14 | 1E+08 | 1E+08 | KD2-H4K8la_peak_1871 | 6.83387  |                                                                                               |
| 14 | 1E+08 | 1E+08 | KD2-H4K8la_peak_1872 | 15.16808 |                                                                                               |
| 14 | 1E+08 | 1E+08 | KD2-H4K8la_peak_1873 | 5.90392  | MIR4309_ENSG00000266015                                                                       |
| 14 | 1E+08 | 1E+08 | KD2-H4K8la_peak_1874 | 7.49467  | CTD-2555C10.3_ENSG00000259230                                                                 |
| 14 | 1E+08 | 1E+08 | KD2-H4K8la_peak_1875 | 11.15182 |                                                                                               |
| 14 | 1E+08 | 1E+08 | KD2-H4K8la_peak_1876 | 11.7362  | RCOR1_ENSG00000089902                                                                         |
| 14 | 1E+08 | 1E+08 | KD2-H4K8la_peak_1877 | 12.1221  |                                                                                               |
| 14 | 1E+08 | 1E+08 | KD2-H4K8la_peak_1878 | 4.86896  |                                                                                               |
| 14 | 1E+08 | 1E+08 | KD2-H4K8la_peak_1879 | 7.30347  | LINC00677_ENSG00000259717;TNFAIP2_ENSG00000185215                                             |
| 14 | 1E+08 | 1E+08 | KD2-H4K8la_peak_1880 | 11.45154 | RAP2CP1_ENSG00000270938                                                                       |
| 14 | 1E+08 | 1E+08 | KD2-H4K8la_peak_1881 | 7.92775  | RP11-45P15.4_ENSG00000259775;EIF5_ENSG00000100664                                             |
| 14 | 1E+08 | 1E+08 | KD2-H4K8la_peak_1882 | 7.51014  | RP11-600F24.7_ENSG00000260285;TRMT61A_ENSG00000166166                                         |
| 14 | 1E+08 | 1E+08 | KD2-H4K8la_peak_1883 | 8.12466  | BAG5_ENSG00000166170;KLC1_ENSG00000126214;RP11-73M18.2_ENSG00000256500;APOPT1_ENSG00000256053 |
| 14 | 1E+08 | 1E+08 | KD2-H4K8la_peak_1884 | 13.13367 |                                                                                               |

|    |         |         |                      |          |                                                    |
|----|---------|---------|----------------------|----------|----------------------------------------------------|
| 14 | 1E+08   | 1E+08   | KD2-H4K8la_peak_1885 | 7.92775  |                                                    |
| 14 | 1E+08   | 1E+08   | KD2-H4K8la_peak_1886 | 6.61495  |                                                    |
| 14 | 1E+08   | 1E+08   | KD2-H4K8la_peak_1887 | 5.90392  |                                                    |
| 14 | 1E+08   | 1E+08   | KD2-H4K8la_peak_1888 | 5.43278  |                                                    |
| 14 | 1E+08   | 1E+08   | KD2-H4K8la_peak_1889 | 5.58883  |                                                    |
| 14 | 1E+08   | 1E+08   | KD2-H4K8la_peak_1890 | 14.90676 | RP11-260M19.2_ENSG00000258913                      |
| 14 | 1E+08   | 1E+08   | KD2-H4K8la_peak_1891 | 8.39919  | RP11-260M19.2_ENSG00000258913                      |
| 14 | 1E+08   | 1E+08   | KD2-H4K8la_peak_1892 | 8.48488  |                                                    |
| 14 | 1E+08   | 1E+08   | KD2-H4K8la_peak_1893 | 6.3399   |                                                    |
| 14 | 1E+08   | 1E+08   | KD2-H4K8la_peak_1894 | 8.83119  |                                                    |
| 14 | 1E+08   | 1E+08   | KD2-H4K8la_peak_1895 | 8.37064  |                                                    |
| 14 | 1E+08   | 1E+08   | KD2-H4K8la_peak_1896 | 7.12972  |                                                    |
| 14 | 1E+08   | 1E+08   | KD2-H4K8la_peak_1897 | 11.7362  |                                                    |
| 14 | 1E+08   | 1E+08   | KD2-H4K8la_peak_1898 | 6.54523  |                                                    |
| 14 | 1E+08   | 1E+08   | KD2-H4K8la_peak_1899 | 5.71505  |                                                    |
| 14 | 1E+08   | 1E+08   | KD2-H4K8la_peak_1900 | 10.27876 |                                                    |
| 14 | 1E+08   | 1E+08   | KD2-H4K8la_peak_1901 | 11.45154 |                                                    |
| 14 | 1E+08   | 1E+08   | KD2-H4K8la_peak_1902 | 9.61894  |                                                    |
| 14 | 1E+08   | 1E+08   | KD2-H4K8la_peak_1903 | 7.49467  |                                                    |
| 14 | 1.1E+08 | 1.1E+08 | KD2-H4K8la_peak_1904 | 9.98668  |                                                    |
| 14 | 1.1E+08 | 1.1E+08 | KD2-H4K8la_peak_1905 | 10.87112 |                                                    |
| 14 | 1.1E+08 | 1.1E+08 | KD2-H4K8la_peak_1906 | 5.58883  | INF2_ENSG00000203485                               |
| 14 | 1.1E+08 | 1.1E+08 | KD2-H4K8la_peak_1907 | 4.6555   | SIVA1_ENSG00000184990                              |
| 14 | 1.1E+08 | 1.1E+08 | KD2-H4K8la_peak_1908 | 9.41442  | AKT1_ENSG00000142208                               |
| 14 | 1.1E+08 | 1.1E+08 | KD2-H4K8la_peak_1909 | 7.25503  | ZBTB42_ENSG00000179627                             |
| 14 | 1.1E+08 | 1.1E+08 | KD2-H4K8la_peak_1910 | 11.28887 |                                                    |
| 14 | 1.1E+08 | 1.1E+08 | KD2-H4K8la_peak_1911 | 11.15747 | C14orf79_ENSG00000140104                           |
| 14 | 1.1E+08 | 1.1E+08 | KD2-H4K8la_peak_1912 | 8.24908  | CDCA4_ENSG00000170779                              |
| 14 | 1.1E+08 | 1.1E+08 | KD2-H4K8la_peak_1913 | 9.10568  | RP11-44N21.1_ENSG00000257556                       |
| 14 | 1.1E+08 | 1.1E+08 | KD2-H4K8la_peak_1914 | 5.67596  | BTBD6_ENSG00000184887                              |
| 14 | 1.1E+08 | 1.1E+08 | KD2-H4K8la_peak_1915 | 12.69796 |                                                    |
| 14 | 1.1E+08 | 1.1E+08 | KD2-H4K8la_peak_1916 | 6.86458  | TEX22_ENSG00000226174                              |
| 14 | 1.1E+08 | 1.1E+08 | KD2-H4K8la_peak_1917 | 9.38376  | TEX22_ENSG00000226174                              |
| 14 | 1.1E+08 | 1.1E+08 | KD2-H4K8la_peak_1918 | 9.9701   | RP11-521B24.3_ENSG00000251602;MTA1_ENSG00000182979 |
| 14 | 1.1E+08 | 1.1E+08 | KD2-H4K8la_peak_1919 | 6.13507  | RP11-521B24.3_ENSG00000251602;MTA1_ENSG00000182979 |
| 14 | 1.1E+08 | 1.1E+08 | KD2-H4K8la_peak_1920 | 6.95378  |                                                    |
| 14 | 1.1E+08 | 1.1E+08 | KD2-H4K8la_peak_1921 | 8.59561  |                                                    |
| 15 | 2.3E+07 | 2.3E+07 | KD2-H4K8la_peak_1922 | 9.0516   | TUBGCP5_ENSG00000153575                            |
| 15 | 2.3E+07 | 2.3E+07 | KD2-H4K8la_peak_1923 | 5.48079  |                                                    |
| 15 | 2.3E+07 | 2.3E+07 | KD2-H4K8la_peak_1924 | 4.86896  |                                                    |
| 15 | 2.4E+07 | 2.4E+07 | KD2-H4K8la_peak_1925 | 7.13237  | MKRN3_ENSG00000179455                              |
| 15 | 2.6E+07 | 2.6E+07 | KD2-H4K8la_peak_1926 | 9.44217  | UBE3A_ENSG00000114062                              |
| 15 | 2.7E+07 | 2.7E+07 | KD2-H4K8la_peak_1927 | 5.48079  |                                                    |
| 15 | 2.9E+07 | 2.9E+07 | KD2-H4K8la_peak_1928 | 10.16316 | APBA2_ENSG00000034053                              |
| 15 | 3E+07   | 3E+07   | KD2-H4K8la_peak_1929 | 6.89612  | TJP1_ENSG00000104067                               |
| 15 | 3E+07   | 3E+07   | KD2-H4K8la_peak_1930 | 5.05146  | AC026150.5_ENSG00000225930                         |

|    |         |         |                      |          |                                                       |
|----|---------|---------|----------------------|----------|-------------------------------------------------------|
| 15 | 3.2E+07 | 3.2E+07 | KD2-H4K8la_peak_1931 | 4.35346  |                                                       |
| 15 | 3.2E+07 | 3.2E+07 | KD2-H4K8la_peak_1932 | 8.12466  | KLF13_ENSG00000169926                                 |
| 15 | 3.2E+07 | 3.2E+07 | KD2-H4K8la_peak_1933 | 5.52913  | KLF13_ENSG00000169926                                 |
| 15 | 3.2E+07 | 3.2E+07 | KD2-H4K8la_peak_1934 | 7.12014  |                                                       |
| 15 | 3.2E+07 | 3.2E+07 | KD2-H4K8la_peak_1935 | 9.20163  |                                                       |
| 15 | 3.2E+07 | 3.2E+07 | KD2-H4K8la_peak_1936 | 6.2278   |                                                       |
| 15 | 3.3E+07 | 3.3E+07 | KD2-H4K8la_peak_1937 | 9.90319  |                                                       |
| 15 | 3.4E+07 | 3.4E+07 | KD2-H4K8la_peak_1938 | 5.72892  |                                                       |
| 15 | 3.5E+07 | 3.5E+07 | KD2-H4K8la_peak_1939 | 9.0413   | EMC4_ENSG00000128463                                  |
| 15 | 3.5E+07 | 3.5E+07 | KD2-H4K8la_peak_1940 | 6.89612  | EMC4_ENSG00000128463                                  |
| 15 | 3.7E+07 | 3.7E+07 | KD2-H4K8la_peak_1941 | 6.89612  |                                                       |
| 15 | 3.8E+07 | 3.8E+07 | KD2-H4K8la_peak_1942 | 5.49688  | RP11-1008C21.2_ENSG00000236914                        |
| 15 | 4E+07   | 4E+07   | KD2-H4K8la_peak_1943 | 5.67596  | THBS1_ENSG00000137801                                 |
| 15 | 4E+07   | 4E+07   | KD2-H4K8la_peak_1944 | 9.20163  | GPR176_ENSG00000166073;RP11-325N19.3_ENSG00000246863  |
| 15 | 4.1E+07 | 4.1E+07 | KD2-H4K8la_peak_1945 | 8.72694  | DISP2_ENSG00000140323                                 |
| 15 | 4.1E+07 | 4.1E+07 | KD2-H4K8la_peak_1946 | 9.34957  |                                                       |
| 15 | 4.1E+07 | 4.1E+07 | KD2-H4K8la_peak_1947 | 10.20357 | CHST14_ENSG00000169105                                |
| 15 | 4.1E+07 | 4.1E+07 | KD2-H4K8la_peak_1948 | 6.47589  | RPUSD2_ENSG00000166133                                |
| 15 | 4.1E+07 | 4.1E+07 | KD2-H4K8la_peak_1949 | 9.9701   | RAD51-AS1_ENSG00000245849;RAD51_ENSG00000051180       |
| 15 | 4.1E+07 | 4.1E+07 | KD2-H4K8la_peak_1950 | 7.13237  | RP11-532F12.5_ENSG00000261183;SPINT1_ENSG00000166145  |
| 15 | 4.1E+07 | 4.1E+07 | KD2-H4K8la_peak_1951 | 7.49467  |                                                       |
| 15 | 4.1E+07 | 4.1E+07 | KD2-H4K8la_peak_1952 | 8.16787  |                                                       |
| 15 | 4.1E+07 | 4.1E+07 | KD2-H4K8la_peak_1953 | 5.80814  | CHAC1_ENSG00000128965                                 |
| 15 | 4.2E+07 | 4.2E+07 | KD2-H4K8la_peak_1954 | 4.94337  | EXD1_ENSG00000178997;CHP1_ENSG00000187446             |
| 15 | 4.2E+07 | 4.2E+07 | KD2-H4K8la_peak_1955 | 6.86458  | EXD1_ENSG00000178997;CHP1_ENSG00000187446             |
| 15 | 4.2E+07 | 4.2E+07 | KD2-H4K8la_peak_1956 | 7.83588  |                                                       |
| 15 | 4.2E+07 | 4.2E+07 | KD2-H4K8la_peak_1957 | 8.65116  |                                                       |
| 15 | 4.2E+07 | 4.2E+07 | KD2-H4K8la_peak_1958 | 5.99671  | SPTBN5_ENSG00000137877                                |
| 15 | 4.3E+07 | 4.3E+07 | KD2-H4K8la_peak_1959 | 7.92775  | VPS39_ENSG00000166887;RP11-546B15.1_ENSG00000261002   |
| 15 | 4.4E+07 | 4.4E+07 | KD2-H4K8la_peak_1960 | 7.33815  |                                                       |
| 15 | 4.4E+07 | 4.4E+07 | KD2-H4K8la_peak_1961 | 7.92775  | PDIA3_ENSG00000167004                                 |
| 15 | 4.4E+07 | 4.4E+07 | KD2-H4K8la_peak_1962 | 9.98668  | PDIA3_ENSG00000167004;CATSPER2P1_ENSG00000205771      |
| 15 | 4.4E+07 | 4.4E+07 | KD2-H4K8la_peak_1963 | 9.69375  | RP11-296A16.1_ENSG00000262560;SERINC4_ENSG00000184716 |
| 15 | 4.4E+07 | 4.4E+07 | KD2-H4K8la_peak_1964 | 8.12466  | FRMD5_ENSG00000171877                                 |
| 15 | 4.5E+07 | 4.5E+07 | KD2-H4K8la_peak_1965 | 5.36015  | EIF3J-AS1_ENSG00000179523;EIF3J_ENSG00000104131       |
| 15 | 4.5E+07 | 4.5E+07 | KD2-H4K8la_peak_1966 | 5.16795  |                                                       |
| 15 | 4.5E+07 | 4.5E+07 | KD2-H4K8la_peak_1967 | 9.14592  | CTD-2651B20.1_ENSG00000259539                         |
| 15 | 4.5E+07 | 4.5E+07 | KD2-H4K8la_peak_1968 | 5.79108  | CTD-2651B20.1_ENSG00000259539                         |
| 15 | 4.6E+07 | 4.6E+07 | KD2-H4K8la_peak_1969 | 5.89088  |                                                       |
| 15 | 4.6E+07 | 4.6E+07 | KD2-H4K8la_peak_1970 | 8.77936  |                                                       |
| 15 | 4.7E+07 | 4.7E+07 | KD2-H4K8la_peak_1971 | 11.36807 | SEMA6D_ENSG00000137872                                |
| 15 | 4.9E+07 | 4.9E+07 | KD2-H4K8la_peak_1972 | 13.38201 |                                                       |
| 15 | 5.1E+07 | 5.1E+07 | KD2-H4K8la_peak_1973 | 12.13455 | GABPB1_ENSG00000104064;GABPB1-AS1_ENSG00000244879     |
| 15 | 5.1E+07 | 5.1E+07 | KD2-H4K8la_peak_1974 | 4.6555   | GABPB1_ENSG00000104064;GABPB1-AS1_ENSG00000244879     |
| 15 | 5.1E+07 | 5.1E+07 | KD2-H4K8la_peak_1975 | 12.211   | USP8_ENSG00000138592                                  |
| 15 | 5.1E+07 | 5.1E+07 | KD2-H4K8la_peak_1976 | 7.51302  | USP8_ENSG00000138592                                  |

|    |         |         |                      |          |                                                      |
|----|---------|---------|----------------------|----------|------------------------------------------------------|
| 15 | 5.1E+07 | 5.1E+07 | KD2-H4K8la_peak_1977 | 9.27415  | AP4E1_ENSG00000081014                                |
| 15 | 5.2E+07 | 5.2E+07 | KD2-H4K8la_peak_1978 | 7.13237  | LEO1_ENSG00000166477                                 |
| 15 | 5.3E+07 | 5.3E+07 | KD2-H4K8la_peak_1979 | 12.32641 | MYO5C_ENSG00000128833                                |
| 15 | 5.6E+07 | 5.6E+07 | KD2-H4K8la_peak_1980 | 7.72421  |                                                      |
| 15 | 5.7E+07 | 5.7E+07 | KD2-H4K8la_peak_1981 | 6.89612  | ZNF280D_ENSG00000137871;TCF12_ENSG00000140262        |
| 15 | 5.8E+07 | 5.8E+07 | KD2-H4K8la_peak_1982 | 9.0413   |                                                      |
| 15 | 5.9E+07 | 5.9E+07 | KD2-H4K8la_peak_1983 | 10.04111 | CCNB2_ENSG00000157456                                |
| 15 | 6.2E+07 | 6.2E+07 | KD2-H4K8la_peak_1984 | 4.30663  | RORA_ENSG00000069667                                 |
| 15 | 6.2E+07 | 6.2E+07 | KD2-H4K8la_peak_1985 | 11.15747 | VPS13C_ENSG00000129003;RP11-643M14.1_ENSG00000259251 |
| 15 | 6.2E+07 | 6.2E+07 | KD2-H4K8la_peak_1986 | 5.58883  |                                                      |
| 15 | 6.3E+07 | 6.3E+07 | KD2-H4K8la_peak_1987 | 9.27415  | TLN2_ENSG00000171914                                 |
| 15 | 6.3E+07 | 6.3E+07 | KD2-H4K8la_peak_1988 | 5.72892  |                                                      |
| 15 | 6.3E+07 | 6.3E+07 | KD2-H4K8la_peak_1989 | 9.10568  | RPS27L_ENSG00000185088                               |
| 15 | 6.4E+07 | 6.4E+07 | KD2-H4K8la_peak_1990 | 7.13237  |                                                      |
| 15 | 6.4E+07 | 6.4E+07 | KD2-H4K8la_peak_1991 | 4.66473  | USP3-AS1_ENSG00000259248                             |
| 15 | 6.4E+07 | 6.4E+07 | KD2-H4K8la_peak_1992 | 10.00612 |                                                      |
| 15 | 6.5E+07 | 6.5E+07 | KD2-H4K8la_peak_1993 | 6.83387  | MTFMT_ENSG00000103707                                |
| 15 | 6.6E+07 | 6.6E+07 | KD2-H4K8la_peak_1994 | 7.51302  |                                                      |
| 15 | 6.6E+07 | 6.6E+07 | KD2-H4K8la_peak_1995 | 4.53273  |                                                      |
| 15 | 6.6E+07 | 6.6E+07 | KD2-H4K8la_peak_1996 | 9.10568  | PTPLAD1_ENSG00000074696                              |
| 15 | 6.6E+07 | 6.6E+07 | KD2-H4K8la_peak_1997 | 7.60756  |                                                      |
| 15 | 6.7E+07 | 6.7E+07 | KD2-H4K8la_peak_1998 | 6.86458  |                                                      |
| 15 | 6.7E+07 | 6.7E+07 | KD2-H4K8la_peak_1999 | 6.88801  |                                                      |
| 15 | 6.7E+07 | 6.7E+07 | KD2-H4K8la_peak_2000 | 13.20018 |                                                      |
| 15 | 6.7E+07 | 6.7E+07 | KD2-H4K8la_peak_2001 | 9.27415  |                                                      |
| 15 | 6.8E+07 | 6.8E+07 | KD2-H4K8la_peak_2002 | 7.12014  | RP11-502I4.3_ENSG00000270964;MAP2K5_ENSG00000137764  |
| 15 | 6.8E+07 | 6.8E+07 | KD2-H4K8la_peak_2003 | 5.40949  |                                                      |
| 15 | 6.9E+07 | 6.9E+07 | KD2-H4K8la_peak_2004 | 5.43278  | SPESP1_ENSG00000258484                               |
| 15 | 6.9E+07 | 6.9E+07 | KD2-H4K8la_peak_2005 | 5.47284  | SPESP1_ENSG00000258484                               |
| 15 | 7E+07   | 7E+07   | KD2-H4K8la_peak_2006 | 11.40266 | TLE3_ENSG00000140332                                 |
| 15 | 7E+07   | 7E+07   | KD2-H4K8la_peak_2007 | 5.1913   |                                                      |
| 15 | 7E+07   | 7E+07   | KD2-H4K8la_peak_2008 | 9.04068  |                                                      |
| 15 | 7E+07   | 7E+07   | KD2-H4K8la_peak_2009 | 5.28646  |                                                      |
| 15 | 7E+07   | 7E+07   | KD2-H4K8la_peak_2010 | 11.24937 |                                                      |
| 15 | 7E+07   | 7E+07   | KD2-H4K8la_peak_2011 | 5.69126  | AC011648.1_ENSG00000259252                           |
| 15 | 7.1E+07 | 7.1E+07 | KD2-H4K8la_peak_2012 | 7.13237  |                                                      |
| 15 | 7.1E+07 | 7.1E+07 | KD2-H4K8la_peak_2013 | 6.66491  |                                                      |
| 15 | 7.1E+07 | 7.1E+07 | KD2-H4K8la_peak_2014 | 7.19298  | CT62_ENSG00000225362                                 |
| 15 | 7.3E+07 | 7.3E+07 | KD2-H4K8la_peak_2015 | 7.56826  |                                                      |
| 15 | 7.3E+07 | 7.3E+07 | KD2-H4K8la_peak_2016 | 6.64804  |                                                      |
| 15 | 7.4E+07 | 7.4E+07 | KD2-H4K8la_peak_2017 | 8.44557  | CD276_ENSG00000103855                                |
| 15 | 7.4E+07 | 7.4E+07 | KD2-H4K8la_peak_2018 | 8.39919  |                                                      |
| 15 | 7.4E+07 | 7.4E+07 | KD2-H4K8la_peak_2019 | 12.32641 | RP11-247C2.2_ENSG00000248540                         |
| 15 | 7.4E+07 | 7.4E+07 | KD2-H4K8la_peak_2020 | 6.20793  |                                                      |
| 15 | 7.5E+07 | 7.5E+07 | KD2-H4K8la_peak_2021 | 17.60548 |                                                      |
| 15 | 7.5E+07 | 7.5E+07 | KD2-H4K8la_peak_2022 | 5.73914  |                                                      |

|    |         |         |                      |          |                                                      |
|----|---------|---------|----------------------|----------|------------------------------------------------------|
| 15 | 7.5E+07 | 7.5E+07 | KD2-H4K8la_peak_2023 | 8.88448  |                                                      |
| 15 | 7.5E+07 | 7.5E+07 | KD2-H4K8la_peak_2024 | 9.9701   |                                                      |
| 15 | 7.5E+07 | 7.5E+07 | KD2-H4K8la_peak_2025 | 13.68324 |                                                      |
| 15 | 7.5E+07 | 7.5E+07 | KD2-H4K8la_peak_2026 | 6.77116  | RP11-60L3.2_ENSG00000261384                          |
| 15 | 7.5E+07 | 7.5E+07 | KD2-H4K8la_peak_2027 | 11.21444 |                                                      |
| 15 | 7.5E+07 | 7.5E+07 | KD2-H4K8la_peak_2028 | 4.30663  | SEMA7A_ENSG00000138623                               |
| 15 | 7.5E+07 | 7.5E+07 | KD2-H4K8la_peak_2029 | 6.20477  | CTD-3154N5.1_ENSG00000260919                         |
| 15 | 7.5E+07 | 7.5E+07 | KD2-H4K8la_peak_2030 | 11.15747 | CSK_ENSG00000103653                                  |
| 15 | 7.5E+07 | 7.5E+07 | KD2-H4K8la_peak_2031 | 7.3993   | ULK3_ENSG00000140474                                 |
| 15 | 7.5E+07 | 7.5E+07 | KD2-H4K8la_peak_2032 | 4.75945  | COX5A_ENSG00000178741                                |
| 15 | 7.5E+07 | 7.5E+07 | KD2-H4K8la_peak_2033 | 10.28981 | COX5A_ENSG00000178741                                |
| 15 | 7.5E+07 | 7.5E+07 | KD2-H4K8la_peak_2034 | 9.9701   | RP11-151H2.1_ENSG00000260483;PPCDC_ENSG00000138621   |
| 15 | 7.5E+07 | 7.5E+07 | KD2-H4K8la_peak_2035 | 6.78512  |                                                      |
| 15 | 7.6E+07 | 7.6E+07 | KD2-H4K8la_peak_2036 | 8.06229  | NEIL1_ENSG00000140398                                |
| 15 | 7.6E+07 | 7.6E+07 | KD2-H4K8la_peak_2037 | 12.12477 | MAN2C1_ENSG00000140400;RP11-817O13.8_ENSG00000260274 |
| 15 | 7.6E+07 | 7.6E+07 | KD2-H4K8la_peak_2038 | 7.55141  | SNUPN_ENSG00000169371                                |
| 15 | 7.6E+07 | 7.6E+07 | KD2-H4K8la_peak_2039 | 5.6499   |                                                      |
| 15 | 7.6E+07 | 7.6E+07 | KD2-H4K8la_peak_2040 | 5.43278  |                                                      |
| 15 | 7.6E+07 | 7.6E+07 | KD2-H4K8la_peak_2041 | 8.07102  |                                                      |
| 15 | 7.7E+07 | 7.7E+07 | KD2-H4K8la_peak_2042 | 5.83285  | RCN2_ENSG00000117906                                 |
| 15 | 7.7E+07 | 7.7E+07 | KD2-H4K8la_peak_2043 | 10.74378 |                                                      |
| 15 | 7.8E+07 | 7.8E+07 | KD2-H4K8la_peak_2044 | 10.8046  |                                                      |
| 15 | 7.8E+07 | 7.8E+07 | KD2-H4K8la_peak_2045 | 6.61963  |                                                      |
| 15 | 7.8E+07 | 7.8E+07 | KD2-H4K8la_peak_2046 | 14.71613 | ADAMTS7P3_ENSG00000261143                            |
| 15 | 7.8E+07 | 7.8E+07 | KD2-H4K8la_peak_2047 | 8.76082  | RP11-114H24.6_ENSG00000259792                        |
| 15 | 7.8E+07 | 7.8E+07 | KD2-H4K8la_peak_2048 | 8.07102  |                                                      |
| 15 | 7.9E+07 | 7.9E+07 | KD2-H4K8la_peak_2049 | 7.61975  |                                                      |
| 15 | 7.9E+07 | 7.9E+07 | KD2-H4K8la_peak_2050 | 13.01988 |                                                      |
| 15 | 7.9E+07 | 7.9E+07 | KD2-H4K8la_peak_2051 | 4.30663  |                                                      |
| 15 | 7.9E+07 | 7.9E+07 | KD2-H4K8la_peak_2052 | 13.11108 | CHRNA3_ENSG00000080644                               |
| 15 | 7.9E+07 | 7.9E+07 | KD2-H4K8la_peak_2053 | 6.3399   |                                                      |
| 15 | 7.9E+07 | 7.9E+07 | KD2-H4K8la_peak_2054 | 5.58883  |                                                      |
| 15 | 7.9E+07 | 7.9E+07 | KD2-H4K8la_peak_2055 | 5.64417  |                                                      |
| 15 | 7.9E+07 | 7.9E+07 | KD2-H4K8la_peak_2056 | 9.05604  |                                                      |
| 15 | 7.9E+07 | 7.9E+07 | KD2-H4K8la_peak_2057 | 9.61894  |                                                      |
| 15 | 7.9E+07 | 7.9E+07 | KD2-H4K8la_peak_2058 | 9.05604  |                                                      |
| 15 | 7.9E+07 | 7.9E+07 | KD2-H4K8la_peak_2059 | 10.02595 |                                                      |
| 15 | 7.9E+07 | 7.9E+07 | KD2-H4K8la_peak_2060 | 5.27164  |                                                      |
| 15 | 7.9E+07 | 7.9E+07 | KD2-H4K8la_peak_2061 | 4.94337  |                                                      |
| 15 | 7.9E+07 | 7.9E+07 | KD2-H4K8la_peak_2062 | 7.51014  | RP11-160C18.4_ENSG00000238166                        |
| 15 | 7.9E+07 | 7.9E+07 | KD2-H4K8la_peak_2063 | 13.27013 |                                                      |
| 15 | 7.9E+07 | 7.9E+07 | KD2-H4K8la_peak_2064 | 9.05604  |                                                      |
| 15 | 7.9E+07 | 7.9E+07 | KD2-H4K8la_peak_2065 | 8.76116  |                                                      |
| 15 | 7.9E+07 | 7.9E+07 | KD2-H4K8la_peak_2066 | 9.44217  |                                                      |
| 15 | 7.9E+07 | 7.9E+07 | KD2-H4K8la_peak_2067 | 7.82875  |                                                      |
| 15 | 7.9E+07 | 7.9E+07 | KD2-H4K8la_peak_2068 | 12.35598 | ADAMTS7_ENSG00000136378                              |

|    |         |         |                      |          |                                                         |
|----|---------|---------|----------------------|----------|---------------------------------------------------------|
| 15 | 7.9E+07 | 7.9E+07 | KD2-H4K8la_peak_2069 | 8.43222  |                                                         |
| 15 | 8.1E+07 | 8.1E+07 | KD2-H4K8la_peak_2070 | 6.13507  | RP11-210M15.2_ENSG00000259495;ARNT2_ENSG00000172379     |
| 15 | 8.1E+07 | 8.1E+07 | KD2-H4K8la_peak_2071 | 8.487    | RP11-210M15.2_ENSG00000259495;ARNT2_ENSG00000172379     |
| 15 | 8.1E+07 | 8.1E+07 | KD2-H4K8la_peak_2072 | 7.12014  |                                                         |
| 15 | 8.1E+07 | 8.1E+07 | KD2-H4K8la_peak_2073 | 6.96161  |                                                         |
| 15 | 8.1E+07 | 8.1E+07 | KD2-H4K8la_peak_2074 | 8.76116  | MESDC1_ENSG00000140406                                  |
| 15 | 8.2E+07 | 8.2E+07 | KD2-H4K8la_peak_2075 | 10.98662 | MEX3B_ENSG00000183496                                   |
| 15 | 8.3E+07 | 8.3E+07 | KD2-H4K8la_peak_2076 | 5.72892  | WHAMM_ENSG00000156232                                   |
| 15 | 8.4E+07 | 8.4E+07 | KD2-H4K8la_peak_2077 | 7.86224  | C15orf40_ENSG00000169609                                |
| 15 | 8.4E+07 | 8.4E+07 | KD2-H4K8la_peak_2078 | 6.3399   | BTBD1_ENSG00000064726;MIR4515_ENSG00000263643           |
| 15 | 8.5E+07 | 8.5E+07 | KD2-H4K8la_peak_2079 | 14.52454 | UBE2Q2P11_ENSG00000259538;RP11-182J1.13_ENSG00000259774 |
| 15 | 8.5E+07 | 8.5E+07 | KD2-H4K8la_peak_2080 | 5.58883  | LINC00933_ENSG00000259728;UBE2Q2P1_ENSG00000189136      |
| 15 | 8.5E+07 | 8.5E+07 | KD2-H4K8la_peak_2081 | 6.19813  | SEC11A_ENSG00000140612                                  |
| 15 | 8.9E+07 | 8.9E+07 | KD2-H4K8la_peak_2082 | 4.53763  | AEN_ENSG00000181026                                     |
| 15 | 8.9E+07 | 8.9E+07 | KD2-H4K8la_peak_2083 | 6.26214  |                                                         |
| 15 | 9E+07   | 9E+07   | KD2-H4K8la_peak_2084 | 6.63409  |                                                         |
| 15 | 9E+07   | 9E+07   | KD2-H4K8la_peak_2085 | 10.00612 | RP11-326A19.3_ENSG00000261407;ABHD2_ENSG00000140526     |
| 15 | 9E+07   | 9E+07   | KD2-H4K8la_peak_2086 | 9.9701   | MIR9-3_ENSG00000207819                                  |
| 15 | 9E+07   | 9E+07   | KD2-H4K8la_peak_2087 | 5.58883  |                                                         |
| 15 | 9E+07   | 9E+07   | KD2-H4K8la_peak_2088 | 6.13507  |                                                         |
| 15 | 9E+07   | 9E+07   | KD2-H4K8la_peak_2089 | 7.61975  | MESP1_ENSG00000166823                                   |
| 15 | 9E+07   | 9E+07   | KD2-H4K8la_peak_2090 | 10.71653 |                                                         |
| 15 | 9E+07   | 9E+07   | KD2-H4K8la_peak_2091 | 9.10568  | ANPEP_ENSG00000166825                                   |
| 15 | 9E+07   | 9E+07   | KD2-H4K8la_peak_2092 | 8.43222  | C15orf38-AP3S2_ENSG00000250021;C15orf38_ENSG00000242498 |
| 15 | 9.1E+07 | 9.1E+07 | KD2-H4K8la_peak_2093 | 11.65627 | ZNF710_ENSG00000140548                                  |
| 15 | 9.1E+07 | 9.1E+07 | KD2-H4K8la_peak_2094 | 10.23822 |                                                         |
| 15 | 9.1E+07 | 9.1E+07 | KD2-H4K8la_peak_2095 | 7.92775  |                                                         |
| 15 | 9.2E+07 | 9.2E+07 | KD2-H4K8la_peak_2096 | 6.93796  |                                                         |
| 15 | 9.3E+07 | 9.3E+07 | KD2-H4K8la_peak_2097 | 4.35346  |                                                         |
| 15 | 9.3E+07 | 9.3E+07 | KD2-H4K8la_peak_2098 | 5.05146  |                                                         |
| 15 | 9.9E+07 | 9.9E+07 | KD2-H4K8la_peak_2099 | 7.41484  |                                                         |
| 15 | 9.9E+07 | 9.9E+07 | KD2-H4K8la_peak_2100 | 5.05146  |                                                         |
| 15 | 1E+08   | 1E+08   | KD2-H4K8la_peak_2101 | 6.64804  |                                                         |
| 15 | 1E+08   | 1E+08   | KD2-H4K8la_peak_2102 | 11.06859 |                                                         |
| 15 | 1E+08   | 1E+08   | KD2-H4K8la_peak_2103 | 13.01988 |                                                         |
| 15 | 1E+08   | 1E+08   | KD2-H4K8la_peak_2104 | 8.73887  |                                                         |
| 15 | 1E+08   | 1E+08   | KD2-H4K8la_peak_2105 | 6.96161  | ASB7_ENSG00000183475                                    |
| 15 | 1E+08   | 1E+08   | KD2-H4K8la_peak_2106 | 9.0261   |                                                         |
| 15 | 1E+08   | 1E+08   | KD2-H4K8la_peak_2107 | 5.16795  |                                                         |
| 15 | 1E+08   | 1E+08   | KD2-H4K8la_peak_2108 | 13.23192 |                                                         |
| 15 | 1E+08   | 1E+08   | KD2-H4K8la_peak_2109 | 14.47885 |                                                         |
| 15 | 1E+08   | 1E+08   | KD2-H4K8la_peak_2110 | 7.81267  |                                                         |
| 15 | 1E+08   | 1E+08   | KD2-H4K8la_peak_2111 | 4.75945  |                                                         |
| 15 | 1E+08   | 1E+08   | KD2-H4K8la_peak_2112 | 15.42498 |                                                         |
| 15 | 1E+08   | 1E+08   | KD2-H4K8la_peak_2113 | 8.07102  |                                                         |
| 15 | 1E+08   | 1E+08   | KD2-H4K8la_peak_2114 | 6.88801  |                                                         |

|    |         |         |                      |          |                                                       |
|----|---------|---------|----------------------|----------|-------------------------------------------------------|
| 15 | 1E+08   | 1E+08   | KD2-H4K8la_peak_2115 | 10.04111 |                                                       |
| 15 | 1E+08   | 1E+08   | KD2-H4K8la_peak_2116 | 8.76116  |                                                       |
| 15 | 1E+08   | 1E+08   | KD2-H4K8la_peak_2117 | 13.81576 |                                                       |
| 15 | 1E+08   | 1E+08   | KD2-H4K8la_peak_2118 | 7.41438  |                                                       |
| 15 | 1E+08   | 1E+08   | KD2-H4K8la_peak_2119 | 13.2369  |                                                       |
| 15 | 1E+08   | 1E+08   | KD2-H4K8la_peak_2120 | 7.19298  |                                                       |
| 15 | 1E+08   | 1E+08   | KD2-H4K8la_peak_2121 | 15.01131 |                                                       |
| 15 | 1E+08   | 1E+08   | KD2-H4K8la_peak_2122 | 7.3993   |                                                       |
| 15 | 1E+08   | 1E+08   | KD2-H4K8la_peak_2123 | 17.00685 |                                                       |
| 15 | 1E+08   | 1E+08   | KD2-H4K8la_peak_2124 | 6.19813  |                                                       |
| 15 | 1E+08   | 1E+08   | KD2-H4K8la_peak_2125 | 13.3197  | RP11-89K11.1_ENSG00000259658                          |
| 16 | 127151  | 128062  | KD2-H4K8la_peak_2126 | 11.15747 | RHBDF1_ENSG0000007384;MPG_ENSG00000103152             |
| 16 | 188116  | 188315  | KD2-H4K8la_peak_2127 | 8.37064  | NPRL3_ENSG00000103148                                 |
| 16 | 284166  | 284573  | KD2-H4K8la_peak_2128 | 7.31804  | ITFG3_ENSG00000167930                                 |
| 16 | 325027  | 325600  | KD2-H4K8la_peak_2129 | 7.41438  | RGS11_ENSG00000076344                                 |
| 16 | 325996  | 326218  | KD2-H4K8la_peak_2130 | 6.28277  | RGS11_ENSG00000076344                                 |
| 16 | 330101  | 330299  | KD2-H4K8la_peak_2131 | 7.3993   |                                                       |
| 16 | 330729  | 330960  | KD2-H4K8la_peak_2132 | 11.52725 |                                                       |
| 16 | 432186  | 432451  | KD2-H4K8la_peak_2133 | 9.88732  | Z97634.3_ENSG00000236829                              |
| 16 | 446849  | 447048  | KD2-H4K8la_peak_2134 | 6.96161  | NME4_ENSG00000103202                                  |
| 16 | 475931  | 476316  | KD2-H4K8la_peak_2135 | 7.19544  | RAB11FIP3_ENSG00000090565                             |
| 16 | 616474  | 616838  | KD2-H4K8la_peak_2136 | 5.98041  | PIGQ_ENSG0000007541;NHLRC4_ENSG00000257108            |
| 16 | 698911  | 699151  | KD2-H4K8la_peak_2137 | 6.25288  | AL022341.3_ENSG00000228201;WDR90_ENSG00000161996      |
| 16 | 709805  | 710050  | KD2-H4K8la_peak_2138 | 5.69126  |                                                       |
| 16 | 718223  | 718615  | KD2-H4K8la_peak_2139 | 12.23212 | RHOT2_ENSG00000140983                                 |
| 16 | 739652  | 740291  | KD2-H4K8la_peak_2140 | 9.00481  | WDR24_ENSG00000127580;LA16c-313D11.12_ENSG00000261659 |
| 16 | 740534  | 740938  | KD2-H4K8la_peak_2141 | 8.39919  | WDR24_ENSG00000127580                                 |
| 16 | 770657  | 770861  | KD2-H4K8la_peak_2142 | 8.50453  | FAM173A_ENSG00000103254                               |
| 16 | 771718  | 771919  | KD2-H4K8la_peak_2143 | 4.60174  |                                                       |
| 16 | 791195  | 791908  | KD2-H4K8la_peak_2144 | 7.61975  | NARFL_ENSG00000103245                                 |
| 16 | 857211  | 857683  | KD2-H4K8la_peak_2145 | 12.1221  |                                                       |
| 16 | 1020585 | 1020817 | KD2-H4K8la_peak_2146 | 6.36118  |                                                       |
| 16 | 1401439 | 1401714 | KD2-H4K8la_peak_2147 | 7.49467  | TSR3_ENSG0000007520;GNPTG_ENSG00000090581             |
| 16 | 1470341 | 1470604 | KD2-H4K8la_peak_2148 | 7.48323  |                                                       |
| 16 | 1471559 | 1471855 | KD2-H4K8la_peak_2149 | 6.25495  |                                                       |
| 16 | 1480571 | 1481024 | KD2-H4K8la_peak_2150 | 5.83285  |                                                       |
| 16 | 1524648 | 1524971 | KD2-H4K8la_peak_2151 | 6.89612  | CLCN7_ENSG00000103249                                 |
| 16 | 1664695 | 1665048 | KD2-H4K8la_peak_2152 | 8.76116  |                                                       |
| 16 | 1823294 | 1823858 | KD2-H4K8la_peak_2153 | 10.12382 | MRPS34_ENSG00000074071;EME2_ENSG00000197774           |
| 16 | 1877312 | 1877567 | KD2-H4K8la_peak_2154 | 7.92775  | HAGH_ENSG00000063854;FAHD1_ENSG00000180185            |
| 16 | 1922710 | 1922926 | KD2-H4K8la_peak_2155 | 8.86558  |                                                       |
| 16 | 1959474 | 1959938 | KD2-H4K8la_peak_2156 | 5.43278  |                                                       |
| 16 | 1979996 | 1980219 | KD2-H4K8la_peak_2157 | 8.13557  |                                                       |
| 16 | 1982446 | 1982810 | KD2-H4K8la_peak_2158 | 10.98662 |                                                       |
| 16 | 2009782 | 2010016 | KD2-H4K8la_peak_2159 | 5.8369   | NDUFB10_ENSG00000140990                               |
| 16 | 2088545 | 2089009 | KD2-H4K8la_peak_2160 | 21.13867 |                                                       |

|    |         |         |                      |          |                                                 |
|----|---------|---------|----------------------|----------|-------------------------------------------------|
| 16 | 2089883 | 2090571 | KD2-H4K8la_peak_2161 | 8.44557  |                                                 |
| 16 | 2172720 | 2172920 | KD2-H4K8la_peak_2162 | 7.72519  |                                                 |
| 16 | 2173391 | 2175042 | KD2-H4K8la_peak_2163 | 12.85404 |                                                 |
| 16 | 2175477 | 2175905 | KD2-H4K8la_peak_2164 | 7.12014  |                                                 |
| 16 | 2198839 | 2199045 | KD2-H4K8la_peak_2165 | 4.66473  |                                                 |
| 16 | 2265912 | 2266226 | KD2-H4K8la_peak_2166 | 4.94337  |                                                 |
| 16 | 2272870 | 2273280 | KD2-H4K8la_peak_2167 | 9.98668  | E4F1_ENSG00000167967                            |
| 16 | 2301854 | 2302064 | KD2-H4K8la_peak_2168 | 11.20341 | ECI1_ENSG00000167969                            |
| 16 | 2391172 | 2391369 | KD2-H4K8la_peak_2169 | 8.12466  | ABCA3_ENSG00000167972                           |
| 16 | 2478591 | 2478955 | KD2-H4K8la_peak_2170 | 9.55813  | CCNF_ENSG00000162063                            |
| 16 | 2479532 | 2479791 | KD2-H4K8la_peak_2171 | 9.6656   | CCNF_ENSG00000162063                            |
| 16 | 2517168 | 2517555 | KD2-H4K8la_peak_2172 | 5.93538  | RP11-715J22.2_ENSG00000259895                   |
| 16 | 2517878 | 2518281 | KD2-H4K8la_peak_2173 | 10.80993 | RP11-715J22.2_ENSG00000259895                   |
| 16 | 2518881 | 2519088 | KD2-H4K8la_peak_2174 | 11.81269 | RP11-715J22.2_ENSG00000259895                   |
| 16 | 2519633 | 2519831 | KD2-H4K8la_peak_2175 | 6.9399   |                                                 |
| 16 | 2653511 | 2654025 | KD2-H4K8la_peak_2176 | 5.58883  | AC141586.5_ENSG00000215154                      |
| 16 | 2732639 | 2732944 | KD2-H4K8la_peak_2177 | 8.12466  | KCTD5_ENSG00000167977                           |
| 16 | 2770636 | 2771057 | KD2-H4K8la_peak_2178 | 6.86458  | PRSS27_ENSG00000172382                          |
| 16 | 2775000 | 2775210 | KD2-H4K8la_peak_2179 | 6.01294  |                                                 |
| 16 | 2803177 | 2803430 | KD2-H4K8la_peak_2180 | 7.87573  | SRRM2-AS1_ENSG00000205913;SRRM2_ENSG00000167978 |
| 16 | 2826800 | 2827085 | KD2-H4K8la_peak_2181 | 9.73848  | TCEB2_ENSG00000103363                           |
| 16 | 2827517 | 2827914 | KD2-H4K8la_peak_2182 | 8.7731   | TCEB2_ENSG00000103363                           |
| 16 | 2902437 | 2902665 | KD2-H4K8la_peak_2183 | 8.0046   |                                                 |
| 16 | 2917889 | 2918111 | KD2-H4K8la_peak_2184 | 10.27876 | LA16c-325D7.2_ENSG00000263280                   |
| 16 | 3018652 | 3018953 | KD2-H4K8la_peak_2185 | 8.37064  | PAQR4_ENSG00000162073                           |
| 16 | 3030824 | 3031179 | KD2-H4K8la_peak_2186 | 7.12014  | PKMYT1_ENSG00000127564                          |
| 16 | 3109651 | 3110121 | KD2-H4K8la_peak_2187 | 7.13185  | RP11-473M20.7_ENSG00000261971                   |
| 16 | 3151195 | 3151393 | KD2-H4K8la_peak_2188 | 8.487    |                                                 |
| 16 | 3156156 | 3156425 | KD2-H4K8la_peak_2189 | 14.23294 | RP11-473M20.11_ENSG00000263011                  |
| 16 | 3162648 | 3162987 | KD2-H4K8la_peak_2190 | 6.13507  | ZNF205_ENSG00000122386                          |
| 16 | 3215711 | 3216004 | KD2-H4K8la_peak_2191 | 6.04152  |                                                 |
| 16 | 3355160 | 3355386 | KD2-H4K8la_peak_2192 | 11.52725 | TIGD7_ENSG00000140993;ZNF75A_ENSG00000162086    |
| 16 | 3355651 | 3356036 | KD2-H4K8la_peak_2193 | 14.67686 | TIGD7_ENSG00000140993;ZNF75A_ENSG00000162086    |
| 16 | 3931025 | 3931608 | KD2-H4K8la_peak_2194 | 9.20163  | CREBBP_ENSG00000005339                          |
| 16 | 4233436 | 4233794 | KD2-H4K8la_peak_2195 | 6.68593  | RP11-95P2.3_ENSG00000263105                     |
| 16 | 4322200 | 4322732 | KD2-H4K8la_peak_2196 | 6.13507  | TFAP4_ENSG00000090447                           |
| 16 | 4365259 | 4365708 | KD2-H4K8la_peak_2197 | 9.27415  |                                                 |
| 16 | 4378173 | 4378750 | KD2-H4K8la_peak_2198 | 5.58883  | AC005356.1_ENSG00000262686                      |
| 16 | 4441681 | 4441950 | KD2-H4K8la_peak_2199 | 10.91315 |                                                 |
| 16 | 4442195 | 4442658 | KD2-H4K8la_peak_2200 | 10.20357 |                                                 |
| 16 | 4665119 | 4665510 | KD2-H4K8la_peak_2201 | 9.67249  | UBALD1_ENSG00000153443;MGRN1_ENSG00000102858    |
| 16 | 4819039 | 4819245 | KD2-H4K8la_peak_2202 | 8.76116  |                                                 |
| 16 | 5553211 | 5553542 | KD2-H4K8la_peak_2203 | 5.83285  |                                                 |
| 16 | 8715604 | 8715812 | KD2-H4K8la_peak_2204 | 6.86458  | METTL22_ENSG00000067365                         |
| 16 | 9184015 | 9184544 | KD2-H4K8la_peak_2205 | 9.67249  | C16orf72_ENSG00000182831                        |
| 16 | 1.1E+07 | 1.1E+07 | KD2-H4K8la_peak_2206 | 6.64804  |                                                 |



|    |         |         |                      |          |                                                                    |
|----|---------|---------|----------------------|----------|--------------------------------------------------------------------|
| 16 | 1.1E+07 | 1.1E+07 | KD2-H4K8la_peak_2207 | 13.73665 | TVP23A_ENSG00000166676                                             |
| 16 | 1.1E+07 | 1.1E+07 | KD2-H4K8la_peak_2208 | 5.89088  |                                                                    |
| 16 | 1.1E+07 | 1.1E+07 | KD2-H4K8la_peak_2209 | 5.67596  | SOCS1_ENSG00000185338                                              |
| 16 | 1.1E+07 | 1.1E+07 | KD2-H4K8la_peak_2210 | 8.65116  |                                                                    |
| 16 | 1.2E+07 | 1.2E+07 | KD2-H4K8la_peak_2211 | 8.65116  |                                                                    |
| 16 | 1.2E+07 | 1.2E+07 | KD2-H4K8la_peak_2212 | 5.33301  |                                                                    |
| 16 | 1.2E+07 | 1.2E+07 | KD2-H4K8la_peak_2213 | 11.30277 |                                                                    |
| 16 | 1.5E+07 | 1.5E+07 | KD2-H4K8la_peak_2214 | 5.58883  |                                                                    |
| 16 | 1.5E+07 | 1.5E+07 | KD2-H4K8la_peak_2215 | 8.37064  | NTAN1_ENSG00000157045                                              |
| 16 | 1.5E+07 | 1.5E+07 | KD2-H4K8la_peak_2216 | 11.52725 |                                                                    |
| 16 | 1.5E+07 | 1.5E+07 | KD2-H4K8la_peak_2217 | 8.50453  |                                                                    |
| 16 | 1.5E+07 | 1.5E+07 | KD2-H4K8la_peak_2218 | 9.66714  |                                                                    |
| 16 | 1.5E+07 | 1.5E+07 | KD2-H4K8la_peak_2219 | 7.49467  | RP11-1021N1.1_ENSG00000261130;MPV17L_ENSG00000156968               |
| 16 | 1.6E+07 | 1.6E+07 | KD2-H4K8la_peak_2220 | 7.16004  | C16orf45_ENSG00000166780                                           |
| 16 | 1.7E+07 | 1.7E+07 | KD2-H4K8la_peak_2221 | 5.83285  |                                                                    |
| 16 | 1.8E+07 | 1.8E+07 | KD2-H4K8la_peak_2222 | 5.72892  |                                                                    |
| 16 | 1.9E+07 | 1.9E+07 | KD2-H4K8la_peak_2223 | 8.487    | TMC7_ENSG00000170537                                               |
| 16 | 1.9E+07 | 1.9E+07 | KD2-H4K8la_peak_2224 | 6.39383  |                                                                    |
| 16 | 2E+07   | 2E+07   | KD2-H4K8la_peak_2225 | 7.30722  | C16orf62_ENSG00000103544                                           |
| 16 | 2.1E+07 | 2.1E+07 | KD2-H4K8la_peak_2226 | 10.12162 | ERI2_ENSG00000196678;DCUN1D3_ENSG00000188215;LYRM1_ENSG00000102897 |
| 16 | 2.2E+07 | 2.2E+07 | KD2-H4K8la_peak_2227 | 6.03683  | CTD-2547E10.2_ENSG00000180747;SLC7A5P2_ENSG00000258186             |
| 16 | 2.2E+07 | 2.2E+07 | KD2-H4K8la_peak_2228 | 4.51055  | EEF2K_ENSG00000103319                                              |
| 16 | 2.2E+07 | 2.2E+07 | KD2-H4K8la_peak_2229 | 6.36118  | POLR3E_ENSG00000058600                                             |
| 16 | 2.3E+07 | 2.3E+07 | KD2-H4K8la_peak_2230 | 6.3399   |                                                                    |
| 16 | 2.4E+07 | 2.4E+07 | KD2-H4K8la_peak_2231 | 5.67596  |                                                                    |
| 16 | 2.5E+07 | 2.5E+07 | KD2-H4K8la_peak_2232 | 6.60352  | ARHGAP17_ENSG00000140750;RP11-266L9.1_ENSG00000260714              |
| 16 | 2.5E+07 | 2.5E+07 | KD2-H4K8la_peak_2233 | 8.37064  | RP11-266L9.5_ENSG00000262155                                       |
| 16 | 2.7E+07 | 2.7E+07 | KD2-H4K8la_peak_2234 | 10.19807 |                                                                    |
| 16 | 2.7E+07 | 2.7E+07 | KD2-H4K8la_peak_2235 | 16.8445  | NSMCE1_ENSG00000169189;CTD-3203P2.2_ENSG00000245888                |
| 16 | 2.8E+07 | 2.8E+07 | KD2-H4K8la_peak_2236 | 9.37943  |                                                                    |
| 16 | 2.9E+07 | 2.9E+07 | KD2-H4K8la_peak_2237 | 22.53907 | ATXN2L_ENSG00000168488                                             |
| 16 | 2.9E+07 | 2.9E+07 | KD2-H4K8la_peak_2238 | 7.30722  | RP11-22P6.2_ENSG00000261766                                        |
| 16 | 2.9E+07 | 2.9E+07 | KD2-H4K8la_peak_2239 | 8.37064  | RP11-22P6.3_ENSG00000260442                                        |
| 16 | 2.9E+07 | 2.9E+07 | KD2-H4K8la_peak_2240 | 7.55141  |                                                                    |
| 16 | 2.9E+07 | 2.9E+07 | KD2-H4K8la_peak_2241 | 6.47589  | NFATC2IP_ENSG00000176953                                           |
| 16 | 2.9E+07 | 2.9E+07 | KD2-H4K8la_peak_2242 | 6.61495  |                                                                    |
| 16 | 2.9E+07 | 2.9E+07 | KD2-H4K8la_peak_2243 | 10.04113 |                                                                    |
| 16 | 2.9E+07 | 2.9E+07 | KD2-H4K8la_peak_2244 | 8.37064  |                                                                    |
| 16 | 2.9E+07 | 2.9E+07 | KD2-H4K8la_peak_2245 | 9.61894  |                                                                    |
| 16 | 2.9E+07 | 2.9E+07 | KD2-H4K8la_peak_2246 | 6.2278   |                                                                    |
| 16 | 2.9E+07 | 2.9E+07 | KD2-H4K8la_peak_2247 | 8.76116  |                                                                    |
| 16 | 2.9E+07 | 2.9E+07 | KD2-H4K8la_peak_2248 | 8.95597  |                                                                    |
| 16 | 2.9E+07 | 2.9E+07 | KD2-H4K8la_peak_2249 | 6.13507  |                                                                    |
| 16 | 2.9E+07 | 2.9E+07 | KD2-H4K8la_peak_2250 | 5.83285  |                                                                    |
| 16 | 2.9E+07 | 2.9E+07 | KD2-H4K8la_peak_2251 | 10.70453 |                                                                    |
| 16 | 3E+07   | 3E+07   | KD2-H4K8la_peak_2252 | 9.20163  | MAZ_ENSG00000103495;AC009133.15_ENSG00000259952                    |

|    |         |         |                      |          |                                                                           |
|----|---------|---------|----------------------|----------|---------------------------------------------------------------------------|
| 16 | 3E+07   | 3E+07   | KD2-H4K8la_peak_2253 | 9.35473  | CDIPT_ENSG00000103502;CDIPT-AS1_ENSG00000214725                           |
| 16 | 3E+07   | 3E+07   | KD2-H4K8la_peak_2254 | 9.0516   | KCTD13_ENSG00000174943;CTD-2574D22.2_ENSG00000247735                      |
| 16 | 3E+07   | 3E+07   | KD2-H4K8la_peak_2255 | 5.33301  |                                                                           |
| 16 | 3E+07   | 3E+07   | KD2-H4K8la_peak_2256 | 9.64487  | YPEL3_ENSG00000090238;RP11-455F5.3_ENSG00000250616                        |
| 16 | 3E+07   | 3E+07   | KD2-H4K8la_peak_2257 | 6.86759  | MAPK3_ENSG00000102882                                                     |
| 16 | 3E+07   | 3E+07   | KD2-H4K8la_peak_2258 | 4.37527  |                                                                           |
| 16 | 3E+07   | 3E+07   | KD2-H4K8la_peak_2259 | 10.74378 | CORO1A_ENSG00000102879                                                    |
| 16 | 3E+07   | 3E+07   | KD2-H4K8la_peak_2260 | 4.66473  | CD2BP2_ENSG00000169217;RP11-347C12.10_ENSG00000260219                     |
| 16 | 3.1E+07 | 3.1E+07 | KD2-H4K8la_peak_2261 | 6.40658  | ZNF768_ENSG00000169957                                                    |
| 16 | 3.1E+07 | 3.1E+07 | KD2-H4K8la_peak_2262 | 11.99163 | ZNF747_ENSG00000169955;ZNF747_ENSG00000261459;AC002310.12_ENSG00000235560 |
| 16 | 3.1E+07 | 3.1E+07 | KD2-H4K8la_peak_2263 | 6.86458  | AC002310.13_ENSG00000260869;ZNF764_ENSG00000169951                        |
| 16 | 3.1E+07 | 3.1E+07 | KD2-H4K8la_peak_2264 | 10.02595 | AC002310.13_ENSG00000260869;ZNF764_ENSG00000169951                        |
| 16 | 3.1E+07 | 3.1E+07 | KD2-H4K8la_peak_2265 | 6.47266  | ZNF688_ENSG00000229809;AC002310.7_ENSG00000239791                         |
| 16 | 3.1E+07 | 3.1E+07 | KD2-H4K8la_peak_2266 | 9.27415  | ZNF785_ENSG00000197162;RP11-146F11.5_ENSG00000260167                      |
| 16 | 3.1E+07 | 3.1E+07 | KD2-H4K8la_peak_2267 | 5.05146  |                                                                           |
| 16 | 3.1E+07 | 3.1E+07 | KD2-H4K8la_peak_2268 | 7.49467  |                                                                           |
| 16 | 3.1E+07 | 3.1E+07 | KD2-H4K8la_peak_2269 | 12.17279 | RP11-146F11.1_ENSG00000261840;SRCAP_ENSG00000080603                       |
| 16 | 3.1E+07 | 3.1E+07 | KD2-H4K8la_peak_2270 | 7.49467  |                                                                           |
| 16 | 3.1E+07 | 3.1E+07 | KD2-H4K8la_peak_2271 | 10.00612 | ZNF629_ENSG00000102870                                                    |
| 16 | 3.1E+07 | 3.1E+07 | KD2-H4K8la_peak_2272 | 7.7007   |                                                                           |
| 16 | 3.1E+07 | 3.1E+07 | KD2-H4K8la_peak_2273 | 8.76082  |                                                                           |
| 16 | 3.1E+07 | 3.1E+07 | KD2-H4K8la_peak_2274 | 9.73495  | BCL7C_ENSG00000099385;MIR762_ENSG00000211591                              |
| 16 | 3.1E+07 | 3.1E+07 | KD2-H4K8la_peak_2275 | 8.16787  | AC106782.20_ENSG00000262721;CTF1_ENSG00000150281                          |
| 16 | 3.1E+07 | 3.1E+07 | KD2-H4K8la_peak_2276 | 7.13185  |                                                                           |
| 16 | 3.1E+07 | 3.1E+07 | KD2-H4K8la_peak_2277 | 7.06427  | STX1B_ENSG00000099365                                                     |
| 16 | 3.1E+07 | 3.1E+07 | KD2-H4K8la_peak_2278 | 12.36938 | STX4_ENSG00000103496                                                      |
| 16 | 3.1E+07 | 3.1E+07 | KD2-H4K8la_peak_2279 | 9.6656   | BCKDK_ENSG00000103507                                                     |
| 16 | 3.1E+07 | 3.1E+07 | KD2-H4K8la_peak_2280 | 15.58875 |                                                                           |
| 16 | 3.1E+07 | 3.1E+07 | KD2-H4K8la_peak_2281 | 7.49467  | ZNF843_ENSG00000176723                                                    |
| 16 | 3.1E+07 | 3.1E+07 | KD2-H4K8la_peak_2282 | 5.83285  |                                                                           |
| 16 | 3.2E+07 | 3.2E+07 | KD2-H4K8la_peak_2283 | 9.90319  | ZNF720_ENSG00000197302                                                    |
| 16 | 3.2E+07 | 3.2E+07 | KD2-H4K8la_peak_2284 | 6.56022  | RP11-56L13.7_ENSG00000260575                                              |
| 16 | 3.4E+07 | 3.4E+07 | KD2-H4K8la_peak_2285 | 7.82372  | RARRES2P6_ENSG00000261010                                                 |
| 16 | 3.5E+07 | 3.5E+07 | KD2-H4K8la_peak_2286 | 5.58883  | RP11-488I20.4_ENSG00000260480                                             |
| 16 | 3.5E+07 | 3.5E+07 | KD2-H4K8la_peak_2287 | 4.86896  | RP11-488I20.2_ENSG00000260291                                             |
| 16 | 4.7E+07 | 4.7E+07 | KD2-H4K8la_peak_2288 | 7.13237  | NETO2_ENSG00000171208;RP11-329J18.2_ENSG00000260281                       |
| 16 | 4.8E+07 | 4.8E+07 | KD2-H4K8la_peak_2289 | 10.49982 |                                                                           |
| 16 | 4.9E+07 | 4.9E+07 | KD2-H4K8la_peak_2290 | 7.51014  |                                                                           |
| 16 | 5E+07   | 5E+07   | KD2-H4K8la_peak_2291 | 11.21258 |                                                                           |
| 16 | 5E+07   | 5E+07   | KD2-H4K8la_peak_2292 | 6.64804  |                                                                           |
| 16 | 5E+07   | 5E+07   | KD2-H4K8la_peak_2293 | 5.83285  |                                                                           |
| 16 | 5E+07   | 5E+07   | KD2-H4K8la_peak_2294 | 7.94927  |                                                                           |
| 16 | 5E+07   | 5E+07   | KD2-H4K8la_peak_2295 | 13.11108 |                                                                           |
| 16 | 5E+07   | 5E+07   | KD2-H4K8la_peak_2296 | 10.04113 |                                                                           |
| 16 | 5E+07   | 5E+07   | KD2-H4K8la_peak_2297 | 8.39919  |                                                                           |
| 16 | 5E+07   | 5E+07   | KD2-H4K8la_peak_2298 | 10.20357 |                                                                           |

|    |         |         |                      |          |                                                                                  |
|----|---------|---------|----------------------|----------|----------------------------------------------------------------------------------|
| 16 | 5E+07   | 5E+07   | KD2-H4K8la_peak_2299 | 4.30663  |                                                                                  |
| 16 | 5E+07   | 5E+07   | KD2-H4K8la_peak_2300 | 7.13237  | ADCY7_ENSG00000121281                                                            |
| 16 | 5E+07   | 5E+07   | KD2-H4K8la_peak_2301 | 7.13237  | ADCY7_ENSG00000121281                                                            |
| 16 | 5E+07   | 5E+07   | KD2-H4K8la_peak_2302 | 12.97817 |                                                                                  |
| 16 | 5.3E+07 | 5.3E+07 | KD2-H4K8la_peak_2303 | 7.13237  |                                                                                  |
| 16 | 5.3E+07 | 5.3E+07 | KD2-H4K8la_peak_2304 | 6.2278   |                                                                                  |
| 16 | 5.3E+07 | 5.3E+07 | KD2-H4K8la_peak_2305 | 5.95337  |                                                                                  |
| 16 | 5.5E+07 | 5.5E+07 | KD2-H4K8la_peak_2306 | 4.53273  |                                                                                  |
| 16 | 5.6E+07 | 5.6E+07 | KD2-H4K8la_peak_2307 | 5.30505  |                                                                                  |
| 16 | 5.6E+07 | 5.6E+07 | KD2-H4K8la_peak_2308 | 9.29932  |                                                                                  |
| 16 | 5.6E+07 | 5.6E+07 | KD2-H4K8la_peak_2309 | 7.3993   | RP11-461O7.1_ENSG00000246379;GNAO1_ENSG00000087258                               |
| 16 | 5.7E+07 | 5.7E+07 | KD2-H4K8la_peak_2310 | 8.43222  | BBS2_ENSG00000125124                                                             |
| 16 | 5.7E+07 | 5.7E+07 | KD2-H4K8la_peak_2311 | 8.13557  | HERPUD1_ENSG00000051108                                                          |
| 16 | 5.7E+07 | 5.7E+07 | KD2-H4K8la_peak_2312 | 13.11108 |                                                                                  |
| 16 | 5.7E+07 | 5.7E+07 | KD2-H4K8la_peak_2313 | 9.14988  | RP11-407G23.1_ENSG00000260148;CPNE2_ENSG00000140848                              |
| 16 | 5.7E+07 | 5.7E+07 | KD2-H4K8la_peak_2314 | 5.05146  |                                                                                  |
| 16 | 5.8E+07 | 5.8E+07 | KD2-H4K8la_peak_2315 | 5.58883  |                                                                                  |
| 16 | 5.8E+07 | 5.8E+07 | KD2-H4K8la_peak_2316 | 7.61975  |                                                                                  |
| 16 | 5.8E+07 | 5.8E+07 | KD2-H4K8la_peak_2317 | 10.0408  |                                                                                  |
| 16 | 5.8E+07 | 5.8E+07 | KD2-H4K8la_peak_2318 | 8.06229  | CCDC102A_ENSG00000135736                                                         |
| 16 | 5.8E+07 | 5.8E+07 | KD2-H4K8la_peak_2319 | 9.96333  | CCDC135_ENSG00000159625                                                          |
| 16 | 5.8E+07 | 5.8E+07 | KD2-H4K8la_peak_2320 | 7.06427  |                                                                                  |
| 16 | 6.7E+07 | 6.7E+07 | KD2-H4K8la_peak_2321 | 15.91733 | Y_RNA_ENSG00000261519                                                            |
| 16 | 6.7E+07 | 6.7E+07 | KD2-H4K8la_peak_2322 | 9.20163  | TK2_ENSG00000166548;CKLF_ENSG00000217555;CKLF-CMTM1_ENSG00000254788              |
| 16 | 6.7E+07 | 6.7E+07 | KD2-H4K8la_peak_2323 | 6.3399   | DYNC11L2_ENSG00000135720;RP11-61A14.4_ENSG00000246777                            |
| 16 | 6.7E+07 | 6.7E+07 | KD2-H4K8la_peak_2324 | 7.19298  | CES3_ENSG00000172828                                                             |
| 16 | 6.7E+07 | 6.7E+07 | KD2-H4K8la_peak_2325 | 6.64804  |                                                                                  |
| 16 | 6.7E+07 | 6.7E+07 | KD2-H4K8la_peak_2326 | 5.23773  |                                                                                  |
| 16 | 6.7E+07 | 6.7E+07 | KD2-H4K8la_peak_2327 | 11.06859 | CBFB_ENSG00000067955                                                             |
| 16 | 6.7E+07 | 6.7E+07 | KD2-H4K8la_peak_2328 | 8.43222  | B3GNT9_ENSG00000237172                                                           |
| 16 | 6.7E+07 | 6.7E+07 | KD2-H4K8la_peak_2329 | 7.56395  |                                                                                  |
| 16 | 6.7E+07 | 6.7E+07 | KD2-H4K8la_peak_2330 | 13.73095 |                                                                                  |
| 16 | 6.8E+07 | 6.8E+07 | KD2-H4K8la_peak_2331 | 6.83387  | ATP6V0D1_ENSG00000159720;RP11-297D21.4_ENSG00000270049                           |
| 16 | 6.8E+07 | 6.8E+07 | KD2-H4K8la_peak_2332 | 7.61975  | CTD-2012K14.6_ENSG00000261386;CTD-2012K14.7_ENSG00000259804;CTCF_ENSG00000102974 |
| 16 | 6.8E+07 | 6.8E+07 | KD2-H4K8la_peak_2333 | 11.40266 | NUTF2_ENSG00000102898                                                            |
| 16 | 6.8E+07 | 6.8E+07 | KD2-H4K8la_peak_2334 | 9.5329   | EDC4_ENSG00000038358                                                             |
| 16 | 6.8E+07 | 6.8E+07 | KD2-H4K8la_peak_2335 | 7.79412  | SLC12A4_ENSG00000124067                                                          |
| 16 | 6.8E+07 | 6.8E+07 | KD2-H4K8la_peak_2336 | 11.20341 | DDX28_ENSG00000182810                                                            |
| 16 | 6.8E+07 | 6.8E+07 | KD2-H4K8la_peak_2337 | 11.15747 | NFATC3_ENSG00000072736                                                           |
| 16 | 6.8E+07 | 6.8E+07 | KD2-H4K8la_peak_2338 | 6.13507  | SLC7A6_ENSG00000103064                                                           |
| 16 | 6.9E+07 | 6.9E+07 | KD2-H4K8la_peak_2339 | 7.12014  | ZFP90_ENSG00000184939                                                            |
| 16 | 6.9E+07 | 6.9E+07 | KD2-H4K8la_peak_2340 | 11.06859 |                                                                                  |
| 16 | 6.9E+07 | 6.9E+07 | KD2-H4K8la_peak_2341 | 10.49982 | PDF_ENSG00000258429                                                              |
| 16 | 7E+07   | 7E+07   | KD2-H4K8la_peak_2342 | 5.70367  |                                                                                  |
| 16 | 7E+07   | 7E+07   | KD2-H4K8la_peak_2343 | 6.36044  |                                                                                  |
| 16 | 7E+07   | 7E+07   | KD2-H4K8la_peak_2344 | 6.3399   | AARS_ENSG00000090861;DDX19B_ENSG00000157349                                      |

|    |         |         |                      |          |                                                     |
|----|---------|---------|----------------------|----------|-----------------------------------------------------|
| 16 | 7E+07   | 7E+07   | KD2-H4K8la_peak_2345 | 6.61495  |                                                     |
| 16 | 7.1E+07 | 7.1E+07 | KD2-H4K8la_peak_2346 | 6.70626  | HYDIN_ENSG00000157423                               |
| 16 | 7.1E+07 | 7.1E+07 | KD2-H4K8la_peak_2347 | 4.75945  | RP11-510M2.2_ENSG00000247324                        |
| 16 | 7.2E+07 | 7.2E+07 | KD2-H4K8la_peak_2348 | 9.0413   |                                                     |
| 16 | 7.2E+07 | 7.2E+07 | KD2-H4K8la_peak_2349 | 4.86896  | AP1G1_ENSG00000166747                               |
| 16 | 7.2E+07 | 7.2E+07 | KD2-H4K8la_peak_2350 | 6.2278   | AP1G1_ENSG00000166747                               |
| 16 | 7.2E+07 | 7.2E+07 | KD2-H4K8la_peak_2351 | 4.6555   | ATXN1L_ENSG00000224470;IST1_ENSG00000182149         |
| 16 | 7.2E+07 | 7.2E+07 | KD2-H4K8la_peak_2352 | 9.35473  | ZNF821_ENSG00000102984                              |
| 16 | 7.2E+07 | 7.2E+07 | KD2-H4K8la_peak_2353 | 7.83588  |                                                     |
| 16 | 7.3E+07 | 7.3E+07 | KD2-H4K8la_peak_2354 | 5.36015  |                                                     |
| 16 | 7.4E+07 | 7.4E+07 | KD2-H4K8la_peak_2355 | 10.34978 |                                                     |
| 16 | 7.5E+07 | 7.5E+07 | KD2-H4K8la_peak_2356 | 4.86896  |                                                     |
| 16 | 7.5E+07 | 7.5E+07 | KD2-H4K8la_peak_2357 | 11.20341 |                                                     |
| 16 | 7.5E+07 | 7.5E+07 | KD2-H4K8la_peak_2358 | 10.02595 |                                                     |
| 16 | 7.5E+07 | 7.5E+07 | KD2-H4K8la_peak_2359 | 5.52913  | CFDP1_ENSG00000153774                               |
| 16 | 7.7E+07 | 7.7E+07 | KD2-H4K8la_peak_2360 | 7.60756  |                                                     |
| 16 | 7.7E+07 | 7.7E+07 | KD2-H4K8la_peak_2361 | 6.3399   | MON1B_ENSG00000103111                               |
| 16 | 7.7E+07 | 7.7E+07 | KD2-H4K8la_peak_2362 | 5.22084  |                                                     |
| 16 | 7.7E+07 | 7.7E+07 | KD2-H4K8la_peak_2363 | 8.07102  |                                                     |
| 16 | 8.2E+07 | 8.2E+07 | KD2-H4K8la_peak_2364 | 11.60966 |                                                     |
| 16 | 8.2E+07 | 8.2E+07 | KD2-H4K8la_peak_2365 | 7.61975  |                                                     |
| 16 | 8.2E+07 | 8.2E+07 | KD2-H4K8la_peak_2366 | 7.12497  |                                                     |
| 16 | 8.4E+07 | 8.4E+07 | KD2-H4K8la_peak_2367 | 6.71169  | RP11-483P21.2_ENSG00000260228;HSBP1_ENSG00000230989 |
| 16 | 8.5E+07 | 8.5E+07 | KD2-H4K8la_peak_2368 | 6.86458  | USP10_ENSG00000103194                               |
| 16 | 8.5E+07 | 8.5E+07 | KD2-H4K8la_peak_2369 | 5.83285  | ZDHHC7_ENSG00000153786                              |
| 16 | 8.5E+07 | 8.5E+07 | KD2-H4K8la_peak_2370 | 5.43278  |                                                     |
| 16 | 8.5E+07 | 8.5E+07 | KD2-H4K8la_peak_2371 | 5.58883  |                                                     |
| 16 | 8.5E+07 | 8.5E+07 | KD2-H4K8la_peak_2372 | 9.70817  |                                                     |
| 16 | 8.5E+07 | 8.5E+07 | KD2-H4K8la_peak_2373 | 9.18773  |                                                     |
| 16 | 8.5E+07 | 8.5E+07 | KD2-H4K8la_peak_2374 | 7.12014  |                                                     |
| 16 | 8.5E+07 | 8.5E+07 | KD2-H4K8la_peak_2375 | 8.37064  |                                                     |
| 16 | 8.5E+07 | 8.5E+07 | KD2-H4K8la_peak_2376 | 6.86458  |                                                     |
| 16 | 8.5E+07 | 8.5E+07 | KD2-H4K8la_peak_2377 | 5.27164  |                                                     |
| 16 | 8.5E+07 | 8.5E+07 | KD2-H4K8la_peak_2378 | 12.03112 |                                                     |
| 16 | 8.5E+07 | 8.5E+07 | KD2-H4K8la_peak_2379 | 4.75945  |                                                     |
| 16 | 8.5E+07 | 8.5E+07 | KD2-H4K8la_peak_2380 | 6.00056  |                                                     |
| 16 | 8.5E+07 | 8.5E+07 | KD2-H4K8la_peak_2381 | 7.92775  |                                                     |
| 16 | 8.5E+07 | 8.5E+07 | KD2-H4K8la_peak_2382 | 4.96993  |                                                     |
| 16 | 8.6E+07 | 8.6E+07 | KD2-H4K8la_peak_2383 | 6.64804  |                                                     |
| 16 | 8.6E+07 | 8.6E+07 | KD2-H4K8la_peak_2384 | 5.57469  |                                                     |
| 16 | 8.6E+07 | 8.6E+07 | KD2-H4K8la_peak_2385 | 8.37064  |                                                     |
| 16 | 8.6E+07 | 8.6E+07 | KD2-H4K8la_peak_2386 | 7.12014  |                                                     |
| 16 | 8.6E+07 | 8.6E+07 | KD2-H4K8la_peak_2387 | 12.32641 |                                                     |
| 16 | 8.7E+07 | 8.7E+07 | KD2-H4K8la_peak_2388 | 6.64804  | MTHFSD_ENSG00000103248                              |
| 16 | 8.7E+07 | 8.7E+07 | KD2-H4K8la_peak_2389 | 14.23294 | FBXO31_ENSG00000103264                              |
| 16 | 8.8E+07 | 8.8E+07 | KD2-H4K8la_peak_2390 | 10.49982 | RP11-482M8.1_ENSG00000260750                        |

|    |         |         |                      |          |                                                 |
|----|---------|---------|----------------------|----------|-------------------------------------------------|
| 16 | 8.8E+07 | 8.8E+07 | KD2-H4K8la_peak_2391 | 6.3399   |                                                 |
| 16 | 8.8E+07 | 8.8E+07 | KD2-H4K8la_peak_2392 | 10.70061 | KLHDC4_ENSG00000104731                          |
| 16 | 8.8E+07 | 8.8E+07 | KD2-H4K8la_peak_2393 | 11.20123 | RP4-536B24.4_ENSG00000260498                    |
| 16 | 8.8E+07 | 8.8E+07 | KD2-H4K8la_peak_2394 | 6.0136   |                                                 |
| 16 | 8.8E+07 | 8.8E+07 | KD2-H4K8la_peak_2395 | 7.61975  |                                                 |
| 16 | 8.8E+07 | 8.8E+07 | KD2-H4K8la_peak_2396 | 9.06396  |                                                 |
| 16 | 8.8E+07 | 8.8E+07 | KD2-H4K8la_peak_2397 | 7.53947  |                                                 |
| 16 | 8.8E+07 | 8.8E+07 | KD2-H4K8la_peak_2398 | 13.13367 |                                                 |
| 16 | 8.8E+07 | 8.8E+07 | KD2-H4K8la_peak_2399 | 9.73848  |                                                 |
| 16 | 8.8E+07 | 8.8E+07 | KD2-H4K8la_peak_2400 | 7.61975  | LA16c-444G7.1_ENSG00000261273                   |
| 16 | 8.8E+07 | 8.8E+07 | KD2-H4K8la_peak_2401 | 7.45205  | LA16c-444G7.1_ENSG00000261273                   |
| 16 | 8.8E+07 | 8.8E+07 | KD2-H4K8la_peak_2402 | 5.27164  |                                                 |
| 16 | 8.9E+07 | 8.9E+07 | KD2-H4K8la_peak_2403 | 7.19244  |                                                 |
| 16 | 8.9E+07 | 8.9E+07 | KD2-H4K8la_peak_2404 | 11.21258 |                                                 |
| 16 | 8.9E+07 | 8.9E+07 | KD2-H4K8la_peak_2405 | 6.96161  |                                                 |
| 16 | 8.9E+07 | 8.9E+07 | KD2-H4K8la_peak_2406 | 8.12466  | ZC3H18_ENSG00000158545                          |
| 16 | 8.9E+07 | 8.9E+07 | KD2-H4K8la_peak_2407 | 10.04111 | GALNS_ENSG00000141012;TRAPPC2L_ENSG00000167515  |
| 16 | 8.9E+07 | 8.9E+07 | KD2-H4K8la_peak_2408 | 18.73383 |                                                 |
| 16 | 8.9E+07 | 8.9E+07 | KD2-H4K8la_peak_2409 | 9.18773  |                                                 |
| 16 | 8.9E+07 | 8.9E+07 | KD2-H4K8la_peak_2410 | 14.30066 |                                                 |
| 16 | 9E+07   | 9E+07   | KD2-H4K8la_peak_2411 | 8.39919  | SPIRE2_ENSG00000204991;FANCA_ENSG00000187741    |
| 16 | 9E+07   | 9E+07   | KD2-H4K8la_peak_2412 | 4.86896  |                                                 |
| 16 | 9E+07   | 9E+07   | KD2-H4K8la_peak_2413 | 11.15747 | CENPBD1_ENSG00000177946;AFG3L1P_ENSG00000223959 |
| 16 | 9E+07   | 9E+07   | KD2-H4K8la_peak_2414 | 8.66164  | DBNDD1_ENSG0000003249;GAS8_ENSG00000141013      |
| 16 | 9E+07   | 9E+07   | KD2-H4K8la_peak_2415 | 6.86458  | URAHP_ENSG00000222019                           |
| 17 | 30330   | 30791   | KD2-H4K8la_peak_2416 | 6.48828  | DOC2B_ENSG00000272636                           |
| 17 | 259395  | 259675  | KD2-H4K8la_peak_2417 | 10.36292 | C17orf97_ENSG00000187624                        |
| 17 | 503548  | 503843  | KD2-H4K8la_peak_2418 | 5.83285  |                                                 |
| 17 | 635148  | 635428  | KD2-H4K8la_peak_2419 | 4.69635  | FAM57A_ENSG00000167695                          |
| 17 | 635846  | 636270  | KD2-H4K8la_peak_2420 | 7.09021  | FAM57A_ENSG00000167695                          |
| 17 | 636480  | 636677  | KD2-H4K8la_peak_2421 | 6.22999  | FAM57A_ENSG00000167695                          |
| 17 | 685187  | 685440  | KD2-H4K8la_peak_2422 | 6.96161  | RNMTL1_ENSG00000171861                          |
| 17 | 1057493 | 1057710 | KD2-H4K8la_peak_2423 | 9.10568  |                                                 |
| 17 | 1154970 | 1155212 | KD2-H4K8la_peak_2424 | 5.92398  |                                                 |
| 17 | 1302873 | 1303284 | KD2-H4K8la_peak_2425 | 13.86277 | YWHAE_ENSG00000108953                           |
| 17 | 1359060 | 1359412 | KD2-H4K8la_peak_2426 | 7.9397   |                                                 |
| 17 | 1478377 | 1478730 | KD2-H4K8la_peak_2427 | 5.52913  |                                                 |
| 17 | 1551858 | 1552117 | KD2-H4K8la_peak_2428 | 9.27415  |                                                 |
| 17 | 1587841 | 1588102 | KD2-H4K8la_peak_2429 | 7.12014  | PRPF8_ENSG00000174231                           |
| 17 | 1620035 | 1620334 | KD2-H4K8la_peak_2430 | 10.51221 | MIR22HG_ENSG00000186594;WDR81_ENSG00000167716   |
| 17 | 1627499 | 1627731 | KD2-H4K8la_peak_2431 | 8.47421  |                                                 |
| 17 | 1665429 | 1666342 | KD2-H4K8la_peak_2432 | 10.12872 | SERPINF1_ENSG00000132386                        |
| 17 | 1846226 | 1846440 | KD2-H4K8la_peak_2433 | 7.65547  |                                                 |
| 17 | 1978804 | 1979282 | KD2-H4K8la_peak_2434 | 7.61975  |                                                 |
| 17 | 2296771 | 2297015 | KD2-H4K8la_peak_2435 | 5.24027  |                                                 |
| 17 | 2614101 | 2614579 | KD2-H4K8la_peak_2436 | 4.53763  |                                                 |

|    |         |         |                      |          |                                                                                                              |
|----|---------|---------|----------------------|----------|--------------------------------------------------------------------------------------------------------------|
| 17 | 2615235 | 2615913 | KD2-H4K8la_peak_2437 | 10.20357 | CLUH_ENSG00000132361;RP11-74E22.3_ENSG00000262050                                                            |
| 17 | 2828921 | 2829249 | KD2-H4K8la_peak_2438 | 10.20357 |                                                                                                              |
| 17 | 2906755 | 2907260 | KD2-H4K8la_peak_2439 | 7.49467  |                                                                                                              |
| 17 | 3598078 | 3598404 | KD2-H4K8la_peak_2440 | 5.05146  |                                                                                                              |
| 17 | 3599524 | 3599723 | KD2-H4K8la_peak_2441 | 6.28277  | P2RX5-TAX1BP3_ENSG00000257950;P2RX5_ENSG00000083454                                                          |
| 17 | 3749047 | 3749367 | KD2-H4K8la_peak_2442 | 6.40658  | C17orf85_ENSG00000074356                                                                                     |
| 17 | 3796630 | 3797131 | KD2-H4K8la_peak_2443 | 8.24908  |                                                                                                              |
| 17 | 3848372 | 3848682 | KD2-H4K8la_peak_2444 | 13.5227  |                                                                                                              |
| 17 | 4045852 | 4046151 | KD2-H4K8la_peak_2445 | 5.90392  | ZZEF1_ENSG00000074755;CYB5D2_ENSG00000167740                                                                 |
| 17 | 4269073 | 4269274 | KD2-H4K8la_peak_2446 | 5.83285  | UBE2G1_ENSG00000132388                                                                                       |
| 17 | 4378645 | 4378956 | KD2-H4K8la_peak_2447 | 7.19298  |                                                                                                              |
| 17 | 4437368 | 4438119 | KD2-H4K8la_peak_2448 | 15.19386 |                                                                                                              |
| 17 | 4458973 | 4459478 | KD2-H4K8la_peak_2449 | 6.57426  | MYBBP1A_ENSG00000132382                                                                                      |
| 17 | 4607056 | 4607263 | KD2-H4K8la_peak_2450 | 5.58883  | PELPI_ENSG00000141456;RP11-314A20.2_ENSG00000244184                                                          |
| 17 | 4812653 | 4813109 | KD2-H4K8la_peak_2451 | 8.37064  |                                                                                                              |
| 17 | 4981356 | 4981573 | KD2-H4K8la_peak_2452 | 7.12014  | RP11-46I8.3_ENSG00000262693;ZFP3_ENSG00000180787                                                             |
| 17 | 5390402 | 5390675 | KD2-H4K8la_peak_2453 | 8.43222  | DERL2_ENSG00000072849;MIS12_ENSG00000167842                                                                  |
| 17 | 6346459 | 6346716 | KD2-H4K8la_peak_2454 | 11.20575 |                                                                                                              |
| 17 | 6358565 | 6358771 | KD2-H4K8la_peak_2455 | 6.13507  |                                                                                                              |
| 17 | 6555175 | 6555651 | KD2-H4K8la_peak_2456 | 6.2278   | MED31_ENSG00000108590;C17orf100_ENSG00000212734;AC004706.1_ENSG00000256806                                   |
| 17 | 6922476 | 6922913 | KD2-H4K8la_peak_2457 | 6.95378  | RP11-589P10.7_ENSG00000267047;MIR497HG_ENSG00000267532                                                       |
| 17 | 6923630 | 6923832 | KD2-H4K8la_peak_2458 | 7.12014  | RP11-589P10.7_ENSG00000267047;MIR497HG_ENSG00000267532                                                       |
| 17 | 6939357 | 6939779 | KD2-H4K8la_peak_2459 | 5.84082  | SLC16A13_ENSG00000174327                                                                                     |
| 17 | 7142100 | 7142665 | KD2-H4K8la_peak_2460 | 8.43222  | PHF23_ENSG00000040633                                                                                        |
| 17 | 7154568 | 7155285 | KD2-H4K8la_peak_2461 | 13.6415  | CTDNBP1_ENSG00000175826;ELP5_ENSG00000170291                                                                 |
| 17 | 7155986 | 7156205 | KD2-H4K8la_peak_2462 | 4.75945  | CTDNBP1_ENSG00000175826                                                                                      |
| 17 | 7209530 | 7209993 | KD2-H4K8la_peak_2463 | 8.43222  | EIF5A_ENSG00000132507                                                                                        |
| 17 | 7211566 | 7211810 | KD2-H4K8la_peak_2464 | 6.61963  |                                                                                                              |
| 17 | 7218227 | 7218475 | KD2-H4K8la_peak_2465 | 9.20163  | GPS2_ENSG00000132522                                                                                         |
| 17 | 7233548 | 7234333 | KD2-H4K8la_peak_2466 | 8.76116  | NEURL4_ENSG00000215041;AC026954.6_ENSG00000224647                                                            |
| 17 | 7284527 | 7284735 | KD2-H4K8la_peak_2467 | 4.53273  | TNK1_ENSG00000174292                                                                                         |
| 17 | 7287648 | 7287977 | KD2-H4K8la_peak_2468 | 6.86458  |                                                                                                              |
| 17 | 7308283 | 7308533 | KD2-H4K8la_peak_2469 | 6.88801  | TMEM256-PLSCR3_ENSG00000187838;C17orf61-PLSCR3_ENSG00000262481;TMEM256_ENSG00000205544;NLGN2_ENSG00000169992 |
| 17 | 7359926 | 7360154 | KD2-H4K8la_peak_2470 | 8.12466  |                                                                                                              |
| 17 | 7382519 | 7382906 | KD2-H4K8la_peak_2471 | 7.30722  |                                                                                                              |
| 17 | 7383106 | 7383444 | KD2-H4K8la_peak_2472 | 5.58883  |                                                                                                              |
| 17 | 7452457 | 7452754 | KD2-H4K8la_peak_2473 | 9.27415  | TNFSF12_ENSG00000239697;TNFSF12-TNFSF13_ENSG00000248871                                                      |
| 17 | 7476261 | 7476780 | KD2-H4K8la_peak_2474 | 9.9149   | EIF4A1_ENSG00000161960;SNORA67_ENSG00000264772                                                               |
| 17 | 7486341 | 7486915 | KD2-H4K8la_peak_2475 | 10.28981 | AC113189.5_ENSG00000233223;MPDU1_ENSG00000129255                                                             |
| 17 | 7788294 | 7788524 | KD2-H4K8la_peak_2476 | 9.27415  | LSMD1_ENSG00000183011;CHD3_ENSG00000170004                                                                   |
| 17 | 7819486 | 7819982 | KD2-H4K8la_peak_2477 | 5.43278  | AC025335.1_ENSG00000179859                                                                                   |
| 17 | 7982947 | 7983228 | KD2-H4K8la_peak_2478 | 6.47589  | AC129492.6_ENSG00000214999                                                                                   |
| 17 | 8066675 | 8067075 | KD2-H4K8la_peak_2479 | 9.35473  | RP11-599B13.6_ENSG00000263620;VAMP2_ENSG00000220205                                                          |
| 17 | 8095901 | 8096164 | KD2-H4K8la_peak_2480 | 8.8293   |                                                                                                              |
| 17 | 8103828 | 8104230 | KD2-H4K8la_peak_2481 | 5.78071  |                                                                                                              |
| 17 | 8113457 | 8113681 | KD2-H4K8la_peak_2482 | 6.89612  | AURKB_ENSG00000178999                                                                                        |

|    |         |         |                      |          |                                                     |
|----|---------|---------|----------------------|----------|-----------------------------------------------------|
| 17 | 8250466 | 8250812 | KD2-H4K8la_peak_2483 | 6.2278   |                                                     |
| 17 | 1.2E+07 | 1.2E+07 | KD2-H4K8la_peak_2484 | 10.04111 | ZNF18_ENSG00000154957                               |
| 17 | 1.2E+07 | 1.2E+07 | KD2-H4K8la_peak_2485 | 7.30722  | RPL21P122_ENSG00000241185;MAP2K4_ENSG00000065559    |
| 17 | 1.5E+07 | 1.5E+07 | KD2-H4K8la_peak_2486 | 6.3399   |                                                     |
| 17 | 1.6E+07 | 1.6E+07 | KD2-H4K8la_peak_2487 | 6.64804  | TRIM16_ENSG00000221926                              |
| 17 | 1.6E+07 | 1.6E+07 | KD2-H4K8la_peak_2488 | 9.86881  | MEIS3P1_ENSG00000179277                             |
| 17 | 1.6E+07 | 1.6E+07 | KD2-H4K8la_peak_2489 | 8.37064  | MEIS3P1_ENSG00000179277                             |
| 17 | 1.6E+07 | 1.6E+07 | KD2-H4K8la_peak_2490 | 11.77509 | ADORA2B_ENSG00000170425                             |
| 17 | 1.6E+07 | 1.6E+07 | KD2-H4K8la_peak_2491 | 6.25288  | ADORA2B_ENSG00000170425                             |
| 17 | 1.6E+07 | 1.6E+07 | KD2-H4K8la_peak_2492 | 8.16787  |                                                     |
| 17 | 1.6E+07 | 1.6E+07 | KD2-H4K8la_peak_2493 | 9.70817  | UBB_ENSG00000170315                                 |
| 17 | 1.6E+07 | 1.6E+07 | KD2-H4K8la_peak_2494 | 7.96951  |                                                     |
| 17 | 1.7E+07 | 1.7E+07 | KD2-H4K8la_peak_2495 | 9.05604  | ZNF624_ENSG00000197566;RP11-92B11.4_ENSG00000264765 |
| 17 | 1.7E+07 | 1.7E+07 | KD2-H4K8la_peak_2496 | 7.92775  |                                                     |
| 17 | 1.7E+07 | 1.7E+07 | KD2-H4K8la_peak_2497 | 10.90862 |                                                     |
| 17 | 1.7E+07 | 1.7E+07 | KD2-H4K8la_peak_2498 | 5.36015  |                                                     |
| 17 | 1.7E+07 | 1.7E+07 | KD2-H4K8la_peak_2499 | 15.75402 | MED9_ENSG00000141026                                |
| 17 | 1.8E+07 | 1.8E+07 | KD2-H4K8la_peak_2500 | 7.30722  | RAI1_ENSG00000108557                                |
| 17 | 1.8E+07 | 1.8E+07 | KD2-H4K8la_peak_2501 | 13.89769 | RAI1_ENSG00000108557                                |
| 17 | 1.8E+07 | 1.8E+07 | KD2-H4K8la_peak_2502 | 10.46101 |                                                     |
| 17 | 1.8E+07 | 1.8E+07 | KD2-H4K8la_peak_2503 | 6.85638  |                                                     |
| 17 | 1.8E+07 | 1.8E+07 | KD2-H4K8la_peak_2504 | 7.3993   |                                                     |
| 17 | 1.8E+07 | 1.8E+07 | KD2-H4K8la_peak_2505 | 12.32641 |                                                     |
| 17 | 1.8E+07 | 1.8E+07 | KD2-H4K8la_peak_2506 | 10.61716 |                                                     |
| 17 | 1.8E+07 | 1.8E+07 | KD2-H4K8la_peak_2507 | 6.61576  | SREBF1_ENSG00000072310                              |
| 17 | 1.8E+07 | 1.8E+07 | KD2-H4K8la_peak_2508 | 6.3399   | DRG2_ENSG00000108591                                |
| 17 | 1.8E+07 | 1.8E+07 | KD2-H4K8la_peak_2509 | 8.76116  | DRG2_ENSG00000108591                                |
| 17 | 1.8E+07 | 1.8E+07 | KD2-H4K8la_peak_2510 | 5.98775  |                                                     |
| 17 | 1.8E+07 | 1.8E+07 | KD2-H4K8la_peak_2511 | 6.86458  | TOP3A_ENSG00000177302;SMCR8_ENSG00000176994         |
| 17 | 1.8E+07 | 1.8E+07 | KD2-H4K8la_peak_2512 | 5.83285  | RP1-37N7.3_ENSG00000220161                          |
| 17 | 1.9E+07 | 1.9E+07 | KD2-H4K8la_peak_2513 | 10.28981 | TRIM16L_ENSG00000108448                             |
| 17 | 1.9E+07 | 1.9E+07 | KD2-H4K8la_peak_2514 | 5.7631   | RNF112_ENSG00000128482                              |
| 17 | 1.9E+07 | 1.9E+07 | KD2-H4K8la_peak_2515 | 7.92775  | AC025627.7_ENSG00000228983                          |
| 17 | 2E+07   | 2E+07   | KD2-H4K8la_peak_2516 | 6.71169  | ALDH3A2_ENSG00000072210                             |
| 17 | 2E+07   | 2E+07   | KD2-H4K8la_peak_2517 | 12.13455 |                                                     |
| 17 | 2E+07   | 2E+07   | KD2-H4K8la_peak_2518 | 7.61975  | ULK2_ENSG00000083290                                |
| 17 | 2E+07   | 2E+07   | KD2-H4K8la_peak_2519 | 7.19244  | ULK2_ENSG00000083290                                |
| 17 | 2E+07   | 2E+07   | KD2-H4K8la_peak_2520 | 5.33512  |                                                     |
| 17 | 2E+07   | 2E+07   | KD2-H4K8la_peak_2521 | 8.39919  | AKAP10_ENSG00000108599                              |
| 17 | 2E+07   | 2E+07   | KD2-H4K8la_peak_2522 | 9.55729  | AKAP10_ENSG00000108599                              |
| 17 | 2.1E+07 | 2.1E+07 | KD2-H4K8la_peak_2523 | 9.86881  |                                                     |
| 17 | 2.1E+07 | 2.1E+07 | KD2-H4K8la_peak_2524 | 11.28887 | USP22_ENSG00000124422                               |
| 17 | 2.1E+07 | 2.1E+07 | KD2-H4K8la_peak_2525 | 5.83285  | TMEM11_ENSG00000178307;AC087294.2_ENSG00000235530   |
| 17 | 2.6E+07 | 2.6E+07 | KD2-H4K8la_peak_2526 | 8.76116  | RP11-173M1.5_ENSG00000265683                        |
| 17 | 2.7E+07 | 2.7E+07 | KD2-H4K8la_peak_2527 | 4.66473  |                                                     |
| 17 | 2.7E+07 | 2.7E+07 | KD2-H4K8la_peak_2528 | 7.48323  | IFT20_ENSG00000109083;TNFAIP1_ENSG00000109079       |

|    |         |         |                      |          |                                                                       |
|----|---------|---------|----------------------|----------|-----------------------------------------------------------------------|
| 17 | 2.7E+07 | 2.7E+07 | KD2-H4K8la_peak_2529 | 5.05146  | VTN_ENSG00000109072                                                   |
| 17 | 2.7E+07 | 2.7E+07 | KD2-H4K8la_peak_2530 | 12.39776 | FAM222B_ENSG00000173065;ERAL1_ENSG00000132591                         |
| 17 | 2.7E+07 | 2.7E+07 | KD2-H4K8la_peak_2531 | 9.45339  | FAM222B_ENSG00000173065;ERAL1_ENSG00000132591                         |
| 17 | 2.7E+07 | 2.7E+07 | KD2-H4K8la_peak_2532 | 4.81796  | FLOT2_ENSG00000132589;RP11-20B24.4_ENSG00000266642                    |
| 17 | 2.7E+07 | 2.7E+07 | KD2-H4K8la_peak_2533 | 5.86121  |                                                                       |
| 17 | 2.7E+07 | 2.7E+07 | KD2-H4K8la_peak_2534 | 5.67034  |                                                                       |
| 17 | 2.7E+07 | 2.7E+07 | KD2-H4K8la_peak_2535 | 8.8293   |                                                                       |
| 17 | 2.8E+07 | 2.8E+07 | KD2-H4K8la_peak_2536 | 5.05146  | MYO18A_ENSG00000196535                                                |
| 17 | 2.8E+07 | 2.8E+07 | KD2-H4K8la_peak_2537 | 11.06859 | MIR4523_ENSG00000264808;TAOK1_ENSG00000160551;MIR4523_ENSG00000263719 |
| 17 | 2.8E+07 | 2.8E+07 | KD2-H4K8la_peak_2538 | 5.21483  |                                                                       |
| 17 | 2.9E+07 | 2.9E+07 | KD2-H4K8la_peak_2539 | 9.20163  | BLMH_ENSG00000108578                                                  |
| 17 | 2.9E+07 | 2.9E+07 | KD2-H4K8la_peak_2540 | 11.06859 |                                                                       |
| 17 | 3E+07   | 3E+07   | KD2-H4K8la_peak_2541 | 6.86458  | RAB11FIP4_ENSG00000131242                                             |
| 17 | 3E+07   | 3E+07   | KD2-H4K8la_peak_2542 | 7.49467  |                                                                       |
| 17 | 3E+07   | 3E+07   | KD2-H4K8la_peak_2543 | 12.32641 | MIR193A_ENSG00000207614                                               |
| 17 | 3E+07   | 3E+07   | KD2-H4K8la_peak_2544 | 23.77242 | RP11-640N20.6_ENSG00000264164                                         |
| 17 | 3.1E+07 | 3.1E+07 | KD2-H4K8la_peak_2545 | 5.58883  | PSMD11_ENSG00000108671                                                |
| 17 | 3.1E+07 | 3.1E+07 | KD2-H4K8la_peak_2546 | 8.07044  | RP11-466A19.6_ENSG00000263717;RP11-466A19.3_ENSG00000266599           |
| 17 | 3.1E+07 | 3.1E+07 | KD2-H4K8la_peak_2547 | 7.72421  |                                                                       |
| 17 | 3.3E+07 | 3.3E+07 | KD2-H4K8la_peak_2548 | 5.36015  | ZNF830_ENSG00000198783                                                |
| 17 | 3.3E+07 | 3.3E+07 | KD2-H4K8la_peak_2549 | 5.43278  | LIG3_ENSG00000005156;CCT6B_ENSG00000132141                            |
| 17 | 3.4E+07 | 3.4E+07 | KD2-H4K8la_peak_2550 | 9.72904  | RP11-1094M14.1_ENSG00000242660;RP11-1094M14.11_ENSG00000267321        |
| 17 | 3.4E+07 | 3.4E+07 | KD2-H4K8la_peak_2551 | 10.04111 |                                                                       |
| 17 | 3.5E+07 | 3.5E+07 | KD2-H4K8la_peak_2552 | 4.75945  | PIGW_ENSG00000184886                                                  |
| 17 | 3.5E+07 | 3.5E+07 | KD2-H4K8la_peak_2553 | 7.12014  |                                                                       |
| 17 | 3.5E+07 | 3.5E+07 | KD2-H4K8la_peak_2554 | 7.3993   |                                                                       |
| 17 | 3.5E+07 | 3.5E+07 | KD2-H4K8la_peak_2555 | 6.64804  |                                                                       |
| 17 | 3.6E+07 | 3.6E+07 | KD2-H4K8la_peak_2556 | 8.07044  |                                                                       |
| 17 | 3.7E+07 | 3.7E+07 | KD2-H4K8la_peak_2557 | 7.83588  |                                                                       |
| 17 | 3.7E+07 | 3.7E+07 | KD2-H4K8la_peak_2558 | 10.31941 |                                                                       |
| 17 | 3.7E+07 | 3.7E+07 | KD2-H4K8la_peak_2559 | 5.56351  | SRCIN1_ENSG00000017373                                                |
| 17 | 3.7E+07 | 3.7E+07 | KD2-H4K8la_peak_2560 | 6.3399   | SRCIN1_ENSG00000017373                                                |
| 17 | 3.7E+07 | 3.7E+07 | KD2-H4K8la_peak_2561 | 7.51014  |                                                                       |
| 17 | 3.7E+07 | 3.7E+07 | KD2-H4K8la_peak_2562 | 6.71169  | MLLT6_ENSG00000108292                                                 |
| 17 | 3.7E+07 | 3.7E+07 | KD2-H4K8la_peak_2563 | 8.37064  |                                                                       |
| 17 | 3.7E+07 | 3.7E+07 | KD2-H4K8la_peak_2564 | 10.21747 | PCGF2_ENSG00000056661;CTB-58E17.5_ENSG00000227450                     |
| 17 | 3.7E+07 | 3.7E+07 | KD2-H4K8la_peak_2565 | 6.64804  | RPL23_ENSG00000125691;RPS20P35_ENSG00000244086                        |
| 17 | 3.7E+07 | 3.7E+07 | KD2-H4K8la_peak_2566 | 4.53273  |                                                                       |
| 17 | 3.8E+07 | 3.8E+07 | KD2-H4K8la_peak_2567 | 6.2624   | MED1_ENSG00000125686                                                  |
| 17 | 3.8E+07 | 3.8E+07 | KD2-H4K8la_peak_2568 | 9.0413   |                                                                       |
| 17 | 3.8E+07 | 3.8E+07 | KD2-H4K8la_peak_2569 | 10.20357 | AC087491.2_ENSG00000214546                                            |
| 17 | 3.8E+07 | 3.8E+07 | KD2-H4K8la_peak_2570 | 7.3993   | PNMT_ENSG00000141744                                                  |
| 17 | 3.8E+07 | 3.8E+07 | KD2-H4K8la_peak_2571 | 11.40266 |                                                                       |
| 17 | 3.8E+07 | 3.8E+07 | KD2-H4K8la_peak_2572 | 9.37576  |                                                                       |
| 17 | 3.8E+07 | 3.8E+07 | KD2-H4K8la_peak_2573 | 8.76116  | ORMDL3_ENSG00000172057;RP11-387H17.4_ENSG00000264968                  |
| 17 | 3.8E+07 | 3.8E+07 | KD2-H4K8la_peak_2574 | 7.22716  |                                                                       |



|    |         |         |                      |          |                                                     |
|----|---------|---------|----------------------|----------|-----------------------------------------------------|
| 17 | 3.8E+07 | 3.8E+07 | KD2-H4K8la_peak_2575 | 9.11321  |                                                     |
| 17 | 3.8E+07 | 3.8E+07 | KD2-H4K8la_peak_2576 | 6.11881  |                                                     |
| 17 | 3.8E+07 | 3.8E+07 | KD2-H4K8la_peak_2577 | 7.01227  |                                                     |
| 17 | 3.8E+07 | 3.8E+07 | KD2-H4K8la_peak_2578 | 7.01227  |                                                     |
| 17 | 3.9E+07 | 3.9E+07 | KD2-H4K8la_peak_2579 | 8.26997  |                                                     |
| 17 | 3.9E+07 | 3.9E+07 | KD2-H4K8la_peak_2580 | 6.3399   | IGFBP4_ENSG00000141753                              |
| 17 | 3.9E+07 | 3.9E+07 | KD2-H4K8la_peak_2581 | 12.65402 |                                                     |
| 17 | 3.9E+07 | 3.9E+07 | KD2-H4K8la_peak_2582 | 6.3399   |                                                     |
| 17 | 3.9E+07 | 3.9E+07 | KD2-H4K8la_peak_2583 | 6.17271  |                                                     |
| 17 | 3.9E+07 | 3.9E+07 | KD2-H4K8la_peak_2584 | 11.7374  |                                                     |
| 17 | 3.9E+07 | 3.9E+07 | KD2-H4K8la_peak_2585 | 7.61975  |                                                     |
| 17 | 3.9E+07 | 3.9E+07 | KD2-H4K8la_peak_2586 | 10.21747 |                                                     |
| 17 | 3.9E+07 | 3.9E+07 | KD2-H4K8la_peak_2587 | 7.19244  |                                                     |
| 17 | 3.9E+07 | 3.9E+07 | KD2-H4K8la_peak_2588 | 6.56022  |                                                     |
| 17 | 3.9E+07 | 3.9E+07 | KD2-H4K8la_peak_2589 | 12.92898 |                                                     |
| 17 | 4E+07   | 4E+07   | KD2-H4K8la_peak_2590 | 6.16656  |                                                     |
| 17 | 4E+07   | 4E+07   | KD2-H4K8la_peak_2591 | 10.90862 |                                                     |
| 17 | 4E+07   | 4E+07   | KD2-H4K8la_peak_2592 | 7.49467  |                                                     |
| 17 | 4E+07   | 4E+07   | KD2-H4K8la_peak_2593 | 5.58883  |                                                     |
| 17 | 4E+07   | 4E+07   | KD2-H4K8la_peak_2594 | 5.7631   | STAT5B_ENSG00000173757                              |
| 17 | 4E+07   | 4E+07   | KD2-H4K8la_peak_2595 | 8.84474  | STAT5B_ENSG00000173757                              |
| 17 | 4.1E+07 | 4.1E+07 | KD2-H4K8la_peak_2596 | 5.67596  | RP11-400F19.6_ENSG00000266962                       |
| 17 | 4.1E+07 | 4.1E+07 | KD2-H4K8la_peak_2597 | 6.40658  | COASY_ENSG00000068120                               |
| 17 | 4.1E+07 | 4.1E+07 | KD2-H4K8la_peak_2598 | 8.59561  | COASY_ENSG00000068120                               |
| 17 | 4.1E+07 | 4.1E+07 | KD2-H4K8la_peak_2599 | 6.3399   |                                                     |
| 17 | 4.1E+07 | 4.1E+07 | KD2-H4K8la_peak_2600 | 13.27013 | CTD-3193K9.4_ENSG00000267042                        |
| 17 | 4.1E+07 | 4.1E+07 | KD2-H4K8la_peak_2601 | 6.86458  | RAMP2-AS1_ENSG00000197291                           |
| 17 | 4.1E+07 | 4.1E+07 | KD2-H4K8la_peak_2602 | 9.73848  | Y_RNA_ENSG00000200127;RPL27_ENSG00000131469         |
| 17 | 4.1E+07 | 4.1E+07 | KD2-H4K8la_peak_2603 | 9.38376  |                                                     |
| 17 | 4.1E+07 | 4.1E+07 | KD2-H4K8la_peak_2604 | 7.47988  |                                                     |
| 17 | 4.2E+07 | 4.2E+07 | KD2-H4K8la_peak_2605 | 9.27415  | DHX8_ENSG00000067596                                |
| 17 | 4.2E+07 | 4.2E+07 | KD2-H4K8la_peak_2606 | 8.37064  | RP11-392O1.4_ENSG00000267747                        |
| 17 | 4.2E+07 | 4.2E+07 | KD2-H4K8la_peak_2607 | 10.49169 |                                                     |
| 17 | 4.2E+07 | 4.2E+07 | KD2-H4K8la_peak_2608 | 8.73956  |                                                     |
| 17 | 4.2E+07 | 4.2E+07 | KD2-H4K8la_peak_2609 | 12.13455 | RP11-209M4.1_ENSG00000267253                        |
| 17 | 4.2E+07 | 4.2E+07 | KD2-H4K8la_peak_2610 | 9.27415  | DUSP3_ENSG00000108861                               |
| 17 | 4.2E+07 | 4.2E+07 | KD2-H4K8la_peak_2611 | 13.13367 | RP11-527L4.2_ENSG00000261514                        |
| 17 | 4.2E+07 | 4.2E+07 | KD2-H4K8la_peak_2612 | 6.66491  |                                                     |
| 17 | 4.2E+07 | 4.2E+07 | KD2-H4K8la_peak_2613 | 10.27876 |                                                     |
| 17 | 4.2E+07 | 4.2E+07 | KD2-H4K8la_peak_2614 | 11.7362  |                                                     |
| 17 | 4.2E+07 | 4.2E+07 | KD2-H4K8la_peak_2615 | 8.39919  |                                                     |
| 17 | 4.2E+07 | 4.2E+07 | KD2-H4K8la_peak_2616 | 7.49467  | C17orf53_ENSG00000125319                            |
| 17 | 4.2E+07 | 4.2E+07 | KD2-H4K8la_peak_2617 | 6.64804  | ASB16-AS1_ENSG00000267080;TMUB2_ENSG00000168591     |
| 17 | 4.2E+07 | 4.2E+07 | KD2-H4K8la_peak_2618 | 5.9366   | ATXN7L3_ENSG00000087152;CTB-175E5.7_ENSG00000267394 |
| 17 | 4.2E+07 | 4.2E+07 | KD2-H4K8la_peak_2619 | 8.76116  | ATXN7L3_ENSG00000087152                             |
| 17 | 4.2E+07 | 4.2E+07 | KD2-H4K8la_peak_2620 | 8.43222  |                                                     |

|    |         |         |                      |          |                                                       |
|----|---------|---------|----------------------|----------|-------------------------------------------------------|
| 17 | 4.2E+07 | 4.2E+07 | KD2-H4K8la_peak_2621 | 5.7631   | GRN_ENSG00000030582                                   |
| 17 | 4.2E+07 | 4.2E+07 | KD2-H4K8la_peak_2622 | 7.56395  |                                                       |
| 17 | 4.3E+07 | 4.3E+07 | KD2-H4K8la_peak_2623 | 6.2278   | GPATCH8_ENSG00000186566                               |
| 17 | 4.3E+07 | 4.3E+07 | KD2-H4K8la_peak_2624 | 7.52934  | GPATCH8_ENSG00000186566                               |
| 17 | 4.3E+07 | 4.3E+07 | KD2-H4K8la_peak_2625 | 8.76116  |                                                       |
| 17 | 4.3E+07 | 4.3E+07 | KD2-H4K8la_peak_2626 | 9.98668  |                                                       |
| 17 | 4.3E+07 | 4.3E+07 | KD2-H4K8la_peak_2627 | 7.30722  | ADAM11_ENSG00000073670                                |
| 17 | 4.3E+07 | 4.3E+07 | KD2-H4K8la_peak_2628 | 5.05146  | ADAM11_ENSG00000073670                                |
| 17 | 4.3E+07 | 4.3E+07 | KD2-H4K8la_peak_2629 | 5.43278  | GJC1_ENSG00000182963                                  |
| 17 | 4.3E+07 | 4.3E+07 | KD2-H4K8la_peak_2630 | 14.26267 |                                                       |
| 17 | 4.3E+07 | 4.3E+07 | KD2-H4K8la_peak_2631 | 8.13557  |                                                       |
| 17 | 4.3E+07 | 4.3E+07 | KD2-H4K8la_peak_2632 | 7.51014  |                                                       |
| 17 | 4.3E+07 | 4.3E+07 | KD2-H4K8la_peak_2633 | 4.59516  | HEXIM1_ENSG00000186834                                |
| 17 | 4.3E+07 | 4.3E+07 | KD2-H4K8la_peak_2634 | 7.94013  |                                                       |
| 17 | 4.3E+07 | 4.3E+07 | KD2-H4K8la_peak_2635 | 7.01227  |                                                       |
| 17 | 4.4E+07 | 4.4E+07 | KD2-H4K8la_peak_2636 | 6.3399   |                                                       |
| 17 | 4.4E+07 | 4.4E+07 | KD2-H4K8la_peak_2637 | 10.48625 | DND1P1_ENSG00000264070                                |
| 17 | 4.4E+07 | 4.4E+07 | KD2-H4K8la_peak_2638 | 6.4136   | DND1P1_ENSG00000264070                                |
| 17 | 4.4E+07 | 4.4E+07 | KD2-H4K8la_peak_2639 | 16.21274 | MAPT_ENSG00000186868                                  |
| 17 | 4.4E+07 | 4.4E+07 | KD2-H4K8la_peak_2640 | 7.49467  | RP11-259G18.1_ENSG00000261575                         |
| 17 | 4.5E+07 | 4.5E+07 | KD2-H4K8la_peak_2641 | 17.3629  |                                                       |
| 17 | 4.5E+07 | 4.5E+07 | KD2-H4K8la_peak_2642 | 12.62032 |                                                       |
| 17 | 4.5E+07 | 4.5E+07 | KD2-H4K8la_peak_2643 | 10.9753  | RP11-156P1.3_ENSG00000262879                          |
| 17 | 4.5E+07 | 4.5E+07 | KD2-H4K8la_peak_2644 | 11.24937 | RP11-290H9.4_ENSG00000263293;EFCAB13_ENSG00000178852  |
| 17 | 4.6E+07 | 4.6E+07 | KD2-H4K8la_peak_2645 | 5.43278  |                                                       |
| 17 | 4.6E+07 | 4.6E+07 | KD2-H4K8la_peak_2646 | 7.59044  | LRRC46_ENSG00000141294;MRPL10_ENSG00000159111         |
| 17 | 4.6E+07 | 4.6E+07 | KD2-H4K8la_peak_2647 | 8.24671  | SCRN2_ENSG00000141295                                 |
| 17 | 4.6E+07 | 4.6E+07 | KD2-H4K8la_peak_2648 | 5.90392  | RP11-6N17.4_ENSG00000264920;SP2_ENSG00000167182       |
| 17 | 4.6E+07 | 4.6E+07 | KD2-H4K8la_peak_2649 | 11.20341 | AC003665.1_ENSG00000234494;PNPO_ENSG00000108439       |
| 17 | 4.6E+07 | 4.6E+07 | KD2-H4K8la_peak_2650 | 8.1293   |                                                       |
| 17 | 4.6E+07 | 4.6E+07 | KD2-H4K8la_peak_2651 | 7.75076  |                                                       |
| 17 | 4.6E+07 | 4.6E+07 | KD2-H4K8la_peak_2652 | 14.75465 |                                                       |
| 17 | 4.6E+07 | 4.6E+07 | KD2-H4K8la_peak_2653 | 17.48572 |                                                       |
| 17 | 4.6E+07 | 4.6E+07 | KD2-H4K8la_peak_2654 | 5.22418  |                                                       |
| 17 | 4.6E+07 | 4.6E+07 | KD2-H4K8la_peak_2655 | 6.56022  |                                                       |
| 17 | 4.6E+07 | 4.6E+07 | KD2-H4K8la_peak_2656 | 13.5227  |                                                       |
| 17 | 4.6E+07 | 4.6E+07 | KD2-H4K8la_peak_2657 | 9.06396  | COPZ2_ENSG00000005243;MIR152_ENSG00000207947          |
| 17 | 4.6E+07 | 4.6E+07 | KD2-H4K8la_peak_2658 | 4.67224  | RP5-890E16.2_ENSG00000263412;NFE2L1_ENSG000000082641  |
| 17 | 4.6E+07 | 4.6E+07 | KD2-H4K8la_peak_2659 | 6.86458  | RP5-890E16.2_ENSG00000263412;NFE2L1_ENSG000000082641  |
| 17 | 4.7E+07 | 4.7E+07 | KD2-H4K8la_peak_2660 | 9.0516   | ATP5G1_ENSG00000159199                                |
| 17 | 4.7E+07 | 4.7E+07 | KD2-H4K8la_peak_2661 | 11.40266 | SNF8_ENSG00000159210                                  |
| 17 | 4.7E+07 | 4.7E+07 | KD2-H4K8la_peak_2662 | 9.67249  | ZNF652_ENSG00000198740;RP11-1079K10.3_ENSG00000248714 |
| 17 | 4.8E+07 | 4.8E+07 | KD2-H4K8la_peak_2663 | 6.20477  |                                                       |
| 17 | 4.8E+07 | 4.8E+07 | KD2-H4K8la_peak_2664 | 5.23773  | RP11-613C6.2_ENSG00000250751                          |
| 17 | 4.8E+07 | 4.8E+07 | KD2-H4K8la_peak_2665 | 8.7731   | DLX4_ENSG00000108813                                  |
| 17 | 4.8E+07 | 4.8E+07 | KD2-H4K8la_peak_2666 | 6.68593  |                                                       |

|    |         |         |                      |          |                                                           |
|----|---------|---------|----------------------|----------|-----------------------------------------------------------|
| 17 | 4.8E+07 | 4.8E+07 | KD2-H4K8la_peak_2667 | 8.26997  |                                                           |
| 17 | 4.8E+07 | 4.8E+07 | KD2-H4K8la_peak_2668 | 5.23773  | RP11-893F2.13_ENSG00000253730                             |
| 17 | 4.8E+07 | 4.8E+07 | KD2-H4K8la_peak_2669 | 9.31176  |                                                           |
| 17 | 4.8E+07 | 4.8E+07 | KD2-H4K8la_peak_2670 | 9.78176  | RP11-893F2.5_ENSG00000249406                              |
| 17 | 4.8E+07 | 4.8E+07 | KD2-H4K8la_peak_2671 | 14.5688  | RP11-893F2.5_ENSG00000249406                              |
| 17 | 4.9E+07 | 4.9E+07 | KD2-H4K8la_peak_2672 | 9.5329   | ACSF2_ENSG00000167107                                     |
| 17 | 4.9E+07 | 4.9E+07 | KD2-H4K8la_peak_2673 | 7.23932  | RSAD1_ENSG00000136444                                     |
| 17 | 4.9E+07 | 4.9E+07 | KD2-H4K8la_peak_2674 | 11.05666 | RP11-94C24.6_ENSG00000249451;MYCBPAP_ENSG00000136449      |
| 17 | 4.9E+07 | 4.9E+07 | KD2-H4K8la_peak_2675 | 7.33892  | RP11-94C24.6_ENSG00000249451;MYCBPAP_ENSG00000136449      |
| 17 | 4.9E+07 | 4.9E+07 | KD2-H4K8la_peak_2676 | 13.89767 |                                                           |
| 17 | 4.9E+07 | 4.9E+07 | KD2-H4K8la_peak_2677 | 6.68593  | ANKRD40_ENSG00000154945                                   |
| 17 | 4.9E+07 | 4.9E+07 | KD2-H4K8la_peak_2678 | 10.90862 |                                                           |
| 17 | 4.9E+07 | 4.9E+07 | KD2-H4K8la_peak_2679 | 13.27915 |                                                           |
| 17 | 4.9E+07 | 4.9E+07 | KD2-H4K8la_peak_2680 | 9.03222  |                                                           |
| 17 | 4.9E+07 | 4.9E+07 | KD2-H4K8la_peak_2681 | 7.79412  |                                                           |
| 17 | 4.9E+07 | 4.9E+07 | KD2-H4K8la_peak_2682 | 14.22324 | RP11-700H6.1_ENSG00000247011;RP11-700H6.2_ENSG00000251665 |
| 17 | 4.9E+07 | 4.9E+07 | KD2-H4K8la_peak_2683 | 11.20341 |                                                           |
| 17 | 4.9E+07 | 4.9E+07 | KD2-H4K8la_peak_2684 | 10.49982 | SPAG9_ENSG00000008294                                     |
| 17 | 4.9E+07 | 4.9E+07 | KD2-H4K8la_peak_2685 | 9.78176  |                                                           |
| 17 | 4.9E+07 | 4.9E+07 | KD2-H4K8la_peak_2686 | 13.62642 | MBTD1_ENSG00000011258;UTP18_ENSG00000011260               |
| 17 | 5.4E+07 | 5.4E+07 | KD2-H4K8la_peak_2687 | 9.9701   |                                                           |
| 17 | 5.5E+07 | 5.5E+07 | KD2-H4K8la_peak_2688 | 9.66714  | TRIM25_ENSG00000121060                                    |
| 17 | 5.5E+07 | 5.5E+07 | KD2-H4K8la_peak_2689 | 5.84082  |                                                           |
| 17 | 5.5E+07 | 5.5E+07 | KD2-H4K8la_peak_2690 | 8.39919  | MSI2_ENSG00000153944                                      |
| 17 | 5.5E+07 | 5.5E+07 | KD2-H4K8la_peak_2691 | 5.09794  |                                                           |
| 17 | 5.5E+07 | 5.5E+07 | KD2-H4K8la_peak_2692 | 6.74498  |                                                           |
| 17 | 5.6E+07 | 5.6E+07 | KD2-H4K8la_peak_2693 | 13.37883 |                                                           |
| 17 | 5.6E+07 | 5.6E+07 | KD2-H4K8la_peak_2694 | 10.61716 |                                                           |
| 17 | 5.6E+07 | 5.6E+07 | KD2-H4K8la_peak_2695 | 7.91061  |                                                           |
| 17 | 5.6E+07 | 5.6E+07 | KD2-H4K8la_peak_2696 | 7.63122  |                                                           |
| 17 | 5.6E+07 | 5.6E+07 | KD2-H4K8la_peak_2697 | 7.3993   |                                                           |
| 17 | 5.6E+07 | 5.6E+07 | KD2-H4K8la_peak_2698 | 11.81691 |                                                           |
| 17 | 5.6E+07 | 5.6E+07 | KD2-H4K8la_peak_2699 | 12.70652 |                                                           |
| 17 | 5.6E+07 | 5.6E+07 | KD2-H4K8la_peak_2700 | 8.76116  |                                                           |
| 17 | 5.6E+07 | 5.6E+07 | KD2-H4K8la_peak_2701 | 5.67596  |                                                           |
| 17 | 5.6E+07 | 5.6E+07 | KD2-H4K8la_peak_2702 | 10.20357 |                                                           |
| 17 | 5.6E+07 | 5.6E+07 | KD2-H4K8la_peak_2703 | 7.72519  |                                                           |
| 17 | 5.6E+07 | 5.6E+07 | KD2-H4K8la_peak_2704 | 12.74311 |                                                           |
| 17 | 5.6E+07 | 5.6E+07 | KD2-H4K8la_peak_2705 | 8.59561  |                                                           |
| 17 | 5.6E+07 | 5.6E+07 | KD2-H4K8la_peak_2706 | 6.3399   |                                                           |
| 17 | 5.6E+07 | 5.6E+07 | KD2-H4K8la_peak_2707 | 9.92993  |                                                           |
| 17 | 5.6E+07 | 5.6E+07 | KD2-H4K8la_peak_2708 | 7.3993   |                                                           |
| 17 | 5.6E+07 | 5.6E+07 | KD2-H4K8la_peak_2709 | 8.48488  |                                                           |
| 17 | 5.6E+07 | 5.6E+07 | KD2-H4K8la_peak_2710 | 7.77341  |                                                           |
| 17 | 5.6E+07 | 5.6E+07 | KD2-H4K8la_peak_2711 | 9.61894  |                                                           |
| 17 | 5.6E+07 | 5.6E+07 | KD2-H4K8la_peak_2712 | 5.43264  |                                                           |

|    |         |         |                      |          |                                                       |
|----|---------|---------|----------------------|----------|-------------------------------------------------------|
| 17 | 5.6E+07 | 5.6E+07 | KD2-H4K8la_peak_2713 | 6.61296  |                                                       |
| 17 | 5.6E+07 | 5.6E+07 | KD2-H4K8la_peak_2714 | 6.09309  |                                                       |
| 17 | 5.6E+07 | 5.6E+07 | KD2-H4K8la_peak_2715 | 14.7348  |                                                       |
| 17 | 5.6E+07 | 5.6E+07 | KD2-H4K8la_peak_2716 | 11.7362  |                                                       |
| 17 | 5.6E+07 | 5.6E+07 | KD2-H4K8la_peak_2717 | 10.0147  |                                                       |
| 17 | 5.6E+07 | 5.6E+07 | KD2-H4K8la_peak_2718 | 6.47266  |                                                       |
| 17 | 5.6E+07 | 5.6E+07 | KD2-H4K8la_peak_2719 | 9.61894  |                                                       |
| 17 | 5.6E+07 | 5.6E+07 | KD2-H4K8la_peak_2720 | 12.98337 |                                                       |
| 17 | 5.6E+07 | 5.6E+07 | KD2-H4K8la_peak_2721 | 10.22817 |                                                       |
| 17 | 5.6E+07 | 5.6E+07 | KD2-H4K8la_peak_2722 | 8.1293   |                                                       |
| 17 | 5.6E+07 | 5.6E+07 | KD2-H4K8la_peak_2723 | 9.20163  |                                                       |
| 17 | 5.6E+07 | 5.6E+07 | KD2-H4K8la_peak_2724 | 8.40421  |                                                       |
| 17 | 5.6E+07 | 5.6E+07 | KD2-H4K8la_peak_2725 | 7.94013  |                                                       |
| 17 | 5.6E+07 | 5.6E+07 | KD2-H4K8la_peak_2726 | 13.27013 |                                                       |
| 17 | 5.6E+07 | 5.6E+07 | KD2-H4K8la_peak_2727 | 8.15033  |                                                       |
| 17 | 5.6E+07 | 5.6E+07 | KD2-H4K8la_peak_2728 | 9.87752  |                                                       |
| 17 | 5.6E+07 | 5.6E+07 | KD2-H4K8la_peak_2729 | 6.13507  |                                                       |
| 17 | 5.6E+07 | 5.6E+07 | KD2-H4K8la_peak_2730 | 5.70367  |                                                       |
| 17 | 5.6E+07 | 5.6E+07 | KD2-H4K8la_peak_2731 | 7.68525  |                                                       |
| 17 | 5.6E+07 | 5.6E+07 | KD2-H4K8la_peak_2732 | 8.76116  |                                                       |
| 17 | 5.6E+07 | 5.6E+07 | KD2-H4K8la_peak_2733 | 5.33711  |                                                       |
| 17 | 5.6E+07 | 5.6E+07 | KD2-H4K8la_peak_2734 | 7.12308  | CUEDC1_ENSG00000180891                                |
| 17 | 5.6E+07 | 5.6E+07 | KD2-H4K8la_peak_2735 | 8.95597  | SRSF1_ENSG00000136450                                 |
| 17 | 5.6E+07 | 5.6E+07 | KD2-H4K8la_peak_2736 | 6.4136   | RP11-159D12.10_ENSG00000266290;DYNLL2_ENSG00000264364 |
| 17 | 5.6E+07 | 5.6E+07 | KD2-H4K8la_peak_2737 | 6.57176  | MKS1_ENSG0000011143;LPO_ENSG00000167419               |
| 17 | 5.6E+07 | 5.6E+07 | KD2-H4K8la_peak_2738 | 11.42932 | BZRAP1-AS1_ENSG00000265148                            |
| 17 | 5.6E+07 | 5.6E+07 | KD2-H4K8la_peak_2739 | 5.24676  |                                                       |
| 17 | 5.6E+07 | 5.6E+07 | KD2-H4K8la_peak_2740 | 6.98743  | SUPT4H1_ENSG00000213246                               |
| 17 | 5.7E+07 | 5.7E+07 | KD2-H4K8la_peak_2741 | 14.7348  |                                                       |
| 17 | 5.7E+07 | 5.7E+07 | KD2-H4K8la_peak_2742 | 10.47118 | TEX14_ENSG00000121101;RAD51C_ENSG00000108384          |
| 17 | 5.7E+07 | 5.7E+07 | KD2-H4K8la_peak_2743 | 11.57314 | PPM1E_ENSG00000175175                                 |
| 17 | 5.7E+07 | 5.7E+07 | KD2-H4K8la_peak_2744 | 8.39919  | SMG8_ENSG00000167447                                  |
| 17 | 5.7E+07 | 5.7E+07 | KD2-H4K8la_peak_2745 | 5.58883  |                                                       |
| 17 | 5.7E+07 | 5.7E+07 | KD2-H4K8la_peak_2746 | 7.56395  |                                                       |
| 17 | 5.8E+07 | 5.8E+07 | KD2-H4K8la_peak_2747 | 10.11868 |                                                       |
| 17 | 5.8E+07 | 5.8E+07 | KD2-H4K8la_peak_2748 | 11.25108 |                                                       |
| 17 | 5.8E+07 | 5.8E+07 | KD2-H4K8la_peak_2749 | 8.76116  |                                                       |
| 17 | 5.8E+07 | 5.8E+07 | KD2-H4K8la_peak_2750 | 6.38565  | CLTC_ENSG00000141367                                  |
| 17 | 5.8E+07 | 5.8E+07 | KD2-H4K8la_peak_2751 | 5.5326   | PTRH2_ENSG00000141378;VMP1_ENSG00000062716            |
| 17 | 5.8E+07 | 5.8E+07 | KD2-H4K8la_peak_2752 | 11.16073 | TUBD1_ENSG00000108423;RPS6KB1_ENSG00000108443         |
| 17 | 5.8E+07 | 5.8E+07 | KD2-H4K8la_peak_2753 | 5.36015  |                                                       |
| 17 | 5.8E+07 | 5.8E+07 | KD2-H4K8la_peak_2754 | 6.97699  | C17orf64_ENSG00000141371                              |
| 17 | 5.8E+07 | 5.8E+07 | KD2-H4K8la_peak_2755 | 8.13557  | USP32_ENSG00000170832                                 |
| 17 | 5.9E+07 | 5.9E+07 | KD2-H4K8la_peak_2756 | 7.19244  | PPM1D_ENSG00000170836                                 |
| 17 | 5.9E+07 | 5.9E+07 | KD2-H4K8la_peak_2757 | 12.3825  | RP11-136H19.1_ENSG00000267667                         |
| 17 | 5.9E+07 | 5.9E+07 | KD2-H4K8la_peak_2758 | 9.34957  |                                                       |

|    |         |         |                      |          |                                                        |
|----|---------|---------|----------------------|----------|--------------------------------------------------------|
| 17 | 5.9E+07 | 5.9E+07 | KD2-H4K8la_peak_2759 | 8.39919  |                                                        |
| 17 | 5.9E+07 | 5.9E+07 | KD2-H4K8la_peak_2760 | 5.83285  |                                                        |
| 17 | 5.9E+07 | 5.9E+07 | KD2-H4K8la_peak_2761 | 9.45281  |                                                        |
| 17 | 5.9E+07 | 5.9E+07 | KD2-H4K8la_peak_2762 | 6.59357  |                                                        |
| 17 | 5.9E+07 | 5.9E+07 | KD2-H4K8la_peak_2763 | 8.39919  | RP11-332H18.3_ENSG00000266934                          |
| 17 | 5.9E+07 | 5.9E+07 | KD2-H4K8la_peak_2764 | 11.63682 | RP11-332H18.3_ENSG00000266934                          |
| 17 | 5.9E+07 | 5.9E+07 | KD2-H4K8la_peak_2765 | 8.24671  |                                                        |
| 17 | 5.9E+07 | 5.9E+07 | KD2-H4K8la_peak_2766 | 9.34828  |                                                        |
| 17 | 5.9E+07 | 5.9E+07 | KD2-H4K8la_peak_2767 | 5.84385  |                                                        |
| 17 | 5.9E+07 | 5.9E+07 | KD2-H4K8la_peak_2768 | 9.19451  |                                                        |
| 17 | 5.9E+07 | 5.9E+07 | KD2-H4K8la_peak_2769 | 8.03267  | RP11-332H18.4_ENSG00000267280;C17orf82_ENSG00000187013 |
| 17 | 5.9E+07 | 5.9E+07 | KD2-H4K8la_peak_2770 | 7.84882  | C17orf82_ENSG00000187013                               |
| 17 | 5.9E+07 | 5.9E+07 | KD2-H4K8la_peak_2771 | 9.44217  |                                                        |
| 17 | 6E+07   | 6E+07   | KD2-H4K8la_peak_2772 | 8.84265  |                                                        |
| 17 | 6E+07   | 6E+07   | KD2-H4K8la_peak_2773 | 4.6555   |                                                        |
| 17 | 6E+07   | 6E+07   | KD2-H4K8la_peak_2774 | 8.0374   |                                                        |
| 17 | 6E+07   | 6E+07   | KD2-H4K8la_peak_2775 | 6.13507  |                                                        |
| 17 | 6E+07   | 6E+07   | KD2-H4K8la_peak_2776 | 10.97465 | INTS2_ENSG00000108506                                  |
| 17 | 6E+07   | 6E+07   | KD2-H4K8la_peak_2777 | 11.87032 | MED13_ENSG00000108510                                  |
| 17 | 6E+07   | 6E+07   | KD2-H4K8la_peak_2778 | 5.64331  |                                                        |
| 17 | 6.1E+07 | 6.1E+07 | KD2-H4K8la_peak_2779 | 8.13557  |                                                        |
| 17 | 6.1E+07 | 6.1E+07 | KD2-H4K8la_peak_2780 | 18.43157 |                                                        |
| 17 | 6.1E+07 | 6.1E+07 | KD2-H4K8la_peak_2781 | 9.87983  | MRC2_ENSG00000011028                                   |
| 17 | 6.1E+07 | 6.1E+07 | KD2-H4K8la_peak_2782 | 6.13507  |                                                        |
| 17 | 6.1E+07 | 6.1E+07 | KD2-H4K8la_peak_2783 | 13.27013 |                                                        |
| 17 | 6.1E+07 | 6.1E+07 | KD2-H4K8la_peak_2784 | 9.19451  |                                                        |
| 17 | 6.1E+07 | 6.1E+07 | KD2-H4K8la_peak_2785 | 9.5329   |                                                        |
| 17 | 6.2E+07 | 6.2E+07 | KD2-H4K8la_peak_2786 | 5.83285  |                                                        |
| 17 | 6.2E+07 | 6.2E+07 | KD2-H4K8la_peak_2787 | 7.21572  | RP11-269G24.4_ENSG00000265282                          |
| 17 | 6.2E+07 | 6.2E+07 | KD2-H4K8la_peak_2788 | 8.50781  |                                                        |
| 17 | 6.2E+07 | 6.2E+07 | KD2-H4K8la_peak_2789 | 14.89648 |                                                        |
| 17 | 6.2E+07 | 6.2E+07 | KD2-H4K8la_peak_2790 | 11.70246 |                                                        |
| 17 | 6.2E+07 | 6.2E+07 | KD2-H4K8la_peak_2791 | 6.56022  | CYB561_ENSG00000008283                                 |
| 17 | 6.2E+07 | 6.2E+07 | KD2-H4K8la_peak_2792 | 19.14893 | CYB561_ENSG00000008283                                 |
| 17 | 6.2E+07 | 6.2E+07 | KD2-H4K8la_peak_2793 | 5.22616  | TACO1_ENSG00000136463                                  |
| 17 | 6.2E+07 | 6.2E+07 | KD2-H4K8la_peak_2794 | 20.04954 | LIMD2_ENSG00000136490                                  |
| 17 | 6.2E+07 | 6.2E+07 | KD2-H4K8la_peak_2795 | 6.57426  |                                                        |
| 17 | 6.2E+07 | 6.2E+07 | KD2-H4K8la_peak_2796 | 5.91374  | C17orf72_ENSG00000224383                               |
| 17 | 6.3E+07 | 6.3E+07 | KD2-H4K8la_peak_2797 | 4.44613  |                                                        |
| 17 | 6.3E+07 | 6.3E+07 | KD2-H4K8la_peak_2798 | 5.90392  |                                                        |
| 17 | 6.3E+07 | 6.3E+07 | KD2-H4K8la_peak_2799 | 12.83706 | LRR37A3_ENSG00000176809                                |
| 17 | 6.3E+07 | 6.3E+07 | KD2-H4K8la_peak_2800 | 9.18773  | AMZ2P1_ENSG00000214174                                 |
| 17 | 6.3E+07 | 6.3E+07 | KD2-H4K8la_peak_2801 | 5.80814  | AMZ2P1_ENSG00000214174                                 |
| 17 | 6.3E+07 | 6.3E+07 | KD2-H4K8la_peak_2802 | 7.94013  | GNA13_ENSG00000120063                                  |
| 17 | 6.3E+07 | 6.3E+07 | KD2-H4K8la_peak_2803 | 8.44557  |                                                        |
| 17 | 6.4E+07 | 6.4E+07 | KD2-H4K8la_peak_2804 | 6.20793  | AXIN2_ENSG00000168646                                  |

|    |         |         |                      |          |                                                                          |
|----|---------|---------|----------------------|----------|--------------------------------------------------------------------------|
| 17 | 6.4E+07 | 6.4E+07 | KD2-H4K8la_peak_2805 | 7.77341  |                                                                          |
| 17 | 6.5E+07 | 6.5E+07 | KD2-H4K8la_peak_2806 | 6.3399   |                                                                          |
| 17 | 6.5E+07 | 6.5E+07 | KD2-H4K8la_peak_2807 | 10.10182 | CACNG4_ENSG00000075461                                                   |
| 17 | 6.5E+07 | 6.5E+07 | KD2-H4K8la_peak_2808 | 12.77347 |                                                                          |
| 17 | 6.5E+07 | 6.5E+07 | KD2-H4K8la_peak_2809 | 4.6555   |                                                                          |
| 17 | 6.5E+07 | 6.5E+07 | KD2-H4K8la_peak_2810 | 5.0802   |                                                                          |
| 17 | 6.5E+07 | 6.5E+07 | KD2-H4K8la_peak_2811 | 6.00056  |                                                                          |
| 17 | 6.5E+07 | 6.5E+07 | KD2-H4K8la_peak_2812 | 7.86224  |                                                                          |
| 17 | 6.5E+07 | 6.5E+07 | KD2-H4K8la_peak_2813 | 6.59654  |                                                                          |
| 17 | 6.5E+07 | 6.5E+07 | KD2-H4K8la_peak_2814 | 12.55003 |                                                                          |
| 17 | 6.5E+07 | 6.5E+07 | KD2-H4K8la_peak_2815 | 13.76639 |                                                                          |
| 17 | 6.5E+07 | 6.5E+07 | KD2-H4K8la_peak_2816 | 5.24027  | RP11-349A8.3_ENSG00000264491                                             |
| 17 | 6.5E+07 | 6.5E+07 | KD2-H4K8la_peak_2817 | 5.22616  | HELZ_ENSG00000198265;RP11-401F2.3_ENSG00000266473                        |
| 17 | 6.5E+07 | 6.5E+07 | KD2-H4K8la_peak_2818 | 5.468    | HELZ_ENSG00000198265                                                     |
| 17 | 6.5E+07 | 6.5E+07 | KD2-H4K8la_peak_2819 | 5.23773  | PSMD12_ENSG00000197170                                                   |
| 17 | 6.5E+07 | 6.5E+07 | KD2-H4K8la_peak_2820 | 8.4237   | PITPNC1_ENSG00000154217                                                  |
| 17 | 6.6E+07 | 6.6E+07 | KD2-H4K8la_peak_2821 | 8.00701  |                                                                          |
| 17 | 6.6E+07 | 6.6E+07 | KD2-H4K8la_peak_2822 | 10.59328 |                                                                          |
| 17 | 6.6E+07 | 6.6E+07 | KD2-H4K8la_peak_2823 | 6.03112  | NOL11_ENSG00000130935                                                    |
| 17 | 6.6E+07 | 6.6E+07 | KD2-H4K8la_peak_2824 | 11.24289 | BPTF_ENSG00000171634                                                     |
| 17 | 6.6E+07 | 6.6E+07 | KD2-H4K8la_peak_2825 | 4.6555   | C17orf58_ENSG00000186665                                                 |
| 17 | 6.6E+07 | 6.6E+07 | KD2-H4K8la_peak_2826 | 5.58883  |                                                                          |
| 17 | 6.6E+07 | 6.6E+07 | KD2-H4K8la_peak_2827 | 5.43278  |                                                                          |
| 17 | 6.7E+07 | 6.7E+07 | KD2-H4K8la_peak_2828 | 5.67596  | ABCA5_ENSG00000154265                                                    |
| 17 | 6.7E+07 | 6.7E+07 | KD2-H4K8la_peak_2829 | 8.13557  | ABCA5_ENSG00000154265                                                    |
| 17 | 6.7E+07 | 6.7E+07 | KD2-H4K8la_peak_2830 | 7.23932  | MAP2K6_ENSG00000108984                                                   |
| 17 | 6.9E+07 | 6.9E+07 | KD2-H4K8la_peak_2831 | 5.33364  | RP11-238F2.1_ENSG00000271239                                             |
| 17 | 7.1E+07 | 7.1E+07 | KD2-H4K8la_peak_2832 | 5.29444  |                                                                          |
| 17 | 7.1E+07 | 7.1E+07 | KD2-H4K8la_peak_2833 | 8.00569  | SLC39A11_ENSG00000133195                                                 |
| 17 | 7.1E+07 | 7.1E+07 | KD2-H4K8la_peak_2834 | 6.86458  | COG1_ENSG00000166685                                                     |
| 17 | 7.1E+07 | 7.1E+07 | KD2-H4K8la_peak_2835 | 8.69391  |                                                                          |
| 17 | 7.1E+07 | 7.1E+07 | KD2-H4K8la_peak_2836 | 15.52202 |                                                                          |
| 17 | 7.1E+07 | 7.1E+07 | KD2-H4K8la_peak_2837 | 7.60503  |                                                                          |
| 17 | 7.1E+07 | 7.1E+07 | KD2-H4K8la_peak_2838 | 12.50352 |                                                                          |
| 17 | 7.2E+07 | 7.2E+07 | KD2-H4K8la_peak_2839 | 5.57299  |                                                                          |
| 17 | 7.2E+07 | 7.2E+07 | KD2-H4K8la_peak_2840 | 9.87983  |                                                                          |
| 17 | 7.2E+07 | 7.2E+07 | KD2-H4K8la_peak_2841 | 5.27164  |                                                                          |
| 17 | 7.3E+07 | 7.3E+07 | KD2-H4K8la_peak_2842 | 9.5503   | MIR3615_ENSG00000266036;MIR3615_ENSG00000264624;SLC9A3R1_ENSG00000109062 |
| 17 | 7.3E+07 | 7.3E+07 | KD2-H4K8la_peak_2843 | 7.36752  | CDR2L_ENSG00000109089                                                    |
| 17 | 7.3E+07 | 7.3E+07 | KD2-H4K8la_peak_2844 | 7.79412  | ICT1_ENSG00000167862                                                     |
| 17 | 7.3E+07 | 7.3E+07 | KD2-H4K8la_peak_2845 | 5.33301  |                                                                          |
| 17 | 7.3E+07 | 7.3E+07 | KD2-H4K8la_peak_2846 | 11.87032 |                                                                          |
| 17 | 7.3E+07 | 7.3E+07 | KD2-H4K8la_peak_2847 | 6.59654  | ATP5H_ENSG00000167863                                                    |
| 17 | 7.3E+07 | 7.3E+07 | KD2-H4K8la_peak_2848 | 9.48529  | ARMC7_ENSG00000125449                                                    |
| 17 | 7.3E+07 | 7.3E+07 | KD2-H4K8la_peak_2849 | 6.03112  | NT5C_ENSG00000125458                                                     |
| 17 | 7.3E+07 | 7.3E+07 | KD2-H4K8la_peak_2850 | 13.27013 | SUMO2_ENSG00000188612                                                    |

|    |         |         |                      |          |                                                                     |
|----|---------|---------|----------------------|----------|---------------------------------------------------------------------|
| 17 | 7.3E+07 | 7.3E+07 | KD2-H4K8la_peak_2851 | 15.77733 | SUMO2_ENSG00000188612                                               |
| 17 | 7.3E+07 | 7.3E+07 | KD2-H4K8la_peak_2852 | 7.86224  | GGA3_ENSG00000125447;MRPS7_ENSG00000125445                          |
| 17 | 7.3E+07 | 7.3E+07 | KD2-H4K8la_peak_2853 | 8.89364  | MIF4GD_ENSG00000125457;RP11-649A18.12_ENSG00000263843               |
| 17 | 7.3E+07 | 7.3E+07 | KD2-H4K8la_peak_2854 | 7.30347  | MIF4GD_ENSG00000125457;RP11-649A18.12_ENSG00000263843               |
| 17 | 7.3E+07 | 7.3E+07 | KD2-H4K8la_peak_2855 | 8.3497   |                                                                     |
| 17 | 7.4E+07 | 7.4E+07 | KD2-H4K8la_peak_2856 | 10.4679  | CASKIN2_ENSG00000177303;TSEN54_ENSG00000182173                      |
| 17 | 7.4E+07 | 7.4E+07 | KD2-H4K8la_peak_2857 | 4.69635  |                                                                     |
| 17 | 7.4E+07 | 7.4E+07 | KD2-H4K8la_peak_2858 | 6.83387  |                                                                     |
| 17 | 7.4E+07 | 7.4E+07 | KD2-H4K8la_peak_2859 | 23.25607 | MYO15B_ENSG00000266714                                              |
| 17 | 7.4E+07 | 7.4E+07 | KD2-H4K8la_peak_2860 | 12.83706 |                                                                     |
| 17 | 7.4E+07 | 7.4E+07 | KD2-H4K8la_peak_2861 | 5.66318  |                                                                     |
| 17 | 7.4E+07 | 7.4E+07 | KD2-H4K8la_peak_2862 | 11.7374  |                                                                     |
| 17 | 7.4E+07 | 7.4E+07 | KD2-H4K8la_peak_2863 | 8.3497   | WBP2_ENSG00000132471                                                |
| 17 | 7.4E+07 | 7.4E+07 | KD2-H4K8la_peak_2864 | 8.48488  | TRIM65_ENSG00000141569;RP11-552F3.10_ENSG00000267342                |
| 17 | 7.4E+07 | 7.4E+07 | KD2-H4K8la_peak_2865 | 11.24289 |                                                                     |
| 17 | 7.4E+07 | 7.4E+07 | KD2-H4K8la_peak_2866 | 12.13455 | CDK3_ENSG00000250506                                                |
| 17 | 7.4E+07 | 7.4E+07 | KD2-H4K8la_peak_2867 | 21.32197 | SRP68_ENSG00000167881;ZACN_ENSG00000186919                          |
| 17 | 7.4E+07 | 7.4E+07 | KD2-H4K8la_peak_2868 | 11.7362  |                                                                     |
| 17 | 7.4E+07 | 7.4E+07 | KD2-H4K8la_peak_2869 | 4.68264  | RNF157_ENSG00000141576                                              |
| 17 | 7.4E+07 | 7.4E+07 | KD2-H4K8la_peak_2870 | 5.99975  | PRPSAP1_ENSG00000161542                                             |
| 17 | 7.4E+07 | 7.4E+07 | KD2-H4K8la_peak_2871 | 6.13507  |                                                                     |
| 17 | 7.5E+07 | 7.5E+07 | KD2-H4K8la_peak_2872 | 6.47266  |                                                                     |
| 17 | 7.5E+07 | 7.5E+07 | KD2-H4K8la_peak_2873 | 10.94155 |                                                                     |
| 17 | 7.5E+07 | 7.5E+07 | KD2-H4K8la_peak_2874 | 11.92959 |                                                                     |
| 17 | 7.5E+07 | 7.5E+07 | KD2-H4K8la_peak_2875 | 11.55303 |                                                                     |
| 17 | 7.5E+07 | 7.5E+07 | KD2-H4K8la_peak_2876 | 11.62424 |                                                                     |
| 17 | 7.5E+07 | 7.5E+07 | KD2-H4K8la_peak_2877 | 16.34466 |                                                                     |
| 17 | 7.5E+07 | 7.5E+07 | KD2-H4K8la_peak_2878 | 15.79607 |                                                                     |
| 17 | 7.5E+07 | 7.5E+07 | KD2-H4K8la_peak_2879 | 7.0396   |                                                                     |
| 17 | 7.5E+07 | 7.5E+07 | KD2-H4K8la_peak_2880 | 11.90654 | SRSF2_ENSG00000161547;MFSD11_ENSG00000092931;MIR636_ENSG00000207556 |
| 17 | 7.5E+07 | 7.5E+07 | KD2-H4K8la_peak_2881 | 4.96683  |                                                                     |
| 17 | 7.5E+07 | 7.5E+07 | KD2-H4K8la_peak_2882 | 7.80361  |                                                                     |
| 17 | 7.5E+07 | 7.5E+07 | KD2-H4K8la_peak_2883 | 11.64946 | AC015815.3_ENSG00000203316                                          |
| 17 | 7.5E+07 | 7.5E+07 | KD2-H4K8la_peak_2884 | 14.26347 |                                                                     |
| 17 | 7.5E+07 | 7.5E+07 | KD2-H4K8la_peak_2885 | 9.20163  | RP11-285E9.6_ENSG00000263718;SEPT9_ENSG00000184640                  |
| 17 | 7.5E+07 | 7.5E+07 | KD2-H4K8la_peak_2886 | 6.39807  |                                                                     |
| 17 | 7.5E+07 | 7.5E+07 | KD2-H4K8la_peak_2887 | 12.77347 |                                                                     |
| 17 | 7.5E+07 | 7.5E+07 | KD2-H4K8la_peak_2888 | 11.28887 |                                                                     |
| 17 | 7.5E+07 | 7.5E+07 | KD2-H4K8la_peak_2889 | 7.55141  |                                                                     |
| 17 | 7.5E+07 | 7.5E+07 | KD2-H4K8la_peak_2890 | 9.18773  |                                                                     |
| 17 | 7.5E+07 | 7.5E+07 | KD2-H4K8la_peak_2891 | 6.72313  |                                                                     |
| 17 | 7.5E+07 | 7.5E+07 | KD2-H4K8la_peak_2892 | 7.9957   | RP11-936I5.1_ENSG00000266998                                        |
| 17 | 7.5E+07 | 7.5E+07 | KD2-H4K8la_peak_2893 | 10.34952 | RP11-936I5.1_ENSG00000266998                                        |
| 17 | 7.5E+07 | 7.5E+07 | KD2-H4K8la_peak_2894 | 10.87112 |                                                                     |
| 17 | 7.5E+07 | 7.5E+07 | KD2-H4K8la_peak_2895 | 14.61956 |                                                                     |
| 17 | 7.5E+07 | 7.5E+07 | KD2-H4K8la_peak_2896 | 11.18137 |                                                                     |

|    |         |         |                      |          |                               |
|----|---------|---------|----------------------|----------|-------------------------------|
| 17 | 7.5E+07 | 7.5E+07 | KD2-H4K8la_peak_2897 | 7.36235  |                               |
| 17 | 7.5E+07 | 7.5E+07 | KD2-H4K8la_peak_2898 | 7.60503  |                               |
| 17 | 7.6E+07 | 7.6E+07 | KD2-H4K8la_peak_2899 | 4.86896  |                               |
| 17 | 7.6E+07 | 7.6E+07 | KD2-H4K8la_peak_2900 | 13.51092 |                               |
| 17 | 7.6E+07 | 7.6E+07 | KD2-H4K8la_peak_2901 | 5.43278  |                               |
| 17 | 7.6E+07 | 7.6E+07 | KD2-H4K8la_peak_2902 | 6.13507  |                               |
| 17 | 7.6E+07 | 7.6E+07 | KD2-H4K8la_peak_2903 | 10.20834 |                               |
| 17 | 7.6E+07 | 7.6E+07 | KD2-H4K8la_peak_2904 | 21.14996 | FLJ45079_ENSG00000204283      |
| 17 | 7.6E+07 | 7.6E+07 | KD2-H4K8la_peak_2905 | 8.3068   |                               |
| 17 | 7.6E+07 | 7.6E+07 | KD2-H4K8la_peak_2906 | 9.67249  |                               |
| 17 | 7.6E+07 | 7.6E+07 | KD2-H4K8la_peak_2907 | 5.24027  |                               |
| 17 | 7.6E+07 | 7.6E+07 | KD2-H4K8la_peak_2908 | 6.44746  |                               |
| 17 | 7.6E+07 | 7.6E+07 | KD2-H4K8la_peak_2909 | 5.26403  | SYNGR2_ENSG00000108639        |
| 17 | 7.6E+07 | 7.6E+07 | KD2-H4K8la_peak_2910 | 9.44217  | BIRC5_ENSG00000089685         |
| 17 | 7.6E+07 | 7.6E+07 | KD2-H4K8la_peak_2911 | 6.53039  | TMEM235_ENSG00000204278       |
| 17 | 7.6E+07 | 7.6E+07 | KD2-H4K8la_peak_2912 | 6.68593  |                               |
| 17 | 7.6E+07 | 7.6E+07 | KD2-H4K8la_peak_2913 | 9.20163  |                               |
| 17 | 7.6E+07 | 7.6E+07 | KD2-H4K8la_peak_2914 | 7.78365  | THA1P_ENSG00000267676         |
| 17 | 7.6E+07 | 7.6E+07 | KD2-H4K8la_peak_2915 | 10.50851 |                               |
| 17 | 7.6E+07 | 7.6E+07 | KD2-H4K8la_peak_2916 | 8.59561  |                               |
| 17 | 7.6E+07 | 7.6E+07 | KD2-H4K8la_peak_2917 | 16.12381 |                               |
| 17 | 7.6E+07 | 7.6E+07 | KD2-H4K8la_peak_2918 | 5.40012  | PGS1_ENSG00000087157          |
| 17 | 7.7E+07 | 7.7E+07 | KD2-H4K8la_peak_2919 | 6.19992  |                               |
| 17 | 7.7E+07 | 7.7E+07 | KD2-H4K8la_peak_2920 | 5.58883  | CYTH1_ENSG00000108669         |
| 17 | 7.7E+07 | 7.7E+07 | KD2-H4K8la_peak_2921 | 5.80814  | USP36_ENSG00000055483         |
| 17 | 7.7E+07 | 7.7E+07 | KD2-H4K8la_peak_2922 | 5.81654  |                               |
| 17 | 7.7E+07 | 7.7E+07 | KD2-H4K8la_peak_2923 | 6.75222  |                               |
| 17 | 7.7E+07 | 7.7E+07 | KD2-H4K8la_peak_2924 | 13.00097 | TIMP2_ENSG00000035862         |
| 17 | 7.7E+07 | 7.7E+07 | KD2-H4K8la_peak_2925 | 7.0396   |                               |
| 17 | 7.7E+07 | 7.7E+07 | KD2-H4K8la_peak_2926 | 14.19183 | LGALS3BP_ENSG00000108679      |
| 17 | 7.7E+07 | 7.7E+07 | KD2-H4K8la_peak_2927 | 11.15747 | CANT1_ENSG00000171302         |
| 17 | 7.7E+07 | 7.7E+07 | KD2-H4K8la_peak_2928 | 6.3399   |                               |
| 17 | 7.8E+07 | 7.8E+07 | KD2-H4K8la_peak_2929 | 18.43157 |                               |
| 17 | 7.8E+07 | 7.8E+07 | KD2-H4K8la_peak_2930 | 10.66741 |                               |
| 17 | 7.8E+07 | 7.8E+07 | KD2-H4K8la_peak_2931 | 12.85504 | CBX2_ENSG00000173894          |
| 17 | 7.8E+07 | 7.8E+07 | KD2-H4K8la_peak_2932 | 6.59654  | CBX2_ENSG00000173894          |
| 17 | 7.8E+07 | 7.8E+07 | KD2-H4K8la_peak_2933 | 6.86458  |                               |
| 17 | 7.8E+07 | 7.8E+07 | KD2-H4K8la_peak_2934 | 16.55399 |                               |
| 17 | 7.8E+07 | 7.8E+07 | KD2-H4K8la_peak_2935 | 15.95674 |                               |
| 17 | 7.8E+07 | 7.8E+07 | KD2-H4K8la_peak_2936 | 4.69635  |                               |
| 17 | 7.8E+07 | 7.8E+07 | KD2-H4K8la_peak_2937 | 7.94013  |                               |
| 17 | 7.8E+07 | 7.8E+07 | KD2-H4K8la_peak_2938 | 6.06216  | CTD-2529O21.1_ENSG00000262172 |
| 17 | 7.8E+07 | 7.8E+07 | KD2-H4K8la_peak_2939 | 7.94013  |                               |
| 17 | 7.8E+07 | 7.8E+07 | KD2-H4K8la_peak_2940 | 9.77334  | GAA_ENSG00000171298           |
| 17 | 7.8E+07 | 7.8E+07 | KD2-H4K8la_peak_2941 | 7.3993   | RNF213_ENSG00000173821        |
| 17 | 7.8E+07 | 7.8E+07 | KD2-H4K8la_peak_2942 | 4.68264  | RNF213_ENSG00000173821        |



|    |         |         |                      |          |                                                                                                        |
|----|---------|---------|----------------------|----------|--------------------------------------------------------------------------------------------------------|
| 17 | 7.8E+07 | 7.8E+07 | KD2-H4K8la_peak_2943 | 17.56185 | CTD-2526A2.2_ENSG00000260369                                                                           |
| 17 | 7.8E+07 | 7.8E+07 | KD2-H4K8la_peak_2944 | 9.14592  | CTD-2526A2.2_ENSG00000260369                                                                           |
| 17 | 7.9E+07 | 7.9E+07 | KD2-H4K8la_peak_2945 | 9.29385  | RPTOR_ENSG00000141564                                                                                  |
| 17 | 7.9E+07 | 7.9E+07 | KD2-H4K8la_peak_2946 | 9.92226  | RPTOR_ENSG00000141564                                                                                  |
| 17 | 7.9E+07 | 7.9E+07 | KD2-H4K8la_peak_2947 | 5.23773  |                                                                                                        |
| 17 | 7.9E+07 | 7.9E+07 | KD2-H4K8la_peak_2948 | 11.31083 |                                                                                                        |
| 17 | 7.9E+07 | 7.9E+07 | KD2-H4K8la_peak_2949 | 6.98743  |                                                                                                        |
| 17 | 7.9E+07 | 7.9E+07 | KD2-H4K8la_peak_2950 | 12.44878 | CHMP6_ENSG00000176108                                                                                  |
| 17 | 7.9E+07 | 7.9E+07 | KD2-H4K8la_peak_2951 | 6.85108  |                                                                                                        |
| 17 | 7.9E+07 | 7.9E+07 | KD2-H4K8la_peak_2952 | 8.22514  | AATK_ENSG00000181409;AATK-AS1_ENSG00000225180                                                          |
| 17 | 7.9E+07 | 7.9E+07 | KD2-H4K8la_peak_2953 | 9.10568  | AATK_ENSG00000181409                                                                                   |
| 17 | 7.9E+07 | 7.9E+07 | KD2-H4K8la_peak_2954 | 17.30105 | AZII_ENSG00000141577                                                                                   |
| 17 | 7.9E+07 | 7.9E+07 | KD2-H4K8la_peak_2955 | 9.92226  | ENTHD2_ENSG00000167302;C17orf89_ENSG00000224877                                                        |
| 17 | 7.9E+07 | 7.9E+07 | KD2-H4K8la_peak_2956 | 9.9149   | SLC38A10_ENSG00000157637                                                                               |
| 17 | 7.9E+07 | 7.9E+07 | KD2-H4K8la_peak_2957 | 15.96001 | LINC00482_ENSG00000185168                                                                              |
| 17 | 7.9E+07 | 7.9E+07 | KD2-H4K8la_peak_2958 | 6.47266  |                                                                                                        |
| 17 | 7.9E+07 | 7.9E+07 | KD2-H4K8la_peak_2959 | 8.39919  |                                                                                                        |
| 17 | 7.9E+07 | 7.9E+07 | KD2-H4K8la_peak_2960 | 4.75945  |                                                                                                        |
| 17 | 7.9E+07 | 7.9E+07 | KD2-H4K8la_peak_2961 | 11.74575 |                                                                                                        |
| 17 | 7.9E+07 | 7.9E+07 | KD2-H4K8la_peak_2962 | 7.56738  | TMEM105_ENSG00000185332                                                                                |
| 17 | 7.9E+07 | 7.9E+07 | KD2-H4K8la_peak_2963 | 8.62939  |                                                                                                        |
| 17 | 7.9E+07 | 7.9E+07 | KD2-H4K8la_peak_2964 | 7.3993   |                                                                                                        |
| 17 | 7.9E+07 | 7.9E+07 | KD2-H4K8la_peak_2965 | 10.48445 |                                                                                                        |
| 17 | 7.9E+07 | 7.9E+07 | KD2-H4K8la_peak_2966 | 5.73529  |                                                                                                        |
| 17 | 7.9E+07 | 7.9E+07 | KD2-H4K8la_peak_2967 | 5.90392  |                                                                                                        |
| 17 | 7.9E+07 | 7.9E+07 | KD2-H4K8la_peak_2968 | 9.48547  |                                                                                                        |
| 17 | 7.9E+07 | 7.9E+07 | KD2-H4K8la_peak_2969 | 8.3574   |                                                                                                        |
| 17 | 7.9E+07 | 7.9E+07 | KD2-H4K8la_peak_2970 | 4.68264  |                                                                                                        |
| 17 | 7.9E+07 | 7.9E+07 | KD2-H4K8la_peak_2971 | 8.50453  |                                                                                                        |
| 17 | 7.9E+07 | 7.9E+07 | KD2-H4K8la_peak_2972 | 6.13507  |                                                                                                        |
| 17 | 7.9E+07 | 7.9E+07 | KD2-H4K8la_peak_2973 | 4.95845  |                                                                                                        |
| 17 | 7.9E+07 | 7.9E+07 | KD2-H4K8la_peak_2974 | 9.67249  |                                                                                                        |
| 17 | 7.9E+07 | 7.9E+07 | KD2-H4K8la_peak_2975 | 5.86422  |                                                                                                        |
| 17 | 7.9E+07 | 7.9E+07 | KD2-H4K8la_peak_2976 | 7.79412  |                                                                                                        |
| 17 | 7.9E+07 | 7.9E+07 | KD2-H4K8la_peak_2977 | 14.22324 |                                                                                                        |
| 17 | 7.9E+07 | 7.9E+07 | KD2-H4K8la_peak_2978 | 7.12308  | RP13-766D20.1_ENSG00000229947;RP13-766D20.2_ENSG00000229848                                            |
| 17 | 8E+07   | 8E+07   | KD2-H4K8la_peak_2979 | 9.87983  |                                                                                                        |
| 17 | 8E+07   | 8E+07   | KD2-H4K8la_peak_2980 | 14.55919 | OXLD1_ENSG00000204237;CCDC137_ENSG00000185298                                                          |
| 17 | 8E+07   | 8E+07   | KD2-H4K8la_peak_2981 | 7.94013  | RP13-1032I1.7_ENSG00000262049;MRPL12_ENSG00000262814;SLC25A10_ENSG00000262660;SLC25A10_ENSG00000183048 |
| 17 | 8E+07   | 8E+07   | KD2-H4K8la_peak_2982 | 6.03112  |                                                                                                        |
| 17 | 8E+07   | 8E+07   | KD2-H4K8la_peak_2983 | 9.19451  | FAM195B_ENSG00000225663                                                                                |
| 17 | 8E+07   | 8E+07   | KD2-H4K8la_peak_2984 | 5.90392  | P4HB_ENSG00000185624                                                                                   |
| 17 | 8E+07   | 8E+07   | KD2-H4K8la_peak_2985 | 6.95908  | RP11-498C9.3_ENSG00000262413                                                                           |
| 17 | 8E+07   | 8E+07   | KD2-H4K8la_peak_2986 | 5.48061  | ARHGDI1_ENSG00000141522                                                                                |
| 17 | 8E+07   | 8E+07   | KD2-H4K8la_peak_2987 | 24.81934 | ARHGDI1_ENSG00000141522                                                                                |
| 17 | 8E+07   | 8E+07   | KD2-H4K8la_peak_2988 | 7.48323  | ALYREF_ENSG00000183684;ANAPC11_ENSG00000141552                                                         |

|    |         |         |                      |          |                                                         |
|----|---------|---------|----------------------|----------|---------------------------------------------------------|
| 17 | 8E+07   | 8E+07   | KD2-H4K8la_peak_2989 | 9.03222  |                                                         |
| 17 | 8E+07   | 8E+07   | KD2-H4K8la_peak_2990 | 7.84781  |                                                         |
| 17 | 8E+07   | 8E+07   | KD2-H4K8la_peak_2991 | 10.27305 | RP11-498C9.17_ENSG00000264735                           |
| 17 | 8E+07   | 8E+07   | KD2-H4K8la_peak_2992 | 9.86736  |                                                         |
| 17 | 8E+07   | 8E+07   | KD2-H4K8la_peak_2993 | 13.27013 |                                                         |
| 17 | 8E+07   | 8E+07   | KD2-H4K8la_peak_2994 | 7.61975  | RFNG_ENSG00000169733;GPS1_ENSG00000169727               |
| 17 | 8E+07   | 8E+07   | KD2-H4K8la_peak_2995 | 15.63685 | DUS1L_ENSG00000169718                                   |
| 17 | 8E+07   | 8E+07   | KD2-H4K8la_peak_2996 | 15.47627 | FASN_ENSG00000169710                                    |
| 17 | 8E+07   | 8E+07   | KD2-H4K8la_peak_2997 | 6.2413   |                                                         |
| 17 | 8E+07   | 8E+07   | KD2-H4K8la_peak_2998 | 7.12308  |                                                         |
| 17 | 8E+07   | 8E+07   | KD2-H4K8la_peak_2999 | 8.29695  | CCDC57_ENSG00000176155;RP13-516M14.2_ENSG00000264548    |
| 17 | 8E+07   | 8E+07   | KD2-H4K8la_peak_3000 | 9.67249  | CSNK1D_ENSG00000141551                                  |
| 17 | 8E+07   | 8E+07   | KD2-H4K8la_peak_3001 | 10.47118 |                                                         |
| 17 | 8E+07   | 8E+07   | KD2-H4K8la_peak_3002 | 7.49897  |                                                         |
| 17 | 8.1E+07 | 8.1E+07 | KD2-H4K8la_peak_3003 | 8.48488  | WDR45B_ENSG00000141580                                  |
| 17 | 8.1E+07 | 8.1E+07 | KD2-H4K8la_peak_3004 | 8.39919  | RP11-388C12.1_ENSG00000263063;FN3KRP_ENSG00000141560    |
| 17 | 8.1E+07 | 8.1E+07 | KD2-H4K8la_peak_3005 | 6.56022  | FN3K_ENSG00000167363;RP11-388C12.5_ENSG00000263321      |
| 17 | 8.1E+07 | 8.1E+07 | KD2-H4K8la_peak_3006 | 4.86896  | B3GNTL1_ENSG00000175711                                 |
| 17 | 8.1E+07 | 8.1E+07 | KD2-H4K8la_peak_3007 | 12.24258 | B3GNTL1_ENSG00000175711                                 |
| 18 | 812508  | 812758  | KD2-H4K8la_peak_3008 | 9.11321  | YES1_ENSG00000176105;RP11-672L10.6_ENSG00000273355      |
| 18 | 2906845 | 2907131 | KD2-H4K8la_peak_3009 | 8.06229  |                                                         |
| 18 | 3246750 | 3246966 | KD2-H4K8la_peak_3010 | 5.36015  | RP13-270P17.3_ENSG00000272688;MYL12A_ENSG00000101608    |
| 18 | 3594600 | 3594835 | KD2-H4K8la_peak_3011 | 4.86896  | DLGAP1-AS1_ENSG00000177337                              |
| 18 | 3621985 | 3622189 | KD2-H4K8la_peak_3012 | 7.72421  |                                                         |
| 18 | 5238304 | 5238598 | KD2-H4K8la_peak_3013 | 7.83588  | RP11-835E18.5_ENSG00000265091;LINC00526_ENSG00000264575 |
| 18 | 5895751 | 5896046 | KD2-H4K8la_peak_3014 | 8.19799  | TMEM200C_ENSG00000206432                                |
| 18 | 8704715 | 8704990 | KD2-H4K8la_peak_3015 | 8.24908  | SOGA2_ENSG00000168502                                   |
| 18 | 8751628 | 8751866 | KD2-H4K8la_peak_3016 | 4.53273  |                                                         |
| 18 | 9803893 | 9804172 | KD2-H4K8la_peak_3017 | 8.76116  |                                                         |
| 18 | 1E+07   | 1E+07   | KD2-H4K8la_peak_3018 | 6.11881  | APCDD1_ENSG00000154856                                  |
| 18 | 1.3E+07 | 1.3E+07 | KD2-H4K8la_peak_3019 | 4.66473  | CEP76_ENSG00000101624                                   |
| 18 | 1.3E+07 | 1.3E+07 | KD2-H4K8la_peak_3020 | 8.07102  |                                                         |
| 18 | 1.3E+07 | 1.3E+07 | KD2-H4K8la_peak_3021 | 8.65116  |                                                         |
| 18 | 1.3E+07 | 1.3E+07 | KD2-H4K8la_peak_3022 | 7.55141  |                                                         |
| 18 | 1.3E+07 | 1.3E+07 | KD2-H4K8la_peak_3023 | 7.56395  | LDLRAD4_ENSG00000168675                                 |
| 18 | 1.4E+07 | 1.4E+07 | KD2-H4K8la_peak_3024 | 8.07102  | RP11-53B2.5_ENSG00000267366                             |
| 18 | 1.4E+07 | 1.4E+07 | KD2-H4K8la_peak_3025 | 8.37064  | FAM210A_ENSG00000177150;RNMT_ENSG00000101654            |
| 18 | 1.4E+07 | 1.4E+07 | KD2-H4K8la_peak_3026 | 9.0413   | ZNF519_ENSG00000175322                                  |
| 18 | 2.1E+07 | 2.1E+07 | KD2-H4K8la_peak_3027 | 6.71169  | RP11-17J14.2_ENSG00000266495                            |
| 18 | 2.1E+07 | 2.1E+07 | KD2-H4K8la_peak_3028 | 6.3399   | TMEM241_ENSG00000134490                                 |
| 18 | 2.1E+07 | 2.1E+07 | KD2-H4K8la_peak_3029 | 5.83285  |                                                         |
| 18 | 2.4E+07 | 2.4E+07 | KD2-H4K8la_peak_3030 | 11.40266 | KCTD1_ENSG00000134504;AQP4-AS1_ENSG00000260372          |
| 18 | 2.6E+07 | 2.6E+07 | KD2-H4K8la_peak_3031 | 4.30663  | CDH2_ENSG00000170558                                    |
| 18 | 2.9E+07 | 2.9E+07 | KD2-H4K8la_peak_3032 | 8.37064  | B4GALT6_ENSG00000118276;RP11-549B18.1_ENSG00000259985   |
| 18 | 3E+07   | 3E+07   | KD2-H4K8la_peak_3033 | 5.69935  | RP11-53I6.2_ENSG00000263917                             |
| 18 | 3.4E+07 | 3.4E+07 | KD2-H4K8la_peak_3034 | 11.28887 | SLC39A6_ENSG00000141424;ELP2_ENSG00000134759            |

|    |         |         |                      |          |                                                                                                  |
|----|---------|---------|----------------------|----------|--------------------------------------------------------------------------------------------------|
| 18 | 3.4E+07 | 3.4E+07 | KD2-H4K8la_peak_3035 | 8.43222  | FHOD3_ENSG00000134775                                                                            |
| 18 | 4.2E+07 | 4.2E+07 | KD2-H4K8la_peak_3036 | 8.8263   | RP11-456K23.1_ENSG00000267414;SETBP1_ENSG00000152217                                             |
| 18 | 4.2E+07 | 4.2E+07 | KD2-H4K8la_peak_3037 | 6.66491  |                                                                                                  |
| 18 | 4.6E+07 | 4.6E+07 | KD2-H4K8la_peak_3038 | 15.04077 |                                                                                                  |
| 18 | 4.6E+07 | 4.6E+07 | KD2-H4K8la_peak_3039 | 5.30989  |                                                                                                  |
| 18 | 4.6E+07 | 4.6E+07 | KD2-H4K8la_peak_3040 | 8.37064  |                                                                                                  |
| 18 | 4.6E+07 | 4.6E+07 | KD2-H4K8la_peak_3041 | 6.88801  |                                                                                                  |
| 18 | 4.6E+07 | 4.6E+07 | KD2-H4K8la_peak_3042 | 6.86458  |                                                                                                  |
| 18 | 4.6E+07 | 4.6E+07 | KD2-H4K8la_peak_3043 | 7.51014  |                                                                                                  |
| 18 | 4.6E+07 | 4.6E+07 | KD2-H4K8la_peak_3044 | 5.05146  |                                                                                                  |
| 18 | 4.7E+07 | 4.7E+07 | KD2-H4K8la_peak_3045 | 7.61975  |                                                                                                  |
| 18 | 4.7E+07 | 4.7E+07 | KD2-H4K8la_peak_3046 | 8.12466  |                                                                                                  |
| 18 | 4.7E+07 | 4.7E+07 | KD2-H4K8la_peak_3047 | 5.52913  | ACAA2_ENSG00000167315;SCARNA17_ENSG00000267322;SCARNA17_ENSG00000251992;SCARNA18_ENSG00000252139 |
| 18 | 4.8E+07 | 4.8E+07 | KD2-H4K8la_peak_3048 | 7.92775  | ELAC1_ENSG00000141642;RP11-729L2.2_ENSG00000267699;SMAD4_ENSG00000141646                         |
| 18 | 4.9E+07 | 4.9E+07 | KD2-H4K8la_peak_3049 | 11.77509 |                                                                                                  |
| 18 | 4.9E+07 | 4.9E+07 | KD2-H4K8la_peak_3050 | 7.60756  |                                                                                                  |
| 18 | 5.3E+07 | 5.3E+07 | KD2-H4K8la_peak_3051 | 7.12014  |                                                                                                  |
| 18 | 5.3E+07 | 5.3E+07 | KD2-H4K8la_peak_3052 | 5.33301  |                                                                                                  |
| 18 | 5.5E+07 | 5.5E+07 | KD2-H4K8la_peak_3053 | 5.72892  |                                                                                                  |
| 18 | 5.5E+07 | 5.5E+07 | KD2-H4K8la_peak_3054 | 5.83285  | RP11-35G9.3_ENSG00000267040                                                                      |
| 18 | 5.6E+07 | 5.6E+07 | KD2-H4K8la_peak_3055 | 13.20018 | RP11-126O1.5_ENSG00000267226;MALT1_ENSG00000172175                                               |
| 18 | 5.7E+07 | 5.7E+07 | KD2-H4K8la_peak_3056 | 12.74483 |                                                                                                  |
| 18 | 6.1E+07 | 6.1E+07 | KD2-H4K8la_peak_3057 | 10.36292 | VPS4B_ENSG00000119541                                                                            |
| 18 | 6.8E+07 | 6.8E+07 | KD2-H4K8la_peak_3058 | 7.12014  | SOCS6_ENSG00000170677                                                                            |
| 18 | 6.8E+07 | 6.8E+07 | KD2-H4K8la_peak_3059 | 12.1221  | SOCS6_ENSG00000170677                                                                            |
| 18 | 6.8E+07 | 6.8E+07 | KD2-H4K8la_peak_3060 | 4.60523  |                                                                                                  |
| 18 | 7.2E+07 | 7.2E+07 | KD2-H4K8la_peak_3061 | 8.487    | FBXO15_ENSG00000141665;TIMM21_ENSG00000075336                                                    |
| 18 | 7.2E+07 | 7.2E+07 | KD2-H4K8la_peak_3062 | 8.30878  |                                                                                                  |
| 18 | 7.2E+07 | 7.2E+07 | KD2-H4K8la_peak_3063 | 6.11881  | LINC00909_ENSG00000264247;ZNF407_ENSG00000215421                                                 |
| 18 | 7.3E+07 | 7.3E+07 | KD2-H4K8la_peak_3064 | 9.38376  |                                                                                                  |
| 18 | 7.4E+07 | 7.4E+07 | KD2-H4K8la_peak_3065 | 10.99007 |                                                                                                  |
| 18 | 7.5E+07 | 7.5E+07 | KD2-H4K8la_peak_3066 | 7.12014  | RNU6-346P_ENSG00000252097                                                                        |
| 18 | 7.5E+07 | 7.5E+07 | KD2-H4K8la_peak_3067 | 6.64804  | RP11-162A12.2_ENSG00000264278;ZNF236_ENSG00000130856                                             |
| 18 | 7.5E+07 | 7.5E+07 | KD2-H4K8la_peak_3068 | 8.76116  | RP11-162A12.2_ENSG00000264278;ZNF236_ENSG00000130856                                             |
| 18 | 7.7E+07 | 7.7E+07 | KD2-H4K8la_peak_3069 | 8.43222  | ATP9B_ENSG00000166377                                                                            |
| 18 | 7.7E+07 | 7.7E+07 | KD2-H4K8la_peak_3070 | 6.13507  | ATP9B_ENSG00000166377                                                                            |
| 18 | 7.8E+07 | 7.8E+07 | KD2-H4K8la_peak_3071 | 6.3399   | PQLC1_ENSG00000122490                                                                            |
| 18 | 7.8E+07 | 7.8E+07 | KD2-H4K8la_peak_3072 | 6.89612  | HSBP1L1_ENSG00000226742                                                                          |
| 19 | 290924  | 291181  | KD2-H4K8la_peak_3073 | 5.83285  | PPAP2C_ENSG00000141934                                                                           |
| 19 | 291728  | 291975  | KD2-H4K8la_peak_3074 | 8.37064  | PPAP2C_ENSG00000141934                                                                           |
| 19 | 344986  | 345183  | KD2-H4K8la_peak_3075 | 8.37064  | MIER2_ENSG00000105556                                                                            |
| 19 | 402367  | 402601  | KD2-H4K8la_peak_3076 | 6.2278   |                                                                                                  |
| 19 | 448129  | 448355  | KD2-H4K8la_peak_3077 | 9.73848  |                                                                                                  |
| 19 | 524232  | 524723  | KD2-H4K8la_peak_3078 | 11.60966 |                                                                                                  |
| 19 | 662809  | 663055  | KD2-H4K8la_peak_3079 | 6.20477  | RNF126_ENSG00000070423;AC004156.3_ENSG00000267666                                                |
| 19 | 679522  | 679827  | KD2-H4K8la_peak_3080 | 6.95378  |                                                                                                  |

|    |         |         |                      |          |                                                 |
|----|---------|---------|----------------------|----------|-------------------------------------------------|
| 19 | 680092  | 680299  | KD2-H4K8la_peak_3081 | 10.49982 |                                                 |
| 19 | 719647  | 719979  | KD2-H4K8la_peak_3082 | 8.07102  |                                                 |
| 19 | 720765  | 721113  | KD2-H4K8la_peak_3083 | 4.75945  |                                                 |
| 19 | 789157  | 789646  | KD2-H4K8la_peak_3084 | 10.02595 |                                                 |
| 19 | 796163  | 796871  | KD2-H4K8la_peak_3085 | 14.22324 | PTBP1_ENSG00000011304                           |
| 19 | 821539  | 822728  | KD2-H4K8la_peak_3086 | 8.79494  | LPPR3_ENSG000000129951                          |
| 19 | 924895  | 925396  | KD2-H4K8la_peak_3087 | 10.36292 | ARID3A_ENSG000000116017                         |
| 19 | 932840  | 933127  | KD2-H4K8la_peak_3088 | 8.37064  |                                                 |
| 19 | 1074394 | 1074659 | KD2-H4K8la_peak_3089 | 7.23932  |                                                 |
| 19 | 1180528 | 1180806 | KD2-H4K8la_peak_3090 | 6.39623  |                                                 |
| 19 | 1205236 | 1205452 | KD2-H4K8la_peak_3091 | 8.00569  |                                                 |
| 19 | 1239706 | 1240049 | KD2-H4K8la_peak_3092 | 12.32641 |                                                 |
| 19 | 1261742 | 1261952 | KD2-H4K8la_peak_3093 | 5.86882  |                                                 |
| 19 | 1269358 | 1269589 | KD2-H4K8la_peak_3094 | 14.71706 | CIRBP-AS1_ENSG000000267493                      |
| 19 | 1275530 | 1275815 | KD2-H4K8la_peak_3095 | 22.92734 | C19orf24_ENSG000000228300                       |
| 19 | 1285385 | 1285604 | KD2-H4K8la_peak_3096 | 5.84385  | MUM1_ENSG000000160953;EFNA2_ENSG000000099617    |
| 19 | 1354513 | 1354741 | KD2-H4K8la_peak_3097 | 8.39919  |                                                 |
| 19 | 1444766 | 1445087 | KD2-H4K8la_peak_3098 | 5.83285  |                                                 |
| 19 | 1446298 | 1446506 | KD2-H4K8la_peak_3099 | 7.61975  | APC2_ENSG000000115266                           |
| 19 | 1479590 | 1479994 | KD2-H4K8la_peak_3100 | 9.00481  | C19orf25_ENSG000000119559                       |
| 19 | 1567349 | 1567588 | KD2-H4K8la_peak_3101 | 7.30722  | MEX3D_ENSG000000181588                          |
| 19 | 1605018 | 1605304 | KD2-H4K8la_peak_3102 | 7.12014  | UQCR11_ENSG000000267059;UQCR11_ENSG000000127540 |
| 19 | 1725377 | 1725586 | KD2-H4K8la_peak_3103 | 6.86458  |                                                 |
| 19 | 1811962 | 1812186 | KD2-H4K8la_peak_3104 | 7.10162  | ATP8B3_ENSG000000130270                         |
| 19 | 1847961 | 1848662 | KD2-H4K8la_peak_3105 | 12.07697 | REXO1_ENSG000000079313                          |
| 19 | 1876486 | 1876788 | KD2-H4K8la_peak_3106 | 9.0516   | CTB-31O20.2_ENSG000000261526                    |
| 19 | 2016319 | 2016543 | KD2-H4K8la_peak_3107 | 5.83285  |                                                 |
| 19 | 2042740 | 2043039 | KD2-H4K8la_peak_3108 | 5.63442  |                                                 |
| 19 | 2051495 | 2051884 | KD2-H4K8la_peak_3109 | 13.27013 | MKNK2_ENSG000000099875                          |
| 19 | 2052152 | 2052368 | KD2-H4K8la_peak_3110 | 5.05146  | MKNK2_ENSG000000099875                          |
| 19 | 2056310 | 2056550 | KD2-H4K8la_peak_3111 | 9.52279  |                                                 |
| 19 | 2060526 | 2061220 | KD2-H4K8la_peak_3112 | 8.89364  |                                                 |
| 19 | 2061866 | 2062495 | KD2-H4K8la_peak_3113 | 12.85404 |                                                 |
| 19 | 2235944 | 2236195 | KD2-H4K8la_peak_3114 | 7.83588  | SF3A2_ENSG000000104897                          |
| 19 | 2328768 | 2329023 | KD2-H4K8la_peak_3115 | 9.37943  | LSM7_ENSG000000130332;SPPL2B_ENSG000000005206   |
| 19 | 2427231 | 2427486 | KD2-H4K8la_peak_3116 | 10.90862 | TIMM13_ENSG000000099800                         |
| 19 | 2456525 | 2456829 | KD2-H4K8la_peak_3117 | 8.16787  | LMNB2_ENSG000000176619                          |
| 19 | 2461807 | 2462037 | KD2-H4K8la_peak_3118 | 5.52913  | AC005624.2_ENSG000000267201                     |
| 19 | 2462830 | 2463059 | KD2-H4K8la_peak_3119 | 8.33785  | AC005624.2_ENSG000000267201                     |
| 19 | 2543147 | 2543424 | KD2-H4K8la_peak_3120 | 11.06859 |                                                 |
| 19 | 2820054 | 2820300 | KD2-H4K8la_peak_3121 | 6.3399   | ZNF554_ENSG000000172006                         |
| 19 | 2866709 | 2866933 | KD2-H4K8la_peak_3122 | 5.36015  | ZNF556_ENSG000000172000                         |
| 19 | 2867338 | 2867606 | KD2-H4K8la_peak_3123 | 7.13237  | ZNF556_ENSG000000172000                         |
| 19 | 2983437 | 2983643 | KD2-H4K8la_peak_3124 | 4.75924  |                                                 |
| 19 | 3062593 | 3062857 | KD2-H4K8la_peak_3125 | 8.59561  | AES_ENSG000000104964                            |
| 19 | 3358915 | 3359262 | KD2-H4K8la_peak_3126 | 9.27415  | NFIC_ENSG000000141905                           |

|    |         |         |                      |          |                                                                     |
|----|---------|---------|----------------------|----------|---------------------------------------------------------------------|
| 19 | 3367641 | 3367911 | KD2-H4K8la_peak_3127 | 9.11321  |                                                                     |
| 19 | 3434293 | 3434736 | KD2-H4K8la_peak_3128 | 6.97699  |                                                                     |
| 19 | 3441377 | 3441705 | KD2-H4K8la_peak_3129 | 6.13507  |                                                                     |
| 19 | 3442822 | 3443025 | KD2-H4K8la_peak_3130 | 9.60611  |                                                                     |
| 19 | 3501321 | 3501534 | KD2-H4K8la_peak_3131 | 7.49467  | DOHH_ENSG00000129932;RN7SL866P_ENSG00000264159                      |
| 19 | 3505623 | 3505897 | KD2-H4K8la_peak_3132 | 7.75048  | FZR1_ENSG00000105325                                                |
| 19 | 3506474 | 3506752 | KD2-H4K8la_peak_3133 | 5.57469  | FZR1_ENSG00000105325                                                |
| 19 | 3607097 | 3607298 | KD2-H4K8la_peak_3134 | 7.30722  | TBXA2R_ENSG00000006638;CACTIN-AS1_ENSG00000226800                   |
| 19 | 3985053 | 3985424 | KD2-H4K8la_peak_3135 | 6.36118  | EEF2_ENSG00000167658                                                |
| 19 | 4007828 | 4008070 | KD2-H4K8la_peak_3136 | 7.22716  | PIAS4_ENSG00000105229                                               |
| 19 | 4066399 | 4066751 | KD2-H4K8la_peak_3137 | 13.63083 | ZBTB7A_ENSG00000178951                                              |
| 19 | 4140577 | 4141080 | KD2-H4K8la_peak_3138 | 6.26214  |                                                                     |
| 19 | 4182051 | 4182489 | KD2-H4K8la_peak_3139 | 4.66473  | SIRT6_ENSG00000077463;ANKRD24_ENSG00000089847                       |
| 19 | 4246230 | 4246781 | KD2-H4K8la_peak_3140 | 10.74378 | CCDC94_ENSG00000105248                                              |
| 19 | 4277684 | 4278435 | KD2-H4K8la_peak_3141 | 8.24908  | SHD_ENSG00000105251                                                 |
| 19 | 4279397 | 4280426 | KD2-H4K8la_peak_3142 | 7.61975  | SHD_ENSG00000105251                                                 |
| 19 | 4342177 | 4342648 | KD2-H4K8la_peak_3143 | 8.73956  | STAP2_ENSG00000178078;MPND_ENSG00000008382                          |
| 19 | 4402718 | 4403130 | KD2-H4K8la_peak_3144 | 11.87032 | CHAF1A_ENSG00000167670                                              |
| 19 | 4670713 | 4671093 | KD2-H4K8la_peak_3145 | 7.92775  | C19orf10_ENSG00000074842                                            |
| 19 | 4723500 | 4723773 | KD2-H4K8la_peak_3146 | 6.86458  | DPP9_ENSG00000142002                                                |
| 19 | 4815409 | 4815614 | KD2-H4K8la_peak_3147 | 7.49467  |                                                                     |
| 19 | 4816067 | 4816858 | KD2-H4K8la_peak_3148 | 15.10098 |                                                                     |
| 19 | 4908993 | 4909295 | KD2-H4K8la_peak_3149 | 9.0516   |                                                                     |
| 19 | 5107813 | 5108136 | KD2-H4K8la_peak_3150 | 6.16608  |                                                                     |
| 19 | 5340378 | 5340630 | KD2-H4K8la_peak_3151 | 7.61975  | PTPRS_ENSG00000105426                                               |
| 19 | 5437065 | 5437273 | KD2-H4K8la_peak_3152 | 7.13237  |                                                                     |
| 19 | 5772864 | 5773411 | KD2-H4K8la_peak_3153 | 7.30722  |                                                                     |
| 19 | 5827326 | 5827559 | KD2-H4K8la_peak_3154 | 6.96161  |                                                                     |
| 19 | 5994563 | 5994987 | KD2-H4K8la_peak_3155 | 5.43278  |                                                                     |
| 19 | 6361626 | 6361883 | KD2-H4K8la_peak_3156 | 7.12014  | CTB-180A7.3_ENSG00000269802;CLPP_ENSG00000125656                    |
| 19 | 6424419 | 6424621 | KD2-H4K8la_peak_3157 | 7.01227  | KHSRP_ENSG00000088247                                               |
| 19 | 6504542 | 6504768 | KD2-H4K8la_peak_3158 | 7.1623   |                                                                     |
| 19 | 6739207 | 6739447 | KD2-H4K8la_peak_3159 | 10.90862 |                                                                     |
| 19 | 7433187 | 7433448 | KD2-H4K8la_peak_3160 | 7.09021  |                                                                     |
| 19 | 7558831 | 7559226 | KD2-H4K8la_peak_3161 | 13.20018 | C19orf45_ENSG00000198723                                            |
| 19 | 7580169 | 7580449 | KD2-H4K8la_peak_3162 | 8.86558  | ZNF358_ENSG00000198816                                              |
| 19 | 7581201 | 7581556 | KD2-H4K8la_peak_3163 | 13.40081 |                                                                     |
| 19 | 7598367 | 7598579 | KD2-H4K8la_peak_3164 | 11.36807 | CTD-2207O23.10_ENSG00000268614;PNPLA6_ENSG00000032444               |
| 19 | 7600790 | 7601136 | KD2-H4K8la_peak_3165 | 8.39919  |                                                                     |
| 19 | 7615686 | 7615907 | KD2-H4K8la_peak_3166 | 7.97203  |                                                                     |
| 19 | 7684570 | 7684997 | KD2-H4K8la_peak_3167 | 5.99671  |                                                                     |
| 19 | 7745344 | 7745579 | KD2-H4K8la_peak_3168 | 5.83285  | TRAPPC5_ENSG00000181029                                             |
| 19 | 7745816 | 7746073 | KD2-H4K8la_peak_3169 | 5.52913  | TRAPPC5_ENSG00000181029                                             |
| 19 | 8008278 | 8008475 | KD2-H4K8la_peak_3170 | 6.89612  | TIMM44_ENSG00000104980                                              |
| 19 | 8273505 | 8273764 | KD2-H4K8la_peak_3171 | 7.49467  |                                                                     |
| 19 | 8385892 | 8386090 | KD2-H4K8la_peak_3172 | 6.68593  | NDUFA7_ENSG00000167774;NDUFA7_ENSG00000267855;RPS28_ENSG00000233927 |

|    |         |         |                      |          |                                                                      |
|----|---------|---------|----------------------|----------|----------------------------------------------------------------------|
| 19 | 8455348 | 8455553 | KD2-H4K8la_peak_3173 | 8.39919  | RAB11B-AS1_ENSG00000269386;RAB11B_ENSG00000185236                    |
| 19 | 8570647 | 8571045 | KD2-H4K8la_peak_3174 | 7.8597   |                                                                      |
| 19 | 8577992 | 8578569 | KD2-H4K8la_peak_3175 | 9.98668  | ZNF414_ENSG00000133250                                               |
| 19 | 9517340 | 9517715 | KD2-H4K8la_peak_3176 | 8.65116  |                                                                      |
| 19 | 9546393 | 9546854 | KD2-H4K8la_peak_3177 | 8.86558  | ZNF266_ENSG00000174652                                               |
| 19 | 9648850 | 9649538 | KD2-H4K8la_peak_3178 | 11.20575 | ZNF426_ENSG00000130818                                               |
| 19 | 9649855 | 9650060 | KD2-H4K8la_peak_3179 | 9.38376  | ZNF426_ENSG00000130818                                               |
| 19 | 9786296 | 9786531 | KD2-H4K8la_peak_3180 | 11.5908  | ZNF562_ENSG00000171466                                               |
| 19 | 1E+07   | 1E+07   | KD2-H4K8la_peak_3181 | 6.07357  |                                                                      |
| 19 | 1E+07   | 1E+07   | KD2-H4K8la_peak_3182 | 8.94515  | C19orf66_ENSG00000130813                                             |
| 19 | 1E+07   | 1E+07   | KD2-H4K8la_peak_3183 | 8.12466  | PPAN-P2RY11_ENSG00000243207;PPAN_ENSG00000130810                     |
| 19 | 1E+07   | 1E+07   | KD2-H4K8la_peak_3184 | 10.02595 | TYK2_ENSG00000105397                                                 |
| 19 | 1.1E+07 | 1.1E+07 | KD2-H4K8la_peak_3185 | 7.65547  |                                                                      |
| 19 | 1.1E+07 | 1.1E+07 | KD2-H4K8la_peak_3186 | 7.23932  |                                                                      |
| 19 | 1.1E+07 | 1.1E+07 | KD2-H4K8la_peak_3187 | 6.68593  |                                                                      |
| 19 | 1.1E+07 | 1.1E+07 | KD2-H4K8la_peak_3188 | 9.20163  | KEAP1_ENSG00000079999                                                |
| 19 | 1.1E+07 | 1.1E+07 | KD2-H4K8la_peak_3189 | 5.05146  | CARM1_ENSG00000142453                                                |
| 19 | 1.1E+07 | 1.1E+07 | KD2-H4K8la_peak_3190 | 8.78735  | SMARCA4_ENSG00000127616                                              |
| 19 | 1.1E+07 | 1.1E+07 | KD2-H4K8la_peak_3191 | 4.86896  |                                                                      |
| 19 | 1.1E+07 | 1.1E+07 | KD2-H4K8la_peak_3192 | 5.51108  | CTC-510F12.2_ENSG00000267082                                         |
| 19 | 1.1E+07 | 1.1E+07 | KD2-H4K8la_peak_3193 | 5.22084  | DKFZP761J1410_ENSG00000105520                                        |
| 19 | 1.2E+07 | 1.2E+07 | KD2-H4K8la_peak_3194 | 7.13237  |                                                                      |
| 19 | 1.2E+07 | 1.2E+07 | KD2-H4K8la_peak_3195 | 14.30153 | ZNF700_ENSG00000196757;ZNF763_ENSG00000197054;ZNF763_ENSG00000267179 |
| 19 | 1.2E+07 | 1.2E+07 | KD2-H4K8la_peak_3196 | 5.33301  | ZNF563_ENSG00000188868                                               |
| 19 | 1.3E+07 | 1.3E+07 | KD2-H4K8la_peak_3197 | 9.27415  |                                                                      |
| 19 | 1.3E+07 | 1.3E+07 | KD2-H4K8la_peak_3198 | 9.15019  | ZNF490_ENSG00000188033                                               |
| 19 | 1.3E+07 | 1.3E+07 | KD2-H4K8la_peak_3199 | 7.54643  | DHPS_ENSG00000095059                                                 |
| 19 | 1.3E+07 | 1.3E+07 | KD2-H4K8la_peak_3200 | 5.468    | ASNA1_ENSG00000198356                                                |
| 19 | 1.3E+07 | 1.3E+07 | KD2-H4K8la_peak_3201 | 9.61894  |                                                                      |
| 19 | 1.3E+07 | 1.3E+07 | KD2-H4K8la_peak_3202 | 6.61576  |                                                                      |
| 19 | 1.3E+07 | 1.3E+07 | KD2-H4K8la_peak_3203 | 9.73848  | RNASEH2A_ENSG00000104889                                             |
| 19 | 1.3E+07 | 1.3E+07 | KD2-H4K8la_peak_3204 | 5.33301  | MAST1_ENSG00000105613                                                |
| 19 | 1.3E+07 | 1.3E+07 | KD2-H4K8la_peak_3205 | 8.07102  | SYCE2_ENSG00000161860                                                |
| 19 | 1.3E+07 | 1.3E+07 | KD2-H4K8la_peak_3206 | 7.59044  | FARSA_ENSG00000179115                                                |
| 19 | 1.3E+07 | 1.3E+07 | KD2-H4K8la_peak_3207 | 10.20357 | GADD45GIP1_ENSG00000179271                                           |
| 19 | 1.3E+07 | 1.3E+07 | KD2-H4K8la_peak_3208 | 9.87983  |                                                                      |
| 19 | 1.3E+07 | 1.3E+07 | KD2-H4K8la_peak_3209 | 11.52725 |                                                                      |
| 19 | 1.3E+07 | 1.3E+07 | KD2-H4K8la_peak_3210 | 5.33301  |                                                                      |
| 19 | 1.3E+07 | 1.3E+07 | KD2-H4K8la_peak_3211 | 4.44412  |                                                                      |
| 19 | 1.3E+07 | 1.3E+07 | KD2-H4K8la_peak_3212 | 9.5329   |                                                                      |
| 19 | 1.3E+07 | 1.3E+07 | KD2-H4K8la_peak_3213 | 6.98743  |                                                                      |
| 19 | 1.3E+07 | 1.3E+07 | KD2-H4K8la_peak_3214 | 8.43222  | LYL1_ENSG00000104903                                                 |
| 19 | 1.3E+07 | 1.3E+07 | KD2-H4K8la_peak_3215 | 9.19986  |                                                                      |
| 19 | 1.3E+07 | 1.3E+07 | KD2-H4K8la_peak_3216 | 7.61975  |                                                                      |
| 19 | 1.3E+07 | 1.3E+07 | KD2-H4K8la_peak_3217 | 5.36015  |                                                                      |
| 19 | 1.4E+07 | 1.4E+07 | KD2-H4K8la_peak_3218 | 11.15182 | ZSWIM4_ENSG00000132003                                               |

|    |         |         |                      |          |                                                                           |
|----|---------|---------|----------------------|----------|---------------------------------------------------------------------------|
| 19 | 1.4E+07 | 1.4E+07 | KD2-H4K8la_peak_3219 | 6.57426  |                                                                           |
| 19 | 1.4E+07 | 1.4E+07 | KD2-H4K8la_peak_3220 | 9.63836  |                                                                           |
| 19 | 1.4E+07 | 1.4E+07 | KD2-H4K8la_peak_3221 | 7.22716  |                                                                           |
| 19 | 1.4E+07 | 1.4E+07 | KD2-H4K8la_peak_3222 | 11.15747 |                                                                           |
| 19 | 1.4E+07 | 1.4E+07 | KD2-H4K8la_peak_3223 | 4.30663  |                                                                           |
| 19 | 1.4E+07 | 1.4E+07 | KD2-H4K8la_peak_3224 | 11.77509 | NANOS3_ENSG00000187556                                                    |
| 19 | 1.4E+07 | 1.4E+07 | KD2-H4K8la_peak_3225 | 13.29476 |                                                                           |
| 19 | 1.4E+07 | 1.4E+07 | KD2-H4K8la_peak_3226 | 6.3399   |                                                                           |
| 19 | 1.4E+07 | 1.4E+07 | KD2-H4K8la_peak_3227 | 7.51302  |                                                                           |
| 19 | 1.4E+07 | 1.4E+07 | KD2-H4K8la_peak_3228 | 6.25288  | RFX1_ENSG00000132005                                                      |
| 19 | 1.4E+07 | 1.4E+07 | KD2-H4K8la_peak_3229 | 9.0516   | SAMD1_ENSG00000141858                                                     |
| 19 | 1.4E+07 | 1.4E+07 | KD2-H4K8la_peak_3230 | 7.01227  | PRKACA_ENSG00000072062;CTB-55O6.10_ENSG00000267783                        |
| 19 | 1.4E+07 | 1.4E+07 | KD2-H4K8la_peak_3231 | 10.62798 |                                                                           |
| 19 | 1.4E+07 | 1.4E+07 | KD2-H4K8la_peak_3232 | 10.49982 |                                                                           |
| 19 | 1.4E+07 | 1.4E+07 | KD2-H4K8la_peak_3233 | 10.20357 |                                                                           |
| 19 | 1.4E+07 | 1.4E+07 | KD2-H4K8la_peak_3234 | 10.00612 |                                                                           |
| 19 | 1.5E+07 | 1.5E+07 | KD2-H4K8la_peak_3235 | 13.13367 | DDX39A_ENSG00000123136                                                    |
| 19 | 1.5E+07 | 1.5E+07 | KD2-H4K8la_peak_3236 | 8.44557  | PKN1_ENSG00000123143                                                      |
| 19 | 1.5E+07 | 1.5E+07 | KD2-H4K8la_peak_3237 | 5.90392  |                                                                           |
| 19 | 1.5E+07 | 1.5E+07 | KD2-H4K8la_peak_3238 | 9.73848  | DNAJB1_ENSG00000132002;MIR639_ENSG00000207707                             |
| 19 | 1.5E+07 | 1.5E+07 | KD2-H4K8la_peak_3239 | 6.64804  | BRD4_ENSG00000141867                                                      |
| 19 | 1.6E+07 | 1.6E+07 | KD2-H4K8la_peak_3240 | 7.92775  | WIZ_ENSG00000011451;MIR1470_ENSG00000269782                               |
| 19 | 1.6E+07 | 1.6E+07 | KD2-H4K8la_peak_3241 | 7.61975  |                                                                           |
| 19 | 1.6E+07 | 1.6E+07 | KD2-H4K8la_peak_3242 | 4.30663  |                                                                           |
| 19 | 1.6E+07 | 1.6E+07 | KD2-H4K8la_peak_3243 | 10.00612 | RAB8A_ENSG00000167461                                                     |
| 19 | 1.6E+07 | 1.6E+07 | KD2-H4K8la_peak_3244 | 7.30722  | RAB8A_ENSG00000167461                                                     |
| 19 | 1.6E+07 | 1.6E+07 | KD2-H4K8la_peak_3245 | 12.13455 | FAM32A_ENSG00000105058                                                    |
| 19 | 1.7E+07 | 1.7E+07 | KD2-H4K8la_peak_3246 | 5.90392  | CTC-429P9.4_ENSG00000268790;SMIM7_ENSG00000214046;TMEM38A_ENSG00000072954 |
| 19 | 1.7E+07 | 1.7E+07 | KD2-H4K8la_peak_3247 | 4.73646  |                                                                           |
| 19 | 1.7E+07 | 1.7E+07 | KD2-H4K8la_peak_3248 | 7.51014  | USE1_ENSG00000053501                                                      |
| 19 | 1.7E+07 | 1.7E+07 | KD2-H4K8la_peak_3249 | 4.86896  | OCEL1_ENSG00000099330                                                     |
| 19 | 1.7E+07 | 1.7E+07 | KD2-H4K8la_peak_3250 | 8.22219  | NR2F6_ENSG00000160113                                                     |
| 19 | 1.7E+07 | 1.7E+07 | KD2-H4K8la_peak_3251 | 13.13367 |                                                                           |
| 19 | 1.7E+07 | 1.7E+07 | KD2-H4K8la_peak_3252 | 7.38202  |                                                                           |
| 19 | 1.8E+07 | 1.8E+07 | KD2-H4K8la_peak_3253 | 9.27415  |                                                                           |
| 19 | 1.8E+07 | 1.8E+07 | KD2-H4K8la_peak_3254 | 4.75945  | CTD-2521M24.8_ENSG00000269053                                             |
| 19 | 1.8E+07 | 1.8E+07 | KD2-H4K8la_peak_3255 | 5.83285  | UNC13A_ENSG00000130477                                                    |
| 19 | 1.8E+07 | 1.8E+07 | KD2-H4K8la_peak_3256 | 6.72794  | JAK3_ENSG00000105639                                                      |
| 19 | 1.8E+07 | 1.8E+07 | KD2-H4K8la_peak_3257 | 6.86458  | RPL18A_ENSG00000105640                                                    |
| 19 | 1.8E+07 | 1.8E+07 | KD2-H4K8la_peak_3258 | 6.89612  | KCNN1_ENSG00000105642                                                     |
| 19 | 1.8E+07 | 1.8E+07 | KD2-H4K8la_peak_3259 | 7.51302  |                                                                           |
| 19 | 1.8E+07 | 1.8E+07 | KD2-H4K8la_peak_3260 | 11.77509 |                                                                           |
| 19 | 1.8E+07 | 1.8E+07 | KD2-H4K8la_peak_3261 | 8.89364  |                                                                           |
| 19 | 1.8E+07 | 1.8E+07 | KD2-H4K8la_peak_3262 | 8.50453  |                                                                           |
| 19 | 1.8E+07 | 1.8E+07 | KD2-H4K8la_peak_3263 | 8.89364  |                                                                           |
| 19 | 1.8E+07 | 1.8E+07 | KD2-H4K8la_peak_3264 | 6.13507  | JUND_ENSG00000130522;MIR3188_ENSG00000267959                              |

|    |         |         |                      |          |                                                                                                   |
|----|---------|---------|----------------------|----------|---------------------------------------------------------------------------------------------------|
| 19 | 1.8E+07 | 1.8E+07 | KD2-H4K8la_peak_3265 | 10.49982 |                                                                                                   |
| 19 | 1.8E+07 | 1.8E+07 | KD2-H4K8la_peak_3266 | 12.49088 |                                                                                                   |
| 19 | 1.8E+07 | 1.8E+07 | KD2-H4K8la_peak_3267 | 6.86458  |                                                                                                   |
| 19 | 1.8E+07 | 1.8E+07 | KD2-H4K8la_peak_3268 | 6.61963  |                                                                                                   |
| 19 | 1.9E+07 | 1.9E+07 | KD2-H4K8la_peak_3269 | 5.66328  | SSBP4_ENSG00000130511                                                                             |
| 19 | 1.9E+07 | 1.9E+07 | KD2-H4K8la_peak_3270 | 9.61894  |                                                                                                   |
| 19 | 1.9E+07 | 1.9E+07 | KD2-H4K8la_peak_3271 | 6.64804  |                                                                                                   |
| 19 | 1.9E+07 | 1.9E+07 | KD2-H4K8la_peak_3272 | 7.41484  | FKBP8_ENSG00000105701                                                                             |
| 19 | 1.9E+07 | 1.9E+07 | KD2-H4K8la_peak_3273 | 10.89081 | C19orf60_ENSG00000006015                                                                          |
| 19 | 1.9E+07 | 1.9E+07 | KD2-H4K8la_peak_3274 | 9.61894  | CRTC1_ENSG00000105662                                                                             |
| 19 | 1.9E+07 | 1.9E+07 | KD2-H4K8la_peak_3275 | 10.00612 |                                                                                                   |
| 19 | 1.9E+07 | 1.9E+07 | KD2-H4K8la_peak_3276 | 7.61975  |                                                                                                   |
| 19 | 1.9E+07 | 1.9E+07 | KD2-H4K8la_peak_3277 | 6.96161  | SUGP2_ENSG00000064607;ARMC6_ENSG00000105676                                                       |
| 19 | 1.9E+07 | 1.9E+07 | KD2-H4K8la_peak_3278 | 8.76116  | SUGP1_ENSG00000105705;MAU2_ENSG00000129933                                                        |
| 19 | 2E+07   | 2E+07   | KD2-H4K8la_peak_3279 | 4.69635  | TSSK6_ENSG00000178093;NDUFA13_ENSG00000186010;YJEFN3_ENSG00000250067;CTC-260F20.3_ENSG00000258674 |
| 19 | 2E+07   | 2E+07   | KD2-H4K8la_peak_3280 | 9.05604  | GMIP_ENSG00000089639                                                                              |
| 19 | 2E+07   | 2E+07   | KD2-H4K8la_peak_3281 | 6.88801  |                                                                                                   |
| 19 | 2.1E+07 | 2.1E+07 | KD2-H4K8la_peak_3282 | 11.70864 | ZNF826P_ENSG00000231205                                                                           |
| 19 | 2.3E+07 | 2.3E+07 | KD2-H4K8la_peak_3283 | 6.2278   | CTD-2291D10.4_ENSG00000267886;ZNF730_ENSG00000183850                                              |
| 19 | 3E+07   | 3E+07   | KD2-H4K8la_peak_3284 | 7.33892  |                                                                                                   |
| 19 | 3.1E+07 | 3.1E+07 | KD2-H4K8la_peak_3285 | 4.53273  |                                                                                                   |
| 19 | 3.1E+07 | 3.1E+07 | KD2-H4K8la_peak_3286 | 7.81267  |                                                                                                   |
| 19 | 3.1E+07 | 3.1E+07 | KD2-H4K8la_peak_3287 | 6.86458  |                                                                                                   |
| 19 | 3.1E+07 | 3.1E+07 | KD2-H4K8la_peak_3288 | 7.34033  |                                                                                                   |
| 19 | 3.1E+07 | 3.1E+07 | KD2-H4K8la_peak_3289 | 7.8597   |                                                                                                   |
| 19 | 3.1E+07 | 3.1E+07 | KD2-H4K8la_peak_3290 | 4.30663  |                                                                                                   |
| 19 | 3.1E+07 | 3.1E+07 | KD2-H4K8la_peak_3291 | 5.83285  |                                                                                                   |
| 19 | 3.2E+07 | 3.2E+07 | KD2-H4K8la_peak_3292 | 5.6499   |                                                                                                   |
| 19 | 3.3E+07 | 3.3E+07 | KD2-H4K8la_peak_3293 | 7.19298  | ZNF507_ENSG00000168813                                                                            |
| 19 | 3.3E+07 | 3.3E+07 | KD2-H4K8la_peak_3294 | 8.07102  | CTD-2538C1.2_ENSG00000267475;NUDT19_ENSG00000213965                                               |
| 19 | 3.3E+07 | 3.3E+07 | KD2-H4K8la_peak_3295 | 6.2278   | CTD-2085J24.5_ENSG00000267245                                                                     |
| 19 | 3.4E+07 | 3.4E+07 | KD2-H4K8la_peak_3296 | 9.6708   |                                                                                                   |
| 19 | 3.4E+07 | 3.4E+07 | KD2-H4K8la_peak_3297 | 9.11321  | CEBPG_ENSG00000153879                                                                             |
| 19 | 3.4E+07 | 3.4E+07 | KD2-H4K8la_peak_3298 | 8.8293   |                                                                                                   |
| 19 | 3.4E+07 | 3.4E+07 | KD2-H4K8la_peak_3299 | 7.61975  |                                                                                                   |
| 19 | 3.5E+07 | 3.5E+07 | KD2-H4K8la_peak_3300 | 9.0413   |                                                                                                   |
| 19 | 3.5E+07 | 3.5E+07 | KD2-H4K8la_peak_3301 | 6.60114  |                                                                                                   |
| 19 | 3.5E+07 | 3.5E+07 | KD2-H4K8la_peak_3302 | 11.69149 | LSM14A_ENSG00000257103                                                                            |
| 19 | 3.5E+07 | 3.5E+07 | KD2-H4K8la_peak_3303 | 5.67034  |                                                                                                   |
| 19 | 3.5E+07 | 3.5E+07 | KD2-H4K8la_peak_3304 | 6.2278   | CTD-2588C8.8_ENSG00000267024;UBA2_ENSG00000126261                                                 |
| 19 | 3.5E+07 | 3.5E+07 | KD2-H4K8la_peak_3305 | 5.36015  | ZNF181_ENSG00000197841                                                                            |
| 19 | 3.5E+07 | 3.5E+07 | KD2-H4K8la_peak_3306 | 9.11321  | ZNF181_ENSG00000197841                                                                            |
| 19 | 3.5E+07 | 3.5E+07 | KD2-H4K8la_peak_3307 | 6.57319  | ZNF599_ENSG00000153896                                                                            |
| 19 | 3.5E+07 | 3.5E+07 | KD2-H4K8la_peak_3308 | 4.38865  | CTD-2527I21.7_ENSG00000269303                                                                     |
| 19 | 3.6E+07 | 3.6E+07 | KD2-H4K8la_peak_3309 | 7.90495  |                                                                                                   |
| 19 | 3.6E+07 | 3.6E+07 | KD2-H4K8la_peak_3310 | 8.37064  |                                                                                                   |



|    |         |         |                      |          |                                                                                                      |
|----|---------|---------|----------------------|----------|------------------------------------------------------------------------------------------------------|
| 19 | 3.6E+07 | 3.6E+07 | KD2-H4K8la_peak_3311 | 12.166   | USF2_ENSG00000105698                                                                                 |
| 19 | 3.6E+07 | 3.6E+07 | KD2-H4K8la_peak_3312 | 7.65547  | RBM42_ENSG00000126254                                                                                |
| 19 | 3.6E+07 | 3.6E+07 | KD2-H4K8la_peak_3313 | 5.05146  |                                                                                                      |
| 19 | 3.6E+07 | 3.6E+07 | KD2-H4K8la_peak_3314 | 4.69635  |                                                                                                      |
| 19 | 3.6E+07 | 3.6E+07 | KD2-H4K8la_peak_3315 | 8.76116  | AD000671.6_ENSG00000267120;U2AF1L4_ENSG00000161265;PSENEN_ENSG00000205155;AC002398.9_ENSG00000188223 |
| 19 | 3.6E+07 | 3.6E+07 | KD2-H4K8la_peak_3316 | 6.83387  | HSPB6_ENSG00000004776;C19orf55_ENSG00000167595                                                       |
| 19 | 3.6E+07 | 3.6E+07 | KD2-H4K8la_peak_3317 | 4.75945  | LRFN3_ENSG00000126243                                                                                |
| 19 | 3.6E+07 | 3.7E+07 | KD2-H4K8la_peak_3318 | 9.0516   | SYNE4_ENSG00000181392                                                                                |
| 19 | 3.7E+07 | 3.7E+07 | KD2-H4K8la_peak_3319 | 10.49982 |                                                                                                      |
| 19 | 3.7E+07 | 3.7E+07 | KD2-H4K8la_peak_3320 | 8.37064  | ZFP14_ENSG00000142065                                                                                |
| 19 | 3.7E+07 | 3.7E+07 | KD2-H4K8la_peak_3321 | 5.16795  |                                                                                                      |
| 19 | 3.7E+07 | 3.7E+07 | KD2-H4K8la_peak_3322 | 6.25288  |                                                                                                      |
| 19 | 3.8E+07 | 3.8E+07 | KD2-H4K8la_peak_3323 | 7.19298  | CTC-454I21.3_ENSG00000267360                                                                         |
| 19 | 3.8E+07 | 3.8E+07 | KD2-H4K8la_peak_3324 | 7.56826  | ZNF569_ENSG00000196437;ZNF570_ENSG00000171827                                                        |
| 19 | 3.8E+07 | 3.8E+07 | KD2-H4K8la_peak_3325 | 8.65116  | ZNF569_ENSG00000196437                                                                               |
| 19 | 3.8E+07 | 3.8E+07 | KD2-H4K8la_peak_3326 | 6.0136   |                                                                                                      |
| 19 | 3.8E+07 | 3.8E+07 | KD2-H4K8la_peak_3327 | 7.33892  | WDR87_ENSG00000171804;SIPA1L3_ENSG00000105738                                                        |
| 19 | 3.8E+07 | 3.8E+07 | KD2-H4K8la_peak_3328 | 6.28277  |                                                                                                      |
| 19 | 3.9E+07 | 3.9E+07 | KD2-H4K8la_peak_3329 | 17.44668 |                                                                                                      |
| 19 | 3.9E+07 | 3.9E+07 | KD2-H4K8la_peak_3330 | 4.86896  | PPP1R14A_ENSG00000167641                                                                             |
| 19 | 3.9E+07 | 3.9E+07 | KD2-H4K8la_peak_3331 | 7.61975  | KCNK6_ENSG00000099337                                                                                |
| 19 | 3.9E+07 | 3.9E+07 | KD2-H4K8la_peak_3332 | 5.05146  | SPRED3_ENSG00000188766                                                                               |
| 19 | 3.9E+07 | 3.9E+07 | KD2-H4K8la_peak_3333 | 5.33364  |                                                                                                      |
| 19 | 3.9E+07 | 3.9E+07 | KD2-H4K8la_peak_3334 | 7.77341  | EIF3K_ENSG00000178982;MAP4K1_ENSG00000104814                                                         |
| 19 | 3.9E+07 | 3.9E+07 | KD2-H4K8la_peak_3335 | 5.67596  | HNRNPL_ENSG00000104824                                                                               |
| 19 | 3.9E+07 | 3.9E+07 | KD2-H4K8la_peak_3336 | 6.57319  | CCER2_ENSG00000262484                                                                                |
| 19 | 3.9E+07 | 3.9E+07 | KD2-H4K8la_peak_3337 | 4.30663  |                                                                                                      |
| 19 | 4E+07   | 4E+07   | KD2-H4K8la_peak_3338 | 4.72651  | PAK4_ENSG00000130669                                                                                 |
| 19 | 4E+07   | 4E+07   | KD2-H4K8la_peak_3339 | 6.3399   | CTC-246B18.8_ENSG00000268262                                                                         |
| 19 | 4E+07   | 4E+07   | KD2-H4K8la_peak_3340 | 5.58883  |                                                                                                      |
| 19 | 4E+07   | 4E+07   | KD2-H4K8la_peak_3341 | 6.3399   | DLL3_ENSG00000090932                                                                                 |
| 19 | 4E+07   | 4E+07   | KD2-H4K8la_peak_3342 | 5.83285  |                                                                                                      |
| 19 | 4.1E+07 | 4.1E+07 | KD2-H4K8la_peak_3343 | 7.12014  |                                                                                                      |
| 19 | 4.1E+07 | 4.1E+07 | KD2-H4K8la_peak_3344 | 6.70058  |                                                                                                      |
| 19 | 4.1E+07 | 4.1E+07 | KD2-H4K8la_peak_3345 | 7.65547  | SHKBP1_ENSG00000160410                                                                               |
| 19 | 4.1E+07 | 4.1E+07 | KD2-H4K8la_peak_3346 | 5.09889  | SHKBP1_ENSG00000160410                                                                               |
| 19 | 4.1E+07 | 4.1E+07 | KD2-H4K8la_peak_3347 | 12.13455 |                                                                                                      |
| 19 | 4.1E+07 | 4.1E+07 | KD2-H4K8la_peak_3348 | 7.30491  |                                                                                                      |
| 19 | 4.2E+07 | 4.2E+07 | KD2-H4K8la_peak_3349 | 17.98201 |                                                                                                      |
| 19 | 4.2E+07 | 4.2E+07 | KD2-H4K8la_peak_3350 | 15.19386 | ARHGEF1_ENSG00000076928                                                                              |
| 19 | 4.2E+07 | 4.2E+07 | KD2-H4K8la_peak_3351 | 12.36938 |                                                                                                      |
| 19 | 4.2E+07 | 4.2E+07 | KD2-H4K8la_peak_3352 | 8.39919  |                                                                                                      |
| 19 | 4.2E+07 | 4.2E+07 | KD2-H4K8la_peak_3353 | 5.468    | RABAC1_ENSG00000105404                                                                               |
| 19 | 4.2E+07 | 4.2E+07 | KD2-H4K8la_peak_3354 | 7.51014  |                                                                                                      |
| 19 | 4.3E+07 | 4.3E+07 | KD2-H4K8la_peak_3355 | 7.13237  | ATP1A3_ENSG00000105409                                                                               |
| 19 | 4.3E+07 | 4.3E+07 | KD2-H4K8la_peak_3356 | 5.3107   | ATP1A3_ENSG00000105409                                                                               |

|    |         |         |                      |          |                                                                                |
|----|---------|---------|----------------------|----------|--------------------------------------------------------------------------------|
| 19 | 4.3E+07 | 4.3E+07 | KD2-H4K8la_peak_3357 | 9.27415  | GRIK5_ENSG00000105737                                                          |
| 19 | 4.3E+07 | 4.3E+07 | KD2-H4K8la_peak_3358 | 6.86759  |                                                                                |
| 19 | 4.3E+07 | 4.3E+07 | KD2-H4K8la_peak_3359 | 8.0374   | PAFAH1B3_ENSG00000079462                                                       |
| 19 | 4.3E+07 | 4.3E+07 | KD2-H4K8la_peak_3360 | 10.28981 | MEGF8_ENSG00000105429                                                          |
| 19 | 4.4E+07 | 4.4E+07 | KD2-H4K8la_peak_3361 | 5.89088  | ZNF404_ENSG00000176222;RP11-15A1.3_ENSG00000267058;RP11-15A1.2_ENSG00000267191 |
| 19 | 4.5E+07 | 4.5E+07 | KD2-H4K8la_peak_3362 | 4.86896  | ZNF223_ENSG00000178386                                                         |
| 19 | 4.5E+07 | 4.5E+07 | KD2-H4K8la_peak_3363 | 7.72421  | CTC-512J12.4_ENSG00000267188;ZNF229_ENSG00000167383                            |
| 19 | 4.5E+07 | 4.5E+07 | KD2-H4K8la_peak_3364 | 6.64804  | APOC1P1_ENSG00000214855                                                        |
| 19 | 4.6E+07 | 4.6E+07 | KD2-H4K8la_peak_3365 | 6.0136   | RELB_ENSG00000104856                                                           |
| 19 | 4.6E+07 | 4.6E+07 | KD2-H4K8la_peak_3366 | 9.0413   | CLASRP_ENSG00000104859                                                         |
| 19 | 4.6E+07 | 4.6E+07 | KD2-H4K8la_peak_3367 | 9.38376  | PPP1R37_ENSG00000104866                                                        |
| 19 | 4.6E+07 | 4.6E+07 | KD2-H4K8la_peak_3368 | 10.16645 | RTN2_ENSG00000125744                                                           |
| 19 | 4.6E+07 | 4.6E+07 | KD2-H4K8la_peak_3369 | 8.39919  |                                                                                |
| 19 | 4.6E+07 | 4.6E+07 | KD2-H4K8la_peak_3370 | 11.52197 | DMWD_ENSG00000185800                                                           |
| 19 | 4.6E+07 | 4.6E+07 | KD2-H4K8la_peak_3371 | 7.64828  | SYMPK_ENSG00000125755;FOXA3_ENSG00000170608                                    |
| 19 | 4.7E+07 | 4.7E+07 | KD2-H4K8la_peak_3372 | 7.49467  | PTGIR_ENSG00000160013                                                          |
| 19 | 4.7E+07 | 4.7E+07 | KD2-H4K8la_peak_3373 | 5.47284  |                                                                                |
| 19 | 4.7E+07 | 4.7E+07 | KD2-H4K8la_peak_3374 | 8.83119  |                                                                                |
| 19 | 4.7E+07 | 4.7E+07 | KD2-H4K8la_peak_3375 | 9.63836  | GNG8_ENSG00000167414                                                           |
| 19 | 4.7E+07 | 4.7E+07 | KD2-H4K8la_peak_3376 | 6.64804  |                                                                                |
| 19 | 4.7E+07 | 4.7E+07 | KD2-H4K8la_peak_3377 | 13.27013 |                                                                                |
| 19 | 4.8E+07 | 4.8E+07 | KD2-H4K8la_peak_3378 | 5.58883  |                                                                                |
| 19 | 4.8E+07 | 4.8E+07 | KD2-H4K8la_peak_3379 | 8.07102  | TMEM160_ENSG00000130748                                                        |
| 19 | 4.8E+07 | 4.8E+07 | KD2-H4K8la_peak_3380 | 14.23294 |                                                                                |
| 19 | 4.8E+07 | 4.8E+07 | KD2-H4K8la_peak_3381 | 14.25411 | ZC3H4_ENSG00000130749;SAE1_ENSG00000142230                                     |
| 19 | 4.8E+07 | 4.8E+07 | KD2-H4K8la_peak_3382 | 15.69409 | MIR3191_ENSG00000265134                                                        |
| 19 | 4.8E+07 | 4.8E+07 | KD2-H4K8la_peak_3383 | 13.45069 | MIR3191_ENSG00000265134                                                        |
| 19 | 4.8E+07 | 4.8E+07 | KD2-H4K8la_peak_3384 | 6.3399   | MEIS3_ENSG00000105419                                                          |
| 19 | 4.8E+07 | 4.8E+07 | KD2-H4K8la_peak_3385 | 8.76116  |                                                                                |
| 19 | 4.8E+07 | 4.8E+07 | KD2-H4K8la_peak_3386 | 8.43222  | NAPA_ENSG00000105402                                                           |
| 19 | 4.8E+07 | 4.8E+07 | KD2-H4K8la_peak_3387 | 4.30663  |                                                                                |
| 19 | 4.8E+07 | 4.8E+07 | KD2-H4K8la_peak_3388 | 6.77116  |                                                                                |
| 19 | 4.9E+07 | 4.9E+07 | KD2-H4K8la_peak_3389 | 6.96161  | PLA2G4C_ENSG00000105499                                                        |
| 19 | 4.9E+07 | 4.9E+07 | KD2-H4K8la_peak_3390 | 5.36015  | PLA2G4C_ENSG00000105499                                                        |
| 19 | 4.9E+07 | 4.9E+07 | KD2-H4K8la_peak_3391 | 9.27415  |                                                                                |
| 19 | 4.9E+07 | 4.9E+07 | KD2-H4K8la_peak_3392 | 7.13237  |                                                                                |
| 19 | 4.9E+07 | 4.9E+07 | KD2-H4K8la_peak_3393 | 8.27395  | TMEM143_ENSG00000161558;SYNGR4_ENSG00000105467                                 |
| 19 | 4.9E+07 | 4.9E+07 | KD2-H4K8la_peak_3394 | 14.35104 |                                                                                |
| 19 | 4.9E+07 | 4.9E+07 | KD2-H4K8la_peak_3395 | 11.25405 | LMTK3_ENSG00000142235;CTC-273B12.10_ENSG00000269814                            |
| 19 | 4.9E+07 | 4.9E+07 | KD2-H4K8la_peak_3396 | 7.13237  |                                                                                |
| 19 | 4.9E+07 | 4.9E+07 | KD2-H4K8la_peak_3397 | 9.29932  |                                                                                |
| 19 | 4.9E+07 | 4.9E+07 | KD2-H4K8la_peak_3398 | 8.98765  | RPL18_ENSG00000063177;SPHK2_ENSG00000063176                                    |
| 19 | 4.9E+07 | 4.9E+07 | KD2-H4K8la_peak_3399 | 9.61894  | CA11_ENSG00000063180                                                           |
| 19 | 4.9E+07 | 4.9E+07 | KD2-H4K8la_peak_3400 | 6.25288  |                                                                                |
| 19 | 4.9E+07 | 4.9E+07 | KD2-H4K8la_peak_3401 | 9.0516   |                                                                                |
| 19 | 4.9E+07 | 4.9E+07 | KD2-H4K8la_peak_3402 | 6.96161  |                                                                                |

|    |         |         |                      |          |                                                                  |
|----|---------|---------|----------------------|----------|------------------------------------------------------------------|
| 19 | 4.9E+07 | 4.9E+07 | KD2-H4K8la_peak_3403 | 10.07718 |                                                                  |
| 19 | 4.9E+07 | 4.9E+07 | KD2-H4K8la_peak_3404 | 10.02595 |                                                                  |
| 19 | 5E+07   | 5E+07   | KD2-H4K8la_peak_3405 | 6.46158  |                                                                  |
| 19 | 5E+07   | 5E+07   | KD2-H4K8la_peak_3406 | 9.8606   | TRPM4_ENSG00000130529                                            |
| 19 | 5E+07   | 5E+07   | KD2-H4K8la_peak_3407 | 10.15823 | TEAD2_ENSG00000074219;DKKL1_ENSG00000104901                      |
| 19 | 5E+07   | 5E+07   | KD2-H4K8la_peak_3408 | 10.49982 | TEAD2_ENSG00000074219;DKKL1_ENSG00000104901                      |
| 19 | 5E+07   | 5E+07   | KD2-H4K8la_peak_3409 | 6.39623  | TEAD2_ENSG00000074219;DKKL1_ENSG00000104901                      |
| 19 | 5E+07   | 5E+07   | KD2-H4K8la_peak_3410 | 10.49982 | PIH1D1_ENSG00000104872;ALDH16A1_ENSG00000161618                  |
| 19 | 5E+07   | 5E+07   | KD2-H4K8la_peak_3411 | 4.53273  |                                                                  |
| 19 | 5E+07   | 5E+07   | KD2-H4K8la_peak_3412 | 17.16422 | RPL13A_ENSG00000142541                                           |
| 19 | 5E+07   | 5E+07   | KD2-H4K8la_peak_3413 | 8.89364  | RPS11_ENSG00000142534                                            |
| 19 | 5E+07   | 5E+07   | KD2-H4K8la_peak_3414 | 6.19992  |                                                                  |
| 19 | 5E+07   | 5E+07   | KD2-H4K8la_peak_3415 | 9.94613  | PRRG2_ENSG00000126460                                            |
| 19 | 5E+07   | 5E+07   | KD2-H4K8la_peak_3416 | 4.53273  |                                                                  |
| 19 | 5E+07   | 5E+07   | KD2-H4K8la_peak_3417 | 6.96161  | RRAS_ENSG00000126458;SCAF1_ENSG00000126461                       |
| 19 | 5E+07   | 5E+07   | KD2-H4K8la_peak_3418 | 5.43278  |                                                                  |
| 19 | 5E+07   | 5E+07   | KD2-H4K8la_peak_3419 | 8.76116  | IL4I1_ENSG00000104951;NUP62_ENSG00000213024;ATF5_ENSG00000169136 |
| 19 | 5E+07   | 5E+07   | KD2-H4K8la_peak_3420 | 10.90354 | IL4I1_ENSG00000104951;NUP62_ENSG00000213024;ATF5_ENSG00000169136 |
| 19 | 5.1E+07 | 5.1E+07 | KD2-H4K8la_peak_3421 | 13.27013 | VRK3_ENSG00000105053;ZNF473_ENSG00000142528                      |
| 19 | 5.1E+07 | 5.1E+07 | KD2-H4K8la_peak_3422 | 7.13237  |                                                                  |
| 19 | 5.1E+07 | 5.1E+07 | KD2-H4K8la_peak_3423 | 7.49467  | CTB-191K22.6_ENSG00000269392                                     |
| 19 | 5.1E+07 | 5.1E+07 | KD2-H4K8la_peak_3424 | 13.6415  |                                                                  |
| 19 | 5.1E+07 | 5.1E+07 | KD2-H4K8la_peak_3425 | 11.15747 | FAM71E1_ENSG00000142530;EMC10_ENSG00000161671                    |
| 19 | 5.1E+07 | 5.1E+07 | KD2-H4K8la_peak_3426 | 4.86896  | ASPDH_ENSG00000204653                                            |
| 19 | 5.1E+07 | 5.1E+07 | KD2-H4K8la_peak_3427 | 7.68916  | ASPDH_ENSG00000204653                                            |
| 19 | 5.1E+07 | 5.1E+07 | KD2-H4K8la_peak_3428 | 10.20357 |                                                                  |
| 19 | 5.1E+07 | 5.1E+07 | KD2-H4K8la_peak_3429 | 8.13727  |                                                                  |
| 19 | 5.2E+07 | 5.2E+07 | KD2-H4K8la_peak_3430 | 8.43222  | CTU1_ENSG00000142544                                             |
| 19 | 5.2E+07 | 5.2E+07 | KD2-H4K8la_peak_3431 | 15.62171 |                                                                  |
| 19 | 5.2E+07 | 5.2E+07 | KD2-H4K8la_peak_3432 | 7.72421  | ZNF175_ENSG00000105497                                           |
| 19 | 5.2E+07 | 5.2E+07 | KD2-H4K8la_peak_3433 | 5.83285  | AC018755.1_ENSG00000167765;AC018755.16_ENSG00000269388           |
| 19 | 5.2E+07 | 5.2E+07 | KD2-H4K8la_peak_3434 | 5.33301  |                                                                  |
| 19 | 5.2E+07 | 5.2E+07 | KD2-H4K8la_peak_3435 | 6.57319  | ZNF350_ENSG00000256683                                           |
| 19 | 5.3E+07 | 5.3E+07 | KD2-H4K8la_peak_3436 | 10.99007 | ZNF808_ENSG00000198482                                           |
| 19 | 5.3E+07 | 5.3E+07 | KD2-H4K8la_peak_3437 | 7.3993   | ZNF83_ENSG00000167766                                            |
| 19 | 5.4E+07 | 5.4E+07 | KD2-H4K8la_peak_3438 | 5.58883  | ZNF415_ENSG00000170954                                           |
| 19 | 5.4E+07 | 5.4E+07 | KD2-H4K8la_peak_3439 | 10.99007 | ZNF665_ENSG00000197497                                           |
| 19 | 5.4E+07 | 5.4E+07 | KD2-H4K8la_peak_3440 | 8.07102  | ZNF813_ENSG00000198346                                           |
| 19 | 5.4E+07 | 5.4E+07 | KD2-H4K8la_peak_3441 | 8.12466  | ZNF331_ENSG00000130844                                           |
| 19 | 5.4E+07 | 5.4E+07 | KD2-H4K8la_peak_3442 | 7.13237  |                                                                  |
| 19 | 5.4E+07 | 5.4E+07 | KD2-H4K8la_peak_3443 | 7.13237  | CACNG7_ENSG00000105605                                           |
| 19 | 5.4E+07 | 5.4E+07 | KD2-H4K8la_peak_3444 | 8.00675  | CACNG7_ENSG00000105605                                           |
| 19 | 5.5E+07 | 5.5E+07 | KD2-H4K8la_peak_3445 | 7.81267  | OSCAR_ENSG00000170909;NDUFA3_ENSG00000170906                     |
| 19 | 5.5E+07 | 5.5E+07 | KD2-H4K8la_peak_3446 | 6.68593  | OSCAR_ENSG00000170909;NDUFA3_ENSG00000170906                     |
| 19 | 5.5E+07 | 5.5E+07 | KD2-H4K8la_peak_3447 | 15.68123 | CNOT3_ENSG00000088038                                            |
| 19 | 5.5E+07 | 5.5E+07 | KD2-H4K8la_peak_3448 | 6.09229  |                                                                  |

|    |         |         |                      |          |                                                                              |
|----|---------|---------|----------------------|----------|------------------------------------------------------------------------------|
| 19 | 5.6E+07 | 5.6E+07 | KD2-H4K8la_peak_3449 | 6.3399   |                                                                              |
| 19 | 5.6E+07 | 5.6E+07 | KD2-H4K8la_peak_3450 | 5.49688  | PPP6R1_ENSG00000105063                                                       |
| 19 | 5.6E+07 | 5.6E+07 | KD2-H4K8la_peak_3451 | 16.25311 |                                                                              |
| 19 | 5.6E+07 | 5.6E+07 | KD2-H4K8la_peak_3452 | 8.86391  | IL11_ENSG00000095752                                                         |
| 19 | 5.6E+07 | 5.6E+07 | KD2-H4K8la_peak_3453 | 5.84385  | TMEM238_ENSG00000233493;RPL28_ENSG00000108107                                |
| 19 | 5.6E+07 | 5.6E+07 | KD2-H4K8la_peak_3454 | 10.76886 | ISOC2_ENSG00000063241                                                        |
| 19 | 5.6E+07 | 5.6E+07 | KD2-H4K8la_peak_3455 | 9.27415  | CTD-253719.16_ENSG00000269859;ZNF628_ENSG00000197483                         |
| 19 | 5.6E+07 | 5.6E+07 | KD2-H4K8la_peak_3456 | 7.35742  | NAT14_ENSG00000090971                                                        |
| 19 | 5.6E+07 | 5.6E+07 | KD2-H4K8la_peak_3457 | 6.68593  |                                                                              |
| 19 | 5.6E+07 | 5.6E+07 | KD2-H4K8la_peak_3458 | 7.13237  |                                                                              |
| 19 | 5.6E+07 | 5.6E+07 | KD2-H4K8la_peak_3459 | 9.61894  | ZNF579_ENSG00000218891                                                       |
| 19 | 5.6E+07 | 5.6E+07 | KD2-H4K8la_peak_3460 | 9.0413   | ZNF579_ENSG00000218891                                                       |
| 19 | 5.6E+07 | 5.6E+07 | KD2-H4K8la_peak_3461 | 10.90862 |                                                                              |
| 19 | 5.6E+07 | 5.6E+07 | KD2-H4K8la_peak_3462 | 6.25495  | FIZ1_ENSG00000179943;ZNF524_ENSG00000171443                                  |
| 19 | 5.6E+07 | 5.6E+07 | KD2-H4K8la_peak_3463 | 8.43222  | ZNF865_ENSG00000261221                                                       |
| 19 | 5.6E+07 | 5.6E+07 | KD2-H4K8la_peak_3464 | 10.00612 | ZNF580_ENSG00000213015;ZNF581_ENSG00000171425                                |
| 19 | 5.6E+07 | 5.6E+07 | KD2-H4K8la_peak_3465 | 7.77341  | CCDC106_ENSG00000173581                                                      |
| 19 | 5.6E+07 | 5.6E+07 | KD2-H4K8la_peak_3466 | 6.3399   | U2AF2_ENSG00000063244                                                        |
| 19 | 5.7E+07 | 5.7E+07 | KD2-H4K8la_peak_3467 | 4.53273  |                                                                              |
| 19 | 5.8E+07 | 5.8E+07 | KD2-H4K8la_peak_3468 | 6.46158  | ZNF304_ENSG00000131845                                                       |
| 19 | 5.8E+07 | 5.8E+07 | KD2-H4K8la_peak_3469 | 8.76082  | CTC-444N24.13_ENSG00000268678;ZNF304_ENSG00000131845                         |
| 19 | 5.8E+07 | 5.8E+07 | KD2-H4K8la_peak_3470 | 7.23116  | ZNF749_ENSG00000186230                                                       |
| 19 | 5.8E+07 | 5.8E+07 | KD2-H4K8la_peak_3471 | 9.36457  | AC004076.9_ENSG00000268163;ZNF772_ENSG00000197128;AC003005.2_ENSG00000268266 |
| 19 | 5.8E+07 | 5.8E+07 | KD2-H4K8la_peak_3472 | 11.06859 | ZNF419_ENSG00000105136;AC003005.4_ENSG00000268107                            |
| 19 | 5.8E+07 | 5.8E+07 | KD2-H4K8la_peak_3473 | 5.05146  |                                                                              |
| 19 | 5.8E+07 | 5.8E+07 | KD2-H4K8la_peak_3474 | 8.76082  | AC003682.17_ENSG00000269097                                                  |
| 19 | 5.8E+07 | 5.8E+07 | KD2-H4K8la_peak_3475 | 8.944    | ZNF551_ENSG00000204519;AC003006.7_ENSG00000269026                            |
| 19 | 5.8E+07 | 5.8E+07 | KD2-H4K8la_peak_3476 | 6.57319  | ZNF776_ENSG00000152443                                                       |
| 19 | 5.8E+07 | 5.8E+07 | KD2-H4K8la_peak_3477 | 5.83285  | ZNF587_ENSG00000198466                                                       |
| 19 | 5.9E+07 | 5.9E+07 | KD2-H4K8la_peak_3478 | 9.6708   | ZNF606_ENSG00000166704;CTD-2368P22.1_ENSG00000176593                         |
| 19 | 5.9E+07 | 5.9E+07 | KD2-H4K8la_peak_3479 | 5.90392  | ZNF606_ENSG00000166704;CTD-2368P22.1_ENSG00000176593                         |
| 19 | 5.9E+07 | 5.9E+07 | KD2-H4K8la_peak_3480 | 10.97039 | ZNF274_ENSG00000171606                                                       |
| 19 | 5.9E+07 | 5.9E+07 | KD2-H4K8la_peak_3481 | 12.43263 | RPS5_ENSG00000083845;MIR4754_ENSG00000266640                                 |
| 19 | 5.9E+07 | 5.9E+07 | KD2-H4K8la_peak_3482 | 6.68593  | CTD-2619J13.13_ENSG00000268307;ZNF584_ENSG00000171574                        |
| 19 | 5.9E+07 | 5.9E+07 | KD2-H4K8la_peak_3483 | 8.76116  | ZNF132_ENSG00000131849;CTD-2619J13.19_ENSG00000269473                        |
| 19 | 5.9E+07 | 5.9E+07 | KD2-H4K8la_peak_3484 | 7.97203  |                                                                              |
| 19 | 5.9E+07 | 5.9E+07 | KD2-H4K8la_peak_3485 | 8.944    | CHMP2A_ENSG00000130724                                                       |
| 19 | 5.9E+07 | 5.9E+07 | KD2-H4K8la_peak_3486 | 7.23932  |                                                                              |
| 2  | 264312  | 264527  | KD2-H4K8la_peak_3487 | 8.3497   | ACPI1_ENSG00000143727                                                        |
| 2  | 265098  | 265310  | KD2-H4K8la_peak_3488 | 5.43278  | ACPI1_ENSG00000143727                                                        |
| 2  | 844524  | 844781  | KD2-H4K8la_peak_3489 | 10.16316 |                                                                              |
| 2  | 945764  | 946061  | KD2-H4K8la_peak_3490 | 7.51014  | AC116614.1_ENSG00000235688;SNTG2_ENSG00000172554                             |
| 2  | 1286929 | 1287440 | KD2-H4K8la_peak_3491 | 4.30663  |                                                                              |
| 2  | 1598396 | 1598602 | KD2-H4K8la_peak_3492 | 6.57176  |                                                                              |
| 2  | 1718020 | 1718282 | KD2-H4K8la_peak_3493 | 7.3993   |                                                                              |
| 2  | 2194592 | 2194811 | KD2-H4K8la_peak_3494 | 5.66328  |                                                                              |

|   |         |         |                      |          |                                                   |
|---|---------|---------|----------------------|----------|---------------------------------------------------|
| 2 | 2617956 | 2618225 | KD2-H4K8la_peak_3495 | 7.56395  |                                                   |
| 2 | 2661123 | 2661341 | KD2-H4K8la_peak_3496 | 6.28686  | AC018685.1_ENSG00000234929                        |
| 2 | 2850510 | 2850749 | KD2-H4K8la_peak_3497 | 8.22268  |                                                   |
| 2 | 2852760 | 2853124 | KD2-H4K8la_peak_3498 | 9.40293  |                                                   |
| 2 | 2853717 | 2854034 | KD2-H4K8la_peak_3499 | 5.25645  |                                                   |
| 2 | 2922951 | 2923227 | KD2-H4K8la_peak_3500 | 9.05604  |                                                   |
| 2 | 3104289 | 3104521 | KD2-H4K8la_peak_3501 | 7.0396   |                                                   |
| 2 | 3105816 | 3106700 | KD2-H4K8la_peak_3502 | 25.17273 |                                                   |
| 2 | 3129601 | 3130428 | KD2-H4K8la_peak_3503 | 9.92226  | AC019118.2_ENSG00000234423                        |
| 2 | 3134684 | 3134998 | KD2-H4K8la_peak_3504 | 12.14696 |                                                   |
| 2 | 3306957 | 3307352 | KD2-H4K8la_peak_3505 | 18.06211 |                                                   |
| 2 | 3381958 | 3382518 | KD2-H4K8la_peak_3506 | 7.12972  | TSSC1_ENSG00000032389;TRAPPC12_ENSG00000171853    |
| 2 | 3452427 | 3452632 | KD2-H4K8la_peak_3507 | 6.72304  |                                                   |
| 2 | 3522205 | 3522579 | KD2-H4K8la_peak_3508 | 8.4237   | ADII_ENSG00000182551;AC142528.1_ENSG00000235078   |
| 2 | 3523072 | 3523306 | KD2-H4K8la_peak_3509 | 11.74575 | ADII_ENSG00000182551;AC142528.1_ENSG00000235078   |
| 2 | 3622252 | 3622674 | KD2-H4K8la_peak_3510 | 10.94155 | RPS7_ENSG00000171863                              |
| 2 | 3633036 | 3633259 | KD2-H4K8la_peak_3511 | 10.12382 |                                                   |
| 2 | 3642498 | 3642735 | KD2-H4K8la_peak_3512 | 7.68525  | COLEC11_ENSG00000118004                           |
| 2 | 3642953 | 3643163 | KD2-H4K8la_peak_3513 | 6.41605  | COLEC11_ENSG00000118004                           |
| 2 | 3651029 | 3651388 | KD2-H4K8la_peak_3514 | 7.23932  | AC010907.2_ENSG00000237370                        |
| 2 | 5125277 | 5125501 | KD2-H4K8la_peak_3515 | 6.2278   |                                                   |
| 2 | 5813452 | 5813748 | KD2-H4K8la_peak_3516 | 7.65547  |                                                   |
| 2 | 5837031 | 5837272 | KD2-H4K8la_peak_3517 | 7.12014  | AC010729.1_ENSG00000242540                        |
| 2 | 6220725 | 6221008 | KD2-H4K8la_peak_3518 | 10.47118 |                                                   |
| 2 | 6271471 | 6271730 | KD2-H4K8la_peak_3519 | 9.0413   |                                                   |
| 2 | 6429477 | 6429854 | KD2-H4K8la_peak_3520 | 6.75222  |                                                   |
| 2 | 6877465 | 6877684 | KD2-H4K8la_peak_3521 | 6.26214  |                                                   |
| 2 | 7057148 | 7057354 | KD2-H4K8la_peak_3522 | 6.38565  | RNF144A_ENSG00000151692                           |
| 2 | 8677127 | 8677351 | KD2-H4K8la_peak_3523 | 7.49897  |                                                   |
| 2 | 8679879 | 8680107 | KD2-H4K8la_peak_3524 | 9.06396  |                                                   |
| 2 | 9143504 | 9143748 | KD2-H4K8la_peak_3525 | 8.06229  | MBOAT2_ENSG00000143797                            |
| 2 | 9144266 | 9144743 | KD2-H4K8la_peak_3526 | 12.97817 | MBOAT2_ENSG00000143797                            |
| 2 | 9345971 | 9346199 | KD2-H4K8la_peak_3527 | 7.61975  | ASAP2_ENSG00000151693                             |
| 2 | 9347169 | 9347559 | KD2-H4K8la_peak_3528 | 4.75945  | ASAP2_ENSG00000151693                             |
| 2 | 9376140 | 9376346 | KD2-H4K8la_peak_3529 | 8.58767  |                                                   |
| 2 | 9614153 | 9615245 | KD2-H4K8la_peak_3530 | 11.7374  | IAH1_ENSG00000134330                              |
| 2 | 9983057 | 9983363 | KD2-H4K8la_peak_3531 | 8.89364  | TAF1B_ENSG00000115750                             |
| 2 | 1E+07   | 1E+07   | KD2-H4K8la_peak_3532 | 8.61463  |                                                   |
| 2 | 1E+07   | 1E+07   | KD2-H4K8la_peak_3533 | 18.4179  |                                                   |
| 2 | 1E+07   | 1E+07   | KD2-H4K8la_peak_3534 | 11.81269 |                                                   |
| 2 | 1E+07   | 1E+07   | KD2-H4K8la_peak_3535 | 11.50359 | HPCAL1_ENSG00000115756                            |
| 2 | 1.1E+07 | 1.1E+07 | KD2-H4K8la_peak_3536 | 4.69635  |                                                   |
| 2 | 1.1E+07 | 1.1E+07 | KD2-H4K8la_peak_3537 | 7.61975  |                                                   |
| 2 | 1.1E+07 | 1.1E+07 | KD2-H4K8la_peak_3538 | 4.63265  |                                                   |
| 2 | 1.1E+07 | 1.1E+07 | KD2-H4K8la_peak_3539 | 17.22831 | ODC1_ENSG00000115758;RP11-320M2.1_ENSG00000257135 |
| 2 | 1.1E+07 | 1.1E+07 | KD2-H4K8la_peak_3540 | 6.43451  |                                                   |

|   |         |         |                      |          |                                                   |
|---|---------|---------|----------------------|----------|---------------------------------------------------|
| 2 | 1.1E+07 | 1.1E+07 | KD2-H4K8la_peak_3541 | 6.13507  | NOL10_ENSG00000115761;RN7SL832P_ENSG00000243819   |
| 2 | 1.1E+07 | 1.1E+07 | KD2-H4K8la_peak_3542 | 10.22817 |                                                   |
| 2 | 1.1E+07 | 1.1E+07 | KD2-H4K8la_peak_3543 | 9.20163  |                                                   |
| 2 | 1.2E+07 | 1.2E+07 | KD2-H4K8la_peak_3544 | 12.12824 |                                                   |
| 2 | 1.2E+07 | 1.2E+07 | KD2-H4K8la_peak_3545 | 7.86224  |                                                   |
| 2 | 1.3E+07 | 1.3E+07 | KD2-H4K8la_peak_3546 | 9.0413   |                                                   |
| 2 | 1.5E+07 | 1.5E+07 | KD2-H4K8la_peak_3547 | 5.47767  | AC011897.1_ENSG00000265629                        |
| 2 | 1.6E+07 | 1.6E+07 | KD2-H4K8la_peak_3548 | 9.29385  |                                                   |
| 2 | 1.6E+07 | 1.6E+07 | KD2-H4K8la_peak_3549 | 9.20163  |                                                   |
| 2 | 1.6E+07 | 1.6E+07 | KD2-H4K8la_peak_3550 | 6.2381   |                                                   |
| 2 | 1.6E+07 | 1.6E+07 | KD2-H4K8la_peak_3551 | 12.11591 |                                                   |
| 2 | 1.6E+07 | 1.6E+07 | KD2-H4K8la_peak_3552 | 7.3993   |                                                   |
| 2 | 1.7E+07 | 1.7E+07 | KD2-H4K8la_peak_3553 | 4.6668   |                                                   |
| 2 | 1.8E+07 | 1.8E+07 | KD2-H4K8la_peak_3554 | 6.19992  |                                                   |
| 2 | 1.8E+07 | 1.8E+07 | KD2-H4K8la_peak_3555 | 7.92775  | GEN1_ENSG00000178295                              |
| 2 | 1.9E+07 | 1.9E+07 | KD2-H4K8la_peak_3556 | 8.80749  | RDH14_ENSG00000240857                             |
| 2 | 2E+07   | 2E+07   | KD2-H4K8la_peak_3557 | 12.24258 | TTC32_ENSG00000183891;RP11-79O8.1_ENSG00000271991 |
| 2 | 2E+07   | 2E+07   | KD2-H4K8la_peak_3558 | 9.92226  | MATN3_ENSG00000132031                             |
| 2 | 2E+07   | 2E+07   | KD2-H4K8la_peak_3559 | 6.47266  |                                                   |
| 2 | 2E+07   | 2E+07   | KD2-H4K8la_peak_3560 | 11.18137 |                                                   |
| 2 | 2.1E+07 | 2.1E+07 | KD2-H4K8la_peak_3561 | 11.46073 | PUM2_ENSG0000055917                               |
| 2 | 2.1E+07 | 2.1E+07 | KD2-H4K8la_peak_3562 | 7.49467  |                                                   |
| 2 | 2.1E+07 | 2.1E+07 | KD2-H4K8la_peak_3563 | 9.67249  | RHOB_ENSG00000143878                              |
| 2 | 2.1E+07 | 2.1E+07 | KD2-H4K8la_peak_3564 | 5.0364   | HS1BP3_ENSG00000118960                            |
| 2 | 2.1E+07 | 2.1E+07 | KD2-H4K8la_peak_3565 | 5.05146  |                                                   |
| 2 | 2.4E+07 | 2.4E+07 | KD2-H4K8la_peak_3566 | 10.49982 |                                                   |
| 2 | 2.4E+07 | 2.4E+07 | KD2-H4K8la_peak_3567 | 10.00129 | KLHL29_ENSG00000119771                            |
| 2 | 2.4E+07 | 2.4E+07 | KD2-H4K8la_peak_3568 | 12.62032 |                                                   |
| 2 | 2.4E+07 | 2.4E+07 | KD2-H4K8la_peak_3569 | 9.60842  |                                                   |
| 2 | 2.4E+07 | 2.4E+07 | KD2-H4K8la_peak_3570 | 7.92775  |                                                   |
| 2 | 2.4E+07 | 2.4E+07 | KD2-H4K8la_peak_3571 | 5.99671  |                                                   |
| 2 | 2.4E+07 | 2.4E+07 | KD2-H4K8la_peak_3572 | 5.83285  |                                                   |
| 2 | 2.4E+07 | 2.4E+07 | KD2-H4K8la_peak_3573 | 5.58883  |                                                   |
| 2 | 2.4E+07 | 2.4E+07 | KD2-H4K8la_peak_3574 | 5.33721  | C2orf44_ENSG00000163026;FKBP1B_ENSG00000119782    |
| 2 | 2.4E+07 | 2.4E+07 | KD2-H4K8la_peak_3575 | 12.97817 | PFN4_ENSG00000176732                              |
| 2 | 2.4E+07 | 2.4E+07 | KD2-H4K8la_peak_3576 | 8.0538   | PFN4_ENSG00000176732;RP11-507M3.1_ENSG00000266118 |
| 2 | 2.5E+07 | 2.5E+07 | KD2-H4K8la_peak_3577 | 9.46185  | ITSN2_ENSG00000198399                             |
| 2 | 2.5E+07 | 2.5E+07 | KD2-H4K8la_peak_3578 | 11.73315 | NCOA1_ENSG00000084676                             |
| 2 | 2.5E+07 | 2.5E+07 | KD2-H4K8la_peak_3579 | 14.10219 |                                                   |
| 2 | 2.6E+07 | 2.6E+07 | KD2-H4K8la_peak_3580 | 12.12037 |                                                   |
| 2 | 2.6E+07 | 2.6E+07 | KD2-H4K8la_peak_3581 | 6.76424  |                                                   |
| 2 | 2.6E+07 | 2.6E+07 | KD2-H4K8la_peak_3582 | 6.13507  |                                                   |
| 2 | 2.6E+07 | 2.6E+07 | KD2-H4K8la_peak_3583 | 9.67249  |                                                   |
| 2 | 2.6E+07 | 2.6E+07 | KD2-H4K8la_peak_3584 | 9.67249  | DNMT3A_ENSG00000119772                            |
| 2 | 2.6E+07 | 2.6E+07 | KD2-H4K8la_peak_3585 | 9.92226  | DTNB_ENSG00000138101                              |
| 2 | 2.6E+07 | 2.6E+07 | KD2-H4K8la_peak_3586 | 7.12308  | KIF3C_ENSG00000084731                             |

|   |         |         |                      |          |                                                                                 |
|---|---------|---------|----------------------|----------|---------------------------------------------------------------------------------|
| 2 | 2.7E+07 | 2.7E+07 | KD2-H4K8la_peak_3587 | 5.3312   |                                                                                 |
| 2 | 2.7E+07 | 2.7E+07 | KD2-H4K8la_peak_3588 | 6.47266  | C2orf70_ENSG00000173557                                                         |
| 2 | 2.7E+07 | 2.7E+07 | KD2-H4K8la_peak_3589 | 5.41777  |                                                                                 |
| 2 | 2.7E+07 | 2.7E+07 | KD2-H4K8la_peak_3590 | 10.02595 |                                                                                 |
| 2 | 2.7E+07 | 2.7E+07 | KD2-H4K8la_peak_3591 | 13.38201 | SLC35F6_ENSG00000213699;CENPA_ENSG00000115163                                   |
| 2 | 2.7E+07 | 2.7E+07 | KD2-H4K8la_peak_3592 | 8.89364  | SLC35F6_ENSG00000213699;CENPA_ENSG00000115163                                   |
| 2 | 2.7E+07 | 2.7E+07 | KD2-H4K8la_peak_3593 | 8.66164  |                                                                                 |
| 2 | 2.7E+07 | 2.7E+07 | KD2-H4K8la_peak_3594 | 8.48577  |                                                                                 |
| 2 | 2.7E+07 | 2.7E+07 | KD2-H4K8la_peak_3595 | 5.29444  | TMEM214_ENSG00000119777                                                         |
| 2 | 2.7E+07 | 2.7E+07 | KD2-H4K8la_peak_3596 | 9.70817  | AGBL5-AS1_ENSG00000231636                                                       |
| 2 | 2.7E+07 | 2.7E+07 | KD2-H4K8la_peak_3597 | 12.59787 |                                                                                 |
| 2 | 2.7E+07 | 2.7E+07 | KD2-H4K8la_peak_3598 | 9.9149   | OST4_ENSG00000228474                                                            |
| 2 | 2.7E+07 | 2.7E+07 | KD2-H4K8la_peak_3599 | 6.9399   | EMILIN1_ENSG00000138080                                                         |
| 2 | 2.7E+07 | 2.7E+07 | KD2-H4K8la_peak_3600 | 6.68593  | KHK_ENSG00000138030                                                             |
| 2 | 2.7E+07 | 2.7E+07 | KD2-H4K8la_peak_3601 | 6.75222  |                                                                                 |
| 2 | 2.7E+07 | 2.7E+07 | KD2-H4K8la_peak_3602 | 9.14592  | CGREF1_ENSG00000138028                                                          |
| 2 | 2.7E+07 | 2.7E+07 | KD2-H4K8la_peak_3603 | 7.68525  | ABHD1_ENSG00000143994                                                           |
| 2 | 2.7E+07 | 2.7E+07 | KD2-H4K8la_peak_3604 | 13.17297 | PREB_ENSG00000138073                                                            |
| 2 | 2.7E+07 | 2.7E+07 | KD2-H4K8la_peak_3605 | 10.94155 |                                                                                 |
| 2 | 2.8E+07 | 2.8E+07 | KD2-H4K8la_peak_3606 | 8.59042  |                                                                                 |
| 2 | 2.8E+07 | 2.8E+07 | KD2-H4K8la_peak_3607 | 9.27415  | GTF3C2_ENSG00000115207;AC074117.10_ENSG00000234072                              |
| 2 | 2.8E+07 | 2.8E+07 | KD2-H4K8la_peak_3608 | 9.61894  | GTF3C2_ENSG00000115207;AC074117.10_ENSG00000234072                              |
| 2 | 2.8E+07 | 2.8E+07 | KD2-H4K8la_peak_3609 | 10.87112 | FNDC4_ENSG00000115226                                                           |
| 2 | 2.8E+07 | 2.8E+07 | KD2-H4K8la_peak_3610 | 6.27787  | AC074091.1_ENSG00000221531;ZNF512_ENSG00000243943;RP11-158I13.2_ENSG00000259080 |
| 2 | 2.8E+07 | 2.8E+07 | KD2-H4K8la_peak_3611 | 8.06229  | SUPT7L_ENSG00000119760;SLC4A1AP_ENSG00000163798                                 |
| 2 | 2.8E+07 | 2.8E+07 | KD2-H4K8la_peak_3612 | 9.10568  | AC074091.13_ENSG00000205334                                                     |
| 2 | 2.8E+07 | 2.8E+07 | KD2-H4K8la_peak_3613 | 6.68593  | AC074091.13_ENSG00000205334                                                     |
| 2 | 2.8E+07 | 2.8E+07 | KD2-H4K8la_peak_3614 | 5.70367  |                                                                                 |
| 2 | 2.8E+07 | 2.8E+07 | KD2-H4K8la_peak_3615 | 6.25288  | RBKS_ENSG00000171174                                                            |
| 2 | 2.9E+07 | 2.9E+07 | KD2-H4K8la_peak_3616 | 10.87112 |                                                                                 |
| 2 | 2.9E+07 | 2.9E+07 | KD2-H4K8la_peak_3617 | 6.68593  |                                                                                 |
| 2 | 2.9E+07 | 2.9E+07 | KD2-H4K8la_peak_3618 | 7.3993   | PPP1CB_ENSG00000213639                                                          |
| 2 | 2.9E+07 | 2.9E+07 | KD2-H4K8la_peak_3619 | 10.87112 |                                                                                 |
| 2 | 2.9E+07 | 2.9E+07 | KD2-H4K8la_peak_3620 | 16.33239 |                                                                                 |
| 2 | 2.9E+07 | 2.9E+07 | KD2-H4K8la_peak_3621 | 11.45154 |                                                                                 |
| 2 | 2.9E+07 | 2.9E+07 | KD2-H4K8la_peak_3622 | 6.68593  |                                                                                 |
| 2 | 2.9E+07 | 2.9E+07 | KD2-H4K8la_peak_3623 | 11.00891 |                                                                                 |
| 2 | 2.9E+07 | 2.9E+07 | KD2-H4K8la_peak_3624 | 8.16787  |                                                                                 |
| 2 | 2.9E+07 | 2.9E+07 | KD2-H4K8la_peak_3625 | 5.79108  |                                                                                 |
| 2 | 2.9E+07 | 2.9E+07 | KD2-H4K8la_peak_3626 | 10.45168 |                                                                                 |
| 2 | 2.9E+07 | 2.9E+07 | KD2-H4K8la_peak_3627 | 7.23932  |                                                                                 |
| 2 | 2.9E+07 | 2.9E+07 | KD2-H4K8la_peak_3628 | 9.46422  |                                                                                 |
| 2 | 2.9E+07 | 2.9E+07 | KD2-H4K8la_peak_3629 | 7.53542  |                                                                                 |
| 2 | 2.9E+07 | 2.9E+07 | KD2-H4K8la_peak_3630 | 7.28149  |                                                                                 |
| 2 | 2.9E+07 | 2.9E+07 | KD2-H4K8la_peak_3631 | 14.7348  |                                                                                 |
| 2 | 2.9E+07 | 2.9E+07 | KD2-H4K8la_peak_3632 | 4.89452  |                                                                                 |

|   |         |         |                      |          |                                                      |
|---|---------|---------|----------------------|----------|------------------------------------------------------|
| 2 | 3E+07   | 3E+07   | KD2-H4K8la_peak_3633 | 11.24937 |                                                      |
| 2 | 3E+07   | 3E+07   | KD2-H4K8la_peak_3634 | 7.7786   |                                                      |
| 2 | 3E+07   | 3E+07   | KD2-H4K8la_peak_3635 | 8.61032  |                                                      |
| 2 | 3E+07   | 3E+07   | KD2-H4K8la_peak_3636 | 7.12014  |                                                      |
| 2 | 3E+07   | 3E+07   | KD2-H4K8la_peak_3637 | 7.10506  |                                                      |
| 2 | 3E+07   | 3E+07   | KD2-H4K8la_peak_3638 | 8.39919  |                                                      |
| 2 | 3E+07   | 3E+07   | KD2-H4K8la_peak_3639 | 8.75981  |                                                      |
| 2 | 3E+07   | 3E+07   | KD2-H4K8la_peak_3640 | 5.40012  |                                                      |
| 2 | 3.1E+07 | 3.1E+07 | KD2-H4K8la_peak_3641 | 5.23773  | CAPN14_ENSG00000214711;EHD3_ENSG00000013016          |
| 2 | 3.2E+07 | 3.2E+07 | KD2-H4K8la_peak_3642 | 6.13507  | RP11-563N4.1_ENSG00000272716;SLC30A6_ENSG00000152683 |
| 2 | 3.3E+07 | 3.3E+07 | KD2-H4K8la_peak_3643 | 4.6555   | BIRC6_ENSG00000115760                                |
| 2 | 3.3E+07 | 3.3E+07 | KD2-H4K8la_peak_3644 | 10.87112 | BIRC6_ENSG00000115760                                |
| 2 | 3.7E+07 | 3.7E+07 | KD2-H4K8la_peak_3645 | 6.38565  | STRN_ENSG00000115808                                 |
| 2 | 3.7E+07 | 3.7E+07 | KD2-H4K8la_peak_3646 | 11.40266 | SULT6B1_ENSG00000138068;CEBPZ-AS1_ENSG00000218739    |
| 2 | 3.8E+07 | 3.8E+07 | KD2-H4K8la_peak_3647 | 6.61963  | PRKD3_ENSG00000115825;AC007391.2_ENSG00000232028     |
| 2 | 3.8E+07 | 3.8E+07 | KD2-H4K8la_peak_3648 | 7.0396   |                                                      |
| 2 | 3.8E+07 | 3.8E+07 | KD2-H4K8la_peak_3649 | 10.37746 |                                                      |
| 2 | 3.8E+07 | 3.8E+07 | KD2-H4K8la_peak_3650 | 5.50657  |                                                      |
| 2 | 3.8E+07 | 3.8E+07 | KD2-H4K8la_peak_3651 | 5.84082  |                                                      |
| 2 | 3.8E+07 | 3.8E+07 | KD2-H4K8la_peak_3652 | 8.39919  |                                                      |
| 2 | 3.8E+07 | 3.8E+07 | KD2-H4K8la_peak_3653 | 8.76116  | CYP1B1-AS1_ENSG00000232973                           |
| 2 | 3.9E+07 | 3.9E+07 | KD2-H4K8la_peak_3654 | 15.19386 | ATL2_ENSG00000119787                                 |
| 2 | 3.9E+07 | 3.9E+07 | KD2-H4K8la_peak_3655 | 20.05453 | RP11-541E12.1_ENSG00000271443                        |
| 2 | 3.9E+07 | 3.9E+07 | KD2-H4K8la_peak_3656 | 14.11447 | AC011247.3_ENSG00000235586;HNRNPLL_ENSG00000143889   |
| 2 | 3.9E+07 | 3.9E+07 | KD2-H4K8la_peak_3657 | 5.84385  |                                                      |
| 2 | 3.9E+07 | 3.9E+07 | KD2-H4K8la_peak_3658 | 6.3399   | SOS1_ENSG00000115904                                 |
| 2 | 4E+07   | 4E+07   | KD2-H4K8la_peak_3659 | 7.12014  | TMEM178A_ENSG00000152154                             |
| 2 | 4.2E+07 | 4.2E+07 | KD2-H4K8la_peak_3660 | 5.83285  |                                                      |
| 2 | 4.2E+07 | 4.2E+07 | KD2-H4K8la_peak_3661 | 8.16916  | EML4_ENSG00000143924                                 |
| 2 | 4.3E+07 | 4.3E+07 | KD2-H4K8la_peak_3662 | 13.00097 |                                                      |
| 2 | 4.3E+07 | 4.3E+07 | KD2-H4K8la_peak_3663 | 6.4136   | KCNG3_ENSG00000171126;MTA3_ENSG00000057935           |
| 2 | 4.3E+07 | 4.3E+07 | KD2-H4K8la_peak_3664 | 12.35598 |                                                      |
| 2 | 4.3E+07 | 4.3E+07 | KD2-H4K8la_peak_3665 | 9.78176  |                                                      |
| 2 | 4.3E+07 | 4.3E+07 | KD2-H4K8la_peak_3666 | 5.43278  |                                                      |
| 2 | 4.3E+07 | 4.3E+07 | KD2-H4K8la_peak_3667 | 8.13557  |                                                      |
| 2 | 4.3E+07 | 4.3E+07 | KD2-H4K8la_peak_3668 | 6.56022  |                                                      |
| 2 | 4.3E+07 | 4.3E+07 | KD2-H4K8la_peak_3669 | 8.13557  |                                                      |
| 2 | 4.4E+07 | 4.4E+07 | KD2-H4K8la_peak_3670 | 7.49467  |                                                      |
| 2 | 4.4E+07 | 4.4E+07 | KD2-H4K8la_peak_3671 | 8.37064  |                                                      |
| 2 | 4.4E+07 | 4.4E+07 | KD2-H4K8la_peak_3672 | 5.28047  |                                                      |
| 2 | 4.4E+07 | 4.4E+07 | KD2-H4K8la_peak_3673 | 4.86896  |                                                      |
| 2 | 4.4E+07 | 4.4E+07 | KD2-H4K8la_peak_3674 | 16.12381 | LRPPRC_ENSG00000138095                               |
| 2 | 4.4E+07 | 4.4E+07 | KD2-H4K8la_peak_3675 | 9.27415  |                                                      |
| 2 | 4.5E+07 | 4.5E+07 | KD2-H4K8la_peak_3676 | 5.24321  |                                                      |
| 2 | 4.5E+07 | 4.5E+07 | KD2-H4K8la_peak_3677 | 7.61975  |                                                      |
| 2 | 4.5E+07 | 4.5E+07 | KD2-H4K8la_peak_3678 | 5.27164  | RP11-89K21.1_ENSG00000259439                         |



|   |         |         |                      |          |                                                    |
|---|---------|---------|----------------------|----------|----------------------------------------------------|
| 2 | 4.5E+07 | 4.5E+07 | KD2-H4K8la_peak_3679 | 8.96792  | RP11-89K21.1_ENSG00000259439                       |
| 2 | 4.5E+07 | 4.5E+07 | KD2-H4K8la_peak_3680 | 4.69635  | SIX3-AS1_ENSG00000236502;SIX3_ENSG00000138083      |
| 2 | 4.5E+07 | 4.5E+07 | KD2-H4K8la_peak_3681 | 6.57176  | SIX3-AS1_ENSG00000236502;SIX3_ENSG00000138083      |
| 2 | 4.5E+07 | 4.5E+07 | KD2-H4K8la_peak_3682 | 5.27164  |                                                    |
| 2 | 4.5E+07 | 4.5E+07 | KD2-H4K8la_peak_3683 | 10.02595 | AC093702.1_ENSG00000231156                         |
| 2 | 4.7E+07 | 4.7E+07 | KD2-H4K8la_peak_3684 | 5.55274  |                                                    |
| 2 | 4.7E+07 | 4.7E+07 | KD2-H4K8la_peak_3685 | 10.34952 |                                                    |
| 2 | 4.7E+07 | 4.7E+07 | KD2-H4K8la_peak_3686 | 5.7062   |                                                    |
| 2 | 4.7E+07 | 4.7E+07 | KD2-H4K8la_peak_3687 | 10.47118 | PIGF_ENSG00000151665;CRIPT_ENSG00000119878         |
| 2 | 4.7E+07 | 4.7E+07 | KD2-H4K8la_peak_3688 | 4.80784  |                                                    |
| 2 | 4.7E+07 | 4.7E+07 | KD2-H4K8la_peak_3689 | 9.19986  | SOCS5_ENSG00000171150                              |
| 2 | 4.7E+07 | 4.7E+07 | KD2-H4K8la_peak_3690 | 5.99671  |                                                    |
| 2 | 4.7E+07 | 4.7E+07 | KD2-H4K8la_peak_3691 | 10.39508 |                                                    |
| 2 | 4.7E+07 | 4.7E+07 | KD2-H4K8la_peak_3692 | 8.0333   |                                                    |
| 2 | 4.7E+07 | 4.7E+07 | KD2-H4K8la_peak_3693 | 8.06229  |                                                    |
| 2 | 4.7E+07 | 4.7E+07 | KD2-H4K8la_peak_3694 | 14.26347 |                                                    |
| 2 | 4.7E+07 | 4.7E+07 | KD2-H4K8la_peak_3695 | 18.83567 |                                                    |
| 2 | 4.7E+07 | 4.7E+07 | KD2-H4K8la_peak_3696 | 10.47118 |                                                    |
| 2 | 4.7E+07 | 4.7E+07 | KD2-H4K8la_peak_3697 | 7.3993   |                                                    |
| 2 | 4.7E+07 | 4.7E+07 | KD2-H4K8la_peak_3698 | 15.7313  |                                                    |
| 2 | 4.7E+07 | 4.7E+07 | KD2-H4K8la_peak_3699 | 10.71653 |                                                    |
| 2 | 4.7E+07 | 4.7E+07 | KD2-H4K8la_peak_3700 | 5.43278  |                                                    |
| 2 | 4.7E+07 | 4.7E+07 | KD2-H4K8la_peak_3701 | 8.66164  |                                                    |
| 2 | 4.7E+07 | 4.7E+07 | KD2-H4K8la_peak_3702 | 8.66164  |                                                    |
| 2 | 4.7E+07 | 4.7E+07 | KD2-H4K8la_peak_3703 | 9.20163  |                                                    |
| 2 | 4.7E+07 | 4.7E+07 | KD2-H4K8la_peak_3704 | 10.49982 |                                                    |
| 2 | 4.7E+07 | 4.7E+07 | KD2-H4K8la_peak_3705 | 14.23294 |                                                    |
| 2 | 4.7E+07 | 4.7E+07 | KD2-H4K8la_peak_3706 | 9.5329   | RP11-761B3.1_ENSG00000273269;CALM2_ENSG00000143933 |
| 2 | 4.7E+07 | 4.7E+07 | KD2-H4K8la_peak_3707 | 7.49897  |                                                    |
| 2 | 4.7E+07 | 4.7E+07 | KD2-H4K8la_peak_3708 | 11.00891 |                                                    |
| 2 | 4.7E+07 | 4.7E+07 | KD2-H4K8la_peak_3709 | 8.13557  |                                                    |
| 2 | 4.8E+07 | 4.8E+07 | KD2-H4K8la_peak_3710 | 6.86458  |                                                    |
| 2 | 4.8E+07 | 4.8E+07 | KD2-H4K8la_peak_3711 | 7.23932  |                                                    |
| 2 | 4.8E+07 | 4.8E+07 | KD2-H4K8la_peak_3712 | 8.77961  | MSH2_ENSG00000095002                               |
| 2 | 4.8E+07 | 4.8E+07 | KD2-H4K8la_peak_3713 | 9.44217  |                                                    |
| 2 | 4.8E+07 | 4.8E+07 | KD2-H4K8la_peak_3714 | 6.71169  | RNU6-688P_ENSG00000251872                          |
| 2 | 4.8E+07 | 4.8E+07 | KD2-H4K8la_peak_3715 | 12.62032 |                                                    |
| 2 | 5.5E+07 | 5.5E+07 | KD2-H4K8la_peak_3716 | 6.64804  |                                                    |
| 2 | 6.1E+07 | 6.1E+07 | KD2-H4K8la_peak_3717 | 6.28277  | AC010733.4_ENSG00000228414;REL_ENSG00000162924     |
| 2 | 6.1E+07 | 6.1E+07 | KD2-H4K8la_peak_3718 | 7.83588  | AHSA2_ENSG00000173209                              |
| 2 | 6.4E+07 | 6.4E+07 | KD2-H4K8la_peak_3719 | 7.30722  | VPS54_ENSG00000143952                              |
| 2 | 6.5E+07 | 6.5E+07 | KD2-H4K8la_peak_3720 | 6.64804  | AC008074.3_ENSG00000223935;LGALS1L_ENSG00000119862 |
| 2 | 6.5E+07 | 6.5E+07 | KD2-H4K8la_peak_3721 | 6.89612  |                                                    |
| 2 | 6.5E+07 | 6.5E+07 | KD2-H4K8la_peak_3722 | 6.3399   |                                                    |
| 2 | 6.5E+07 | 6.5E+07 | KD2-H4K8la_peak_3723 | 10.87898 |                                                    |
| 2 | 6.5E+07 | 6.5E+07 | KD2-H4K8la_peak_3724 | 11.40266 | SLC1A4_ENSG00000115902                             |

|   |         |         |                      |          |                                                          |
|---|---------|---------|----------------------|----------|----------------------------------------------------------|
| 2 | 6.6E+07 | 6.6E+07 | KD2-H4K8la_peak_3725 | 7.60756  |                                                          |
| 2 | 6.7E+07 | 6.7E+07 | KD2-H4K8la_peak_3726 | 6.0136   | MEIS1-AS3_ENSG00000226819;MEIS1_ENSG00000143995          |
| 2 | 6.8E+07 | 6.8E+07 | KD2-H4K8la_peak_3727 | 8.60796  |                                                          |
| 2 | 6.8E+07 | 6.8E+07 | KD2-H4K8la_peak_3728 | 10.16645 | RP11-474G23.3_ENSG00000273064                            |
| 2 | 6.9E+07 | 6.9E+07 | KD2-H4K8la_peak_3729 | 8.76116  |                                                          |
| 2 | 7E+07   | 7E+07   | KD2-H4K8la_peak_3730 | 8.76116  | NFU1_ENSG00000169599                                     |
| 2 | 7E+07   | 7E+07   | KD2-H4K8la_peak_3731 | 6.83387  |                                                          |
| 2 | 7E+07   | 7E+07   | KD2-H4K8la_peak_3732 | 10.20357 | AC016700.5_ENSG00000231327                               |
| 2 | 7E+07   | 7E+07   | KD2-H4K8la_peak_3733 | 14.61815 | AC016700.5_ENSG00000231327                               |
| 2 | 7E+07   | 7E+07   | KD2-H4K8la_peak_3734 | 23.67682 |                                                          |
| 2 | 7E+07   | 7E+07   | KD2-H4K8la_peak_3735 | 9.14903  |                                                          |
| 2 | 7E+07   | 7E+07   | KD2-H4K8la_peak_3736 | 12.06531 | C2orf42_ENSG00000115998;TIA1_ENSG00000116001             |
| 2 | 7.1E+07 | 7.1E+07 | KD2-H4K8la_peak_3737 | 13.79336 | SNRPG_ENSG00000143977                                    |
| 2 | 7.1E+07 | 7.1E+07 | KD2-H4K8la_peak_3738 | 6.72733  |                                                          |
| 2 | 7.3E+07 | 7.3E+07 | KD2-H4K8la_peak_3739 | 13.1338  | SMYD5_ENSG00000135632                                    |
| 2 | 7.3E+07 | 7.3E+07 | KD2-H4K8la_peak_3740 | 6.64804  | CCT7_ENSG00000135624                                     |
| 2 | 7.4E+07 | 7.4E+07 | KD2-H4K8la_peak_3741 | 9.27415  | FBXO41_ENSG00000163013                                   |
| 2 | 7.4E+07 | 7.4E+07 | KD2-H4K8la_peak_3742 | 5.52913  | STAMBP_ENSG00000124356                                   |
| 2 | 7.4E+07 | 7.4E+07 | KD2-H4K8la_peak_3743 | 8.8293   | AC073046.25_ENSG00000235499                              |
| 2 | 7.4E+07 | 7.4E+07 | KD2-H4K8la_peak_3744 | 9.84972  | AC073046.25_ENSG00000235499;RP11-711M9.1_ENSG00000255989 |
| 2 | 7.4E+07 | 7.4E+07 | KD2-H4K8la_peak_3745 | 7.81267  | BOLA3_ENSG00000163170;BOLA3-AS1_ENSG00000225439          |
| 2 | 7.4E+07 | 7.4E+07 | KD2-H4K8la_peak_3746 | 12.14568 | MTHFD2_ENSG00000065911                                   |
| 2 | 7.5E+07 | 7.5E+07 | KD2-H4K8la_peak_3747 | 6.96161  | DCTN1_ENSG00000204843                                    |
| 2 | 7.5E+07 | 7.5E+07 | KD2-H4K8la_peak_3748 | 5.99671  |                                                          |
| 2 | 7.5E+07 | 7.5E+07 | KD2-H4K8la_peak_3749 | 6.51326  | MRPL53_ENSG00000204822                                   |
| 2 | 7.5E+07 | 7.5E+07 | KD2-H4K8la_peak_3750 | 9.6708   | PCGF1_ENSG00000115289                                    |
| 2 | 7.5E+07 | 7.5E+07 | KD2-H4K8la_peak_3751 | 7.49467  | TLX2_ENSG00000115297                                     |
| 2 | 7.5E+07 | 7.5E+07 | KD2-H4K8la_peak_3752 | 5.90392  | DOK1_ENSG00000115325                                     |
| 2 | 7.5E+07 | 7.5E+07 | KD2-H4K8la_peak_3753 | 7.49467  | RP11-259N19.1_ENSG00000272711;HK2_ENSG00000159399        |
| 2 | 7.6E+07 | 7.6E+07 | KD2-H4K8la_peak_3754 | 6.56573  |                                                          |
| 2 | 7.7E+07 | 7.7E+07 | KD2-H4K8la_peak_3755 | 8.65116  |                                                          |
| 2 | 7.9E+07 | 7.9E+07 | KD2-H4K8la_peak_3756 | 4.79631  |                                                          |
| 2 | 8.5E+07 | 8.5E+07 | KD2-H4K8la_peak_3757 | 5.40949  |                                                          |
| 2 | 8.5E+07 | 8.5E+07 | KD2-H4K8la_peak_3758 | 6.64804  | KCMF1_ENSG00000176407                                    |
| 2 | 8.5E+07 | 8.5E+07 | KD2-H4K8la_peak_3759 | 7.8597   | KCMF1_ENSG00000176407                                    |
| 2 | 8.5E+07 | 8.5E+07 | KD2-H4K8la_peak_3760 | 6.71169  |                                                          |
| 2 | 8.5E+07 | 8.5E+07 | KD2-H4K8la_peak_3761 | 6.75548  |                                                          |
| 2 | 8.6E+07 | 8.6E+07 | KD2-H4K8la_peak_3762 | 8.59561  | CAPG_ENSG00000042493;SH2D6_ENSG00000152292               |
| 2 | 8.6E+07 | 8.6E+07 | KD2-H4K8la_peak_3763 | 10.37746 |                                                          |
| 2 | 8.6E+07 | 8.6E+07 | KD2-H4K8la_peak_3764 | 4.67224  |                                                          |
| 2 | 8.6E+07 | 8.6E+07 | KD2-H4K8la_peak_3765 | 5.11209  |                                                          |
| 2 | 8.6E+07 | 8.6E+07 | KD2-H4K8la_peak_3766 | 12.67978 |                                                          |
| 2 | 8.6E+07 | 8.6E+07 | KD2-H4K8la_peak_3767 | 5.90392  | VAMP5_ENSG00000168899                                    |
| 2 | 8.6E+07 | 8.6E+07 | KD2-H4K8la_peak_3768 | 4.75945  | C2orf68_ENSG00000168887                                  |
| 2 | 8.6E+07 | 8.6E+07 | KD2-H4K8la_peak_3769 | 6.70058  |                                                          |
| 2 | 8.6E+07 | 8.6E+07 | KD2-H4K8la_peak_3770 | 5.45079  |                                                          |

|   |         |         |                      |          |                                                  |
|---|---------|---------|----------------------|----------|--------------------------------------------------|
| 2 | 8.6E+07 | 8.6E+07 | KD2-H4K8la_peak_3771 | 5.83285  | MRPL35_ENSG00000132313                           |
| 2 | 8.8E+07 | 8.8E+07 | KD2-H4K8la_peak_3772 | 6.01825  |                                                  |
| 2 | 8.8E+07 | 8.8E+07 | KD2-H4K8la_peak_3773 | 7.72421  |                                                  |
| 2 | 9.2E+07 | 9.2E+07 | KD2-H4K8la_peak_3774 | 5.14539  |                                                  |
| 2 | 9.2E+07 | 9.2E+07 | KD2-H4K8la_peak_3775 | 6.64532  |                                                  |
| 2 | 9.2E+07 | 9.2E+07 | KD2-H4K8la_peak_3776 | 8.74373  |                                                  |
| 2 | 9.6E+07 | 9.6E+07 | KD2-H4K8la_peak_3777 | 5.30989  |                                                  |
| 2 | 9.7E+07 | 9.7E+07 | KD2-H4K8la_peak_3778 | 10.99007 | ANKRD36C_ENSG00000174501                         |
| 2 | 9.7E+07 | 9.7E+07 | KD2-H4K8la_peak_3779 | 5.84082  | FAHD2CP_ENSG00000231584                          |
| 2 | 9.7E+07 | 9.7E+07 | KD2-H4K8la_peak_3780 | 11.44733 | DUSP2_ENSG00000158050;AC012307.2_ENSG00000228873 |
| 2 | 9.7E+07 | 9.7E+07 | KD2-H4K8la_peak_3781 | 6.64804  | NCAPH_ENSG00000121152                            |
| 2 | 9.7E+07 | 9.7E+07 | KD2-H4K8la_peak_3782 | 5.99671  |                                                  |
| 2 | 9.8E+07 | 9.8E+07 | KD2-H4K8la_peak_3783 | 6.83927  | ANKRD23_ENSG00000163126;ANKRD39_ENSG00000213337  |
| 2 | 9.8E+07 | 9.8E+07 | KD2-H4K8la_peak_3784 | 8.76116  |                                                  |
| 2 | 9.8E+07 | 9.8E+07 | KD2-H4K8la_peak_3785 | 7.65547  | SEMA4C_ENSG00000168758                           |
| 2 | 9.8E+07 | 9.8E+07 | KD2-H4K8la_peak_3786 | 9.72904  | FAHD2B_ENSG00000144199                           |
| 2 | 9.9E+07 | 9.9E+07 | KD2-H4K8la_peak_3787 | 7.8597   | TMEM131_ENSG00000075568                          |
| 2 | 9.9E+07 | 9.9E+07 | KD2-H4K8la_peak_3788 | 9.27415  |                                                  |
| 2 | 1E+08   | 1E+08   | KD2-H4K8la_peak_3789 | 6.56656  |                                                  |
| 2 | 1E+08   | 1E+08   | KD2-H4K8la_peak_3790 | 5.67034  | AC092667.2_ENSG00000230393                       |
| 2 | 1E+08   | 1E+08   | KD2-H4K8la_peak_3791 | 14.33193 | AC016738.4_ENSG00000223947;RPL31_ENSG00000071082 |
| 2 | 1E+08   | 1E+08   | KD2-H4K8la_peak_3792 | 5.58883  | TBC1D8_ENSG00000204634;CNOT11_ENSG00000158435    |
| 2 | 1E+08   | 1E+08   | KD2-H4K8la_peak_3793 | 12.13455 | RNF149_ENSG00000163162                           |
| 2 | 1E+08   | 1E+08   | KD2-H4K8la_peak_3794 | 7.64828  | MAP4K4_ENSG00000071054                           |
| 2 | 1E+08   | 1E+08   | KD2-H4K8la_peak_3795 | 6.61963  | MAP4K4_ENSG00000071054                           |
| 2 | 1.1E+08 | 1.1E+08 | KD2-H4K8la_peak_3796 | 6.0136   |                                                  |
| 2 | 1.1E+08 | 1.1E+08 | KD2-H4K8la_peak_3797 | 5.28047  |                                                  |
| 2 | 1.1E+08 | 1.1E+08 | KD2-H4K8la_peak_3798 | 10.44395 |                                                  |
| 2 | 1.1E+08 | 1.1E+08 | KD2-H4K8la_peak_3799 | 6.64804  |                                                  |
| 2 | 1.1E+08 | 1.1E+08 | KD2-H4K8la_peak_3800 | 7.13237  | NPHP1_ENSG00000144061                            |
| 2 | 1.1E+08 | 1.1E+08 | KD2-H4K8la_peak_3801 | 6.61963  |                                                  |
| 2 | 1.1E+08 | 1.1E+08 | KD2-H4K8la_peak_3802 | 5.05146  |                                                  |
| 2 | 1.1E+08 | 1.1E+08 | KD2-H4K8la_peak_3803 | 6.2278   |                                                  |
| 2 | 1.1E+08 | 1.1E+08 | KD2-H4K8la_peak_3804 | 12.13455 | ZC3H6_ENSG00000188177                            |
| 2 | 1.1E+08 | 1.1E+08 | KD2-H4K8la_peak_3805 | 5.83285  | CHCHD5_ENSG00000125611                           |
| 2 | 1.1E+08 | 1.1E+08 | KD2-H4K8la_peak_3806 | 7.83588  |                                                  |
| 2 | 1.1E+08 | 1.1E+08 | KD2-H4K8la_peak_3807 | 27.75889 | MIR1302-3_ENSG00000221055;WASH2P_ENSG00000146556 |
| 2 | 1.1E+08 | 1.1E+08 | KD2-H4K8la_peak_3808 | 5.36015  |                                                  |
| 2 | 1.2E+08 | 1.2E+08 | KD2-H4K8la_peak_3809 | 7.49467  |                                                  |
| 2 | 1.2E+08 | 1.2E+08 | KD2-H4K8la_peak_3810 | 8.07102  | TMEM177_ENSG00000144120                          |
| 2 | 1.2E+08 | 1.2E+08 | KD2-H4K8la_peak_3811 | 7.3993   | TMEM185B_ENSG00000226479                         |
| 2 | 1.2E+08 | 1.2E+08 | KD2-H4K8la_peak_3812 | 8.00569  | TMEM185B_ENSG00000226479                         |
| 2 | 1.2E+08 | 1.2E+08 | KD2-H4K8la_peak_3813 | 8.13557  |                                                  |
| 2 | 1.2E+08 | 1.2E+08 | KD2-H4K8la_peak_3814 | 8.98765  |                                                  |
| 2 | 1.2E+08 | 1.2E+08 | KD2-H4K8la_peak_3815 | 8.37064  | NIFK_ENSG00000155438;TSN_ENSG00000211460         |
| 2 | 1.3E+08 | 1.3E+08 | KD2-H4K8la_peak_3816 | 4.3268   |                                                  |

|   |         |         |                      |          |                                                                        |
|---|---------|---------|----------------------|----------|------------------------------------------------------------------------|
| 2 | 1.3E+08 | 1.3E+08 | KD2-H4K8la_peak_3817 | 8.944    | RP11-521O16.1_ENSG00000260634;RP11-521O16.2_ENSG00000260163            |
| 2 | 1.3E+08 | 1.3E+08 | KD2-H4K8la_peak_3818 | 5.83285  | CYP27C1_ENSG00000186684                                                |
| 2 | 1.3E+08 | 1.3E+08 | KD2-H4K8la_peak_3819 | 6.11881  | ERCC3_ENSG00000163161                                                  |
| 2 | 1.3E+08 | 1.3E+08 | KD2-H4K8la_peak_3820 | 13.20018 | MAP3K2_ENSG00000169967                                                 |
| 2 | 1.3E+08 | 1.3E+08 | KD2-H4K8la_peak_3821 | 7.13237  |                                                                        |
| 2 | 1.3E+08 | 1.3E+08 | KD2-H4K8la_peak_3822 | 7.90495  |                                                                        |
| 2 | 1.3E+08 | 1.3E+08 | KD2-H4K8la_peak_3823 | 7.23932  |                                                                        |
| 2 | 1.3E+08 | 1.3E+08 | KD2-H4K8la_peak_3824 | 6.31081  |                                                                        |
| 2 | 1.3E+08 | 1.3E+08 | KD2-H4K8la_peak_3825 | 8.23729  |                                                                        |
| 2 | 1.3E+08 | 1.3E+08 | KD2-H4K8la_peak_3826 | 5.36015  |                                                                        |
| 2 | 1.3E+08 | 1.3E+08 | KD2-H4K8la_peak_3827 | 6.64804  |                                                                        |
| 2 | 1.3E+08 | 1.3E+08 | KD2-H4K8la_peak_3828 | 6.70626  |                                                                        |
| 2 | 1.3E+08 | 1.3E+08 | KD2-H4K8la_peak_3829 | 5.48416  |                                                                        |
| 2 | 1.3E+08 | 1.3E+08 | KD2-H4K8la_peak_3830 | 6.01825  |                                                                        |
| 2 | 1.3E+08 | 1.3E+08 | KD2-H4K8la_peak_3831 | 6.04899  |                                                                        |
| 2 | 1.3E+08 | 1.3E+08 | KD2-H4K8la_peak_3832 | 9.23478  | AC079776.1_ENSG00000229536                                             |
| 2 | 1.3E+08 | 1.3E+08 | KD2-H4K8la_peak_3833 | 9.0413   | AC133785.1_ENSG00000233221;ARHGFE4_ENSG00000136002                     |
| 2 | 1.3E+08 | 1.3E+08 | KD2-H4K8la_peak_3834 | 4.92443  | FAM168B_ENSG00000152102                                                |
| 2 | 1.3E+08 | 1.3E+08 | KD2-H4K8la_peak_3835 | 8.24908  |                                                                        |
| 2 | 1.3E+08 | 1.3E+08 | KD2-H4K8la_peak_3836 | 7.99461  | FAM201B_ENSG00000230992                                                |
| 2 | 1.3E+08 | 1.3E+08 | KD2-H4K8la_peak_3837 | 7.23116  |                                                                        |
| 2 | 1.4E+08 | 1.4E+08 | KD2-H4K8la_peak_3838 | 10.99007 | MCM6_ENSG00000076003                                                   |
| 2 | 1.4E+08 | 1.4E+08 | KD2-H4K8la_peak_3839 | 8.66164  | DARS_ENSG00000115866;AC093391.2_ENSG00000231890                        |
| 2 | 1.4E+08 | 1.4E+08 | KD2-H4K8la_peak_3840 | 7.72421  |                                                                        |
| 2 | 1.5E+08 | 1.5E+08 | KD2-H4K8la_peak_3841 | 4.86896  | ACVR2A_ENSG00000121989                                                 |
| 2 | 1.5E+08 | 1.5E+08 | KD2-H4K8la_peak_3842 | 8.35736  |                                                                        |
| 2 | 1.5E+08 | 1.5E+08 | KD2-H4K8la_peak_3843 | 7.13237  |                                                                        |
| 2 | 1.5E+08 | 1.5E+08 | KD2-H4K8la_peak_3844 | 5.05146  | PRPF40A_ENSG00000196504;ARL6IP6_ENSG00000177917                        |
| 2 | 1.6E+08 | 1.6E+08 | KD2-H4K8la_peak_3845 | 5.43278  | BAZ2B_ENSG00000123636;AC009506.1_ENSG00000224152                       |
| 2 | 1.6E+08 | 1.6E+08 | KD2-H4K8la_peak_3846 | 4.30663  |                                                                        |
| 2 | 1.6E+08 | 1.6E+08 | KD2-H4K8la_peak_3847 | 11.06859 | RBMS1_ENSG00000153250                                                  |
| 2 | 1.7E+08 | 1.7E+08 | KD2-H4K8la_peak_3848 | 4.53273  | SCN9A_ENSG00000169432                                                  |
| 2 | 1.7E+08 | 1.7E+08 | KD2-H4K8la_peak_3849 | 6.11881  | PPIG_ENSG00000138398                                                   |
| 2 | 1.7E+08 | 1.7E+08 | KD2-H4K8la_peak_3850 | 4.53273  |                                                                        |
| 2 | 1.7E+08 | 1.7E+08 | KD2-H4K8la_peak_3851 | 10.11868 |                                                                        |
| 2 | 1.7E+08 | 1.7E+08 | KD2-H4K8la_peak_3852 | 8.39813  | HAT1_ENSG00000128708                                                   |
| 2 | 1.7E+08 | 1.7E+08 | KD2-H4K8la_peak_3853 | 8.59561  | MLTK_ENSG00000091436                                                   |
| 2 | 1.7E+08 | 1.7E+08 | KD2-H4K8la_peak_3854 | 10.87112 | SP3_ENSG00000172845                                                    |
| 2 | 1.7E+08 | 1.7E+08 | KD2-H4K8la_peak_3855 | 8.89364  | RP11-394I13.1_ENSG00000260868                                          |
| 2 | 1.8E+08 | 1.8E+08 | KD2-H4K8la_peak_3856 | 6.64804  | OLA1_ENSG00000138430                                                   |
| 2 | 1.8E+08 | 1.8E+08 | KD2-H4K8la_peak_3857 | 9.86881  |                                                                        |
| 2 | 1.8E+08 | 1.8E+08 | KD2-H4K8la_peak_3858 | 8.07044  |                                                                        |
| 2 | 1.8E+08 | 1.8E+08 | KD2-H4K8la_peak_3859 | 6.25288  | ATF2_ENSG00000115966;MIR933_ENSG00000215973;AC096649.2_ENSG00000229750 |
| 2 | 1.8E+08 | 1.8E+08 | KD2-H4K8la_peak_3860 | 6.0136   | HOXD9_ENSG00000128709                                                  |
| 2 | 1.8E+08 | 1.8E+08 | KD2-H4K8la_peak_3861 | 10.47118 | LINC01116_ENSG00000163364;LINC01117_ENSG00000224577                    |
| 2 | 1.8E+08 | 1.8E+08 | KD2-H4K8la_peak_3862 | 6.26214  | AC079305.10_ENSG00000222043                                            |

|   |         |         |                      |          |                                                     |
|---|---------|---------|----------------------|----------|-----------------------------------------------------|
| 2 | 1.8E+08 | 1.8E+08 | KD2-H4K8la_peak_3863 | 6.3399   | AC009948.5_ENSG00000223960                          |
| 2 | 1.8E+08 | 1.8E+08 | KD2-H4K8la_peak_3864 | 8.76116  | PRKRA_ENSG00000180228;DFNB59_ENSG00000204311        |
| 2 | 1.8E+08 | 1.8E+08 | KD2-H4K8la_peak_3865 | 16.13355 | AC104076.3_ENSG00000236153                          |
| 2 | 1.8E+08 | 1.8E+08 | KD2-H4K8la_peak_3866 | 4.94337  |                                                     |
| 2 | 1.8E+08 | 1.8E+08 | KD2-H4K8la_peak_3867 | 9.0413   | AC013733.3_ENSG00000234595                          |
| 2 | 1.9E+08 | 1.9E+08 | KD2-H4K8la_peak_3868 | 7.52934  | WDR75_ENSG00000115368                               |
| 2 | 1.9E+08 | 1.9E+08 | KD2-H4K8la_peak_3869 | 7.8597   |                                                     |
| 2 | 1.9E+08 | 1.9E+08 | KD2-H4K8la_peak_3870 | 8.37064  |                                                     |
| 2 | 1.9E+08 | 1.9E+08 | KD2-H4K8la_peak_3871 | 7.60756  | ANKAR_ENSG00000151687                               |
| 2 | 1.9E+08 | 1.9E+08 | KD2-H4K8la_peak_3872 | 4.53273  | OSGEPL1_ENSG00000128694;OSGEPL1-AS1_ENSG00000253559 |
| 2 | 1.9E+08 | 1.9E+08 | KD2-H4K8la_peak_3873 | 8.77936  |                                                     |
| 2 | 1.9E+08 | 1.9E+08 | KD2-H4K8la_peak_3874 | 4.86896  |                                                     |
| 2 | 1.9E+08 | 1.9E+08 | KD2-H4K8la_peak_3875 | 9.77662  | TMEM194B_ENSG00000189362;AC093388.3_ENSG00000233654 |
| 2 | 1.9E+08 | 1.9E+08 | KD2-H4K8la_peak_3876 | 6.96161  |                                                     |
| 2 | 2E+08   | 2E+08   | KD2-H4K8la_peak_3877 | 10.34978 |                                                     |
| 2 | 2E+08   | 2E+08   | KD2-H4K8la_peak_3878 | 8.39919  | HECW2_ENSG00000138411                               |
| 2 | 2E+08   | 2E+08   | KD2-H4K8la_peak_3879 | 5.72892  |                                                     |
| 2 | 2E+08   | 2E+08   | KD2-H4K8la_peak_3880 | 9.37576  |                                                     |
| 2 | 2E+08   | 2E+08   | KD2-H4K8la_peak_3881 | 7.61406  |                                                     |
| 2 | 2E+08   | 2E+08   | KD2-H4K8la_peak_3882 | 7.04184  |                                                     |
| 2 | 2E+08   | 2E+08   | KD2-H4K8la_peak_3883 | 8.07102  | TYW5_ENSG00000162971;C2orf47_ENSG00000162972        |
| 2 | 2E+08   | 2E+08   | KD2-H4K8la_peak_3884 | 4.90979  | ORC2_ENSG00000115942;AC005037.3_ENSG00000183308     |
| 2 | 2E+08   | 2E+08   | KD2-H4K8la_peak_3885 | 8.24908  | CFLAR_ENSG00000003402                               |
| 2 | 2E+08   | 2E+08   | KD2-H4K8la_peak_3886 | 5.83285  | TRAK2_ENSG00000115993                               |
| 2 | 2E+08   | 2E+08   | KD2-H4K8la_peak_3887 | 7.23932  |                                                     |
| 2 | 2E+08   | 2E+08   | KD2-H4K8la_peak_3888 | 8.86558  |                                                     |
| 2 | 2E+08   | 2E+08   | KD2-H4K8la_peak_3889 | 7.13237  | SUMO1_ENSG00000116030;AC079354.2_ENSG00000267889    |
| 2 | 2E+08   | 2E+08   | KD2-H4K8la_peak_3890 | 4.86896  | SUMO1_ENSG00000116030;AC079354.2_ENSG00000267889    |
| 2 | 2E+08   | 2E+08   | KD2-H4K8la_peak_3891 | 7.12014  | NOP58_ENSG00000055044                               |
| 2 | 2E+08   | 2E+08   | KD2-H4K8la_peak_3892 | 11.15747 | CYP20A1_ENSG00000119004                             |
| 2 | 2.1E+08 | 2.1E+08 | KD2-H4K8la_peak_3893 | 8.50453  | PARD3B_ENSG00000116117                              |
| 2 | 2.1E+08 | 2.1E+08 | KD2-H4K8la_peak_3894 | 8.16787  | INO80D_ENSG00000114933;AC007383.3_ENSG00000227946   |
| 2 | 2.1E+08 | 2.1E+08 | KD2-H4K8la_peak_3895 | 5.7631   | ADAM23_ENSG00000114948                              |
| 2 | 2.1E+08 | 2.1E+08 | KD2-H4K8la_peak_3896 | 5.16795  |                                                     |
| 2 | 2.1E+08 | 2.1E+08 | KD2-H4K8la_peak_3897 | 7.94013  | KLF7_ENSG00000118263                                |
| 2 | 2.1E+08 | 2.1E+08 | KD2-H4K8la_peak_3898 | 11.55297 |                                                     |
| 2 | 2.1E+08 | 2.1E+08 | KD2-H4K8la_peak_3899 | 7.72421  |                                                     |
| 2 | 2.1E+08 | 2.1E+08 | KD2-H4K8la_peak_3900 | 9.11321  | AC007879.5_ENSG00000223725;CREB1_ENSG00000118260    |
| 2 | 2.1E+08 | 2.1E+08 | KD2-H4K8la_peak_3901 | 9.20163  | METTL21A_ENSG00000144401                            |
| 2 | 2.1E+08 | 2.1E+08 | KD2-H4K8la_peak_3902 | 6.2278   | PLEKHM3_ENSG00000178385                             |
| 2 | 2.1E+08 | 2.1E+08 | KD2-H4K8la_peak_3903 | 10.68716 | IDH1_ENSG00000138413;PIKFYVE_ENSG00000115020        |
| 2 | 2.2E+08 | 2.2E+08 | KD2-H4K8la_peak_3904 | 5.83285  | ATIC_ENSG00000138363                                |
| 2 | 2.2E+08 | 2.2E+08 | KD2-H4K8la_peak_3905 | 5.05146  | FN1_ENSG00000115414;AC012462.1_ENSG00000230695      |
| 2 | 2.2E+08 | 2.2E+08 | KD2-H4K8la_peak_3906 | 5.36015  | XRCC5_ENSG00000079246                               |
| 2 | 2.2E+08 | 2.2E+08 | KD2-H4K8la_peak_3907 | 7.49467  |                                                     |
| 2 | 2.2E+08 | 2.2E+08 | KD2-H4K8la_peak_3908 | 6.89612  |                                                     |

|   |         |         |                      |          |                                                                              |
|---|---------|---------|----------------------|----------|------------------------------------------------------------------------------|
| 2 | 2.2E+08 | 2.2E+08 | KD2-H4K8la_peak_3909 | 8.62669  |                                                                              |
| 2 | 2.2E+08 | 2.2E+08 | KD2-H4K8la_peak_3910 | 6.47589  | RUFY4_ENSG00000188282                                                        |
| 2 | 2.2E+08 | 2.2E+08 | KD2-H4K8la_peak_3911 | 7.83588  | ARPC2_ENSG00000163466                                                        |
| 2 | 2.2E+08 | 2.2E+08 | KD2-H4K8la_peak_3912 | 9.20163  | CTDSP1_ENSG00000144579;RP11-378A13.2_ENSG00000273361                         |
| 2 | 2.2E+08 | 2.2E+08 | KD2-H4K8la_peak_3913 | 8.76116  | RNF25_ENSG00000163481;STK36_ENSG00000163482                                  |
| 2 | 2.2E+08 | 2.2E+08 | KD2-H4K8la_peak_3914 | 6.40658  | WNT10A_ENSG00000135925                                                       |
| 2 | 2.2E+08 | 2.2E+08 | KD2-H4K8la_peak_3915 | 5.43278  | AC097468.4_ENSG00000224090                                                   |
| 2 | 2.2E+08 | 2.2E+08 | KD2-H4K8la_peak_3916 | 7.49467  | FAM134A_ENSG00000144567                                                      |
| 2 | 2.2E+08 | 2.2E+08 | KD2-H4K8la_peak_3917 | 6.64804  | CNPPD1_ENSG00000115649                                                       |
| 2 | 2.2E+08 | 2.2E+08 | KD2-H4K8la_peak_3918 | 9.06396  | STK16_ENSG00000115661                                                        |
| 2 | 2.2E+08 | 2.2E+08 | KD2-H4K8la_peak_3919 | 7.41831  | DNAJB2_ENSG00000135924                                                       |
| 2 | 2.2E+08 | 2.2E+08 | KD2-H4K8la_peak_3920 | 4.30132  |                                                                              |
| 2 | 2.2E+08 | 2.2E+08 | KD2-H4K8la_peak_3921 | 10.27876 |                                                                              |
| 2 | 2.2E+08 | 2.2E+08 | KD2-H4K8la_peak_3922 | 9.38376  |                                                                              |
| 2 | 2.2E+08 | 2.2E+08 | KD2-H4K8la_peak_3923 | 6.11881  |                                                                              |
| 2 | 2.2E+08 | 2.2E+08 | KD2-H4K8la_peak_3924 | 5.83285  | RP11-316O14.1_ENSG00000268603;GMPPA_ENSG00000144591                          |
| 2 | 2.2E+08 | 2.2E+08 | KD2-H4K8la_peak_3925 | 9.70817  |                                                                              |
| 2 | 2.2E+08 | 2.2E+08 | KD2-H4K8la_peak_3926 | 8.76116  |                                                                              |
| 2 | 2.2E+08 | 2.2E+08 | KD2-H4K8la_peak_3927 | 5.6499   |                                                                              |
| 2 | 2.2E+08 | 2.2E+08 | KD2-H4K8la_peak_3928 | 6.64804  | SGPP2_ENSG00000163082                                                        |
| 2 | 2.2E+08 | 2.2E+08 | KD2-H4K8la_peak_3929 | 5.99671  | WDFY1_ENSG00000085449                                                        |
| 2 | 2.3E+08 | 2.3E+08 | KD2-H4K8la_peak_3930 | 8.86558  | CUL3_ENSG00000036257                                                         |
| 2 | 2.3E+08 | 2.3E+08 | KD2-H4K8la_peak_3931 | 5.72892  |                                                                              |
| 2 | 2.3E+08 | 2.3E+08 | KD2-H4K8la_peak_3932 | 7.49467  | RHBDD1_ENSG00000144468                                                       |
| 2 | 2.3E+08 | 2.3E+08 | KD2-H4K8la_peak_3933 | 4.69635  | RHBDD1_ENSG00000144468                                                       |
| 2 | 2.3E+08 | 2.3E+08 | KD2-H4K8la_peak_3934 | 8.487    | CAB39_ENSG00000135932                                                        |
| 2 | 2.3E+08 | 2.3E+08 | KD2-H4K8la_peak_3935 | 6.3399   |                                                                              |
| 2 | 2.3E+08 | 2.3E+08 | KD2-H4K8la_peak_3936 | 6.36118  | NCL_ENSG00000115053                                                          |
| 2 | 2.3E+08 | 2.3E+08 | KD2-H4K8la_peak_3937 | 8.13557  |                                                                              |
| 2 | 2.3E+08 | 2.3E+08 | KD2-H4K8la_peak_3938 | 10.98662 |                                                                              |
| 2 | 2.3E+08 | 2.3E+08 | KD2-H4K8la_peak_3939 | 11.99163 |                                                                              |
| 2 | 2.3E+08 | 2.3E+08 | KD2-H4K8la_peak_3940 | 10.16316 |                                                                              |
| 2 | 2.3E+08 | 2.3E+08 | KD2-H4K8la_peak_3941 | 10.87112 | MGC4771_ENSG00000269363;PTMA_ENSG00000187514                                 |
| 2 | 2.3E+08 | 2.3E+08 | KD2-H4K8la_peak_3942 | 11.50321 |                                                                              |
| 2 | 2.3E+08 | 2.3E+08 | KD2-H4K8la_peak_3943 | 16.8445  |                                                                              |
| 2 | 2.3E+08 | 2.3E+08 | KD2-H4K8la_peak_3944 | 5.52913  |                                                                              |
| 2 | 2.3E+08 | 2.3E+08 | KD2-H4K8la_peak_3945 | 8.487    | RP11-400N9.1_ENSG00000259793;DGKD_ENSG00000077044;AC019221.4_ENSG00000243637 |
| 2 | 2.3E+08 | 2.3E+08 | KD2-H4K8la_peak_3946 | 9.0413   |                                                                              |
| 2 | 2.4E+08 | 2.4E+08 | KD2-H4K8la_peak_3947 | 6.64804  |                                                                              |
| 2 | 2.4E+08 | 2.4E+08 | KD2-H4K8la_peak_3948 | 6.48366  |                                                                              |
| 2 | 2.4E+08 | 2.4E+08 | KD2-H4K8la_peak_3949 | 7.51302  |                                                                              |
| 2 | 2.4E+08 | 2.4E+08 | KD2-H4K8la_peak_3950 | 12.1221  | ARL4C_ENSG00000188042                                                        |
| 2 | 2.4E+08 | 2.4E+08 | KD2-H4K8la_peak_3951 | 8.93385  | SH3BP4_ENSG00000130147                                                       |
| 2 | 2.4E+08 | 2.4E+08 | KD2-H4K8la_peak_3952 | 6.75892  | AGAP1_ENSG00000157985                                                        |
| 2 | 2.4E+08 | 2.4E+08 | KD2-H4K8la_peak_3953 | 9.73848  | AC105760.2_ENSG00000227252;COPS8_ENSG00000198612                             |
| 2 | 2.4E+08 | 2.4E+08 | KD2-H4K8la_peak_3954 | 8.76116  |                                                                              |

|    |         |         |                      |          |                                                 |
|----|---------|---------|----------------------|----------|-------------------------------------------------|
| 2  | 2.4E+08 | 2.4E+08 | KD2-H4K8la_peak_3955 | 10.58561 |                                                 |
| 2  | 2.4E+08 | 2.4E+08 | KD2-H4K8la_peak_3956 | 13.91009 | LRRFIP1_ENSG00000124831                         |
| 2  | 2.4E+08 | 2.4E+08 | KD2-H4K8la_peak_3957 | 6.64804  | LRRFIP1_ENSG00000124831                         |
| 2  | 2.4E+08 | 2.4E+08 | KD2-H4K8la_peak_3958 | 6.47589  |                                                 |
| 2  | 2.4E+08 | 2.4E+08 | KD2-H4K8la_peak_3959 | 7.13528  | SNORD39_ENSG00000263723                         |
| 2  | 2.4E+08 | 2.4E+08 | KD2-H4K8la_peak_3960 | 5.33721  |                                                 |
| 2  | 2.4E+08 | 2.4E+08 | KD2-H4K8la_peak_3961 | 9.29385  |                                                 |
| 2  | 2.4E+08 | 2.4E+08 | KD2-H4K8la_peak_3962 | 14.25411 |                                                 |
| 2  | 2.4E+08 | 2.4E+08 | KD2-H4K8la_peak_3963 | 5.43278  |                                                 |
| 2  | 2.4E+08 | 2.4E+08 | KD2-H4K8la_peak_3964 | 5.43278  |                                                 |
| 2  | 2.4E+08 | 2.4E+08 | KD2-H4K8la_peak_3965 | 5.33301  | SCLY_ENSG00000132330                            |
| 2  | 2.4E+08 | 2.4E+08 | KD2-H4K8la_peak_3966 | 7.3993   | ASB1_ENSG00000065802;AC016999.2_ENSG00000229915 |
| 2  | 2.4E+08 | 2.4E+08 | KD2-H4K8la_peak_3967 | 4.86896  |                                                 |
| 2  | 2.4E+08 | 2.4E+08 | KD2-H4K8la_peak_3968 | 5.40949  |                                                 |
| 2  | 2.4E+08 | 2.4E+08 | KD2-H4K8la_peak_3969 | 5.52913  |                                                 |
| 2  | 2.4E+08 | 2.4E+08 | KD2-H4K8la_peak_3970 | 8.24671  |                                                 |
| 2  | 2.4E+08 | 2.4E+08 | KD2-H4K8la_peak_3971 | 6.3399   |                                                 |
| 2  | 2.4E+08 | 2.4E+08 | KD2-H4K8la_peak_3972 | 7.92775  |                                                 |
| 2  | 2.4E+08 | 2.4E+08 | KD2-H4K8la_peak_3973 | 7.12014  | NDUFA10_ENSG00000130414                         |
| 2  | 2.4E+08 | 2.4E+08 | KD2-H4K8la_peak_3974 | 6.14571  | AC110619.1_ENSG00000255735                      |
| 2  | 2.4E+08 | 2.4E+08 | KD2-H4K8la_peak_3975 | 6.69599  | ANKMY1_ENSG00000144504                          |
| 2  | 2.4E+08 | 2.4E+08 | KD2-H4K8la_peak_3976 | 4.86896  |                                                 |
| 2  | 2.4E+08 | 2.4E+08 | KD2-H4K8la_peak_3977 | 7.64828  | AC093585.6_ENSG00000229996                      |
| 2  | 2.4E+08 | 2.4E+08 | KD2-H4K8la_peak_3978 | 7.28641  | BOK-AS1_ENSG00000234235;BOK_ENSG00000176720     |
| 2  | 2.4E+08 | 2.4E+08 | KD2-H4K8la_peak_3979 | 7.47988  | BOK-AS1_ENSG00000234235;BOK_ENSG00000176720     |
| 2  | 2.4E+08 | 2.4E+08 | KD2-H4K8la_peak_3980 | 10.11868 | THAP4_ENSG00000176946;ATG4B_ENSG00000168397     |
| 2  | 2.4E+08 | 2.4E+08 | KD2-H4K8la_peak_3981 | 7.04184  |                                                 |
| 2  | 2.4E+08 | 2.4E+08 | KD2-H4K8la_peak_3982 | 5.24865  |                                                 |
| 2  | 2.4E+08 | 2.4E+08 | KD2-H4K8la_peak_3983 | 9.0516   | AC114730.5_ENSG00000215023                      |
| 2  | 2.4E+08 | 2.4E+08 | KD2-H4K8la_peak_3984 | 16.21274 |                                                 |
| 2  | 2.4E+08 | 2.4E+08 | KD2-H4K8la_peak_3985 | 8.44557  |                                                 |
| 2  | 2.4E+08 | 2.4E+08 | KD2-H4K8la_peak_3986 | 7.72421  | AC114730.2_ENSG00000235151                      |
| 2  | 2.4E+08 | 2.4E+08 | KD2-H4K8la_peak_3987 | 7.13237  | AC114730.2_ENSG00000235151                      |
| 2  | 2.4E+08 | 2.4E+08 | KD2-H4K8la_peak_3988 | 7.2823   |                                                 |
| 2  | 2.4E+08 | 2.4E+08 | KD2-H4K8la_peak_3989 | 7.49467  | AC131097.3_ENSG00000233806                      |
| 20 | 270738  | 270990  | KD2-H4K8la_peak_3990 | 13.3197  | C20orf96_ENSG00000196476                        |
| 20 | 307099  | 307491  | KD2-H4K8la_peak_3991 | 4.75945  | SOX12_ENSG00000177732                           |
| 20 | 389008  | 389385  | KD2-H4K8la_peak_3992 | 8.71024  | RBCK1_ENSG00000125826                           |
| 20 | 1447129 | 1447392 | KD2-H4K8la_peak_3993 | 7.81267  |                                                 |
| 20 | 2450907 | 2451278 | KD2-H4K8la_peak_3994 | 8.00569  | SNRPB_ENSG00000125835                           |
| 20 | 2505365 | 2505614 | KD2-H4K8la_peak_3995 | 7.83588  | ZNF343_ENSG00000088876                          |
| 20 | 2632700 | 2633007 | KD2-H4K8la_peak_3996 | 13.20018 | NOP56_ENSG00000101361;MIR1292_ENSG00000221062   |
| 20 | 2672875 | 2673165 | KD2-H4K8la_peak_3997 | 10.04111 | EBF4_ENSG00000088881                            |
| 20 | 2820542 | 2821241 | KD2-H4K8la_peak_3998 | 15.19386 | PCED1A_ENSG00000132635;VPS16_ENSG00000215305    |
| 20 | 3027161 | 3027363 | KD2-H4K8la_peak_3999 | 7.06427  | MRPS26_ENSG00000125901                          |
| 20 | 3748826 | 3749062 | KD2-H4K8la_peak_4000 | 9.9701   | C20orf27_ENSG00000101220                        |

|    |         |         |                      |          |                                                   |
|----|---------|---------|----------------------|----------|---------------------------------------------------|
| 20 | 3788646 | 3789017 | KD2-H4K8la_peak_4001 | 6.11881  |                                                   |
| 20 | 3792746 | 3792956 | KD2-H4K8la_peak_4002 | 6.0136   |                                                   |
| 20 | 3800214 | 3800664 | KD2-H4K8la_peak_4003 | 9.0413   | AP5S1_ENSG00000125843                             |
| 20 | 4152522 | 4152942 | KD2-H4K8la_peak_4004 | 5.58883  |                                                   |
| 20 | 4741755 | 4741998 | KD2-H4K8la_peak_4005 | 6.88801  |                                                   |
| 20 | 5093370 | 5093658 | KD2-H4K8la_peak_4006 | 5.58883  | TMEM230_ENSG00000089063                           |
| 20 | 5484741 | 5485028 | KD2-H4K8la_peak_4007 | 6.2278   | LINC00654_ENSG00000205181                         |
| 20 | 5730476 | 5730697 | KD2-H4K8la_peak_4008 | 5.6499   | C20orf196_ENSG00000171984                         |
| 20 | 8000072 | 8000314 | KD2-H4K8la_peak_4009 | 11.87032 | TMX4_ENSG00000125827;RP5-971N18.3_ENSG00000229766 |
| 20 | 1.1E+07 | 1.1E+07 | KD2-H4K8la_peak_4010 | 9.04068  |                                                   |
| 20 | 1.4E+07 | 1.4E+07 | KD2-H4K8la_peak_4011 | 5.40949  | ESF1_ENSG00000089048;NDUFAF5_ENSG00000101247      |
| 20 | 1.6E+07 | 1.6E+07 | KD2-H4K8la_peak_4012 | 7.72421  | AL121584.1_ENSG00000212111                        |
| 20 | 1.7E+07 | 1.7E+07 | KD2-H4K8la_peak_4013 | 7.61975  | SNRBP2_ENSG00000125870                            |
| 20 | 1.8E+07 | 1.8E+07 | KD2-H4K8la_peak_4014 | 9.86881  |                                                   |
| 20 | 1.8E+07 | 1.8E+07 | KD2-H4K8la_peak_4015 | 6.70626  | PET117_ENSG00000232838;CSRP2BP_ENSG00000149474    |
| 20 | 1.8E+07 | 1.8E+07 | KD2-H4K8la_peak_4016 | 11.45154 | PET117_ENSG00000232838;CSRP2BP_ENSG00000149474    |
| 20 | 1.8E+07 | 1.8E+07 | KD2-H4K8la_peak_4017 | 8.12466  | ZNF133_ENSG00000125846                            |
| 20 | 2E+07   | 2E+07   | KD2-H4K8la_peak_4018 | 14.52454 | C20orf26_ENSG00000089101                          |
| 20 | 2.1E+07 | 2.1E+07 | KD2-H4K8la_peak_4019 | 9.88732  |                                                   |
| 20 | 2.1E+07 | 2.1E+07 | KD2-H4K8la_peak_4020 | 7.49467  |                                                   |
| 20 | 2.1E+07 | 2.1E+07 | KD2-H4K8la_peak_4021 | 5.58883  | LINC00237_ENSG00000225127                         |
| 20 | 2.1E+07 | 2.1E+07 | KD2-H4K8la_peak_4022 | 5.58883  |                                                   |
| 20 | 2.3E+07 | 2.3E+07 | KD2-H4K8la_peak_4023 | 6.2278   | NAPB_ENSG00000125814                              |
| 20 | 2.4E+07 | 2.4E+07 | KD2-H4K8la_peak_4024 | 7.45264  | CST3_ENSG00000101439                              |
| 20 | 2.5E+07 | 2.5E+07 | KD2-H4K8la_peak_4025 | 5.27164  | ENTPD6_ENSG00000197586                            |
| 20 | 2.5E+07 | 2.5E+07 | KD2-H4K8la_peak_4026 | 7.28641  | PYGB_ENSG00000100994                              |
| 20 | 2.6E+07 | 2.6E+07 | KD2-H4K8la_peak_4027 | 11.15747 | NINL_ENSG00000101004                              |
| 20 | 2.6E+07 | 2.6E+07 | KD2-H4K8la_peak_4028 | 5.36015  | RP4-760C5.3_ENSG00000231081                       |
| 20 | 3E+07   | 3E+07   | KD2-H4K8la_peak_4029 | 6.47589  |                                                   |
| 20 | 3E+07   | 3E+07   | KD2-H4K8la_peak_4030 | 11.24937 | FRG1B_ENSG00000149531                             |
| 20 | 3E+07   | 3E+07   | KD2-H4K8la_peak_4031 | 9.07681  |                                                   |
| 20 | 3E+07   | 3E+07   | KD2-H4K8la_peak_4032 | 11.84538 | COX4I2_ENSG00000131055                            |
| 20 | 3E+07   | 3E+07   | KD2-H4K8la_peak_4033 | 8.944    | BCL2L1_ENSG00000171552                            |
| 20 | 3E+07   | 3E+07   | KD2-H4K8la_peak_4034 | 8.07102  |                                                   |
| 20 | 3.1E+07 | 3.1E+07 | KD2-H4K8la_peak_4035 | 7.37741  |                                                   |
| 20 | 3.1E+07 | 3.1E+07 | KD2-H4K8la_peak_4036 | 7.72421  |                                                   |
| 20 | 3.1E+07 | 3.1E+07 | KD2-H4K8la_peak_4037 | 6.20793  | TSPY26P_ENSG00000235217                           |
| 20 | 3.1E+07 | 3.1E+07 | KD2-H4K8la_peak_4038 | 10.20357 | POFUT1_ENSG00000101346                            |
| 20 | 3.1E+07 | 3.1E+07 | KD2-H4K8la_peak_4039 | 14.30153 |                                                   |
| 20 | 3.1E+07 | 3.1E+07 | KD2-H4K8la_peak_4040 | 10.04111 |                                                   |
| 20 | 3.1E+07 | 3.1E+07 | KD2-H4K8la_peak_4041 | 8.39919  |                                                   |
| 20 | 3.1E+07 | 3.1E+07 | KD2-H4K8la_peak_4042 | 9.27415  |                                                   |
| 20 | 3.1E+07 | 3.1E+07 | KD2-H4K8la_peak_4043 | 5.49688  |                                                   |
| 20 | 3.1E+07 | 3.1E+07 | KD2-H4K8la_peak_4044 | 9.37576  |                                                   |
| 20 | 3.1E+07 | 3.1E+07 | KD2-H4K8la_peak_4045 | 8.12466  | MAPRE1_ENSG00000101367                            |
| 20 | 3.2E+07 | 3.2E+07 | KD2-H4K8la_peak_4046 | 5.43278  |                                                   |



|    |         |         |                      |          |                                                                                  |
|----|---------|---------|----------------------|----------|----------------------------------------------------------------------------------|
| 20 | 3.2E+07 | 3.2E+07 | KD2-H4K8la_peak_4047 | 7.13185  |                                                                                  |
| 20 | 3.2E+07 | 3.2E+07 | KD2-H4K8la_peak_4048 | 12.14099 | PXMP4_ENSG00000101417                                                            |
| 20 | 3.2E+07 | 3.2E+07 | KD2-H4K8la_peak_4049 | 5.58883  | RP4-553F4.2_ENSG00000229188;ZNF341_ENSG00000131061                               |
| 20 | 3.2E+07 | 3.2E+07 | KD2-H4K8la_peak_4050 | 7.39473  |                                                                                  |
| 20 | 3.2E+07 | 3.2E+07 | KD2-H4K8la_peak_4051 | 9.81238  |                                                                                  |
| 20 | 3.3E+07 | 3.3E+07 | KD2-H4K8la_peak_4052 | 4.94337  | ITCH_ENSG00000078747                                                             |
| 20 | 3.4E+07 | 3.4E+07 | KD2-H4K8la_peak_4053 | 5.83285  | GSS_ENSG00000100983                                                              |
| 20 | 3.4E+07 | 3.4E+07 | KD2-H4K8la_peak_4054 | 8.07102  |                                                                                  |
| 20 | 3.4E+07 | 3.4E+07 | KD2-H4K8la_peak_4055 | 5.10388  | TRPC4AP_ENSG00000100991                                                          |
| 20 | 3.4E+07 | 3.4E+07 | KD2-H4K8la_peak_4056 | 6.20793  | UQCC1_ENSG00000101019                                                            |
| 20 | 3.4E+07 | 3.4E+07 | KD2-H4K8la_peak_4057 | 8.10373  | NFS1_ENSG00000244005;ROMO1_ENSG00000125995                                       |
| 20 | 3.5E+07 | 3.5E+07 | KD2-H4K8la_peak_4058 | 6.75222  |                                                                                  |
| 20 | 3.5E+07 | 3.5E+07 | KD2-H4K8la_peak_4059 | 6.03964  |                                                                                  |
| 20 | 3.5E+07 | 3.5E+07 | KD2-H4K8la_peak_4060 | 9.27415  |                                                                                  |
| 20 | 3.5E+07 | 3.5E+07 | KD2-H4K8la_peak_4061 | 6.28277  |                                                                                  |
| 20 | 3.5E+07 | 3.5E+07 | KD2-H4K8la_peak_4062 | 6.64804  | RP5-977B1.7_ENSG00000232907;TGIF2_ENSG00000118707                                |
| 20 | 3.5E+07 | 3.5E+07 | KD2-H4K8la_peak_4063 | 6.20477  | RP5-977B1.7_ENSG00000232907;TGIF2_ENSG00000118707;TGIF2-C20orf24_ENSG00000259399 |
| 20 | 3.5E+07 | 3.5E+07 | KD2-H4K8la_peak_4064 | 8.37064  |                                                                                  |
| 20 | 3.5E+07 | 3.5E+07 | KD2-H4K8la_peak_4065 | 5.3107   | SOGA1_ENSG00000149639                                                            |
| 20 | 3.6E+07 | 3.6E+07 | KD2-H4K8la_peak_4066 | 10.90862 | SAMHD1_ENSG00000101347                                                           |
| 20 | 3.6E+07 | 3.6E+07 | KD2-H4K8la_peak_4067 | 6.5403   |                                                                                  |
| 20 | 3.6E+07 | 3.6E+07 | KD2-H4K8la_peak_4068 | 7.81267  |                                                                                  |
| 20 | 3.6E+07 | 3.6E+07 | KD2-H4K8la_peak_4069 | 8.50453  |                                                                                  |
| 20 | 3.6E+07 | 3.6E+07 | KD2-H4K8la_peak_4070 | 11.52197 |                                                                                  |
| 20 | 3.6E+07 | 3.6E+07 | KD2-H4K8la_peak_4071 | 6.13507  |                                                                                  |
| 20 | 3.6E+07 | 3.6E+07 | KD2-H4K8la_peak_4072 | 5.83285  |                                                                                  |
| 20 | 3.6E+07 | 3.6E+07 | KD2-H4K8la_peak_4073 | 9.52279  |                                                                                  |
| 20 | 3.6E+07 | 3.6E+07 | KD2-H4K8la_peak_4074 | 8.49617  |                                                                                  |
| 20 | 3.6E+07 | 3.6E+07 | KD2-H4K8la_peak_4075 | 6.77116  |                                                                                  |
| 20 | 3.6E+07 | 3.6E+07 | KD2-H4K8la_peak_4076 | 9.27415  |                                                                                  |
| 20 | 3.6E+07 | 3.6E+07 | KD2-H4K8la_peak_4077 | 9.61894  |                                                                                  |
| 20 | 3.6E+07 | 3.6E+07 | KD2-H4K8la_peak_4078 | 6.3399   |                                                                                  |
| 20 | 3.6E+07 | 3.6E+07 | KD2-H4K8la_peak_4079 | 8.12466  |                                                                                  |
| 20 | 3.6E+07 | 3.6E+07 | KD2-H4K8la_peak_4080 | 5.05367  |                                                                                  |
| 20 | 3.6E+07 | 3.6E+07 | KD2-H4K8la_peak_4081 | 11.15747 |                                                                                  |
| 20 | 3.6E+07 | 3.6E+07 | KD2-H4K8la_peak_4082 | 13.08108 |                                                                                  |
| 20 | 3.6E+07 | 3.6E+07 | KD2-H4K8la_peak_4083 | 5.99671  |                                                                                  |
| 20 | 3.6E+07 | 3.6E+07 | KD2-H4K8la_peak_4084 | 11.50321 | BLCAP_ENSG00000166619                                                            |
| 20 | 3.7E+07 | 3.7E+07 | KD2-H4K8la_peak_4085 | 11.40266 | VSTM2L_ENSG00000132821                                                           |
| 20 | 3.7E+07 | 3.7E+07 | KD2-H4K8la_peak_4086 | 9.67335  | SNHG17_ENSG00000196756;SNORA71D_ENSG00000200354                                  |
| 20 | 3.7E+07 | 3.7E+07 | KD2-H4K8la_peak_4087 | 9.20163  | SNHG11_ENSG00000174365                                                           |
| 20 | 3.8E+07 | 3.8E+07 | KD2-H4K8la_peak_4088 | 8.79494  | RN7SL116P_ENSG00000240474                                                        |
| 20 | 3.8E+07 | 3.8E+07 | KD2-H4K8la_peak_4089 | 6.77116  |                                                                                  |
| 20 | 3.8E+07 | 3.8E+07 | KD2-H4K8la_peak_4090 | 6.36118  |                                                                                  |
| 20 | 3.8E+07 | 3.8E+07 | KD2-H4K8la_peak_4091 | 5.36015  |                                                                                  |
| 20 | 3.9E+07 | 3.9E+07 | KD2-H4K8la_peak_4092 | 5.67034  | MAFB_ENSG00000204103                                                             |

|    |         |         |                      |          |                                                      |
|----|---------|---------|----------------------|----------|------------------------------------------------------|
| 20 | 4E+07   | 4E+07   | KD2-H4K8la_peak_4093 | 8.76116  | RP1-1J6.2_ENSG00000226648;PLCG1_ENSG00000124181      |
| 20 | 4E+07   | 4E+07   | KD2-H4K8la_peak_4094 | 6.77116  | RP1-1J6.2_ENSG00000226648;PLCG1_ENSG00000124181      |
| 20 | 4E+07   | 4E+07   | KD2-H4K8la_peak_4095 | 9.73848  | CHD6_ENSG00000124177                                 |
| 20 | 4.2E+07 | 4.2E+07 | KD2-H4K8la_peak_4096 | 7.447    |                                                      |
| 20 | 4.3E+07 | 4.3E+07 | KD2-H4K8la_peak_4097 | 9.20163  | TOX2_ENSG00000124191                                 |
| 20 | 4.3E+07 | 4.3E+07 | KD2-H4K8la_peak_4098 | 6.64804  |                                                      |
| 20 | 4.3E+07 | 4.3E+07 | KD2-H4K8la_peak_4099 | 8.98765  |                                                      |
| 20 | 4.3E+07 | 4.3E+07 | KD2-H4K8la_peak_4100 | 11.15747 |                                                      |
| 20 | 4.3E+07 | 4.3E+07 | KD2-H4K8la_peak_4101 | 11.69149 |                                                      |
| 20 | 4.3E+07 | 4.3E+07 | KD2-H4K8la_peak_4102 | 10.58561 |                                                      |
| 20 | 4.3E+07 | 4.3E+07 | KD2-H4K8la_peak_4103 | 6.20793  |                                                      |
| 20 | 4.3E+07 | 4.3E+07 | KD2-H4K8la_peak_4104 | 5.05146  | RP11-445H22.4_ENSG00000244558;KCNK15_ENSG00000124249 |
| 20 | 4.4E+07 | 4.4E+07 | KD2-H4K8la_peak_4105 | 7.47988  |                                                      |
| 20 | 4.4E+07 | 4.4E+07 | KD2-H4K8la_peak_4106 | 7.9397   | SDC4_ENSG00000124145                                 |
| 20 | 4.4E+07 | 4.4E+07 | KD2-H4K8la_peak_4107 | 8.12466  | PIGT_ENSG00000124155                                 |
| 20 | 4.4E+07 | 4.4E+07 | KD2-H4K8la_peak_4108 | 6.2278   |                                                      |
| 20 | 4.4E+07 | 4.4E+07 | KD2-H4K8la_peak_4109 | 8.77936  | WFDC3_ENSG00000124116;DNTP1P1_ENSG00000101457        |
| 20 | 4.5E+07 | 4.5E+07 | KD2-H4K8la_peak_4110 | 5.7631   | ZSWIM1_ENSG00000168612                               |
| 20 | 4.5E+07 | 4.5E+07 | KD2-H4K8la_peak_4111 | 6.47589  | NEURL2_ENSG00000124257;CTSA_ENSG00000064601          |
| 20 | 4.5E+07 | 4.5E+07 | KD2-H4K8la_peak_4112 | 14.09647 | PCIF1_ENSG00000100982                                |
| 20 | 4.5E+07 | 4.5E+07 | KD2-H4K8la_peak_4113 | 7.61975  | ZNF335_ENSG00000198026                               |
| 20 | 4.5E+07 | 4.5E+07 | KD2-H4K8la_peak_4114 | 7.38202  | ZNF335_ENSG00000198026                               |
| 20 | 4.5E+07 | 4.5E+07 | KD2-H4K8la_peak_4115 | 5.33512  |                                                      |
| 20 | 4.5E+07 | 4.5E+07 | KD2-H4K8la_peak_4116 | 17.33071 | SLC35C2_ENSG00000080189                              |
| 20 | 4.5E+07 | 4.5E+07 | KD2-H4K8la_peak_4117 | 6.97699  | ZNF334_ENSG00000198185                               |
| 20 | 4.5E+07 | 4.5E+07 | KD2-H4K8la_peak_4118 | 8.39919  | SLC2A10_ENSG00000197496                              |
| 20 | 4.6E+07 | 4.6E+07 | KD2-H4K8la_peak_4119 | 8.17106  |                                                      |
| 20 | 4.6E+07 | 4.6E+07 | KD2-H4K8la_peak_4120 | 5.7631   |                                                      |
| 20 | 4.6E+07 | 4.6E+07 | KD2-H4K8la_peak_4121 | 17.30105 | ZMYND8_ENSG00000101040                               |
| 20 | 4.6E+07 | 4.6E+07 | KD2-H4K8la_peak_4122 | 6.13507  | ZMYND8_ENSG00000101040                               |
| 20 | 4.6E+07 | 4.6E+07 | KD2-H4K8la_peak_4123 | 6.10429  | RNU6-563P_ENSG00000201742                            |
| 20 | 4.8E+07 | 4.8E+07 | KD2-H4K8la_peak_4124 | 6.11881  | ARFGEF2_ENSG00000124198                              |
| 20 | 4.8E+07 | 4.8E+07 | KD2-H4K8la_peak_4125 | 9.49266  | STAU1_ENSG00000124214                                |
| 20 | 4.8E+07 | 4.8E+07 | KD2-H4K8la_peak_4126 | 5.05146  | DDX27_ENSG00000124228                                |
| 20 | 4.8E+07 | 4.8E+07 | KD2-H4K8la_peak_4127 | 6.57319  | B4GALT5_ENSG00000158470                              |
| 20 | 4.8E+07 | 4.8E+07 | KD2-H4K8la_peak_4128 | 15.01131 | SLC9A8_ENSG00000197818                               |
| 20 | 4.9E+07 | 4.9E+07 | KD2-H4K8la_peak_4129 | 10.28981 |                                                      |
| 20 | 4.9E+07 | 4.9E+07 | KD2-H4K8la_peak_4130 | 10.84057 |                                                      |
| 20 | 4.9E+07 | 4.9E+07 | KD2-H4K8la_peak_4131 | 8.39919  |                                                      |
| 20 | 4.9E+07 | 4.9E+07 | KD2-H4K8la_peak_4132 | 8.93385  |                                                      |
| 20 | 4.9E+07 | 4.9E+07 | KD2-H4K8la_peak_4133 | 10.20357 |                                                      |
| 20 | 4.9E+07 | 4.9E+07 | KD2-H4K8la_peak_4134 | 6.2278   |                                                      |
| 20 | 4.9E+07 | 4.9E+07 | KD2-H4K8la_peak_4135 | 5.0762   | BCAS4_ENSG00000124243                                |
| 20 | 5E+07   | 5E+07   | KD2-H4K8la_peak_4136 | 11.5908  | ADNP_ENSG00000101126;RP5-914P20.5_ENSG00000259456    |
| 20 | 5E+07   | 5E+07   | KD2-H4K8la_peak_4137 | 9.90319  |                                                      |
| 20 | 5.1E+07 | 5.1E+07 | KD2-H4K8la_peak_4138 | 8.66164  |                                                      |

|    |         |         |                      |          |                                                   |
|----|---------|---------|----------------------|----------|---------------------------------------------------|
| 20 | 5.6E+07 | 5.6E+07 | KD2-H4K8la_peak_4139 | 9.0413   |                                                   |
| 20 | 5.6E+07 | 5.6E+07 | KD2-H4K8la_peak_4140 | 5.36015  |                                                   |
| 20 | 5.6E+07 | 5.6E+07 | KD2-H4K8la_peak_4141 | 6.96161  | BMP7_ENSG00000101144;RP4-813D12.3_ENSG00000226308 |
| 20 | 5.6E+07 | 5.6E+07 | KD2-H4K8la_peak_4142 | 11.97807 | RAE1_ENSG00000101146                              |
| 20 | 5.6E+07 | 5.6E+07 | KD2-H4K8la_peak_4143 | 8.12466  |                                                   |
| 20 | 5.7E+07 | 5.7E+07 | KD2-H4K8la_peak_4144 | 7.78147  |                                                   |
| 20 | 5.7E+07 | 5.7E+07 | KD2-H4K8la_peak_4145 | 10.91315 |                                                   |
| 20 | 5.7E+07 | 5.7E+07 | KD2-H4K8la_peak_4146 | 5.28047  | ANKRD60_ENSG00000124227                           |
| 20 | 5.7E+07 | 5.7E+07 | KD2-H4K8la_peak_4147 | 7.51302  | PPP4R1L_ENSG00000124224;RAB22A_ENSG00000124209    |
| 20 | 5.7E+07 | 5.7E+07 | KD2-H4K8la_peak_4148 | 9.27415  | PPP4R1L_ENSG00000124224;RAB22A_ENSG00000124209    |
| 20 | 5.7E+07 | 5.7E+07 | KD2-H4K8la_peak_4149 | 8.37064  | RP1-309F20.4_ENSG00000270951                      |
| 20 | 5.8E+07 | 5.8E+07 | KD2-H4K8la_peak_4150 | 9.66714  | SLMO2_ENSG00000101166                             |
| 20 | 5.8E+07 | 5.8E+07 | KD2-H4K8la_peak_4151 | 8.00569  |                                                   |
| 20 | 5.8E+07 | 5.8E+07 | KD2-H4K8la_peak_4152 | 9.11321  |                                                   |
| 20 | 5.8E+07 | 5.8E+07 | KD2-H4K8la_peak_4153 | 11.06859 |                                                   |
| 20 | 5.8E+07 | 5.8E+07 | KD2-H4K8la_peak_4154 | 4.86896  |                                                   |
| 20 | 5.8E+07 | 5.8E+07 | KD2-H4K8la_peak_4155 | 4.53273  |                                                   |
| 20 | 5.9E+07 | 5.9E+07 | KD2-H4K8la_peak_4156 | 8.13727  | SYCP2_ENSG00000196074;FAM217B_ENSG00000196227     |
| 20 | 6.1E+07 | 6.1E+07 | KD2-H4K8la_peak_4157 | 5.3107   |                                                   |
| 20 | 6.1E+07 | 6.1E+07 | KD2-H4K8la_peak_4158 | 7.3993   |                                                   |
| 20 | 6.1E+07 | 6.1E+07 | KD2-H4K8la_peak_4159 | 7.91061  |                                                   |
| 20 | 6.1E+07 | 6.1E+07 | KD2-H4K8la_peak_4160 | 8.00843  | LAMA5_ENSG00000130702                             |
| 20 | 6.1E+07 | 6.1E+07 | KD2-H4K8la_peak_4161 | 6.3399   | LAMA5_ENSG00000130702                             |
| 20 | 6.1E+07 | 6.1E+07 | KD2-H4K8la_peak_4162 | 7.12014  | RPS21_ENSG00000171858                             |
| 20 | 6.1E+07 | 6.1E+07 | KD2-H4K8la_peak_4163 | 5.98775  |                                                   |
| 20 | 6.1E+07 | 6.1E+07 | KD2-H4K8la_peak_4164 | 5.83285  | RP13-30A9.1_ENSG00000232121                       |
| 20 | 6.1E+07 | 6.1E+07 | KD2-H4K8la_peak_4165 | 9.10568  |                                                   |
| 20 | 6.1E+07 | 6.1E+07 | KD2-H4K8la_peak_4166 | 8.16787  |                                                   |
| 20 | 6.1E+07 | 6.1E+07 | KD2-H4K8la_peak_4167 | 7.12014  |                                                   |
| 20 | 6.1E+07 | 6.1E+07 | KD2-H4K8la_peak_4168 | 10.89081 |                                                   |
| 20 | 6.1E+07 | 6.1E+07 | KD2-H4K8la_peak_4169 | 6.2278   |                                                   |
| 20 | 6.1E+07 | 6.1E+07 | KD2-H4K8la_peak_4170 | 8.00701  | MRGBP_ENSG00000101189                             |
| 20 | 6.1E+07 | 6.1E+07 | KD2-H4K8la_peak_4171 | 7.12014  |                                                   |
| 20 | 6.1E+07 | 6.1E+07 | KD2-H4K8la_peak_4172 | 5.79108  |                                                   |
| 20 | 6.1E+07 | 6.1E+07 | KD2-H4K8la_peak_4173 | 6.86458  |                                                   |
| 20 | 6.1E+07 | 6.1E+07 | KD2-H4K8la_peak_4174 | 8.76116  |                                                   |
| 20 | 6.2E+07 | 6.2E+07 | KD2-H4K8la_peak_4175 | 5.52913  |                                                   |
| 20 | 6.2E+07 | 6.2E+07 | KD2-H4K8la_peak_4176 | 7.12308  | YTHDF1_ENSG00000149658                            |
| 20 | 6.2E+07 | 6.2E+07 | KD2-H4K8la_peak_4177 | 9.0516   |                                                   |
| 20 | 6.2E+07 | 6.2E+07 | KD2-H4K8la_peak_4178 | 7.92775  |                                                   |
| 20 | 6.2E+07 | 6.2E+07 | KD2-H4K8la_peak_4179 | 11.20123 |                                                   |
| 20 | 6.2E+07 | 6.2E+07 | KD2-H4K8la_peak_4180 | 13.47058 |                                                   |
| 20 | 6.2E+07 | 6.2E+07 | KD2-H4K8la_peak_4181 | 14.3505  |                                                   |
| 20 | 6.2E+07 | 6.2E+07 | KD2-H4K8la_peak_4182 | 11.81269 |                                                   |
| 20 | 6.2E+07 | 6.2E+07 | KD2-H4K8la_peak_4183 | 8.84474  |                                                   |
| 20 | 6.2E+07 | 6.2E+07 | KD2-H4K8la_peak_4184 | 4.66473  |                                                   |

|    |         |         |                      |          |                                                                                                |
|----|---------|---------|----------------------|----------|------------------------------------------------------------------------------------------------|
| 20 | 6.2E+07 | 6.2E+07 | KD2-H4K8la_peak_4185 | 8.46409  | EEF1A2_ENSG00000101210                                                                         |
| 20 | 6.2E+07 | 6.2E+07 | KD2-H4K8la_peak_4186 | 6.98292  | EEF1A2_ENSG00000101210                                                                         |
| 20 | 6.2E+07 | 6.2E+07 | KD2-H4K8la_peak_4187 | 7.3993   | RP4-697K14.3_ENSG00000230226                                                                   |
| 20 | 6.2E+07 | 6.2E+07 | KD2-H4K8la_peak_4188 | 6.04152  | PTK6_ENSG00000101213                                                                           |
| 20 | 6.2E+07 | 6.2E+07 | KD2-H4K8la_peak_4189 | 17.44434 | GMEB2_ENSG00000101216;CTD-3184A7.4_ENSG00000232442                                             |
| 20 | 6.2E+07 | 6.2E+07 | KD2-H4K8la_peak_4190 | 5.33301  | RTEL1_ENSG00000258366                                                                          |
| 20 | 6.2E+07 | 6.2E+07 | KD2-H4K8la_peak_4191 | 7.06427  | ARFRP1_ENSG00000101246;ZGPAT_ENSG00000197114                                                   |
| 20 | 6.2E+07 | 6.2E+07 | KD2-H4K8la_peak_4192 | 9.6708   | ARFRP1_ENSG00000101246;ZGPAT_ENSG00000197114;RP4-583P15.15_ENSG00000273154                     |
| 20 | 6.2E+07 | 6.2E+07 | KD2-H4K8la_peak_4193 | 7.49467  |                                                                                                |
| 20 | 6.3E+07 | 6.3E+07 | KD2-H4K8la_peak_4194 | 8.50453  |                                                                                                |
| 20 | 6.3E+07 | 6.3E+07 | KD2-H4K8la_peak_4195 | 8.07102  | SAMD10_ENSG00000130590;PRPF6_ENSG00000101161                                                   |
| 21 | 1.1E+07 | 1.1E+07 | KD2-H4K8la_peak_4196 | 5.79108  |                                                                                                |
| 21 | 1.6E+07 | 1.6E+07 | KD2-H4K8la_peak_4197 | 8.12466  | HSPA13_ENSG00000155304                                                                         |
| 21 | 1.9E+07 | 1.9E+07 | KD2-H4K8la_peak_4198 | 8.37064  | BTG3_ENSG00000154640                                                                           |
| 21 | 1.9E+07 | 1.9E+07 | KD2-H4K8la_peak_4199 | 10.58561 | C21orf91_ENSG00000154642                                                                       |
| 21 | 2.7E+07 | 2.7E+07 | KD2-H4K8la_peak_4200 | 9.86881  | ATP5J_ENSG00000154723;GABPA_ENSG00000154727                                                    |
| 21 | 2.8E+07 | 2.8E+07 | KD2-H4K8la_peak_4201 | 5.83285  | ADAMTS1_ENSG00000154734                                                                        |
| 21 | 3E+07   | 3E+07   | KD2-H4K8la_peak_4202 | 7.81267  | RP1-100J12.1_ENSG00000273254;USP16_ENSG00000156256                                             |
| 21 | 3.3E+07 | 3.3E+07 | KD2-H4K8la_peak_4203 | 5.83285  |                                                                                                |
| 21 | 3.3E+07 | 3.3E+07 | KD2-H4K8la_peak_4204 | 5.10388  | AP000253.1_ENSG00000234509;SOD1_ENSG00000142168                                                |
| 21 | 3.3E+07 | 3.3E+07 | KD2-H4K8la_peak_4205 | 6.64804  | HUNK_ENSG00000142149                                                                           |
| 21 | 3.4E+07 | 3.4E+07 | KD2-H4K8la_peak_4206 | 10.97039 | URB1_ENSG00000142207;C21orf119_ENSG00000256073                                                 |
| 21 | 3.4E+07 | 3.4E+07 | KD2-H4K8la_peak_4207 | 10.04111 | PAXBPI_ENSG00000159086;C21orf49_ENSG00000205930                                                |
| 21 | 3.5E+07 | 3.5E+07 | KD2-H4K8la_peak_4208 | 5.84385  | IFNAR1_ENSG00000142166                                                                         |
| 21 | 3.5E+07 | 3.5E+07 | KD2-H4K8la_peak_4209 | 10.2573  | DNAJC28_ENSG00000177692                                                                        |
| 21 | 3.5E+07 | 3.5E+07 | KD2-H4K8la_peak_4210 | 11.06859 | MRPS6_ENSG00000243927;SLC5A3_ENSG00000272962;SLC5A3_ENSG00000198743;AP000320.7_ENSG00000272657 |
| 21 | 3.6E+07 | 3.6E+07 | KD2-H4K8la_peak_4211 | 9.86881  | AP000318.2_ENSG00000214955                                                                     |
| 21 | 3.8E+07 | 3.8E+07 | KD2-H4K8la_peak_4212 | 11.36807 | MORC3_ENSG00000159256                                                                          |
| 21 | 3.8E+07 | 3.8E+07 | KD2-H4K8la_peak_4213 | 5.23773  | HLCS_ENSG00000159267                                                                           |
| 21 | 3.8E+07 | 3.8E+07 | KD2-H4K8la_peak_4214 | 10.16316 | PIGP_ENSG00000185808;TTC3_ENSG00000182670                                                      |
| 21 | 4.1E+07 | 4.1E+07 | KD2-H4K8la_peak_4215 | 5.67034  | BRWD1-IT2_ENSG00000255568                                                                      |
| 21 | 4.1E+07 | 4.1E+07 | KD2-H4K8la_peak_4216 | 12.1221  | HMG11_ENSG00000205581                                                                          |
| 21 | 4.1E+07 | 4.1E+07 | KD2-H4K8la_peak_4217 | 4.6555   | HMG11_ENSG00000205581                                                                          |
| 21 | 4.1E+07 | 4.1E+07 | KD2-H4K8la_peak_4218 | 6.3399   |                                                                                                |
| 21 | 4.3E+07 | 4.3E+07 | KD2-H4K8la_peak_4219 | 7.13237  | PRDM15_ENSG00000141956                                                                         |
| 21 | 4.3E+07 | 4.3E+07 | KD2-H4K8la_peak_4220 | 7.60756  |                                                                                                |
| 21 | 4.4E+07 | 4.4E+07 | KD2-H4K8la_peak_4221 | 5.67034  |                                                                                                |
| 21 | 4.4E+07 | 4.4E+07 | KD2-H4K8la_peak_4222 | 4.75945  |                                                                                                |
| 21 | 4.4E+07 | 4.4E+07 | KD2-H4K8la_peak_4223 | 6.86458  | PDE9A_ENSG00000160191                                                                          |
| 21 | 4.4E+07 | 4.4E+07 | KD2-H4K8la_peak_4224 | 7.72421  |                                                                                                |
| 21 | 4.4E+07 | 4.4E+07 | KD2-H4K8la_peak_4225 | 11.06859 | WDR4_ENSG00000160193;NDUFV3_ENSG00000160194                                                    |
| 21 | 4.4E+07 | 4.4E+07 | KD2-H4K8la_peak_4226 | 8.2051   |                                                                                                |
| 21 | 4.4E+07 | 4.4E+07 | KD2-H4K8la_peak_4227 | 6.13507  | PKNOX1_ENSG00000160199                                                                         |
| 21 | 4.5E+07 | 4.5E+07 | KD2-H4K8la_peak_4228 | 6.36044  |                                                                                                |
| 21 | 4.5E+07 | 4.5E+07 | KD2-H4K8la_peak_4229 | 14.5688  |                                                                                                |
| 21 | 4.5E+07 | 4.5E+07 | KD2-H4K8la_peak_4230 | 12.13455 | PDXK_ENSG00000160209                                                                           |

|    |         |         |                      |          |                                                    |
|----|---------|---------|----------------------|----------|----------------------------------------------------|
| 21 | 4.5E+07 | 4.5E+07 | KD2-H4K8la_peak_4231 | 12.61456 |                                                    |
| 21 | 4.5E+07 | 4.5E+07 | KD2-H4K8la_peak_4232 | 13.63983 | AGPAT3_ENSG00000160216                             |
| 21 | 4.5E+07 | 4.5E+07 | KD2-H4K8la_peak_4233 | 8.00569  | TRAPPC10_ENSG00000160218                           |
| 21 | 4.6E+07 | 4.6E+07 | KD2-H4K8la_peak_4234 | 4.7338   | AP001058.3_ENSG00000232698                         |
| 21 | 4.6E+07 | 4.6E+07 | KD2-H4K8la_peak_4235 | 6.92098  | PFKL_ENSG00000141959                               |
| 21 | 4.6E+07 | 4.6E+07 | KD2-H4K8la_peak_4236 | 8.12466  | C21orf67_ENSG00000183250;FAM207A_ENSG00000160256   |
| 21 | 4.6E+07 | 4.6E+07 | KD2-H4K8la_peak_4237 | 5.50657  |                                                    |
| 21 | 4.6E+07 | 4.6E+07 | KD2-H4K8la_peak_4238 | 8.00569  |                                                    |
| 21 | 4.6E+07 | 4.6E+07 | KD2-H4K8la_peak_4239 | 7.19298  |                                                    |
| 21 | 4.7E+07 | 4.7E+07 | KD2-H4K8la_peak_4240 | 7.54643  | POFUT2_ENSG00000186866;BX322557.10_ENSG00000215447 |
| 21 | 4.7E+07 | 4.7E+07 | KD2-H4K8la_peak_4241 | 7.12497  |                                                    |
| 21 | 4.7E+07 | 4.7E+07 | KD2-H4K8la_peak_4242 | 7.31013  |                                                    |
| 21 | 4.7E+07 | 4.7E+07 | KD2-H4K8la_peak_4243 | 7.12014  |                                                    |
| 21 | 4.7E+07 | 4.7E+07 | KD2-H4K8la_peak_4244 | 8.16787  |                                                    |
| 21 | 4.7E+07 | 4.7E+07 | KD2-H4K8la_peak_4245 | 8.80046  |                                                    |
| 21 | 4.7E+07 | 4.7E+07 | KD2-H4K8la_peak_4246 | 17.3629  |                                                    |
| 21 | 4.7E+07 | 4.7E+07 | KD2-H4K8la_peak_4247 | 9.66714  |                                                    |
| 21 | 4.7E+07 | 4.7E+07 | KD2-H4K8la_peak_4248 | 6.96161  |                                                    |
| 21 | 4.8E+07 | 4.8E+07 | KD2-H4K8la_peak_4249 | 8.76082  | PRMT2_ENSG00000160310                              |
| 22 | 1.8E+07 | 1.8E+07 | KD2-H4K8la_peak_4250 | 5.83285  | CECR5-AS1_ENSG00000185837                          |
| 22 | 1.8E+07 | 1.8E+07 | KD2-H4K8la_peak_4251 | 10.03312 |                                                    |
| 22 | 1.8E+07 | 1.8E+07 | KD2-H4K8la_peak_4252 | 7.45264  |                                                    |
| 22 | 1.8E+07 | 1.8E+07 | KD2-H4K8la_peak_4253 | 7.12014  |                                                    |
| 22 | 1.9E+07 | 1.9E+07 | KD2-H4K8la_peak_4254 | 7.49467  | DGCR5_ENSG00000237517                              |
| 22 | 1.9E+07 | 1.9E+07 | KD2-H4K8la_peak_4255 | 17.91109 | AC004463.6_ENSG00000260924                         |
| 22 | 1.9E+07 | 1.9E+07 | KD2-H4K8la_peak_4256 | 5.95337  | CLTCL1_ENSG00000070371                             |
| 22 | 2E+07   | 2E+07   | KD2-H4K8la_peak_4257 | 5.8369   |                                                    |
| 22 | 2E+07   | 2E+07   | KD2-H4K8la_peak_4258 | 5.97961  | GNB1L_ENSG00000185838;C22orf29_ENSG00000215012     |
| 22 | 2E+07   | 2E+07   | KD2-H4K8la_peak_4259 | 14.15376 | DGCR8_ENSG00000128191                              |
| 22 | 2E+07   | 2E+07   | KD2-H4K8la_peak_4260 | 10.74378 |                                                    |
| 22 | 2E+07   | 2E+07   | KD2-H4K8la_peak_4261 | 9.70191  |                                                    |
| 22 | 2E+07   | 2E+07   | KD2-H4K8la_peak_4262 | 5.9366   |                                                    |
| 22 | 2.1E+07 | 2.1E+07 | KD2-H4K8la_peak_4263 | 6.96161  | ZNF74_ENSG00000185252                              |
| 22 | 2.1E+07 | 2.1E+07 | KD2-H4K8la_peak_4264 | 5.33301  |                                                    |
| 22 | 2.1E+07 | 2.1E+07 | KD2-H4K8la_peak_4265 | 5.58883  | AC002472.13_ENSG00000187905                        |
| 22 | 2.2E+07 | 2.2E+07 | KD2-H4K8la_peak_4266 | 10.36292 |                                                    |
| 22 | 2.2E+07 | 2.2E+07 | KD2-H4K8la_peak_4267 | 10.90862 |                                                    |
| 22 | 2.2E+07 | 2.2E+07 | KD2-H4K8la_peak_4268 | 7.72421  |                                                    |
| 22 | 2.3E+07 | 2.3E+07 | KD2-H4K8la_peak_4269 | 8.37064  |                                                    |
| 22 | 2.3E+07 | 2.3E+07 | KD2-H4K8la_peak_4270 | 8.12047  |                                                    |
| 22 | 2.4E+07 | 2.4E+07 | KD2-H4K8la_peak_4271 | 12.12824 | ZDHHHC8P1_ENSG00000133519                          |
| 22 | 2.4E+07 | 2.4E+07 | KD2-H4K8la_peak_4272 | 5.3107   |                                                    |
| 22 | 2.4E+07 | 2.4E+07 | KD2-H4K8la_peak_4273 | 6.97699  |                                                    |
| 22 | 2.4E+07 | 2.4E+07 | KD2-H4K8la_peak_4274 | 16.37338 |                                                    |
| 22 | 2.4E+07 | 2.4E+07 | KD2-H4K8la_peak_4275 | 19.16587 |                                                    |
| 22 | 2.4E+07 | 2.4E+07 | KD2-H4K8la_peak_4276 | 5.83285  |                                                    |

|    |         |         |                      |          |                                                                                |
|----|---------|---------|----------------------|----------|--------------------------------------------------------------------------------|
| 22 | 2.4E+07 | 2.4E+07 | KD2-H4K8la_peak_4277 | 8.37064  |                                                                                |
| 22 | 2.4E+07 | 2.4E+07 | KD2-H4K8la_peak_4278 | 9.20163  | GUSBP11_ENSG00000228315;KB-1572G7.2_ENSG00000273000;AP000347.2_ENSG00000272578 |
| 22 | 2.4E+07 | 2.4E+07 | KD2-H4K8la_peak_4279 | 5.33301  | SMARCB1_ENSG00000099956                                                        |
| 22 | 2.4E+07 | 2.4E+07 | KD2-H4K8la_peak_4280 | 7.41831  |                                                                                |
| 22 | 2.4E+07 | 2.4E+07 | KD2-H4K8la_peak_4281 | 8.39919  | MIF_ENSG00000240972                                                            |
| 22 | 2.4E+07 | 2.4E+07 | KD2-H4K8la_peak_4282 | 6.75548  | MIF_ENSG00000240972                                                            |
| 22 | 2.4E+07 | 2.4E+07 | KD2-H4K8la_peak_4283 | 10.99007 |                                                                                |
| 22 | 2.5E+07 | 2.5E+07 | KD2-H4K8la_peak_4284 | 10.66289 | GGT5_ENSG00000099998                                                           |
| 22 | 2.5E+07 | 2.5E+07 | KD2-H4K8la_peak_4285 | 4.30663  |                                                                                |
| 22 | 2.5E+07 | 2.5E+07 | KD2-H4K8la_peak_4286 | 6.36118  |                                                                                |
| 22 | 2.5E+07 | 2.5E+07 | KD2-H4K8la_peak_4287 | 8.98765  |                                                                                |
| 22 | 2.5E+07 | 2.5E+07 | KD2-H4K8la_peak_4288 | 6.3399   |                                                                                |
| 22 | 2.5E+07 | 2.5E+07 | KD2-H4K8la_peak_4289 | 7.92775  |                                                                                |
| 22 | 2.5E+07 | 2.5E+07 | KD2-H4K8la_peak_4290 | 10.02595 |                                                                                |
| 22 | 2.5E+07 | 2.5E+07 | KD2-H4K8la_peak_4291 | 5.05146  |                                                                                |
| 22 | 2.5E+07 | 2.5E+07 | KD2-H4K8la_peak_4292 | 6.13507  |                                                                                |
| 22 | 2.6E+07 | 2.6E+07 | KD2-H4K8la_peak_4293 | 9.20163  |                                                                                |
| 22 | 2.7E+07 | 2.7E+07 | KD2-H4K8la_peak_4294 | 8.37064  | HPS4_ENSG00000100099;SRRD_ENSG00000100104                                      |
| 22 | 2.7E+07 | 2.7E+07 | KD2-H4K8la_peak_4295 | 6.75892  | CRYBB1_ENSG00000100122                                                         |
| 22 | 2.7E+07 | 2.7E+07 | KD2-H4K8la_peak_4296 | 10.16645 |                                                                                |
| 22 | 2.7E+07 | 2.7E+07 | KD2-H4K8la_peak_4297 | 4.90979  |                                                                                |
| 22 | 2.7E+07 | 2.7E+07 | KD2-H4K8la_peak_4298 | 12.62032 | CTA-373H7.7_ENSG00000206028;CTA-211A9.5_ENSG00000244625                        |
| 22 | 2.8E+07 | 2.8E+07 | KD2-H4K8la_peak_4299 | 11.11083 |                                                                                |
| 22 | 3E+07   | 3E+07   | KD2-H4K8la_peak_4300 | 5.58883  | RHBDD3_ENSG00000100263;EWSR1_ENSG00000182944                                   |
| 22 | 3E+07   | 3E+07   | KD2-H4K8la_peak_4301 | 7.33892  | NEFH_ENSG00000100285                                                           |
| 22 | 3E+07   | 3E+07   | KD2-H4K8la_peak_4302 | 4.69635  | NIPSNAP1_ENSG00000184117                                                       |
| 22 | 3E+07   | 3E+07   | KD2-H4K8la_peak_4303 | 9.0413   |                                                                                |
| 22 | 3E+07   | 3E+07   | KD2-H4K8la_peak_4304 | 4.30663  | ZMAT5_ENSG00000100319;UQCR10_ENSG00000184076                                   |
| 22 | 3E+07   | 3E+07   | KD2-H4K8la_peak_4305 | 8.74872  | ZMAT5_ENSG00000100319;UQCR10_ENSG00000184076                                   |
| 22 | 3E+07   | 3E+07   | KD2-H4K8la_peak_4306 | 8.84474  | ASCC2_ENSG00000100325                                                          |
| 22 | 3.1E+07 | 3.1E+07 | KD2-H4K8la_peak_4307 | 6.13507  |                                                                                |
| 22 | 3.1E+07 | 3.1E+07 | KD2-H4K8la_peak_4308 | 15.74238 | MORC2_ENSG00000133422                                                          |
| 22 | 3.1E+07 | 3.1E+07 | KD2-H4K8la_peak_4309 | 9.73848  | TUG1_ENSG00000253352                                                           |
| 22 | 3.1E+07 | 3.1E+07 | KD2-H4K8la_peak_4310 | 9.27415  |                                                                                |
| 22 | 3.2E+07 | 3.2E+07 | KD2-H4K8la_peak_4311 | 8.43222  | MIR3928_ENSG00000264141;RNF185_ENSG00000138942                                 |
| 22 | 3.2E+07 | 3.2E+07 | KD2-H4K8la_peak_4312 | 7.3993   | PATZ1_ENSG00000100105;AC005003.1_ENSG00000213888                               |
| 22 | 3.2E+07 | 3.2E+07 | KD2-H4K8la_peak_4313 | 5.89088  |                                                                                |
| 22 | 3.2E+07 | 3.2E+07 | KD2-H4K8la_peak_4314 | 4.69635  |                                                                                |
| 22 | 3.2E+07 | 3.2E+07 | KD2-H4K8la_peak_4315 | 8.07102  | YWHAH_ENSG00000128245                                                          |
| 22 | 3.2E+07 | 3.2E+07 | KD2-H4K8la_peak_4316 | 7.13237  | YWHAH_ENSG00000128245;C22orf24_ENSG00000128254                                 |
| 22 | 3.3E+07 | 3.3E+07 | KD2-H4K8la_peak_4317 | 10.04111 |                                                                                |
| 22 | 3.3E+07 | 3.3E+07 | KD2-H4K8la_peak_4318 | 9.45339  |                                                                                |
| 22 | 3.3E+07 | 3.3E+07 | KD2-H4K8la_peak_4319 | 7.19298  |                                                                                |
| 22 | 3.6E+07 | 3.6E+07 | KD2-H4K8la_peak_4320 | 4.72651  | HMGXB4_ENSG00000100281                                                         |
| 22 | 3.6E+07 | 3.6E+07 | KD2-H4K8la_peak_4321 | 9.00481  |                                                                                |
| 22 | 3.6E+07 | 3.6E+07 | KD2-H4K8la_peak_4322 | 12.56761 | RASD2_ENSG00000100302                                                          |

|    |         |         |                      |          |                                                                                                           |
|----|---------|---------|----------------------|----------|-----------------------------------------------------------------------------------------------------------|
| 22 | 3.6E+07 | 3.6E+07 | KD2-H4K8la_peak_4323 | 6.3399   |                                                                                                           |
| 22 | 3.6E+07 | 3.6E+07 | KD2-H4K8la_peak_4324 | 6.57426  |                                                                                                           |
| 22 | 3.6E+07 | 3.6E+07 | KD2-H4K8la_peak_4325 | 14.44261 |                                                                                                           |
| 22 | 3.6E+07 | 3.6E+07 | KD2-H4K8la_peak_4326 | 8.73956  |                                                                                                           |
| 22 | 3.6E+07 | 3.6E+07 | KD2-H4K8la_peak_4327 | 5.80888  |                                                                                                           |
| 22 | 3.7E+07 | 3.7E+07 | KD2-H4K8la_peak_4328 | 4.53273  |                                                                                                           |
| 22 | 3.8E+07 | 3.8E+07 | KD2-H4K8la_peak_4329 | 8.50453  | C1QTNF6_ENSG00000133466                                                                                   |
| 22 | 3.8E+07 | 3.8E+07 | KD2-H4K8la_peak_4330 | 6.22733  |                                                                                                           |
| 22 | 3.8E+07 | 3.8E+07 | KD2-H4K8la_peak_4331 | 5.05146  | CDC42EP1_ENSG00000128283                                                                                  |
| 22 | 3.8E+07 | 3.8E+07 | KD2-H4K8la_peak_4332 | 7.43378  |                                                                                                           |
| 22 | 3.8E+07 | 3.8E+07 | KD2-H4K8la_peak_4333 | 10.87112 |                                                                                                           |
| 22 | 3.8E+07 | 3.8E+07 | KD2-H4K8la_peak_4334 | 7.02162  | TRIOBP_ENSG00000100106                                                                                    |
| 22 | 3.8E+07 | 3.8E+07 | KD2-H4K8la_peak_4335 | 4.69635  |                                                                                                           |
| 22 | 3.8E+07 | 3.8E+07 | KD2-H4K8la_peak_4336 | 6.89612  |                                                                                                           |
| 22 | 3.8E+07 | 3.8E+07 | KD2-H4K8la_peak_4337 | 8.10373  | H1F0_ENSG00000189060                                                                                      |
| 22 | 3.8E+07 | 3.8E+07 | KD2-H4K8la_peak_4338 | 10.98662 | H1F0_ENSG00000189060                                                                                      |
| 22 | 3.8E+07 | 3.8E+07 | KD2-H4K8la_peak_4339 | 4.48891  | MICALL1_ENSG00000100139                                                                                   |
| 22 | 3.9E+07 | 3.9E+07 | KD2-H4K8la_peak_4340 | 5.36015  |                                                                                                           |
| 22 | 4E+07   | 4E+07   | KD2-H4K8la_peak_4341 | 9.86881  | ATF4_ENSG00000128272                                                                                      |
| 22 | 4.1E+07 | 4.1E+07 | KD2-H4K8la_peak_4342 | 5.72892  | MKL1_ENSG00000196588                                                                                      |
| 22 | 4.1E+07 | 4.1E+07 | KD2-H4K8la_peak_4343 | 12.14099 | EP300_ENSG00000100393;MIR1281_ENSG00000221160                                                             |
| 22 | 4.2E+07 | 4.2E+07 | KD2-H4K8la_peak_4344 | 7.72421  |                                                                                                           |
| 22 | 4.2E+07 | 4.2E+07 | KD2-H4K8la_peak_4345 | 6.70626  |                                                                                                           |
| 22 | 4.2E+07 | 4.2E+07 | KD2-H4K8la_peak_4346 | 9.72904  | FAM109B_ENSG00000177096                                                                                   |
| 22 | 4.2E+07 | 4.2E+07 | KD2-H4K8la_peak_4347 | 10.99007 | SMDT1_ENSG00000183172                                                                                     |
| 22 | 4.3E+07 | 4.3E+07 | KD2-H4K8la_peak_4348 | 5.72892  | CYB5R3_ENSG00000100243                                                                                    |
| 22 | 4.4E+07 | 4.4E+07 | KD2-H4K8la_peak_4349 | 4.69635  | SAMM50_ENSG00000100347                                                                                    |
| 22 | 4.4E+07 | 4.4E+07 | KD2-H4K8la_peak_4350 | 6.11881  |                                                                                                           |
| 22 | 4.5E+07 | 4.5E+07 | KD2-H4K8la_peak_4351 | 10.04111 |                                                                                                           |
| 22 | 4.5E+07 | 4.5E+07 | KD2-H4K8la_peak_4352 | 5.27672  |                                                                                                           |
| 22 | 4.6E+07 | 4.6E+07 | KD2-H4K8la_peak_4353 | 9.70191  | KIAA0930_ENSG00000100364                                                                                  |
| 22 | 4.6E+07 | 4.6E+07 | KD2-H4K8la_peak_4354 | 8.84474  | FAM118A_ENSG00000100376                                                                                   |
| 22 | 4.6E+07 | 4.6E+07 | KD2-H4K8la_peak_4355 | 6.03112  | CITF22-92A6.1_ENSG00000273145                                                                             |
| 22 | 4.6E+07 | 4.6E+07 | KD2-H4K8la_peak_4356 | 8.13727  | LINC00899_ENSG00000231711                                                                                 |
| 22 | 4.6E+07 | 4.6E+07 | KD2-H4K8la_peak_4357 | 8.43222  | LINC00899_ENSG00000231711                                                                                 |
| 22 | 4.6E+07 | 4.6E+07 | KD2-H4K8la_peak_4358 | 10.87112 | C22orf26_ENSG00000182257;FLJ27365_ENSG00000197182;RP6-109B7.5_ENSG00000273289;RP6-109B7.3_ENSG00000241990 |
| 22 | 4.6E+07 | 4.6E+07 | KD2-H4K8la_peak_4359 | 6.98743  |                                                                                                           |
| 22 | 4.6E+07 | 4.6E+07 | KD2-H4K8la_peak_4360 | 7.30722  | RP6-109B7.4_ENSG00000235159                                                                               |
| 22 | 4.7E+07 | 4.7E+07 | KD2-H4K8la_peak_4361 | 12.13455 | GTSE1_ENSG00000075218                                                                                     |
| 22 | 4.7E+07 | 4.7E+07 | KD2-H4K8la_peak_4362 | 11.15747 | GRAMD4_ENSG00000075240                                                                                    |
| 22 | 4.7E+07 | 4.7E+07 | KD2-H4K8la_peak_4363 | 5.0762   |                                                                                                           |
| 22 | 4.7E+07 | 4.7E+07 | KD2-H4K8la_peak_4364 | 5.58883  | CERK_ENSG00000100422                                                                                      |
| 22 | 4.9E+07 | 4.9E+07 | KD2-H4K8la_peak_4365 | 4.79631  |                                                                                                           |
| 22 | 4.9E+07 | 4.9E+07 | KD2-H4K8la_peak_4366 | 8.12047  |                                                                                                           |
| 22 | 4.9E+07 | 4.9E+07 | KD2-H4K8la_peak_4367 | 9.0516   |                                                                                                           |
| 22 | 5E+07   | 5E+07   | KD2-H4K8la_peak_4368 | 6.22999  |                                                                                                           |

|    |         |         |                      |          |                                                    |
|----|---------|---------|----------------------|----------|----------------------------------------------------|
| 22 | 5E+07   | 5E+07   | KD2-H4K8la_peak_4369 | 12.39432 | BRD1_ENSG00000100425                               |
| 22 | 5E+07   | 5E+07   | KD2-H4K8la_peak_4370 | 7.49467  |                                                    |
| 22 | 5.1E+07 | 5.1E+07 | KD2-H4K8la_peak_4371 | 7.60756  |                                                    |
| 22 | 5.1E+07 | 5.1E+07 | KD2-H4K8la_peak_4372 | 9.73848  | RP3-402G11.26_ENSG00000273253;SELO_ENSG00000073169 |
| 22 | 5.1E+07 | 5.1E+07 | KD2-H4K8la_peak_4373 | 5.05146  | MAPK12_ENSG00000188130                             |
| 22 | 5.1E+07 | 5.1E+07 | KD2-H4K8la_peak_4374 | 9.27415  | MAPK12_ENSG00000188130                             |
| 22 | 5.1E+07 | 5.1E+07 | KD2-H4K8la_peak_4375 | 6.89612  | MAPK11_ENSG00000185386                             |
| 22 | 5.1E+07 | 5.1E+07 | KD2-H4K8la_peak_4376 | 11.52725 | DENND6B_ENSG00000205593                            |
| 22 | 5.1E+07 | 5.1E+07 | KD2-H4K8la_peak_4377 | 8.06229  | SBF1_ENSG00000100241                               |
| 3  | 4344537 | 4344786 | KD2-H4K8la_peak_4378 | 5.58883  | SETMAR_ENSG00000170364                             |
| 3  | 4508669 | 4508875 | KD2-H4K8la_peak_4379 | 10.04111 | SUMF1_ENSG00000144455                              |
| 3  | 4509232 | 4509669 | KD2-H4K8la_peak_4380 | 9.90319  | SUMF1_ENSG00000144455                              |
| 3  | 4564527 | 4564777 | KD2-H4K8la_peak_4381 | 6.64643  |                                                    |
| 3  | 4575201 | 4575432 | KD2-H4K8la_peak_4382 | 4.86896  |                                                    |
| 3  | 4910483 | 4910718 | KD2-H4K8la_peak_4383 | 5.28047  |                                                    |
| 3  | 5069426 | 5069653 | KD2-H4K8la_peak_4384 | 7.72421  |                                                    |
| 3  | 5164146 | 5164429 | KD2-H4K8la_peak_4385 | 7.81267  | ARL8B_ENSG00000134108                              |
| 3  | 8691324 | 8691584 | KD2-H4K8la_peak_4386 | 4.69635  |                                                    |
| 3  | 8699475 | 8699741 | KD2-H4K8la_peak_4387 | 9.37576  |                                                    |
| 3  | 8700745 | 8701034 | KD2-H4K8la_peak_4388 | 5.83285  |                                                    |
| 3  | 9773507 | 9773731 | KD2-H4K8la_peak_4389 | 10.28981 | BRPF1_ENSG00000156983                              |
| 3  | 9811990 | 9812299 | KD2-H4K8la_peak_4390 | 6.3399   | CAMK1_ENSG00000134072                              |
| 3  | 9851866 | 9852165 | KD2-H4K8la_peak_4391 | 8.0046   |                                                    |
| 3  | 9905797 | 9906123 | KD2-H4K8la_peak_4392 | 6.36118  |                                                    |
| 3  | 9906488 | 9907002 | KD2-H4K8la_peak_4393 | 8.07102  |                                                    |
| 3  | 9931790 | 9932049 | KD2-H4K8la_peak_4394 | 11.06859 | JAGN1_ENSG00000171135                              |
| 3  | 9932471 | 9932771 | KD2-H4K8la_peak_4395 | 8.39919  | JAGN1_ENSG00000171135                              |
| 3  | 9957455 | 9957668 | KD2-H4K8la_peak_4396 | 5.43278  |                                                    |
| 3  | 9974943 | 9975240 | KD2-H4K8la_peak_4397 | 9.27415  | CRELD1_ENSG00000163703                             |
| 3  | 1.1E+07 | 1.1E+07 | KD2-H4K8la_peak_4398 | 11.15182 |                                                    |
| 3  | 1.2E+07 | 1.2E+07 | KD2-H4K8la_peak_4399 | 5.05146  | TAMM41_ENSG00000144559                             |
| 3  | 1.3E+07 | 1.3E+07 | KD2-H4K8la_peak_4400 | 9.78176  | RAF1_ENSG00000132155                               |
| 3  | 1.4E+07 | 1.4E+07 | KD2-H4K8la_peak_4401 | 8.76116  |                                                    |
| 3  | 1.4E+07 | 1.4E+07 | KD2-H4K8la_peak_4402 | 11.15747 |                                                    |
| 3  | 1.4E+07 | 1.4E+07 | KD2-H4K8la_peak_4403 | 9.45339  |                                                    |
| 3  | 1.4E+07 | 1.4E+07 | KD2-H4K8la_peak_4404 | 7.3993   | CHCHD4_ENSG00000163528;TMEM43_ENSG00000170876      |
| 3  | 1.5E+07 | 1.5E+07 | KD2-H4K8la_peak_4405 | 6.14571  |                                                    |
| 3  | 1.5E+07 | 1.5E+07 | KD2-H4K8la_peak_4406 | 6.36118  |                                                    |
| 3  | 1.7E+07 | 1.7E+07 | KD2-H4K8la_peak_4407 | 8.37064  |                                                    |
| 3  | 1.8E+07 | 1.8E+07 | KD2-H4K8la_peak_4408 | 6.83387  |                                                    |
| 3  | 2.8E+07 | 2.8E+07 | KD2-H4K8la_peak_4409 | 10.04111 | SLC4A7_ENSG00000033867                             |
| 3  | 2.8E+07 | 2.8E+07 | KD2-H4K8la_peak_4410 | 6.70626  | AC098614.2_ENSG00000213846                         |
| 3  | 2.8E+07 | 2.8E+07 | KD2-H4K8la_peak_4411 | 13.91009 | CMC1_ENSG00000187118                               |
| 3  | 2.9E+07 | 2.9E+07 | KD2-H4K8la_peak_4412 | 5.72892  |                                                    |
| 3  | 3.1E+07 | 3.1E+07 | KD2-H4K8la_peak_4413 | 7.30722  | TGFBR2_ENSG00000163513                             |
| 3  | 3.2E+07 | 3.2E+07 | KD2-H4K8la_peak_4414 | 11.15747 |                                                    |



|   |         |         |                      |          |                                                   |
|---|---------|---------|----------------------|----------|---------------------------------------------------|
| 3 | 3.3E+07 | 3.3E+07 | KD2-H4K8la_peak_4415 | 7.12014  | DYNC1LI1_ENSG00000144635                          |
| 3 | 3.7E+07 | 3.7E+07 | KD2-H4K8la_peak_4416 | 5.42108  |                                                   |
| 3 | 3.7E+07 | 3.7E+07 | KD2-H4K8la_peak_4417 | 7.90495  |                                                   |
| 3 | 3.7E+07 | 3.7E+07 | KD2-H4K8la_peak_4418 | 11.50321 | GOLGA4_ENSG00000144674                            |
| 3 | 3.7E+07 | 3.7E+07 | KD2-H4K8la_peak_4419 | 7.90495  | ITGA9_ENSG00000144668                             |
| 3 | 3.8E+07 | 3.8E+07 | KD2-H4K8la_peak_4420 | 10.00612 |                                                   |
| 3 | 3.8E+07 | 3.8E+07 | KD2-H4K8la_peak_4421 | 6.64804  |                                                   |
| 3 | 3.8E+07 | 3.8E+07 | KD2-H4K8la_peak_4422 | 8.37064  |                                                   |
| 3 | 3.8E+07 | 3.8E+07 | KD2-H4K8la_peak_4423 | 6.2278   |                                                   |
| 3 | 3.8E+07 | 3.8E+07 | KD2-H4K8la_peak_4424 | 7.90495  | MYD88_ENSG00000172936                             |
| 3 | 3.8E+07 | 3.8E+07 | KD2-H4K8la_peak_4425 | 7.94013  | ACVR2B-AS1_ENSG00000229589;ACVR2B_ENSG00000114739 |
| 3 | 3.9E+07 | 3.9E+07 | KD2-H4K8la_peak_4426 | 10.11868 |                                                   |
| 3 | 3.9E+07 | 3.9E+07 | KD2-H4K8la_peak_4427 | 8.76116  | SCN5A_ENSG00000183873                             |
| 3 | 3.9E+07 | 3.9E+07 | KD2-H4K8la_peak_4428 | 5.43278  | WDR48_ENSG00000114742                             |
| 3 | 3.9E+07 | 3.9E+07 | KD2-H4K8la_peak_4429 | 5.7631   | GORASP1_ENSG00000114745;TTC21A_ENSG00000168026    |
| 3 | 3.9E+07 | 3.9E+07 | KD2-H4K8la_peak_4430 | 7.49467  | SLC25A38_ENSG00000144659                          |
| 3 | 3.9E+07 | 3.9E+07 | KD2-H4K8la_peak_4431 | 6.89612  | RPSA_ENSG00000168028                              |
| 3 | 4.3E+07 | 4.3E+07 | KD2-H4K8la_peak_4432 | 5.16795  |                                                   |
| 3 | 4.3E+07 | 4.3E+07 | KD2-H4K8la_peak_4433 | 10.04111 | POMGNT2_ENSG00000144647                           |
| 3 | 4.4E+07 | 4.4E+07 | KD2-H4K8la_peak_4434 | 8.487    | ABHD5_ENSG0000011198                              |
| 3 | 4.5E+07 | 4.5E+07 | KD2-H4K8la_peak_4435 | 9.27415  | ZNF502_ENSG00000196653                            |
| 3 | 4.6E+07 | 4.6E+07 | KD2-H4K8la_peak_4436 | 7.60756  |                                                   |
| 3 | 4.6E+07 | 4.6E+07 | KD2-H4K8la_peak_4437 | 11.45154 |                                                   |
| 3 | 4.7E+07 | 4.7E+07 | KD2-H4K8la_peak_4438 | 6.86458  | TMIE_ENSG00000181585                              |
| 3 | 4.7E+07 | 4.7E+07 | KD2-H4K8la_peak_4439 | 7.51014  |                                                   |
| 3 | 4.7E+07 | 4.7E+07 | KD2-H4K8la_peak_4440 | 6.28277  | NBEAL2_ENSG00000160796                            |
| 3 | 4.7E+07 | 4.7E+07 | KD2-H4K8la_peak_4441 | 14.3505  |                                                   |
| 3 | 4.8E+07 | 4.8E+07 | KD2-H4K8la_peak_4442 | 4.86896  | SCAP_ENSG00000114650                              |
| 3 | 4.8E+07 | 4.8E+07 | KD2-H4K8la_peak_4443 | 6.40658  | ELP6_ENSG00000163832                              |
| 3 | 4.8E+07 | 4.8E+07 | KD2-H4K8la_peak_4444 | 5.58883  | DHX30_ENSG00000132153                             |
| 3 | 4.8E+07 | 4.8E+07 | KD2-H4K8la_peak_4445 | 8.50453  |                                                   |
| 3 | 4.8E+07 | 4.8E+07 | KD2-H4K8la_peak_4446 | 11.15182 | CDC25A_ENSG00000164045                            |
| 3 | 4.8E+07 | 4.8E+07 | KD2-H4K8la_peak_4447 | 4.3076   | NME6_ENSG00000172113                              |
| 3 | 4.9E+07 | 4.9E+07 | KD2-H4K8la_peak_4448 | 9.67249  | TREX1_ENSG00000213689                             |
| 3 | 4.9E+07 | 4.9E+07 | KD2-H4K8la_peak_4449 | 6.97699  |                                                   |
| 3 | 4.9E+07 | 4.9E+07 | KD2-H4K8la_peak_4450 | 12.13455 | UQCRC1_ENSG0000010256                             |
| 3 | 4.9E+07 | 4.9E+07 | KD2-H4K8la_peak_4451 | 7.3499   |                                                   |
| 3 | 4.9E+07 | 4.9E+07 | KD2-H4K8la_peak_4452 | 7.51302  |                                                   |
| 3 | 4.9E+07 | 4.9E+07 | KD2-H4K8la_peak_4453 | 19.29514 | WDR6_ENSG00000178252                              |
| 3 | 4.9E+07 | 4.9E+07 | KD2-H4K8la_peak_4454 | 18.68203 | DALRD3_ENSG00000178149                            |
| 3 | 4.9E+07 | 4.9E+07 | KD2-H4K8la_peak_4455 | 12.7738  | USP19_ENSG00000172046                             |
| 3 | 4.9E+07 | 4.9E+07 | KD2-H4K8la_peak_4456 | 9.61894  | USP19_ENSG00000172046                             |
| 3 | 4.9E+07 | 4.9E+07 | KD2-H4K8la_peak_4457 | 7.23932  | CCDC71_ENSG00000177352                            |
| 3 | 5E+07   | 5E+07   | KD2-H4K8la_peak_4458 | 10.90862 | APEH_ENSG00000164062                              |
| 3 | 5E+07   | 5E+07   | KD2-H4K8la_peak_4459 | 5.67596  |                                                   |
| 3 | 5E+07   | 5E+07   | KD2-H4K8la_peak_4460 | 7.51014  | MST1_ENSG00000173531;RNF123_ENSG00000164068       |

|   |         |         |                      |          |                                                                                                                 |
|---|---------|---------|----------------------|----------|-----------------------------------------------------------------------------------------------------------------|
| 3 | 5E+07   | 5E+07   | KD2-H4K8la_peak_4461 | 6.64804  | AMIGO3_ENSG00000176020;GMPPB_ENSG00000173540                                                                    |
| 3 | 5E+07   | 5E+07   | KD2-H4K8la_peak_4462 | 13.47548 | IP6K1_ENSG00000176095                                                                                           |
| 3 | 5E+07   | 5E+07   | KD2-H4K8la_peak_4463 | 5.58883  | MIR5193_ENSG00000263506                                                                                         |
| 3 | 5E+07   | 5E+07   | KD2-H4K8la_peak_4464 | 5.92398  | MON1A_ENSG00000164077                                                                                           |
| 3 | 5E+07   | 5E+07   | KD2-H4K8la_peak_4465 | 8.37064  | RBM6_ENSG00000004534                                                                                            |
| 3 | 5E+07   | 5E+07   | KD2-H4K8la_peak_4466 | 9.15937  |                                                                                                                 |
| 3 | 5E+07   | 5E+07   | KD2-H4K8la_peak_4467 | 11.81269 |                                                                                                                 |
| 3 | 5E+07   | 5E+07   | KD2-H4K8la_peak_4468 | 8.24908  |                                                                                                                 |
| 3 | 5E+07   | 5E+07   | KD2-H4K8la_peak_4469 | 8.3574   | U73166.2_ENSG00000230454                                                                                        |
| 3 | 5E+07   | 5E+07   | KD2-H4K8la_peak_4470 | 12.32641 |                                                                                                                 |
| 3 | 5E+07   | 5E+07   | KD2-H4K8la_peak_4471 | 5.66764  |                                                                                                                 |
| 3 | 5E+07   | 5E+07   | KD2-H4K8la_peak_4472 | 5.33301  |                                                                                                                 |
| 3 | 5E+07   | 5E+07   | KD2-H4K8la_peak_4473 | 8.55715  |                                                                                                                 |
| 3 | 5E+07   | 5E+07   | KD2-H4K8la_peak_4474 | 9.0261   |                                                                                                                 |
| 3 | 5E+07   | 5E+07   | KD2-H4K8la_peak_4475 | 8.97367  |                                                                                                                 |
| 3 | 5E+07   | 5E+07   | KD2-H4K8la_peak_4476 | 5.86422  |                                                                                                                 |
| 3 | 5E+07   | 5E+07   | KD2-H4K8la_peak_4477 | 10.31182 |                                                                                                                 |
| 3 | 5E+07   | 5E+07   | KD2-H4K8la_peak_4478 | 4.66279  |                                                                                                                 |
| 3 | 5E+07   | 5E+07   | KD2-H4K8la_peak_4479 | 10.48003 |                                                                                                                 |
| 3 | 5E+07   | 5E+07   | KD2-H4K8la_peak_4480 | 9.20163  |                                                                                                                 |
| 3 | 5E+07   | 5E+07   | KD2-H4K8la_peak_4481 | 6.63636  |                                                                                                                 |
| 3 | 5E+07   | 5E+07   | KD2-H4K8la_peak_4482 | 6.86458  |                                                                                                                 |
| 3 | 5E+07   | 5E+07   | KD2-H4K8la_peak_4483 | 15.18239 |                                                                                                                 |
| 3 | 5E+07   | 5E+07   | KD2-H4K8la_peak_4484 | 8.39919  |                                                                                                                 |
| 3 | 5E+07   | 5E+07   | KD2-H4K8la_peak_4485 | 10.3389  |                                                                                                                 |
| 3 | 5E+07   | 5E+07   | KD2-H4K8la_peak_4486 | 5.27164  |                                                                                                                 |
| 3 | 5E+07   | 5E+07   | KD2-H4K8la_peak_4487 | 9.6377   |                                                                                                                 |
| 3 | 5E+07   | 5E+07   | KD2-H4K8la_peak_4488 | 7.04068  |                                                                                                                 |
| 3 | 5.1E+07 | 5.1E+07 | KD2-H4K8la_peak_4489 | 7.56395  |                                                                                                                 |
| 3 | 5.1E+07 | 5.1E+07 | KD2-H4K8la_peak_4490 | 8.8932   |                                                                                                                 |
| 3 | 5.1E+07 | 5.1E+07 | KD2-H4K8la_peak_4491 | 6.9399   | CISH_ENSG00000114737;MAPKAPK3_ENSG00000114738                                                                   |
| 3 | 5.1E+07 | 5.1E+07 | KD2-H4K8la_peak_4492 | 6.64804  | MANF_ENSG00000145050                                                                                            |
| 3 | 5.2E+07 | 5.2E+07 | KD2-H4K8la_peak_4493 | 7.13237  |                                                                                                                 |
| 3 | 5.2E+07 | 5.2E+07 | KD2-H4K8la_peak_4494 | 6.25288  |                                                                                                                 |
| 3 | 5.2E+07 | 5.2E+07 | KD2-H4K8la_peak_4495 | 5.58883  | GPR62_ENSG00000180929                                                                                           |
| 3 | 5.2E+07 | 5.2E+07 | KD2-H4K8la_peak_4496 | 5.05146  |                                                                                                                 |
| 3 | 5.2E+07 | 5.2E+07 | KD2-H4K8la_peak_4497 | 11.90267 | PCBP4_ENSG00000090097                                                                                           |
| 3 | 5.2E+07 | 5.2E+07 | KD2-H4K8la_peak_4498 | 9.84972  | PCBP4_ENSG00000090097                                                                                           |
| 3 | 5.2E+07 | 5.2E+07 | KD2-H4K8la_peak_4499 | 9.20163  | RP11-155D18.14_ENSG00000272762;RP11-155D18.12_ENSG00000254782                                                   |
| 3 | 5.2E+07 | 5.2E+07 | KD2-H4K8la_peak_4500 | 9.05604  | RP11-155D18.14_ENSG00000272762;RP11-155D18.12_ENSG00000254782;ACY1_ENSG00000243989;ABHD14A-ACY1_ENSG00000114786 |
| 3 | 5.2E+07 | 5.2E+07 | KD2-H4K8la_peak_4501 | 9.41817  | RPL29_ENSG00000162244                                                                                           |
| 3 | 5.2E+07 | 5.2E+07 | KD2-H4K8la_peak_4502 | 10.49982 |                                                                                                                 |
| 3 | 5.2E+07 | 5.2E+07 | KD2-H4K8la_peak_4503 | 11.15747 |                                                                                                                 |
| 3 | 5.2E+07 | 5.2E+07 | KD2-H4K8la_peak_4504 | 6.48828  |                                                                                                                 |
| 3 | 5.2E+07 | 5.2E+07 | KD2-H4K8la_peak_4505 | 9.93742  |                                                                                                                 |
| 3 | 5.2E+07 | 5.2E+07 | KD2-H4K8la_peak_4506 | 17.22831 |                                                                                                                 |

|   |         |         |                      |          |                                                                         |
|---|---------|---------|----------------------|----------|-------------------------------------------------------------------------|
| 3 | 5.2E+07 | 5.2E+07 | KD2-H4K8la_peak_4507 | 10.49982 |                                                                         |
| 3 | 5.2E+07 | 5.2E+07 | KD2-H4K8la_peak_4508 | 6.36118  | ALAS1_ENSG00000023330                                                   |
| 3 | 5.2E+07 | 5.2E+07 | KD2-H4K8la_peak_4509 | 11.40266 | TLR9_ENSG00000239732;TWF2_ENSG00000247596;RP5-1157M23.2_ENSG00000243224 |
| 3 | 5.2E+07 | 5.2E+07 | KD2-H4K8la_peak_4510 | 12.13455 | WDR82_ENSG00000164091                                                   |
| 3 | 5.2E+07 | 5.2E+07 | KD2-H4K8la_peak_4511 | 12.25633 |                                                                         |
| 3 | 5.2E+07 | 5.2E+07 | KD2-H4K8la_peak_4512 | 6.13507  |                                                                         |
| 3 | 5.2E+07 | 5.2E+07 | KD2-H4K8la_peak_4513 | 6.13507  |                                                                         |
| 3 | 5.2E+07 | 5.2E+07 | KD2-H4K8la_peak_4514 | 5.33301  |                                                                         |
| 3 | 5.2E+07 | 5.2E+07 | KD2-H4K8la_peak_4515 | 6.3399   | NISCH_ENSG00000010322                                                   |
| 3 | 5.3E+07 | 5.3E+07 | KD2-H4K8la_peak_4516 | 7.9076   |                                                                         |
| 3 | 5.3E+07 | 5.3E+07 | KD2-H4K8la_peak_4517 | 8.23729  |                                                                         |
| 3 | 5.4E+07 | 5.4E+07 | KD2-H4K8la_peak_4518 | 8.76116  | CACNA1D_ENSG00000157388                                                 |
| 3 | 5.4E+07 | 5.4E+07 | KD2-H4K8la_peak_4519 | 9.0413   |                                                                         |
| 3 | 5.4E+07 | 5.4E+07 | KD2-H4K8la_peak_4520 | 4.86896  | CHDH_ENSG00000016391;IL17RB_ENSG00000056736                             |
| 3 | 5.7E+07 | 5.7E+07 | KD2-H4K8la_peak_4521 | 13.20018 | FAM208A_ENSG00000163946                                                 |
| 3 | 5.7E+07 | 5.7E+07 | KD2-H4K8la_peak_4522 | 8.37064  |                                                                         |
| 3 | 5.7E+07 | 5.7E+07 | KD2-H4K8la_peak_4523 | 7.68279  |                                                                         |
| 3 | 5.7E+07 | 5.7E+07 | KD2-H4K8la_peak_4524 | 8.13727  | IL17RD_ENSG00000144730                                                  |
| 3 | 5.8E+07 | 5.8E+07 | KD2-H4K8la_peak_4525 | 8.07102  | DENND6A_ENSG00000174839;RP11-755B10.3_ENSG00000241933                   |
| 3 | 5.8E+07 | 5.8E+07 | KD2-H4K8la_peak_4526 | 6.64804  | RP11-359I18.5_ENSG00000272360;KCTD6_ENSG00000168301                     |
| 3 | 5.9E+07 | 5.9E+07 | KD2-H4K8la_peak_4527 | 10.98662 | C3orf67_ENSG00000163689                                                 |
| 3 | 6.1E+07 | 6.1E+07 | KD2-H4K8la_peak_4528 | 11.15747 | FHIT_ENSG00000189283                                                    |
| 3 | 6.5E+07 | 6.5E+07 | KD2-H4K8la_peak_4529 | 5.36015  |                                                                         |
| 3 | 6.5E+07 | 6.5E+07 | KD2-H4K8la_peak_4530 | 9.94613  |                                                                         |
| 3 | 6.8E+07 | 6.8E+07 | KD2-H4K8la_peak_4531 | 6.86458  | SUCLG2_ENSG00000172340;RP11-81N13.1_ENSG00000241316                     |
| 3 | 6.8E+07 | 6.8E+07 | KD2-H4K8la_peak_4532 | 10.62798 | SUCLG2_ENSG00000172340;RP11-81N13.1_ENSG00000241316                     |
| 3 | 7.2E+07 | 7.2E+07 | KD2-H4K8la_peak_4533 | 4.86896  |                                                                         |
| 3 | 7.2E+07 | 7.2E+07 | KD2-H4K8la_peak_4534 | 6.89612  | LINC00870_ENSG00000243083                                               |
| 3 | 7.2E+07 | 7.2E+07 | KD2-H4K8la_peak_4535 | 7.49467  |                                                                         |
| 3 | 7.2E+07 | 7.2E+07 | KD2-H4K8la_peak_4536 | 4.86896  |                                                                         |
| 3 | 7.3E+07 | 7.3E+07 | KD2-H4K8la_peak_4537 | 5.05146  |                                                                         |
| 3 | 7.6E+07 | 7.6E+07 | KD2-H4K8la_peak_4538 | 11.15747 | ZNF717_ENSG00000227124                                                  |
| 3 | 8.6E+07 | 8.6E+07 | KD2-H4K8la_peak_4539 | 8.487    |                                                                         |
| 3 | 1E+08   | 1E+08   | KD2-H4K8la_peak_4540 | 7.09021  | TBC1D23_ENSG00000036054                                                 |
| 3 | 1.1E+08 | 1.1E+08 | KD2-H4K8la_peak_4541 | 8.39919  | RP11-115H18.1_ENSG00000273125                                           |
| 3 | 1.1E+08 | 1.1E+08 | KD2-H4K8la_peak_4542 | 11.7362  | RP11-115H18.1_ENSG00000273125                                           |
| 3 | 1.1E+08 | 1.1E+08 | KD2-H4K8la_peak_4543 | 10.91646 | CD47_ENSG00000196776                                                    |
| 3 | 1.1E+08 | 1.1E+08 | KD2-H4K8la_peak_4544 | 6.2278   | ZBTB20_ENSG00000181722                                                  |
| 3 | 1.2E+08 | 1.2E+08 | KD2-H4K8la_peak_4545 | 5.47284  | RP11-326J18.1_ENSG00000241596                                           |
| 3 | 1.2E+08 | 1.2E+08 | KD2-H4K8la_peak_4546 | 8.44557  | ARHGAP31_ENSG00000031081                                                |
| 3 | 1.2E+08 | 1.2E+08 | KD2-H4K8la_peak_4547 | 7.13237  |                                                                         |
| 3 | 1.2E+08 | 1.2E+08 | KD2-H4K8la_peak_4548 | 8.35736  |                                                                         |
| 3 | 1.2E+08 | 1.2E+08 | KD2-H4K8la_peak_4549 | 10.52788 |                                                                         |
| 3 | 1.2E+08 | 1.2E+08 | KD2-H4K8la_peak_4550 | 8.07102  | PARP9_ENSG00000138496;DTX3L_ENSG00000163840                             |
| 3 | 1.2E+08 | 1.2E+08 | KD2-H4K8la_peak_4551 | 6.42754  |                                                                         |
| 3 | 1.2E+08 | 1.2E+08 | KD2-H4K8la_peak_4552 | 7.87573  |                                                                         |

|   |         |         |                      |          |                                               |
|---|---------|---------|----------------------|----------|-----------------------------------------------|
| 3 | 1.2E+08 | 1.2E+08 | KD2-H4K8la_peak_4553 | 5.88616  |                                               |
| 3 | 1.2E+08 | 1.2E+08 | KD2-H4K8la_peak_4554 | 9.87983  |                                               |
| 3 | 1.2E+08 | 1.2E+08 | KD2-H4K8la_peak_4555 | 8.37064  |                                               |
| 3 | 1.2E+08 | 1.2E+08 | KD2-H4K8la_peak_4556 | 7.06427  |                                               |
| 3 | 1.2E+08 | 1.2E+08 | KD2-H4K8la_peak_4557 | 7.92775  |                                               |
| 3 | 1.2E+08 | 1.2E+08 | KD2-H4K8la_peak_4558 | 8.19799  |                                               |
| 3 | 1.2E+08 | 1.2E+08 | KD2-H4K8la_peak_4559 | 7.51014  |                                               |
| 3 | 1.3E+08 | 1.3E+08 | KD2-H4K8la_peak_4560 | 9.11321  | ZNF148_ENSG00000163848                        |
| 3 | 1.3E+08 | 1.3E+08 | KD2-H4K8la_peak_4561 | 6.3399   |                                               |
| 3 | 1.3E+08 | 1.3E+08 | KD2-H4K8la_peak_4562 | 9.61894  |                                               |
| 3 | 1.3E+08 | 1.3E+08 | KD2-H4K8la_peak_4563 | 5.05917  |                                               |
| 3 | 1.3E+08 | 1.3E+08 | KD2-H4K8la_peak_4564 | 10.18169 |                                               |
| 3 | 1.3E+08 | 1.3E+08 | KD2-H4K8la_peak_4565 | 6.32736  |                                               |
| 3 | 1.3E+08 | 1.3E+08 | KD2-H4K8la_peak_4566 | 6.88507  |                                               |
| 3 | 1.3E+08 | 1.3E+08 | KD2-H4K8la_peak_4567 | 9.9701   | TPRA1_ENSG00000163870;MCM2_ENSG00000073111    |
| 3 | 1.3E+08 | 1.3E+08 | KD2-H4K8la_peak_4568 | 10.04111 | PODXL2_ENSG00000114631                        |
| 3 | 1.3E+08 | 1.3E+08 | KD2-H4K8la_peak_4569 | 6.39807  |                                               |
| 3 | 1.3E+08 | 1.3E+08 | KD2-H4K8la_peak_4570 | 7.78805  |                                               |
| 3 | 1.3E+08 | 1.3E+08 | KD2-H4K8la_peak_4571 | 10.87112 |                                               |
| 3 | 1.3E+08 | 1.3E+08 | KD2-H4K8la_peak_4572 | 5.84385  |                                               |
| 3 | 1.3E+08 | 1.3E+08 | KD2-H4K8la_peak_4573 | 7.4908   |                                               |
| 3 | 1.3E+08 | 1.3E+08 | KD2-H4K8la_peak_4574 | 8.86558  | RUVBL1_ENSG00000175792;EEFSEC_ENSG00000132394 |
| 3 | 1.3E+08 | 1.3E+08 | KD2-H4K8la_peak_4575 | 9.05604  |                                               |
| 3 | 1.3E+08 | 1.3E+08 | KD2-H4K8la_peak_4576 | 5.468    |                                               |
| 3 | 1.3E+08 | 1.3E+08 | KD2-H4K8la_peak_4577 | 7.82875  |                                               |
| 3 | 1.3E+08 | 1.3E+08 | KD2-H4K8la_peak_4578 | 9.47897  |                                               |
| 3 | 1.3E+08 | 1.3E+08 | KD2-H4K8la_peak_4579 | 6.56022  |                                               |
| 3 | 1.3E+08 | 1.3E+08 | KD2-H4K8la_peak_4580 | 5.24027  |                                               |
| 3 | 1.3E+08 | 1.3E+08 | KD2-H4K8la_peak_4581 | 13.11393 |                                               |
| 3 | 1.3E+08 | 1.3E+08 | KD2-H4K8la_peak_4582 | 6.69137  |                                               |
| 3 | 1.3E+08 | 1.3E+08 | KD2-H4K8la_peak_4583 | 6.64804  |                                               |
| 3 | 1.3E+08 | 1.3E+08 | KD2-H4K8la_peak_4584 | 12.45558 |                                               |
| 3 | 1.3E+08 | 1.3E+08 | KD2-H4K8la_peak_4585 | 12.35074 |                                               |
| 3 | 1.3E+08 | 1.3E+08 | KD2-H4K8la_peak_4586 | 6.75222  |                                               |
| 3 | 1.3E+08 | 1.3E+08 | KD2-H4K8la_peak_4587 | 5.90392  | DNAJB8_ENSG00000179407                        |
| 3 | 1.3E+08 | 1.3E+08 | KD2-H4K8la_peak_4588 | 7.23932  |                                               |
| 3 | 1.3E+08 | 1.3E+08 | KD2-H4K8la_peak_4589 | 9.37943  | RP11-475N22.4_ENSG00000244300                 |
| 3 | 1.3E+08 | 1.3E+08 | KD2-H4K8la_peak_4590 | 5.76044  |                                               |
| 3 | 1.3E+08 | 1.3E+08 | KD2-H4K8la_peak_4591 | 11.91891 |                                               |
| 3 | 1.3E+08 | 1.3E+08 | KD2-H4K8la_peak_4592 | 14.23294 |                                               |
| 3 | 1.3E+08 | 1.3E+08 | KD2-H4K8la_peak_4593 | 7.83588  |                                               |
| 3 | 1.3E+08 | 1.3E+08 | KD2-H4K8la_peak_4594 | 6.48366  |                                               |
| 3 | 1.3E+08 | 1.3E+08 | KD2-H4K8la_peak_4595 | 4.7338   | RPN1_ENSG00000163902                          |
| 3 | 1.3E+08 | 1.3E+08 | KD2-H4K8la_peak_4596 | 9.66714  |                                               |
| 3 | 1.3E+08 | 1.3E+08 | KD2-H4K8la_peak_4597 | 7.92775  |                                               |
| 3 | 1.3E+08 | 1.3E+08 | KD2-H4K8la_peak_4598 | 6.86458  | CNBP_ENSG00000169714                          |

|   |         |         |                      |          |                                                                            |
|---|---------|---------|----------------------|----------|----------------------------------------------------------------------------|
| 3 | 1.3E+08 | 1.3E+08 | KD2-H4K8la_peak_4599 | 5.22084  | H1FX_ENSG00000184897                                                       |
| 3 | 1.3E+08 | 1.3E+08 | KD2-H4K8la_peak_4600 | 4.30663  | RPL32P3_ENSG00000251474                                                    |
| 3 | 1.3E+08 | 1.3E+08 | KD2-H4K8la_peak_4601 | 4.7338   | TMCC1_ENSG00000172765;TMCC1-AS1_ENSG00000271270                            |
| 3 | 1.3E+08 | 1.3E+08 | KD2-H4K8la_peak_4602 | 10.04111 | PIK3R4_ENSG00000196455                                                     |
| 3 | 1.3E+08 | 1.3E+08 | KD2-H4K8la_peak_4603 | 7.49467  | RAB6B_ENSG00000154917                                                      |
| 3 | 1.3E+08 | 1.3E+08 | KD2-H4K8la_peak_4604 | 9.35473  | ANAPC13_ENSG00000129055;CEP63_ENSG00000182923                              |
| 3 | 1.4E+08 | 1.4E+08 | KD2-H4K8la_peak_4605 | 11.06859 | NME9_ENSG00000181322                                                       |
| 3 | 1.4E+08 | 1.4E+08 | KD2-H4K8la_peak_4606 | 7.30722  | MRAS_ENSG00000158186                                                       |
| 3 | 1.4E+08 | 1.4E+08 | KD2-H4K8la_peak_4607 | 6.64804  | FAIM_ENSG00000158234                                                       |
| 3 | 1.4E+08 | 1.4E+08 | KD2-H4K8la_peak_4608 | 8.31696  |                                                                            |
| 3 | 1.4E+08 | 1.4E+08 | KD2-H4K8la_peak_4609 | 6.01825  |                                                                            |
| 3 | 1.4E+08 | 1.4E+08 | KD2-H4K8la_peak_4610 | 7.90495  | RBP1_ENSG00000114115                                                       |
| 3 | 1.4E+08 | 1.4E+08 | KD2-H4K8la_peak_4611 | 5.83285  |                                                                            |
| 3 | 1.4E+08 | 1.4E+08 | KD2-H4K8la_peak_4612 | 8.31696  |                                                                            |
| 3 | 1.4E+08 | 1.4E+08 | KD2-H4K8la_peak_4613 | 7.51014  | GK5_ENSG00000175066                                                        |
| 3 | 1.4E+08 | 1.4E+08 | KD2-H4K8la_peak_4614 | 9.38376  | ATR_ENSG00000175054                                                        |
| 3 | 1.4E+08 | 1.4E+08 | KD2-H4K8la_peak_4615 | 6.64804  | RP11-91G21.1_ENSG00000268129                                               |
| 3 | 1.5E+08 | 1.5E+08 | KD2-H4K8la_peak_4616 | 4.98386  | GYG1_ENSG00000163754                                                       |
| 3 | 1.6E+08 | 1.6E+08 | KD2-H4K8la_peak_4617 | 9.70817  | LINC00886_ENSG00000240875                                                  |
| 3 | 1.6E+08 | 1.6E+08 | KD2-H4K8la_peak_4618 | 10.04111 | PTX3_ENSG00000163661                                                       |
| 3 | 1.6E+08 | 1.6E+08 | KD2-H4K8la_peak_4619 | 8.37064  |                                                                            |
| 3 | 1.6E+08 | 1.6E+08 | KD2-H4K8la_peak_4620 | 9.70817  | RARRES1_ENSG00000118849;MFSD1_ENSG00000118855;RP11-379F4.4_ENSG00000240207 |
| 3 | 1.6E+08 | 1.6E+08 | KD2-H4K8la_peak_4621 | 5.90392  |                                                                            |
| 3 | 1.6E+08 | 1.6E+08 | KD2-H4K8la_peak_4622 | 5.24865  |                                                                            |
| 3 | 1.6E+08 | 1.6E+08 | KD2-H4K8la_peak_4623 | 4.30663  |                                                                            |
| 3 | 1.7E+08 | 1.7E+08 | KD2-H4K8la_peak_4624 | 8.37064  | TERC_ENSG00000270141                                                       |
| 3 | 1.7E+08 | 1.7E+08 | KD2-H4K8la_peak_4625 | 5.67034  | PRKCI_ENSG00000163558                                                      |
| 3 | 1.7E+08 | 1.7E+08 | KD2-H4K8la_peak_4626 | 4.71418  |                                                                            |
| 3 | 1.8E+08 | 1.8E+08 | KD2-H4K8la_peak_4627 | 8.7731   | TBL1XR1_ENSG00000177565                                                    |
| 3 | 1.8E+08 | 1.8E+08 | KD2-H4K8la_peak_4628 | 13.3197  |                                                                            |
| 3 | 1.8E+08 | 1.8E+08 | KD2-H4K8la_peak_4629 | 6.56573  | MFN1_ENSG00000171109                                                       |
| 3 | 1.8E+08 | 1.8E+08 | KD2-H4K8la_peak_4630 | 9.05604  | RP11-496B10.3_ENSG00000239774;TTC14_ENSG00000163728                        |
| 3 | 1.8E+08 | 1.8E+08 | KD2-H4K8la_peak_4631 | 5.33364  |                                                                            |
| 3 | 1.8E+08 | 1.8E+08 | KD2-H4K8la_peak_4632 | 6.3399   |                                                                            |
| 3 | 1.8E+08 | 1.8E+08 | KD2-H4K8la_peak_4633 | 10.5885  |                                                                            |
| 3 | 1.8E+08 | 1.8E+08 | KD2-H4K8la_peak_4634 | 6.26214  | RP11-225N10.1_ENSG00000240063;ATP11B_ENSG00000058063                       |
| 3 | 1.8E+08 | 1.8E+08 | KD2-H4K8la_peak_4635 | 6.61963  | LAMP3_ENSG00000078081                                                      |
| 3 | 1.8E+08 | 1.8E+08 | KD2-H4K8la_peak_4636 | 7.61975  |                                                                            |
| 3 | 1.8E+08 | 1.8E+08 | KD2-H4K8la_peak_4637 | 6.0136   |                                                                            |
| 3 | 1.8E+08 | 1.8E+08 | KD2-H4K8la_peak_4638 | 7.30722  | PARL_ENSG00000175193;RP11-315J22.5_ENSG00000234371                         |
| 3 | 1.8E+08 | 1.8E+08 | KD2-H4K8la_peak_4639 | 8.65116  | ABCC5_ENSG00000114770                                                      |
| 3 | 1.8E+08 | 1.8E+08 | KD2-H4K8la_peak_4640 | 6.07357  | ALG3_ENSG00000214160;ECE2_ENSG00000145194                                  |
| 3 | 1.8E+08 | 1.8E+08 | KD2-H4K8la_peak_4641 | 8.07102  | PSMD2_ENSG00000175166                                                      |
| 3 | 1.8E+08 | 1.8E+08 | KD2-H4K8la_peak_4642 | 6.3399   | EIF4G1_ENSG00000114867                                                     |
| 3 | 1.8E+08 | 1.8E+08 | KD2-H4K8la_peak_4643 | 8.44557  |                                                                            |
| 3 | 1.8E+08 | 1.8E+08 | KD2-H4K8la_peak_4644 | 10.76886 |                                                                            |

|   |         |         |                      |          |                                                                                    |
|---|---------|---------|----------------------|----------|------------------------------------------------------------------------------------|
| 3 | 1.8E+08 | 1.8E+08 | KD2-H4K8la_peak_4645 | 6.25288  |                                                                                    |
| 3 | 1.8E+08 | 1.8E+08 | KD2-H4K8la_peak_4646 | 8.15454  |                                                                                    |
| 3 | 1.8E+08 | 1.8E+08 | KD2-H4K8la_peak_4647 | 9.27415  |                                                                                    |
| 3 | 1.8E+08 | 1.8E+08 | KD2-H4K8la_peak_4648 | 5.84082  |                                                                                    |
| 3 | 1.8E+08 | 1.8E+08 | KD2-H4K8la_peak_4649 | 9.61894  |                                                                                    |
| 3 | 1.9E+08 | 1.9E+08 | KD2-H4K8la_peak_4650 | 5.27164  | TMEM41A_ENSG00000163900                                                            |
| 3 | 1.9E+08 | 1.9E+08 | KD2-H4K8la_peak_4651 | 7.96951  |                                                                                    |
| 3 | 1.9E+08 | 1.9E+08 | KD2-H4K8la_peak_4652 | 5.58883  |                                                                                    |
| 3 | 1.9E+08 | 1.9E+08 | KD2-H4K8la_peak_4653 | 6.89612  | ST6GAL1_ENSG00000073849                                                            |
| 3 | 1.9E+08 | 1.9E+08 | KD2-H4K8la_peak_4654 | 8.77936  | UTS2B_ENSG00000188958;CCDC50_ENSG00000152492                                       |
| 3 | 1.9E+08 | 1.9E+08 | KD2-H4K8la_peak_4655 | 5.67034  | ATP13A4_ENSG00000127249;RP11-175P19.2_ENSG00000236297;OPA1_ENSG00000198836         |
| 3 | 1.9E+08 | 1.9E+08 | KD2-H4K8la_peak_4656 | 5.43278  |                                                                                    |
| 3 | 1.9E+08 | 1.9E+08 | KD2-H4K8la_peak_4657 | 8.76082  |                                                                                    |
| 3 | 1.9E+08 | 1.9E+08 | KD2-H4K8la_peak_4658 | 6.3399   |                                                                                    |
| 3 | 2E+08   | 2E+08   | KD2-H4K8la_peak_4659 | 6.3399   |                                                                                    |
| 3 | 2E+08   | 2E+08   | KD2-H4K8la_peak_4660 | 6.3399   |                                                                                    |
| 3 | 2E+08   | 2E+08   | KD2-H4K8la_peak_4661 | 6.70626  |                                                                                    |
| 3 | 2E+08   | 2E+08   | KD2-H4K8la_peak_4662 | 10.27262 | SDHAP1_ENSG00000185485                                                             |
| 3 | 2E+08   | 2E+08   | KD2-H4K8la_peak_4663 | 6.68593  |                                                                                    |
| 3 | 2E+08   | 2E+08   | KD2-H4K8la_peak_4664 | 11.06859 |                                                                                    |
| 3 | 2E+08   | 2E+08   | KD2-H4K8la_peak_4665 | 6.86458  | RP11-447L10.1_ENSG00000272741;TCTEX1D2_ENSG00000213123;TM4SF19-AS1_ENSG00000235897 |
| 3 | 2E+08   | 2E+08   | KD2-H4K8la_peak_4666 | 13.3197  | RNF168_ENSG00000163961                                                             |
| 3 | 2E+08   | 2E+08   | KD2-H4K8la_peak_4667 | 5.05146  | LINC01063_ENSG00000232065                                                          |
| 3 | 2E+08   | 2E+08   | KD2-H4K8la_peak_4668 | 8.07102  | LINC01063_ENSG00000232065                                                          |
| 3 | 2E+08   | 2E+08   | KD2-H4K8la_peak_4669 | 6.61963  | PIGZ_ENSG00000119227                                                               |
| 3 | 2E+08   | 2E+08   | KD2-H4K8la_peak_4670 | 8.37064  |                                                                                    |
| 3 | 2E+08   | 2E+08   | KD2-H4K8la_peak_4671 | 8.76116  |                                                                                    |
| 3 | 2E+08   | 2E+08   | KD2-H4K8la_peak_4672 | 10.04113 | MFI2_ENSG00000163975                                                               |
| 3 | 2E+08   | 2E+08   | KD2-H4K8la_peak_4673 | 6.51326  | DLG1-AS1_ENSG00000227375                                                           |
| 3 | 2E+08   | 2E+08   | KD2-H4K8la_peak_4674 | 7.19298  |                                                                                    |
| 3 | 2E+08   | 2E+08   | KD2-H4K8la_peak_4675 | 8.0046   |                                                                                    |
| 3 | 2E+08   | 2E+08   | KD2-H4K8la_peak_4676 | 8.50453  |                                                                                    |
| 3 | 2E+08   | 2E+08   | KD2-H4K8la_peak_4677 | 9.38376  | AC024560.3_ENSG00000214135                                                         |
| 4 | 330305  | 330855  | KD2-H4K8la_peak_4678 | 6.57319  | RP11-478C6.1_ENSG00000251535;ZNF141_ENSG00000131127                                |
| 4 | 467297  | 467848  | KD2-H4K8la_peak_4679 | 6.2278   | ABCA11P_ENSG00000251595                                                            |
| 4 | 493100  | 493305  | KD2-H4K8la_peak_4680 | 5.10388  | ZNF721_ENSG00000182903;PIGG_ENSG00000174227                                        |
| 4 | 657007  | 657427  | KD2-H4K8la_peak_4681 | 7.12014  |                                                                                    |
| 4 | 657661  | 657873  | KD2-H4K8la_peak_4682 | 7.12014  |                                                                                    |
| 4 | 658193  | 658513  | KD2-H4K8la_peak_4683 | 8.43222  |                                                                                    |
| 4 | 668435  | 668937  | KD2-H4K8la_peak_4684 | 9.18773  | ATP5I_ENSG00000169020                                                              |
| 4 | 674687  | 674945  | KD2-H4K8la_peak_4685 | 5.58883  |                                                                                    |
| 4 | 699747  | 700031  | KD2-H4K8la_peak_4686 | 10.87112 | PCGF3_ENSG00000185619                                                              |
| 4 | 776842  | 777137  | KD2-H4K8la_peak_4687 | 8.65988  |                                                                                    |
| 4 | 967589  | 967809  | KD2-H4K8la_peak_4688 | 10.02595 |                                                                                    |
| 4 | 1187905 | 1188647 | KD2-H4K8la_peak_4689 | 10.28981 |                                                                                    |
| 4 | 1193593 | 1193803 | KD2-H4K8la_peak_4690 | 8.07102  |                                                                                    |

|   |         |         |                      |          |                                                  |
|---|---------|---------|----------------------|----------|--------------------------------------------------|
| 4 | 1242123 | 1242427 | KD2-H4K8la_peak_4691 | 5.8369   | CTBP1-AS2_ENSG00000196810                        |
| 4 | 1243327 | 1243825 | KD2-H4K8la_peak_4692 | 8.39919  | CTBP1_ENSG00000159692;CTBP1-AS2_ENSG00000196810  |
| 4 | 1340097 | 1340557 | KD2-H4K8la_peak_4693 | 12.76394 | UVSSA_ENSG00000163945                            |
| 4 | 1686375 | 1686749 | KD2-H4K8la_peak_4694 | 12.39776 | FAM53A_ENSG00000174137                           |
| 4 | 1723282 | 1723807 | KD2-H4K8la_peak_4695 | 4.75945  | TMEM129_ENSG00000168936;TACC3_ENSG00000013810    |
| 4 | 1768800 | 1769014 | KD2-H4K8la_peak_4696 | 5.58883  |                                                  |
| 4 | 1872371 | 1872617 | KD2-H4K8la_peak_4697 | 6.47266  | WHSC1_ENSG00000109685                            |
| 4 | 2060282 | 2060608 | KD2-H4K8la_peak_4698 | 6.54311  | NAT8L_ENSG00000185818                            |
| 4 | 2264431 | 2264720 | KD2-H4K8la_peak_4699 | 5.22616  | MXD4_ENSG00000123933                             |
| 4 | 2470078 | 2470492 | KD2-H4K8la_peak_4700 | 11.87032 |                                                  |
| 4 | 2537473 | 2537732 | KD2-H4K8la_peak_4701 | 10.74378 |                                                  |
| 4 | 2757686 | 2757982 | KD2-H4K8la_peak_4702 | 9.0413   | TNIP2_ENSG00000168884                            |
| 4 | 2758504 | 2758797 | KD2-H4K8la_peak_4703 | 6.3399   | TNIP2_ENSG00000168884                            |
| 4 | 2800458 | 2800762 | KD2-H4K8la_peak_4704 | 6.47589  |                                                  |
| 4 | 2820093 | 2820610 | KD2-H4K8la_peak_4705 | 14.30428 |                                                  |
| 4 | 2936710 | 2937256 | KD2-H4K8la_peak_4706 | 7.49467  | MFSD10_ENSG00000109736;NOP14-AS1_ENSG00000249673 |
| 4 | 3534504 | 3534724 | KD2-H4K8la_peak_4707 | 5.98775  | LRPAP1_ENSG00000163956                           |
| 4 | 3659816 | 3660131 | KD2-H4K8la_peak_4708 | 5.83285  |                                                  |
| 4 | 4249683 | 4249891 | KD2-H4K8la_peak_4709 | 9.0413   | TMEM128_ENSG00000132406                          |
| 4 | 5958499 | 5958720 | KD2-H4K8la_peak_4710 | 4.30663  |                                                  |
| 4 | 6711929 | 6712216 | KD2-H4K8la_peak_4711 | 13.14519 | MRFAP1L1_ENSG00000178988                         |
| 4 | 6784697 | 6785152 | KD2-H4K8la_peak_4712 | 6.64804  |                                                  |
| 4 | 7228543 | 7229221 | KD2-H4K8la_peak_4713 | 8.56027  |                                                  |
| 4 | 7414461 | 7414677 | KD2-H4K8la_peak_4714 | 9.1923   |                                                  |
| 4 | 7882169 | 7882454 | KD2-H4K8la_peak_4715 | 7.96951  |                                                  |
| 4 | 7905041 | 7905410 | KD2-H4K8la_peak_4716 | 7.12014  |                                                  |
| 4 | 7907548 | 7908000 | KD2-H4K8la_peak_4717 | 7.49467  |                                                  |
| 4 | 7908414 | 7908691 | KD2-H4K8la_peak_4718 | 11.06859 |                                                  |
| 4 | 7912357 | 7912628 | KD2-H4K8la_peak_4719 | 8.07102  |                                                  |
| 4 | 8052668 | 8052899 | KD2-H4K8la_peak_4720 | 8.37064  |                                                  |
| 4 | 8609898 | 8610102 | KD2-H4K8la_peak_4721 | 6.47589  |                                                  |
| 4 | 8706019 | 8706640 | KD2-H4K8la_peak_4722 | 7.81267  |                                                  |
| 4 | 9154012 | 9154269 | KD2-H4K8la_peak_4723 | 16.13355 | FAM86KP_ENSG00000163612                          |
| 4 | 9382687 | 9383027 | KD2-H4K8la_peak_4724 | 15.75402 |                                                  |
| 4 | 9692910 | 9693299 | KD2-H4K8la_peak_4725 | 5.40949  | FAM86MP_ENSG00000186234                          |
| 4 | 1.5E+07 | 1.5E+07 | KD2-H4K8la_peak_4726 | 12.39776 | CPEB2-AS1_ENSG00000247624;CPEB2_ENSG00000137449  |
| 4 | 1.6E+07 | 1.6E+07 | KD2-H4K8la_peak_4727 | 15.33728 |                                                  |
| 4 | 1.6E+07 | 1.6E+07 | KD2-H4K8la_peak_4728 | 7.8597   | FBXL5_ENSG00000118564;FAM200B_ENSG00000237765    |
| 4 | 1.6E+07 | 1.6E+07 | KD2-H4K8la_peak_4729 | 6.2278   | TAPT1_ENSG00000169762;TAPT1-AS1_ENSG00000263327  |
| 4 | 1.7E+07 | 1.7E+07 | KD2-H4K8la_peak_4730 | 8.76082  |                                                  |
| 4 | 1.8E+07 | 1.8E+07 | KD2-H4K8la_peak_4731 | 8.77936  |                                                  |
| 4 | 1.8E+07 | 1.8E+07 | KD2-H4K8la_peak_4732 | 4.79631  |                                                  |
| 4 | 1.8E+07 | 1.8E+07 | KD2-H4K8la_peak_4733 | 6.2278   | LCORL_ENSG00000178177                            |
| 4 | 2.5E+07 | 2.5E+07 | KD2-H4K8la_peak_4734 | 6.71169  | DHX15_ENSG00000109606                            |
| 4 | 2.5E+07 | 2.5E+07 | KD2-H4K8la_peak_4735 | 9.72904  | DHX15_ENSG00000109606                            |
| 4 | 3.9E+07 | 3.9E+07 | KD2-H4K8la_peak_4736 | 4.69635  | KLF3_ENSG00000109787                             |

|   |         |         |                      |          |                                                                               |
|---|---------|---------|----------------------|----------|-------------------------------------------------------------------------------|
| 4 | 3.9E+07 | 3.9E+07 | KD2-H4K8la_peak_4737 | 12.31762 | RP11-617D20.1_ENSG00000231160;AC021860.1_ENSG00000196355;KLF3_ENSG00000109787 |
| 4 | 4E+07   | 4E+07   | KD2-H4K8la_peak_4738 | 6.0136   |                                                                               |
| 4 | 4E+07   | 4E+07   | KD2-H4K8la_peak_4739 | 9.66714  | RP11-333E13.4_ENSG00000205794;N4BP2_ENSG00000078177                           |
| 4 | 4E+07   | 4E+07   | KD2-H4K8la_peak_4740 | 6.86458  | RP11-333E13.4_ENSG00000205794;N4BP2_ENSG00000078177                           |
| 4 | 4E+07   | 4E+07   | KD2-H4K8la_peak_4741 | 6.0136   | RP11-333E13.4_ENSG00000205794;N4BP2_ENSG00000078177                           |
| 4 | 4.1E+07 | 4.1E+07 | KD2-H4K8la_peak_4742 | 5.83285  |                                                                               |
| 4 | 4.2E+07 | 4.2E+07 | KD2-H4K8la_peak_4743 | 6.3399   |                                                                               |
| 4 | 4.2E+07 | 4.2E+07 | KD2-H4K8la_peak_4744 | 9.27415  | RP11-227F19.2_ENSG00000249122                                                 |
| 4 | 4.2E+07 | 4.2E+07 | KD2-H4K8la_peak_4745 | 6.01825  |                                                                               |
| 4 | 4.2E+07 | 4.2E+07 | KD2-H4K8la_peak_4746 | 7.78021  |                                                                               |
| 4 | 4.2E+07 | 4.2E+07 | KD2-H4K8la_peak_4747 | 9.08387  |                                                                               |
| 4 | 4.2E+07 | 4.2E+07 | KD2-H4K8la_peak_4748 | 4.86896  |                                                                               |
| 4 | 4.2E+07 | 4.2E+07 | KD2-H4K8la_peak_4749 | 13.73095 | LINC00682_ENSG00000245870                                                     |
| 4 | 4.2E+07 | 4.2E+07 | KD2-H4K8la_peak_4750 | 7.83588  |                                                                               |
| 4 | 4.7E+07 | 4.7E+07 | KD2-H4K8la_peak_4751 | 5.95337  | COMMD8_ENSG00000169019                                                        |
| 4 | 4.8E+07 | 4.8E+07 | KD2-H4K8la_peak_4752 | 7.22716  | NFXL1_ENSG00000170448;NIPAL1_ENSG00000163293                                  |
| 4 | 4.8E+07 | 4.8E+07 | KD2-H4K8la_peak_4753 | 4.86896  | TEC_ENSG00000135605                                                           |
| 4 | 4.8E+07 | 4.8E+07 | KD2-H4K8la_peak_4754 | 7.51014  | SLC10A4_ENSG00000145248                                                       |
| 4 | 5.4E+07 | 5.4E+07 | KD2-H4K8la_peak_4755 | 8.37064  | USP46_ENSG00000109189;USP46-AS1_ENSG00000248866                               |
| 4 | 5.4E+07 | 5.4E+07 | KD2-H4K8la_peak_4756 | 8.13727  | ERVMER34-1_ENSG00000226887;AC104066.1_ENSG00000266656                         |
| 4 | 5.4E+07 | 5.4E+07 | KD2-H4K8la_peak_4757 | 6.70058  |                                                                               |
| 4 | 5.4E+07 | 5.4E+07 | KD2-H4K8la_peak_4758 | 7.92775  |                                                                               |
| 4 | 5.4E+07 | 5.4E+07 | KD2-H4K8la_peak_4759 | 6.03964  |                                                                               |
| 4 | 5.4E+07 | 5.4E+07 | KD2-H4K8la_peak_4760 | 5.40949  | FIP1L1_ENSG00000145216                                                        |
| 4 | 5.4E+07 | 5.4E+07 | KD2-H4K8la_peak_4761 | 7.23116  | FIP1L1_ENSG00000145216                                                        |
| 4 | 5.6E+07 | 5.6E+07 | KD2-H4K8la_peak_4762 | 7.23116  | KIT_ENSG00000157404                                                           |
| 4 | 5.6E+07 | 5.6E+07 | KD2-H4K8la_peak_4763 | 8.76082  | SRD5A3-AS1_ENSG00000249700;TMEM165_ENSG00000134851                            |
| 4 | 5.7E+07 | 5.7E+07 | KD2-H4K8la_peak_4764 | 21.33961 |                                                                               |
| 4 | 5.8E+07 | 5.8E+07 | KD2-H4K8la_peak_4765 | 6.47589  | REST_ENSG00000084093                                                          |
| 4 | 7.2E+07 | 7.2E+07 | KD2-H4K8la_peak_4766 | 8.12047  | GRSF1_ENSG00000132463                                                         |
| 4 | 7.7E+07 | 7.7E+07 | KD2-H4K8la_peak_4767 | 8.07102  |                                                                               |
| 4 | 7.7E+07 | 7.7E+07 | KD2-H4K8la_peak_4768 | 8.07102  | FAM47E-STBD1_ENSG00000272414;FAM47E-STBD1_ENSG00000118804                     |
| 4 | 7.7E+07 | 7.7E+07 | KD2-H4K8la_peak_4769 | 6.70626  | FAM47E-STBD1_ENSG00000272414;FAM47E-STBD1_ENSG00000118804                     |
| 4 | 7.7E+07 | 7.7E+07 | KD2-H4K8la_peak_4770 | 9.9701   | CCDC158_ENSG00000163749                                                       |
| 4 | 7.8E+07 | 7.8E+07 | KD2-H4K8la_peak_4771 | 9.11321  |                                                                               |
| 4 | 7.8E+07 | 7.8E+07 | KD2-H4K8la_peak_4772 | 8.07102  | CCNI_ENSG00000118816                                                          |
| 4 | 7.9E+07 | 7.9E+07 | KD2-H4K8la_peak_4773 | 8.31696  | CNOT6L_ENSG00000138767                                                        |
| 4 | 7.9E+07 | 7.9E+07 | KD2-H4K8la_peak_4774 | 5.43278  | FRAS1_ENSG00000138759                                                         |
| 4 | 8.1E+07 | 8.1E+07 | KD2-H4K8la_peak_4775 | 8.39919  |                                                                               |
| 4 | 8.1E+07 | 8.1E+07 | KD2-H4K8la_peak_4776 | 6.64804  | FGF5_ENSG00000138675                                                          |
| 4 | 8.3E+07 | 8.3E+07 | KD2-H4K8la_peak_4777 | 7.12014  | HNRNPDL_ENSG00000152795;ENOPH1_ENSG00000145293                                |
| 4 | 8.8E+07 | 8.8E+07 | KD2-H4K8la_peak_4778 | 7.13237  |                                                                               |
| 4 | 8.8E+07 | 8.8E+07 | KD2-H4K8la_peak_4779 | 6.26214  |                                                                               |
| 4 | 8.9E+07 | 8.9E+07 | KD2-H4K8la_peak_4780 | 4.75945  | HERC5_ENSG00000138646                                                         |
| 4 | 9.6E+07 | 9.6E+07 | KD2-H4K8la_peak_4781 | 4.90581  |                                                                               |
| 4 | 9.6E+07 | 9.6E+07 | KD2-H4K8la_peak_4782 | 5.43278  | RP11-168E14.1_ENSG00000249599;BMPR1B_ENSG00000138696                          |



|   |         |         |                      |          |                                                     |
|---|---------|---------|----------------------|----------|-----------------------------------------------------|
| 4 | 9.6E+07 | 9.6E+07 | KD2-H4K8la_peak_4783 | 7.72421  |                                                     |
| 4 | 9.6E+07 | 9.6E+07 | KD2-H4K8la_peak_4784 | 8.77936  |                                                     |
| 4 | 9.6E+07 | 9.6E+07 | KD2-H4K8la_peak_4785 | 5.40949  | UNC5C_ENSG00000182168;RP11-710C12.1_ENSG00000271474 |
| 4 | 1E+08   | 1E+08   | KD2-H4K8la_peak_4786 | 8.07102  |                                                     |
| 4 | 1E+08   | 1E+08   | KD2-H4K8la_peak_4787 | 10.90862 | RP11-10L12.4_ENSG00000246560                        |
| 4 | 1.1E+08 | 1.1E+08 | KD2-H4K8la_peak_4788 | 8.86558  | TET2_ENSG00000168769                                |
| 4 | 1.1E+08 | 1.1E+08 | KD2-H4K8la_peak_4789 | 8.487    | AIMP1_ENSG00000164022                               |
| 4 | 1.1E+08 | 1.1E+08 | KD2-H4K8la_peak_4790 | 5.72892  | RP11-602N24.3_ENSG00000272795;GAR1_ENSG00000109534  |
| 4 | 1.1E+08 | 1.1E+08 | KD2-H4K8la_peak_4791 | 4.80784  | RP11-602N24.3_ENSG00000272795;GAR1_ENSG00000109534  |
| 4 | 1.1E+08 | 1.1E+08 | KD2-H4K8la_peak_4792 | 6.86458  |                                                     |
| 4 | 1.1E+08 | 1.1E+08 | KD2-H4K8la_peak_4793 | 7.51014  |                                                     |
| 4 | 1.1E+08 | 1.1E+08 | KD2-H4K8la_peak_4794 | 6.2278   |                                                     |
| 4 | 1.2E+08 | 1.2E+08 | KD2-H4K8la_peak_4795 | 7.61975  | PRDM5_ENSG00000138738                               |
| 4 | 1.3E+08 | 1.3E+08 | KD2-H4K8la_peak_4796 | 7.23116  | INTU_ENSG00000164066                                |
| 4 | 1.3E+08 | 1.3E+08 | KD2-H4K8la_peak_4797 | 14.91688 | LARP1B_ENSG00000138709                              |
| 4 | 1.3E+08 | 1.3E+08 | KD2-H4K8la_peak_4798 | 8.77936  |                                                     |
| 4 | 1.4E+08 | 1.4E+08 | KD2-H4K8la_peak_4799 | 5.58883  |                                                     |
| 4 | 1.4E+08 | 1.4E+08 | KD2-H4K8la_peak_4800 | 4.86896  | NDUFC1_ENSG00000109390;NAA15_ENSG00000164134        |
| 4 | 1.4E+08 | 1.4E+08 | KD2-H4K8la_peak_4801 | 4.75945  |                                                     |
| 4 | 1.4E+08 | 1.4E+08 | KD2-H4K8la_peak_4802 | 8.23729  |                                                     |
| 4 | 1.4E+08 | 1.4E+08 | KD2-H4K8la_peak_4803 | 9.73848  |                                                     |
| 4 | 1.4E+08 | 1.4E+08 | KD2-H4K8la_peak_4804 | 4.30289  |                                                     |
| 4 | 1.4E+08 | 1.4E+08 | KD2-H4K8la_peak_4805 | 6.64804  |                                                     |
| 4 | 1.4E+08 | 1.4E+08 | KD2-H4K8la_peak_4806 | 13.29476 |                                                     |
| 4 | 1.4E+08 | 1.4E+08 | KD2-H4K8la_peak_4807 | 5.89088  |                                                     |
| 4 | 1.4E+08 | 1.4E+08 | KD2-H4K8la_peak_4808 | 9.19451  |                                                     |
| 4 | 1.5E+08 | 1.5E+08 | KD2-H4K8la_peak_4809 | 7.19298  | SMAD1_ENSG00000170365                               |
| 4 | 1.5E+08 | 1.5E+08 | KD2-H4K8la_peak_4810 | 7.51302  | MMAA_ENSG00000151611                                |
| 4 | 1.5E+08 | 1.5E+08 | KD2-H4K8la_peak_4811 | 12.13455 |                                                     |
| 4 | 1.5E+08 | 1.5E+08 | KD2-H4K8la_peak_4812 | 5.89483  |                                                     |
| 4 | 1.5E+08 | 1.5E+08 | KD2-H4K8la_peak_4813 | 10.97039 |                                                     |
| 4 | 1.5E+08 | 1.5E+08 | KD2-H4K8la_peak_4814 | 7.61975  | RP11-6L6.7_ENSG00000251010                          |
| 4 | 1.5E+08 | 1.5E+08 | KD2-H4K8la_peak_4815 | 5.27672  |                                                     |
| 4 | 1.5E+08 | 1.5E+08 | KD2-H4K8la_peak_4816 | 6.40658  | SH3D19_ENSG00000109686                              |
| 4 | 1.5E+08 | 1.5E+08 | KD2-H4K8la_peak_4817 | 6.88801  |                                                     |
| 4 | 1.5E+08 | 1.5E+08 | KD2-H4K8la_peak_4818 | 11.45154 | PET112_ENSG00000059691                              |
| 4 | 1.5E+08 | 1.5E+08 | KD2-H4K8la_peak_4819 | 7.56395  | FBXW7_ENSG00000109670;MIR4453_ENSG00000268471       |
| 4 | 1.5E+08 | 1.5E+08 | KD2-H4K8la_peak_4820 | 5.33364  | TRIM2_ENSG00000109654                               |
| 4 | 1.5E+08 | 1.5E+08 | KD2-H4K8la_peak_4821 | 9.27415  |                                                     |
| 4 | 1.5E+08 | 1.5E+08 | KD2-H4K8la_peak_4822 | 6.96161  | RNF175_ENSG00000145428                              |
| 4 | 1.7E+08 | 1.7E+08 | KD2-H4K8la_peak_4823 | 5.72892  |                                                     |
| 4 | 1.7E+08 | 1.7E+08 | KD2-H4K8la_peak_4824 | 7.13237  | RP11-10K16.1_ENSG00000245213;GALNT7_ENSG00000109586 |
| 4 | 1.7E+08 | 1.7E+08 | KD2-H4K8la_peak_4825 | 6.28277  | HMGB2_ENSG00000164104                               |
| 4 | 1.7E+08 | 1.7E+08 | KD2-H4K8la_peak_4826 | 4.53273  |                                                     |
| 4 | 1.7E+08 | 1.7E+08 | KD2-H4K8la_peak_4827 | 7.77341  |                                                     |
| 4 | 1.7E+08 | 1.7E+08 | KD2-H4K8la_peak_4828 | 14.15376 |                                                     |

|   |         |         |                      |          |                                                                               |
|---|---------|---------|----------------------|----------|-------------------------------------------------------------------------------|
| 4 | 1.7E+08 | 1.7E+08 | KD2-H4K8la_peak_4829 | 4.53763  |                                                                               |
| 4 | 1.7E+08 | 1.7E+08 | KD2-H4K8la_peak_4830 | 6.68593  | HAND2_ENSG00000164107                                                         |
| 4 | 1.7E+08 | 1.7E+08 | KD2-H4K8la_peak_4831 | 6.2624   |                                                                               |
| 4 | 1.7E+08 | 1.7E+08 | KD2-H4K8la_peak_4832 | 4.75945  |                                                                               |
| 4 | 1.8E+08 | 1.8E+08 | KD2-H4K8la_peak_4833 | 7.49467  | AC108142.1_ENSG00000177822;TENM3_ENSG00000218336;RP11-402C9.1_ENSG00000248266 |
| 4 | 1.8E+08 | 1.8E+08 | KD2-H4K8la_peak_4834 | 5.83285  | RP11-188P17.2_ENSG00000272646                                                 |
| 4 | 1.8E+08 | 1.8E+08 | KD2-H4K8la_peak_4835 | 6.3399   | DCTD_ENSG00000129187                                                          |
| 4 | 1.8E+08 | 1.8E+08 | KD2-H4K8la_peak_4836 | 6.64804  |                                                                               |
| 4 | 1.8E+08 | 1.8E+08 | KD2-H4K8la_peak_4837 | 5.89088  | CDKN2AIP_ENSG00000168564                                                      |
| 4 | 1.8E+08 | 1.8E+08 | KD2-H4K8la_peak_4838 | 10.92449 | ING2_ENSG00000168556                                                          |
| 4 | 1.8E+08 | 1.8E+08 | KD2-H4K8la_peak_4839 | 11.40266 |                                                                               |
| 4 | 1.9E+08 | 1.9E+08 | KD2-H4K8la_peak_4840 | 8.65116  |                                                                               |
| 4 | 1.9E+08 | 1.9E+08 | KD2-H4K8la_peak_4841 | 4.37527  |                                                                               |
| 4 | 1.9E+08 | 1.9E+08 | KD2-H4K8la_peak_4842 | 10.49982 |                                                                               |
| 4 | 1.9E+08 | 1.9E+08 | KD2-H4K8la_peak_4843 | 4.69635  | SNX25_ENSG00000109762                                                         |
| 4 | 1.9E+08 | 1.9E+08 | KD2-H4K8la_peak_4844 | 6.47266  | LRP2BP_ENSG00000109771;ANKRD37_ENSG00000186352                                |
| 4 | 1.9E+08 | 1.9E+08 | KD2-H4K8la_peak_4845 | 9.35473  | FAM149A_ENSG00000109794                                                       |
| 4 | 1.9E+08 | 1.9E+08 | KD2-H4K8la_peak_4846 | 6.3399   | AC110771.1_ENSG00000269302;CYP4V2_ENSG00000145476                             |
| 4 | 1.9E+08 | 1.9E+08 | KD2-H4K8la_peak_4847 | 6.3399   | AC110771.1_ENSG00000269302;CYP4V2_ENSG00000145476                             |
| 4 | 1.9E+08 | 1.9E+08 | KD2-H4K8la_peak_4848 | 7.13237  |                                                                               |
| 4 | 1.9E+08 | 1.9E+08 | KD2-H4K8la_peak_4849 | 5.54909  |                                                                               |
| 4 | 1.9E+08 | 1.9E+08 | KD2-H4K8la_peak_4850 | 4.75945  | AF146191.4_ENSG00000245685;FRG1_ENSG00000109536                               |
| 5 | 91452   | 91911   | KD2-H4K8la_peak_4851 | 17.87302 | CTD-2231H16.1_ENSG00000249430                                                 |
| 5 | 218562  | 218886  | KD2-H4K8la_peak_4852 | 7.49467  | CCDC127_ENSG00000164366;SDHA_ENSG00000073578                                  |
| 5 | 343793  | 344014  | KD2-H4K8la_peak_4853 | 7.13237  |                                                                               |
| 5 | 472838  | 473088  | KD2-H4K8la_peak_4854 | 6.3399   | CTD-2228K2.5_ENSG00000188242;CTD-2228K2.7_ENSG00000225138                     |
| 5 | 1345516 | 1345833 | KD2-H4K8la_peak_4855 | 11.7362  | CLPTM1L_ENSG00000049656                                                       |
| 5 | 1524199 | 1524715 | KD2-H4K8la_peak_4856 | 9.35473  | LPCAT1_ENSG00000153395                                                        |
| 5 | 1594810 | 1595274 | KD2-H4K8la_peak_4857 | 14.09647 | SDHAP3_ENSG00000185986;CTD-2012J19.3_ENSG00000271119                          |
| 5 | 5026313 | 5026727 | KD2-H4K8la_peak_4858 | 7.61975  |                                                                               |
| 5 | 5318233 | 5318465 | KD2-H4K8la_peak_4859 | 10.04111 |                                                                               |
| 5 | 5712936 | 5713146 | KD2-H4K8la_peak_4860 | 8.39919  |                                                                               |
| 5 | 6197391 | 6197604 | KD2-H4K8la_peak_4861 | 5.58883  |                                                                               |
| 5 | 6378291 | 6378574 | KD2-H4K8la_peak_4862 | 13.11108 | MED10_ENSG00000133398                                                         |
| 5 | 1E+07   | 1E+07   | KD2-H4K8la_peak_4863 | 9.81238  | FAM173B_ENSG00000150756;CCT5_ENSG00000150753                                  |
| 5 | 1E+07   | 1E+07   | KD2-H4K8la_peak_4864 | 7.05576  | CTD-2256P15.2_ENSG00000259802;MARCH6_ENSG00000145495                          |
| 5 | 1.1E+07 | 1.1E+07 | KD2-H4K8la_peak_4865 | 11.36807 |                                                                               |
| 5 | 1.1E+07 | 1.1E+07 | KD2-H4K8la_peak_4866 | 6.2278   |                                                                               |
| 5 | 1.3E+07 | 1.3E+07 | KD2-H4K8la_peak_4867 | 7.51302  | RP11-308B16.2_ENSG00000248783;CT49_ENSG00000248131                            |
| 5 | 1.5E+07 | 1.5E+07 | KD2-H4K8la_peak_4868 | 7.51302  | CTD-2165H16.4_ENSG00000261360;FAM105B_ENSG00000154124                         |
| 5 | 1.6E+07 | 1.6E+07 | KD2-H4K8la_peak_4869 | 6.89612  | ZNF622_ENSG00000173545                                                        |
| 5 | 3.2E+07 | 3.2E+07 | KD2-H4K8la_peak_4870 | 5.16795  |                                                                               |
| 5 | 3.2E+07 | 3.2E+07 | KD2-H4K8la_peak_4871 | 8.487    |                                                                               |
| 5 | 3.2E+07 | 3.2E+07 | KD2-H4K8la_peak_4872 | 6.96161  | ZFR_ENSG00000056097                                                           |
| 5 | 3.4E+07 | 3.4E+07 | KD2-H4K8la_peak_4873 | 26.17414 |                                                                               |
| 5 | 3.4E+07 | 3.4E+07 | KD2-H4K8la_peak_4874 | 19.93595 |                                                                               |

|   |         |         |                      |          |                                                           |
|---|---------|---------|----------------------|----------|-----------------------------------------------------------|
| 5 | 3.4E+07 | 3.4E+07 | KD2-H4K8la_peak_4875 | 17.41456 |                                                           |
| 5 | 3.6E+07 | 3.6E+07 | KD2-H4K8la_peak_4876 | 8.77936  |                                                           |
| 5 | 3.7E+07 | 3.7E+07 | KD2-H4K8la_peak_4877 | 9.73848  | C5orf42_ENSG00000197603                                   |
| 5 | 4.1E+07 | 4.1E+07 | KD2-H4K8la_peak_4878 | 6.61495  | RPL37_ENSG00000145592                                     |
| 5 | 4.2E+07 | 4.2E+07 | KD2-H4K8la_peak_4879 | 8.07102  | FBXO4_ENSG00000151876                                     |
| 5 | 4.2E+07 | 4.2E+07 | KD2-H4K8la_peak_4880 | 7.13237  | FBXO4_ENSG00000151876                                     |
| 5 | 4.3E+07 | 4.3E+07 | KD2-H4K8la_peak_4881 | 6.2278   | CTD-2201E18.5_ENSG00000271788                             |
| 5 | 4.3E+07 | 4.3E+07 | KD2-H4K8la_peak_4882 | 9.27765  | C5orf28_ENSG00000151881;RP11-159F24.3_ENSG00000249492     |
| 5 | 4.4E+07 | 4.4E+07 | KD2-H4K8la_peak_4883 | 11.06859 |                                                           |
| 5 | 4.5E+07 | 4.5E+07 | KD2-H4K8la_peak_4884 | 6.2278   | RP11-53O19.1_ENSG00000251141;MRPS30_ENSG00000112996       |
| 5 | 5E+07   | 5E+07   | KD2-H4K8la_peak_4885 | 8.89875  | CTD-2089N3.2_ENSG00000251573;CTD-2089N3.3_ENSG00000248918 |
| 5 | 5.1E+07 | 5.1E+07 | KD2-H4K8la_peak_4886 | 7.96951  | ISL1_ENSG00000016082                                      |
| 5 | 5.1E+07 | 5.1E+07 | KD2-H4K8la_peak_4887 | 6.60114  |                                                           |
| 5 | 5.4E+07 | 5.4E+07 | KD2-H4K8la_peak_4888 | 7.49467  | ARL15_ENSG00000185305                                     |
| 5 | 5.4E+07 | 5.4E+07 | KD2-H4K8la_peak_4889 | 6.47589  | SNX18_ENSG00000178996                                     |
| 5 | 5.6E+07 | 5.6E+07 | KD2-H4K8la_peak_4890 | 6.11881  |                                                           |
| 5 | 5.6E+07 | 5.6E+07 | KD2-H4K8la_peak_4891 | 5.05146  |                                                           |
| 5 | 5.6E+07 | 5.6E+07 | KD2-H4K8la_peak_4892 | 5.33364  | MAP3K1_ENSG00000095015                                    |
| 5 | 5.8E+07 | 5.8E+07 | KD2-H4K8la_peak_4893 | 6.70626  |                                                           |
| 5 | 5.9E+07 | 5.9E+07 | KD2-H4K8la_peak_4894 | 7.23116  |                                                           |
| 5 | 6.4E+07 | 6.4E+07 | KD2-H4K8la_peak_4895 | 6.70626  |                                                           |
| 5 | 6.4E+07 | 6.4E+07 | KD2-H4K8la_peak_4896 | 6.64804  |                                                           |
| 5 | 6.4E+07 | 6.4E+07 | KD2-H4K8la_peak_4897 | 5.05917  |                                                           |
| 5 | 6.5E+07 | 6.5E+07 | KD2-H4K8la_peak_4898 | 5.27164  | CTD-2033C11.1_ENSG00000269961;ERBB2IP_ENSG00000112851     |
| 5 | 6.6E+07 | 6.6E+07 | KD2-H4K8la_peak_4899 | 11.25405 |                                                           |
| 5 | 6.7E+07 | 6.7E+07 | KD2-H4K8la_peak_4900 | 11.15747 |                                                           |
| 5 | 6.8E+07 | 6.8E+07 | KD2-H4K8la_peak_4901 | 10.83384 | SLC30A5_ENSG00000145740                                   |
| 5 | 6.9E+07 | 6.9E+07 | KD2-H4K8la_peak_4902 | 5.89088  | CCDC125_ENSG00000183323;CHCHD2P2_ENSG00000215006          |
| 5 | 6.9E+07 | 6.9E+07 | KD2-H4K8la_peak_4903 | 6.2278   |                                                           |
| 5 | 6.9E+07 | 6.9E+07 | KD2-H4K8la_peak_4904 | 6.68593  |                                                           |
| 5 | 7.1E+07 | 7.1E+07 | KD2-H4K8la_peak_4905 | 5.05146  |                                                           |
| 5 | 7.2E+07 | 7.2E+07 | KD2-H4K8la_peak_4906 | 10.00612 | CTD-2376I4.2_ENSG00000272081;FCHO2_ENSG00000157107        |
| 5 | 7.4E+07 | 7.4E+07 | KD2-H4K8la_peak_4907 | 4.44972  |                                                           |
| 5 | 7.5E+07 | 7.5E+07 | KD2-H4K8la_peak_4908 | 5.16795  |                                                           |
| 5 | 7.5E+07 | 7.5E+07 | KD2-H4K8la_peak_4909 | 6.26214  | POC5_ENSG00000152359                                      |
| 5 | 7.5E+07 | 7.5E+07 | KD2-H4K8la_peak_4910 | 5.83285  | CTC-235G5.3_ENSG00000248127                               |
| 5 | 7.7E+07 | 7.7E+07 | KD2-H4K8la_peak_4911 | 5.84082  |                                                           |
| 5 | 7.8E+07 | 7.8E+07 | KD2-H4K8la_peak_4912 | 9.96333  |                                                           |
| 5 | 7.9E+07 | 7.9E+07 | KD2-H4K8la_peak_4913 | 4.79631  |                                                           |
| 5 | 7.9E+07 | 7.9E+07 | KD2-H4K8la_peak_4914 | 4.69635  | MTX3_ENSG00000177034;THBS4_ENSG00000113296                |
| 5 | 7.9E+07 | 7.9E+07 | KD2-H4K8la_peak_4915 | 5.69935  |                                                           |
| 5 | 8.1E+07 | 8.1E+07 | KD2-H4K8la_peak_4916 | 6.86458  | SSBP2_ENSG00000145687                                     |
| 5 | 8.6E+07 | 8.6E+07 | KD2-H4K8la_peak_4917 | 8.07102  | COX7C_ENSG00000127184                                     |
| 5 | 8.7E+07 | 8.7E+07 | KD2-H4K8la_peak_4918 | 4.79631  |                                                           |
| 5 | 9E+07   | 9E+07   | KD2-H4K8la_peak_4919 | 7.13237  | CETN3_ENSG00000153140;AC093510.1_ENSG00000255647          |
| 5 | 9.1E+07 | 9.1E+07 | KD2-H4K8la_peak_4920 | 5.43278  |                                                           |

|   |         |         |                      |          |                                                       |
|---|---------|---------|----------------------|----------|-------------------------------------------------------|
| 5 | 9.4E+07 | 9.4E+07 | KD2-H4K8la_peak_4921 | 7.72421  |                                                       |
| 5 | 9.5E+07 | 9.5E+07 | KD2-H4K8la_peak_4922 | 7.81267  | GPR150_ENSG00000178015                                |
| 5 | 9.5E+07 | 9.5E+07 | KD2-H4K8la_peak_4923 | 11.15747 |                                                       |
| 5 | 9.5E+07 | 9.5E+07 | KD2-H4K8la_peak_4924 | 7.51302  | RFESD_ENSG00000175449                                 |
| 5 | 9.6E+07 | 9.6E+07 | KD2-H4K8la_peak_4925 | 8.48488  | ERAP1_ENSG00000164307                                 |
| 5 | 1.1E+08 | 1.1E+08 | KD2-H4K8la_peak_4926 | 5.36015  |                                                       |
| 5 | 1.1E+08 | 1.1E+08 | KD2-H4K8la_peak_4927 | 10.36046 | EFNA5_ENSG00000184349                                 |
| 5 | 1.1E+08 | 1.1E+08 | KD2-H4K8la_peak_4928 | 10.04111 | FBXL17_ENSG00000145743                                |
| 5 | 1.1E+08 | 1.1E+08 | KD2-H4K8la_peak_4929 | 7.72421  |                                                       |
| 5 | 1.1E+08 | 1.1E+08 | KD2-H4K8la_peak_4930 | 10.28981 | STARD4_ENSG00000164211;STARD4-AS1_ENSG00000246859     |
| 5 | 1.1E+08 | 1.1E+08 | KD2-H4K8la_peak_4931 | 8.39919  |                                                       |
| 5 | 1.1E+08 | 1.1E+08 | KD2-H4K8la_peak_4932 | 6.64804  | CTC-487M23.8_ENSG00000272869;SRP19_ENSG00000153037    |
| 5 | 1.1E+08 | 1.1E+08 | KD2-H4K8la_peak_4933 | 5.83285  |                                                       |
| 5 | 1.1E+08 | 1.1E+08 | KD2-H4K8la_peak_4934 | 12.14099 | YTHDC2_ENSG00000047188                                |
| 5 | 1.1E+08 | 1.1E+08 | KD2-H4K8la_peak_4935 | 12.1221  |                                                       |
| 5 | 1.1E+08 | 1.1E+08 | KD2-H4K8la_peak_4936 | 6.64804  | FEM1C_ENSG00000145780                                 |
| 5 | 1.2E+08 | 1.2E+08 | KD2-H4K8la_peak_4937 | 6.70626  |                                                       |
| 5 | 1.2E+08 | 1.2E+08 | KD2-H4K8la_peak_4938 | 8.487    |                                                       |
| 5 | 1.3E+08 | 1.3E+08 | KD2-H4K8la_peak_4939 | 8.44557  | PHAX_ENSG00000164902                                  |
| 5 | 1.3E+08 | 1.3E+08 | KD2-H4K8la_peak_4940 | 9.20163  | RP11-434D11.4_ENSG00000251072;LMNB1_ENSG00000113368   |
| 5 | 1.3E+08 | 1.3E+08 | KD2-H4K8la_peak_4941 | 11.36807 |                                                       |
| 5 | 1.3E+08 | 1.3E+08 | KD2-H4K8la_peak_4942 | 6.0136   | ADAMTS19-AS1_ENSG00000249421;ADAMTS19_ENSG00000145808 |
| 5 | 1.3E+08 | 1.3E+08 | KD2-H4K8la_peak_4943 | 5.89088  |                                                       |
| 5 | 1.3E+08 | 1.3E+08 | KD2-H4K8la_peak_4944 | 5.83285  | CTC-432M15.3_ENSG00000273217;FNIP1_ENSG00000217128    |
| 5 | 1.3E+08 | 1.3E+08 | KD2-H4K8la_peak_4945 | 7.49467  |                                                       |
| 5 | 1.3E+08 | 1.3E+08 | KD2-H4K8la_peak_4946 | 7.12014  | C5orf56_ENSG00000197536                               |
| 5 | 1.3E+08 | 1.3E+08 | KD2-H4K8la_peak_4947 | 6.53067  |                                                       |
| 5 | 1.3E+08 | 1.3E+08 | KD2-H4K8la_peak_4948 | 6.26214  |                                                       |
| 5 | 1.3E+08 | 1.3E+08 | KD2-H4K8la_peak_4949 | 7.61975  |                                                       |
| 5 | 1.3E+08 | 1.3E+08 | KD2-H4K8la_peak_4950 | 6.13507  | SHROOM1_ENSG00000164403                               |
| 5 | 1.3E+08 | 1.3E+08 | KD2-H4K8la_peak_4951 | 5.30989  | AFF4_ENSG00000072364;CTC-350I8.1_ENSG00000272023      |
| 5 | 1.3E+08 | 1.3E+08 | KD2-H4K8la_peak_4952 | 13.47548 | AFF4_ENSG00000072364;CTC-350I8.1_ENSG00000272023      |
| 5 | 1.3E+08 | 1.3E+08 | KD2-H4K8la_peak_4953 | 6.25288  | VDAC1_ENSG00000213585;CTB-113I20.2_ENSG00000271737    |
| 5 | 1.3E+08 | 1.3E+08 | KD2-H4K8la_peak_4954 | 12.48213 |                                                       |
| 5 | 1.3E+08 | 1.3E+08 | KD2-H4K8la_peak_4955 | 8.37064  | TCF7_ENSG00000081059                                  |
| 5 | 1.3E+08 | 1.3E+08 | KD2-H4K8la_peak_4956 | 10.47452 | AC005355.2_ENSG00000251169                            |
| 5 | 1.3E+08 | 1.3E+08 | KD2-H4K8la_peak_4957 | 5.43278  | JADE2_ENSG00000043143                                 |
| 5 | 1.3E+08 | 1.3E+08 | KD2-H4K8la_peak_4958 | 4.66279  |                                                       |
| 5 | 1.3E+08 | 1.3E+08 | KD2-H4K8la_peak_4959 | 5.30989  |                                                       |
| 5 | 1.3E+08 | 1.3E+08 | KD2-H4K8la_peak_4960 | 7.13528  | TXNDC15_ENSG00000113621                               |
| 5 | 1.3E+08 | 1.3E+08 | KD2-H4K8la_peak_4961 | 7.92775  | PCBD2_ENSG00000132570                                 |
| 5 | 1.3E+08 | 1.3E+08 | KD2-H4K8la_peak_4962 | 15.30845 | H2AFY_ENSG00000113648;CTC-203F4.2_ENSG00000270021     |
| 5 | 1.4E+08 | 1.4E+08 | KD2-H4K8la_peak_4963 | 10.98662 | SMAD5_ENSG00000113658                                 |
| 5 | 1.4E+08 | 1.4E+08 | KD2-H4K8la_peak_4964 | 7.49467  | HNRNPA0_ENSG00000177733                               |
| 5 | 1.4E+08 | 1.4E+08 | KD2-H4K8la_peak_4965 | 8.77936  | NME5_ENSG00000112981                                  |
| 5 | 1.4E+08 | 1.4E+08 | KD2-H4K8la_peak_4966 | 9.0413   | CDC23_ENSG00000094880                                 |

|   |         |         |                      |          |                                                                   |
|---|---------|---------|----------------------|----------|-------------------------------------------------------------------|
| 5 | 1.4E+08 | 1.4E+08 | KD2-H4K8la_peak_4967 | 4.75945  |                                                                   |
| 5 | 1.4E+08 | 1.4E+08 | KD2-H4K8la_peak_4968 | 14.15376 |                                                                   |
| 5 | 1.4E+08 | 1.4E+08 | KD2-H4K8la_peak_4969 | 10.87112 |                                                                   |
| 5 | 1.4E+08 | 1.4E+08 | KD2-H4K8la_peak_4970 | 5.58883  |                                                                   |
| 5 | 1.4E+08 | 1.4E+08 | KD2-H4K8la_peak_4971 | 7.61975  | HSPA9_ENSG00000113013                                             |
| 5 | 1.4E+08 | 1.4E+08 | KD2-H4K8la_peak_4972 | 8.23729  | CTNNA1_ENSG00000044115                                            |
| 5 | 1.4E+08 | 1.4E+08 | KD2-H4K8la_peak_4973 | 10.74378 | AC034243.1_ENSG00000253404                                        |
| 5 | 1.4E+08 | 1.4E+08 | KD2-H4K8la_peak_4974 | 7.85401  |                                                                   |
| 5 | 1.4E+08 | 1.4E+08 | KD2-H4K8la_peak_4975 | 11.62831 |                                                                   |
| 5 | 1.4E+08 | 1.4E+08 | KD2-H4K8la_peak_4976 | 12.19504 |                                                                   |
| 5 | 1.4E+08 | 1.4E+08 | KD2-H4K8la_peak_4977 | 8.76116  | SIL1_ENSG00000120725                                              |
| 5 | 1.4E+08 | 1.4E+08 | KD2-H4K8la_peak_4978 | 10.02595 |                                                                   |
| 5 | 1.4E+08 | 1.4E+08 | KD2-H4K8la_peak_4979 | 10.02595 |                                                                   |
| 5 | 1.4E+08 | 1.4E+08 | KD2-H4K8la_peak_4980 | 6.18994  |                                                                   |
| 5 | 1.4E+08 | 1.4E+08 | KD2-H4K8la_peak_4981 | 10.8046  |                                                                   |
| 5 | 1.4E+08 | 1.4E+08 | KD2-H4K8la_peak_4982 | 7.3993   |                                                                   |
| 5 | 1.4E+08 | 1.4E+08 | KD2-H4K8la_peak_4983 | 6.14238  |                                                                   |
| 5 | 1.4E+08 | 1.4E+08 | KD2-H4K8la_peak_4984 | 10.25348 |                                                                   |
| 5 | 1.4E+08 | 1.4E+08 | KD2-H4K8la_peak_4985 | 5.83643  |                                                                   |
| 5 | 1.4E+08 | 1.4E+08 | KD2-H4K8la_peak_4986 | 5.36015  | CTB-35F21.3_ENSG00000251387;CTB-35F21.5_ENSG00000271792           |
| 5 | 1.4E+08 | 1.4E+08 | KD2-H4K8la_peak_4987 | 5.83285  | NDUFA2_ENSG00000131495;IK_ENSG00000113141;MIR3655_ENSG00000264052 |
| 5 | 1.4E+08 | 1.4E+08 | KD2-H4K8la_peak_4988 | 13.18631 | PCDHA4_ENSG00000204967                                            |
| 5 | 1.4E+08 | 1.4E+08 | KD2-H4K8la_peak_4989 | 8.39813  | TAF7_ENSG00000178913;AC005618.1_ENSG00000255729                   |
| 5 | 1.4E+08 | 1.4E+08 | KD2-H4K8la_peak_4990 | 5.95337  |                                                                   |
| 5 | 1.4E+08 | 1.4E+08 | KD2-H4K8la_peak_4991 | 10.49982 |                                                                   |
| 5 | 1.4E+08 | 1.4E+08 | KD2-H4K8la_peak_4992 | 10.04111 |                                                                   |
| 5 | 1.4E+08 | 1.4E+08 | KD2-H4K8la_peak_4993 | 6.22733  |                                                                   |
| 5 | 1.4E+08 | 1.4E+08 | KD2-H4K8la_peak_4994 | 7.447    |                                                                   |
| 5 | 1.4E+08 | 1.4E+08 | KD2-H4K8la_peak_4995 | 8.63473  |                                                                   |
| 5 | 1.4E+08 | 1.4E+08 | KD2-H4K8la_peak_4996 | 9.96333  | SPRY4_ENSG00000187678;AC005592.2_ENSG00000231185                  |
| 5 | 1.4E+08 | 1.4E+08 | KD2-H4K8la_peak_4997 | 13.13367 |                                                                   |
| 5 | 1.4E+08 | 1.4E+08 | KD2-H4K8la_peak_4998 | 8.37064  |                                                                   |
| 5 | 1.4E+08 | 1.4E+08 | KD2-H4K8la_peak_4999 | 8.23729  |                                                                   |
| 5 | 1.4E+08 | 1.4E+08 | KD2-H4K8la_peak_5000 | 5.5899   |                                                                   |
| 5 | 1.4E+08 | 1.4E+08 | KD2-H4K8la_peak_5001 | 7.13237  |                                                                   |
| 5 | 1.4E+08 | 1.4E+08 | KD2-H4K8la_peak_5002 | 8.23729  |                                                                   |
| 5 | 1.5E+08 | 1.5E+08 | KD2-H4K8la_peak_5003 | 7.92775  | TCERG1_ENSG00000113649                                            |
| 5 | 1.5E+08 | 1.5E+08 | KD2-H4K8la_peak_5004 | 8.487    | SPINK9_ENSG00000204909                                            |
| 5 | 1.5E+08 | 1.5E+08 | KD2-H4K8la_peak_5005 | 9.27415  |                                                                   |
| 5 | 1.5E+08 | 1.5E+08 | KD2-H4K8la_peak_5006 | 6.89612  |                                                                   |
| 5 | 1.5E+08 | 1.5E+08 | KD2-H4K8la_peak_5007 | 7.77341  |                                                                   |
| 5 | 1.5E+08 | 1.5E+08 | KD2-H4K8la_peak_5008 | 11.15747 |                                                                   |
| 5 | 1.5E+08 | 1.5E+08 | KD2-H4K8la_peak_5009 | 12.49088 | TIGD6_ENSG00000164296;HMGXB3_ENSG00000113716                      |
| 5 | 1.5E+08 | 1.5E+08 | KD2-H4K8la_peak_5010 | 4.75945  |                                                                   |
| 5 | 1.5E+08 | 1.5E+08 | KD2-H4K8la_peak_5011 | 8.07102  |                                                                   |
| 5 | 1.5E+08 | 1.5E+08 | KD2-H4K8la_peak_5012 | 7.61975  | TCOF1_ENSG00000070814                                             |

|   |         |         |                      |          |                                                       |
|---|---------|---------|----------------------|----------|-------------------------------------------------------|
| 5 | 1.5E+08 | 1.5E+08 | KD2-H4K8la_peak_5013 | 7.92775  | CTC-367J11.1_ENSG00000254333;NDST1_ENSG00000070614    |
| 5 | 1.5E+08 | 1.5E+08 | KD2-H4K8la_peak_5014 | 10.28981 |                                                       |
| 5 | 1.5E+08 | 1.5E+08 | KD2-H4K8la_peak_5015 | 6.64804  |                                                       |
| 5 | 1.5E+08 | 1.5E+08 | KD2-H4K8la_peak_5016 | 5.10388  |                                                       |
| 5 | 1.5E+08 | 1.5E+08 | KD2-H4K8la_peak_5017 | 8.24908  |                                                       |
| 5 | 1.5E+08 | 1.5E+08 | KD2-H4K8la_peak_5018 | 7.12014  | SYNPO_ENSG00000171992                                 |
| 5 | 1.5E+08 | 1.5E+08 | KD2-H4K8la_peak_5019 | 12.49088 | CTC-345K18.2_ENSG00000250309                          |
| 5 | 1.5E+08 | 1.5E+08 | KD2-H4K8la_peak_5020 | 15.20987 | G3BP1_ENSG00000145907                                 |
| 5 | 1.5E+08 | 1.5E+08 | KD2-H4K8la_peak_5021 | 6.25288  |                                                       |
| 5 | 1.5E+08 | 1.5E+08 | KD2-H4K8la_peak_5022 | 9.44217  |                                                       |
| 5 | 1.5E+08 | 1.5E+08 | KD2-H4K8la_peak_5023 | 9.88732  |                                                       |
| 5 | 1.5E+08 | 1.5E+08 | KD2-H4K8la_peak_5024 | 10.07942 |                                                       |
| 5 | 1.5E+08 | 1.5E+08 | KD2-H4K8la_peak_5025 | 5.3107   |                                                       |
| 5 | 1.5E+08 | 1.5E+08 | KD2-H4K8la_peak_5026 | 7.23932  |                                                       |
| 5 | 1.5E+08 | 1.5E+08 | KD2-H4K8la_peak_5027 | 10.74378 |                                                       |
| 5 | 1.5E+08 | 1.5E+08 | KD2-H4K8la_peak_5028 | 9.70817  | CNOT8_ENSG00000155508                                 |
| 5 | 1.5E+08 | 1.5E+08 | KD2-H4K8la_peak_5029 | 6.96161  | GEMIN5_ENSG00000082516                                |
| 5 | 1.6E+08 | 1.6E+08 | KD2-H4K8la_peak_5030 | 7.90495  | CTB-109A12.1_ENSG00000251405;NIPAL4_ENSG00000172548   |
| 5 | 1.6E+08 | 1.6E+08 | KD2-H4K8la_peak_5031 | 9.86881  | CLINT1_ENSG00000113282                                |
| 5 | 1.6E+08 | 1.6E+08 | KD2-H4K8la_peak_5032 | 8.39919  | IL12B_ENSG00000113302                                 |
| 5 | 1.6E+08 | 1.6E+08 | KD2-H4K8la_peak_5033 | 6.57319  | Y_RNA_ENSG00000199398;TTC1_ENSG00000113312            |
| 5 | 1.7E+08 | 1.7E+08 | KD2-H4K8la_peak_5034 | 7.49467  |                                                       |
| 5 | 1.7E+08 | 1.7E+08 | KD2-H4K8la_peak_5035 | 7.92775  |                                                       |
| 5 | 1.7E+08 | 1.7E+08 | KD2-H4K8la_peak_5036 | 13.05879 | MIR218-2_ENSG00000207739                              |
| 5 | 1.7E+08 | 1.7E+08 | KD2-H4K8la_peak_5037 | 9.34957  |                                                       |
| 5 | 1.7E+08 | 1.7E+08 | KD2-H4K8la_peak_5038 | 7.78805  |                                                       |
| 5 | 1.7E+08 | 1.7E+08 | KD2-H4K8la_peak_5039 | 5.83285  | TLX3_ENSG00000164438                                  |
| 5 | 1.7E+08 | 1.7E+08 | KD2-H4K8la_peak_5040 | 4.86896  | FBXW11_ENSG00000072803                                |
| 5 | 1.7E+08 | 1.7E+08 | KD2-H4K8la_peak_5041 | 5.36015  |                                                       |
| 5 | 1.7E+08 | 1.7E+08 | KD2-H4K8la_peak_5042 | 11.24937 | DUSP1_ENSG00000120129                                 |
| 5 | 1.7E+08 | 1.7E+08 | KD2-H4K8la_peak_5043 | 7.22716  | CTC-308K20.1_ENSG00000204758;RPL26L1_ENSG00000037241  |
| 5 | 1.7E+08 | 1.7E+08 | KD2-H4K8la_peak_5044 | 8.50453  | CTC-308K20.1_ENSG00000204758;RPL26L1_ENSG00000037241  |
| 5 | 1.7E+08 | 1.7E+08 | KD2-H4K8la_peak_5045 | 7.12014  | BNIP1_ENSG00000113734;CTC-209H22.3_ENSG00000253172    |
| 5 | 1.7E+08 | 1.7E+08 | KD2-H4K8la_peak_5046 | 8.39919  | STC2_ENSG00000113739                                  |
| 5 | 1.7E+08 | 1.7E+08 | KD2-H4K8la_peak_5047 | 9.73848  | STC2_ENSG00000113739                                  |
| 5 | 1.7E+08 | 1.7E+08 | KD2-H4K8la_peak_5048 | 8.19799  |                                                       |
| 5 | 1.7E+08 | 1.7E+08 | KD2-H4K8la_peak_5049 | 4.53273  |                                                       |
| 5 | 1.7E+08 | 1.7E+08 | KD2-H4K8la_peak_5050 | 9.38376  | CTD-2532K18.1_ENSG00000251670;MIR4634_ENSG00000266890 |
| 5 | 1.7E+08 | 1.7E+08 | KD2-H4K8la_peak_5051 | 6.64804  |                                                       |
| 5 | 1.8E+08 | 1.8E+08 | KD2-H4K8la_peak_5052 | 8.76116  |                                                       |
| 5 | 1.8E+08 | 1.8E+08 | KD2-H4K8la_peak_5053 | 7.22389  | CDHR2_ENSG00000074276                                 |
| 5 | 1.8E+08 | 1.8E+08 | KD2-H4K8la_peak_5054 | 9.0413   |                                                       |
| 5 | 1.8E+08 | 1.8E+08 | KD2-H4K8la_peak_5055 | 7.92775  | TSPAN17_ENSG00000048140                               |
| 5 | 1.8E+08 | 1.8E+08 | KD2-H4K8la_peak_5056 | 5.83285  | TSPAN17_ENSG00000048140                               |
| 5 | 1.8E+08 | 1.8E+08 | KD2-H4K8la_peak_5057 | 10.99007 |                                                       |
| 5 | 1.8E+08 | 1.8E+08 | KD2-H4K8la_peak_5058 | 8.37064  |                                                       |

|   |         |         |                      |          |                                                     |
|---|---------|---------|----------------------|----------|-----------------------------------------------------|
| 5 | 1.8E+08 | 1.8E+08 | KD2-H4K8la_peak_5059 | 6.64804  |                                                     |
| 5 | 1.8E+08 | 1.8E+08 | KD2-H4K8la_peak_5060 | 5.23773  |                                                     |
| 5 | 1.8E+08 | 1.8E+08 | KD2-H4K8la_peak_5061 | 10.44868 | NSD1_ENSG00000165671                                |
| 5 | 1.8E+08 | 1.8E+08 | KD2-H4K8la_peak_5062 | 8.37064  |                                                     |
| 5 | 1.8E+08 | 1.8E+08 | KD2-H4K8la_peak_5063 | 6.21394  |                                                     |
| 5 | 1.8E+08 | 1.8E+08 | KD2-H4K8la_peak_5064 | 9.61894  |                                                     |
| 5 | 1.8E+08 | 1.8E+08 | KD2-H4K8la_peak_5065 | 12.14568 | GRK6_ENSG00000198055                                |
| 5 | 1.8E+08 | 1.8E+08 | KD2-H4K8la_peak_5066 | 9.66714  | DBN1_ENSG00000113758                                |
| 5 | 1.8E+08 | 1.8E+08 | KD2-H4K8la_peak_5067 | 7.12014  | B4GALT7_ENSG00000027847                             |
| 5 | 1.8E+08 | 1.8E+08 | KD2-H4K8la_peak_5068 | 5.99671  |                                                     |
| 5 | 1.8E+08 | 1.8E+08 | KD2-H4K8la_peak_5069 | 5.43278  | HNRNPAB_ENSG00000197451                             |
| 5 | 1.8E+08 | 1.8E+08 | KD2-H4K8la_peak_5070 | 11.06859 | PHYKPL_ENSG00000175309                              |
| 5 | 1.8E+08 | 1.8E+08 | KD2-H4K8la_peak_5071 | 8.24908  |                                                     |
| 5 | 1.8E+08 | 1.8E+08 | KD2-H4K8la_peak_5072 | 7.72421  | ZNF354C_ENSG00000177932                             |
| 5 | 1.8E+08 | 1.8E+08 | KD2-H4K8la_peak_5073 | 4.86896  |                                                     |
| 5 | 1.8E+08 | 1.8E+08 | KD2-H4K8la_peak_5074 | 6.89612  |                                                     |
| 5 | 1.8E+08 | 1.8E+08 | KD2-H4K8la_peak_5075 | 6.20793  |                                                     |
| 5 | 1.8E+08 | 1.8E+08 | KD2-H4K8la_peak_5076 | 15.58875 |                                                     |
| 5 | 1.8E+08 | 1.8E+08 | KD2-H4K8la_peak_5077 | 11.40266 | CANX_ENSG00000127022;HMGB3P22_ENSG00000225051       |
| 5 | 1.8E+08 | 1.8E+08 | KD2-H4K8la_peak_5078 | 10.06702 |                                                     |
| 5 | 1.8E+08 | 1.8E+08 | KD2-H4K8la_peak_5079 | 7.49467  | CTC-241N9.1_ENSG00000245317                         |
| 5 | 1.8E+08 | 1.8E+08 | KD2-H4K8la_peak_5080 | 8.07102  | MAPK9_ENSG00000050748;CTB-129O4.1_ENSG00000248367   |
| 5 | 1.8E+08 | 1.8E+08 | KD2-H4K8la_peak_5081 | 9.6708   |                                                     |
| 5 | 1.8E+08 | 1.8E+08 | KD2-H4K8la_peak_5082 | 8.07102  | ZFP62_ENSG00000196670                               |
| 5 | 1.8E+08 | 1.8E+08 | KD2-H4K8la_peak_5083 | 6.2278   | ZFP62_ENSG00000196670                               |
| 5 | 1.8E+08 | 1.8E+08 | KD2-H4K8la_peak_5084 | 8.16787  |                                                     |
| 5 | 1.8E+08 | 1.8E+08 | KD2-H4K8la_peak_5085 | 6.86458  | CTC-338M12.4_ENSG00000233937                        |
| 5 | 1.8E+08 | 1.8E+08 | KD2-H4K8la_peak_5086 | 8.07044  | TRIM52_ENSG00000183718;TRIM52-AS1_ENSG00000248275   |
| 6 | 291679  | 291945  | KD2-H4K8la_peak_5087 | 9.70817  | DUSP22_ENSG00000112679                              |
| 6 | 1614191 | 1614400 | KD2-H4K8la_peak_5088 | 7.65547  |                                                     |
| 6 | 1838022 | 1838294 | KD2-H4K8la_peak_5089 | 7.60756  |                                                     |
| 6 | 1904891 | 1905183 | KD2-H4K8la_peak_5090 | 8.73956  |                                                     |
| 6 | 2634394 | 2634659 | KD2-H4K8la_peak_5091 | 9.9701   | C6orf195_ENSG00000164385                            |
| 6 | 2841802 | 2842106 | KD2-H4K8la_peak_5092 | 5.98303  | SERPINB1_ENSG00000021355                            |
| 6 | 2971156 | 2971589 | KD2-H4K8la_peak_5093 | 7.92775  | SERPINB6_ENSG00000124570                            |
| 6 | 2988402 | 2988656 | KD2-H4K8la_peak_5094 | 5.7631   | LINC01011_ENSG00000244041;NQO2_ENSG00000124588      |
| 6 | 3000243 | 3000594 | KD2-H4K8la_peak_5095 | 4.53273  | RP1-90J20.8_ENSG00000224846                         |
| 6 | 3053680 | 3053958 | KD2-H4K8la_peak_5096 | 10.20357 |                                                     |
| 6 | 3157982 | 3158309 | KD2-H4K8la_peak_5097 | 15.74238 | TUBB2A_ENSG00000137267                              |
| 6 | 3228316 | 3228616 | KD2-H4K8la_peak_5098 | 7.23932  |                                                     |
| 6 | 3229402 | 3229782 | KD2-H4K8la_peak_5099 | 8.24908  |                                                     |
| 6 | 3231558 | 3231839 | KD2-H4K8la_peak_5100 | 12.13455 | TUBB2B_ENSG00000137285;PSMG4_ENSG00000180822        |
| 6 | 4020640 | 4020850 | KD2-H4K8la_peak_5101 | 8.23939  | RP3-406P24.3_ENSG00000230648;PRPF4B_ENSG00000112739 |
| 6 | 5004424 | 5004837 | KD2-H4K8la_peak_5102 | 9.86881  | RPP40_ENSG00000124787                               |
| 6 | 5747356 | 5747585 | KD2-H4K8la_peak_5103 | 8.40055  |                                                     |
| 6 | 7052710 | 7052923 | KD2-H4K8la_peak_5104 | 7.72421  |                                                     |

|   |         |         |                      |          |                                                                    |
|---|---------|---------|----------------------|----------|--------------------------------------------------------------------|
| 6 | 8435972 | 8436180 | KD2-H4K8la_peak_5105 | 7.72421  | SLC35B3_ENSG00000124786                                            |
| 6 | 1E+07   | 1E+07   | KD2-H4K8la_peak_5106 | 11.50321 |                                                                    |
| 6 | 1.1E+07 | 1.1E+07 | KD2-H4K8la_peak_5107 | 7.49467  |                                                                    |
| 6 | 1.1E+07 | 1.1E+07 | KD2-H4K8la_peak_5108 | 7.13237  | ELOVL2_ENSG00000197977;ELOVL2-AS1_ENSG00000230314                  |
| 6 | 1.2E+07 | 1.2E+07 | KD2-H4K8la_peak_5109 | 8.76082  | TMEM170B_ENSG00000205269                                           |
| 6 | 1.4E+07 | 1.4E+07 | KD2-H4K8la_peak_5110 | 6.61963  |                                                                    |
| 6 | 1.4E+07 | 1.4E+07 | KD2-H4K8la_peak_5111 | 8.39919  |                                                                    |
| 6 | 1.7E+07 | 1.7E+07 | KD2-H4K8la_peak_5112 | 5.7631   | ATXN1_ENSG00000124788;RP1-151F17.1_ENSG00000229931                 |
| 6 | 1.7E+07 | 1.7E+07 | KD2-H4K8la_peak_5113 | 7.72421  | RBM24_ENSG00000112183                                              |
| 6 | 1.8E+07 | 1.8E+07 | KD2-H4K8la_peak_5114 | 6.64804  | KIF13A_ENSG00000137177                                             |
| 6 | 2E+07   | 2E+07   | KD2-H4K8la_peak_5115 | 9.90319  | MBOAT1_ENSG00000172197;RP11-239H6.2_ENSG00000227803                |
| 6 | 2E+07   | 2E+07   | KD2-H4K8la_peak_5116 | 7.3993   | E2F3_ENSG00000112242                                               |
| 6 | 2.2E+07 | 2.2E+07 | KD2-H4K8la_peak_5117 | 5.58883  |                                                                    |
| 6 | 2.2E+07 | 2.2E+07 | KD2-H4K8la_peak_5118 | 5.36015  | CASC14_ENSG00000260455                                             |
| 6 | 2.3E+07 | 2.3E+07 | KD2-H4K8la_peak_5119 | 7.23116  |                                                                    |
| 6 | 2.4E+07 | 2.4E+07 | KD2-H4K8la_peak_5120 | 6.2278   | MRS2_ENSG00000124532                                               |
| 6 | 2.5E+07 | 2.5E+07 | KD2-H4K8la_peak_5121 | 6.2278   | GMNN_ENSG00000112312                                               |
| 6 | 2.7E+07 | 2.7E+07 | KD2-H4K8la_peak_5122 | 10.00612 | TRNAI2_ENSG00000238621                                             |
| 6 | 2.8E+07 | 2.8E+07 | KD2-H4K8la_peak_5123 | 7.4908   |                                                                    |
| 6 | 2.8E+07 | 2.8E+07 | KD2-H4K8la_peak_5124 | 11.97807 | ZSCAN16-AS1_ENSG00000269293;RP1-265C24.8_ENSG00000261839           |
| 6 | 2.8E+07 | 2.8E+07 | KD2-H4K8la_peak_5125 | 10.34978 |                                                                    |
| 6 | 2.8E+07 | 2.8E+07 | KD2-H4K8la_peak_5126 | 9.72904  |                                                                    |
| 6 | 2.9E+07 | 2.9E+07 | KD2-H4K8la_peak_5127 | 8.52281  |                                                                    |
| 6 | 2.9E+07 | 2.9E+07 | KD2-H4K8la_peak_5128 | 5.67596  | RP5-1186N24.3_ENSG00000246350                                      |
| 6 | 2.9E+07 | 2.9E+07 | KD2-H4K8la_peak_5129 | 6.70626  |                                                                    |
| 6 | 3E+07   | 3E+07   | KD2-H4K8la_peak_5130 | 11.06859 |                                                                    |
| 6 | 3E+07   | 3E+07   | KD2-H4K8la_peak_5131 | 12.01611 | HLA-L_ENSG00000243753                                              |
| 6 | 3E+07   | 3E+07   | KD2-H4K8la_peak_5132 | 6.98778  | HCG17_ENSG00000270604;HCG18_ENSG00000231074;TRIM39_ENSG00000204599 |
| 6 | 3E+07   | 3E+07   | KD2-H4K8la_peak_5133 | 5.16795  | XXbac-BPG249D20.9_ENSG00000235781                                  |
| 6 | 3.1E+07 | 3.1E+07 | KD2-H4K8la_peak_5134 | 10.11868 | PPP1R18_ENSG00000146112                                            |
| 6 | 3.1E+07 | 3.1E+07 | KD2-H4K8la_peak_5135 | 9.48768  | TUBB_ENSG00000196230                                               |
| 6 | 3.1E+07 | 3.1E+07 | KD2-H4K8la_peak_5136 | 5.38451  |                                                                    |
| 6 | 3.1E+07 | 3.1E+07 | KD2-H4K8la_peak_5137 | 6.64804  |                                                                    |
| 6 | 3.1E+07 | 3.1E+07 | KD2-H4K8la_peak_5138 | 7.81267  |                                                                    |
| 6 | 3.2E+07 | 3.2E+07 | KD2-H4K8la_peak_5139 | 6.61963  |                                                                    |
| 6 | 3.2E+07 | 3.2E+07 | KD2-H4K8la_peak_5140 | 8.89364  |                                                                    |
| 6 | 3.2E+07 | 3.2E+07 | KD2-H4K8la_peak_5141 | 5.84082  | VAR5_ENSG00000204394                                               |
| 6 | 3.2E+07 | 3.2E+07 | KD2-H4K8la_peak_5142 | 11.77509 | EHMT2_ENSG00000204371;C2_ENSG00000166278                           |
| 6 | 3.2E+07 | 3.2E+07 | KD2-H4K8la_peak_5143 | 8.59735  | ZBTB12_ENSG00000204366                                             |
| 6 | 3.2E+07 | 3.2E+07 | KD2-H4K8la_peak_5144 | 8.13727  | FKBPL_ENSG00000204315                                              |
| 6 | 3.2E+07 | 3.2E+07 | KD2-H4K8la_peak_5145 | 9.0413   |                                                                    |
| 6 | 3.2E+07 | 3.2E+07 | KD2-H4K8la_peak_5146 | 9.06396  | GPSM3_ENSG00000213654                                              |
| 6 | 3.3E+07 | 3.3E+07 | KD2-H4K8la_peak_5147 | 8.12466  | HLA-DMA_ENSG00000204257;BRD2_ENSG00000204256                       |
| 6 | 3.3E+07 | 3.3E+07 | KD2-H4K8la_peak_5148 | 9.92519  | BRD2-IT1_ENSG00000223837                                           |
| 6 | 3.3E+07 | 3.3E+07 | KD2-H4K8la_peak_5149 | 6.61495  |                                                                    |
| 6 | 3.4E+07 | 3.4E+07 | KD2-H4K8la_peak_5150 | 7.94013  | LEMD2_ENSG00000161904                                              |



|   |         |         |                      |          |                                                        |
|---|---------|---------|----------------------|----------|--------------------------------------------------------|
| 6 | 3.4E+07 | 3.4E+07 | KD2-H4K8la_peak_5151 | 9.6708   |                                                        |
| 6 | 3.4E+07 | 3.4E+07 | KD2-H4K8la_peak_5152 | 7.92775  | HMGA1_ENSG00000137309                                  |
| 6 | 3.4E+07 | 3.4E+07 | KD2-H4K8la_peak_5153 | 12.63515 | RPS10-NUDT3_ENSG00000270800;RPS10_ENSG00000124614      |
| 6 | 3.5E+07 | 3.5E+07 | KD2-H4K8la_peak_5154 | 7.13237  | C6orf106_ENSG00000196821;RP11-140K17.3_ENSG00000272288 |
| 6 | 3.5E+07 | 3.5E+07 | KD2-H4K8la_peak_5155 | 8.04432  | SNRPC_ENSG00000124562                                  |
| 6 | 3.5E+07 | 3.5E+07 | KD2-H4K8la_peak_5156 | 7.12014  | SNRPC_ENSG00000124562                                  |
| 6 | 3.5E+07 | 3.5E+07 | KD2-H4K8la_peak_5157 | 7.12497  | UHRF1BP1_ENSG00000065060                               |
| 6 | 3.5E+07 | 3.5E+07 | KD2-H4K8la_peak_5158 | 8.12466  | TAF11_ENSG00000064995;ANKS1A_ENSG00000064999           |
| 6 | 3.5E+07 | 3.5E+07 | KD2-H4K8la_peak_5159 | 8.37064  | RPL10A_ENSG00000198755                                 |
| 6 | 3.5E+07 | 3.5E+07 | KD2-H4K8la_peak_5160 | 8.94987  | TEAD3_ENSG00000007866                                  |
| 6 | 3.6E+07 | 3.6E+07 | KD2-H4K8la_peak_5161 | 9.10568  | FKBP5_ENSG00000096060                                  |
| 6 | 3.6E+07 | 3.6E+07 | KD2-H4K8la_peak_5162 | 8.49617  | RP3-510O8.4_ENSG00000232909;ARMC12_ENSG00000157343     |
| 6 | 3.6E+07 | 3.6E+07 | KD2-H4K8la_peak_5163 | 8.37064  | MAPK14_ENSG00000112062                                 |
| 6 | 3.6E+07 | 3.6E+07 | KD2-H4K8la_peak_5164 | 8.24908  |                                                        |
| 6 | 3.6E+07 | 3.6E+07 | KD2-H4K8la_peak_5165 | 11.52725 | RP1-179N16.6_ENSG00000246982;BRPF3_ENSG00000096070     |
| 6 | 3.6E+07 | 3.6E+07 | KD2-H4K8la_peak_5166 | 6.11881  |                                                        |
| 6 | 3.7E+07 | 3.7E+07 | KD2-H4K8la_peak_5167 | 8.4393   |                                                        |
| 6 | 3.7E+07 | 3.7E+07 | KD2-H4K8la_peak_5168 | 6.64804  | CMTR1_ENSG00000137200                                  |
| 6 | 3.8E+07 | 3.8E+07 | KD2-H4K8la_peak_5169 | 6.96161  |                                                        |
| 6 | 3.8E+07 | 3.8E+07 | KD2-H4K8la_peak_5170 | 7.28641  |                                                        |
| 6 | 3.9E+07 | 3.9E+07 | KD2-H4K8la_peak_5171 | 14.09097 |                                                        |
| 6 | 3.9E+07 | 3.9E+07 | KD2-H4K8la_peak_5172 | 13.5227  |                                                        |
| 6 | 3.9E+07 | 3.9E+07 | KD2-H4K8la_peak_5173 | 6.64804  |                                                        |
| 6 | 4E+07   | 4E+07   | KD2-H4K8la_peak_5174 | 16.08919 | KIF6_ENSG00000164627                                   |
| 6 | 4E+07   | 4E+07   | KD2-H4K8la_peak_5175 | 12.12133 |                                                        |
| 6 | 4E+07   | 4E+07   | KD2-H4K8la_peak_5176 | 7.49467  |                                                        |
| 6 | 4E+07   | 4E+07   | KD2-H4K8la_peak_5177 | 6.2278   |                                                        |
| 6 | 4E+07   | 4E+07   | KD2-H4K8la_peak_5178 | 7.56395  |                                                        |
| 6 | 4E+07   | 4E+07   | KD2-H4K8la_peak_5179 | 8.07102  |                                                        |
| 6 | 4.1E+07 | 4.1E+07 | KD2-H4K8la_peak_5180 | 6.86458  |                                                        |
| 6 | 4.1E+07 | 4.1E+07 | KD2-H4K8la_peak_5181 | 9.27415  |                                                        |
| 6 | 4.1E+07 | 4.1E+07 | KD2-H4K8la_peak_5182 | 6.68593  | NFYA_ENSG00000001167                                   |
| 6 | 4.1E+07 | 4.1E+07 | KD2-H4K8la_peak_5183 | 8.07102  |                                                        |
| 6 | 4.2E+07 | 4.2E+07 | KD2-H4K8la_peak_5184 | 5.58883  | TFEB_ENSG00000112561                                   |
| 6 | 4.2E+07 | 4.2E+07 | KD2-H4K8la_peak_5185 | 4.7338   |                                                        |
| 6 | 4.2E+07 | 4.2E+07 | KD2-H4K8la_peak_5186 | 4.30663  |                                                        |
| 6 | 4.2E+07 | 4.2E+07 | KD2-H4K8la_peak_5187 | 10.28981 |                                                        |
| 6 | 4.2E+07 | 4.2E+07 | KD2-H4K8la_peak_5188 | 11.06787 | C6orf132_ENSG00000188112                               |
| 6 | 4.2E+07 | 4.2E+07 | KD2-H4K8la_peak_5189 | 7.49467  | MRPS10_ENSG00000048544                                 |
| 6 | 4.3E+07 | 4.3E+07 | KD2-H4K8la_peak_5190 | 20.8834  |                                                        |
| 6 | 4.3E+07 | 4.3E+07 | KD2-H4K8la_peak_5191 | 13.01988 |                                                        |
| 6 | 4.3E+07 | 4.3E+07 | KD2-H4K8la_peak_5192 | 11.69149 | RPL7L1_ENSG00000146223                                 |
| 6 | 4.3E+07 | 4.3E+07 | KD2-H4K8la_peak_5193 | 9.61894  | CUL7_ENSG00000044090                                   |
| 6 | 4.3E+07 | 4.3E+07 | KD2-H4K8la_peak_5194 | 5.99671  |                                                        |
| 6 | 4.3E+07 | 4.3E+07 | KD2-H4K8la_peak_5195 | 8.07044  | DNPH1_ENSG00000112667                                  |
| 6 | 4.3E+07 | 4.3E+07 | KD2-H4K8la_peak_5196 | 7.61406  | ZNF318_ENSG00000171467                                 |

|   |         |         |                      |          |                                                                                        |
|---|---------|---------|----------------------|----------|----------------------------------------------------------------------------------------|
| 6 | 4.3E+07 | 4.3E+07 | KD2-H4K8la_peak_5197 | 5.58883  | ABCC10_ENSG00000124574                                                                 |
| 6 | 4.3E+07 | 4.3E+07 | KD2-H4K8la_peak_5198 | 9.0516   | ABCC10_ENSG00000124574                                                                 |
| 6 | 4.4E+07 | 4.4E+07 | KD2-H4K8la_peak_5199 | 7.49467  |                                                                                        |
| 6 | 4.4E+07 | 4.4E+07 | KD2-H4K8la_peak_5200 | 7.3993   |                                                                                        |
| 6 | 4.4E+07 | 4.4E+07 | KD2-H4K8la_peak_5201 | 5.05146  |                                                                                        |
| 6 | 4.4E+07 | 4.4E+07 | KD2-H4K8la_peak_5202 | 15.92725 |                                                                                        |
| 6 | 4.4E+07 | 4.4E+07 | KD2-H4K8la_peak_5203 | 6.04152  | RP5-1120P11.1_ENSG00000237686;RP5-1120P11.3_ENSG00000231881                            |
| 6 | 4.4E+07 | 4.4E+07 | KD2-H4K8la_peak_5204 | 6.49887  |                                                                                        |
| 6 | 4.4E+07 | 4.4E+07 | KD2-H4K8la_peak_5205 | 10.98512 | HSP90AB1_ENSG00000096384                                                               |
| 6 | 4.4E+07 | 4.4E+07 | KD2-H4K8la_peak_5206 | 8.76116  | TCTE1_ENSG00000146221                                                                  |
| 6 | 4.4E+07 | 4.4E+07 | KD2-H4K8la_peak_5207 | 8.07102  | SPATS1_ENSG00000249481                                                                 |
| 6 | 4.4E+07 | 4.4E+07 | KD2-H4K8la_peak_5208 | 7.92775  | CDC5L_ENSG00000096401                                                                  |
| 6 | 4.7E+07 | 4.7E+07 | KD2-H4K8la_peak_5209 | 11.15747 | RP11-385F7.1_ENSG00000270761;CD2AP_ENSG00000198087                                     |
| 6 | 5.1E+07 | 5.1E+07 | KD2-H4K8la_peak_5210 | 16.12381 | TFAP2B_ENSG00000008196                                                                 |
| 6 | 5.1E+07 | 5.1E+07 | KD2-H4K8la_peak_5211 | 7.65547  |                                                                                        |
| 6 | 5.2E+07 | 5.2E+07 | KD2-H4K8la_peak_5212 | 5.67034  |                                                                                        |
| 6 | 5.2E+07 | 5.2E+07 | KD2-H4K8la_peak_5213 | 8.37064  |                                                                                        |
| 6 | 5.2E+07 | 5.2E+07 | KD2-H4K8la_peak_5214 | 8.37064  | TRAM2_ENSG00000065308;TRAM2-AS1_ENSG00000225791                                        |
| 6 | 5.4E+07 | 5.4E+07 | KD2-H4K8la_peak_5215 | 4.30663  | RP13-476E20.1_ENSG00000228614;LRRC1_ENSG00000137269                                    |
| 6 | 5.4E+07 | 5.4E+07 | KD2-H4K8la_peak_5216 | 6.0136   | RP13-476E20.1_ENSG00000228614;LRRC1_ENSG00000137269                                    |
| 6 | 7.1E+07 | 7.1E+07 | KD2-H4K8la_peak_5217 | 6.2278   | LMBRD1_ENSG00000168216                                                                 |
| 6 | 7.1E+07 | 7.1E+07 | KD2-H4K8la_peak_5218 | 8.76116  | RP11-462G2.2_ENSG00000224349;FAM135A_ENSG00000082269                                   |
| 6 | 7.4E+07 | 7.4E+07 | KD2-H4K8la_peak_5219 | 9.0413   | AC019205.1_ENSG00000263378;RP11-257K9.8_ENSG00000243501;RP11-398K22.12_ENSG00000229852 |
| 6 | 7.4E+07 | 7.4E+07 | KD2-H4K8la_peak_5220 | 4.75945  |                                                                                        |
| 6 | 7.4E+07 | 7.4E+07 | KD2-H4K8la_peak_5221 | 5.51108  |                                                                                        |
| 6 | 7.6E+07 | 7.6E+07 | KD2-H4K8la_peak_5222 | 4.53273  |                                                                                        |
| 6 | 7.9E+07 | 7.9E+07 | KD2-H4K8la_peak_5223 | 5.83285  |                                                                                        |
| 6 | 8.4E+07 | 8.4E+07 | KD2-H4K8la_peak_5224 | 11.40266 | ME1_ENSG00000065833                                                                    |
| 6 | 8.6E+07 | 8.6E+07 | KD2-H4K8la_peak_5225 | 8.76116  |                                                                                        |
| 6 | 8.6E+07 | 8.6E+07 | KD2-H4K8la_peak_5226 | 7.13237  | SYNCRIP_ENSG00000135316                                                                |
| 6 | 8.8E+07 | 8.8E+07 | KD2-H4K8la_peak_5227 | 11.06859 | SMIM8_ENSG0000011850;RP1-102H19.8_ENSG00000226524                                      |
| 6 | 9E+07   | 9E+07   | KD2-H4K8la_peak_5228 | 6.47589  | UBE2J1_ENSG00000198833                                                                 |
| 6 | 9.1E+07 | 9.1E+07 | KD2-H4K8la_peak_5229 | 4.86896  | CASP8AP2_ENSG00000118412                                                               |
| 6 | 9.1E+07 | 9.1E+07 | KD2-H4K8la_peak_5230 | 5.72892  |                                                                                        |
| 6 | 9.6E+07 | 9.6E+07 | KD2-H4K8la_peak_5231 | 12.1221  | MANEA-AS1_ENSG00000261366;MANEA_ENSG00000172469                                        |
| 6 | 9.7E+07 | 9.7E+07 | KD2-H4K8la_peak_5232 | 6.88801  | GPR63_ENSG00000112218                                                                  |
| 6 | 9.9E+07 | 9.9E+07 | KD2-H4K8la_peak_5233 | 8.07102  | FBXL4_ENSG00000112234                                                                  |
| 6 | 1E+08   | 1E+08   | KD2-H4K8la_peak_5234 | 6.0136   | FAXC_ENSG00000146267                                                                   |
| 6 | 1E+08   | 1E+08   | KD2-H4K8la_peak_5235 | 8.487    | CCNC_ENSG00000112237                                                                   |
| 6 | 1E+08   | 1E+08   | KD2-H4K8la_peak_5236 | 6.60114  |                                                                                        |
| 6 | 1.1E+08 | 1.1E+08 | KD2-H4K8la_peak_5237 | 8.37064  | LINC00577_ENSG00000203809                                                              |
| 6 | 1.1E+08 | 1.1E+08 | KD2-H4K8la_peak_5238 | 6.26214  | RP11-404H14.1_ENSG00000233941                                                          |
| 6 | 1.1E+08 | 1.1E+08 | KD2-H4K8la_peak_5239 | 7.0396   | PDSS2_ENSG00000164494                                                                  |
| 6 | 1.1E+08 | 1.1E+08 | KD2-H4K8la_peak_5240 | 4.86896  |                                                                                        |
| 6 | 1.1E+08 | 1.1E+08 | KD2-H4K8la_peak_5241 | 8.34387  | SNX3_ENSG00000112335                                                                   |
| 6 | 1.1E+08 | 1.1E+08 | KD2-H4K8la_peak_5242 | 7.12014  |                                                                                        |

|   |         |         |                      |          |                                                                      |
|---|---------|---------|----------------------|----------|----------------------------------------------------------------------|
| 6 | 1.1E+08 | 1.1E+08 | KD2-H4K8la_peak_5243 | 7.61975  |                                                                      |
| 6 | 1.1E+08 | 1.1E+08 | KD2-H4K8la_peak_5244 | 5.58883  | METTL24_ENSG00000053328                                              |
| 6 | 1.1E+08 | 1.1E+08 | KD2-H4K8la_peak_5245 | 9.38376  | METTL24_ENSG00000053328                                              |
| 6 | 1.1E+08 | 1.1E+08 | KD2-H4K8la_peak_5246 | 10.65691 | GTF3C6_ENSG00000155115                                               |
| 6 | 1.1E+08 | 1.1E+08 | KD2-H4K8la_peak_5247 | 6.16656  |                                                                      |
| 6 | 1.1E+08 | 1.1E+08 | KD2-H4K8la_peak_5248 | 5.63532  |                                                                      |
| 6 | 1.1E+08 | 1.1E+08 | KD2-H4K8la_peak_5249 | 6.70626  |                                                                      |
| 6 | 1.1E+08 | 1.1E+08 | KD2-H4K8la_peak_5250 | 11.15747 | MARCKS_ENSG00000155130                                               |
| 6 | 1.2E+08 | 1.2E+08 | KD2-H4K8la_peak_5251 | 8.07102  | KPNA5_ENSG00000196911                                                |
| 6 | 1.2E+08 | 1.2E+08 | KD2-H4K8la_peak_5252 | 7.23116  | GOPC_ENSG00000047932                                                 |
| 6 | 1.2E+08 | 1.2E+08 | KD2-H4K8la_peak_5253 | 5.19328  |                                                                      |
| 6 | 1.3E+08 | 1.3E+08 | KD2-H4K8la_peak_5254 | 6.86458  |                                                                      |
| 6 | 1.3E+08 | 1.3E+08 | KD2-H4K8la_peak_5255 | 9.20163  | TRMT11_ENSG00000066651                                               |
| 6 | 1.3E+08 | 1.3E+08 | KD2-H4K8la_peak_5256 | 8.07102  | SOGA3_ENSG00000214338;SOGA3_ENSG00000255330;C6orf58_ENSG00000184530  |
| 6 | 1.4E+08 | 1.4E+08 | KD2-H4K8la_peak_5257 | 7.12014  | SLC35D3_ENSG00000182747                                              |
| 6 | 1.4E+08 | 1.4E+08 | KD2-H4K8la_peak_5258 | 14.33193 |                                                                      |
| 6 | 1.4E+08 | 1.4E+08 | KD2-H4K8la_peak_5259 | 9.0413   |                                                                      |
| 6 | 1.4E+08 | 1.4E+08 | KD2-H4K8la_peak_5260 | 12.58104 |                                                                      |
| 6 | 1.4E+08 | 1.4E+08 | KD2-H4K8la_peak_5261 | 10.04111 |                                                                      |
| 6 | 1.4E+08 | 1.4E+08 | KD2-H4K8la_peak_5262 | 5.30989  |                                                                      |
| 6 | 1.4E+08 | 1.4E+08 | KD2-H4K8la_peak_5263 | 5.99671  |                                                                      |
| 6 | 1.4E+08 | 1.4E+08 | KD2-H4K8la_peak_5264 | 7.72421  |                                                                      |
| 6 | 1.4E+08 | 1.4E+08 | KD2-H4K8la_peak_5265 | 15.37939 | IL20RA_ENSG00000016402                                               |
| 6 | 1.4E+08 | 1.4E+08 | KD2-H4K8la_peak_5266 | 5.43278  | REPS1_ENSG00000135597                                                |
| 6 | 1.4E+08 | 1.4E+08 | KD2-H4K8la_peak_5267 | 4.53273  | ADAT2_ENSG00000189007;RNA5SP221_ENSG00000223203;PEX3_ENSG00000034693 |
| 6 | 1.4E+08 | 1.4E+08 | KD2-H4K8la_peak_5268 | 12.14099 | FUCA2_ENSG00000001036                                                |
| 6 | 1.4E+08 | 1.4E+08 | KD2-H4K8la_peak_5269 | 7.51014  | PHACTR2_ENSG00000112419                                              |
| 6 | 1.4E+08 | 1.4E+08 | KD2-H4K8la_peak_5270 | 8.78735  | LTV1_ENSG00000135521                                                 |
| 6 | 1.4E+08 | 1.4E+08 | KD2-H4K8la_peak_5271 | 10.83873 |                                                                      |
| 6 | 1.4E+08 | 1.4E+08 | KD2-H4K8la_peak_5272 | 7.49467  | SF3B5_ENSG00000169976                                                |
| 6 | 1.5E+08 | 1.5E+08 | KD2-H4K8la_peak_5273 | 7.83588  | EPM2A_ENSG00000112425;RP3-466P17.1_ENSG00000270638                   |
| 6 | 1.5E+08 | 1.5E+08 | KD2-H4K8la_peak_5274 | 10.74378 |                                                                      |
| 6 | 1.5E+08 | 1.5E+08 | KD2-H4K8la_peak_5275 | 4.75945  | PPIL4_ENSG00000131013                                                |
| 6 | 1.5E+08 | 1.5E+08 | KD2-H4K8la_peak_5276 | 10.49982 | LATS1_ENSG00000131023                                                |
| 6 | 1.5E+08 | 1.5E+08 | KD2-H4K8la_peak_5277 | 5.67596  |                                                                      |
| 6 | 1.5E+08 | 1.5E+08 | KD2-H4K8la_peak_5278 | 8.37064  |                                                                      |
| 6 | 1.5E+08 | 1.5E+08 | KD2-H4K8la_peak_5279 | 8.37064  |                                                                      |
| 6 | 1.5E+08 | 1.5E+08 | KD2-H4K8la_peak_5280 | 9.6708   |                                                                      |
| 6 | 1.5E+08 | 1.5E+08 | KD2-H4K8la_peak_5281 | 5.58883  |                                                                      |
| 6 | 1.5E+08 | 1.5E+08 | KD2-H4K8la_peak_5282 | 6.70626  |                                                                      |
| 6 | 1.5E+08 | 1.5E+08 | KD2-H4K8la_peak_5283 | 7.3036   | RGS17_ENSG00000091844                                                |
| 6 | 1.6E+08 | 1.6E+08 | KD2-H4K8la_peak_5284 | 6.97699  | SCAF8_ENSG00000213079                                                |
| 6 | 1.6E+08 | 1.6E+08 | KD2-H4K8la_peak_5285 | 7.13237  |                                                                      |
| 6 | 1.6E+08 | 1.6E+08 | KD2-H4K8la_peak_5286 | 5.05146  |                                                                      |
| 6 | 1.6E+08 | 1.6E+08 | KD2-H4K8la_peak_5287 | 9.9701   | SNX9_ENSG00000130340                                                 |
| 6 | 1.6E+08 | 1.6E+08 | KD2-H4K8la_peak_5288 | 6.88801  |                                                                      |

|   |         |         |                      |          |                                                        |
|---|---------|---------|----------------------|----------|--------------------------------------------------------|
| 6 | 1.6E+08 | 1.6E+08 | KD2-H4K8la_peak_5289 | 5.58883  | C6orf99_ENSG00000203711                                |
| 6 | 1.6E+08 | 1.6E+08 | KD2-H4K8la_peak_5290 | 5.58883  |                                                        |
| 6 | 1.6E+08 | 1.6E+08 | KD2-H4K8la_peak_5291 | 10.04111 | TCP1_ENSG00000120438;MRPL18_ENSG00000112110            |
| 6 | 1.6E+08 | 1.6E+08 | KD2-H4K8la_peak_5292 | 7.45264  | PARK2_ENSG00000185345;PACRG_ENSG00000112530            |
| 6 | 1.6E+08 | 1.6E+08 | KD2-H4K8la_peak_5293 | 5.78071  |                                                        |
| 6 | 1.7E+08 | 1.7E+08 | KD2-H4K8la_peak_5294 | 6.3399   |                                                        |
| 6 | 1.7E+08 | 1.7E+08 | KD2-H4K8la_peak_5295 | 11.60966 | SFT2D1_ENSG00000198818                                 |
| 6 | 1.7E+08 | 1.7E+08 | KD2-H4K8la_peak_5296 | 8.76116  | SFT2D1_ENSG00000198818                                 |
| 6 | 1.7E+08 | 1.7E+08 | KD2-H4K8la_peak_5297 | 15.42498 |                                                        |
| 6 | 1.7E+08 | 1.7E+08 | KD2-H4K8la_peak_5298 | 8.73956  |                                                        |
| 6 | 1.7E+08 | 1.7E+08 | KD2-H4K8la_peak_5299 | 5.37421  |                                                        |
| 6 | 1.7E+08 | 1.7E+08 | KD2-H4K8la_peak_5300 | 4.66473  |                                                        |
| 6 | 1.7E+08 | 1.7E+08 | KD2-H4K8la_peak_5301 | 12.97881 |                                                        |
| 6 | 1.7E+08 | 1.7E+08 | KD2-H4K8la_peak_5302 | 8.19799  |                                                        |
| 6 | 1.7E+08 | 1.7E+08 | KD2-H4K8la_peak_5303 | 5.83285  |                                                        |
| 6 | 1.7E+08 | 1.7E+08 | KD2-H4K8la_peak_5304 | 8.37064  |                                                        |
| 6 | 1.7E+08 | 1.7E+08 | KD2-H4K8la_peak_5305 | 10.04111 | MLLT4-AS1_ENSG00000198221;MLLT4_ENSG00000130396        |
| 6 | 1.7E+08 | 1.7E+08 | KD2-H4K8la_peak_5306 | 7.64726  |                                                        |
| 6 | 1.7E+08 | 1.7E+08 | KD2-H4K8la_peak_5307 | 10.34978 | XXyac-YX65C7_A.2_ENSG00000226445                       |
| 6 | 1.7E+08 | 1.7E+08 | KD2-H4K8la_peak_5308 | 15.75402 | PHF10_ENSG00000130024                                  |
| 6 | 1.7E+08 | 1.7E+08 | KD2-H4K8la_peak_5309 | 5.83285  |                                                        |
| 6 | 1.7E+08 | 1.7E+08 | KD2-H4K8la_peak_5310 | 9.66714  |                                                        |
| 7 | 149749  | 150591  | KD2-H4K8la_peak_5311 | 13.84838 | AC093627.9_ENSG00000242474;AC093627.10_ENSG00000240859 |
| 7 | 495143  | 495748  | KD2-H4K8la_peak_5312 | 7.55141  |                                                        |
| 7 | 533145  | 534084  | KD2-H4K8la_peak_5313 | 15.50379 |                                                        |
| 7 | 751501  | 752187  | KD2-H4K8la_peak_5314 | 10.87112 |                                                        |
| 7 | 752425  | 752666  | KD2-H4K8la_peak_5315 | 13.14693 |                                                        |
| 7 | 765394  | 765631  | KD2-H4K8la_peak_5316 | 8.44557  | HEATR2_ENSG00000164818                                 |
| 7 | 766541  | 766836  | KD2-H4K8la_peak_5317 | 6.93796  | PRKAR1B_ENSG00000188191;HEATR2_ENSG00000164818         |
| 7 | 808523  | 808791  | KD2-H4K8la_peak_5318 | 16.1269  |                                                        |
| 7 | 810016  | 810480  | KD2-H4K8la_peak_5319 | 10.16316 |                                                        |
| 7 | 941536  | 941780  | KD2-H4K8la_peak_5320 | 9.61894  |                                                        |
| 7 | 949188  | 949427  | KD2-H4K8la_peak_5321 | 7.12014  |                                                        |
| 7 | 1136407 | 1136616 | KD2-H4K8la_peak_5322 | 6.34062  |                                                        |
| 7 | 1178192 | 1178495 | KD2-H4K8la_peak_5323 | 6.47589  | C7orf50_ENSG00000146540                                |
| 7 | 1200116 | 1200703 | KD2-H4K8la_peak_5324 | 15.88392 | ZFAND2A_ENSG00000178381;AC091729.9_ENSG00000229043     |
| 7 | 1215450 | 1215798 | KD2-H4K8la_peak_5325 | 9.61894  |                                                        |
| 7 | 1570578 | 1570832 | KD2-H4K8la_peak_5326 | 8.29917  | MAFK_ENSG00000198517                                   |
| 7 | 1578234 | 1578474 | KD2-H4K8la_peak_5327 | 4.6555   |                                                        |
| 7 | 1608796 | 1609060 | KD2-H4K8la_peak_5328 | 4.6555   | PSMG3-AS1_ENSG00000230487                              |
| 7 | 1609386 | 1609613 | KD2-H4K8la_peak_5329 | 13.84838 | PSMG3-AS1_ENSG00000230487                              |
| 7 | 1625399 | 1626123 | KD2-H4K8la_peak_5330 | 10.97465 |                                                        |
| 7 | 1626412 | 1626890 | KD2-H4K8la_peak_5331 | 12.97817 |                                                        |
| 7 | 1680229 | 1681056 | KD2-H4K8la_peak_5332 | 13.18253 |                                                        |
| 7 | 1753268 | 1753524 | KD2-H4K8la_peak_5333 | 5.76341  |                                                        |
| 7 | 1878778 | 1879115 | KD2-H4K8la_peak_5334 | 10.71653 | AC110781.3_ENSG00000176349                             |

|   |         |         |                      |          |                                                               |
|---|---------|---------|----------------------|----------|---------------------------------------------------------------|
| 7 | 1897104 | 1897449 | KD2-H4K8la_peak_5335 | 6.77116  |                                                               |
| 7 | 2118642 | 2118886 | KD2-H4K8la_peak_5336 | 8.4237   |                                                               |
| 7 | 2143148 | 2143657 | KD2-H4K8la_peak_5337 | 7.94013  |                                                               |
| 7 | 2145298 | 2145588 | KD2-H4K8la_peak_5338 | 7.63903  |                                                               |
| 7 | 2148464 | 2148871 | KD2-H4K8la_peak_5339 | 10.02511 |                                                               |
| 7 | 2177864 | 2178166 | KD2-H4K8la_peak_5340 | 5.43278  |                                                               |
| 7 | 2178472 | 2178807 | KD2-H4K8la_peak_5341 | 6.68593  |                                                               |
| 7 | 2201439 | 2201766 | KD2-H4K8la_peak_5342 | 10.34952 |                                                               |
| 7 | 2281332 | 2281752 | KD2-H4K8la_peak_5343 | 14.7348  | FTSJ2_ENSG00000122687;NUDT1_ENSG00000106268                   |
| 7 | 2353763 | 2353975 | KD2-H4K8la_peak_5344 | 7.23932  |                                                               |
| 7 | 2394568 | 2395105 | KD2-H4K8la_peak_5345 | 8.24908  | SNX8_ENSG00000106266;EIF3B_ENSG00000106263                    |
| 7 | 2491431 | 2491780 | KD2-H4K8la_peak_5346 | 6.94579  |                                                               |
| 7 | 2535220 | 2535607 | KD2-H4K8la_peak_5347 | 8.89364  |                                                               |
| 7 | 2563878 | 2564392 | KD2-H4K8la_peak_5348 | 4.6555   |                                                               |
| 7 | 2595854 | 2596136 | KD2-H4K8la_peak_5349 | 9.40293  | BRAT1_ENSG00000106009                                         |
| 7 | 2661557 | 2661766 | KD2-H4K8la_peak_5350 | 7.01929  |                                                               |
| 7 | 2671663 | 2671986 | KD2-H4K8la_peak_5351 | 14.86256 | TTYH3_ENSG00000136295                                         |
| 7 | 2684642 | 2684891 | KD2-H4K8la_peak_5352 | 6.36953  |                                                               |
| 7 | 2685381 | 2685643 | KD2-H4K8la_peak_5353 | 7.23932  |                                                               |
| 7 | 2969375 | 2969657 | KD2-H4K8la_peak_5354 | 5.80814  |                                                               |
| 7 | 3283202 | 3283566 | KD2-H4K8la_peak_5355 | 8.83119  |                                                               |
| 7 | 4091275 | 4091596 | KD2-H4K8la_peak_5356 | 13.01988 |                                                               |
| 7 | 4183531 | 4184087 | KD2-H4K8la_peak_5357 | 10.16316 |                                                               |
| 7 | 4184867 | 4185677 | KD2-H4K8la_peak_5358 | 6.37643  |                                                               |
| 7 | 4721226 | 4721739 | KD2-H4K8la_peak_5359 | 12.72886 |                                                               |
| 7 | 4814486 | 4814968 | KD2-H4K8la_peak_5360 | 10.64143 | AP5Z1_ENSG00000242802                                         |
| 7 | 5084813 | 5085237 | KD2-H4K8la_peak_5361 | 8.48577  | RBAK_ENSG00000146587                                          |
| 7 | 5085635 | 5085901 | KD2-H4K8la_peak_5362 | 4.9591   | RBAK_ENSG00000146587                                          |
| 7 | 5280263 | 5280470 | KD2-H4K8la_peak_5363 | 9.29385  |                                                               |
| 7 | 5315682 | 5316343 | KD2-H4K8la_peak_5364 | 7.68525  | AC093376.1_ENSG00000263808                                    |
| 7 | 5464662 | 5464915 | KD2-H4K8la_peak_5365 | 10.02595 | TNRC18_ENSG00000182095;RP11-1275H24.2_ENSG00000272953         |
| 7 | 5466051 | 5466424 | KD2-H4K8la_peak_5366 | 9.19451  | RP11-1275H24.2_ENSG00000272953                                |
| 7 | 5466921 | 5467592 | KD2-H4K8la_peak_5367 | 9.40293  | RP11-1275H24.1_ENSG00000234432;RP11-1275H24.3_ENSG00000273084 |
| 7 | 5468939 | 5469405 | KD2-H4K8la_peak_5368 | 6.47266  | RP11-1275H24.1_ENSG00000234432;RP11-1275H24.3_ENSG00000273084 |
| 7 | 5553996 | 5554212 | KD2-H4K8la_peak_5369 | 9.19451  | FBXL18_ENSG00000155034                                        |
| 7 | 5569805 | 5570156 | KD2-H4K8la_peak_5370 | 16.3941  |                                                               |
| 7 | 5570488 | 5570957 | KD2-H4K8la_peak_5371 | 12.42246 |                                                               |
| 7 | 5595836 | 5596068 | KD2-H4K8la_peak_5372 | 9.92722  | CTB-161C1.1_ENSG00000272719                                   |
| 7 | 5596323 | 5596627 | KD2-H4K8la_peak_5373 | 5.43278  | CTB-161C1.1_ENSG00000272719                                   |
| 7 | 5601923 | 5602256 | KD2-H4K8la_peak_5374 | 7.60503  |                                                               |
| 7 | 5610061 | 5610342 | KD2-H4K8la_peak_5375 | 12.72886 |                                                               |
| 7 | 5614698 | 5615180 | KD2-H4K8la_peak_5376 | 8.39919  |                                                               |
| 7 | 5634177 | 5634420 | KD2-H4K8la_peak_5377 | 7.13246  |                                                               |
| 7 | 5674296 | 5674729 | KD2-H4K8la_peak_5378 | 13.27013 |                                                               |
| 7 | 5821511 | 5821865 | KD2-H4K8la_peak_5379 | 6.40658  | RNF216_ENSG00000011275                                        |
| 7 | 5861789 | 5861987 | KD2-H4K8la_peak_5380 | 9.52146  | ZNF815P_ENSG00000235944                                       |

|   |         |         |                      |          |                                                                            |
|---|---------|---------|----------------------|----------|----------------------------------------------------------------------------|
| 7 | 5862819 | 5863285 | KD2-H4K8la_peak_5381 | 8.39677  | ZNF815P_ENSG00000235944                                                    |
| 7 | 6048316 | 6048559 | KD2-H4K8la_peak_5382 | 7.94013  | PMS2_ENSG00000122512;AIMP2_ENSG00000106305                                 |
| 7 | 6098503 | 6098705 | KD2-H4K8la_peak_5383 | 8.84265  | EIF2AK1_ENSG00000086232                                                    |
| 7 | 6099100 | 6099379 | KD2-H4K8la_peak_5384 | 10.27876 | EIF2AK1_ENSG00000086232                                                    |
| 7 | 6143870 | 6144125 | KD2-H4K8la_peak_5385 | 9.9149   | USP42_ENSG00000106346                                                      |
| 7 | 6413294 | 6413844 | KD2-H4K8la_peak_5386 | 11.15747 | RAC1_ENSG00000136238                                                       |
| 7 | 6414294 | 6414522 | KD2-H4K8la_peak_5387 | 4.86896  | RAC1_ENSG00000136238                                                       |
| 7 | 6617176 | 6617733 | KD2-H4K8la_peak_5388 | 8.39919  | ZDHHC4_ENSG00000136247                                                     |
| 7 | 6654695 | 6655061 | KD2-H4K8la_peak_5389 | 9.7321   | ZNF853_ENSG00000236609                                                     |
| 7 | 6655368 | 6655655 | KD2-H4K8la_peak_5390 | 6.3399   | ZNF853_ENSG00000236609                                                     |
| 7 | 6676648 | 6676854 | KD2-H4K8la_peak_5391 | 8.16916  | ZNF316_ENSG00000205903                                                     |
| 7 | 6677568 | 6677772 | KD2-H4K8la_peak_5392 | 6.68593  | ZNF316_ENSG00000205903                                                     |
| 7 | 6703655 | 6703983 | KD2-H4K8la_peak_5393 | 17.74667 | AC073343.13_ENSG00000228010                                                |
| 7 | 6768640 | 6769279 | KD2-H4K8la_peak_5394 | 16.13548 |                                                                            |
| 7 | 6769580 | 6769797 | KD2-H4K8la_peak_5395 | 8.62939  |                                                                            |
| 7 | 6894643 | 6895094 | KD2-H4K8la_peak_5396 | 10.49982 |                                                                            |
| 7 | 7396818 | 7397037 | KD2-H4K8la_peak_5397 | 8.12047  |                                                                            |
| 7 | 7701916 | 7702219 | KD2-H4K8la_peak_5398 | 6.79079  |                                                                            |
| 7 | 8300857 | 8302299 | KD2-H4K8la_peak_5399 | 20.29575 | ICA1_ENSG00000003147;AC007009.1_ENSG00000244239;AC007128.1_ENSG00000229970 |
| 7 | 8331799 | 8332145 | KD2-H4K8la_peak_5400 | 7.41831  |                                                                            |
| 7 | 1.3E+07 | 1.3E+07 | KD2-H4K8la_peak_5401 | 7.12972  | ARL4A_ENSG00000122644                                                      |
| 7 | 1.6E+07 | 1.6E+07 | KD2-H4K8la_peak_5402 | 7.06427  | ISPD_ENSG00000214960                                                       |
| 7 | 1.8E+07 | 1.8E+07 | KD2-H4K8la_peak_5403 | 7.16303  | SNX13_ENSG00000071189                                                      |
| 7 | 1.9E+07 | 1.9E+07 | KD2-H4K8la_peak_5404 | 5.19328  |                                                                            |
| 7 | 1.9E+07 | 1.9E+07 | KD2-H4K8la_peak_5405 | 14.15376 |                                                                            |
| 7 | 1.9E+07 | 1.9E+07 | KD2-H4K8la_peak_5406 | 5.29444  | TWIST1_ENSG00000122691                                                     |
| 7 | 1.9E+07 | 1.9E+07 | KD2-H4K8la_peak_5407 | 7.12014  | TWIST1_ENSG00000122691                                                     |
| 7 | 2E+07   | 2E+07   | KD2-H4K8la_peak_5408 | 8.07102  | TWISTNB_ENSG00000105849                                                    |
| 7 | 2E+07   | 2E+07   | KD2-H4K8la_peak_5409 | 6.56022  | CTA-293F17.1_ENSG00000271133;ITGB8_ENSG00000105855                         |
| 7 | 2.3E+07 | 2.3E+07 | KD2-H4K8la_peak_5410 | 11.77509 | TOMM7_ENSG00000196683                                                      |
| 7 | 2.3E+07 | 2.3E+07 | KD2-H4K8la_peak_5411 | 8.12466  | TOMM7_ENSG00000196683                                                      |
| 7 | 2.3E+07 | 2.3E+07 | KD2-H4K8la_peak_5412 | 6.96161  | NUPL2_ENSG00000136243                                                      |
| 7 | 2.3E+07 | 2.3E+07 | KD2-H4K8la_peak_5413 | 7.12308  | AC005082.12_ENSG00000226816                                                |
| 7 | 2.4E+07 | 2.4E+07 | KD2-H4K8la_peak_5414 | 6.71169  |                                                                            |
| 7 | 2.4E+07 | 2.4E+07 | KD2-H4K8la_peak_5415 | 13.11108 | IGF2BP3_ENSG00000136231                                                    |
| 7 | 2.4E+07 | 2.4E+07 | KD2-H4K8la_peak_5416 | 14.22324 |                                                                            |
| 7 | 2.4E+07 | 2.4E+07 | KD2-H4K8la_peak_5417 | 9.10568  | RPS2P32_ENSG00000232818                                                    |
| 7 | 2.4E+07 | 2.4E+07 | KD2-H4K8la_peak_5418 | 6.79903  | TRA2A_ENSG00000164548                                                      |
| 7 | 2.4E+07 | 2.4E+07 | KD2-H4K8la_peak_5419 | 14.44261 | FAM221A_ENSG00000188732;AC006026.13_ENSG00000234286                        |
| 7 | 2.4E+07 | 2.4E+07 | KD2-H4K8la_peak_5420 | 13.13367 |                                                                            |
| 7 | 2.4E+07 | 2.4E+07 | KD2-H4K8la_peak_5421 | 6.64804  |                                                                            |
| 7 | 2.4E+07 | 2.4E+07 | KD2-H4K8la_peak_5422 | 6.3399   | NPY_ENSG00000122585                                                        |
| 7 | 2.5E+07 | 2.5E+07 | KD2-H4K8la_peak_5423 | 9.7321   |                                                                            |
| 7 | 2.5E+07 | 2.5E+07 | KD2-H4K8la_peak_5424 | 7.65547  | OSBPL3_ENSG00000070882                                                     |
| 7 | 2.5E+07 | 2.5E+07 | KD2-H4K8la_peak_5425 | 6.09229  | C7orf31_ENSG00000153790                                                    |
| 7 | 2.6E+07 | 2.6E+07 | KD2-H4K8la_peak_5426 | 6.57426  |                                                                            |

|   |         |         |                      |          |                                                                            |
|---|---------|---------|----------------------|----------|----------------------------------------------------------------------------|
| 7 | 2.6E+07 | 2.6E+07 | KD2-H4K8la_peak_5427 | 12.32641 |                                                                            |
| 7 | 2.6E+07 | 2.6E+07 | KD2-H4K8la_peak_5428 | 6.37643  | NFE2L3_ENSG00000050344                                                     |
| 7 | 2.6E+07 | 2.6E+07 | KD2-H4K8la_peak_5429 | 5.43278  | HNRNPA2B1_ENSG00000122566;CBX3_ENSG00000122565                             |
| 7 | 2.6E+07 | 2.6E+07 | KD2-H4K8la_peak_5430 | 7.06427  | HNRNPA2B1_ENSG00000122566;CBX3_ENSG00000122565                             |
| 7 | 2.6E+07 | 2.6E+07 | KD2-H4K8la_peak_5431 | 12.43915 | HNRNPA2B1_ENSG00000122566;CBX3_ENSG00000122565                             |
| 7 | 2.6E+07 | 2.6E+07 | KD2-H4K8la_peak_5432 | 4.66473  | AC004540.4_ENSG00000225792                                                 |
| 7 | 2.7E+07 | 2.7E+07 | KD2-H4K8la_peak_5433 | 4.53237  |                                                                            |
| 7 | 2.8E+07 | 2.8E+07 | KD2-H4K8la_peak_5434 | 6.26214  |                                                                            |
| 7 | 2.9E+07 | 2.9E+07 | KD2-H4K8la_peak_5435 | 5.78862  | AC005013.5_ENSG00000228421                                                 |
| 7 | 2.9E+07 | 2.9E+07 | KD2-H4K8la_peak_5436 | 6.9399   | AC005013.1_ENSG00000255690;TRIL_ENSG00000176734;AC005013.5_ENSG00000228421 |
| 7 | 3E+07   | 3E+07   | KD2-H4K8la_peak_5437 | 12.62032 | ZNRF2P2_ENSG00000225264                                                    |
| 7 | 3E+07   | 3E+07   | KD2-H4K8la_peak_5438 | 7.77341  |                                                                            |
| 7 | 3.1E+07 | 3.1E+07 | KD2-H4K8la_peak_5439 | 7.0396   |                                                                            |
| 7 | 3.1E+07 | 3.1E+07 | KD2-H4K8la_peak_5440 | 7.66936  |                                                                            |
| 7 | 3.1E+07 | 3.1E+07 | KD2-H4K8la_peak_5441 | 10.37746 | FAM188B_ENSG00000106125                                                    |
| 7 | 3.1E+07 | 3.1E+07 | KD2-H4K8la_peak_5442 | 6.23074  |                                                                            |
| 7 | 3.1E+07 | 3.1E+07 | KD2-H4K8la_peak_5443 | 8.84265  |                                                                            |
| 7 | 3.1E+07 | 3.1E+07 | KD2-H4K8la_peak_5444 | 7.3993   |                                                                            |
| 7 | 3.3E+07 | 3.3E+07 | KD2-H4K8la_peak_5445 | 7.11805  |                                                                            |
| 7 | 3.3E+07 | 3.3E+07 | KD2-H4K8la_peak_5446 | 7.7007   | FKBP9_ENSG00000122642                                                      |
| 7 | 3.3E+07 | 3.3E+07 | KD2-H4K8la_peak_5447 | 6.3399   | RP9_ENSG00000164610                                                        |
| 7 | 3.5E+07 | 3.5E+07 | KD2-H4K8la_peak_5448 | 5.10388  | DPY19L1_ENSG00000173852                                                    |
| 7 | 3.6E+07 | 3.6E+07 | KD2-H4K8la_peak_5449 | 5.67596  |                                                                            |
| 7 | 3.6E+07 | 3.6E+07 | KD2-H4K8la_peak_5450 | 11.52725 | KIAA0895_ENSG00000164542;ANLN_ENSG00000011426                              |
| 7 | 3.7E+07 | 3.7E+07 | KD2-H4K8la_peak_5451 | 4.86896  |                                                                            |
| 7 | 3.7E+07 | 3.7E+07 | KD2-H4K8la_peak_5452 | 7.49467  | ELMO1_ENSG00000155849                                                      |
| 7 | 3.8E+07 | 3.8E+07 | KD2-H4K8la_peak_5453 | 4.69635  |                                                                            |
| 7 | 3.8E+07 | 3.8E+07 | KD2-H4K8la_peak_5454 | 8.37064  | STARD3NL_ENSG00000010270                                                   |
| 7 | 3.9E+07 | 3.9E+07 | KD2-H4K8la_peak_5455 | 13.2369  |                                                                            |
| 7 | 4E+07   | 4E+07   | KD2-H4K8la_peak_5456 | 5.16795  |                                                                            |
| 7 | 4E+07   | 4E+07   | KD2-H4K8la_peak_5457 | 9.12246  | RALA_ENSG00000006451                                                       |
| 7 | 4E+07   | 4E+07   | KD2-H4K8la_peak_5458 | 10.92814 | LINC00265_ENSG00000188185                                                  |
| 7 | 4E+07   | 4E+07   | KD2-H4K8la_peak_5459 | 4.86896  | RP11-467D6.1_ENSG00000259826;CDK13_ENSG00000065883                         |
| 7 | 4.1E+07 | 4.1E+07 | KD2-H4K8la_peak_5460 | 8.00569  |                                                                            |
| 7 | 4.3E+07 | 4.3E+07 | KD2-H4K8la_peak_5461 | 4.30663  |                                                                            |
| 7 | 4.4E+07 | 4.4E+07 | KD2-H4K8la_peak_5462 | 4.60174  | BLVRA_ENSG00000106605                                                      |
| 7 | 4.4E+07 | 4.4E+07 | KD2-H4K8la_peak_5463 | 8.39919  | BLVRA_ENSG00000106605                                                      |
| 7 | 4.4E+07 | 4.4E+07 | KD2-H4K8la_peak_5464 | 8.24908  | URGCP-MRPS24_ENSG00000270617                                               |
| 7 | 4.4E+07 | 4.4E+07 | KD2-H4K8la_peak_5465 | 6.77116  | URGCP_ENSG00000106608;UBE2D4_ENSG00000078967                               |
| 7 | 4.4E+07 | 4.4E+07 | KD2-H4K8la_peak_5466 | 6.68593  |                                                                            |
| 7 | 4.4E+07 | 4.4E+07 | KD2-H4K8la_peak_5467 | 8.89364  | AEBP1_ENSG00000106624                                                      |
| 7 | 4.4E+07 | 4.4E+07 | KD2-H4K8la_peak_5468 | 8.62002  |                                                                            |
| 7 | 4.4E+07 | 4.4E+07 | KD2-H4K8la_peak_5469 | 8.1293   |                                                                            |
| 7 | 4.4E+07 | 4.4E+07 | KD2-H4K8la_peak_5470 | 9.70768  |                                                                            |
| 7 | 4.4E+07 | 4.4E+07 | KD2-H4K8la_peak_5471 | 7.7007   |                                                                            |
| 7 | 4.4E+07 | 4.4E+07 | KD2-H4K8la_peak_5472 | 9.64487  |                                                                            |

|   |         |         |                      |          |                                                         |
|---|---------|---------|----------------------|----------|---------------------------------------------------------|
| 7 | 4.5E+07 | 4.5E+07 | KD2-H4K8la_peak_5473 | 5.22616  |                                                         |
| 7 | 4.5E+07 | 4.5E+07 | KD2-H4K8la_peak_5474 | 10.49982 | TMED4_ENSG00000158604                                   |
| 7 | 4.5E+07 | 4.5E+07 | KD2-H4K8la_peak_5475 | 7.55141  | ZMIZ2_ENSG00000122515                                   |
| 7 | 4.5E+07 | 4.5E+07 | KD2-H4K8la_peak_5476 | 8.16787  |                                                         |
| 7 | 4.5E+07 | 4.5E+07 | KD2-H4K8la_peak_5477 | 13.85062 | PPIA_ENSG00000196262                                    |
| 7 | 4.5E+07 | 4.5E+07 | KD2-H4K8la_peak_5478 | 11.40266 | PURB_ENSG00000146676;RP4-673M15.1_ENSG00000272768       |
| 7 | 4.5E+07 | 4.5E+07 | KD2-H4K8la_peak_5479 | 10.02595 | PURB_ENSG00000146676;RP4-673M15.1_ENSG00000272768       |
| 7 | 4.5E+07 | 4.5E+07 | KD2-H4K8la_peak_5480 | 6.68593  | SNHG15_ENSG00000232956                                  |
| 7 | 4.6E+07 | 4.6E+07 | KD2-H4K8la_peak_5481 | 8.89364  | ADCY1_ENSG00000164742                                   |
| 7 | 4.6E+07 | 4.6E+07 | KD2-H4K8la_peak_5482 | 9.78176  |                                                         |
| 7 | 4.6E+07 | 4.6E+07 | KD2-H4K8la_peak_5483 | 7.23932  |                                                         |
| 7 | 4.6E+07 | 4.6E+07 | KD2-H4K8la_peak_5484 | 9.20163  | SEPT7P2_ENSG00000214765                                 |
| 7 | 4.8E+07 | 4.8E+07 | KD2-H4K8la_peak_5485 | 7.3993   |                                                         |
| 7 | 4.8E+07 | 4.8E+07 | KD2-H4K8la_peak_5486 | 7.60503  |                                                         |
| 7 | 4.8E+07 | 4.8E+07 | KD2-H4K8la_peak_5487 | 8.71024  |                                                         |
| 7 | 4.8E+07 | 4.8E+07 | KD2-H4K8la_peak_5488 | 7.55141  |                                                         |
| 7 | 4.8E+07 | 4.8E+07 | KD2-H4K8la_peak_5489 | 15.63685 |                                                         |
| 7 | 4.8E+07 | 4.8E+07 | KD2-H4K8la_peak_5490 | 8.73956  |                                                         |
| 7 | 4.8E+07 | 4.8E+07 | KD2-H4K8la_peak_5491 | 8.76116  |                                                         |
| 7 | 5.1E+07 | 5.1E+07 | KD2-H4K8la_peak_5492 | 9.17646  | FIGNL1_ENSG00000132436                                  |
| 7 | 5.1E+07 | 5.1E+07 | KD2-H4K8la_peak_5493 | 8.33263  |                                                         |
| 7 | 5.1E+07 | 5.1E+07 | KD2-H4K8la_peak_5494 | 5.99671  |                                                         |
| 7 | 5.6E+07 | 5.6E+07 | KD2-H4K8la_peak_5495 | 7.13528  | VOPP1_ENSG00000154978;RP11-310H4.1_ENSG00000223475      |
| 7 | 5.6E+07 | 5.6E+07 | KD2-H4K8la_peak_5496 | 8.39919  | GBAS_ENSG00000146729;MRPS17_ENSG00000239789             |
| 7 | 5.6E+07 | 5.6E+07 | KD2-H4K8la_peak_5497 | 6.47266  |                                                         |
| 7 | 5.6E+07 | 5.6E+07 | KD2-H4K8la_peak_5498 | 7.49467  | SUMF2_ENSG00000129103                                   |
| 7 | 6.4E+07 | 6.4E+07 | KD2-H4K8la_peak_5499 | 8.13557  |                                                         |
| 7 | 6.4E+07 | 6.4E+07 | KD2-H4K8la_peak_5500 | 5.43278  |                                                         |
| 7 | 6.4E+07 | 6.4E+07 | KD2-H4K8la_peak_5501 | 6.96161  | ZNF107_ENSG00000196247                                  |
| 7 | 6.4E+07 | 6.4E+07 | KD2-H4K8la_peak_5502 | 9.81238  | ZNF138_ENSG00000197008                                  |
| 7 | 6.4E+07 | 6.4E+07 | KD2-H4K8la_peak_5503 | 4.69635  | ZNF117_ENSG00000152926;ERV3-1_ENSG00000213462           |
| 7 | 6.5E+07 | 6.5E+07 | KD2-H4K8la_peak_5504 | 6.56022  |                                                         |
| 7 | 6.5E+07 | 6.5E+07 | KD2-H4K8la_peak_5505 | 12.83706 | GUSB_ENSG00000169919                                    |
| 7 | 6.6E+07 | 6.6E+07 | KD2-H4K8la_peak_5506 | 10.87112 | CRCP_ENSG00000241258                                    |
| 7 | 6.6E+07 | 6.6E+07 | KD2-H4K8la_peak_5507 | 8.02952  |                                                         |
| 7 | 6.6E+07 | 6.6E+07 | KD2-H4K8la_peak_5508 | 7.41831  | TPST1_ENSG00000169902                                   |
| 7 | 6.6E+07 | 6.6E+07 | KD2-H4K8la_peak_5509 | 5.28646  |                                                         |
| 7 | 6.6E+07 | 6.6E+07 | KD2-H4K8la_peak_5510 | 5.90392  | GS1-124K5.3_ENSG00000223473;GS1-124K5.4_ENSG00000237310 |
| 7 | 6.6E+07 | 6.6E+07 | KD2-H4K8la_peak_5511 | 6.54523  | KCTD7_ENSG00000243335                                   |
| 7 | 6.6E+07 | 6.6E+07 | KD2-H4K8la_peak_5512 | 9.29385  | RP4-756H11.3_ENSG00000226824                            |
| 7 | 6.6E+07 | 6.6E+07 | KD2-H4K8la_peak_5513 | 6.68593  | GTF2IRD1P1_ENSG00000230583                              |
| 7 | 6.6E+07 | 6.6E+07 | KD2-H4K8la_peak_5514 | 10.66741 | TMEM248_ENSG00000106609                                 |
| 7 | 6.6E+07 | 6.6E+07 | KD2-H4K8la_peak_5515 | 9.78176  | SBDS_ENSG00000126524;TYW1_ENSG00000198874               |
| 7 | 6.9E+07 | 6.9E+07 | KD2-H4K8la_peak_5516 | 9.67249  | RP5-942I16.1_ENSG00000234215;AUTS2_ENSG00000158321      |
| 7 | 7.2E+07 | 7.2E+07 | KD2-H4K8la_peak_5517 | 5.78071  |                                                         |
| 7 | 7.2E+07 | 7.2E+07 | KD2-H4K8la_peak_5518 | 5.5899   |                                                         |



|   |         |         |                      |          |                                                    |
|---|---------|---------|----------------------|----------|----------------------------------------------------|
| 7 | 7.3E+07 | 7.3E+07 | KD2-H4K8la_peak_5519 | 9.41838  | NSUN5_ENSG00000130305                              |
| 7 | 7.3E+07 | 7.3E+07 | KD2-H4K8la_peak_5520 | 11.40266 |                                                    |
| 7 | 7.3E+07 | 7.3E+07 | KD2-H4K8la_peak_5521 | 12.32641 |                                                    |
| 7 | 7.3E+07 | 7.3E+07 | KD2-H4K8la_peak_5522 | 9.67249  |                                                    |
| 7 | 7.3E+07 | 7.3E+07 | KD2-H4K8la_peak_5523 | 12.49088 | BAZ1B_ENSG00000009954                              |
| 7 | 7.3E+07 | 7.3E+07 | KD2-H4K8la_peak_5524 | 12.17279 | BCL7B_ENSG00000106635                              |
| 7 | 7.3E+07 | 7.3E+07 | KD2-H4K8la_peak_5525 | 7.53542  | DNAJC30_ENSG00000176410;WBSCR22_ENSG00000071462    |
| 7 | 7.3E+07 | 7.3E+07 | KD2-H4K8la_peak_5526 | 7.94013  | ABHD11_ENSG00000106077                             |
| 7 | 7.3E+07 | 7.3E+07 | KD2-H4K8la_peak_5527 | 8.78491  | WBSCR27_ENSG00000165171                            |
| 7 | 7.3E+07 | 7.3E+07 | KD2-H4K8la_peak_5528 | 9.93607  |                                                    |
| 7 | 7.3E+07 | 7.3E+07 | KD2-H4K8la_peak_5529 | 11.7362  | LIMK1_ENSG00000106683                              |
| 7 | 7.3E+07 | 7.3E+07 | KD2-H4K8la_peak_5530 | 5.84385  |                                                    |
| 7 | 7.4E+07 | 7.4E+07 | KD2-H4K8la_peak_5531 | 4.66473  |                                                    |
| 7 | 7.4E+07 | 7.4E+07 | KD2-H4K8la_peak_5532 | 6.3399   |                                                    |
| 7 | 7.4E+07 | 7.4E+07 | KD2-H4K8la_peak_5533 | 5.27164  | EIF4H_ENSG00000106682                              |
| 7 | 7.4E+07 | 7.4E+07 | KD2-H4K8la_peak_5534 | 12.12824 | EIF4H_ENSG00000106682                              |
| 7 | 7.4E+07 | 7.4E+07 | KD2-H4K8la_peak_5535 | 6.64804  |                                                    |
| 7 | 7.4E+07 | 7.4E+07 | KD2-H4K8la_peak_5536 | 12.14568 |                                                    |
| 7 | 7.4E+07 | 7.4E+07 | KD2-H4K8la_peak_5537 | 4.81796  | CLIP2_ENSG00000106665                              |
| 7 | 7.4E+07 | 7.4E+07 | KD2-H4K8la_peak_5538 | 6.50951  | CLIP2_ENSG00000106665                              |
| 7 | 7.4E+07 | 7.4E+07 | KD2-H4K8la_peak_5539 | 6.47266  | GTF2IRD1_ENSG00000006704                           |
| 7 | 7.4E+07 | 7.4E+07 | KD2-H4K8la_peak_5540 | 5.99671  | GTF2IRD1_ENSG00000006704                           |
| 7 | 7.4E+07 | 7.4E+07 | KD2-H4K8la_peak_5541 | 7.94013  |                                                    |
| 7 | 7.4E+07 | 7.4E+07 | KD2-H4K8la_peak_5542 | 5.99671  | RP5-1186P10.2_ENSG00000273069                      |
| 7 | 7.4E+07 | 7.4E+07 | KD2-H4K8la_peak_5543 | 10.47118 | GTF2I_ENSG00000077809                              |
| 7 | 7.4E+07 | 7.4E+07 | KD2-H4K8la_peak_5544 | 31.11291 | GTF2I_ENSG00000077809                              |
| 7 | 7.4E+07 | 7.4E+07 | KD2-H4K8la_peak_5545 | 5.84385  | WBSCR16_ENSG00000174374                            |
| 7 | 7.4E+07 | 7.4E+07 | KD2-H4K8la_peak_5546 | 14.15376 | WBSCR16_ENSG00000174374                            |
| 7 | 7.5E+07 | 7.5E+07 | KD2-H4K8la_peak_5547 | 10.49982 | POM121C_ENSG00000135213;AC006014.7_ENSG00000242073 |
| 7 | 7.5E+07 | 7.5E+07 | KD2-H4K8la_peak_5548 | 5.80814  | PMS2P3_ENSG00000127957                             |
| 7 | 7.5E+07 | 7.5E+07 | KD2-H4K8la_peak_5549 | 7.19244  | PMS2P3_ENSG00000127957                             |
| 7 | 7.5E+07 | 7.5E+07 | KD2-H4K8la_peak_5550 | 7.33892  |                                                    |
| 7 | 7.5E+07 | 7.5E+07 | KD2-H4K8la_peak_5551 | 14.44261 | HIP1_ENSG00000127946                               |
| 7 | 7.6E+07 | 7.6E+07 | KD2-H4K8la_peak_5552 | 9.27415  |                                                    |
| 7 | 7.6E+07 | 7.6E+07 | KD2-H4K8la_peak_5553 | 6.35027  |                                                    |
| 7 | 7.6E+07 | 7.6E+07 | KD2-H4K8la_peak_5554 | 6.68593  |                                                    |
| 7 | 7.6E+07 | 7.6E+07 | KD2-H4K8la_peak_5555 | 11.04269 |                                                    |
| 7 | 7.6E+07 | 7.6E+07 | KD2-H4K8la_peak_5556 | 11.50321 |                                                    |
| 7 | 7.6E+07 | 7.6E+07 | KD2-H4K8la_peak_5557 | 7.94013  | HSPB1_ENSG00000106211                              |
| 7 | 7.6E+07 | 7.6E+07 | KD2-H4K8la_peak_5558 | 8.06101  |                                                    |
| 7 | 7.6E+07 | 7.6E+07 | KD2-H4K8la_peak_5559 | 11.94113 |                                                    |
| 7 | 7.6E+07 | 7.6E+07 | KD2-H4K8la_peak_5560 | 8.0333   |                                                    |
| 7 | 7.6E+07 | 7.6E+07 | KD2-H4K8la_peak_5561 | 9.92226  |                                                    |
| 7 | 7.6E+07 | 7.6E+07 | KD2-H4K8la_peak_5562 | 6.23074  |                                                    |
| 7 | 7.6E+07 | 7.6E+07 | KD2-H4K8la_peak_5563 | 9.44217  |                                                    |
| 7 | 7.6E+07 | 7.6E+07 | KD2-H4K8la_peak_5564 | 8.77936  | DTX2_ENSG00000091073                               |

|   |         |         |                      |          |                                                                              |
|---|---------|---------|----------------------|----------|------------------------------------------------------------------------------|
| 7 | 7.6E+07 | 7.6E+07 | KD2-H4K8la_peak_5565 | 6.18829  | UPK3B_ENSG00000243566                                                        |
| 7 | 7.6E+07 | 7.6E+07 | KD2-H4K8la_peak_5566 | 11.40266 | AC004980.7_ENSG00000205485                                                   |
| 7 | 7.7E+07 | 7.7E+07 | KD2-H4K8la_peak_5567 | 5.23773  | GSAP_ENSG00000186088;RP5-899E9.1_ENSG00000273341                             |
| 7 | 7.7E+07 | 7.7E+07 | KD2-H4K8la_peak_5568 | 6.57176  | RSBN1L-AS1_ENSG00000214293;RSBN1L_ENSG00000187257                            |
| 7 | 8.2E+07 | 8.2E+07 | KD2-H4K8la_peak_5569 | 11.57314 | CACNA2D1_ENSG00000153956                                                     |
| 7 | 8.4E+07 | 8.4E+07 | KD2-H4K8la_peak_5570 | 6.26214  |                                                                              |
| 7 | 8.5E+07 | 8.5E+07 | KD2-H4K8la_peak_5571 | 7.13237  |                                                                              |
| 7 | 8.7E+07 | 8.7E+07 | KD2-H4K8la_peak_5572 | 6.9399   | TMEM243_ENSG00000135185                                                      |
| 7 | 8.7E+07 | 8.7E+07 | KD2-H4K8la_peak_5573 | 6.64804  |                                                                              |
| 7 | 9E+07   | 9E+07   | KD2-H4K8la_peak_5574 | 5.99671  |                                                                              |
| 7 | 9.2E+07 | 9.2E+07 | KD2-H4K8la_peak_5575 | 6.13507  | MTERF_ENSG00000127989                                                        |
| 7 | 9.2E+07 | 9.2E+07 | KD2-H4K8la_peak_5576 | 5.8369   | CTB-161K23.1_ENSG00000188693                                                 |
| 7 | 9.2E+07 | 9.2E+07 | KD2-H4K8la_peak_5577 | 14.09647 | KRIT1_ENSG00000001631;ANKIB1_ENSG00000001629                                 |
| 7 | 9.2E+07 | 9.2E+07 | KD2-H4K8la_peak_5578 | 11.15747 | GATAD1_ENSG00000157259                                                       |
| 7 | 9.2E+07 | 9.2E+07 | KD2-H4K8la_peak_5579 | 9.40293  | GATAD1_ENSG00000157259                                                       |
| 7 | 9.2E+07 | 9.2E+07 | KD2-H4K8la_peak_5580 | 7.90495  |                                                                              |
| 7 | 9.2E+07 | 9.2E+07 | KD2-H4K8la_peak_5581 | 10.19807 |                                                                              |
| 7 | 9.2E+07 | 9.2E+07 | KD2-H4K8la_peak_5582 | 8.37064  |                                                                              |
| 7 | 9.4E+07 | 9.4E+07 | KD2-H4K8la_peak_5583 | 8.13557  | GNG11_ENSG00000127920                                                        |
| 7 | 9.4E+07 | 9.4E+07 | KD2-H4K8la_peak_5584 | 8.39919  | CASD1_ENSG00000127995                                                        |
| 7 | 9.4E+07 | 9.4E+07 | KD2-H4K8la_peak_5585 | 16.42606 |                                                                              |
| 7 | 9.4E+07 | 9.4E+07 | KD2-H4K8la_peak_5586 | 7.61975  | SGCE_ENSG00000127990;PEG10_ENSG00000242265                                   |
| 7 | 9.5E+07 | 9.5E+07 | KD2-H4K8la_peak_5587 | 7.3993   | PPP1R9A_ENSG00000158528                                                      |
| 7 | 9.6E+07 | 9.6E+07 | KD2-H4K8la_peak_5588 | 7.12308  | SLC25A13_ENSG00000004864                                                     |
| 7 | 9.7E+07 | 9.7E+07 | KD2-H4K8la_peak_5589 | 7.12972  |                                                                              |
| 7 | 9.7E+07 | 9.7E+07 | KD2-H4K8la_peak_5590 | 6.2278   |                                                                              |
| 7 | 9.8E+07 | 9.8E+07 | KD2-H4K8la_peak_5591 | 10.20357 | AC004967.7_ENSG00000243554                                                   |
| 7 | 9.8E+07 | 9.8E+07 | KD2-H4K8la_peak_5592 | 6.3399   | AC004967.7_ENSG00000243554                                                   |
| 7 | 9.8E+07 | 9.8E+07 | KD2-H4K8la_peak_5593 | 11.7362  | LMTK2_ENSG00000164715                                                        |
| 7 | 9.8E+07 | 9.8E+07 | KD2-H4K8la_peak_5594 | 8.03465  |                                                                              |
| 7 | 9.8E+07 | 9.8E+07 | KD2-H4K8la_peak_5595 | 9.78176  |                                                                              |
| 7 | 9.8E+07 | 9.8E+07 | KD2-H4K8la_peak_5596 | 7.3993   |                                                                              |
| 7 | 9.8E+07 | 9.8E+07 | KD2-H4K8la_peak_5597 | 7.61975  |                                                                              |
| 7 | 9.8E+07 | 9.8E+07 | KD2-H4K8la_peak_5598 | 10.49982 | NPTX2_ENSG00000106236                                                        |
| 7 | 9.8E+07 | 9.8E+07 | KD2-H4K8la_peak_5599 | 10.64143 | TRRAP_ENSG00000196367                                                        |
| 7 | 9.9E+07 | 9.9E+07 | KD2-H4K8la_peak_5600 | 11.15747 | SMURF1_ENSG00000198742                                                       |
| 7 | 9.9E+07 | 9.9E+07 | KD2-H4K8la_peak_5601 | 7.91061  | ARPC1A_ENSG00000241685                                                       |
| 7 | 9.9E+07 | 9.9E+07 | KD2-H4K8la_peak_5602 | 8.09203  | PDAP1_ENSG00000106244;BUD31_ENSG00000106245                                  |
| 7 | 9.9E+07 | 9.9E+07 | KD2-H4K8la_peak_5603 | 10.02595 | PTCD1_ENSG00000106246;ATP5J2-PTCD1_ENSG00000248919;ATP5J2_ENSG00000241468    |
| 7 | 9.9E+07 | 9.9E+07 | KD2-H4K8la_peak_5604 | 8.50453  |                                                                              |
| 7 | 9.9E+07 | 9.9E+07 | KD2-H4K8la_peak_5605 | 5.78862  | ZKSCAN5_ENSG00000196652                                                      |
| 7 | 9.9E+07 | 9.9E+07 | KD2-H4K8la_peak_5606 | 11.20341 | FAM200A_ENSG00000221909;ZNF655_ENSG00000197343;GS1-259H13.10_ENSG00000272647 |
| 7 | 9.9E+07 | 9.9E+07 | KD2-H4K8la_peak_5607 | 7.30491  |                                                                              |
| 7 | 9.9E+07 | 9.9E+07 | KD2-H4K8la_peak_5608 | 9.37943  | ZSCAN25_ENSG00000197037                                                      |
| 7 | 1E+08   | 1E+08   | KD2-H4K8la_peak_5609 | 21.96182 | ZSCAN21_ENSG00000166529                                                      |
| 7 | 1E+08   | 1E+08   | KD2-H4K8la_peak_5610 | 12.20736 | ZNF3_ENSG00000166526                                                         |

|   |         |         |                      |          |                                                                                     |
|---|---------|---------|----------------------|----------|-------------------------------------------------------------------------------------|
| 7 | 1E+08   | 1E+08   | KD2-H4K8la_peak_5611 | 6.47266  | MCM7_ENSG00000166508;AP4M1_ENSG00000221838                                          |
| 7 | 1E+08   | 1E+08   | KD2-H4K8la_peak_5612 | 9.36765  | RP11-506M12.1_ENSG00000242798;MBLAC1_ENSG00000214309                                |
| 7 | 1E+08   | 1E+08   | KD2-H4K8la_peak_5613 | 4.86896  |                                                                                     |
| 7 | 1E+08   | 1E+08   | KD2-H4K8la_peak_5614 | 7.12308  | ZCWPW1_ENSG00000078487;MEPCE_ENSG00000146834                                        |
| 7 | 1E+08   | 1E+08   | KD2-H4K8la_peak_5615 | 17.48572 | ZCWPW1_ENSG00000078487                                                              |
| 7 | 1E+08   | 1E+08   | KD2-H4K8la_peak_5616 | 13.95071 | RP11-758P17.2_ENSG00000241357;PPP1R35_ENSG00000160813;RP11-758P17.3_ENSG00000240211 |
| 7 | 1E+08   | 1E+08   | KD2-H4K8la_peak_5617 | 9.41838  | PPP1R35_ENSG00000160813;RP11-758P17.3_ENSG00000240211                               |
| 7 | 1E+08   | 1E+08   | KD2-H4K8la_peak_5618 | 9.78176  |                                                                                     |
| 7 | 1E+08   | 1E+08   | KD2-H4K8la_peak_5619 | 8.48577  |                                                                                     |
| 7 | 1E+08   | 1E+08   | KD2-H4K8la_peak_5620 | 5.22418  | RP11-44M6.3_ENSG00000184414                                                         |
| 7 | 1E+08   | 1E+08   | KD2-H4K8la_peak_5621 | 5.43278  | MOSPD3_ENSG00000106330                                                              |
| 7 | 1E+08   | 1E+08   | KD2-H4K8la_peak_5622 | 8.48488  | GNB2_ENSG00000172354                                                                |
| 7 | 1E+08   | 1E+08   | KD2-H4K8la_peak_5623 | 11.05839 |                                                                                     |
| 7 | 1E+08   | 1E+08   | KD2-H4K8la_peak_5624 | 7.88822  |                                                                                     |
| 7 | 1E+08   | 1E+08   | KD2-H4K8la_peak_5625 | 8.94106  | EPHB4_ENSG00000196411;SLC12A9_ENSG00000146828                                       |
| 7 | 1E+08   | 1E+08   | KD2-H4K8la_peak_5626 | 5.27164  | SRRT_ENSG00000087087                                                                |
| 7 | 1E+08   | 1E+08   | KD2-H4K8la_peak_5627 | 8.13557  | UFSP1_ENSG00000176125                                                               |
| 7 | 1E+08   | 1E+08   | KD2-H4K8la_peak_5628 | 10.16316 |                                                                                     |
| 7 | 1E+08   | 1E+08   | KD2-H4K8la_peak_5629 | 10.04113 | NAT16_ENSG00000167011                                                               |
| 7 | 1E+08   | 1E+08   | KD2-H4K8la_peak_5630 | 7.03956  |                                                                                     |
| 7 | 1E+08   | 1E+08   | KD2-H4K8la_peak_5631 | 6.12632  | RP11-132A1.4_ENSG00000232445                                                        |
| 7 | 1E+08   | 1E+08   | KD2-H4K8la_peak_5632 | 9.98668  |                                                                                     |
| 7 | 1E+08   | 1E+08   | KD2-H4K8la_peak_5633 | 4.30663  |                                                                                     |
| 7 | 1E+08   | 1E+08   | KD2-H4K8la_peak_5634 | 28.5812  |                                                                                     |
| 7 | 1E+08   | 1E+08   | KD2-H4K8la_peak_5635 | 10.00612 | PRKRIP1_ENSG00000128563;RP11-163E9.2_ENSG00000239969                                |
| 7 | 1E+08   | 1E+08   | KD2-H4K8la_peak_5636 | 7.77341  |                                                                                     |
| 7 | 1E+08   | 1E+08   | KD2-H4K8la_peak_5637 | 14.44261 | ORAI2_ENSG00000160991                                                               |
| 7 | 1E+08   | 1E+08   | KD2-H4K8la_peak_5638 | 12.33257 | ALKBH4_ENSG00000160993;LRWD1_ENSG00000161036                                        |
| 7 | 1E+08   | 1E+08   | KD2-H4K8la_peak_5639 | 7.68525  |                                                                                     |
| 7 | 1E+08   | 1E+08   | KD2-H4K8la_peak_5640 | 13.13367 |                                                                                     |
| 7 | 1E+08   | 1E+08   | KD2-H4K8la_peak_5641 | 9.61894  | DPY19L2P2_ENSG00000170629                                                           |
| 7 | 1E+08   | 1E+08   | KD2-H4K8la_peak_5642 | 12.32641 | DPY19L2P2_ENSG00000170629                                                           |
| 7 | 1E+08   | 1E+08   | KD2-H4K8la_peak_5643 | 9.92226  | DNAJC2_ENSG00000105821;PSMC2_ENSG00000161057                                        |
| 7 | 1E+08   | 1E+08   | KD2-H4K8la_peak_5644 | 8.03615  | SLC26A5_ENSG00000170615;CTB-107G13.1_ENSG00000234715                                |
| 7 | 1E+08   | 1E+08   | KD2-H4K8la_peak_5645 | 6.86458  |                                                                                     |
| 7 | 1E+08   | 1E+08   | KD2-H4K8la_peak_5646 | 6.35646  | RELN_ENSG00000189056                                                                |
| 7 | 1E+08   | 1E+08   | KD2-H4K8la_peak_5647 | 6.86458  | RP11-325F22.2_ENSG00000237513                                                       |
| 7 | 1E+08   | 1E+08   | KD2-H4K8la_peak_5648 | 7.84781  | LINC01004_ENSG00000228393;KMT2E-AS1_ENSG00000239569;KMT2E_ENSG00000005483           |
| 7 | 1.1E+08 | 1.1E+08 | KD2-H4K8la_peak_5649 | 10.59471 | SYPL1_ENSG00000008282                                                               |
| 7 | 1.1E+08 | 1.1E+08 | KD2-H4K8la_peak_5650 | 7.56395  | CTB-30L5.1_ENSG00000267052                                                          |
| 7 | 1.1E+08 | 1.1E+08 | KD2-H4K8la_peak_5651 | 4.6555   | CCDC71L_ENSG00000253276;AC004917.1_ENSG00000177820                                  |
| 7 | 1.1E+08 | 1.1E+08 | KD2-H4K8la_peak_5652 | 5.33301  | COG5_ENSG00000164597;DUS4L_ENSG00000105865                                          |
| 7 | 1.1E+08 | 1.1E+08 | KD2-H4K8la_peak_5653 | 7.23932  | RP4-593H12.1_ENSG00000272854;BCAP29_ENSG00000075790                                 |
| 7 | 1.1E+08 | 1.1E+08 | KD2-H4K8la_peak_5654 | 11.05785 |                                                                                     |
| 7 | 1.1E+08 | 1.1E+08 | KD2-H4K8la_peak_5655 | 7.59874  |                                                                                     |
| 7 | 1.1E+08 | 1.1E+08 | KD2-H4K8la_peak_5656 | 6.3399   |                                                                                     |

|   |         |         |                      |          |                                                                                   |
|---|---------|---------|----------------------|----------|-----------------------------------------------------------------------------------|
| 7 | 1.1E+08 | 1.1E+08 | KD2-H4K8la_peak_5657 | 6.89612  |                                                                                   |
| 7 | 1.1E+08 | 1.1E+08 | KD2-H4K8la_peak_5658 | 11.15182 |                                                                                   |
| 7 | 1.1E+08 | 1.1E+08 | KD2-H4K8la_peak_5659 | 10.0408  | C7orf60_ENSG00000164603                                                           |
| 7 | 1.1E+08 | 1.1E+08 | KD2-H4K8la_peak_5660 | 7.13237  |                                                                                   |
| 7 | 1.2E+08 | 1.2E+08 | KD2-H4K8la_peak_5661 | 10.31182 | ST7-AS1_ENSG00000227199;ST7_ENSG00000004866;ST7-OT4_ENSG00000214188               |
| 7 | 1.2E+08 | 1.2E+08 | KD2-H4K8la_peak_5662 | 9.61235  |                                                                                   |
| 7 | 1.2E+08 | 1.2E+08 | KD2-H4K8la_peak_5663 | 8.39813  | ANKRD7_ENSG00000106013                                                            |
| 7 | 1.2E+08 | 1.2E+08 | KD2-H4K8la_peak_5664 | 11.76151 | ANKRD7_ENSG00000106013                                                            |
| 7 | 1.2E+08 | 1.2E+08 | KD2-H4K8la_peak_5665 | 5.48079  |                                                                                   |
| 7 | 1.2E+08 | 1.2E+08 | KD2-H4K8la_peak_5666 | 16.54584 | TMEM229A_ENSG00000234224;RP5-921G16.1_ENSG00000242593                             |
| 7 | 1.2E+08 | 1.2E+08 | KD2-H4K8la_peak_5667 | 8.78491  |                                                                                   |
| 7 | 1.3E+08 | 1.3E+08 | KD2-H4K8la_peak_5668 | 6.75222  |                                                                                   |
| 7 | 1.3E+08 | 1.3E+08 | KD2-H4K8la_peak_5669 | 13.27013 | ARF5_ENSG00000004059                                                              |
| 7 | 1.3E+08 | 1.3E+08 | KD2-H4K8la_peak_5670 | 6.86458  | ARF5_ENSG00000004059                                                              |
| 7 | 1.3E+08 | 1.3E+08 | KD2-H4K8la_peak_5671 | 9.14592  |                                                                                   |
| 7 | 1.3E+08 | 1.3E+08 | KD2-H4K8la_peak_5672 | 13.12418 |                                                                                   |
| 7 | 1.3E+08 | 1.3E+08 | KD2-H4K8la_peak_5673 | 7.30491  |                                                                                   |
| 7 | 1.3E+08 | 1.3E+08 | KD2-H4K8la_peak_5674 | 8.66164  |                                                                                   |
| 7 | 1.3E+08 | 1.3E+08 | KD2-H4K8la_peak_5675 | 12.17279 | RP11-62J1.4_ENSG00000272915                                                       |
| 7 | 1.3E+08 | 1.3E+08 | KD2-H4K8la_peak_5676 | 6.94298  |                                                                                   |
| 7 | 1.3E+08 | 1.3E+08 | KD2-H4K8la_peak_5677 | 18.16096 |                                                                                   |
| 7 | 1.3E+08 | 1.3E+08 | KD2-H4K8la_peak_5678 | 13.97752 |                                                                                   |
| 7 | 1.3E+08 | 1.3E+08 | KD2-H4K8la_peak_5679 | 17.35808 | PRRT4_ENSG00000224940                                                             |
| 7 | 1.3E+08 | 1.3E+08 | KD2-H4K8la_peak_5680 | 7.3993   |                                                                                   |
| 7 | 1.3E+08 | 1.3E+08 | KD2-H4K8la_peak_5681 | 7.92775  |                                                                                   |
| 7 | 1.3E+08 | 1.3E+08 | KD2-H4K8la_peak_5682 | 6.12473  |                                                                                   |
| 7 | 1.3E+08 | 1.3E+08 | KD2-H4K8la_peak_5683 | 5.90392  |                                                                                   |
| 7 | 1.3E+08 | 1.3E+08 | KD2-H4K8la_peak_5684 | 7.52655  | RP11-212P7.3_ENSG00000273184;HILPDA_ENSG00000135245;RP11-155G14.6_ENSG00000240758 |
| 7 | 1.3E+08 | 1.3E+08 | KD2-H4K8la_peak_5685 | 5.43278  | METTL2B_ENSG00000165055                                                           |
| 7 | 1.3E+08 | 1.3E+08 | KD2-H4K8la_peak_5686 | 10.34952 | RP11-212P7.2_ENSG00000273270;RP11-274B21.1_ENSG00000242588                        |
| 7 | 1.3E+08 | 1.3E+08 | KD2-H4K8la_peak_5687 | 7.3993   |                                                                                   |
| 7 | 1.3E+08 | 1.3E+08 | KD2-H4K8la_peak_5688 | 9.38376  | RP11-309L24.2_ENSG00000242902;ATP6V1F_ENSG00000128524                             |
| 7 | 1.3E+08 | 1.3E+08 | KD2-H4K8la_peak_5689 | 7.79412  | IRF5_ENSG00000128604                                                              |
| 7 | 1.3E+08 | 1.3E+08 | KD2-H4K8la_peak_5690 | 11.52725 | TNPO3_ENSG00000064419;TPI1P2_ENSG00000230359                                      |
| 7 | 1.3E+08 | 1.3E+08 | KD2-H4K8la_peak_5691 | 8.62939  | SMO_ENSG00000128602                                                               |
| 7 | 1.3E+08 | 1.3E+08 | KD2-H4K8la_peak_5692 | 6.20793  | RP11-448A19.1_ENSG00000273329;NRF1_ENSG00000106459                                |
| 7 | 1.3E+08 | 1.3E+08 | KD2-H4K8la_peak_5693 | 5.99671  |                                                                                   |
| 7 | 1.3E+08 | 1.3E+08 | KD2-H4K8la_peak_5694 | 9.61894  |                                                                                   |
| 7 | 1.3E+08 | 1.3E+08 | KD2-H4K8la_peak_5695 | 8.7731   |                                                                                   |
| 7 | 1.3E+08 | 1.3E+08 | KD2-H4K8la_peak_5696 | 9.35473  | ZC3HC1_ENSG00000091732                                                            |
| 7 | 1.3E+08 | 1.3E+08 | KD2-H4K8la_peak_5697 | 6.64804  |                                                                                   |
| 7 | 1.3E+08 | 1.3E+08 | KD2-H4K8la_peak_5698 | 5.67596  |                                                                                   |
| 7 | 1.3E+08 | 1.3E+08 | KD2-H4K8la_peak_5699 | 7.92775  |                                                                                   |
| 7 | 1.3E+08 | 1.3E+08 | KD2-H4K8la_peak_5700 | 11.32969 | CPA1_ENSG00000091704                                                              |
| 7 | 1.3E+08 | 1.3E+08 | KD2-H4K8la_peak_5701 | 10.31182 |                                                                                   |
| 7 | 1.3E+08 | 1.3E+08 | KD2-H4K8la_peak_5702 | 12.35598 | LINC-PINT_ENSG00000231721;MKLN1_ENSG00000128585                                   |

|   |         |         |                      |          |                                                    |
|---|---------|---------|----------------------|----------|----------------------------------------------------|
| 7 | 1.3E+08 | 1.3E+08 | KD2-H4K8la_peak_5703 | 11.42932 | MKLN1-AS_ENSG00000236753                           |
| 7 | 1.3E+08 | 1.3E+08 | KD2-H4K8la_peak_5704 | 5.50657  |                                                    |
| 7 | 1.3E+08 | 1.3E+08 | KD2-H4K8la_peak_5705 | 13.27013 | PODXL_ENSG00000128567                              |
| 7 | 1.3E+08 | 1.3E+08 | KD2-H4K8la_peak_5706 | 7.77341  |                                                    |
| 7 | 1.3E+08 | 1.3E+08 | KD2-H4K8la_peak_5707 | 5.67596  |                                                    |
| 7 | 1.3E+08 | 1.3E+08 | KD2-H4K8la_peak_5708 | 5.33301  |                                                    |
| 7 | 1.3E+08 | 1.3E+08 | KD2-H4K8la_peak_5709 | 9.0413   |                                                    |
| 7 | 1.3E+08 | 1.3E+08 | KD2-H4K8la_peak_5710 | 5.41509  |                                                    |
| 7 | 1.3E+08 | 1.3E+08 | KD2-H4K8la_peak_5711 | 8.84474  |                                                    |
| 7 | 1.3E+08 | 1.3E+08 | KD2-H4K8la_peak_5712 | 4.62617  |                                                    |
| 7 | 1.3E+08 | 1.3E+08 | KD2-H4K8la_peak_5713 | 5.49688  |                                                    |
| 7 | 1.3E+08 | 1.3E+08 | KD2-H4K8la_peak_5714 | 5.33301  |                                                    |
| 7 | 1.3E+08 | 1.3E+08 | KD2-H4K8la_peak_5715 | 5.27164  |                                                    |
| 7 | 1.3E+08 | 1.3E+08 | KD2-H4K8la_peak_5716 | 6.47266  |                                                    |
| 7 | 1.3E+08 | 1.3E+08 | KD2-H4K8la_peak_5717 | 11.15747 |                                                    |
| 7 | 1.3E+08 | 1.3E+08 | KD2-H4K8la_peak_5718 | 8.944    | SLC35B4_ENSG00000205060                            |
| 7 | 1.3E+08 | 1.3E+08 | KD2-H4K8la_peak_5719 | 10.92814 | AKR1B1_ENSG00000085662                             |
| 7 | 1.3E+08 | 1.3E+08 | KD2-H4K8la_peak_5720 | 9.03222  | C7orf49_ENSG00000122783                            |
| 7 | 1.4E+08 | 1.4E+08 | KD2-H4K8la_peak_5721 | 6.76424  |                                                    |
| 7 | 1.4E+08 | 1.4E+08 | KD2-H4K8la_peak_5722 | 7.49467  |                                                    |
| 7 | 1.4E+08 | 1.4E+08 | KD2-H4K8la_peak_5723 | 10.65691 |                                                    |
| 7 | 1.4E+08 | 1.4E+08 | KD2-H4K8la_peak_5724 | 6.86458  |                                                    |
| 7 | 1.4E+08 | 1.4E+08 | KD2-H4K8la_peak_5725 | 8.0333   | KIAA1549_ENSG00000122778                           |
| 7 | 1.4E+08 | 1.4E+08 | KD2-H4K8la_peak_5726 | 7.30347  | ZC3HAV1_ENSG00000105939                            |
| 7 | 1.4E+08 | 1.4E+08 | KD2-H4K8la_peak_5727 | 10.70284 | LUC7L2_ENSG00000269955                             |
| 7 | 1.4E+08 | 1.4E+08 | KD2-H4K8la_peak_5728 | 5.49688  | RP11-634H22.1_ENSG00000273391                      |
| 7 | 1.4E+08 | 1.4E+08 | KD2-H4K8la_peak_5729 | 10.70284 | RP11-634H22.1_ENSG00000273391                      |
| 7 | 1.4E+08 | 1.4E+08 | KD2-H4K8la_peak_5730 | 6.64804  | HIPK2_ENSG00000064393;TBXAS1_ENSG00000059377       |
| 7 | 1.4E+08 | 1.4E+08 | KD2-H4K8la_peak_5731 | 10.37746 |                                                    |
| 7 | 1.4E+08 | 1.4E+08 | KD2-H4K8la_peak_5732 | 10.02595 |                                                    |
| 7 | 1.4E+08 | 1.4E+08 | KD2-H4K8la_peak_5733 | 8.78491  |                                                    |
| 7 | 1.4E+08 | 1.4E+08 | KD2-H4K8la_peak_5734 | 5.22616  | DENND2A_ENSG00000146966;ADCK2_ENSG00000133597      |
| 7 | 1.4E+08 | 1.4E+08 | KD2-H4K8la_peak_5735 | 6.86458  | NDUFB2-AS1_ENSG00000240889                         |
| 7 | 1.4E+08 | 1.4E+08 | KD2-H4K8la_peak_5736 | 12.32641 | BRAF_ENSG00000157764                               |
| 7 | 1.4E+08 | 1.4E+08 | KD2-H4K8la_peak_5737 | 8.7731   | MRPS33_ENSG00000090263                             |
| 7 | 1.4E+08 | 1.4E+08 | KD2-H4K8la_peak_5738 | 9.32091  |                                                    |
| 7 | 1.4E+08 | 1.4E+08 | KD2-H4K8la_peak_5739 | 12.97817 | RP11-744I24.2_ENSG00000261570;AGK_ENSG00000006530  |
| 7 | 1.4E+08 | 1.4E+08 | KD2-H4K8la_peak_5740 | 16.7435  | AC073342.12_ENSG00000231840;CASP2_ENSG00000106144  |
| 7 | 1.4E+08 | 1.4E+08 | KD2-H4K8la_peak_5741 | 6.85108  | AC093673.5_ENSG00000232533;ZYX_ENSG00000159840     |
| 7 | 1.4E+08 | 1.4E+08 | KD2-H4K8la_peak_5742 | 7.83588  | FAM115A_ENSG00000198420                            |
| 7 | 1.5E+08 | 1.5E+08 | KD2-H4K8la_peak_5743 | 7.72421  |                                                    |
| 7 | 1.5E+08 | 1.5E+08 | KD2-H4K8la_peak_5744 | 9.40293  | RP5-1136G13.2_ENSG00000273314;CUL1_ENSG00000055130 |
| 7 | 1.5E+08 | 1.5E+08 | KD2-H4K8la_peak_5745 | 8.89364  | RP5-1136G13.2_ENSG00000273314                      |
| 7 | 1.5E+08 | 1.5E+08 | KD2-H4K8la_peak_5746 | 8.73956  | EZH2_ENSG00000106462                               |
| 7 | 1.5E+08 | 1.5E+08 | KD2-H4K8la_peak_5747 | 5.58883  | RNY1_ENSG00000201098                               |
| 7 | 1.5E+08 | 1.5E+08 | KD2-H4K8la_peak_5748 | 10.94155 | ZNF786_ENSG00000197362                             |

|   |         |         |                      |          |                                                                         |
|---|---------|---------|----------------------|----------|-------------------------------------------------------------------------|
| 7 | 1.5E+08 | 1.5E+08 | KD2-H4K8la_peak_5749 | 12.73517 | ZNF425_ENSG00000204947;RN7SL521P_ENSG00000240877;ZNF398_ENSG00000197024 |
| 7 | 1.5E+08 | 1.5E+08 | KD2-H4K8la_peak_5750 | 7.94013  | ZNF425_ENSG00000204947;RN7SL521P_ENSG00000240877;ZNF398_ENSG00000197024 |
| 7 | 1.5E+08 | 1.5E+08 | KD2-H4K8la_peak_5751 | 7.3993   | ZNF282_ENSG00000170265                                                  |
| 7 | 1.5E+08 | 1.5E+08 | KD2-H4K8la_peak_5752 | 11.7362  | ZNF783_ENSG00000204946                                                  |
| 7 | 1.5E+08 | 1.5E+08 | KD2-H4K8la_peak_5753 | 9.03222  | ZNF783_ENSG00000204946                                                  |
| 7 | 1.5E+08 | 1.5E+08 | KD2-H4K8la_peak_5754 | 8.66164  | RP11-143I21.1_ENSG00000261842                                           |
| 7 | 1.5E+08 | 1.5E+08 | KD2-H4K8la_peak_5755 | 4.75945  | RP11-143I21.1_ENSG00000261842                                           |
| 7 | 1.5E+08 | 1.5E+08 | KD2-H4K8la_peak_5756 | 9.44217  |                                                                         |
| 7 | 1.5E+08 | 1.5E+08 | KD2-H4K8la_peak_5757 | 10.87112 | ZNF746_ENSG00000181220                                                  |
| 7 | 1.5E+08 | 1.5E+08 | KD2-H4K8la_peak_5758 | 9.20163  | ZNF767_ENSG00000133624                                                  |
| 7 | 1.5E+08 | 1.5E+08 | KD2-H4K8la_peak_5759 | 5.83285  |                                                                         |
| 7 | 1.5E+08 | 1.5E+08 | KD2-H4K8la_peak_5760 | 13.85062 | ZNF862_ENSG00000106479                                                  |
| 7 | 1.5E+08 | 1.5E+08 | KD2-H4K8la_peak_5761 | 6.27787  | REPIN1_ENSG00000214022;ZNF775_ENSG00000196456                           |
| 7 | 1.5E+08 | 1.5E+08 | KD2-H4K8la_peak_5762 | 6.86458  | REPIN1_ENSG00000214022;ZNF775_ENSG00000196456                           |
| 7 | 1.5E+08 | 1.5E+08 | KD2-H4K8la_peak_5763 | 7.13528  |                                                                         |
| 7 | 1.5E+08 | 1.5E+08 | KD2-H4K8la_peak_5764 | 10.16316 |                                                                         |
| 7 | 1.5E+08 | 1.5E+08 | KD2-H4K8la_peak_5765 | 12.32641 |                                                                         |
| 7 | 1.5E+08 | 1.5E+08 | KD2-H4K8la_peak_5766 | 11.42772 |                                                                         |
| 7 | 1.5E+08 | 1.5E+08 | KD2-H4K8la_peak_5767 | 9.29421  |                                                                         |
| 7 | 1.5E+08 | 1.5E+08 | KD2-H4K8la_peak_5768 | 10.12872 |                                                                         |
| 7 | 1.5E+08 | 1.5E+08 | KD2-H4K8la_peak_5769 | 10.58805 |                                                                         |
| 7 | 1.5E+08 | 1.5E+08 | KD2-H4K8la_peak_5770 | 4.68264  |                                                                         |
| 7 | 1.5E+08 | 1.5E+08 | KD2-H4K8la_peak_5771 | 11.40102 |                                                                         |
| 7 | 1.5E+08 | 1.5E+08 | KD2-H4K8la_peak_5772 | 6.86458  |                                                                         |
| 7 | 1.5E+08 | 1.5E+08 | KD2-H4K8la_peak_5773 | 6.65787  |                                                                         |
| 7 | 1.5E+08 | 1.5E+08 | KD2-H4K8la_peak_5774 | 8.33415  | CDK5_ENSG00000164885                                                    |
| 7 | 1.5E+08 | 1.5E+08 | KD2-H4K8la_peak_5775 | 6.23074  | FASTK_ENSG00000164896                                                   |
| 7 | 1.5E+08 | 1.5E+08 | KD2-H4K8la_peak_5776 | 6.4136   | FASTK_ENSG00000164896                                                   |
| 7 | 1.5E+08 | 1.5E+08 | KD2-H4K8la_peak_5777 | 12.72886 | ABCF2_ENSG00000033050                                                   |
| 7 | 1.5E+08 | 1.5E+08 | KD2-H4K8la_peak_5778 | 8.39919  |                                                                         |
| 7 | 1.5E+08 | 1.5E+08 | KD2-H4K8la_peak_5779 | 13.27013 |                                                                         |
| 7 | 1.5E+08 | 1.5E+08 | KD2-H4K8la_peak_5780 | 14.09647 |                                                                         |
| 7 | 1.5E+08 | 1.5E+08 | KD2-H4K8la_peak_5781 | 4.66473  | SMARCD3_ENSG00000082014                                                 |
| 7 | 1.5E+08 | 1.5E+08 | KD2-H4K8la_peak_5782 | 12.73517 | NUB1_ENSG00000013374                                                    |
| 7 | 1.5E+08 | 1.5E+08 | KD2-H4K8la_peak_5783 | 12.32641 | WDR86_ENSG00000187260;WDR86-AS1_ENSG00000243836                         |
| 7 | 1.5E+08 | 1.5E+08 | KD2-H4K8la_peak_5784 | 14.7348  | RHEB_ENSG00000106615                                                    |
| 7 | 1.5E+08 | 1.5E+08 | KD2-H4K8la_peak_5785 | 8.15454  |                                                                         |
| 7 | 1.5E+08 | 1.5E+08 | KD2-H4K8la_peak_5786 | 7.0396   | PRKAG2_ENSG00000106617;PRKAG2-AS1_ENSG00000239911                       |
| 7 | 1.5E+08 | 1.5E+08 | KD2-H4K8la_peak_5787 | 10.02595 | GALNT11_ENSG00000178234                                                 |
| 7 | 1.5E+08 | 1.5E+08 | KD2-H4K8la_peak_5788 | 10.87112 | GALNT11_ENSG00000178234                                                 |
| 7 | 1.5E+08 | 1.5E+08 | KD2-H4K8la_peak_5789 | 7.09232  |                                                                         |
| 7 | 1.5E+08 | 1.5E+08 | KD2-H4K8la_peak_5790 | 9.03222  | LINC01003_ENSG00000261455                                               |
| 7 | 1.5E+08 | 1.5E+08 | KD2-H4K8la_peak_5791 | 7.06427  |                                                                         |
| 7 | 1.5E+08 | 1.5E+08 | KD2-H4K8la_peak_5792 | 5.8369   | ACTR3B_ENSG00000133627                                                  |
| 7 | 1.5E+08 | 1.5E+08 | KD2-H4K8la_peak_5793 | 7.62867  |                                                                         |
| 7 | 1.5E+08 | 1.5E+08 | KD2-H4K8la_peak_5794 | 17.48572 | PAXIP1_ENSG00000157212;PAXIP1-AS1_ENSG00000273344                       |

|   |         |         |                      |          |                                                                                              |
|---|---------|---------|----------------------|----------|----------------------------------------------------------------------------------------------|
| 7 | 1.6E+08 | 1.6E+08 | KD2-H4K8la_peak_5795 | 5.33301  |                                                                                              |
| 7 | 1.6E+08 | 1.6E+08 | KD2-H4K8la_peak_5796 | 11.14458 |                                                                                              |
| 7 | 1.6E+08 | 1.6E+08 | KD2-H4K8la_peak_5797 | 16.57672 | AC144652.1_ENSG00000273117;INSIG1_ENSG00000186480                                            |
| 7 | 1.6E+08 | 1.6E+08 | KD2-H4K8la_peak_5798 | 7.11805  |                                                                                              |
| 7 | 1.6E+08 | 1.6E+08 | KD2-H4K8la_peak_5799 | 9.40293  | AC009403.2_ENSG00000216895;RBM33_ENSG00000184863                                             |
| 7 | 1.6E+08 | 1.6E+08 | KD2-H4K8la_peak_5800 | 10.00612 |                                                                                              |
| 7 | 1.6E+08 | 1.6E+08 | KD2-H4K8la_peak_5801 | 39.15503 | LINC01006_ENSG00000182648;C7orf13_ENSG00000244291;RNF32_ENSG00000105982                      |
| 7 | 1.6E+08 | 1.6E+08 | KD2-H4K8la_peak_5802 | 8.66164  | LINC01006_ENSG00000182648;C7orf13_ENSG00000244291;RNF32_ENSG00000105982                      |
| 7 | 1.6E+08 | 1.6E+08 | KD2-H4K8la_peak_5803 | 8.37064  |                                                                                              |
| 7 | 1.6E+08 | 1.6E+08 | KD2-H4K8la_peak_5804 | 8.76116  | LMBR1_ENSG00000105983                                                                        |
| 7 | 1.6E+08 | 1.6E+08 | KD2-H4K8la_peak_5805 | 5.99671  | NOM1_ENSG00000146909                                                                         |
| 7 | 1.6E+08 | 1.6E+08 | KD2-H4K8la_peak_5806 | 8.41487  |                                                                                              |
| 7 | 1.6E+08 | 1.6E+08 | KD2-H4K8la_peak_5807 | 8.80749  | DNAJB6_ENSG00000105993                                                                       |
| 7 | 1.6E+08 | 1.6E+08 | KD2-H4K8la_peak_5808 | 5.16795  |                                                                                              |
| 7 | 1.6E+08 | 1.6E+08 | KD2-H4K8la_peak_5809 | 5.33721  |                                                                                              |
| 7 | 1.6E+08 | 1.6E+08 | KD2-H4K8la_peak_5810 | 8.13557  |                                                                                              |
| 7 | 1.6E+08 | 1.6E+08 | KD2-H4K8la_peak_5811 | 4.85784  |                                                                                              |
| 8 | 182579  | 182777  | KD2-H4K8la_peak_5812 | 9.05604  | RPL23AP53_ENSG00000223508;ZNF596_ENSG00000172748;RP5-855D21.3_ENSG00000272812                |
| 8 | 340874  | 341120  | KD2-H4K8la_peak_5813 | 8.46409  |                                                                                              |
| 8 | 1104689 | 1105065 | KD2-H4K8la_peak_5814 | 5.83285  |                                                                                              |
| 8 | 1202940 | 1203368 | KD2-H4K8la_peak_5815 | 6.70626  |                                                                                              |
| 8 | 1501156 | 1501363 | KD2-H4K8la_peak_5816 | 6.26214  |                                                                                              |
| 8 | 1712023 | 1712336 | KD2-H4K8la_peak_5817 | 12.11492 | CTD-2336O2.1_ENSG00000253982                                                                 |
| 8 | 6263263 | 6263879 | KD2-H4K8la_peak_5818 | 10.20357 | RP11-115C21.2_ENSG00000246089;MCPH1_ENSG00000147316                                          |
| 8 | 6407952 | 6408198 | KD2-H4K8la_peak_5819 | 7.51014  |                                                                                              |
| 8 | 7212384 | 7212801 | KD2-H4K8la_peak_5820 | 10.66741 | FAM66B_ENSG00000215374                                                                       |
| 8 | 8559629 | 8559873 | KD2-H4K8la_peak_5821 | 7.3993   | CLDN23_ENSG00000253958;AC087269.1_ENSG00000176305                                            |
| 8 | 8750591 | 8751063 | KD2-H4K8la_peak_5822 | 7.81267  | MFHAS1_ENSG00000147324                                                                       |
| 8 | 9041307 | 9041509 | KD2-H4K8la_peak_5823 | 6.25288  |                                                                                              |
| 8 | 9057728 | 9057955 | KD2-H4K8la_peak_5824 | 6.70626  |                                                                                              |
| 8 | 9413496 | 9414001 | KD2-H4K8la_peak_5825 | 8.13557  | RP11-375N15.2_ENSG00000272267;TNKS_ENSG00000173273                                           |
| 8 | 1E+07   | 1E+07   | KD2-H4K8la_peak_5826 | 10.70061 |                                                                                              |
| 8 | 1.1E+07 | 1.1E+07 | KD2-H4K8la_peak_5827 | 7.12497  | CTD-2135J3.3_ENSG00000248896                                                                 |
| 8 | 1.1E+07 | 1.1E+07 | KD2-H4K8la_peak_5828 | 6.57319  | SOX7_ENSG00000171056;SOX7_ENSG00000258724;PINX1_ENSG00000254093;RP11-177H2.2_ENSG00000253695 |
| 8 | 1.1E+07 | 1.1E+07 | KD2-H4K8la_peak_5829 | 8.15906  |                                                                                              |
| 8 | 1.1E+07 | 1.1E+07 | KD2-H4K8la_peak_5830 | 6.64804  | XKR6_ENSG00000171044                                                                         |
| 8 | 1.1E+07 | 1.1E+07 | KD2-H4K8la_peak_5831 | 4.69635  |                                                                                              |
| 8 | 1.1E+07 | 1.1E+07 | KD2-H4K8la_peak_5832 | 5.05146  |                                                                                              |
| 8 | 1.1E+07 | 1.1E+07 | KD2-H4K8la_peak_5833 | 7.13528  |                                                                                              |
| 8 | 1.1E+07 | 1.1E+07 | KD2-H4K8la_peak_5834 | 12.85404 |                                                                                              |
| 8 | 1.3E+07 | 1.3E+07 | KD2-H4K8la_peak_5835 | 12.03353 | LONRF1_ENSG00000154359                                                                       |
| 8 | 1.5E+07 | 1.5E+07 | KD2-H4K8la_peak_5836 | 10.02595 |                                                                                              |
| 8 | 1.8E+07 | 1.8E+07 | KD2-H4K8la_peak_5837 | 11.06859 |                                                                                              |
| 8 | 1.9E+07 | 1.9E+07 | KD2-H4K8la_peak_5838 | 13.63983 |                                                                                              |
| 8 | 2E+07   | 2E+07   | KD2-H4K8la_peak_5839 | 8.13727  |                                                                                              |
| 8 | 2.2E+07 | 2.2E+07 | KD2-H4K8la_peak_5840 | 9.1923   |                                                                                              |

|   |         |         |                      |          |                                                       |
|---|---------|---------|----------------------|----------|-------------------------------------------------------|
| 8 | 2.2E+07 | 2.2E+07 | KD2-H4K8la_peak_5841 | 7.12014  |                                                       |
| 8 | 2.2E+07 | 2.2E+07 | KD2-H4K8la_peak_5842 | 5.43278  |                                                       |
| 8 | 2.2E+07 | 2.2E+07 | KD2-H4K8la_peak_5843 | 8.73956  |                                                       |
| 8 | 2.2E+07 | 2.2E+07 | KD2-H4K8la_peak_5844 | 4.75945  |                                                       |
| 8 | 2.2E+07 | 2.2E+07 | KD2-H4K8la_peak_5845 | 9.27415  |                                                       |
| 8 | 2.2E+07 | 2.2E+07 | KD2-H4K8la_peak_5846 | 5.83285  | NUDT18_ENSG00000173566                                |
| 8 | 2.2E+07 | 2.2E+07 | KD2-H4K8la_peak_5847 | 6.61963  | HR_ENSG00000168453                                    |
| 8 | 2.2E+07 | 2.2E+07 | KD2-H4K8la_peak_5848 | 5.24865  |                                                       |
| 8 | 2.2E+07 | 2.2E+07 | KD2-H4K8la_peak_5849 | 8.73956  |                                                       |
| 8 | 2.2E+07 | 2.2E+07 | KD2-H4K8la_peak_5850 | 8.07102  | PPP3CC_ENSG00000120910                                |
| 8 | 2.2E+07 | 2.2E+07 | KD2-H4K8la_peak_5851 | 9.38376  | C8orf58_ENSG00000241852                               |
| 8 | 2.2E+07 | 2.2E+07 | KD2-H4K8la_peak_5852 | 9.68194  | CCAR2_ENSG00000158941                                 |
| 8 | 2.2E+07 | 2.2E+07 | KD2-H4K8la_peak_5853 | 9.68194  | CCAR2_ENSG00000158941                                 |
| 8 | 2.3E+07 | 2.3E+07 | KD2-H4K8la_peak_5854 | 6.96161  |                                                       |
| 8 | 2.3E+07 | 2.3E+07 | KD2-H4K8la_peak_5855 | 7.47988  |                                                       |
| 8 | 2.3E+07 | 2.3E+07 | KD2-H4K8la_peak_5856 | 8.07102  |                                                       |
| 8 | 2.3E+07 | 2.3E+07 | KD2-H4K8la_peak_5857 | 6.3399   | RP11-177H13.2_ENSG00000253837                         |
| 8 | 2.3E+07 | 2.3E+07 | KD2-H4K8la_peak_5858 | 5.98775  |                                                       |
| 8 | 2.5E+07 | 2.5E+07 | KD2-H4K8la_peak_5859 | 7.19298  | DOCK5_ENSG00000147459                                 |
| 8 | 2.6E+07 | 2.6E+07 | KD2-H4K8la_peak_5860 | 6.3399   |                                                       |
| 8 | 2.6E+07 | 2.6E+07 | KD2-H4K8la_peak_5861 | 6.04152  |                                                       |
| 8 | 2.7E+07 | 2.7E+07 | KD2-H4K8la_peak_5862 | 9.0413   | SCARA3_ENSG00000168077                                |
| 8 | 2.8E+07 | 2.8E+07 | KD2-H4K8la_peak_5863 | 5.83285  |                                                       |
| 8 | 2.8E+07 | 2.8E+07 | KD2-H4K8la_peak_5864 | 5.09794  |                                                       |
| 8 | 2.8E+07 | 2.8E+07 | KD2-H4K8la_peak_5865 | 6.0136   |                                                       |
| 8 | 2.8E+07 | 2.8E+07 | KD2-H4K8la_peak_5866 | 7.96951  |                                                       |
| 8 | 2.8E+07 | 2.8E+07 | KD2-H4K8la_peak_5867 | 10.52788 | ZNF395_ENSG00000186918                                |
| 8 | 2.9E+07 | 2.9E+07 | KD2-H4K8la_peak_5868 | 5.6165   |                                                       |
| 8 | 2.9E+07 | 2.9E+07 | KD2-H4K8la_peak_5869 | 9.68194  |                                                       |
| 8 | 2.9E+07 | 2.9E+07 | KD2-H4K8la_peak_5870 | 5.52913  | INTS9_ENSG00000104299;HMBOX1_ENSG00000147421          |
| 8 | 2.9E+07 | 2.9E+07 | KD2-H4K8la_peak_5871 | 4.86896  |                                                       |
| 8 | 2.9E+07 | 2.9E+07 | KD2-H4K8la_peak_5872 | 5.05146  | DUSP4_ENSG00000120875                                 |
| 8 | 2.9E+07 | 2.9E+07 | KD2-H4K8la_peak_5873 | 7.19298  |                                                       |
| 8 | 3E+07   | 3E+07   | KD2-H4K8la_peak_5874 | 8.4393   |                                                       |
| 8 | 3E+07   | 3E+07   | KD2-H4K8la_peak_5875 | 11.25405 |                                                       |
| 8 | 3E+07   | 3E+07   | KD2-H4K8la_peak_5876 | 5.98303  |                                                       |
| 8 | 3E+07   | 3E+07   | KD2-H4K8la_peak_5877 | 7.51302  |                                                       |
| 8 | 3E+07   | 3E+07   | KD2-H4K8la_peak_5878 | 8.48577  | LEPROTL1_ENSG00000104660                              |
| 8 | 3.1E+07 | 3.1E+07 | KD2-H4K8la_peak_5879 | 11.06859 |                                                       |
| 8 | 3.8E+07 | 3.8E+07 | KD2-H4K8la_peak_5880 | 4.75924  |                                                       |
| 8 | 3.8E+07 | 3.8E+07 | KD2-H4K8la_peak_5881 | 9.05604  |                                                       |
| 8 | 3.8E+07 | 3.8E+07 | KD2-H4K8la_peak_5882 | 9.77334  |                                                       |
| 8 | 3.8E+07 | 3.8E+07 | KD2-H4K8la_peak_5883 | 10.74378 | LSM1_ENSG00000175324;BAG4_ENSG00000156735             |
| 8 | 3.8E+07 | 3.8E+07 | KD2-H4K8la_peak_5884 | 6.96161  | WHSC1L1_ENSG00000147548;RP11-350N15.5_ENSG00000272092 |
| 8 | 3.8E+07 | 3.8E+07 | KD2-H4K8la_peak_5885 | 8.13727  | C8orf86_ENSG00000196166                               |
| 8 | 3.9E+07 | 3.9E+07 | KD2-H4K8la_peak_5886 | 8.08223  |                                                       |



|   |         |         |                      |          |                                                                                |
|---|---------|---------|----------------------|----------|--------------------------------------------------------------------------------|
| 8 | 3.9E+07 | 3.9E+07 | KD2-H4K8la_peak_5887 | 7.92775  |                                                                                |
| 8 | 3.9E+07 | 3.9E+07 | KD2-H4K8la_peak_5888 | 9.44217  |                                                                                |
| 8 | 3.9E+07 | 3.9E+07 | KD2-H4K8la_peak_5889 | 5.83285  |                                                                                |
| 8 | 3.9E+07 | 3.9E+07 | KD2-H4K8la_peak_5890 | 8.76082  |                                                                                |
| 8 | 4.1E+07 | 4.1E+07 | KD2-H4K8la_peak_5891 | 7.41438  | GIN54_ENSG00000147536                                                          |
| 8 | 4.1E+07 | 4.1E+07 | KD2-H4K8la_peak_5892 | 10.23822 | RP11-360L9.7_ENSG00000253174                                                   |
| 8 | 4.2E+07 | 4.2E+07 | KD2-H4K8la_peak_5893 | 8.73956  | RP11-231D20.2_ENSG00000253408;IKBKB_ENSG00000104365                            |
| 8 | 4.3E+07 | 4.3E+07 | KD2-H4K8la_peak_5894 | 11.40266 | POMK_ENSG00000185900                                                           |
| 8 | 4.3E+07 | 4.3E+07 | KD2-H4K8la_peak_5895 | 5.58883  | HGSNAT_ENSG00000165102                                                         |
| 8 | 4.8E+07 | 4.8E+07 | KD2-H4K8la_peak_5896 | 15.50085 | SPIDR_ENSG00000164808                                                          |
| 8 | 4.9E+07 | 4.9E+07 | KD2-H4K8la_peak_5897 | 9.73848  |                                                                                |
| 8 | 5.5E+07 | 5.5E+07 | KD2-H4K8la_peak_5898 | 6.2278   |                                                                                |
| 8 | 5.5E+07 | 5.5E+07 | KD2-H4K8la_peak_5899 | 7.22716  |                                                                                |
| 8 | 5.5E+07 | 5.5E+07 | KD2-H4K8la_peak_5900 | 5.05146  |                                                                                |
| 8 | 5.7E+07 | 5.7E+07 | KD2-H4K8la_peak_5901 | 9.6708   | LYN_ENSG00000254087                                                            |
| 8 | 5.7E+07 | 5.7E+07 | KD2-H4K8la_peak_5902 | 6.2278   |                                                                                |
| 8 | 5.7E+07 | 5.7E+07 | KD2-H4K8la_peak_5903 | 5.30989  |                                                                                |
| 8 | 5.7E+07 | 5.7E+07 | KD2-H4K8la_peak_5904 | 4.86896  |                                                                                |
| 8 | 5.9E+07 | 5.9E+07 | KD2-H4K8la_peak_5905 | 6.83387  |                                                                                |
| 8 | 5.9E+07 | 5.9E+07 | KD2-H4K8la_peak_5906 | 5.83285  | UBXN2B_ENSG00000215114                                                         |
| 8 | 6E+07   | 6E+07   | KD2-H4K8la_peak_5907 | 10.04111 | NSMAF_ENSG00000035681                                                          |
| 8 | 6E+07   | 6E+07   | KD2-H4K8la_peak_5908 | 7.51014  | TOX_ENSG00000198846;RP11-25K19.1_ENSG00000167912                               |
| 8 | 6.2E+07 | 6.2E+07 | KD2-H4K8la_peak_5909 | 7.55141  | AC022182.1_ENSG00000254777                                                     |
| 8 | 6.2E+07 | 6.2E+07 | KD2-H4K8la_peak_5910 | 4.75945  |                                                                                |
| 8 | 6.4E+07 | 6.4E+07 | KD2-H4K8la_peak_5911 | 16.69189 | YTHDF3-AS1_ENSG00000270673;YTHDF3_ENSG00000185728                              |
| 8 | 6.8E+07 | 6.8E+07 | KD2-H4K8la_peak_5912 | 5.83285  | ARFGF1_ENSG00000066777;RP11-7F18.2_ENSG00000271966                             |
| 8 | 7.6E+07 | 7.6E+07 | KD2-H4K8la_peak_5913 | 8.23729  | CASC9_ENSG00000249395                                                          |
| 8 | 8E+07   | 8E+07   | KD2-H4K8la_peak_5914 | 6.57319  |                                                                                |
| 8 | 8E+07   | 8E+07   | KD2-H4K8la_peak_5915 | 6.70626  |                                                                                |
| 8 | 8.1E+07 | 8.1E+07 | KD2-H4K8la_peak_5916 | 5.05917  |                                                                                |
| 8 | 8.1E+07 | 8.1E+07 | KD2-H4K8la_peak_5917 | 5.28047  |                                                                                |
| 8 | 8.1E+07 | 8.1E+07 | KD2-H4K8la_peak_5918 | 6.13507  |                                                                                |
| 8 | 8.2E+07 | 8.2E+07 | KD2-H4K8la_peak_5919 | 6.61963  |                                                                                |
| 8 | 8.2E+07 | 8.2E+07 | KD2-H4K8la_peak_5920 | 6.3399   |                                                                                |
| 8 | 8.2E+07 | 8.2E+07 | KD2-H4K8la_peak_5921 | 7.49467  |                                                                                |
| 8 | 8.2E+07 | 8.2E+07 | KD2-H4K8la_peak_5922 | 5.05146  |                                                                                |
| 8 | 8.2E+07 | 8.2E+07 | KD2-H4K8la_peak_5923 | 7.13237  | RP11-363E6.3_ENSG00000254027;FABP5_ENSG00000164687                             |
| 8 | 8.3E+07 | 8.3E+07 | KD2-H4K8la_peak_5924 | 15.75402 |                                                                                |
| 8 | 8.6E+07 | 8.6E+07 | KD2-H4K8la_peak_5925 | 5.05146  | RP11-219B4.7_ENSG00000260493;E2F5_ENSG00000133740;RP11-219B4.3_ENSG00000254208 |
| 8 | 9.1E+07 | 9.1E+07 | KD2-H4K8la_peak_5926 | 11.15747 |                                                                                |
| 8 | 9.2E+07 | 9.2E+07 | KD2-H4K8la_peak_5927 | 10.34978 | C8orf88_ENSG00000253250                                                        |
| 8 | 9.5E+07 | 9.5E+07 | KD2-H4K8la_peak_5928 | 7.13237  | LINC00535_ENSG00000246662                                                      |
| 8 | 9.5E+07 | 9.5E+07 | KD2-H4K8la_peak_5929 | 21.43197 |                                                                                |
| 8 | 9.8E+07 | 9.8E+07 | KD2-H4K8la_peak_5930 | 4.53273  |                                                                                |
| 8 | 9.8E+07 | 9.8E+07 | KD2-H4K8la_peak_5931 | 6.41605  | TSPYL5_ENSG00000180543                                                         |
| 8 | 9.9E+07 | 9.9E+07 | KD2-H4K8la_peak_5932 | 5.40949  | MTDH_ENSG00000147649                                                           |

|   |         |         |                      |          |                                                       |
|---|---------|---------|----------------------|----------|-------------------------------------------------------|
| 8 | 9.9E+07 | 9.9E+07 | KD2-H4K8la_peak_5933 | 8.62669  |                                                       |
| 8 | 9.9E+07 | 9.9E+07 | KD2-H4K8la_peak_5934 | 6.13507  |                                                       |
| 8 | 9.9E+07 | 9.9E+07 | KD2-H4K8la_peak_5935 | 5.58883  |                                                       |
| 8 | 1E+08   | 1E+08   | KD2-H4K8la_peak_5936 | 4.30663  |                                                       |
| 8 | 1E+08   | 1E+08   | KD2-H4K8la_peak_5937 | 12.65422 |                                                       |
| 8 | 1E+08   | 1E+08   | KD2-H4K8la_peak_5938 | 6.28277  |                                                       |
| 8 | 1E+08   | 1E+08   | KD2-H4K8la_peak_5939 | 7.22716  | ANKRD46_ENSG00000186106                               |
| 8 | 1E+08   | 1E+08   | KD2-H4K8la_peak_5940 | 8.07102  |                                                       |
| 8 | 1E+08   | 1E+08   | KD2-H4K8la_peak_5941 | 6.64804  |                                                       |
| 8 | 1E+08   | 1E+08   | KD2-H4K8la_peak_5942 | 6.40658  |                                                       |
| 8 | 1E+08   | 1E+08   | KD2-H4K8la_peak_5943 | 7.3993   | KB-1460A1.1_ENSG00000253395                           |
| 8 | 1E+08   | 1E+08   | KD2-H4K8la_peak_5944 | 7.13237  | UBR5_ENSG00000104517                                  |
| 8 | 1E+08   | 1E+08   | KD2-H4K8la_peak_5945 | 8.16787  | KLF10_ENSG00000155090                                 |
| 8 | 1E+08   | 1E+08   | KD2-H4K8la_peak_5946 | 5.58883  |                                                       |
| 8 | 1E+08   | 1E+08   | KD2-H4K8la_peak_5947 | 8.56099  |                                                       |
| 8 | 1E+08   | 1E+08   | KD2-H4K8la_peak_5948 | 7.90495  | KB-1732A1.1_ENSG00000253669                           |
| 8 | 1E+08   | 1E+08   | KD2-H4K8la_peak_5949 | 7.12014  |                                                       |
| 8 | 1E+08   | 1E+08   | KD2-H4K8la_peak_5950 | 7.8597   | CTHRC1_ENSG00000164932                                |
| 8 | 1.2E+08 | 1.2E+08 | KD2-H4K8la_peak_5951 | 4.30663  |                                                       |
| 8 | 1.2E+08 | 1.2E+08 | KD2-H4K8la_peak_5952 | 8.07102  | EIF3H_ENSG00000147677;UTP23_ENSG00000147679           |
| 8 | 1.2E+08 | 1.2E+08 | KD2-H4K8la_peak_5953 | 6.95423  | DERL1_ENSG00000136986;TBC1D31_ENSG00000156787         |
| 8 | 1.3E+08 | 1.3E+08 | KD2-H4K8la_peak_5954 | 8.67242  |                                                       |
| 8 | 1.3E+08 | 1.3E+08 | KD2-H4K8la_peak_5955 | 11.15747 | RP11-473O4.3_ENSG00000253720                          |
| 8 | 1.3E+08 | 1.3E+08 | KD2-H4K8la_peak_5956 | 9.72904  | RP11-473O4.3_ENSG00000253720                          |
| 8 | 1.3E+08 | 1.3E+08 | KD2-H4K8la_peak_5957 | 10.07718 |                                                       |
| 8 | 1.4E+08 | 1.4E+08 | KD2-H4K8la_peak_5958 | 7.49467  | ZFAT_ENSG00000066827                                  |
| 8 | 1.4E+08 | 1.4E+08 | KD2-H4K8la_peak_5959 | 15.56048 |                                                       |
| 8 | 1.4E+08 | 1.4E+08 | KD2-H4K8la_peak_5960 | 5.93538  |                                                       |
| 8 | 1.4E+08 | 1.4E+08 | KD2-H4K8la_peak_5961 | 6.92098  |                                                       |
| 8 | 1.4E+08 | 1.4E+08 | KD2-H4K8la_peak_5962 | 6.86458  | CHRC1_ENSG00000104472                                 |
| 8 | 1.4E+08 | 1.4E+08 | KD2-H4K8la_peak_5963 | 6.22733  | AGO2_ENSG00000123908                                  |
| 8 | 1.4E+08 | 1.4E+08 | KD2-H4K8la_peak_5964 | 9.59371  |                                                       |
| 8 | 1.4E+08 | 1.4E+08 | KD2-H4K8la_peak_5965 | 9.06396  |                                                       |
| 8 | 1.4E+08 | 1.4E+08 | KD2-H4K8la_peak_5966 | 9.37943  |                                                       |
| 8 | 1.4E+08 | 1.4E+08 | KD2-H4K8la_peak_5967 | 6.96161  |                                                       |
| 8 | 1.4E+08 | 1.4E+08 | KD2-H4K8la_peak_5968 | 12.56761 |                                                       |
| 8 | 1.4E+08 | 1.4E+08 | KD2-H4K8la_peak_5969 | 4.6555   | CTD-3064M3.4_ENSG00000244998;PTP4A3_ENSG00000184489   |
| 8 | 1.4E+08 | 1.4E+08 | KD2-H4K8la_peak_5970 | 12.13455 | CTD-3064M3.4_ENSG00000244998;PTP4A3_ENSG00000184489   |
| 8 | 1.4E+08 | 1.4E+08 | KD2-H4K8la_peak_5971 | 7.56395  |                                                       |
| 8 | 1.4E+08 | 1.4E+08 | KD2-H4K8la_peak_5972 | 5.27164  | TSNARE1_ENSG00000171045;RP13-467H17.1_ENSG00000261693 |
| 8 | 1.4E+08 | 1.4E+08 | KD2-H4K8la_peak_5973 | 11.15747 |                                                       |
| 8 | 1.4E+08 | 1.4E+08 | KD2-H4K8la_peak_5974 | 8.56099  |                                                       |
| 8 | 1.4E+08 | 1.4E+08 | KD2-H4K8la_peak_5975 | 9.70817  |                                                       |
| 8 | 1.4E+08 | 1.4E+08 | KD2-H4K8la_peak_5976 | 5.23773  | RP11-273G15.2_ENSG00000247317;LY6E_ENSG00000160932    |
| 8 | 1.4E+08 | 1.4E+08 | KD2-H4K8la_peak_5977 | 16.13355 | ZFP41_ENSG00000181638;ZFP41_ENSG00000264668           |
| 8 | 1.4E+08 | 1.4E+08 | KD2-H4K8la_peak_5978 | 12.61456 |                                                       |

|   |         |         |                      |          |                                                    |
|---|---------|---------|----------------------|----------|----------------------------------------------------|
| 8 | 1.4E+08 | 1.4E+08 | KD2-H4K8la_peak_5979 | 15.97418 | RP13-582O9.7_ENSG00000272172                       |
| 8 | 1.4E+08 | 1.4E+08 | KD2-H4K8la_peak_5980 | 9.37943  |                                                    |
| 8 | 1.4E+08 | 1.4E+08 | KD2-H4K8la_peak_5981 | 8.23729  |                                                    |
| 8 | 1.4E+08 | 1.4E+08 | KD2-H4K8la_peak_5982 | 5.58883  | ZNF623_ENSG00000183309                             |
| 8 | 1.4E+08 | 1.4E+08 | KD2-H4K8la_peak_5983 | 6.18994  | PUF60_ENSG00000179950                              |
| 8 | 1.5E+08 | 1.5E+08 | KD2-H4K8la_peak_5984 | 5.98775  | PLEC_ENSG00000178209                               |
| 8 | 1.5E+08 | 1.5E+08 | KD2-H4K8la_peak_5985 | 4.92443  | CYC1_ENSG00000179091                               |
| 8 | 1.5E+08 | 1.5E+08 | KD2-H4K8la_peak_5986 | 8.76116  | DGAT1_ENSG00000185000                              |
| 8 | 1.5E+08 | 1.5E+08 | KD2-H4K8la_peak_5987 | 6.64804  | SCRT1_ENSG00000170616                              |
| 8 | 1.5E+08 | 1.5E+08 | KD2-H4K8la_peak_5988 | 7.81267  |                                                    |
| 8 | 1.5E+08 | 1.5E+08 | KD2-H4K8la_peak_5989 | 11.20123 | FBXL6_ENSG00000182325                              |
| 8 | 1.5E+08 | 1.5E+08 | KD2-H4K8la_peak_5990 | 16.73797 | ADCK5_ENSG00000173137                              |
| 8 | 1.5E+08 | 1.5E+08 | KD2-H4K8la_peak_5991 | 13.10532 |                                                    |
| 8 | 1.5E+08 | 1.5E+08 | KD2-H4K8la_peak_5992 | 6.06941  | MFSD3_ENSG00000167700                              |
| 8 | 1.5E+08 | 1.5E+08 | KD2-H4K8la_peak_5993 | 7.61975  | MFSD3_ENSG00000167700                              |
| 8 | 1.5E+08 | 1.5E+08 | KD2-H4K8la_peak_5994 | 4.7338   | ZNF251_ENSG00000198169                             |
| 8 | 1.5E+08 | 1.5E+08 | KD2-H4K8la_peak_5995 | 10.00612 | RPL8_ENSG00000161016                               |
| 8 | 1.5E+08 | 1.5E+08 | KD2-H4K8la_peak_5996 | 11.72919 | ZNF517_ENSG00000197363                             |
| 8 | 1.5E+08 | 1.5E+08 | KD2-H4K8la_peak_5997 | 7.12014  | ZNF7_ENSG00000147789                               |
| 8 | 1.5E+08 | 1.5E+08 | KD2-H4K8la_peak_5998 | 9.20163  | COMMD5_ENSG00000170619;AF235103.1_ENSG00000263640  |
| 8 | 1.5E+08 | 1.5E+08 | KD2-H4K8la_peak_5999 | 9.38376  | ZNF250_ENSG00000196150                             |
| 8 | 1.5E+08 | 1.5E+08 | KD2-H4K8la_peak_6000 | 6.13507  | C8orf33_ENSG00000182307                            |
| 9 | 470373  | 470781  | KD2-H4K8la_peak_6001 | 7.13237  | KANK1_ENSG00000107104                              |
| 9 | 3526135 | 3526362 | KD2-H4K8la_peak_6002 | 8.37064  | RFX3_ENSG00000080298;RP11-509J21.1_ENSG00000232104 |
| 9 | 4297566 | 4297814 | KD2-H4K8la_peak_6003 | 5.67034  |                                                    |
| 9 | 4662457 | 4662703 | KD2-H4K8la_peak_6004 | 9.49266  | PPAPDC2_ENSG00000205808                            |
| 9 | 5339646 | 5339964 | KD2-H4K8la_peak_6005 | 6.2278   | RLN1_ENSG00000107018                               |
| 9 | 5438272 | 5438498 | KD2-H4K8la_peak_6006 | 5.36015  | PLGRKT_ENSG00000107020                             |
| 9 | 6412347 | 6412966 | KD2-H4K8la_peak_6007 | 16.56946 | UHRF2_ENSG00000147854                              |
| 9 | 6680930 | 6681157 | KD2-H4K8la_peak_6008 | 6.64804  |                                                    |
| 9 | 1.4E+07 | 1.4E+07 | KD2-H4K8la_peak_6009 | 10.00612 |                                                    |
| 9 | 1.4E+07 | 1.4E+07 | KD2-H4K8la_peak_6010 | 4.75945  |                                                    |
| 9 | 1.4E+07 | 1.4E+07 | KD2-H4K8la_peak_6011 | 9.0413   |                                                    |
| 9 | 1.5E+07 | 1.5E+07 | KD2-H4K8la_peak_6012 | 12.13455 | ZDHHC21_ENSG00000175893                            |
| 9 | 1.9E+07 | 1.9E+07 | KD2-H4K8la_peak_6013 | 9.27415  |                                                    |
| 9 | 1.9E+07 | 1.9E+07 | KD2-H4K8la_peak_6014 | 7.19298  | RPS6_ENSG00000137154                               |
| 9 | 2.6E+07 | 2.6E+07 | KD2-H4K8la_peak_6015 | 11.24937 | TUSC1_ENSG00000198680                              |
| 9 | 2.7E+07 | 2.7E+07 | KD2-H4K8la_peak_6016 | 13.3197  | CAAP1_ENSG00000120159                              |
| 9 | 2.8E+07 | 2.8E+07 | KD2-H4K8la_peak_6017 | 8.77936  | C9orf72_ENSG00000147894                            |
| 9 | 2.8E+07 | 2.8E+07 | KD2-H4K8la_peak_6018 | 7.72421  |                                                    |
| 9 | 3.4E+07 | 3.4E+07 | KD2-H4K8la_peak_6019 | 11.20341 | PRSS3_ENSG0000010438                               |
| 9 | 3.4E+07 | 3.4E+07 | KD2-H4K8la_peak_6020 | 13.38201 | UBE2R2_ENSG00000107341                             |
| 9 | 3.4E+07 | 3.4E+07 | KD2-H4K8la_peak_6021 | 7.60756  |                                                    |
| 9 | 3.5E+07 | 3.5E+07 | KD2-H4K8la_peak_6022 | 6.0136   |                                                    |
| 9 | 3.5E+07 | 3.5E+07 | KD2-H4K8la_peak_6023 | 5.99671  |                                                    |
| 9 | 3.5E+07 | 3.5E+07 | KD2-H4K8la_peak_6024 | 7.56395  | CNTFR-AS1_ENSG00000237159                          |

|   |         |         |                      |          |                                                                                                                  |
|---|---------|---------|----------------------|----------|------------------------------------------------------------------------------------------------------------------|
| 9 | 3.5E+07 | 3.5E+07 | KD2-H4K8la_peak_6025 | 13.31601 |                                                                                                                  |
| 9 | 3.5E+07 | 3.5E+07 | KD2-H4K8la_peak_6026 | 11.77509 | SIGMAR1_ENSG00000147955;GALT_ENSG00000213930                                                                     |
| 9 | 3.5E+07 | 3.5E+07 | KD2-H4K8la_peak_6027 | 4.30663  | CCL27_ENSG00000213927;RP11-195F19.30_ENSG00000261215;RP11-195F19.5_ENSG00000187186;RP11-195F19.9_ENSG00000230074 |
| 9 | 3.5E+07 | 3.5E+07 | KD2-H4K8la_peak_6028 | 8.52349  |                                                                                                                  |
| 9 | 3.5E+07 | 3.5E+07 | KD2-H4K8la_peak_6029 | 7.92775  | PIGO_ENSG00000165282;RP11-182N22.8_ENSG00000234181                                                               |
| 9 | 3.5E+07 | 3.5E+07 | KD2-H4K8la_peak_6030 | 11.7362  | PIGO_ENSG00000165282;RP11-182N22.8_ENSG00000234181                                                               |
| 9 | 3.5E+07 | 3.5E+07 | KD2-H4K8la_peak_6031 | 5.40012  | RUSC2_ENSG00000198853                                                                                            |
| 9 | 3.6E+07 | 3.6E+07 | KD2-H4K8la_peak_6032 | 11.87032 |                                                                                                                  |
| 9 | 3.6E+07 | 3.6E+07 | KD2-H4K8la_peak_6033 | 7.79412  | ARHGEF39_ENSG00000137135                                                                                         |
| 9 | 3.6E+07 | 3.6E+07 | KD2-H4K8la_peak_6034 | 4.75945  | MSMP_ENSG00000215183;RP11-112J3.15_ENSG00000228843                                                               |
| 9 | 3.6E+07 | 3.6E+07 | KD2-H4K8la_peak_6035 | 8.89364  |                                                                                                                  |
| 9 | 3.6E+07 | 3.6E+07 | KD2-H4K8la_peak_6036 | 10.49982 |                                                                                                                  |
| 9 | 3.6E+07 | 3.6E+07 | KD2-H4K8la_peak_6037 | 4.75945  |                                                                                                                  |
| 9 | 3.7E+07 | 3.7E+07 | KD2-H4K8la_peak_6038 | 5.83285  | RP11-220I1.5_ENSG00000260100;RP11-220I1.1_ENSG00000233137                                                        |
| 9 | 3.8E+07 | 3.8E+07 | KD2-H4K8la_peak_6039 | 5.67034  | RP11-613M10.8_ENSG00000256966;TOMM5_ENSG00000175768                                                              |
| 9 | 3.8E+07 | 3.8E+07 | KD2-H4K8la_peak_6040 | 9.63529  |                                                                                                                  |
| 9 | 3.8E+07 | 3.8E+07 | KD2-H4K8la_peak_6041 | 13.13367 |                                                                                                                  |
| 9 | 3.8E+07 | 3.8E+07 | KD2-H4K8la_peak_6042 | 8.86558  | EXOSC3_ENSG00000107371;DCAF10_ENSG00000122741                                                                    |
| 9 | 3.8E+07 | 3.8E+07 | KD2-H4K8la_peak_6043 | 11.15747 | EXOSC3_ENSG00000107371;DCAF10_ENSG00000122741                                                                    |
| 9 | 3.8E+07 | 3.8E+07 | KD2-H4K8la_peak_6044 | 10.44353 |                                                                                                                  |
| 9 | 3.8E+07 | 3.8E+07 | KD2-H4K8la_peak_6045 | 9.77662  |                                                                                                                  |
| 9 | 4.5E+07 | 4.5E+07 | KD2-H4K8la_peak_6046 | 9.86881  | AL354718.1_ENSG00000268578                                                                                       |
| 9 | 6.6E+07 | 6.6E+07 | KD2-H4K8la_peak_6047 | 5.84303  |                                                                                                                  |
| 9 | 6.6E+07 | 6.6E+07 | KD2-H4K8la_peak_6048 | 6.5823   | RP11-262H14.1_ENSG00000238113;RNA5SP283_ENSG00000202474                                                          |
| 9 | 6.6E+07 | 6.6E+07 | KD2-H4K8la_peak_6049 | 5.84385  | RP11-262H14.5_ENSG00000229422                                                                                    |
| 9 | 6.8E+07 | 6.8E+07 | KD2-H4K8la_peak_6050 | 17.27815 | RP11-764K9.4_ENSG00000215548                                                                                     |
| 9 | 7.1E+07 | 7.1E+07 | KD2-H4K8la_peak_6051 | 6.61963  | FAM122A_ENSG00000187866                                                                                          |
| 9 | 7.2E+07 | 7.2E+07 | KD2-H4K8la_peak_6052 | 6.70626  |                                                                                                                  |
| 9 | 7.5E+07 | 7.5E+07 | KD2-H4K8la_peak_6053 | 10.11868 | ZFAND5_ENSG00000107372                                                                                           |
| 9 | 7.8E+07 | 7.8E+07 | KD2-H4K8la_peak_6054 | 13.01988 | C9orf40_ENSG00000135045;RP11-197P3.4_ENSG00000203321                                                             |
| 9 | 8E+07   | 8E+07   | KD2-H4K8la_peak_6055 | 8.48085  |                                                                                                                  |
| 9 | 8.1E+07 | 8.1E+07 | KD2-H4K8la_peak_6056 | 4.86896  |                                                                                                                  |
| 9 | 8.1E+07 | 8.1E+07 | KD2-H4K8la_peak_6057 | 4.71418  |                                                                                                                  |
| 9 | 8.2E+07 | 8.2E+07 | KD2-H4K8la_peak_6058 | 4.86896  | TLE4_ENSG00000106829                                                                                             |
| 9 | 8.2E+07 | 8.2E+07 | KD2-H4K8la_peak_6059 | 6.97699  |                                                                                                                  |
| 9 | 8.5E+07 | 8.5E+07 | KD2-H4K8la_peak_6060 | 8.77936  |                                                                                                                  |
| 9 | 8.6E+07 | 8.6E+07 | KD2-H4K8la_peak_6061 | 9.0516   | IDNK_ENSG00000148057                                                                                             |
| 9 | 8.6E+07 | 8.6E+07 | KD2-H4K8la_peak_6062 | 6.64804  | UBQLN1_ENSG00000135018;RP11-522I20.3_ENSG00000254473                                                             |
| 9 | 8.7E+07 | 8.7E+07 | KD2-H4K8la_peak_6063 | 7.81267  | HNRNPK_ENSG00000165119;RMI1_ENSG00000178966                                                                      |
| 9 | 8.7E+07 | 8.7E+07 | KD2-H4K8la_peak_6064 | 4.79631  |                                                                                                                  |
| 9 | 8.9E+07 | 8.9E+07 | KD2-H4K8la_peak_6065 | 8.37064  | GOLM1_ENSG00000135052                                                                                            |
| 9 | 8.9E+07 | 8.9E+07 | KD2-H4K8la_peak_6066 | 4.68652  | C9orf153_ENSG00000187753;RN7SKP264_ENSG00000223012                                                               |
| 9 | 8.9E+07 | 8.9E+07 | KD2-H4K8la_peak_6067 | 7.51302  | ZCCHC6_ENSG00000083223                                                                                           |
| 9 | 8.9E+07 | 8.9E+07 | KD2-H4K8la_peak_6068 | 10.74378 | ZCCHC6_ENSG00000083223                                                                                           |
| 9 | 9.1E+07 | 9.1E+07 | KD2-H4K8la_peak_6069 | 7.64726  |                                                                                                                  |
| 9 | 9.2E+07 | 9.2E+07 | KD2-H4K8la_peak_6070 | 5.83285  | CKS2_ENSG00000123975                                                                                             |

|   |         |         |                      |          |                                                   |
|---|---------|---------|----------------------|----------|---------------------------------------------------|
| 9 | 9.2E+07 | 9.2E+07 | KD2-H4K8la_peak_6071 | 8.41487  | SEMA4D_ENSG00000187764;AL590233.1_ENSG00000264913 |
| 9 | 9.2E+07 | 9.2E+07 | KD2-H4K8la_peak_6072 | 6.11881  | SEMA4D_ENSG00000187764                            |
| 9 | 9.2E+07 | 9.2E+07 | KD2-H4K8la_peak_6073 | 8.73956  |                                                   |
| 9 | 9.3E+07 | 9.3E+07 | KD2-H4K8la_peak_6074 | 7.51302  |                                                   |
| 9 | 9.4E+07 | 9.4E+07 | KD2-H4K8la_peak_6075 | 7.3993   | SYK_ENSG00000165025                               |
| 9 | 9.4E+07 | 9.4E+07 | KD2-H4K8la_peak_6076 | 7.81267  |                                                   |
| 9 | 9.5E+07 | 9.5E+07 | KD2-H4K8la_peak_6077 | 7.28641  |                                                   |
| 9 | 9.5E+07 | 9.5E+07 | KD2-H4K8la_peak_6078 | 5.58883  | ROR2_ENSG00000169071                              |
| 9 | 9.5E+07 | 9.5E+07 | KD2-H4K8la_peak_6079 | 7.93259  |                                                   |
| 9 | 9.5E+07 | 9.5E+07 | KD2-H4K8la_peak_6080 | 7.72421  | OMD_ENSG00000127083                               |
| 9 | 9.6E+07 | 9.6E+07 | KD2-H4K8la_peak_6081 | 6.3399   |                                                   |
| 9 | 9.6E+07 | 9.6E+07 | KD2-H4K8la_peak_6082 | 10.87555 | NINJ1_ENSG00000131669                             |
| 9 | 9.6E+07 | 9.6E+07 | KD2-H4K8la_peak_6083 | 10.36292 |                                                   |
| 9 | 9.6E+07 | 9.6E+07 | KD2-H4K8la_peak_6084 | 4.30663  | FAM120A_ENSG00000048828                           |
| 9 | 9.7E+07 | 9.7E+07 | KD2-H4K8la_peak_6085 | 5.72892  |                                                   |
| 9 | 9.7E+07 | 9.7E+07 | KD2-H4K8la_peak_6086 | 13.53941 |                                                   |
| 9 | 9.7E+07 | 9.7E+07 | KD2-H4K8la_peak_6087 | 6.22733  |                                                   |
| 9 | 9.7E+07 | 9.7E+07 | KD2-H4K8la_peak_6088 | 7.51302  | C9orf3_ENSG00000148120                            |
| 9 | 9.8E+07 | 9.8E+07 | KD2-H4K8la_peak_6089 | 6.64804  |                                                   |
| 9 | 9.8E+07 | 9.8E+07 | KD2-H4K8la_peak_6090 | 6.86458  |                                                   |
| 9 | 9.8E+07 | 9.8E+07 | KD2-H4K8la_peak_6091 | 11.15747 |                                                   |
| 9 | 9.9E+07 | 9.9E+07 | KD2-H4K8la_peak_6092 | 7.19298  | AAED1_ENSG00000158122                             |
| 9 | 1E+08   | 1E+08   | KD2-H4K8la_peak_6093 | 7.3993   | TDRD7_ENSG00000196116                             |
| 9 | 1E+08   | 1E+08   | KD2-H4K8la_peak_6094 | 8.76082  | TMOD1_ENSG00000136842                             |
| 9 | 1E+08   | 1E+08   | KD2-H4K8la_peak_6095 | 7.23116  |                                                   |
| 9 | 1E+08   | 1E+08   | KD2-H4K8la_peak_6096 | 17.33048 | ANP32B_ENSG00000136938                            |
| 9 | 1E+08   | 1E+08   | KD2-H4K8la_peak_6097 | 11.20123 | ANP32B_ENSG00000136938                            |
| 9 | 1E+08   | 1E+08   | KD2-H4K8la_peak_6098 | 6.88801  | TEX10_ENSG00000136891                             |
| 9 | 1E+08   | 1E+08   | KD2-H4K8la_peak_6099 | 6.2278   | MSANTD3_ENSG00000066697                           |
| 9 | 1E+08   | 1E+08   | KD2-H4K8la_peak_6100 | 8.77936  | MRPL50_ENSG00000136897;ZNF189_ENSG00000136870     |
| 9 | 1.1E+08 | 1.1E+08 | KD2-H4K8la_peak_6101 | 7.13237  |                                                   |
| 9 | 1.1E+08 | 1.1E+08 | KD2-H4K8la_peak_6102 | 7.13237  |                                                   |
| 9 | 1.1E+08 | 1.1E+08 | KD2-H4K8la_peak_6103 | 8.62669  |                                                   |
| 9 | 1.1E+08 | 1.1E+08 | KD2-H4K8la_peak_6104 | 7.13237  |                                                   |
| 9 | 1.1E+08 | 1.1E+08 | KD2-H4K8la_peak_6105 | 7.75267  | TMEM245_ENSG00000106771                           |
| 9 | 1.1E+08 | 1.1E+08 | KD2-H4K8la_peak_6106 | 6.3399   | LPAR1_ENSG00000198121                             |
| 9 | 1.1E+08 | 1.1E+08 | KD2-H4K8la_peak_6107 | 8.65116  |                                                   |
| 9 | 1.1E+08 | 1.1E+08 | KD2-H4K8la_peak_6108 | 5.16795  | KIAA0368_ENSG00000136813                          |
| 9 | 1.1E+08 | 1.1E+08 | KD2-H4K8la_peak_6109 | 7.72421  | ZNF483_ENSG00000173258                            |
| 9 | 1.1E+08 | 1.1E+08 | KD2-H4K8la_peak_6110 | 8.89364  | SUSD1_ENSG00000106868                             |
| 9 | 1.2E+08 | 1.2E+08 | KD2-H4K8la_peak_6111 | 6.88801  | C9orf147_ENSG00000230185;KIAA1958_ENSG00000165185 |
| 9 | 1.2E+08 | 1.2E+08 | KD2-H4K8la_peak_6112 | 10.5885  | C9orf147_ENSG00000230185;KIAA1958_ENSG00000165185 |
| 9 | 1.2E+08 | 1.2E+08 | KD2-H4K8la_peak_6113 | 5.83285  |                                                   |
| 9 | 1.2E+08 | 1.2E+08 | KD2-H4K8la_peak_6114 | 10.04111 | ATP6V1G1_ENSG00000136888                          |
| 9 | 1.2E+08 | 1.2E+08 | KD2-H4K8la_peak_6115 | 13.23927 | C9orf91_ENSG00000157693                           |
| 9 | 1.2E+08 | 1.2E+08 | KD2-H4K8la_peak_6116 | 8.44557  | ASTN2_ENSG00000148219                             |

|   |         |         |                      |          |                                                    |
|---|---------|---------|----------------------|----------|----------------------------------------------------|
| 9 | 1.2E+08 | 1.2E+08 | KD2-H4K8la_peak_6117 | 6.28277  |                                                    |
| 9 | 1.2E+08 | 1.2E+08 | KD2-H4K8la_peak_6118 | 5.16795  | CDK5RAP2_ENSG00000136861                           |
| 9 | 1.2E+08 | 1.2E+08 | KD2-H4K8la_peak_6119 | 16.8445  | MEGF9_ENSG00000106780                              |
| 9 | 1.2E+08 | 1.2E+08 | KD2-H4K8la_peak_6120 | 10.74378 | PHF19_ENSG00000119403                              |
| 9 | 1.2E+08 | 1.2E+08 | KD2-H4K8la_peak_6121 | 5.47284  | STOM_ENSG00000148175                               |
| 9 | 1.2E+08 | 1.2E+08 | KD2-H4K8la_peak_6122 | 6.25288  |                                                    |
| 9 | 1.2E+08 | 1.2E+08 | KD2-H4K8la_peak_6123 | 5.95337  | TTLL11_ENSG00000175764                             |
| 9 | 1.3E+08 | 1.3E+08 | KD2-H4K8la_peak_6124 | 6.64804  |                                                    |
| 9 | 1.3E+08 | 1.3E+08 | KD2-H4K8la_peak_6125 | 4.86896  | DENND1A_ENSG00000119522                            |
| 9 | 1.3E+08 | 1.3E+08 | KD2-H4K8la_peak_6126 | 7.05576  | DENND1A_ENSG00000119522                            |
| 9 | 1.3E+08 | 1.3E+08 | KD2-H4K8la_peak_6127 | 6.2278   | NEK6_ENSG00000119408                               |
| 9 | 1.3E+08 | 1.3E+08 | KD2-H4K8la_peak_6128 | 12.80043 |                                                    |
| 9 | 1.3E+08 | 1.3E+08 | KD2-H4K8la_peak_6129 | 11.76151 |                                                    |
| 9 | 1.3E+08 | 1.3E+08 | KD2-H4K8la_peak_6130 | 6.0136   |                                                    |
| 9 | 1.3E+08 | 1.3E+08 | KD2-H4K8la_peak_6131 | 9.35473  | RPL35_ENSG00000136942;ARPC5L_ENSG00000136950       |
| 9 | 1.3E+08 | 1.3E+08 | KD2-H4K8la_peak_6132 | 7.86224  |                                                    |
| 9 | 1.3E+08 | 1.3E+08 | KD2-H4K8la_peak_6133 | 13.38201 | MAPKAP1_ENSG00000119487                            |
| 9 | 1.3E+08 | 1.3E+08 | KD2-H4K8la_peak_6134 | 5.11209  | RP11-423C15.3_ENSG00000229582;PBX3_ENSG00000167081 |
| 9 | 1.3E+08 | 1.3E+08 | KD2-H4K8la_peak_6135 | 9.86881  | RP11-343J18.1_ENSG00000228392                      |
| 9 | 1.3E+08 | 1.3E+08 | KD2-H4K8la_peak_6136 | 5.05146  | MVB12B_ENSG00000196814                             |
| 9 | 1.3E+08 | 1.3E+08 | KD2-H4K8la_peak_6137 | 6.68593  |                                                    |
| 9 | 1.3E+08 | 1.3E+08 | KD2-H4K8la_peak_6138 | 6.47589  | AL356309.1_ENSG00000221768                         |
| 9 | 1.3E+08 | 1.3E+08 | KD2-H4K8la_peak_6139 | 9.19451  |                                                    |
| 9 | 1.3E+08 | 1.3E+08 | KD2-H4K8la_peak_6140 | 7.49467  |                                                    |
| 9 | 1.3E+08 | 1.3E+08 | KD2-H4K8la_peak_6141 | 8.76116  |                                                    |
| 9 | 1.3E+08 | 1.3E+08 | KD2-H4K8la_peak_6142 | 12.39776 |                                                    |
| 9 | 1.3E+08 | 1.3E+08 | KD2-H4K8la_peak_6143 | 10.02595 |                                                    |
| 9 | 1.3E+08 | 1.3E+08 | KD2-H4K8la_peak_6144 | 7.61975  |                                                    |
| 9 | 1.3E+08 | 1.3E+08 | KD2-H4K8la_peak_6145 | 17.45665 |                                                    |
| 9 | 1.3E+08 | 1.3E+08 | KD2-H4K8la_peak_6146 | 4.69635  |                                                    |
| 9 | 1.3E+08 | 1.3E+08 | KD2-H4K8la_peak_6147 | 8.16787  |                                                    |
| 9 | 1.3E+08 | 1.3E+08 | KD2-H4K8la_peak_6148 | 6.36753  | ST6GALNAC4_ENSG00000136840                         |
| 9 | 1.3E+08 | 1.3E+08 | KD2-H4K8la_peak_6149 | 6.23124  |                                                    |
| 9 | 1.3E+08 | 1.3E+08 | KD2-H4K8la_peak_6150 | 11.29733 |                                                    |
| 9 | 1.3E+08 | 1.3E+08 | KD2-H4K8la_peak_6151 | 10.49982 |                                                    |
| 9 | 1.3E+08 | 1.3E+08 | KD2-H4K8la_peak_6152 | 8.69108  |                                                    |
| 9 | 1.3E+08 | 1.3E+08 | KD2-H4K8la_peak_6153 | 8.76116  | PTGES2_ENSG00000148334;AL590708.2_ENSG00000232850  |
| 9 | 1.3E+08 | 1.3E+08 | KD2-H4K8la_peak_6154 | 6.59301  | C9orf16_ENSG00000171159                            |
| 9 | 1.3E+08 | 1.3E+08 | KD2-H4K8la_peak_6155 | 6.0136   |                                                    |
| 9 | 1.3E+08 | 1.3E+08 | KD2-H4K8la_peak_6156 | 14.30153 | MIR199B_ENSG00000207581;MIR3154_ENSG00000264823    |
| 9 | 1.3E+08 | 1.3E+08 | KD2-H4K8la_peak_6157 | 4.86896  |                                                    |
| 9 | 1.3E+08 | 1.3E+08 | KD2-H4K8la_peak_6158 | 7.19244  | SWI5_ENSG00000175854;GOLGA2_ENSG00000167110        |
| 9 | 1.3E+08 | 1.3E+08 | KD2-H4K8la_peak_6159 | 7.3993   | SLC27A4_ENSG00000167114                            |
| 9 | 1.3E+08 | 1.3E+08 | KD2-H4K8la_peak_6160 | 9.29385  |                                                    |
| 9 | 1.3E+08 | 1.3E+08 | KD2-H4K8la_peak_6161 | 8.24671  |                                                    |
| 9 | 1.3E+08 | 1.3E+08 | KD2-H4K8la_peak_6162 | 8.07102  |                                                    |

|   |         |         |                      |          |                                                        |
|---|---------|---------|----------------------|----------|--------------------------------------------------------|
| 9 | 1.3E+08 | 1.3E+08 | KD2-H4K8la_peak_6163 | 7.56395  | TBC1D13_ENSG00000107021                                |
| 9 | 1.3E+08 | 1.3E+08 | KD2-H4K8la_peak_6164 | 8.37064  | CRAT_ENSG00000095321;PPP2R4_ENSG00000119383            |
| 9 | 1.3E+08 | 1.3E+08 | KD2-H4K8la_peak_6165 | 14.7348  |                                                        |
| 9 | 1.3E+08 | 1.3E+08 | KD2-H4K8la_peak_6166 | 7.23932  |                                                        |
| 9 | 1.3E+08 | 1.3E+08 | KD2-H4K8la_peak_6167 | 11.77509 | IER5L_ENSG00000188483                                  |
| 9 | 1.3E+08 | 1.3E+08 | KD2-H4K8la_peak_6168 | 8.43222  |                                                        |
| 9 | 1.3E+08 | 1.3E+08 | KD2-H4K8la_peak_6169 | 7.91061  |                                                        |
| 9 | 1.3E+08 | 1.3E+08 | KD2-H4K8la_peak_6170 | 7.51014  | C9orf106_ENSG00000179082                               |
| 9 | 1.3E+08 | 1.3E+08 | KD2-H4K8la_peak_6171 | 11.06859 | C9orf106_ENSG00000179082                               |
| 9 | 1.3E+08 | 1.3E+08 | KD2-H4K8la_peak_6172 | 4.86896  |                                                        |
| 9 | 1.3E+08 | 1.3E+08 | KD2-H4K8la_peak_6173 | 5.22418  |                                                        |
| 9 | 1.3E+08 | 1.3E+08 | KD2-H4K8la_peak_6174 | 6.64804  |                                                        |
| 9 | 1.3E+08 | 1.3E+08 | KD2-H4K8la_peak_6175 | 7.19244  |                                                        |
| 9 | 1.3E+08 | 1.3E+08 | KD2-H4K8la_peak_6176 | 15.08271 |                                                        |
| 9 | 1.3E+08 | 1.3E+08 | KD2-H4K8la_peak_6177 | 5.05146  |                                                        |
| 9 | 1.3E+08 | 1.3E+08 | KD2-H4K8la_peak_6178 | 7.03956  |                                                        |
| 9 | 1.3E+08 | 1.3E+08 | KD2-H4K8la_peak_6179 | 6.68593  |                                                        |
| 9 | 1.3E+08 | 1.3E+08 | KD2-H4K8la_peak_6180 | 15.37939 |                                                        |
| 9 | 1.3E+08 | 1.3E+08 | KD2-H4K8la_peak_6181 | 6.64804  |                                                        |
| 9 | 1.3E+08 | 1.3E+08 | KD2-H4K8la_peak_6182 | 17.92782 | RP11-65J3.14_ENSG00000261334                           |
| 9 | 1.3E+08 | 1.3E+08 | KD2-H4K8la_peak_6183 | 11.15747 | RP11-65J3.14_ENSG00000261334;LINC00963_ENSG00000204054 |
| 9 | 1.3E+08 | 1.3E+08 | KD2-H4K8la_peak_6184 | 8.39919  | RP11-65J3.14_ENSG00000261334;LINC00963_ENSG00000204054 |
| 9 | 1.3E+08 | 1.3E+08 | KD2-H4K8la_peak_6185 | 8.47841  |                                                        |
| 9 | 1.3E+08 | 1.3E+08 | KD2-H4K8la_peak_6186 | 7.61975  |                                                        |
| 9 | 1.3E+08 | 1.3E+08 | KD2-H4K8la_peak_6187 | 6.06941  | C9orf50_ENSG00000179058                                |
| 9 | 1.3E+08 | 1.3E+08 | KD2-H4K8la_peak_6188 | 9.48768  |                                                        |
| 9 | 1.3E+08 | 1.3E+08 | KD2-H4K8la_peak_6189 | 7.59044  | ASB6_ENSG00000148331                                   |
| 9 | 1.3E+08 | 1.3E+08 | KD2-H4K8la_peak_6190 | 6.4136   |                                                        |
| 9 | 1.3E+08 | 1.3E+08 | KD2-H4K8la_peak_6191 | 7.12014  | PRRX2_ENSG00000167157                                  |
| 9 | 1.3E+08 | 1.3E+08 | KD2-H4K8la_peak_6192 | 11.15747 |                                                        |
| 9 | 1.3E+08 | 1.3E+08 | KD2-H4K8la_peak_6193 | 5.76341  | GPR107_ENSG00000148358                                 |
| 9 | 1.3E+08 | 1.3E+08 | KD2-H4K8la_peak_6194 | 7.92775  |                                                        |
| 9 | 1.3E+08 | 1.3E+08 | KD2-H4K8la_peak_6195 | 5.27164  |                                                        |
| 9 | 1.3E+08 | 1.3E+08 | KD2-H4K8la_peak_6196 | 8.76082  |                                                        |
| 9 | 1.3E+08 | 1.3E+08 | KD2-H4K8la_peak_6197 | 8.33263  |                                                        |
| 9 | 1.3E+08 | 1.3E+08 | KD2-H4K8la_peak_6198 | 9.27415  |                                                        |
| 9 | 1.3E+08 | 1.3E+08 | KD2-H4K8la_peak_6199 | 7.25464  |                                                        |
| 9 | 1.3E+08 | 1.3E+08 | KD2-H4K8la_peak_6200 | 9.9701   | ASS1_ENSG00000130707                                   |
| 9 | 1.3E+08 | 1.3E+08 | KD2-H4K8la_peak_6201 | 5.90392  |                                                        |
| 9 | 1.3E+08 | 1.3E+08 | KD2-H4K8la_peak_6202 | 6.13507  |                                                        |
| 9 | 1.3E+08 | 1.3E+08 | KD2-H4K8la_peak_6203 | 4.75945  |                                                        |
| 9 | 1.3E+08 | 1.3E+08 | KD2-H4K8la_peak_6204 | 4.30663  |                                                        |
| 9 | 1.3E+08 | 1.3E+08 | KD2-H4K8la_peak_6205 | 8.76116  |                                                        |
| 9 | 1.3E+08 | 1.3E+08 | KD2-H4K8la_peak_6206 | 10.16645 | EXOSC2_ENSG00000130713                                 |
| 9 | 1.3E+08 | 1.3E+08 | KD2-H4K8la_peak_6207 | 4.75945  |                                                        |
| 9 | 1.3E+08 | 1.3E+08 | KD2-H4K8la_peak_6208 | 6.13507  |                                                        |

|   |         |         |                      |          |                                                                     |
|---|---------|---------|----------------------|----------|---------------------------------------------------------------------|
| 9 | 1.3E+08 | 1.3E+08 | KD2-H4K8la_peak_6209 | 10.97039 | PRRC2B_ENSG00000130723                                              |
| 9 | 1.3E+08 | 1.3E+08 | KD2-H4K8la_peak_6210 | 19.53802 | UCK1_ENSG00000130717                                                |
| 9 | 1.3E+08 | 1.3E+08 | KD2-H4K8la_peak_6211 | 9.54333  | RAPGEF1_ENSG00000107263                                             |
| 9 | 1.4E+08 | 1.4E+08 | KD2-H4K8la_peak_6212 | 11.15747 | TSC1_ENSG00000165699;GFI1B_ENSG00000165702;MIR548AW_ENSG00000263816 |
| 9 | 1.4E+08 | 1.4E+08 | KD2-H4K8la_peak_6213 | 5.468    | GTF3C5_ENSG00000148308                                              |
| 9 | 1.4E+08 | 1.4E+08 | KD2-H4K8la_peak_6214 | 13.01988 | REXO4_ENSG00000148300                                               |
| 9 | 1.4E+08 | 1.4E+08 | KD2-H4K8la_peak_6215 | 9.11321  |                                                                     |
| 9 | 1.4E+08 | 1.4E+08 | KD2-H4K8la_peak_6216 | 6.28277  |                                                                     |
| 9 | 1.4E+08 | 1.4E+08 | KD2-H4K8la_peak_6217 | 7.49467  |                                                                     |
| 9 | 1.4E+08 | 1.4E+08 | KD2-H4K8la_peak_6218 | 6.8348   |                                                                     |
| 9 | 1.4E+08 | 1.4E+08 | KD2-H4K8la_peak_6219 | 11.42695 |                                                                     |
| 9 | 1.4E+08 | 1.4E+08 | KD2-H4K8la_peak_6220 | 11.28887 |                                                                     |
| 9 | 1.4E+08 | 1.4E+08 | KD2-H4K8la_peak_6221 | 4.86896  |                                                                     |
| 9 | 1.4E+08 | 1.4E+08 | KD2-H4K8la_peak_6222 | 25.55588 |                                                                     |
| 9 | 1.4E+08 | 1.4E+08 | KD2-H4K8la_peak_6223 | 4.86896  | LL09NC01-254D11.1_ENSG00000261018                                   |
| 9 | 1.4E+08 | 1.4E+08 | KD2-H4K8la_peak_6224 | 7.61975  |                                                                     |
| 9 | 1.4E+08 | 1.4E+08 | KD2-H4K8la_peak_6225 | 4.3076   |                                                                     |
| 9 | 1.4E+08 | 1.4E+08 | KD2-H4K8la_peak_6226 | 9.20163  | VAV2_ENSG00000160293                                                |
| 9 | 1.4E+08 | 1.4E+08 | KD2-H4K8la_peak_6227 | 8.07044  | BRD3_ENSG00000169925                                                |
| 9 | 1.4E+08 | 1.4E+08 | KD2-H4K8la_peak_6228 | 9.97166  | RNU6ATAC_ENSG00000221676                                            |
| 9 | 1.4E+08 | 1.4E+08 | KD2-H4K8la_peak_6229 | 5.09794  |                                                                     |
| 9 | 1.4E+08 | 1.4E+08 | KD2-H4K8la_peak_6230 | 5.05146  |                                                                     |
| 9 | 1.4E+08 | 1.4E+08 | KD2-H4K8la_peak_6231 | 6.56022  |                                                                     |
| 9 | 1.4E+08 | 1.4E+08 | KD2-H4K8la_peak_6232 | 5.99671  |                                                                     |
| 9 | 1.4E+08 | 1.4E+08 | KD2-H4K8la_peak_6233 | 10.16645 | PPP1R26_ENSG00000196422                                             |
| 9 | 1.4E+08 | 1.4E+08 | KD2-H4K8la_peak_6234 | 7.96951  | PPP1R26-AS1_ENSG00000225361                                         |
| 9 | 1.4E+08 | 1.4E+08 | KD2-H4K8la_peak_6235 | 13.6415  |                                                                     |
| 9 | 1.4E+08 | 1.4E+08 | KD2-H4K8la_peak_6236 | 6.01825  |                                                                     |
| 9 | 1.4E+08 | 1.4E+08 | KD2-H4K8la_peak_6237 | 7.33815  |                                                                     |
| 9 | 1.4E+08 | 1.4E+08 | KD2-H4K8la_peak_6238 | 9.44217  | RP11-83N9.5_ENSG00000260193                                         |
| 9 | 1.4E+08 | 1.4E+08 | KD2-H4K8la_peak_6239 | 6.13507  | C9orf69_ENSG00000238227                                             |
| 9 | 1.4E+08 | 1.4E+08 | KD2-H4K8la_peak_6240 | 8.76116  | QSOX2_ENSG00000165661                                               |
| 9 | 1.4E+08 | 1.4E+08 | KD2-H4K8la_peak_6241 | 7.51014  | DKFZP434A062_ENSG00000267845                                        |
| 9 | 1.4E+08 | 1.4E+08 | KD2-H4K8la_peak_6242 | 8.76116  | GPSM1_ENSG00000160360                                               |
| 9 | 1.4E+08 | 1.4E+08 | KD2-H4K8la_peak_6243 | 10.1108  | GPSM1_ENSG00000160360                                               |
| 9 | 1.4E+08 | 1.4E+08 | KD2-H4K8la_peak_6244 | 14.20958 | DNLZ_ENSG00000213221                                                |
| 9 | 1.4E+08 | 1.4E+08 | KD2-H4K8la_peak_6245 | 8.13557  | DNLZ_ENSG00000213221                                                |
| 9 | 1.4E+08 | 1.4E+08 | KD2-H4K8la_peak_6246 | 8.37064  | CARD9_ENSG00000187796                                               |
| 9 | 1.4E+08 | 1.4E+08 | KD2-H4K8la_peak_6247 | 9.9701   | SNAPC4_ENSG00000165684                                              |
| 9 | 1.4E+08 | 1.4E+08 | KD2-H4K8la_peak_6248 | 10.02595 | SDCCAG3_ENSG00000165689;PMPCA_ENSG00000165688                       |
| 9 | 1.4E+08 | 1.4E+08 | KD2-H4K8la_peak_6249 | 12.93686 | INPP5E_ENSG00000148384                                              |
| 9 | 1.4E+08 | 1.4E+08 | KD2-H4K8la_peak_6250 | 8.3574   |                                                                     |
| 9 | 1.4E+08 | 1.4E+08 | KD2-H4K8la_peak_6251 | 7.92775  |                                                                     |
| 9 | 1.4E+08 | 1.4E+08 | KD2-H4K8la_peak_6252 | 5.43278  |                                                                     |
| 9 | 1.4E+08 | 1.4E+08 | KD2-H4K8la_peak_6253 | 10.58561 | FAM69B_ENSG00000165716                                              |
| 9 | 1.4E+08 | 1.4E+08 | KD2-H4K8la_peak_6254 | 9.77334  | SNHG7_ENSG00000233016                                               |



|      |         |         |                      |          |                                               |
|------|---------|---------|----------------------|----------|-----------------------------------------------|
| 9    | 1.4E+08 | 1.4E+08 | KD2-H4K8la_peak_6255 | 6.78322  |                                               |
| 9    | 1.4E+08 | 1.4E+08 | KD2-H4K8la_peak_6256 | 4.30663  | PHPT1_ENSG00000054148                         |
| 9    | 1.4E+08 | 1.4E+08 | KD2-H4K8la_peak_6257 | 8.39919  | EDF1_ENSG00000107223                          |
| 9    | 1.4E+08 | 1.4E+08 | KD2-H4K8la_peak_6258 | 8.39919  | MIR4479_ENSG00000266507                       |
| 9    | 1.4E+08 | 1.4E+08 | KD2-H4K8la_peak_6259 | 8.39919  | FBXW5_ENSG00000159069;C8G_ENSG00000176919     |
| 9    | 1.4E+08 | 1.4E+08 | KD2-H4K8la_peak_6260 | 9.61894  | LCN12_ENSG00000184925                         |
| 9    | 1.4E+08 | 1.4E+08 | KD2-H4K8la_peak_6261 | 6.18994  | NPDC1_ENSG00000107281                         |
| 9    | 1.4E+08 | 1.4E+08 | KD2-H4K8la_peak_6262 | 7.92775  | ENTPD2_ENSG00000054179                        |
| 9    | 1.4E+08 | 1.4E+08 | KD2-H4K8la_peak_6263 | 7.94013  | SAPCD2_ENSG00000186193                        |
| 9    | 1.4E+08 | 1.4E+08 | KD2-H4K8la_peak_6264 | 7.61975  | DPP7_ENSG00000176978                          |
| 9    | 1.4E+08 | 1.4E+08 | KD2-H4K8la_peak_6265 | 6.97699  |                                               |
| 9    | 1.4E+08 | 1.4E+08 | KD2-H4K8la_peak_6266 | 9.27415  | ANAPC2_ENSG00000176248;SSNA1_ENSG00000176101  |
| 9    | 1.4E+08 | 1.4E+08 | KD2-H4K8la_peak_6267 | 6.68593  |                                               |
| 9    | 1.4E+08 | 1.4E+08 | KD2-H4K8la_peak_6268 | 11.7362  | TUBB4B_ENSG00000188229                        |
| 9    | 1.4E+08 | 1.4E+08 | KD2-H4K8la_peak_6269 | 9.9701   | NELFB_ENSG00000188986                         |
| 9    | 1.4E+08 | 1.4E+08 | KD2-H4K8la_peak_6270 | 13.13367 | NELFB_ENSG00000188986                         |
| 9    | 1.4E+08 | 1.4E+08 | KD2-H4K8la_peak_6271 | 11.20341 |                                               |
| 9    | 1.4E+08 | 1.4E+08 | KD2-H4K8la_peak_6272 | 4.6555   |                                               |
| 9    | 1.4E+08 | 1.4E+08 | KD2-H4K8la_peak_6273 | 6.3399   | RP13-122B23.8_ENSG00000260996                 |
| 9    | 1.4E+08 | 1.4E+08 | KD2-H4K8la_peak_6274 | 6.68593  | NRARP_ENSG00000198435                         |
| 9    | 1.4E+08 | 1.4E+08 | KD2-H4K8la_peak_6275 | 12.166   |                                               |
| 9    | 1.4E+08 | 1.4E+08 | KD2-H4K8la_peak_6276 | 9.27415  |                                               |
| 9    | 1.4E+08 | 1.4E+08 | KD2-H4K8la_peak_6277 | 7.61975  | EXD3_ENSG00000187609;NOXA1_ENSG00000188747    |
| 9    | 1.4E+08 | 1.4E+08 | KD2-H4K8la_peak_6278 | 6.3399   | EXD3_ENSG00000187609;NOXA1_ENSG00000188747    |
| 9    | 1.4E+08 | 1.4E+08 | KD2-H4K8la_peak_6279 | 4.66473  | NSMF_ENSG00000165802                          |
| 9    | 1.4E+08 | 1.4E+08 | KD2-H4K8la_peak_6280 | 8.13727  | DPH7_ENSG00000148399                          |
| 9    | 1.4E+08 | 1.4E+08 | KD2-H4K8la_peak_6281 | 9.10568  | C9orf37_ENSG00000203993;EHMT1_ENSG00000181090 |
| 9    | 1.4E+08 | 1.4E+08 | KD2-H4K8la_peak_6282 | 11.15747 | CACNA1B_ENSG00000148408                       |
| 0001 | 114691  | 114984  | KD2-H4K8la_peak_6283 | 7.79412  |                                               |
| 0001 | 30120   | 30565   | KD2-H4K8la_peak_6284 | 8.45512  |                                               |
| 0001 | 32160   | 32359   | KD2-H4K8la_peak_6285 | 9.62441  |                                               |
| 0001 | 33126   | 33486   | KD2-H4K8la_peak_6286 | 5.64882  |                                               |
| 0001 | 86962   | 87173   | KD2-H4K8la_peak_6287 | 8.77747  |                                               |
| 0001 | 121310  | 121535  | KD2-H4K8la_peak_6288 | 5.0364   |                                               |
| 0001 | 138050  | 138257  | KD2-H4K8la_peak_6289 | 9.7321   |                                               |
| 0002 | 85821   | 86020   | KD2-H4K8la_peak_6290 | 14.0867  |                                               |
| 0002 | 86960   | 87232   | KD2-H4K8la_peak_6291 | 23.05476 |                                               |
| 0002 | 87935   | 88441   | KD2-H4K8la_peak_6292 | 18.13987 |                                               |
| 0002 | 110110  | 111901  | KD2-H4K8la_peak_6293 | 28.70666 |                                               |
| 0002 | 47457   | 48007   | KD2-H4K8la_peak_6294 | 9.49266  |                                               |
| 0002 | 29779   | 30016   | KD2-H4K8la_peak_6295 | 9.58311  |                                               |
| 0002 | 30445   | 30756   | KD2-H4K8la_peak_6296 | 18.98252 |                                               |
| 0002 | 41305   | 42170   | KD2-H4K8la_peak_6297 | 7.11805  |                                               |
| 0002 | 44712   | 44967   | KD2-H4K8la_peak_6298 | 12.69007 |                                               |
| 0002 | 45223   | 45625   | KD2-H4K8la_peak_6299 | 9.40293  |                                               |
| 0002 | 99837   | 100403  | KD2-H4K8la_peak_6300 | 34.06538 |                                               |

|       |         |         |                      |          |                                               |
|-------|---------|---------|----------------------|----------|-----------------------------------------------|
| 0002: | 6438    | 7130    | KD2-H4K8la_peak_6301 | 8.45512  |                                               |
| 0002: | 30916   | 31511   | KD2-H4K8la_peak_6302 | 6.63197  |                                               |
| X     | 347506  | 347856  | KD2-H4K8la_peak_6303 | 5.80888  | PPP2R3B_ENSG00000167393                       |
| X     | 1511373 | 1511575 | KD2-H4K8la_peak_6304 | 7.90495  | SLC25A6_ENSG00000169100                       |
| X     | 2418326 | 2418628 | KD2-H4K8la_peak_6305 | 7.12014  | ZBED1_ENSG00000214717                         |
| X     | 3733723 | 3734372 | KD2-H4K8la_peak_6306 | 13.03006 |                                               |
| X     | 7065695 | 7066081 | KD2-H4K8la_peak_6307 | 10.97039 | HDHD1_ENSG00000130021;MIR4767_ENSG00000264268 |
| X     | 1.5E+07 | 1.5E+07 | KD2-H4K8la_peak_6308 | 7.13237  |                                               |
| X     | 1.7E+07 | 1.7E+07 | KD2-H4K8la_peak_6309 | 6.2278   | CTPS2_ENSG00000047230                         |
| X     | 1.7E+07 | 1.7E+07 | KD2-H4K8la_peak_6310 | 5.72892  | SYAP1_ENSG00000169895                         |
| X     | 1.7E+07 | 1.7E+07 | KD2-H4K8la_peak_6311 | 8.12466  | TXLNG_ENSG00000086712                         |
| X     | 1.7E+07 | 1.7E+07 | KD2-H4K8la_peak_6312 | 6.26214  | RBBP7_ENSG00000102054                         |
| X     | 1.7E+07 | 1.7E+07 | KD2-H4K8la_peak_6313 | 5.36015  |                                               |
| X     | 1.9E+07 | 1.9E+07 | KD2-H4K8la_peak_6314 | 6.64804  | PPEF1_ENSG00000086717                         |
| X     | 1.9E+07 | 1.9E+07 | KD2-H4K8la_peak_6315 | 8.77936  |                                               |
| X     | 2E+07   | 2E+07   | KD2-H4K8la_peak_6316 | 6.2278   | EIF1AX_ENSG00000173674                        |
| X     | 2.4E+07 | 2.4E+07 | KD2-H4K8la_peak_6317 | 5.10388  | ZFX-AS1_ENSG00000234230;ZFX_ENSG00000005889   |
| X     | 2.4E+07 | 2.4E+07 | KD2-H4K8la_peak_6318 | 12.211   | ZFX-AS1_ENSG00000234230;ZFX_ENSG00000005889   |
| X     | 3.9E+07 | 3.9E+07 | KD2-H4K8la_peak_6319 | 4.94337  |                                               |
| X     | 4E+07   | 4E+07   | KD2-H4K8la_peak_6320 | 7.13237  |                                               |
| X     | 4E+07   | 4E+07   | KD2-H4K8la_peak_6321 | 6.26214  |                                               |
| X     | 4E+07   | 4E+07   | KD2-H4K8la_peak_6322 | 5.67034  | BCOR_ENSG00000183337                          |
| X     | 4E+07   | 4E+07   | KD2-H4K8la_peak_6323 | 7.23116  |                                               |
| X     | 4.1E+07 | 4.1E+07 | KD2-H4K8la_peak_6324 | 9.27415  | DDX3X_ENSG00000215301                         |
| X     | 4.1E+07 | 4.1E+07 | KD2-H4K8la_peak_6325 | 6.70626  |                                               |
| X     | 4.4E+07 | 4.4E+07 | KD2-H4K8la_peak_6326 | 6.2278   | FUNDC1_ENSG00000069509                        |
| X     | 4.5E+07 | 4.5E+07 | KD2-H4K8la_peak_6327 | 10.99007 | KDM6A_ENSG00000147050                         |
| X     | 4.7E+07 | 4.7E+07 | KD2-H4K8la_peak_6328 | 12.62032 |                                               |
| X     | 4.9E+07 | 4.9E+07 | KD2-H4K8la_peak_6329 | 6.42754  | WAS_ENSG00000015285                           |
| X     | 4.9E+07 | 4.9E+07 | KD2-H4K8la_peak_6330 | 7.49467  | TFE3_ENSG00000068323                          |
| X     | 4.9E+07 | 4.9E+07 | KD2-H4K8la_peak_6331 | 8.76082  | PPP1R3F_ENSG00000049769                       |
| X     | 5.3E+07 | 5.3E+07 | KD2-H4K8la_peak_6332 | 7.13237  |                                               |
| X     | 5.3E+07 | 5.3E+07 | KD2-H4K8la_peak_6333 | 12.1221  |                                               |
| X     | 5.3E+07 | 5.3E+07 | KD2-H4K8la_peak_6334 | 7.61975  | KDM5C_ENSG00000126012                         |
| X     | 5.4E+07 | 5.4E+07 | KD2-H4K8la_peak_6335 | 4.30663  | FAM120C_ENSG00000184083                       |
| X     | 5.5E+07 | 5.5E+07 | KD2-H4K8la_peak_6336 | 5.33364  | FAM104B_ENSG00000182518                       |
| X     | 6.8E+07 | 6.8E+07 | KD2-H4K8la_peak_6337 | 19.63589 | YIPF6_ENSG00000181704                         |
| X     | 7E+07   | 7E+07   | KD2-H4K8la_peak_6338 | 9.05604  |                                               |
| X     | 7.1E+07 | 7.1E+07 | KD2-H4K8la_peak_6339 | 6.69599  | TAF1_ENSG00000147133                          |
| X     | 7.1E+07 | 7.1E+07 | KD2-H4K8la_peak_6340 | 8.45079  |                                               |
| X     | 7.4E+07 | 7.4E+07 | KD2-H4K8la_peak_6341 | 5.22084  |                                               |
| X     | 1.1E+08 | 1.1E+08 | KD2-H4K8la_peak_6342 | 11.45154 | RBM41_ENSG00000089682                         |
| X     | 1.1E+08 | 1.1E+08 | KD2-H4K8la_peak_6343 | 8.59561  |                                               |
| X     | 1.2E+08 | 1.2E+08 | KD2-H4K8la_peak_6344 | 53.71253 |                                               |
| X     | 1.2E+08 | 1.2E+08 | KD2-H4K8la_peak_6345 | 6.13507  | NKAP_ENSG00000101882                          |
| X     | 1.3E+08 | 1.3E+08 | KD2-H4K8la_peak_6346 | 7.12497  | ELF4_ENSG00000102034                          |

|   |         |         |                      |          |                                                   |
|---|---------|---------|----------------------|----------|---------------------------------------------------|
| X | 1.3E+08 | 1.3E+08 | KD2-H4K8la_peak_6347 | 14.52454 | RAP2C-AS1_ENSG00000232160                         |
| X | 1.3E+08 | 1.3E+08 | KD2-H4K8la_peak_6348 | 6.83387  |                                                   |
| X | 1.3E+08 | 1.3E+08 | KD2-H4K8la_peak_6349 | 9.86881  |                                                   |
| X | 1.3E+08 | 1.3E+08 | KD2-H4K8la_peak_6350 | 6.60114  | DDX26B-AS1_ENSG00000225235;DDX26B_ENSG00000165359 |
| X | 1.5E+08 | 1.5E+08 | KD2-H4K8la_peak_6351 | 6.57319  |                                                   |
| X | 1.5E+08 | 1.5E+08 | KD2-H4K8la_peak_6352 | 5.83285  |                                                   |
| X | 1.5E+08 | 1.5E+08 | KD2-H4K8la_peak_6353 | 9.70191  |                                                   |
| X | 1.5E+08 | 1.5E+08 | KD2-H4K8la_peak_6354 | 7.06427  |                                                   |
| X | 1.5E+08 | 1.5E+08 | KD2-H4K8la_peak_6355 | 5.05146  |                                                   |
