# Supplementary material for: SIRT2 functions as a histone delactylase and inhibits the proliferation and migration of neuroblastoma cells
Source: PubMed Central journal article supplement (PMC9174446; doi:10.1038/s41421-022-00398-y), 2022-06-07
Supplement: 41421_2022_398_MOESM6_ESM.pdf [file 41421_2022_398_MOESM6_ESM.pdf]

**Table S6. ChIP-seq peaks and annotated genes by anti-H4K8ac antibody in SIRT2 KD SH-SY5Y cells.**

| chr | start   | end     | peakid             | -LOG(pvalue) | gene                                                        |
|-----|---------|---------|--------------------|--------------|-------------------------------------------------------------|
| 1   | 713595  | 714000  | KD2-H4K8ac_peak_1  | 11.60333     | RP11-206L10.2_ENSG00000228327;RP11-206L10.9_ENSG00000237491 |
| 1   | 714251  | 714773  | KD2-H4K8ac_peak_2  | 10.0746      | RP11-206L10.2_ENSG00000228327;RP11-206L10.9_ENSG00000237491 |
| 1   | 762378  | 762862  | KD2-H4K8ac_peak_3  | 10.19949     | LINC00115_ENSG00000225880;LINC01128_ENSG00000228794         |
| 1   | 805148  | 805560  | KD2-H4K8ac_peak_4  | 5.57044      |                                                             |
| 1   | 839303  | 839916  | KD2-H4K8ac_peak_5  | 8.30974      | RP11-54O7.16_ENSG00000272438                                |
| 1   | 871520  | 871850  | KD2-H4K8ac_peak_6  | 6.76298      |                                                             |
| 1   | 876150  | 876988  | KD2-H4K8ac_peak_7  | 10.43145     |                                                             |
| 1   | 877768  | 878366  | KD2-H4K8ac_peak_8  | 9.00811      |                                                             |
| 1   | 894246  | 894551  | KD2-H4K8ac_peak_9  | 12.57143     | NOC2L_ENSG00000188976                                       |
| 1   | 896028  | 896648  | KD2-H4K8ac_peak_10 | 8.94469      | KLHL17_ENSG00000187961                                      |
| 1   | 934711  | 935086  | KD2-H4K8ac_peak_11 | 5.14125      | HES4_ENSG00000188290                                        |
| 1   | 935854  | 936067  | KD2-H4K8ac_peak_12 | 6.05809      | HES4_ENSG00000188290                                        |
| 1   | 936793  | 937282  | KD2-H4K8ac_peak_13 | 9.94337      |                                                             |
| 1   | 939652  | 941668  | KD2-H4K8ac_peak_14 | 11.05467     |                                                             |
| 1   | 955043  | 955306  | KD2-H4K8ac_peak_15 | 7.35686      | AGRN_ENSG00000188157                                        |
| 1   | 955777  | 956105  | KD2-H4K8ac_peak_16 | 5.14125      | AGRN_ENSG00000188157                                        |
| 1   | 956811  | 957073  | KD2-H4K8ac_peak_17 | 4.9025       |                                                             |
| 1   | 1014734 | 1015939 | KD2-H4K8ac_peak_18 | 5.9696       |                                                             |
| 1   | 1016387 | 1016646 | KD2-H4K8ac_peak_19 | 8.4939       |                                                             |
| 1   | 1051214 | 1051441 | KD2-H4K8ac_peak_20 | 12.84642     | C1orf159_ENSG00000131591                                    |
| 1   | 1051976 | 1052186 | KD2-H4K8ac_peak_21 | 5.54647      | C1orf159_ENSG00000131591                                    |
| 1   | 1057734 | 1058100 | KD2-H4K8ac_peak_22 | 6.25869      |                                                             |
| 1   | 1079754 | 1080581 | KD2-H4K8ac_peak_23 | 12.93209     |                                                             |
| 1   | 1092348 | 1092561 | KD2-H4K8ac_peak_24 | 10.78136     |                                                             |
| 1   | 1092931 | 1093620 | KD2-H4K8ac_peak_25 | 13.73635     |                                                             |
| 1   | 1167701 | 1168107 | KD2-H4K8ac_peak_26 | 13.51987     | SDF4_ENSG0000078808;B3GALT6_ENSG00000176022                 |
| 1   | 1208647 | 1209220 | KD2-H4K8ac_peak_27 | 14.68449     | UBE2J2_ENSG00000160087                                      |
| 1   | 1209437 | 1210022 | KD2-H4K8ac_peak_28 | 20.13709     | UBE2J2_ENSG00000160087;RP5-902P8.10_ENSG00000230415         |
| 1   | 1239173 | 1241575 | KD2-H4K8ac_peak_29 | 15.65094     |                                                             |
| 1   | 1242838 | 1243127 | KD2-H4K8ac_peak_30 | 11.43863     | PUSL1_ENSG00000169972                                       |
| 1   | 1243500 | 1243757 | KD2-H4K8ac_peak_31 | 14.68449     | PUSL1_ENSG00000169972                                       |
| 1   | 1259745 | 1259988 | KD2-H4K8ac_peak_32 | 15.22643     | CPSF3L_ENSG00000127054                                      |
| 1   | 1260232 | 1260544 | KD2-H4K8ac_peak_33 | 14.63458     | CPSF3L_ENSG00000127054                                      |
| 1   | 1284082 | 1284430 | KD2-H4K8ac_peak_34 | 19.43192     | DVL1_ENSG00000107404                                        |
| 1   | 1285001 | 1285316 | KD2-H4K8ac_peak_35 | 10.19949     | DVL1_ENSG00000107404                                        |
| 1   | 1290664 | 1291071 | KD2-H4K8ac_peak_36 | 5.54647      |                                                             |
| 1   | 1294914 | 1295827 | KD2-H4K8ac_peak_37 | 11.7608      |                                                             |
| 1   | 1309938 | 1310554 | KD2-H4K8ac_peak_38 | 12.46522     | AURKAIP1_ENSG00000175756                                    |
| 1   | 1311010 | 1311933 | KD2-H4K8ac_peak_39 | 12.57143     | AURKAIP1_ENSG00000175756                                    |
| 1   | 1334187 | 1334673 | KD2-H4K8ac_peak_40 | 12.65397     | CCNL2_ENSG00000221978;RP4-758J18.2_ENSG00000224870          |
| 1   | 1335007 | 1335511 | KD2-H4K8ac_peak_41 | 13.13969     | CCNL2_ENSG00000221978;RP4-758J18.2_ENSG00000224870          |
| 1   | 1342145 | 1342607 | KD2-H4K8ac_peak_42 | 9.36516      | MRPL20_ENSG00000242485                                      |
| 1   | 1342810 | 1343128 | KD2-H4K8ac_peak_43 | 8.85813      | MRPL20_ENSG00000242485                                      |
| 1   | 1355736 | 1355982 | KD2-H4K8ac_peak_44 | 8.55271      | RP4-758J18.7_ENSG00000225905                                |

|   |         |         |                    |          |                                                                                                                |
|---|---------|---------|--------------------|----------|----------------------------------------------------------------------------------------------------------------|
| 1 | 1362964 | 1363310 | KD2-H4K8ac_peak_45 | 24.37317 |                                                                                                                |
| 1 | 1365709 | 1366349 | KD2-H4K8ac_peak_46 | 10.50156 |                                                                                                                |
| 1 | 1366560 | 1366777 | KD2-H4K8ac_peak_47 | 5.09296  |                                                                                                                |
| 1 | 1370603 | 1370937 | KD2-H4K8ac_peak_48 | 10.96455 | RP4-758J18.10_ENSG00000225285;VWA1_ENSG00000179403                                                             |
| 1 | 1390762 | 1391267 | KD2-H4K8ac_peak_49 | 4.54838  |                                                                                                                |
| 1 | 1397252 | 1398466 | KD2-H4K8ac_peak_50 | 8.79106  |                                                                                                                |
| 1 | 1440052 | 1440777 | KD2-H4K8ac_peak_51 | 6.65673  |                                                                                                                |
| 1 | 1446829 | 1447296 | KD2-H4K8ac_peak_52 | 12.93209 | ATAD3A_ENSG00000197785                                                                                         |
| 1 | 1475610 | 1475837 | KD2-H4K8ac_peak_53 | 5.32933  | TMEM240_ENSG00000205090                                                                                        |
| 1 | 1476095 | 1476493 | KD2-H4K8ac_peak_54 | 10.96455 | TMEM240_ENSG00000205090                                                                                        |
| 1 | 1509684 | 1510664 | KD2-H4K8ac_peak_55 | 17.16047 | SSU72_ENSG00000160075;AL645728.1_ENSG00000215014                                                               |
| 1 | 1534985 | 1535333 | KD2-H4K8ac_peak_56 | 6.30229  | C1orf233_ENSG00000228594                                                                                       |
| 1 | 1535823 | 1536131 | KD2-H4K8ac_peak_57 | 4.91674  | C1orf233_ENSG00000228594                                                                                       |
| 1 | 1550844 | 1551458 | KD2-H4K8ac_peak_58 | 28.03233 | RP11-345P4.9_ENSG00000272106;MIB2_ENSG00000197530                                                              |
| 1 | 1590273 | 1590702 | KD2-H4K8ac_peak_59 | 15.22643 | CDK11B_ENSG00000248333;RP11-345P4.10_ENSG00000272004                                                           |
| 1 | 1591202 | 1591572 | KD2-H4K8ac_peak_60 | 9.15329  | CDK11B_ENSG00000248333;RP11-345P4.10_ENSG00000272004                                                           |
| 1 | 1623764 | 1624333 | KD2-H4K8ac_peak_61 | 15.9336  | SLC35E2B_ENSG00000189339                                                                                       |
| 1 | 1709424 | 1709742 | KD2-H4K8ac_peak_62 | 7.18615  |                                                                                                                |
| 1 | 1710031 | 1710700 | KD2-H4K8ac_peak_63 | 9.67696  |                                                                                                                |
| 1 | 1821425 | 1822800 | KD2-H4K8ac_peak_64 | 13.12288 | GNB1_ENSG00000078369;RP1-140A9.1_ENSG00000231050                                                               |
| 1 | 1823025 | 1823566 | KD2-H4K8ac_peak_65 | 12.84642 | GNB1_ENSG00000078369;RP1-140A9.1_ENSG00000231050                                                               |
| 1 | 1851199 | 1851536 | KD2-H4K8ac_peak_66 | 13.80019 | TMEM52_ENSG00000178821                                                                                         |
| 1 | 1875039 | 1875588 | KD2-H4K8ac_peak_67 | 16.09057 |                                                                                                                |
| 1 | 1891329 | 1891887 | KD2-H4K8ac_peak_68 | 8.74596  |                                                                                                                |
| 1 | 1963269 | 1963562 | KD2-H4K8ac_peak_69 | 8.30974  |                                                                                                                |
| 1 | 1963774 | 1964142 | KD2-H4K8ac_peak_70 | 13.80019 |                                                                                                                |
| 1 | 1975846 | 1976440 | KD2-H4K8ac_peak_71 | 15.05364 |                                                                                                                |
| 1 | 1981062 | 1981651 | KD2-H4K8ac_peak_72 | 9.20193  | RP11-547D24.3_ENSG00000226969;PRKCZ_ENSG00000067606                                                            |
| 1 | 2004801 | 2005501 | KD2-H4K8ac_peak_73 | 4.67342  |                                                                                                                |
| 1 | 2126019 | 2127577 | KD2-H4K8ac_peak_74 | 14.90957 |                                                                                                                |
| 1 | 2135841 | 2136079 | KD2-H4K8ac_peak_75 | 7.82935  |                                                                                                                |
| 1 | 2136853 | 2137746 | KD2-H4K8ac_peak_76 | 7.26089  |                                                                                                                |
| 1 | 2143560 | 2145049 | KD2-H4K8ac_peak_77 | 13.72842 | C1orf86_ENSG00000162585;RP11-181G12.5_ENSG00000243558;RP11-181G12.4_ENSG00000234396;AL590822.1_ENSG00000203301 |
| 1 | 2145832 | 2146250 | KD2-H4K8ac_peak_78 | 4.211    | AL590822.1_ENSG00000203301                                                                                     |
| 1 | 2158131 | 2159091 | KD2-H4K8ac_peak_79 | 13.12288 |                                                                                                                |
| 1 | 2201780 | 2202186 | KD2-H4K8ac_peak_80 | 4.52514  |                                                                                                                |
| 1 | 2231767 | 2231979 | KD2-H4K8ac_peak_81 | 5.14125  |                                                                                                                |
| 1 | 2245322 | 2245520 | KD2-H4K8ac_peak_82 | 6.45083  |                                                                                                                |
| 1 | 2245792 | 2247340 | KD2-H4K8ac_peak_83 | 17.8868  |                                                                                                                |
| 1 | 2258216 | 2258411 | KD2-H4K8ac_peak_84 | 5.30799  | RP4-713A8.1_ENSG00000272161;AL589739.1_ENSG00000269753                                                         |
| 1 | 2323308 | 2323730 | KD2-H4K8ac_peak_85 | 12.23    | MORN1_ENSG00000116151;RER1_ENSG00000157916                                                                     |
| 1 | 2343501 | 2343956 | KD2-H4K8ac_peak_86 | 14.17488 |                                                                                                                |
| 1 | 2344231 | 2344868 | KD2-H4K8ac_peak_87 | 10.29842 | PEX10_ENSG00000157911                                                                                          |
| 1 | 2403845 | 2404145 | KD2-H4K8ac_peak_88 | 3.90565  |                                                                                                                |
| 1 | 2405169 | 2406352 | KD2-H4K8ac_peak_89 | 14.66631 |                                                                                                                |
| 1 | 2406572 | 2407428 | KD2-H4K8ac_peak_90 | 12.36441 |                                                                                                                |

|   |         |         |                     |          |                                                     |
|---|---------|---------|---------------------|----------|-----------------------------------------------------|
| 1 | 2411509 | 2412190 | KD2-H4K8ac_peak_91  | 10.88013 |                                                     |
| 1 | 2412635 | 2413233 | KD2-H4K8ac_peak_92  | 8.10216  |                                                     |
| 1 | 2413696 | 2414241 | KD2-H4K8ac_peak_93  | 6.99815  |                                                     |
| 1 | 2436462 | 2436805 | KD2-H4K8ac_peak_94  | 9.65086  |                                                     |
| 1 | 2457240 | 2457498 | KD2-H4K8ac_peak_95  | 6.25869  | PANK4_ENSG00000157881                               |
| 1 | 2471863 | 2472161 | KD2-H4K8ac_peak_96  | 6.35295  |                                                     |
| 1 | 2474150 | 2476613 | KD2-H4K8ac_peak_97  | 11.3923  |                                                     |
| 1 | 2476827 | 2477122 | KD2-H4K8ac_peak_98  | 6.76298  | RP3-395M20.12_ENSG00000272449                       |
| 1 | 2478024 | 2478221 | KD2-H4K8ac_peak_99  | 7.07117  | RP3-395M20.12_ENSG00000272449                       |
| 1 | 2518579 | 2518845 | KD2-H4K8ac_peak_100 | 11.2938  | FAM213B_ENSG00000157870                             |
| 1 | 2573931 | 2574577 | KD2-H4K8ac_peak_101 | 13.56049 |                                                     |
| 1 | 3073511 | 3073743 | KD2-H4K8ac_peak_102 | 5.90414  |                                                     |
| 1 | 3086794 | 3087037 | KD2-H4K8ac_peak_103 | 11.86082 |                                                     |
| 1 | 3087345 | 3087615 | KD2-H4K8ac_peak_104 | 5.01002  |                                                     |
| 1 | 3370675 | 3370970 | KD2-H4K8ac_peak_105 | 9.16531  | ARHGEF16_ENSG00000130762                            |
| 1 | 3371377 | 3371922 | KD2-H4K8ac_peak_106 | 8.12706  | ARHGEF16_ENSG00000130762                            |
| 1 | 3376571 | 3376775 | KD2-H4K8ac_peak_107 | 7.44324  |                                                     |
| 1 | 3433074 | 3434493 | KD2-H4K8ac_peak_108 | 11.43863 |                                                     |
| 1 | 3447506 | 3448008 | KD2-H4K8ac_peak_109 | 14.49045 |                                                     |
| 1 | 3455970 | 3456229 | KD2-H4K8ac_peak_110 | 4.44748  |                                                     |
| 1 | 3456930 | 3457125 | KD2-H4K8ac_peak_111 | 5.88845  |                                                     |
| 1 | 3467595 | 3468431 | KD2-H4K8ac_peak_112 | 6.75424  |                                                     |
| 1 | 3468697 | 3468989 | KD2-H4K8ac_peak_113 | 6.30229  |                                                     |
| 1 | 3469839 | 3470389 | KD2-H4K8ac_peak_114 | 6.66692  |                                                     |
| 1 | 3489929 | 3490218 | KD2-H4K8ac_peak_115 | 6.67092  |                                                     |
| 1 | 3515582 | 3516185 | KD2-H4K8ac_peak_116 | 10.0089  |                                                     |
| 1 | 3541077 | 3541296 | KD2-H4K8ac_peak_117 | 11.50346 | RP11-46F15.2_ENSG00000238260;TPRG1L_ENSG00000158109 |
| 1 | 3566068 | 3566543 | KD2-H4K8ac_peak_118 | 14.56955 |                                                     |
| 1 | 3567977 | 3569354 | KD2-H4K8ac_peak_119 | 17.70837 | WRAP73_ENSG00000116213;TP73_ENSG00000078900         |
| 1 | 3613732 | 3614267 | KD2-H4K8ac_peak_120 | 10.42398 |                                                     |
| 1 | 3627883 | 3628353 | KD2-H4K8ac_peak_121 | 5.34636  |                                                     |
| 1 | 3628977 | 3629815 | KD2-H4K8ac_peak_122 | 13.81781 |                                                     |
| 1 | 3632744 | 3633950 | KD2-H4K8ac_peak_123 | 8.20434  |                                                     |
| 1 | 3634246 | 3634574 | KD2-H4K8ac_peak_124 | 7.49599  |                                                     |
| 1 | 3635450 | 3635832 | KD2-H4K8ac_peak_125 | 8.82366  |                                                     |
| 1 | 3636216 | 3637124 | KD2-H4K8ac_peak_126 | 11.06636 |                                                     |
| 1 | 3663404 | 3663882 | KD2-H4K8ac_peak_127 | 18.25771 | TP73-AS1_ENSG00000227372                            |
| 1 | 3688721 | 3688985 | KD2-H4K8ac_peak_128 | 6.31838  | SMIM1_ENSG00000235169                               |
| 1 | 3692756 | 3692980 | KD2-H4K8ac_peak_129 | 9.95342  |                                                     |
| 1 | 3712251 | 3712934 | KD2-H4K8ac_peak_130 | 4.37809  | LRRC47_ENSG00000130764                              |
| 1 | 3713304 | 3714081 | KD2-H4K8ac_peak_131 | 10.86378 | LRRC47_ENSG00000130764                              |
| 1 | 3737266 | 3737537 | KD2-H4K8ac_peak_132 | 4.56666  |                                                     |
| 1 | 3816439 | 3816732 | KD2-H4K8ac_peak_133 | 7.36799  | C1orf174_ENSG00000198912;LINC01134_ENSG00000236423  |
| 1 | 3817541 | 3817850 | KD2-H4K8ac_peak_134 | 19.28826 | C1orf174_ENSG00000198912;LINC01134_ENSG00000236423  |
| 1 | 4786971 | 4787440 | KD2-H4K8ac_peak_135 | 8.02571  |                                                     |
| 1 | 5483616 | 5484034 | KD2-H4K8ac_peak_136 | 6.13909  |                                                     |

|   |         |         |                     |          |                                                   |
|---|---------|---------|---------------------|----------|---------------------------------------------------|
| 1 | 5484400 | 5484778 | KD2-H4K8ac_peak_137 | 8.55552  |                                                   |
| 1 | 5524341 | 5524538 | KD2-H4K8ac_peak_138 | 8.02571  |                                                   |
| 1 | 6052074 | 6052439 | KD2-H4K8ac_peak_139 | 7.13615  | NPHP4_ENSG00000131697;KCNAB2_ENSG00000069424      |
| 1 | 6094300 | 6094668 | KD2-H4K8ac_peak_140 | 10.19949 |                                                   |
| 1 | 6259072 | 6259618 | KD2-H4K8ac_peak_141 | 17.76565 |                                                   |
| 1 | 6260075 | 6260717 | KD2-H4K8ac_peak_142 | 10.19949 |                                                   |
| 1 | 6268414 | 6268653 | KD2-H4K8ac_peak_143 | 9.34989  | RPL22_ENSG00000116251                             |
| 1 | 6269204 | 6270058 | KD2-H4K8ac_peak_144 | 7.81657  | RPL22_ENSG00000116251                             |
| 1 | 6295605 | 6295961 | KD2-H4K8ac_peak_145 | 11.86082 | ICMT_ENSG00000116237;LINC00337_ENSG00000225077    |
| 1 | 6296204 | 6296535 | KD2-H4K8ac_peak_146 | 9.11031  | ICMT_ENSG00000116237;LINC00337_ENSG00000225077    |
| 1 | 6320705 | 6320943 | KD2-H4K8ac_peak_147 | 8.30974  | GPR153_ENSG00000158292                            |
| 1 | 6321352 | 6321559 | KD2-H4K8ac_peak_148 | 6.66692  | GPR153_ENSG00000158292                            |
| 1 | 6329878 | 6330450 | KD2-H4K8ac_peak_149 | 5.82799  |                                                   |
| 1 | 6389690 | 6390125 | KD2-H4K8ac_peak_150 | 9.32235  |                                                   |
| 1 | 6419115 | 6419662 | KD2-H4K8ac_peak_151 | 5.61067  |                                                   |
| 1 | 6420241 | 6420530 | KD2-H4K8ac_peak_152 | 8.58069  |                                                   |
| 1 | 6454080 | 6454288 | KD2-H4K8ac_peak_153 | 6.13909  | RP1-20208.3_ENSG00000271746;ACOT7_ENSG00000097021 |
| 1 | 6544848 | 6546594 | KD2-H4K8ac_peak_154 | 8.16906  |                                                   |
| 1 | 6550261 | 6551325 | KD2-H4K8ac_peak_155 | 8.10216  |                                                   |
| 1 | 6557016 | 6557395 | KD2-H4K8ac_peak_156 | 13.04385 |                                                   |
| 1 | 6566607 | 6566838 | KD2-H4K8ac_peak_157 | 6.0525   |                                                   |
| 1 | 6567410 | 6567640 | KD2-H4K8ac_peak_158 | 9.46843  |                                                   |
| 1 | 6567990 | 6568730 | KD2-H4K8ac_peak_159 | 12.08081 |                                                   |
| 1 | 6569906 | 6570195 | KD2-H4K8ac_peak_160 | 9.90914  |                                                   |
| 1 | 6570440 | 6571056 | KD2-H4K8ac_peak_161 | 8.58725  |                                                   |
| 1 | 6571327 | 6571876 | KD2-H4K8ac_peak_162 | 12.14909 |                                                   |
| 1 | 6572086 | 6572836 | KD2-H4K8ac_peak_163 | 7.07117  |                                                   |
| 1 | 6577847 | 6578272 | KD2-H4K8ac_peak_164 | 6.66692  |                                                   |
| 1 | 6579404 | 6580061 | KD2-H4K8ac_peak_165 | 4.67342  | PLEKHG5_ENSG00000171680                           |
| 1 | 6614109 | 6614527 | KD2-H4K8ac_peak_166 | 12.08081 | NOL9_ENSG00000162408;TAS1R1_ENSG00000173662       |
| 1 | 6614952 | 6615655 | KD2-H4K8ac_peak_167 | 11.50346 | NOL9_ENSG00000162408;TAS1R1_ENSG00000173662       |
| 1 | 6639373 | 6639852 | KD2-H4K8ac_peak_168 | 8.4716   | ZBTB48_ENSG00000204859                            |
| 1 | 6663084 | 6663458 | KD2-H4K8ac_peak_169 | 5.54647  |                                                   |
| 1 | 6673210 | 6673451 | KD2-H4K8ac_peak_170 | 7.40111  | PHF13_ENSG00000116273                             |
| 1 | 6673857 | 6674106 | KD2-H4K8ac_peak_171 | 7.98621  | KLHL21_ENSG00000162413;PHF13_ENSG00000116273      |
| 1 | 6674453 | 6674645 | KD2-H4K8ac_peak_172 | 8.49564  | KLHL21_ENSG00000162413;PHF13_ENSG00000116273      |
| 1 | 6685272 | 6685740 | KD2-H4K8ac_peak_173 | 13.09607 | THAP3_ENSG00000041988                             |
| 1 | 6761157 | 6761809 | KD2-H4K8ac_peak_174 | 12.06346 | DNAJC11_ENSG00000007923                           |
| 1 | 6990881 | 6991076 | KD2-H4K8ac_peak_175 | 5.57044  |                                                   |
| 1 | 7020360 | 7020561 | KD2-H4K8ac_peak_176 | 9.08816  |                                                   |
| 1 | 7325059 | 7325707 | KD2-H4K8ac_peak_177 | 9.36516  |                                                   |
| 1 | 7326694 | 7326997 | KD2-H4K8ac_peak_178 | 6.76298  |                                                   |
| 1 | 7351179 | 7351691 | KD2-H4K8ac_peak_179 | 4.68932  |                                                   |
| 1 | 7394297 | 7394597 | KD2-H4K8ac_peak_180 | 7.73418  |                                                   |
| 1 | 7396129 | 7396418 | KD2-H4K8ac_peak_181 | 11.03212 |                                                   |
| 1 | 7401206 | 7401974 | KD2-H4K8ac_peak_182 | 7.95563  |                                                   |



|   |         |         |                     |          |                                                      |
|---|---------|---------|---------------------|----------|------------------------------------------------------|
| 1 | 7439631 | 7439975 | KD2-H4K8ac_peak_183 | 8.17902  |                                                      |
| 1 | 7446009 | 7446285 | KD2-H4K8ac_peak_184 | 5.98124  |                                                      |
| 1 | 7448435 | 7449913 | KD2-H4K8ac_peak_185 | 7.07117  | RP3-453P22.2_ENSG00000237728                         |
| 1 | 7513751 | 7514072 | KD2-H4K8ac_peak_186 | 3.75035  |                                                      |
| 1 | 7517843 | 7518059 | KD2-H4K8ac_peak_187 | 7.01494  |                                                      |
| 1 | 7531536 | 7531782 | KD2-H4K8ac_peak_188 | 4.54006  |                                                      |
| 1 | 7536459 | 7537330 | KD2-H4K8ac_peak_189 | 10.05606 |                                                      |
| 1 | 7537654 | 7538221 | KD2-H4K8ac_peak_190 | 13.81781 |                                                      |
| 1 | 7538922 | 7539316 | KD2-H4K8ac_peak_191 | 13.73574 |                                                      |
| 1 | 7560962 | 7561497 | KD2-H4K8ac_peak_192 | 9.11031  |                                                      |
| 1 | 7568910 | 7569149 | KD2-H4K8ac_peak_193 | 12.06346 |                                                      |
| 1 | 7584802 | 7585247 | KD2-H4K8ac_peak_194 | 9.85259  |                                                      |
| 1 | 7594544 | 7594918 | KD2-H4K8ac_peak_195 | 9.08816  |                                                      |
| 1 | 7597099 | 7597689 | KD2-H4K8ac_peak_196 | 5.88845  |                                                      |
| 1 | 7616551 | 7616810 | KD2-H4K8ac_peak_197 | 4.8888   |                                                      |
| 1 | 7617682 | 7618053 | KD2-H4K8ac_peak_198 | 8.85813  |                                                      |
| 1 | 7618388 | 7618811 | KD2-H4K8ac_peak_199 | 14.71663 |                                                      |
| 1 | 7619017 | 7619393 | KD2-H4K8ac_peak_200 | 9.11891  |                                                      |
| 1 | 7620212 | 7620415 | KD2-H4K8ac_peak_201 | 6.72624  |                                                      |
| 1 | 7621060 | 7621477 | KD2-H4K8ac_peak_202 | 10.19723 |                                                      |
| 1 | 7642106 | 7642414 | KD2-H4K8ac_peak_203 | 7.42204  |                                                      |
| 1 | 7645604 | 7647504 | KD2-H4K8ac_peak_204 | 17.76565 |                                                      |
| 1 | 7647736 | 7647948 | KD2-H4K8ac_peak_205 | 7.76329  |                                                      |
| 1 | 7688856 | 7689110 | KD2-H4K8ac_peak_206 | 3.83717  |                                                      |
| 1 | 7690807 | 7691802 | KD2-H4K8ac_peak_207 | 9.07715  |                                                      |
| 1 | 7692713 | 7693611 | KD2-H4K8ac_peak_208 | 6.95649  |                                                      |
| 1 | 7706943 | 7707203 | KD2-H4K8ac_peak_209 | 11.79585 |                                                      |
| 1 | 7727525 | 7728376 | KD2-H4K8ac_peak_210 | 15.61791 |                                                      |
| 1 | 7728863 | 7730931 | KD2-H4K8ac_peak_211 | 22.93827 |                                                      |
| 1 | 7732012 | 7732476 | KD2-H4K8ac_peak_212 | 4.06758  |                                                      |
| 1 | 7733363 | 7733608 | KD2-H4K8ac_peak_213 | 7.146    |                                                      |
| 1 | 7739800 | 7741576 | KD2-H4K8ac_peak_214 | 19.66144 |                                                      |
| 1 | 7764265 | 7764558 | KD2-H4K8ac_peak_215 | 12.30509 |                                                      |
| 1 | 7764811 | 7765634 | KD2-H4K8ac_peak_216 | 6.0073   |                                                      |
| 1 | 7813235 | 7813470 | KD2-H4K8ac_peak_217 | 4.09222  |                                                      |
| 1 | 7831388 | 7831678 | KD2-H4K8ac_peak_218 | 12.99417 | VAMP3_ENSG00000049245                                |
| 1 | 8013641 | 8014708 | KD2-H4K8ac_peak_219 | 18.5703  | PARK7_ENSG00000116288                                |
| 1 | 8085727 | 8086277 | KD2-H4K8ac_peak_220 | 9.72244  | ERRF11_ENSG00000116285;RP11-431K24.1_ENSG00000238290 |
| 1 | 8086490 | 8087036 | KD2-H4K8ac_peak_221 | 18.94636 | ERRF11_ENSG00000116285;RP11-431K24.1_ENSG00000238290 |
| 1 | 8229375 | 8229753 | KD2-H4K8ac_peak_222 | 7.1181   |                                                      |
| 1 | 8230189 | 8230698 | KD2-H4K8ac_peak_223 | 9.402    |                                                      |
| 1 | 8377717 | 8378641 | KD2-H4K8ac_peak_224 | 15.80947 | SLC45A1_ENSG00000162426                              |
| 1 | 8483481 | 8483738 | KD2-H4K8ac_peak_225 | 6.84261  | RP5-1115A15.1_ENSG00000232912                        |
| 1 | 8762892 | 8763324 | KD2-H4K8ac_peak_226 | 14.66631 |                                                      |
| 1 | 8877031 | 8877605 | KD2-H4K8ac_peak_227 | 6.66692  | RERE_ENSG00000142599                                 |
| 1 | 8877987 | 8878670 | KD2-H4K8ac_peak_228 | 11.81257 | RERE_ENSG00000142599                                 |

|   |          |          |                     |          |                                                                                 |
|---|----------|----------|---------------------|----------|---------------------------------------------------------------------------------|
| 1 | 8882454  | 8882659  | KD2-H4K8ac_peak_229 | 6.40683  |                                                                                 |
| 1 | 8882903  | 8883274  | KD2-H4K8ac_peak_230 | 6.07178  |                                                                                 |
| 1 | 8938344  | 8938707  | KD2-H4K8ac_peak_231 | 7.36799  | ENO1_ENSG00000074800;ENO1-IT1_ENSG00000236269;ENO1-AS1_ENSG00000230679          |
| 1 | 8938919  | 8939239  | KD2-H4K8ac_peak_232 | 11.00372 | ENO1_ENSG00000074800;ENO1-IT1_ENSG00000236269;ENO1-AS1_ENSG00000230679          |
| 1 | 9189525  | 9189893  | KD2-H4K8ac_peak_233 | 5.9696   | GPR157_ENSG00000180758                                                          |
| 1 | 9242062  | 9243234  | KD2-H4K8ac_peak_234 | 8.73935  | RP3-510D11.2_ENSG00000234546                                                    |
| 1 | 9294865  | 9295363  | KD2-H4K8ac_peak_235 | 15.22643 | H6PD_ENSG00000049239                                                            |
| 1 | 9488601  | 9488928  | KD2-H4K8ac_peak_236 | 9.08816  |                                                                                 |
| 1 | 9554992  | 9555747  | KD2-H4K8ac_peak_237 | 12.99417 |                                                                                 |
| 1 | 9598806  | 9599186  | KD2-H4K8ac_peak_238 | 10.08707 | SLC25A33_ENSG00000171612                                                        |
| 1 | 9663906  | 9664205  | KD2-H4K8ac_peak_239 | 10.16666 |                                                                                 |
| 1 | 9664502  | 9664821  | KD2-H4K8ac_peak_240 | 10.09705 |                                                                                 |
| 1 | 9665592  | 9666061  | KD2-H4K8ac_peak_241 | 12.43831 |                                                                                 |
| 1 | 9672804  | 9673205  | KD2-H4K8ac_peak_242 | 4.54006  |                                                                                 |
| 1 | 9686704  | 9687793  | KD2-H4K8ac_peak_243 | 18.86697 |                                                                                 |
| 1 | 9747289  | 9747848  | KD2-H4K8ac_peak_244 | 6.99815  | RP11-558F24.4_ENSG00000231789                                                   |
| 1 | 9749162  | 9749474  | KD2-H4K8ac_peak_245 | 10.08707 |                                                                                 |
| 1 | 9749677  | 9750181  | KD2-H4K8ac_peak_246 | 5.82869  |                                                                                 |
| 1 | 9777567  | 9777825  | KD2-H4K8ac_peak_247 | 5.88845  |                                                                                 |
| 1 | 9784918  | 9785186  | KD2-H4K8ac_peak_248 | 6.56211  |                                                                                 |
| 1 | 9883444  | 9883982  | KD2-H4K8ac_peak_249 | 12.08081 | CLSTN1_ENSG00000171603                                                          |
| 1 | 9884293  | 9884849  | KD2-H4K8ac_peak_250 | 13.95627 | CLSTN1_ENSG00000171603                                                          |
| 1 | 9970940  | 9971132  | KD2-H4K8ac_peak_251 | 6.00226  | CTNNBIP1_ENSG00000178585                                                        |
| 1 | 10002819 | 10003377 | KD2-H4K8ac_peak_252 | 6.83936  | LZIC_ENSG00000162441;RP11-84A14.4_ENSG00000228150;NMNAT1_ENSG00000173614        |
| 1 | 10003711 | 10004266 | KD2-H4K8ac_peak_253 | 7.13615  | LZIC_ENSG00000162441;RP11-84A14.4_ENSG00000228150;NMNAT1_ENSG00000173614        |
| 1 | 10057326 | 10057544 | KD2-H4K8ac_peak_254 | 10.21502 | RBP7_ENSG00000162444                                                            |
| 1 | 10057829 | 10058108 | KD2-H4K8ac_peak_255 | 8.17902  | RBP7_ENSG00000162444                                                            |
| 1 | 10092008 | 10092650 | KD2-H4K8ac_peak_256 | 11.85362 | UBE4B_ENSG00000130939                                                           |
| 1 | 10093097 | 10093441 | KD2-H4K8ac_peak_257 | 4.54006  | UBE4B_ENSG00000130939                                                           |
| 1 | 10269931 | 10270374 | KD2-H4K8ac_peak_258 | 18.80827 | KIF1B_ENSG00000054523                                                           |
| 1 | 10270701 | 10271640 | KD2-H4K8ac_peak_259 | 5.54647  | KIF1B_ENSG00000054523                                                           |
| 1 | 10399620 | 10400011 | KD2-H4K8ac_peak_260 | 10.0692  |                                                                                 |
| 1 | 10400496 | 10400703 | KD2-H4K8ac_peak_261 | 4.06758  |                                                                                 |
| 1 | 10490221 | 10490664 | KD2-H4K8ac_peak_262 | 9.73431  | RP4-736L20.3_ENSG00000271989;APITD1_ENSG00000175279;APITD1-CORT_ENSG00000251503 |
| 1 | 10490923 | 10491303 | KD2-H4K8ac_peak_263 | 5.14125  | RP4-736L20.3_ENSG00000271989;APITD1_ENSG00000175279;APITD1-CORT_ENSG00000251503 |
| 1 | 10533319 | 10533586 | KD2-H4K8ac_peak_264 | 6.33462  | DFFA_ENSG00000160049;PEX14_ENSG00000142655                                      |
| 1 | 10534377 | 10534771 | KD2-H4K8ac_peak_265 | 8.23274  |                                                                                 |
| 1 | 10685858 | 10686057 | KD2-H4K8ac_peak_266 | 9.96798  |                                                                                 |
| 1 | 10686378 | 10686683 | KD2-H4K8ac_peak_267 | 6.4562   |                                                                                 |
| 1 | 10687004 | 10687262 | KD2-H4K8ac_peak_268 | 7.1733   |                                                                                 |
| 1 | 10694887 | 10695330 | KD2-H4K8ac_peak_269 | 6.99815  |                                                                                 |
| 1 | 10696083 | 10696530 | KD2-H4K8ac_peak_270 | 5.61067  |                                                                                 |
| 1 | 10700110 | 10700304 | KD2-H4K8ac_peak_271 | 10.4923  | RP4-734G22.3_ENSG00000272078                                                    |
| 1 | 10700648 | 10701698 | KD2-H4K8ac_peak_272 | 7.76329  |                                                                                 |
| 1 | 10707572 | 10707892 | KD2-H4K8ac_peak_273 | 4.211    |                                                                                 |
| 1 | 10723720 | 10724060 | KD2-H4K8ac_peak_274 | 6.48713  |                                                                                 |

|   |          |          |                     |          |                                                      |
|---|----------|----------|---------------------|----------|------------------------------------------------------|
| 1 | 10731633 | 10731951 | KD2-H4K8ac_peak_275 | 5.51783  |                                                      |
| 1 | 10739304 | 10739637 | KD2-H4K8ac_peak_276 | 5.30799  |                                                      |
| 1 | 10741456 | 10741980 | KD2-H4K8ac_peak_277 | 5.01002  |                                                      |
| 1 | 10745664 | 10745968 | KD2-H4K8ac_peak_278 | 12.84642 |                                                      |
| 1 | 10753936 | 10754300 | KD2-H4K8ac_peak_279 | 7.27716  |                                                      |
| 1 | 10926876 | 10927090 | KD2-H4K8ac_peak_280 | 6.05809  |                                                      |
| 1 | 10927415 | 10927779 | KD2-H4K8ac_peak_281 | 21.75906 |                                                      |
| 1 | 10948443 | 10948650 | KD2-H4K8ac_peak_282 | 6.89708  |                                                      |
| 1 | 10948962 | 10949238 | KD2-H4K8ac_peak_283 | 4.24345  |                                                      |
| 1 | 10950109 | 10951021 | KD2-H4K8ac_peak_284 | 5.54647  |                                                      |
| 1 | 10958270 | 10958865 | KD2-H4K8ac_peak_285 | 10.78136 |                                                      |
| 1 | 10959842 | 10960450 | KD2-H4K8ac_peak_286 | 6.99815  |                                                      |
| 1 | 10960672 | 10962819 | KD2-H4K8ac_peak_287 | 16.89963 |                                                      |
| 1 | 10963107 | 10963302 | KD2-H4K8ac_peak_288 | 4.26323  |                                                      |
| 1 | 10963578 | 10965122 | KD2-H4K8ac_peak_289 | 29.1888  |                                                      |
| 1 | 10966063 | 10966810 | KD2-H4K8ac_peak_290 | 25.82946 |                                                      |
| 1 | 10969004 | 10969237 | KD2-H4K8ac_peak_291 | 8.39745  |                                                      |
| 1 | 10969538 | 10969805 | KD2-H4K8ac_peak_292 | 8.49564  |                                                      |
| 1 | 10970084 | 10970950 | KD2-H4K8ac_peak_293 | 17.70837 |                                                      |
| 1 | 10971165 | 10971791 | KD2-H4K8ac_peak_294 | 9.95119  |                                                      |
| 1 | 11001100 | 11001396 | KD2-H4K8ac_peak_295 | 5.70596  |                                                      |
| 1 | 11001775 | 11002224 | KD2-H4K8ac_peak_296 | 14.84212 |                                                      |
| 1 | 11003516 | 11004006 | KD2-H4K8ac_peak_297 | 7.1181   |                                                      |
| 1 | 11004799 | 11006232 | KD2-H4K8ac_peak_298 | 13.6476  |                                                      |
| 1 | 11006563 | 11006786 | KD2-H4K8ac_peak_299 | 8.4716   |                                                      |
| 1 | 11007823 | 11008298 | KD2-H4K8ac_peak_300 | 8.30974  |                                                      |
| 1 | 11020557 | 11020781 | KD2-H4K8ac_peak_301 | 7.13615  |                                                      |
| 1 | 11072519 | 11073078 | KD2-H4K8ac_peak_302 | 9.20193  | TARDBP_ENSG00000120948                               |
| 1 | 11113101 | 11113441 | KD2-H4K8ac_peak_303 | 5.53033  |                                                      |
| 1 | 11119684 | 11119916 | KD2-H4K8ac_peak_304 | 9.11876  | SRM_ENSG00000116649                                  |
| 1 | 11159410 | 11160715 | KD2-H4K8ac_peak_305 | 10.19949 | EXOSC10_ENSG00000171824;RP4-635E18.6_ENSG00000230337 |
| 1 | 11322175 | 11322548 | KD2-H4K8ac_peak_306 | 9.95119  | MTOR_ENSG00000198793                                 |
| 1 | 11323216 | 11323719 | KD2-H4K8ac_peak_307 | 12.65964 | MTOR_ENSG00000198793                                 |
| 1 | 11333284 | 11333788 | KD2-H4K8ac_peak_308 | 18.5703  | UBIAD1_ENSG00000120942                               |
| 1 | 11361552 | 11361796 | KD2-H4K8ac_peak_309 | 6.0073   |                                                      |
| 1 | 11372132 | 11372462 | KD2-H4K8ac_peak_310 | 4.98318  |                                                      |
| 1 | 11398310 | 11398569 | KD2-H4K8ac_peak_311 | 10.81728 |                                                      |
| 1 | 11400086 | 11400604 | KD2-H4K8ac_peak_312 | 10.96455 |                                                      |
| 1 | 11405426 | 11405646 | KD2-H4K8ac_peak_313 | 6.08655  |                                                      |
| 1 | 11436756 | 11436951 | KD2-H4K8ac_peak_314 | 6.39197  |                                                      |
| 1 | 11513974 | 11514235 | KD2-H4K8ac_peak_315 | 4.73543  |                                                      |
| 1 | 11518636 | 11519025 | KD2-H4K8ac_peak_316 | 4.8888   |                                                      |
| 1 | 11519245 | 11519594 | KD2-H4K8ac_peak_317 | 8.36432  |                                                      |
| 1 | 11538969 | 11539554 | KD2-H4K8ac_peak_318 | 10.44656 | PTCHD2_ENSG00000204624                               |
| 1 | 11623391 | 11623723 | KD2-H4K8ac_peak_319 | 11.86082 |                                                      |
| 1 | 11710828 | 11711052 | KD2-H4K8ac_peak_320 | 6.0605   |                                                      |

|   |          |          |                     |          |                                                     |
|---|----------|----------|---------------------|----------|-----------------------------------------------------|
| 1 | 11741280 | 11741548 | KD2-H4K8ac_peak_321 | 9.80695  |                                                     |
| 1 | 11750783 | 11751225 | KD2-H4K8ac_peak_322 | 6.04107  | MAD2L2_ENSG00000116670;DRAXIN_ENSG00000162490       |
| 1 | 11761190 | 11761423 | KD2-H4K8ac_peak_323 | 5.30799  |                                                     |
| 1 | 11779465 | 11779998 | KD2-H4K8ac_peak_324 | 4.06758  |                                                     |
| 1 | 11796248 | 11796645 | KD2-H4K8ac_peak_325 | 6.65673  | AGTRAP_ENSG00000177674                              |
| 1 | 11824330 | 11824685 | KD2-H4K8ac_peak_326 | 7.36799  |                                                     |
| 1 | 11828216 | 11828441 | KD2-H4K8ac_peak_327 | 9.11031  |                                                     |
| 1 | 11865313 | 11865939 | KD2-H4K8ac_peak_328 | 13.13969 | CLCN6_ENSG00000011021                               |
| 1 | 11901539 | 11901833 | KD2-H4K8ac_peak_329 | 6.4562   | NPPA-AS1_ENSG00000242349                            |
| 1 | 11907155 | 11907404 | KD2-H4K8ac_peak_330 | 6.66692  | NPPA_ENSG00000175206                                |
| 1 | 11907627 | 11907824 | KD2-H4K8ac_peak_331 | 5.61067  | NPPA_ENSG00000175206                                |
| 1 | 11908499 | 11908737 | KD2-H4K8ac_peak_332 | 9.15069  | NPPA_ENSG00000175206                                |
| 1 | 11939873 | 11940522 | KD2-H4K8ac_peak_333 | 10.7186  |                                                     |
| 1 | 11941525 | 11941977 | KD2-H4K8ac_peak_334 | 10.65724 |                                                     |
| 1 | 11943137 | 11943730 | KD2-H4K8ac_peak_335 | 8.10216  |                                                     |
| 1 | 11968710 | 11969012 | KD2-H4K8ac_peak_336 | 6.40297  | RNU5E-1_ENSG00000199347;RNU5E-4P_ENSG00000201801    |
| 1 | 11985805 | 11986290 | KD2-H4K8ac_peak_337 | 5.88845  | KIAA2013_ENSG00000116685                            |
| 1 | 11986821 | 11987034 | KD2-H4K8ac_peak_338 | 5.88845  | KIAA2013_ENSG00000116685                            |
| 1 | 11991088 | 11991454 | KD2-H4K8ac_peak_339 | 8.02571  |                                                     |
| 1 | 11994088 | 11994544 | KD2-H4K8ac_peak_340 | 10.53377 | PLOD1_ENSG00000083444                               |
| 1 | 11994778 | 11995036 | KD2-H4K8ac_peak_341 | 10.65724 | PLOD1_ENSG00000083444                               |
| 1 | 11995629 | 11995831 | KD2-H4K8ac_peak_342 | 7.48822  |                                                     |
| 1 | 11998485 | 11998768 | KD2-H4K8ac_peak_343 | 4.76709  |                                                     |
| 1 | 12004665 | 12005386 | KD2-H4K8ac_peak_344 | 7.76104  |                                                     |
| 1 | 12011065 | 12011261 | KD2-H4K8ac_peak_345 | 4.42765  |                                                     |
| 1 | 12040329 | 12040933 | KD2-H4K8ac_peak_346 | 9.34195  | MFN2_ENSG00000116688                                |
| 1 | 12079910 | 12080127 | KD2-H4K8ac_peak_347 | 7.07117  | MHP_ENSG00000116691                                 |
| 1 | 12114103 | 12114913 | KD2-H4K8ac_peak_348 | 10.96455 |                                                     |
| 1 | 12167146 | 12167398 | KD2-H4K8ac_peak_349 | 5.29352  |                                                     |
| 1 | 12215060 | 12215393 | KD2-H4K8ac_peak_350 | 6.24114  |                                                     |
| 1 | 12243956 | 12246085 | KD2-H4K8ac_peak_351 | 19.33018 |                                                     |
| 1 | 12265209 | 12265426 | KD2-H4K8ac_peak_352 | 6.99815  |                                                     |
| 1 | 12289604 | 12289894 | KD2-H4K8ac_peak_353 | 5.54647  | VPS13D_ENSG00000048707                              |
| 1 | 12290180 | 12290474 | KD2-H4K8ac_peak_354 | 13.27022 | VPS13D_ENSG00000048707                              |
| 1 | 12496277 | 12496600 | KD2-H4K8ac_peak_355 | 4.59928  |                                                     |
| 1 | 12533404 | 12533985 | KD2-H4K8ac_peak_356 | 7.1181   |                                                     |
| 1 | 12537760 | 12538369 | KD2-H4K8ac_peak_357 | 5.54647  |                                                     |
| 1 | 12538687 | 12539446 | KD2-H4K8ac_peak_358 | 9.20193  |                                                     |
| 1 | 12541029 | 12541254 | KD2-H4K8ac_peak_359 | 4.42765  |                                                     |
| 1 | 12580797 | 12581039 | KD2-H4K8ac_peak_360 | 10.21502 |                                                     |
| 1 | 12655025 | 12655328 | KD2-H4K8ac_peak_361 | 15.61313 |                                                     |
| 1 | 12656104 | 12656401 | KD2-H4K8ac_peak_362 | 17.10757 |                                                     |
| 1 | 12678087 | 12678578 | KD2-H4K8ac_peak_363 | 11.89502 | DHRS3_ENSG00000162496;RP11-474O21.5_ENSG00000272482 |
| 1 | 14026181 | 14027230 | KD2-H4K8ac_peak_364 | 12.42761 | PRDM2_ENSG00000116731                               |
| 1 | 14075275 | 14075623 | KD2-H4K8ac_peak_365 | 6.25869  |                                                     |
| 1 | 15250304 | 15250509 | KD2-H4K8ac_peak_366 | 6.99815  |                                                     |

|   |          |          |                     |          |                                                                                |
|---|----------|----------|---------------------|----------|--------------------------------------------------------------------------------|
| 1 | 15250739 | 15250936 | KD2-H4K8ac_peak_367 | 8.02571  |                                                                                |
| 1 | 15251202 | 15251561 | KD2-H4K8ac_peak_368 | 7.47462  |                                                                                |
| 1 | 15270333 | 15270553 | KD2-H4K8ac_peak_369 | 5.57044  |                                                                                |
| 1 | 15270867 | 15271638 | KD2-H4K8ac_peak_370 | 14.275   |                                                                                |
| 1 | 15272243 | 15272798 | KD2-H4K8ac_peak_371 | 10.29842 |                                                                                |
| 1 | 15273252 | 15273981 | KD2-H4K8ac_peak_372 | 7.58939  |                                                                                |
| 1 | 15276163 | 15276436 | KD2-H4K8ac_peak_373 | 5.66317  |                                                                                |
| 1 | 15295040 | 15295246 | KD2-H4K8ac_peak_374 | 5.14125  |                                                                                |
| 1 | 15466733 | 15467094 | KD2-H4K8ac_peak_375 | 8.55271  |                                                                                |
| 1 | 15467569 | 15467808 | KD2-H4K8ac_peak_376 | 8.74596  |                                                                                |
| 1 | 15477601 | 15477867 | KD2-H4K8ac_peak_377 | 8.86787  |                                                                                |
| 1 | 15478554 | 15478882 | KD2-H4K8ac_peak_378 | 9.89383  | TMEM51-AS1_ENSG00000175147;TMEM51_ENSG00000171729                              |
| 1 | 15479319 | 15480029 | KD2-H4K8ac_peak_379 | 9.07715  | TMEM51-AS1_ENSG00000175147;TMEM51_ENSG00000171729                              |
| 1 | 15505281 | 15505692 | KD2-H4K8ac_peak_380 | 5.20908  |                                                                                |
| 1 | 15506520 | 15506712 | KD2-H4K8ac_peak_381 | 8.30974  |                                                                                |
| 1 | 15512380 | 15512630 | KD2-H4K8ac_peak_382 | 6.00226  |                                                                                |
| 1 | 15513287 | 15513539 | KD2-H4K8ac_peak_383 | 8.30974  |                                                                                |
| 1 | 15514255 | 15514500 | KD2-H4K8ac_peak_384 | 5.14125  |                                                                                |
| 1 | 15514803 | 15515098 | KD2-H4K8ac_peak_385 | 6.98292  |                                                                                |
| 1 | 15533576 | 15533798 | KD2-H4K8ac_peak_386 | 3.75035  |                                                                                |
| 1 | 15573733 | 15574086 | KD2-H4K8ac_peak_387 | 7.69287  | FHAD1_ENSG00000142621                                                          |
| 1 | 15851108 | 15851326 | KD2-H4K8ac_peak_388 | 14.15075 |                                                                                |
| 1 | 15853385 | 15853654 | KD2-H4K8ac_peak_389 | 5.81222  | CASP9_ENSG00000132906;DNAJC16_ENSG00000116138                                  |
| 1 | 15910703 | 15910945 | KD2-H4K8ac_peak_390 | 3.7063   | AGMAT_ENSG00000116771                                                          |
| 1 | 15911467 | 15911895 | KD2-H4K8ac_peak_391 | 9.34989  | AGMAT_ENSG00000116771                                                          |
| 1 | 15930254 | 15930809 | KD2-H4K8ac_peak_392 | 5.66705  | RP4-680D5.2_ENSG00000237301;CHCHD2P6_ENSG00000235084                           |
| 1 | 15944055 | 15944418 | KD2-H4K8ac_peak_393 | 7.76329  | DDI2_ENSG00000197312                                                           |
| 1 | 16010031 | 16010797 | KD2-H4K8ac_peak_394 | 27.43676 | RP4-680D5.9_ENSG00000271742;PLEKHM2_ENSG00000116786;AL121992.1_ENSG00000264048 |
| 1 | 16011101 | 16011554 | KD2-H4K8ac_peak_395 | 5.30799  | PLEKHM2_ENSG00000116786;AL121992.1_ENSG00000264048                             |
| 1 | 16064843 | 16065130 | KD2-H4K8ac_peak_396 | 6.99815  |                                                                                |
| 1 | 16065918 | 16066122 | KD2-H4K8ac_peak_397 | 5.40356  |                                                                                |
| 1 | 16075594 | 16075957 | KD2-H4K8ac_peak_398 | 14.66631 | RP11-169K16.4_ENSG00000224459                                                  |
| 1 | 16083806 | 16084166 | KD2-H4K8ac_peak_399 | 7.36799  | FBLIM1_ENSG00000162458                                                         |
| 1 | 16085396 | 16086100 | KD2-H4K8ac_peak_400 | 14.66631 |                                                                                |
| 1 | 16159754 | 16159969 | KD2-H4K8ac_peak_401 | 7.27716  |                                                                                |
| 1 | 16160993 | 16162238 | KD2-H4K8ac_peak_402 | 21.57439 |                                                                                |
| 1 | 16176098 | 16176588 | KD2-H4K8ac_peak_403 | 6.92624  |                                                                                |
| 1 | 16302343 | 16302831 | KD2-H4K8ac_peak_404 | 30.77376 | ZBTB17_ENSG00000116809                                                         |
| 1 | 16303332 | 16303619 | KD2-H4K8ac_peak_405 | 4.77079  | ZBTB17_ENSG00000116809                                                         |
| 1 | 16339430 | 16340137 | KD2-H4K8ac_peak_406 | 23.66011 |                                                                                |
| 1 | 16340471 | 16340845 | KD2-H4K8ac_peak_407 | 5.02474  |                                                                                |
| 1 | 16342283 | 16342505 | KD2-H4K8ac_peak_408 | 4.85088  |                                                                                |
| 1 | 16343918 | 16344969 | KD2-H4K8ac_peak_409 | 9.07715  | CLCNKA_ENSG00000186510                                                         |
| 1 | 16399600 | 16400355 | KD2-H4K8ac_peak_410 | 14.56955 | FAM131C_ENSG00000185519                                                        |
| 1 | 16405642 | 16406121 | KD2-H4K8ac_peak_411 | 5.30799  |                                                                                |
| 1 | 16414329 | 16414567 | KD2-H4K8ac_peak_412 | 3.75035  |                                                                                |

|   |          |          |                     |          |                                                     |
|---|----------|----------|---------------------|----------|-----------------------------------------------------|
| 1 | 16468070 | 16468433 | KD2-H4K8ac_peak_413 | 6.40683  |                                                     |
| 1 | 16481414 | 16481790 | KD2-H4K8ac_peak_414 | 8.20667  | EPHA2_ENSG00000142627;RP11-276H7.2_ENSG00000227959  |
| 1 | 16482114 | 16482327 | KD2-H4K8ac_peak_415 | 5.72327  | EPHA2_ENSG00000142627;RP11-276H7.2_ENSG00000227959  |
| 1 | 16493572 | 16494466 | KD2-H4K8ac_peak_416 | 13.12608 |                                                     |
| 1 | 16500765 | 16501178 | KD2-H4K8ac_peak_417 | 11.90231 |                                                     |
| 1 | 16501490 | 16502592 | KD2-H4K8ac_peak_418 | 9.95119  |                                                     |
| 1 | 16502854 | 16503525 | KD2-H4K8ac_peak_419 | 13.73635 |                                                     |
| 1 | 16532124 | 16532976 | KD2-H4K8ac_peak_420 | 5.75757  |                                                     |
| 1 | 16533673 | 16534211 | KD2-H4K8ac_peak_421 | 8.55271  |                                                     |
| 1 | 16535151 | 16535448 | KD2-H4K8ac_peak_422 | 4.82973  |                                                     |
| 1 | 16542988 | 16543190 | KD2-H4K8ac_peak_423 | 4.56666  |                                                     |
| 1 | 16563324 | 16564335 | KD2-H4K8ac_peak_424 | 17.75427 | RSG1_ENSG00000132881                                |
| 1 | 16574648 | 16575329 | KD2-H4K8ac_peak_425 | 5.14125  |                                                     |
| 1 | 16678537 | 16678825 | KD2-H4K8ac_peak_426 | 3.86308  | FBXO42_ENSG00000037637;SZRD1_ENSG00000055070        |
| 1 | 16692557 | 16693210 | KD2-H4K8ac_peak_427 | 7.76329  |                                                     |
| 1 | 16693718 | 16694227 | KD2-H4K8ac_peak_428 | 19.33018 |                                                     |
| 1 | 16766749 | 16767037 | KD2-H4K8ac_peak_429 | 11.05467 | NECAP2_ENSG00000157191                              |
| 1 | 16767307 | 16767580 | KD2-H4K8ac_peak_430 | 8.58069  | NECAP2_ENSG00000157191                              |
| 1 | 16825086 | 16825694 | KD2-H4K8ac_peak_431 | 13.73635 | CROCCP3_ENSG00000080947                             |
| 1 | 16825909 | 16826377 | KD2-H4K8ac_peak_432 | 11.79585 | CROCCP3_ENSG00000080947                             |
| 1 | 16840779 | 16840987 | KD2-H4K8ac_peak_433 | 11.05467 | RNU1-1_ENSG00000206652;RP4-798A10.7_ENSG00000261135 |
| 1 | 16887509 | 16888074 | KD2-H4K8ac_peak_434 | 12.96622 |                                                     |
| 1 | 16939393 | 16939614 | KD2-H4K8ac_peak_435 | 9.13332  | NBPF1_ENSG00000219481                               |
| 1 | 16939810 | 16940553 | KD2-H4K8ac_peak_436 | 39.28297 | NBPF1_ENSG00000219481                               |
| 1 | 16970587 | 16972468 | KD2-H4K8ac_peak_437 | 41.21368 | CROCCP2_ENSG00000215908;MST1P2_ENSG00000186301      |
| 1 | 17026283 | 17026646 | KD2-H4K8ac_peak_438 | 5.00796  |                                                     |
| 1 | 17030393 | 17030707 | KD2-H4K8ac_peak_439 | 6.77963  |                                                     |
| 1 | 17034273 | 17034720 | KD2-H4K8ac_peak_440 | 16.42728 |                                                     |
| 1 | 17090733 | 17091150 | KD2-H4K8ac_peak_441 | 8.17557  |                                                     |
| 1 | 17222957 | 17223555 | KD2-H4K8ac_peak_442 | 16.67374 | RNU1-2_ENSG00000207005                              |
| 1 | 17229485 | 17230038 | KD2-H4K8ac_peak_443 | 6.2827   |                                                     |
| 1 | 17230553 | 17230838 | KD2-H4K8ac_peak_444 | 5.59859  | RP11-108M9.6_ENSG00000272426                        |
| 1 | 17231116 | 17231673 | KD2-H4K8ac_peak_445 | 12.45682 | RP11-108M9.6_ENSG00000272426                        |
| 1 | 17232522 | 17233042 | KD2-H4K8ac_peak_446 | 7.86315  |                                                     |
| 1 | 17240133 | 17240347 | KD2-H4K8ac_peak_447 | 11.19666 |                                                     |
| 1 | 17240719 | 17241412 | KD2-H4K8ac_peak_448 | 33.50961 |                                                     |
| 1 | 17247689 | 17248966 | KD2-H4K8ac_peak_449 | 14.43794 |                                                     |
| 1 | 17286718 | 17288089 | KD2-H4K8ac_peak_450 | 15.53798 |                                                     |
| 1 | 17294049 | 17294333 | KD2-H4K8ac_peak_451 | 5.30799  |                                                     |
| 1 | 17304619 | 17305204 | KD2-H4K8ac_peak_452 | 10.05606 | RP1-37C10.3_ENSG00000226526                         |
| 1 | 17305525 | 17306637 | KD2-H4K8ac_peak_453 | 15.13261 | MFAP2_ENSG00000117122;RP1-37C10.3_ENSG00000226526   |
| 1 | 17306861 | 17307634 | KD2-H4K8ac_peak_454 | 15.9754  | MFAP2_ENSG00000117122                               |
| 1 | 17380901 | 17381346 | KD2-H4K8ac_peak_455 | 8.4716   | SDHB_ENSG00000117118                                |
| 1 | 17446140 | 17446592 | KD2-H4K8ac_peak_456 | 6.66692  | PADI2_ENSG00000117115                               |
| 1 | 17764560 | 17765042 | KD2-H4K8ac_peak_457 | 15.09202 |                                                     |
| 1 | 17765261 | 17765776 | KD2-H4K8ac_peak_458 | 5.13615  | RCC2_ENSG00000179051                                |

|   |          |          |                     |          |                                                                                 |
|---|----------|----------|---------------------|----------|---------------------------------------------------------------------------------|
| 1 | 17828813 | 17829257 | KD2-H4K8ac_peak_459 | 6.56926  |                                                                                 |
| 1 | 17865648 | 17866715 | KD2-H4K8ac_peak_460 | 25.10776 | ARHGEF10L_ENSG00000074964                                                       |
| 1 | 17867029 | 17867605 | KD2-H4K8ac_peak_461 | 6.97919  | ARHGEF10L_ENSG00000074964                                                       |
| 1 | 17913783 | 17914330 | KD2-H4K8ac_peak_462 | 6.20982  |                                                                                 |
| 1 | 17914902 | 17915262 | KD2-H4K8ac_peak_463 | 9.1707   |                                                                                 |
| 1 | 17915768 | 17915967 | KD2-H4K8ac_peak_464 | 4.62142  |                                                                                 |
| 1 | 17916684 | 17917006 | KD2-H4K8ac_peak_465 | 5.08628  |                                                                                 |
| 1 | 17918239 | 17918601 | KD2-H4K8ac_peak_466 | 4.98072  |                                                                                 |
| 1 | 17919786 | 17920484 | KD2-H4K8ac_peak_467 | 13.58431 |                                                                                 |
| 1 | 17920918 | 17921302 | KD2-H4K8ac_peak_468 | 6.98517  |                                                                                 |
| 1 | 17921868 | 17922293 | KD2-H4K8ac_peak_469 | 7.36799  |                                                                                 |
| 1 | 17922881 | 17923624 | KD2-H4K8ac_peak_470 | 7.45501  |                                                                                 |
| 1 | 17923868 | 17924344 | KD2-H4K8ac_peak_471 | 8.30974  |                                                                                 |
| 1 | 17929088 | 17929638 | KD2-H4K8ac_peak_472 | 10.05606 |                                                                                 |
| 1 | 17998386 | 17998615 | KD2-H4K8ac_peak_473 | 8.26129  |                                                                                 |
| 1 | 18027378 | 18027625 | KD2-H4K8ac_peak_474 | 6.83936  |                                                                                 |
| 1 | 18098987 | 18099239 | KD2-H4K8ac_peak_475 | 5.57044  |                                                                                 |
| 1 | 18099646 | 18099839 | KD2-H4K8ac_peak_476 | 5.51783  |                                                                                 |
| 1 | 18101949 | 18102185 | KD2-H4K8ac_peak_477 | 4.66652  |                                                                                 |
| 1 | 18104275 | 18104581 | KD2-H4K8ac_peak_478 | 4.66652  |                                                                                 |
| 1 | 18461064 | 18461356 | KD2-H4K8ac_peak_479 | 9.36516  |                                                                                 |
| 1 | 18469220 | 18469664 | KD2-H4K8ac_peak_480 | 4.06758  |                                                                                 |
| 1 | 18576110 | 18576472 | KD2-H4K8ac_peak_481 | 6.16888  |                                                                                 |
| 1 | 19122197 | 19122397 | KD2-H4K8ac_peak_482 | 4.42765  |                                                                                 |
| 1 | 19228796 | 19229211 | KD2-H4K8ac_peak_483 | 6.65673  | ALDH4A1_ENSG00000159423                                                         |
| 1 | 19229513 | 19229723 | KD2-H4K8ac_peak_484 | 7.74292  | ALDH4A1_ENSG00000159423                                                         |
| 1 | 19283452 | 19283786 | KD2-H4K8ac_peak_485 | 5.14125  | IFFO2_ENSG00000169991                                                           |
| 1 | 19536333 | 19536719 | KD2-H4K8ac_peak_486 | 9.11891  | UBR4_ENSG00000127481;RP1-43E13.2_ENSG00000230424                                |
| 1 | 19577821 | 19578805 | KD2-H4K8ac_peak_487 | 25.8903  | EMC1_ENSG00000127463;MRTO4_ENSG00000053372                                      |
| 1 | 19638189 | 19638536 | KD2-H4K8ac_peak_488 | 7.07117  | AKR7A2_ENSG00000053371;PQLC2_ENSG00000040487                                    |
| 1 | 19664946 | 19665327 | KD2-H4K8ac_peak_489 | 9.73431  |                                                                                 |
| 1 | 19666260 | 19666557 | KD2-H4K8ac_peak_490 | 6.7498   |                                                                                 |
| 1 | 19696100 | 19696372 | KD2-H4K8ac_peak_491 | 10.01478 |                                                                                 |
| 1 | 19698162 | 19698558 | KD2-H4K8ac_peak_492 | 8.52881  |                                                                                 |
| 1 | 19716861 | 19717239 | KD2-H4K8ac_peak_493 | 4.44527  |                                                                                 |
| 1 | 19718231 | 19718467 | KD2-H4K8ac_peak_494 | 7.37678  |                                                                                 |
| 1 | 19722355 | 19722736 | KD2-H4K8ac_peak_495 | 6.25869  |                                                                                 |
| 1 | 19772407 | 19772618 | KD2-H4K8ac_peak_496 | 5.88845  |                                                                                 |
| 1 | 19774060 | 19774771 | KD2-H4K8ac_peak_497 | 6.65673  |                                                                                 |
| 1 | 19776013 | 19776503 | KD2-H4K8ac_peak_498 | 5.14125  |                                                                                 |
| 1 | 19779823 | 19780067 | KD2-H4K8ac_peak_499 | 5.45396  |                                                                                 |
| 1 | 19781488 | 19781682 | KD2-H4K8ac_peak_500 | 4.91674  |                                                                                 |
| 1 | 19811472 | 19811981 | KD2-H4K8ac_peak_501 | 10.29842 | CAPZB_ENSG00000077549                                                           |
| 1 | 19812262 | 19813031 | KD2-H4K8ac_peak_502 | 7.96322  | CAPZB_ENSG00000077549                                                           |
| 1 | 19922771 | 19923130 | KD2-H4K8ac_peak_503 | 6.40683  | RP5-1056L3.1_ENSG00000235185;MINOS1-NBL1_ENSG00000270136;MINOS1_ENSG00000173436 |
| 1 | 19923522 | 19923979 | KD2-H4K8ac_peak_504 | 13.13965 | RP5-1056L3.1_ENSG00000235185;MINOS1-NBL1_ENSG00000270136;MINOS1_ENSG00000173436 |

|   |          |          |                     |          |                                                   |
|---|----------|----------|---------------------|----------|---------------------------------------------------|
| 1 | 19970326 | 19970651 | KD2-H4K8ac_peak_505 | 11.66477 |                                                   |
| 1 | 19970898 | 19972301 | KD2-H4K8ac_peak_506 | 9.63487  |                                                   |
| 1 | 19991096 | 19991781 | KD2-H4K8ac_peak_507 | 11.22681 | HTR6_ENSG00000158748                              |
| 1 | 20125824 | 20126730 | KD2-H4K8ac_peak_508 | 11.50346 | TMCO4_ENSG00000162542                             |
| 1 | 20208280 | 20208626 | KD2-H4K8ac_peak_509 | 13.73635 | OTUD3_ENSG00000169914                             |
| 1 | 20208953 | 20209415 | KD2-H4K8ac_peak_510 | 10.43145 | OTUD3_ENSG00000169914                             |
| 1 | 20478281 | 20478651 | KD2-H4K8ac_peak_511 | 3.87368  |                                                   |
| 1 | 20539674 | 20539948 | KD2-H4K8ac_peak_512 | 5.88845  |                                                   |
| 1 | 20634882 | 20635233 | KD2-H4K8ac_peak_513 | 9.16531  |                                                   |
| 1 | 20767200 | 20767726 | KD2-H4K8ac_peak_514 | 15.06766 |                                                   |
| 1 | 20799461 | 20799797 | KD2-H4K8ac_peak_515 | 10.25088 |                                                   |
| 1 | 20801199 | 20801450 | KD2-H4K8ac_peak_516 | 7.13615  |                                                   |
| 1 | 20802445 | 20803387 | KD2-H4K8ac_peak_517 | 10.05606 |                                                   |
| 1 | 20803602 | 20804493 | KD2-H4K8ac_peak_518 | 17.19888 |                                                   |
| 1 | 20810581 | 20810831 | KD2-H4K8ac_peak_519 | 6.35843  |                                                   |
| 1 | 20812804 | 20813248 | KD2-H4K8ac_peak_520 | 11.18097 | CAMK2N1_ENSG00000162545                           |
| 1 | 20820594 | 20820817 | KD2-H4K8ac_peak_521 | 5.9696   |                                                   |
| 1 | 20834243 | 20835238 | KD2-H4K8ac_peak_522 | 8.55271  | MUL1_ENSG00000090432                              |
| 1 | 20940506 | 20940720 | KD2-H4K8ac_peak_523 | 6.66692  |                                                   |
| 1 | 20987499 | 20987826 | KD2-H4K8ac_peak_524 | 7.28628  | DDOST_ENSG00000244038                             |
| 1 | 20988303 | 20988913 | KD2-H4K8ac_peak_525 | 9.65086  | DDOST_ENSG00000244038                             |
| 1 | 21023256 | 21023741 | KD2-H4K8ac_peak_526 | 4.52039  |                                                   |
| 1 | 21043837 | 21044722 | KD2-H4K8ac_peak_527 | 10.87093 | KIF17_ENSG00000117245                             |
| 1 | 21112902 | 21113122 | KD2-H4K8ac_peak_528 | 4.42765  | HP1BP3_ENSG00000127483                            |
| 1 | 21113391 | 21114330 | KD2-H4K8ac_peak_529 | 13.73635 | HP1BP3_ENSG00000127483                            |
| 1 | 21350510 | 21350993 | KD2-H4K8ac_peak_530 | 8.00457  |                                                   |
| 1 | 21502275 | 21502545 | KD2-H4K8ac_peak_531 | 10.1591  | EIF4G3_ENSG00000075151;AL031005.1_ENSG00000266867 |
| 1 | 21503608 | 21504175 | KD2-H4K8ac_peak_532 | 21.60954 | EIF4G3_ENSG00000075151;AL031005.1_ENSG00000266867 |
| 1 | 21546630 | 21547441 | KD2-H4K8ac_peak_533 | 4.37809  |                                                   |
| 1 | 21581485 | 21581752 | KD2-H4K8ac_peak_534 | 8.85813  |                                                   |
| 1 | 21588568 | 21588820 | KD2-H4K8ac_peak_535 | 5.14125  |                                                   |
| 1 | 21605777 | 21606109 | KD2-H4K8ac_peak_536 | 4.211    |                                                   |
| 1 | 21606557 | 21607365 | KD2-H4K8ac_peak_537 | 10.16972 |                                                   |
| 1 | 21607568 | 21607788 | KD2-H4K8ac_peak_538 | 4.75875  |                                                   |
| 1 | 21609815 | 21610145 | KD2-H4K8ac_peak_539 | 13.09607 |                                                   |
| 1 | 21610392 | 21610807 | KD2-H4K8ac_peak_540 | 16.64426 |                                                   |
| 1 | 21611029 | 21611423 | KD2-H4K8ac_peak_541 | 10.53377 |                                                   |
| 1 | 21615735 | 21616304 | KD2-H4K8ac_peak_542 | 10.33736 |                                                   |
| 1 | 21616638 | 21617172 | KD2-H4K8ac_peak_543 | 12.40345 |                                                   |
| 1 | 21628618 | 21628849 | KD2-H4K8ac_peak_544 | 6.16747  |                                                   |
| 1 | 21629259 | 21629845 | KD2-H4K8ac_peak_545 | 5.87879  |                                                   |
| 1 | 21632251 | 21632472 | KD2-H4K8ac_peak_546 | 3.97079  |                                                   |
| 1 | 21633318 | 21633593 | KD2-H4K8ac_peak_547 | 4.82973  |                                                   |
| 1 | 21633791 | 21634139 | KD2-H4K8ac_peak_548 | 4.68059  |                                                   |
| 1 | 21634583 | 21635324 | KD2-H4K8ac_peak_549 | 11.58876 |                                                   |
| 1 | 21636422 | 21637271 | KD2-H4K8ac_peak_550 | 12.2507  |                                                   |



|   |          |          |                     |          |                                                       |
|---|----------|----------|---------------------|----------|-------------------------------------------------------|
| 1 | 21640732 | 21641210 | KD2-H4K8ac_peak_551 | 5.82859  |                                                       |
| 1 | 21646018 | 21646341 | KD2-H4K8ac_peak_552 | 10.0692  |                                                       |
| 1 | 21648002 | 21648256 | KD2-H4K8ac_peak_553 | 7.13615  |                                                       |
| 1 | 21651233 | 21651433 | KD2-H4K8ac_peak_554 | 4.42765  |                                                       |
| 1 | 21653407 | 21653613 | KD2-H4K8ac_peak_555 | 4.56666  |                                                       |
| 1 | 21687726 | 21688000 | KD2-H4K8ac_peak_556 | 7.44366  |                                                       |
| 1 | 21762973 | 21763655 | KD2-H4K8ac_peak_557 | 14.66631 |                                                       |
| 1 | 21763850 | 21764242 | KD2-H4K8ac_peak_558 | 6.30229  |                                                       |
| 1 | 21767088 | 21767296 | KD2-H4K8ac_peak_559 | 3.75035  | NBPF3_ENSG00000142794                                 |
| 1 | 21835276 | 21835641 | KD2-H4K8ac_peak_560 | 5.88845  | ALPL_ENSG00000162551                                  |
| 1 | 21835871 | 21836195 | KD2-H4K8ac_peak_561 | 11.43863 | ALPL_ENSG00000162551                                  |
| 1 | 21901183 | 21901448 | KD2-H4K8ac_peak_562 | 4.44748  |                                                       |
| 1 | 21948523 | 21949020 | KD2-H4K8ac_peak_563 | 6.25869  |                                                       |
| 1 | 21949527 | 21949747 | KD2-H4K8ac_peak_564 | 8.04448  |                                                       |
| 1 | 21950556 | 21951421 | KD2-H4K8ac_peak_565 | 7.49599  |                                                       |
| 1 | 21952565 | 21952993 | KD2-H4K8ac_peak_566 | 6.05809  |                                                       |
| 1 | 21953459 | 21953758 | KD2-H4K8ac_peak_567 | 9.43437  |                                                       |
| 1 | 21958480 | 21958706 | KD2-H4K8ac_peak_568 | 5.14125  |                                                       |
| 1 | 21977692 | 21978109 | KD2-H4K8ac_peak_569 | 6.25869  |                                                       |
| 1 | 21995336 | 21995815 | KD2-H4K8ac_peak_570 | 8.4716   | RAP1GAP_ENSG00000076864                               |
| 1 | 22109183 | 22109564 | KD2-H4K8ac_peak_571 | 11.05467 | USP48_ENSG00000090686                                 |
| 1 | 22109819 | 22110041 | KD2-H4K8ac_peak_572 | 9.36516  | USP48_ENSG00000090686                                 |
| 1 | 22110404 | 22110792 | KD2-H4K8ac_peak_573 | 4.42765  | USP48_ENSG00000090686                                 |
| 1 | 22140900 | 22141481 | KD2-H4K8ac_peak_574 | 9.20193  |                                                       |
| 1 | 22263307 | 22263506 | KD2-H4K8ac_peak_575 | 5.57044  | HSPG2_ENSG00000142798                                 |
| 1 | 22264014 | 22264335 | KD2-H4K8ac_peak_576 | 10.96455 | HSPG2_ENSG00000142798                                 |
| 1 | 22350634 | 22351401 | KD2-H4K8ac_peak_577 | 15.22643 | RP1-224A6.3_ENSG00000228397;LINC00339_ENSG00000218510 |
| 1 | 22352033 | 22352599 | KD2-H4K8ac_peak_578 | 7.76329  | RP1-224A6.3_ENSG00000228397;LINC00339_ENSG00000218510 |
| 1 | 22378471 | 22378947 | KD2-H4K8ac_peak_579 | 9.6247   | CDC42_ENSG00000070831                                 |
| 1 | 22379282 | 22379694 | KD2-H4K8ac_peak_580 | 9.20193  | CDC42_ENSG00000070831                                 |
| 1 | 22641915 | 22642229 | KD2-H4K8ac_peak_581 | 6.65673  |                                                       |
| 1 | 22644379 | 22644649 | KD2-H4K8ac_peak_582 | 6.92624  |                                                       |
| 1 | 22644865 | 22645061 | KD2-H4K8ac_peak_583 | 11.05467 |                                                       |
| 1 | 22645411 | 22645648 | KD2-H4K8ac_peak_584 | 8.4716   |                                                       |
| 1 | 22653031 | 22653250 | KD2-H4K8ac_peak_585 | 8.55271  |                                                       |
| 1 | 22654965 | 22655780 | KD2-H4K8ac_peak_586 | 11.51672 |                                                       |
| 1 | 22668674 | 22669740 | KD2-H4K8ac_peak_587 | 8.79106  |                                                       |
| 1 | 22676613 | 22677377 | KD2-H4K8ac_peak_588 | 12.00273 |                                                       |
| 1 | 22677650 | 22678447 | KD2-H4K8ac_peak_589 | 10.34425 |                                                       |
| 1 | 22689459 | 22689857 | KD2-H4K8ac_peak_590 | 10.77651 |                                                       |
| 1 | 22691866 | 22692242 | KD2-H4K8ac_peak_591 | 10.06887 |                                                       |
| 1 | 22755589 | 22755811 | KD2-H4K8ac_peak_592 | 5.835    |                                                       |
| 1 | 22773999 | 22774356 | KD2-H4K8ac_peak_593 | 4.42765  |                                                       |
| 1 | 22777516 | 22778256 | KD2-H4K8ac_peak_594 | 14.56955 | ZBTB40_ENSG00000184677                                |
| 1 | 22798234 | 22798443 | KD2-H4K8ac_peak_595 | 6.56211  |                                                       |
| 1 | 22897224 | 22897449 | KD2-H4K8ac_peak_596 | 4.42765  |                                                       |

|   |          |          |                     |          |                                                                       |
|---|----------|----------|---------------------|----------|-----------------------------------------------------------------------|
| 1 | 22908526 | 22908758 | KD2-H4K8ac_peak_597 | 9.65086  |                                                                       |
| 1 | 22909990 | 22910415 | KD2-H4K8ac_peak_598 | 4.06758  |                                                                       |
| 1 | 22910649 | 22910864 | KD2-H4K8ac_peak_599 | 8.30114  |                                                                       |
| 1 | 23036230 | 23036743 | KD2-H4K8ac_peak_600 | 7.27716  | EPHB2_ENSG00000133216                                                 |
| 1 | 23036995 | 23037261 | KD2-H4K8ac_peak_601 | 21.00776 | EPHB2_ENSG00000133216                                                 |
| 1 | 23116378 | 23116792 | KD2-H4K8ac_peak_602 | 4.8888   |                                                                       |
| 1 | 23120734 | 23120946 | KD2-H4K8ac_peak_603 | 4.86324  |                                                                       |
| 1 | 23141901 | 23142367 | KD2-H4K8ac_peak_604 | 7.95934  |                                                                       |
| 1 | 23143022 | 23143246 | KD2-H4K8ac_peak_605 | 7.47462  |                                                                       |
| 1 | 23153582 | 23153975 | KD2-H4K8ac_peak_606 | 15.13633 |                                                                       |
| 1 | 23346054 | 23346525 | KD2-H4K8ac_peak_607 | 8.4716   | KDM1A_ENSG00000004487                                                 |
| 1 | 23543488 | 23543885 | KD2-H4K8ac_peak_608 | 5.45396  |                                                                       |
| 1 | 23670183 | 23670766 | KD2-H4K8ac_peak_609 | 12.88108 | HNRNPR_ENSG00000125944                                                |
| 1 | 23671222 | 23671683 | KD2-H4K8ac_peak_610 | 11.22681 | HNRNPR_ENSG00000125944                                                |
| 1 | 23695099 | 23695752 | KD2-H4K8ac_peak_611 | 12.99417 | ZNF436_ENSG00000125945;C1orf213_ENSG00000249087;Y_RNA_ENSG00000201405 |
| 1 | 23810205 | 23810624 | KD2-H4K8ac_peak_612 | 8.17902  | ASAP3_ENSG00000088280                                                 |
| 1 | 23823806 | 23824313 | KD2-H4K8ac_peak_613 | 10.05606 |                                                                       |
| 1 | 23856956 | 23857723 | KD2-H4K8ac_peak_614 | 11.92978 | E2F2_ENSG00000007968                                                  |
| 1 | 23858008 | 23858227 | KD2-H4K8ac_peak_615 | 9.95119  | E2F2_ENSG00000007968                                                  |
| 1 | 23858788 | 23859444 | KD2-H4K8ac_peak_616 | 7.45501  |                                                                       |
| 1 | 23880335 | 23881342 | KD2-H4K8ac_peak_617 | 26.77453 |                                                                       |
| 1 | 23881632 | 23882087 | KD2-H4K8ac_peak_618 | 4.06758  |                                                                       |
| 1 | 23884657 | 23885063 | KD2-H4K8ac_peak_619 | 8.52559  |                                                                       |
| 1 | 23894243 | 23894575 | KD2-H4K8ac_peak_620 | 8.10216  |                                                                       |
| 1 | 23894797 | 23895903 | KD2-H4K8ac_peak_621 | 9.95759  |                                                                       |
| 1 | 23899444 | 23899669 | KD2-H4K8ac_peak_622 | 5.88845  |                                                                       |
| 1 | 23907787 | 23908097 | KD2-H4K8ac_peak_623 | 6.8836   | MDS2_ENSG00000197880                                                  |
| 1 | 23924749 | 23925106 | KD2-H4K8ac_peak_624 | 7.07117  |                                                                       |
| 1 | 23946053 | 23946409 | KD2-H4K8ac_peak_625 | 7.07117  |                                                                       |
| 1 | 23961001 | 23961556 | KD2-H4K8ac_peak_626 | 19.94588 |                                                                       |
| 1 | 24018348 | 24018661 | KD2-H4K8ac_peak_627 | 13.92465 | RPL11_ENSG00000142676                                                 |
| 1 | 24069230 | 24070509 | KD2-H4K8ac_peak_628 | 14.48084 | TCEB3_ENSG00000011007                                                 |
| 1 | 24104941 | 24105326 | KD2-H4K8ac_peak_629 | 11.43353 | RP5-886K2.3_ENSG00000236810;PITHD1_ENSG00000057757                    |
| 1 | 24151472 | 24151907 | KD2-H4K8ac_peak_630 | 22.05243 |                                                                       |
| 1 | 24164577 | 24164784 | KD2-H4K8ac_peak_631 | 5.25071  | HMGCL_ENSG00000117305                                                 |
| 1 | 24194964 | 24195367 | KD2-H4K8ac_peak_632 | 7.13615  | FUCA1_ENSG00000179163                                                 |
| 1 | 24231833 | 24232186 | KD2-H4K8ac_peak_633 | 4.42765  |                                                                       |
| 1 | 24437786 | 24437980 | KD2-H4K8ac_peak_634 | 8.10216  | MYOM3_ENSG00000142661                                                 |
| 1 | 24513448 | 24513829 | KD2-H4K8ac_peak_635 | 20.59319 | IFNLR1_ENSG00000185436                                                |
| 1 | 24514032 | 24514295 | KD2-H4K8ac_peak_636 | 13.09607 | IFNLR1_ENSG00000185436                                                |
| 1 | 24522343 | 24522584 | KD2-H4K8ac_peak_637 | 4.37709  |                                                                       |
| 1 | 24667898 | 24668170 | KD2-H4K8ac_peak_638 | 5.23853  |                                                                       |
| 1 | 24740407 | 24740932 | KD2-H4K8ac_peak_639 | 13.09607 |                                                                       |
| 1 | 24741695 | 24742032 | KD2-H4K8ac_peak_640 | 6.66692  | NIPAL3_ENSG00000001461                                                |
| 1 | 24828915 | 24829243 | KD2-H4K8ac_peak_641 | 6.65673  | RCAN3_ENSG00000117602                                                 |
| 1 | 24878492 | 24878713 | KD2-H4K8ac_peak_642 | 8.00457  |                                                                       |

|   |          |          |                     |          |                                                                                |
|---|----------|----------|---------------------|----------|--------------------------------------------------------------------------------|
| 1 | 24886056 | 24886277 | KD2-H4K8ac_peak_643 | 7.76329  |                                                                                |
| 1 | 24969101 | 24969327 | KD2-H4K8ac_peak_644 | 10.53377 |                                                                                |
| 1 | 25020059 | 25020733 | KD2-H4K8ac_peak_645 | 4.86324  |                                                                                |
| 1 | 25057047 | 25057298 | KD2-H4K8ac_peak_646 | 11.89502 |                                                                                |
| 1 | 25061886 | 25062143 | KD2-H4K8ac_peak_647 | 6.72334  |                                                                                |
| 1 | 25062763 | 25063226 | KD2-H4K8ac_peak_648 | 5.88845  |                                                                                |
| 1 | 25197472 | 25197710 | KD2-H4K8ac_peak_649 | 5.71749  |                                                                                |
| 1 | 25240051 | 25241442 | KD2-H4K8ac_peak_650 | 9.6247   |                                                                                |
| 1 | 25381659 | 25381910 | KD2-H4K8ac_peak_651 | 4.42765  |                                                                                |
| 1 | 25391494 | 25392495 | KD2-H4K8ac_peak_652 | 5.9696   |                                                                                |
| 1 | 25558610 | 25559408 | KD2-H4K8ac_peak_653 | 11.43353 | SYF2_ENSG00000117614                                                           |
| 1 | 25565490 | 25565872 | KD2-H4K8ac_peak_654 | 6.98292  |                                                                                |
| 1 | 25573621 | 25573885 | KD2-H4K8ac_peak_655 | 15.57998 | RP3-465N24.6_ENSG00000272432                                                   |
| 1 | 25574146 | 25574545 | KD2-H4K8ac_peak_656 | 11.3394  | RP3-465N24.6_ENSG00000272432                                                   |
| 1 | 25664854 | 25665310 | KD2-H4K8ac_peak_657 | 17.43705 | C1orf63_ENSG00000117616;RP11-335G20.7_ENSG00000259984;TMEM50A_ENSG00000183726  |
| 1 | 25756384 | 25756677 | KD2-H4K8ac_peak_658 | 8.30974  | RHCE_ENSG00000188672;TMEM57_ENSG00000204178                                    |
| 1 | 25757509 | 25757781 | KD2-H4K8ac_peak_659 | 6.84261  | RHCE_ENSG00000188672;TMEM57_ENSG00000204178                                    |
| 1 | 25928550 | 25928762 | KD2-H4K8ac_peak_660 | 6.30229  |                                                                                |
| 1 | 25942499 | 25942960 | KD2-H4K8ac_peak_661 | 16.12525 | MAN1C1_ENSG00000117643                                                         |
| 1 | 25985653 | 25985847 | KD2-H4K8ac_peak_662 | 4.42765  | RP1-187B23.1_ENSG00000233478                                                   |
| 1 | 26017122 | 26017314 | KD2-H4K8ac_peak_663 | 6.40683  |                                                                                |
| 1 | 26053777 | 26054285 | KD2-H4K8ac_peak_664 | 7.98152  |                                                                                |
| 1 | 26091739 | 26092210 | KD2-H4K8ac_peak_665 | 3.72574  |                                                                                |
| 1 | 26097473 | 26097671 | KD2-H4K8ac_peak_666 | 8.79106  |                                                                                |
| 1 | 26098356 | 26098631 | KD2-H4K8ac_peak_667 | 8.65175  |                                                                                |
| 1 | 26125870 | 26126063 | KD2-H4K8ac_peak_668 | 6.80488  | SEPN1_ENSG00000162430                                                          |
| 1 | 26126257 | 26126515 | KD2-H4K8ac_peak_669 | 8.86099  | SEPN1_ENSG00000162430                                                          |
| 1 | 26145254 | 26145797 | KD2-H4K8ac_peak_670 | 7.94441  | RP1-317E23.3_ENSG00000228172;MTFR1L_ENSG00000117640                            |
| 1 | 26146035 | 26146983 | KD2-H4K8ac_peak_671 | 9.20193  | RP1-317E23.3_ENSG00000228172;MTFR1L_ENSG00000117640;AL020996.1_ENSG00000223474 |
| 1 | 26185700 | 26185900 | KD2-H4K8ac_peak_672 | 5.54647  | AUNIP_ENSG00000127423;RP1-125I3.2_ENSG00000236528                              |
| 1 | 26201221 | 26202863 | KD2-H4K8ac_peak_673 | 12.66412 |                                                                                |
| 1 | 26232391 | 26232793 | KD2-H4K8ac_peak_674 | 6.99815  | STMN1_ENSG00000117632;MIR3917_ENSG00000264021                                  |
| 1 | 26233063 | 26233935 | KD2-H4K8ac_peak_675 | 20.53952 | STMN1_ENSG00000117632;MIR3917_ENSG00000264021                                  |
| 1 | 26254669 | 26254862 | KD2-H4K8ac_peak_676 | 4.86324  |                                                                                |
| 1 | 26323939 | 26324466 | KD2-H4K8ac_peak_677 | 14.98671 | PAFAH2_ENSG00000158006                                                         |
| 1 | 26324927 | 26325624 | KD2-H4K8ac_peak_678 | 7.69294  | PAFAH2_ENSG00000158006                                                         |
| 1 | 26348367 | 26348634 | KD2-H4K8ac_peak_679 | 6.60096  |                                                                                |
| 1 | 26361610 | 26361825 | KD2-H4K8ac_peak_680 | 6.80488  |                                                                                |
| 1 | 26437193 | 26438112 | KD2-H4K8ac_peak_681 | 17.8868  | PDIK1L_ENSG00000175087                                                         |
| 1 | 26482762 | 26483384 | KD2-H4K8ac_peak_682 | 12.74171 |                                                                                |
| 1 | 26487768 | 26488316 | KD2-H4K8ac_peak_683 | 5.9696   |                                                                                |
| 1 | 26490667 | 26491483 | KD2-H4K8ac_peak_684 | 10.43145 |                                                                                |
| 1 | 26495662 | 26496245 | KD2-H4K8ac_peak_685 | 7.36799  | ZNF593_ENSG00000142684                                                         |
| 1 | 26496493 | 26496807 | KD2-H4K8ac_peak_686 | 10.19949 | ZNF593_ENSG00000142684                                                         |
| 1 | 26559708 | 26560302 | KD2-H4K8ac_peak_687 | 7.74292  | CEP85_ENSG00000130695                                                          |
| 1 | 26617632 | 26617845 | KD2-H4K8ac_peak_688 | 8.26945  |                                                                                |

|   |          |          |                     |          |                                                    |
|---|----------|----------|---------------------|----------|----------------------------------------------------|
| 1 | 26632897 | 26633141 | KD2-H4K8ac_peak_689 | 7.70289  |                                                    |
| 1 | 26633380 | 26633720 | KD2-H4K8ac_peak_690 | 8.45238  |                                                    |
| 1 | 26647914 | 26648148 | KD2-H4K8ac_peak_691 | 4.86324  |                                                    |
| 1 | 26662978 | 26663330 | KD2-H4K8ac_peak_692 | 6.25869  |                                                    |
| 1 | 26686519 | 26686738 | KD2-H4K8ac_peak_693 | 5.14125  |                                                    |
| 1 | 26735875 | 26736296 | KD2-H4K8ac_peak_694 | 6.16888  | LIN28A_ENSG00000131914                             |
| 1 | 26758359 | 26758568 | KD2-H4K8ac_peak_695 | 9.34989  | DHDDS_ENSG00000117682                              |
| 1 | 26798337 | 26798681 | KD2-H4K8ac_peak_696 | 5.75757  | HMG2_ENSG00000198830                               |
| 1 | 26799022 | 26799491 | KD2-H4K8ac_peak_697 | 16.57619 | HMG2_ENSG00000198830                               |
| 1 | 26826401 | 26827315 | KD2-H4K8ac_peak_698 | 8.4716   |                                                    |
| 1 | 26827570 | 26828040 | KD2-H4K8ac_peak_699 | 11.89502 |                                                    |
| 1 | 26855698 | 26856088 | KD2-H4K8ac_peak_700 | 16.32216 | RPS6KA1_ENSG00000117676                            |
| 1 | 26947140 | 26947396 | KD2-H4K8ac_peak_701 | 13.31016 |                                                    |
| 1 | 26947619 | 26948322 | KD2-H4K8ac_peak_702 | 7.47462  |                                                    |
| 1 | 27022180 | 27022394 | KD2-H4K8ac_peak_703 | 15.20126 | ARID1A_ENSG00000117713                             |
| 1 | 27022813 | 27024113 | KD2-H4K8ac_peak_704 | 16.67374 | ARID1A_ENSG00000117713                             |
| 1 | 27113105 | 27113428 | KD2-H4K8ac_peak_705 | 9.96941  | PIGV_ENSG00000060642                               |
| 1 | 27113836 | 27114214 | KD2-H4K8ac_peak_706 | 8.4716   | PIGV_ENSG00000060642                               |
| 1 | 27114451 | 27115069 | KD2-H4K8ac_peak_707 | 6.66359  | PIGV_ENSG00000060642                               |
| 1 | 27136753 | 27136982 | KD2-H4K8ac_peak_708 | 10.0746  |                                                    |
| 1 | 27152077 | 27153042 | KD2-H4K8ac_peak_709 | 8.4716   | ZDHHC18_ENSG00000204160                            |
| 1 | 27153369 | 27153609 | KD2-H4K8ac_peak_710 | 5.61377  | ZDHHC18_ENSG00000204160                            |
| 1 | 27191044 | 27191475 | KD2-H4K8ac_peak_711 | 3.97079  |                                                    |
| 1 | 27191904 | 27192144 | KD2-H4K8ac_peak_712 | 7.0754   |                                                    |
| 1 | 27192423 | 27192798 | KD2-H4K8ac_peak_713 | 9.402    |                                                    |
| 1 | 27216379 | 27216748 | KD2-H4K8ac_peak_714 | 16.61426 | GPN2_ENSG00000142751                               |
| 1 | 27216973 | 27217414 | KD2-H4K8ac_peak_715 | 4.91674  | GPN2_ENSG00000142751                               |
| 1 | 27226372 | 27227624 | KD2-H4K8ac_peak_716 | 13.34404 | GPATCH3_ENSG00000198746;NUDC_ENSG00000090273       |
| 1 | 27240421 | 27240917 | KD2-H4K8ac_peak_717 | 6.05809  | NR0B2_ENSG00000131910                              |
| 1 | 27338965 | 27339216 | KD2-H4K8ac_peak_718 | 5.75757  | FAM46B_ENSG00000158246                             |
| 1 | 27339828 | 27340057 | KD2-H4K8ac_peak_719 | 7.33266  | FAM46B_ENSG00000158246                             |
| 1 | 27397274 | 27397733 | KD2-H4K8ac_peak_720 | 6.94255  |                                                    |
| 1 | 27425612 | 27425850 | KD2-H4K8ac_peak_721 | 12.16946 |                                                    |
| 1 | 27426157 | 27426924 | KD2-H4K8ac_peak_722 | 10.27185 |                                                    |
| 1 | 27481206 | 27481576 | KD2-H4K8ac_peak_723 | 14.8083  |                                                    |
| 1 | 27560376 | 27560786 | KD2-H4K8ac_peak_724 | 7.36799  | RP11-40H20.4_ENSG00000224311;WDTC1_ENSG00000142784 |
| 1 | 27561122 | 27561574 | KD2-H4K8ac_peak_725 | 16.73922 | RP11-40H20.4_ENSG00000224311;WDTC1_ENSG00000142784 |
| 1 | 27624928 | 27625135 | KD2-H4K8ac_peak_726 | 7.47462  |                                                    |
| 1 | 27625412 | 27626246 | KD2-H4K8ac_peak_727 | 9.58924  |                                                    |
| 1 | 27626593 | 27627872 | KD2-H4K8ac_peak_728 | 16.25886 |                                                    |
| 1 | 27644517 | 27645050 | KD2-H4K8ac_peak_729 | 10.0692  |                                                    |
| 1 | 27648798 | 27649400 | KD2-H4K8ac_peak_730 | 10.66719 | TMEM222_ENSG00000186501                            |
| 1 | 27675717 | 27676924 | KD2-H4K8ac_peak_731 | 25.35008 |                                                    |
| 1 | 27683788 | 27684122 | KD2-H4K8ac_peak_732 | 6.05809  |                                                    |
| 1 | 27692519 | 27693439 | KD2-H4K8ac_peak_733 | 11.05467 | MAP3K6_ENSG00000142733                             |
| 1 | 27718495 | 27718823 | KD2-H4K8ac_peak_734 | 6.25869  | GPR3_ENSG00000181773                               |

|   |          |          |                     |          |                                                        |
|---|----------|----------|---------------------|----------|--------------------------------------------------------|
| 1 | 27719165 | 27719474 | KD2-H4K8ac_peak_735 | 9.63487  | GPR3_ENSG00000181773                                   |
| 1 | 27725005 | 27725201 | KD2-H4K8ac_peak_736 | 6.05809  |                                                        |
| 1 | 27816102 | 27816637 | KD2-H4K8ac_peak_737 | 13.73635 | WASF2_ENSG00000158195                                  |
| 1 | 27816979 | 27817508 | KD2-H4K8ac_peak_738 | 11.70505 | WASF2_ENSG00000158195                                  |
| 1 | 27830555 | 27830838 | KD2-H4K8ac_peak_739 | 8.02571  |                                                        |
| 1 | 27831162 | 27831591 | KD2-H4K8ac_peak_740 | 17.25154 |                                                        |
| 1 | 27845675 | 27846147 | KD2-H4K8ac_peak_741 | 6.48713  |                                                        |
| 1 | 27849207 | 27849983 | KD2-H4K8ac_peak_742 | 9.08816  |                                                        |
| 1 | 27853861 | 27854953 | KD2-H4K8ac_peak_743 | 8.85813  |                                                        |
| 1 | 27862409 | 27862662 | KD2-H4K8ac_peak_744 | 10.08707 |                                                        |
| 1 | 27887573 | 27888012 | KD2-H4K8ac_peak_745 | 7.36799  |                                                        |
| 1 | 27888332 | 27888710 | KD2-H4K8ac_peak_746 | 9.57101  |                                                        |
| 1 | 27986088 | 27986424 | KD2-H4K8ac_peak_747 | 6.97919  |                                                        |
| 1 | 27988883 | 27989679 | KD2-H4K8ac_peak_748 | 8.82427  | RP11-288L9.1_ENSG00000233975                           |
| 1 | 27998803 | 27999173 | KD2-H4K8ac_peak_749 | 7.1181   | IF16_ENSG00000126709                                   |
| 1 | 28051420 | 28052011 | KD2-H4K8ac_peak_750 | 10.86378 | FAM76A_ENSG00000009780                                 |
| 1 | 28156683 | 28157123 | KD2-H4K8ac_peak_751 | 10.46874 | PPP1R8_ENSG00000117751                                 |
| 1 | 28157407 | 28157960 | KD2-H4K8ac_peak_752 | 7.07117  | PPP1R8_ENSG00000117751                                 |
| 1 | 28198531 | 28198740 | KD2-H4K8ac_peak_753 | 6.48242  | THEMIS2_ENSG00000130775                                |
| 1 | 28240720 | 28241037 | KD2-H4K8ac_peak_754 | 10.19949 | RPA2_ENSG00000117748                                   |
| 1 | 28241732 | 28242022 | KD2-H4K8ac_peak_755 | 7.40111  | RPA2_ENSG00000117748                                   |
| 1 | 28414695 | 28415076 | KD2-H4K8ac_peak_756 | 7.67504  | EYA3_ENSG00000158161                                   |
| 1 | 28431611 | 28431847 | KD2-H4K8ac_peak_757 | 7.9076   |                                                        |
| 1 | 28500353 | 28500869 | KD2-H4K8ac_peak_758 | 15.09202 |                                                        |
| 1 | 28559231 | 28559473 | KD2-H4K8ac_peak_759 | 12.30509 | DNAJC8_ENSG00000126698                                 |
| 1 | 28562091 | 28562392 | KD2-H4K8ac_peak_760 | 6.66692  | ATPIF1_ENSG00000130770                                 |
| 1 | 28575573 | 28575888 | KD2-H4K8ac_peak_761 | 10.25088 |                                                        |
| 1 | 28654635 | 28655350 | KD2-H4K8ac_peak_762 | 10.05606 | MED18_ENSG00000130772                                  |
| 1 | 28695040 | 28695351 | KD2-H4K8ac_peak_763 | 4.06758  | PHACTR4_ENSG00000204138                                |
| 1 | 28695633 | 28696071 | KD2-H4K8ac_peak_764 | 5.54647  | PHACTR4_ENSG00000204138                                |
| 1 | 28696333 | 28696818 | KD2-H4K8ac_peak_765 | 14.83804 | PHACTR4_ENSG00000204138                                |
| 1 | 28831918 | 28832218 | KD2-H4K8ac_peak_766 | 6.65673  | RCC1_ENSG00000180198;SNHG3_ENSG00000242125             |
| 1 | 28833027 | 28833249 | KD2-H4K8ac_peak_767 | 4.77079  | RCC1_ENSG00000180198;SNHG3_ENSG00000242125             |
| 1 | 28834226 | 28834429 | KD2-H4K8ac_peak_768 | 6.83936  | SNORA73B_ENSG00000200087                               |
| 1 | 28879648 | 28880081 | KD2-H4K8ac_peak_769 | 14.98936 | TRNAU1AP_ENSG00000180098                               |
| 1 | 28908089 | 28908291 | KD2-H4K8ac_peak_770 | 9.63487  |                                                        |
| 1 | 28908547 | 28908867 | KD2-H4K8ac_peak_771 | 6.67092  | SNHG12_ENSG00000197989                                 |
| 1 | 28918832 | 28919129 | KD2-H4K8ac_peak_772 | 5.45396  | RAB42_ENSG00000188060                                  |
| 1 | 28919387 | 28919603 | KD2-H4K8ac_peak_773 | 6.99815  | RAB42_ENSG00000188060                                  |
| 1 | 28969801 | 28970648 | KD2-H4K8ac_peak_774 | 10.86378 | TAF12_ENSG00000120656;RP11-442N24__B.1_ENSG00000229388 |
| 1 | 28974004 | 28974380 | KD2-H4K8ac_peak_775 | 8.10216  | RNU11_ENSG00000270103                                  |
| 1 | 28975546 | 28976127 | KD2-H4K8ac_peak_776 | 8.17902  | RNU11_ENSG00000270103                                  |
| 1 | 28994011 | 28994996 | KD2-H4K8ac_peak_777 | 8.17902  | GMEB1_ENSG00000162419                                  |
| 1 | 28995597 | 28996261 | KD2-H4K8ac_peak_778 | 10.19949 | GMEB1_ENSG00000162419                                  |
| 1 | 29062772 | 29063211 | KD2-H4K8ac_peak_779 | 12.82393 | YTHDF2_ENSG00000198492                                 |
| 1 | 29063528 | 29064104 | KD2-H4K8ac_peak_780 | 21.11201 | YTHDF2_ENSG00000198492                                 |

|   |          |          |                     |          |                          |
|---|----------|----------|---------------------|----------|--------------------------|
| 1 | 29111926 | 29112139 | KD2-H4K8ac_peak_781 | 6.4095   |                          |
| 1 | 29138110 | 29138388 | KD2-H4K8ac_peak_782 | 6.30229  | OPRD1_ENSG00000116329    |
| 1 | 29138584 | 29139604 | KD2-H4K8ac_peak_783 | 12.57865 | OPRD1_ENSG00000116329    |
| 1 | 29142119 | 29142363 | KD2-H4K8ac_peak_784 | 6.65673  |                          |
| 1 | 29148861 | 29149078 | KD2-H4K8ac_peak_785 | 5.14125  |                          |
| 1 | 29149957 | 29150192 | KD2-H4K8ac_peak_786 | 6.0073   |                          |
| 1 | 29151375 | 29151589 | KD2-H4K8ac_peak_787 | 5.47943  |                          |
| 1 | 29157668 | 29158379 | KD2-H4K8ac_peak_788 | 10.08707 |                          |
| 1 | 29158818 | 29159281 | KD2-H4K8ac_peak_789 | 6.0073   |                          |
| 1 | 29161361 | 29161764 | KD2-H4K8ac_peak_790 | 11.92978 |                          |
| 1 | 29162191 | 29162465 | KD2-H4K8ac_peak_791 | 7.36799  |                          |
| 1 | 29163098 | 29163456 | KD2-H4K8ac_peak_792 | 4.64388  |                          |
| 1 | 29213727 | 29214419 | KD2-H4K8ac_peak_793 | 6.66692  | EPB41_ENSG00000159023    |
| 1 | 29240547 | 29240797 | KD2-H4K8ac_peak_794 | 6.66692  |                          |
| 1 | 29448165 | 29448443 | KD2-H4K8ac_peak_795 | 4.54006  |                          |
| 1 | 29450891 | 29451755 | KD2-H4K8ac_peak_796 | 6.66359  | TMEM200B_ENSG00000253304 |
| 1 | 29507726 | 29508391 | KD2-H4K8ac_peak_797 | 26.15943 | SRSF4_ENSG00000116350    |
| 1 | 29509090 | 29509309 | KD2-H4K8ac_peak_798 | 8.59579  | SRSF4_ENSG00000116350    |
| 1 | 29557170 | 29557375 | KD2-H4K8ac_peak_799 | 9.63487  | MECR_ENSG00000116353     |
| 1 | 29563156 | 29563393 | KD2-H4K8ac_peak_800 | 10.41994 | PTPRU_ENSG00000060656    |
| 1 | 29564785 | 29565107 | KD2-H4K8ac_peak_801 | 10.50587 |                          |
| 1 | 29709634 | 29710096 | KD2-H4K8ac_peak_802 | 6.51023  |                          |
| 1 | 29710385 | 29710580 | KD2-H4K8ac_peak_803 | 4.01115  |                          |
| 1 | 29710954 | 29711177 | KD2-H4K8ac_peak_804 | 6.40683  |                          |
| 1 | 29721031 | 29721623 | KD2-H4K8ac_peak_805 | 5.88845  |                          |
| 1 | 29754084 | 29754338 | KD2-H4K8ac_peak_806 | 9.32235  |                          |
| 1 | 29763485 | 29763737 | KD2-H4K8ac_peak_807 | 4.01115  |                          |
| 1 | 29768504 | 29769165 | KD2-H4K8ac_peak_808 | 6.94954  |                          |
| 1 | 29776217 | 29776563 | KD2-H4K8ac_peak_809 | 9.66321  |                          |
| 1 | 29785299 | 29785501 | KD2-H4K8ac_peak_810 | 6.20982  |                          |
| 1 | 29788625 | 29788902 | KD2-H4K8ac_peak_811 | 6.40683  |                          |
| 1 | 29794403 | 29794654 | KD2-H4K8ac_peak_812 | 9.19305  |                          |
| 1 | 29794931 | 29795402 | KD2-H4K8ac_peak_813 | 13.1258  |                          |
| 1 | 29795743 | 29796701 | KD2-H4K8ac_peak_814 | 18.41184 |                          |
| 1 | 29796933 | 29798345 | KD2-H4K8ac_peak_815 | 29.57597 |                          |
| 1 | 29798762 | 29799157 | KD2-H4K8ac_peak_816 | 8.79106  |                          |
| 1 | 29800027 | 29800797 | KD2-H4K8ac_peak_817 | 13.81781 |                          |
| 1 | 29801393 | 29802311 | KD2-H4K8ac_peak_818 | 11.50346 |                          |
| 1 | 29803945 | 29804302 | KD2-H4K8ac_peak_819 | 5.47943  |                          |
| 1 | 29804924 | 29805122 | KD2-H4K8ac_peak_820 | 4.42765  |                          |
| 1 | 29816921 | 29817288 | KD2-H4K8ac_peak_821 | 9.06703  |                          |
| 1 | 29841104 | 29841312 | KD2-H4K8ac_peak_822 | 7.79898  |                          |
| 1 | 30029726 | 30030151 | KD2-H4K8ac_peak_823 | 3.7063   |                          |
| 1 | 30065821 | 30066084 | KD2-H4K8ac_peak_824 | 5.82799  |                          |
| 1 | 30104831 | 30105493 | KD2-H4K8ac_peak_825 | 10.05606 |                          |
| 1 | 30105971 | 30106446 | KD2-H4K8ac_peak_826 | 6.99815  |                          |

|   |          |          |                     |          |                                                                              |
|---|----------|----------|---------------------|----------|------------------------------------------------------------------------------|
| 1 | 30107561 | 30108014 | KD2-H4K8ac_peak_827 | 6.97919  |                                                                              |
| 1 | 30119018 | 30119436 | KD2-H4K8ac_peak_828 | 6.44277  |                                                                              |
| 1 | 30124276 | 30124606 | KD2-H4K8ac_peak_829 | 7.67504  |                                                                              |
| 1 | 30157835 | 30158037 | KD2-H4K8ac_peak_830 | 8.4084   |                                                                              |
| 1 | 30161715 | 30162816 | KD2-H4K8ac_peak_831 | 9.72244  |                                                                              |
| 1 | 30171062 | 30171457 | KD2-H4K8ac_peak_832 | 5.30799  |                                                                              |
| 1 | 30180558 | 30181636 | KD2-H4K8ac_peak_833 | 14.68449 | RP4-656G21.1_ENSG00000228176                                                 |
| 1 | 30181851 | 30183003 | KD2-H4K8ac_peak_834 | 9.34195  | RP4-656G21.1_ENSG00000228176                                                 |
| 1 | 30228372 | 30228620 | KD2-H4K8ac_peak_835 | 6.0605   |                                                                              |
| 1 | 30239921 | 30240285 | KD2-H4K8ac_peak_836 | 5.43522  |                                                                              |
| 1 | 30274447 | 30274847 | KD2-H4K8ac_peak_837 | 7.76329  |                                                                              |
| 1 | 30558252 | 30558709 | KD2-H4K8ac_peak_838 | 5.13893  |                                                                              |
| 1 | 30559133 | 30559342 | KD2-H4K8ac_peak_839 | 11.60333 |                                                                              |
| 1 | 30562771 | 30563016 | KD2-H4K8ac_peak_840 | 6.30229  |                                                                              |
| 1 | 30604867 | 30605223 | KD2-H4K8ac_peak_841 | 5.14125  |                                                                              |
| 1 | 30605533 | 30605830 | KD2-H4K8ac_peak_842 | 11.89502 |                                                                              |
| 1 | 30606290 | 30606634 | KD2-H4K8ac_peak_843 | 6.99815  |                                                                              |
| 1 | 30852105 | 30853282 | KD2-H4K8ac_peak_844 | 8.55271  |                                                                              |
| 1 | 31123919 | 31124144 | KD2-H4K8ac_peak_845 | 6.1846   |                                                                              |
| 1 | 31164980 | 31165389 | KD2-H4K8ac_peak_846 | 4.42765  |                                                                              |
| 1 | 31190596 | 31190792 | KD2-H4K8ac_peak_847 | 7.167    | MATN1-AS1_ENSG00000186056                                                    |
| 1 | 31191677 | 31191942 | KD2-H4K8ac_peak_848 | 8.23274  | MATN1-AS1_ENSG00000186056                                                    |
| 1 | 31221390 | 31221729 | KD2-H4K8ac_peak_849 | 4.211    |                                                                              |
| 1 | 31255419 | 31255839 | KD2-H4K8ac_peak_850 | 8.59579  |                                                                              |
| 1 | 31296903 | 31297293 | KD2-H4K8ac_peak_851 | 12.88108 | RP1-65J11.1_ENSG00000223382                                                  |
| 1 | 31361032 | 31361435 | KD2-H4K8ac_peak_852 | 8.10216  |                                                                              |
| 1 | 31381834 | 31382279 | KD2-H4K8ac_peak_853 | 14.8083  | SDC3_ENSG00000162512                                                         |
| 1 | 31386034 | 31386263 | KD2-H4K8ac_peak_854 | 6.2781   |                                                                              |
| 1 | 31627557 | 31627763 | KD2-H4K8ac_peak_855 | 24.48793 |                                                                              |
| 1 | 31635191 | 31635651 | KD2-H4K8ac_peak_856 | 11.05407 |                                                                              |
| 1 | 31711964 | 31713011 | KD2-H4K8ac_peak_857 | 7.07117  | NKAIN1_ENSG00000084628                                                       |
| 1 | 31769291 | 31769572 | KD2-H4K8ac_peak_858 | 9.90914  | SNRNP40_ENSG00000060688;ZCCHC17_ENSG00000121766                              |
| 1 | 31770030 | 31770324 | KD2-H4K8ac_peak_859 | 5.20998  | SNRNP40_ENSG00000060688;ZCCHC17_ENSG00000121766                              |
| 1 | 31846001 | 31846270 | KD2-H4K8ac_peak_860 | 6.83936  |                                                                              |
| 1 | 31886263 | 31887120 | KD2-H4K8ac_peak_861 | 15.01306 |                                                                              |
| 1 | 32014130 | 32014501 | KD2-H4K8ac_peak_862 | 10.46264 |                                                                              |
| 1 | 32040566 | 32041077 | KD2-H4K8ac_peak_863 | 6.24747  | RP11-73M7.1_ENSG00000229167                                                  |
| 1 | 32079577 | 32080082 | KD2-H4K8ac_peak_864 | 10.0692  |                                                                              |
| 1 | 32083037 | 32083253 | KD2-H4K8ac_peak_865 | 5.04237  | HCRTR1_ENSG00000121764                                                       |
| 1 | 32083457 | 32083856 | KD2-H4K8ac_peak_866 | 12.06346 | HCRTR1_ENSG00000121764                                                       |
| 1 | 32091788 | 32094509 | KD2-H4K8ac_peak_867 | 19.9503  |                                                                              |
| 1 | 32095521 | 32095748 | KD2-H4K8ac_peak_868 | 10.30284 |                                                                              |
| 1 | 32109769 | 32110453 | KD2-H4K8ac_peak_869 | 14.12659 | PEF1_ENSG00000162517;RP11-73M7.6_ENSG00000235790;RP11-73M7.9_ENSG00000264078 |
| 1 | 32110950 | 32111233 | KD2-H4K8ac_peak_870 | 5.54647  | PEF1_ENSG00000162517;RP11-73M7.9_ENSG00000264078                             |
| 1 | 32166481 | 32166735 | KD2-H4K8ac_peak_871 | 7.1181   |                                                                              |
| 1 | 32167691 | 32168125 | KD2-H4K8ac_peak_872 | 5.5051   |                                                                              |

|   |          |          |                     |          |                                                      |
|---|----------|----------|---------------------|----------|------------------------------------------------------|
| 1 | 32169389 | 32170195 | KD2-H4K8ac_peak_873 | 7.76329  | COL16A1_ENSG00000084636                              |
| 1 | 32199281 | 32199540 | KD2-H4K8ac_peak_874 | 6.9556   |                                                      |
| 1 | 32226285 | 32226754 | KD2-H4K8ac_peak_875 | 8.69797  |                                                      |
| 1 | 32234874 | 32235077 | KD2-H4K8ac_peak_876 | 9.34195  |                                                      |
| 1 | 32235558 | 32236618 | KD2-H4K8ac_peak_877 | 10.19949 |                                                      |
| 1 | 32241395 | 32241620 | KD2-H4K8ac_peak_878 | 4.98072  |                                                      |
| 1 | 32242199 | 32242598 | KD2-H4K8ac_peak_879 | 4.67342  |                                                      |
| 1 | 32246457 | 32248090 | KD2-H4K8ac_peak_880 | 16.57619 |                                                      |
| 1 | 32248448 | 32248903 | KD2-H4K8ac_peak_881 | 3.90565  |                                                      |
| 1 | 32249361 | 32249674 | KD2-H4K8ac_peak_882 | 4.54006  |                                                      |
| 1 | 32250596 | 32251326 | KD2-H4K8ac_peak_883 | 6.25869  |                                                      |
| 1 | 32253626 | 32254098 | KD2-H4K8ac_peak_884 | 4.67342  | RP11-84A19.3_ENSG00000254545                         |
| 1 | 32279512 | 32280319 | KD2-H4K8ac_peak_885 | 11.03331 |                                                      |
| 1 | 32403574 | 32403854 | KD2-H4K8ac_peak_886 | 7.08474  |                                                      |
| 1 | 32404151 | 32404719 | KD2-H4K8ac_peak_887 | 15.13261 |                                                      |
| 1 | 32420331 | 32420645 | KD2-H4K8ac_peak_888 | 6.78668  |                                                      |
| 1 | 32478177 | 32478521 | KD2-H4K8ac_peak_889 | 5.14125  | KHDRBS1_ENSG00000121774                              |
| 1 | 32478730 | 32479060 | KD2-H4K8ac_peak_890 | 11.03212 | KHDRBS1_ENSG00000121774                              |
| 1 | 32479499 | 32479958 | KD2-H4K8ac_peak_891 | 19.28826 | KHDRBS1_ENSG00000121774                              |
| 1 | 32538108 | 32538338 | KD2-H4K8ac_peak_892 | 9.01262  | RP11-277A4.4_ENSG00000203325;TMEM39B_ENSG00000121775 |
| 1 | 32538600 | 32538795 | KD2-H4K8ac_peak_893 | 8.1235   | RP11-277A4.4_ENSG00000203325;TMEM39B_ENSG00000121775 |
| 1 | 32670887 | 32671642 | KD2-H4K8ac_peak_894 | 8.52559  | RP4-622L5.7_ENSG00000224066;IQCC_ENSG00000160051     |
| 1 | 32681478 | 32681701 | KD2-H4K8ac_peak_895 | 4.77079  |                                                      |
| 1 | 32687516 | 32687835 | KD2-H4K8ac_peak_896 | 6.85193  | TMEM234_ENSG00000160055;EIF3I_ENSG00000084623        |
| 1 | 32688161 | 32688453 | KD2-H4K8ac_peak_897 | 6.13909  | TMEM234_ENSG00000160055;EIF3I_ENSG00000084623        |
| 1 | 32705526 | 32706645 | KD2-H4K8ac_peak_898 | 10.19949 | MTMR9LP_ENSG00000220785                              |
| 1 | 32757693 | 32758006 | KD2-H4K8ac_peak_899 | 12.56039 | HDAC1_ENSG00000116478                                |
| 1 | 32801062 | 32801631 | KD2-H4K8ac_peak_900 | 15.08752 | MARCKSL1_ENSG00000175130                             |
| 1 | 32817310 | 32817526 | KD2-H4K8ac_peak_901 | 5.75757  | TSSK3_ENSG00000162526                                |
| 1 | 32827876 | 32828080 | KD2-H4K8ac_peak_902 | 4.76709  |                                                      |
| 1 | 32859626 | 32859919 | KD2-H4K8ac_peak_903 | 5.53033  | BSDC1_ENSG00000160058                                |
| 1 | 32892500 | 32892785 | KD2-H4K8ac_peak_904 | 5.54647  | LRRRC37A12P_ENSG00000229259                          |
| 1 | 32960371 | 32960707 | KD2-H4K8ac_peak_905 | 7.94441  |                                                      |
| 1 | 32966148 | 32966695 | KD2-H4K8ac_peak_906 | 6.99815  |                                                      |
| 1 | 32966943 | 32967136 | KD2-H4K8ac_peak_907 | 6.66692  |                                                      |
| 1 | 33004794 | 33005047 | KD2-H4K8ac_peak_908 | 9.32235  | ZBTB8A_ENSG00000160062                               |
| 1 | 33116277 | 33116486 | KD2-H4K8ac_peak_909 | 7.36799  | ZBTB8OS_ENSG00000176261;RBBP4_ENSG00000162521        |
| 1 | 33116812 | 33117414 | KD2-H4K8ac_peak_910 | 28.26254 | ZBTB8OS_ENSG00000176261;RBBP4_ENSG00000162521        |
| 1 | 33168394 | 33168860 | KD2-H4K8ac_peak_911 | 9.26408  | SYNC_ENSG00000162520                                 |
| 1 | 33177260 | 33177557 | KD2-H4K8ac_peak_912 | 6.00226  |                                                      |
| 1 | 33178753 | 33179015 | KD2-H4K8ac_peak_913 | 6.40683  |                                                      |
| 1 | 33191074 | 33191277 | KD2-H4K8ac_peak_914 | 7.11925  | RP11-114B7.6_ENSG00000224409                         |
| 1 | 33206803 | 33207248 | KD2-H4K8ac_peak_915 | 5.59859  | KIAA1522_ENSG00000162522                             |
| 1 | 33207573 | 33208084 | KD2-H4K8ac_peak_916 | 10.43145 | KIAA1522_ENSG00000162522                             |
| 1 | 33231272 | 33231498 | KD2-H4K8ac_peak_917 | 9.20193  |                                                      |
| 1 | 33231936 | 33232153 | KD2-H4K8ac_peak_918 | 6.24114  |                                                      |



|   |          |          |                     |          |                                                      |
|---|----------|----------|---------------------|----------|------------------------------------------------------|
| 1 | 33282582 | 33282894 | KD2-H4K8ac_peak_919 | 19.88671 | YARS_ENSG00000134684;S100PBP_ENSG00000116497         |
| 1 | 33283339 | 33284083 | KD2-H4K8ac_peak_920 | 14.43794 | YARS_ENSG00000134684;S100PBP_ENSG00000116497         |
| 1 | 33342284 | 33342521 | KD2-H4K8ac_peak_921 | 4.56666  |                                                      |
| 1 | 33358831 | 33359156 | KD2-H4K8ac_peak_922 | 10.96455 |                                                      |
| 1 | 33366602 | 33367373 | KD2-H4K8ac_peak_923 | 6.84261  | TMEM54_ENSG00000121900                               |
| 1 | 33430206 | 33430440 | KD2-H4K8ac_peak_924 | 11.05467 | RNF19B_ENSG00000116514                               |
| 1 | 33438488 | 33439319 | KD2-H4K8ac_peak_925 | 12.84642 | FKSG48_ENSG00000267885                               |
| 1 | 33502056 | 33502433 | KD2-H4K8ac_peak_926 | 9.31907  |                                                      |
| 1 | 33503150 | 33503472 | KD2-H4K8ac_peak_927 | 10.8368  |                                                      |
| 1 | 33592383 | 33592796 | KD2-H4K8ac_peak_928 | 7.47462  |                                                      |
| 1 | 33619755 | 33619956 | KD2-H4K8ac_peak_929 | 7.993    |                                                      |
| 1 | 33626530 | 33627635 | KD2-H4K8ac_peak_930 | 9.36516  |                                                      |
| 1 | 33720578 | 33721092 | KD2-H4K8ac_peak_931 | 18.05111 |                                                      |
| 1 | 33721343 | 33722266 | KD2-H4K8ac_peak_932 | 15.61313 | ZNF362_ENSG00000160094                               |
| 1 | 33815008 | 33815385 | KD2-H4K8ac_peak_933 | 12.00273 | RP11-415J8.5_ENSG00000233246                         |
| 1 | 33815697 | 33816240 | KD2-H4K8ac_peak_934 | 16.8435  | RP11-415J8.5_ENSG00000233246                         |
| 1 | 33829148 | 33829520 | KD2-H4K8ac_peak_935 | 15.20126 |                                                      |
| 1 | 33938326 | 33938782 | KD2-H4K8ac_peak_936 | 4.8485   | ZSCAN20_ENSG00000121903                              |
| 1 | 34284588 | 34284865 | KD2-H4K8ac_peak_937 | 5.14125  |                                                      |
| 1 | 34285842 | 34286053 | KD2-H4K8ac_peak_938 | 6.61376  |                                                      |
| 1 | 34522687 | 34523251 | KD2-H4K8ac_peak_939 | 9.19305  |                                                      |
| 1 | 35162941 | 35163162 | KD2-H4K8ac_peak_940 | 6.2781   |                                                      |
| 1 | 35324798 | 35325257 | KD2-H4K8ac_peak_941 | 7.76329  | SMIM12_ENSG00000163866                               |
| 1 | 35326028 | 35326425 | KD2-H4K8ac_peak_942 | 7.44366  | SMIM12_ENSG00000163866                               |
| 1 | 35450583 | 35451282 | KD2-H4K8ac_peak_943 | 7.28628  | RP11-244H3.1_ENSG00000241014;ZMYM6NB_ENSG00000243749 |
| 1 | 35496895 | 35497533 | KD2-H4K8ac_peak_944 | 11.89502 | RP11-244H3.4_ENSG00000271741;ZMYM6_ENSG00000163867   |
| 1 | 35528790 | 35529041 | KD2-H4K8ac_peak_945 | 7.51935  |                                                      |
| 1 | 35544552 | 35544754 | KD2-H4K8ac_peak_946 | 5.53033  |                                                      |
| 1 | 35657855 | 35658703 | KD2-H4K8ac_peak_947 | 12.96152 | SFPQ_ENSG00000116560                                 |
| 1 | 35659433 | 35659635 | KD2-H4K8ac_peak_948 | 7.70289  | SFPQ_ENSG00000116560                                 |
| 1 | 35734376 | 35734803 | KD2-H4K8ac_peak_949 | 17.55491 | ZMYM4_ENSG00000146463                                |
| 1 | 36022841 | 36023257 | KD2-H4K8ac_peak_950 | 10.28547 | KIAA0319L_ENSG00000142687;NCDN_ENSG00000020129       |
| 1 | 36023878 | 36024156 | KD2-H4K8ac_peak_951 | 4.52039  | KIAA0319L_ENSG00000142687;NCDN_ENSG00000020129       |
| 1 | 36038946 | 36039141 | KD2-H4K8ac_peak_952 | 7.44324  | TFAP2E_ENSG00000116819                               |
| 1 | 36108105 | 36108401 | KD2-H4K8ac_peak_953 | 9.9363   | PSMB2_ENSG00000126067                                |
| 1 | 36172899 | 36174528 | KD2-H4K8ac_peak_954 | 20.97251 |                                                      |
| 1 | 36184075 | 36184942 | KD2-H4K8ac_peak_955 | 14.8083  | C1orf216_ENSG00000142686                             |
| 1 | 36233630 | 36233922 | KD2-H4K8ac_peak_956 | 4.42765  |                                                      |
| 1 | 36234855 | 36235378 | KD2-H4K8ac_peak_957 | 10.86378 | CLSPN_ENSG00000092853                                |
| 1 | 36272829 | 36274380 | KD2-H4K8ac_peak_958 | 15.82362 | AGO4_ENSG00000134698                                 |
| 1 | 36348348 | 36348552 | KD2-H4K8ac_peak_959 | 7.69287  |                                                      |
| 1 | 36348878 | 36349574 | KD2-H4K8ac_peak_960 | 8.82366  |                                                      |
| 1 | 36396267 | 36396625 | KD2-H4K8ac_peak_961 | 9.63487  | RP4-789D17.5_ENSG00000271914;AGO3_ENSG00000126070    |
| 1 | 36396921 | 36397267 | KD2-H4K8ac_peak_962 | 11.24702 | AGO3_ENSG00000126070                                 |
| 1 | 36550477 | 36550676 | KD2-H4K8ac_peak_963 | 5.30799  | TEKT2_ENSG00000092850                                |
| 1 | 36553966 | 36555010 | KD2-H4K8ac_peak_964 | 15.2334  | ADPRHL2_ENSG00000116863                              |

|   |          |          |                      |          |                                                     |
|---|----------|----------|----------------------|----------|-----------------------------------------------------|
| 1 | 36564961 | 36565198 | KD2-H4K8ac_peak_965  | 5.51783  |                                                     |
| 1 | 36580374 | 36581148 | KD2-H4K8ac_peak_966  | 10.19949 |                                                     |
| 1 | 36590487 | 36591337 | KD2-H4K8ac_peak_967  | 8.79106  | COL8A2_ENSG00000171812                              |
| 1 | 36614795 | 36614995 | KD2-H4K8ac_peak_968  | 8.02571  | TRAPPC3_ENSG00000054116                             |
| 1 | 36615904 | 36616496 | KD2-H4K8ac_peak_969  | 9.36516  | TRAPPC3_ENSG00000054116                             |
| 1 | 36620839 | 36622602 | KD2-H4K8ac_peak_970  | 23.14382 | MAP7D1_ENSG00000116871                              |
| 1 | 36653372 | 36653823 | KD2-H4K8ac_peak_971  | 11.2938  |                                                     |
| 1 | 36668874 | 36669318 | KD2-H4K8ac_peak_972  | 6.99815  |                                                     |
| 1 | 36688872 | 36689098 | KD2-H4K8ac_peak_973  | 7.79898  | THRAP3_ENSG00000054118                              |
| 1 | 36771287 | 36771618 | KD2-H4K8ac_peak_974  | 4.80593  | SH3D21_ENSG00000214193                              |
| 1 | 36772182 | 36772384 | KD2-H4K8ac_peak_975  | 3.90565  | SH3D21_ENSG00000214193                              |
| 1 | 36816896 | 36817252 | KD2-H4K8ac_peak_976  | 5.20908  |                                                     |
| 1 | 36839839 | 36840087 | KD2-H4K8ac_peak_977  | 7.25989  |                                                     |
| 1 | 36852302 | 36852643 | KD2-H4K8ac_peak_978  | 4.68806  | STK40_ENSG00000196182                               |
| 1 | 36863128 | 36863477 | KD2-H4K8ac_peak_979  | 6.25869  | LSM10_ENSG00000181817                               |
| 1 | 36929764 | 36930350 | KD2-H4K8ac_peak_980  | 9.95119  | MRPS15_ENSG00000116898                              |
| 1 | 36941161 | 36941685 | KD2-H4K8ac_peak_981  | 6.66692  |                                                     |
| 1 | 36947320 | 36947595 | KD2-H4K8ac_peak_982  | 7.76569  |                                                     |
| 1 | 36948162 | 36948811 | KD2-H4K8ac_peak_983  | 9.65086  | CSF3R_ENSG00000119535                               |
| 1 | 37233911 | 37234142 | KD2-H4K8ac_peak_984  | 5.40356  |                                                     |
| 1 | 37253339 | 37253534 | KD2-H4K8ac_peak_985  | 9.06703  |                                                     |
| 1 | 37322769 | 37323239 | KD2-H4K8ac_peak_986  | 11.56469 |                                                     |
| 1 | 37331108 | 37331907 | KD2-H4K8ac_peak_987  | 12.46264 |                                                     |
| 1 | 37939781 | 37940293 | KD2-H4K8ac_peak_988  | 9.11031  | LINC01137_ENSG00000233621;ZC3H12A_ENSG00000163874   |
| 1 | 37942811 | 37943263 | KD2-H4K8ac_peak_989  | 6.98292  |                                                     |
| 1 | 37980090 | 37980282 | KD2-H4K8ac_peak_990  | 6.0605   | MEAF6_ENSG00000163875                               |
| 1 | 37980545 | 37980928 | KD2-H4K8ac_peak_991  | 6.76298  | MEAF6_ENSG00000163875                               |
| 1 | 38019479 | 38020323 | KD2-H4K8ac_peak_992  | 16.8435  | SNIP1_ENSG00000163877                               |
| 1 | 38155793 | 38156069 | KD2-H4K8ac_peak_993  | 9.1707   |                                                     |
| 1 | 38156421 | 38156638 | KD2-H4K8ac_peak_994  | 10.46264 |                                                     |
| 1 | 38258922 | 38259953 | KD2-H4K8ac_peak_995  | 14.275   | MANEAL_ENSG00000185090                              |
| 1 | 38273112 | 38273812 | KD2-H4K8ac_peak_996  | 7.28628  | YRDC_ENSG00000196449;C1orf122_ENSG00000197982       |
| 1 | 38274080 | 38274698 | KD2-H4K8ac_peak_997  | 7.26089  | YRDC_ENSG00000196449                                |
| 1 | 38325460 | 38325900 | KD2-H4K8ac_peak_998  | 16.57619 | MTF1_ENSG00000188786;RP11-109P14.10_ENSG00000230955 |
| 1 | 38397166 | 38397385 | KD2-H4K8ac_peak_999  | 12.06346 |                                                     |
| 1 | 38412849 | 38413441 | KD2-H4K8ac_peak_1000 | 9.55735  | INPP5B_ENSG00000204084                              |
| 1 | 38456156 | 38456418 | KD2-H4K8ac_peak_1001 | 5.88845  | SF3A3_ENSG00000183431;RNU6-510P_ENSG00000212541     |
| 1 | 38461524 | 38461760 | KD2-H4K8ac_peak_1002 | 5.00214  |                                                     |
| 1 | 38465221 | 38465518 | KD2-H4K8ac_peak_1003 | 5.88845  |                                                     |
| 1 | 38470866 | 38471188 | KD2-H4K8ac_peak_1004 | 14.15075 | FHL3_ENSG00000183386                                |
| 1 | 38477803 | 38478071 | KD2-H4K8ac_peak_1005 | 12.68903 |                                                     |
| 1 | 38478390 | 38478939 | KD2-H4K8ac_peak_1006 | 18.29344 |                                                     |
| 1 | 38495327 | 38495613 | KD2-H4K8ac_peak_1007 | 4.98072  |                                                     |
| 1 | 39456461 | 39456692 | KD2-H4K8ac_peak_1008 | 10.46264 | AKIRIN1_ENSG00000174574                             |
| 1 | 39491145 | 39491440 | KD2-H4K8ac_peak_1009 | 7.76329  | NDUFS5_ENSG00000168653                              |
| 1 | 39492174 | 39492605 | KD2-H4K8ac_peak_1010 | 6.83936  | NDUFS5_ENSG00000168653                              |

|   |          |          |                      |          |                                                      |
|---|----------|----------|----------------------|----------|------------------------------------------------------|
| 1 | 39546621 | 39546832 | KD2-H4K8ac_peak_1011 | 8.25022  | MACF1_ENSG00000127603                                |
| 1 | 39555768 | 39556058 | KD2-H4K8ac_peak_1012 | 5.04237  |                                                      |
| 1 | 39570406 | 39572030 | KD2-H4K8ac_peak_1013 | 8.85813  |                                                      |
| 1 | 39873784 | 39874285 | KD2-H4K8ac_peak_1014 | 9.06703  |                                                      |
| 1 | 39874949 | 39875259 | KD2-H4K8ac_peak_1015 | 11.90231 | KIAA0754_ENSG00000255103                             |
| 1 | 40024943 | 40025255 | KD2-H4K8ac_peak_1016 | 13.21293 | PPIEL_ENSG00000243970                                |
| 1 | 40025579 | 40025913 | KD2-H4K8ac_peak_1017 | 4.211    |                                                      |
| 1 | 40041716 | 40042379 | KD2-H4K8ac_peak_1018 | 8.86099  | PABPC4_ENSG00000090621                               |
| 1 | 40090654 | 40090864 | KD2-H4K8ac_peak_1019 | 7.07512  |                                                      |
| 1 | 40091859 | 40092472 | KD2-H4K8ac_peak_1020 | 6.66692  |                                                      |
| 1 | 40112307 | 40112575 | KD2-H4K8ac_peak_1021 | 5.71749  |                                                      |
| 1 | 40120637 | 40121055 | KD2-H4K8ac_peak_1022 | 5.28072  |                                                      |
| 1 | 40122451 | 40124167 | KD2-H4K8ac_peak_1023 | 14.00658 |                                                      |
| 1 | 40156776 | 40157063 | KD2-H4K8ac_peak_1024 | 9.08816  | HPCAL4_ENSG00000116983;PPIE_ENSG00000084072          |
| 1 | 40157437 | 40158279 | KD2-H4K8ac_peak_1025 | 7.40314  | HPCAL4_ENSG00000116983;PPIE_ENSG00000084072          |
| 1 | 40204624 | 40204994 | KD2-H4K8ac_peak_1026 | 5.9696   |                                                      |
| 1 | 40254758 | 40255201 | KD2-H4K8ac_peak_1027 | 7.07117  | BMP8B_ENSG00000116985;RP1-118J21.25_ENSG00000261798  |
| 1 | 40292396 | 40292674 | KD2-H4K8ac_peak_1028 | 4.73064  |                                                      |
| 1 | 40348821 | 40349144 | KD2-H4K8ac_peak_1029 | 16.32216 | TRIT1_ENSG00000043514                                |
| 1 | 40349364 | 40349657 | KD2-H4K8ac_peak_1030 | 11.02863 | TRIT1_ENSG00000043514                                |
| 1 | 40367237 | 40367496 | KD2-H4K8ac_peak_1031 | 8.30974  | MYCL_ENSG00000116990                                 |
| 1 | 40367772 | 40368120 | KD2-H4K8ac_peak_1032 | 8.55271  | MYCL_ENSG00000116990                                 |
| 1 | 40506473 | 40506789 | KD2-H4K8ac_peak_1033 | 9.36516  | CAP1_ENSG00000131236                                 |
| 1 | 40562712 | 40563519 | KD2-H4K8ac_peak_1034 | 10.19949 | PPT1_ENSG00000131238                                 |
| 1 | 40626350 | 40626733 | KD2-H4K8ac_peak_1035 | 4.77079  | RLF_ENSG00000117000                                  |
| 1 | 40723125 | 40723579 | KD2-H4K8ac_peak_1036 | 9.1707   | RP1-39G22.7_ENSG00000259943;ZMPSTE24_ENSG00000084073 |
| 1 | 40723998 | 40724458 | KD2-H4K8ac_peak_1037 | 8.52559  | RP1-39G22.7_ENSG00000259943;ZMPSTE24_ENSG00000084073 |
| 1 | 40780556 | 40782361 | KD2-H4K8ac_peak_1038 | 15.81711 |                                                      |
| 1 | 40915403 | 40916924 | KD2-H4K8ac_peak_1039 | 14.98936 | ZFP69B_ENSG00000187801                               |
| 1 | 40974060 | 40974889 | KD2-H4K8ac_peak_1040 | 12.84642 | RP11-656D10.3_ENSG00000238287;EXO5_ENSG00000164002   |
| 1 | 40996772 | 40997065 | KD2-H4K8ac_peak_1041 | 9.72244  | ZNF684_ENSG00000117010                               |
| 1 | 41120572 | 41120833 | KD2-H4K8ac_peak_1042 | 9.15329  |                                                      |
| 1 | 41128576 | 41129063 | KD2-H4K8ac_peak_1043 | 5.53033  |                                                      |
| 1 | 41134425 | 41134656 | KD2-H4K8ac_peak_1044 | 11.27037 |                                                      |
| 1 | 41157392 | 41158235 | KD2-H4K8ac_peak_1045 | 12.57865 | NFYC-AS1_ENSG00000272145;NFYC_ENSG00000066136        |
| 1 | 41249411 | 41249729 | KD2-H4K8ac_peak_1046 | 7.40111  | KCNQ4_ENSG00000117013                                |
| 1 | 41264685 | 41264890 | KD2-H4K8ac_peak_1047 | 5.57044  |                                                      |
| 1 | 41268290 | 41268524 | KD2-H4K8ac_peak_1048 | 8.37231  |                                                      |
| 1 | 41349793 | 41350369 | KD2-H4K8ac_peak_1049 | 9.11031  |                                                      |
| 1 | 41414285 | 41414551 | KD2-H4K8ac_peak_1050 | 10.86378 |                                                      |
| 1 | 41444516 | 41446171 | KD2-H4K8ac_peak_1051 | 12.82393 | CTPS1_ENSG00000171793                                |
| 1 | 41707101 | 41707786 | KD2-H4K8ac_peak_1052 | 20.58734 | SCMH1_ENSG00000010803;RP11-399E6.1_ENSG00000235358   |
| 1 | 41707980 | 41708523 | KD2-H4K8ac_peak_1053 | 20.18584 | SCMH1_ENSG00000010803;RP11-399E6.1_ENSG00000235358   |
| 1 | 41823180 | 41823480 | KD2-H4K8ac_peak_1054 | 5.42867  |                                                      |
| 1 | 41831591 | 41832710 | KD2-H4K8ac_peak_1055 | 20.90492 |                                                      |
| 1 | 41847438 | 41848673 | KD2-H4K8ac_peak_1056 | 12.84642 |                                                      |

|   |          |          |                      |          |                                                     |
|---|----------|----------|----------------------|----------|-----------------------------------------------------|
| 1 | 41897530 | 41898020 | KD2-H4K8ac_peak_1057 | 13.12608 |                                                     |
| 1 | 41898687 | 41899198 | KD2-H4K8ac_peak_1058 | 8.82366  |                                                     |
| 1 | 41908189 | 41908691 | KD2-H4K8ac_peak_1059 | 18.29344 |                                                     |
| 1 | 41921105 | 41921572 | KD2-H4K8ac_peak_1060 | 12.3187  |                                                     |
| 1 | 41940369 | 41940693 | KD2-H4K8ac_peak_1061 | 8.4716   |                                                     |
| 1 | 41948124 | 41948413 | KD2-H4K8ac_peak_1062 | 7.96322  |                                                     |
| 1 | 41967250 | 41967481 | KD2-H4K8ac_peak_1063 | 5.30799  |                                                     |
| 1 | 41968369 | 41968863 | KD2-H4K8ac_peak_1064 | 5.75757  |                                                     |
| 1 | 41970504 | 41970753 | KD2-H4K8ac_peak_1065 | 5.18553  |                                                     |
| 1 | 41972780 | 41973224 | KD2-H4K8ac_peak_1066 | 5.82799  |                                                     |
| 1 | 41981979 | 41982613 | KD2-H4K8ac_peak_1067 | 22.39508 |                                                     |
| 1 | 41987440 | 41987736 | KD2-H4K8ac_peak_1068 | 5.14125  |                                                     |
| 1 | 42078573 | 42078875 | KD2-H4K8ac_peak_1069 | 6.25869  |                                                     |
| 1 | 42128161 | 42128409 | KD2-H4K8ac_peak_1070 | 4.211    |                                                     |
| 1 | 42178414 | 42178611 | KD2-H4K8ac_peak_1071 | 4.54006  |                                                     |
| 1 | 42179404 | 42179612 | KD2-H4K8ac_peak_1072 | 7.98621  |                                                     |
| 1 | 42181784 | 42182224 | KD2-H4K8ac_peak_1073 | 5.59859  |                                                     |
| 1 | 42199252 | 42199448 | KD2-H4K8ac_peak_1074 | 5.15777  |                                                     |
| 1 | 42500970 | 42501259 | KD2-H4K8ac_peak_1075 | 13.81781 | HIVEP3_ENSG00000127124                              |
| 1 | 42501856 | 42502098 | KD2-H4K8ac_peak_1076 | 12.42761 | HIVEP3_ENSG00000127124                              |
| 1 | 42800254 | 42800834 | KD2-H4K8ac_peak_1077 | 8.55271  | FOXJ3_ENSG00000198815                               |
| 1 | 42801110 | 42801635 | KD2-H4K8ac_peak_1078 | 13.80319 | FOXJ3_ENSG00000198815                               |
| 1 | 42845849 | 42846266 | KD2-H4K8ac_peak_1079 | 9.6247   | RIMKLA_ENSG00000177181                              |
| 1 | 42846535 | 42847052 | KD2-H4K8ac_peak_1080 | 8.52559  | RIMKLA_ENSG00000177181                              |
| 1 | 42920730 | 42921087 | KD2-H4K8ac_peak_1081 | 5.57044  | ZMYND12_ENSG00000066185;PPCS_ENSG00000127125        |
| 1 | 42921422 | 42922610 | KD2-H4K8ac_peak_1082 | 13.48341 | ZMYND12_ENSG00000066185;PPCS_ENSG00000127125        |
| 1 | 43124139 | 43124685 | KD2-H4K8ac_peak_1083 | 14.45402 | PIIH_ENSG00000171960                                |
| 1 | 43147419 | 43147777 | KD2-H4K8ac_peak_1084 | 5.14125  | YBX1_ENSG00000065978                                |
| 1 | 43148150 | 43149036 | KD2-H4K8ac_peak_1085 | 12.3187  | YBX1_ENSG00000065978                                |
| 1 | 43222340 | 43222721 | KD2-H4K8ac_peak_1086 | 7.12754  |                                                     |
| 1 | 43233013 | 43233217 | KD2-H4K8ac_peak_1087 | 8.07129  | LEPRE1_ENSG00000117385;C1orf50_ENSG00000164008      |
| 1 | 43281983 | 43282604 | KD2-H4K8ac_peak_1088 | 7.40111  | CCDC23_ENSG00000177868;ERMAP_ENSG00000164010        |
| 1 | 43312340 | 43312742 | KD2-H4K8ac_peak_1089 | 21.75906 | RP11-342M1.3_ENSG00000228192;ZNF691_ENSG00000164011 |
| 1 | 43390155 | 43390507 | KD2-H4K8ac_peak_1090 | 15.59949 |                                                     |
| 1 | 43390719 | 43391068 | KD2-H4K8ac_peak_1091 | 8.1233   |                                                     |
| 1 | 43419072 | 43419386 | KD2-H4K8ac_peak_1092 | 4.98072  |                                                     |
| 1 | 43425238 | 43425518 | KD2-H4K8ac_peak_1093 | 5.45396  | SLC2A1_ENSG00000117394;SLC2A1-AS1_ENSG00000227533   |
| 1 | 43450199 | 43450492 | KD2-H4K8ac_peak_1094 | 6.99815  |                                                     |
| 1 | 43450870 | 43451146 | KD2-H4K8ac_peak_1095 | 3.75035  |                                                     |
| 1 | 43459402 | 43459601 | KD2-H4K8ac_peak_1096 | 7.0983   |                                                     |
| 1 | 43471547 | 43472337 | KD2-H4K8ac_peak_1097 | 16.32216 |                                                     |
| 1 | 43524227 | 43524812 | KD2-H4K8ac_peak_1098 | 7.47462  |                                                     |
| 1 | 43527344 | 43527557 | KD2-H4K8ac_peak_1099 | 6.16888  |                                                     |
| 1 | 43533683 | 43534431 | KD2-H4K8ac_peak_1100 | 12.57297 |                                                     |
| 1 | 43534671 | 43534941 | KD2-H4K8ac_peak_1101 | 8.10216  |                                                     |
| 1 | 43637690 | 43637936 | KD2-H4K8ac_peak_1102 | 8.4716   | WDR65_ENSG00000243710                               |

|   |          |          |                      |          |                                                                                                    |
|---|----------|----------|----------------------|----------|----------------------------------------------------------------------------------------------------|
| 1 | 43814234 | 43815252 | KD2-H4K8ac_peak_1103 | 17.70837 |                                                                                                    |
| 1 | 43824110 | 43824309 | KD2-H4K8ac_peak_1104 | 5.30799  | RP1-92O14.3_ENSG00000234694;CDC20_ENSG00000117399                                                  |
| 1 | 43832841 | 43833175 | KD2-H4K8ac_peak_1105 | 4.67342  | ELOVL1_ENSG00000066322                                                                             |
| 1 | 43833398 | 43833641 | KD2-H4K8ac_peak_1106 | 14.15075 | ELOVL1_ENSG00000066322                                                                             |
| 1 | 43833899 | 43834190 | KD2-H4K8ac_peak_1107 | 6.25869  | ELOVL1_ENSG00000066322                                                                             |
| 1 | 43855064 | 43855402 | KD2-H4K8ac_peak_1108 | 5.9696   | MED8_ENSG00000159479;SZT2_ENSG00000198198                                                          |
| 1 | 43855601 | 43855871 | KD2-H4K8ac_peak_1109 | 15.52826 | MED8_ENSG00000159479;SZT2_ENSG00000198198                                                          |
| 1 | 43919126 | 43920268 | KD2-H4K8ac_peak_1110 | 10.05606 | HYI_ENSG00000178922;HYI-AS1_ENSG00000229348                                                        |
| 1 | 43996692 | 43996885 | KD2-H4K8ac_peak_1111 | 5.61067  |                                                                                                    |
| 1 | 44031202 | 44031437 | KD2-H4K8ac_peak_1112 | 5.82799  |                                                                                                    |
| 1 | 44116216 | 44116502 | KD2-H4K8ac_peak_1113 | 5.88845  | KDM4A_ENSG00000066135                                                                              |
| 1 | 44173268 | 44173498 | KD2-H4K8ac_peak_1114 | 11.00004 | KDM4A-AS1_ENSG00000236200                                                                          |
| 1 | 44300142 | 44300395 | KD2-H4K8ac_peak_1115 | 4.20044  |                                                                                                    |
| 1 | 44378413 | 44378702 | KD2-H4K8ac_peak_1116 | 9.11031  |                                                                                                    |
| 1 | 44401502 | 44402054 | KD2-H4K8ac_peak_1117 | 12.70983 |                                                                                                    |
| 1 | 44412352 | 44412566 | KD2-H4K8ac_peak_1118 | 15.58442 | RP11-7O11.3_ENSG00000237950;IPO13_ENSG00000117408                                                  |
| 1 | 44435760 | 44436194 | KD2-H4K8ac_peak_1119 | 8.85813  | DPH2_ENSG00000132768                                                                               |
| 1 | 44439956 | 44440475 | KD2-H4K8ac_peak_1120 | 18.68066 | ATP6V0B_ENSG00000117410                                                                            |
| 1 | 44440696 | 44440919 | KD2-H4K8ac_peak_1121 | 6.90231  | ATP6V0B_ENSG00000117410                                                                            |
| 1 | 44445113 | 44445638 | KD2-H4K8ac_peak_1122 | 13.80019 | B4GALT2_ENSG00000117411                                                                            |
| 1 | 44456941 | 44458252 | KD2-H4K8ac_peak_1123 | 15.66774 | CCDC24_ENSG00000159214                                                                             |
| 1 | 44461178 | 44461881 | KD2-H4K8ac_peak_1124 | 12.17278 |                                                                                                    |
| 1 | 44462350 | 44463012 | KD2-H4K8ac_peak_1125 | 10.53377 |                                                                                                    |
| 1 | 44495437 | 44496511 | KD2-H4K8ac_peak_1126 | 16.8435  | SLC6A9_ENSG00000196517                                                                             |
| 1 | 44496950 | 44497572 | KD2-H4K8ac_peak_1127 | 6.90231  | SLC6A9_ENSG00000196517                                                                             |
| 1 | 44501902 | 44502763 | KD2-H4K8ac_peak_1128 | 15.77481 | RP5-1198O20.4_ENSG00000230615                                                                      |
| 1 | 44513226 | 44513465 | KD2-H4K8ac_peak_1129 | 10.99365 |                                                                                                    |
| 1 | 44678410 | 44678785 | KD2-H4K8ac_peak_1130 | 7.47462  | DMAP1_ENSG00000178028                                                                              |
| 1 | 44679131 | 44679564 | KD2-H4K8ac_peak_1131 | 13.3695  | DMAP1_ENSG00000178028                                                                              |
| 1 | 44821268 | 44821923 | KD2-H4K8ac_peak_1132 | 10.39154 | ERI3_ENSG00000117419                                                                               |
| 1 | 45097056 | 45098313 | KD2-H4K8ac_peak_1133 | 16.04168 |                                                                                                    |
| 1 | 45241350 | 45241651 | KD2-H4K8ac_peak_1134 | 5.9696   | RP11-269F19.2_ENSG00000225721;RPS8_ENSG00000142937;SNORD55_ENSG00000264294;SNORD46_ENSG00000200913 |
| 1 | 45251990 | 45252279 | KD2-H4K8ac_peak_1135 | 8.1233   |                                                                                                    |
| 1 | 45265236 | 45265470 | KD2-H4K8ac_peak_1136 | 11.03331 | PLK3_ENSG00000173846                                                                               |
| 1 | 45265664 | 45265898 | KD2-H4K8ac_peak_1137 | 14.66631 | PLK3_ENSG00000173846                                                                               |
| 1 | 45266094 | 45266356 | KD2-H4K8ac_peak_1138 | 8.52559  | PLK3_ENSG00000173846                                                                               |
| 1 | 45273700 | 45274144 | KD2-H4K8ac_peak_1139 | 8.14467  | TCTEX1D4_ENSG00000188396;BTBD19_ENSG00000222009                                                    |
| 1 | 45278734 | 45279831 | KD2-H4K8ac_peak_1140 | 22.65017 |                                                                                                    |
| 1 | 45280083 | 45280828 | KD2-H4K8ac_peak_1141 | 7.47462  |                                                                                                    |
| 1 | 45285742 | 45286069 | KD2-H4K8ac_peak_1142 | 4.211    | RNU5E-6P_ENSG00000202444                                                                           |
| 1 | 45308595 | 45308865 | KD2-H4K8ac_peak_1143 | 9.16531  | PTCH2_ENSG00000117425;RP5-882O7.1_ENSG00000226499                                                  |
| 1 | 45411908 | 45412241 | KD2-H4K8ac_peak_1144 | 8.23274  |                                                                                                    |
| 1 | 45414568 | 45414897 | KD2-H4K8ac_peak_1145 | 7.29632  |                                                                                                    |
| 1 | 45452470 | 45452743 | KD2-H4K8ac_peak_1146 | 6.40297  | EIF2B3_ENSG00000070785                                                                             |
| 1 | 45671780 | 45672152 | KD2-H4K8ac_peak_1147 | 7.07117  |                                                                                                    |
| 1 | 45769585 | 45770377 | KD2-H4K8ac_peak_1148 | 11.24702 |                                                                                                    |

|   |          |          |                      |          |                                                 |
|---|----------|----------|----------------------|----------|-------------------------------------------------|
| 1 | 45792257 | 45793142 | KD2-H4K8ac_peak_1149 | 14.00658 | HPDL_ENSG00000186603                            |
| 1 | 45805862 | 45806063 | KD2-H4K8ac_peak_1150 | 5.59859  | MUTYH_ENSG00000132781;TOE1_ENSG00000132773      |
| 1 | 45966130 | 45966396 | KD2-H4K8ac_peak_1151 | 4.42765  | CCDC163P_ENSG00000236624;MMACHC_ENSG00000132763 |
| 1 | 45987242 | 45987494 | KD2-H4K8ac_peak_1152 | 8.55271  |                                                 |
| 1 | 46016191 | 46016954 | KD2-H4K8ac_peak_1153 | 11.86082 | AKR1A1_ENSG00000117448                          |
| 1 | 46049794 | 46050099 | KD2-H4K8ac_peak_1154 | 9.06369  | NASP_ENSG00000132780                            |
| 1 | 46152422 | 46152683 | KD2-H4K8ac_peak_1155 | 8.86099  | TMEM69_ENSG00000159596                          |
| 1 | 46153450 | 46153730 | KD2-H4K8ac_peak_1156 | 6.05809  | GPBP1L1_ENSG00000159592;TMEM69_ENSG00000159596  |
| 1 | 46154667 | 46154885 | KD2-H4K8ac_peak_1157 | 8.12706  | GPBP1L1_ENSG00000159592                         |
| 1 | 46201560 | 46201787 | KD2-H4K8ac_peak_1158 | 6.40683  |                                                 |
| 1 | 46215482 | 46216312 | KD2-H4K8ac_peak_1159 | 16.71655 | IPP_ENSG00000197429                             |
| 1 | 46216706 | 46217371 | KD2-H4K8ac_peak_1160 | 12.26331 | IPP_ENSG00000197429                             |
| 1 | 46268164 | 46268700 | KD2-H4K8ac_peak_1161 | 8.1718   |                                                 |
| 1 | 46598387 | 46598583 | KD2-H4K8ac_peak_1162 | 12.30509 |                                                 |
| 1 | 46598914 | 46599380 | KD2-H4K8ac_peak_1163 | 7.76104  | RP4-533D7.5_ENSG00000227857                     |
| 1 | 46663782 | 46664776 | KD2-H4K8ac_peak_1164 | 11.3394  |                                                 |
| 1 | 46668758 | 46669281 | KD2-H4K8ac_peak_1165 | 14.56955 | LURAP1_ENSG00000171357                          |
| 1 | 46712644 | 46712983 | KD2-H4K8ac_peak_1166 | 5.43522  | RAD54L_ENSG00000085999                          |
| 1 | 46766921 | 46768936 | KD2-H4K8ac_peak_1167 | 15.66774 | LRRC41_ENSG00000132128;UQCRH_ENSG00000173660    |
| 1 | 46805316 | 46805658 | KD2-H4K8ac_peak_1168 | 9.48012  | NSUN4_ENSG00000117481                           |
| 1 | 46805899 | 46806812 | KD2-H4K8ac_peak_1169 | 16.72302 | NSUN4_ENSG00000117481                           |
| 1 | 46871944 | 46872160 | KD2-H4K8ac_peak_1170 | 7.47462  |                                                 |
| 1 | 47082333 | 47082681 | KD2-H4K8ac_peak_1171 | 5.9696   | MKNK1_ENSG00000079277;MOB3C_ENSG00000142961     |
| 1 | 47082962 | 47083329 | KD2-H4K8ac_peak_1172 | 6.66692  | MKNK1_ENSG00000079277;MOB3C_ENSG00000142961     |
| 1 | 47133335 | 47134014 | KD2-H4K8ac_peak_1173 | 6.99815  | TEX38_ENSG00000186118                           |
| 1 | 47134267 | 47134956 | KD2-H4K8ac_peak_1174 | 7.13615  | TEX38_ENSG00000186118                           |
| 1 | 47184010 | 47185144 | KD2-H4K8ac_peak_1175 | 5.30799  | EFCAB14_ENSG00000159658                         |
| 1 | 47780409 | 47781300 | KD2-H4K8ac_peak_1176 | 9.31907  | STIL_ENSG00000123473                            |
| 1 | 47799547 | 47799853 | KD2-H4K8ac_peak_1177 | 18.29344 | CMPK1_ENSG00000162368                           |
| 1 | 47800086 | 47800399 | KD2-H4K8ac_peak_1178 | 13.44374 | CMPK1_ENSG00000162368                           |
| 1 | 47973982 | 47974415 | KD2-H4K8ac_peak_1179 | 5.13615  |                                                 |
| 1 | 48104184 | 48104454 | KD2-H4K8ac_peak_1180 | 4.66652  |                                                 |
| 1 | 48154001 | 48154198 | KD2-H4K8ac_peak_1181 | 5.20908  | RP11-543D5.1_ENSG00000227947                    |
| 1 | 48313983 | 48314239 | KD2-H4K8ac_peak_1182 | 5.20998  |                                                 |
| 1 | 48315244 | 48315461 | KD2-H4K8ac_peak_1183 | 5.88845  |                                                 |
| 1 | 48382002 | 48382277 | KD2-H4K8ac_peak_1184 | 6.40683  |                                                 |
| 1 | 48937384 | 48937749 | KD2-H4K8ac_peak_1185 | 5.88845  | SPATA6_ENSG00000132122                          |
| 1 | 48938145 | 48938572 | KD2-H4K8ac_peak_1186 | 8.5781   | SPATA6_ENSG00000132122                          |
| 1 | 49242924 | 49243599 | KD2-H4K8ac_peak_1187 | 6.40683  | BEND5_ENSG00000162373                           |
| 1 | 49353932 | 49354264 | KD2-H4K8ac_peak_1188 | 7.29632  |                                                 |
| 1 | 49383768 | 49384235 | KD2-H4K8ac_peak_1189 | 6.56211  |                                                 |
| 1 | 49514308 | 49514584 | KD2-H4K8ac_peak_1190 | 5.20908  | RP11-141A19.1_ENSG00000229846                   |
| 1 | 50513788 | 50514015 | KD2-H4K8ac_peak_1191 | 9.95759  | ELAVL4_ENSG00000162374                          |
| 1 | 50571326 | 50571567 | KD2-H4K8ac_peak_1192 | 5.25071  |                                                 |
| 1 | 50574020 | 50574362 | KD2-H4K8ac_peak_1193 | 6.16888  |                                                 |
| 1 | 50575220 | 50575745 | KD2-H4K8ac_peak_1194 | 5.25071  |                                                 |

|   |          |          |                      |          |                                                       |
|---|----------|----------|----------------------|----------|-------------------------------------------------------|
| 1 | 50576051 | 50576461 | KD2-H4K8ac_peak_1195 | 12.42547 |                                                       |
| 1 | 50717182 | 50717472 | KD2-H4K8ac_peak_1196 | 9.51625  |                                                       |
| 1 | 50730600 | 50731531 | KD2-H4K8ac_peak_1197 | 12.68903 |                                                       |
| 1 | 50737393 | 50737758 | KD2-H4K8ac_peak_1198 | 5.32397  |                                                       |
| 1 | 50739432 | 50739712 | KD2-H4K8ac_peak_1199 | 5.13615  |                                                       |
| 1 | 50741565 | 50742140 | KD2-H4K8ac_peak_1200 | 14.66631 |                                                       |
| 1 | 50742543 | 50742966 | KD2-H4K8ac_peak_1201 | 9.36516  |                                                       |
| 1 | 50743541 | 50743771 | KD2-H4K8ac_peak_1202 | 7.13615  |                                                       |
| 1 | 51433924 | 51434148 | KD2-H4K8ac_peak_1203 | 9.20193  |                                                       |
| 1 | 51434658 | 51435209 | KD2-H4K8ac_peak_1204 | 4.86324  |                                                       |
| 1 | 51442632 | 51444017 | KD2-H4K8ac_peak_1205 | 23.27293 |                                                       |
| 1 | 51762542 | 51763102 | KD2-H4K8ac_peak_1206 | 11.90231 |                                                       |
| 1 | 51791620 | 51791928 | KD2-H4K8ac_peak_1207 | 6.44277  |                                                       |
| 1 | 51795858 | 51796852 | KD2-H4K8ac_peak_1208 | 20.78681 | RP11-275F13.1_ENSG00000261664                         |
| 1 | 51797134 | 51797367 | KD2-H4K8ac_peak_1209 | 7.36799  |                                                       |
| 1 | 51887977 | 51888383 | KD2-H4K8ac_peak_1210 | 4.37708  |                                                       |
| 1 | 52081854 | 52082255 | KD2-H4K8ac_peak_1211 | 5.54647  |                                                       |
| 1 | 52194895 | 52195246 | KD2-H4K8ac_peak_1212 | 11.70505 |                                                       |
| 1 | 52195545 | 52195809 | KD2-H4K8ac_peak_1213 | 10.96455 |                                                       |
| 1 | 52343659 | 52344357 | KD2-H4K8ac_peak_1214 | 7.36799  | NRD1_ENSG00000078618                                  |
| 1 | 52344968 | 52345761 | KD2-H4K8ac_peak_1215 | 15.83877 | NRD1_ENSG00000078618                                  |
| 1 | 52499080 | 52499434 | KD2-H4K8ac_peak_1216 | 8.26945  | KTI12_ENSG00000198841;RP11-91A18.4_ENSG00000223390    |
| 1 | 52521996 | 52522615 | KD2-H4K8ac_peak_1217 | 23.22963 | TXNDC12_ENSG00000117862;BTF3L4_ENSG00000134717        |
| 1 | 52607258 | 52607459 | KD2-H4K8ac_peak_1218 | 5.51783  | ZFYVE9_ENSG00000157077                                |
| 1 | 52607832 | 52608337 | KD2-H4K8ac_peak_1219 | 5.4779   | ZFYVE9_ENSG00000157077                                |
| 1 | 52831447 | 52831764 | KD2-H4K8ac_peak_1220 | 11.80283 | CC2D1B_ENSG00000154222                                |
| 1 | 52834119 | 52834612 | KD2-H4K8ac_peak_1221 | 5.9696   | PLA2G12AP1_ENSG00000224680                            |
| 1 | 53018353 | 53018706 | KD2-H4K8ac_peak_1222 | 12.14738 | ZCCHC11_ENSG00000134744                               |
| 1 | 53019280 | 53019694 | KD2-H4K8ac_peak_1223 | 19.33018 | RP11-25O10.2_ENSG00000272371;ZCCHC11_ENSG00000134744  |
| 1 | 53067113 | 53067487 | KD2-H4K8ac_peak_1224 | 5.54647  | GPX7_ENSG00000116157                                  |
| 1 | 53067777 | 53068602 | KD2-H4K8ac_peak_1225 | 16.71655 | GPX7_ENSG00000116157                                  |
| 1 | 53098602 | 53099360 | KD2-H4K8ac_peak_1226 | 11.22681 | FAM159A_ENSG00000182183                               |
| 1 | 53128803 | 53129067 | KD2-H4K8ac_peak_1227 | 4.77079  |                                                       |
| 1 | 53163371 | 53164448 | KD2-H4K8ac_peak_1228 | 10.43145 | COA7_ENSG00000162377                                  |
| 1 | 53192194 | 53192509 | KD2-H4K8ac_peak_1229 | 14.74047 | ZYG11B_ENSG00000162378                                |
| 1 | 53308581 | 53309014 | KD2-H4K8ac_peak_1230 | 6.0605   | ZYG11A_ENSG00000203995                                |
| 1 | 53527304 | 53527662 | KD2-H4K8ac_peak_1231 | 8.30974  | PODN_ENSG00000174348                                  |
| 1 | 53527861 | 53528480 | KD2-H4K8ac_peak_1232 | 7.07117  | PODN_ENSG00000174348                                  |
| 1 | 53587204 | 53587620 | KD2-H4K8ac_peak_1233 | 5.82799  |                                                       |
| 1 | 53661799 | 53662015 | KD2-H4K8ac_peak_1234 | 10.96455 | CPT2_ENSG00000157184                                  |
| 1 | 53686082 | 53686599 | KD2-H4K8ac_peak_1235 | 9.11891  | C1orf123_ENSG00000162384;RP5-1024G6.7_ENSG00000259818 |
| 1 | 53703909 | 53705087 | KD2-H4K8ac_peak_1236 | 5.75757  | MAGOH_ENSG00000162385;RP5-1024G6.5_ENSG00000226754    |
| 1 | 53780071 | 53780550 | KD2-H4K8ac_peak_1237 | 6.18308  |                                                       |
| 1 | 53781487 | 53781752 | KD2-H4K8ac_peak_1238 | 7.20567  |                                                       |
| 1 | 53782092 | 53782459 | KD2-H4K8ac_peak_1239 | 8.36432  |                                                       |
| 1 | 53782899 | 53784042 | KD2-H4K8ac_peak_1240 | 10.59979 |                                                       |

|   |          |          |                      |          |                                                                        |
|---|----------|----------|----------------------|----------|------------------------------------------------------------------------|
| 1 | 53784912 | 53785329 | KD2-H4K8ac_peak_1241 | 5.54647  |                                                                        |
| 1 | 53786358 | 53786606 | KD2-H4K8ac_peak_1242 | 5.70596  |                                                                        |
| 1 | 53791324 | 53791845 | KD2-H4K8ac_peak_1243 | 8.30974  |                                                                        |
| 1 | 53793323 | 53793687 | KD2-H4K8ac_peak_1244 | 7.79741  | LRP8_ENSG00000157193;RP4-784A16.5_ENSG00000225675                      |
| 1 | 53793893 | 53794371 | KD2-H4K8ac_peak_1245 | 8.98093  | LRP8_ENSG00000157193;RP4-784A16.5_ENSG00000225675                      |
| 1 | 53794695 | 53795184 | KD2-H4K8ac_peak_1246 | 7.47462  | LRP8_ENSG00000157193;RP4-784A16.5_ENSG00000225675                      |
| 1 | 53833292 | 53833564 | KD2-H4K8ac_peak_1247 | 8.85813  | RP11-117D22.2_ENSG00000230138                                          |
| 1 | 53834317 | 53834712 | KD2-H4K8ac_peak_1248 | 9.61895  | RP11-117D22.2_ENSG00000230138                                          |
| 1 | 53835891 | 53836174 | KD2-H4K8ac_peak_1249 | 5.08628  |                                                                        |
| 1 | 53874928 | 53875133 | KD2-H4K8ac_peak_1250 | 8.23274  |                                                                        |
| 1 | 53928517 | 53928856 | KD2-H4K8ac_peak_1251 | 5.20908  |                                                                        |
| 1 | 53976937 | 53977298 | KD2-H4K8ac_peak_1252 | 8.55271  |                                                                        |
| 1 | 53978376 | 53978876 | KD2-H4K8ac_peak_1253 | 11.22681 |                                                                        |
| 1 | 53991630 | 53993376 | KD2-H4K8ac_peak_1254 | 11.11797 |                                                                        |
| 1 | 54009520 | 54009719 | KD2-H4K8ac_peak_1255 | 4.42765  |                                                                        |
| 1 | 54048809 | 54049318 | KD2-H4K8ac_peak_1256 | 11.47476 |                                                                        |
| 1 | 54049599 | 54050276 | KD2-H4K8ac_peak_1257 | 6.2781   |                                                                        |
| 1 | 54051389 | 54051581 | KD2-H4K8ac_peak_1258 | 7.27716  |                                                                        |
| 1 | 54055717 | 54056015 | KD2-H4K8ac_peak_1259 | 7.09076  |                                                                        |
| 1 | 54134895 | 54135384 | KD2-H4K8ac_peak_1260 | 4.86324  |                                                                        |
| 1 | 54150725 | 54151054 | KD2-H4K8ac_peak_1261 | 5.29555  |                                                                        |
| 1 | 54303504 | 54304093 | KD2-H4K8ac_peak_1262 | 9.63487  | NDC1_ENSG00000058804                                                   |
| 1 | 54411716 | 54411941 | KD2-H4K8ac_peak_1263 | 14.66631 | HSPB11_ENSG00000081870;LRRC42_ENSG00000116212                          |
| 1 | 54494085 | 54494516 | KD2-H4K8ac_peak_1264 | 7.12754  | RP4-758J24.5_ENSG00000272091                                           |
| 1 | 54519356 | 54519647 | KD2-H4K8ac_peak_1265 | 8.10216  | TMEM59_ENSG00000116209;TCEANC2_ENSG00000116205;MIR4781_ENSG00000264208 |
| 1 | 54586923 | 54587264 | KD2-H4K8ac_peak_1266 | 8.30974  |                                                                        |
| 1 | 54601506 | 54601720 | KD2-H4K8ac_peak_1267 | 6.50927  |                                                                        |
| 1 | 54665890 | 54666215 | KD2-H4K8ac_peak_1268 | 13.21979 | RP11-446E24.4_ENSG00000256407;CYB5RL_ENSG00000215883                   |
| 1 | 54694325 | 54694663 | KD2-H4K8ac_peak_1269 | 8.83582  |                                                                        |
| 1 | 54752305 | 54752584 | KD2-H4K8ac_peak_1270 | 4.86324  |                                                                        |
| 1 | 54762929 | 54763428 | KD2-H4K8ac_peak_1271 | 12.17789 |                                                                        |
| 1 | 54763650 | 54764109 | KD2-H4K8ac_peak_1272 | 6.30229  |                                                                        |
| 1 | 54775649 | 54775971 | KD2-H4K8ac_peak_1273 | 8.33649  |                                                                        |
| 1 | 54792177 | 54792791 | KD2-H4K8ac_peak_1274 | 6.25869  |                                                                        |
| 1 | 54793772 | 54794018 | KD2-H4K8ac_peak_1275 | 7.43041  |                                                                        |
| 1 | 54821407 | 54821734 | KD2-H4K8ac_peak_1276 | 5.80056  |                                                                        |
| 1 | 54871010 | 54871388 | KD2-H4K8ac_peak_1277 | 6.66692  |                                                                        |
| 1 | 54872905 | 54873260 | KD2-H4K8ac_peak_1278 | 4.42765  |                                                                        |
| 1 | 54940355 | 54941706 | KD2-H4K8ac_peak_1279 | 7.07117  |                                                                        |
| 1 | 54942248 | 54942588 | KD2-H4K8ac_peak_1280 | 6.66692  |                                                                        |
| 1 | 54946035 | 54946412 | KD2-H4K8ac_peak_1281 | 5.88845  |                                                                        |
| 1 | 54952516 | 54952748 | KD2-H4K8ac_peak_1282 | 7.52168  |                                                                        |
| 1 | 54953344 | 54953982 | KD2-H4K8ac_peak_1283 | 14.43704 |                                                                        |
| 1 | 54954519 | 54954784 | KD2-H4K8ac_peak_1284 | 10.43145 |                                                                        |
| 1 | 54956640 | 54956861 | KD2-H4K8ac_peak_1285 | 5.77265  |                                                                        |
| 1 | 54964519 | 54965707 | KD2-H4K8ac_peak_1286 | 11.89502 |                                                                        |



|   |          |          |                      |          |                                                                                |
|---|----------|----------|----------------------|----------|--------------------------------------------------------------------------------|
| 1 | 55007532 | 55008268 | KD2-H4K8ac_peak_1287 | 15.50901 | ACOT11_ENSG00000162390                                                         |
| 1 | 55009523 | 55009725 | KD2-H4K8ac_peak_1288 | 8.55271  |                                                                                |
| 1 | 55024427 | 55024673 | KD2-H4K8ac_peak_1289 | 4.77079  |                                                                                |
| 1 | 55180625 | 55181384 | KD2-H4K8ac_peak_1290 | 12.00273 | TTC4_ENSG00000243725                                                           |
| 1 | 55181599 | 55181848 | KD2-H4K8ac_peak_1291 | 5.75757  | TTC4_ENSG00000243725                                                           |
| 1 | 55229677 | 55230126 | KD2-H4K8ac_peak_1292 | 6.25869  | PARS2_ENSG00000162396                                                          |
| 1 | 55258044 | 55258337 | KD2-H4K8ac_peak_1293 | 6.85193  | RP11-67L3.2_ENSG00000237453                                                    |
| 1 | 55276103 | 55276514 | KD2-H4K8ac_peak_1294 | 4.01115  |                                                                                |
| 1 | 55352265 | 55352617 | KD2-H4K8ac_peak_1295 | 5.29555  | DHCR24_ENSG00000116133;RP11-67L3.5_ENSG00000242396;RP11-67L3.4_ENSG00000233203 |
| 1 | 55353162 | 55353709 | KD2-H4K8ac_peak_1296 | 5.01002  | DHCR24_ENSG00000116133;RP11-67L3.5_ENSG00000242396;RP11-67L3.4_ENSG00000233203 |
| 1 | 55415964 | 55416387 | KD2-H4K8ac_peak_1297 | 7.36799  |                                                                                |
| 1 | 55416760 | 55416968 | KD2-H4K8ac_peak_1298 | 5.88845  |                                                                                |
| 1 | 55446253 | 55446656 | KD2-H4K8ac_peak_1299 | 8.59579  | TMEM61_ENSG00000143001                                                         |
| 1 | 55453981 | 55454217 | KD2-H4K8ac_peak_1300 | 4.67342  |                                                                                |
| 1 | 55487974 | 55488324 | KD2-H4K8ac_peak_1301 | 10.05606 |                                                                                |
| 1 | 55514991 | 55515372 | KD2-H4K8ac_peak_1302 | 5.88845  |                                                                                |
| 1 | 55680119 | 55681561 | KD2-H4K8ac_peak_1303 | 18.37277 | USP24_ENSG00000162402                                                          |
| 1 | 55750923 | 55751389 | KD2-H4K8ac_peak_1304 | 10.21502 |                                                                                |
| 1 | 55775828 | 55776261 | KD2-H4K8ac_peak_1305 | 7.38933  |                                                                                |
| 1 | 55777503 | 55777951 | KD2-H4K8ac_peak_1306 | 4.77079  |                                                                                |
| 1 | 55844164 | 55844534 | KD2-H4K8ac_peak_1307 | 5.57044  |                                                                                |
| 1 | 55988162 | 55988377 | KD2-H4K8ac_peak_1308 | 5.04237  |                                                                                |
| 1 | 56020456 | 56021440 | KD2-H4K8ac_peak_1309 | 5.9696   |                                                                                |
| 1 | 56022402 | 56022609 | KD2-H4K8ac_peak_1310 | 6.56926  |                                                                                |
| 1 | 56024179 | 56024676 | KD2-H4K8ac_peak_1311 | 8.30974  |                                                                                |
| 1 | 56106609 | 56106990 | KD2-H4K8ac_peak_1312 | 10.46264 |                                                                                |
| 1 | 56108851 | 56109161 | KD2-H4K8ac_peak_1313 | 4.28372  |                                                                                |
| 1 | 56152145 | 56152739 | KD2-H4K8ac_peak_1314 | 7.27716  |                                                                                |
| 1 | 56156555 | 56157321 | KD2-H4K8ac_peak_1315 | 8.1233   |                                                                                |
| 1 | 56159063 | 56159300 | KD2-H4K8ac_peak_1316 | 5.43522  |                                                                                |
| 1 | 56160324 | 56160574 | KD2-H4K8ac_peak_1317 | 5.14125  |                                                                                |
| 1 | 56161143 | 56161377 | KD2-H4K8ac_peak_1318 | 4.95402  |                                                                                |
| 1 | 56232301 | 56232610 | KD2-H4K8ac_peak_1319 | 6.40683  |                                                                                |
| 1 | 56233074 | 56233694 | KD2-H4K8ac_peak_1320 | 5.20908  |                                                                                |
| 1 | 56234856 | 56235207 | KD2-H4K8ac_peak_1321 | 4.77079  |                                                                                |
| 1 | 56235519 | 56235973 | KD2-H4K8ac_peak_1322 | 5.25071  |                                                                                |
| 1 | 56383345 | 56383602 | KD2-H4K8ac_peak_1323 | 4.37708  |                                                                                |
| 1 | 56404232 | 56404782 | KD2-H4K8ac_peak_1324 | 4.77079  | PIGQP1_ENSG00000227104                                                         |
| 1 | 56559399 | 56559624 | KD2-H4K8ac_peak_1325 | 6.09229  |                                                                                |
| 1 | 56826670 | 56826870 | KD2-H4K8ac_peak_1326 | 9.23578  |                                                                                |
| 1 | 56838966 | 56839298 | KD2-H4K8ac_peak_1327 | 8.1233   |                                                                                |
| 1 | 56841078 | 56841298 | KD2-H4K8ac_peak_1328 | 4.77079  |                                                                                |
| 1 | 56842450 | 56842709 | KD2-H4K8ac_peak_1329 | 7.70289  | AC119674.1_ENSG00000223307                                                     |
| 1 | 56843380 | 56843829 | KD2-H4K8ac_peak_1330 | 9.11031  | AC119674.1_ENSG00000223307                                                     |
| 1 | 56917729 | 56917946 | KD2-H4K8ac_peak_1331 | 5.82799  |                                                                                |
| 1 | 56964232 | 56964570 | KD2-H4K8ac_peak_1332 | 6.25869  |                                                                                |

|   |          |          |                      |          |                                                     |
|---|----------|----------|----------------------|----------|-----------------------------------------------------|
| 1 | 57043277 | 57043536 | KD2-H4K8ac_peak_1333 | 7.27716  |                                                     |
| 1 | 57043800 | 57045299 | KD2-H4K8ac_peak_1334 | 10.05606 |                                                     |
| 1 | 57110363 | 57111277 | KD2-H4K8ac_peak_1335 | 10.72656 | PPAP2B_ENSG00000162407;PRKAA2_ENSG00000162409       |
| 1 | 57285030 | 57285233 | KD2-H4K8ac_peak_1336 | 7.96322  | C1orf168_ENSG00000187889                            |
| 1 | 58373923 | 58374187 | KD2-H4K8ac_peak_1337 | 5.20908  |                                                     |
| 1 | 58898214 | 58898707 | KD2-H4K8ac_peak_1338 | 4.211    |                                                     |
| 1 | 59011806 | 59012183 | KD2-H4K8ac_peak_1339 | 14.42504 | DAB1_ENSG00000173406;OMA1_ENSG00000162600           |
| 1 | 59165474 | 59165682 | KD2-H4K8ac_peak_1340 | 8.4716   | MYSM1_ENSG00000162601                               |
| 1 | 59238801 | 59239192 | KD2-H4K8ac_peak_1341 | 6.40683  |                                                     |
| 1 | 59250072 | 59250515 | KD2-H4K8ac_peak_1342 | 10.44656 | JUN_ENSG00000177606;LINC01135_ENSG00000234807       |
| 1 | 59281037 | 59281233 | KD2-H4K8ac_peak_1343 | 7.70289  |                                                     |
| 1 | 59281802 | 59282431 | KD2-H4K8ac_peak_1344 | 16.32216 |                                                     |
| 1 | 59364656 | 59364925 | KD2-H4K8ac_peak_1345 | 9.10868  |                                                     |
| 1 | 59369298 | 59370148 | KD2-H4K8ac_peak_1346 | 17.8868  |                                                     |
| 1 | 59762711 | 59763440 | KD2-H4K8ac_peak_1347 | 5.86783  | FGGY_ENSG00000172456                                |
| 1 | 59913052 | 59913277 | KD2-H4K8ac_peak_1348 | 7.63551  |                                                     |
| 1 | 60019950 | 60020146 | KD2-H4K8ac_peak_1349 | 4.3289   |                                                     |
| 1 | 60280684 | 60281046 | KD2-H4K8ac_peak_1350 | 8.16906  | HOOK1_ENSG00000134709                               |
| 1 | 60392184 | 60392462 | KD2-H4K8ac_peak_1351 | 10.19949 | CYP2J2_ENSG00000134716                              |
| 1 | 61337680 | 61337883 | KD2-H4K8ac_peak_1352 | 7.12754  |                                                     |
| 1 | 61352772 | 61353004 | KD2-H4K8ac_peak_1353 | 9.34989  |                                                     |
| 1 | 61370283 | 61370540 | KD2-H4K8ac_peak_1354 | 5.57044  |                                                     |
| 1 | 61400801 | 61401081 | KD2-H4K8ac_peak_1355 | 15.88083 |                                                     |
| 1 | 61415453 | 61415688 | KD2-H4K8ac_peak_1356 | 6.79289  |                                                     |
| 1 | 61455497 | 61455715 | KD2-H4K8ac_peak_1357 | 8.00457  |                                                     |
| 1 | 61515926 | 61516774 | KD2-H4K8ac_peak_1358 | 12.00597 |                                                     |
| 1 | 61519759 | 61520084 | KD2-H4K8ac_peak_1359 | 8.30974  |                                                     |
| 1 | 61522546 | 61522759 | KD2-H4K8ac_peak_1360 | 6.14257  |                                                     |
| 1 | 61523339 | 61523538 | KD2-H4K8ac_peak_1361 | 6.99815  |                                                     |
| 1 | 61542345 | 61542649 | KD2-H4K8ac_peak_1362 | 9.1707   |                                                     |
| 1 | 61545236 | 61545493 | KD2-H4K8ac_peak_1363 | 5.90098  |                                                     |
| 1 | 61548794 | 61549562 | KD2-H4K8ac_peak_1364 | 9.36516  | AC096534.1_ENSG00000263380                          |
| 1 | 61828916 | 61829156 | KD2-H4K8ac_peak_1365 | 6.24747  |                                                     |
| 1 | 61919344 | 61919712 | KD2-H4K8ac_peak_1366 | 8.37043  |                                                     |
| 1 | 62190392 | 62191097 | KD2-H4K8ac_peak_1367 | 9.95119  | TM2D1_ENSG00000162604                               |
| 1 | 62191833 | 62192068 | KD2-H4K8ac_peak_1368 | 6.2781   | TM2D1_ENSG00000162604                               |
| 1 | 62207960 | 62208849 | KD2-H4K8ac_peak_1369 | 18.80827 | RP11-430G17.3_ENSG00000271200;INADL_ENSG00000132849 |
| 1 | 62737217 | 62737713 | KD2-H4K8ac_peak_1370 | 7.11824  |                                                     |
| 1 | 62738121 | 62738335 | KD2-H4K8ac_peak_1371 | 6.0073   |                                                     |
| 1 | 62738599 | 62739024 | KD2-H4K8ac_peak_1372 | 6.85193  |                                                     |
| 1 | 62784388 | 62784809 | KD2-H4K8ac_peak_1373 | 12.00273 | KANK4_ENSG00000132854                               |
| 1 | 62792913 | 62793703 | KD2-H4K8ac_peak_1374 | 7.49599  |                                                     |
| 1 | 62850761 | 62851017 | KD2-H4K8ac_peak_1375 | 8.00457  |                                                     |
| 1 | 62902470 | 62903304 | KD2-H4K8ac_peak_1376 | 7.28628  | USP1_ENSG00000162607                                |
| 1 | 63153296 | 63154023 | KD2-H4K8ac_peak_1377 | 12.93209 | DOCK7_ENSG00000116641;RP11-230B22.1_ENSG00000235545 |
| 1 | 63248657 | 63249224 | KD2-H4K8ac_peak_1378 | 8.1233   | ATG4C_ENSG00000125703                               |

|   |          |          |                      |          |                                              |
|---|----------|----------|----------------------|----------|----------------------------------------------|
| 1 | 63249549 | 63249744 | KD2-H4K8ac_peak_1379 | 8.02571  | ATG4C_ENSG00000125703                        |
| 1 | 63832522 | 63833139 | KD2-H4K8ac_peak_1380 | 12.84642 | ALG6_ENSG00000088035                         |
| 1 | 63833362 | 63833758 | KD2-H4K8ac_peak_1381 | 21.75906 | ALG6_ENSG00000088035                         |
| 1 | 64058768 | 64059015 | KD2-H4K8ac_peak_1382 | 6.25869  | ITGB3BP_ENSG00000142856;PGM1_ENSG00000079739 |
| 1 | 64140425 | 64141354 | KD2-H4K8ac_peak_1383 | 11.70505 |                                              |
| 1 | 64239748 | 64239973 | KD2-H4K8ac_peak_1384 | 6.40683  | ROR1_ENSG00000185483                         |
| 1 | 64240458 | 64240736 | KD2-H4K8ac_peak_1385 | 4.211    | ROR1_ENSG00000185483                         |
| 1 | 64283389 | 64283646 | KD2-H4K8ac_peak_1386 | 14.10697 |                                              |
| 1 | 64503866 | 64504121 | KD2-H4K8ac_peak_1387 | 3.92226  |                                              |
| 1 | 64543137 | 64543364 | KD2-H4K8ac_peak_1388 | 8.66387  |                                              |
| 1 | 64575142 | 64575480 | KD2-H4K8ac_peak_1389 | 4.66652  |                                              |
| 1 | 64636758 | 64637321 | KD2-H4K8ac_peak_1390 | 8.55271  | RP11-24J23.2_ENSG00000223949                 |
| 1 | 64637595 | 64637826 | KD2-H4K8ac_peak_1391 | 4.35346  | RP11-24J23.2_ENSG00000223949                 |
| 1 | 64638778 | 64639632 | KD2-H4K8ac_peak_1392 | 9.63776  |                                              |
| 1 | 64653769 | 64654076 | KD2-H4K8ac_peak_1393 | 4.24345  |                                              |
| 1 | 64712306 | 64712743 | KD2-H4K8ac_peak_1394 | 11.15509 |                                              |
| 1 | 64735116 | 64735464 | KD2-H4K8ac_peak_1395 | 4.98318  |                                              |
| 1 | 64747097 | 64747536 | KD2-H4K8ac_peak_1396 | 5.9696   |                                              |
| 1 | 64802202 | 64802889 | KD2-H4K8ac_peak_1397 | 7.79558  |                                              |
| 1 | 64804041 | 64804681 | KD2-H4K8ac_peak_1398 | 7.40633  |                                              |
| 1 | 64935258 | 64935639 | KD2-H4K8ac_peak_1399 | 6.66692  | CACHD1_ENSG00000158966                       |
| 1 | 64935867 | 64936312 | KD2-H4K8ac_peak_1400 | 7.44324  | CACHD1_ENSG00000158966                       |
| 1 | 64971040 | 64971254 | KD2-H4K8ac_peak_1401 | 10.94087 |                                              |
| 1 | 64971601 | 64972013 | KD2-H4K8ac_peak_1402 | 12.82393 |                                              |
| 1 | 65062092 | 65062834 | KD2-H4K8ac_peak_1403 | 5.14125  |                                              |
| 1 | 65066391 | 65066694 | KD2-H4K8ac_peak_1404 | 6.00226  |                                              |
| 1 | 65088801 | 65089060 | KD2-H4K8ac_peak_1405 | 5.75452  |                                              |
| 1 | 65210318 | 65211452 | KD2-H4K8ac_peak_1406 | 11.90231 | RAVER2_ENSG00000162437                       |
| 1 | 65259809 | 65260011 | KD2-H4K8ac_peak_1407 | 5.25071  |                                              |
| 1 | 65341438 | 65341979 | KD2-H4K8ac_peak_1408 | 6.99815  |                                              |
| 1 | 65431597 | 65432136 | KD2-H4K8ac_peak_1409 | 6.40683  | JAK1_ENSG00000162434                         |
| 1 | 65432464 | 65432704 | KD2-H4K8ac_peak_1410 | 6.24747  | JAK1_ENSG00000162434                         |
| 1 | 65532238 | 65533224 | KD2-H4K8ac_peak_1411 | 7.49599  | RP4-535B20.1_ENSG00000231485                 |
| 1 | 65533564 | 65534066 | KD2-H4K8ac_peak_1412 | 17.43705 | RP4-535B20.1_ENSG00000231485                 |
| 1 | 65613611 | 65614769 | KD2-H4K8ac_peak_1413 | 15.59774 | AK4_ENSG00000162433                          |
| 1 | 65731426 | 65731839 | KD2-H4K8ac_peak_1414 | 12.81138 |                                              |
| 1 | 65886414 | 65886784 | KD2-H4K8ac_peak_1415 | 11.80283 | LEPR_ENSG00000116678;LEPROT_ENSG00000213625  |
| 1 | 65991029 | 65991740 | KD2-H4K8ac_peak_1416 | 12.88108 |                                              |
| 1 | 66429025 | 66429217 | KD2-H4K8ac_peak_1417 | 6.40683  |                                              |
| 1 | 66709329 | 66709554 | KD2-H4K8ac_peak_1418 | 4.62507  |                                              |
| 1 | 66737809 | 66738164 | KD2-H4K8ac_peak_1419 | 12.3187  |                                              |
| 1 | 66797836 | 66798138 | KD2-H4K8ac_peak_1420 | 9.11031  |                                              |
| 1 | 66911532 | 66911827 | KD2-H4K8ac_peak_1421 | 6.0073   |                                              |
| 1 | 66916985 | 66917398 | KD2-H4K8ac_peak_1422 | 9.11031  |                                              |
| 1 | 66955682 | 66956109 | KD2-H4K8ac_peak_1423 | 10.21502 |                                              |
| 1 | 66957308 | 66957517 | KD2-H4K8ac_peak_1424 | 5.14125  |                                              |

|   |          |          |                      |          |                                                    |
|---|----------|----------|----------------------|----------|----------------------------------------------------|
| 1 | 66959838 | 66960198 | KD2-H4K8ac_peak_1425 | 6.79289  |                                                    |
| 1 | 66971165 | 66971587 | KD2-H4K8ac_peak_1426 | 4.3015   |                                                    |
| 1 | 66999283 | 66999492 | KD2-H4K8ac_peak_1427 | 5.82799  | SGIP1_ENSG00000118473                              |
| 1 | 67390616 | 67390859 | KD2-H4K8ac_peak_1428 | 10.05606 | WDR78_ENSG00000152763;MIER1_ENSG00000198160        |
| 1 | 67391066 | 67391657 | KD2-H4K8ac_peak_1429 | 8.28994  | WDR78_ENSG00000152763;MIER1_ENSG00000198160        |
| 1 | 67519412 | 67519944 | KD2-H4K8ac_peak_1430 | 9.44322  | SLC35D1_ENSG00000116704                            |
| 1 | 67773294 | 67773978 | KD2-H4K8ac_peak_1431 | 4.86324  | IL12RB2_ENSG00000081985                            |
| 1 | 67895399 | 67896043 | KD2-H4K8ac_peak_1432 | 15.05364 | SERBP1_ENSG00000142864                             |
| 1 | 67896336 | 67896927 | KD2-H4K8ac_peak_1433 | 15.22643 | SERBP1_ENSG00000142864                             |
| 1 | 68074943 | 68075512 | KD2-H4K8ac_peak_1434 | 7.95934  |                                                    |
| 1 | 68140932 | 68141350 | KD2-H4K8ac_peak_1435 | 9.11031  |                                                    |
| 1 | 68142134 | 68142327 | KD2-H4K8ac_peak_1436 | 5.57044  |                                                    |
| 1 | 68150157 | 68150416 | KD2-H4K8ac_peak_1437 | 5.57044  | GADD45A_ENSG00000116717                            |
| 1 | 68151040 | 68152391 | KD2-H4K8ac_peak_1438 | 10.05606 | GADD45A_ENSG00000116717                            |
| 1 | 68232363 | 68232576 | KD2-H4K8ac_peak_1439 | 7.91974  |                                                    |
| 1 | 68298337 | 68298733 | KD2-H4K8ac_peak_1440 | 11.89502 | GNG12_ENSG00000172380;GNG12-AS1_ENSG00000232284    |
| 1 | 68298979 | 68299375 | KD2-H4K8ac_peak_1441 | 5.13615  | GNG12_ENSG00000172380;GNG12-AS1_ENSG00000232284    |
| 1 | 68403592 | 68403834 | KD2-H4K8ac_peak_1442 | 4.37708  |                                                    |
| 1 | 68404787 | 68405520 | KD2-H4K8ac_peak_1443 | 9.59147  |                                                    |
| 1 | 68405923 | 68406184 | KD2-H4K8ac_peak_1444 | 7.27716  |                                                    |
| 1 | 68411296 | 68411603 | KD2-H4K8ac_peak_1445 | 4.35346  |                                                    |
| 1 | 68697796 | 68698160 | KD2-H4K8ac_peak_1446 | 7.47462  | WLS_ENSG00000116729                                |
| 1 | 70671443 | 70671695 | KD2-H4K8ac_peak_1447 | 6.25869  | LRRC40_ENSG00000066557;SRSF11_ENSG00000116754      |
| 1 | 70819913 | 70820844 | KD2-H4K8ac_peak_1448 | 11.89502 | ANKRD13C_ENSG00000118454;HHLA3_ENSG00000197568     |
| 1 | 70948352 | 70948557 | KD2-H4K8ac_peak_1449 | 6.9809   |                                                    |
| 1 | 71546363 | 71546893 | KD2-H4K8ac_peak_1450 | 10.0692  | ZRANB2_ENSG00000132485;ZRANB2-AS2_ENSG00000229956  |
| 1 | 71547450 | 71547741 | KD2-H4K8ac_peak_1451 | 15.7388  | ZRANB2_ENSG00000132485;ZRANB2-AS2_ENSG00000229956  |
| 1 | 72252595 | 72252789 | KD2-H4K8ac_peak_1452 | 5.43522  |                                                    |
| 1 | 72749545 | 72749798 | KD2-H4K8ac_peak_1453 | 6.16888  |                                                    |
| 1 | 75081560 | 75081810 | KD2-H4K8ac_peak_1454 | 4.89656  |                                                    |
| 1 | 75197973 | 75198174 | KD2-H4K8ac_peak_1455 | 8.00457  | CRYZ_ENSG00000116791;TYW3_ENSG00000162623          |
| 1 | 75198928 | 75199253 | KD2-H4K8ac_peak_1456 | 8.94469  | CRYZ_ENSG00000116791;TYW3_ENSG00000162623          |
| 1 | 76081447 | 76081797 | KD2-H4K8ac_peak_1457 | 6.99815  |                                                    |
| 1 | 76082011 | 76082527 | KD2-H4K8ac_peak_1458 | 16.09057 |                                                    |
| 1 | 76190424 | 76190704 | KD2-H4K8ac_peak_1459 | 11.1952  | RP4-682C21.5_ENSG00000178193;ACADM_ENSG00000117054 |
| 1 | 76540029 | 76540266 | KD2-H4K8ac_peak_1460 | 11.30637 | ST6GALNAC3_ENSG00000184005                         |
| 1 | 76745045 | 76745263 | KD2-H4K8ac_peak_1461 | 6.16888  |                                                    |
| 1 | 76803337 | 76803533 | KD2-H4K8ac_peak_1462 | 7.45501  |                                                    |
| 1 | 77230619 | 77231213 | KD2-H4K8ac_peak_1463 | 10.96455 |                                                    |
| 1 | 77333269 | 77334091 | KD2-H4K8ac_peak_1464 | 10.88859 | ST6GALNAC5_ENSG00000117069                         |
| 1 | 77334450 | 77334659 | KD2-H4K8ac_peak_1465 | 5.61067  |                                                    |
| 1 | 77684889 | 77685082 | KD2-H4K8ac_peak_1466 | 10.58496 | PIGK_ENSG00000142892                               |
| 1 | 77747721 | 77747926 | KD2-H4K8ac_peak_1467 | 6.13909  | AK5_ENSG00000154027                                |
| 1 | 78004982 | 78005298 | KD2-H4K8ac_peak_1468 | 6.83936  |                                                    |
| 1 | 78149273 | 78149645 | KD2-H4K8ac_peak_1469 | 7.36799  | ZZZ3_ENSG00000036549                               |
| 1 | 78225099 | 78225406 | KD2-H4K8ac_peak_1470 | 3.82059  | USP33_ENSG00000077254                              |

|   |          |          |                      |          |                                                                                  |
|---|----------|----------|----------------------|----------|----------------------------------------------------------------------------------|
| 1 | 78244504 | 78244991 | KD2-H4K8ac_peak_1471 | 6.40683  | FAM73A_ENSG00000180488;RNA5SP21_ENSG00000222849                                  |
| 1 | 78444274 | 78444581 | KD2-H4K8ac_peak_1472 | 8.4716   | FUBP1_ENSG00000162613;DNAJB4_ENSG00000162616;GIPC2_ENSG00000137960               |
| 1 | 78445552 | 78445756 | KD2-H4K8ac_peak_1473 | 5.25071  | FUBP1_ENSG00000162613;DNAJB4_ENSG00000162616;GIPC2_ENSG00000137960               |
| 1 | 78511736 | 78511940 | KD2-H4K8ac_peak_1474 | 4.8485   |                                                                                  |
| 1 | 81358620 | 81358859 | KD2-H4K8ac_peak_1475 | 5.73839  |                                                                                  |
| 1 | 81697017 | 81697301 | KD2-H4K8ac_peak_1476 | 9.11031  |                                                                                  |
| 1 | 81700102 | 81700300 | KD2-H4K8ac_peak_1477 | 5.25071  |                                                                                  |
| 1 | 81704524 | 81704870 | KD2-H4K8ac_peak_1478 | 6.16888  |                                                                                  |
| 1 | 82266656 | 82266849 | KD2-H4K8ac_peak_1479 | 7.76329  |                                                                                  |
| 1 | 82267216 | 82267498 | KD2-H4K8ac_peak_1480 | 5.38581  |                                                                                  |
| 1 | 82268318 | 82269091 | KD2-H4K8ac_peak_1481 | 8.4716   |                                                                                  |
| 1 | 83981857 | 83982141 | KD2-H4K8ac_peak_1482 | 7.12754  |                                                                                  |
| 1 | 84157814 | 84158225 | KD2-H4K8ac_peak_1483 | 5.20998  |                                                                                  |
| 1 | 84160002 | 84160353 | KD2-H4K8ac_peak_1484 | 7.62364  |                                                                                  |
| 1 | 84162979 | 84163193 | KD2-H4K8ac_peak_1485 | 5.18447  |                                                                                  |
| 1 | 84227673 | 84227902 | KD2-H4K8ac_peak_1486 | 6.16888  |                                                                                  |
| 1 | 84464428 | 84465112 | KD2-H4K8ac_peak_1487 | 17.43705 | TTLL7_ENSG00000137941                                                            |
| 1 | 84543060 | 84543598 | KD2-H4K8ac_peak_1488 | 14.66631 | RP11-486G15.2_ENSG00000271576;PRKACB_ENSG00000142875                             |
| 1 | 84763394 | 84763596 | KD2-H4K8ac_peak_1489 | 5.25071  | SAMD13_ENSG00000203943                                                           |
| 1 | 84764155 | 84764959 | KD2-H4K8ac_peak_1490 | 15.22643 | SAMD13_ENSG00000203943                                                           |
| 1 | 84819112 | 84819326 | KD2-H4K8ac_peak_1491 | 6.66692  |                                                                                  |
| 1 | 84944136 | 84944787 | KD2-H4K8ac_peak_1492 | 11.30637 | RPF1_ENSG00000117133                                                             |
| 1 | 85313405 | 85314129 | KD2-H4K8ac_peak_1493 | 8.30974  |                                                                                  |
| 1 | 85358882 | 85359331 | KD2-H4K8ac_peak_1494 | 6.66692  | LPAR3_ENSG00000171517                                                            |
| 1 | 85741798 | 85742226 | KD2-H4K8ac_peak_1495 | 11.22681 | BCL10_ENSG00000142867;RP11-131L23.1_ENSG00000223653                              |
| 1 | 85930502 | 85931345 | KD2-H4K8ac_peak_1496 | 7.92775  |                                                                                  |
| 1 | 86042006 | 86043108 | KD2-H4K8ac_peak_1497 | 5.01002  | DDAH1_ENSG00000153904                                                            |
| 1 | 86046970 | 86047204 | KD2-H4K8ac_peak_1498 | 8.30974  | CYR61_ENSG00000142871                                                            |
| 1 | 86174231 | 86174895 | KD2-H4K8ac_peak_1499 | 12.84642 | ZNHIT6_ENSG00000117174                                                           |
| 1 | 86861016 | 86861661 | KD2-H4K8ac_peak_1500 | 7.13615  | ODF2L_ENSG00000122417                                                            |
| 1 | 86862320 | 86862540 | KD2-H4K8ac_peak_1501 | 5.14125  | ODF2L_ENSG00000122417                                                            |
| 1 | 86862779 | 86863063 | KD2-H4K8ac_peak_1502 | 6.16888  | ODF2L_ENSG00000122417                                                            |
| 1 | 87170063 | 87170901 | KD2-H4K8ac_peak_1503 | 9.20193  | RP4-612B15.3_ENSG00000261737                                                     |
| 1 | 87259624 | 87259857 | KD2-H4K8ac_peak_1504 | 4.35346  |                                                                                  |
| 1 | 87380417 | 87380763 | KD2-H4K8ac_peak_1505 | 4.67342  | SEP15_ENSG00000183291;HS2ST1_ENSG00000153936                                     |
| 1 | 87793729 | 87794002 | KD2-H4K8ac_peak_1506 | 9.36516  | LMO4_ENSG00000143013                                                             |
| 1 | 87797024 | 87797246 | KD2-H4K8ac_peak_1507 | 5.45396  |                                                                                  |
| 1 | 87800942 | 87801324 | KD2-H4K8ac_peak_1508 | 8.85813  |                                                                                  |
| 1 | 89150008 | 89150704 | KD2-H4K8ac_peak_1509 | 13.70753 | RP11-76N22.2_ENSG00000237505;PKN2_ENSG00000065243                                |
| 1 | 89458035 | 89458290 | KD2-H4K8ac_peak_1510 | 8.4716   | CCBL2_ENSG00000137944;RBMXL1_ENSG00000213516                                     |
| 1 | 89829648 | 89829947 | KD2-H4K8ac_peak_1511 | 4.42765  | GBP6_ENSG00000183347                                                             |
| 1 | 89989444 | 89990269 | KD2-H4K8ac_peak_1512 | 12.84642 | LRR8B_ENSG00000197147                                                            |
| 1 | 90098205 | 90098936 | KD2-H4K8ac_peak_1513 | 8.85813  | RP5-1007M22.2_ENSG00000231999;LRR8C_ENSG00000171488;RP11-302M6.4_ENSG00000271949 |
| 1 | 90166679 | 90166948 | KD2-H4K8ac_peak_1514 | 5.14125  |                                                                                  |
| 1 | 90223516 | 90223776 | KD2-H4K8ac_peak_1515 | 8.26945  |                                                                                  |
| 1 | 90228764 | 90229224 | KD2-H4K8ac_peak_1516 | 6.99815  |                                                                                  |

|   |          |          |                      |          |                                                                           |
|---|----------|----------|----------------------|----------|---------------------------------------------------------------------------|
| 1 | 90286703 | 90286979 | KD2-H4K8ac_peak_1517 | 17.09929 | RP5-943J3.2_ENSG00000272931;LRRC8D_ENSG00000171492                        |
| 1 | 90459853 | 90460194 | KD2-H4K8ac_peak_1518 | 3.75035  | GEMIN8P4_ENSG00000228175;ZNF326_ENSG00000162664                           |
| 1 | 90460755 | 90461268 | KD2-H4K8ac_peak_1519 | 7.36799  | GEMIN8P4_ENSG00000228175;ZNF326_ENSG00000162664                           |
| 1 | 91316348 | 91317000 | KD2-H4K8ac_peak_1520 | 9.31907  | RP4-665J23.1_ENSG00000233593;RP4-665J23.2_ENSG00000225446                 |
| 1 | 91486718 | 91486963 | KD2-H4K8ac_peak_1521 | 6.25869  | ZNF644_ENSG00000122482                                                    |
| 1 | 91487331 | 91488201 | KD2-H4K8ac_peak_1522 | 7.76104  | ZNF644_ENSG00000122482                                                    |
| 1 | 91966442 | 91966912 | KD2-H4K8ac_peak_1523 | 14.48922 | CDC7_ENSG00000097046                                                      |
| 1 | 92495532 | 92495904 | KD2-H4K8ac_peak_1524 | 4.84794  | EPHX4_ENSG00000172031                                                     |
| 1 | 92545909 | 92546377 | KD2-H4K8ac_peak_1525 | 7.07117  | BTBD8_ENSG00000189195                                                     |
| 1 | 92764666 | 92764997 | KD2-H4K8ac_peak_1526 | 5.20998  | RPAP2_ENSG00000122484                                                     |
| 1 | 93250900 | 93251537 | KD2-H4K8ac_peak_1527 | 9.11031  |                                                                           |
| 1 | 93426472 | 93426704 | KD2-H4K8ac_peak_1528 | 9.1707   | FAM69A_ENSG00000154511                                                    |
| 1 | 93427455 | 93427725 | KD2-H4K8ac_peak_1529 | 8.55271  | FAM69A_ENSG00000154511                                                    |
| 1 | 93544443 | 93544635 | KD2-H4K8ac_peak_1530 | 10.72656 | MTF2_ENSG00000143033                                                      |
| 1 | 93544910 | 93545127 | KD2-H4K8ac_peak_1531 | 10.63441 | MTF2_ENSG00000143033                                                      |
| 1 | 93645509 | 93645841 | KD2-H4K8ac_peak_1532 | 10.7186  | TMED5_ENSG00000117500;CCDC18_ENSG00000122483                              |
| 1 | 93811001 | 93812096 | KD2-H4K8ac_peak_1533 | 7.36799  | RP4-717I23.3_ENSG00000223745;DR1_ENSG00000117505                          |
| 1 | 93913257 | 93915041 | KD2-H4K8ac_peak_1534 | 16.32216 | FNBP1L_ENSG00000137942                                                    |
| 1 | 94041012 | 94041259 | KD2-H4K8ac_peak_1535 | 3.82059  |                                                                           |
| 1 | 94043257 | 94043827 | KD2-H4K8ac_peak_1536 | 8.55271  |                                                                           |
| 1 | 94044622 | 94044815 | KD2-H4K8ac_peak_1537 | 8.59579  |                                                                           |
| 1 | 94055412 | 94055663 | KD2-H4K8ac_peak_1538 | 3.91903  |                                                                           |
| 1 | 94075055 | 94075785 | KD2-H4K8ac_peak_1539 | 9.70057  |                                                                           |
| 1 | 94079396 | 94079592 | KD2-H4K8ac_peak_1540 | 10.21366 |                                                                           |
| 1 | 94080892 | 94081444 | KD2-H4K8ac_peak_1541 | 6.66692  |                                                                           |
| 1 | 94082405 | 94082631 | KD2-H4K8ac_peak_1542 | 5.9696   |                                                                           |
| 1 | 94082850 | 94083082 | KD2-H4K8ac_peak_1543 | 7.81657  |                                                                           |
| 1 | 94083579 | 94083824 | KD2-H4K8ac_peak_1544 | 5.82799  |                                                                           |
| 1 | 94086239 | 94086526 | KD2-H4K8ac_peak_1545 | 4.12757  |                                                                           |
| 1 | 94092212 | 94092457 | KD2-H4K8ac_peak_1546 | 5.25071  |                                                                           |
| 1 | 94146663 | 94147058 | KD2-H4K8ac_peak_1547 | 5.14125  |                                                                           |
| 1 | 94147420 | 94147647 | KD2-H4K8ac_peak_1548 | 7.81657  |                                                                           |
| 1 | 94174434 | 94174780 | KD2-H4K8ac_peak_1549 | 5.88845  |                                                                           |
| 1 | 94205833 | 94206096 | KD2-H4K8ac_peak_1550 | 7.69287  |                                                                           |
| 1 | 94293434 | 94293718 | KD2-H4K8ac_peak_1551 | 9.90914  |                                                                           |
| 1 | 94293995 | 94294586 | KD2-H4K8ac_peak_1552 | 9.31907  |                                                                           |
| 1 | 94311184 | 94311419 | KD2-H4K8ac_peak_1553 | 6.45018  | MIR760_ENSG00000211575                                                    |
| 1 | 94312036 | 94312411 | KD2-H4K8ac_peak_1554 | 11.86082 | BCAR3_ENSG00000137936;MIR760_ENSG00000211575;RP4-561L24.3_ENSG00000260464 |
| 1 | 94313374 | 94313613 | KD2-H4K8ac_peak_1555 | 6.25869  | BCAR3_ENSG00000137936;MIR760_ENSG00000211575;RP4-561L24.3_ENSG00000260464 |
| 1 | 94345457 | 94345945 | KD2-H4K8ac_peak_1556 | 13.39763 | DNTTIP2_ENSG00000067334                                                   |
| 1 | 94374555 | 94374864 | KD2-H4K8ac_peak_1557 | 5.9696   | GCLM_ENSG00000023909                                                      |
| 1 | 94509867 | 94510122 | KD2-H4K8ac_peak_1558 | 8.59301  |                                                                           |
| 1 | 94510321 | 94510589 | KD2-H4K8ac_peak_1559 | 8.30974  |                                                                           |
| 1 | 94566894 | 94567272 | KD2-H4K8ac_peak_1560 | 9.96798  |                                                                           |
| 1 | 94582905 | 94583492 | KD2-H4K8ac_peak_1561 | 7.27716  |                                                                           |
| 1 | 94712869 | 94713237 | KD2-H4K8ac_peak_1562 | 4.211    | RP11-148B18.1_ENSG00000231363                                             |

|   |          |          |                      |          |                                                     |
|---|----------|----------|----------------------|----------|-----------------------------------------------------|
| 1 | 94746774 | 94746989 | KD2-H4K8ac_peak_1563 | 4.65111  |                                                     |
| 1 | 94786643 | 94786857 | KD2-H4K8ac_peak_1564 | 4.9025   |                                                     |
| 1 | 94884018 | 94884244 | KD2-H4K8ac_peak_1565 | 8.79106  | ABCD3_ENSG00000117528                               |
| 1 | 95006927 | 95008022 | KD2-H4K8ac_peak_1566 | 13.81781 | F3_ENSG00000117525                                  |
| 1 | 95220803 | 95221097 | KD2-H4K8ac_peak_1567 | 12.46946 |                                                     |
| 1 | 95222301 | 95222601 | KD2-H4K8ac_peak_1568 | 8.10216  |                                                     |
| 1 | 95223499 | 95223770 | KD2-H4K8ac_peak_1569 | 7.22457  |                                                     |
| 1 | 95285414 | 95286274 | KD2-H4K8ac_peak_1570 | 10.05606 | LINC01057_ENSG00000224081;SLC44A3_ENSG00000143036   |
| 1 | 95320723 | 95321060 | KD2-H4K8ac_peak_1571 | 4.77079  | RP11-465K1.2_ENSG00000237416                        |
| 1 | 95350136 | 95350332 | KD2-H4K8ac_peak_1572 | 6.13909  |                                                     |
| 1 | 95391818 | 95392560 | KD2-H4K8ac_peak_1573 | 6.80488  | CNN3_ENSG00000117519;RP4-639F20.1_ENSG00000235501   |
| 1 | 95392882 | 95393331 | KD2-H4K8ac_peak_1574 | 15.76765 | CNN3_ENSG00000117519;RP4-639F20.1_ENSG00000235501   |
| 1 | 95413748 | 95413981 | KD2-H4K8ac_peak_1575 | 7.83656  |                                                     |
| 1 | 95414821 | 95415188 | KD2-H4K8ac_peak_1576 | 5.93446  |                                                     |
| 1 | 95418076 | 95418356 | KD2-H4K8ac_peak_1577 | 7.59643  |                                                     |
| 1 | 95421305 | 95421509 | KD2-H4K8ac_peak_1578 | 5.57044  |                                                     |
| 1 | 95582897 | 95583465 | KD2-H4K8ac_peak_1579 | 6.84261  | TMEM56_ENSG00000152078;TMEM56-RWDD3_ENSG00000271092 |
| 1 | 95699221 | 95699591 | KD2-H4K8ac_peak_1580 | 10.17341 | RP11-57H12.3_ENSG00000226026;RWDD3_ENSG00000122481  |
| 1 | 95776695 | 95777188 | KD2-H4K8ac_peak_1581 | 5.15777  |                                                     |
| 1 | 95789874 | 95790169 | KD2-H4K8ac_peak_1582 | 7.12754  |                                                     |
| 1 | 95790399 | 95790962 | KD2-H4K8ac_peak_1583 | 7.12754  |                                                     |
| 1 | 95791838 | 95792090 | KD2-H4K8ac_peak_1584 | 6.07178  |                                                     |
| 1 | 95846585 | 95846800 | KD2-H4K8ac_peak_1585 | 8.41122  | RP11-14O19.2_ENSG00000237954                        |
| 1 | 96038199 | 96038470 | KD2-H4K8ac_peak_1586 | 4.44748  |                                                     |
| 1 | 96041535 | 96041831 | KD2-H4K8ac_peak_1587 | 4.59928  |                                                     |
| 1 | 96069408 | 96069688 | KD2-H4K8ac_peak_1588 | 5.57044  |                                                     |
| 1 | 96071567 | 96071965 | KD2-H4K8ac_peak_1589 | 7.27716  |                                                     |
| 1 | 96108112 | 96108720 | KD2-H4K8ac_peak_1590 | 5.71749  |                                                     |
| 1 | 96119158 | 96119351 | KD2-H4K8ac_peak_1591 | 4.42765  |                                                     |
| 1 | 96120944 | 96121352 | KD2-H4K8ac_peak_1592 | 6.40683  |                                                     |
| 1 | 96371029 | 96371258 | KD2-H4K8ac_peak_1593 | 7.47462  |                                                     |
| 1 | 96416916 | 96417155 | KD2-H4K8ac_peak_1594 | 8.00457  |                                                     |
| 1 | 96449228 | 96449439 | KD2-H4K8ac_peak_1595 | 4.37708  |                                                     |
| 1 | 96451020 | 96451413 | KD2-H4K8ac_peak_1596 | 10.21502 |                                                     |
| 1 | 96526387 | 96526649 | KD2-H4K8ac_peak_1597 | 7.12754  |                                                     |
| 1 | 97186699 | 97186953 | KD2-H4K8ac_peak_1598 | 4.20044  | PTBP2_ENSG00000117569                               |
| 1 | 97187367 | 97187994 | KD2-H4K8ac_peak_1599 | 11.66477 | PTBP2_ENSG00000117569                               |
| 1 | 97432536 | 97432769 | KD2-H4K8ac_peak_1600 | 4.77079  |                                                     |
| 1 | 97434263 | 97434459 | KD2-H4K8ac_peak_1601 | 8.74596  |                                                     |
| 1 | 97462823 | 97463279 | KD2-H4K8ac_peak_1602 | 9.02371  |                                                     |
| 1 | 97464281 | 97464680 | KD2-H4K8ac_peak_1603 | 20.88898 |                                                     |
| 1 | 98514886 | 98515136 | KD2-H4K8ac_peak_1604 | 5.54647  | MIR137HG_ENSG00000225206                            |
| 1 | 98518961 | 98520777 | KD2-H4K8ac_peak_1605 | 15.58442 |                                                     |
| 1 | 98920285 | 98920534 | KD2-H4K8ac_peak_1606 | 6.64891  |                                                     |
| 1 | 99126857 | 99127668 | KD2-H4K8ac_peak_1607 | 11.89502 | SNX7_ENSG00000162627                                |
| 1 | 99388319 | 99388526 | KD2-H4K8ac_peak_1608 | 10.21502 |                                                     |

|   |           |          |                      |          |                                                                            |
|---|-----------|----------|----------------------|----------|----------------------------------------------------------------------------|
| 1 | 99389949  | 99390204 | KD2-H4K8ac_peak_1609 | 10.21502 |                                                                            |
| 1 | 99469550  | 99470423 | KD2-H4K8ac_peak_1610 | 15.9336  | LPPR5_ENSG00000117598;RP5-896L10.1_ENSG00000232825                         |
| 1 | 100111376 | 1E+08    | KD2-H4K8ac_peak_1611 | 5.57044  | PALMD_ENSG00000099260                                                      |
| 1 | 100314992 | 1E+08    | KD2-H4K8ac_peak_1612 | 7.57336  |                                                                            |
| 1 | 100409388 | 1E+08    | KD2-H4K8ac_peak_1613 | 7.22457  |                                                                            |
| 1 | 100434983 | 1E+08    | KD2-H4K8ac_peak_1614 | 8.55271  | RP5-884G6.2_ENSG00000228084;SLC35A3_ENSG00000117620                        |
| 1 | 100435650 | 1E+08    | KD2-H4K8ac_peak_1615 | 6.40297  | RP5-884G6.2_ENSG00000228084;SLC35A3_ENSG00000117620                        |
| 1 | 100503746 | 1.01E+08 | KD2-H4K8ac_peak_1616 | 5.98692  | HIAT1_ENSG00000156875                                                      |
| 1 | 100598140 | 1.01E+08 | KD2-H4K8ac_peak_1617 | 6.20982  | SASS6_ENSG00000156876;TRMT13_ENSG00000122435                               |
| 1 | 100714965 | 1.01E+08 | KD2-H4K8ac_peak_1618 | 11.30637 | DBT_ENSG00000137992;RP11-305E17.4_ENSG00000230287                          |
| 1 | 100715577 | 1.01E+08 | KD2-H4K8ac_peak_1619 | 6.16888  | DBT_ENSG00000137992;RP11-305E17.4_ENSG00000230287                          |
| 1 | 100731835 | 1.01E+08 | KD2-H4K8ac_peak_1620 | 11.43863 | RP11-305E17.6_ENSG00000224616;RTCA_ENSG00000137996                         |
| 1 | 100816586 | 1.01E+08 | KD2-H4K8ac_peak_1621 | 6.04107  |                                                                            |
| 1 | 101360575 | 1.01E+08 | KD2-H4K8ac_peak_1622 | 8.30974  | EXTL2_ENSG00000162694;RP4-549L20.3_ENSG00000273204;SLC30A7_ENSG00000162695 |
| 1 | 101361745 | 1.01E+08 | KD2-H4K8ac_peak_1623 | 5.14125  | EXTL2_ENSG00000162694;SLC30A7_ENSG00000162695                              |
| 1 | 101491467 | 1.01E+08 | KD2-H4K8ac_peak_1624 | 5.14125  | DPH5_ENSG00000117543;RP11-421L21.3_ENSG00000233184                         |
| 1 | 103574360 | 1.04E+08 | KD2-H4K8ac_peak_1625 | 4.42765  | COL11A1_ENSG00000060718                                                    |
| 1 | 105680687 | 1.06E+08 | KD2-H4K8ac_peak_1626 | 11.03331 |                                                                            |
| 1 | 107598853 | 1.08E+08 | KD2-H4K8ac_peak_1627 | 24.42768 | PRMT6_ENSG00000198890                                                      |
| 1 | 107600260 | 1.08E+08 | KD2-H4K8ac_peak_1628 | 4.8485   | PRMT6_ENSG00000198890                                                      |
| 1 | 107682649 | 1.08E+08 | KD2-H4K8ac_peak_1629 | 6.83936  | NTNG1_ENSG00000162631                                                      |
| 1 | 108507153 | 1.09E+08 | KD2-H4K8ac_peak_1630 | 10.2048  | VAV3_ENSG00000134215;VAV3-AS1_ENSG00000230489                              |
| 1 | 108507913 | 1.09E+08 | KD2-H4K8ac_peak_1631 | 8.55271  | VAV3_ENSG00000134215;VAV3-AS1_ENSG00000230489                              |
| 1 | 108742275 | 1.09E+08 | KD2-H4K8ac_peak_1632 | 11.05467 | SLC25A24_ENSG00000085491;RP11-483I13.5_ENSG00000260879                     |
| 1 | 108743088 | 1.09E+08 | KD2-H4K8ac_peak_1633 | 11.24702 | SLC25A24_ENSG00000085491;RP11-483I13.5_ENSG00000260879                     |
| 1 | 109234458 | 1.09E+08 | KD2-H4K8ac_peak_1634 | 8.5092   | PRPF38B_ENSG00000134186                                                    |
| 1 | 109288840 | 1.09E+08 | KD2-H4K8ac_peak_1635 | 7.47462  | STXBP3_ENSG00000116266                                                     |
| 1 | 109289348 | 1.09E+08 | KD2-H4K8ac_peak_1636 | 7.47462  | STXBP3_ENSG00000116266                                                     |
| 1 | 109358104 | 1.09E+08 | KD2-H4K8ac_peak_1637 | 6.16888  |                                                                            |
| 1 | 109359134 | 1.09E+08 | KD2-H4K8ac_peak_1638 | 7.27716  |                                                                            |
| 1 | 109360288 | 1.09E+08 | KD2-H4K8ac_peak_1639 | 6.94255  |                                                                            |
| 1 | 109372794 | 1.09E+08 | KD2-H4K8ac_peak_1640 | 6.0605   |                                                                            |
| 1 | 109506335 | 1.1E+08  | KD2-H4K8ac_peak_1641 | 6.8836   | AKNAD1_ENSG00000162641;CLCC1_ENSG00000121940                               |
| 1 | 109619178 | 1.1E+08  | KD2-H4K8ac_peak_1642 | 9.06703  | TAF13_ENSG00000197780                                                      |
| 1 | 109642861 | 1.1E+08  | KD2-H4K8ac_peak_1643 | 6.40297  | SCARNA2_ENSG00000270066                                                    |
| 1 | 109756656 | 1.1E+08  | KD2-H4K8ac_peak_1644 | 4.98072  | SARS_ENSG00000031698                                                       |
| 1 | 109791585 | 1.1E+08  | KD2-H4K8ac_peak_1645 | 5.75757  | CELSR2_ENSG00000143126                                                     |
| 1 | 109792383 | 1.1E+08  | KD2-H4K8ac_peak_1646 | 5.32397  | CELSR2_ENSG00000143126                                                     |
| 1 | 109795957 | 1.1E+08  | KD2-H4K8ac_peak_1647 | 9.6589   |                                                                            |
| 1 | 109825475 | 1.1E+08  | KD2-H4K8ac_peak_1648 | 5.59859  | PSRC1_ENSG00000134222                                                      |
| 1 | 109825999 | 1.1E+08  | KD2-H4K8ac_peak_1649 | 6.67538  | PSRC1_ENSG00000134222                                                      |
| 1 | 109940059 | 1.1E+08  | KD2-H4K8ac_peak_1650 | 11.05407 | SORT1_ENSG00000134243                                                      |
| 1 | 109968726 | 1.1E+08  | KD2-H4K8ac_peak_1651 | 4.06758  | PSMA5_ENSG00000143106                                                      |
| 1 | 110025855 | 1.1E+08  | KD2-H4K8ac_peak_1652 | 9.11031  | ATXN7L2_ENSG00000162650                                                    |
| 1 | 110026607 | 1.1E+08  | KD2-H4K8ac_peak_1653 | 23.27293 | ATXN7L2_ENSG00000162650                                                    |
| 1 | 110036398 | 1.1E+08  | KD2-H4K8ac_peak_1654 | 5.13615  | CYB561D1_ENSG00000174151                                                   |



|   |           |         |                      |          |                                                    |
|---|-----------|---------|----------------------|----------|----------------------------------------------------|
| 1 | 110051829 | 1.1E+08 | KD2-H4K8ac_peak_1655 | 8.55271  | AMIGO1_ENSG00000181754                             |
| 1 | 110072482 | 1.1E+08 | KD2-H4K8ac_peak_1656 | 5.82799  |                                                    |
| 1 | 110073388 | 1.1E+08 | KD2-H4K8ac_peak_1657 | 6.60096  |                                                    |
| 1 | 110074786 | 1.1E+08 | KD2-H4K8ac_peak_1658 | 18.82114 |                                                    |
| 1 | 110089349 | 1.1E+08 | KD2-H4K8ac_peak_1659 | 5.61067  |                                                    |
| 1 | 110090633 | 1.1E+08 | KD2-H4K8ac_peak_1660 | 6.99815  | GNAI3_ENSG00000065135                              |
| 1 | 110161160 | 1.1E+08 | KD2-H4K8ac_peak_1661 | 7.22457  |                                                    |
| 1 | 110173943 | 1.1E+08 | KD2-H4K8ac_peak_1662 | 9.63487  |                                                    |
| 1 | 110174680 | 1.1E+08 | KD2-H4K8ac_peak_1663 | 7.86151  |                                                    |
| 1 | 110175528 | 1.1E+08 | KD2-H4K8ac_peak_1664 | 10.98959 |                                                    |
| 1 | 110198694 | 1.1E+08 | KD2-H4K8ac_peak_1665 | 7.49599  | GSTM4_ENSG00000168765                              |
| 1 | 110211013 | 1.1E+08 | KD2-H4K8ac_peak_1666 | 8.17902  | GSTM2_ENSG00000213366                              |
| 1 | 110282307 | 1.1E+08 | KD2-H4K8ac_peak_1667 | 3.90565  |                                                    |
| 1 | 110283055 | 1.1E+08 | KD2-H4K8ac_peak_1668 | 7.44324  | GSTM3_ENSG00000134202                              |
| 1 | 110453509 | 1.1E+08 | KD2-H4K8ac_peak_1669 | 8.94469  | CSF1_ENSG00000184371                               |
| 1 | 110526624 | 1.1E+08 | KD2-H4K8ac_peak_1670 | 5.9696   | AHCYL1_ENSG00000168710                             |
| 1 | 110527448 | 1.1E+08 | KD2-H4K8ac_peak_1671 | 15.039   | AHCYL1_ENSG00000168710                             |
| 1 | 110577292 | 1.1E+08 | KD2-H4K8ac_peak_1672 | 20.5798  |                                                    |
| 1 | 110593087 | 1.1E+08 | KD2-H4K8ac_peak_1673 | 5.14125  |                                                    |
| 1 | 110601453 | 1.1E+08 | KD2-H4K8ac_peak_1674 | 7.67504  | RP4-773N10.4_ENSG00000258634                       |
| 1 | 110602228 | 1.1E+08 | KD2-H4K8ac_peak_1675 | 14.69247 |                                                    |
| 1 | 110602756 | 1.1E+08 | KD2-H4K8ac_peak_1676 | 7.47462  |                                                    |
| 1 | 110605600 | 1.1E+08 | KD2-H4K8ac_peak_1677 | 4.42765  |                                                    |
| 1 | 110637323 | 1.1E+08 | KD2-H4K8ac_peak_1678 | 6.20982  |                                                    |
| 1 | 110640855 | 1.1E+08 | KD2-H4K8ac_peak_1679 | 7.06358  |                                                    |
| 1 | 110649128 | 1.1E+08 | KD2-H4K8ac_peak_1680 | 12.00273 |                                                    |
| 1 | 110714476 | 1.1E+08 | KD2-H4K8ac_peak_1681 | 8.55271  | RP5-1028L10.1_ENSG00000227091                      |
| 1 | 110752311 | 1.1E+08 | KD2-H4K8ac_peak_1682 | 7.27716  | KCNC4-AS1_ENSG00000224965                          |
| 1 | 110753334 | 1.1E+08 | KD2-H4K8ac_peak_1683 | 6.97919  | KCNC4-AS1_ENSG00000224965;KCNC4_ENSG00000116396    |
| 1 | 110778094 | 1.1E+08 | KD2-H4K8ac_peak_1684 | 10.43145 |                                                    |
| 1 | 110880932 | 1.1E+08 | KD2-H4K8ac_peak_1685 | 6.8713   | RP5-1074L1.1_ENSG00000227963;RBM15_ENSG00000162775 |
| 1 | 110882097 | 1.1E+08 | KD2-H4K8ac_peak_1686 | 14.27912 | RP5-1074L1.1_ENSG00000227963;RBM15_ENSG00000162775 |
| 1 | 110949621 | 1.1E+08 | KD2-H4K8ac_peak_1687 | 11.03331 | LAMTOR5_ENSG00000134248                            |
| 1 | 111505851 | 1.1E+08 | KD2-H4K8ac_peak_1688 | 7.76329  | LRIF1_ENSG00000121931;RP11-96K19.5_ENSG00000273010 |
| 1 | 111682446 | 1.1E+08 | KD2-H4K8ac_peak_1689 | 9.36516  | DRAM2_ENSG00000156171;CEPT1_ENSG00000134255        |
| 1 | 111682932 | 1.1E+08 | KD2-H4K8ac_peak_1690 | 9.08816  | DRAM2_ENSG00000156171;CEPT1_ENSG00000134255        |
| 1 | 111888977 | 1.1E+08 | KD2-H4K8ac_peak_1691 | 9.95119  | PIFO_ENSG00000173947                               |
| 1 | 111992143 | 1.1E+08 | KD2-H4K8ac_peak_1692 | 12.42547 | WDR77_ENSG00000116455;ATP5F1_ENSG00000116459       |
| 1 | 112050597 | 1.1E+08 | KD2-H4K8ac_peak_1693 | 8.10216  |                                                    |
| 1 | 112281215 | 1.1E+08 | KD2-H4K8ac_peak_1694 | 9.08816  | FAM212B-AS1_ENSG00000227811                        |
| 1 | 112282751 | 1.1E+08 | KD2-H4K8ac_peak_1695 | 12.42761 | FAM212B-AS1_ENSG00000227811                        |
| 1 | 112298310 | 1.1E+08 | KD2-H4K8ac_peak_1696 | 7.36799  | FAM212B_ENSG00000197852;DDX20_ENSG00000064703      |
| 1 | 112438261 | 1.1E+08 | KD2-H4K8ac_peak_1697 | 11.70505 |                                                    |
| 1 | 112933720 | 1.1E+08 | KD2-H4K8ac_peak_1698 | 9.63487  |                                                    |
| 1 | 112938002 | 1.1E+08 | KD2-H4K8ac_peak_1699 | 10.30284 | CTTNBP2NL_ENSG00000143079                          |
| 1 | 112938837 | 1.1E+08 | KD2-H4K8ac_peak_1700 | 16.61426 | CTTNBP2NL_ENSG00000143079                          |

|   |           |          |                      |          |                                                           |
|---|-----------|----------|----------------------|----------|-----------------------------------------------------------|
| 1 | 113051401 | 1.13E+08 | KD2-H4K8ac_peak_1701 | 5.29555  |                                                           |
| 1 | 113161446 | 1.13E+08 | KD2-H4K8ac_peak_1702 | 17.42214 | CAPZA1_ENSG00000116489                                    |
| 1 | 113162493 | 1.13E+08 | KD2-H4K8ac_peak_1703 | 10.30284 | CAPZA1_ENSG00000116489;ST7L_ENSG00000007341               |
| 1 | 113217051 | 1.13E+08 | KD2-H4K8ac_peak_1704 | 5.75757  |                                                           |
| 1 | 113218023 | 1.13E+08 | KD2-H4K8ac_peak_1705 | 7.76329  |                                                           |
| 1 | 113249320 | 1.13E+08 | KD2-H4K8ac_peak_1706 | 9.1707   | RHOC_ENSG00000155366                                      |
| 1 | 113392182 | 1.13E+08 | KD2-H4K8ac_peak_1707 | 10.7186  | RP3-522D1.1_ENSG00000224167;RP11-426L16.8_ENSG00000215866 |
| 1 | 113499083 | 1.13E+08 | KD2-H4K8ac_peak_1708 | 4.67342  | SLC16A1_ENSG00000155380;SLC16A1-AS1_ENSG00000226419       |
| 1 | 113615880 | 1.14E+08 | KD2-H4K8ac_peak_1709 | 8.82366  | RP11-31F15.2_ENSG00000238198;LRIG2_ENSG00000198799        |
| 1 | 113683472 | 1.14E+08 | KD2-H4K8ac_peak_1710 | 9.20193  |                                                           |
| 1 | 113688154 | 1.14E+08 | KD2-H4K8ac_peak_1711 | 6.66359  |                                                           |
| 1 | 113690501 | 1.14E+08 | KD2-H4K8ac_peak_1712 | 13.81781 |                                                           |
| 1 | 113691945 | 1.14E+08 | KD2-H4K8ac_peak_1713 | 5.54647  |                                                           |
| 1 | 113696233 | 1.14E+08 | KD2-H4K8ac_peak_1714 | 4.16871  |                                                           |
| 1 | 113766651 | 1.14E+08 | KD2-H4K8ac_peak_1715 | 4.12757  |                                                           |
| 1 | 113825621 | 1.14E+08 | KD2-H4K8ac_peak_1716 | 6.66692  |                                                           |
| 1 | 113933167 | 1.14E+08 | KD2-H4K8ac_peak_1717 | 11.05467 | MAGI3_ENSG00000081026                                     |
| 1 | 114301709 | 1.14E+08 | KD2-H4K8ac_peak_1718 | 12.23    | PHTF1_ENSG00000116793                                     |
| 1 | 114354382 | 1.14E+08 | KD2-H4K8ac_peak_1719 | 12.84642 | RSBN1_ENSG00000081019;RP5-1073O3.2_ENSG00000231128        |
| 1 | 114356016 | 1.14E+08 | KD2-H4K8ac_peak_1720 | 12.03366 | RSBN1_ENSG00000081019                                     |
| 1 | 114447270 | 1.14E+08 | KD2-H4K8ac_peak_1721 | 3.97079  | AP4B1_ENSG00000134262;DCLRE1B_ENSG00000118655             |
| 1 | 114448082 | 1.14E+08 | KD2-H4K8ac_peak_1722 | 5.38581  | AP4B1_ENSG00000134262;DCLRE1B_ENSG00000118655             |
| 1 | 114471550 | 1.14E+08 | KD2-H4K8ac_peak_1723 | 6.66692  | RP5-1073O3.7_ENSG00000235527;HIPK1_ENSG00000163349        |
| 1 | 114472459 | 1.14E+08 | KD2-H4K8ac_peak_1724 | 6.40683  | RP5-1073O3.7_ENSG00000235527;HIPK1_ENSG00000163349        |
| 1 | 114521644 | 1.15E+08 | KD2-H4K8ac_peak_1725 | 6.54442  | OLFML3_ENSG00000116774                                    |
| 1 | 114888574 | 1.15E+08 | KD2-H4K8ac_peak_1726 | 14.06758 |                                                           |
| 1 | 115053159 | 1.15E+08 | KD2-H4K8ac_peak_1727 | 6.40874  | TRIM33_ENSG00000197323                                    |
| 1 | 115054032 | 1.15E+08 | KD2-H4K8ac_peak_1728 | 9.6589   | TRIM33_ENSG00000197323                                    |
| 1 | 115124496 | 1.15E+08 | KD2-H4K8ac_peak_1729 | 17.83665 | BCAS2_ENSG00000116752                                     |
| 1 | 115258658 | 1.15E+08 | KD2-H4K8ac_peak_1730 | 5.88845  | NRAS_ENSG00000213281                                      |
| 1 | 115300276 | 1.15E+08 | KD2-H4K8ac_peak_1731 | 27.58135 | CSDE1_ENSG00000009307                                     |
| 1 | 115300857 | 1.15E+08 | KD2-H4K8ac_peak_1732 | 8.1233   | CSDE1_ENSG00000009307                                     |
| 1 | 115322960 | 1.15E+08 | KD2-H4K8ac_peak_1733 | 4.37809  | SIKE1_ENSG00000052723                                     |
| 1 | 115681830 | 1.16E+08 | KD2-H4K8ac_peak_1734 | 6.15357  |                                                           |
| 1 | 115845264 | 1.16E+08 | KD2-H4K8ac_peak_1735 | 11.30637 |                                                           |
| 1 | 115860233 | 1.16E+08 | KD2-H4K8ac_peak_1736 | 5.57044  |                                                           |
| 1 | 115860981 | 1.16E+08 | KD2-H4K8ac_peak_1737 | 9.1707   |                                                           |
| 1 | 115880103 | 1.16E+08 | KD2-H4K8ac_peak_1738 | 7.76329  | NGF_ENSG00000134259                                       |
| 1 | 116135185 | 1.16E+08 | KD2-H4K8ac_peak_1739 | 4.37708  |                                                           |
| 1 | 116184644 | 1.16E+08 | KD2-H4K8ac_peak_1740 | 8.53092  |                                                           |
| 1 | 116370964 | 1.16E+08 | KD2-H4K8ac_peak_1741 | 7.69287  |                                                           |
| 1 | 116371912 | 1.16E+08 | KD2-H4K8ac_peak_1742 | 5.14125  |                                                           |
| 1 | 116473290 | 1.16E+08 | KD2-H4K8ac_peak_1743 | 6.86699  |                                                           |
| 1 | 116518589 | 1.17E+08 | KD2-H4K8ac_peak_1744 | 11.24702 | SLC22A15_ENSG00000163393                                  |
| 1 | 116694357 | 1.17E+08 | KD2-H4K8ac_peak_1745 | 4.54006  |                                                           |
| 1 | 116694967 | 1.17E+08 | KD2-H4K8ac_peak_1746 | 4.30033  |                                                           |

|   |           |          |                      |          |                                                        |
|---|-----------|----------|----------------------|----------|--------------------------------------------------------|
| 1 | 116915392 | 1.17E+08 | KD2-H4K8ac_peak_1747 | 7.50083  | ATP1A1_ENSG00000163399                                 |
| 1 | 116960977 | 1.17E+08 | KD2-H4K8ac_peak_1748 | 11.09936 | ATP1A1OS_ENSG00000203865                               |
| 1 | 116961948 | 1.17E+08 | KD2-H4K8ac_peak_1749 | 7.96194  | ATP1A1OS_ENSG00000203865                               |
| 1 | 117027533 | 1.17E+08 | KD2-H4K8ac_peak_1750 | 10.77651 |                                                        |
| 1 | 117113905 | 1.17E+08 | KD2-H4K8ac_peak_1751 | 8.10216  | CD58_ENSG00000116815                                   |
| 1 | 117189358 | 1.17E+08 | KD2-H4K8ac_peak_1752 | 5.28072  |                                                        |
| 1 | 117222356 | 1.17E+08 | KD2-H4K8ac_peak_1753 | 6.0073   |                                                        |
| 1 | 117228073 | 1.17E+08 | KD2-H4K8ac_peak_1754 | 9.06703  |                                                        |
| 1 | 117230589 | 1.17E+08 | KD2-H4K8ac_peak_1755 | 10.05606 |                                                        |
| 1 | 117231743 | 1.17E+08 | KD2-H4K8ac_peak_1756 | 6.30229  |                                                        |
| 1 | 117233980 | 1.17E+08 | KD2-H4K8ac_peak_1757 | 9.44423  |                                                        |
| 1 | 117235894 | 1.17E+08 | KD2-H4K8ac_peak_1758 | 10.05606 | C1orf137_ENSG00000203864                               |
| 1 | 117239389 | 1.17E+08 | KD2-H4K8ac_peak_1759 | 10.68431 |                                                        |
| 1 | 117240483 | 1.17E+08 | KD2-H4K8ac_peak_1760 | 10.0692  |                                                        |
| 1 | 117249948 | 1.17E+08 | KD2-H4K8ac_peak_1761 | 8.05667  |                                                        |
| 1 | 117250646 | 1.17E+08 | KD2-H4K8ac_peak_1762 | 9.1707   |                                                        |
| 1 | 117279509 | 1.17E+08 | KD2-H4K8ac_peak_1763 | 3.75035  |                                                        |
| 1 | 117367338 | 1.17E+08 | KD2-H4K8ac_peak_1764 | 11.05407 |                                                        |
| 1 | 117368888 | 1.17E+08 | KD2-H4K8ac_peak_1765 | 13.56049 |                                                        |
| 1 | 117390256 | 1.17E+08 | KD2-H4K8ac_peak_1766 | 7.67496  |                                                        |
| 1 | 117396420 | 1.17E+08 | KD2-H4K8ac_peak_1767 | 6.1228   |                                                        |
| 1 | 117397985 | 1.17E+08 | KD2-H4K8ac_peak_1768 | 12.25733 |                                                        |
| 1 | 117421100 | 1.17E+08 | KD2-H4K8ac_peak_1769 | 13.92307 |                                                        |
| 1 | 117452167 | 1.17E+08 | KD2-H4K8ac_peak_1770 | 6.66359  | RP4-753F5.1_ENSG00000272715;PTGFRN_ENSG00000134247     |
| 1 | 117452801 | 1.17E+08 | KD2-H4K8ac_peak_1771 | 9.11891  | RP4-753F5.1_ENSG00000272715;PTGFRN_ENSG00000134247     |
| 1 | 117601917 | 1.18E+08 | KD2-H4K8ac_peak_1772 | 6.0073   | RP11-27K13.3_ENSG00000236137;TTF2_ENSG00000116830      |
| 1 | 117664558 | 1.18E+08 | KD2-H4K8ac_peak_1773 | 13.21979 | TRIM45_ENSG00000134253                                 |
| 1 | 117909106 | 1.18E+08 | KD2-H4K8ac_peak_1774 | 10.4923  | MAN1A2_ENSG00000198162                                 |
| 1 | 118108338 | 1.18E+08 | KD2-H4K8ac_peak_1775 | 5.26591  |                                                        |
| 1 | 118147916 | 1.18E+08 | KD2-H4K8ac_peak_1776 | 6.40683  | AL157902.3_ENSG00000236866;FAM46C_ENSG00000183508      |
| 1 | 118472465 | 1.18E+08 | KD2-H4K8ac_peak_1777 | 8.79106  | GDAP2_ENSG00000196505;WDR3_ENSG00000065183             |
| 1 | 119683041 | 1.2E+08  | KD2-H4K8ac_peak_1778 | 8.30974  | WARS2_ENSG00000116874;RP11-418J17.1_ENSG00000231365    |
| 1 | 120190531 | 1.2E+08  | KD2-H4K8ac_peak_1779 | 13.31016 | ZNF697_ENSG00000143067                                 |
| 1 | 120190992 | 1.2E+08  | KD2-H4K8ac_peak_1780 | 21.11201 | ZNF697_ENSG00000143067                                 |
| 1 | 120254981 | 1.2E+08  | KD2-H4K8ac_peak_1781 | 11.24702 |                                                        |
| 1 | 120611665 | 1.21E+08 | KD2-H4K8ac_peak_1782 | 6.98405  | NOTCH2_ENSG00000134250                                 |
| 1 | 120836617 | 1.21E+08 | KD2-H4K8ac_peak_1783 | 11.05407 | FAM72B_ENSG00000188610                                 |
| 1 | 142617952 | 1.43E+08 | KD2-H4K8ac_peak_1784 | 28.25849 | RP11-417J8.3_ENSG00000230880                           |
| 1 | 143275549 | 1.43E+08 | KD2-H4K8ac_peak_1785 | 8.86099  |                                                        |
| 1 | 143467269 | 1.43E+08 | KD2-H4K8ac_peak_1786 | 17.43705 | RP11-435B5.4_ENSG00000185044                           |
| 1 | 143467987 | 1.43E+08 | KD2-H4K8ac_peak_1787 | 25.8903  | RP11-435B5.4_ENSG00000185044                           |
| 1 | 143743386 | 1.44E+08 | KD2-H4K8ac_peak_1788 | 11.05155 |                                                        |
| 1 | 144519938 | 1.45E+08 | KD2-H4K8ac_peak_1789 | 12.82393 |                                                        |
| 1 | 144593764 | 1.45E+08 | KD2-H4K8ac_peak_1790 | 17.42905 | RP11-640M9.2_ENSG00000225241                           |
| 1 | 144931670 | 1.45E+08 | KD2-H4K8ac_peak_1791 | 15.39448 |                                                        |
| 1 | 145209073 | 1.45E+08 | KD2-H4K8ac_peak_1792 | 4.37809  | NOTCH2NL_ENSG00000213240;RP11-458D21.5_ENSG00000255168 |

|   |           |          |                      |          |                                                                                                     |
|---|-----------|----------|----------------------|----------|-----------------------------------------------------------------------------------------------------|
| 1 | 145381628 | 1.45E+08 | KD2-H4K8ac_peak_1793 | 7.87536  | RP11-458D21.1_ENSG00000233396;RNVU1-6_ENSG00000201558                                               |
| 1 | 145400054 | 1.45E+08 | KD2-H4K8ac_peak_1794 | 4.85088  |                                                                                                     |
| 1 | 145437517 | 1.45E+08 | KD2-H4K8ac_peak_1795 | 11.55418 | TXNIP_ENSG00000117289                                                                               |
| 1 | 145473481 | 1.45E+08 | KD2-H4K8ac_peak_1796 | 4.27127  |                                                                                                     |
| 1 | 145477259 | 1.45E+08 | KD2-H4K8ac_peak_1797 | 7.57336  | LIX1L_ENSG00000152022                                                                               |
| 1 | 145516722 | 1.46E+08 | KD2-H4K8ac_peak_1798 | 6.99815  | GNRHR2_ENSG00000211451;PEX11B_ENSG00000131779                                                       |
| 1 | 145542662 | 1.46E+08 | KD2-H4K8ac_peak_1799 | 10.17486 | RP11-315I20.3_ENSG00000244619                                                                       |
| 1 | 145575319 | 1.46E+08 | KD2-H4K8ac_peak_1800 | 9.34989  | PIAS3_ENSG00000131788                                                                               |
| 1 | 145576036 | 1.46E+08 | KD2-H4K8ac_peak_1801 | 13.73635 | PIAS3_ENSG00000131788                                                                               |
| 1 | 145588901 | 1.46E+08 | KD2-H4K8ac_peak_1802 | 14.68449 | NUDT17_ENSG00000186364                                                                              |
| 1 | 145610578 | 1.46E+08 | KD2-H4K8ac_peak_1803 | 16.57619 | POLR3C_ENSG00000186141;RNF115_ENSG00000121848                                                       |
| 1 | 145713477 | 1.46E+08 | KD2-H4K8ac_peak_1804 | 5.85291  |                                                                                                     |
| 1 | 145717359 | 1.46E+08 | KD2-H4K8ac_peak_1805 | 4.90805  |                                                                                                     |
| 1 | 145727045 | 1.46E+08 | KD2-H4K8ac_peak_1806 | 6.24114  | PDZK1_ENSG00000174827                                                                               |
| 1 | 145826638 | 1.46E+08 | KD2-H4K8ac_peak_1807 | 29.57597 | GPR89A_ENSG00000117262;WI2-925H4.1_ENSG00000235702                                                  |
| 1 | 146009284 | 1.46E+08 | KD2-H4K8ac_peak_1808 | 11.00004 |                                                                                                     |
| 1 | 146643509 | 1.47E+08 | KD2-H4K8ac_peak_1809 | 7.57336  | PRKAB2_ENSG00000131791;RP11-337C18.8_ENSG00000237188;RP11-337C18.10_ENSG00000273071                 |
| 1 | 146644347 | 1.47E+08 | KD2-H4K8ac_peak_1810 | 14.84212 | PRKAB2_ENSG00000131791;RP11-337C18.8_ENSG00000237188;RP11-337C18.10_ENSG00000273071                 |
| 1 | 146645129 | 1.47E+08 | KD2-H4K8ac_peak_1811 | 8.90012  | RP11-337C18.8_ENSG00000237188;RP11-337C18.10_ENSG00000273071                                        |
| 1 | 146714379 | 1.47E+08 | KD2-H4K8ac_peak_1812 | 19.63735 | FMO5_ENSG00000131781;CHD1L_ENSG00000131778                                                          |
| 1 | 147012293 | 1.47E+08 | KD2-H4K8ac_peak_1813 | 7.94441  | BCL9_ENSG00000116128                                                                                |
| 1 | 147013437 | 1.47E+08 | KD2-H4K8ac_peak_1814 | 10.19949 | BCL9_ENSG00000116128                                                                                |
| 1 | 147070854 | 1.47E+08 | KD2-H4K8ac_peak_1815 | 5.75757  |                                                                                                     |
| 1 | 147072005 | 1.47E+08 | KD2-H4K8ac_peak_1816 | 8.85813  |                                                                                                     |
| 1 | 147141737 | 1.47E+08 | KD2-H4K8ac_peak_1817 | 12.08081 | ACP6_ENSG00000162836                                                                                |
| 1 | 147142782 | 1.47E+08 | KD2-H4K8ac_peak_1818 | 12.57143 | ACP6_ENSG00000162836                                                                                |
| 1 | 147400585 | 1.47E+08 | KD2-H4K8ac_peak_1819 | 9.26408  | GPR89B_ENSG00000188092                                                                              |
| 1 | 148193386 | 1.48E+08 | KD2-H4K8ac_peak_1820 | 4.42765  | RP11-289I10.2_ENSG00000223612                                                                       |
| 1 | 148246712 | 1.48E+08 | KD2-H4K8ac_peak_1821 | 10.94087 |                                                                                                     |
| 1 | 148247317 | 1.48E+08 | KD2-H4K8ac_peak_1822 | 15.50901 | RP11-89F3.2_ENSG00000236140                                                                         |
| 1 | 148526870 | 1.49E+08 | KD2-H4K8ac_peak_1823 | 5.25071  |                                                                                                     |
| 1 | 148532175 | 1.49E+08 | KD2-H4K8ac_peak_1824 | 10.19949 |                                                                                                     |
| 1 | 148556077 | 1.49E+08 | KD2-H4K8ac_peak_1825 | 17.88235 | NBPF15_ENSG00000243452                                                                              |
| 1 | 148598513 | 1.49E+08 | KD2-H4K8ac_peak_1826 | 8.47116  | RP11-666A1.5_ENSG00000237253;RP11-666A1.3_ENSG00000226675                                           |
| 1 | 148927929 | 1.49E+08 | KD2-H4K8ac_peak_1827 | 6.56646  | RP11-14N7.2_ENSG00000232527                                                                         |
| 1 | 148928433 | 1.49E+08 | KD2-H4K8ac_peak_1828 | 12.42526 | RP11-14N7.2_ENSG00000232527                                                                         |
| 1 | 149222384 | 1.49E+08 | KD2-H4K8ac_peak_1829 | 15.44609 |                                                                                                     |
| 1 | 149223205 | 1.49E+08 | KD2-H4K8ac_peak_1830 | 8.32007  | RNVU1-18_ENSG00000206737                                                                            |
| 1 | 149298774 | 1.49E+08 | KD2-H4K8ac_peak_1831 | 7.76104  |                                                                                                     |
| 1 | 149784624 | 1.5E+08  | KD2-H4K8ac_peak_1832 | 8.85813  | HIST2H2BF_ENSG00000203814;HIST2H3D_ENSG00000183598                                                  |
| 1 | 149857793 | 1.5E+08  | KD2-H4K8ac_peak_1833 | 4.79789  | HIST2H2BE_ENSG00000184678;HIST2H2AC_ENSG00000184260                                                 |
| 1 | 149858570 | 1.5E+08  | KD2-H4K8ac_peak_1834 | 6.40874  | HIST2H2BE_ENSG00000184678;HIST2H2AC_ENSG00000184260;HIST2H2AB_ENSG00000184270;BOLA1_ENSG00000178096 |
| 1 | 149860314 | 1.5E+08  | KD2-H4K8ac_peak_1835 | 4.66592  | HIST2H2AB_ENSG00000184270;BOLA1_ENSG00000178096                                                     |
| 1 | 149871197 | 1.5E+08  | KD2-H4K8ac_peak_1836 | 26.38304 |                                                                                                     |
| 1 | 149888858 | 1.5E+08  | KD2-H4K8ac_peak_1837 | 11.05467 | SV2A_ENSG00000159164                                                                                |
| 1 | 149899838 | 1.5E+08  | KD2-H4K8ac_peak_1838 | 12.08081 | SF3B4_ENSG00000143368                                                                               |

|   |           |          |                      |          |                                                     |
|---|-----------|----------|----------------------|----------|-----------------------------------------------------|
| 1 | 149982151 | 1.5E+08  | KD2-H4K8ac_peak_1839 | 9.63487  | OTUD7B_ENSG00000163113                              |
| 1 | 149982815 | 1.5E+08  | KD2-H4K8ac_peak_1840 | 10.29842 | OTUD7B_ENSG00000163113                              |
| 1 | 150039066 | 1.5E+08  | KD2-H4K8ac_peak_1841 | 10.53377 | VPS45_ENSG00000136631                               |
| 1 | 150039496 | 1.5E+08  | KD2-H4K8ac_peak_1842 | 12.93209 | VPS45_ENSG00000136631                               |
| 1 | 150121594 | 1.5E+08  | KD2-H4K8ac_peak_1843 | 14.85549 | PLEKHO1_ENSG00000023902                             |
| 1 | 150185400 | 1.5E+08  | KD2-H4K8ac_peak_1844 | 6.65673  |                                                     |
| 1 | 150186755 | 1.5E+08  | KD2-H4K8ac_peak_1845 | 5.82799  |                                                     |
| 1 | 150207390 | 1.5E+08  | KD2-H4K8ac_peak_1846 | 14.27217 | ANP32E_ENSG00000143401;RNU2-17P_ENSG00000222222     |
| 1 | 150209609 | 1.5E+08  | KD2-H4K8ac_peak_1847 | 4.67342  | RNU2-17P_ENSG00000222222                            |
| 1 | 150228878 | 1.5E+08  | KD2-H4K8ac_peak_1848 | 5.88845  | RP4-790G17.7_ENSG00000271845;CA14_ENSG00000118298   |
| 1 | 150229278 | 1.5E+08  | KD2-H4K8ac_peak_1849 | 4.84206  | RP4-790G17.7_ENSG00000271845;CA14_ENSG00000118298   |
| 1 | 150240979 | 1.5E+08  | KD2-H4K8ac_peak_1850 | 13.83097 | APH1A_ENSG00000117362;C1orf54_ENSG00000118292       |
| 1 | 150241698 | 1.5E+08  | KD2-H4K8ac_peak_1851 | 14.8083  | APH1A_ENSG00000117362                               |
| 1 | 150254036 | 1.5E+08  | KD2-H4K8ac_peak_1852 | 3.90565  | C1orf51_ENSG00000159208                             |
| 1 | 150264660 | 1.5E+08  | KD2-H4K8ac_peak_1853 | 7.40314  |                                                     |
| 1 | 150266010 | 1.5E+08  | KD2-H4K8ac_peak_1854 | 8.16906  | MRPS21_ENSG00000187145                              |
| 1 | 150293210 | 1.5E+08  | KD2-H4K8ac_peak_1855 | 12.08081 | PRPF3_ENSG00000117360                               |
| 1 | 150335038 | 1.5E+08  | KD2-H4K8ac_peak_1856 | 7.36799  | RPRD2_ENSG00000163125                               |
| 1 | 150336181 | 1.5E+08  | KD2-H4K8ac_peak_1857 | 17.70837 | RPRD2_ENSG00000163125                               |
| 1 | 150338160 | 1.5E+08  | KD2-H4K8ac_peak_1858 | 4.91674  |                                                     |
| 1 | 150418381 | 1.5E+08  | KD2-H4K8ac_peak_1859 | 5.97274  |                                                     |
| 1 | 150458211 | 1.5E+08  | KD2-H4K8ac_peak_1860 | 5.04761  |                                                     |
| 1 | 150459489 | 1.5E+08  | KD2-H4K8ac_peak_1861 | 9.58924  | TARS2_ENSG00000143374                               |
| 1 | 150459922 | 1.5E+08  | KD2-H4K8ac_peak_1862 | 20.42458 | TARS2_ENSG00000143374                               |
| 1 | 150487653 | 1.5E+08  | KD2-H4K8ac_peak_1863 | 7.49599  | LINC00568_ENSG00000228126                           |
| 1 | 150488248 | 1.5E+08  | KD2-H4K8ac_peak_1864 | 23.28866 | LINC00568_ENSG00000228126                           |
| 1 | 150504364 | 1.51E+08 | KD2-H4K8ac_peak_1865 | 6.25869  |                                                     |
| 1 | 150521155 | 1.51E+08 | KD2-H4K8ac_peak_1866 | 7.33452  | ADAMTSL4_ENSG00000143382;AL356356.1_ENSG00000225996 |
| 1 | 150533617 | 1.51E+08 | KD2-H4K8ac_peak_1867 | 11.8457  | ADAMTSL4-AS1_ENSG00000203804                        |
| 1 | 150534650 | 1.51E+08 | KD2-H4K8ac_peak_1868 | 10.12072 | ADAMTSL4-AS1_ENSG00000203804                        |
| 1 | 150551359 | 1.51E+08 | KD2-H4K8ac_peak_1869 | 11.44887 | MCL1_ENSG00000143384                                |
| 1 | 150552356 | 1.51E+08 | KD2-H4K8ac_peak_1870 | 10.43145 | MCL1_ENSG00000143384                                |
| 1 | 150594278 | 1.51E+08 | KD2-H4K8ac_peak_1871 | 4.38478  |                                                     |
| 1 | 150601791 | 1.51E+08 | KD2-H4K8ac_peak_1872 | 8.48413  | ENSA_ENSG00000143420                                |
| 1 | 150602449 | 1.51E+08 | KD2-H4K8ac_peak_1873 | 10.20046 | ENSA_ENSG00000143420                                |
| 1 | 150670242 | 1.51E+08 | KD2-H4K8ac_peak_1874 | 6.30229  | GOLPH3L_ENSG00000143457                             |
| 1 | 150685148 | 1.51E+08 | KD2-H4K8ac_peak_1875 | 5.25071  |                                                     |
| 1 | 150736828 | 1.51E+08 | KD2-H4K8ac_peak_1876 | 9.51625  |                                                     |
| 1 | 150738028 | 1.51E+08 | KD2-H4K8ac_peak_1877 | 5.9696   | CTSS_ENSG00000163131                                |
| 1 | 150848730 | 1.51E+08 | KD2-H4K8ac_peak_1878 | 7.98621  | ARNT_ENSG00000143437                                |
| 1 | 150849436 | 1.51E+08 | KD2-H4K8ac_peak_1879 | 13.81781 | ARNT_ENSG00000143437                                |
| 1 | 150851656 | 1.51E+08 | KD2-H4K8ac_peak_1880 | 8.26565  |                                                     |
| 1 | 150898037 | 1.51E+08 | KD2-H4K8ac_peak_1881 | 13.72769 | SETDB1_ENSG00000143379                              |
| 1 | 150898875 | 1.51E+08 | KD2-H4K8ac_peak_1882 | 8.83582  | SETDB1_ENSG00000143379                              |
| 1 | 150946448 | 1.51E+08 | KD2-H4K8ac_peak_1883 | 17.04347 | CERS2_ENSG00000143418;RP11-316M1.3_ENSG00000231073  |
| 1 | 150951798 | 1.51E+08 | KD2-H4K8ac_peak_1884 | 7.36799  |                                                     |

|   |           |          |                      |          |                                                                                                         |
|---|-----------|----------|----------------------|----------|---------------------------------------------------------------------------------------------------------|
| 1 | 150978943 | 1.51E+08 | KD2-H4K8ac_peak_1885 | 8.04448  |                                                                                                         |
| 1 | 150981001 | 1.51E+08 | KD2-H4K8ac_peak_1886 | 11.24702 | FAM63A_ENSG00000143409;PRUNE_ENSG00000143363                                                            |
| 1 | 151019613 | 1.51E+08 | KD2-H4K8ac_peak_1887 | 11.05155 | C1orf56_ENSG00000143443                                                                                 |
| 1 | 151031289 | 1.51E+08 | KD2-H4K8ac_peak_1888 | 15.66774 |                                                                                                         |
| 1 | 151042765 | 1.51E+08 | KD2-H4K8ac_peak_1889 | 20.53631 | CDC42SE1_ENSG00000197622;GABPB2_ENSG00000143458                                                         |
| 1 | 151118814 | 1.51E+08 | KD2-H4K8ac_peak_1890 | 5.19622  | SEMA6C_ENSG00000143434                                                                                  |
| 1 | 151137513 | 1.51E+08 | KD2-H4K8ac_peak_1891 | 6.20982  | LYSMD1_ENSG00000163155                                                                                  |
| 1 | 151138052 | 1.51E+08 | KD2-H4K8ac_peak_1892 | 10.80014 | LYSMD1_ENSG00000163155                                                                                  |
| 1 | 151138671 | 1.51E+08 | KD2-H4K8ac_peak_1893 | 7.93948  | LYSMD1_ENSG00000163155                                                                                  |
| 1 | 151162399 | 1.51E+08 | KD2-H4K8ac_peak_1894 | 16.49944 |                                                                                                         |
| 1 | 151167979 | 1.51E+08 | KD2-H4K8ac_peak_1895 | 5.88845  | VPS72_ENSG00000163159                                                                                   |
| 1 | 151226583 | 1.51E+08 | KD2-H4K8ac_peak_1896 | 18.25771 | PSMD4_ENSG00000159352                                                                                   |
| 1 | 151253510 | 1.51E+08 | KD2-H4K8ac_peak_1897 | 7.49599  | RP11-126K1.2_ENSG00000232671;ZNF687_ENSG00000143373                                                     |
| 1 | 151254034 | 1.51E+08 | KD2-H4K8ac_peak_1898 | 6.01128  | RP11-126K1.2_ENSG00000232671;ZNF687_ENSG00000143373                                                     |
| 1 | 151254786 | 1.51E+08 | KD2-H4K8ac_peak_1899 | 6.15163  | RP11-126K1.2_ENSG00000232671;ZNF687_ENSG00000143373                                                     |
| 1 | 151300597 | 1.51E+08 | KD2-H4K8ac_peak_1900 | 14.27217 | PI4KB_ENSG00000143393;RP11-126K1.9_ENSG00000273481                                                      |
| 1 | 151319393 | 1.51E+08 | KD2-H4K8ac_peak_1901 | 10.09333 | RFX5_ENSG00000143390;RP11-126K1.6_ENSG00000237976                                                       |
| 1 | 151371388 | 1.51E+08 | KD2-H4K8ac_peak_1902 | 11.60333 | PSMB4_ENSG00000159377                                                                                   |
| 1 | 151372068 | 1.51E+08 | KD2-H4K8ac_peak_1903 | 3.86308  | PSMB4_ENSG00000159377                                                                                   |
| 1 | 151432170 | 1.51E+08 | KD2-H4K8ac_peak_1904 | 15.01306 | POGZ_ENSG00000143442                                                                                    |
| 1 | 151483328 | 1.51E+08 | KD2-H4K8ac_peak_1905 | 6.0605   | CGN_ENSG00000143375                                                                                     |
| 1 | 151580404 | 1.52E+08 | KD2-H4K8ac_peak_1906 | 7.50083  |                                                                                                         |
| 1 | 151584610 | 1.52E+08 | KD2-H4K8ac_peak_1907 | 8.36079  | RP11-404E16.1_ENSG00000250734;SNX27_ENSG00000143376                                                     |
| 1 | 151700333 | 1.52E+08 | KD2-H4K8ac_peak_1908 | 6.65673  |                                                                                                         |
| 1 | 151735379 | 1.52E+08 | KD2-H4K8ac_peak_1909 | 19.33282 | MRPL9_ENSG00000143436;OAZ3_ENSG00000143450                                                              |
| 1 | 151762688 | 1.52E+08 | KD2-H4K8ac_peak_1910 | 10.29842 | TDRKH_ENSG00000182134;RP11-98D18.9_ENSG00000203288                                                      |
| 1 | 151763584 | 1.52E+08 | KD2-H4K8ac_peak_1911 | 11.43863 | TDRKH_ENSG00000182134;RP11-98D18.9_ENSG00000203288                                                      |
| 1 | 151820414 | 1.52E+08 | KD2-H4K8ac_peak_1912 | 5.01002  |                                                                                                         |
| 1 | 151882156 | 1.52E+08 | KD2-H4K8ac_peak_1913 | 24.3087  | THEM4_ENSG00000159445                                                                                   |
| 1 | 152020018 | 1.52E+08 | KD2-H4K8ac_peak_1914 | 10.74343 | S100A11_ENSG00000163191                                                                                 |
| 1 | 152020469 | 1.52E+08 | KD2-H4K8ac_peak_1915 | 13.50024 | S100A11_ENSG00000163191                                                                                 |
| 1 | 152161365 | 1.52E+08 | KD2-H4K8ac_peak_1916 | 4.8485   |                                                                                                         |
| 1 | 153508112 | 1.54E+08 | KD2-H4K8ac_peak_1917 | 5.75757  | S100A6_ENSG00000197956                                                                                  |
| 1 | 153508649 | 1.54E+08 | KD2-H4K8ac_peak_1918 | 13.80019 | S100A6_ENSG00000197956                                                                                  |
| 1 | 153518184 | 1.54E+08 | KD2-H4K8ac_peak_1919 | 9.48511  |                                                                                                         |
| 1 | 153519048 | 1.54E+08 | KD2-H4K8ac_peak_1920 | 4.06758  |                                                                                                         |
| 1 | 153538035 | 1.54E+08 | KD2-H4K8ac_peak_1921 | 8.85813  |                                                                                                         |
| 1 | 153538930 | 1.54E+08 | KD2-H4K8ac_peak_1922 | 10.43145 | S100A2_ENSG00000196754                                                                                  |
| 1 | 153540749 | 1.54E+08 | KD2-H4K8ac_peak_1923 | 10.05606 | S100A2_ENSG00000196754                                                                                  |
| 1 | 153541326 | 1.54E+08 | KD2-H4K8ac_peak_1924 | 7.40314  | S100A2_ENSG00000196754                                                                                  |
| 1 | 153559160 | 1.54E+08 | KD2-H4K8ac_peak_1925 | 9.11891  |                                                                                                         |
| 1 | 153571055 | 1.54E+08 | KD2-H4K8ac_peak_1926 | 5.13893  |                                                                                                         |
| 1 | 153606607 | 1.54E+08 | KD2-H4K8ac_peak_1927 | 13.65567 | S100A13_ENSG00000189171;RP1-178F15.5_ENSG00000271853;RP1-178F15.4_ENSG00000272030;CHTOP_ENSG00000160679 |
| 1 | 153630370 | 1.54E+08 | KD2-H4K8ac_peak_1928 | 12.93209 | SNAPIN_ENSG00000143553                                                                                  |
| 1 | 153630892 | 1.54E+08 | KD2-H4K8ac_peak_1929 | 17.43561 | SNAPIN_ENSG00000143553                                                                                  |
| 1 | 153642936 | 1.54E+08 | KD2-H4K8ac_peak_1930 | 8.18084  | ILF2_ENSG00000143621                                                                                    |

|   |           |          |                      |          |                                                    |
|---|-----------|----------|----------------------|----------|----------------------------------------------------|
| 1 | 153644361 | 1.54E+08 | KD2-H4K8ac_peak_1931 | 9.96798  | ILF2_ENSG00000143621                               |
| 1 | 153669691 | 1.54E+08 | KD2-H4K8ac_peak_1932 | 10.43145 |                                                    |
| 1 | 153683462 | 1.54E+08 | KD2-H4K8ac_peak_1933 | 3.76742  |                                                    |
| 1 | 153698949 | 1.54E+08 | KD2-H4K8ac_peak_1934 | 7.61941  | Y_RNA_ENSG00000199565                              |
| 1 | 153699608 | 1.54E+08 | KD2-H4K8ac_peak_1935 | 11.80283 | INTS3_ENSG00000143624;Y_RNA_ENSG00000199565        |
| 1 | 153700571 | 1.54E+08 | KD2-H4K8ac_peak_1936 | 21.2844  | INTS3_ENSG00000143624                              |
| 1 | 153747353 | 1.54E+08 | KD2-H4K8ac_peak_1937 | 9.34195  | SLC27A3_ENSG00000143554                            |
| 1 | 153748817 | 1.54E+08 | KD2-H4K8ac_peak_1938 | 7.45629  |                                                    |
| 1 | 153755338 | 1.54E+08 | KD2-H4K8ac_peak_1939 | 5.6845   |                                                    |
| 1 | 153852999 | 1.54E+08 | KD2-H4K8ac_peak_1940 | 9.06369  |                                                    |
| 1 | 153853835 | 1.54E+08 | KD2-H4K8ac_peak_1941 | 6.40425  |                                                    |
| 1 | 153895849 | 1.54E+08 | KD2-H4K8ac_peak_1942 | 15.13116 | GATAD2B_ENSG00000143614                            |
| 1 | 153918178 | 1.54E+08 | KD2-H4K8ac_peak_1943 | 11.80283 | DENND4B_ENSG00000198837                            |
| 1 | 153930456 | 1.54E+08 | KD2-H4K8ac_peak_1944 | 10.73392 | CRTC2_ENSG00000160741                              |
| 1 | 153935545 | 1.54E+08 | KD2-H4K8ac_peak_1945 | 13.75159 |                                                    |
| 1 | 153936375 | 1.54E+08 | KD2-H4K8ac_peak_1946 | 11.08187 |                                                    |
| 1 | 153940924 | 1.54E+08 | KD2-H4K8ac_peak_1947 | 14.17488 | SLC39A1_ENSG00000143570;CREB3L4_ENSG00000143578    |
| 1 | 153949805 | 1.54E+08 | KD2-H4K8ac_peak_1948 | 12.70959 | JTB_ENSG00000143543;RP11-422P24.11_ENSG00000272654 |
| 1 | 153958483 | 1.54E+08 | KD2-H4K8ac_peak_1949 | 5.01002  | RAB13_ENSG00000143545                              |
| 1 | 153959726 | 1.54E+08 | KD2-H4K8ac_peak_1950 | 7.76329  | RAB13_ENSG00000143545                              |
| 1 | 153962552 | 1.54E+08 | KD2-H4K8ac_peak_1951 | 15.40891 | RPS27_ENSG00000177954                              |
| 1 | 153963269 | 1.54E+08 | KD2-H4K8ac_peak_1952 | 16.57619 | RPS27_ENSG00000177954                              |
| 1 | 154155191 | 1.54E+08 | KD2-H4K8ac_peak_1953 | 10.7186  |                                                    |
| 1 | 154155848 | 1.54E+08 | KD2-H4K8ac_peak_1954 | 12.57865 |                                                    |
| 1 | 154192755 | 1.54E+08 | KD2-H4K8ac_peak_1955 | 14.99434 | C1orf43_ENSG00000143612;UBAP2L_ENSG00000143569     |
| 1 | 154193397 | 1.54E+08 | KD2-H4K8ac_peak_1956 | 23.72814 | C1orf43_ENSG00000143612;UBAP2L_ENSG00000143569     |
| 1 | 154244701 | 1.54E+08 | KD2-H4K8ac_peak_1957 | 12.93209 | HAX1_ENSG00000143575                               |
| 1 | 154296722 | 1.54E+08 | KD2-H4K8ac_peak_1958 | 15.9754  | ATP8B2_ENSG00000143515                             |
| 1 | 154324680 | 1.54E+08 | KD2-H4K8ac_peak_1959 | 4.44527  |                                                    |
| 1 | 154325397 | 1.54E+08 | KD2-H4K8ac_peak_1960 | 6.66359  |                                                    |
| 1 | 154405104 | 1.54E+08 | KD2-H4K8ac_peak_1961 | 6.80057  |                                                    |
| 1 | 154454326 | 1.54E+08 | KD2-H4K8ac_peak_1962 | 3.75035  |                                                    |
| 1 | 154465760 | 1.54E+08 | KD2-H4K8ac_peak_1963 | 10.08874 |                                                    |
| 1 | 154530606 | 1.55E+08 | KD2-H4K8ac_peak_1964 | 12.13241 | UBE2Q1_ENSG00000160714                             |
| 1 | 154531512 | 1.55E+08 | KD2-H4K8ac_peak_1965 | 31.44317 | UBE2Q1_ENSG00000160714                             |
| 1 | 154540459 | 1.55E+08 | KD2-H4K8ac_peak_1966 | 6.84261  | CHRN2_ENSG00000160716                              |
| 1 | 154580404 | 1.55E+08 | KD2-H4K8ac_peak_1967 | 12.00597 |                                                    |
| 1 | 154599927 | 1.55E+08 | KD2-H4K8ac_peak_1968 | 17.43561 | ADAR_ENSG00000160710                               |
| 1 | 154719543 | 1.55E+08 | KD2-H4K8ac_peak_1969 | 4.86324  |                                                    |
| 1 | 154720305 | 1.55E+08 | KD2-H4K8ac_peak_1970 | 11.76541 |                                                    |
| 1 | 154733101 | 1.55E+08 | KD2-H4K8ac_peak_1971 | 6.78247  |                                                    |
| 1 | 154805839 | 1.55E+08 | KD2-H4K8ac_peak_1972 | 6.65673  |                                                    |
| 1 | 154810038 | 1.55E+08 | KD2-H4K8ac_peak_1973 | 5.1628   |                                                    |
| 1 | 154813247 | 1.55E+08 | KD2-H4K8ac_peak_1974 | 7.74292  |                                                    |
| 1 | 154814766 | 1.55E+08 | KD2-H4K8ac_peak_1975 | 10.43145 |                                                    |
| 1 | 154819477 | 1.55E+08 | KD2-H4K8ac_peak_1976 | 8.84853  |                                                    |

|   |           |          |                      |          |                                                                   |
|---|-----------|----------|----------------------|----------|-------------------------------------------------------------------|
| 1 | 154908732 | 1.55E+08 | KD2-H4K8ac_peak_1977 | 9.95759  | PMVK_ENSG00000163344;RP11-307C12.13_ENSG00000270361               |
| 1 | 154909670 | 1.55E+08 | KD2-H4K8ac_peak_1978 | 5.3157   | PMVK_ENSG00000163344;RP11-307C12.13_ENSG00000270361               |
| 1 | 154914086 | 1.55E+08 | KD2-H4K8ac_peak_1979 | 5.81188  |                                                                   |
| 1 | 154928285 | 1.55E+08 | KD2-H4K8ac_peak_1980 | 7.95563  | PBXIP1_ENSG00000163346                                            |
| 1 | 154933821 | 1.55E+08 | KD2-H4K8ac_peak_1981 | 28.03233 | RP11-307C12.12_ENSG00000271380                                    |
| 1 | 154941053 | 1.55E+08 | KD2-H4K8ac_peak_1982 | 7.4653   |                                                                   |
| 1 | 154941631 | 1.55E+08 | KD2-H4K8ac_peak_1983 | 4.67342  |                                                                   |
| 1 | 154942553 | 1.55E+08 | KD2-H4K8ac_peak_1984 | 9.95119  |                                                                   |
| 1 | 154943363 | 1.55E+08 | KD2-H4K8ac_peak_1985 | 8.36432  |                                                                   |
| 1 | 154946452 | 1.55E+08 | KD2-H4K8ac_peak_1986 | 7.49599  | SHC1_ENSG00000160691;CKS1B_ENSG00000173207                        |
| 1 | 154948039 | 1.55E+08 | KD2-H4K8ac_peak_1987 | 7.07117  | CKS1B_ENSG00000173207;MIR4258_ENSG00000264349                     |
| 1 | 154956330 | 1.55E+08 | KD2-H4K8ac_peak_1988 | 6.66359  | FLAD1_ENSG00000160688                                             |
| 1 | 154973437 | 1.55E+08 | KD2-H4K8ac_peak_1989 | 8.81558  |                                                                   |
| 1 | 154975342 | 1.55E+08 | KD2-H4K8ac_peak_1990 | 18.59584 | ZBTB7B_ENSG00000160685                                            |
| 1 | 154989407 | 1.55E+08 | KD2-H4K8ac_peak_1991 | 22.03039 |                                                                   |
| 1 | 154990361 | 1.55E+08 | KD2-H4K8ac_peak_1992 | 5.1707   |                                                                   |
| 1 | 155022315 | 1.55E+08 | KD2-H4K8ac_peak_1993 | 5.12995  | ADAM15_ENSG00000143537                                            |
| 1 | 155023836 | 1.55E+08 | KD2-H4K8ac_peak_1994 | 7.43893  | ADAM15_ENSG00000143537                                            |
| 1 | 155036302 | 1.55E+08 | KD2-H4K8ac_peak_1995 | 10.45683 | EFNA4_ENSG00000243364;EFNA3_ENSG00000143590;EFNA3_ENSG00000251246 |
| 1 | 155042980 | 1.55E+08 | KD2-H4K8ac_peak_1996 | 16.86242 |                                                                   |
| 1 | 155051374 | 1.55E+08 | KD2-H4K8ac_peak_1997 | 5.85291  |                                                                   |
| 1 | 155052741 | 1.55E+08 | KD2-H4K8ac_peak_1998 | 6.31838  |                                                                   |
| 1 | 155056540 | 1.55E+08 | KD2-H4K8ac_peak_1999 | 7.92775  |                                                                   |
| 1 | 155066099 | 1.55E+08 | KD2-H4K8ac_peak_2000 | 7.90806  |                                                                   |
| 1 | 155098484 | 1.55E+08 | KD2-H4K8ac_peak_2001 | 4.67342  | EFNA1_ENSG00000169242                                             |
| 1 | 155099602 | 1.55E+08 | KD2-H4K8ac_peak_2002 | 30.17017 | EFNA1_ENSG00000169242                                             |
| 1 | 155101526 | 1.55E+08 | KD2-H4K8ac_peak_2003 | 5.13615  |                                                                   |
| 1 | 155102150 | 1.55E+08 | KD2-H4K8ac_peak_2004 | 7.70067  |                                                                   |
| 1 | 155107536 | 1.55E+08 | KD2-H4K8ac_peak_2005 | 13.38658 | SLC50A1_ENSG00000169241                                           |
| 1 | 155111695 | 1.55E+08 | KD2-H4K8ac_peak_2006 | 7.42046  |                                                                   |
| 1 | 155112406 | 1.55E+08 | KD2-H4K8ac_peak_2007 | 4.76255  | DPM3_ENSG00000179085                                              |
| 1 | 155113074 | 1.55E+08 | KD2-H4K8ac_peak_2008 | 14.59156 | DPM3_ENSG00000179085                                              |
| 1 | 155139382 | 1.55E+08 | KD2-H4K8ac_peak_2009 | 8.4716   |                                                                   |
| 1 | 155145160 | 1.55E+08 | KD2-H4K8ac_peak_2010 | 16.54484 | KRTCAP2_ENSG00000163463;TRIM46_ENSG00000163462                    |
| 1 | 155146386 | 1.55E+08 | KD2-H4K8ac_peak_2011 | 21.61343 | KRTCAP2_ENSG00000163463;TRIM46_ENSG00000163462                    |
| 1 | 155162860 | 1.55E+08 | KD2-H4K8ac_peak_2012 | 12.13241 | MUC1_ENSG00000185499;MIR92B_ENSG00000271748                       |
| 1 | 155176864 | 1.55E+08 | KD2-H4K8ac_peak_2013 | 10.55956 | MTX1_ENSG00000173171                                              |
| 1 | 155177850 | 1.55E+08 | KD2-H4K8ac_peak_2014 | 21.61343 | THBS3_ENSG00000169231;MTX1_ENSG00000173171                        |
| 1 | 155188979 | 1.55E+08 | KD2-H4K8ac_peak_2015 | 17.10757 |                                                                   |
| 1 | 155196748 | 1.55E+08 | KD2-H4K8ac_peak_2016 | 9.36516  | GBAP1_ENSG00000160766                                             |
| 1 | 155197577 | 1.55E+08 | KD2-H4K8ac_peak_2017 | 19.16083 | GBAP1_ENSG00000160766                                             |
| 1 | 155213399 | 1.55E+08 | KD2-H4K8ac_peak_2018 | 4.68059  | GBA_ENSG00000177628                                               |
| 1 | 155214755 | 1.55E+08 | KD2-H4K8ac_peak_2019 | 12.14337 | GBA_ENSG00000177628                                               |
| 1 | 155220265 | 1.55E+08 | KD2-H4K8ac_peak_2020 | 13.65567 |                                                                   |
| 1 | 155223355 | 1.55E+08 | KD2-H4K8ac_peak_2021 | 8.35576  |                                                                   |
| 1 | 155224283 | 1.55E+08 | KD2-H4K8ac_peak_2022 | 19.25648 | FAM189B_ENSG00000160767                                           |



|   |           |          |                      |          |                                                    |
|---|-----------|----------|----------------------|----------|----------------------------------------------------|
| 1 | 155225883 | 1.55E+08 | KD2-H4K8ac_peak_2023 | 7.07117  | FAM189B_ENSG00000160767                            |
| 1 | 155231548 | 1.55E+08 | KD2-H4K8ac_peak_2024 | 10.43145 | SCAMP3_ENSG00000116521                             |
| 1 | 155232312 | 1.55E+08 | KD2-H4K8ac_peak_2025 | 21.11201 | SCAMP3_ENSG00000116521                             |
| 1 | 155242792 | 1.55E+08 | KD2-H4K8ac_peak_2026 | 9.48511  |                                                    |
| 1 | 155247304 | 1.55E+08 | KD2-H4K8ac_peak_2027 | 6.40297  | CLK2_ENSG00000176444;HCN3_ENSG00000143630          |
| 1 | 155277504 | 1.55E+08 | KD2-H4K8ac_peak_2028 | 9.68182  | FDPS_ENSG00000160752                               |
| 1 | 155278788 | 1.55E+08 | KD2-H4K8ac_peak_2029 | 6.66359  | FDPS_ENSG00000160752                               |
| 1 | 155292541 | 1.55E+08 | KD2-H4K8ac_peak_2030 | 7.07117  | RUSC1-AS1_ENSG00000225855                          |
| 1 | 155293774 | 1.55E+08 | KD2-H4K8ac_peak_2031 | 12.48406 | RUSC1-AS1_ENSG00000225855                          |
| 1 | 155531921 | 1.56E+08 | KD2-H4K8ac_peak_2032 | 17.19888 | ASH1L-AS1_ENSG00000235919;ASH1L_ENSG00000116539    |
| 1 | 155532769 | 1.56E+08 | KD2-H4K8ac_peak_2033 | 7.49599  | ASH1L-AS1_ENSG00000235919;ASH1L_ENSG00000116539    |
| 1 | 155579162 | 1.56E+08 | KD2-H4K8ac_peak_2034 | 8.52559  | RP11-29H23.4_ENSG00000232519;MSTO1_ENSG00000125459 |
| 1 | 155621214 | 1.56E+08 | KD2-H4K8ac_peak_2035 | 5.54647  |                                                    |
| 1 | 155657879 | 1.56E+08 | KD2-H4K8ac_peak_2036 | 31.8111  | YY1AP1_ENSG00000163374;DAP3_ENSG00000132676        |
| 1 | 155826575 | 1.56E+08 | KD2-H4K8ac_peak_2037 | 8.4716   |                                                    |
| 1 | 155827219 | 1.56E+08 | KD2-H4K8ac_peak_2038 | 11.15405 |                                                    |
| 1 | 155830042 | 1.56E+08 | KD2-H4K8ac_peak_2039 | 10.66719 | SYT11_ENSG00000132718;GON4L_ENSG00000116580        |
| 1 | 155903879 | 1.56E+08 | KD2-H4K8ac_peak_2040 | 19.28826 | KIAA0907_ENSG00000132680                           |
| 1 | 155904552 | 1.56E+08 | KD2-H4K8ac_peak_2041 | 9.63487  | KIAA0907_ENSG00000132680                           |
| 1 | 155910311 | 1.56E+08 | KD2-H4K8ac_peak_2042 | 11.66477 | RXFP4_ENSG00000173080                              |
| 1 | 155947456 | 1.56E+08 | KD2-H4K8ac_peak_2043 | 9.95119  | RP11-336K24.12_ENSG00000273002                     |
| 1 | 155948138 | 1.56E+08 | KD2-H4K8ac_peak_2044 | 14.03283 | RP11-336K24.12_ENSG00000273002                     |
| 1 | 155990247 | 1.56E+08 | KD2-H4K8ac_peak_2045 | 10.21366 | SSR2_ENSG00000163479                               |
| 1 | 155990879 | 1.56E+08 | KD2-H4K8ac_peak_2046 | 6.99815  | SSR2_ENSG00000163479                               |
| 1 | 155995816 | 1.56E+08 | KD2-H4K8ac_peak_2047 | 10.19949 |                                                    |
| 1 | 156022904 | 1.56E+08 | KD2-H4K8ac_peak_2048 | 10.19949 | UBQLN4_ENSG00000160803                             |
| 1 | 156023654 | 1.56E+08 | KD2-H4K8ac_peak_2049 | 23.33626 | UBQLN4_ENSG00000160803;LAMTOR2_ENSG00000116586     |
| 1 | 156024639 | 1.56E+08 | KD2-H4K8ac_peak_2050 | 13.3695  | LAMTOR2_ENSG00000116586                            |
| 1 | 156039893 | 1.56E+08 | KD2-H4K8ac_peak_2051 | 7.92775  |                                                    |
| 1 | 156051204 | 1.56E+08 | KD2-H4K8ac_peak_2052 | 14.39182 | MEX3A_ENSG00000254726;LMNA_ENSG00000160789         |
| 1 | 156051999 | 1.56E+08 | KD2-H4K8ac_peak_2053 | 11.18097 | MEX3A_ENSG00000254726;LMNA_ENSG00000160789         |
| 1 | 156073570 | 1.56E+08 | KD2-H4K8ac_peak_2054 | 5.26288  |                                                    |
| 1 | 156074710 | 1.56E+08 | KD2-H4K8ac_peak_2055 | 5.49478  |                                                    |
| 1 | 156075232 | 1.56E+08 | KD2-H4K8ac_peak_2056 | 9.48511  |                                                    |
| 1 | 156075944 | 1.56E+08 | KD2-H4K8ac_peak_2057 | 13.27022 |                                                    |
| 1 | 156082226 | 1.56E+08 | KD2-H4K8ac_peak_2058 | 6.99194  |                                                    |
| 1 | 156082900 | 1.56E+08 | KD2-H4K8ac_peak_2059 | 6.04107  |                                                    |
| 1 | 156083757 | 1.56E+08 | KD2-H4K8ac_peak_2060 | 26.00444 |                                                    |
| 1 | 156092511 | 1.56E+08 | KD2-H4K8ac_peak_2061 | 8.88428  |                                                    |
| 1 | 156095843 | 1.56E+08 | KD2-H4K8ac_peak_2062 | 11.80283 |                                                    |
| 1 | 156116087 | 1.56E+08 | KD2-H4K8ac_peak_2063 | 8.10216  | SEMA4A_ENSG00000196189                             |
| 1 | 156130605 | 1.56E+08 | KD2-H4K8ac_peak_2064 | 10.43145 |                                                    |
| 1 | 156162974 | 1.56E+08 | KD2-H4K8ac_peak_2065 | 11.28831 | SNORA26_ENSG00000252236;SLC25A44_ENSG00000160785   |
| 1 | 156182288 | 1.56E+08 | KD2-H4K8ac_peak_2066 | 5.32713  | PMF1_ENSG00000160783                               |
| 1 | 156182812 | 1.56E+08 | KD2-H4K8ac_peak_2067 | 10.76532 | PMF1_ENSG00000160783                               |
| 1 | 156220758 | 1.56E+08 | KD2-H4K8ac_peak_2068 | 10.92268 |                                                    |

|   |           |          |                      |          |                                                    |
|---|-----------|----------|----------------------|----------|----------------------------------------------------|
| 1 | 156221692 | 1.56E+08 | KD2-H4K8ac_peak_2069 | 8.10216  |                                                    |
| 1 | 156252178 | 1.56E+08 | KD2-H4K8ac_peak_2070 | 15.96909 | SMG5_ENSG00000198952;TMEM79_ENSG00000163472        |
| 1 | 156252927 | 1.56E+08 | KD2-H4K8ac_peak_2071 | 3.90565  | SMG5_ENSG00000198952;TMEM79_ENSG00000163472        |
| 1 | 156261391 | 1.56E+08 | KD2-H4K8ac_peak_2072 | 7.36799  |                                                    |
| 1 | 156265164 | 1.56E+08 | KD2-H4K8ac_peak_2073 | 9.26408  | C1orf85_ENSG00000198715                            |
| 1 | 156265822 | 1.56E+08 | KD2-H4K8ac_peak_2074 | 8.76221  | C1orf85_ENSG00000198715                            |
| 1 | 156307662 | 1.56E+08 | KD2-H4K8ac_peak_2075 | 9.26408  | TSACC_ENSG00000163467                              |
| 1 | 156308392 | 1.56E+08 | KD2-H4K8ac_peak_2076 | 5.75757  |                                                    |
| 1 | 156315023 | 1.56E+08 | KD2-H4K8ac_peak_2077 | 8.93255  |                                                    |
| 1 | 156337905 | 1.56E+08 | KD2-H4K8ac_peak_2078 | 8.85813  | CCT3_ENSG00000163468;RHBG_ENSG00000132677          |
| 1 | 156353026 | 1.56E+08 | KD2-H4K8ac_peak_2079 | 5.41891  |                                                    |
| 1 | 156390027 | 1.56E+08 | KD2-H4K8ac_peak_2080 | 5.32713  | MIR9-1_ENSG00000207933                             |
| 1 | 156390549 | 1.56E+08 | KD2-H4K8ac_peak_2081 | 16.44604 | MIR9-1_ENSG00000207933                             |
| 1 | 156405850 | 1.56E+08 | KD2-H4K8ac_peak_2082 | 9.402    |                                                    |
| 1 | 156425862 | 1.56E+08 | KD2-H4K8ac_peak_2083 | 8.16906  | RP11-98G7.1_ENSG00000236947                        |
| 1 | 156426579 | 1.56E+08 | KD2-H4K8ac_peak_2084 | 22.07161 | RP11-98G7.1_ENSG00000236947                        |
| 1 | 156470236 | 1.56E+08 | KD2-H4K8ac_peak_2085 | 6.52179  | MEF2D_ENSG00000116604                              |
| 1 | 156470870 | 1.56E+08 | KD2-H4K8ac_peak_2086 | 23.24123 | MEF2D_ENSG00000116604                              |
| 1 | 156472445 | 1.56E+08 | KD2-H4K8ac_peak_2087 | 5.26743  |                                                    |
| 1 | 156473026 | 1.56E+08 | KD2-H4K8ac_peak_2088 | 5.90519  |                                                    |
| 1 | 156473919 | 1.56E+08 | KD2-H4K8ac_peak_2089 | 9.89383  |                                                    |
| 1 | 156474536 | 1.56E+08 | KD2-H4K8ac_peak_2090 | 20.26332 |                                                    |
| 1 | 156475462 | 1.56E+08 | KD2-H4K8ac_peak_2091 | 8.36432  |                                                    |
| 1 | 156542560 | 1.57E+08 | KD2-H4K8ac_peak_2092 | 4.34409  | IQGAP3_ENSG00000183856                             |
| 1 | 156561137 | 1.57E+08 | KD2-H4K8ac_peak_2093 | 9.26408  | APOA1BP_ENSG00000163382                            |
| 1 | 156570936 | 1.57E+08 | KD2-H4K8ac_peak_2094 | 7.28628  | GPATCH4_ENSG00000160818                            |
| 1 | 156611744 | 1.57E+08 | KD2-H4K8ac_peak_2095 | 8.85813  | RP11-284F21.9_ENSG00000272068;BCAN_ENSG00000132692 |
| 1 | 156626527 | 1.57E+08 | KD2-H4K8ac_peak_2096 | 5.72657  |                                                    |
| 1 | 156627715 | 1.57E+08 | KD2-H4K8ac_peak_2097 | 6.55628  |                                                    |
| 1 | 156629503 | 1.57E+08 | KD2-H4K8ac_peak_2098 | 10.73134 |                                                    |
| 1 | 156630325 | 1.57E+08 | KD2-H4K8ac_peak_2099 | 8.34752  | RP11-284F21.7_ENSG00000229953                      |
| 1 | 156631214 | 1.57E+08 | KD2-H4K8ac_peak_2100 | 14.66631 | RP11-284F21.7_ENSG00000229953                      |
| 1 | 156637798 | 1.57E+08 | KD2-H4K8ac_peak_2101 | 5.13615  |                                                    |
| 1 | 156645968 | 1.57E+08 | KD2-H4K8ac_peak_2102 | 10.54778 | NES_ENSG00000132688                                |
| 1 | 156659679 | 1.57E+08 | KD2-H4K8ac_peak_2103 | 16.31471 |                                                    |
| 1 | 156660804 | 1.57E+08 | KD2-H4K8ac_peak_2104 | 7.59794  | RP11-66D17.3_ENSG00000237588                       |
| 1 | 156661802 | 1.57E+08 | KD2-H4K8ac_peak_2105 | 10.5887  | RP11-66D17.3_ENSG00000237588                       |
| 1 | 156662683 | 1.57E+08 | KD2-H4K8ac_peak_2106 | 14.66259 | RP11-66D17.3_ENSG00000237588                       |
| 1 | 156663450 | 1.57E+08 | KD2-H4K8ac_peak_2107 | 9.048    |                                                    |
| 1 | 156674713 | 1.57E+08 | KD2-H4K8ac_peak_2108 | 8.16906  | CRABP2_ENSG00000143320                             |
| 1 | 156675505 | 1.57E+08 | KD2-H4K8ac_peak_2109 | 6.66359  | CRABP2_ENSG00000143320                             |
| 1 | 156676153 | 1.57E+08 | KD2-H4K8ac_peak_2110 | 8.36432  | CRABP2_ENSG00000143320                             |
| 1 | 156677355 | 1.57E+08 | KD2-H4K8ac_peak_2111 | 7.44247  |                                                    |
| 1 | 156678433 | 1.57E+08 | KD2-H4K8ac_peak_2112 | 7.08571  |                                                    |
| 1 | 156679050 | 1.57E+08 | KD2-H4K8ac_peak_2113 | 5.96384  |                                                    |
| 1 | 156679942 | 1.57E+08 | KD2-H4K8ac_peak_2114 | 18.33759 |                                                    |

|   |           |          |                      |          |                                                  |
|---|-----------|----------|----------------------|----------|--------------------------------------------------|
| 1 | 156681380 | 1.57E+08 | KD2-H4K8ac_peak_2115 | 10.78621 | RP11-66D17.5_ENSG00000223356                     |
| 1 | 156698743 | 1.57E+08 | KD2-H4K8ac_peak_2116 | 22.28045 | ISG20L2_ENSG00000143319;RRNAD1_ENSG00000143303   |
| 1 | 156710454 | 1.57E+08 | KD2-H4K8ac_peak_2117 | 11.50346 | MRPL24_ENSG00000143314                           |
| 1 | 156716632 | 1.57E+08 | KD2-H4K8ac_peak_2118 | 9.26408  |                                                  |
| 1 | 156717110 | 1.57E+08 | KD2-H4K8ac_peak_2119 | 11.24702 |                                                  |
| 1 | 156718166 | 1.57E+08 | KD2-H4K8ac_peak_2120 | 8.58069  |                                                  |
| 1 | 156719963 | 1.57E+08 | KD2-H4K8ac_peak_2121 | 5.73924  | PRCC_ENSG00000143294                             |
| 1 | 156720590 | 1.57E+08 | KD2-H4K8ac_peak_2122 | 17.65594 | PRCC_ENSG00000143294                             |
| 1 | 156721789 | 1.57E+08 | KD2-H4K8ac_peak_2123 | 22.03039 |                                                  |
| 1 | 156730147 | 1.57E+08 | KD2-H4K8ac_peak_2124 | 4.211    |                                                  |
| 1 | 156736159 | 1.57E+08 | KD2-H4K8ac_peak_2125 | 8.43115  | HDGF_ENSG00000143321                             |
| 1 | 156737351 | 1.57E+08 | KD2-H4K8ac_peak_2126 | 20.85474 | HDGF_ENSG00000143321                             |
| 1 | 156744130 | 1.57E+08 | KD2-H4K8ac_peak_2127 | 4.67342  |                                                  |
| 1 | 156770962 | 1.57E+08 | KD2-H4K8ac_peak_2128 | 8.45455  |                                                  |
| 1 | 156771669 | 1.57E+08 | KD2-H4K8ac_peak_2129 | 9.63487  |                                                  |
| 1 | 156822552 | 1.57E+08 | KD2-H4K8ac_peak_2130 | 7.7553   |                                                  |
| 1 | 156828177 | 1.57E+08 | KD2-H4K8ac_peak_2131 | 6.84261  | INSRR_ENSG00000027644                            |
| 1 | 156828658 | 1.57E+08 | KD2-H4K8ac_peak_2132 | 13.20642 | INSRR_ENSG00000027644                            |
| 1 | 156830294 | 1.57E+08 | KD2-H4K8ac_peak_2133 | 12.94604 |                                                  |
| 1 | 156859648 | 1.57E+08 | KD2-H4K8ac_peak_2134 | 7.82254  |                                                  |
| 1 | 156864838 | 1.57E+08 | KD2-H4K8ac_peak_2135 | 9.36516  |                                                  |
| 1 | 156883144 | 1.57E+08 | KD2-H4K8ac_peak_2136 | 13.34725 |                                                  |
| 1 | 156884408 | 1.57E+08 | KD2-H4K8ac_peak_2137 | 9.6589   |                                                  |
| 1 | 156897325 | 1.57E+08 | KD2-H4K8ac_peak_2138 | 16.822   |                                                  |
| 1 | 157015060 | 1.57E+08 | KD2-H4K8ac_peak_2139 | 11.80283 | ARHGEF11_ENSG00000132694                         |
| 1 | 157015795 | 1.57E+08 | KD2-H4K8ac_peak_2140 | 9.89383  | ARHGEF11_ENSG00000132694                         |
| 1 | 157087428 | 1.57E+08 | KD2-H4K8ac_peak_2141 | 5.08628  |                                                  |
| 1 | 157107786 | 1.57E+08 | KD2-H4K8ac_peak_2142 | 23.57681 | ETV3_ENSG00000117036                             |
| 1 | 157133688 | 1.57E+08 | KD2-H4K8ac_peak_2143 | 7.51054  |                                                  |
| 1 | 158119144 | 1.58E+08 | KD2-H4K8ac_peak_2144 | 4.42765  |                                                  |
| 1 | 158119870 | 1.58E+08 | KD2-H4K8ac_peak_2145 | 6.31143  |                                                  |
| 1 | 159750799 | 1.6E+08  | KD2-H4K8ac_peak_2146 | 9.6589   | DUSP23_ENSG00000158716                           |
| 1 | 159824229 | 1.6E+08  | KD2-H4K8ac_peak_2147 | 9.6247   | C1orf204_ENSG00000188004                         |
| 1 | 159824790 | 1.6E+08  | KD2-H4K8ac_peak_2148 | 6.36375  | C1orf204_ENSG00000188004                         |
| 1 | 159892295 | 1.6E+08  | KD2-H4K8ac_peak_2149 | 4.86324  |                                                  |
| 1 | 159894476 | 1.6E+08  | KD2-H4K8ac_peak_2150 | 7.28628  |                                                  |
| 1 | 159915738 | 1.6E+08  | KD2-H4K8ac_peak_2151 | 6.52179  | IGSF9_ENSG00000085552                            |
| 1 | 160001908 | 1.6E+08  | KD2-H4K8ac_peak_2152 | 5.66705  | PIGM_ENSG00000143315                             |
| 1 | 160067866 | 1.6E+08  | KD2-H4K8ac_peak_2153 | 6.04107  | IGSF8_ENSG00000162729                            |
| 1 | 160068947 | 1.6E+08  | KD2-H4K8ac_peak_2154 | 6.84261  | IGSF8_ENSG00000162729                            |
| 1 | 160071105 | 1.6E+08  | KD2-H4K8ac_peak_2155 | 7.07117  |                                                  |
| 1 | 160163268 | 1.6E+08  | KD2-H4K8ac_peak_2156 | 12.79505 |                                                  |
| 1 | 160174533 | 1.6E+08  | KD2-H4K8ac_peak_2157 | 15.9754  | PEA15_ENSG00000162734;AL121987.1_ENSG00000265381 |
| 1 | 160231704 | 1.6E+08  | KD2-H4K8ac_peak_2158 | 25.44388 | RP11-574F21.2_ENSG00000228606                    |
| 1 | 160232490 | 1.6E+08  | KD2-H4K8ac_peak_2159 | 11.43863 | RP11-574F21.2_ENSG00000228606                    |
| 1 | 160254659 | 1.6E+08  | KD2-H4K8ac_peak_2160 | 12.57297 | DCAF8_ENSG00000132716;DCAF8_ENSG00000258465      |

|   |           |          |                      |          |                                                      |
|---|-----------|----------|----------------------|----------|------------------------------------------------------|
| 1 | 160312637 | 1.6E+08  | KD2-H4K8ac_peak_2161 | 19.63735 | COPA_ENSG00000122218;NCSTN_ENSG00000162736           |
| 1 | 160332196 | 1.6E+08  | KD2-H4K8ac_peak_2162 | 6.84261  |                                                      |
| 1 | 160346079 | 1.6E+08  | KD2-H4K8ac_peak_2163 | 7.03656  |                                                      |
| 1 | 160369561 | 1.6E+08  | KD2-H4K8ac_peak_2164 | 16.86242 |                                                      |
| 1 | 160588863 | 1.61E+08 | KD2-H4K8ac_peak_2165 | 6.0073   |                                                      |
| 1 | 161008284 | 1.61E+08 | KD2-H4K8ac_peak_2166 | 6.24114  | RP11-544M22.13_ENSG00000270149;TSTD1_ENSG00000215845 |
| 1 | 161015183 | 1.61E+08 | KD2-H4K8ac_peak_2167 | 19.28826 | USF1_ENSG00000158773                                 |
| 1 | 161015892 | 1.61E+08 | KD2-H4K8ac_peak_2168 | 11.92978 | USF1_ENSG00000158773                                 |
| 1 | 161068267 | 1.61E+08 | KD2-H4K8ac_peak_2169 | 4.27244  | KLHDC9_ENSG00000162755                               |
| 1 | 161087393 | 1.61E+08 | KD2-H4K8ac_peak_2170 | 19.28826 | PFDN2_ENSG00000143256;NIT1_ENSG00000158793           |
| 1 | 161101927 | 1.61E+08 | KD2-H4K8ac_peak_2171 | 10.43145 | DEDD_ENSG00000158796                                 |
| 1 | 161102407 | 1.61E+08 | KD2-H4K8ac_peak_2172 | 14.66631 | DEDD_ENSG00000158796                                 |
| 1 | 161103672 | 1.61E+08 | KD2-H4K8ac_peak_2173 | 4.53319  |                                                      |
| 1 | 161122500 | 1.61E+08 | KD2-H4K8ac_peak_2174 | 6.27719  | UFC1_ENSG00000143222                                 |
| 1 | 161123705 | 1.61E+08 | KD2-H4K8ac_peak_2175 | 16.67374 |                                                      |
| 1 | 161128956 | 1.61E+08 | KD2-H4K8ac_peak_2176 | 10.35678 | RP11-297K8.2_ENSG00000224985;USP21_ENSG00000143258   |
| 1 | 161146726 | 1.61E+08 | KD2-H4K8ac_peak_2177 | 7.40314  | B4GALT3_ENSG00000158850                              |
| 1 | 161147391 | 1.61E+08 | KD2-H4K8ac_peak_2178 | 8.30974  | B4GALT3_ENSG00000158850                              |
| 1 | 161166092 | 1.61E+08 | KD2-H4K8ac_peak_2179 | 16.89142 | NDUFS2_ENSG00000158864                               |
| 1 | 161167261 | 1.61E+08 | KD2-H4K8ac_peak_2180 | 16.25682 | NDUFS2_ENSG00000158864;ADAMTS4_ENSG00000158859       |
| 1 | 161170157 | 1.61E+08 | KD2-H4K8ac_peak_2181 | 8.21852  |                                                      |
| 1 | 161170627 | 1.61E+08 | KD2-H4K8ac_peak_2182 | 9.69846  |                                                      |
| 1 | 161171315 | 1.61E+08 | KD2-H4K8ac_peak_2183 | 7.43893  |                                                      |
| 1 | 161172218 | 1.61E+08 | KD2-H4K8ac_peak_2184 | 13.1923  |                                                      |
| 1 | 161195043 | 1.61E+08 | KD2-H4K8ac_peak_2185 | 9.89383  | TOMM40L_ENSG00000158882                              |
| 1 | 161195883 | 1.61E+08 | KD2-H4K8ac_peak_2186 | 10.45683 | TOMM40L_ENSG00000158882;MIR5187_ENSG00000263548      |
| 1 | 161275771 | 1.61E+08 | KD2-H4K8ac_peak_2187 | 16.95399 |                                                      |
| 1 | 161283486 | 1.61E+08 | KD2-H4K8ac_peak_2188 | 15.58442 | SDHC_ENSG00000143252                                 |
| 1 | 161359019 | 1.61E+08 | KD2-H4K8ac_peak_2189 | 9.36516  |                                                      |
| 1 | 161368257 | 1.61E+08 | KD2-H4K8ac_peak_2190 | 7.76329  |                                                      |
| 1 | 161368875 | 1.61E+08 | KD2-H4K8ac_peak_2191 | 18.53991 |                                                      |
| 1 | 161369768 | 1.61E+08 | KD2-H4K8ac_peak_2192 | 6.84261  |                                                      |
| 1 | 161410255 | 1.61E+08 | KD2-H4K8ac_peak_2193 | 7.73264  |                                                      |
| 1 | 161696496 | 1.62E+08 | KD2-H4K8ac_peak_2194 | 8.85813  |                                                      |
| 1 | 161697040 | 1.62E+08 | KD2-H4K8ac_peak_2195 | 12.79505 |                                                      |
| 1 | 161719610 | 1.62E+08 | KD2-H4K8ac_peak_2196 | 11.08187 | DUSP12_ENSG00000081721                               |
| 1 | 161993431 | 1.62E+08 | KD2-H4K8ac_peak_2197 | 4.91674  | OLFML2B_ENSG00000162745                              |
| 1 | 162039169 | 1.62E+08 | KD2-H4K8ac_peak_2198 | 11.90231 | NOS1AP_ENSG00000198929                               |
| 1 | 162087273 | 1.62E+08 | KD2-H4K8ac_peak_2199 | 7.90806  |                                                      |
| 1 | 162137049 | 1.62E+08 | KD2-H4K8ac_peak_2200 | 4.67342  |                                                      |
| 1 | 162466965 | 1.62E+08 | KD2-H4K8ac_peak_2201 | 6.66359  | UHMK1_ENSG00000152332                                |
| 1 | 162467619 | 1.62E+08 | KD2-H4K8ac_peak_2202 | 24.23147 | UHMK1_ENSG00000152332                                |
| 1 | 162530654 | 1.63E+08 | KD2-H4K8ac_peak_2203 | 24.27967 | RP11-359K18.3_ENSG00000259788;UAP1_ENSG00000117143   |
| 1 | 162531331 | 1.63E+08 | KD2-H4K8ac_peak_2204 | 9.95119  | RP11-359K18.3_ENSG00000259788;UAP1_ENSG00000117143   |
| 1 | 162792168 | 1.63E+08 | KD2-H4K8ac_peak_2205 | 5.85291  |                                                      |
| 1 | 162849968 | 1.63E+08 | KD2-H4K8ac_peak_2206 | 6.7498   |                                                      |

|   |           |          |                      |          |                                                      |
|---|-----------|----------|----------------------|----------|------------------------------------------------------|
| 1 | 162851102 | 1.63E+08 | KD2-H4K8ac_peak_2207 | 17.65594 |                                                      |
| 1 | 162852485 | 1.63E+08 | KD2-H4K8ac_peak_2208 | 6.16883  |                                                      |
| 1 | 162854170 | 1.63E+08 | KD2-H4K8ac_peak_2209 | 8.55271  |                                                      |
| 1 | 162855559 | 1.63E+08 | KD2-H4K8ac_peak_2210 | 8.08678  |                                                      |
| 1 | 162857037 | 1.63E+08 | KD2-H4K8ac_peak_2211 | 11.09936 |                                                      |
| 1 | 162857673 | 1.63E+08 | KD2-H4K8ac_peak_2212 | 18.37277 |                                                      |
| 1 | 162858454 | 1.63E+08 | KD2-H4K8ac_peak_2213 | 9.95759  |                                                      |
| 1 | 162859405 | 1.63E+08 | KD2-H4K8ac_peak_2214 | 7.44324  |                                                      |
| 1 | 162860498 | 1.63E+08 | KD2-H4K8ac_peak_2215 | 13.81781 |                                                      |
| 1 | 162862046 | 1.63E+08 | KD2-H4K8ac_peak_2216 | 5.30799  |                                                      |
| 1 | 162887080 | 1.63E+08 | KD2-H4K8ac_peak_2217 | 19.28826 |                                                      |
| 1 | 162888506 | 1.63E+08 | KD2-H4K8ac_peak_2218 | 14.99434 |                                                      |
| 1 | 162892633 | 1.63E+08 | KD2-H4K8ac_peak_2219 | 5.96443  |                                                      |
| 1 | 162897213 | 1.63E+08 | KD2-H4K8ac_peak_2220 | 10.21366 |                                                      |
| 1 | 163019112 | 1.63E+08 | KD2-H4K8ac_peak_2221 | 12.00273 |                                                      |
| 1 | 163088900 | 1.63E+08 | KD2-H4K8ac_peak_2222 | 9.72244  |                                                      |
| 1 | 163089845 | 1.63E+08 | KD2-H4K8ac_peak_2223 | 5.61377  |                                                      |
| 1 | 163092016 | 1.63E+08 | KD2-H4K8ac_peak_2224 | 7.36799  |                                                      |
| 1 | 163117795 | 1.63E+08 | KD2-H4K8ac_peak_2225 | 12.95073 |                                                      |
| 1 | 163141402 | 1.63E+08 | KD2-H4K8ac_peak_2226 | 4.70206  |                                                      |
| 1 | 163144963 | 1.63E+08 | KD2-H4K8ac_peak_2227 | 7.81699  |                                                      |
| 1 | 163155808 | 1.63E+08 | KD2-H4K8ac_peak_2228 | 4.50891  |                                                      |
| 1 | 163166625 | 1.63E+08 | KD2-H4K8ac_peak_2229 | 9.90914  |                                                      |
| 1 | 163380245 | 1.63E+08 | KD2-H4K8ac_peak_2230 | 9.96798  |                                                      |
| 1 | 163405380 | 1.63E+08 | KD2-H4K8ac_peak_2231 | 6.55628  |                                                      |
| 1 | 163406395 | 1.63E+08 | KD2-H4K8ac_peak_2232 | 10.05606 |                                                      |
| 1 | 163407599 | 1.63E+08 | KD2-H4K8ac_peak_2233 | 7.27716  |                                                      |
| 1 | 163408407 | 1.63E+08 | KD2-H4K8ac_peak_2234 | 10.05606 |                                                      |
| 1 | 163409139 | 1.63E+08 | KD2-H4K8ac_peak_2235 | 8.52559  |                                                      |
| 1 | 163410237 | 1.63E+08 | KD2-H4K8ac_peak_2236 | 7.73418  |                                                      |
| 1 | 163414374 | 1.63E+08 | KD2-H4K8ac_peak_2237 | 5.1313   |                                                      |
| 1 | 163634129 | 1.64E+08 | KD2-H4K8ac_peak_2238 | 4.44527  |                                                      |
| 1 | 164556920 | 1.65E+08 | KD2-H4K8ac_peak_2239 | 10.65982 |                                                      |
| 1 | 164558011 | 1.65E+08 | KD2-H4K8ac_peak_2240 | 10.73134 |                                                      |
| 1 | 164614421 | 1.65E+08 | KD2-H4K8ac_peak_2241 | 6.34074  |                                                      |
| 1 | 164655018 | 1.65E+08 | KD2-H4K8ac_peak_2242 | 4.32338  |                                                      |
| 1 | 164680660 | 1.65E+08 | KD2-H4K8ac_peak_2243 | 14.56495 |                                                      |
| 1 | 164681719 | 1.65E+08 | KD2-H4K8ac_peak_2244 | 6.20982  |                                                      |
| 1 | 164723261 | 1.65E+08 | KD2-H4K8ac_peak_2245 | 8.30974  |                                                      |
| 1 | 165567713 | 1.66E+08 | KD2-H4K8ac_peak_2246 | 8.10216  | RP11-306I1.2_ENSG00000236206                         |
| 1 | 165599719 | 1.66E+08 | KD2-H4K8ac_peak_2247 | 20.42458 | MGST3_ENSG00000143198                                |
| 1 | 165667355 | 1.66E+08 | KD2-H4K8ac_peak_2248 | 10.7186  | ALDH9A1_ENSG00000143149;RP11-466F5.6_ENSG00000215838 |
| 1 | 165668078 | 1.66E+08 | KD2-H4K8ac_peak_2249 | 9.55262  | ALDH9A1_ENSG00000143149;RP11-466F5.6_ENSG00000215838 |
| 1 | 165737709 | 1.66E+08 | KD2-H4K8ac_peak_2250 | 10.53377 | RP11-466F5.8_ENSG00000224358                         |
| 1 | 165738351 | 1.66E+08 | KD2-H4K8ac_peak_2251 | 9.89383  | RP11-466F5.8_ENSG00000224358                         |
| 1 | 165796854 | 1.66E+08 | KD2-H4K8ac_peak_2252 | 16.89963 | TMCO1_ENSG00000143183;UCK2_ENSG00000143179           |

|   |           |          |                      |          |                                                         |
|---|-----------|----------|----------------------|----------|---------------------------------------------------------|
| 1 | 166135654 | 1.66E+08 | KD2-H4K8ac_peak_2253 | 15.81711 | FAM78B_ENSG00000188859                                  |
| 1 | 166320409 | 1.66E+08 | KD2-H4K8ac_peak_2254 | 5.82799  |                                                         |
| 1 | 166808224 | 1.67E+08 | KD2-H4K8ac_peak_2255 | 9.20193  | POGK_ENSG00000143157                                    |
| 1 | 166844957 | 1.67E+08 | KD2-H4K8ac_peak_2256 | 19.28826 | TADA1_ENSG00000152382                                   |
| 1 | 167028248 | 1.67E+08 | KD2-H4K8ac_peak_2257 | 5.20908  |                                                         |
| 1 | 167090607 | 1.67E+08 | KD2-H4K8ac_peak_2258 | 11.02863 |                                                         |
| 1 | 167106784 | 1.67E+08 | KD2-H4K8ac_peak_2259 | 6.27931  |                                                         |
| 1 | 167189069 | 1.67E+08 | KD2-H4K8ac_peak_2260 | 23.04547 | RP11-277B15.3_ENSG00000272205;POU2F1_ENSG00000143190    |
| 1 | 167190307 | 1.67E+08 | KD2-H4K8ac_peak_2261 | 17.27647 | RP11-277B15.3_ENSG00000272205;POU2F1_ENSG00000143190    |
| 1 | 167424031 | 1.67E+08 | KD2-H4K8ac_peak_2262 | 22.62254 |                                                         |
| 1 | 167652222 | 1.68E+08 | KD2-H4K8ac_peak_2263 | 6.66692  |                                                         |
| 1 | 167683692 | 1.68E+08 | KD2-H4K8ac_peak_2264 | 14.03283 |                                                         |
| 1 | 167690339 | 1.68E+08 | KD2-H4K8ac_peak_2265 | 5.13615  | MPZL1_ENSG00000197965                                   |
| 1 | 167691286 | 1.68E+08 | KD2-H4K8ac_peak_2266 | 7.92775  | MPZL1_ENSG00000197965                                   |
| 1 | 167789224 | 1.68E+08 | KD2-H4K8ac_peak_2267 | 8.23274  | RP1-313L4.3_ENSG00000232194;RP1-313L4.4_ENSG00000250762 |
| 1 | 167905537 | 1.68E+08 | KD2-H4K8ac_peak_2268 | 7.49599  | MPC2_ENSG00000143158;DCAF6_ENSG00000143164              |
| 1 | 167905991 | 1.68E+08 | KD2-H4K8ac_peak_2269 | 7.07117  | MPC2_ENSG00000143158;DCAF6_ENSG00000143164              |
| 1 | 168105674 | 1.68E+08 | KD2-H4K8ac_peak_2270 | 8.36432  | GPR161_ENSG00000143147                                  |
| 1 | 168114537 | 1.68E+08 | KD2-H4K8ac_peak_2271 | 8.59579  |                                                         |
| 1 | 168147619 | 1.68E+08 | KD2-H4K8ac_peak_2272 | 5.4779   | TIPRL_ENSG00000143155                                   |
| 1 | 168148207 | 1.68E+08 | KD2-H4K8ac_peak_2273 | 16.49944 | TIPRL_ENSG00000143155                                   |
| 1 | 168194468 | 1.68E+08 | KD2-H4K8ac_peak_2274 | 8.38692  | SFT2D2_ENSG00000213064                                  |
| 1 | 168195286 | 1.68E+08 | KD2-H4K8ac_peak_2275 | 8.63033  | SFT2D2_ENSG00000213064                                  |
| 1 | 168356443 | 1.68E+08 | KD2-H4K8ac_peak_2276 | 9.9363   |                                                         |
| 1 | 168408728 | 1.68E+08 | KD2-H4K8ac_peak_2277 | 9.36516  |                                                         |
| 1 | 168436029 | 1.68E+08 | KD2-H4K8ac_peak_2278 | 6.85193  |                                                         |
| 1 | 168440404 | 1.68E+08 | KD2-H4K8ac_peak_2279 | 7.27716  |                                                         |
| 1 | 168582479 | 1.69E+08 | KD2-H4K8ac_peak_2280 | 5.01002  |                                                         |
| 1 | 168607678 | 1.69E+08 | KD2-H4K8ac_peak_2281 | 6.61376  |                                                         |
| 1 | 168658902 | 1.69E+08 | KD2-H4K8ac_peak_2282 | 16.61426 |                                                         |
| 1 | 168660247 | 1.69E+08 | KD2-H4K8ac_peak_2283 | 9.90914  |                                                         |
| 1 | 168664995 | 1.69E+08 | KD2-H4K8ac_peak_2284 | 5.9696   |                                                         |
| 1 | 168706651 | 1.69E+08 | KD2-H4K8ac_peak_2285 | 5.88845  |                                                         |
| 1 | 168725134 | 1.69E+08 | KD2-H4K8ac_peak_2286 | 5.14125  |                                                         |
| 1 | 168909744 | 1.69E+08 | KD2-H4K8ac_peak_2287 | 9.40857  |                                                         |
| 1 | 169055191 | 1.69E+08 | KD2-H4K8ac_peak_2288 | 5.82799  | LINC00970_ENSG00000203601                               |
| 1 | 169057003 | 1.69E+08 | KD2-H4K8ac_peak_2289 | 5.18553  | LINC00970_ENSG00000203601                               |
| 1 | 169074199 | 1.69E+08 | KD2-H4K8ac_peak_2290 | 21.09086 | RP5-1018K9.1_ENSG00000237707;ATP1B1_ENSG00000143153     |
| 1 | 169076007 | 1.69E+08 | KD2-H4K8ac_peak_2291 | 8.25809  |                                                         |
| 1 | 169306293 | 1.69E+08 | KD2-H4K8ac_peak_2292 | 4.37815  |                                                         |
| 1 | 169396818 | 1.69E+08 | KD2-H4K8ac_peak_2293 | 8.30974  |                                                         |
| 1 | 169397862 | 1.69E+08 | KD2-H4K8ac_peak_2294 | 6.51023  |                                                         |
| 1 | 169763309 | 1.7E+08  | KD2-H4K8ac_peak_2295 | 17.67328 | METTL18_ENSG00000171806                                 |
| 1 | 169862423 | 1.7E+08  | KD2-H4K8ac_peak_2296 | 10.35678 | SCYL3_ENSG00000000457                                   |
| 1 | 169882489 | 1.7E+08  | KD2-H4K8ac_peak_2297 | 4.62507  |                                                         |
| 1 | 170043441 | 1.7E+08  | KD2-H4K8ac_peak_2298 | 8.2413   |                                                         |

|   |           |          |                      |          |                                                        |
|---|-----------|----------|----------------------|----------|--------------------------------------------------------|
| 1 | 170500270 | 1.71E+08 | KD2-H4K8ac_peak_2299 | 9.1707   | GORAB_ENSG00000120370                                  |
| 1 | 170500993 | 1.71E+08 | KD2-H4K8ac_peak_2300 | 7.76329  | RP11-576I22.2_ENSG00000231407;GORAB_ENSG00000120370    |
| 1 | 171342773 | 1.71E+08 | KD2-H4K8ac_peak_2301 | 6.16888  |                                                        |
| 1 | 171454820 | 1.71E+08 | KD2-H4K8ac_peak_2302 | 6.84261  | PRRC2C_ENSG00000117523                                 |
| 1 | 171614294 | 1.72E+08 | KD2-H4K8ac_peak_2303 | 9.67696  |                                                        |
| 1 | 171710763 | 1.72E+08 | KD2-H4K8ac_peak_2304 | 10.29842 | VAMP4_ENSG00000117533                                  |
| 1 | 171711342 | 1.72E+08 | KD2-H4K8ac_peak_2305 | 6.8713   | VAMP4_ENSG00000117533                                  |
| 1 | 171749879 | 1.72E+08 | KD2-H4K8ac_peak_2306 | 11.08187 | METTL13_ENSG00000010165                                |
| 1 | 171810241 | 1.72E+08 | KD2-H4K8ac_peak_2307 | 5.01002  | DNM3_ENSG00000197959                                   |
| 1 | 171811594 | 1.72E+08 | KD2-H4K8ac_peak_2308 | 4.49003  | DNM3_ENSG00000197959                                   |
| 1 | 171868114 | 1.72E+08 | KD2-H4K8ac_peak_2309 | 7.47462  |                                                        |
| 1 | 171974596 | 1.72E+08 | KD2-H4K8ac_peak_2310 | 5.73839  |                                                        |
| 1 | 172113512 | 1.72E+08 | KD2-H4K8ac_peak_2311 | 11.50346 | DNM3OS_ENSG00000230630;MIR199A2_ENSG00000208024        |
| 1 | 172133463 | 1.72E+08 | KD2-H4K8ac_peak_2312 | 4.54006  |                                                        |
| 1 | 172291373 | 1.72E+08 | KD2-H4K8ac_peak_2313 | 5.14125  |                                                        |
| 1 | 172327185 | 1.72E+08 | KD2-H4K8ac_peak_2314 | 7.38933  |                                                        |
| 1 | 172412827 | 1.72E+08 | KD2-H4K8ac_peak_2315 | 21.09086 | PIGC_ENSG00000135845                                   |
| 1 | 172419288 | 1.72E+08 | KD2-H4K8ac_peak_2316 | 16.49944 |                                                        |
| 1 | 172466535 | 1.72E+08 | KD2-H4K8ac_peak_2317 | 4.211    |                                                        |
| 1 | 172501205 | 1.73E+08 | KD2-H4K8ac_peak_2318 | 7.58939  | SUCO_ENSG00000094975                                   |
| 1 | 172502261 | 1.73E+08 | KD2-H4K8ac_peak_2319 | 11.04256 | SUCO_ENSG00000094975                                   |
| 1 | 173445866 | 1.73E+08 | KD2-H4K8ac_peak_2320 | 6.65673  | PRDX6_ENSG00000117592                                  |
| 1 | 173446708 | 1.73E+08 | KD2-H4K8ac_peak_2321 | 9.87655  | PRDX6_ENSG00000117592                                  |
| 1 | 173638666 | 1.74E+08 | KD2-H4K8ac_peak_2322 | 3.82059  | ANKRD45_ENSG00000183831                                |
| 1 | 173683331 | 1.74E+08 | KD2-H4K8ac_peak_2323 | 17.8868  | KLHL20_ENSG00000076321                                 |
| 1 | 173793151 | 1.74E+08 | KD2-H4K8ac_peak_2324 | 4.44527  | CENPL_ENSG00000120334;DARS2_ENSG00000117593            |
| 1 | 173793885 | 1.74E+08 | KD2-H4K8ac_peak_2325 | 8.55271  | CENPL_ENSG00000120334;DARS2_ENSG00000117593            |
| 1 | 173837458 | 1.74E+08 | KD2-H4K8ac_peak_2326 | 14.43794 | GAS5_ENSG00000234741;ZBTB37_ENSG00000185278            |
| 1 | 173991142 | 1.74E+08 | KD2-H4K8ac_peak_2327 | 9.65086  | RC3H1_ENSG00000135870;RP11-160H22.3_ENSG00000224977    |
| 1 | 173991665 | 1.74E+08 | KD2-H4K8ac_peak_2328 | 11.92978 | RC3H1_ENSG00000135870;RP11-160H22.3_ENSG00000224977    |
| 1 | 174127904 | 1.74E+08 | KD2-H4K8ac_peak_2329 | 9.96798  | RP11-160H22.5_ENSG00000227373;RABGAP1L_ENSG00000152061 |
| 1 | 174128663 | 1.74E+08 | KD2-H4K8ac_peak_2330 | 15.66774 | RP11-160H22.5_ENSG00000227373;RABGAP1L_ENSG00000152061 |
| 1 | 174967855 | 1.75E+08 | KD2-H4K8ac_peak_2331 | 12.69561 | CACYBP_ENSG00000116161                                 |
| 1 | 174969141 | 1.75E+08 | KD2-H4K8ac_peak_2332 | 11.50346 | CACYBP_ENSG00000116161                                 |
| 1 | 174992290 | 1.75E+08 | KD2-H4K8ac_peak_2333 | 11.66477 | MRPS14_ENSG00000120333;Y_RNA_ENSG00000206659           |
| 1 | 174998253 | 1.75E+08 | KD2-H4K8ac_peak_2334 | 7.8711   |                                                        |
| 1 | 175161600 | 1.75E+08 | KD2-H4K8ac_peak_2335 | 14.00658 | KIAA0040_ENSG00000235750                               |
| 1 | 175482599 | 1.75E+08 | KD2-H4K8ac_peak_2336 | 6.35843  |                                                        |
| 1 | 175484471 | 1.75E+08 | KD2-H4K8ac_peak_2337 | 7.14562  |                                                        |
| 1 | 175687551 | 1.76E+08 | KD2-H4K8ac_peak_2338 | 7.13615  |                                                        |
| 1 | 175850621 | 1.76E+08 | KD2-H4K8ac_peak_2339 | 5.61067  |                                                        |
| 1 | 175856688 | 1.76E+08 | KD2-H4K8ac_peak_2340 | 6.05809  |                                                        |
| 1 | 176175878 | 1.76E+08 | KD2-H4K8ac_peak_2341 | 13.95627 | RFWD2_ENSG00000143207;RP11-195C7.1_ENSG00000236021     |
| 1 | 176685858 | 1.77E+08 | KD2-H4K8ac_peak_2342 | 3.75035  |                                                        |
| 1 | 177133621 | 1.77E+08 | KD2-H4K8ac_peak_2343 | 6.66692  | ASTN1_ENSG00000152092                                  |
| 1 | 177150501 | 1.77E+08 | KD2-H4K8ac_peak_2344 | 6.05809  |                                                        |

|   |           |          |                      |          |                                                        |
|---|-----------|----------|----------------------|----------|--------------------------------------------------------|
| 1 | 178501672 | 1.79E+08 | KD2-H4K8ac_peak_2345 | 14.69247 |                                                        |
| 1 | 178510436 | 1.79E+08 | KD2-H4K8ac_peak_2346 | 18.37277 | C1orf220_ENSG00000213057;C1ORF220_ENSG00000184909      |
| 1 | 178693832 | 1.79E+08 | KD2-H4K8ac_peak_2347 | 19.67275 | RALGPS2_ENSG00000116191                                |
| 1 | 178694709 | 1.79E+08 | KD2-H4K8ac_peak_2348 | 11.92978 | RP11-428K3.1_ENSG00000273062;RALGPS2_ENSG00000116191   |
| 1 | 178954774 | 1.79E+08 | KD2-H4K8ac_peak_2349 | 6.16888  |                                                        |
| 1 | 178971536 | 1.79E+08 | KD2-H4K8ac_peak_2350 | 6.99194  |                                                        |
| 1 | 178994531 | 1.79E+08 | KD2-H4K8ac_peak_2351 | 9.36516  | FAM20B_ENSG00000116199                                 |
| 1 | 178995170 | 1.79E+08 | KD2-H4K8ac_peak_2352 | 15.40925 | FAM20B_ENSG00000116199                                 |
| 1 | 179005048 | 1.79E+08 | KD2-H4K8ac_peak_2353 | 9.26823  | RP11-177A2.5_ENSG00000232750                           |
| 1 | 179007225 | 1.79E+08 | KD2-H4K8ac_peak_2354 | 6.25869  |                                                        |
| 1 | 179050673 | 1.79E+08 | KD2-H4K8ac_peak_2355 | 6.99815  | TOR3A_ENSG00000186283                                  |
| 1 | 179051151 | 1.79E+08 | KD2-H4K8ac_peak_2356 | 17.65612 | TOR3A_ENSG00000186283                                  |
| 1 | 179060329 | 1.79E+08 | KD2-H4K8ac_peak_2357 | 11.31076 |                                                        |
| 1 | 179198399 | 1.79E+08 | KD2-H4K8ac_peak_2358 | 11.50346 | ABL2_ENSG00000143322                                   |
| 1 | 179199058 | 1.79E+08 | KD2-H4K8ac_peak_2359 | 11.24702 | ABL2_ENSG00000143322                                   |
| 1 | 179262510 | 1.79E+08 | KD2-H4K8ac_peak_2360 | 12.84642 | SOAT1_ENSG00000057252                                  |
| 1 | 179262975 | 1.79E+08 | KD2-H4K8ac_peak_2361 | 13.13969 | SOAT1_ENSG00000057252                                  |
| 1 | 179334464 | 1.79E+08 | KD2-H4K8ac_peak_2362 | 7.62396  | AXDND1_ENSG00000162779                                 |
| 1 | 179555343 | 1.8E+08  | KD2-H4K8ac_peak_2363 | 9.26408  | RP11-545A16.3_ENSG00000227141                          |
| 1 | 179560630 | 1.8E+08  | KD2-H4K8ac_peak_2364 | 12.30509 | TDRD5_ENSG00000162782                                  |
| 1 | 179711750 | 1.8E+08  | KD2-H4K8ac_peak_2365 | 28.49742 | FAM163A_ENSG00000143340                                |
| 1 | 179715725 | 1.8E+08  | KD2-H4K8ac_peak_2366 | 6.49399  |                                                        |
| 1 | 179723842 | 1.8E+08  | KD2-H4K8ac_peak_2367 | 8.79106  |                                                        |
| 1 | 179729646 | 1.8E+08  | KD2-H4K8ac_peak_2368 | 5.30799  |                                                        |
| 1 | 179731545 | 1.8E+08  | KD2-H4K8ac_peak_2369 | 8.40646  |                                                        |
| 1 | 179735037 | 1.8E+08  | KD2-H4K8ac_peak_2370 | 9.11876  |                                                        |
| 1 | 179749598 | 1.8E+08  | KD2-H4K8ac_peak_2371 | 6.25869  |                                                        |
| 1 | 179750650 | 1.8E+08  | KD2-H4K8ac_peak_2372 | 10.87173 |                                                        |
| 1 | 179751532 | 1.8E+08  | KD2-H4K8ac_peak_2373 | 34.98954 |                                                        |
| 1 | 179753202 | 1.8E+08  | KD2-H4K8ac_peak_2374 | 10.19949 |                                                        |
| 1 | 179755092 | 1.8E+08  | KD2-H4K8ac_peak_2375 | 17.10757 |                                                        |
| 1 | 179756754 | 1.8E+08  | KD2-H4K8ac_peak_2376 | 17.46525 |                                                        |
| 1 | 179757854 | 1.8E+08  | KD2-H4K8ac_peak_2377 | 17.67328 |                                                        |
| 1 | 179758389 | 1.8E+08  | KD2-H4K8ac_peak_2378 | 8.7497   |                                                        |
| 1 | 179764067 | 1.8E+08  | KD2-H4K8ac_peak_2379 | 7.74292  |                                                        |
| 1 | 179766085 | 1.8E+08  | KD2-H4K8ac_peak_2380 | 5.13476  |                                                        |
| 1 | 179786430 | 1.8E+08  | KD2-H4K8ac_peak_2381 | 5.54647  | RP11-12M5.3_ENSG00000229407                            |
| 1 | 179850957 | 1.8E+08  | KD2-H4K8ac_peak_2382 | 20.90514 | RP11-533E19.7_ENSG00000272906;TOR1AIP1_ENSG00000143337 |
| 1 | 179922392 | 1.8E+08  | KD2-H4K8ac_peak_2383 | 7.76329  | RP11-533E19.5_ENSG00000260360                          |
| 1 | 179922928 | 1.8E+08  | KD2-H4K8ac_peak_2384 | 6.25869  | RP11-533E19.5_ENSG00000260360;CEP350_ENSG00000135837   |
| 1 | 179923980 | 1.8E+08  | KD2-H4K8ac_peak_2385 | 10.09705 | RP11-533E19.5_ENSG00000260360;CEP350_ENSG00000135837   |
| 1 | 180123251 | 1.8E+08  | KD2-H4K8ac_peak_2386 | 3.82395  | QSOX1_ENSG00000116260                                  |
| 1 | 180124251 | 1.8E+08  | KD2-H4K8ac_peak_2387 | 10.21366 | QSOX1_ENSG00000116260                                  |
| 1 | 180180819 | 1.8E+08  | KD2-H4K8ac_peak_2388 | 6.66692  |                                                        |
| 1 | 180471194 | 1.8E+08  | KD2-H4K8ac_peak_2389 | 10.13704 | ACBD6_ENSG00000135847                                  |
| 1 | 180564272 | 1.81E+08 | KD2-H4K8ac_peak_2390 | 6.30229  |                                                        |



|   |           |          |                      |          |                                               |
|---|-----------|----------|----------------------|----------|-----------------------------------------------|
| 1 | 180893346 | 1.81E+08 | KD2-H4K8ac_peak_2391 | 6.66359  |                                               |
| 1 | 180894606 | 1.81E+08 | KD2-H4K8ac_peak_2392 | 26.75898 |                                               |
| 1 | 180895975 | 1.81E+08 | KD2-H4K8ac_peak_2393 | 23.97836 |                                               |
| 1 | 180898037 | 1.81E+08 | KD2-H4K8ac_peak_2394 | 12.49757 |                                               |
| 1 | 180898780 | 1.81E+08 | KD2-H4K8ac_peak_2395 | 12.08081 |                                               |
| 1 | 180900267 | 1.81E+08 | KD2-H4K8ac_peak_2396 | 8.16906  |                                               |
| 1 | 180902386 | 1.81E+08 | KD2-H4K8ac_peak_2397 | 7.20567  |                                               |
| 1 | 180991457 | 1.81E+08 | KD2-H4K8ac_peak_2398 | 9.63487  | STX6_ENSG00000135823                          |
| 1 | 181057344 | 1.81E+08 | KD2-H4K8ac_peak_2399 | 11.09936 | IER5_ENSG00000162783                          |
| 1 | 181058082 | 1.81E+08 | KD2-H4K8ac_peak_2400 | 4.70206  | IER5_ENSG00000162783                          |
| 1 | 181058499 | 1.81E+08 | KD2-H4K8ac_peak_2401 | 8.85813  | IER5_ENSG00000162783                          |
| 1 | 181073938 | 1.81E+08 | KD2-H4K8ac_peak_2402 | 31.14568 |                                               |
| 1 | 181074801 | 1.81E+08 | KD2-H4K8ac_peak_2403 | 13.3695  |                                               |
| 1 | 181082363 | 1.81E+08 | KD2-H4K8ac_peak_2404 | 6.65673  |                                               |
| 1 | 181097669 | 1.81E+08 | KD2-H4K8ac_peak_2405 | 19.28826 |                                               |
| 1 | 181103957 | 1.81E+08 | KD2-H4K8ac_peak_2406 | 11.92978 |                                               |
| 1 | 181121457 | 1.81E+08 | KD2-H4K8ac_peak_2407 | 4.49003  |                                               |
| 1 | 181122065 | 1.81E+08 | KD2-H4K8ac_peak_2408 | 8.21852  |                                               |
| 1 | 181135355 | 1.81E+08 | KD2-H4K8ac_peak_2409 | 9.16531  |                                               |
| 1 | 181149402 | 1.81E+08 | KD2-H4K8ac_peak_2410 | 4.54729  |                                               |
| 1 | 181998983 | 1.82E+08 | KD2-H4K8ac_peak_2411 | 4.27244  |                                               |
| 1 | 182030697 | 1.82E+08 | KD2-H4K8ac_peak_2412 | 4.211    | ZNF648_ENSG00000179930                        |
| 1 | 182054354 | 1.82E+08 | KD2-H4K8ac_peak_2413 | 6.67092  |                                               |
| 1 | 182112915 | 1.82E+08 | KD2-H4K8ac_peak_2414 | 9.07715  |                                               |
| 1 | 182198096 | 1.82E+08 | KD2-H4K8ac_peak_2415 | 8.55271  |                                               |
| 1 | 182269310 | 1.82E+08 | KD2-H4K8ac_peak_2416 | 6.66692  |                                               |
| 1 | 182360210 | 1.82E+08 | KD2-H4K8ac_peak_2417 | 12.13241 |                                               |
| 1 | 182361158 | 1.82E+08 | KD2-H4K8ac_peak_2418 | 22.92963 |                                               |
| 1 | 182570728 | 1.83E+08 | KD2-H4K8ac_peak_2419 | 9.08816  |                                               |
| 1 | 182573184 | 1.83E+08 | KD2-H4K8ac_peak_2420 | 6.40297  | RGS16_ENSG00000143333                         |
| 1 | 182583745 | 1.83E+08 | KD2-H4K8ac_peak_2421 | 13.97093 | RP11-317P15.4_ENSG00000261504                 |
| 1 | 182585305 | 1.83E+08 | KD2-H4K8ac_peak_2422 | 8.16906  | RP11-317P15.4_ENSG00000261504                 |
| 1 | 182598926 | 1.83E+08 | KD2-H4K8ac_peak_2423 | 6.48071  |                                               |
| 1 | 182602729 | 1.83E+08 | KD2-H4K8ac_peak_2424 | 6.7498   |                                               |
| 1 | 182669110 | 1.83E+08 | KD2-H4K8ac_peak_2425 | 5.98071  |                                               |
| 1 | 182758477 | 1.83E+08 | KD2-H4K8ac_peak_2426 | 12.08081 | NPL_ENSG00000135838                           |
| 1 | 182808076 | 1.83E+08 | KD2-H4K8ac_peak_2427 | 8.79106  | DHX9_ENSG00000135829                          |
| 1 | 182808517 | 1.83E+08 | KD2-H4K8ac_peak_2428 | 12.08081 | DHX9_ENSG00000135829                          |
| 1 | 182991647 | 1.83E+08 | KD2-H4K8ac_peak_2429 | 28.03233 | LAMC1_ENSG00000135862                         |
| 1 | 183285406 | 1.83E+08 | KD2-H4K8ac_peak_2430 | 5.405    |                                               |
| 1 | 183440439 | 1.83E+08 | KD2-H4K8ac_peak_2431 | 29.92854 | SMG7-AS1_ENSG00000232860;SMG7_ENSG00000116698 |
| 1 | 183441642 | 1.83E+08 | KD2-H4K8ac_peak_2432 | 15.66774 | SMG7-AS1_ENSG00000232860;SMG7_ENSG00000116698 |
| 1 | 183578314 | 1.84E+08 | KD2-H4K8ac_peak_2433 | 10.02431 |                                               |
| 1 | 183604327 | 1.84E+08 | KD2-H4K8ac_peak_2434 | 10.43145 | ARPC5_ENSG00000162704                         |
| 1 | 183774071 | 1.84E+08 | KD2-H4K8ac_peak_2435 | 4.44527  |                                               |
| 1 | 183813029 | 1.84E+08 | KD2-H4K8ac_peak_2436 | 8.30974  |                                               |

|   |           |          |                      |          |                                                       |
|---|-----------|----------|----------------------|----------|-------------------------------------------------------|
| 1 | 184006038 | 1.84E+08 | KD2-H4K8ac_peak_2437 | 7.57336  | COLGALT2_ENSG00000198756                              |
| 1 | 184020245 | 1.84E+08 | KD2-H4K8ac_peak_2438 | 7.40373  | TSEN15_ENSG00000198860                                |
| 1 | 184020882 | 1.84E+08 | KD2-H4K8ac_peak_2439 | 6.08439  | TSEN15_ENSG00000198860                                |
| 1 | 184355145 | 1.84E+08 | KD2-H4K8ac_peak_2440 | 7.76104  | RP11-382D12.2_ENSG00000271387;C1orf21_ENSG00000116667 |
| 1 | 184356266 | 1.84E+08 | KD2-H4K8ac_peak_2441 | 8.2413   | RP11-382D12.2_ENSG00000271387;C1orf21_ENSG00000116667 |
| 1 | 184591811 | 1.85E+08 | KD2-H4K8ac_peak_2442 | 6.66692  |                                                       |
| 1 | 184653790 | 1.85E+08 | KD2-H4K8ac_peak_2443 | 6.40683  |                                                       |
| 1 | 184723385 | 1.85E+08 | KD2-H4K8ac_peak_2444 | 6.40874  | EDEM3_ENSG00000116406                                 |
| 1 | 184942752 | 1.85E+08 | KD2-H4K8ac_peak_2445 | 8.16906  | FAM129A_ENSG00000135842                               |
| 1 | 185014115 | 1.85E+08 | KD2-H4K8ac_peak_2446 | 10.19949 | RNF2_ENSG00000121481                                  |
| 1 | 185014707 | 1.85E+08 | KD2-H4K8ac_peak_2447 | 8.4716   | RNF2_ENSG00000121481                                  |
| 1 | 185125407 | 1.85E+08 | KD2-H4K8ac_peak_2448 | 26.47675 | TRMT1L_ENSG00000121486;SWT1_ENSG00000116668           |
| 1 | 185126391 | 1.85E+08 | KD2-H4K8ac_peak_2449 | 8.86099  | TRMT1L_ENSG00000121486;SWT1_ENSG00000116668           |
| 1 | 185226097 | 1.85E+08 | KD2-H4K8ac_peak_2450 | 16.25886 | Y_RNA_ENSG00000206640                                 |
| 1 | 185226561 | 1.85E+08 | KD2-H4K8ac_peak_2451 | 16.71655 | Y_RNA_ENSG00000206640                                 |
| 1 | 185285516 | 1.85E+08 | KD2-H4K8ac_peak_2452 | 21.11201 | IVNS1ABP_ENSG00000116679;GS1-279B7.2_ENSG00000273004  |
| 1 | 185286694 | 1.85E+08 | KD2-H4K8ac_peak_2453 | 6.8713   | IVNS1ABP_ENSG00000116679;GS1-279B7.2_ENSG00000273004  |
| 1 | 185703516 | 1.86E+08 | KD2-H4K8ac_peak_2454 | 8.26945  | HMCN1_ENSG00000143341                                 |
| 1 | 186343961 | 1.86E+08 | KD2-H4K8ac_peak_2455 | 12.23    | TPR_ENSG00000047410;C1orf27_ENSG00000157181           |
| 1 | 186344618 | 1.86E+08 | KD2-H4K8ac_peak_2456 | 12.30509 | TPR_ENSG00000047410;C1orf27_ENSG00000157181           |
| 1 | 187246280 | 1.87E+08 | KD2-H4K8ac_peak_2457 | 5.57044  |                                                       |
| 1 | 187518090 | 1.88E+08 | KD2-H4K8ac_peak_2458 | 5.75452  |                                                       |
| 1 | 188355721 | 1.88E+08 | KD2-H4K8ac_peak_2459 | 16.94317 |                                                       |
| 1 | 190256208 | 1.9E+08  | KD2-H4K8ac_peak_2460 | 4.37708  |                                                       |
| 1 | 192777690 | 1.93E+08 | KD2-H4K8ac_peak_2461 | 9.69846  | RGS2_ENSG00000116741                                  |
| 1 | 192803659 | 1.93E+08 | KD2-H4K8ac_peak_2462 | 5.96828  |                                                       |
| 1 | 192816998 | 1.93E+08 | KD2-H4K8ac_peak_2463 | 7.13615  |                                                       |
| 1 | 193028144 | 1.93E+08 | KD2-H4K8ac_peak_2464 | 7.73264  | UCHL5_ENSG00000116750;TROVE2_ENSG00000116747          |
| 1 | 193028825 | 1.93E+08 | KD2-H4K8ac_peak_2465 | 8.16906  | UCHL5_ENSG00000116750;TROVE2_ENSG00000116747          |
| 1 | 193090596 | 1.93E+08 | KD2-H4K8ac_peak_2466 | 9.90914  | CDC73_ENSG00000134371                                 |
| 1 | 193091207 | 1.93E+08 | KD2-H4K8ac_peak_2467 | 11.66477 | CDC73_ENSG00000134371                                 |
| 1 | 196317826 | 1.96E+08 | KD2-H4K8ac_peak_2468 | 6.37652  |                                                       |
| 1 | 196577069 | 1.97E+08 | KD2-H4K8ac_peak_2469 | 5.58324  | KCNT2_ENSG00000162687                                 |
| 1 | 196577665 | 1.97E+08 | KD2-H4K8ac_peak_2470 | 9.26408  | KCNT2_ENSG00000162687                                 |
| 1 | 196866446 | 1.97E+08 | KD2-H4K8ac_peak_2471 | 7.76329  |                                                       |
| 1 | 197116539 | 1.97E+08 | KD2-H4K8ac_peak_2472 | 7.82935  | ASPM_ENSG00000066279                                  |
| 1 | 197170133 | 1.97E+08 | KD2-H4K8ac_peak_2473 | 14.43794 | ZBTB41_ENSG00000177888;CRB1_ENSG00000134376           |
| 1 | 197406275 | 1.97E+08 | KD2-H4K8ac_peak_2474 | 6.47635  |                                                       |
| 1 | 197409812 | 1.97E+08 | KD2-H4K8ac_peak_2475 | 6.75638  |                                                       |
| 1 | 197416205 | 1.97E+08 | KD2-H4K8ac_peak_2476 | 5.86783  | RP11-75C23.1_ENSG00000230260                          |
| 1 | 197653980 | 1.98E+08 | KD2-H4K8ac_peak_2477 | 11.92978 | Y_RNA_ENSG00000207139                                 |
| 1 | 197743904 | 1.98E+08 | KD2-H4K8ac_peak_2478 | 14.84673 | DENND1B_ENSG00000213047                               |
| 1 | 197870912 | 1.98E+08 | KD2-H4K8ac_peak_2479 | 20.48577 | C1orf53_ENSG00000203724                               |
| 1 | 198126346 | 1.98E+08 | KD2-H4K8ac_peak_2480 | 10.52259 | NEK7_ENSG00000151414                                  |
| 1 | 198127903 | 1.98E+08 | KD2-H4K8ac_peak_2481 | 4.86324  |                                                       |
| 1 | 198174262 | 1.98E+08 | KD2-H4K8ac_peak_2482 | 5.43522  |                                                       |

|   |           |          |                      |          |                                                    |
|---|-----------|----------|----------------------|----------|----------------------------------------------------|
| 1 | 198619620 | 1.99E+08 | KD2-H4K8ac_peak_2483 | 3.75035  |                                                    |
| 1 | 198627051 | 1.99E+08 | KD2-H4K8ac_peak_2484 | 5.88845  |                                                    |
| 1 | 198872242 | 1.99E+08 | KD2-H4K8ac_peak_2485 | 4.66652  |                                                    |
| 1 | 199053466 | 1.99E+08 | KD2-H4K8ac_peak_2486 | 5.14125  |                                                    |
| 1 | 199321537 | 1.99E+08 | KD2-H4K8ac_peak_2487 | 5.3778   |                                                    |
| 1 | 199562647 | 2E+08    | KD2-H4K8ac_peak_2488 | 4.37709  |                                                    |
| 1 | 199585189 | 2E+08    | KD2-H4K8ac_peak_2489 | 11.05407 | AL450244.1_ENSG00000263805                         |
| 1 | 199588223 | 2E+08    | KD2-H4K8ac_peak_2490 | 5.91443  |                                                    |
| 1 | 200271398 | 2E+08    | KD2-H4K8ac_peak_2491 | 9.65086  |                                                    |
| 1 | 200332469 | 2E+08    | KD2-H4K8ac_peak_2492 | 5.88845  |                                                    |
| 1 | 200378738 | 2E+08    | KD2-H4K8ac_peak_2493 | 19.72564 | ZNF281_ENSG00000162702                             |
| 1 | 200379339 | 2E+08    | KD2-H4K8ac_peak_2494 | 6.40297  | ZNF281_ENSG00000162702                             |
| 1 | 200433985 | 2E+08    | KD2-H4K8ac_peak_2495 | 5.88845  |                                                    |
| 1 | 200442007 | 2E+08    | KD2-H4K8ac_peak_2496 | 6.1228   | RP11-469A15.2_ENSG00000230623                      |
| 1 | 200442706 | 2E+08    | KD2-H4K8ac_peak_2497 | 6.66692  | RP11-469A15.2_ENSG00000230623                      |
| 1 | 200589554 | 2.01E+08 | KD2-H4K8ac_peak_2498 | 11.04256 | KIF14_ENSG00000118193                              |
| 1 | 200638616 | 2.01E+08 | KD2-H4K8ac_peak_2499 | 28.66603 | DDX59_ENSG00000118197;RP11-92G12.3_ENSG00000260088 |
| 1 | 200708140 | 2.01E+08 | KD2-H4K8ac_peak_2500 | 12.84642 | CAMSAP2_ENSG00000118200                            |
| 1 | 200860134 | 2.01E+08 | KD2-H4K8ac_peak_2501 | 21.57439 | C1orf106_ENSG00000163362                           |
| 1 | 201083074 | 2.01E+08 | KD2-H4K8ac_peak_2502 | 24.80313 |                                                    |
| 1 | 201123015 | 2.01E+08 | KD2-H4K8ac_peak_2503 | 11.3923  |                                                    |
| 1 | 201123784 | 2.01E+08 | KD2-H4K8ac_peak_2504 | 32.88903 |                                                    |
| 1 | 201140206 | 2.01E+08 | KD2-H4K8ac_peak_2505 | 13.87818 | TMEM9_ENSG00000116857                              |
| 1 | 201238277 | 2.01E+08 | KD2-H4K8ac_peak_2506 | 4.03256  |                                                    |
| 1 | 201405481 | 2.01E+08 | KD2-H4K8ac_peak_2507 | 5.02474  |                                                    |
| 1 | 201419812 | 2.01E+08 | KD2-H4K8ac_peak_2508 | 13.87818 |                                                    |
| 1 | 201437295 | 2.01E+08 | KD2-H4K8ac_peak_2509 | 19.35756 | PHLDA3_ENSG00000174307                             |
| 1 | 201451413 | 2.01E+08 | KD2-H4K8ac_peak_2510 | 16.07478 |                                                    |
| 1 | 201475930 | 2.01E+08 | KD2-H4K8ac_peak_2511 | 8.36432  | RP11-134G8.7_ENSG00000224536                       |
| 1 | 201508407 | 2.02E+08 | KD2-H4K8ac_peak_2512 | 7.43893  |                                                    |
| 1 | 201528522 | 2.02E+08 | KD2-H4K8ac_peak_2513 | 9.08816  |                                                    |
| 1 | 201617897 | 2.02E+08 | KD2-H4K8ac_peak_2514 | 3.83717  |                                                    |
| 1 | 201619162 | 2.02E+08 | KD2-H4K8ac_peak_2515 | 7.90806  |                                                    |
| 1 | 201664989 | 2.02E+08 | KD2-H4K8ac_peak_2516 | 6.62457  |                                                    |
| 1 | 201708699 | 2.02E+08 | KD2-H4K8ac_peak_2517 | 9.41619  |                                                    |
| 1 | 201798331 | 2.02E+08 | KD2-H4K8ac_peak_2518 | 14.27217 | IPO9-AS1_ENSG00000231871;IPO9_ENSG00000198700      |
| 1 | 201857288 | 2.02E+08 | KD2-H4K8ac_peak_2519 | 13.3695  | SHISA4_ENSG00000198892                             |
| 1 | 201915174 | 2.02E+08 | KD2-H4K8ac_peak_2520 | 6.36375  | LMOD1_ENSG00000163431                              |
| 1 | 201923924 | 2.02E+08 | KD2-H4K8ac_peak_2521 | 9.96798  | TIMM17A_ENSG00000134375                            |
| 1 | 201924710 | 2.02E+08 | KD2-H4K8ac_peak_2522 | 9.357    | TIMM17A_ENSG00000134375                            |
| 1 | 201951443 | 2.02E+08 | KD2-H4K8ac_peak_2523 | 18.41034 | RNPEP_ENSG00000176393                              |
| 1 | 202092051 | 2.02E+08 | KD2-H4K8ac_peak_2524 | 6.99194  | GPR37L1_ENSG00000170075                            |
| 1 | 202113113 | 2.02E+08 | KD2-H4K8ac_peak_2525 | 11.379   | ARL8A_ENSG00000143862                              |
| 1 | 202113918 | 2.02E+08 | KD2-H4K8ac_peak_2526 | 19.3691  | ARL8A_ENSG00000143862                              |
| 1 | 202124178 | 2.02E+08 | KD2-H4K8ac_peak_2527 | 3.97079  |                                                    |
| 1 | 202132190 | 2.02E+08 | KD2-H4K8ac_peak_2528 | 5.9696   |                                                    |

|   |           |          |                      |          |                                                             |
|---|-----------|----------|----------------------|----------|-------------------------------------------------------------|
| 1 | 202136670 | 2.02E+08 | KD2-H4K8ac_peak_2529 | 10.32481 | PTPRVP_ENSG00000243323                                      |
| 1 | 202137661 | 2.02E+08 | KD2-H4K8ac_peak_2530 | 6.59798  | PTPRVP_ENSG00000243323                                      |
| 1 | 202183166 | 2.02E+08 | KD2-H4K8ac_peak_2531 | 10.43145 |                                                             |
| 1 | 202206035 | 2.02E+08 | KD2-H4K8ac_peak_2532 | 12.43831 |                                                             |
| 1 | 202273052 | 2.02E+08 | KD2-H4K8ac_peak_2533 | 7.49599  |                                                             |
| 1 | 202310787 | 2.02E+08 | KD2-H4K8ac_peak_2534 | 11.05467 | UBE2T_ENSG00000077152                                       |
| 1 | 202316716 | 2.02E+08 | KD2-H4K8ac_peak_2535 | 7.87496  | PPP1R12B_ENSG00000077157                                    |
| 1 | 202317892 | 2.02E+08 | KD2-H4K8ac_peak_2536 | 12.13241 | PPP1R12B_ENSG00000077157                                    |
| 1 | 202544233 | 2.03E+08 | KD2-H4K8ac_peak_2537 | 11.43863 |                                                             |
| 1 | 202592454 | 2.03E+08 | KD2-H4K8ac_peak_2538 | 8.01338  |                                                             |
| 1 | 202680876 | 2.03E+08 | KD2-H4K8ac_peak_2539 | 13.09338 |                                                             |
| 1 | 202681968 | 2.03E+08 | KD2-H4K8ac_peak_2540 | 6.04107  |                                                             |
| 1 | 202776044 | 2.03E+08 | KD2-H4K8ac_peak_2541 | 15.84211 |                                                             |
| 1 | 202780092 | 2.03E+08 | KD2-H4K8ac_peak_2542 | 8.0287   | RP11-480I12.10_ENSG00000260021;PCAT6_ENSG00000228288        |
| 1 | 202829679 | 2.03E+08 | KD2-H4K8ac_peak_2543 | 6.99815  | RP11-480I12.5_ENSG00000214796;RP11-480I12.7_ENSG00000234996 |
| 1 | 202831092 | 2.03E+08 | KD2-H4K8ac_peak_2544 | 7.70067  | RP11-480I12.5_ENSG00000214796;RP11-480I12.7_ENSG00000234996 |
| 1 | 202857656 | 2.03E+08 | KD2-H4K8ac_peak_2545 | 12.57865 | RABIF_ENSG00000183155                                       |
| 1 | 202895937 | 2.03E+08 | KD2-H4K8ac_peak_2546 | 13.94213 |                                                             |
| 1 | 202896920 | 2.03E+08 | KD2-H4K8ac_peak_2547 | 8.39745  | KLHL12_ENSG00000117153                                      |
| 1 | 202926920 | 2.03E+08 | KD2-H4K8ac_peak_2548 | 13.12288 | ADIPOR1_ENSG00000159346                                     |
| 1 | 202935982 | 2.03E+08 | KD2-H4K8ac_peak_2549 | 6.99815  | CYB5R1_ENSG00000159348                                      |
| 1 | 202936663 | 2.03E+08 | KD2-H4K8ac_peak_2550 | 4.8485   | CYB5R1_ENSG00000159348                                      |
| 1 | 202975495 | 2.03E+08 | KD2-H4K8ac_peak_2551 | 9.65086  | TMEM183A_ENSG00000163444                                    |
| 1 | 202976561 | 2.03E+08 | KD2-H4K8ac_peak_2552 | 10.66719 | TMEM183A_ENSG00000163444                                    |
| 1 | 202995727 | 2.03E+08 | KD2-H4K8ac_peak_2553 | 10.43145 | PPFIA4_ENSG00000143847                                      |
| 1 | 203020807 | 2.03E+08 | KD2-H4K8ac_peak_2554 | 5.01002  |                                                             |
| 1 | 203037961 | 2.03E+08 | KD2-H4K8ac_peak_2555 | 7.28827  |                                                             |
| 1 | 203096503 | 2.03E+08 | KD2-H4K8ac_peak_2556 | 15.58442 | RP11-335O13.7_ENSG00000234775                               |
| 1 | 203110251 | 2.03E+08 | KD2-H4K8ac_peak_2557 | 5.02474  |                                                             |
| 1 | 203150865 | 2.03E+08 | KD2-H4K8ac_peak_2558 | 6.62541  |                                                             |
| 1 | 203236725 | 2.03E+08 | KD2-H4K8ac_peak_2559 | 4.33139  |                                                             |
| 1 | 203239738 | 2.03E+08 | KD2-H4K8ac_peak_2560 | 7.51054  |                                                             |
| 1 | 203242516 | 2.03E+08 | KD2-H4K8ac_peak_2561 | 10.31695 | CHIT1_ENSG00000133063                                       |
| 1 | 203247010 | 2.03E+08 | KD2-H4K8ac_peak_2562 | 7.90806  |                                                             |
| 1 | 203247478 | 2.03E+08 | KD2-H4K8ac_peak_2563 | 6.52179  |                                                             |
| 1 | 203248047 | 2.03E+08 | KD2-H4K8ac_peak_2564 | 7.18615  |                                                             |
| 1 | 203256756 | 2.03E+08 | KD2-H4K8ac_peak_2565 | 5.5896   | RP11-134P9.3_ENSG00000231507                                |
| 1 | 203258473 | 2.03E+08 | KD2-H4K8ac_peak_2566 | 6.60096  |                                                             |
| 1 | 203259427 | 2.03E+08 | KD2-H4K8ac_peak_2567 | 14.66631 |                                                             |
| 1 | 203274126 | 2.03E+08 | KD2-H4K8ac_peak_2568 | 14.68449 | LINC01136_ENSG00000233791;BTG2_ENSG00000159388              |
| 1 | 203274697 | 2.03E+08 | KD2-H4K8ac_peak_2569 | 6.8713   | LINC01136_ENSG00000233791;BTG2_ENSG00000159388              |
| 1 | 203295972 | 2.03E+08 | KD2-H4K8ac_peak_2570 | 9.95759  |                                                             |
| 1 | 203296763 | 2.03E+08 | KD2-H4K8ac_peak_2571 | 21.09086 |                                                             |
| 1 | 203406949 | 2.03E+08 | KD2-H4K8ac_peak_2572 | 4.06758  |                                                             |
| 1 | 203475958 | 2.03E+08 | KD2-H4K8ac_peak_2573 | 13.42721 |                                                             |
| 1 | 203524028 | 2.04E+08 | KD2-H4K8ac_peak_2574 | 8.16906  |                                                             |

|   |           |          |                      |          |                                               |
|---|-----------|----------|----------------------|----------|-----------------------------------------------|
| 1 | 203596159 | 2.04E+08 | KD2-H4K8ac_peak_2575 | 8.45455  | ATP2B4_ENSG00000058668                        |
| 1 | 203619449 | 2.04E+08 | KD2-H4K8ac_peak_2576 | 7.07117  |                                               |
| 1 | 203738131 | 2.04E+08 | KD2-H4K8ac_peak_2577 | 6.99815  |                                               |
| 1 | 203738980 | 2.04E+08 | KD2-H4K8ac_peak_2578 | 7.81699  |                                               |
| 1 | 203764754 | 2.04E+08 | KD2-H4K8ac_peak_2579 | 5.54647  | ZC3H11A_ENSG00000058673;ZBED6_ENSG00000257315 |
| 1 | 203829875 | 2.04E+08 | KD2-H4K8ac_peak_2580 | 17.19888 | SNRPE_ENSG00000182004                         |
| 1 | 203830811 | 2.04E+08 | KD2-H4K8ac_peak_2581 | 14.80472 | SNRPE_ENSG00000182004                         |
| 1 | 204042341 | 2.04E+08 | KD2-H4K8ac_peak_2582 | 4.91674  | SOX13_ENSG00000143842                         |
| 1 | 204096060 | 2.04E+08 | KD2-H4K8ac_peak_2583 | 10.77651 |                                               |
| 1 | 204098579 | 2.04E+08 | KD2-H4K8ac_peak_2584 | 12.93209 |                                               |
| 1 | 204100472 | 2.04E+08 | KD2-H4K8ac_peak_2585 | 6.35843  | RP11-74C13.4_ENSG00000261065                  |
| 1 | 204121400 | 2.04E+08 | KD2-H4K8ac_peak_2586 | 12.10889 | ETNK2_ENSG00000143845                         |
| 1 | 204182867 | 2.04E+08 | KD2-H4K8ac_peak_2587 | 7.70067  | GOLT1A_ENSG00000174567                        |
| 1 | 204255955 | 2.04E+08 | KD2-H4K8ac_peak_2588 | 5.71781  |                                               |
| 1 | 204256781 | 2.04E+08 | KD2-H4K8ac_peak_2589 | 4.44527  |                                               |
| 1 | 204261484 | 2.04E+08 | KD2-H4K8ac_peak_2590 | 13.12288 |                                               |
| 1 | 204265568 | 2.04E+08 | KD2-H4K8ac_peak_2591 | 8.55271  |                                               |
| 1 | 204301220 | 2.04E+08 | KD2-H4K8ac_peak_2592 | 8.56442  |                                               |
| 1 | 204302358 | 2.04E+08 | KD2-H4K8ac_peak_2593 | 3.90565  |                                               |
| 1 | 204318091 | 2.04E+08 | KD2-H4K8ac_peak_2594 | 7.02255  |                                               |
| 1 | 204319345 | 2.04E+08 | KD2-H4K8ac_peak_2595 | 8.4716   |                                               |
| 1 | 204320396 | 2.04E+08 | KD2-H4K8ac_peak_2596 | 20.46575 |                                               |
| 1 | 204329186 | 2.04E+08 | KD2-H4K8ac_peak_2597 | 5.59859  |                                               |
| 1 | 204332183 | 2.04E+08 | KD2-H4K8ac_peak_2598 | 28.04957 |                                               |
| 1 | 204380719 | 2.04E+08 | KD2-H4K8ac_peak_2599 | 8.18084  | PPP1R15B_ENSG00000158615                      |
| 1 | 204381274 | 2.04E+08 | KD2-H4K8ac_peak_2600 | 12.82393 | PPP1R15B_ENSG00000158615                      |
| 1 | 204463103 | 2.04E+08 | KD2-H4K8ac_peak_2601 | 7.11824  | PIK3C2B_ENSG00000133056                       |
| 1 | 204476528 | 2.04E+08 | KD2-H4K8ac_peak_2602 | 11.92978 |                                               |
| 1 | 204484678 | 2.04E+08 | KD2-H4K8ac_peak_2603 | 21.2844  | MDM4_ENSG00000198625                          |
| 1 | 204553853 | 2.05E+08 | KD2-H4K8ac_peak_2604 | 4.86324  |                                               |
| 1 | 204599660 | 2.05E+08 | KD2-H4K8ac_peak_2605 | 14.66259 |                                               |
| 1 | 204606469 | 2.05E+08 | KD2-H4K8ac_peak_2606 | 9.26408  |                                               |
| 1 | 204607657 | 2.05E+08 | KD2-H4K8ac_peak_2607 | 9.41619  |                                               |
| 1 | 204654171 | 2.05E+08 | KD2-H4K8ac_peak_2608 | 9.20193  | LRRN2_ENSG00000170382                         |
| 1 | 205030476 | 2.05E+08 | KD2-H4K8ac_peak_2609 | 13.77586 | AL583832.1_ENSG00000251696                    |
| 1 | 205091617 | 2.05E+08 | KD2-H4K8ac_peak_2610 | 8.93255  | RBBP5_ENSG00000117222                         |
| 1 | 205179940 | 2.05E+08 | KD2-H4K8ac_peak_2611 | 15.82743 | DSTYK_ENSG00000133059                         |
| 1 | 205196696 | 2.05E+08 | KD2-H4K8ac_peak_2612 | 12.14909 | TMCC2_ENSG00000133069                         |
| 1 | 205218647 | 2.05E+08 | KD2-H4K8ac_peak_2613 | 9.89383  |                                               |
| 1 | 205253782 | 2.05E+08 | KD2-H4K8ac_peak_2614 | 5.96384  |                                               |
| 1 | 205312835 | 2.05E+08 | KD2-H4K8ac_peak_2615 | 7.89329  |                                               |
| 1 | 205320936 | 2.05E+08 | KD2-H4K8ac_peak_2616 | 10.73134 | SNRPGP10_ENSG00000235363                      |
| 1 | 205473820 | 2.05E+08 | KD2-H4K8ac_peak_2617 | 16.46127 | CDK18_ENSG00000117266                         |
| 1 | 205477940 | 2.05E+08 | KD2-H4K8ac_peak_2618 | 5.81222  |                                               |
| 1 | 205497841 | 2.05E+08 | KD2-H4K8ac_peak_2619 | 19.81292 |                                               |
| 1 | 205503103 | 2.06E+08 | KD2-H4K8ac_peak_2620 | 6.85193  |                                               |

|   |           |          |                      |          |                                                     |
|---|-----------|----------|----------------------|----------|-----------------------------------------------------|
| 1 | 205512267 | 2.06E+08 | KD2-H4K8ac_peak_2621 | 7.72045  |                                                     |
| 1 | 205600215 | 2.06E+08 | KD2-H4K8ac_peak_2622 | 19.77698 | ELK4_ENSG00000158711                                |
| 1 | 205601288 | 2.06E+08 | KD2-H4K8ac_peak_2623 | 7.49599  | ELK4_ENSG00000158711                                |
| 1 | 205648878 | 2.06E+08 | KD2-H4K8ac_peak_2624 | 10.05606 | SLC45A3_ENSG00000158715                             |
| 1 | 205649768 | 2.06E+08 | KD2-H4K8ac_peak_2625 | 9.01262  | SLC45A3_ENSG00000158715                             |
| 1 | 205718890 | 2.06E+08 | KD2-H4K8ac_peak_2626 | 9.6247   | NUCKS1_ENSG00000069275                              |
| 1 | 205719655 | 2.06E+08 | KD2-H4K8ac_peak_2627 | 9.34989  | NUCKS1_ENSG00000069275                              |
| 1 | 205720294 | 2.06E+08 | KD2-H4K8ac_peak_2628 | 6.67081  | NUCKS1_ENSG00000069275                              |
| 1 | 205744025 | 2.06E+08 | KD2-H4K8ac_peak_2629 | 13.12288 | RAB7L1_ENSG00000117280                              |
| 1 | 205861785 | 2.06E+08 | KD2-H4K8ac_peak_2630 | 5.54647  |                                                     |
| 1 | 206223337 | 2.06E+08 | KD2-H4K8ac_peak_2631 | 6.0073   | RP11-38J22.3_ENSG00000226780;AVPR1B_ENSG00000198049 |
| 1 | 206235463 | 2.06E+08 | KD2-H4K8ac_peak_2632 | 15.61313 |                                                     |
| 1 | 206247257 | 2.06E+08 | KD2-H4K8ac_peak_2633 | 10.78136 |                                                     |
| 1 | 206309763 | 2.06E+08 | KD2-H4K8ac_peak_2634 | 8.02571  |                                                     |
| 1 | 206707629 | 2.07E+08 | KD2-H4K8ac_peak_2635 | 4.75875  |                                                     |
| 1 | 206730620 | 2.07E+08 | KD2-H4K8ac_peak_2636 | 10.18408 |                                                     |
| 1 | 206785365 | 2.07E+08 | KD2-H4K8ac_peak_2637 | 16.87414 | EIF2D_ENSG00000143486                               |
| 1 | 206786085 | 2.07E+08 | KD2-H4K8ac_peak_2638 | 5.59859  | EIF2D_ENSG00000143486                               |
| 1 | 206808176 | 2.07E+08 | KD2-H4K8ac_peak_2639 | 7.40373  | RP11-343H5.6_ENSG00000237605;DYRK3_ENSG00000143479  |
| 1 | 206858361 | 2.07E+08 | KD2-H4K8ac_peak_2640 | 12.69561 | MAPKAPK2_ENSG00000162889                            |
| 1 | 207223742 | 2.07E+08 | KD2-H4K8ac_peak_2641 | 17.66411 | PFKFB2_ENSG00000123836                              |
| 1 | 207226391 | 2.07E+08 | KD2-H4K8ac_peak_2642 | 9.20193  | YOD1_ENSG00000180667                                |
| 1 | 207924779 | 2.08E+08 | KD2-H4K8ac_peak_2643 | 11.24702 | CD46_ENSG00000117335                                |
| 1 | 208041905 | 2.08E+08 | KD2-H4K8ac_peak_2644 | 28.04957 | C1orf132_ENSG00000203709                            |
| 1 | 208058780 | 2.08E+08 | KD2-H4K8ac_peak_2645 | 6.55628  |                                                     |
| 1 | 208084093 | 2.08E+08 | KD2-H4K8ac_peak_2646 | 9.01262  | CD34_ENSG00000174059                                |
| 1 | 208136080 | 2.08E+08 | KD2-H4K8ac_peak_2647 | 22.82182 |                                                     |
| 1 | 208137245 | 2.08E+08 | KD2-H4K8ac_peak_2648 | 6.29608  |                                                     |
| 1 | 208232240 | 2.08E+08 | KD2-H4K8ac_peak_2649 | 9.48511  |                                                     |
| 1 | 208233936 | 2.08E+08 | KD2-H4K8ac_peak_2650 | 6.66359  |                                                     |
| 1 | 208257472 | 2.08E+08 | KD2-H4K8ac_peak_2651 | 11.04256 |                                                     |
| 1 | 208332832 | 2.08E+08 | KD2-H4K8ac_peak_2652 | 10.74343 |                                                     |
| 1 | 208336708 | 2.08E+08 | KD2-H4K8ac_peak_2653 | 10.84871 |                                                     |
| 1 | 208352932 | 2.08E+08 | KD2-H4K8ac_peak_2654 | 5.4919   |                                                     |
| 1 | 208583616 | 2.09E+08 | KD2-H4K8ac_peak_2655 | 7.146    |                                                     |
| 1 | 208618893 | 2.09E+08 | KD2-H4K8ac_peak_2656 | 6.25869  |                                                     |
| 1 | 208673226 | 2.09E+08 | KD2-H4K8ac_peak_2657 | 9.51625  |                                                     |
| 1 | 208674213 | 2.09E+08 | KD2-H4K8ac_peak_2658 | 8.7325   |                                                     |
| 1 | 208683550 | 2.09E+08 | KD2-H4K8ac_peak_2659 | 6.83936  |                                                     |
| 1 | 208700120 | 2.09E+08 | KD2-H4K8ac_peak_2660 | 6.95649  |                                                     |
| 1 | 208706999 | 2.09E+08 | KD2-H4K8ac_peak_2661 | 5.88845  |                                                     |
| 1 | 208731303 | 2.09E+08 | KD2-H4K8ac_peak_2662 | 4.38478  |                                                     |
| 1 | 208824942 | 2.09E+08 | KD2-H4K8ac_peak_2663 | 4.211    |                                                     |
| 1 | 208921856 | 2.09E+08 | KD2-H4K8ac_peak_2664 | 6.40683  |                                                     |
| 1 | 208930034 | 2.09E+08 | KD2-H4K8ac_peak_2665 | 5.95537  |                                                     |
| 1 | 209065119 | 2.09E+08 | KD2-H4K8ac_peak_2666 | 6.4095   |                                                     |

|   |           |          |                      |          |                                                     |
|---|-----------|----------|----------------------|----------|-----------------------------------------------------|
| 1 | 209148785 | 2.09E+08 | KD2-H4K8ac_peak_2667 | 6.60096  |                                                     |
| 1 | 209237169 | 2.09E+08 | KD2-H4K8ac_peak_2668 | 5.53033  |                                                     |
| 1 | 209279498 | 2.09E+08 | KD2-H4K8ac_peak_2669 | 6.76298  |                                                     |
| 1 | 209380550 | 2.09E+08 | KD2-H4K8ac_peak_2670 | 14.68449 |                                                     |
| 1 | 209384340 | 2.09E+08 | KD2-H4K8ac_peak_2671 | 5.82859  |                                                     |
| 1 | 209393728 | 2.09E+08 | KD2-H4K8ac_peak_2672 | 10.44656 |                                                     |
| 1 | 209395298 | 2.09E+08 | KD2-H4K8ac_peak_2673 | 10.72656 |                                                     |
| 1 | 209437710 | 2.09E+08 | KD2-H4K8ac_peak_2674 | 6.2781   |                                                     |
| 1 | 209475848 | 2.09E+08 | KD2-H4K8ac_peak_2675 | 5.13615  |                                                     |
| 1 | 209477095 | 2.09E+08 | KD2-H4K8ac_peak_2676 | 6.05809  |                                                     |
| 1 | 209734989 | 2.1E+08  | KD2-H4K8ac_peak_2677 | 6.0073   |                                                     |
| 1 | 209814916 | 2.1E+08  | KD2-H4K8ac_peak_2678 | 6.98302  |                                                     |
| 1 | 209958585 | 2.1E+08  | KD2-H4K8ac_peak_2679 | 5.30799  | C1orf74_ENSG00000162757                             |
| 1 | 209975429 | 2.1E+08  | KD2-H4K8ac_peak_2680 | 7.9265   |                                                     |
| 1 | 210000667 | 2.1E+08  | KD2-H4K8ac_peak_2681 | 10.73134 | DIEXF_ENSG00000117597                               |
| 1 | 210001449 | 2.1E+08  | KD2-H4K8ac_peak_2682 | 5.08628  | DIEXF_ENSG00000117597                               |
| 1 | 210111068 | 2.1E+08  | KD2-H4K8ac_peak_2683 | 13.87818 | SYT14_ENSG00000143469                               |
| 1 | 210166898 | 2.1E+08  | KD2-H4K8ac_peak_2684 | 4.42765  |                                                     |
| 1 | 210406049 | 2.1E+08  | KD2-H4K8ac_peak_2685 | 21.23512 | SERTAD4-AS1_ENSG00000203706;SERTAD4_ENSG00000082497 |
| 1 | 210424575 | 2.1E+08  | KD2-H4K8ac_peak_2686 | 12.93862 |                                                     |
| 1 | 210430914 | 2.1E+08  | KD2-H4K8ac_peak_2687 | 5.54647  |                                                     |
| 1 | 210435402 | 2.1E+08  | KD2-H4K8ac_peak_2688 | 7.146    |                                                     |
| 1 | 210445731 | 2.1E+08  | KD2-H4K8ac_peak_2689 | 8.79106  |                                                     |
| 1 | 210464109 | 2.1E+08  | KD2-H4K8ac_peak_2690 | 9.36908  |                                                     |
| 1 | 210465486 | 2.1E+08  | KD2-H4K8ac_peak_2691 | 23.89229 |                                                     |
| 1 | 210467797 | 2.1E+08  | KD2-H4K8ac_peak_2692 | 8.80432  |                                                     |
| 1 | 210468971 | 2.1E+08  | KD2-H4K8ac_peak_2693 | 6.04107  |                                                     |
| 1 | 210484700 | 2.1E+08  | KD2-H4K8ac_peak_2694 | 14.66631 |                                                     |
| 1 | 210501825 | 2.11E+08 | KD2-H4K8ac_peak_2695 | 23.8784  | HHAT_ENSG00000054392                                |
| 1 | 210637603 | 2.11E+08 | KD2-H4K8ac_peak_2696 | 6.99815  |                                                     |
| 1 | 210639794 | 2.11E+08 | KD2-H4K8ac_peak_2697 | 7.167    |                                                     |
| 1 | 210708936 | 2.11E+08 | KD2-H4K8ac_peak_2698 | 6.65673  |                                                     |
| 1 | 210710478 | 2.11E+08 | KD2-H4K8ac_peak_2699 | 6.20282  |                                                     |
| 1 | 210743625 | 2.11E+08 | KD2-H4K8ac_peak_2700 | 8.10216  |                                                     |
| 1 | 210744421 | 2.11E+08 | KD2-H4K8ac_peak_2701 | 4.76255  |                                                     |
| 1 | 210745790 | 2.11E+08 | KD2-H4K8ac_peak_2702 | 9.71513  |                                                     |
| 1 | 210746625 | 2.11E+08 | KD2-H4K8ac_peak_2703 | 6.0605   |                                                     |
| 1 | 210757959 | 2.11E+08 | KD2-H4K8ac_peak_2704 | 8.52559  |                                                     |
| 1 | 210758698 | 2.11E+08 | KD2-H4K8ac_peak_2705 | 5.01002  |                                                     |
| 1 | 210819050 | 2.11E+08 | KD2-H4K8ac_peak_2706 | 12.81138 |                                                     |
| 1 | 210837023 | 2.11E+08 | KD2-H4K8ac_peak_2707 | 7.25989  |                                                     |
| 1 | 210838013 | 2.11E+08 | KD2-H4K8ac_peak_2708 | 7.76329  |                                                     |
| 1 | 210878148 | 2.11E+08 | KD2-H4K8ac_peak_2709 | 5.40356  |                                                     |
| 1 | 210895052 | 2.11E+08 | KD2-H4K8ac_peak_2710 | 11.24702 |                                                     |
| 1 | 211090242 | 2.11E+08 | KD2-H4K8ac_peak_2711 | 7.76569  |                                                     |
| 1 | 211306568 | 2.11E+08 | KD2-H4K8ac_peak_2712 | 11.86355 | KCNH1_ENSG00000143473;KCNH1-IT1_ENSG00000234233     |

|   |           |          |                      |          |                                                     |
|---|-----------|----------|----------------------|----------|-----------------------------------------------------|
| 1 | 211307843 | 2.11E+08 | KD2-H4K8ac_peak_2713 | 3.90565  | KCNH1_ENSG00000143473                               |
| 1 | 211431959 | 2.11E+08 | KD2-H4K8ac_peak_2714 | 7.90191  | RCOR3_ENSG00000117625                               |
| 1 | 211432780 | 2.11E+08 | KD2-H4K8ac_peak_2715 | 17.43561 |                                                     |
| 1 | 211499268 | 2.12E+08 | KD2-H4K8ac_peak_2716 | 19.54082 | TRAF5_ENSG00000082512                               |
| 1 | 211505215 | 2.12E+08 | KD2-H4K8ac_peak_2717 | 6.85508  |                                                     |
| 1 | 211555584 | 2.12E+08 | KD2-H4K8ac_peak_2718 | 7.81657  | LINC00467_ENSG00000153363                           |
| 1 | 211556228 | 2.12E+08 | KD2-H4K8ac_peak_2719 | 7.11824  | LINC00467_ENSG00000153363                           |
| 1 | 211658653 | 2.12E+08 | KD2-H4K8ac_peak_2720 | 7.87496  |                                                     |
| 1 | 211663009 | 2.12E+08 | KD2-H4K8ac_peak_2721 | 15.81243 | RD3_ENSG00000198570;RP11-359E8.3_ENSG00000223649    |
| 1 | 211665559 | 2.12E+08 | KD2-H4K8ac_peak_2722 | 9.95119  | RD3_ENSG00000198570;RP11-359E8.3_ENSG00000223649    |
| 1 | 211666537 | 2.12E+08 | KD2-H4K8ac_peak_2723 | 11.91259 | RD3_ENSG00000198570;RP11-359E8.3_ENSG00000223649    |
| 1 | 211667320 | 2.12E+08 | KD2-H4K8ac_peak_2724 | 8.4716   |                                                     |
| 1 | 211687622 | 2.12E+08 | KD2-H4K8ac_peak_2725 | 8.53092  |                                                     |
| 1 | 211688489 | 2.12E+08 | KD2-H4K8ac_peak_2726 | 15.82743 |                                                     |
| 1 | 211752017 | 2.12E+08 | KD2-H4K8ac_peak_2727 | 8.35267  | SLC30A1_ENSG00000170385                             |
| 1 | 211784618 | 2.12E+08 | KD2-H4K8ac_peak_2728 | 7.96322  |                                                     |
| 1 | 211790031 | 2.12E+08 | KD2-H4K8ac_peak_2729 | 7.81657  |                                                     |
| 1 | 211803735 | 2.12E+08 | KD2-H4K8ac_peak_2730 | 4.06758  |                                                     |
| 1 | 211816377 | 2.12E+08 | KD2-H4K8ac_peak_2731 | 10.43145 | RP11-354K1.2_ENSG00000228792                        |
| 1 | 211822578 | 2.12E+08 | KD2-H4K8ac_peak_2732 | 6.53538  |                                                     |
| 1 | 211849342 | 2.12E+08 | KD2-H4K8ac_peak_2733 | 4.211    | NEK2_ENSG00000117650;RP11-122M14.1_ENSG00000231057  |
| 1 | 211854528 | 2.12E+08 | KD2-H4K8ac_peak_2734 | 5.54647  |                                                     |
| 1 | 211889412 | 2.12E+08 | KD2-H4K8ac_peak_2735 | 4.76709  |                                                     |
| 1 | 212003497 | 2.12E+08 | KD2-H4K8ac_peak_2736 | 19.63735 | LPGAT1_ENSG00000123684;RP11-552D8.1_ENSG00000229258 |
| 1 | 212062850 | 2.12E+08 | KD2-H4K8ac_peak_2737 | 6.8713   |                                                     |
| 1 | 212458156 | 2.12E+08 | KD2-H4K8ac_peak_2738 | 10.6194  | PPP2R5A_ENSG00000066027                             |
| 1 | 212458871 | 2.12E+08 | KD2-H4K8ac_peak_2739 | 10.54778 | PPP2R5A_ENSG00000066027                             |
| 1 | 212588391 | 2.13E+08 | KD2-H4K8ac_peak_2740 | 6.40874  | TMEM206_ENSG00000065600                             |
| 1 | 212588783 | 2.13E+08 | KD2-H4K8ac_peak_2741 | 6.66359  | TMEM206_ENSG00000065600                             |
| 1 | 212605456 | 2.13E+08 | KD2-H4K8ac_peak_2742 | 5.14125  | NENF_ENSG00000117691                                |
| 1 | 212606311 | 2.13E+08 | KD2-H4K8ac_peak_2743 | 12.93209 | NENF_ENSG00000117691                                |
| 1 | 212692030 | 2.13E+08 | KD2-H4K8ac_peak_2744 | 9.18237  |                                                     |
| 1 | 212731420 | 2.13E+08 | KD2-H4K8ac_peak_2745 | 24.75834 | RP11-61J19.4_ENSG00000260805                        |
| 1 | 212732585 | 2.13E+08 | KD2-H4K8ac_peak_2746 | 6.8713   |                                                     |
| 1 | 212739724 | 2.13E+08 | KD2-H4K8ac_peak_2747 | 12.57297 |                                                     |
| 1 | 212780192 | 2.13E+08 | KD2-H4K8ac_peak_2748 | 4.54006  |                                                     |
| 1 | 212780817 | 2.13E+08 | KD2-H4K8ac_peak_2749 | 3.88385  |                                                     |
| 1 | 212781326 | 2.13E+08 | KD2-H4K8ac_peak_2750 | 8.58725  |                                                     |
| 1 | 212808907 | 2.13E+08 | KD2-H4K8ac_peak_2751 | 12.10889 |                                                     |
| 1 | 212810440 | 2.13E+08 | KD2-H4K8ac_peak_2752 | 8.7577   |                                                     |
| 1 | 212812693 | 2.13E+08 | KD2-H4K8ac_peak_2753 | 6.42941  |                                                     |
| 1 | 212906539 | 2.13E+08 | KD2-H4K8ac_peak_2754 | 5.57044  |                                                     |
| 1 | 212964685 | 2.13E+08 | KD2-H4K8ac_peak_2755 | 15.82362 | NSL1_ENSG00000117697;TATDN3_ENSG00000203705         |
| 1 | 212965285 | 2.13E+08 | KD2-H4K8ac_peak_2756 | 13.80019 | NSL1_ENSG00000117697;TATDN3_ENSG00000203705         |
| 1 | 213031051 | 2.13E+08 | KD2-H4K8ac_peak_2757 | 8.04448  | FLVCR1-AS1_ENSG00000198468;FLVCR1_ENSG00000162769   |
| 1 | 213031673 | 2.13E+08 | KD2-H4K8ac_peak_2758 | 16.95399 | FLVCR1-AS1_ENSG00000198468;FLVCR1_ENSG00000162769   |



|   |           |          |                      |          |                                                 |
|---|-----------|----------|----------------------|----------|-------------------------------------------------|
| 1 | 213090087 | 2.13E+08 | KD2-H4K8ac_peak_2759 | 7.47462  |                                                 |
| 1 | 213101971 | 2.13E+08 | KD2-H4K8ac_peak_2760 | 10.41994 |                                                 |
| 1 | 213123464 | 2.13E+08 | KD2-H4K8ac_peak_2761 | 10.87093 | VASH2_ENSG00000143494                           |
| 1 | 213124018 | 2.13E+08 | KD2-H4K8ac_peak_2762 | 4.33139  | VASH2_ENSG00000143494                           |
| 1 | 213188488 | 2.13E+08 | KD2-H4K8ac_peak_2763 | 13.65567 | ANGEL2_ENSG00000174606                          |
| 1 | 213189348 | 2.13E+08 | KD2-H4K8ac_peak_2764 | 16.71291 | ANGEL2_ENSG00000174606                          |
| 1 | 213223491 | 2.13E+08 | KD2-H4K8ac_peak_2765 | 5.14125  | RPS6KC1_ENSG00000136643                         |
| 1 | 213224041 | 2.13E+08 | KD2-H4K8ac_peak_2766 | 5.75757  | RPS6KC1_ENSG00000136643                         |
| 1 | 213224714 | 2.13E+08 | KD2-H4K8ac_peak_2767 | 9.71513  | RPS6KC1_ENSG00000136643                         |
| 1 | 214155953 | 2.14E+08 | KD2-H4K8ac_peak_2768 | 20.18584 | PROX1_ENSG00000117707                           |
| 1 | 214162919 | 2.14E+08 | KD2-H4K8ac_peak_2769 | 5.59859  |                                                 |
| 1 | 214179701 | 2.14E+08 | KD2-H4K8ac_peak_2770 | 6.47962  |                                                 |
| 1 | 214181459 | 2.14E+08 | KD2-H4K8ac_peak_2771 | 7.48958  |                                                 |
| 1 | 214182263 | 2.14E+08 | KD2-H4K8ac_peak_2772 | 9.33795  |                                                 |
| 1 | 214192341 | 2.14E+08 | KD2-H4K8ac_peak_2773 | 10.17486 |                                                 |
| 1 | 214193631 | 2.14E+08 | KD2-H4K8ac_peak_2774 | 4.70206  |                                                 |
| 1 | 214281343 | 2.14E+08 | KD2-H4K8ac_peak_2775 | 4.44748  |                                                 |
| 1 | 214316493 | 2.14E+08 | KD2-H4K8ac_peak_2776 | 5.88845  |                                                 |
| 1 | 214327557 | 2.14E+08 | KD2-H4K8ac_peak_2777 | 9.36516  |                                                 |
| 1 | 214329929 | 2.14E+08 | KD2-H4K8ac_peak_2778 | 10.96455 |                                                 |
| 1 | 214453244 | 2.14E+08 | KD2-H4K8ac_peak_2779 | 5.88845  |                                                 |
| 1 | 214453988 | 2.14E+08 | KD2-H4K8ac_peak_2780 | 27.46477 | SMYD2_ENSG00000143499                           |
| 1 | 214724558 | 2.15E+08 | KD2-H4K8ac_peak_2781 | 12.93209 | PTPN14_ENSG00000152104                          |
| 1 | 214776596 | 2.15E+08 | KD2-H4K8ac_peak_2782 | 18.37277 | CENPF_ENSG00000117724                           |
| 1 | 215740100 | 2.16E+08 | KD2-H4K8ac_peak_2783 | 16.18205 | KCTD3_ENSG00000136636                           |
| 1 | 216105867 | 2.16E+08 | KD2-H4K8ac_peak_2784 | 4.70388  |                                                 |
| 1 | 216621944 | 2.17E+08 | KD2-H4K8ac_peak_2785 | 8.49564  |                                                 |
| 1 | 216674093 | 2.17E+08 | KD2-H4K8ac_peak_2786 | 4.57371  |                                                 |
| 1 | 216675820 | 2.17E+08 | KD2-H4K8ac_peak_2787 | 7.35686  |                                                 |
| 1 | 216691693 | 2.17E+08 | KD2-H4K8ac_peak_2788 | 6.99815  |                                                 |
| 1 | 216704537 | 2.17E+08 | KD2-H4K8ac_peak_2789 | 6.66692  |                                                 |
| 1 | 216705131 | 2.17E+08 | KD2-H4K8ac_peak_2790 | 6.72624  |                                                 |
| 1 | 216705649 | 2.17E+08 | KD2-H4K8ac_peak_2791 | 6.90231  |                                                 |
| 1 | 216707881 | 2.17E+08 | KD2-H4K8ac_peak_2792 | 7.67504  |                                                 |
| 1 | 216749334 | 2.17E+08 | KD2-H4K8ac_peak_2793 | 9.08816  |                                                 |
| 1 | 216754691 | 2.17E+08 | KD2-H4K8ac_peak_2794 | 9.1707   |                                                 |
| 1 | 216755768 | 2.17E+08 | KD2-H4K8ac_peak_2795 | 5.13615  |                                                 |
| 1 | 216756860 | 2.17E+08 | KD2-H4K8ac_peak_2796 | 5.73839  |                                                 |
| 1 | 216769238 | 2.17E+08 | KD2-H4K8ac_peak_2797 | 8.23274  |                                                 |
| 1 | 216773179 | 2.17E+08 | KD2-H4K8ac_peak_2798 | 9.65086  |                                                 |
| 1 | 216774329 | 2.17E+08 | KD2-H4K8ac_peak_2799 | 8.0287   |                                                 |
| 1 | 217099216 | 2.17E+08 | KD2-H4K8ac_peak_2800 | 5.405    |                                                 |
| 1 | 217262309 | 2.17E+08 | KD2-H4K8ac_peak_2801 | 6.66692  |                                                 |
| 1 | 217262934 | 2.17E+08 | KD2-H4K8ac_peak_2802 | 19.28826 |                                                 |
| 1 | 217580856 | 2.18E+08 | KD2-H4K8ac_peak_2803 | 4.211    |                                                 |
| 1 | 217804123 | 2.18E+08 | KD2-H4K8ac_peak_2804 | 23.5321  | GPATCH2_ENSG00000092978;SPATA17_ENSG00000162814 |

|   |           |          |                      |          |                                                      |
|---|-----------|----------|----------------------|----------|------------------------------------------------------|
| 1 | 217847880 | 2.18E+08 | KD2-H4K8ac_peak_2805 | 7.76335  |                                                      |
| 1 | 217976326 | 2.18E+08 | KD2-H4K8ac_peak_2806 | 5.96828  |                                                      |
| 1 | 218338084 | 2.18E+08 | KD2-H4K8ac_peak_2807 | 12.93209 |                                                      |
| 1 | 218457871 | 2.18E+08 | KD2-H4K8ac_peak_2808 | 16.49944 | RRP15_ENSG00000067533                                |
| 1 | 218458706 | 2.18E+08 | KD2-H4K8ac_peak_2809 | 8.10216  | RRP15_ENSG00000067533                                |
| 1 | 218518623 | 2.19E+08 | KD2-H4K8ac_peak_2810 | 9.402    | RP11-224O19.2_ENSG00000232480;TGFB2_ENSG00000092969  |
| 1 | 218545371 | 2.19E+08 | KD2-H4K8ac_peak_2811 | 4.62142  |                                                      |
| 1 | 218636579 | 2.19E+08 | KD2-H4K8ac_peak_2812 | 4.67342  |                                                      |
| 1 | 219347255 | 2.19E+08 | KD2-H4K8ac_peak_2813 | 12.84642 | RP11-135J2.4_ENSG00000228063;LYPLAL1_ENSG00000143353 |
| 1 | 220101244 | 2.2E+08  | KD2-H4K8ac_peak_2814 | 9.20193  |                                                      |
| 1 | 220219457 | 2.2E+08  | KD2-H4K8ac_peak_2815 | 8.58725  | EPRS_ENSG00000136628                                 |
| 1 | 220220376 | 2.2E+08  | KD2-H4K8ac_peak_2816 | 12.57865 | EPRS_ENSG00000136628                                 |
| 1 | 220445339 | 2.2E+08  | KD2-H4K8ac_peak_2817 | 16.57619 | RAB3GAP2_ENSG00000118873                             |
| 1 | 220543404 | 2.21E+08 | KD2-H4K8ac_peak_2818 | 5.45396  |                                                      |
| 1 | 220701541 | 2.21E+08 | KD2-H4K8ac_peak_2819 | 12.15474 | MARK1_ENSG00000116141                                |
| 1 | 220863702 | 2.21E+08 | KD2-H4K8ac_peak_2820 | 13.65567 | C1orf115_ENSG00000162817                             |
| 1 | 220906151 | 2.21E+08 | KD2-H4K8ac_peak_2821 | 6.45063  |                                                      |
| 1 | 220921600 | 2.21E+08 | KD2-H4K8ac_peak_2822 | 9.26408  | MARC2_ENSG00000117791                                |
| 1 | 220959508 | 2.21E+08 | KD2-H4K8ac_peak_2823 | 7.11824  | MARC1_ENSG00000186205                                |
| 1 | 220960256 | 2.21E+08 | KD2-H4K8ac_peak_2824 | 14.85549 | MARC1_ENSG00000186205                                |
| 1 | 221052938 | 2.21E+08 | KD2-H4K8ac_peak_2825 | 10.7186  | HLA-AS1_ENSG00000257551                              |
| 1 | 221140840 | 2.21E+08 | KD2-H4K8ac_peak_2826 | 5.54647  |                                                      |
| 1 | 221437015 | 2.21E+08 | KD2-H4K8ac_peak_2827 | 5.07901  |                                                      |
| 1 | 221915894 | 2.22E+08 | KD2-H4K8ac_peak_2828 | 15.59774 | DUSP10_ENSG00000143507                               |
| 1 | 222006551 | 2.22E+08 | KD2-H4K8ac_peak_2829 | 7.70289  |                                                      |
| 1 | 222221411 | 2.22E+08 | KD2-H4K8ac_peak_2830 | 6.69844  |                                                      |
| 1 | 222623258 | 2.23E+08 | KD2-H4K8ac_peak_2831 | 5.92967  |                                                      |
| 1 | 222639559 | 2.23E+08 | KD2-H4K8ac_peak_2832 | 7.99241  |                                                      |
| 1 | 222762720 | 2.23E+08 | KD2-H4K8ac_peak_2833 | 10.46874 | TAF1A_ENSG00000143498;RP11-378J18.3_ENSG00000225265  |
| 1 | 222790686 | 2.23E+08 | KD2-H4K8ac_peak_2834 | 7.49599  | MIA3_ENSG00000154305                                 |
| 1 | 222816654 | 2.23E+08 | KD2-H4K8ac_peak_2835 | 12.13241 |                                                      |
| 1 | 222885833 | 2.23E+08 | KD2-H4K8ac_peak_2836 | 9.95119  | AIDA_ENSG00000186063;BROX_ENSG00000162819            |
| 1 | 222886896 | 2.23E+08 | KD2-H4K8ac_peak_2837 | 6.36375  | AIDA_ENSG00000186063                                 |
| 1 | 222987595 | 2.23E+08 | KD2-H4K8ac_peak_2838 | 8.16906  | RP11-452F19.3_ENSG00000228106;DISP1_ENSG00000154309  |
| 1 | 222988420 | 2.23E+08 | KD2-H4K8ac_peak_2839 | 17.67328 | RP11-452F19.3_ENSG00000228106;DISP1_ENSG00000154309  |
| 1 | 223195709 | 2.23E+08 | KD2-H4K8ac_peak_2840 | 6.84261  |                                                      |
| 1 | 223263249 | 2.23E+08 | KD2-H4K8ac_peak_2841 | 6.85193  |                                                      |
| 1 | 223302252 | 2.23E+08 | KD2-H4K8ac_peak_2842 | 6.41015  |                                                      |
| 1 | 223316116 | 2.23E+08 | KD2-H4K8ac_peak_2843 | 4.89305  | TLR5_ENSG00000187554;RP11-239E10.2_ENSG00000236846   |
| 1 | 223317205 | 2.23E+08 | KD2-H4K8ac_peak_2844 | 5.13615  | TLR5_ENSG00000187554;RP11-239E10.2_ENSG00000236846   |
| 1 | 223886336 | 2.24E+08 | KD2-H4K8ac_peak_2845 | 9.36516  |                                                      |
| 1 | 223899856 | 2.24E+08 | KD2-H4K8ac_peak_2846 | 16.04168 |                                                      |
| 1 | 223914586 | 2.24E+08 | KD2-H4K8ac_peak_2847 | 16.3889  |                                                      |
| 1 | 224020450 | 2.24E+08 | KD2-H4K8ac_peak_2848 | 7.47462  |                                                      |
| 1 | 224033064 | 2.24E+08 | KD2-H4K8ac_peak_2849 | 14.80472 | TP53BP2_ENSG00000143514                              |
| 1 | 224033917 | 2.24E+08 | KD2-H4K8ac_peak_2850 | 21.2844  | TP53BP2_ENSG00000143514                              |

|   |           |          |                      |          |                                                     |
|---|-----------|----------|----------------------|----------|-----------------------------------------------------|
| 1 | 224180576 | 2.24E+08 | KD2-H4K8ac_peak_2851 | 7.73264  |                                                     |
| 1 | 224301498 | 2.24E+08 | KD2-H4K8ac_peak_2852 | 36.65606 | FBXO28_ENSG00000143756                              |
| 1 | 224364174 | 2.24E+08 | KD2-H4K8ac_peak_2853 | 3.97079  | RP11-365O16.1_ENSG00000236773;DEGS1_ENSG00000143753 |
| 1 | 224371424 | 2.24E+08 | KD2-H4K8ac_peak_2854 | 9.95119  |                                                     |
| 1 | 224517522 | 2.25E+08 | KD2-H4K8ac_peak_2855 | 19.42408 | NVL_ENSG00000143748                                 |
| 1 | 224528655 | 2.25E+08 | KD2-H4K8ac_peak_2856 | 9.11031  |                                                     |
| 1 | 224543849 | 2.25E+08 | KD2-H4K8ac_peak_2857 | 8.43115  | CNIH4_ENSG00000143771                               |
| 1 | 224544673 | 2.25E+08 | KD2-H4K8ac_peak_2858 | 11.3923  | CNIH4_ENSG00000143771                               |
| 1 | 224622527 | 2.25E+08 | KD2-H4K8ac_peak_2859 | 26.38304 | CNIH3_ENSG00000143786                               |
| 1 | 224688482 | 2.25E+08 | KD2-H4K8ac_peak_2860 | 5.54647  |                                                     |
| 1 | 224690843 | 2.25E+08 | KD2-H4K8ac_peak_2861 | 14.63458 |                                                     |
| 1 | 224921388 | 2.25E+08 | KD2-H4K8ac_peak_2862 | 6.40297  |                                                     |
| 1 | 225116995 | 2.25E+08 | KD2-H4K8ac_peak_2863 | 22.62254 |                                                     |
| 1 | 225615417 | 2.26E+08 | KD2-H4K8ac_peak_2864 | 6.99194  | LBR_ENSG00000143815                                 |
| 1 | 225615974 | 2.26E+08 | KD2-H4K8ac_peak_2865 | 11.03268 | LBR_ENSG00000143815                                 |
| 1 | 225647843 | 2.26E+08 | KD2-H4K8ac_peak_2866 | 6.07398  |                                                     |
| 1 | 225649787 | 2.26E+08 | KD2-H4K8ac_peak_2867 | 7.92775  |                                                     |
| 1 | 225650662 | 2.26E+08 | KD2-H4K8ac_peak_2868 | 4.81427  |                                                     |
| 1 | 225662920 | 2.26E+08 | KD2-H4K8ac_peak_2869 | 7.90806  |                                                     |
| 1 | 225797462 | 2.26E+08 | KD2-H4K8ac_peak_2870 | 8.93112  |                                                     |
| 1 | 225839854 | 2.26E+08 | KD2-H4K8ac_peak_2871 | 28.7663  | ENAH_ENSG00000154380                                |
| 1 | 225949590 | 2.26E+08 | KD2-H4K8ac_peak_2872 | 5.20998  |                                                     |
| 1 | 225950299 | 2.26E+08 | KD2-H4K8ac_peak_2873 | 6.66692  |                                                     |
| 1 | 225965722 | 2.26E+08 | KD2-H4K8ac_peak_2874 | 3.82395  | SRP9_ENSG00000143742                                |
| 1 | 226069027 | 2.26E+08 | KD2-H4K8ac_peak_2875 | 4.50477  | TMEM63A_ENSG00000196187                             |
| 1 | 226069631 | 2.26E+08 | KD2-H4K8ac_peak_2876 | 6.0605   | TMEM63A_ENSG00000196187                             |
| 1 | 226070210 | 2.26E+08 | KD2-H4K8ac_peak_2877 | 26.62585 | TMEM63A_ENSG00000196187                             |
| 1 | 226086808 | 2.26E+08 | KD2-H4K8ac_peak_2878 | 4.211    |                                                     |
| 1 | 226111634 | 2.26E+08 | KD2-H4K8ac_peak_2879 | 11.85249 | RP4-559A3.7_ENSG00000255835;PYCR2_ENSG00000143811   |
| 1 | 226112303 | 2.26E+08 | KD2-H4K8ac_peak_2880 | 17.43561 | RP4-559A3.7_ENSG00000255835;PYCR2_ENSG00000143811   |
| 1 | 226115960 | 2.26E+08 | KD2-H4K8ac_peak_2881 | 6.34074  |                                                     |
| 1 | 226128387 | 2.26E+08 | KD2-H4K8ac_peak_2882 | 6.84261  | LEFTY2_ENSG00000143768                              |
| 1 | 226186642 | 2.26E+08 | KD2-H4K8ac_peak_2883 | 9.91109  | SDE2_ENSG00000143751                                |
| 1 | 226187378 | 2.26E+08 | KD2-H4K8ac_peak_2884 | 14.17488 | SDE2_ENSG00000143751                                |
| 1 | 226249312 | 2.26E+08 | KD2-H4K8ac_peak_2885 | 19.35989 | RP11-396C23.4_ENSG00000272562;H3F3A_ENSG00000163041 |
| 1 | 226250511 | 2.26E+08 | KD2-H4K8ac_peak_2886 | 16.43913 | RP11-396C23.4_ENSG00000272562;H3F3A_ENSG00000163041 |
| 1 | 226271054 | 2.26E+08 | KD2-H4K8ac_peak_2887 | 21.04966 | RP11-396C23.2_ENSG00000225518                       |
| 1 | 226297275 | 2.26E+08 | KD2-H4K8ac_peak_2888 | 8.10216  |                                                     |
| 1 | 226297842 | 2.26E+08 | KD2-H4K8ac_peak_2889 | 25.67347 |                                                     |
| 1 | 226308908 | 2.26E+08 | KD2-H4K8ac_peak_2890 | 34.51095 |                                                     |
| 1 | 226315624 | 2.26E+08 | KD2-H4K8ac_peak_2891 | 8.2413   | RP11-396C23.3_ENSG00000270598                       |
| 1 | 226323089 | 2.26E+08 | KD2-H4K8ac_peak_2892 | 6.40297  |                                                     |
| 1 | 226373860 | 2.26E+08 | KD2-H4K8ac_peak_2893 | 27.48654 | ACBD3_ENSG00000182827                               |
| 1 | 226411068 | 2.26E+08 | KD2-H4K8ac_peak_2894 | 12.66412 | MIXL1_ENSG00000185155                               |
| 1 | 226496079 | 2.26E+08 | KD2-H4K8ac_peak_2895 | 18.40451 | LIN9_ENSG00000183814                                |
| 1 | 226497064 | 2.26E+08 | KD2-H4K8ac_peak_2896 | 16.04168 | LIN9_ENSG00000183814                                |

|   |           |          |                      |          |                                                    |
|---|-----------|----------|----------------------|----------|----------------------------------------------------|
| 1 | 226595236 | 2.27E+08 | KD2-H4K8ac_peak_2897 | 10.43145 | PARP1_ENSG00000143799                              |
| 1 | 226596078 | 2.27E+08 | KD2-H4K8ac_peak_2898 | 4.33139  | PARP1_ENSG00000143799                              |
| 1 | 226843008 | 2.27E+08 | KD2-H4K8ac_peak_2899 | 5.54647  |                                                    |
| 1 | 226878036 | 2.27E+08 | KD2-H4K8ac_peak_2900 | 7.78826  |                                                    |
| 1 | 226879102 | 2.27E+08 | KD2-H4K8ac_peak_2901 | 4.68541  |                                                    |
| 1 | 226890891 | 2.27E+08 | KD2-H4K8ac_peak_2902 | 20.48577 |                                                    |
| 1 | 226925266 | 2.27E+08 | KD2-H4K8ac_peak_2903 | 8.4716   |                                                    |
| 1 | 226926422 | 2.27E+08 | KD2-H4K8ac_peak_2904 | 9.18237  | ITPKB_ENSG00000143772                              |
| 1 | 227057884 | 2.27E+08 | KD2-H4K8ac_peak_2905 | 19.3524  | PSEN2_ENSG00000143801                              |
| 1 | 227127026 | 2.27E+08 | KD2-H4K8ac_peak_2906 | 12.66165 |                                                    |
| 1 | 227161900 | 2.27E+08 | KD2-H4K8ac_peak_2907 | 8.10216  |                                                    |
| 1 | 227505459 | 2.28E+08 | KD2-H4K8ac_peak_2908 | 6.31838  | CDC42BPA_ENSG00000143776                           |
| 1 | 227619404 | 2.28E+08 | KD2-H4K8ac_peak_2909 | 6.66692  |                                                    |
| 1 | 227729365 | 2.28E+08 | KD2-H4K8ac_peak_2910 | 20.30085 |                                                    |
| 1 | 227730558 | 2.28E+08 | KD2-H4K8ac_peak_2911 | 7.76104  |                                                    |
| 1 | 227750660 | 2.28E+08 | KD2-H4K8ac_peak_2912 | 13.99847 | ZNF678_ENSG00000181450                             |
| 1 | 227751246 | 2.28E+08 | KD2-H4K8ac_peak_2913 | 10.7186  | ZNF678_ENSG00000181450                             |
| 1 | 227916399 | 2.28E+08 | KD2-H4K8ac_peak_2914 | 8.30974  | SNAP47_ENSG00000143740                             |
| 1 | 227922596 | 2.28E+08 | KD2-H4K8ac_peak_2915 | 7.73264  | JMJD4_ENSG00000081692                              |
| 1 | 227923211 | 2.28E+08 | KD2-H4K8ac_peak_2916 | 17.66411 | JMJD4_ENSG00000081692                              |
| 1 | 227980850 | 2.28E+08 | KD2-H4K8ac_peak_2917 | 9.63487  |                                                    |
| 1 | 228074311 | 2.28E+08 | KD2-H4K8ac_peak_2918 | 6.40874  |                                                    |
| 1 | 228248037 | 2.28E+08 | KD2-H4K8ac_peak_2919 | 4.44527  |                                                    |
| 1 | 228269362 | 2.28E+08 | KD2-H4K8ac_peak_2920 | 16.07478 | ARF1_ENSG00000143761                               |
| 1 | 228270635 | 2.28E+08 | KD2-H4K8ac_peak_2921 | 6.52179  | ARF1_ENSG00000143761                               |
| 1 | 228291236 | 2.28E+08 | KD2-H4K8ac_peak_2922 | 12.14337 |                                                    |
| 1 | 228296626 | 2.28E+08 | KD2-H4K8ac_peak_2923 | 19.39602 | MRPL55_ENSG00000162910                             |
| 1 | 228297201 | 2.28E+08 | KD2-H4K8ac_peak_2924 | 19.55721 | MRPL55_ENSG00000162910                             |
| 1 | 228327114 | 2.28E+08 | KD2-H4K8ac_peak_2925 | 16.21671 | GUK1_ENSG00000143774                               |
| 1 | 228328102 | 2.28E+08 | KD2-H4K8ac_peak_2926 | 5.61306  | GUK1_ENSG00000143774                               |
| 1 | 228337463 | 2.28E+08 | KD2-H4K8ac_peak_2927 | 9.07715  | GJC2_ENSG00000198835                               |
| 1 | 228339011 | 2.28E+08 | KD2-H4K8ac_peak_2928 | 4.211    |                                                    |
| 1 | 228352893 | 2.28E+08 | KD2-H4K8ac_peak_2929 | 14.63458 | IBA57-AS1_ENSG00000203684;IBA57_ENSG00000181873    |
| 1 | 228353444 | 2.28E+08 | KD2-H4K8ac_peak_2930 | 27.01413 | IBA57-AS1_ENSG00000203684;IBA57_ENSG00000181873    |
| 1 | 228354031 | 2.28E+08 | KD2-H4K8ac_peak_2931 | 10.74343 | IBA57-AS1_ENSG00000203684;IBA57_ENSG00000181873    |
| 1 | 228400392 | 2.28E+08 | KD2-H4K8ac_peak_2932 | 8.55271  | C1orf145_ENSG00000162913                           |
| 1 | 228565869 | 2.29E+08 | KD2-H4K8ac_peak_2933 | 8.84009  |                                                    |
| 1 | 228566366 | 2.29E+08 | KD2-H4K8ac_peak_2934 | 8.18084  |                                                    |
| 1 | 228603661 | 2.29E+08 | KD2-H4K8ac_peak_2935 | 9.36665  | TRIM17_ENSG00000162931                             |
| 1 | 228604883 | 2.29E+08 | KD2-H4K8ac_peak_2936 | 9.14807  | TRIM17_ENSG00000162931                             |
| 1 | 228644860 | 2.29E+08 | KD2-H4K8ac_peak_2937 | 3.97079  | HIST3H2A_ENSG00000181218;HIST3H2BB_ENSG00000196890 |
| 1 | 228647411 | 2.29E+08 | KD2-H4K8ac_peak_2938 | 8.11396  |                                                    |
| 1 | 228651805 | 2.29E+08 | KD2-H4K8ac_peak_2939 | 6.80488  | HIST3H2BA_ENSG00000181201                          |
| 1 | 228653310 | 2.29E+08 | KD2-H4K8ac_peak_2940 | 5.54647  | HIST3H2BA_ENSG00000181201                          |
| 1 | 228674039 | 2.29E+08 | KD2-H4K8ac_peak_2941 | 11.7608  | RNF187_ENSG00000168159                             |
| 1 | 228674791 | 2.29E+08 | KD2-H4K8ac_peak_2942 | 13.40544 | RNF187_ENSG00000168159                             |

|   |           |          |                      |          |                                                                                   |
|---|-----------|----------|----------------------|----------|-----------------------------------------------------------------------------------|
| 1 | 228688944 | 2.29E+08 | KD2-H4K8ac_peak_2943 | 7.40314  |                                                                                   |
| 1 | 228782712 | 2.29E+08 | KD2-H4K8ac_peak_2944 | 8.79106  | RNA5S17_ENSG00000200370;RNA5SP18_ENSG00000212237                                  |
| 1 | 228784056 | 2.29E+08 | KD2-H4K8ac_peak_2945 | 9.34195  | RNA5SP18_ENSG00000212237                                                          |
| 1 | 228870783 | 2.29E+08 | KD2-H4K8ac_peak_2946 | 11.24702 | RHOU_ENSG00000116574                                                              |
| 1 | 228999350 | 2.29E+08 | KD2-H4K8ac_peak_2947 | 7.70067  |                                                                                   |
| 1 | 229000321 | 2.29E+08 | KD2-H4K8ac_peak_2948 | 4.67342  |                                                                                   |
| 1 | 229002054 | 2.29E+08 | KD2-H4K8ac_peak_2949 | 11.14749 |                                                                                   |
| 1 | 229003705 | 2.29E+08 | KD2-H4K8ac_peak_2950 | 8.38045  |                                                                                   |
| 1 | 229004418 | 2.29E+08 | KD2-H4K8ac_peak_2951 | 10.44656 |                                                                                   |
| 1 | 229007939 | 2.29E+08 | KD2-H4K8ac_peak_2952 | 7.90806  |                                                                                   |
| 1 | 229008510 | 2.29E+08 | KD2-H4K8ac_peak_2953 | 5.5478   |                                                                                   |
| 1 | 229035346 | 2.29E+08 | KD2-H4K8ac_peak_2954 | 12.46522 |                                                                                   |
| 1 | 229123554 | 2.29E+08 | KD2-H4K8ac_peak_2955 | 12.78054 |                                                                                   |
| 1 | 229126131 | 2.29E+08 | KD2-H4K8ac_peak_2956 | 12.14909 |                                                                                   |
| 1 | 229164133 | 2.29E+08 | KD2-H4K8ac_peak_2957 | 9.74423  |                                                                                   |
| 1 | 229193920 | 2.29E+08 | KD2-H4K8ac_peak_2958 | 17.8737  |                                                                                   |
| 1 | 229195204 | 2.29E+08 | KD2-H4K8ac_peak_2959 | 8.82006  |                                                                                   |
| 1 | 229249642 | 2.29E+08 | KD2-H4K8ac_peak_2960 | 5.72327  |                                                                                   |
| 1 | 229250585 | 2.29E+08 | KD2-H4K8ac_peak_2961 | 11.90231 |                                                                                   |
| 1 | 229284060 | 2.29E+08 | KD2-H4K8ac_peak_2962 | 3.86308  |                                                                                   |
| 1 | 229389803 | 2.29E+08 | KD2-H4K8ac_peak_2963 | 6.66692  |                                                                                   |
| 1 | 229406343 | 2.29E+08 | KD2-H4K8ac_peak_2964 | 19.21269 | RP5-1061H20.4_ENSG00000177788;RP5-1061H20.3_ENSG00000240524;RAB4A_ENSG00000168118 |
| 1 | 229478501 | 2.29E+08 | KD2-H4K8ac_peak_2965 | 14.57762 | CCSAP_ENSG00000154429                                                             |
| 1 | 229545045 | 2.3E+08  | KD2-H4K8ac_peak_2966 | 4.91796  |                                                                                   |
| 1 | 229545664 | 2.3E+08  | KD2-H4K8ac_peak_2967 | 9.34195  | RN7SKP276_ENSG00000252051                                                         |
| 1 | 229546671 | 2.3E+08  | KD2-H4K8ac_peak_2968 | 5.48272  | RN7SKP276_ENSG00000252051                                                         |
| 1 | 229547426 | 2.3E+08  | KD2-H4K8ac_peak_2969 | 10.43145 | RN7SKP276_ENSG00000252051                                                         |
| 1 | 229643831 | 2.3E+08  | KD2-H4K8ac_peak_2970 | 7.57336  | NUP133_ENSG00000069248;RP4-613A2.1_ENSG00000223635                                |
| 1 | 229644580 | 2.3E+08  | KD2-H4K8ac_peak_2971 | 10.77651 | NUP133_ENSG00000069248;RP4-613A2.1_ENSG00000223635                                |
| 1 | 229694101 | 2.3E+08  | KD2-H4K8ac_peak_2972 | 8.0287   | ABCB10_ENSG00000135776                                                            |
| 1 | 229715106 | 2.3E+08  | KD2-H4K8ac_peak_2973 | 12.84642 |                                                                                   |
| 1 | 229762066 | 2.3E+08  | KD2-H4K8ac_peak_2974 | 7.28628  | TAF5L_ENSG00000135801;URB2_ENSG00000135763                                        |
| 1 | 229827696 | 2.3E+08  | KD2-H4K8ac_peak_2975 | 7.36799  |                                                                                   |
| 1 | 229828794 | 2.3E+08  | KD2-H4K8ac_peak_2976 | 10.17341 |                                                                                   |
| 1 | 229829469 | 2.3E+08  | KD2-H4K8ac_peak_2977 | 15.66774 |                                                                                   |
| 1 | 229831710 | 2.3E+08  | KD2-H4K8ac_peak_2978 | 9.20193  |                                                                                   |
| 1 | 230018479 | 2.3E+08  | KD2-H4K8ac_peak_2979 | 6.17833  |                                                                                   |
| 1 | 230029510 | 2.3E+08  | KD2-H4K8ac_peak_2980 | 7.14562  |                                                                                   |
| 1 | 230078285 | 2.3E+08  | KD2-H4K8ac_peak_2981 | 5.72657  |                                                                                   |
| 1 | 230079440 | 2.3E+08  | KD2-H4K8ac_peak_2982 | 9.20193  |                                                                                   |
| 1 | 230080046 | 2.3E+08  | KD2-H4K8ac_peak_2983 | 3.86308  |                                                                                   |
| 1 | 230202223 | 2.3E+08  | KD2-H4K8ac_peak_2984 | 4.211    |                                                                                   |
| 1 | 230401022 | 2.3E+08  | KD2-H4K8ac_peak_2985 | 4.56666  |                                                                                   |
| 1 | 230404353 | 2.3E+08  | KD2-H4K8ac_peak_2986 | 6.98244  | RP5-956O18.2_ENSG00000227006                                                      |
| 1 | 230405397 | 2.3E+08  | KD2-H4K8ac_peak_2987 | 8.10216  |                                                                                   |
| 1 | 230406881 | 2.3E+08  | KD2-H4K8ac_peak_2988 | 5.94405  |                                                                                   |

|   |           |          |                      |          |                                                                                 |
|---|-----------|----------|----------------------|----------|---------------------------------------------------------------------------------|
| 1 | 230417034 | 2.3E+08  | KD2-H4K8ac_peak_2989 | 8.1761   | RP5-956O18.3_ENSG00000224407                                                    |
| 1 | 230435165 | 2.3E+08  | KD2-H4K8ac_peak_2990 | 6.99815  |                                                                                 |
| 1 | 230451089 | 2.3E+08  | KD2-H4K8ac_peak_2991 | 5.30494  | AL691479.1_ENSG00000203257                                                      |
| 1 | 230777617 | 2.31E+08 | KD2-H4K8ac_peak_2992 | 5.59859  | COG2_ENSG00000135775                                                            |
| 1 | 230778269 | 2.31E+08 | KD2-H4K8ac_peak_2993 | 12.00597 | COG2_ENSG00000135775                                                            |
| 1 | 230879267 | 2.31E+08 | KD2-H4K8ac_peak_2994 | 8.58725  |                                                                                 |
| 1 | 231004562 | 2.31E+08 | KD2-H4K8ac_peak_2995 | 15.2334  | C1orf198_ENSG00000119280                                                        |
| 1 | 231114150 | 2.31E+08 | KD2-H4K8ac_peak_2996 | 5.94405  | TTC13_ENSG00000143643;ARV1_ENSG00000173409                                      |
| 1 | 231175056 | 2.31E+08 | KD2-H4K8ac_peak_2997 | 10.49196 | FAM89A_ENSG00000182118                                                          |
| 1 | 231194792 | 2.31E+08 | KD2-H4K8ac_peak_2998 | 7.36799  |                                                                                 |
| 1 | 231243741 | 2.31E+08 | KD2-H4K8ac_peak_2999 | 6.25869  |                                                                                 |
| 1 | 231245232 | 2.31E+08 | KD2-H4K8ac_peak_3000 | 9.1707   |                                                                                 |
| 1 | 231297056 | 2.31E+08 | KD2-H4K8ac_peak_3001 | 6.0605   | TRIM67_ENSG00000119283                                                          |
| 1 | 231297943 | 2.31E+08 | KD2-H4K8ac_peak_3002 | 7.11824  | TRIM67_ENSG00000119283                                                          |
| 1 | 231335515 | 2.31E+08 | KD2-H4K8ac_peak_3003 | 8.79106  |                                                                                 |
| 1 | 231346937 | 2.31E+08 | KD2-H4K8ac_peak_3004 | 12.30509 |                                                                                 |
| 1 | 231376536 | 2.31E+08 | KD2-H4K8ac_peak_3005 | 14.39182 | C1orf131_ENSG00000143633;GNPAT_ENSG00000116906                                  |
| 1 | 231474051 | 2.31E+08 | KD2-H4K8ac_peak_3006 | 7.08655  | EXOC8_ENSG00000116903                                                           |
| 1 | 231557689 | 2.32E+08 | KD2-H4K8ac_peak_3007 | 10.78621 |                                                                                 |
| 1 | 231558213 | 2.32E+08 | KD2-H4K8ac_peak_3008 | 11.04256 |                                                                                 |
| 1 | 231663240 | 2.32E+08 | KD2-H4K8ac_peak_3009 | 12.84642 | RP11-295G20.2_ENSG00000233461;TSNAX-DISC1_ENSG00000270106;TSNAX_ENSG00000116918 |
| 1 | 231664473 | 2.32E+08 | KD2-H4K8ac_peak_3010 | 6.40297  | RP11-295G20.2_ENSG00000233461;TSNAX-DISC1_ENSG00000270106;TSNAX_ENSG00000116918 |
| 1 | 231762591 | 2.32E+08 | KD2-H4K8ac_peak_3011 | 8.16906  | DISC1_ENSG00000162946                                                           |
| 1 | 231830362 | 2.32E+08 | KD2-H4K8ac_peak_3012 | 9.048    |                                                                                 |
| 1 | 231942352 | 2.32E+08 | KD2-H4K8ac_peak_3013 | 6.13909  |                                                                                 |
| 1 | 232354785 | 2.32E+08 | KD2-H4K8ac_peak_3014 | 7.47462  |                                                                                 |
| 1 | 232363061 | 2.32E+08 | KD2-H4K8ac_peak_3015 | 5.61377  |                                                                                 |
| 1 | 232727145 | 2.33E+08 | KD2-H4K8ac_peak_3016 | 7.9042   |                                                                                 |
| 1 | 232735051 | 2.33E+08 | KD2-H4K8ac_peak_3017 | 4.54006  |                                                                                 |
| 1 | 232755398 | 2.33E+08 | KD2-H4K8ac_peak_3018 | 5.14125  |                                                                                 |
| 1 | 232766238 | 2.33E+08 | KD2-H4K8ac_peak_3019 | 7.49599  |                                                                                 |
| 1 | 232940597 | 2.33E+08 | KD2-H4K8ac_peak_3020 | 8.0287   | MAP10_ENSG00000212916                                                           |
| 1 | 233007084 | 2.33E+08 | KD2-H4K8ac_peak_3021 | 13.95627 |                                                                                 |
| 1 | 233009168 | 2.33E+08 | KD2-H4K8ac_peak_3022 | 6.25869  |                                                                                 |
| 1 | 233029114 | 2.33E+08 | KD2-H4K8ac_peak_3023 | 6.84261  |                                                                                 |
| 1 | 233078645 | 2.33E+08 | KD2-H4K8ac_peak_3024 | 6.56926  |                                                                                 |
| 1 | 233085830 | 2.33E+08 | KD2-H4K8ac_peak_3025 | 8.3261   | NTPCR_ENSG00000135778                                                           |
| 1 | 233086364 | 2.33E+08 | KD2-H4K8ac_peak_3026 | 10.24981 | NTPCR_ENSG00000135778                                                           |
| 1 | 233431049 | 2.33E+08 | KD2-H4K8ac_peak_3027 | 10.76532 | PCNXL2_ENSG00000135749;RP5-862P8.3_ENSG00000251508                              |
| 1 | 233463522 | 2.33E+08 | KD2-H4K8ac_peak_3028 | 9.78882  | MLK4_ENSG00000143674                                                            |
| 1 | 233582870 | 2.34E+08 | KD2-H4K8ac_peak_3029 | 9.1707   |                                                                                 |
| 1 | 233584878 | 2.34E+08 | KD2-H4K8ac_peak_3030 | 5.87879  | RNU4-77P_ENSG00000252501                                                        |
| 1 | 233590797 | 2.34E+08 | KD2-H4K8ac_peak_3031 | 5.09296  |                                                                                 |
| 1 | 233704834 | 2.34E+08 | KD2-H4K8ac_peak_3032 | 6.40683  |                                                                                 |
| 1 | 233723887 | 2.34E+08 | KD2-H4K8ac_peak_3033 | 5.88845  |                                                                                 |
| 1 | 233749346 | 2.34E+08 | KD2-H4K8ac_peak_3034 | 10.7186  | KCNK1_ENSG00000135750                                                           |

|   |           |          |                      |          |                                                                                |
|---|-----------|----------|----------------------|----------|--------------------------------------------------------------------------------|
| 1 | 233951723 | 2.34E+08 | KD2-H4K8ac_peak_3035 | 6.60096  |                                                                                |
| 1 | 234040497 | 2.34E+08 | KD2-H4K8ac_peak_3036 | 10.17486 | SLC35F3_ENSG00000183780                                                        |
| 1 | 234417719 | 2.34E+08 | KD2-H4K8ac_peak_3037 | 8.79106  |                                                                                |
| 1 | 234508768 | 2.35E+08 | KD2-H4K8ac_peak_3038 | 14.99434 | RP5-827C21.6_ENSG00000273367;RP5-827C21.4_ENSG00000231663;COA6_ENSG00000168275 |
| 1 | 234613793 | 2.35E+08 | KD2-H4K8ac_peak_3039 | 22.08065 | TARBP1_ENSG00000059588                                                         |
| 1 | 234634601 | 2.35E+08 | KD2-H4K8ac_peak_3040 | 8.85813  |                                                                                |
| 1 | 234645158 | 2.35E+08 | KD2-H4K8ac_peak_3041 | 6.99815  |                                                                                |
| 1 | 234645701 | 2.35E+08 | KD2-H4K8ac_peak_3042 | 5.01002  |                                                                                |
| 1 | 234666949 | 2.35E+08 | KD2-H4K8ac_peak_3043 | 15.61313 | RP5-855F14.1_ENSG00000231768                                                   |
| 1 | 234669149 | 2.35E+08 | KD2-H4K8ac_peak_3044 | 5.9696   |                                                                                |
| 1 | 234670188 | 2.35E+08 | KD2-H4K8ac_peak_3045 | 11.50346 |                                                                                |
| 1 | 234671440 | 2.35E+08 | KD2-H4K8ac_peak_3046 | 8.53092  |                                                                                |
| 1 | 234675961 | 2.35E+08 | KD2-H4K8ac_peak_3047 | 4.37809  |                                                                                |
| 1 | 234677957 | 2.35E+08 | KD2-H4K8ac_peak_3048 | 23.04547 |                                                                                |
| 1 | 234678566 | 2.35E+08 | KD2-H4K8ac_peak_3049 | 9.20193  |                                                                                |
| 1 | 234679374 | 2.35E+08 | KD2-H4K8ac_peak_3050 | 8.10216  |                                                                                |
| 1 | 234680565 | 2.35E+08 | KD2-H4K8ac_peak_3051 | 7.92775  |                                                                                |
| 1 | 234681588 | 2.35E+08 | KD2-H4K8ac_peak_3052 | 13.50626 |                                                                                |
| 1 | 234682966 | 2.35E+08 | KD2-H4K8ac_peak_3053 | 6.52841  |                                                                                |
| 1 | 234685412 | 2.35E+08 | KD2-H4K8ac_peak_3054 | 6.17833  |                                                                                |
| 1 | 234686837 | 2.35E+08 | KD2-H4K8ac_peak_3055 | 5.66705  |                                                                                |
| 1 | 234688702 | 2.35E+08 | KD2-H4K8ac_peak_3056 | 8.85813  |                                                                                |
| 1 | 234689629 | 2.35E+08 | KD2-H4K8ac_peak_3057 | 13.02811 |                                                                                |
| 1 | 234693881 | 2.35E+08 | KD2-H4K8ac_peak_3058 | 4.37809  |                                                                                |
| 1 | 234694634 | 2.35E+08 | KD2-H4K8ac_peak_3059 | 7.69287  |                                                                                |
| 1 | 234695493 | 2.35E+08 | KD2-H4K8ac_peak_3060 | 6.16883  |                                                                                |
| 1 | 234697295 | 2.35E+08 | KD2-H4K8ac_peak_3061 | 12.74171 |                                                                                |
| 1 | 234698879 | 2.35E+08 | KD2-H4K8ac_peak_3062 | 10.65724 |                                                                                |
| 1 | 234706373 | 2.35E+08 | KD2-H4K8ac_peak_3063 | 9.48012  |                                                                                |
| 1 | 234707188 | 2.35E+08 | KD2-H4K8ac_peak_3064 | 10.54073 |                                                                                |
| 1 | 234707701 | 2.35E+08 | KD2-H4K8ac_peak_3065 | 5.9696   |                                                                                |
| 1 | 234708293 | 2.35E+08 | KD2-H4K8ac_peak_3066 | 6.99815  |                                                                                |
| 1 | 234708900 | 2.35E+08 | KD2-H4K8ac_peak_3067 | 6.78242  |                                                                                |
| 1 | 234736028 | 2.35E+08 | KD2-H4K8ac_peak_3068 | 9.36516  |                                                                                |
| 1 | 234744187 | 2.35E+08 | KD2-H4K8ac_peak_3069 | 6.2827   | IRF2BP2_ENSG00000168264                                                        |
| 1 | 234746132 | 2.35E+08 | KD2-H4K8ac_peak_3070 | 12.93209 | IRF2BP2_ENSG00000168264                                                        |
| 1 | 234747614 | 2.35E+08 | KD2-H4K8ac_peak_3071 | 8.21523  |                                                                                |
| 1 | 234748723 | 2.35E+08 | KD2-H4K8ac_peak_3072 | 12.82393 |                                                                                |
| 1 | 234811562 | 2.35E+08 | KD2-H4K8ac_peak_3073 | 15.9608  |                                                                                |
| 1 | 234858140 | 2.35E+08 | KD2-H4K8ac_peak_3074 | 9.20193  |                                                                                |
| 1 | 234858903 | 2.35E+08 | KD2-H4K8ac_peak_3075 | 9.97685  | LINC01132_ENSG00000227630                                                      |
| 1 | 234860372 | 2.35E+08 | KD2-H4K8ac_peak_3076 | 17.9614  | LINC01132_ENSG00000227630                                                      |
| 1 | 234882646 | 2.35E+08 | KD2-H4K8ac_peak_3077 | 8.23274  |                                                                                |
| 1 | 234905802 | 2.35E+08 | KD2-H4K8ac_peak_3078 | 14.03725 |                                                                                |
| 1 | 235003175 | 2.35E+08 | KD2-H4K8ac_peak_3079 | 6.99815  |                                                                                |
| 1 | 235093581 | 2.35E+08 | KD2-H4K8ac_peak_3080 | 5.4779   | RP11-443B7.2_ENSG00000237520                                                   |

|   |           |          |                      |          |                                                 |
|---|-----------|----------|----------------------|----------|-------------------------------------------------|
| 1 | 235104614 | 2.35E+08 | KD2-H4K8ac_peak_3081 | 8.48181  | RP11-443B7.1_ENSG00000238005                    |
| 1 | 235105520 | 2.35E+08 | KD2-H4K8ac_peak_3082 | 16.68991 | RP11-443B7.1_ENSG00000238005                    |
| 1 | 235106558 | 2.35E+08 | KD2-H4K8ac_peak_3083 | 10.45683 | RP11-443B7.1_ENSG00000238005                    |
| 1 | 235133301 | 2.35E+08 | KD2-H4K8ac_peak_3084 | 7.84589  |                                                 |
| 1 | 235184155 | 2.35E+08 | KD2-H4K8ac_peak_3085 | 7.28827  |                                                 |
| 1 | 235246768 | 2.35E+08 | KD2-H4K8ac_peak_3086 | 7.49599  |                                                 |
| 1 | 235291717 | 2.35E+08 | KD2-H4K8ac_peak_3087 | 11.7608  | TOMM20_ENSG00000173726;SNORA14B_ENSG00000207181 |
| 1 | 235292439 | 2.35E+08 | KD2-H4K8ac_peak_3088 | 12.36441 | TOMM20_ENSG00000173726                          |
| 1 | 235491038 | 2.35E+08 | KD2-H4K8ac_peak_3089 | 13.95627 | ARID4B_ENSG00000054267;GGPS1_ENSG00000152904    |
| 1 | 235493429 | 2.35E+08 | KD2-H4K8ac_peak_3090 | 14.1139  |                                                 |
| 1 | 235668146 | 2.36E+08 | KD2-H4K8ac_peak_3091 | 20.30085 | B3GALNT2_ENSG00000162885                        |
| 1 | 235711761 | 2.36E+08 | KD2-H4K8ac_peak_3092 | 11.55418 |                                                 |
| 1 | 235713516 | 2.36E+08 | KD2-H4K8ac_peak_3093 | 11.04256 |                                                 |
| 1 | 235714259 | 2.36E+08 | KD2-H4K8ac_peak_3094 | 6.84261  |                                                 |
| 1 | 235715427 | 2.36E+08 | KD2-H4K8ac_peak_3095 | 9.20193  |                                                 |
| 1 | 235716988 | 2.36E+08 | KD2-H4K8ac_peak_3096 | 9.63487  |                                                 |
| 1 | 235812226 | 2.36E+08 | KD2-H4K8ac_peak_3097 | 10.53377 | GNG4_ENSG00000168243                            |
| 1 | 235813645 | 2.36E+08 | KD2-H4K8ac_peak_3098 | 19.71728 | GNG4_ENSG00000168243                            |
| 1 | 236029924 | 2.36E+08 | KD2-H4K8ac_peak_3099 | 7.07117  |                                                 |
| 1 | 236030546 | 2.36E+08 | KD2-H4K8ac_peak_3100 | 6.20982  |                                                 |
| 1 | 236081401 | 2.36E+08 | KD2-H4K8ac_peak_3101 | 7.49599  |                                                 |
| 1 | 236082137 | 2.36E+08 | KD2-H4K8ac_peak_3102 | 7.93664  |                                                 |
| 1 | 236134766 | 2.36E+08 | KD2-H4K8ac_peak_3103 | 8.55271  | RP4-580N22.2_ENSG00000229291                    |
| 1 | 236135374 | 2.36E+08 | KD2-H4K8ac_peak_3104 | 11.09936 | RP4-580N22.2_ENSG00000229291                    |
| 1 | 236227017 | 2.36E+08 | KD2-H4K8ac_peak_3105 | 16.53429 | NID1_ENSG00000116962                            |
| 1 | 236263169 | 2.36E+08 | KD2-H4K8ac_peak_3106 | 4.8888   |                                                 |
| 1 | 236292137 | 2.36E+08 | KD2-H4K8ac_peak_3107 | 5.1628   |                                                 |
| 1 | 236304735 | 2.36E+08 | KD2-H4K8ac_peak_3108 | 11.89502 | GPR137B_ENSG00000077585                         |
| 1 | 236305797 | 2.36E+08 | KD2-H4K8ac_peak_3109 | 7.07117  | GPR137B_ENSG00000077585                         |
| 1 | 236558606 | 2.37E+08 | KD2-H4K8ac_peak_3110 | 10.29842 |                                                 |
| 1 | 236686557 | 2.37E+08 | KD2-H4K8ac_peak_3111 | 20.96279 | LGALS8-AS1_ENSG00000223776                      |
| 1 | 236767939 | 2.37E+08 | KD2-H4K8ac_peak_3112 | 12.82393 | HEATR1_ENSG00000119285                          |
| 1 | 236849344 | 2.37E+08 | KD2-H4K8ac_peak_3113 | 23.33626 | ACTN2_ENSG00000077522                           |
| 1 | 236958004 | 2.37E+08 | KD2-H4K8ac_peak_3114 | 6.35843  | MTR_ENSG00000116984                             |
| 1 | 236958682 | 2.37E+08 | KD2-H4K8ac_peak_3115 | 11.3923  | MTR_ENSG00000116984                             |
| 1 | 237056241 | 2.37E+08 | KD2-H4K8ac_peak_3116 | 6.99815  |                                                 |
| 1 | 237057534 | 2.37E+08 | KD2-H4K8ac_peak_3117 | 8.58725  |                                                 |
| 1 | 237058520 | 2.37E+08 | KD2-H4K8ac_peak_3118 | 16.62311 |                                                 |
| 1 | 237176214 | 2.37E+08 | KD2-H4K8ac_peak_3119 | 4.77079  |                                                 |
| 1 | 237205405 | 2.37E+08 | KD2-H4K8ac_peak_3120 | 5.98692  | RYR2_ENSG00000198626                            |
| 1 | 237362514 | 2.37E+08 | KD2-H4K8ac_peak_3121 | 5.54647  |                                                 |
| 1 | 237875326 | 2.38E+08 | KD2-H4K8ac_peak_3122 | 11.75669 |                                                 |
| 1 | 237963017 | 2.38E+08 | KD2-H4K8ac_peak_3123 | 9.50015  |                                                 |
| 1 | 237997733 | 2.38E+08 | KD2-H4K8ac_peak_3124 | 3.71956  |                                                 |
| 1 | 238027837 | 2.38E+08 | KD2-H4K8ac_peak_3125 | 9.57101  |                                                 |
| 1 | 238182059 | 2.38E+08 | KD2-H4K8ac_peak_3126 | 5.75452  |                                                 |



|   |           |          |                      |          |                                                         |
|---|-----------|----------|----------------------|----------|---------------------------------------------------------|
| 1 | 238331077 | 2.38E+08 | KD2-H4K8ac_peak_3127 | 3.75035  |                                                         |
| 1 | 238434502 | 2.38E+08 | KD2-H4K8ac_peak_3128 | 8.17902  |                                                         |
| 1 | 238580505 | 2.39E+08 | KD2-H4K8ac_peak_3129 | 5.13341  |                                                         |
| 1 | 238623164 | 2.39E+08 | KD2-H4K8ac_peak_3130 | 3.75035  |                                                         |
| 1 | 238627884 | 2.39E+08 | KD2-H4K8ac_peak_3131 | 6.83936  |                                                         |
| 1 | 238629816 | 2.39E+08 | KD2-H4K8ac_peak_3132 | 7.65815  |                                                         |
| 1 | 238634781 | 2.39E+08 | KD2-H4K8ac_peak_3133 | 5.29555  |                                                         |
| 1 | 238642439 | 2.39E+08 | KD2-H4K8ac_peak_3134 | 4.77079  |                                                         |
| 1 | 238648717 | 2.39E+08 | KD2-H4K8ac_peak_3135 | 4.98072  | LINC01139_ENSG00000215808;RP11-177F15.1_ENSG00000231877 |
| 1 | 238864425 | 2.39E+08 | KD2-H4K8ac_peak_3136 | 6.00243  |                                                         |
| 1 | 239351425 | 2.39E+08 | KD2-H4K8ac_peak_3137 | 6.47962  |                                                         |
| 1 | 239429615 | 2.39E+08 | KD2-H4K8ac_peak_3138 | 7.94441  |                                                         |
| 1 | 239520420 | 2.4E+08  | KD2-H4K8ac_peak_3139 | 10.05606 |                                                         |
| 1 | 239521851 | 2.4E+08  | KD2-H4K8ac_peak_3140 | 9.11031  |                                                         |
| 1 | 239549484 | 2.4E+08  | KD2-H4K8ac_peak_3141 | 5.9696   | CHRM3_ENSG00000133019                                   |
| 1 | 239550019 | 2.4E+08  | KD2-H4K8ac_peak_3142 | 8.16906  | CHRM3_ENSG00000133019                                   |
| 1 | 239573865 | 2.4E+08  | KD2-H4K8ac_peak_3143 | 4.46868  |                                                         |
| 1 | 239587187 | 2.4E+08  | KD2-H4K8ac_peak_3144 | 5.57044  |                                                         |
| 1 | 239634963 | 2.4E+08  | KD2-H4K8ac_peak_3145 | 5.14125  |                                                         |
| 1 | 239688449 | 2.4E+08  | KD2-H4K8ac_peak_3146 | 5.42867  |                                                         |
| 1 | 239796379 | 2.4E+08  | KD2-H4K8ac_peak_3147 | 5.30799  |                                                         |
| 1 | 239993772 | 2.4E+08  | KD2-H4K8ac_peak_3148 | 10.96455 |                                                         |
| 1 | 239995485 | 2.4E+08  | KD2-H4K8ac_peak_3149 | 14.88282 |                                                         |
| 1 | 239996347 | 2.4E+08  | KD2-H4K8ac_peak_3150 | 11.79585 |                                                         |
| 1 | 239999258 | 2.4E+08  | KD2-H4K8ac_peak_3151 | 7.76329  |                                                         |
| 1 | 239999864 | 2.4E+08  | KD2-H4K8ac_peak_3152 | 9.11031  |                                                         |
| 1 | 240001612 | 2.4E+08  | KD2-H4K8ac_peak_3153 | 6.30626  |                                                         |
| 1 | 240002338 | 2.4E+08  | KD2-H4K8ac_peak_3154 | 6.66692  |                                                         |
| 1 | 240004222 | 2.4E+08  | KD2-H4K8ac_peak_3155 | 5.82799  |                                                         |
| 1 | 240005508 | 2.4E+08  | KD2-H4K8ac_peak_3156 | 5.59859  |                                                         |
| 1 | 240006101 | 2.4E+08  | KD2-H4K8ac_peak_3157 | 6.36375  |                                                         |
| 1 | 240008651 | 2.4E+08  | KD2-H4K8ac_peak_3158 | 5.08628  |                                                         |
| 1 | 240010930 | 2.4E+08  | KD2-H4K8ac_peak_3159 | 6.30626  |                                                         |
| 1 | 240031167 | 2.4E+08  | KD2-H4K8ac_peak_3160 | 8.16906  |                                                         |
| 1 | 240032290 | 2.4E+08  | KD2-H4K8ac_peak_3161 | 10.20046 |                                                         |
| 1 | 240033800 | 2.4E+08  | KD2-H4K8ac_peak_3162 | 6.67092  |                                                         |
| 1 | 240035386 | 2.4E+08  | KD2-H4K8ac_peak_3163 | 4.86324  |                                                         |
| 1 | 240037019 | 2.4E+08  | KD2-H4K8ac_peak_3164 | 7.42964  |                                                         |
| 1 | 240038048 | 2.4E+08  | KD2-H4K8ac_peak_3165 | 6.66692  |                                                         |
| 1 | 240042186 | 2.4E+08  | KD2-H4K8ac_peak_3166 | 11.8457  |                                                         |
| 1 | 240044081 | 2.4E+08  | KD2-H4K8ac_peak_3167 | 6.66359  |                                                         |
| 1 | 240051578 | 2.4E+08  | KD2-H4K8ac_peak_3168 | 8.23274  |                                                         |
| 1 | 240052184 | 2.4E+08  | KD2-H4K8ac_peak_3169 | 11.41236 |                                                         |
| 1 | 240054264 | 2.4E+08  | KD2-H4K8ac_peak_3170 | 13.38928 |                                                         |
| 1 | 240056682 | 2.4E+08  | KD2-H4K8ac_peak_3171 | 6.25869  |                                                         |
| 1 | 240057970 | 2.4E+08  | KD2-H4K8ac_peak_3172 | 10.29842 |                                                         |

|   |           |          |                      |          |                                                |
|---|-----------|----------|----------------------|----------|------------------------------------------------|
| 1 | 240059138 | 2.4E+08  | KD2-H4K8ac_peak_3173 | 12.73749 |                                                |
| 1 | 240060338 | 2.4E+08  | KD2-H4K8ac_peak_3174 | 12.93253 |                                                |
| 1 | 240060899 | 2.4E+08  | KD2-H4K8ac_peak_3175 | 6.60096  |                                                |
| 1 | 240160803 | 2.4E+08  | KD2-H4K8ac_peak_3176 | 7.36799  |                                                |
| 1 | 240627970 | 2.41E+08 | KD2-H4K8ac_peak_3177 | 6.86812  |                                                |
| 1 | 241136913 | 2.41E+08 | KD2-H4K8ac_peak_3178 | 6.25869  |                                                |
| 1 | 241520103 | 2.42E+08 | KD2-H4K8ac_peak_3179 | 9.36516  | RGS7_ENSG00000182901                           |
| 1 | 241587151 | 2.42E+08 | KD2-H4K8ac_peak_3180 | 24.00712 | RP11-527D7.1_ENSG00000225554                   |
| 1 | 241803151 | 2.42E+08 | KD2-H4K8ac_peak_3181 | 18.37277 |                                                |
| 1 | 241803819 | 2.42E+08 | KD2-H4K8ac_peak_3182 | 15.61313 |                                                |
| 1 | 242010393 | 2.42E+08 | KD2-H4K8ac_peak_3183 | 5.20908  | EXO1_ENSG00000174371                           |
| 1 | 242011226 | 2.42E+08 | KD2-H4K8ac_peak_3184 | 12.85233 | EXO1_ENSG00000174371                           |
| 1 | 242134229 | 2.42E+08 | KD2-H4K8ac_peak_3185 | 6.36375  |                                                |
| 1 | 242135425 | 2.42E+08 | KD2-H4K8ac_peak_3186 | 9.36516  |                                                |
| 1 | 242137235 | 2.42E+08 | KD2-H4K8ac_peak_3187 | 6.03353  |                                                |
| 1 | 242294910 | 2.42E+08 | KD2-H4K8ac_peak_3188 | 5.95537  |                                                |
| 1 | 242588975 | 2.43E+08 | KD2-H4K8ac_peak_3189 | 6.20982  |                                                |
| 1 | 242589459 | 2.43E+08 | KD2-H4K8ac_peak_3190 | 5.59859  |                                                |
| 1 | 242591351 | 2.43E+08 | KD2-H4K8ac_peak_3191 | 9.96798  |                                                |
| 1 | 242592163 | 2.43E+08 | KD2-H4K8ac_peak_3192 | 10.96455 |                                                |
| 1 | 242597104 | 2.43E+08 | KD2-H4K8ac_peak_3193 | 6.33462  |                                                |
| 1 | 242612425 | 2.43E+08 | KD2-H4K8ac_peak_3194 | 9.63487  |                                                |
| 1 | 242623063 | 2.43E+08 | KD2-H4K8ac_peak_3195 | 8.59301  |                                                |
| 1 | 242687085 | 2.43E+08 | KD2-H4K8ac_peak_3196 | 6.20982  | PLD5_ENSG00000180287                           |
| 1 | 242688474 | 2.43E+08 | KD2-H4K8ac_peak_3197 | 15.84211 | PLD5_ENSG00000180287                           |
| 1 | 242937638 | 2.43E+08 | KD2-H4K8ac_peak_3198 | 5.57044  |                                                |
| 1 | 243417683 | 2.43E+08 | KD2-H4K8ac_peak_3199 | 6.30229  | CEP170_ENSG00000143702                         |
| 1 | 243418167 | 2.43E+08 | KD2-H4K8ac_peak_3200 | 6.52179  | CEP170_ENSG00000143702;SDCCAG8_ENSG00000054282 |
| 1 | 243419407 | 2.43E+08 | KD2-H4K8ac_peak_3201 | 12.65012 | CEP170_ENSG00000143702;SDCCAG8_ENSG00000054282 |
| 1 | 243584588 | 2.44E+08 | KD2-H4K8ac_peak_3202 | 4.67342  |                                                |
| 1 | 243585023 | 2.44E+08 | KD2-H4K8ac_peak_3203 | 7.67504  |                                                |
| 1 | 243645700 | 2.44E+08 | KD2-H4K8ac_peak_3204 | 9.20193  |                                                |
| 1 | 243647156 | 2.44E+08 | KD2-H4K8ac_peak_3205 | 4.67342  |                                                |
| 1 | 243654103 | 2.44E+08 | KD2-H4K8ac_peak_3206 | 4.33139  |                                                |
| 1 | 243656087 | 2.44E+08 | KD2-H4K8ac_peak_3207 | 7.92932  |                                                |
| 1 | 243658441 | 2.44E+08 | KD2-H4K8ac_peak_3208 | 9.39486  |                                                |
| 1 | 243659900 | 2.44E+08 | KD2-H4K8ac_peak_3209 | 20.0792  |                                                |
| 1 | 244012882 | 2.44E+08 | KD2-H4K8ac_peak_3210 | 5.75757  |                                                |
| 1 | 244013787 | 2.44E+08 | KD2-H4K8ac_peak_3211 | 24.3087  | AKT3_ENSG00000117020                           |
| 1 | 244046257 | 2.44E+08 | KD2-H4K8ac_peak_3212 | 6.9809   |                                                |
| 1 | 244080170 | 2.44E+08 | KD2-H4K8ac_peak_3213 | 18.24798 | RP11-278H7.1_ENSG00000226828                   |
| 1 | 244211064 | 2.44E+08 | KD2-H4K8ac_peak_3214 | 8.4716   |                                                |
| 1 | 244212159 | 2.44E+08 | KD2-H4K8ac_peak_3215 | 21.55474 |                                                |
| 1 | 244212757 | 2.44E+08 | KD2-H4K8ac_peak_3216 | 12.60983 |                                                |
| 1 | 244318461 | 2.44E+08 | KD2-H4K8ac_peak_3217 | 10.96455 |                                                |
| 1 | 244394440 | 2.44E+08 | KD2-H4K8ac_peak_3218 | 14.92369 |                                                |

|   |           |          |                      |          |                                                     |
|---|-----------|----------|----------------------|----------|-----------------------------------------------------|
| 1 | 244419484 | 2.44E+08 | KD2-H4K8ac_peak_3219 | 5.72327  |                                                     |
| 1 | 244435875 | 2.44E+08 | KD2-H4K8ac_peak_3220 | 7.40314  |                                                     |
| 1 | 244614393 | 2.45E+08 | KD2-H4K8ac_peak_3221 | 21.2844  | ADSS_ENSG00000035687                                |
| 1 | 244615921 | 2.45E+08 | KD2-H4K8ac_peak_3222 | 6.66692  | ADSS_ENSG00000035687                                |
| 1 | 244624003 | 2.45E+08 | KD2-H4K8ac_peak_3223 | 5.94405  |                                                     |
| 1 | 244624464 | 2.45E+08 | KD2-H4K8ac_peak_3224 | 22.03039 |                                                     |
| 1 | 244816507 | 2.45E+08 | KD2-H4K8ac_peak_3225 | 11.8457  | DESI2_ENSG00000121644                               |
| 1 | 244996619 | 2.45E+08 | KD2-H4K8ac_peak_3226 | 18.3598  |                                                     |
| 1 | 244997736 | 2.45E+08 | KD2-H4K8ac_peak_3227 | 10.46874 | COX20_ENSG00000203667                               |
| 1 | 245026809 | 2.45E+08 | KD2-H4K8ac_peak_3228 | 16.81258 | HNRNPU_ENSG00000153187;RP11-11N7.4_ENSG00000273175  |
| 1 | 245028074 | 2.45E+08 | KD2-H4K8ac_peak_3229 | 9.18237  | HNRNPU_ENSG00000153187;RP11-11N7.4_ENSG00000273175  |
| 1 | 245127645 | 2.45E+08 | KD2-H4K8ac_peak_3230 | 7.47462  |                                                     |
| 1 | 245131655 | 2.45E+08 | KD2-H4K8ac_peak_3231 | 12.05219 | EFCAB2_ENSG00000203666                              |
| 1 | 245133062 | 2.45E+08 | KD2-H4K8ac_peak_3232 | 30.41045 | RP11-156E8.1_ENSG00000272195;EFCAB2_ENSG00000203666 |
| 1 | 245135587 | 2.45E+08 | KD2-H4K8ac_peak_3233 | 6.65673  |                                                     |
| 1 | 245316578 | 2.45E+08 | KD2-H4K8ac_peak_3234 | 17.51891 | KIF26B_ENSG00000162849                              |
| 1 | 245318802 | 2.45E+08 | KD2-H4K8ac_peak_3235 | 11.86355 | KIF26B_ENSG00000162849                              |
| 1 | 245320079 | 2.45E+08 | KD2-H4K8ac_peak_3236 | 14.30326 |                                                     |
| 1 | 245365720 | 2.45E+08 | KD2-H4K8ac_peak_3237 | 7.44324  |                                                     |
| 1 | 245398022 | 2.45E+08 | KD2-H4K8ac_peak_3238 | 6.66692  | RP11-62I21.1_ENSG00000232192                        |
| 1 | 245403237 | 2.45E+08 | KD2-H4K8ac_peak_3239 | 4.67342  |                                                     |
| 1 | 245431378 | 2.45E+08 | KD2-H4K8ac_peak_3240 | 4.77079  |                                                     |
| 1 | 245473981 | 2.45E+08 | KD2-H4K8ac_peak_3241 | 8.46569  |                                                     |
| 1 | 245501971 | 2.46E+08 | KD2-H4K8ac_peak_3242 | 6.24114  |                                                     |
| 1 | 245508234 | 2.46E+08 | KD2-H4K8ac_peak_3243 | 4.211    |                                                     |
| 1 | 245534350 | 2.46E+08 | KD2-H4K8ac_peak_3244 | 6.55245  | AL359983.1_ENSG00000221165                          |
| 1 | 245593062 | 2.46E+08 | KD2-H4K8ac_peak_3245 | 3.67045  |                                                     |
| 1 | 245613234 | 2.46E+08 | KD2-H4K8ac_peak_3246 | 7.47462  |                                                     |
| 1 | 245735550 | 2.46E+08 | KD2-H4K8ac_peak_3247 | 8.30974  |                                                     |
| 1 | 245751682 | 2.46E+08 | KD2-H4K8ac_peak_3248 | 7.53715  |                                                     |
| 1 | 245753388 | 2.46E+08 | KD2-H4K8ac_peak_3249 | 12.82393 |                                                     |
| 1 | 245768565 | 2.46E+08 | KD2-H4K8ac_peak_3250 | 5.3157   |                                                     |
| 1 | 245769231 | 2.46E+08 | KD2-H4K8ac_peak_3251 | 7.44247  |                                                     |
| 1 | 245771337 | 2.46E+08 | KD2-H4K8ac_peak_3252 | 5.18791  |                                                     |
| 1 | 245777684 | 2.46E+08 | KD2-H4K8ac_peak_3253 | 4.44527  | RP11-522M21.2_ENSG00000238224                       |
| 1 | 245846743 | 2.46E+08 | KD2-H4K8ac_peak_3254 | 7.28628  |                                                     |
| 1 | 245847880 | 2.46E+08 | KD2-H4K8ac_peak_3255 | 6.86985  |                                                     |
| 1 | 245848445 | 2.46E+08 | KD2-H4K8ac_peak_3256 | 4.06758  |                                                     |
| 1 | 245914941 | 2.46E+08 | KD2-H4K8ac_peak_3257 | 10.21366 |                                                     |
| 1 | 245916779 | 2.46E+08 | KD2-H4K8ac_peak_3258 | 5.20908  |                                                     |
| 1 | 245953678 | 2.46E+08 | KD2-H4K8ac_peak_3259 | 6.66359  |                                                     |
| 1 | 245956726 | 2.46E+08 | KD2-H4K8ac_peak_3260 | 4.86324  |                                                     |
| 1 | 245971630 | 2.46E+08 | KD2-H4K8ac_peak_3261 | 5.405    |                                                     |
| 1 | 245973634 | 2.46E+08 | KD2-H4K8ac_peak_3262 | 4.67342  |                                                     |
| 1 | 246032990 | 2.46E+08 | KD2-H4K8ac_peak_3263 | 5.81222  |                                                     |
| 1 | 246033468 | 2.46E+08 | KD2-H4K8ac_peak_3264 | 4.44527  |                                                     |

|    |           |          |                      |          |                                                   |
|----|-----------|----------|----------------------|----------|---------------------------------------------------|
| 1  | 246034490 | 2.46E+08 | KD2-H4K8ac_peak_3265 | 10.19949 |                                                   |
| 1  | 246037001 | 2.46E+08 | KD2-H4K8ac_peak_3266 | 9.57101  |                                                   |
| 1  | 246037707 | 2.46E+08 | KD2-H4K8ac_peak_3267 | 11.8696  |                                                   |
| 1  | 246039189 | 2.46E+08 | KD2-H4K8ac_peak_3268 | 11.24702 |                                                   |
| 1  | 246040142 | 2.46E+08 | KD2-H4K8ac_peak_3269 | 4.86324  |                                                   |
| 1  | 246158216 | 2.46E+08 | KD2-H4K8ac_peak_3270 | 8.23274  |                                                   |
| 1  | 246159021 | 2.46E+08 | KD2-H4K8ac_peak_3271 | 5.88845  |                                                   |
| 1  | 246198793 | 2.46E+08 | KD2-H4K8ac_peak_3272 | 6.30229  |                                                   |
| 1  | 246447416 | 2.46E+08 | KD2-H4K8ac_peak_3273 | 5.49367  |                                                   |
| 1  | 246670080 | 2.47E+08 | KD2-H4K8ac_peak_3274 | 5.30799  | SMYD3_ENSG00000185420                             |
| 1  | 246670716 | 2.47E+08 | KD2-H4K8ac_peak_3275 | 9.44423  | SMYD3_ENSG00000185420                             |
| 1  | 246673579 | 2.47E+08 | KD2-H4K8ac_peak_3276 | 6.25869  |                                                   |
| 1  | 246822154 | 2.47E+08 | KD2-H4K8ac_peak_3277 | 3.65228  |                                                   |
| 1  | 246853003 | 2.47E+08 | KD2-H4K8ac_peak_3278 | 18.14936 | RP11-439E19.7_ENSG00000235021                     |
| 1  | 246862060 | 2.47E+08 | KD2-H4K8ac_peak_3279 | 7.07117  |                                                   |
| 1  | 246887039 | 2.47E+08 | KD2-H4K8ac_peak_3280 | 13.10368 | SCCPDH_ENSG00000143653                            |
| 1  | 246956783 | 2.47E+08 | KD2-H4K8ac_peak_3281 | 8.30114  |                                                   |
| 1  | 246958249 | 2.47E+08 | KD2-H4K8ac_peak_3282 | 6.45083  |                                                   |
| 1  | 247043609 | 2.47E+08 | KD2-H4K8ac_peak_3283 | 5.57044  |                                                   |
| 1  | 247094878 | 2.47E+08 | KD2-H4K8ac_peak_3284 | 14.39182 | AHCTF1_ENSG00000153207                            |
| 1  | 247095712 | 2.47E+08 | KD2-H4K8ac_peak_3285 | 6.99194  | AHCTF1_ENSG00000153207                            |
| 1  | 247170910 | 2.47E+08 | KD2-H4K8ac_peak_3286 | 12.08081 | ZNF695_ENSG00000197472                            |
| 1  | 247171784 | 2.47E+08 | KD2-H4K8ac_peak_3287 | 9.95119  | ZNF695_ENSG00000197472                            |
| 1  | 247241595 | 2.47E+08 | KD2-H4K8ac_peak_3288 | 10.52259 | ZNF670_ENSG00000135747                            |
| 1  | 247267099 | 2.47E+08 | KD2-H4K8ac_peak_3289 | 18.64825 | ZNF669_ENSG00000188295                            |
| 1  | 247274336 | 2.47E+08 | KD2-H4K8ac_peak_3290 | 18.48145 | C1orf229_ENSG00000221953                          |
| 1  | 247494459 | 2.47E+08 | KD2-H4K8ac_peak_3291 | 12.92667 | ZNF496_ENSG00000162714                            |
| 1  | 247495389 | 2.47E+08 | KD2-H4K8ac_peak_3292 | 21.9832  | ZNF496_ENSG00000162714                            |
| 1  | 249119624 | 2.49E+08 | KD2-H4K8ac_peak_3293 | 5.14125  | SH3BP5L_ENSG00000175137;MIR3124_ENSG00000264500   |
| 1  | 249120539 | 2.49E+08 | KD2-H4K8ac_peak_3294 | 9.36516  | SH3BP5L_ENSG00000175137;MIR3124_ENSG00000264500   |
| 1  | 249131634 | 2.49E+08 | KD2-H4K8ac_peak_3295 | 6.61376  | ZNF672_ENSG00000171161                            |
| 1  | 249132581 | 2.49E+08 | KD2-H4K8ac_peak_3296 | 17.83665 | ZNF672_ENSG00000171161                            |
| 1  | 249152169 | 2.49E+08 | KD2-H4K8ac_peak_3297 | 9.95119  | ZNF692_ENSG00000171163;AL672294.1_ENSG00000227237 |
| 1  | 249153385 | 2.49E+08 | KD2-H4K8ac_peak_3298 | 13.86993 | ZNF692_ENSG00000171163;AL672294.1_ENSG00000227237 |
| 1  | 249156940 | 2.49E+08 | KD2-H4K8ac_peak_3299 | 7.76329  |                                                   |
| 1  | 249157627 | 2.49E+08 | KD2-H4K8ac_peak_3300 | 22.5974  |                                                   |
| 1  | 249166804 | 2.49E+08 | KD2-H4K8ac_peak_3301 | 7.01964  |                                                   |
| 1  | 249167411 | 2.49E+08 | KD2-H4K8ac_peak_3302 | 3.97079  |                                                   |
| 1  | 249200346 | 2.49E+08 | KD2-H4K8ac_peak_3303 | 12.82393 | PGBD2_ENSG00000185220                             |
| 1  | 249201009 | 2.49E+08 | KD2-H4K8ac_peak_3304 | 10.0692  | PGBD2_ENSG00000185220                             |
| 10 | 122194    | 122514   | KD2-H4K8ac_peak_3305 | 5.9696   |                                                   |
| 10 | 180567    | 181997   | KD2-H4K8ac_peak_3306 | 14.66631 | ZMYND11_ENSG00000015171                           |
| 10 | 352710    | 352983   | KD2-H4K8ac_peak_3307 | 5.18447  |                                                   |
| 10 | 353731    | 353927   | KD2-H4K8ac_peak_3308 | 8.30094  |                                                   |
| 10 | 414609    | 414972   | KD2-H4K8ac_peak_3309 | 6.45083  |                                                   |
| 10 | 735232    | 735607   | KD2-H4K8ac_peak_3310 | 7.70289  | DIP2C_ENSG00000151240                             |

|    |         |         |                      |          |                                                   |
|----|---------|---------|----------------------|----------|---------------------------------------------------|
| 10 | 736178  | 736620  | KD2-H4K8ac_peak_3311 | 5.57044  | DIP2C_ENSG00000151240                             |
| 10 | 830762  | 831343  | KD2-H4K8ac_peak_3312 | 7.70289  |                                                   |
| 10 | 977094  | 977609  | KD2-H4K8ac_peak_3313 | 11.79585 | LARP4B_ENSG00000107929                            |
| 10 | 1016267 | 1016518 | KD2-H4K8ac_peak_3314 | 6.83936  |                                                   |
| 10 | 1017655 | 1017895 | KD2-H4K8ac_peak_3315 | 7.61026  |                                                   |
| 10 | 1033697 | 1034187 | KD2-H4K8ac_peak_3316 | 8.10216  | AL359878.1_ENSG00000205740;GTPBP4_ENSG00000107937 |
| 10 | 1034449 | 1034840 | KD2-H4K8ac_peak_3317 | 17.09315 | AL359878.1_ENSG00000205740;GTPBP4_ENSG00000107937 |
| 10 | 1095000 | 1095334 | KD2-H4K8ac_peak_3318 | 13.81781 | ID11_ENSG00000067064;WDR37_ENSG00000047056        |
| 10 | 1101847 | 1102048 | KD2-H4K8ac_peak_3319 | 4.54838  |                                                   |
| 10 | 1102243 | 1102602 | KD2-H4K8ac_peak_3320 | 14.8083  |                                                   |
| 10 | 1102827 | 1103154 | KD2-H4K8ac_peak_3321 | 12.93209 |                                                   |
| 10 | 1312587 | 1312890 | KD2-H4K8ac_peak_3322 | 10.0692  |                                                   |
| 10 | 1313284 | 1313628 | KD2-H4K8ac_peak_3323 | 8.28234  |                                                   |
| 10 | 1313918 | 1314174 | KD2-H4K8ac_peak_3324 | 10.44656 |                                                   |
| 10 | 1314650 | 1315205 | KD2-H4K8ac_peak_3325 | 16.32216 |                                                   |
| 10 | 1315520 | 1316486 | KD2-H4K8ac_peak_3326 | 22.00006 |                                                   |
| 10 | 1316767 | 1317717 | KD2-H4K8ac_peak_3327 | 9.11031  |                                                   |
| 10 | 1330724 | 1331252 | KD2-H4K8ac_peak_3328 | 5.34946  |                                                   |
| 10 | 1331646 | 1332141 | KD2-H4K8ac_peak_3329 | 16.11042 |                                                   |
| 10 | 1332480 | 1332853 | KD2-H4K8ac_peak_3330 | 10.05606 |                                                   |
| 10 | 1333288 | 1333923 | KD2-H4K8ac_peak_3331 | 12.06346 |                                                   |
| 10 | 1334145 | 1335090 | KD2-H4K8ac_peak_3332 | 13.56049 |                                                   |
| 10 | 1336247 | 1337295 | KD2-H4K8ac_peak_3333 | 11.79585 |                                                   |
| 10 | 1398427 | 1398706 | KD2-H4K8ac_peak_3334 | 6.66692  |                                                   |
| 10 | 1402799 | 1403001 | KD2-H4K8ac_peak_3335 | 5.88845  | RP11-398B16.2_ENSG00000233052                     |
| 10 | 1443950 | 1444936 | KD2-H4K8ac_peak_3336 | 4.86324  |                                                   |
| 10 | 1692641 | 1693120 | KD2-H4K8ac_peak_3337 | 6.85193  |                                                   |
| 10 | 1693484 | 1694228 | KD2-H4K8ac_peak_3338 | 7.36799  |                                                   |
| 10 | 1694909 | 1695548 | KD2-H4K8ac_peak_3339 | 6.25869  |                                                   |
| 10 | 2267817 | 2268230 | KD2-H4K8ac_peak_3340 | 8.1233   |                                                   |
| 10 | 2653846 | 2654317 | KD2-H4K8ac_peak_3341 | 5.15777  |                                                   |
| 10 | 3110141 | 3110744 | KD2-H4K8ac_peak_3342 | 7.40314  |                                                   |
| 10 | 3115483 | 3115688 | KD2-H4K8ac_peak_3343 | 8.83749  |                                                   |
| 10 | 3438315 | 3438564 | KD2-H4K8ac_peak_3344 | 10.0692  |                                                   |
| 10 | 3440416 | 3441220 | KD2-H4K8ac_peak_3345 | 8.2413   |                                                   |
| 10 | 3441912 | 3442114 | KD2-H4K8ac_peak_3346 | 4.52514  |                                                   |
| 10 | 3827837 | 3828165 | KD2-H4K8ac_peak_3347 | 6.25869  | KLF6_ENSG00000067082                              |
| 10 | 3929708 | 3930153 | KD2-H4K8ac_peak_3348 | 9.15069  |                                                   |
| 10 | 4857288 | 4857539 | KD2-H4K8ac_peak_3349 | 6.25869  |                                                   |
| 10 | 4867777 | 4868143 | KD2-H4K8ac_peak_3350 | 14.66631 |                                                   |
| 10 | 4868450 | 4869261 | KD2-H4K8ac_peak_3351 | 19.59051 |                                                   |
| 10 | 5625941 | 5626134 | KD2-H4K8ac_peak_3352 | 4.44748  |                                                   |
| 10 | 5632564 | 5633083 | KD2-H4K8ac_peak_3353 | 5.51783  |                                                   |
| 10 | 5633409 | 5633806 | KD2-H4K8ac_peak_3354 | 5.14125  |                                                   |
| 10 | 5637196 | 5637498 | KD2-H4K8ac_peak_3355 | 4.77079  | RP13-463N16.6_ENSG00000242147                     |
| 10 | 5637747 | 5637958 | KD2-H4K8ac_peak_3356 | 4.06758  | RP13-463N16.6_ENSG00000242147                     |

|    |         |         |                      |          |                                                                               |
|----|---------|---------|----------------------|----------|-------------------------------------------------------------------------------|
| 10 | 5641778 | 5641999 | KD2-H4K8ac_peak_3357 | 4.01115  |                                                                               |
| 10 | 5665056 | 5665314 | KD2-H4K8ac_peak_3358 | 9.92477  |                                                                               |
| 10 | 5708047 | 5708458 | KD2-H4K8ac_peak_3359 | 9.18237  | ASB13_ENSG00000196372                                                         |
| 10 | 5726095 | 5726515 | KD2-H4K8ac_peak_3360 | 7.12754  | FAM208B_ENSG00000108021                                                       |
| 10 | 5726861 | 5727252 | KD2-H4K8ac_peak_3361 | 11.92978 | FAM208B_ENSG00000108021                                                       |
| 10 | 5734467 | 5734836 | KD2-H4K8ac_peak_3362 | 8.79106  |                                                                               |
| 10 | 5855639 | 5856219 | KD2-H4K8ac_peak_3363 | 13.09607 | RP11-318E3.9_ENSG00000272764                                                  |
| 10 | 5873178 | 5873372 | KD2-H4K8ac_peak_3364 | 5.73839  |                                                                               |
| 10 | 5918947 | 5919183 | KD2-H4K8ac_peak_3365 | 6.14257  |                                                                               |
| 10 | 5931193 | 5931709 | KD2-H4K8ac_peak_3366 | 16.07006 | ANKRD16_ENSG00000134461;FBXO18_ENSG00000134452                                |
| 10 | 5932305 | 5932508 | KD2-H4K8ac_peak_3367 | 7.96322  | ANKRD16_ENSG00000134461;FBXO18_ENSG00000134452                                |
| 10 | 6131048 | 6131608 | KD2-H4K8ac_peak_3368 | 16.57619 | RBM17_ENSG00000134453                                                         |
| 10 | 6186601 | 6186953 | KD2-H4K8ac_peak_3369 | 4.42765  | PFKFB3_ENSG00000170525                                                        |
| 10 | 6244926 | 6245274 | KD2-H4K8ac_peak_3370 | 6.67092  | RP11-414H17.5_ENSG00000213994                                                 |
| 10 | 6245550 | 6245910 | KD2-H4K8ac_peak_3371 | 5.20908  | RP11-414H17.5_ENSG00000213994                                                 |
| 10 | 6253389 | 6254059 | KD2-H4K8ac_peak_3372 | 10.20046 |                                                                               |
| 10 | 6622376 | 6622859 | KD2-H4K8ac_peak_3373 | 7.47462  | PRKCQ_ENSG00000065675;PRKCQ-AS1_ENSG00000237943                               |
| 10 | 7289121 | 7289392 | KD2-H4K8ac_peak_3374 | 6.00243  |                                                                               |
| 10 | 7291001 | 7291304 | KD2-H4K8ac_peak_3375 | 4.70206  |                                                                               |
| 10 | 7293733 | 7293931 | KD2-H4K8ac_peak_3376 | 6.99815  |                                                                               |
| 10 | 7301267 | 7301613 | KD2-H4K8ac_peak_3377 | 8.30974  |                                                                               |
| 10 | 7305926 | 7306214 | KD2-H4K8ac_peak_3378 | 5.45396  |                                                                               |
| 10 | 7308200 | 7308452 | KD2-H4K8ac_peak_3379 | 4.42765  |                                                                               |
| 10 | 7319985 | 7320378 | KD2-H4K8ac_peak_3380 | 5.7068   |                                                                               |
| 10 | 7452797 | 7453396 | KD2-H4K8ac_peak_3381 | 10.35678 | SFMBT2_ENSG00000198879                                                        |
| 10 | 7486571 | 7486774 | KD2-H4K8ac_peak_3382 | 5.29352  |                                                                               |
| 10 | 7830211 | 7830466 | KD2-H4K8ac_peak_3383 | 10.17486 | KIN_ENSG00000151657;ATP5C1_ENSG00000165629                                    |
| 10 | 7860510 | 7860751 | KD2-H4K8ac_peak_3384 | 6.99815  | TAF3_ENSG00000165632                                                          |
| 10 | 8086784 | 8087115 | KD2-H4K8ac_peak_3385 | 6.99815  |                                                                               |
| 10 | 8089055 | 8089323 | KD2-H4K8ac_peak_3386 | 8.39745  |                                                                               |
| 10 | 8089589 | 8089852 | KD2-H4K8ac_peak_3387 | 3.75035  |                                                                               |
| 10 | 8090074 | 8090684 | KD2-H4K8ac_peak_3388 | 10.87093 |                                                                               |
| 10 | 8091071 | 8091344 | KD2-H4K8ac_peak_3389 | 8.83582  |                                                                               |
| 10 | 8091568 | 8094033 | KD2-H4K8ac_peak_3390 | 13.31016 | RP11-379F12.4_ENSG00000232638                                                 |
| 10 | 8095693 | 8096190 | KD2-H4K8ac_peak_3391 | 7.54952  | GATA3-AS1_ENSG00000197308;RP11-379F12.3_ENSG00000243350;GATA3_ENSG00000107485 |
| 10 | 8097007 | 8097335 | KD2-H4K8ac_peak_3392 | 8.5092   |                                                                               |
| 10 | 8097609 | 8098327 | KD2-H4K8ac_peak_3393 | 15.81711 |                                                                               |
| 10 | 8099323 | 8099542 | KD2-H4K8ac_peak_3394 | 4.8888   |                                                                               |
| 10 | 8100124 | 8101177 | KD2-H4K8ac_peak_3395 | 14.56955 |                                                                               |
| 10 | 8102289 | 8102481 | KD2-H4K8ac_peak_3396 | 7.1181   |                                                                               |
| 10 | 8103517 | 8104201 | KD2-H4K8ac_peak_3397 | 8.30974  |                                                                               |
| 10 | 8138582 | 8138892 | KD2-H4K8ac_peak_3398 | 5.29352  |                                                                               |
| 10 | 8154184 | 8154532 | KD2-H4K8ac_peak_3399 | 15.22643 |                                                                               |
| 10 | 8158126 | 8158702 | KD2-H4K8ac_peak_3400 | 11.03331 |                                                                               |
| 10 | 8159307 | 8160101 | KD2-H4K8ac_peak_3401 | 11.89502 |                                                                               |
| 10 | 8222768 | 8223002 | KD2-H4K8ac_peak_3402 | 5.18447  |                                                                               |

|    |          |          |                      |          |                                                       |
|----|----------|----------|----------------------|----------|-------------------------------------------------------|
| 10 | 8286658  | 8287319  | KD2-H4K8ac_peak_3403 | 12.80176 |                                                       |
| 10 | 8340824  | 8341256  | KD2-H4K8ac_peak_3404 | 5.30799  | RP5-1119O21.2_ENSG00000226861                         |
| 10 | 8342264  | 8343085  | KD2-H4K8ac_peak_3405 | 8.17902  |                                                       |
| 10 | 8374417  | 8374734  | KD2-H4K8ac_peak_3406 | 6.61376  |                                                       |
| 10 | 8486504  | 8486763  | KD2-H4K8ac_peak_3407 | 4.77079  |                                                       |
| 10 | 8683640  | 8683940  | KD2-H4K8ac_peak_3408 | 5.04237  |                                                       |
| 10 | 8781396  | 8781628  | KD2-H4K8ac_peak_3409 | 8.30974  |                                                       |
| 10 | 9280121  | 9280334  | KD2-H4K8ac_peak_3410 | 8.1233   |                                                       |
| 10 | 9280613  | 9280810  | KD2-H4K8ac_peak_3411 | 6.40683  |                                                       |
| 10 | 11653700 | 11654193 | KD2-H4K8ac_peak_3412 | 14.3374  | USP6NL_ENSG00000148429;RP11-138I18.1_ENSG00000271360  |
| 10 | 11784605 | 11784837 | KD2-H4K8ac_peak_3413 | 6.24114  | ECHDC3_ENSG00000134463                                |
| 10 | 11865451 | 11865736 | KD2-H4K8ac_peak_3414 | 6.97919  | PROSER2_ENSG00000148426                               |
| 10 | 12084303 | 12084732 | KD2-H4K8ac_peak_3415 | 5.30799  | UPF2_ENSG00000151461                                  |
| 10 | 12095853 | 12096248 | KD2-H4K8ac_peak_3416 | 7.47462  |                                                       |
| 10 | 12110333 | 12110552 | KD2-H4K8ac_peak_3417 | 6.13909  | DHTKD1_ENSG00000181192                                |
| 10 | 12111042 | 12111240 | KD2-H4K8ac_peak_3418 | 8.55271  | DHTKD1_ENSG00000181192                                |
| 10 | 12171219 | 12171420 | KD2-H4K8ac_peak_3419 | 8.59579  | SEC61A2_ENSG00000065665                               |
| 10 | 12238026 | 12238549 | KD2-H4K8ac_peak_3420 | 9.73431  | NUDT5_ENSG00000165609;CDC123_ENSG00000151465          |
| 10 | 12306445 | 12306883 | KD2-H4K8ac_peak_3421 | 7.13615  |                                                       |
| 10 | 12390701 | 12390948 | KD2-H4K8ac_peak_3422 | 5.1628   | CAMK1D_ENSG00000183049                                |
| 10 | 12391705 | 12392171 | KD2-H4K8ac_peak_3423 | 6.65673  | CAMK1D_ENSG00000183049                                |
| 10 | 12882068 | 12882327 | KD2-H4K8ac_peak_3424 | 6.0073   |                                                       |
| 10 | 13141023 | 13141239 | KD2-H4K8ac_peak_3425 | 4.42765  | CCDC3_ENSG00000151468;OPTN_ENSG00000123240            |
| 10 | 13141551 | 13141912 | KD2-H4K8ac_peak_3426 | 6.8836   | CCDC3_ENSG00000151468;OPTN_ENSG00000123240            |
| 10 | 13142245 | 13142752 | KD2-H4K8ac_peak_3427 | 9.15329  | CCDC3_ENSG00000151468;OPTN_ENSG00000123240            |
| 10 | 13341683 | 13342501 | KD2-H4K8ac_peak_3428 | 8.02571  |                                                       |
| 10 | 13344149 | 13344931 | KD2-H4K8ac_peak_3429 | 10.46264 | PHYH_ENSG00000107537                                  |
| 10 | 13388987 | 13390054 | KD2-H4K8ac_peak_3430 | 15.61313 | SEPHS1_ENSG00000086475                                |
| 10 | 13390437 | 13390903 | KD2-H4K8ac_peak_3431 | 14.84212 | SEPHS1_ENSG00000086475                                |
| 10 | 13392030 | 13392471 | KD2-H4K8ac_peak_3432 | 5.45396  |                                                       |
| 10 | 13481932 | 13482336 | KD2-H4K8ac_peak_3433 | 5.14125  |                                                       |
| 10 | 13571234 | 13571454 | KD2-H4K8ac_peak_3434 | 8.5781   | BEND7_ENSG00000165626;RP11-214D15.2_ENSG00000227175   |
| 10 | 13628968 | 13629293 | KD2-H4K8ac_peak_3435 | 10.65724 | PRPF18_ENSG00000165630                                |
| 10 | 13875984 | 13876218 | KD2-H4K8ac_peak_3436 | 6.47962  |                                                       |
| 10 | 13933098 | 13933346 | KD2-H4K8ac_peak_3437 | 7.27716  |                                                       |
| 10 | 13933584 | 13933790 | KD2-H4K8ac_peak_3438 | 8.55271  |                                                       |
| 10 | 13934099 | 13934304 | KD2-H4K8ac_peak_3439 | 13.13969 |                                                       |
| 10 | 14051734 | 14052124 | KD2-H4K8ac_peak_3440 | 7.71478  |                                                       |
| 10 | 14130897 | 14131397 | KD2-H4K8ac_peak_3441 | 14.74047 |                                                       |
| 10 | 14879578 | 14879959 | KD2-H4K8ac_peak_3442 | 15.39543 | CDNF_ENSG00000185267;HSPA14_ENSG00000187522           |
| 10 | 14880334 | 14881085 | KD2-H4K8ac_peak_3443 | 14.8083  | CDNF_ENSG00000185267;HSPA14_ENSG00000187522           |
| 10 | 14920216 | 14920582 | KD2-H4K8ac_peak_3444 | 14.45402 | RP11-398C13.6_ENSG00000272853;SUV39H2_ENSG00000152455 |
| 10 | 14920965 | 14921576 | KD2-H4K8ac_peak_3445 | 7.146    | RP11-398C13.6_ENSG00000272853;SUV39H2_ENSG00000152455 |
| 10 | 15000699 | 15001172 | KD2-H4K8ac_peak_3446 | 4.67342  | MEIG1_ENSG00000197889                                 |
| 10 | 15001392 | 15002009 | KD2-H4K8ac_peak_3447 | 9.34195  | MEIG1_ENSG00000197889                                 |
| 10 | 15002530 | 15002826 | KD2-H4K8ac_peak_3448 | 11.90231 |                                                       |

|    |          |          |                      |          |                                                    |
|----|----------|----------|----------------------|----------|----------------------------------------------------|
| 10 | 15139151 | 15139632 | KD2-H4K8ac_peak_3449 | 7.95563  | C10orf111_ENSG00000176236;RPP38_ENSG00000152464    |
| 10 | 15211268 | 15211493 | KD2-H4K8ac_peak_3450 | 4.67342  | NMT2_ENSG00000152465                               |
| 10 | 15412396 | 15413037 | KD2-H4K8ac_peak_3451 | 15.9336  | FAM171A1_ENSG00000148468                           |
| 10 | 15413458 | 15413668 | KD2-H4K8ac_peak_3452 | 8.17902  | FAM171A1_ENSG00000148468                           |
| 10 | 15901783 | 15902413 | KD2-H4K8ac_peak_3453 | 6.25869  | FAM188A_ENSG00000148481                            |
| 10 | 16562638 | 16563312 | KD2-H4K8ac_peak_3454 | 6.36375  | C1QL3_ENSG00000165985                              |
| 10 | 16985000 | 16985253 | KD2-H4K8ac_peak_3455 | 6.16888  |                                                    |
| 10 | 17071848 | 17072140 | KD2-H4K8ac_peak_3456 | 6.47635  |                                                    |
| 10 | 17243485 | 17243697 | KD2-H4K8ac_peak_3457 | 9.20193  | TRDMT1_ENSG00000107614                             |
| 10 | 17270276 | 17271073 | KD2-H4K8ac_peak_3458 | 19.1048  | VIM-AS1_ENSG00000229124;VIM_ENSG00000026025        |
| 10 | 17659571 | 17659969 | KD2-H4K8ac_peak_3459 | 7.1181   | PTPLA_ENSG00000165996                              |
| 10 | 17685958 | 17686157 | KD2-H4K8ac_peak_3460 | 7.69287  | RP11-390B4.5_ENSG00000260589;STAM_ENSG00000136738  |
| 10 | 18429437 | 18429870 | KD2-H4K8ac_peak_3461 | 7.76329  | CACNB2_ENSG00000165995                             |
| 10 | 18491895 | 18492236 | KD2-H4K8ac_peak_3462 | 10.21502 |                                                    |
| 10 | 18492554 | 18492757 | KD2-H4K8ac_peak_3463 | 4.01115  |                                                    |
| 10 | 18916456 | 18917070 | KD2-H4K8ac_peak_3464 | 11.15509 |                                                    |
| 10 | 18947656 | 18948093 | KD2-H4K8ac_peak_3465 | 6.40683  | ARL5B-AS1_ENSG00000152487;ARL5B_ENSG00000165997    |
| 10 | 18948393 | 18948851 | KD2-H4K8ac_peak_3466 | 13.80019 | ARL5B-AS1_ENSG00000152487;ARL5B_ENSG00000165997    |
| 10 | 20104683 | 20105053 | KD2-H4K8ac_peak_3467 | 7.95563  | PLXDC2_ENSG00000120594                             |
| 10 | 21150136 | 21150424 | KD2-H4K8ac_peak_3468 | 5.25071  |                                                    |
| 10 | 21179486 | 21179779 | KD2-H4K8ac_peak_3469 | 6.99815  |                                                    |
| 10 | 21246822 | 21247073 | KD2-H4K8ac_peak_3470 | 5.58333  |                                                    |
| 10 | 21352861 | 21353061 | KD2-H4K8ac_peak_3471 | 5.3778   |                                                    |
| 10 | 21389184 | 21389413 | KD2-H4K8ac_peak_3472 | 4.06758  |                                                    |
| 10 | 21462860 | 21463761 | KD2-H4K8ac_peak_3473 | 4.86324  | NEBL_ENSG00000078114;NEBL-AS1_ENSG000000231920     |
| 10 | 21651735 | 21652002 | KD2-H4K8ac_peak_3474 | 5.58333  |                                                    |
| 10 | 21785299 | 21785528 | KD2-H4K8ac_peak_3475 | 7.92775  | CASC10_ENSG00000204682;MIR1915_ENSG00000222071     |
| 10 | 21785805 | 21786028 | KD2-H4K8ac_peak_3476 | 9.34195  | CASC10_ENSG00000204682;MIR1915_ENSG00000222071     |
| 10 | 21805296 | 21806556 | KD2-H4K8ac_peak_3477 | 10.21366 |                                                    |
| 10 | 21808323 | 21808674 | KD2-H4K8ac_peak_3478 | 5.57044  |                                                    |
| 10 | 21813873 | 21814465 | KD2-H4K8ac_peak_3479 | 10.86378 | SKIDA1_ENSG00000180592                             |
| 10 | 21814724 | 21815510 | KD2-H4K8ac_peak_3480 | 7.76329  | SKIDA1_ENSG00000180592                             |
| 10 | 21815949 | 21816569 | KD2-H4K8ac_peak_3481 | 12.82393 |                                                    |
| 10 | 21822482 | 21822919 | KD2-H4K8ac_peak_3482 | 15.5861  | MLLT10_ENSG00000078403                             |
| 10 | 21823620 | 21823897 | KD2-H4K8ac_peak_3483 | 6.66692  | MLLT10_ENSG00000078403                             |
| 10 | 21874752 | 21874979 | KD2-H4K8ac_peak_3484 | 6.10699  |                                                    |
| 10 | 22518165 | 22518388 | KD2-H4K8ac_peak_3485 | 10.0692  |                                                    |
| 10 | 22541233 | 22542020 | KD2-H4K8ac_peak_3486 | 11.05467 |                                                    |
| 10 | 22604875 | 22605590 | KD2-H4K8ac_peak_3487 | 15.59774 | COMMD3_ENSG00000148444;COMMD3-BMI1_ENSG00000269897 |
| 10 | 22610189 | 22610720 | KD2-H4K8ac_peak_3488 | 14.66631 | BMI1_ENSG00000168283                               |
| 10 | 22624971 | 22625957 | KD2-H4K8ac_peak_3489 | 11.05467 |                                                    |
| 10 | 22629416 | 22630343 | KD2-H4K8ac_peak_3490 | 25.34026 | RP11-573G6.10_ENSG00000272366                      |
| 10 | 22634141 | 22634692 | KD2-H4K8ac_peak_3491 | 9.63487  | SPAG6_ENSG00000077327                              |
| 10 | 22764820 | 22765383 | KD2-H4K8ac_peak_3492 | 5.54647  |                                                    |
| 10 | 23003043 | 23004220 | KD2-H4K8ac_peak_3493 | 27.46046 | PIP4K2A_ENSG00000150867                            |
| 10 | 23183688 | 23183976 | KD2-H4K8ac_peak_3494 | 7.12754  |                                                    |



|    |          |          |                      |          |                                                          |
|----|----------|----------|----------------------|----------|----------------------------------------------------------|
| 10 | 23384500 | 23385073 | KD2-H4K8ac_peak_3495 | 16.8435  | MSRB2_ENSG00000148450                                    |
| 10 | 23400327 | 23400540 | KD2-H4K8ac_peak_3496 | 6.00226  |                                                          |
| 10 | 23632565 | 23632966 | KD2-H4K8ac_peak_3497 | 7.12754  | C10orf67_ENSG00000179133;RP11-371A19.2_ENSG00000224215   |
| 10 | 23727246 | 23727785 | KD2-H4K8ac_peak_3498 | 16.30236 | OTUD1_ENSG00000165312                                    |
| 10 | 24404468 | 24404692 | KD2-H4K8ac_peak_3499 | 6.16888  |                                                          |
| 10 | 24408472 | 24408745 | KD2-H4K8ac_peak_3500 | 6.16888  |                                                          |
| 10 | 24497954 | 24498181 | KD2-H4K8ac_peak_3501 | 11.43863 |                                                          |
| 10 | 24543902 | 24544576 | KD2-H4K8ac_peak_3502 | 16.61426 |                                                          |
| 10 | 25011555 | 25012486 | KD2-H4K8ac_peak_3503 | 19.94588 | ARHGAP21_ENSG00000107863                                 |
| 10 | 25012740 | 25012979 | KD2-H4K8ac_peak_3504 | 7.1181   | ARHGAP21_ENSG00000107863                                 |
| 10 | 25241003 | 25242080 | KD2-H4K8ac_peak_3505 | 14.66631 | PRTFDC1_ENSG00000099256;RP11-165A20.3_ENSG00000273107    |
| 10 | 26932234 | 26932436 | KD2-H4K8ac_peak_3506 | 5.25071  | LINC00202-2_ENSG00000231976;RP13-16H11.7_ENSG00000234296 |
| 10 | 26985798 | 26986531 | KD2-H4K8ac_peak_3507 | 7.76104  | PDSS1_ENSG00000148459                                    |
| 10 | 27388787 | 27389370 | KD2-H4K8ac_peak_3508 | 15.61313 | ANKRD26_ENSG00000107890                                  |
| 10 | 27443018 | 27443261 | KD2-H4K8ac_peak_3509 | 7.76329  | YME1L1_ENSG00000136758;MASTL_ENSG00000120539             |
| 10 | 27443756 | 27444056 | KD2-H4K8ac_peak_3510 | 13.73635 | YME1L1_ENSG00000136758;MASTL_ENSG00000120539             |
| 10 | 27528658 | 27528893 | KD2-H4K8ac_peak_3511 | 6.78242  |                                                          |
| 10 | 27619601 | 27619830 | KD2-H4K8ac_peak_3512 | 11.70505 |                                                          |
| 10 | 27634377 | 27634720 | KD2-H4K8ac_peak_3513 | 7.01964  |                                                          |
| 10 | 27637394 | 27637595 | KD2-H4K8ac_peak_3514 | 5.01262  |                                                          |
| 10 | 27639079 | 27639291 | KD2-H4K8ac_peak_3515 | 7.27716  | FAM210CP_ENSG00000213770                                 |
| 10 | 27792461 | 27792955 | KD2-H4K8ac_peak_3516 | 6.25869  | RAB18_ENSG00000099246                                    |
| 10 | 27793443 | 27793708 | KD2-H4K8ac_peak_3517 | 9.6247   | RAB18_ENSG00000099246                                    |
| 10 | 28759704 | 28759954 | KD2-H4K8ac_peak_3518 | 9.02573  |                                                          |
| 10 | 28821224 | 28821950 | KD2-H4K8ac_peak_3519 | 17.83665 | WAC-AS1_ENSG00000254635;WAC_ENSG00000095787              |
| 10 | 28822197 | 28822473 | KD2-H4K8ac_peak_3520 | 8.74596  | WAC-AS1_ENSG00000254635;WAC_ENSG00000095787              |
| 10 | 28822687 | 28823044 | KD2-H4K8ac_peak_3521 | 18.91876 |                                                          |
| 10 | 28957659 | 28958154 | KD2-H4K8ac_peak_3522 | 5.82799  | RNU6-1067P_ENSG00000207483                               |
| 10 | 28965832 | 28966150 | KD2-H4K8ac_peak_3523 | 7.36799  | BAMBI_ENSG00000095739                                    |
| 10 | 29095593 | 29096093 | KD2-H4K8ac_peak_3524 | 9.06703  | RP11-478H13.4_ENSG00000271220                            |
| 10 | 29097689 | 29098063 | KD2-H4K8ac_peak_3525 | 5.3778   |                                                          |
| 10 | 29346146 | 29346365 | KD2-H4K8ac_peak_3526 | 7.27716  |                                                          |
| 10 | 29390071 | 29390306 | KD2-H4K8ac_peak_3527 | 4.67342  |                                                          |
| 10 | 29401130 | 29401355 | KD2-H4K8ac_peak_3528 | 7.94441  |                                                          |
| 10 | 29402629 | 29402906 | KD2-H4K8ac_peak_3529 | 6.2781   |                                                          |
| 10 | 29403312 | 29403578 | KD2-H4K8ac_peak_3530 | 5.64449  |                                                          |
| 10 | 29489219 | 29489693 | KD2-H4K8ac_peak_3531 | 5.14125  |                                                          |
| 10 | 29555588 | 29555943 | KD2-H4K8ac_peak_3532 | 4.66652  |                                                          |
| 10 | 29607403 | 29607740 | KD2-H4K8ac_peak_3533 | 18.09077 |                                                          |
| 10 | 29608063 | 29608313 | KD2-H4K8ac_peak_3534 | 4.211    |                                                          |
| 10 | 29608526 | 29608721 | KD2-H4K8ac_peak_3535 | 4.01115  |                                                          |
| 10 | 29698205 | 29698789 | KD2-H4K8ac_peak_3536 | 6.99194  | PTCHD3P1_ENSG00000224597                                 |
| 10 | 29907400 | 29907903 | KD2-H4K8ac_peak_3537 | 6.31143  |                                                          |
| 10 | 29937724 | 29938018 | KD2-H4K8ac_peak_3538 | 4.3015   |                                                          |
| 10 | 30024012 | 30024815 | KD2-H4K8ac_peak_3539 | 9.63487  | SVIL_ENSG00000197321                                     |
| 10 | 30128707 | 30129143 | KD2-H4K8ac_peak_3540 | 5.54647  |                                                          |

|    |          |          |                      |          |                                                                                        |
|----|----------|----------|----------------------|----------|----------------------------------------------------------------------------------------|
| 10 | 30347727 | 30348478 | KD2-H4K8ac_peak_3541 | 11.15509 |                                                                                        |
| 10 | 30637784 | 30638183 | KD2-H4K8ac_peak_3542 | 7.47462  |                                                                                        |
| 10 | 30638480 | 30638780 | KD2-H4K8ac_peak_3543 | 11.89502 |                                                                                        |
| 10 | 30721981 | 30722719 | KD2-H4K8ac_peak_3544 | 10.7186  | MAP3K8_ENSG00000107968                                                                 |
| 10 | 30990399 | 30991342 | KD2-H4K8ac_peak_3545 | 9.19305  |                                                                                        |
| 10 | 30994454 | 30994992 | KD2-H4K8ac_peak_3546 | 6.34383  |                                                                                        |
| 10 | 31009075 | 31009440 | KD2-H4K8ac_peak_3547 | 6.40683  |                                                                                        |
| 10 | 31037603 | 31037804 | KD2-H4K8ac_peak_3548 | 5.14125  |                                                                                        |
| 10 | 31073810 | 31074289 | KD2-H4K8ac_peak_3549 | 15.61313 |                                                                                        |
| 10 | 31319966 | 31320797 | KD2-H4K8ac_peak_3550 | 11.30637 | ZNF438_ENSG00000183621                                                                 |
| 10 | 31321463 | 31321937 | KD2-H4K8ac_peak_3551 | 13.57066 | ZNF438_ENSG00000183621                                                                 |
| 10 | 31421943 | 31422658 | KD2-H4K8ac_peak_3552 | 9.1707   |                                                                                        |
| 10 | 31423322 | 31423747 | KD2-H4K8ac_peak_3553 | 11.92978 |                                                                                        |
| 10 | 31446698 | 31446947 | KD2-H4K8ac_peak_3554 | 9.11031  |                                                                                        |
| 10 | 31607572 | 31607918 | KD2-H4K8ac_peak_3555 | 7.38799  | ZEB1_ENSG00000148516                                                                   |
| 10 | 31608144 | 31608643 | KD2-H4K8ac_peak_3556 | 11.43353 | ZEB1-AS1_ENSG00000237036;ZEB1_ENSG00000148516                                          |
| 10 | 31608999 | 31609377 | KD2-H4K8ac_peak_3557 | 8.83582  | ZEB1-AS1_ENSG00000237036                                                               |
| 10 | 31871912 | 31872138 | KD2-H4K8ac_peak_3558 | 10.46874 |                                                                                        |
| 10 | 31873377 | 31873825 | KD2-H4K8ac_peak_3559 | 17.70837 |                                                                                        |
| 10 | 31891777 | 31892402 | KD2-H4K8ac_peak_3560 | 10.66719 |                                                                                        |
| 10 | 31892806 | 31893084 | KD2-H4K8ac_peak_3561 | 12.00597 | RP11-472N13.2_ENSG00000223834                                                          |
| 10 | 31937728 | 31937944 | KD2-H4K8ac_peak_3562 | 7.47462  |                                                                                        |
| 10 | 31938511 | 31938819 | KD2-H4K8ac_peak_3563 | 8.02571  |                                                                                        |
| 10 | 32038256 | 32039593 | KD2-H4K8ac_peak_3564 | 18.41184 |                                                                                        |
| 10 | 32063534 | 32064063 | KD2-H4K8ac_peak_3565 | 4.42765  |                                                                                        |
| 10 | 32217396 | 32217670 | KD2-H4K8ac_peak_3566 | 12.74171 | ARHGAP12_ENSG00000165322                                                               |
| 10 | 32344516 | 32345260 | KD2-H4K8ac_peak_3567 | 9.08816  | KIF5B_ENSG00000170759;Y_RNA_ENSG00000206660                                            |
| 10 | 32635390 | 32636580 | KD2-H4K8ac_peak_3568 | 43.23227 | RP11-135A24.4_ENSG00000233825;AL391839.1_ENSG00000222309;RP11-135A24.2_ENSG00000229327 |
| 10 | 32733994 | 32734235 | KD2-H4K8ac_peak_3569 | 7.12754  | CCDC7_ENSG00000216937                                                                  |
| 10 | 32735177 | 32735655 | KD2-H4K8ac_peak_3570 | 7.96322  | CCDC7_ENSG00000216937                                                                  |
| 10 | 33246369 | 33247141 | KD2-H4K8ac_peak_3571 | 9.15329  | RP11-462L8.1_ENSG00000229656                                                           |
| 10 | 33247411 | 33247901 | KD2-H4K8ac_peak_3572 | 10.96455 | RP11-462L8.1_ENSG00000229656                                                           |
| 10 | 33269344 | 33269543 | KD2-H4K8ac_peak_3573 | 8.85813  |                                                                                        |
| 10 | 33270067 | 33270292 | KD2-H4K8ac_peak_3574 | 6.65673  |                                                                                        |
| 10 | 33294722 | 33295029 | KD2-H4K8ac_peak_3575 | 6.27931  | ITGB1_ENSG00000150093                                                                  |
| 10 | 33624300 | 33624502 | KD2-H4K8ac_peak_3576 | 4.54037  | NRP1_ENSG00000099250                                                                   |
| 10 | 35081973 | 35082324 | KD2-H4K8ac_peak_3577 | 7.51054  |                                                                                        |
| 10 | 35086014 | 35086277 | KD2-H4K8ac_peak_3578 | 4.73064  |                                                                                        |
| 10 | 35103483 | 35104175 | KD2-H4K8ac_peak_3579 | 12.69604 | PARD3_ENSG00000148498;PARD3-AS1_ENSG00000226386                                        |
| 10 | 35104631 | 35104881 | KD2-H4K8ac_peak_3580 | 12.82393 | PARD3_ENSG00000148498;PARD3-AS1_ENSG00000226386                                        |
| 10 | 35414840 | 35415502 | KD2-H4K8ac_peak_3581 | 5.75757  | RP11-297A16.2_ENSG00000230534;CREM_ENSG00000095794                                     |
| 10 | 35416288 | 35416672 | KD2-H4K8ac_peak_3582 | 9.59814  | RP11-297A16.2_ENSG00000230534;CREM_ENSG00000095794                                     |
| 10 | 35507126 | 35507343 | KD2-H4K8ac_peak_3583 | 6.16888  |                                                                                        |
| 10 | 35624825 | 35625587 | KD2-H4K8ac_peak_3584 | 15.81711 | RP11-324I22.4_ENSG00000271335                                                          |
| 10 | 36799501 | 36799775 | KD2-H4K8ac_peak_3585 | 6.90458  |                                                                                        |
| 10 | 38146680 | 38146992 | KD2-H4K8ac_peak_3586 | 18.22876 | ZNF248_ENSG00000198105;RP11-162G10.5_ENSG00000236514                                   |

|    |          |          |                      |          |                                                     |
|----|----------|----------|----------------------|----------|-----------------------------------------------------|
| 10 | 38265223 | 38265482 | KD2-H4K8ac_peak_3587 | 10.72313 | ZNF25_ENSG00000175395;RP11-393J16.4_ENSG00000226447 |
| 10 | 38299255 | 38299890 | KD2-H4K8ac_peak_3588 | 12.93209 | ZNF33A_ENSG00000189180                              |
| 10 | 38382387 | 38383078 | KD2-H4K8ac_peak_3589 | 5.14125  | ZNF37A_ENSG00000075407                              |
| 10 | 38383456 | 38383902 | KD2-H4K8ac_peak_3590 | 7.40111  | ZNF37A_ENSG00000075407                              |
| 10 | 38691267 | 38691723 | KD2-H4K8ac_peak_3591 | 13.09607 | SEPT7P9_ENSG00000120555                             |
| 10 | 38692262 | 38692775 | KD2-H4K8ac_peak_3592 | 11.30637 | SEPT7P9_ENSG00000120555                             |
| 10 | 42863083 | 42863396 | KD2-H4K8ac_peak_3593 | 5.82799  | RP11-313J2.1_ENSG00000215146                        |
| 10 | 42970471 | 42970815 | KD2-H4K8ac_peak_3594 | 11.05407 | LINC00839_ENSG00000185904                           |
| 10 | 43133136 | 43133334 | KD2-H4K8ac_peak_3595 | 5.43522  | ZNF33B_ENSG00000272373;ZNF33B_ENSG00000196693       |
| 10 | 43133739 | 43134303 | KD2-H4K8ac_peak_3596 | 22.28045 | ZNF33B_ENSG00000272373;ZNF33B_ENSG00000196693       |
| 10 | 43186904 | 43187119 | KD2-H4K8ac_peak_3597 | 8.30974  | AL022344.4_ENSG00000233515                          |
| 10 | 43187407 | 43187821 | KD2-H4K8ac_peak_3598 | 6.56211  | AL022344.4_ENSG00000233515                          |
| 10 | 43277649 | 43278127 | KD2-H4K8ac_peak_3599 | 7.44247  | BMS1_ENSG00000165733                                |
| 10 | 43361861 | 43362195 | KD2-H4K8ac_peak_3600 | 13.35993 |                                                     |
| 10 | 43362436 | 43362628 | KD2-H4K8ac_peak_3601 | 5.13615  |                                                     |
| 10 | 43366106 | 43366750 | KD2-H4K8ac_peak_3602 | 15.61313 | RP11-124O11.1_ENSG00000234944                       |
| 10 | 43367158 | 43368124 | KD2-H4K8ac_peak_3603 | 12.57865 | RP11-124O11.1_ENSG00000234944                       |
| 10 | 43368419 | 43368878 | KD2-H4K8ac_peak_3604 | 10.08707 |                                                     |
| 10 | 43370331 | 43371306 | KD2-H4K8ac_peak_3605 | 10.96455 |                                                     |
| 10 | 43372025 | 43372241 | KD2-H4K8ac_peak_3606 | 9.58924  |                                                     |
| 10 | 43429013 | 43430153 | KD2-H4K8ac_peak_3607 | 10.96455 |                                                     |
| 10 | 43435037 | 43435660 | KD2-H4K8ac_peak_3608 | 9.63487  |                                                     |
| 10 | 43446905 | 43447709 | KD2-H4K8ac_peak_3609 | 15.53798 |                                                     |
| 10 | 43448310 | 43448558 | KD2-H4K8ac_peak_3610 | 6.66692  |                                                     |
| 10 | 43456906 | 43458593 | KD2-H4K8ac_peak_3611 | 12.08081 |                                                     |
| 10 | 43464461 | 43466017 | KD2-H4K8ac_peak_3612 | 16.72302 |                                                     |
| 10 | 43466344 | 43467466 | KD2-H4K8ac_peak_3613 | 17.53289 |                                                     |
| 10 | 43469363 | 43470115 | KD2-H4K8ac_peak_3614 | 6.99194  |                                                     |
| 10 | 43470333 | 43470688 | KD2-H4K8ac_peak_3615 | 9.89383  |                                                     |
| 10 | 43475431 | 43476261 | KD2-H4K8ac_peak_3616 | 12.30509 | RP11-124O11.2_ENSG00000229630                       |
| 10 | 43476482 | 43476972 | KD2-H4K8ac_peak_3617 | 8.1235   | RP11-124O11.2_ENSG00000229630                       |
| 10 | 43477206 | 43477856 | KD2-H4K8ac_peak_3618 | 10.40701 | RP11-124O11.2_ENSG00000229630                       |
| 10 | 43478398 | 43478686 | KD2-H4K8ac_peak_3619 | 5.18937  |                                                     |
| 10 | 43484919 | 43485324 | KD2-H4K8ac_peak_3620 | 8.55581  |                                                     |
| 10 | 43486229 | 43486885 | KD2-H4K8ac_peak_3621 | 9.20193  |                                                     |
| 10 | 43487787 | 43488386 | KD2-H4K8ac_peak_3622 | 6.36375  |                                                     |
| 10 | 43488653 | 43488862 | KD2-H4K8ac_peak_3623 | 4.67342  |                                                     |
| 10 | 43534077 | 43534272 | KD2-H4K8ac_peak_3624 | 6.90231  |                                                     |
| 10 | 43535177 | 43535851 | KD2-H4K8ac_peak_3625 | 9.73431  |                                                     |
| 10 | 43538792 | 43540182 | KD2-H4K8ac_peak_3626 | 6.40297  |                                                     |
| 10 | 43540750 | 43541065 | KD2-H4K8ac_peak_3627 | 5.47227  |                                                     |
| 10 | 43542272 | 43542523 | KD2-H4K8ac_peak_3628 | 7.25739  |                                                     |
| 10 | 43550140 | 43550416 | KD2-H4K8ac_peak_3629 | 6.40297  |                                                     |
| 10 | 43551106 | 43551568 | KD2-H4K8ac_peak_3630 | 11.92978 |                                                     |
| 10 | 43552080 | 43552446 | KD2-H4K8ac_peak_3631 | 12.93209 |                                                     |
| 10 | 43552941 | 43555098 | KD2-H4K8ac_peak_3632 | 11.92978 |                                                     |

|    |          |          |                      |          |                                                                                 |
|----|----------|----------|----------------------|----------|---------------------------------------------------------------------------------|
| 10 | 43555843 | 43556087 | KD2-H4K8ac_peak_3633 | 5.75757  |                                                                                 |
| 10 | 43564115 | 43564568 | KD2-H4K8ac_peak_3634 | 7.99241  |                                                                                 |
| 10 | 43564766 | 43565401 | KD2-H4K8ac_peak_3635 | 10.19949 |                                                                                 |
| 10 | 43571756 | 43572296 | KD2-H4K8ac_peak_3636 | 10.19949 | RET_ENSG00000165731                                                             |
| 10 | 43572643 | 43572879 | KD2-H4K8ac_peak_3637 | 7.09622  | RET_ENSG00000165731                                                             |
| 10 | 43573111 | 43573393 | KD2-H4K8ac_peak_3638 | 5.405    | RET_ENSG00000165731                                                             |
| 10 | 43573731 | 43574385 | KD2-H4K8ac_peak_3639 | 3.90565  |                                                                                 |
| 10 | 43596824 | 43597055 | KD2-H4K8ac_peak_3640 | 5.14125  |                                                                                 |
| 10 | 43633237 | 43634156 | KD2-H4K8ac_peak_3641 | 17.46525 | RP11-351D16.3_ENSG00000273008;CSGALNACT2_ENSG00000169826                        |
| 10 | 43857362 | 43857595 | KD2-H4K8ac_peak_3642 | 6.2463   |                                                                                 |
| 10 | 43857977 | 43858573 | KD2-H4K8ac_peak_3643 | 22.28045 |                                                                                 |
| 10 | 43891973 | 43892179 | KD2-H4K8ac_peak_3644 | 6.40297  |                                                                                 |
| 10 | 43902857 | 43903065 | KD2-H4K8ac_peak_3645 | 8.23274  |                                                                                 |
| 10 | 43904443 | 43904635 | KD2-H4K8ac_peak_3646 | 7.47462  | HNRNPF_ENSG00000169813                                                          |
| 10 | 43904917 | 43905273 | KD2-H4K8ac_peak_3647 | 7.40314  | HNRNPF_ENSG00000169813                                                          |
| 10 | 43915486 | 43916537 | KD2-H4K8ac_peak_3648 | 14.66631 | RP11-517P14.2_ENSG00000230555                                                   |
| 10 | 43931969 | 43932479 | KD2-H4K8ac_peak_3649 | 10.19949 | ZNF487_ENSG00000243660                                                          |
| 10 | 43950555 | 43950864 | KD2-H4K8ac_peak_3650 | 12.88108 |                                                                                 |
| 10 | 43951388 | 43952122 | KD2-H4K8ac_peak_3651 | 8.28234  |                                                                                 |
| 10 | 44069418 | 44070088 | KD2-H4K8ac_peak_3652 | 9.36516  | ZNF239_ENSG00000196793                                                          |
| 10 | 44070342 | 44070563 | KD2-H4K8ac_peak_3653 | 6.16888  | ZNF239_ENSG00000196793                                                          |
| 10 | 44101502 | 44102684 | KD2-H4K8ac_peak_3654 | 12.74171 | CAP1P2_ENSG00000232004;ZNF485_ENSG00000198298                                   |
| 10 | 44143810 | 44144772 | KD2-H4K8ac_peak_3655 | 21.06321 | ZNF32_ENSG00000169740                                                           |
| 10 | 44185016 | 44185942 | KD2-H4K8ac_peak_3656 | 12.81138 |                                                                                 |
| 10 | 44374074 | 44374268 | KD2-H4K8ac_peak_3657 | 9.35804  |                                                                                 |
| 10 | 44374496 | 44374830 | KD2-H4K8ac_peak_3658 | 7.45501  |                                                                                 |
| 10 | 44506405 | 44506633 | KD2-H4K8ac_peak_3659 | 6.16888  |                                                                                 |
| 10 | 44756023 | 44756280 | KD2-H4K8ac_peak_3660 | 6.97919  | RP11-20J15.2_ENSG00000237590                                                    |
| 10 | 44756490 | 44756689 | KD2-H4K8ac_peak_3661 | 9.6589   | RP11-20J15.2_ENSG00000237590                                                    |
| 10 | 44806145 | 44806404 | KD2-H4K8ac_peak_3662 | 11.75669 |                                                                                 |
| 10 | 45455271 | 45455555 | KD2-H4K8ac_peak_3663 | 8.02571  | TMEM72-AS1_ENSG00000224812;RP11-285G1.14_ENSG00000273363;RASSF4_ENSG00000107551 |
| 10 | 45469883 | 45470771 | KD2-H4K8ac_peak_3664 | 16.66847 |                                                                                 |
| 10 | 45474068 | 45474269 | KD2-H4K8ac_peak_3665 | 8.26945  | C10orf10_ENSG00000165507                                                        |
| 10 | 45495941 | 45496169 | KD2-H4K8ac_peak_3666 | 9.89126  | C10orf25_ENSG00000165511;ZNF22_ENSG00000165512                                  |
| 10 | 45496420 | 45497325 | KD2-H4K8ac_peak_3667 | 15.53798 | C10orf25_ENSG00000165511;ZNF22_ENSG00000165512                                  |
| 10 | 45914595 | 45915337 | KD2-H4K8ac_peak_3668 | 10.0692  |                                                                                 |
| 10 | 46090702 | 46091148 | KD2-H4K8ac_peak_3669 | 6.13909  | MARCH8_ENSG00000165406                                                          |
| 10 | 46167722 | 46168075 | KD2-H4K8ac_peak_3670 | 11.92978 | ZFAND4_ENSG00000172671                                                          |
| 10 | 46168428 | 46168972 | KD2-H4K8ac_peak_3671 | 15.22643 | ZFAND4_ENSG00000172671                                                          |
| 10 | 46222169 | 46222934 | KD2-H4K8ac_peak_3672 | 17.42905 | FAM21FP_ENSG00000237840;RP11-671E7.1_ENSG00000228702;FAM21C_ENSG00000172661     |
| 10 | 46951521 | 46952026 | KD2-H4K8ac_peak_3673 | 6.66359  | RP11-38L15.2_ENSG00000229227;RP11-38L15.3_ENSG00000231187                       |
| 10 | 46962130 | 46962667 | KD2-H4K8ac_peak_3674 | 6.20982  |                                                                                 |
| 10 | 46974970 | 46975800 | KD2-H4K8ac_peak_3675 | 5.16726  |                                                                                 |
| 10 | 46992638 | 46993804 | KD2-H4K8ac_peak_3676 | 32.02706 | GPRIN2_ENSG00000204175                                                          |
| 10 | 47056776 | 47057159 | KD2-H4K8ac_peak_3677 | 15.20126 |                                                                                 |
| 10 | 47057791 | 47058207 | KD2-H4K8ac_peak_3678 | 11.8675  |                                                                                 |

|    |          |          |                      |          |                                                       |
|----|----------|----------|----------------------|----------|-------------------------------------------------------|
| 10 | 47107825 | 47108024 | KD2-H4K8ac_peak_3679 | 5.32397  |                                                       |
| 10 | 47108304 | 47109188 | KD2-H4K8ac_peak_3680 | 11.92978 |                                                       |
| 10 | 47619138 | 47619948 | KD2-H4K8ac_peak_3681 | 9.1707   |                                                       |
| 10 | 47653765 | 47654305 | KD2-H4K8ac_peak_3682 | 6.52179  |                                                       |
| 10 | 47655664 | 47656420 | KD2-H4K8ac_peak_3683 | 8.82366  | RP11-292F22.7_ENSG00000259942                         |
| 10 | 47769170 | 47769406 | KD2-H4K8ac_peak_3684 | 15.9336  |                                                       |
| 10 | 48354450 | 48354671 | KD2-H4K8ac_peak_3685 | 8.2413   | ZNF488_ENSG00000165388                                |
| 10 | 48451807 | 48452554 | KD2-H4K8ac_peak_3686 | 10.63441 |                                                       |
| 10 | 48579497 | 48579736 | KD2-H4K8ac_peak_3687 | 4.9025   |                                                       |
| 10 | 49514777 | 49514969 | KD2-H4K8ac_peak_3688 | 8.4716   | MAPK8_ENSG00000107643                                 |
| 10 | 49515213 | 49515409 | KD2-H4K8ac_peak_3689 | 3.97079  | MAPK8_ENSG00000107643                                 |
| 10 | 49664374 | 49664615 | KD2-H4K8ac_peak_3690 | 7.76104  |                                                       |
| 10 | 49672974 | 49673181 | KD2-H4K8ac_peak_3691 | 7.47462  |                                                       |
| 10 | 49678477 | 49678830 | KD2-H4K8ac_peak_3692 | 5.59859  |                                                       |
| 10 | 49753767 | 49754090 | KD2-H4K8ac_peak_3693 | 5.53095  | RP11-541M12.3_ENSG00000231906                         |
| 10 | 49788120 | 49788651 | KD2-H4K8ac_peak_3694 | 5.30799  |                                                       |
| 10 | 49812803 | 49813234 | KD2-H4K8ac_peak_3695 | 7.26089  |                                                       |
| 10 | 49863995 | 49864253 | KD2-H4K8ac_peak_3696 | 10.21366 | ARHGAP22_ENSG00000128805                              |
| 10 | 49864851 | 49865053 | KD2-H4K8ac_peak_3697 | 5.30799  | ARHGAP22_ENSG00000128805                              |
| 10 | 50011906 | 50012329 | KD2-H4K8ac_peak_3698 | 5.61377  |                                                       |
| 10 | 50012810 | 50014074 | KD2-H4K8ac_peak_3699 | 12.42547 |                                                       |
| 10 | 50209843 | 50210122 | KD2-H4K8ac_peak_3700 | 11.1952  |                                                       |
| 10 | 50289267 | 50289474 | KD2-H4K8ac_peak_3701 | 5.45396  |                                                       |
| 10 | 50323733 | 50323978 | KD2-H4K8ac_peak_3702 | 9.11031  | VSTM4_ENSG00000165633                                 |
| 10 | 50358767 | 50358982 | KD2-H4K8ac_peak_3703 | 4.39858  |                                                       |
| 10 | 50480765 | 50481127 | KD2-H4K8ac_peak_3704 | 5.45396  |                                                       |
| 10 | 50506669 | 50506885 | KD2-H4K8ac_peak_3705 | 4.211    | C10orf71-AS1_ENSG00000236208;C10orf71_ENSG00000177354 |
| 10 | 50507202 | 50508059 | KD2-H4K8ac_peak_3706 | 10.43145 | C10orf71-AS1_ENSG00000236208;C10orf71_ENSG00000177354 |
| 10 | 50508664 | 50509253 | KD2-H4K8ac_peak_3707 | 12.74171 |                                                       |
| 10 | 50568278 | 50569545 | KD2-H4K8ac_peak_3708 | 11.90231 |                                                       |
| 10 | 50569934 | 50570145 | KD2-H4K8ac_peak_3709 | 8.79106  |                                                       |
| 10 | 50602854 | 50604029 | KD2-H4K8ac_peak_3710 | 9.57101  | DRGX_ENSG00000165606                                  |
| 10 | 50604366 | 50604673 | KD2-H4K8ac_peak_3711 | 9.97896  | DRGX_ENSG00000165606                                  |
| 10 | 50605583 | 50605936 | KD2-H4K8ac_peak_3712 | 5.4779   |                                                       |
| 10 | 50813396 | 50813931 | KD2-H4K8ac_peak_3713 | 8.30974  |                                                       |
| 10 | 50818580 | 50818805 | KD2-H4K8ac_peak_3714 | 3.97079  | SLC18A3_ENSG00000187714                               |
| 10 | 50824853 | 50825168 | KD2-H4K8ac_peak_3715 | 6.16747  |                                                       |
| 10 | 50830098 | 50830389 | KD2-H4K8ac_peak_3716 | 10.46264 |                                                       |
| 10 | 50836787 | 50837093 | KD2-H4K8ac_peak_3717 | 5.72327  |                                                       |
| 10 | 50838097 | 50838565 | KD2-H4K8ac_peak_3718 | 7.07512  |                                                       |
| 10 | 50841387 | 50841673 | KD2-H4K8ac_peak_3719 | 9.16531  |                                                       |
| 10 | 50871046 | 50871522 | KD2-H4K8ac_peak_3720 | 4.70206  |                                                       |
| 10 | 50874255 | 50874603 | KD2-H4K8ac_peak_3721 | 7.93362  |                                                       |
| 10 | 50887695 | 50888056 | KD2-H4K8ac_peak_3722 | 26.40805 | C10orf53_ENSG00000178645                              |
| 10 | 50969891 | 50970334 | KD2-H4K8ac_peak_3723 | 24.30324 | OGDHL_ENSG00000197444                                 |
| 10 | 51489255 | 51489763 | KD2-H4K8ac_peak_3724 | 5.66705  |                                                       |

|    |          |          |                      |          |                                                      |
|----|----------|----------|----------------------|----------|------------------------------------------------------|
| 10 | 51497867 | 51498448 | KD2-H4K8ac_peak_3725 | 6.40297  |                                                      |
| 10 | 51498876 | 51499379 | KD2-H4K8ac_peak_3726 | 6.05809  |                                                      |
| 10 | 51499744 | 51500472 | KD2-H4K8ac_peak_3727 | 6.99815  |                                                      |
| 10 | 51561930 | 51562133 | KD2-H4K8ac_peak_3728 | 6.16888  |                                                      |
| 10 | 51623658 | 51623861 | KD2-H4K8ac_peak_3729 | 13.57066 | TIMM23_ENSG00000138297;PARGP1_ENSG00000214982        |
| 10 | 51827242 | 51828204 | KD2-H4K8ac_peak_3730 | 15.9336  | RP11-324H6.5_ENSG00000235618;FAM21A_ENSG00000099290  |
| 10 | 52384015 | 52384254 | KD2-H4K8ac_peak_3731 | 6.65673  | SGMS1_ENSG00000198964;RP11-50E11.3_ENSG00000226200   |
| 10 | 52384462 | 52385313 | KD2-H4K8ac_peak_3732 | 11.05467 | SGMS1_ENSG00000198964;RP11-50E11.3_ENSG00000226200   |
| 10 | 52499168 | 52499761 | KD2-H4K8ac_peak_3733 | 9.95342  | ASAH2B_ENSG00000204147                               |
| 10 | 52751466 | 52752354 | KD2-H4K8ac_peak_3734 | 10.46264 | PRKG1_ENSG00000185532                                |
| 10 | 52752808 | 52753001 | KD2-H4K8ac_peak_3735 | 7.27716  |                                                      |
| 10 | 54068435 | 54068732 | KD2-H4K8ac_peak_3736 | 11.05467 |                                                      |
| 10 | 54069678 | 54069902 | KD2-H4K8ac_peak_3737 | 5.54647  |                                                      |
| 10 | 54072881 | 54073336 | KD2-H4K8ac_peak_3738 | 10.08707 | PRKG1-AS1_ENSG00000236671;DKK1_ENSG00000107984       |
| 10 | 54299483 | 54299965 | KD2-H4K8ac_peak_3739 | 6.40683  |                                                      |
| 10 | 54301638 | 54302103 | KD2-H4K8ac_peak_3740 | 11.92978 |                                                      |
| 10 | 54356786 | 54357169 | KD2-H4K8ac_peak_3741 | 5.01002  |                                                      |
| 10 | 54360958 | 54361158 | KD2-H4K8ac_peak_3742 | 13.57066 |                                                      |
| 10 | 54379025 | 54379753 | KD2-H4K8ac_peak_3743 | 10.05606 |                                                      |
| 10 | 54380161 | 54380462 | KD2-H4K8ac_peak_3744 | 4.67342  |                                                      |
| 10 | 54405313 | 54405879 | KD2-H4K8ac_peak_3745 | 7.27716  |                                                      |
| 10 | 55458697 | 55458952 | KD2-H4K8ac_peak_3746 | 6.16888  |                                                      |
| 10 | 57278494 | 57278727 | KD2-H4K8ac_peak_3747 | 10.0692  |                                                      |
| 10 | 57390593 | 57391031 | KD2-H4K8ac_peak_3748 | 10.02417 |                                                      |
| 10 | 59242804 | 59243090 | KD2-H4K8ac_peak_3749 | 7.59643  |                                                      |
| 10 | 60026910 | 60027611 | KD2-H4K8ac_peak_3750 | 10.05606 | IPMK_ENSG00000151151                                 |
| 10 | 60027974 | 60028219 | KD2-H4K8ac_peak_3751 | 5.58333  | IPMK_ENSG00000151151;CISD1_ENSG00000122873           |
| 10 | 60029029 | 60029248 | KD2-H4K8ac_peak_3752 | 11.92978 | CISD1_ENSG00000122873                                |
| 10 | 60094546 | 60095436 | KD2-H4K8ac_peak_3753 | 11.03331 | UBE2D1_ENSG00000072401                               |
| 10 | 60145272 | 60145660 | KD2-H4K8ac_peak_3754 | 7.40314  | TFAM_ENSG00000108064                                 |
| 10 | 60272923 | 60273239 | KD2-H4K8ac_peak_3755 | 4.67342  | BICC1_ENSG00000122870                                |
| 10 | 60412976 | 60413388 | KD2-H4K8ac_peak_3756 | 8.97719  |                                                      |
| 10 | 60936510 | 60936924 | KD2-H4K8ac_peak_3757 | 13.81781 | PHYHIPL_ENSG00000165443                              |
| 10 | 61043207 | 61043430 | KD2-H4K8ac_peak_3758 | 8.4939   |                                                      |
| 10 | 61468683 | 61470011 | KD2-H4K8ac_peak_3759 | 12.57865 |                                                      |
| 10 | 61665717 | 61666810 | KD2-H4K8ac_peak_3760 | 7.76104  | CCDC6_ENSG00000108091                                |
| 10 | 62492697 | 62493548 | KD2-H4K8ac_peak_3761 | 23.43329 | ANK3_ENSG00000151150;RP11-131N11.4_ENSG00000254271   |
| 10 | 62537150 | 62537548 | KD2-H4K8ac_peak_3762 | 5.25071  | CDK1_ENSG00000170312                                 |
| 10 | 62538261 | 62538559 | KD2-H4K8ac_peak_3763 | 14.69247 | CDK1_ENSG00000170312                                 |
| 10 | 62702664 | 62702940 | KD2-H4K8ac_peak_3764 | 5.18447  |                                                      |
| 10 | 62703381 | 62704872 | KD2-H4K8ac_peak_3765 | 9.26408  |                                                      |
| 10 | 62760699 | 62761150 | KD2-H4K8ac_peak_3766 | 5.54647  | RHOBTB1_ENSG00000072422                              |
| 10 | 62761348 | 62761647 | KD2-H4K8ac_peak_3767 | 15.61313 | RHOBTB1_ENSG00000072422                              |
| 10 | 63213021 | 63213260 | KD2-H4K8ac_peak_3768 | 4.42765  | TMEM26_ENSG00000196932;RP11-809M12.1_ENSG00000237233 |
| 10 | 63661046 | 63661240 | KD2-H4K8ac_peak_3769 | 7.96194  | ARID5B_ENSG00000150347                               |
| 10 | 63663071 | 63663407 | KD2-H4K8ac_peak_3770 | 12.42547 |                                                      |

|    |          |          |                      |          |                                                   |
|----|----------|----------|----------------------|----------|---------------------------------------------------|
| 10 | 63798797 | 63799021 | KD2-H4K8ac_peak_3771 | 5.04237  |                                                   |
| 10 | 64028007 | 64028339 | KD2-H4K8ac_peak_3772 | 5.54647  | RTKN2_ENSG00000182010                             |
| 10 | 64133554 | 64134434 | KD2-H4K8ac_peak_3773 | 14.66631 | ZNF365_ENSG00000138311                            |
| 10 | 64564565 | 64565147 | KD2-H4K8ac_peak_3774 | 15.82362 | RP11-436D10.3_ENSG00000238280;ADO_ENSG00000181915 |
| 10 | 65030227 | 65030438 | KD2-H4K8ac_peak_3775 | 5.88845  |                                                   |
| 10 | 65224996 | 65226023 | KD2-H4K8ac_peak_3776 | 17.17257 | JMJD1C_ENSG00000171988;JMJD1C-AS1_ENSG00000272767 |
| 10 | 65281239 | 65282111 | KD2-H4K8ac_peak_3777 | 10.43145 | REEP3_ENSG00000165476                             |
| 10 | 65386444 | 65386658 | KD2-H4K8ac_peak_3778 | 4.92515  |                                                   |
| 10 | 65387027 | 65387368 | KD2-H4K8ac_peak_3779 | 7.59643  |                                                   |
| 10 | 65388803 | 65389050 | KD2-H4K8ac_peak_3780 | 8.79557  |                                                   |
| 10 | 65389564 | 65389822 | KD2-H4K8ac_peak_3781 | 5.13615  |                                                   |
| 10 | 65390515 | 65390853 | KD2-H4K8ac_peak_3782 | 14.69247 |                                                   |
| 10 | 65391107 | 65391607 | KD2-H4K8ac_peak_3783 | 7.40633  |                                                   |
| 10 | 65432418 | 65432750 | KD2-H4K8ac_peak_3784 | 5.57044  |                                                   |
| 10 | 65460027 | 65460315 | KD2-H4K8ac_peak_3785 | 5.93446  |                                                   |
| 10 | 65471246 | 65471595 | KD2-H4K8ac_peak_3786 | 7.36799  |                                                   |
| 10 | 65472366 | 65473118 | KD2-H4K8ac_peak_3787 | 13.07235 |                                                   |
| 10 | 65473543 | 65473894 | KD2-H4K8ac_peak_3788 | 9.76452  |                                                   |
| 10 | 65477790 | 65478321 | KD2-H4K8ac_peak_3789 | 7.22457  |                                                   |
| 10 | 65480447 | 65480853 | KD2-H4K8ac_peak_3790 | 6.15357  |                                                   |
| 10 | 65481805 | 65482233 | KD2-H4K8ac_peak_3791 | 5.57044  |                                                   |
| 10 | 65555908 | 65556175 | KD2-H4K8ac_peak_3792 | 7.22457  |                                                   |
| 10 | 65609208 | 65609458 | KD2-H4K8ac_peak_3793 | 6.72021  |                                                   |
| 10 | 66287650 | 66288227 | KD2-H4K8ac_peak_3794 | 11.70505 |                                                   |
| 10 | 67330016 | 67330565 | KD2-H4K8ac_peak_3795 | 7.12754  | RP11-222A11.1_ENSG00000228065                     |
| 10 | 69523909 | 69524167 | KD2-H4K8ac_peak_3796 | 13.86286 |                                                   |
| 10 | 69609461 | 69610107 | KD2-H4K8ac_peak_3797 | 13.81781 | RP11-57G10.8_ENSG00000272892                      |
| 10 | 69643720 | 69644140 | KD2-H4K8ac_peak_3798 | 4.8888   | SIRT1_ENSG00000096717                             |
| 10 | 69644608 | 69645041 | KD2-H4K8ac_peak_3799 | 11.86082 | SIRT1_ENSG00000096717                             |
| 10 | 69834653 | 69834933 | KD2-H4K8ac_peak_3800 | 8.30974  | HERC4_ENSG00000148634                             |
| 10 | 69991444 | 69991816 | KD2-H4K8ac_peak_3801 | 5.9696   | ATOH7_ENSG00000179774                             |
| 10 | 70088695 | 70088955 | KD2-H4K8ac_peak_3802 | 5.29555  |                                                   |
| 10 | 70091054 | 70091644 | KD2-H4K8ac_peak_3803 | 6.20982  | HNRNPH3_ENSG00000096746                           |
| 10 | 70091868 | 70092709 | KD2-H4K8ac_peak_3804 | 18.80827 | PBLD_ENSG00000108187;HNRNPH3_ENSG00000096746      |
| 10 | 70166280 | 70167385 | KD2-H4K8ac_peak_3805 | 19.43192 | RUFY2_ENSG00000204130                             |
| 10 | 70230970 | 70232252 | KD2-H4K8ac_peak_3806 | 14.23242 | DNA2_ENSG00000138346                              |
| 10 | 70286866 | 70287244 | KD2-H4K8ac_peak_3807 | 7.07117  | SLC25A16_ENSG00000122912                          |
| 10 | 70287488 | 70287970 | KD2-H4K8ac_peak_3808 | 12.81138 | SLC25A16_ENSG00000122912                          |
| 10 | 70320661 | 70320906 | KD2-H4K8ac_peak_3809 | 9.91109  | TET1_ENSG00000138336                              |
| 10 | 70358511 | 70358768 | KD2-H4K8ac_peak_3810 | 10.0692  |                                                   |
| 10 | 70480116 | 70480383 | KD2-H4K8ac_peak_3811 | 18.08496 | CCAR1_ENSG00000060339                             |
| 10 | 70481009 | 70481515 | KD2-H4K8ac_peak_3812 | 16.33377 | CCAR1_ENSG00000060339                             |
| 10 | 70586462 | 70587475 | KD2-H4K8ac_peak_3813 | 5.82799  | STOX1_ENSG00000165730                             |
| 10 | 70660136 | 70660829 | KD2-H4K8ac_peak_3814 | 13.01932 | DDX50_ENSG00000107625                             |
| 10 | 70661180 | 70661412 | KD2-H4K8ac_peak_3815 | 4.84794  | DDX50_ENSG00000107625                             |
| 10 | 70715169 | 70716654 | KD2-H4K8ac_peak_3816 | 11.92978 | DDX21_ENSG00000165732                             |

|    |          |          |                      |          |                          |
|----|----------|----------|----------------------|----------|--------------------------|
| 10 | 70748564 | 70749052 | KD2-H4K8ac_peak_3817 | 16.63953 | KIAA1279_ENSG00000198954 |
| 10 | 70883327 | 70883639 | KD2-H4K8ac_peak_3818 | 6.25869  | VPS26A_ENSG00000122958   |
| 10 | 70884095 | 70884371 | KD2-H4K8ac_peak_3819 | 7.47462  | VPS26A_ENSG00000122958   |
| 10 | 70940040 | 70940340 | KD2-H4K8ac_peak_3820 | 15.58442 | SUPV3L1_ENSG00000156502  |
| 10 | 71077847 | 71078391 | KD2-H4K8ac_peak_3821 | 24.91145 |                          |
| 10 | 71094784 | 71094984 | KD2-H4K8ac_peak_3822 | 4.20044  |                          |
| 10 | 71168750 | 71169107 | KD2-H4K8ac_peak_3823 | 23.27293 |                          |
| 10 | 71211275 | 71211929 | KD2-H4K8ac_peak_3824 | 7.98621  | TSPAN15_ENSG00000099282  |
| 10 | 71266942 | 71267156 | KD2-H4K8ac_peak_3825 | 6.47635  |                          |
| 10 | 71390066 | 71390601 | KD2-H4K8ac_peak_3826 | 8.16906  | C10orf35_ENSG00000171224 |
| 10 | 71445995 | 71446349 | KD2-H4K8ac_peak_3827 | 6.25869  |                          |
| 10 | 71516716 | 71517949 | KD2-H4K8ac_peak_3828 | 8.4716   |                          |
| 10 | 71518986 | 71519428 | KD2-H4K8ac_peak_3829 | 6.30626  |                          |
| 10 | 71626827 | 71627362 | KD2-H4K8ac_peak_3830 | 10.19949 |                          |
| 10 | 71721004 | 71721204 | KD2-H4K8ac_peak_3831 | 3.75035  |                          |
| 10 | 71734955 | 71735362 | KD2-H4K8ac_peak_3832 | 5.16439  |                          |
| 10 | 71812117 | 71813878 | KD2-H4K8ac_peak_3833 | 12.82393 | H2AFY2_ENSG00000099284   |
| 10 | 71891796 | 71892767 | KD2-H4K8ac_peak_3834 | 18.33557 | AIFM2_ENSG00000042286    |
| 10 | 71905110 | 71905397 | KD2-H4K8ac_peak_3835 | 5.53033  |                          |
| 10 | 71905604 | 71905898 | KD2-H4K8ac_peak_3836 | 6.20982  | TYSND1_ENSG00000156521   |
| 10 | 71930794 | 71931079 | KD2-H4K8ac_peak_3837 | 14.42504 | SAR1A_ENSG00000079332    |
| 10 | 71992751 | 71993051 | KD2-H4K8ac_peak_3838 | 6.25869  | PPA1_ENSG00000180817     |
| 10 | 71993336 | 71993541 | KD2-H4K8ac_peak_3839 | 9.89126  | PPA1_ENSG00000180817     |
| 10 | 72123322 | 72123573 | KD2-H4K8ac_peak_3840 | 9.34989  |                          |
| 10 | 72141713 | 72142319 | KD2-H4K8ac_peak_3841 | 11.3394  | LRRC20_ENSG00000172731   |
| 10 | 72142723 | 72142917 | KD2-H4K8ac_peak_3842 | 5.92591  | LRRC20_ENSG00000172731   |
| 10 | 72163958 | 72164200 | KD2-H4K8ac_peak_3843 | 10.77651 | EIF4EBP2_ENSG00000148730 |
| 10 | 72218016 | 72218783 | KD2-H4K8ac_peak_3844 | 7.76104  |                          |
| 10 | 72237861 | 72238611 | KD2-H4K8ac_peak_3845 | 8.55271  | PALD1_ENSG00000107719    |
| 10 | 72259237 | 72259484 | KD2-H4K8ac_peak_3846 | 4.54838  |                          |
| 10 | 72439117 | 72439316 | KD2-H4K8ac_peak_3847 | 7.1181   |                          |
| 10 | 72444503 | 72444980 | KD2-H4K8ac_peak_3848 | 9.11031  |                          |
| 10 | 72445695 | 72445946 | KD2-H4K8ac_peak_3849 | 5.7068   |                          |
| 10 | 72452877 | 72453087 | KD2-H4K8ac_peak_3850 | 4.86324  |                          |
| 10 | 72455205 | 72455783 | KD2-H4K8ac_peak_3851 | 5.54647  |                          |
| 10 | 72458192 | 72458386 | KD2-H4K8ac_peak_3852 | 6.66692  |                          |
| 10 | 72520200 | 72520544 | KD2-H4K8ac_peak_3853 | 6.64337  |                          |
| 10 | 72575716 | 72576272 | KD2-H4K8ac_peak_3854 | 22.36554 | SGPL1_ENSG00000166224    |
| 10 | 72621574 | 72621774 | KD2-H4K8ac_peak_3855 | 4.24345  |                          |
| 10 | 72647567 | 72648575 | KD2-H4K8ac_peak_3856 | 6.84261  | PCBD1_ENSG00000166228    |
| 10 | 72685069 | 72685388 | KD2-H4K8ac_peak_3857 | 5.51783  |                          |
| 10 | 72795207 | 72795558 | KD2-H4K8ac_peak_3858 | 4.30033  |                          |
| 10 | 72796589 | 72796797 | KD2-H4K8ac_peak_3859 | 6.33462  |                          |
| 10 | 72800886 | 72801511 | KD2-H4K8ac_peak_3860 | 9.3973   |                          |
| 10 | 72802469 | 72802691 | KD2-H4K8ac_peak_3861 | 7.96322  |                          |
| 10 | 72805665 | 72806161 | KD2-H4K8ac_peak_3862 | 6.0073   |                          |



|    |          |          |                      |          |                           |
|----|----------|----------|----------------------|----------|---------------------------|
| 10 | 72834517 | 72834865 | KD2-H4K8ac_peak_3863 | 4.68806  |                           |
| 10 | 72845546 | 72845741 | KD2-H4K8ac_peak_3864 | 4.86824  |                           |
| 10 | 72971827 | 72972029 | KD2-H4K8ac_peak_3865 | 4.82973  | UNC5B_ENSG00000107731     |
| 10 | 72972502 | 72973016 | KD2-H4K8ac_peak_3866 | 6.99815  | UNC5B_ENSG00000107731     |
| 10 | 72982609 | 72983159 | KD2-H4K8ac_peak_3867 | 9.66321  |                           |
| 10 | 72989047 | 72989444 | KD2-H4K8ac_peak_3868 | 4.86324  |                           |
| 10 | 72991492 | 72991704 | KD2-H4K8ac_peak_3869 | 4.86324  |                           |
| 10 | 72992198 | 72992493 | KD2-H4K8ac_peak_3870 | 7.76329  |                           |
| 10 | 72992742 | 72994677 | KD2-H4K8ac_peak_3871 | 9.63487  |                           |
| 10 | 72995041 | 72995816 | KD2-H4K8ac_peak_3872 | 29.69376 |                           |
| 10 | 72996031 | 72997846 | KD2-H4K8ac_peak_3873 | 9.89383  |                           |
| 10 | 72998302 | 72998564 | KD2-H4K8ac_peak_3874 | 4.50891  |                           |
| 10 | 72999347 | 72999779 | KD2-H4K8ac_peak_3875 | 15.17328 |                           |
| 10 | 73000039 | 73001142 | KD2-H4K8ac_peak_3876 | 16.57619 |                           |
| 10 | 73001561 | 73002784 | KD2-H4K8ac_peak_3877 | 18.11807 |                           |
| 10 | 73003737 | 73004144 | KD2-H4K8ac_peak_3878 | 10.7186  |                           |
| 10 | 73004366 | 73004579 | KD2-H4K8ac_peak_3879 | 11.83301 |                           |
| 10 | 73005086 | 73006252 | KD2-H4K8ac_peak_3880 | 14.52423 |                           |
| 10 | 73009384 | 73010071 | KD2-H4K8ac_peak_3881 | 20.5798  |                           |
| 10 | 73012045 | 73013721 | KD2-H4K8ac_peak_3882 | 8.88082  |                           |
| 10 | 73014050 | 73014667 | KD2-H4K8ac_peak_3883 | 11.92978 |                           |
| 10 | 73015650 | 73017742 | KD2-H4K8ac_peak_3884 | 22.20916 |                           |
| 10 | 73018308 | 73019046 | KD2-H4K8ac_peak_3885 | 8.55271  |                           |
| 10 | 73019765 | 73020730 | KD2-H4K8ac_peak_3886 | 7.20567  |                           |
| 10 | 73024956 | 73028280 | KD2-H4K8ac_peak_3887 | 12.82393 |                           |
| 10 | 73029621 | 73029837 | KD2-H4K8ac_peak_3888 | 5.54647  |                           |
| 10 | 73030622 | 73030879 | KD2-H4K8ac_peak_3889 | 7.20567  |                           |
| 10 | 73031194 | 73031700 | KD2-H4K8ac_peak_3890 | 6.40297  |                           |
| 10 | 73034803 | 73035193 | KD2-H4K8ac_peak_3891 | 4.96644  |                           |
| 10 | 73036177 | 73036546 | KD2-H4K8ac_peak_3892 | 6.99815  |                           |
| 10 | 73036941 | 73039031 | KD2-H4K8ac_peak_3893 | 11.89502 |                           |
| 10 | 73039406 | 73040001 | KD2-H4K8ac_peak_3894 | 9.65086  |                           |
| 10 | 73078297 | 73078664 | KD2-H4K8ac_peak_3895 | 5.30799  | SLC29A3_ENSG00000198246   |
| 10 | 73082647 | 73082903 | KD2-H4K8ac_peak_3896 | 5.14125  |                           |
| 10 | 73136658 | 73137122 | KD2-H4K8ac_peak_3897 | 10.77651 |                           |
| 10 | 73156200 | 73156426 | KD2-H4K8ac_peak_3898 | 8.30974  | CDH23_ENSG00000107736     |
| 10 | 73398549 | 73398754 | KD2-H4K8ac_peak_3899 | 4.8402   |                           |
| 10 | 73418235 | 73418434 | KD2-H4K8ac_peak_3900 | 6.19483  |                           |
| 10 | 73473426 | 73473627 | KD2-H4K8ac_peak_3901 | 4.76709  |                           |
| 10 | 73484736 | 73485494 | KD2-H4K8ac_peak_3902 | 8.10216  |                           |
| 10 | 73485933 | 73487560 | KD2-H4K8ac_peak_3903 | 8.85813  |                           |
| 10 | 73488496 | 73489028 | KD2-H4K8ac_peak_3904 | 5.59859  |                           |
| 10 | 73497283 | 73497559 | KD2-H4K8ac_peak_3905 | 5.53095  | C10orf105_ENSG00000214688 |
| 10 | 73508636 | 73509257 | KD2-H4K8ac_peak_3906 | 9.11031  |                           |
| 10 | 73524886 | 73525110 | KD2-H4K8ac_peak_3907 | 7.11925  |                           |
| 10 | 73610525 | 73611007 | KD2-H4K8ac_peak_3908 | 12.84642 | PSAP_ENSG00000197746      |

|    |          |          |                      |          |                                                      |
|----|----------|----------|----------------------|----------|------------------------------------------------------|
| 10 | 73611252 | 73611784 | KD2-H4K8ac_peak_3909 | 10.46264 | PSAP_ENSG00000197746                                 |
| 10 | 73619972 | 73620580 | KD2-H4K8ac_peak_3910 | 7.146    |                                                      |
| 10 | 73625517 | 73625795 | KD2-H4K8ac_peak_3911 | 3.91903  |                                                      |
| 10 | 73640772 | 73641412 | KD2-H4K8ac_peak_3912 | 12.81138 |                                                      |
| 10 | 73648384 | 73648839 | KD2-H4K8ac_peak_3913 | 13.72842 |                                                      |
| 10 | 73723600 | 73724934 | KD2-H4K8ac_peak_3914 | 18.7894  | CHST3_ENSG00000122863                                |
| 10 | 73725196 | 73725604 | KD2-H4K8ac_peak_3915 | 3.75035  |                                                      |
| 10 | 73758794 | 73759220 | KD2-H4K8ac_peak_3916 | 9.59905  |                                                      |
| 10 | 73769014 | 73770044 | KD2-H4K8ac_peak_3917 | 15.20126 |                                                      |
| 10 | 73804087 | 73804753 | KD2-H4K8ac_peak_3918 | 7.76104  |                                                      |
| 10 | 73847280 | 73848059 | KD2-H4K8ac_peak_3919 | 7.36799  | SPOCK2_ENSG00000107742                               |
| 10 | 73992464 | 73992941 | KD2-H4K8ac_peak_3920 | 7.11925  |                                                      |
| 10 | 73993865 | 73994128 | KD2-H4K8ac_peak_3921 | 3.74127  |                                                      |
| 10 | 74014306 | 74015310 | KD2-H4K8ac_peak_3922 | 15.61313 |                                                      |
| 10 | 74020138 | 74021342 | KD2-H4K8ac_peak_3923 | 23.33626 |                                                      |
| 10 | 74032193 | 74033348 | KD2-H4K8ac_peak_3924 | 10.7186  | DDIT4_ENSG00000168209                                |
| 10 | 74057409 | 74057797 | KD2-H4K8ac_peak_3925 | 13.95627 |                                                      |
| 10 | 74068069 | 74068695 | KD2-H4K8ac_peak_3926 | 8.4716   |                                                      |
| 10 | 74070204 | 74070719 | KD2-H4K8ac_peak_3927 | 12.2118  |                                                      |
| 10 | 74074765 | 74075290 | KD2-H4K8ac_peak_3928 | 14.8083  |                                                      |
| 10 | 74076019 | 74076651 | KD2-H4K8ac_peak_3929 | 6.82618  |                                                      |
| 10 | 74079182 | 74080540 | KD2-H4K8ac_peak_3930 | 15.61313 |                                                      |
| 10 | 74080838 | 74081535 | KD2-H4K8ac_peak_3931 | 15.57998 |                                                      |
| 10 | 74081787 | 74082307 | KD2-H4K8ac_peak_3932 | 16.54162 |                                                      |
| 10 | 74082983 | 74083313 | KD2-H4K8ac_peak_3933 | 6.55628  |                                                      |
| 10 | 74084663 | 74085483 | KD2-H4K8ac_peak_3934 | 12.76142 |                                                      |
| 10 | 74087758 | 74088734 | KD2-H4K8ac_peak_3935 | 9.048    |                                                      |
| 10 | 74090921 | 74091698 | KD2-H4K8ac_peak_3936 | 15.49029 |                                                      |
| 10 | 74092273 | 74092472 | KD2-H4K8ac_peak_3937 | 10.52915 |                                                      |
| 10 | 74093009 | 74093698 | KD2-H4K8ac_peak_3938 | 10.87173 |                                                      |
| 10 | 74094418 | 74095978 | KD2-H4K8ac_peak_3939 | 14.39182 |                                                      |
| 10 | 74113739 | 74114041 | KD2-H4K8ac_peak_3940 | 8.5092   | DNAJB12_ENSG00000148719                              |
| 10 | 74114266 | 74114674 | KD2-H4K8ac_peak_3941 | 5.54647  | DNAJB12_ENSG00000148719                              |
| 10 | 74114962 | 74115206 | KD2-H4K8ac_peak_3942 | 4.62507  | DNAJB12_ENSG00000148719                              |
| 10 | 74115413 | 74115608 | KD2-H4K8ac_peak_3943 | 6.47635  | DNAJB12_ENSG00000148719                              |
| 10 | 74370805 | 74371215 | KD2-H4K8ac_peak_3944 | 4.211    |                                                      |
| 10 | 74385449 | 74385686 | KD2-H4K8ac_peak_3945 | 6.56211  | MICU1_ENSG00000107745                                |
| 10 | 74386177 | 74386697 | KD2-H4K8ac_peak_3946 | 8.78496  | MICU1_ENSG00000107745                                |
| 10 | 74452364 | 74452667 | KD2-H4K8ac_peak_3947 | 5.57044  | MCU_ENSG00000156026                                  |
| 10 | 74713421 | 74713639 | KD2-H4K8ac_peak_3948 | 4.211    | PLA2G12B_ENSG00000138308                             |
| 10 | 74852583 | 74852782 | KD2-H4K8ac_peak_3949 | 6.24747  |                                                      |
| 10 | 74927522 | 74927724 | KD2-H4K8ac_peak_3950 | 4.8888   | FAM149B1_ENSG00000138286                             |
| 10 | 75012137 | 75012344 | KD2-H4K8ac_peak_3951 | 11.28765 | MRPS16_ENSG00000182180;RP11-152N13.5_ENSG00000227540 |
| 10 | 75118152 | 75118366 | KD2-H4K8ac_peak_3952 | 7.36799  | TTC18_ENSG00000156042                                |
| 10 | 75255309 | 75255558 | KD2-H4K8ac_peak_3953 | 5.88845  | PPP3CB_ENSG00000107758;RP11-137L10.6_ENSG00000221817 |
| 10 | 75385880 | 75386375 | KD2-H4K8ac_peak_3954 | 13.09607 | USP54_ENSG00000166348;RP11-464F9.20_ENSG00000268584  |

|    |          |          |                      |          |                                                                                                            |
|----|----------|----------|----------------------|----------|------------------------------------------------------------------------------------------------------------|
| 10 | 75406483 | 75407176 | KD2-H4K8ac_peak_3955 | 6.25869  |                                                                                                            |
| 10 | 75407528 | 75408099 | KD2-H4K8ac_peak_3956 | 14.66631 |                                                                                                            |
| 10 | 75425234 | 75425442 | KD2-H4K8ac_peak_3957 | 7.27716  |                                                                                                            |
| 10 | 75489986 | 75490596 | KD2-H4K8ac_peak_3958 | 14.8083  | RP11-464F9.1_ENSG00000242288;RP11-574K11.28_ENSG00000271816;BMS1P4_ENSG00000242338;DUSP8P5_ENSG00000235316 |
| 10 | 75504221 | 75504504 | KD2-H4K8ac_peak_3959 | 4.67342  | SEC24C_ENSG00000176986                                                                                     |
| 10 | 75531424 | 75532525 | KD2-H4K8ac_peak_3960 | 13.83097 | AC022400.2_ENSG00000267964;FUT11_ENSG00000196968                                                           |
| 10 | 75541864 | 75542219 | KD2-H4K8ac_peak_3961 | 14.66631 | CHCHD1_ENSG00000172586                                                                                     |
| 10 | 75545409 | 75545795 | KD2-H4K8ac_peak_3962 | 6.13909  | ZSWIM8_ENSG00000214655                                                                                     |
| 10 | 75571293 | 75571486 | KD2-H4K8ac_peak_3963 | 7.07117  | RP11-574K11.31_ENSG00000272916;NDST2_ENSG00000166507                                                       |
| 10 | 75634527 | 75635067 | KD2-H4K8ac_peak_3964 | 12.82393 | CAMK2G_ENSG00000148660                                                                                     |
| 10 | 75758496 | 75758689 | KD2-H4K8ac_peak_3965 | 4.98072  | VCL_ENSG00000035403                                                                                        |
| 10 | 75910234 | 75910481 | KD2-H4K8ac_peak_3966 | 5.57044  | AP3M1_ENSG00000185009;ADK_ENSG00000156110                                                                  |
| 10 | 75935368 | 75935585 | KD2-H4K8ac_peak_3967 | 4.24756  |                                                                                                            |
| 10 | 76345699 | 76345892 | KD2-H4K8ac_peak_3968 | 7.47462  |                                                                                                            |
| 10 | 76346367 | 76346596 | KD2-H4K8ac_peak_3969 | 8.37043  |                                                                                                            |
| 10 | 76584071 | 76585574 | KD2-H4K8ac_peak_3970 | 19.55721 | KAT6B_ENSG00000156650                                                                                      |
| 10 | 76613471 | 76613840 | KD2-H4K8ac_peak_3971 | 6.40683  |                                                                                                            |
| 10 | 76620628 | 76620830 | KD2-H4K8ac_peak_3972 | 4.65111  |                                                                                                            |
| 10 | 76728577 | 76728769 | KD2-H4K8ac_peak_3973 | 6.40683  |                                                                                                            |
| 10 | 76821585 | 76822086 | KD2-H4K8ac_peak_3974 | 5.88845  |                                                                                                            |
| 10 | 76830228 | 76830888 | KD2-H4K8ac_peak_3975 | 8.02571  |                                                                                                            |
| 10 | 76831124 | 76831422 | KD2-H4K8ac_peak_3976 | 9.36516  |                                                                                                            |
| 10 | 76859097 | 76859424 | KD2-H4K8ac_peak_3977 | 6.37852  | SAMD8_ENSG00000156671                                                                                      |
| 10 | 76859968 | 76860366 | KD2-H4K8ac_peak_3978 | 4.37809  | SAMD8_ENSG00000156671                                                                                      |
| 10 | 76870614 | 76870853 | KD2-H4K8ac_peak_3979 | 7.98621  |                                                                                                            |
| 10 | 76969910 | 76971002 | KD2-H4K8ac_peak_3980 | 11.3923  | VDAC2_ENSG00000165637                                                                                      |
| 10 | 76994325 | 76994740 | KD2-H4K8ac_peak_3981 | 5.54647  |                                                                                                            |
| 10 | 76995005 | 76995500 | KD2-H4K8ac_peak_3982 | 13.70605 | COMTD1_ENSG00000165644                                                                                     |
| 10 | 76997989 | 76998669 | KD2-H4K8ac_peak_3983 | 6.56211  |                                                                                                            |
| 10 | 77022542 | 77022771 | KD2-H4K8ac_peak_3984 | 5.57044  |                                                                                                            |
| 10 | 77053571 | 77054281 | KD2-H4K8ac_peak_3985 | 12.06346 |                                                                                                            |
| 10 | 77054872 | 77055177 | KD2-H4K8ac_peak_3986 | 13.73635 |                                                                                                            |
| 10 | 77162587 | 77162943 | KD2-H4K8ac_peak_3987 | 8.16906  | ZNF503_ENSG00000165655                                                                                     |
| 10 | 77164154 | 77164706 | KD2-H4K8ac_peak_3988 | 14.68449 |                                                                                                            |
| 10 | 77165049 | 77165433 | KD2-H4K8ac_peak_3989 | 6.05809  |                                                                                                            |
| 10 | 77169047 | 77169288 | KD2-H4K8ac_peak_3990 | 13.95627 | RP11-399K21.13_ENSG00000273248;RP11-399K21.14_ENSG00000272692                                              |
| 10 | 77169551 | 77169836 | KD2-H4K8ac_peak_3991 | 6.04107  | RP11-399K21.13_ENSG00000273248;RP11-399K21.14_ENSG00000272692                                              |
| 10 | 77191407 | 77191655 | KD2-H4K8ac_peak_3992 | 12.42547 | RP11-399K21.10_ENSG00000236842                                                                             |
| 10 | 77266629 | 77268063 | KD2-H4K8ac_peak_3993 | 10.25088 |                                                                                                            |
| 10 | 77771213 | 77771540 | KD2-H4K8ac_peak_3994 | 5.25071  |                                                                                                            |
| 10 | 77871882 | 77872371 | KD2-H4K8ac_peak_3995 | 11.05467 |                                                                                                            |
| 10 | 77978105 | 77978797 | KD2-H4K8ac_peak_3996 | 9.15329  |                                                                                                            |
| 10 | 78190934 | 78191156 | KD2-H4K8ac_peak_3997 | 9.97423  |                                                                                                            |
| 10 | 78312034 | 78312308 | KD2-H4K8ac_peak_3998 | 11.86082 |                                                                                                            |
| 10 | 78313649 | 78314125 | KD2-H4K8ac_peak_3999 | 9.89126  |                                                                                                            |
| 10 | 78696408 | 78696718 | KD2-H4K8ac_peak_4000 | 16.32216 |                                                                                                            |

|    |          |          |                      |          |                                               |
|----|----------|----------|----------------------|----------|-----------------------------------------------|
| 10 | 78697808 | 78698339 | KD2-H4K8ac_peak_4001 | 4.42498  |                                               |
| 10 | 78801229 | 78801579 | KD2-H4K8ac_peak_4002 | 9.11031  |                                               |
| 10 | 78849930 | 78850349 | KD2-H4K8ac_peak_4003 | 6.40683  |                                               |
| 10 | 78851240 | 78851520 | KD2-H4K8ac_peak_4004 | 7.27716  |                                               |
| 10 | 78864578 | 78865134 | KD2-H4K8ac_peak_4005 | 10.0692  |                                               |
| 10 | 78866091 | 78866283 | KD2-H4K8ac_peak_4006 | 5.34946  |                                               |
| 10 | 78866614 | 78866807 | KD2-H4K8ac_peak_4007 | 6.99815  |                                               |
| 10 | 79473724 | 79474003 | KD2-H4K8ac_peak_4008 | 3.72574  |                                               |
| 10 | 79606693 | 79607137 | KD2-H4K8ac_peak_4009 | 7.76329  |                                               |
| 10 | 79632147 | 79632458 | KD2-H4K8ac_peak_4010 | 5.20998  |                                               |
| 10 | 79637217 | 79637883 | KD2-H4K8ac_peak_4011 | 16.19273 |                                               |
| 10 | 79638101 | 79638776 | KD2-H4K8ac_peak_4012 | 13.73635 |                                               |
| 10 | 79639004 | 79639452 | KD2-H4K8ac_peak_4013 | 7.1181   |                                               |
| 10 | 79685769 | 79687329 | KD2-H4K8ac_peak_4014 | 13.92465 | DLG5_ENSG00000151208;DLG5-AS1_ENSG00000233871 |
| 10 | 79788889 | 79789245 | KD2-H4K8ac_peak_4015 | 5.14125  | POLR3A_ENSG00000148606                        |
| 10 | 79790688 | 79790901 | KD2-H4K8ac_peak_4016 | 6.16888  |                                               |
| 10 | 79793696 | 79794093 | KD2-H4K8ac_peak_4017 | 9.11031  | RPS24_ENSG00000138326                         |
| 10 | 79807388 | 79807746 | KD2-H4K8ac_peak_4018 | 11.43353 |                                               |
| 10 | 79819663 | 79820072 | KD2-H4K8ac_peak_4019 | 4.77079  |                                               |
| 10 | 79845439 | 79845811 | KD2-H4K8ac_peak_4020 | 8.37231  |                                               |
| 10 | 79899041 | 79899469 | KD2-H4K8ac_peak_4021 | 6.65673  |                                               |
| 10 | 79954915 | 79955391 | KD2-H4K8ac_peak_4022 | 6.65673  |                                               |
| 10 | 79963203 | 79963713 | KD2-H4K8ac_peak_4023 | 5.88845  |                                               |
| 10 | 79964231 | 79964621 | KD2-H4K8ac_peak_4024 | 7.47462  |                                               |
| 10 | 79964920 | 79965124 | KD2-H4K8ac_peak_4025 | 5.30799  |                                               |
| 10 | 79970964 | 79971240 | KD2-H4K8ac_peak_4026 | 5.51783  |                                               |
| 10 | 79971662 | 79971914 | KD2-H4K8ac_peak_4027 | 9.63487  |                                               |
| 10 | 79972257 | 79973016 | KD2-H4K8ac_peak_4028 | 13.12288 |                                               |
| 10 | 80048662 | 80049476 | KD2-H4K8ac_peak_4029 | 6.1846   |                                               |
| 10 | 80050835 | 80051187 | KD2-H4K8ac_peak_4030 | 6.16747  |                                               |
| 10 | 80052181 | 80053175 | KD2-H4K8ac_peak_4031 | 8.10216  | RP11-90J7.2_ENSG00000229543                   |
| 10 | 80053704 | 80054176 | KD2-H4K8ac_peak_4032 | 12.17278 | RP11-90J7.2_ENSG00000229543                   |
| 10 | 80055397 | 80055782 | KD2-H4K8ac_peak_4033 | 6.99815  |                                               |
| 10 | 80061368 | 80061874 | KD2-H4K8ac_peak_4034 | 5.57044  |                                               |
| 10 | 80062224 | 80062958 | KD2-H4K8ac_peak_4035 | 22.21705 |                                               |
| 10 | 80063470 | 80064057 | KD2-H4K8ac_peak_4036 | 9.36516  |                                               |
| 10 | 80064321 | 80064544 | KD2-H4K8ac_peak_4037 | 6.24114  |                                               |
| 10 | 80076316 | 80077122 | KD2-H4K8ac_peak_4038 | 8.59579  |                                               |
| 10 | 80161541 | 80162261 | KD2-H4K8ac_peak_4039 | 7.95934  |                                               |
| 10 | 80166442 | 80167617 | KD2-H4K8ac_peak_4040 | 12.93209 |                                               |
| 10 | 80167964 | 80168785 | KD2-H4K8ac_peak_4041 | 10.19949 |                                               |
| 10 | 80169092 | 80169367 | KD2-H4K8ac_peak_4042 | 6.53538  |                                               |
| 10 | 80177857 | 80178052 | KD2-H4K8ac_peak_4043 | 7.0983   |                                               |
| 10 | 80180485 | 80181056 | KD2-H4K8ac_peak_4044 | 7.47462  |                                               |
| 10 | 80193573 | 80193950 | KD2-H4K8ac_peak_4045 | 8.23274  |                                               |
| 10 | 80194160 | 80195327 | KD2-H4K8ac_peak_4046 | 8.86099  |                                               |

|    |          |          |                      |          |
|----|----------|----------|----------------------|----------|
| 10 | 80195811 | 80196379 | KD2-H4K8ac_peak_4047 | 8.4716   |
| 10 | 80201780 | 80202021 | KD2-H4K8ac_peak_4048 | 9.73431  |
| 10 | 80202263 | 80202491 | KD2-H4K8ac_peak_4049 | 8.30974  |
| 10 | 80202914 | 80203305 | KD2-H4K8ac_peak_4050 | 18.57315 |
| 10 | 80224559 | 80225631 | KD2-H4K8ac_peak_4051 | 9.1707   |
| 10 | 80230533 | 80231542 | KD2-H4K8ac_peak_4052 | 12.37731 |
| 10 | 80270294 | 80270677 | KD2-H4K8ac_peak_4053 | 9.15069  |
| 10 | 80284585 | 80284854 | KD2-H4K8ac_peak_4054 | 5.14125  |
| 10 | 80302282 | 80302495 | KD2-H4K8ac_peak_4055 | 5.29352  |
| 10 | 80339571 | 80339774 | KD2-H4K8ac_peak_4056 | 8.17902  |
| 10 | 80343989 | 80344671 | KD2-H4K8ac_peak_4057 | 5.61377  |
| 10 | 80394706 | 80394902 | KD2-H4K8ac_peak_4058 | 5.45396  |
| 10 | 80416123 | 80416660 | KD2-H4K8ac_peak_4059 | 15.10495 |
| 10 | 80444255 | 80444480 | KD2-H4K8ac_peak_4060 | 4.06758  |
| 10 | 80444961 | 80445155 | KD2-H4K8ac_peak_4061 | 5.54647  |
| 10 | 80448275 | 80448530 | KD2-H4K8ac_peak_4062 | 9.1707   |
| 10 | 80448890 | 80449408 | KD2-H4K8ac_peak_4063 | 8.5092   |
| 10 | 80463394 | 80463742 | KD2-H4K8ac_peak_4064 | 4.16871  |
| 10 | 80485837 | 80486270 | KD2-H4K8ac_peak_4065 | 6.1846   |
| 10 | 80488697 | 80488893 | KD2-H4K8ac_peak_4066 | 6.36319  |
| 10 | 80502233 | 80502919 | KD2-H4K8ac_peak_4067 | 20.99972 |
| 10 | 80503693 | 80505109 | KD2-H4K8ac_peak_4068 | 17.05477 |
| 10 | 80505740 | 80506433 | KD2-H4K8ac_peak_4069 | 11.50346 |
| 10 | 80514943 | 80515250 | KD2-H4K8ac_peak_4070 | 5.73016  |
| 10 | 80516518 | 80516780 | KD2-H4K8ac_peak_4071 | 6.97919  |
| 10 | 80531907 | 80532156 | KD2-H4K8ac_peak_4072 | 4.211    |
| 10 | 80561958 | 80562627 | KD2-H4K8ac_peak_4073 | 9.1707   |
| 10 | 80562845 | 80563091 | KD2-H4K8ac_peak_4074 | 9.96798  |
| 10 | 80563404 | 80563754 | KD2-H4K8ac_peak_4075 | 9.36516  |
| 10 | 80564273 | 80564590 | KD2-H4K8ac_peak_4076 | 11.00004 |
| 10 | 80567177 | 80567501 | KD2-H4K8ac_peak_4077 | 6.32754  |
| 10 | 80621101 | 80621303 | KD2-H4K8ac_peak_4078 | 8.20667  |
| 10 | 80621498 | 80621885 | KD2-H4K8ac_peak_4079 | 5.9696   |
| 10 | 80622796 | 80623025 | KD2-H4K8ac_peak_4080 | 6.82618  |
| 10 | 80655315 | 80655530 | KD2-H4K8ac_peak_4081 | 5.14125  |
| 10 | 80665607 | 80665895 | KD2-H4K8ac_peak_4082 | 6.66692  |
| 10 | 80704275 | 80704615 | KD2-H4K8ac_peak_4083 | 7.40111  |
| 10 | 80722065 | 80722318 | KD2-H4K8ac_peak_4084 | 5.88845  |
| 10 | 80723697 | 80723910 | KD2-H4K8ac_peak_4085 | 7.74292  |
| 10 | 80724237 | 80724690 | KD2-H4K8ac_peak_4086 | 7.78826  |
| 10 | 80724959 | 80725490 | KD2-H4K8ac_peak_4087 | 12.82393 |
| 10 | 80725754 | 80726052 | KD2-H4K8ac_peak_4088 | 8.20667  |
| 10 | 80732100 | 80734176 | KD2-H4K8ac_peak_4089 | 18.94636 |
| 10 | 80756328 | 80757138 | KD2-H4K8ac_peak_4090 | 6.83936  |
| 10 | 80768687 | 80769177 | KD2-H4K8ac_peak_4091 | 8.17902  |
| 10 | 80774497 | 80774699 | KD2-H4K8ac_peak_4092 | 6.42097  |

|    |          |          |                      |          |                                                 |
|----|----------|----------|----------------------|----------|-------------------------------------------------|
| 10 | 80778037 | 80778358 | KD2-H4K8ac_peak_4093 | 6.40297  |                                                 |
| 10 | 80782737 | 80783077 | KD2-H4K8ac_peak_4094 | 5.08628  |                                                 |
| 10 | 80784401 | 80785084 | KD2-H4K8ac_peak_4095 | 15.59774 |                                                 |
| 10 | 80785445 | 80786472 | KD2-H4K8ac_peak_4096 | 8.55271  |                                                 |
| 10 | 80806966 | 80808942 | KD2-H4K8ac_peak_4097 | 8.16906  |                                                 |
| 10 | 80826351 | 80826955 | KD2-H4K8ac_peak_4098 | 15.81711 | ZMIZ1-AS1_ENSG00000224596                       |
| 10 | 80827202 | 80827548 | KD2-H4K8ac_peak_4099 | 12.84642 | ZMIZ1-AS1_ENSG00000224596                       |
| 10 | 80827789 | 80828572 | KD2-H4K8ac_peak_4100 | 11.05467 | ZMIZ1-AS1_ENSG00000224596;ZMIZ1_ENSG00000108175 |
| 10 | 80828842 | 80829350 | KD2-H4K8ac_peak_4101 | 8.23274  | ZMIZ1_ENSG00000108175                           |
| 10 | 80889062 | 80889835 | KD2-H4K8ac_peak_4102 | 8.23274  |                                                 |
| 10 | 80891894 | 80892610 | KD2-H4K8ac_peak_4103 | 7.95934  |                                                 |
| 10 | 80908897 | 80909203 | KD2-H4K8ac_peak_4104 | 4.98072  |                                                 |
| 10 | 80919995 | 80920197 | KD2-H4K8ac_peak_4105 | 11.3394  |                                                 |
| 10 | 80936990 | 80937481 | KD2-H4K8ac_peak_4106 | 12.93209 |                                                 |
| 10 | 80937771 | 80938337 | KD2-H4K8ac_peak_4107 | 17.55491 |                                                 |
| 10 | 80939084 | 80939357 | KD2-H4K8ac_peak_4108 | 6.98244  |                                                 |
| 10 | 80939787 | 80940275 | KD2-H4K8ac_peak_4109 | 8.82366  |                                                 |
| 10 | 80954312 | 80954842 | KD2-H4K8ac_peak_4110 | 5.61067  |                                                 |
| 10 | 80957042 | 80957269 | KD2-H4K8ac_peak_4111 | 3.97079  |                                                 |
| 10 | 80962560 | 80962977 | KD2-H4K8ac_peak_4112 | 6.66359  |                                                 |
| 10 | 80963994 | 80964354 | KD2-H4K8ac_peak_4113 | 9.95119  |                                                 |
| 10 | 80978876 | 80979288 | KD2-H4K8ac_peak_4114 | 7.27281  |                                                 |
| 10 | 80979865 | 80980506 | KD2-H4K8ac_peak_4115 | 15.38707 |                                                 |
| 10 | 80980957 | 80981377 | KD2-H4K8ac_peak_4116 | 7.44324  |                                                 |
| 10 | 80981620 | 80983165 | KD2-H4K8ac_peak_4117 | 12.11734 |                                                 |
| 10 | 80983536 | 80984844 | KD2-H4K8ac_peak_4118 | 13.73635 |                                                 |
| 10 | 80988113 | 80988557 | KD2-H4K8ac_peak_4119 | 9.30297  |                                                 |
| 10 | 80998787 | 80999103 | KD2-H4K8ac_peak_4120 | 5.6746   |                                                 |
| 10 | 81002067 | 81003180 | KD2-H4K8ac_peak_4121 | 14.60723 |                                                 |
| 10 | 81003389 | 81003974 | KD2-H4K8ac_peak_4122 | 13.66685 |                                                 |
| 10 | 81006883 | 81007365 | KD2-H4K8ac_peak_4123 | 6.97919  |                                                 |
| 10 | 81013946 | 81014240 | KD2-H4K8ac_peak_4124 | 4.54729  |                                                 |
| 10 | 81018023 | 81018399 | KD2-H4K8ac_peak_4125 | 6.05809  |                                                 |
| 10 | 81019481 | 81019698 | KD2-H4K8ac_peak_4126 | 5.1685   |                                                 |
| 10 | 81020792 | 81021025 | KD2-H4K8ac_peak_4127 | 11.89502 |                                                 |
| 10 | 81021612 | 81021854 | KD2-H4K8ac_peak_4128 | 7.1181   |                                                 |
| 10 | 81023473 | 81024176 | KD2-H4K8ac_peak_4129 | 5.29555  |                                                 |
| 10 | 81025617 | 81025864 | KD2-H4K8ac_peak_4130 | 5.09296  |                                                 |
| 10 | 81026322 | 81026974 | KD2-H4K8ac_peak_4131 | 6.25869  |                                                 |
| 10 | 81028137 | 81029051 | KD2-H4K8ac_peak_4132 | 11.0821  |                                                 |
| 10 | 81029286 | 81029803 | KD2-H4K8ac_peak_4133 | 7.70067  |                                                 |
| 10 | 81030161 | 81030670 | KD2-H4K8ac_peak_4134 | 9.90914  |                                                 |
| 10 | 81031095 | 81031697 | KD2-H4K8ac_peak_4135 | 9.90914  |                                                 |
| 10 | 81032174 | 81033164 | KD2-H4K8ac_peak_4136 | 11.58876 |                                                 |
| 10 | 81033478 | 81033970 | KD2-H4K8ac_peak_4137 | 5.4779   |                                                 |
| 10 | 81034424 | 81036143 | KD2-H4K8ac_peak_4138 | 13.91698 |                                                 |

|    |          |          |                      |          |                                                                              |
|----|----------|----------|----------------------|----------|------------------------------------------------------------------------------|
| 10 | 81106345 | 81106882 | KD2-H4K8ac_peak_4139 | 9.16531  | PPIF_ENSG00000108179                                                         |
| 10 | 81107308 | 81107908 | KD2-H4K8ac_peak_4140 | 7.36799  | PPIF_ENSG00000108179                                                         |
| 10 | 81156979 | 81157205 | KD2-H4K8ac_peak_4141 | 6.65673  |                                                                              |
| 10 | 81157576 | 81157846 | KD2-H4K8ac_peak_4142 | 6.87784  |                                                                              |
| 10 | 81159294 | 81159815 | KD2-H4K8ac_peak_4143 | 9.74423  |                                                                              |
| 10 | 81160664 | 81161402 | KD2-H4K8ac_peak_4144 | 7.76329  |                                                                              |
| 10 | 81184855 | 81185165 | KD2-H4K8ac_peak_4145 | 3.87414  |                                                                              |
| 10 | 81663680 | 81664971 | KD2-H4K8ac_peak_4146 | 8.5092   | MBL1P_ENSG00000242600                                                        |
| 10 | 81741208 | 81742015 | KD2-H4K8ac_peak_4147 | 11.5744  | SFTPD_ENSG00000133661;ZNRFP2P3_ENSG00000235924;RP11-479O17.7_ENSG00000225100 |
| 10 | 81782483 | 81782675 | KD2-H4K8ac_peak_4148 | 6.16888  |                                                                              |
| 10 | 81837789 | 81838831 | KD2-H4K8ac_peak_4149 | 20.47312 | TMEM254-AS1_ENSG00000230091;TMEM254_ENSG00000133678                          |
| 10 | 81892162 | 81892464 | KD2-H4K8ac_peak_4150 | 7.73264  | PLAC9_ENSG00000189129                                                        |
| 10 | 81964701 | 81965742 | KD2-H4K8ac_peak_4151 | 6.65673  | ANXA11_ENSG00000122359                                                       |
| 10 | 82117036 | 82117596 | KD2-H4K8ac_peak_4152 | 20.67885 | DYDC1_ENSG00000170788                                                        |
| 10 | 82168361 | 82168806 | KD2-H4K8ac_peak_4153 | 10.96455 | FAM213A_ENSG00000122378                                                      |
| 10 | 82203733 | 82204100 | KD2-H4K8ac_peak_4154 | 6.8836   |                                                                              |
| 10 | 82213205 | 82213552 | KD2-H4K8ac_peak_4155 | 6.83936  | TSPAN14_ENSG00000108219                                                      |
| 10 | 82214054 | 82214551 | KD2-H4K8ac_peak_4156 | 9.81419  | TSPAN14_ENSG00000108219                                                      |
| 10 | 82219051 | 82219664 | KD2-H4K8ac_peak_4157 | 9.11031  |                                                                              |
| 10 | 82224743 | 82225344 | KD2-H4K8ac_peak_4158 | 10.05606 |                                                                              |
| 10 | 84836327 | 84836584 | KD2-H4K8ac_peak_4159 | 6.16888  |                                                                              |
| 10 | 85340415 | 85340654 | KD2-H4K8ac_peak_4160 | 5.08628  |                                                                              |
| 10 | 85899338 | 85899651 | KD2-H4K8ac_peak_4161 | 8.85813  | GHITM_ENSG00000165678;RP11-338I21.1_ENSG00000271933                          |
| 10 | 86088470 | 86088850 | KD2-H4K8ac_peak_4162 | 7.0754   | CCSER2_ENSG00000107771                                                       |
| 10 | 88004757 | 88005166 | KD2-H4K8ac_peak_4163 | 13.78165 |                                                                              |
| 10 | 88005384 | 88006308 | KD2-H4K8ac_peak_4164 | 4.211    |                                                                              |
| 10 | 88013386 | 88013803 | KD2-H4K8ac_peak_4165 | 5.54647  |                                                                              |
| 10 | 88024485 | 88024898 | KD2-H4K8ac_peak_4166 | 4.33139  | MIR346_ENSG00000199104                                                       |
| 10 | 88126273 | 88126503 | KD2-H4K8ac_peak_4167 | 6.0073   | GRID1_ENSG00000182771                                                        |
| 10 | 88126715 | 88127446 | KD2-H4K8ac_peak_4168 | 7.36799  | GRID1_ENSG00000182771                                                        |
| 10 | 88136676 | 88136944 | KD2-H4K8ac_peak_4169 | 7.40314  |                                                                              |
| 10 | 88159901 | 88160481 | KD2-H4K8ac_peak_4170 | 6.40297  |                                                                              |
| 10 | 88281084 | 88281456 | KD2-H4K8ac_peak_4171 | 5.59859  | WAPAL_ENSG00000062650;RP11-77P6.2_ENSG00000227896                            |
| 10 | 88281766 | 88282155 | KD2-H4K8ac_peak_4172 | 10.44656 | WAPAL_ENSG00000062650;RP11-77P6.2_ENSG00000227896                            |
| 10 | 88406275 | 88406508 | KD2-H4K8ac_peak_4173 | 6.40683  |                                                                              |
| 10 | 88425602 | 88425818 | KD2-H4K8ac_peak_4174 | 5.92591  |                                                                              |
| 10 | 88434047 | 88434279 | KD2-H4K8ac_peak_4175 | 6.8108   |                                                                              |
| 10 | 88441113 | 88441317 | KD2-H4K8ac_peak_4176 | 6.40683  |                                                                              |
| 10 | 88470372 | 88472156 | KD2-H4K8ac_peak_4177 | 16.54484 |                                                                              |
| 10 | 88515620 | 88515981 | KD2-H4K8ac_peak_4178 | 8.86099  | RP11-359E3.4_ENSG00000272631;BMPR1A_ENSG00000107779                          |
| 10 | 88516417 | 88516825 | KD2-H4K8ac_peak_4179 | 7.25989  | RP11-359E3.4_ENSG00000272631;BMPR1A_ENSG00000107779                          |
| 10 | 88777477 | 88777850 | KD2-H4K8ac_peak_4180 | 9.63487  |                                                                              |
| 10 | 88779611 | 88779838 | KD2-H4K8ac_peak_4181 | 4.59928  | FAM25A_ENSG00000188100                                                       |
| 10 | 88854184 | 88854615 | KD2-H4K8ac_peak_4182 | 7.47462  | FAM35A_ENSG00000122376                                                       |
| 10 | 88854983 | 88855317 | KD2-H4K8ac_peak_4183 | 10.96455 |                                                                              |
| 10 | 89101943 | 89102266 | KD2-H4K8ac_peak_4184 | 10.96455 | NUTM2A-AS1_ENSG00000223482;LINC00863_ENSG00000224914                         |

|    |          |          |                      |          |                                                                               |
|----|----------|----------|----------------------|----------|-------------------------------------------------------------------------------|
| 10 | 89102551 | 89102920 | KD2-H4K8ac_peak_4185 | 7.70289  | NUTM2A-AS1_ENSG00000223482;LINC00863_ENSG00000224914                          |
| 10 | 89264148 | 89264497 | KD2-H4K8ac_peak_4186 | 8.55271  | MINPP1_ENSG00000107789                                                        |
| 10 | 89419449 | 89420089 | KD2-H4K8ac_peak_4187 | 12.10284 | RP11-57C13.3_ENSG00000196566;PAPSS2_ENSG00000198682                           |
| 10 | 89577526 | 89577912 | KD2-H4K8ac_peak_4188 | 7.49599  | CFL1P1_ENSG00000223820                                                        |
| 10 | 89578402 | 89578915 | KD2-H4K8ac_peak_4189 | 5.54647  | CFL1P1_ENSG00000223820                                                        |
| 10 | 89621454 | 89622032 | KD2-H4K8ac_peak_4190 | 11.22681 | PTEN_ENSG00000171862                                                          |
| 10 | 89622769 | 89623133 | KD2-H4K8ac_peak_4191 | 7.1181   | KLLN_ENSG00000227268;PTEN_ENSG00000171862                                     |
| 10 | 89623407 | 89623737 | KD2-H4K8ac_peak_4192 | 10.29842 | KLLN_ENSG00000227268;PTEN_ENSG00000171862                                     |
| 10 | 89623963 | 89624187 | KD2-H4K8ac_peak_4193 | 6.67092  | KLLN_ENSG00000227268                                                          |
| 10 | 89824713 | 89825323 | KD2-H4K8ac_peak_4194 | 4.86324  |                                                                               |
| 10 | 90002553 | 90002802 | KD2-H4K8ac_peak_4195 | 6.37652  |                                                                               |
| 10 | 90145295 | 90145569 | KD2-H4K8ac_peak_4196 | 12.06346 |                                                                               |
| 10 | 90639660 | 90640728 | KD2-H4K8ac_peak_4197 | 14.56955 | STAMBPL1_ENSG00000138134                                                      |
| 10 | 90750724 | 90750933 | KD2-H4K8ac_peak_4198 | 6.67538  | ACTA2_ENSG00000107796;FAS_ENSG00000026103                                     |
| 10 | 91011259 | 91011538 | KD2-H4K8ac_peak_4199 | 10.19949 |                                                                               |
| 10 | 91044481 | 91044831 | KD2-H4K8ac_peak_4200 | 7.11925  | RP11-149I23.3_ENSG00000232110                                                 |
| 10 | 91174035 | 91174343 | KD2-H4K8ac_peak_4201 | 6.97919  | LIPA_ENSG00000107798;IFIT5_ENSG00000152778                                    |
| 10 | 91174676 | 91175067 | KD2-H4K8ac_peak_4202 | 5.38581  | LIPA_ENSG00000107798;IFIT5_ENSG00000152778                                    |
| 10 | 91404453 | 91405037 | KD2-H4K8ac_peak_4203 | 20.18584 | PANK1_ENSG00000152782;RP11-80H5.5_ENSG00000249962;RP11-80H5.2_ENSG00000232936 |
| 10 | 91460835 | 91461104 | KD2-H4K8ac_peak_4204 | 12.25733 | KIF20B_ENSG00000138182                                                        |
| 10 | 91461427 | 91461655 | KD2-H4K8ac_peak_4205 | 8.74596  | KIF20B_ENSG00000138182                                                        |
| 10 | 92631772 | 92631977 | KD2-H4K8ac_peak_4206 | 7.36799  | RPP30_ENSG00000148688                                                         |
| 10 | 92794381 | 92794584 | KD2-H4K8ac_peak_4207 | 6.16888  |                                                                               |
| 10 | 92980549 | 92980774 | KD2-H4K8ac_peak_4208 | 8.55271  | PCGF5_ENSG00000180628                                                         |
| 10 | 93058350 | 93058691 | KD2-H4K8ac_peak_4209 | 7.22457  |                                                                               |
| 10 | 93169055 | 93170651 | KD2-H4K8ac_peak_4210 | 11.89502 | HECTD2_ENSG00000165338                                                        |
| 10 | 93349104 | 93349331 | KD2-H4K8ac_peak_4211 | 4.47369  |                                                                               |
| 10 | 93351921 | 93352136 | KD2-H4K8ac_peak_4212 | 3.75035  |                                                                               |
| 10 | 93431796 | 93432429 | KD2-H4K8ac_peak_4213 | 6.25869  |                                                                               |
| 10 | 93441197 | 93441501 | KD2-H4K8ac_peak_4214 | 5.71749  |                                                                               |
| 10 | 93558283 | 93558863 | KD2-H4K8ac_peak_4215 | 7.13615  | TNKS2-AS1_ENSG00000228701;TNKS2_ENSG00000107854                               |
| 10 | 93646868 | 93647772 | KD2-H4K8ac_peak_4216 | 16.61426 |                                                                               |
| 10 | 93667956 | 93668635 | KD2-H4K8ac_peak_4217 | 11.79585 | FGFBP3_ENSG00000174721;RP11-402D21.2_ENSG00000272817                          |
| 10 | 94050982 | 94051464 | KD2-H4K8ac_peak_4218 | 14.98671 | CPEB3_ENSG00000107864;MARCH5_ENSG00000198060                                  |
| 10 | 94333286 | 94333720 | KD2-H4K8ac_peak_4219 | 7.0754   | IDE_ENSG00000119912                                                           |
| 10 | 94333977 | 94334200 | KD2-H4K8ac_peak_4220 | 9.65086  | IDE_ENSG00000119912                                                           |
| 10 | 94350916 | 94351352 | KD2-H4K8ac_peak_4221 | 5.54647  |                                                                               |
| 10 | 94404172 | 94404372 | KD2-H4K8ac_peak_4222 | 5.14125  |                                                                               |
| 10 | 94448750 | 94448946 | KD2-H4K8ac_peak_4223 | 6.13909  | HHEX_ENSG00000152804                                                          |
| 10 | 94449703 | 94450064 | KD2-H4K8ac_peak_4224 | 6.83936  |                                                                               |
| 10 | 94603309 | 94603597 | KD2-H4K8ac_peak_4225 | 7.13615  |                                                                               |
| 10 | 94607952 | 94608961 | KD2-H4K8ac_peak_4226 | 12.84642 |                                                                               |
| 10 | 95255002 | 95255195 | KD2-H4K8ac_peak_4227 | 9.15329  |                                                                               |
| 10 | 95302651 | 95302879 | KD2-H4K8ac_peak_4228 | 9.02371  |                                                                               |
| 10 | 95390764 | 95391010 | KD2-H4K8ac_peak_4229 | 6.64891  |                                                                               |
| 10 | 95461622 | 95461868 | KD2-H4K8ac_peak_4230 | 4.98318  | FRA10AC1_ENSG00000148690                                                      |



|    |           |          |                      |          |                                                         |
|----|-----------|----------|----------------------|----------|---------------------------------------------------------|
| 10 | 95609194  | 95609433 | KD2-H4K8ac_peak_4231 | 5.73839  |                                                         |
| 10 | 95653286  | 95654097 | KD2-H4K8ac_peak_4232 | 15.81711 | SLC35G1_ENSG00000176273                                 |
| 10 | 95753333  | 95753945 | KD2-H4K8ac_peak_4233 | 10.96455 | PLCE1_ENSG00000138193                                   |
| 10 | 96162386  | 96162601 | KD2-H4K8ac_peak_4234 | 6.0073   | TBC1D12_ENSG00000108239                                 |
| 10 | 96304411  | 96304606 | KD2-H4K8ac_peak_4235 | 11.2938  | HELLS_ENSG00000119969                                   |
| 10 | 96943121  | 96944085 | KD2-H4K8ac_peak_4236 | 37.89986 | PAWRP1_ENSG00000225533                                  |
| 10 | 97050308  | 97051219 | KD2-H4K8ac_peak_4237 | 12.06346 | PDLIM1_ENSG00000107438                                  |
| 10 | 97453356  | 97453642 | KD2-H4K8ac_peak_4238 | 8.74596  | TCTN3_ENSG00000119977                                   |
| 10 | 97667299  | 97667594 | KD2-H4K8ac_peak_4239 | 6.0605   | C10orf131_ENSG00000173088                               |
| 10 | 97802798  | 97804143 | KD2-H4K8ac_peak_4240 | 23.52296 | CCNJ_ENSG00000107443                                    |
| 10 | 97849495  | 97850590 | KD2-H4K8ac_peak_4241 | 10.05606 | ENTPD1-AS1_ENSG00000226688                              |
| 10 | 97884437  | 97884799 | KD2-H4K8ac_peak_4242 | 14.74047 |                                                         |
| 10 | 97889208  | 97890535 | KD2-H4K8ac_peak_4243 | 13.87818 | ZNF518A_ENSG00000177853                                 |
| 10 | 98134909  | 98135420 | KD2-H4K8ac_peak_4244 | 10.0692  |                                                         |
| 10 | 98201005  | 98201389 | KD2-H4K8ac_peak_4245 | 4.77079  |                                                         |
| 10 | 98346129  | 98347224 | KD2-H4K8ac_peak_4246 | 14.4458  | TM9SF3_ENSG00000077147                                  |
| 10 | 98479633  | 98480867 | KD2-H4K8ac_peak_4247 | 21.11201 | PIK3AP1_ENSG00000155629                                 |
| 10 | 98591558  | 98592620 | KD2-H4K8ac_peak_4248 | 21.3105  | LCOR_ENSG00000196233                                    |
| 10 | 98834787  | 98835002 | KD2-H4K8ac_peak_4249 | 7.79898  |                                                         |
| 10 | 98899706  | 98900568 | KD2-H4K8ac_peak_4250 | 9.51625  |                                                         |
| 10 | 98944886  | 98945851 | KD2-H4K8ac_peak_4251 | 12.5605  | SLIT1_ENSG00000187122                                   |
| 10 | 98956016  | 98956438 | KD2-H4K8ac_peak_4252 | 12.00273 |                                                         |
| 10 | 99052021  | 99052216 | KD2-H4K8ac_peak_4253 | 8.53092  | ARHGAP19-SLIT1_ENSG00000269891;ARHGAP19_ENSG00000213390 |
| 10 | 99094557  | 99095029 | KD2-H4K8ac_peak_4254 | 7.28628  | FRAT2_ENSG00000181274;RP11-452K12.4_ENSG00000225850     |
| 10 | 99161346  | 99161564 | KD2-H4K8ac_peak_4255 | 9.06369  | RRP12_ENSG00000052749;RP11-452K12.7_ENSG00000231970     |
| 10 | 99166354  | 99166858 | KD2-H4K8ac_peak_4256 | 7.98152  |                                                         |
| 10 | 99186097  | 99186379 | KD2-H4K8ac_peak_4257 | 11.24702 | AL355490.1_ENSG00000224474;PGAM1_ENSG00000171314        |
| 10 | 99205454  | 99205693 | KD2-H4K8ac_peak_4258 | 10.46264 | EXOSC1_ENSG00000171311;ZDHHC16_ENSG00000171307          |
| 10 | 99205970  | 99206311 | KD2-H4K8ac_peak_4259 | 13.81781 | EXOSC1_ENSG00000171311;ZDHHC16_ENSG00000171307          |
| 10 | 99309652  | 99310075 | KD2-H4K8ac_peak_4260 | 6.8836   |                                                         |
| 10 | 99332327  | 99332661 | KD2-H4K8ac_peak_4261 | 4.19765  | ANKRD2_ENSG00000165887                                  |
| 10 | 99392938  | 99393184 | KD2-H4K8ac_peak_4262 | 9.63487  | MORN4_ENSG00000171160                                   |
| 10 | 99418824  | 99419052 | KD2-H4K8ac_peak_4263 | 6.8836   |                                                         |
| 10 | 99419906  | 99420370 | KD2-H4K8ac_peak_4264 | 7.27716  |                                                         |
| 10 | 99446780  | 99447353 | KD2-H4K8ac_peak_4265 | 13.51255 | AVPIL_ENSG00000119986                                   |
| 10 | 99461383  | 99461731 | KD2-H4K8ac_peak_4266 | 3.75035  |                                                         |
| 10 | 99472944  | 99474618 | KD2-H4K8ac_peak_4267 | 19.38373 | MARVELD1_ENSG00000155254                                |
| 10 | 99496380  | 99496748 | KD2-H4K8ac_peak_4268 | 11.89502 | ZFYVE27_ENSG00000155256                                 |
| 10 | 99496981  | 99497296 | KD2-H4K8ac_peak_4269 | 7.40314  | ZFYVE27_ENSG00000155256                                 |
| 10 | 99540786  | 99541069 | KD2-H4K8ac_peak_4270 | 8.02571  |                                                         |
| 10 | 99609446  | 99609784 | KD2-H4K8ac_peak_4271 | 4.86324  | LINC00866_ENSG00000227356;GOLGA7B_ENSG00000155265       |
| 10 | 99649017  | 99649437 | KD2-H4K8ac_peak_4272 | 12.25441 |                                                         |
| 10 | 99674329  | 99675092 | KD2-H4K8ac_peak_4273 | 10.05606 |                                                         |
| 10 | 99790554  | 99791123 | KD2-H4K8ac_peak_4274 | 8.17902  | CRTAC1_ENSG00000095713                                  |
| 10 | 99894582  | 99895141 | KD2-H4K8ac_peak_4275 | 14.8083  | R3HCC1L_ENSG00000166024                                 |
| 10 | 100027613 | 1E+08    | KD2-H4K8ac_peak_4276 | 9.36516  | LOXL4_ENSG00000138131                                   |

|    |           |          |                      |          |                                                                                             |
|----|-----------|----------|----------------------|----------|---------------------------------------------------------------------------------------------|
| 10 | 100055280 | 1E+08    | KD2-H4K8ac_peak_4277 | 9.73431  |                                                                                             |
| 10 | 100068688 | 1E+08    | KD2-H4K8ac_peak_4278 | 8.59579  |                                                                                             |
| 10 | 100069565 | 1E+08    | KD2-H4K8ac_peak_4279 | 5.54647  |                                                                                             |
| 10 | 100081203 | 1E+08    | KD2-H4K8ac_peak_4280 | 8.23274  |                                                                                             |
| 10 | 100174607 | 1E+08    | KD2-H4K8ac_peak_4281 | 10.53377 | PYROXD2_ENSG00000119943                                                                     |
| 10 | 100206076 | 1E+08    | KD2-H4K8ac_peak_4282 | 11.92978 | HPS1_ENSG00000107521                                                                        |
| 10 | 100227634 | 1E+08    | KD2-H4K8ac_peak_4283 | 6.40297  |                                                                                             |
| 10 | 100766775 | 1.01E+08 | KD2-H4K8ac_peak_4284 | 6.66692  |                                                                                             |
| 10 | 100767641 | 1.01E+08 | KD2-H4K8ac_peak_4285 | 5.25071  |                                                                                             |
| 10 | 101088877 | 1.01E+08 | KD2-H4K8ac_peak_4286 | 17.17257 | CNNM1_ENSG00000119946                                                                       |
| 10 | 101190035 | 1.01E+08 | KD2-H4K8ac_peak_4287 | 8.23274  | GOT1_ENSG00000120053;RP11-441O15.3_ENSG00000224934                                          |
| 10 | 101190715 | 1.01E+08 | KD2-H4K8ac_peak_4288 | 11.86082 | GOT1_ENSG00000120053;RP11-441O15.3_ENSG00000224934                                          |
| 10 | 101380626 | 1.01E+08 | KD2-H4K8ac_peak_4289 | 9.20193  | SLC25A28_ENSG00000155287;RP11-85A1.3_ENSG00000260475                                        |
| 10 | 101419241 | 1.01E+08 | KD2-H4K8ac_peak_4290 | 5.82799  | ENTPD7_ENSG00000198018                                                                      |
| 10 | 101491521 | 1.01E+08 | KD2-H4K8ac_peak_4291 | 15.9336  | COX15_ENSG00000014919                                                                       |
| 10 | 101492258 | 1.01E+08 | KD2-H4K8ac_peak_4292 | 7.12754  | COX15_ENSG00000014919                                                                       |
| 10 | 101945450 | 1.02E+08 | KD2-H4K8ac_peak_4293 | 6.99815  |                                                                                             |
| 10 | 101988875 | 1.02E+08 | KD2-H4K8ac_peak_4294 | 17.14886 | CHUK_ENSG00000213341;RP11-316M21.6_ENSG00000227492                                          |
| 10 | 102027026 | 1.02E+08 | KD2-H4K8ac_peak_4295 | 16.23223 | CWF19L1_ENSG00000095485                                                                     |
| 10 | 102046018 | 1.02E+08 | KD2-H4K8ac_peak_4296 | 10.96455 | BLOC1S2_ENSG00000196072                                                                     |
| 10 | 102106375 | 1.02E+08 | KD2-H4K8ac_peak_4297 | 6.8713   | RP11-34D15.2_ENSG00000231188;SCD_ENSG00000099194                                            |
| 10 | 102107006 | 1.02E+08 | KD2-H4K8ac_peak_4298 | 7.95563  | RP11-34D15.2_ENSG00000231188;SCD_ENSG00000099194                                            |
| 10 | 102133413 | 1.02E+08 | KD2-H4K8ac_peak_4299 | 10.73134 | LINC00263_ENSG00000235823                                                                   |
| 10 | 102133982 | 1.02E+08 | KD2-H4K8ac_peak_4300 | 8.09303  | LINC00263_ENSG00000235823                                                                   |
| 10 | 102289600 | 1.02E+08 | KD2-H4K8ac_peak_4301 | 7.13615  | SEC31B_ENSG00000075826;NDUFB8_ENSG00000255339;NDUFB8_ENSG00000166136;HIF1AN_ENSG00000166135 |
| 10 | 102321947 | 1.02E+08 | KD2-H4K8ac_peak_4302 | 7.1181   |                                                                                             |
| 10 | 102381131 | 1.02E+08 | KD2-H4K8ac_peak_4303 | 5.88845  |                                                                                             |
| 10 | 102414560 | 1.02E+08 | KD2-H4K8ac_peak_4304 | 13.80019 |                                                                                             |
| 10 | 102445215 | 1.02E+08 | KD2-H4K8ac_peak_4305 | 5.60968  |                                                                                             |
| 10 | 102446960 | 1.02E+08 | KD2-H4K8ac_peak_4306 | 5.57044  |                                                                                             |
| 10 | 102448093 | 1.02E+08 | KD2-H4K8ac_peak_4307 | 7.47462  |                                                                                             |
| 10 | 102469288 | 1.02E+08 | KD2-H4K8ac_peak_4308 | 9.63487  |                                                                                             |
| 10 | 102472857 | 1.02E+08 | KD2-H4K8ac_peak_4309 | 11.05467 |                                                                                             |
| 10 | 102473578 | 1.02E+08 | KD2-H4K8ac_peak_4310 | 21.1285  |                                                                                             |
| 10 | 102527108 | 1.03E+08 | KD2-H4K8ac_peak_4311 | 8.84031  |                                                                                             |
| 10 | 102548049 | 1.03E+08 | KD2-H4K8ac_peak_4312 | 7.07117  |                                                                                             |
| 10 | 102551420 | 1.03E+08 | KD2-H4K8ac_peak_4313 | 8.55552  |                                                                                             |
| 10 | 102565786 | 1.03E+08 | KD2-H4K8ac_peak_4314 | 4.75875  |                                                                                             |
| 10 | 102568192 | 1.03E+08 | KD2-H4K8ac_peak_4315 | 7.47462  |                                                                                             |
| 10 | 102672787 | 1.03E+08 | KD2-H4K8ac_peak_4316 | 16.49944 | RP11-179B2.2_ENSG00000272572;FAM178A_ENSG00000119906                                        |
| 10 | 102728619 | 1.03E+08 | KD2-H4K8ac_peak_4317 | 6.66359  | SEMA4G_ENSG00000095539                                                                      |
| 10 | 102746997 | 1.03E+08 | KD2-H4K8ac_peak_4318 | 8.28234  | MRPL43_ENSG00000055950;C10orf2_ENSG00000107815                                              |
| 10 | 102756325 | 1.03E+08 | KD2-H4K8ac_peak_4319 | 6.0605   | LZTS2_ENSG00000107816                                                                       |
| 10 | 102757740 | 1.03E+08 | KD2-H4K8ac_peak_4320 | 7.51054  |                                                                                             |
| 10 | 102759089 | 1.03E+08 | KD2-H4K8ac_peak_4321 | 9.26408  |                                                                                             |
| 10 | 102772389 | 1.03E+08 | KD2-H4K8ac_peak_4322 | 9.402    |                                                                                             |

|    |           |          |                      |          |                                                       |
|----|-----------|----------|----------------------|----------|-------------------------------------------------------|
| 10 | 102778474 | 1.03E+08 | KD2-H4K8ac_peak_4323 | 11.44456 |                                                       |
| 10 | 102790576 | 1.03E+08 | KD2-H4K8ac_peak_4324 | 9.36516  | PDZD7_ENSG00000186862;SFXN3_ENSG00000107819           |
| 10 | 102802149 | 1.03E+08 | KD2-H4K8ac_peak_4325 | 12.82393 |                                                       |
| 10 | 102820544 | 1.03E+08 | KD2-H4K8ac_peak_4326 | 13.83097 | RP11-108L7.15_ENSG00000273162;KAZALD1_ENSG00000107821 |
| 10 | 102821041 | 1.03E+08 | KD2-H4K8ac_peak_4327 | 5.4779   | RP11-108L7.15_ENSG00000273162;KAZALD1_ENSG00000107821 |
| 10 | 102826060 | 1.03E+08 | KD2-H4K8ac_peak_4328 | 6.40683  |                                                       |
| 10 | 102827053 | 1.03E+08 | KD2-H4K8ac_peak_4329 | 4.67342  |                                                       |
| 10 | 102827494 | 1.03E+08 | KD2-H4K8ac_peak_4330 | 6.2781   |                                                       |
| 10 | 102873104 | 1.03E+08 | KD2-H4K8ac_peak_4331 | 4.42765  |                                                       |
| 10 | 102882991 | 1.03E+08 | KD2-H4K8ac_peak_4332 | 9.6589   | HUG1_ENSG00000269259                                  |
| 10 | 102891298 | 1.03E+08 | KD2-H4K8ac_peak_4333 | 6.40297  | TLX1NB_ENSG00000236311                                |
| 10 | 102901812 | 1.03E+08 | KD2-H4K8ac_peak_4334 | 10.43145 |                                                       |
| 10 | 102975625 | 1.03E+08 | KD2-H4K8ac_peak_4335 | 6.19483  |                                                       |
| 10 | 103051060 | 1.03E+08 | KD2-H4K8ac_peak_4336 | 13.22091 |                                                       |
| 10 | 103052558 | 1.03E+08 | KD2-H4K8ac_peak_4337 | 5.75757  |                                                       |
| 10 | 103070231 | 1.03E+08 | KD2-H4K8ac_peak_4338 | 8.85813  | RP11-107I14.2_ENSG00000225208                         |
| 10 | 103070855 | 1.03E+08 | KD2-H4K8ac_peak_4339 | 6.25869  | RP11-107I14.2_ENSG00000225208                         |
| 10 | 103113202 | 1.03E+08 | KD2-H4K8ac_peak_4340 | 9.36665  | BTRC_ENSG00000166167                                  |
| 10 | 103113986 | 1.03E+08 | KD2-H4K8ac_peak_4341 | 10.08707 | BTRC_ENSG00000166167                                  |
| 10 | 103318431 | 1.03E+08 | KD2-H4K8ac_peak_4342 | 6.0605   |                                                       |
| 10 | 103319502 | 1.03E+08 | KD2-H4K8ac_peak_4343 | 4.39858  |                                                       |
| 10 | 103320498 | 1.03E+08 | KD2-H4K8ac_peak_4344 | 4.211    |                                                       |
| 10 | 103326361 | 1.03E+08 | KD2-H4K8ac_peak_4345 | 12.08081 |                                                       |
| 10 | 103329434 | 1.03E+08 | KD2-H4K8ac_peak_4346 | 15.22356 | DPCD_ENSG00000166171                                  |
| 10 | 103347229 | 1.03E+08 | KD2-H4K8ac_peak_4347 | 7.74292  | POLL_ENSG00000166169                                  |
| 10 | 103454203 | 1.03E+08 | KD2-H4K8ac_peak_4348 | 9.26408  | FBXW4_ENSG00000107829                                 |
| 10 | 103542816 | 1.04E+08 | KD2-H4K8ac_peak_4349 | 5.30799  | NPM3_ENSG00000107833                                  |
| 10 | 103577564 | 1.04E+08 | KD2-H4K8ac_peak_4350 | 6.25869  | MGEA5_ENSG00000198408;KCNIP2-AS1_ENSG00000226009      |
| 10 | 103578840 | 1.04E+08 | KD2-H4K8ac_peak_4351 | 8.17902  | MGEA5_ENSG00000198408;KCNIP2-AS1_ENSG00000226009      |
| 10 | 103591008 | 1.04E+08 | KD2-H4K8ac_peak_4352 | 5.9696   |                                                       |
| 10 | 103815560 | 1.04E+08 | KD2-H4K8ac_peak_4353 | 7.49599  | C10orf76_ENSG00000120029                              |
| 10 | 103816450 | 1.04E+08 | KD2-H4K8ac_peak_4354 | 7.76329  | C10orf76_ENSG00000120029                              |
| 10 | 103825083 | 1.04E+08 | KD2-H4K8ac_peak_4355 | 12.96152 | HPS6_ENSG00000166189                                  |
| 10 | 103874089 | 1.04E+08 | KD2-H4K8ac_peak_4356 | 10.43601 |                                                       |
| 10 | 103874885 | 1.04E+08 | KD2-H4K8ac_peak_4357 | 9.58942  |                                                       |
| 10 | 103876819 | 1.04E+08 | KD2-H4K8ac_peak_4358 | 11.05467 |                                                       |
| 10 | 103877452 | 1.04E+08 | KD2-H4K8ac_peak_4359 | 7.98621  |                                                       |
| 10 | 103878390 | 1.04E+08 | KD2-H4K8ac_peak_4360 | 5.27406  |                                                       |
| 10 | 103879678 | 1.04E+08 | KD2-H4K8ac_peak_4361 | 8.65175  | LDB1_ENSG00000198728                                  |
| 10 | 103880481 | 1.04E+08 | KD2-H4K8ac_peak_4362 | 8.43115  | LDB1_ENSG00000198728                                  |
| 10 | 103881063 | 1.04E+08 | KD2-H4K8ac_peak_4363 | 10.90543 | LDB1_ENSG00000198728                                  |
| 10 | 103892167 | 1.04E+08 | KD2-H4K8ac_peak_4364 | 6.75488  | PPRC1_ENSG00000148840                                 |
| 10 | 103892886 | 1.04E+08 | KD2-H4K8ac_peak_4365 | 8.4716   | PPRC1_ENSG00000148840                                 |
| 10 | 103911360 | 1.04E+08 | KD2-H4K8ac_peak_4366 | 11.81678 | NOLC1_ENSG00000166197                                 |
| 10 | 103912256 | 1.04E+08 | KD2-H4K8ac_peak_4367 | 6.85193  | NOLC1_ENSG00000166197                                 |
| 10 | 103929586 | 1.04E+08 | KD2-H4K8ac_peak_4368 | 6.99815  |                                                       |

|    |           |          |                      |          |                                                        |
|----|-----------|----------|----------------------|----------|--------------------------------------------------------|
| 10 | 103986103 | 1.04E+08 | KD2-H4K8ac_peak_4369 | 10.19949 | ELOVL3_ENSG00000119915                                 |
| 10 | 104004317 | 1.04E+08 | KD2-H4K8ac_peak_4370 | 6.99815  | GBF1_ENSG00000107862                                   |
| 10 | 104005349 | 1.04E+08 | KD2-H4K8ac_peak_4371 | 6.66692  | GBF1_ENSG00000107862                                   |
| 10 | 104169158 | 1.04E+08 | KD2-H4K8ac_peak_4372 | 6.90231  |                                                        |
| 10 | 104179694 | 1.04E+08 | KD2-H4K8ac_peak_4373 | 4.68059  | FBXL15_ENSG00000107872                                 |
| 10 | 104180535 | 1.04E+08 | KD2-H4K8ac_peak_4374 | 8.23274  | PSD_ENSG00000059915                                    |
| 10 | 104181009 | 1.04E+08 | KD2-H4K8ac_peak_4375 | 4.37809  | PSD_ENSG00000059915                                    |
| 10 | 104191999 | 1.04E+08 | KD2-H4K8ac_peak_4376 | 11.55418 | CUEDC2_ENSG00000107874                                 |
| 10 | 104192715 | 1.04E+08 | KD2-H4K8ac_peak_4377 | 6.30229  | CUEDC2_ENSG00000107874                                 |
| 10 | 104209058 | 1.04E+08 | KD2-H4K8ac_peak_4378 | 9.1707   | RP11-18I14.10_ENSG00000269609                          |
| 10 | 104209929 | 1.04E+08 | KD2-H4K8ac_peak_4379 | 9.34195  | RP11-18I14.10_ENSG00000269609                          |
| 10 | 104210460 | 1.04E+08 | KD2-H4K8ac_peak_4380 | 7.36799  | RP11-18I14.10_ENSG00000269609;C10orf95_ENSG00000120055 |
| 10 | 104220585 | 1.04E+08 | KD2-H4K8ac_peak_4381 | 19.72117 | TMEM180_ENSG00000138111                                |
| 10 | 104263770 | 1.04E+08 | KD2-H4K8ac_peak_4382 | 11.89502 | SUFU_ENSG00000107882                                   |
| 10 | 104387272 | 1.04E+08 | KD2-H4K8ac_peak_4383 | 14.43794 |                                                        |
| 10 | 104388358 | 1.04E+08 | KD2-H4K8ac_peak_4384 | 9.36665  |                                                        |
| 10 | 104388836 | 1.04E+08 | KD2-H4K8ac_peak_4385 | 11.66477 |                                                        |
| 10 | 104401628 | 1.04E+08 | KD2-H4K8ac_peak_4386 | 6.99815  |                                                        |
| 10 | 104402104 | 1.04E+08 | KD2-H4K8ac_peak_4387 | 25.44327 | RP11-47A8.5_ENSG00000272933                            |
| 10 | 104403500 | 1.04E+08 | KD2-H4K8ac_peak_4388 | 12.99417 | RP11-47A8.5_ENSG00000272933;TRIM8_ENSG00000171206      |
| 10 | 104404927 | 1.04E+08 | KD2-H4K8ac_peak_4389 | 5.14125  | TRIM8_ENSG00000171206                                  |
| 10 | 104420711 | 1.04E+08 | KD2-H4K8ac_peak_4390 | 4.89305  |                                                        |
| 10 | 104433890 | 1.04E+08 | KD2-H4K8ac_peak_4391 | 7.01658  |                                                        |
| 10 | 104434835 | 1.04E+08 | KD2-H4K8ac_peak_4392 | 5.14125  |                                                        |
| 10 | 104473461 | 1.04E+08 | KD2-H4K8ac_peak_4393 | 10.29842 | ARL3_ENSG00000138175;SFXN2_ENSG00000156398             |
| 10 | 104502520 | 1.05E+08 | KD2-H4K8ac_peak_4394 | 7.36933  | WBP1L_ENSG00000166272                                  |
| 10 | 104535960 | 1.05E+08 | KD2-H4K8ac_peak_4395 | 4.42765  |                                                        |
| 10 | 104613634 | 1.05E+08 | KD2-H4K8ac_peak_4396 | 13.73635 | C10orf32_ENSG00000166275;C10orf32-ASMT_ENSG00000270316 |
| 10 | 104629008 | 1.05E+08 | KD2-H4K8ac_peak_4397 | 8.79106  | AS3MT_ENSG00000214435;RNU6-372P_ENSG00000201080        |
| 10 | 104678334 | 1.05E+08 | KD2-H4K8ac_peak_4398 | 6.99194  | CNNM2_ENSG00000148842                                  |
| 10 | 104953250 | 1.05E+08 | KD2-H4K8ac_peak_4399 | 5.13615  | NT5C2_ENSG00000076685                                  |
| 10 | 105036215 | 1.05E+08 | KD2-H4K8ac_peak_4400 | 5.14125  | INA_ENSG00000148798                                    |
| 10 | 105036983 | 1.05E+08 | KD2-H4K8ac_peak_4401 | 6.83936  | INA_ENSG00000148798                                    |
| 10 | 105111420 | 1.05E+08 | KD2-H4K8ac_peak_4402 | 10.96455 | PCGF6_ENSG00000156374                                  |
| 10 | 105126838 | 1.05E+08 | KD2-H4K8ac_peak_4403 | 10.29344 | TAF5_ENSG00000148835                                   |
| 10 | 105155875 | 1.05E+08 | KD2-H4K8ac_peak_4404 | 4.06758  | USMG5_ENSG00000173915;PDCD11_ENSG00000148843           |
| 10 | 105240291 | 1.05E+08 | KD2-H4K8ac_peak_4405 | 4.42765  |                                                        |
| 10 | 105253654 | 1.05E+08 | KD2-H4K8ac_peak_4406 | 5.01002  | NEURL1_ENSG00000107954                                 |
| 10 | 105262616 | 1.05E+08 | KD2-H4K8ac_peak_4407 | 9.16531  |                                                        |
| 10 | 105377117 | 1.05E+08 | KD2-H4K8ac_peak_4408 | 7.47462  |                                                        |
| 10 | 105377751 | 1.05E+08 | KD2-H4K8ac_peak_4409 | 16.79595 |                                                        |
| 10 | 105378970 | 1.05E+08 | KD2-H4K8ac_peak_4410 | 5.81222  |                                                        |
| 10 | 105475911 | 1.05E+08 | KD2-H4K8ac_peak_4411 | 6.04107  |                                                        |
| 10 | 105482831 | 1.05E+08 | KD2-H4K8ac_peak_4412 | 4.19765  |                                                        |
| 10 | 105486804 | 1.05E+08 | KD2-H4K8ac_peak_4413 | 14.80472 |                                                        |
| 10 | 105489564 | 1.05E+08 | KD2-H4K8ac_peak_4414 | 7.146    |                                                        |

|    |           |          |                      |          |                                                 |
|----|-----------|----------|----------------------|----------|-------------------------------------------------|
| 10 | 105492259 | 1.05E+08 | KD2-H4K8ac_peak_4415 | 13.81781 |                                                 |
| 10 | 105532623 | 1.06E+08 | KD2-H4K8ac_peak_4416 | 8.34752  |                                                 |
| 10 | 105554162 | 1.06E+08 | KD2-H4K8ac_peak_4417 | 7.01658  |                                                 |
| 10 | 105566045 | 1.06E+08 | KD2-H4K8ac_peak_4418 | 5.47943  |                                                 |
| 10 | 105572142 | 1.06E+08 | KD2-H4K8ac_peak_4419 | 4.47369  |                                                 |
| 10 | 105583307 | 1.06E+08 | KD2-H4K8ac_peak_4420 | 8.17557  |                                                 |
| 10 | 105614337 | 1.06E+08 | KD2-H4K8ac_peak_4421 | 4.20044  | SH3PXD2A_ENSG00000107957                        |
| 10 | 105614744 | 1.06E+08 | KD2-H4K8ac_peak_4422 | 11.89502 | SH3PXD2A_ENSG00000107957                        |
| 10 | 105667594 | 1.06E+08 | KD2-H4K8ac_peak_4423 | 6.90231  |                                                 |
| 10 | 105677119 | 1.06E+08 | KD2-H4K8ac_peak_4424 | 8.79106  | OBFC1_ENSG00000107960                           |
| 10 | 105725799 | 1.06E+08 | KD2-H4K8ac_peak_4425 | 8.26945  | SLK_ENSG00000065613                             |
| 10 | 105726377 | 1.06E+08 | KD2-H4K8ac_peak_4426 | 4.211    | SLK_ENSG00000065613                             |
| 10 | 105880968 | 1.06E+08 | KD2-H4K8ac_peak_4427 | 12.00597 | SFR1_ENSG00000156384                            |
| 10 | 105991816 | 1.06E+08 | KD2-H4K8ac_peak_4428 | 14.43704 | WDR96_ENSG00000197748                           |
| 10 | 106014197 | 1.06E+08 | KD2-H4K8ac_peak_4429 | 8.85813  |                                                 |
| 10 | 106028507 | 1.06E+08 | KD2-H4K8ac_peak_4430 | 10.02417 | MIR4482-1_ENSG00000266852;GSTO2_ENSG00000065621 |
| 10 | 106059283 | 1.06E+08 | KD2-H4K8ac_peak_4431 | 8.51832  |                                                 |
| 10 | 106059971 | 1.06E+08 | KD2-H4K8ac_peak_4432 | 6.85193  |                                                 |
| 10 | 106060998 | 1.06E+08 | KD2-H4K8ac_peak_4433 | 3.7063   |                                                 |
| 10 | 106088693 | 1.06E+08 | KD2-H4K8ac_peak_4434 | 7.94441  |                                                 |
| 10 | 106097976 | 1.06E+08 | KD2-H4K8ac_peak_4435 | 7.36799  | ITPRIP_ENSG00000148841                          |
| 10 | 106656209 | 1.07E+08 | KD2-H4K8ac_peak_4436 | 6.0073   |                                                 |
| 10 | 108467377 | 1.08E+08 | KD2-H4K8ac_peak_4437 | 6.56211  |                                                 |
| 10 | 108475225 | 1.08E+08 | KD2-H4K8ac_peak_4438 | 8.30974  |                                                 |
| 10 | 108475984 | 1.08E+08 | KD2-H4K8ac_peak_4439 | 4.86824  |                                                 |
| 10 | 108476451 | 1.08E+08 | KD2-H4K8ac_peak_4440 | 5.14125  |                                                 |
| 10 | 108477110 | 1.08E+08 | KD2-H4K8ac_peak_4441 | 5.16439  |                                                 |
| 10 | 108483981 | 1.08E+08 | KD2-H4K8ac_peak_4442 | 7.87794  |                                                 |
| 10 | 108486488 | 1.08E+08 | KD2-H4K8ac_peak_4443 | 6.40683  |                                                 |
| 10 | 108574813 | 1.09E+08 | KD2-H4K8ac_peak_4444 | 11.30637 |                                                 |
| 10 | 108576950 | 1.09E+08 | KD2-H4K8ac_peak_4445 | 4.77079  |                                                 |
| 10 | 108665956 | 1.09E+08 | KD2-H4K8ac_peak_4446 | 7.12754  |                                                 |
| 10 | 108720415 | 1.09E+08 | KD2-H4K8ac_peak_4447 | 8.79557  |                                                 |
| 10 | 108755695 | 1.09E+08 | KD2-H4K8ac_peak_4448 | 7.01964  |                                                 |
| 10 | 108759705 | 1.09E+08 | KD2-H4K8ac_peak_4449 | 5.15777  |                                                 |
| 10 | 108793485 | 1.09E+08 | KD2-H4K8ac_peak_4450 | 6.83936  |                                                 |
| 10 | 108802309 | 1.09E+08 | KD2-H4K8ac_peak_4451 | 4.77079  |                                                 |
| 10 | 108820248 | 1.09E+08 | KD2-H4K8ac_peak_4452 | 6.51023  |                                                 |
| 10 | 108831902 | 1.09E+08 | KD2-H4K8ac_peak_4453 | 6.16888  |                                                 |
| 10 | 108862093 | 1.09E+08 | KD2-H4K8ac_peak_4454 | 4.98318  |                                                 |
| 10 | 108923806 | 1.09E+08 | KD2-H4K8ac_peak_4455 | 9.95119  | SORCS1_ENSG00000108018                          |
| 10 | 109304715 | 1.09E+08 | KD2-H4K8ac_peak_4456 | 8.17902  |                                                 |
| 10 | 109305612 | 1.09E+08 | KD2-H4K8ac_peak_4457 | 8.30974  |                                                 |
| 10 | 109674313 | 1.1E+08  | KD2-H4K8ac_peak_4458 | 15.69572 |                                                 |
| 10 | 111652768 | 1.12E+08 | KD2-H4K8ac_peak_4459 | 6.8836   |                                                 |
| 10 | 111682937 | 1.12E+08 | KD2-H4K8ac_peak_4460 | 13.70753 | XPNPEP1_ENSG00000108039                         |

|    |           |          |                      |          |                                                    |
|----|-----------|----------|----------------------|----------|----------------------------------------------------|
| 10 | 111737207 | 1.12E+08 | KD2-H4K8ac_peak_4461 | 8.79557  |                                                    |
| 10 | 111766897 | 1.12E+08 | KD2-H4K8ac_peak_4462 | 21.09577 |                                                    |
| 10 | 111768078 | 1.12E+08 | KD2-H4K8ac_peak_4463 | 13.44374 |                                                    |
| 10 | 111912146 | 1.12E+08 | KD2-H4K8ac_peak_4464 | 4.24345  |                                                    |
| 10 | 111970105 | 1.12E+08 | KD2-H4K8ac_peak_4465 | 6.65673  |                                                    |
| 10 | 112064255 | 1.12E+08 | KD2-H4K8ac_peak_4466 | 9.31907  | SMNDC1_ENSG00000119953                             |
| 10 | 112065610 | 1.12E+08 | KD2-H4K8ac_peak_4467 | 4.81242  | SMNDC1_ENSG00000119953                             |
| 10 | 112219951 | 1.12E+08 | KD2-H4K8ac_peak_4468 | 6.30229  |                                                    |
| 10 | 112257249 | 1.12E+08 | KD2-H4K8ac_peak_4469 | 7.76329  | DUSP5_ENSG00000138166                              |
| 10 | 112326149 | 1.12E+08 | KD2-H4K8ac_peak_4470 | 8.6308   | SMC3_ENSG00000108055                               |
| 10 | 112327597 | 1.12E+08 | KD2-H4K8ac_peak_4471 | 7.43893  | SMC3_ENSG00000108055                               |
| 10 | 112403727 | 1.12E+08 | KD2-H4K8ac_peak_4472 | 9.26408  | RBM20_ENSG00000203867                              |
| 10 | 112540540 | 1.13E+08 | KD2-H4K8ac_peak_4473 | 6.25869  |                                                    |
| 10 | 112541234 | 1.13E+08 | KD2-H4K8ac_peak_4474 | 6.66692  |                                                    |
| 10 | 112545800 | 1.13E+08 | KD2-H4K8ac_peak_4475 | 5.34636  |                                                    |
| 10 | 112547870 | 1.13E+08 | KD2-H4K8ac_peak_4476 | 9.57101  |                                                    |
| 10 | 112549230 | 1.13E+08 | KD2-H4K8ac_peak_4477 | 6.66692  |                                                    |
| 10 | 112551370 | 1.13E+08 | KD2-H4K8ac_peak_4478 | 7.27716  |                                                    |
| 10 | 112552845 | 1.13E+08 | KD2-H4K8ac_peak_4479 | 6.40683  |                                                    |
| 10 | 112554621 | 1.13E+08 | KD2-H4K8ac_peak_4480 | 6.8836   |                                                    |
| 10 | 112619011 | 1.13E+08 | KD2-H4K8ac_peak_4481 | 8.1233   |                                                    |
| 10 | 112620648 | 1.13E+08 | KD2-H4K8ac_peak_4482 | 6.64891  |                                                    |
| 10 | 112630350 | 1.13E+08 | KD2-H4K8ac_peak_4483 | 8.74596  | RP11-313D6.3_ENSG00000232470;PDCD4_ENSG00000150593 |
| 10 | 112631025 | 1.13E+08 | KD2-H4K8ac_peak_4484 | 8.28234  | PDCD4-AS1_ENSG00000203497;PDCD4_ENSG00000150593    |
| 10 | 112631743 | 1.13E+08 | KD2-H4K8ac_peak_4485 | 19.43192 | PDCD4-AS1_ENSG00000203497;PDCD4_ENSG00000150593    |
| 10 | 112678427 | 1.13E+08 | KD2-H4K8ac_peak_4486 | 14.06758 | BBIP1_ENSG00000214413;SHOC2_ENSG00000108061        |
| 10 | 112898961 | 1.13E+08 | KD2-H4K8ac_peak_4487 | 5.25071  |                                                    |
| 10 | 113943089 | 1.14E+08 | KD2-H4K8ac_peak_4488 | 7.47462  |                                                    |
| 10 | 113970285 | 1.14E+08 | KD2-H4K8ac_peak_4489 | 6.66692  |                                                    |
| 10 | 113974659 | 1.14E+08 | KD2-H4K8ac_peak_4490 | 14.87555 | GPAM_ENSG00000119927                               |
| 10 | 113975330 | 1.14E+08 | KD2-H4K8ac_peak_4491 | 13.81781 | GPAM_ENSG00000119927                               |
| 10 | 114206221 | 1.14E+08 | KD2-H4K8ac_peak_4492 | 13.13969 | ZDHHC6_ENSG0000023041;VTI1A_ENSG00000151532        |
| 10 | 114207029 | 1.14E+08 | KD2-H4K8ac_peak_4493 | 14.84212 | ZDHHC6_ENSG0000023041;VTI1A_ENSG00000151532        |
| 10 | 114711169 | 1.15E+08 | KD2-H4K8ac_peak_4494 | 12.42547 | RP11-57H14.2_ENSG00000233547                       |
| 10 | 114711660 | 1.15E+08 | KD2-H4K8ac_peak_4495 | 12.42547 | RP11-57H14.2_ENSG00000233547                       |
| 10 | 115214245 | 1.15E+08 | KD2-H4K8ac_peak_4496 | 10.17698 |                                                    |
| 10 | 115310281 | 1.15E+08 | KD2-H4K8ac_peak_4497 | 4.49837  | HABP2_ENSG00000148702                              |
| 10 | 115439268 | 1.15E+08 | KD2-H4K8ac_peak_4498 | 11.02863 | CASP7_ENSG00000165806                              |
| 10 | 115613687 | 1.16E+08 | KD2-H4K8ac_peak_4499 | 14.8083  | DCLRE1A_ENSG00000198924;NHLRC2_ENSG00000196865     |
| 10 | 115933555 | 1.16E+08 | KD2-H4K8ac_peak_4500 | 4.84794  | C10orf118_ENSG00000165813;MIR2110_ENSG00000238742  |
| 10 | 115934149 | 1.16E+08 | KD2-H4K8ac_peak_4501 | 5.1628   | C10orf118_ENSG00000165813;MIR2110_ENSG00000238742  |
| 10 | 116070174 | 1.16E+08 | KD2-H4K8ac_peak_4502 | 10.21502 |                                                    |
| 10 | 116126497 | 1.16E+08 | KD2-H4K8ac_peak_4503 | 12.96672 |                                                    |
| 10 | 116444208 | 1.16E+08 | KD2-H4K8ac_peak_4504 | 4.70388  | ABLIM1_ENSG00000099204                             |
| 10 | 116527269 | 1.17E+08 | KD2-H4K8ac_peak_4505 | 11.15509 |                                                    |
| 10 | 116581232 | 1.17E+08 | KD2-H4K8ac_peak_4506 | 11.05467 | FAM160B1_ENSG00000151553                           |

|    |           |          |                      |          |                                                   |
|----|-----------|----------|----------------------|----------|---------------------------------------------------|
| 10 | 116852276 | 1.17E+08 | KD2-H4K8ac_peak_4507 | 9.048    | ATRNLI_ENSG00000107518                            |
| 10 | 116853827 | 1.17E+08 | KD2-H4K8ac_peak_4508 | 5.73839  | ATRNLI_ENSG00000107518                            |
| 10 | 118475377 | 1.18E+08 | KD2-H4K8ac_peak_4509 | 4.77079  |                                                   |
| 10 | 118481192 | 1.18E+08 | KD2-H4K8ac_peak_4510 | 4.77079  |                                                   |
| 10 | 118481718 | 1.18E+08 | KD2-H4K8ac_peak_4511 | 7.47462  |                                                   |
| 10 | 118500747 | 1.19E+08 | KD2-H4K8ac_peak_4512 | 7.47462  | HSPA12A_ENSG00000165868                           |
| 10 | 118501422 | 1.19E+08 | KD2-H4K8ac_peak_4513 | 8.2413   | HSPA12A_ENSG00000165868                           |
| 10 | 118502317 | 1.19E+08 | KD2-H4K8ac_peak_4514 | 8.55271  | HSPA12A_ENSG00000165868                           |
| 10 | 118608056 | 1.19E+08 | KD2-H4K8ac_peak_4515 | 4.06758  | RP11-539I5.1_ENSG00000225302;ENO4_ENSG00000188316 |
| 10 | 118651125 | 1.19E+08 | KD2-H4K8ac_peak_4516 | 4.01115  |                                                   |
| 10 | 118764140 | 1.19E+08 | KD2-H4K8ac_peak_4517 | 13.9234  |                                                   |
| 10 | 118975899 | 1.19E+08 | KD2-H4K8ac_peak_4518 | 6.56926  |                                                   |
| 10 | 118976452 | 1.19E+08 | KD2-H4K8ac_peak_4519 | 6.84261  |                                                   |
| 10 | 119134675 | 1.19E+08 | KD2-H4K8ac_peak_4520 | 8.34752  | PDZD8_ENSG00000165650                             |
| 10 | 119135213 | 1.19E+08 | KD2-H4K8ac_peak_4521 | 10.30284 | PDZD8_ENSG00000165650                             |
| 10 | 119262066 | 1.19E+08 | KD2-H4K8ac_peak_4522 | 15.52826 |                                                   |
| 10 | 119805768 | 1.2E+08  | KD2-H4K8ac_peak_4523 | 14.43704 | RAB11FIP2_ENSG00000107560;CASC2_ENSG00000177640   |
| 10 | 119867574 | 1.2E+08  | KD2-H4K8ac_peak_4524 | 4.59928  |                                                   |
| 10 | 120101465 | 1.2E+08  | KD2-H4K8ac_peak_4525 | 14.84212 | FAM204A_ENSG00000165669                           |
| 10 | 120102014 | 1.2E+08  | KD2-H4K8ac_peak_4526 | 6.66692  | FAM204A_ENSG00000165669                           |
| 10 | 120129443 | 1.2E+08  | KD2-H4K8ac_peak_4527 | 7.12754  |                                                   |
| 10 | 120369559 | 1.2E+08  | KD2-H4K8ac_peak_4528 | 6.99815  |                                                   |
| 10 | 120370752 | 1.2E+08  | KD2-H4K8ac_peak_4529 | 4.42765  |                                                   |
| 10 | 120427751 | 1.2E+08  | KD2-H4K8ac_peak_4530 | 4.86324  |                                                   |
| 10 | 120428489 | 1.2E+08  | KD2-H4K8ac_peak_4531 | 4.86324  |                                                   |
| 10 | 120429547 | 1.2E+08  | KD2-H4K8ac_peak_4532 | 11.0722  |                                                   |
| 10 | 120513916 | 1.21E+08 | KD2-H4K8ac_peak_4533 | 6.99815  | CACUL1_ENSG00000151893                            |
| 10 | 120577972 | 1.21E+08 | KD2-H4K8ac_peak_4534 | 4.42765  |                                                   |
| 10 | 120591329 | 1.21E+08 | KD2-H4K8ac_peak_4535 | 8.83582  |                                                   |
| 10 | 120667652 | 1.21E+08 | KD2-H4K8ac_peak_4536 | 10.65724 |                                                   |
| 10 | 120669268 | 1.21E+08 | KD2-H4K8ac_peak_4537 | 10.0089  |                                                   |
| 10 | 120718838 | 1.21E+08 | KD2-H4K8ac_peak_4538 | 6.0073   |                                                   |
| 10 | 120782452 | 1.21E+08 | KD2-H4K8ac_peak_4539 | 9.6261   |                                                   |
| 10 | 120783172 | 1.21E+08 | KD2-H4K8ac_peak_4540 | 6.0073   |                                                   |
| 10 | 120784624 | 1.21E+08 | KD2-H4K8ac_peak_4541 | 7.73132  |                                                   |
| 10 | 120839779 | 1.21E+08 | KD2-H4K8ac_peak_4542 | 13.81781 | EIF3A_ENSG00000107581                             |
| 10 | 120840493 | 1.21E+08 | KD2-H4K8ac_peak_4543 | 8.02571  | EIF3A_ENSG00000107581                             |
| 10 | 120863015 | 1.21E+08 | KD2-H4K8ac_peak_4544 | 6.56926  | FAM45A_ENSG00000119979                            |
| 10 | 120863664 | 1.21E+08 | KD2-H4K8ac_peak_4545 | 12.06346 | FAM45A_ENSG00000119979                            |
| 10 | 120924728 | 1.21E+08 | KD2-H4K8ac_peak_4546 | 15.47237 | SFXN4_ENSG00000183605                             |
| 10 | 120937949 | 1.21E+08 | KD2-H4K8ac_peak_4547 | 25.6154  | PRDX3_ENSG00000165672                             |
| 10 | 120966450 | 1.21E+08 | KD2-H4K8ac_peak_4548 | 12.57297 | GRK5_ENSG00000198873                              |
| 10 | 121130742 | 1.21E+08 | KD2-H4K8ac_peak_4549 | 3.80759  |                                                   |
| 10 | 121301832 | 1.21E+08 | KD2-H4K8ac_peak_4550 | 17.17257 | RGS10_ENSG00000148908                             |
| 10 | 121355728 | 1.21E+08 | KD2-H4K8ac_peak_4551 | 7.59643  | TIAL1_ENSG00000151923                             |
| 10 | 121356216 | 1.21E+08 | KD2-H4K8ac_peak_4552 | 10.86378 | TIAL1_ENSG00000151923                             |

|    |           |          |                      |          |                                                 |
|----|-----------|----------|----------------------|----------|-------------------------------------------------|
| 10 | 121368189 | 1.21E+08 | KD2-H4K8ac_peak_4553 | 10.43925 |                                                 |
| 10 | 121410243 | 1.21E+08 | KD2-H4K8ac_peak_4554 | 10.19949 | BAG3_ENSG00000151929                            |
| 10 | 121485780 | 1.21E+08 | KD2-H4K8ac_peak_4555 | 5.08628  | INPP5F_ENSG00000198825                          |
| 10 | 121577769 | 1.22E+08 | KD2-H4K8ac_peak_4556 | 11.04694 |                                                 |
| 10 | 121631740 | 1.22E+08 | KD2-H4K8ac_peak_4557 | 11.92978 |                                                 |
| 10 | 121632663 | 1.22E+08 | KD2-H4K8ac_peak_4558 | 11.82518 |                                                 |
| 10 | 122610419 | 1.23E+08 | KD2-H4K8ac_peak_4559 | 7.13615  | WDR11-AS1_ENSG00000227165;WDR11_ENSG00000120008 |
| 10 | 122610900 | 1.23E+08 | KD2-H4K8ac_peak_4560 | 12.84642 | WDR11-AS1_ENSG00000227165;WDR11_ENSG00000120008 |
| 10 | 122683457 | 1.23E+08 | KD2-H4K8ac_peak_4561 | 8.1233   |                                                 |
| 10 | 122739018 | 1.23E+08 | KD2-H4K8ac_peak_4562 | 7.70289  | RP11-95I16.2_ENSG00000227307                    |
| 10 | 122739487 | 1.23E+08 | KD2-H4K8ac_peak_4563 | 6.98292  | RP11-95I16.2_ENSG00000227307                    |
| 10 | 122848801 | 1.23E+08 | KD2-H4K8ac_peak_4564 | 5.75452  |                                                 |
| 10 | 123357586 | 1.23E+08 | KD2-H4K8ac_peak_4565 | 8.1235   | FGFR2_ENSG00000066468                           |
| 10 | 123358118 | 1.23E+08 | KD2-H4K8ac_peak_4566 | 18.75732 | FGFR2_ENSG00000066468                           |
| 10 | 123368350 | 1.23E+08 | KD2-H4K8ac_peak_4567 | 8.20938  |                                                 |
| 10 | 123427228 | 1.23E+08 | KD2-H4K8ac_peak_4568 | 6.04107  |                                                 |
| 10 | 123429590 | 1.23E+08 | KD2-H4K8ac_peak_4569 | 6.67474  |                                                 |
| 10 | 123468343 | 1.23E+08 | KD2-H4K8ac_peak_4570 | 4.20044  |                                                 |
| 10 | 123687074 | 1.24E+08 | KD2-H4K8ac_peak_4571 | 8.4716   | ATE1_ENSG00000107669;ATE1-AS1_ENSG00000226864   |
| 10 | 123687749 | 1.24E+08 | KD2-H4K8ac_peak_4572 | 11.58876 | ATE1_ENSG00000107669;ATE1-AS1_ENSG00000226864   |
| 10 | 123734374 | 1.24E+08 | KD2-H4K8ac_peak_4573 | 8.16906  | NSMCE4A_ENSG00000107672                         |
| 10 | 123872391 | 1.24E+08 | KD2-H4K8ac_peak_4574 | 19.6416  |                                                 |
| 10 | 123898250 | 1.24E+08 | KD2-H4K8ac_peak_4575 | 7.79741  |                                                 |
| 10 | 123899604 | 1.24E+08 | KD2-H4K8ac_peak_4576 | 6.40683  |                                                 |
| 10 | 123900253 | 1.24E+08 | KD2-H4K8ac_peak_4577 | 19.30653 |                                                 |
| 10 | 123907815 | 1.24E+08 | KD2-H4K8ac_peak_4578 | 4.86324  |                                                 |
| 10 | 123914197 | 1.24E+08 | KD2-H4K8ac_peak_4579 | 8.90871  |                                                 |
| 10 | 123922070 | 1.24E+08 | KD2-H4K8ac_peak_4580 | 17.70837 |                                                 |
| 10 | 123989886 | 1.24E+08 | KD2-H4K8ac_peak_4581 | 9.1707   |                                                 |
| 10 | 123993020 | 1.24E+08 | KD2-H4K8ac_peak_4582 | 7.76329  |                                                 |
| 10 | 123994626 | 1.24E+08 | KD2-H4K8ac_peak_4583 | 9.1707   |                                                 |
| 10 | 124058522 | 1.24E+08 | KD2-H4K8ac_peak_4584 | 5.59859  |                                                 |
| 10 | 124134264 | 1.24E+08 | KD2-H4K8ac_peak_4585 | 10.08707 | PLEKHA1_ENSG00000107679                         |
| 10 | 124263547 | 1.24E+08 | KD2-H4K8ac_peak_4586 | 6.0073   |                                                 |
| 10 | 124713454 | 1.25E+08 | KD2-H4K8ac_peak_4587 | 10.19949 | C10orf88_ENSG00000119965;PSTK_ENSG00000179988   |
| 10 | 124739763 | 1.25E+08 | KD2-H4K8ac_peak_4588 | 12.84642 |                                                 |
| 10 | 124908101 | 1.25E+08 | KD2-H4K8ac_peak_4589 | 5.40356  | HMX2_ENSG00000188816                            |
| 10 | 124913949 | 1.25E+08 | KD2-H4K8ac_peak_4590 | 13.31016 | BUB3_ENSG00000154473                            |
| 10 | 125108136 | 1.25E+08 | KD2-H4K8ac_peak_4591 | 6.33462  |                                                 |
| 10 | 125111013 | 1.25E+08 | KD2-H4K8ac_peak_4592 | 4.86324  |                                                 |
| 10 | 125114738 | 1.25E+08 | KD2-H4K8ac_peak_4593 | 4.76709  |                                                 |
| 10 | 125117766 | 1.25E+08 | KD2-H4K8ac_peak_4594 | 5.51783  |                                                 |
| 10 | 125503815 | 1.26E+08 | KD2-H4K8ac_peak_4595 | 7.27716  |                                                 |
| 10 | 125972699 | 1.26E+08 | KD2-H4K8ac_peak_4596 | 5.9696   |                                                 |
| 10 | 125983807 | 1.26E+08 | KD2-H4K8ac_peak_4597 | 3.75035  |                                                 |
| 10 | 126042680 | 1.26E+08 | KD2-H4K8ac_peak_4598 | 12.99417 |                                                 |



|    |           |          |                      |          |                                                                                 |
|----|-----------|----------|----------------------|----------|---------------------------------------------------------------------------------|
| 10 | 126077165 | 1.26E+08 | KD2-H4K8ac_peak_4599 | 6.0073   |                                                                                 |
| 10 | 126106940 | 1.26E+08 | KD2-H4K8ac_peak_4600 | 4.06758  | OAT_ENSG00000065154                                                             |
| 10 | 126107686 | 1.26E+08 | KD2-H4K8ac_peak_4601 | 14.74047 | OAT_ENSG00000065154                                                             |
| 10 | 126149972 | 1.26E+08 | KD2-H4K8ac_peak_4602 | 10.08707 | LHPP_ENSG00000107902                                                            |
| 10 | 126212156 | 1.26E+08 | KD2-H4K8ac_peak_4603 | 6.97919  |                                                                                 |
| 10 | 126214015 | 1.26E+08 | KD2-H4K8ac_peak_4604 | 15.81711 |                                                                                 |
| 10 | 126218054 | 1.26E+08 | KD2-H4K8ac_peak_4605 | 6.98517  |                                                                                 |
| 10 | 126218945 | 1.26E+08 | KD2-H4K8ac_peak_4606 | 10.05606 |                                                                                 |
| 10 | 126225011 | 1.26E+08 | KD2-H4K8ac_peak_4607 | 5.88845  |                                                                                 |
| 10 | 126301610 | 1.26E+08 | KD2-H4K8ac_peak_4608 | 5.86783  |                                                                                 |
| 10 | 126336129 | 1.26E+08 | KD2-H4K8ac_peak_4609 | 13.70753 |                                                                                 |
| 10 | 126355968 | 1.26E+08 | KD2-H4K8ac_peak_4610 | 12.0857  |                                                                                 |
| 10 | 126357154 | 1.26E+08 | KD2-H4K8ac_peak_4611 | 5.75452  |                                                                                 |
| 10 | 126359855 | 1.26E+08 | KD2-H4K8ac_peak_4612 | 12.65397 |                                                                                 |
| 10 | 126360695 | 1.26E+08 | KD2-H4K8ac_peak_4613 | 9.33795  |                                                                                 |
| 10 | 126431908 | 1.26E+08 | KD2-H4K8ac_peak_4614 | 11.43353 | FAM53B_ENSG00000189319                                                          |
| 10 | 126479812 | 1.26E+08 | KD2-H4K8ac_peak_4615 | 7.49599  | RP11-12J10.3_ENSG00000258539;METTL10_ENSG00000203791                            |
| 10 | 126480999 | 1.26E+08 | KD2-H4K8ac_peak_4616 | 4.86324  | RP11-12J10.3_ENSG00000258539;METTL10_ENSG00000203791                            |
| 10 | 126489342 | 1.26E+08 | KD2-H4K8ac_peak_4617 | 6.40683  | FAM175B_ENSG00000165660                                                         |
| 10 | 126490441 | 1.26E+08 | KD2-H4K8ac_peak_4618 | 10.19949 | FAM175B_ENSG00000165660                                                         |
| 10 | 126605530 | 1.27E+08 | KD2-H4K8ac_peak_4619 | 4.86324  | RP11-298J20.4_ENSG00000249456                                                   |
| 10 | 126689174 | 1.27E+08 | KD2-H4K8ac_peak_4620 | 3.97079  |                                                                                 |
| 10 | 126696680 | 1.27E+08 | KD2-H4K8ac_peak_4621 | 4.42765  |                                                                                 |
| 10 | 126703181 | 1.27E+08 | KD2-H4K8ac_peak_4622 | 9.73431  |                                                                                 |
| 10 | 126711033 | 1.27E+08 | KD2-H4K8ac_peak_4623 | 12.93209 |                                                                                 |
| 10 | 126714691 | 1.27E+08 | KD2-H4K8ac_peak_4624 | 6.99815  |                                                                                 |
| 10 | 126745300 | 1.27E+08 | KD2-H4K8ac_peak_4625 | 3.97079  |                                                                                 |
| 10 | 126847511 | 1.27E+08 | KD2-H4K8ac_peak_4626 | 9.11031  |                                                                                 |
| 10 | 126848304 | 1.27E+08 | KD2-H4K8ac_peak_4627 | 10.05606 | CTBP2_ENSG00000175029                                                           |
| 10 | 126849391 | 1.27E+08 | KD2-H4K8ac_peak_4628 | 16.11042 | CTBP2_ENSG00000175029                                                           |
| 10 | 127202032 | 1.27E+08 | KD2-H4K8ac_peak_4629 | 6.65673  |                                                                                 |
| 10 | 127202611 | 1.27E+08 | KD2-H4K8ac_peak_4630 | 5.29555  |                                                                                 |
| 10 | 127407409 | 1.27E+08 | KD2-H4K8ac_peak_4631 | 10.96455 | RP11-383C5.4_ENSG00000224023;RP11-383C5.5_ENSG00000234134;EDRF1_ENSG00000107938 |
| 10 | 127408324 | 1.27E+08 | KD2-H4K8ac_peak_4632 | 10.35678 | RP11-383C5.4_ENSG00000224023;RP11-383C5.5_ENSG00000234134;EDRF1_ENSG00000107938 |
| 10 | 127511108 | 1.28E+08 | KD2-H4K8ac_peak_4633 | 10.63441 | UROS_ENSG00000188690;BCCIP_ENSG00000107949                                      |
| 10 | 127584292 | 1.28E+08 | KD2-H4K8ac_peak_4634 | 9.34195  | DHX32_ENSG0000089876;FANK1_ENSG00000203780                                      |
| 10 | 127746064 | 1.28E+08 | KD2-H4K8ac_peak_4635 | 13.80019 |                                                                                 |
| 10 | 127751288 | 1.28E+08 | KD2-H4K8ac_peak_4636 | 5.97274  |                                                                                 |
| 10 | 127924137 | 1.28E+08 | KD2-H4K8ac_peak_4637 | 8.17902  |                                                                                 |
| 10 | 127976473 | 1.28E+08 | KD2-H4K8ac_peak_4638 | 5.14125  |                                                                                 |
| 10 | 128068496 | 1.28E+08 | KD2-H4K8ac_peak_4639 | 4.57371  |                                                                                 |
| 10 | 128076433 | 1.28E+08 | KD2-H4K8ac_peak_4640 | 20.88898 | ADAM12_ENSG00000148848                                                          |
| 10 | 128084513 | 1.28E+08 | KD2-H4K8ac_peak_4641 | 8.17902  |                                                                                 |
| 10 | 128086758 | 1.28E+08 | KD2-H4K8ac_peak_4642 | 7.71478  |                                                                                 |
| 10 | 128593333 | 1.29E+08 | KD2-H4K8ac_peak_4643 | 10.44656 | DOCK1_ENSG00000150760                                                           |
| 10 | 128594563 | 1.29E+08 | KD2-H4K8ac_peak_4644 | 7.69287  | DOCK1_ENSG00000150760                                                           |

|    |           |          |                      |          |                                                      |
|----|-----------|----------|----------------------|----------|------------------------------------------------------|
| 10 | 128606280 | 1.29E+08 | KD2-H4K8ac_peak_4645 | 9.15329  |                                                      |
| 10 | 129013471 | 1.29E+08 | KD2-H4K8ac_peak_4646 | 6.16888  |                                                      |
| 10 | 129860633 | 1.3E+08  | KD2-H4K8ac_peak_4647 | 5.90098  |                                                      |
| 10 | 129924112 | 1.3E+08  | KD2-H4K8ac_peak_4648 | 11.05407 | MKI67_ENSG00000148773                                |
| 10 | 129947855 | 1.3E+08  | KD2-H4K8ac_peak_4649 | 17.50963 |                                                      |
| 10 | 129948503 | 1.3E+08  | KD2-H4K8ac_peak_4650 | 7.146    |                                                      |
| 10 | 130008737 | 1.3E+08  | KD2-H4K8ac_peak_4651 | 13.92307 |                                                      |
| 10 | 130338744 | 1.3E+08  | KD2-H4K8ac_peak_4652 | 11.89502 |                                                      |
| 10 | 130377199 | 1.3E+08  | KD2-H4K8ac_peak_4653 | 5.88845  |                                                      |
| 10 | 130539433 | 1.31E+08 | KD2-H4K8ac_peak_4654 | 7.12754  |                                                      |
| 10 | 131264737 | 1.31E+08 | KD2-H4K8ac_peak_4655 | 25.8903  | MGMT_ENSG00000170430                                 |
| 10 | 131265520 | 1.31E+08 | KD2-H4K8ac_peak_4656 | 13.87818 | MGMT_ENSG00000170430                                 |
| 10 | 131668326 | 1.32E+08 | KD2-H4K8ac_peak_4657 | 12.74171 |                                                      |
| 10 | 131687353 | 1.32E+08 | KD2-H4K8ac_peak_4658 | 6.66692  |                                                      |
| 10 | 131733897 | 1.32E+08 | KD2-H4K8ac_peak_4659 | 6.40683  |                                                      |
| 10 | 131749948 | 1.32E+08 | KD2-H4K8ac_peak_4660 | 5.20998  |                                                      |
| 10 | 131908359 | 1.32E+08 | KD2-H4K8ac_peak_4661 | 10.43145 | LINC00959_ENSG00000237489                            |
| 10 | 131909608 | 1.32E+08 | KD2-H4K8ac_peak_4662 | 8.34752  | LINC00959_ENSG00000237489                            |
| 10 | 131933891 | 1.32E+08 | KD2-H4K8ac_peak_4663 | 6.84261  |                                                      |
| 10 | 131934714 | 1.32E+08 | KD2-H4K8ac_peak_4664 | 14.57259 |                                                      |
| 10 | 131988737 | 1.32E+08 | KD2-H4K8ac_peak_4665 | 9.6247   |                                                      |
| 10 | 133775510 | 1.34E+08 | KD2-H4K8ac_peak_4666 | 7.40111  |                                                      |
| 10 | 133776905 | 1.34E+08 | KD2-H4K8ac_peak_4667 | 6.66692  |                                                      |
| 10 | 133794946 | 1.34E+08 | KD2-H4K8ac_peak_4668 | 15.22643 | BNIP3_ENSG00000176171                                |
| 10 | 133795656 | 1.34E+08 | KD2-H4K8ac_peak_4669 | 22.21705 | BNIP3_ENSG00000176171                                |
| 10 | 133946156 | 1.34E+08 | KD2-H4K8ac_peak_4670 | 7.44366  |                                                      |
| 10 | 133956165 | 1.34E+08 | KD2-H4K8ac_peak_4671 | 11.60333 |                                                      |
| 10 | 133989864 | 1.34E+08 | KD2-H4K8ac_peak_4672 | 4.44748  |                                                      |
| 10 | 133999804 | 1.34E+08 | KD2-H4K8ac_peak_4673 | 4.67342  | RP11-140A10.3_ENSG00000235010;DPYSL4_ENSG00000151640 |
| 10 | 134036406 | 1.34E+08 | KD2-H4K8ac_peak_4674 | 9.11031  |                                                      |
| 10 | 134051040 | 1.34E+08 | KD2-H4K8ac_peak_4675 | 9.95759  |                                                      |
| 10 | 134052507 | 1.34E+08 | KD2-H4K8ac_peak_4676 | 10.45683 |                                                      |
| 10 | 134054246 | 1.34E+08 | KD2-H4K8ac_peak_4677 | 8.2413   |                                                      |
| 10 | 134078049 | 1.34E+08 | KD2-H4K8ac_peak_4678 | 7.05051  |                                                      |
| 10 | 134078734 | 1.34E+08 | KD2-H4K8ac_peak_4679 | 10.81728 |                                                      |
| 10 | 134106558 | 1.34E+08 | KD2-H4K8ac_peak_4680 | 10.7186  |                                                      |
| 10 | 134110523 | 1.34E+08 | KD2-H4K8ac_peak_4681 | 6.85193  |                                                      |
| 10 | 134121772 | 1.34E+08 | KD2-H4K8ac_peak_4682 | 5.61067  |                                                      |
| 10 | 134144953 | 1.34E+08 | KD2-H4K8ac_peak_4683 | 7.76329  | STK32C_ENSG00000165752;LRRC27_ENSG00000148814        |
| 10 | 134145802 | 1.34E+08 | KD2-H4K8ac_peak_4684 | 11.03331 | STK32C_ENSG00000165752;LRRC27_ENSG00000148814        |
| 10 | 134201280 | 1.34E+08 | KD2-H4K8ac_peak_4685 | 5.57044  |                                                      |
| 10 | 134209542 | 1.34E+08 | KD2-H4K8ac_peak_4686 | 13.81781 | PWWP2B_ENSG00000171813                               |
| 10 | 134210759 | 1.34E+08 | KD2-H4K8ac_peak_4687 | 9.0912   | PWWP2B_ENSG00000171813                               |
| 10 | 134231951 | 1.34E+08 | KD2-H4K8ac_peak_4688 | 5.57044  | RP11-432J24.2_ENSG00000231705                        |
| 10 | 134260847 | 1.34E+08 | KD2-H4K8ac_peak_4689 | 12.3187  |                                                      |
| 10 | 134262997 | 1.34E+08 | KD2-H4K8ac_peak_4690 | 6.2781   |                                                      |

|    |           |          |                      |          |                                                 |
|----|-----------|----------|----------------------|----------|-------------------------------------------------|
| 10 | 134266857 | 1.34E+08 | KD2-H4K8ac_peak_4691 | 13.9234  |                                                 |
| 10 | 134330415 | 1.34E+08 | KD2-H4K8ac_peak_4692 | 20.58734 | RP11-432J24.5_ENSG00000226900                   |
| 10 | 134350266 | 1.34E+08 | KD2-H4K8ac_peak_4693 | 8.52559  | INPP5A_ENSG00000068383                          |
| 10 | 134419724 | 1.34E+08 | KD2-H4K8ac_peak_4694 | 6.25869  |                                                 |
| 10 | 134650158 | 1.35E+08 | KD2-H4K8ac_peak_4695 | 6.15357  |                                                 |
| 10 | 134755730 | 1.35E+08 | KD2-H4K8ac_peak_4696 | 11.66477 | TTC40_ENSG00000171811                           |
| 10 | 134800921 | 1.35E+08 | KD2-H4K8ac_peak_4697 | 7.05051  |                                                 |
| 10 | 134801862 | 1.35E+08 | KD2-H4K8ac_peak_4698 | 20.88898 |                                                 |
| 10 | 135074833 | 1.35E+08 | KD2-H4K8ac_peak_4699 | 23.64558 |                                                 |
| 10 | 135122121 | 1.35E+08 | KD2-H4K8ac_peak_4700 | 15.96909 | ZNF511_ENSG00000198546                          |
| 10 | 135132041 | 1.35E+08 | KD2-H4K8ac_peak_4701 | 20.67885 |                                                 |
| 10 | 135137050 | 1.35E+08 | KD2-H4K8ac_peak_4702 | 6.5996   | RP11-122K13.14_ENSG00000270235                  |
| 10 | 135138468 | 1.35E+08 | KD2-H4K8ac_peak_4703 | 4.91674  | RP11-122K13.14_ENSG00000270235                  |
| 10 | 135139033 | 1.35E+08 | KD2-H4K8ac_peak_4704 | 11.28831 | RP11-122K13.14_ENSG00000270235                  |
| 10 | 135170897 | 1.35E+08 | KD2-H4K8ac_peak_4705 | 8.4716   | FUOM_ENSG00000148803                            |
| 10 | 135192826 | 1.35E+08 | KD2-H4K8ac_peak_4706 | 9.402    | PAOX_ENSG00000148832;AL360181.1_ENSG00000268882 |
| 10 | 135207742 | 1.35E+08 | KD2-H4K8ac_peak_4707 | 10.7186  | MTG1_ENSG00000148824                            |
| 10 | 135333591 | 1.35E+08 | KD2-H4K8ac_peak_4708 | 7.47462  | CYP2E1_ENSG00000130649                          |
| 11 | 206959    | 207295   | KD2-H4K8ac_peak_4709 | 9.34989  | BET1L_ENSG00000177951;RIC8A_ENSG00000177963     |
| 11 | 207743    | 207969   | KD2-H4K8ac_peak_4710 | 10.77651 | BET1L_ENSG00000177951;RIC8A_ENSG00000177963     |
| 11 | 208227    | 208437   | KD2-H4K8ac_peak_4711 | 5.30799  | BET1L_ENSG00000177951;RIC8A_ENSG00000177963     |
| 11 | 236065    | 236271   | KD2-H4K8ac_peak_4712 | 4.67342  | SIRT3_ENSG00000142082;PSMD13_ENSG00000185627    |
| 11 | 236590    | 237362   | KD2-H4K8ac_peak_4713 | 21.75906 | SIRT3_ENSG00000142082;PSMD13_ENSG00000185627    |
| 11 | 288616    | 289315   | KD2-H4K8ac_peak_4714 | 12.42761 | ATHL1_ENSG00000142102                           |
| 11 | 355524    | 356066   | KD2-H4K8ac_peak_4715 | 13.88933 |                                                 |
| 11 | 364234    | 364538   | KD2-H4K8ac_peak_4716 | 10.96455 |                                                 |
| 11 | 396634    | 397255   | KD2-H4K8ac_peak_4717 | 16.15695 |                                                 |
| 11 | 406658    | 407115   | KD2-H4K8ac_peak_4718 | 14.74047 |                                                 |
| 11 | 407561    | 407788   | KD2-H4K8ac_peak_4719 | 10.21502 |                                                 |
| 11 | 441869    | 442101   | KD2-H4K8ac_peak_4720 | 6.05995  | ANO9_ENSG00000185101                            |
| 11 | 447738    | 448052   | KD2-H4K8ac_peak_4721 | 7.76329  | PTDSS2_ENSG00000174915                          |
| 11 | 448272    | 448619   | KD2-H4K8ac_peak_4722 | 7.59794  | PTDSS2_ENSG00000174915                          |
| 11 | 450618    | 450828   | KD2-H4K8ac_peak_4723 | 7.69287  |                                                 |
| 11 | 506510    | 506746   | KD2-H4K8ac_peak_4724 | 11.43863 | RNH1_ENSG00000023191                            |
| 11 | 507023    | 507242   | KD2-H4K8ac_peak_4725 | 10.42398 | RNH1_ENSG00000023191                            |
| 11 | 518437    | 518738   | KD2-H4K8ac_peak_4726 | 5.71749  |                                                 |
| 11 | 518990    | 519363   | KD2-H4K8ac_peak_4727 | 13.09607 |                                                 |
| 11 | 535803    | 536316   | KD2-H4K8ac_peak_4728 | 14.30077 | HRAS_ENSG00000174775                            |
| 11 | 554290    | 555052   | KD2-H4K8ac_peak_4729 | 10.5847  |                                                 |
| 11 | 555297    | 555545   | KD2-H4K8ac_peak_4730 | 6.65673  |                                                 |
| 11 | 560302    | 560659   | KD2-H4K8ac_peak_4731 | 15.08926 | C11orf35_ENSG00000185522;RASSF7_ENSG00000099849 |
| 11 | 568747    | 569315   | KD2-H4K8ac_peak_4732 | 20.2003  | MIR210HG_ENSG00000247095;MIR210_ENSG00000199038 |
| 11 | 576203    | 576689   | KD2-H4K8ac_peak_4733 | 7.49599  | PHRF1_ENSG00000070047                           |
| 11 | 616183    | 616377   | KD2-H4K8ac_peak_4734 | 7.51054  | IRF7_ENSG00000185507                            |
| 11 | 694619    | 694918   | KD2-H4K8ac_peak_4735 | 11.33751 | EPS8L2_ENSG00000177106;TMEM80_ENSG00000177042   |
| 11 | 695379    | 695593   | KD2-H4K8ac_peak_4736 | 14.71663 | EPS8L2_ENSG00000177106;TMEM80_ENSG00000177042   |

|    |         |         |                      |          |                                                   |
|----|---------|---------|----------------------|----------|---------------------------------------------------|
| 11 | 695871  | 696341  | KD2-H4K8ac_peak_4737 | 7.18615  | TMEM80_ENSG00000177042                            |
| 11 | 710860  | 711065  | KD2-H4K8ac_peak_4738 | 10.08707 |                                                   |
| 11 | 726175  | 726403  | KD2-H4K8ac_peak_4739 | 7.76329  | AP006621.9_ENSG00000269915                        |
| 11 | 727669  | 728109  | KD2-H4K8ac_peak_4740 | 9.16531  | AP006621.9_ENSG00000269915                        |
| 11 | 728428  | 728631  | KD2-H4K8ac_peak_4741 | 9.11031  |                                                   |
| 11 | 746877  | 747236  | KD2-H4K8ac_peak_4742 | 9.57101  | TALDO1_ENSG00000177156                            |
| 11 | 747495  | 748056  | KD2-H4K8ac_peak_4743 | 9.57101  | TALDO1_ENSG00000177156                            |
| 11 | 777270  | 777911  | KD2-H4K8ac_peak_4744 | 8.58725  | PDDC1_ENSG00000177225;AP006621.5_ENSG00000255284  |
| 11 | 796626  | 796857  | KD2-H4K8ac_peak_4745 | 7.167    |                                                   |
| 11 | 797519  | 798181  | KD2-H4K8ac_peak_4746 | 13.81781 | SLC25A22_ENSG00000177542                          |
| 11 | 798401  | 798683  | KD2-H4K8ac_peak_4747 | 8.30974  | SLC25A22_ENSG00000177542                          |
| 11 | 804535  | 805065  | KD2-H4K8ac_peak_4748 | 11.00004 |                                                   |
| 11 | 805451  | 805807  | KD2-H4K8ac_peak_4749 | 14.80472 |                                                   |
| 11 | 808900  | 809436  | KD2-H4K8ac_peak_4750 | 11.05467 | PIDD_ENSG00000177595;RPLP2_ENSG00000177600        |
| 11 | 810143  | 810432  | KD2-H4K8ac_peak_4751 | 6.58902  | PIDD_ENSG00000177595;RPLP2_ENSG00000177600        |
| 11 | 818937  | 819404  | KD2-H4K8ac_peak_4752 | 16.3889  | PNPLA2_ENSG00000177666                            |
| 11 | 819617  | 819825  | KD2-H4K8ac_peak_4753 | 9.1707   | PNPLA2_ENSG00000177666                            |
| 11 | 842375  | 842764  | KD2-H4K8ac_peak_4754 | 6.84261  | POLR2L_ENSG00000177700;TSPAN4_ENSG00000214063     |
| 11 | 849399  | 849630  | KD2-H4K8ac_peak_4755 | 6.9556   |                                                   |
| 11 | 854533  | 855087  | KD2-H4K8ac_peak_4756 | 6.25869  |                                                   |
| 11 | 855966  | 856713  | KD2-H4K8ac_peak_4757 | 11.36939 |                                                   |
| 11 | 891036  | 891346  | KD2-H4K8ac_peak_4758 | 5.88845  |                                                   |
| 11 | 910985  | 911653  | KD2-H4K8ac_peak_4759 | 12.46522 |                                                   |
| 11 | 918952  | 919505  | KD2-H4K8ac_peak_4760 | 12.25733 |                                                   |
| 11 | 924342  | 925595  | KD2-H4K8ac_peak_4761 | 7.76104  | AP2A2_ENSG00000183020                             |
| 11 | 1330443 | 1330785 | KD2-H4K8ac_peak_4762 | 11.02863 | TOLLIP_ENSG00000078902;TOLLIP-AS1_ENSG00000255153 |
| 11 | 1331144 | 1331587 | KD2-H4K8ac_peak_4763 | 10.35678 | TOLLIP_ENSG00000078902;TOLLIP-AS1_ENSG00000255153 |
| 11 | 1356873 | 1357068 | KD2-H4K8ac_peak_4764 | 6.30229  |                                                   |
| 11 | 1358220 | 1358422 | KD2-H4K8ac_peak_4765 | 8.17902  |                                                   |
| 11 | 1403462 | 1405012 | KD2-H4K8ac_peak_4766 | 16.63953 |                                                   |
| 11 | 1410520 | 1410730 | KD2-H4K8ac_peak_4767 | 7.28628  | BRSK2_ENSG00000174672                             |
| 11 | 1479550 | 1480037 | KD2-H4K8ac_peak_4768 | 8.94469  |                                                   |
| 11 | 1524612 | 1525648 | KD2-H4K8ac_peak_4769 | 14.00658 |                                                   |
| 11 | 1567984 | 1568624 | KD2-H4K8ac_peak_4770 | 10.96455 |                                                   |
| 11 | 1592759 | 1593085 | KD2-H4K8ac_peak_4771 | 8.53092  | DUSP8_ENSG00000184545;KRTAP5-AS1_ENSG00000233930  |
| 11 | 1593728 | 1594124 | KD2-H4K8ac_peak_4772 | 13.1706  | DUSP8_ENSG00000184545                             |
| 11 | 1649807 | 1650132 | KD2-H4K8ac_peak_4773 | 6.66359  | KRTAP5-5_ENSG00000185940                          |
| 11 | 1659450 | 1659968 | KD2-H4K8ac_peak_4774 | 8.74596  |                                                   |
| 11 | 1660569 | 1660961 | KD2-H4K8ac_peak_4775 | 13.73635 |                                                   |
| 11 | 1661635 | 1662108 | KD2-H4K8ac_peak_4776 | 9.11031  |                                                   |
| 11 | 1674241 | 1674690 | KD2-H4K8ac_peak_4777 | 15.039   |                                                   |
| 11 | 1680837 | 1681215 | KD2-H4K8ac_peak_4778 | 6.79289  |                                                   |
| 11 | 1714713 | 1715595 | KD2-H4K8ac_peak_4779 | 26.58409 |                                                   |
| 11 | 1765441 | 1765802 | KD2-H4K8ac_peak_4780 | 8.26945  |                                                   |
| 11 | 1766143 | 1766381 | KD2-H4K8ac_peak_4781 | 5.75757  |                                                   |
| 11 | 1770018 | 1770286 | KD2-H4K8ac_peak_4782 | 6.9556   |                                                   |

|    |         |         |                      |          |                                                                            |
|----|---------|---------|----------------------|----------|----------------------------------------------------------------------------|
| 11 | 1784708 | 1785141 | KD2-H4K8ac_peak_4783 | 12.93209 | CTSD_ENSG00000117984;AC068580.5_ENSG00000229512;AC068580.1_ENSG00000265587 |
| 11 | 1785400 | 1785857 | KD2-H4K8ac_peak_4784 | 10.77651 | CTSD_ENSG00000117984;AC068580.5_ENSG00000229512;AC068580.1_ENSG00000265587 |
| 11 | 1847772 | 1848495 | KD2-H4K8ac_peak_4785 | 8.23274  | SYT8_ENSG00000149043                                                       |
| 11 | 1848770 | 1849059 | KD2-H4K8ac_peak_4786 | 8.4716   | SYT8_ENSG00000149043                                                       |
| 11 | 1853308 | 1853896 | KD2-H4K8ac_peak_4787 | 5.84991  |                                                                            |
| 11 | 1855397 | 1855932 | KD2-H4K8ac_peak_4788 | 9.03107  |                                                                            |
| 11 | 1858541 | 1859512 | KD2-H4K8ac_peak_4789 | 11.05467 | TNNI2_ENSG00000130598                                                      |
| 11 | 1884622 | 1885122 | KD2-H4K8ac_peak_4790 | 7.13615  | AC051649.12_ENSG00000249086                                                |
| 11 | 1885805 | 1886033 | KD2-H4K8ac_peak_4791 | 8.53092  | AC051649.12_ENSG00000249086                                                |
| 11 | 1886267 | 1886464 | KD2-H4K8ac_peak_4792 | 5.20998  | AC051649.12_ENSG00000249086                                                |
| 11 | 1895960 | 1896372 | KD2-H4K8ac_peak_4793 | 14.39799 |                                                                            |
| 11 | 1896753 | 1896969 | KD2-H4K8ac_peak_4794 | 6.66359  |                                                                            |
| 11 | 1897395 | 1898073 | KD2-H4K8ac_peak_4795 | 10.80014 |                                                                            |
| 11 | 1898357 | 1899543 | KD2-H4K8ac_peak_4796 | 15.40891 |                                                                            |
| 11 | 1903182 | 1904059 | KD2-H4K8ac_peak_4797 | 10.43145 |                                                                            |
| 11 | 1945882 | 1946249 | KD2-H4K8ac_peak_4798 | 4.01115  |                                                                            |
| 11 | 1960260 | 1960523 | KD2-H4K8ac_peak_4799 | 7.69287  |                                                                            |
| 11 | 1967642 | 1968197 | KD2-H4K8ac_peak_4800 | 14.80472 | MRPL23_ENSG00000214026                                                     |
| 11 | 1968596 | 1970114 | KD2-H4K8ac_peak_4801 | 29.13005 | MRPL23_ENSG00000214026                                                     |
| 11 | 1974179 | 1974580 | KD2-H4K8ac_peak_4802 | 9.40886  |                                                                            |
| 11 | 1974784 | 1975077 | KD2-H4K8ac_peak_4803 | 5.61067  |                                                                            |
| 11 | 1975339 | 1975592 | KD2-H4K8ac_peak_4804 | 10.73134 |                                                                            |
| 11 | 1975898 | 1976141 | KD2-H4K8ac_peak_4805 | 4.91674  |                                                                            |
| 11 | 1977211 | 1978235 | KD2-H4K8ac_peak_4806 | 15.05364 |                                                                            |
| 11 | 1978593 | 1978798 | KD2-H4K8ac_peak_4807 | 4.06758  |                                                                            |
| 11 | 1981354 | 1981844 | KD2-H4K8ac_peak_4808 | 6.48071  |                                                                            |
| 11 | 1982120 | 1982420 | KD2-H4K8ac_peak_4809 | 6.52841  |                                                                            |
| 11 | 1983771 | 1984181 | KD2-H4K8ac_peak_4810 | 8.14802  |                                                                            |
| 11 | 1986805 | 1987006 | KD2-H4K8ac_peak_4811 | 7.146    |                                                                            |
| 11 | 1988050 | 1988344 | KD2-H4K8ac_peak_4812 | 3.90565  |                                                                            |
| 11 | 1988620 | 1988959 | KD2-H4K8ac_peak_4813 | 10.21366 |                                                                            |
| 11 | 1989462 | 1991357 | KD2-H4K8ac_peak_4814 | 15.66774 |                                                                            |
| 11 | 1991815 | 1992904 | KD2-H4K8ac_peak_4815 | 14.40719 |                                                                            |
| 11 | 1997994 | 1998801 | KD2-H4K8ac_peak_4816 | 9.64735  |                                                                            |
| 11 | 1999031 | 2000108 | KD2-H4K8ac_peak_4817 | 24.60055 |                                                                            |
| 11 | 2000625 | 2004935 | KD2-H4K8ac_peak_4818 | 17.46525 |                                                                            |
| 11 | 2005131 | 2005579 | KD2-H4K8ac_peak_4819 | 5.50645  |                                                                            |
| 11 | 2006055 | 2006261 | KD2-H4K8ac_peak_4820 | 7.74292  |                                                                            |
| 11 | 2009309 | 2012679 | KD2-H4K8ac_peak_4821 | 17.83665 | MRPL23-AS1_ENSG00000226416;AC051649.6_ENSG00000232987                      |
| 11 | 2013962 | 2015301 | KD2-H4K8ac_peak_4822 | 10.65724 |                                                                            |
| 11 | 2015716 | 2016029 | KD2-H4K8ac_peak_4823 | 14.80079 |                                                                            |
| 11 | 2017244 | 2017548 | KD2-H4K8ac_peak_4824 | 5.13893  |                                                                            |
| 11 | 2018401 | 2018952 | KD2-H4K8ac_peak_4825 | 7.82935  |                                                                            |
| 11 | 2177531 | 2177756 | KD2-H4K8ac_peak_4826 | 10.65724 |                                                                            |
| 11 | 2189986 | 2191025 | KD2-H4K8ac_peak_4827 | 10.0692  |                                                                            |
| 11 | 2191299 | 2191826 | KD2-H4K8ac_peak_4828 | 8.17902  |                                                                            |

|    |         |         |                      |          |                          |
|----|---------|---------|----------------------|----------|--------------------------|
| 11 | 2195842 | 2196039 | KD2-H4K8ac_peak_4829 | 6.40683  |                          |
| 11 | 2207272 | 2207650 | KD2-H4K8ac_peak_4830 | 6.40297  |                          |
| 11 | 2211271 | 2212273 | KD2-H4K8ac_peak_4831 | 8.4716   |                          |
| 11 | 2212502 | 2212920 | KD2-H4K8ac_peak_4832 | 3.86308  |                          |
| 11 | 2213383 | 2214523 | KD2-H4K8ac_peak_4833 | 21.11201 |                          |
| 11 | 2214781 | 2214978 | KD2-H4K8ac_peak_4834 | 11.27376 |                          |
| 11 | 2215734 | 2215980 | KD2-H4K8ac_peak_4835 | 5.30799  |                          |
| 11 | 2326476 | 2326932 | KD2-H4K8ac_peak_4836 | 7.27716  |                          |
| 11 | 2335742 | 2336195 | KD2-H4K8ac_peak_4837 | 10.95611 |                          |
| 11 | 2336521 | 2337308 | KD2-H4K8ac_peak_4838 | 8.30974  |                          |
| 11 | 2420605 | 2421511 | KD2-H4K8ac_peak_4839 | 29.96261 | TSSC4_ENSG00000184281    |
| 11 | 2422047 | 2422241 | KD2-H4K8ac_peak_4840 | 8.85813  | TSSC4_ENSG00000184281    |
| 11 | 2429911 | 2430150 | KD2-H4K8ac_peak_4841 | 5.95537  |                          |
| 11 | 2481950 | 2482269 | KD2-H4K8ac_peak_4842 | 6.30626  |                          |
| 11 | 2482525 | 2482926 | KD2-H4K8ac_peak_4843 | 6.89708  |                          |
| 11 | 2483187 | 2483425 | KD2-H4K8ac_peak_4844 | 5.61067  |                          |
| 11 | 2603479 | 2603836 | KD2-H4K8ac_peak_4845 | 6.67081  |                          |
| 11 | 2604202 | 2604442 | KD2-H4K8ac_peak_4846 | 7.47462  |                          |
| 11 | 2695314 | 2695521 | KD2-H4K8ac_peak_4847 | 9.59814  |                          |
| 11 | 2721521 | 2722019 | KD2-H4K8ac_peak_4848 | 11.05467 | KCNQ1OT1_ENSG00000269821 |
| 11 | 2724199 | 2724672 | KD2-H4K8ac_peak_4849 | 6.66692  |                          |
| 11 | 2725043 | 2725323 | KD2-H4K8ac_peak_4850 | 5.45396  |                          |
| 11 | 2729548 | 2730104 | KD2-H4K8ac_peak_4851 | 15.22237 |                          |
| 11 | 2730698 | 2730911 | KD2-H4K8ac_peak_4852 | 5.77265  |                          |
| 11 | 2733858 | 2734069 | KD2-H4K8ac_peak_4853 | 7.47462  |                          |
| 11 | 2734692 | 2735961 | KD2-H4K8ac_peak_4854 | 15.01306 |                          |
| 11 | 2739102 | 2739634 | KD2-H4K8ac_peak_4855 | 8.08344  |                          |
| 11 | 2750291 | 2750508 | KD2-H4K8ac_peak_4856 | 6.0605   |                          |
| 11 | 2772361 | 2772654 | KD2-H4K8ac_peak_4857 | 3.68875  |                          |
| 11 | 2793041 | 2793365 | KD2-H4K8ac_peak_4858 | 6.15357  | COX6CP18_ENSG00000236041 |
| 11 | 2797459 | 2798256 | KD2-H4K8ac_peak_4859 | 14.80472 |                          |
| 11 | 2798718 | 2802226 | KD2-H4K8ac_peak_4860 | 22.59108 |                          |
| 11 | 2828580 | 2828802 | KD2-H4K8ac_peak_4861 | 6.66692  |                          |
| 11 | 2905190 | 2905861 | KD2-H4K8ac_peak_4862 | 6.0073   |                          |
| 11 | 2907479 | 2907930 | KD2-H4K8ac_peak_4863 | 8.83582  | CDKN1C_ENSG00000129757   |
| 11 | 2922884 | 2923139 | KD2-H4K8ac_peak_4864 | 12.36441 |                          |
| 11 | 2923581 | 2923779 | KD2-H4K8ac_peak_4865 | 6.66359  |                          |
| 11 | 3013004 | 3013207 | KD2-H4K8ac_peak_4866 | 8.36514  | NAP1L4_ENSG00000205531   |
| 11 | 3013856 | 3014277 | KD2-H4K8ac_peak_4867 | 8.86099  | NAP1L4_ENSG00000205531   |
| 11 | 3022364 | 3022908 | KD2-H4K8ac_peak_4868 | 5.92591  |                          |
| 11 | 3077934 | 3078600 | KD2-H4K8ac_peak_4869 | 16.40694 | CARS_ENSG00000110619     |
| 11 | 3078801 | 3079339 | KD2-H4K8ac_peak_4870 | 19.3524  | CARS_ENSG00000110619     |
| 11 | 3175255 | 3175449 | KD2-H4K8ac_peak_4871 | 4.8485   |                          |
| 11 | 3181243 | 3181554 | KD2-H4K8ac_peak_4872 | 5.88845  |                          |
| 11 | 3253261 | 3253759 | KD2-H4K8ac_peak_4873 | 7.76329  | MRGPRE_ENSG00000184350   |
| 11 | 3399852 | 3400342 | KD2-H4K8ac_peak_4874 | 8.58725  | ZNF195_ENSG00000005801   |

|    |         |         |                      |          |                                                                                                     |
|----|---------|---------|----------------------|----------|-----------------------------------------------------------------------------------------------------|
| 11 | 3443243 | 3443706 | KD2-H4K8ac_peak_4875 | 12.84642 | FAM86GP_ENSG00000166492                                                                             |
| 11 | 3464099 | 3464617 | KD2-H4K8ac_peak_4876 | 7.12754  |                                                                                                     |
| 11 | 3818490 | 3818704 | KD2-H4K8ac_peak_4877 | 5.72327  | NUP98_ENSG00000110713;PGAP2_ENSG00000148985                                                         |
| 11 | 3819294 | 3819770 | KD2-H4K8ac_peak_4878 | 6.84261  | NUP98_ENSG00000110713;PGAP2_ENSG00000148985                                                         |
| 11 | 3828980 | 3829327 | KD2-H4K8ac_peak_4879 | 5.20908  |                                                                                                     |
| 11 | 3829860 | 3830221 | KD2-H4K8ac_peak_4880 | 8.51832  |                                                                                                     |
| 11 | 3862413 | 3862849 | KD2-H4K8ac_peak_4881 | 14.00658 | RHOG_ENSG00000177105                                                                                |
| 11 | 3876518 | 3876717 | KD2-H4K8ac_peak_4882 | 6.66692  | AC090587.5_ENSG00000228661;STIM1_ENSG00000167323;AC090587.4_ENSG00000229368;MIR4687_ENSG00000263421 |
| 11 | 3876914 | 3877115 | KD2-H4K8ac_peak_4883 | 8.6308   | AC090587.5_ENSG00000228661;MIR4687_ENSG00000263421                                                  |
| 11 | 4115307 | 4115824 | KD2-H4K8ac_peak_4884 | 8.34752  | RRM1_ENSG00000167325                                                                                |
| 11 | 4208385 | 4208829 | KD2-H4K8ac_peak_4885 | 14.15075 | RP11-23F23.2_ENSG00000254480                                                                        |
| 11 | 4414459 | 4414901 | KD2-H4K8ac_peak_4886 | 9.95119  | TRIM21_ENSG00000132109                                                                              |
| 11 | 4629061 | 4629262 | KD2-H4K8ac_peak_4887 | 9.34989  | TRIM68_ENSG00000167333                                                                              |
| 11 | 6439930 | 6440921 | KD2-H4K8ac_peak_4888 | 9.95759  | APBB1_ENSG00000166313                                                                               |
| 11 | 6502842 | 6503175 | KD2-H4K8ac_peak_4889 | 5.80191  | ARFIP2_ENSG00000132254;TIMM10B_ENSG00000132286;TIMM10B_ENSG00000265264                              |
| 11 | 6607735 | 6608733 | KD2-H4K8ac_peak_4890 | 15.32867 |                                                                                                     |
| 11 | 6625038 | 6625394 | KD2-H4K8ac_peak_4891 | 11.86082 | RRP8_ENSG00000132275;RP11-732A19.8_ENSG00000254400;ILK_ENSG00000166333                              |
| 11 | 6632902 | 6633382 | KD2-H4K8ac_peak_4892 | 7.90806  | TAF10_ENSG00000166337                                                                               |
| 11 | 6633627 | 6634059 | KD2-H4K8ac_peak_4893 | 9.63487  | TAF10_ENSG00000166337                                                                               |
| 11 | 6667390 | 6667785 | KD2-H4K8ac_peak_4894 | 7.18916  |                                                                                                     |
| 11 | 6668218 | 6668698 | KD2-H4K8ac_peak_4895 | 8.10216  |                                                                                                     |
| 11 | 6669057 | 6669249 | KD2-H4K8ac_peak_4896 | 4.77079  |                                                                                                     |
| 11 | 6676089 | 6676953 | KD2-H4K8ac_peak_4897 | 9.73431  | DCHS1_ENSG00000166341                                                                               |
| 11 | 6677227 | 6677511 | KD2-H4K8ac_peak_4898 | 9.1707   | DCHS1_ENSG00000166341                                                                               |
| 11 | 6704098 | 6704568 | KD2-H4K8ac_peak_4899 | 13.57066 | MRPL17_ENSG00000158042                                                                              |
| 11 | 6705361 | 6705728 | KD2-H4K8ac_peak_4900 | 5.20908  | MRPL17_ENSG00000158042                                                                              |
| 11 | 7041108 | 7041354 | KD2-H4K8ac_peak_4901 | 7.13615  | ZNF214_ENSG00000149050;NLRP14_ENSG00000158077                                                       |
| 11 | 7041760 | 7042159 | KD2-H4K8ac_peak_4902 | 9.95119  | ZNF214_ENSG00000149050;NLRP14_ENSG00000158077                                                       |
| 11 | 7174145 | 7174359 | KD2-H4K8ac_peak_4903 | 12.42547 |                                                                                                     |
| 11 | 7597001 | 7597373 | KD2-H4K8ac_peak_4904 | 8.30974  |                                                                                                     |
| 11 | 7597686 | 7599188 | KD2-H4K8ac_peak_4905 | 8.85813  |                                                                                                     |
| 11 | 8040174 | 8040871 | KD2-H4K8ac_peak_4906 | 10.46264 | TUB_ENSG00000166402                                                                                 |
| 11 | 8054386 | 8054820 | KD2-H4K8ac_peak_4907 | 10.43145 |                                                                                                     |
| 11 | 8078050 | 8078681 | KD2-H4K8ac_peak_4908 | 7.47462  |                                                                                                     |
| 11 | 8080622 | 8081035 | KD2-H4K8ac_peak_4909 | 5.57044  | RP11-236J17.5_ENSG00000248332                                                                       |
| 11 | 8087565 | 8089273 | KD2-H4K8ac_peak_4910 | 6.40297  |                                                                                                     |
| 11 | 8089725 | 8090550 | KD2-H4K8ac_peak_4911 | 15.61313 |                                                                                                     |
| 11 | 8091340 | 8091655 | KD2-H4K8ac_peak_4912 | 6.40297  |                                                                                                     |
| 11 | 8102173 | 8102583 | KD2-H4K8ac_peak_4913 | 14.12454 |                                                                                                     |
| 11 | 8102866 | 8103488 | KD2-H4K8ac_peak_4914 | 8.02571  |                                                                                                     |
| 11 | 8103784 | 8103990 | KD2-H4K8ac_peak_4915 | 8.23796  |                                                                                                     |
| 11 | 8104503 | 8104738 | KD2-H4K8ac_peak_4916 | 7.76104  |                                                                                                     |
| 11 | 8107046 | 8107272 | KD2-H4K8ac_peak_4917 | 6.24114  |                                                                                                     |
| 11 | 8190464 | 8190710 | KD2-H4K8ac_peak_4918 | 9.41619  | RIC3_ENSG00000166405;RP11-379P15.1_ENSG00000246820                                                  |
| 11 | 8227204 | 8227803 | KD2-H4K8ac_peak_4919 | 3.90565  |                                                                                                     |
| 11 | 8228579 | 8229284 | KD2-H4K8ac_peak_4920 | 12.84642 |                                                                                                     |

|    |          |          |                      |          |                                                        |
|----|----------|----------|----------------------|----------|--------------------------------------------------------|
| 11 | 8249739  | 8250804  | KD2-H4K8ac_peak_4921 | 8.82366  |                                                        |
| 11 | 8251409  | 8253702  | KD2-H4K8ac_peak_4922 | 17.60835 |                                                        |
| 11 | 8253961  | 8255290  | KD2-H4K8ac_peak_4923 | 21.01814 |                                                        |
| 11 | 8255987  | 8256730  | KD2-H4K8ac_peak_4924 | 12.14337 |                                                        |
| 11 | 8258008  | 8258208  | KD2-H4K8ac_peak_4925 | 6.13909  |                                                        |
| 11 | 8260830  | 8261444  | KD2-H4K8ac_peak_4926 | 9.1707   |                                                        |
| 11 | 8263513  | 8264353  | KD2-H4K8ac_peak_4927 | 6.98244  |                                                        |
| 11 | 8264596  | 8265446  | KD2-H4K8ac_peak_4928 | 16.67374 |                                                        |
| 11 | 8266124  | 8266500  | KD2-H4K8ac_peak_4929 | 7.37678  |                                                        |
| 11 | 8283811  | 8285075  | KD2-H4K8ac_peak_4930 | 16.57619 |                                                        |
| 11 | 8289405  | 8289600  | KD2-H4K8ac_peak_4931 | 6.62457  | LMO1_ENSG00000166407                                   |
| 11 | 8289846  | 8290287  | KD2-H4K8ac_peak_4932 | 8.88082  | LMO1_ENSG00000166407                                   |
| 11 | 8304008  | 8304581  | KD2-H4K8ac_peak_4933 | 4.211    |                                                        |
| 11 | 8305321  | 8305820  | KD2-H4K8ac_peak_4934 | 25.8903  |                                                        |
| 11 | 8311184  | 8311399  | KD2-H4K8ac_peak_4935 | 6.99815  |                                                        |
| 11 | 8350601  | 8351158  | KD2-H4K8ac_peak_4936 | 9.95119  |                                                        |
| 11 | 8357513  | 8357855  | KD2-H4K8ac_peak_4937 | 8.79106  |                                                        |
| 11 | 8358278  | 8358580  | KD2-H4K8ac_peak_4938 | 6.99815  |                                                        |
| 11 | 8365049  | 8365253  | KD2-H4K8ac_peak_4939 | 4.37815  |                                                        |
| 11 | 8376296  | 8377046  | KD2-H4K8ac_peak_4940 | 18.29344 |                                                        |
| 11 | 8615642  | 8616083  | KD2-H4K8ac_peak_4941 | 10.20046 | STK33_ENSG00000130413                                  |
| 11 | 8692946  | 8693231  | KD2-H4K8ac_peak_4942 | 4.42765  | TRIM66_ENSG00000166436                                 |
| 11 | 8703883  | 8704139  | KD2-H4K8ac_peak_4943 | 11.28831 | RPL27A_ENSG00000166441                                 |
| 11 | 8704384  | 8704929  | KD2-H4K8ac_peak_4944 | 12.10889 | RPL27A_ENSG00000166441;SNORA3_ENSG00000200983          |
| 11 | 8854232  | 8854507  | KD2-H4K8ac_peak_4945 | 10.0746  |                                                        |
| 11 | 8892235  | 8892710  | KD2-H4K8ac_peak_4946 | 8.85813  |                                                        |
| 11 | 8932836  | 8933159  | KD2-H4K8ac_peak_4947 | 9.20193  | ST5_ENSG00000166444;AKIP1_ENSG00000166452              |
| 11 | 8985662  | 8986668  | KD2-H4K8ac_peak_4948 | 11.28831 | TMEM9B_ENSG00000175348;TMEM9B-AS1_ENSG00000254860      |
| 11 | 9088066  | 9088318  | KD2-H4K8ac_peak_4949 | 5.08628  |                                                        |
| 11 | 9112593  | 9112847  | KD2-H4K8ac_peak_4950 | 5.88562  | MIR5691_ENSG00000264984                                |
| 11 | 9286296  | 9286824  | KD2-H4K8ac_peak_4951 | 6.83936  | DENND5A_ENSG00000184014                                |
| 11 | 9287228  | 9287451  | KD2-H4K8ac_peak_4952 | 4.44527  | DENND5A_ENSG00000184014                                |
| 11 | 9335818  | 9336082  | KD2-H4K8ac_peak_4953 | 7.07117  | TMEM41B_ENSG00000166471                                |
| 11 | 9336546  | 9337136  | KD2-H4K8ac_peak_4954 | 13.81781 | TMEM41B_ENSG00000166471                                |
| 11 | 9385047  | 9385256  | KD2-H4K8ac_peak_4955 | 6.36319  |                                                        |
| 11 | 9385528  | 9386298  | KD2-H4K8ac_peak_4956 | 13.3695  |                                                        |
| 11 | 9405521  | 9405852  | KD2-H4K8ac_peak_4957 | 10.29344 | IPO7_ENSG00000205339                                   |
| 11 | 9406281  | 9406829  | KD2-H4K8ac_peak_4958 | 19.55721 | IPO7_ENSG00000205339                                   |
| 11 | 9481770  | 9482127  | KD2-H4K8ac_peak_4959 | 7.73264  | AC132192.1_ENSG00000268403;ZNF143_ENSG00000166478      |
| 11 | 9482706  | 9483187  | KD2-H4K8ac_peak_4960 | 23.33626 | AC132192.1_ENSG00000268403;ZNF143_ENSG00000166478      |
| 11 | 9573558  | 9573827  | KD2-H4K8ac_peak_4961 | 13.09607 |                                                        |
| 11 | 9595449  | 9595864  | KD2-H4K8ac_peak_4962 | 6.99194  | WEE1_ENSG00000166483                                   |
| 11 | 9685005  | 9685511  | KD2-H4K8ac_peak_4963 | 9.11031  | SWAP70_ENSG00000133789                                 |
| 11 | 9779448  | 9780450  | KD2-H4K8ac_peak_4964 | 17.43561 | SBF2-AS1_ENSG00000246273;RP11-540A21.2_ENSG00000245522 |
| 11 | 9780662  | 9780990  | KD2-H4K8ac_peak_4965 | 13.75159 | SBF2-AS1_ENSG00000246273;RP11-540A21.2_ENSG00000245522 |
| 11 | 10315207 | 10316490 | KD2-H4K8ac_peak_4966 | 16.64426 | SBF2_ENSG00000133812                                   |



|    |          |          |                      |          |                                                     |
|----|----------|----------|----------------------|----------|-----------------------------------------------------|
| 11 | 10342138 | 10342340 | KD2-H4K8ac_peak_4967 | 4.42765  |                                                     |
| 11 | 10429265 | 10429809 | KD2-H4K8ac_peak_4968 | 6.78668  |                                                     |
| 11 | 10476744 | 10478097 | KD2-H4K8ac_peak_4969 | 9.36516  |                                                     |
| 11 | 10562319 | 10562686 | KD2-H4K8ac_peak_4970 | 9.07715  | RNF141_ENSG00000110315;MRVII-AS1_ENSG00000177112    |
| 11 | 10562932 | 10563125 | KD2-H4K8ac_peak_4971 | 7.92775  | RNF141_ENSG00000110315;MRVII-AS1_ENSG00000177112    |
| 11 | 10715269 | 10715582 | KD2-H4K8ac_peak_4972 | 9.65086  | MRVII_ENSG00000072952                               |
| 11 | 10750691 | 10750910 | KD2-H4K8ac_peak_4973 | 12.09025 |                                                     |
| 11 | 10757057 | 10757304 | KD2-H4K8ac_peak_4974 | 7.18916  |                                                     |
| 11 | 10763086 | 10763330 | KD2-H4K8ac_peak_4975 | 7.13615  |                                                     |
| 11 | 10764025 | 10764291 | KD2-H4K8ac_peak_4976 | 4.42765  |                                                     |
| 11 | 10772002 | 10772247 | KD2-H4K8ac_peak_4977 | 7.11925  | CTR9_ENSG00000198730                                |
| 11 | 10772476 | 10773227 | KD2-H4K8ac_peak_4978 | 8.16906  | CTR9_ENSG00000198730                                |
| 11 | 10790578 | 10790800 | KD2-H4K8ac_peak_4979 | 6.16888  |                                                     |
| 11 | 10800420 | 10800647 | KD2-H4K8ac_peak_4980 | 6.24747  |                                                     |
| 11 | 10806129 | 10806590 | KD2-H4K8ac_peak_4981 | 7.36933  |                                                     |
| 11 | 10829609 | 10830100 | KD2-H4K8ac_peak_4982 | 15.25814 | RP11-685M7.3_ENSG00000246308;EIF4G2_ENSG00000110321 |
| 11 | 10878996 | 10879525 | KD2-H4K8ac_peak_4983 | 9.18237  | ZBED5_ENSG00000236287;ZBED5-AS1_ENSG00000247271     |
| 11 | 10879986 | 10880592 | KD2-H4K8ac_peak_4984 | 10.30284 | ZBED5_ENSG00000236287;ZBED5-AS1_ENSG00000247271     |
| 11 | 10952284 | 10952519 | KD2-H4K8ac_peak_4985 | 7.98621  |                                                     |
| 11 | 10952850 | 10953513 | KD2-H4K8ac_peak_4986 | 7.74292  |                                                     |
| 11 | 11643869 | 11644072 | KD2-H4K8ac_peak_4987 | 6.99815  | GALNT18_ENSG00000110328                             |
| 11 | 11862948 | 11864112 | KD2-H4K8ac_peak_4988 | 15.58442 | USP47_ENSG00000170242                               |
| 11 | 11985923 | 11986122 | KD2-H4K8ac_peak_4989 | 6.25869  |                                                     |
| 11 | 11989505 | 11990240 | KD2-H4K8ac_peak_4990 | 12.00597 |                                                     |
| 11 | 11990598 | 11991640 | KD2-H4K8ac_peak_4991 | 11.24702 |                                                     |
| 11 | 11998109 | 11998462 | KD2-H4K8ac_peak_4992 | 3.90565  |                                                     |
| 11 | 12000297 | 12000709 | KD2-H4K8ac_peak_4993 | 12.25498 |                                                     |
| 11 | 12001563 | 12002260 | KD2-H4K8ac_peak_4994 | 10.87093 |                                                     |
| 11 | 12002623 | 12002873 | KD2-H4K8ac_peak_4995 | 6.99815  |                                                     |
| 11 | 12003544 | 12003956 | KD2-H4K8ac_peak_4996 | 4.68541  |                                                     |
| 11 | 12030407 | 12030860 | KD2-H4K8ac_peak_4997 | 10.86378 | DKK3_ENSG00000050165                                |
| 11 | 12310539 | 12310783 | KD2-H4K8ac_peak_4998 | 7.27716  |                                                     |
| 11 | 12341242 | 12341493 | KD2-H4K8ac_peak_4999 | 15.34166 |                                                     |
| 11 | 12352556 | 12352784 | KD2-H4K8ac_peak_5000 | 8.1233   |                                                     |
| 11 | 12378156 | 12378387 | KD2-H4K8ac_peak_5001 | 5.04237  |                                                     |
| 11 | 12399150 | 12399868 | KD2-H4K8ac_peak_5002 | 13.4748  | PARVA_ENSG00000197702                               |
| 11 | 12455744 | 12456362 | KD2-H4K8ac_peak_5003 | 7.1181   |                                                     |
| 11 | 12695388 | 12695663 | KD2-H4K8ac_peak_5004 | 13.70753 | TEAD1_ENSG00000187079                               |
| 11 | 12696602 | 12696951 | KD2-H4K8ac_peak_5005 | 10.17698 | TEAD1_ENSG00000187079                               |
| 11 | 12824038 | 12824352 | KD2-H4K8ac_peak_5006 | 5.14125  |                                                     |
| 11 | 12835680 | 12836176 | KD2-H4K8ac_peak_5007 | 7.76329  |                                                     |
| 11 | 12838455 | 12838700 | KD2-H4K8ac_peak_5008 | 6.66692  |                                                     |
| 11 | 12866630 | 12866846 | KD2-H4K8ac_peak_5009 | 6.99815  |                                                     |
| 11 | 12903487 | 12903779 | KD2-H4K8ac_peak_5010 | 7.26089  |                                                     |
| 11 | 13351060 | 13351383 | KD2-H4K8ac_peak_5011 | 5.54647  |                                                     |
| 11 | 13353022 | 13353362 | KD2-H4K8ac_peak_5012 | 5.45396  |                                                     |

|    |          |          |                      |          |                                                 |
|----|----------|----------|----------------------|----------|-------------------------------------------------|
| 11 | 13484357 | 13484693 | KD2-H4K8ac_peak_5013 | 8.10216  | BTBD10_ENSG00000148925                          |
| 11 | 13484973 | 13485631 | KD2-H4K8ac_peak_5014 | 7.59643  | BTBD10_ENSG00000148925                          |
| 11 | 13689401 | 13689800 | KD2-H4K8ac_peak_5015 | 15.22643 | FAR1_ENSG00000197601                            |
| 11 | 13690321 | 13690731 | KD2-H4K8ac_peak_5016 | 5.66705  | FAR1_ENSG00000197601;FAR1-IT1_ENSG00000254791   |
| 11 | 14223658 | 14223953 | KD2-H4K8ac_peak_5017 | 4.42765  |                                                 |
| 11 | 14380062 | 14380645 | KD2-H4K8ac_peak_5018 | 11.05407 |                                                 |
| 11 | 14402700 | 14403192 | KD2-H4K8ac_peak_5019 | 4.91674  |                                                 |
| 11 | 14520984 | 14521299 | KD2-H4K8ac_peak_5020 | 4.42765  | COPB1_ENSG00000129083                           |
| 11 | 14541635 | 14541876 | KD2-H4K8ac_peak_5021 | 15.59774 | PSMA1_ENSG00000256206                           |
| 11 | 14664901 | 14665111 | KD2-H4K8ac_peak_5022 | 8.62078  | PSMA1_ENSG00000129084;PDE3B_ENSG00000152270     |
| 11 | 14665479 | 14665904 | KD2-H4K8ac_peak_5023 | 7.28827  | PSMA1_ENSG00000129084;PDE3B_ENSG00000152270     |
| 11 | 14913368 | 14913738 | KD2-H4K8ac_peak_5024 | 14.63458 | CYP2R1_ENSG00000186104                          |
| 11 | 15637391 | 15637589 | KD2-H4K8ac_peak_5025 | 7.05051  |                                                 |
| 11 | 15642573 | 15642944 | KD2-H4K8ac_peak_5026 | 7.76329  | RP11-531H8.2_ENSG00000254789                    |
| 11 | 15644438 | 15644789 | KD2-H4K8ac_peak_5027 | 5.557    | RP11-531H8.2_ENSG00000254789                    |
| 11 | 15671909 | 15672302 | KD2-H4K8ac_peak_5028 | 6.30229  |                                                 |
| 11 | 15771316 | 15771514 | KD2-H4K8ac_peak_5029 | 6.16888  |                                                 |
| 11 | 15866727 | 15867055 | KD2-H4K8ac_peak_5030 | 4.77079  |                                                 |
| 11 | 16628548 | 16628751 | KD2-H4K8ac_peak_5031 | 5.14125  |                                                 |
| 11 | 16758739 | 16758983 | KD2-H4K8ac_peak_5032 | 5.25071  |                                                 |
| 11 | 17035270 | 17035809 | KD2-H4K8ac_peak_5033 | 7.20567  | PLEKHA7_ENSG00000166689;OR7E14P_ENSG00000184669 |
| 11 | 17036089 | 17036386 | KD2-H4K8ac_peak_5034 | 5.14125  | PLEKHA7_ENSG00000166689;OR7E14P_ENSG00000184669 |
| 11 | 17098826 | 17099055 | KD2-H4K8ac_peak_5035 | 9.06369  | RPS13_ENSG00000110700                           |
| 11 | 17100151 | 17100388 | KD2-H4K8ac_peak_5036 | 4.67342  | RPS13_ENSG00000110700                           |
| 11 | 17229201 | 17229457 | KD2-H4K8ac_peak_5037 | 13.13965 | PIK3C2A_ENSG0000011405;NUCB2_ENSG00000070081    |
| 11 | 17229693 | 17230159 | KD2-H4K8ac_peak_5038 | 8.55271  | PIK3C2A_ENSG0000011405;NUCB2_ENSG00000070081    |
| 11 | 17297684 | 17298075 | KD2-H4K8ac_peak_5039 | 8.36432  |                                                 |
| 11 | 17298333 | 17298676 | KD2-H4K8ac_peak_5040 | 9.6247   |                                                 |
| 11 | 17373762 | 17374044 | KD2-H4K8ac_peak_5041 | 5.77029  | NCR3LG1_ENSG00000188211                         |
| 11 | 17411529 | 17411812 | KD2-H4K8ac_peak_5042 | 6.66692  | KCNJ11_ENSG00000187486                          |
| 11 | 17436969 | 17437228 | KD2-H4K8ac_peak_5043 | 7.59643  |                                                 |
| 11 | 17497703 | 17498013 | KD2-H4K8ac_peak_5044 | 6.76298  | ABCC8_ENSG0000006071                            |
| 11 | 18034958 | 18035222 | KD2-H4K8ac_peak_5045 | 6.60094  | SERGEF_ENSG00000129158                          |
| 11 | 18127254 | 18127560 | KD2-H4K8ac_peak_5046 | 13.95627 | SAAL1_ENSG00000166788;HIGD1AP5_ENSG00000255254  |
| 11 | 18404865 | 18406378 | KD2-H4K8ac_peak_5047 | 9.36516  |                                                 |
| 11 | 18415104 | 18416711 | KD2-H4K8ac_peak_5048 | 9.402    | LDHA_ENSG00000134333                            |
| 11 | 18548006 | 18548376 | KD2-H4K8ac_peak_5049 | 10.77651 | TSG101_ENSG00000074319                          |
| 11 | 18609901 | 18610474 | KD2-H4K8ac_peak_5050 | 10.87093 | UEVLD_ENSG00000151116                           |
| 11 | 18655428 | 18655622 | KD2-H4K8ac_peak_5051 | 6.0073   | SPTY2D1_ENSG00000179119                         |
| 11 | 18656218 | 18656567 | KD2-H4K8ac_peak_5052 | 6.56211  | SPTY2D1_ENSG00000179119                         |
| 11 | 18727400 | 18728617 | KD2-H4K8ac_peak_5053 | 11.60333 | RP11-1081L13.4_ENSG00000254966                  |
| 11 | 18743349 | 18743707 | KD2-H4K8ac_peak_5054 | 6.90231  |                                                 |
| 11 | 19137886 | 19138157 | KD2-H4K8ac_peak_5055 | 7.59643  | ZDHHC13_ENSG00000177054                         |
| 11 | 19138393 | 19139031 | KD2-H4K8ac_peak_5056 | 20.46575 | ZDHHC13_ENSG00000177054                         |
| 11 | 19262840 | 19263158 | KD2-H4K8ac_peak_5057 | 12.57143 | E2F8_ENSG00000129173                            |
| 11 | 19464017 | 19464217 | KD2-H4K8ac_peak_5058 | 6.0073   |                                                 |

|    |          |          |                      |          |                                                                       |
|----|----------|----------|----------------------|----------|-----------------------------------------------------------------------|
| 11 | 19581760 | 19581964 | KD2-H4K8ac_peak_5059 | 5.32933  |                                                                       |
| 11 | 19586155 | 19586362 | KD2-H4K8ac_peak_5060 | 7.73264  |                                                                       |
| 11 | 19595281 | 19595476 | KD2-H4K8ac_peak_5061 | 5.88845  |                                                                       |
| 11 | 19598446 | 19599162 | KD2-H4K8ac_peak_5062 | 8.21084  |                                                                       |
| 11 | 19617703 | 19618044 | KD2-H4K8ac_peak_5063 | 11.28831 |                                                                       |
| 11 | 19619362 | 19619910 | KD2-H4K8ac_peak_5064 | 26.15943 |                                                                       |
| 11 | 19733621 | 19734141 | KD2-H4K8ac_peak_5065 | 9.1707   | RP11-359E10.1_ENSG00000270607                                         |
| 11 | 19734880 | 19735307 | KD2-H4K8ac_peak_5066 | 6.25869  | RP11-359E10.1_ENSG00000270607                                         |
| 11 | 19735798 | 19736009 | KD2-H4K8ac_peak_5067 | 4.42765  |                                                                       |
| 11 | 19738585 | 19738862 | KD2-H4K8ac_peak_5068 | 5.30799  |                                                                       |
| 11 | 19744336 | 19744742 | KD2-H4K8ac_peak_5069 | 5.75757  |                                                                       |
| 11 | 19745999 | 19746195 | KD2-H4K8ac_peak_5070 | 5.9696   |                                                                       |
| 11 | 19746754 | 19747014 | KD2-H4K8ac_peak_5071 | 6.11333  |                                                                       |
| 11 | 19760172 | 19761356 | KD2-H4K8ac_peak_5072 | 10.87093 |                                                                       |
| 11 | 19813761 | 19814015 | KD2-H4K8ac_peak_5073 | 10.87093 |                                                                       |
| 11 | 19948811 | 19949143 | KD2-H4K8ac_peak_5074 | 4.86824  |                                                                       |
| 11 | 19953324 | 19953664 | KD2-H4K8ac_peak_5075 | 5.3778   |                                                                       |
| 11 | 20285706 | 20285936 | KD2-H4K8ac_peak_5076 | 6.16888  |                                                                       |
| 11 | 20408766 | 20408970 | KD2-H4K8ac_peak_5077 | 11.24702 | PRMT3_ENSG00000185238                                                 |
| 11 | 20409294 | 20409845 | KD2-H4K8ac_peak_5078 | 11.04256 | PRMT3_ENSG00000185238                                                 |
| 11 | 20412850 | 20413072 | KD2-H4K8ac_peak_5079 | 8.94469  |                                                                       |
| 11 | 20441440 | 20441716 | KD2-H4K8ac_peak_5080 | 7.27716  |                                                                       |
| 11 | 20474391 | 20474731 | KD2-H4K8ac_peak_5081 | 5.14125  |                                                                       |
| 11 | 20478432 | 20478699 | KD2-H4K8ac_peak_5082 | 5.73839  |                                                                       |
| 11 | 20482574 | 20482799 | KD2-H4K8ac_peak_5083 | 5.25071  |                                                                       |
| 11 | 20533914 | 20534108 | KD2-H4K8ac_peak_5084 | 7.47462  |                                                                       |
| 11 | 20566403 | 20566613 | KD2-H4K8ac_peak_5085 | 5.10276  |                                                                       |
| 11 | 20616495 | 20616718 | KD2-H4K8ac_peak_5086 | 6.0073   |                                                                       |
| 11 | 20617668 | 20618008 | KD2-H4K8ac_peak_5087 | 6.85193  |                                                                       |
| 11 | 20631062 | 20631594 | KD2-H4K8ac_peak_5088 | 9.1707   |                                                                       |
| 11 | 20691585 | 20691819 | KD2-H4K8ac_peak_5089 | 7.67504  | NELL1_ENSG00000165973                                                 |
| 11 | 22213954 | 22214761 | KD2-H4K8ac_peak_5090 | 10.05606 | ANO5_ENSG00000171714                                                  |
| 11 | 22646377 | 22647368 | KD2-H4K8ac_peak_5091 | 12.88108 | FANCF_ENSG00000183161;AC103801.2_ENSG00000229387;GAS2_ENSG00000148935 |
| 11 | 22687828 | 22688055 | KD2-H4K8ac_peak_5092 | 7.27716  |                                                                       |
| 11 | 22688256 | 22688539 | KD2-H4K8ac_peak_5093 | 13.39763 |                                                                       |
| 11 | 24518345 | 24518605 | KD2-H4K8ac_peak_5094 | 5.88845  | LUZP2_ENSG00000187398                                                 |
| 11 | 26848961 | 26849160 | KD2-H4K8ac_peak_5095 | 4.37708  |                                                                       |
| 11 | 26927138 | 26927331 | KD2-H4K8ac_peak_5096 | 5.25071  |                                                                       |
| 11 | 26974231 | 26975085 | KD2-H4K8ac_peak_5097 | 13.68542 |                                                                       |
| 11 | 27034354 | 27034657 | KD2-H4K8ac_peak_5098 | 4.37708  |                                                                       |
| 11 | 27528055 | 27528286 | KD2-H4K8ac_peak_5099 | 22.28045 | LIN7C_ENSG00000148943;BDNF-AS_ENSG00000245573                         |
| 11 | 27528489 | 27528822 | KD2-H4K8ac_peak_5100 | 7.13615  | LIN7C_ENSG00000148943;BDNF-AS_ENSG00000245573                         |
| 11 | 27740514 | 27740899 | KD2-H4K8ac_peak_5101 | 10.17486 |                                                                       |
| 11 | 28131865 | 28132114 | KD2-H4K8ac_peak_5102 | 12.57143 |                                                                       |
| 11 | 30343774 | 30344369 | KD2-H4K8ac_peak_5103 | 7.12754  | ARL14EP_ENSG00000152219                                               |
| 11 | 30344736 | 30345022 | KD2-H4K8ac_peak_5104 | 13.21293 | ARL14EP_ENSG00000152219                                               |

|    |          |          |                      |          |                                                     |
|----|----------|----------|----------------------|----------|-----------------------------------------------------|
| 11 | 30448021 | 30448241 | KD2-H4K8ac_peak_5105 | 7.08474  | RP4-710M3.2_ENSG00000255480                         |
| 11 | 30606745 | 30607163 | KD2-H4K8ac_peak_5106 | 8.30974  |                                                     |
| 11 | 30607520 | 30608091 | KD2-H4K8ac_peak_5107 | 12.00273 | MPPED2_ENSG00000066382                              |
| 11 | 30882450 | 30883082 | KD2-H4K8ac_peak_5108 | 8.1233   |                                                     |
| 11 | 30891668 | 30891867 | KD2-H4K8ac_peak_5109 | 6.68439  |                                                     |
| 11 | 32112075 | 32112290 | KD2-H4K8ac_peak_5110 | 4.0528   |                                                     |
| 11 | 32112542 | 32113808 | KD2-H4K8ac_peak_5111 | 6.25869  |                                                     |
| 11 | 32604638 | 32605133 | KD2-H4K8ac_peak_5112 | 12.88108 | EIF3M_ENSG00000149100                               |
| 11 | 32605818 | 32606045 | KD2-H4K8ac_peak_5113 | 6.0073   | EIF3M_ENSG00000149100                               |
| 11 | 32913677 | 32914499 | KD2-H4K8ac_peak_5114 | 6.0605   | QSER1_ENSG00000060749                               |
| 11 | 32914801 | 32915418 | KD2-H4K8ac_peak_5115 | 10.05606 | QSER1_ENSG00000060749                               |
| 11 | 33036970 | 33037303 | KD2-H4K8ac_peak_5116 | 11.66477 | DEPDC7_ENSG00000121690                              |
| 11 | 33037619 | 33037816 | KD2-H4K8ac_peak_5117 | 7.40314  | DEPDC7_ENSG00000121690                              |
| 11 | 33060214 | 33061894 | KD2-H4K8ac_peak_5118 | 14.68449 | TCP11L1_ENSG00000176148                             |
| 11 | 33182615 | 33182957 | KD2-H4K8ac_peak_5119 | 17.43705 | CSTF3_ENSG00000176102;CSTF3-AS1_ENSG00000247151     |
| 11 | 33277562 | 33277755 | KD2-H4K8ac_peak_5120 | 6.54442  | HIPK3_ENSG00000110422                               |
| 11 | 33278390 | 33278674 | KD2-H4K8ac_peak_5121 | 8.4939   | HIPK3_ENSG00000110422                               |
| 11 | 33278986 | 33279685 | KD2-H4K8ac_peak_5122 | 17.19888 | HIPK3_ENSG00000110422                               |
| 11 | 33397231 | 33398352 | KD2-H4K8ac_peak_5123 | 6.25869  |                                                     |
| 11 | 33713435 | 33713647 | KD2-H4K8ac_peak_5124 | 7.01964  |                                                     |
| 11 | 33757616 | 33757923 | KD2-H4K8ac_peak_5125 | 5.14125  | CD59_ENSG00000085063                                |
| 11 | 33758176 | 33758510 | KD2-H4K8ac_peak_5126 | 3.75035  | CD59_ENSG00000085063                                |
| 11 | 33796376 | 33796593 | KD2-H4K8ac_peak_5127 | 5.59859  | FBXO3_ENSG00000110429;RP11-646J21.5_ENSG00000254508 |
| 11 | 33800099 | 33800322 | KD2-H4K8ac_peak_5128 | 9.47671  |                                                     |
| 11 | 33850448 | 33850884 | KD2-H4K8ac_peak_5129 | 7.40111  |                                                     |
| 11 | 34073029 | 34073476 | KD2-H4K8ac_peak_5130 | 8.70727  | CAPRIN1_ENSG00000135387                             |
| 11 | 34074441 | 34075083 | KD2-H4K8ac_peak_5131 | 10.96455 |                                                     |
| 11 | 34127248 | 34127553 | KD2-H4K8ac_peak_5132 | 6.24114  | NAT10_ENSG00000135372                               |
| 11 | 34180301 | 34180545 | KD2-H4K8ac_peak_5133 | 5.80374  |                                                     |
| 11 | 34181553 | 34181890 | KD2-H4K8ac_peak_5134 | 13.73574 |                                                     |
| 11 | 34182402 | 34182665 | KD2-H4K8ac_peak_5135 | 11.89502 |                                                     |
| 11 | 34206144 | 34206393 | KD2-H4K8ac_peak_5136 | 4.9025   |                                                     |
| 11 | 34336783 | 34337203 | KD2-H4K8ac_peak_5137 | 6.90231  |                                                     |
| 11 | 34447694 | 34447986 | KD2-H4K8ac_peak_5138 | 10.72656 |                                                     |
| 11 | 34459893 | 34460283 | KD2-H4K8ac_peak_5139 | 14.00658 | CAT_ENSG00000121691                                 |
| 11 | 34937279 | 34937943 | KD2-H4K8ac_peak_5140 | 14.8083  | APIP_ENSG00000149089;PDHX_ENSG00000110435           |
| 11 | 34938224 | 34938664 | KD2-H4K8ac_peak_5141 | 17.14886 | APIP_ENSG00000149089;PDHX_ENSG00000110435           |
| 11 | 35160350 | 35161029 | KD2-H4K8ac_peak_5142 | 9.16531  | RP4-607I7.1_ENSG00000255521;CD44_ENSG00000026508    |
| 11 | 35179163 | 35179369 | KD2-H4K8ac_peak_5143 | 4.42765  |                                                     |
| 11 | 35441315 | 35441561 | KD2-H4K8ac_peak_5144 | 6.25869  | SLC1A2_ENSG00000110436;RP4-683L5.1_ENSG00000255542  |
| 11 | 35639572 | 35639812 | KD2-H4K8ac_peak_5145 | 8.52559  | FJX1_ENSG00000179431                                |
| 11 | 35640006 | 35640960 | KD2-H4K8ac_peak_5146 | 10.29736 | FJX1_ENSG00000179431                                |
| 11 | 35684358 | 35685027 | KD2-H4K8ac_peak_5147 | 21.50391 | TRIM44_ENSG00000166326                              |
| 11 | 35965849 | 35966240 | KD2-H4K8ac_peak_5148 | 7.70067  | LDLRAD3_ENSG00000179241                             |
| 11 | 36040984 | 36041180 | KD2-H4K8ac_peak_5149 | 7.13615  |                                                     |
| 11 | 36185416 | 36185848 | KD2-H4K8ac_peak_5150 | 4.211    |                                                     |

|    |          |          |                      |          |                                                          |
|----|----------|----------|----------------------|----------|----------------------------------------------------------|
| 11 | 36311061 | 36311394 | KD2-H4K8ac_peak_5151 | 4.77079  | COMMD9_ENSG00000110442                                   |
| 11 | 36531386 | 36531743 | KD2-H4K8ac_peak_5152 | 8.34752  | TRAF6_ENSG00000175104;RAG1_ENSG00000166349               |
| 11 | 36554601 | 36554801 | KD2-H4K8ac_peak_5153 | 7.27716  |                                                          |
| 11 | 36586894 | 36587168 | KD2-H4K8ac_peak_5154 | 7.8711   |                                                          |
| 11 | 36590722 | 36590963 | KD2-H4K8ac_peak_5155 | 7.26029  |                                                          |
| 11 | 36616256 | 36616481 | KD2-H4K8ac_peak_5156 | 5.9696   | C11orf74_ENSG00000166352                                 |
| 11 | 36638214 | 36638455 | KD2-H4K8ac_peak_5157 | 8.1233   |                                                          |
| 11 | 36640448 | 36640686 | KD2-H4K8ac_peak_5158 | 9.15329  |                                                          |
| 11 | 36648713 | 36649029 | KD2-H4K8ac_peak_5159 | 7.12754  |                                                          |
| 11 | 36649692 | 36649918 | KD2-H4K8ac_peak_5160 | 6.16888  |                                                          |
| 11 | 36652464 | 36652908 | KD2-H4K8ac_peak_5161 | 9.59147  |                                                          |
| 11 | 36814791 | 36815032 | KD2-H4K8ac_peak_5162 | 7.27716  |                                                          |
| 11 | 42983632 | 42983918 | KD2-H4K8ac_peak_5163 | 4.37708  |                                                          |
| 11 | 43333636 | 43333876 | KD2-H4K8ac_peak_5164 | 6.25869  | API5_ENSG00000166181                                     |
| 11 | 43380521 | 43380842 | KD2-H4K8ac_peak_5165 | 11.50346 | RP11-484D2.2_ENSG00000254907;TTC17_ENSG00000052841       |
| 11 | 43569068 | 43569478 | KD2-H4K8ac_peak_5166 | 6.66692  |                                                          |
| 11 | 43569718 | 43569997 | KD2-H4K8ac_peak_5167 | 3.75035  |                                                          |
| 11 | 43665884 | 43666077 | KD2-H4K8ac_peak_5168 | 6.40683  |                                                          |
| 11 | 43685614 | 43686028 | KD2-H4K8ac_peak_5169 | 6.75638  |                                                          |
| 11 | 43901879 | 43902856 | KD2-H4K8ac_peak_5170 | 17.38513 | RP11-613D13.5_ENSG00000246250;ALKBH3_ENSG00000166199     |
| 11 | 43923496 | 43923730 | KD2-H4K8ac_peak_5171 | 4.86824  |                                                          |
| 11 | 43925254 | 43925448 | KD2-H4K8ac_peak_5172 | 4.11746  |                                                          |
| 11 | 43926539 | 43926989 | KD2-H4K8ac_peak_5173 | 7.45501  |                                                          |
| 11 | 43928001 | 43928304 | KD2-H4K8ac_peak_5174 | 11.95211 |                                                          |
| 11 | 43928641 | 43929846 | KD2-H4K8ac_peak_5175 | 7.27716  |                                                          |
| 11 | 43933442 | 43934006 | KD2-H4K8ac_peak_5176 | 9.15069  |                                                          |
| 11 | 43941545 | 43941761 | KD2-H4K8ac_peak_5177 | 5.57044  | ALKBH3-AS1_ENSG00000244926;RP11-613D13.4_ENSG00000254409 |
| 11 | 43942589 | 43942858 | KD2-H4K8ac_peak_5178 | 5.40356  | ALKBH3-AS1_ENSG00000244926;RP11-613D13.4_ENSG00000254409 |
| 11 | 43943181 | 43943990 | KD2-H4K8ac_peak_5179 | 7.47462  | ALKBH3-AS1_ENSG00000244926;RP11-613D13.4_ENSG00000254409 |
| 11 | 43944369 | 43944880 | KD2-H4K8ac_peak_5180 | 6.25869  |                                                          |
| 11 | 43945792 | 43947451 | KD2-H4K8ac_peak_5181 | 15.05364 | C11orf96_ENSG00000187479                                 |
| 11 | 43948266 | 43948630 | KD2-H4K8ac_peak_5182 | 19.01066 |                                                          |
| 11 | 43949090 | 43949409 | KD2-H4K8ac_peak_5183 | 5.47227  |                                                          |
| 11 | 43950103 | 43950475 | KD2-H4K8ac_peak_5184 | 9.90914  |                                                          |
| 11 | 43954928 | 43955498 | KD2-H4K8ac_peak_5185 | 10.65724 |                                                          |
| 11 | 43956337 | 43956745 | KD2-H4K8ac_peak_5186 | 7.67504  |                                                          |
| 11 | 43962607 | 43963217 | KD2-H4K8ac_peak_5187 | 18.47871 |                                                          |
| 11 | 43963678 | 43964167 | KD2-H4K8ac_peak_5188 | 15.10495 |                                                          |
| 11 | 43964374 | 43965072 | KD2-H4K8ac_peak_5189 | 15.13261 |                                                          |
| 11 | 43965526 | 43966327 | KD2-H4K8ac_peak_5190 | 7.07117  |                                                          |
| 11 | 43966589 | 43967208 | KD2-H4K8ac_peak_5191 | 6.83936  |                                                          |
| 11 | 43969229 | 43969526 | KD2-H4K8ac_peak_5192 | 7.43041  | RP11-613D13.8_ENSG00000244953                            |
| 11 | 43970175 | 43970632 | KD2-H4K8ac_peak_5193 | 9.73431  |                                                          |
| 11 | 43983587 | 43983876 | KD2-H4K8ac_peak_5194 | 6.31143  |                                                          |
| 11 | 43984566 | 43985034 | KD2-H4K8ac_peak_5195 | 4.211    |                                                          |
| 11 | 44008815 | 44009458 | KD2-H4K8ac_peak_5196 | 11.50346 |                                                          |

|    |          |          |                      |          |                               |
|----|----------|----------|----------------------|----------|-------------------------------|
| 11 | 44009807 | 44010098 | KD2-H4K8ac_peak_5197 | 7.67504  |                               |
| 11 | 44011061 | 44011637 | KD2-H4K8ac_peak_5198 | 10.96455 |                               |
| 11 | 44026171 | 44027124 | KD2-H4K8ac_peak_5199 | 11.95211 |                               |
| 11 | 44027326 | 44027724 | KD2-H4K8ac_peak_5200 | 6.91644  |                               |
| 11 | 44088004 | 44088263 | KD2-H4K8ac_peak_5201 | 11.05407 | ACCS_ENSG00000110455          |
| 11 | 44307442 | 44307653 | KD2-H4K8ac_peak_5202 | 4.37815  |                               |
| 11 | 44559907 | 44560153 | KD2-H4K8ac_peak_5203 | 14.8083  |                               |
| 11 | 44586245 | 44586712 | KD2-H4K8ac_peak_5204 | 5.88845  | CD82_ENSG00000085117          |
| 11 | 44614156 | 44614365 | KD2-H4K8ac_peak_5205 | 6.56926  |                               |
| 11 | 44614775 | 44615233 | KD2-H4K8ac_peak_5206 | 4.86324  |                               |
| 11 | 44617634 | 44617859 | KD2-H4K8ac_peak_5207 | 4.211    |                               |
| 11 | 44624411 | 44624850 | KD2-H4K8ac_peak_5208 | 5.25667  |                               |
| 11 | 44638701 | 44638916 | KD2-H4K8ac_peak_5209 | 7.48822  |                               |
| 11 | 44649848 | 44650090 | KD2-H4K8ac_peak_5210 | 6.83936  | RPL34P22_ENSG00000244267      |
| 11 | 44656310 | 44657046 | KD2-H4K8ac_peak_5211 | 6.2781   |                               |
| 11 | 44715590 | 44716135 | KD2-H4K8ac_peak_5212 | 8.10216  |                               |
| 11 | 44724737 | 44724949 | KD2-H4K8ac_peak_5213 | 5.08628  |                               |
| 11 | 44733752 | 44734069 | KD2-H4K8ac_peak_5214 | 7.28628  |                               |
| 11 | 44747997 | 44748335 | KD2-H4K8ac_peak_5215 | 13.73635 | TSPAN18_ENSG00000157570       |
| 11 | 44748838 | 44749323 | KD2-H4K8ac_peak_5216 | 6.40297  | TSPAN18_ENSG00000157570       |
| 11 | 44764682 | 44765188 | KD2-H4K8ac_peak_5217 | 9.08816  |                               |
| 11 | 44765656 | 44766034 | KD2-H4K8ac_peak_5218 | 5.58725  |                               |
| 11 | 44774773 | 44775124 | KD2-H4K8ac_peak_5219 | 11.05407 |                               |
| 11 | 44775680 | 44776570 | KD2-H4K8ac_peak_5220 | 10.72656 |                               |
| 11 | 44776925 | 44777137 | KD2-H4K8ac_peak_5221 | 7.51054  |                               |
| 11 | 44777337 | 44777727 | KD2-H4K8ac_peak_5222 | 9.63487  |                               |
| 11 | 44782699 | 44783162 | KD2-H4K8ac_peak_5223 | 9.1707   |                               |
| 11 | 44783477 | 44783797 | KD2-H4K8ac_peak_5224 | 6.66692  |                               |
| 11 | 44797806 | 44798190 | KD2-H4K8ac_peak_5225 | 5.73016  |                               |
| 11 | 44798456 | 44798984 | KD2-H4K8ac_peak_5226 | 4.54006  |                               |
| 11 | 44802025 | 44802462 | KD2-H4K8ac_peak_5227 | 7.95934  |                               |
| 11 | 44805172 | 44805401 | KD2-H4K8ac_peak_5228 | 7.70289  |                               |
| 11 | 44805946 | 44806218 | KD2-H4K8ac_peak_5229 | 9.16531  |                               |
| 11 | 44861326 | 44861639 | KD2-H4K8ac_peak_5230 | 8.37231  |                               |
| 11 | 44915364 | 44915870 | KD2-H4K8ac_peak_5231 | 6.05809  |                               |
| 11 | 44971918 | 44972407 | KD2-H4K8ac_peak_5232 | 6.67538  | TP53I11_ENSG00000175274       |
| 11 | 45047716 | 45048014 | KD2-H4K8ac_peak_5233 | 8.26945  |                               |
| 11 | 45167692 | 45168251 | KD2-H4K8ac_peak_5234 | 16.57619 |                               |
| 11 | 45168881 | 45169305 | KD2-H4K8ac_peak_5235 | 13.12288 |                               |
| 11 | 45179765 | 45180455 | KD2-H4K8ac_peak_5236 | 6.85193  |                               |
| 11 | 45182774 | 45183085 | KD2-H4K8ac_peak_5237 | 6.16747  |                               |
| 11 | 45201609 | 45202932 | KD2-H4K8ac_peak_5238 | 15.58442 |                               |
| 11 | 45307681 | 45308085 | KD2-H4K8ac_peak_5239 | 3.75035  | SYT13_ENSG00000019505         |
| 11 | 45376375 | 45376716 | KD2-H4K8ac_peak_5240 | 10.21366 | RP11-430H10.1_ENSG00000254427 |
| 11 | 45432417 | 45433279 | KD2-H4K8ac_peak_5241 | 15.22643 |                               |
| 11 | 45582022 | 45582638 | KD2-H4K8ac_peak_5242 | 16.8435  |                               |

|    |          |          |                      |          |                                                                     |
|----|----------|----------|----------------------|----------|---------------------------------------------------------------------|
| 11 | 45793192 | 45793390 | KD2-H4K8ac_peak_5243 | 6.56926  | CTD-2210P24.4_ENSG00000205106                                       |
| 11 | 45826208 | 45826525 | KD2-H4K8ac_peak_5244 | 6.30607  | SLC35C1_ENSG00000181830                                             |
| 11 | 45921410 | 45921604 | KD2-H4K8ac_peak_5245 | 10.44656 |                                                                     |
| 11 | 45939061 | 45939528 | KD2-H4K8ac_peak_5246 | 8.01894  | PEX16_ENSG00000121680                                               |
| 11 | 45939906 | 45940212 | KD2-H4K8ac_peak_5247 | 8.23274  | PEX16_ENSG00000121680                                               |
| 11 | 45943803 | 45945100 | KD2-H4K8ac_peak_5248 | 12.99417 | GYLTL1B_ENSG00000165905                                             |
| 11 | 46073149 | 46073350 | KD2-H4K8ac_peak_5249 | 8.1233   |                                                                     |
| 11 | 46141411 | 46141637 | KD2-H4K8ac_peak_5250 | 10.21502 |                                                                     |
| 11 | 46143493 | 46143721 | KD2-H4K8ac_peak_5251 | 12.99417 | PHF21A_ENSG00000135365                                              |
| 11 | 46158235 | 46158518 | KD2-H4K8ac_peak_5252 | 6.16888  |                                                                     |
| 11 | 46259720 | 46259945 | KD2-H4K8ac_peak_5253 | 6.65673  | CTD-2589M5.5_ENSG00000254639                                        |
| 11 | 46264618 | 46264893 | KD2-H4K8ac_peak_5254 | 8.28234  |                                                                     |
| 11 | 46265157 | 46265447 | KD2-H4K8ac_peak_5255 | 14.65304 |                                                                     |
| 11 | 46337631 | 46337892 | KD2-H4K8ac_peak_5256 | 6.56926  |                                                                     |
| 11 | 46384253 | 46384692 | KD2-H4K8ac_peak_5257 | 5.90414  |                                                                     |
| 11 | 46388670 | 46388872 | KD2-H4K8ac_peak_5258 | 4.37815  |                                                                     |
| 11 | 46391332 | 46391579 | KD2-H4K8ac_peak_5259 | 4.87217  |                                                                     |
| 11 | 46401472 | 46401781 | KD2-H4K8ac_peak_5260 | 8.85813  | MDK_ENSG00000110492                                                 |
| 11 | 46402198 | 46403071 | KD2-H4K8ac_peak_5261 | 23.67389 | MDK_ENSG00000110492                                                 |
| 11 | 46403326 | 46404033 | KD2-H4K8ac_peak_5262 | 19.23713 |                                                                     |
| 11 | 46615207 | 46615436 | KD2-H4K8ac_peak_5263 | 8.30974  | AMBRA1_ENSG00000110497                                              |
| 11 | 46639135 | 46639763 | KD2-H4K8ac_peak_5264 | 14.8083  | HARBII_ENSG00000180423;ATG13_ENSG00000175224                        |
| 11 | 46722349 | 46723101 | KD2-H4K8ac_peak_5265 | 12.79505 | ARHGAP1_ENSG00000175220;ZNF408_ENSG00000175213                      |
| 11 | 46739846 | 46740253 | KD2-H4K8ac_peak_5266 | 4.77079  | F2_ENSG00000180210                                                  |
| 11 | 46867160 | 46867696 | KD2-H4K8ac_peak_5267 | 7.45501  | CKAP5_ENSG00000175216;LRP4-AS1_ENSG00000247675                      |
| 11 | 46957536 | 46957813 | KD2-H4K8ac_peak_5268 | 8.1233   | C11orf49_ENSG00000149179                                            |
| 11 | 47119903 | 47120209 | KD2-H4K8ac_peak_5269 | 4.01115  |                                                                     |
| 11 | 47197892 | 47198272 | KD2-H4K8ac_peak_5270 | 9.36665  | ARFGAP2_ENSG00000149182                                             |
| 11 | 47206370 | 47206702 | KD2-H4K8ac_peak_5271 | 4.42765  |                                                                     |
| 11 | 47207233 | 47208458 | KD2-H4K8ac_peak_5272 | 10.77651 | PACSIN3_ENSG00000165912                                             |
| 11 | 47208813 | 47209137 | KD2-H4K8ac_peak_5273 | 9.36516  | PACSIN3_ENSG00000165912                                             |
| 11 | 47236601 | 47237269 | KD2-H4K8ac_peak_5274 | 15.59774 | DDB2_ENSG00000134574                                                |
| 11 | 47270037 | 47271306 | KD2-H4K8ac_peak_5275 | 7.76329  | ACP2_ENSG00000134575;NR1H3_ENSG0000025434                           |
| 11 | 47290265 | 47291052 | KD2-H4K8ac_peak_5276 | 5.54647  | MADD_ENSG00000110514                                                |
| 11 | 47421345 | 47422205 | KD2-H4K8ac_peak_5277 | 11.92978 | MIR4487_ENSG00000264583                                             |
| 11 | 47428864 | 47429892 | KD2-H4K8ac_peak_5278 | 7.76104  | SLC39A13_ENSG00000165915;RP11-750H9.5_ENSG00000255197               |
| 11 | 47430189 | 47430654 | KD2-H4K8ac_peak_5279 | 13.5195  | RP11-750H9.5_ENSG00000255197                                        |
| 11 | 47447260 | 47447974 | KD2-H4K8ac_peak_5280 | 11.09936 | PSMC3_ENSG00000165916                                               |
| 11 | 47574075 | 47574472 | KD2-H4K8ac_peak_5281 | 5.72657  |                                                                     |
| 11 | 47574934 | 47575136 | KD2-H4K8ac_peak_5282 | 9.36516  |                                                                     |
| 11 | 47586606 | 47587710 | KD2-H4K8ac_peak_5283 | 20.47312 | CELF1_ENSG00000149187;NDUFS3_ENSG00000213619;PTPMT1_ENSG00000110536 |
| 11 | 47600665 | 47601093 | KD2-H4K8ac_peak_5284 | 7.07117  | KBTD4_ENSG00000123444                                               |
| 11 | 47615585 | 47615816 | KD2-H4K8ac_peak_5285 | 4.86324  | C1QTNF4_ENSG00000172247                                             |
| 11 | 47616044 | 47616255 | KD2-H4K8ac_peak_5286 | 7.13615  | C1QTNF4_ENSG00000172247                                             |
| 11 | 47663591 | 47663996 | KD2-H4K8ac_peak_5287 | 7.47462  | MTCH2_ENSG00000109919                                               |
| 11 | 47736329 | 47736916 | KD2-H4K8ac_peak_5288 | 6.40297  | AGBL2_ENSG00000165923                                               |

|    |          |          |                      |          |                                                                               |
|----|----------|----------|----------------------|----------|-------------------------------------------------------------------------------|
| 11 | 47788294 | 47788589 | KD2-H4K8ac_peak_5289 | 7.28628  | FNBP4_ENSG00000109920                                                         |
| 11 | 47789311 | 47790021 | KD2-H4K8ac_peak_5290 | 11.92978 | FNBP4_ENSG00000109920                                                         |
| 11 | 47790430 | 47790680 | KD2-H4K8ac_peak_5291 | 4.67342  |                                                                               |
| 11 | 47848741 | 47848935 | KD2-H4K8ac_peak_5292 | 9.15329  |                                                                               |
| 11 | 47869642 | 47870562 | KD2-H4K8ac_peak_5293 | 12.93209 | NUP160_ENSG00000030066                                                        |
| 11 | 47936082 | 47936342 | KD2-H4K8ac_peak_5294 | 4.86324  |                                                                               |
| 11 | 47939175 | 47939536 | KD2-H4K8ac_peak_5295 | 7.146    |                                                                               |
| 11 | 47940137 | 47940445 | KD2-H4K8ac_peak_5296 | 6.39197  |                                                                               |
| 11 | 48001523 | 48001801 | KD2-H4K8ac_peak_5297 | 9.98013  | PTPRJ_ENSG00000149177                                                         |
| 11 | 48131281 | 48131537 | KD2-H4K8ac_peak_5298 | 10.96455 |                                                                               |
| 11 | 48131853 | 48132090 | KD2-H4K8ac_peak_5299 | 8.17902  |                                                                               |
| 11 | 50257051 | 50257300 | KD2-H4K8ac_peak_5300 | 7.12754  | RP11-347H15.4_ENSG00000254518                                                 |
| 11 | 55640533 | 55640735 | KD2-H4K8ac_peak_5301 | 6.10699  |                                                                               |
| 11 | 56865814 | 56866173 | KD2-H4K8ac_peak_5302 | 8.97719  |                                                                               |
| 11 | 56923799 | 56924110 | KD2-H4K8ac_peak_5303 | 6.40683  |                                                                               |
| 11 | 57005065 | 57005287 | KD2-H4K8ac_peak_5304 | 5.57044  | APLNR_ENSG00000134817                                                         |
| 11 | 57071714 | 57072032 | KD2-H4K8ac_peak_5305 | 9.72244  |                                                                               |
| 11 | 57091558 | 57091805 | KD2-H4K8ac_peak_5306 | 6.98292  | TNKS1BP1_ENSG00000149115                                                      |
| 11 | 57102966 | 57103246 | KD2-H4K8ac_peak_5307 | 10.96455 | SSRP1_ENSG00000149136                                                         |
| 11 | 57103471 | 57104101 | KD2-H4K8ac_peak_5308 | 10.05606 | SSRP1_ENSG00000149136                                                         |
| 11 | 57112924 | 57113255 | KD2-H4K8ac_peak_5309 | 12.25733 |                                                                               |
| 11 | 57117107 | 57117376 | KD2-H4K8ac_peak_5310 | 9.20193  |                                                                               |
| 11 | 57228000 | 57228417 | KD2-H4K8ac_peak_5311 | 12.93209 | RTN4RL2_ENSG00000186907                                                       |
| 11 | 57243642 | 57244796 | KD2-H4K8ac_peak_5312 | 16.8435  | RP11-624G17.3_ENSG00000255301                                                 |
| 11 | 57249611 | 57250568 | KD2-H4K8ac_peak_5313 | 14.69247 |                                                                               |
| 11 | 57266925 | 57267149 | KD2-H4K8ac_peak_5314 | 6.83936  |                                                                               |
| 11 | 57281518 | 57282368 | KD2-H4K8ac_peak_5315 | 7.95563  | SLC43A1_ENSG00000149150                                                       |
| 11 | 57282904 | 57283459 | KD2-H4K8ac_peak_5316 | 7.64093  | SLC43A1_ENSG00000149150                                                       |
| 11 | 57297624 | 57298106 | KD2-H4K8ac_peak_5317 | 7.36799  | TIMM10_ENSG00000134809                                                        |
| 11 | 57335295 | 57335734 | KD2-H4K8ac_peak_5318 | 6.65673  | UBE2L6_ENSG00000156587                                                        |
| 11 | 57365586 | 57365944 | KD2-H4K8ac_peak_5319 | 9.34989  | SERPING1_ENSG00000149131                                                      |
| 11 | 57404949 | 57405646 | KD2-H4K8ac_peak_5320 | 8.86099  | AP000662.4_ENSG00000254602                                                    |
| 11 | 57405879 | 57406186 | KD2-H4K8ac_peak_5321 | 7.36799  | AP000662.4_ENSG00000254602                                                    |
| 11 | 57435499 | 57436117 | KD2-H4K8ac_peak_5322 | 8.85813  | ZDHHC5_ENSG00000156599                                                        |
| 11 | 57479418 | 57479613 | KD2-H4K8ac_peak_5323 | 8.26945  | MED19_ENSG00000156603;TMX2_ENSG00000213593;TMX2-CTNND1_ENSG00000254462        |
| 11 | 57480108 | 57480425 | KD2-H4K8ac_peak_5324 | 12.06346 | MED19_ENSG00000156603;TMX2_ENSG00000213593;TMX2-CTNND1_ENSG00000254462        |
| 11 | 57508385 | 57508675 | KD2-H4K8ac_peak_5325 | 9.1707   | RP11-691N7.6_ENSG00000254732;C11orf31_ENSG00000211450                         |
| 11 | 57509053 | 57509456 | KD2-H4K8ac_peak_5326 | 7.51054  | RP11-691N7.6_ENSG00000254732;C11orf31_ENSG00000211450                         |
| 11 | 57528461 | 57528811 | KD2-H4K8ac_peak_5327 | 9.23578  |                                                                               |
| 11 | 58346108 | 58346330 | KD2-H4K8ac_peak_5328 | 8.55271  | LPXN_ENSG00000110031;ZFP91_ENSG00000186660;ZFP91-CNTF_ENSG00000255073         |
| 11 | 58346688 | 58347430 | KD2-H4K8ac_peak_5329 | 19.93588 | LPXN_ENSG00000110031;ZFP91_ENSG00000186660;ZFP91-CNTF_ENSG00000255073         |
| 11 | 58672591 | 58673106 | KD2-H4K8ac_peak_5330 | 9.11818  | AP001652.1_ENSG00000224130                                                    |
| 11 | 58873773 | 58874001 | KD2-H4K8ac_peak_5331 | 5.88845  | FAM111B_ENSG00000189057                                                       |
| 11 | 58910170 | 58910561 | KD2-H4K8ac_peak_5332 | 7.27716  | AP001258.4_ENSG00000245571;AP001258.5_ENSG00000255381;FAM111A_ENSG00000166801 |
| 11 | 59304391 | 59304640 | KD2-H4K8ac_peak_5333 | 12.42547 |                                                                               |
| 11 | 59316565 | 59316811 | KD2-H4K8ac_peak_5334 | 11.15509 |                                                                               |



|    |          |          |                      |          |                                                                                           |
|----|----------|----------|----------------------|----------|-------------------------------------------------------------------------------------------|
| 11 | 59323285 | 59323564 | KD2-H4K8ac_peak_5335 | 11.05407 |                                                                                           |
| 11 | 59327973 | 59328348 | KD2-H4K8ac_peak_5336 | 9.51688  |                                                                                           |
| 11 | 59333292 | 59333693 | KD2-H4K8ac_peak_5337 | 6.2781   | AP000442.4_ENSG00000255008                                                                |
| 11 | 59522959 | 59523193 | KD2-H4K8ac_peak_5338 | 9.95119  | AP000640.10_ENSG00000254477                                                               |
| 11 | 59528727 | 59528996 | KD2-H4K8ac_peak_5339 | 13.57066 |                                                                                           |
| 11 | 59529825 | 59530181 | KD2-H4K8ac_peak_5340 | 9.16531  |                                                                                           |
| 11 | 59577503 | 59579061 | KD2-H4K8ac_peak_5341 | 16.32216 | MRPL16_ENSG00000166902                                                                    |
| 11 | 60608387 | 60608591 | KD2-H4K8ac_peak_5342 | 4.66652  | CCDC86_ENSG00000110104                                                                    |
| 11 | 60608989 | 60609373 | KD2-H4K8ac_peak_5343 | 8.23274  | CCDC86_ENSG00000110104                                                                    |
| 11 | 60673687 | 60674009 | KD2-H4K8ac_peak_5344 | 10.21366 | PRPF19_ENSG00000110107;RP11-881M11.2_ENSG00000257052                                      |
| 11 | 60680775 | 60681205 | KD2-H4K8ac_peak_5345 | 8.23274  | RP11-881M11.1_ENSG00000256944;TMEM109_ENSG00000110108                                     |
| 11 | 60681661 | 60682000 | KD2-H4K8ac_peak_5346 | 7.76329  | RP11-881M11.1_ENSG00000256944;TMEM109_ENSG00000110108                                     |
| 11 | 60691451 | 60691757 | KD2-H4K8ac_peak_5347 | 5.57044  | TMEM132A_ENSG00000006118                                                                  |
| 11 | 60691984 | 60692684 | KD2-H4K8ac_peak_5348 | 12.36441 | RP11-881M11.4_ENSG00000256196;TMEM132A_ENSG00000006118                                    |
| 11 | 60749009 | 60749384 | KD2-H4K8ac_peak_5349 | 5.77265  |                                                                                           |
| 11 | 60774891 | 60775603 | KD2-H4K8ac_peak_5350 | 8.55271  |                                                                                           |
| 11 | 60888906 | 60889141 | KD2-H4K8ac_peak_5351 | 13.08184 |                                                                                           |
| 11 | 60893261 | 60893686 | KD2-H4K8ac_peak_5352 | 6.25014  |                                                                                           |
| 11 | 60927847 | 60928187 | KD2-H4K8ac_peak_5353 | 4.20044  | VPS37C_ENSG00000167987                                                                    |
| 11 | 60928875 | 60929566 | KD2-H4K8ac_peak_5354 | 22.21705 | VPS37C_ENSG00000167987                                                                    |
| 11 | 60930070 | 60930379 | KD2-H4K8ac_peak_5355 | 5.57044  | VPS37C_ENSG00000167987                                                                    |
| 11 | 61061446 | 61061719 | KD2-H4K8ac_peak_5356 | 4.70206  |                                                                                           |
| 11 | 61062017 | 61063195 | KD2-H4K8ac_peak_5357 | 11.28765 | VWCE_ENSG00000167992                                                                      |
| 11 | 61100779 | 61101448 | KD2-H4K8ac_peak_5358 | 12.00597 | DAK_ENSG00000149476                                                                       |
| 11 | 61104148 | 61104451 | KD2-H4K8ac_peak_5359 | 10.44656 |                                                                                           |
| 11 | 61113208 | 61113444 | KD2-H4K8ac_peak_5360 | 10.87093 |                                                                                           |
| 11 | 61128824 | 61129732 | KD2-H4K8ac_peak_5361 | 12.82393 | CYB561A3_ENSG00000162144;TMEM138_ENSG00000149483                                          |
| 11 | 61159352 | 61160425 | KD2-H4K8ac_peak_5362 | 12.06346 | TMEM216_ENSG00000187049                                                                   |
| 11 | 61196994 | 61197439 | KD2-H4K8ac_peak_5363 | 15.01306 | CPSF7_ENSG00000149532;RP11-286N22.8_ENSG00000256591;SDHAF2_ENSG00000167985                |
| 11 | 61197663 | 61197916 | KD2-H4K8ac_peak_5364 | 6.25869  | CPSF7_ENSG00000149532;RP11-286N22.8_ENSG00000256591;SDHAF2_ENSG00000167985                |
| 11 | 61297028 | 61297220 | KD2-H4K8ac_peak_5365 | 5.20908  |                                                                                           |
| 11 | 61298931 | 61299184 | KD2-H4K8ac_peak_5366 | 4.46868  |                                                                                           |
| 11 | 61309615 | 61310469 | KD2-H4K8ac_peak_5367 | 10.72313 | RP11-794G24.1_ENSG00000256443                                                             |
| 11 | 61322404 | 61323001 | KD2-H4K8ac_peak_5368 | 8.26565  |                                                                                           |
| 11 | 61447351 | 61447698 | KD2-H4K8ac_peak_5369 | 12.08081 |                                                                                           |
| 11 | 61485396 | 61485967 | KD2-H4K8ac_peak_5370 | 10.54073 |                                                                                           |
| 11 | 61486209 | 61486626 | KD2-H4K8ac_peak_5371 | 15.58963 |                                                                                           |
| 11 | 61514801 | 61515028 | KD2-H4K8ac_peak_5372 | 5.14125  |                                                                                           |
| 11 | 61520113 | 61520526 | KD2-H4K8ac_peak_5373 | 7.47462  | MYRF_ENSG00000124920                                                                      |
| 11 | 61530135 | 61530725 | KD2-H4K8ac_peak_5374 | 7.95934  |                                                                                           |
| 11 | 61532744 | 61533067 | KD2-H4K8ac_peak_5375 | 3.75035  |                                                                                           |
| 11 | 61539747 | 61540210 | KD2-H4K8ac_peak_5376 | 9.05772  |                                                                                           |
| 11 | 61559542 | 61560923 | KD2-H4K8ac_peak_5377 | 15.61313 | TMEM258_ENSG00000134825;MIR611_ENSG00000207601;FEN1_ENSG00000168496;FADS2_ENSG00000134824 |
| 11 | 61582305 | 61582603 | KD2-H4K8ac_peak_5378 | 11.81678 | MIR1908_ENSG00000222326                                                                   |
| 11 | 61582966 | 61584300 | KD2-H4K8ac_peak_5379 | 18.54875 | MIR1908_ENSG00000222326                                                                   |
| 11 | 61584712 | 61585046 | KD2-H4K8ac_peak_5380 | 13.56049 |                                                                                           |

|    |          |          |                      |          |                                                                               |
|----|----------|----------|----------------------|----------|-------------------------------------------------------------------------------|
| 11 | 61594116 | 61595295 | KD2-H4K8ac_peak_5381 | 16.09057 |                                                                               |
| 11 | 61595575 | 61596792 | KD2-H4K8ac_peak_5382 | 19.33018 | FADS1_ENSG00000149485                                                         |
| 11 | 61638397 | 61639006 | KD2-H4K8ac_peak_5383 | 4.67342  |                                                                               |
| 11 | 61658376 | 61659788 | KD2-H4K8ac_peak_5384 | 20.88898 | FADS3_ENSG00000221968                                                         |
| 11 | 61684623 | 61685464 | KD2-H4K8ac_peak_5385 | 8.85813  |                                                                               |
| 11 | 61690457 | 61691090 | KD2-H4K8ac_peak_5386 | 3.83717  |                                                                               |
| 11 | 61714970 | 61715171 | KD2-H4K8ac_peak_5387 | 6.25869  |                                                                               |
| 11 | 61717321 | 61718003 | KD2-H4K8ac_peak_5388 | 15.18544 | BEST1_ENSG00000167995                                                         |
| 11 | 61734842 | 61735053 | KD2-H4K8ac_peak_5389 | 12.79505 | FTH1_ENSG00000167996;AP003733.1_ENSG00000269089                               |
| 11 | 61735340 | 61736114 | KD2-H4K8ac_peak_5390 | 8.53092  | FTH1_ENSG00000167996;AP003733.1_ENSG00000269089                               |
| 11 | 61738946 | 61739304 | KD2-H4K8ac_peak_5391 | 5.88845  |                                                                               |
| 11 | 61880275 | 61880469 | KD2-H4K8ac_peak_5392 | 4.54006  |                                                                               |
| 11 | 61891552 | 61891880 | KD2-H4K8ac_peak_5393 | 5.9696   | INCENP_ENSG00000149503                                                        |
| 11 | 62104980 | 62105447 | KD2-H4K8ac_peak_5394 | 9.41619  | RP11-703H8.7_ENSG00000255118                                                  |
| 11 | 62149249 | 62149518 | KD2-H4K8ac_peak_5395 | 5.57044  |                                                                               |
| 11 | 62162857 | 62163102 | KD2-H4K8ac_peak_5396 | 5.88845  |                                                                               |
| 11 | 62165563 | 62165927 | KD2-H4K8ac_peak_5397 | 8.17902  |                                                                               |
| 11 | 62167344 | 62167692 | KD2-H4K8ac_peak_5398 | 4.56666  |                                                                               |
| 11 | 62168433 | 62169280 | KD2-H4K8ac_peak_5399 | 8.30974  |                                                                               |
| 11 | 62340965 | 62341357 | KD2-H4K8ac_peak_5400 | 9.89126  |                                                                               |
| 11 | 62341746 | 62342105 | KD2-H4K8ac_peak_5401 | 8.79106  | EEF1G_ENSG00000254772                                                         |
| 11 | 62359461 | 62359727 | KD2-H4K8ac_peak_5402 | 7.69287  | MIR3654_ENSG00000255508;TUT1_ENSG00000149016                                  |
| 11 | 62368665 | 62369269 | KD2-H4K8ac_peak_5403 | 9.78882  | MTA2_ENSG00000149480                                                          |
| 11 | 62379717 | 62380044 | KD2-H4K8ac_peak_5404 | 6.97919  | EML3_ENSG00000149499;ROM1_ENSG00000149489                                     |
| 11 | 62413680 | 62414034 | KD2-H4K8ac_peak_5405 | 9.26408  | GANAB_ENSG00000089597                                                         |
| 11 | 62420984 | 62421188 | KD2-H4K8ac_peak_5406 | 14.15075 | INTS5_ENSG00000185085                                                         |
| 11 | 62432189 | 62432640 | KD2-H4K8ac_peak_5407 | 7.96322  | RP11-831H9.11_ENSG00000255432;METTL12_ENSG00000214756;SNORA57_ENSG00000206597 |
| 11 | 62432934 | 62433211 | KD2-H4K8ac_peak_5408 | 6.2781   | RP11-831H9.11_ENSG00000255432;METTL12_ENSG00000214756;SNORA57_ENSG00000206597 |
| 11 | 62438973 | 62439710 | KD2-H4K8ac_peak_5409 | 9.20193  | C11orf48_ENSG00000162194                                                      |
| 11 | 62446264 | 62447084 | KD2-H4K8ac_peak_5410 | 11.66477 | UBXN1_ENSG00000162191                                                         |
| 11 | 62447983 | 62448606 | KD2-H4K8ac_peak_5411 | 5.30799  |                                                                               |
| 11 | 62477216 | 62477664 | KD2-H4K8ac_peak_5412 | 17.27647 | BSCL2_ENSG00000168000                                                         |
| 11 | 62494234 | 62494899 | KD2-H4K8ac_peak_5413 | 17.27647 | HNRNPUL2-BSCL2_ENSG00000234857;HNRNPUL2_ENSG00000214753;TTC9C_ENSG00000162222 |
| 11 | 62495638 | 62495850 | KD2-H4K8ac_peak_5414 | 15.9754  | HNRNPUL2-BSCL2_ENSG00000234857;HNRNPUL2_ENSG00000214753;TTC9C_ENSG00000162222 |
| 11 | 62520902 | 62521190 | KD2-H4K8ac_peak_5415 | 4.77079  | ZBTB3_ENSG00000185670                                                         |
| 11 | 62528573 | 62528769 | KD2-H4K8ac_peak_5416 | 5.75452  | POLR2G_ENSG00000168002                                                        |
| 11 | 62538143 | 62538489 | KD2-H4K8ac_peak_5417 | 7.36799  | RP11-727F15.11_ENSG00000267811;TAF6L_ENSG00000162227                          |
| 11 | 62538887 | 62539148 | KD2-H4K8ac_peak_5418 | 8.58725  | RP11-727F15.11_ENSG00000267811;TAF6L_ENSG00000162227                          |
| 11 | 62554372 | 62554709 | KD2-H4K8ac_peak_5419 | 8.58069  | RP11-727F15.12_ENSG00000269176;TMEM179B_ENSG00000185475                       |
| 11 | 62558707 | 62559376 | KD2-H4K8ac_peak_5420 | 9.95119  | TMEM223_ENSG00000168569                                                       |
| 11 | 62598607 | 62598995 | KD2-H4K8ac_peak_5421 | 5.54647  | STX5_ENSG00000162236;RP11-727F15.9_ENSG00000256690                            |
| 11 | 62606647 | 62607003 | KD2-H4K8ac_peak_5422 | 7.92775  |                                                                               |
| 11 | 62608294 | 62608509 | KD2-H4K8ac_peak_5423 | 7.79898  | WDR74_ENSG00000133316;RNU2-2P_ENSG00000222328                                 |
| 11 | 62609603 | 62610147 | KD2-H4K8ac_peak_5424 | 11.2938  | WDR74_ENSG00000133316;RNU2-2P_ENSG00000222328                                 |
| 11 | 62623688 | 62623956 | KD2-H4K8ac_peak_5425 | 8.28234  | SNHG1_ENSG00000255717;SLC3A2_ENSG00000168003                                  |
| 11 | 62624465 | 62624962 | KD2-H4K8ac_peak_5426 | 6.66692  | SLC3A2_ENSG00000168003                                                        |

|    |          |          |                      |          |                                                        |
|----|----------|----------|----------------------|----------|--------------------------------------------------------|
| 11 | 62648575 | 62648830 | KD2-H4K8ac_peak_5427 | 5.75757  |                                                        |
| 11 | 62677100 | 62677332 | KD2-H4K8ac_peak_5428 | 5.82799  | AP000438.2_ENSG00000257002                             |
| 11 | 62677712 | 62678501 | KD2-H4K8ac_peak_5429 | 7.70289  | AP000438.2_ENSG00000257002                             |
| 11 | 62679920 | 62680333 | KD2-H4K8ac_peak_5430 | 8.17902  |                                                        |
| 11 | 62688498 | 62688709 | KD2-H4K8ac_peak_5431 | 4.86324  | CHRM1_ENSG00000168539                                  |
| 11 | 62688911 | 62689118 | KD2-H4K8ac_peak_5432 | 5.30799  | CHRM1_ENSG00000168539                                  |
| 11 | 62784475 | 62785100 | KD2-H4K8ac_peak_5433 | 7.47462  |                                                        |
| 11 | 63438296 | 63439056 | KD2-H4K8ac_peak_5434 | 15.05364 | ATL3_ENSG00000184743                                   |
| 11 | 63439352 | 63439610 | KD2-H4K8ac_peak_5435 | 6.84261  | ATL3_ENSG00000184743                                   |
| 11 | 63449039 | 63449314 | KD2-H4K8ac_peak_5436 | 8.55271  | RTN3_ENSG00000133318                                   |
| 11 | 63535274 | 63536075 | KD2-H4K8ac_peak_5437 | 9.59814  | C11orf95_ENSG00000188070;RP11-466C23.4_ENSG00000255651 |
| 11 | 63536373 | 63537402 | KD2-H4K8ac_peak_5438 | 18.75146 | C11orf95_ENSG00000188070;RP11-466C23.4_ENSG00000255651 |
| 11 | 63551881 | 63552080 | KD2-H4K8ac_peak_5439 | 6.1228   |                                                        |
| 11 | 63581085 | 63581451 | KD2-H4K8ac_peak_5440 | 7.51054  | C11orf84_ENSG00000168005                               |
| 11 | 63606626 | 63606845 | KD2-H4K8ac_peak_5441 | 7.98621  | MARK2_ENSG00000072518                                  |
| 11 | 63683377 | 63684447 | KD2-H4K8ac_peak_5442 | 14.8083  | RCOR2_ENSG00000167771                                  |
| 11 | 63684791 | 63685416 | KD2-H4K8ac_peak_5443 | 19.42408 | RCOR2_ENSG00000167771                                  |
| 11 | 63685765 | 63687636 | KD2-H4K8ac_peak_5444 | 13.80019 |                                                        |
| 11 | 63687941 | 63688273 | KD2-H4K8ac_peak_5445 | 6.53538  |                                                        |
| 11 | 63742140 | 63742375 | KD2-H4K8ac_peak_5446 | 5.75757  | COX8A_ENSG00000176340;AP000721.4_ENSG00000256100       |
| 11 | 63753082 | 63754491 | KD2-H4K8ac_peak_5447 | 8.10216  | OTUB1_ENSG00000167770                                  |
| 11 | 63775078 | 63775541 | KD2-H4K8ac_peak_5448 | 4.86324  |                                                        |
| 11 | 63812155 | 63812419 | KD2-H4K8ac_peak_5449 | 6.62541  |                                                        |
| 11 | 63812838 | 63813323 | KD2-H4K8ac_peak_5450 | 8.0372   |                                                        |
| 11 | 63813617 | 63813958 | KD2-H4K8ac_peak_5451 | 7.95563  |                                                        |
| 11 | 63820105 | 63821374 | KD2-H4K8ac_peak_5452 | 10.94055 |                                                        |
| 11 | 63822496 | 63823767 | KD2-H4K8ac_peak_5453 | 14.4394  |                                                        |
| 11 | 63823992 | 63824757 | KD2-H4K8ac_peak_5454 | 9.67696  |                                                        |
| 11 | 63824978 | 63825290 | KD2-H4K8ac_peak_5455 | 4.86324  |                                                        |
| 11 | 63825668 | 63825979 | KD2-H4K8ac_peak_5456 | 11.7608  |                                                        |
| 11 | 63826473 | 63828467 | KD2-H4K8ac_peak_5457 | 18.31034 |                                                        |
| 11 | 63828808 | 63829081 | KD2-H4K8ac_peak_5458 | 16.57619 |                                                        |
| 11 | 63829571 | 63829771 | KD2-H4K8ac_peak_5459 | 7.35057  |                                                        |
| 11 | 63830927 | 63831150 | KD2-H4K8ac_peak_5460 | 4.52804  |                                                        |
| 11 | 63831485 | 63832647 | KD2-H4K8ac_peak_5461 | 6.67538  |                                                        |
| 11 | 63834935 | 63835346 | KD2-H4K8ac_peak_5462 | 10.77651 |                                                        |
| 11 | 63835648 | 63835883 | KD2-H4K8ac_peak_5463 | 5.18937  |                                                        |
| 11 | 63836111 | 63836307 | KD2-H4K8ac_peak_5464 | 6.24992  |                                                        |
| 11 | 63841465 | 63841837 | KD2-H4K8ac_peak_5465 | 6.20524  |                                                        |
| 11 | 63844568 | 63844808 | KD2-H4K8ac_peak_5466 | 7.42964  |                                                        |
| 11 | 63845106 | 63845792 | KD2-H4K8ac_peak_5467 | 14.17488 |                                                        |
| 11 | 63846113 | 63846787 | KD2-H4K8ac_peak_5468 | 9.90914  |                                                        |
| 11 | 63850091 | 63850499 | KD2-H4K8ac_peak_5469 | 6.40297  | RP11-21A7A.4_ENSG00000256481                           |
| 11 | 63851516 | 63852771 | KD2-H4K8ac_peak_5470 | 19.06706 |                                                        |
| 11 | 63853115 | 63853350 | KD2-H4K8ac_peak_5471 | 10.0665  |                                                        |
| 11 | 63853563 | 63854079 | KD2-H4K8ac_peak_5472 | 9.9355   |                                                        |

|    |          |          |                      |          |                                                        |
|----|----------|----------|----------------------|----------|--------------------------------------------------------|
| 11 | 63854631 | 63855073 | KD2-H4K8ac_peak_5473 | 5.25269  |                                                        |
| 11 | 63855679 | 63855957 | KD2-H4K8ac_peak_5474 | 8.55581  |                                                        |
| 11 | 63856358 | 63856734 | KD2-H4K8ac_peak_5475 | 9.1707   |                                                        |
| 11 | 63858217 | 63858453 | KD2-H4K8ac_peak_5476 | 6.65673  |                                                        |
| 11 | 63863255 | 63864799 | KD2-H4K8ac_peak_5477 | 9.36516  |                                                        |
| 11 | 63869064 | 63869486 | KD2-H4K8ac_peak_5478 | 5.30799  |                                                        |
| 11 | 63869744 | 63870158 | KD2-H4K8ac_peak_5479 | 6.29509  | FLRT1_ENSG00000126500                                  |
| 11 | 63871124 | 63871383 | KD2-H4K8ac_peak_5480 | 9.80315  | FLRT1_ENSG00000126500                                  |
| 11 | 63900343 | 63900854 | KD2-H4K8ac_peak_5481 | 9.74423  |                                                        |
| 11 | 63911594 | 63911826 | KD2-H4K8ac_peak_5482 | 7.1733   |                                                        |
| 11 | 63912413 | 63913524 | KD2-H4K8ac_peak_5483 | 7.07117  |                                                        |
| 11 | 63915536 | 63915747 | KD2-H4K8ac_peak_5484 | 7.45629  |                                                        |
| 11 | 63917025 | 63917285 | KD2-H4K8ac_peak_5485 | 6.27245  |                                                        |
| 11 | 63932744 | 63934188 | KD2-H4K8ac_peak_5486 | 17.70889 | MACROD1_ENSG00000133315                                |
| 11 | 63952539 | 63953082 | KD2-H4K8ac_peak_5487 | 6.65673  | STIP1_ENSG00000168439                                  |
| 11 | 63953906 | 63954243 | KD2-H4K8ac_peak_5488 | 4.71229  |                                                        |
| 11 | 63993306 | 63993564 | KD2-H4K8ac_peak_5489 | 6.84261  | TRPT1_ENSG00000149743;NUDT22_ENSG00000149761           |
| 11 | 63993815 | 63994083 | KD2-H4K8ac_peak_5490 | 12.93007 | TRPT1_ENSG00000149743;NUDT22_ENSG00000149761           |
| 11 | 64001532 | 64001778 | KD2-H4K8ac_peak_5491 | 7.27716  | RP11-783K16.14_ENSG00000256116;VEGFB_ENSG00000173511   |
| 11 | 64002235 | 64002836 | KD2-H4K8ac_peak_5492 | 15.93117 | RP11-783K16.14_ENSG00000256116;VEGFB_ENSG00000173511   |
| 11 | 64007886 | 64008737 | KD2-H4K8ac_peak_5493 | 16.54162 | FKBP2_ENSG00000173486                                  |
| 11 | 64009202 | 64009867 | KD2-H4K8ac_peak_5494 | 10.43145 | FKBP2_ENSG00000173486                                  |
| 11 | 64013817 | 64014276 | KD2-H4K8ac_peak_5495 | 15.08752 | PPP1R14B_ENSG00000173457;RP11-783K16.5_ENSG00000256940 |
| 11 | 64015096 | 64015387 | KD2-H4K8ac_peak_5496 | 11.55418 | PPP1R14B_ENSG00000173457                               |
| 11 | 64015861 | 64016210 | KD2-H4K8ac_peak_5497 | 5.75452  | RP11-783K16.13_ENSG00000257086                         |
| 11 | 64017865 | 64019468 | KD2-H4K8ac_peak_5498 | 11.22681 | RP11-783K16.13_ENSG00000257086;PLCB3_ENSG00000149782   |
| 11 | 64035749 | 64037362 | KD2-H4K8ac_peak_5499 | 11.05467 | GPR137_ENSG00000173264                                 |
| 11 | 64037702 | 64038296 | KD2-H4K8ac_peak_5500 | 9.63487  | GPR137_ENSG00000173264                                 |
| 11 | 64038967 | 64039562 | KD2-H4K8ac_peak_5501 | 13.95627 |                                                        |
| 11 | 64051618 | 64052131 | KD2-H4K8ac_peak_5502 | 14.22723 | BAD_ENSG00000002330                                    |
| 11 | 64052452 | 64052862 | KD2-H4K8ac_peak_5503 | 11.24702 | BAD_ENSG00000002330                                    |
| 11 | 64053463 | 64053760 | KD2-H4K8ac_peak_5504 | 10.74343 |                                                        |
| 11 | 64072031 | 64072440 | KD2-H4K8ac_peak_5505 | 9.70019  | ESRRA_ENSG00000173153                                  |
| 11 | 64073720 | 64073973 | KD2-H4K8ac_peak_5506 | 4.22101  | ESRRA_ENSG00000173153                                  |
| 11 | 64084392 | 64084913 | KD2-H4K8ac_peak_5507 | 12.99417 | TRMT112_ENSG00000173113;PRDX5_ENSG00000126432          |
| 11 | 64085162 | 64085368 | KD2-H4K8ac_peak_5508 | 4.54006  | TRMT112_ENSG00000173113;PRDX5_ENSG00000126432          |
| 11 | 64085703 | 64086248 | KD2-H4K8ac_peak_5509 | 10.5847  | TRMT112_ENSG00000173113;PRDX5_ENSG00000126432          |
| 11 | 64122769 | 64123057 | KD2-H4K8ac_peak_5510 | 9.36516  |                                                        |
| 11 | 64125992 | 64127042 | KD2-H4K8ac_peak_5511 | 11.44756 | RPS6KA4_ENSG00000162302                                |
| 11 | 64140705 | 64141056 | KD2-H4K8ac_peak_5512 | 5.14125  |                                                        |
| 11 | 64215860 | 64216090 | KD2-H4K8ac_peak_5513 | 6.39197  | AP003774.4_ENSG00000181908                             |
| 11 | 64216600 | 64216898 | KD2-H4K8ac_peak_5514 | 7.74292  | AP003774.4_ENSG00000181908                             |
| 11 | 64258335 | 64258556 | KD2-H4K8ac_peak_5515 | 5.57044  |                                                        |
| 11 | 64333967 | 64335554 | KD2-H4K8ac_peak_5516 | 12.84642 |                                                        |
| 11 | 64336205 | 64336448 | KD2-H4K8ac_peak_5517 | 3.72574  |                                                        |
| 11 | 64388526 | 64388859 | KD2-H4K8ac_peak_5518 | 7.51945  |                                                        |

|    |          |          |                      |          |                                                    |
|----|----------|----------|----------------------|----------|----------------------------------------------------|
| 11 | 64404514 | 64404719 | KD2-H4K8ac_peak_5519 | 4.42765  |                                                    |
| 11 | 64405250 | 64405804 | KD2-H4K8ac_peak_5520 | 12.08081 |                                                    |
| 11 | 64455585 | 64455898 | KD2-H4K8ac_peak_5521 | 9.51625  |                                                    |
| 11 | 64462590 | 64462834 | KD2-H4K8ac_peak_5522 | 6.25869  |                                                    |
| 11 | 64490778 | 64491786 | KD2-H4K8ac_peak_5523 | 20.02161 | NRXN2_ENSG00000110076                              |
| 11 | 64497600 | 64497851 | KD2-H4K8ac_peak_5524 | 5.20908  |                                                    |
| 11 | 64511819 | 64512242 | KD2-H4K8ac_peak_5525 | 6.85193  | RASGRP2_ENSG00000068831                            |
| 11 | 64512499 | 64512807 | KD2-H4K8ac_peak_5526 | 6.66359  | RASGRP2_ENSG00000068831                            |
| 11 | 64513027 | 64513519 | KD2-H4K8ac_peak_5527 | 8.88082  | RASGRP2_ENSG00000068831                            |
| 11 | 64545346 | 64546057 | KD2-H4K8ac_peak_5528 | 16.64426 | SF1_ENSG00000168066;AP001462.6_ENSG00000269038     |
| 11 | 64546943 | 64547217 | KD2-H4K8ac_peak_5529 | 7.76329  | SF1_ENSG00000168066;AP001462.6_ENSG00000269038     |
| 11 | 64571347 | 64571584 | KD2-H4K8ac_peak_5530 | 4.87807  | MAP4K2_ENSG00000168067                             |
| 11 | 64578394 | 64578597 | KD2-H4K8ac_peak_5531 | 5.82799  | MEN1_ENSG00000133895                               |
| 11 | 64611932 | 64612543 | KD2-H4K8ac_peak_5532 | 11.09936 | CDC42BPG_ENSG00000171219                           |
| 11 | 64624173 | 64624453 | KD2-H4K8ac_peak_5533 | 5.08628  |                                                    |
| 11 | 64646377 | 64646867 | KD2-H4K8ac_peak_5534 | 6.78242  |                                                    |
| 11 | 64655261 | 64655462 | KD2-H4K8ac_peak_5535 | 11.22681 | EHD1_ENSG00000110047                               |
| 11 | 64655689 | 64655887 | KD2-H4K8ac_peak_5536 | 4.86324  | EHD1_ENSG00000110047                               |
| 11 | 64684229 | 64684585 | KD2-H4K8ac_peak_5537 | 6.25869  | ATG2A_ENSG00000110046;PPP2R5B_ENSG00000068971      |
| 11 | 64690699 | 64691531 | KD2-H4K8ac_peak_5538 | 6.40297  |                                                    |
| 11 | 64691772 | 64692052 | KD2-H4K8ac_peak_5539 | 14.68449 |                                                    |
| 11 | 64692280 | 64692632 | KD2-H4K8ac_peak_5540 | 5.81222  |                                                    |
| 11 | 64781195 | 64782446 | KD2-H4K8ac_peak_5541 | 20.5798  | ARL2_ENSG00000213465;RP11-399J13.3_ENSG00000273003 |
| 11 | 64851035 | 64851462 | KD2-H4K8ac_peak_5542 | 7.36799  | CDCA5_ENSG00000146670;ZFPL1_ENSG00000162300        |
| 11 | 64852037 | 64852287 | KD2-H4K8ac_peak_5543 | 6.99815  | CDCA5_ENSG00000146670;ZFPL1_ENSG00000162300        |
| 11 | 64863078 | 64863946 | KD2-H4K8ac_peak_5544 | 17.55491 |                                                    |
| 11 | 64879428 | 64880768 | KD2-H4K8ac_peak_5545 | 16.49944 | AP003068.9_ENSG00000254501;TM7SF2_ENSG00000149809  |
| 11 | 64883964 | 64885056 | KD2-H4K8ac_peak_5546 | 15.81711 | ZNHIT2_ENSG00000174276;AP003068.12_ENSG00000255173 |
| 11 | 64901463 | 64902477 | KD2-H4K8ac_peak_5547 | 5.75757  | SYVN1_ENSG00000162298                              |
| 11 | 64902732 | 64902941 | KD2-H4K8ac_peak_5548 | 4.211    | SYVN1_ENSG00000162298                              |
| 11 | 64903353 | 64903641 | KD2-H4K8ac_peak_5549 | 5.54647  |                                                    |
| 11 | 64917836 | 64918891 | KD2-H4K8ac_peak_5550 | 11.92978 |                                                    |
| 11 | 64948264 | 64949088 | KD2-H4K8ac_peak_5551 | 11.79585 | AP003068.23_ENSG00000254614;CAPN1_ENSG00000014216  |
| 11 | 64949421 | 64949827 | KD2-H4K8ac_peak_5552 | 12.08081 | AP003068.23_ENSG00000254614                        |
| 11 | 64992526 | 64993788 | KD2-H4K8ac_peak_5553 | 10.30284 |                                                    |
| 11 | 65057175 | 65057597 | KD2-H4K8ac_peak_5554 | 7.58939  |                                                    |
| 11 | 65100713 | 65101144 | KD2-H4K8ac_peak_5555 | 15.61313 | DPF2_ENSG00000133884                               |
| 11 | 65101471 | 65101706 | KD2-H4K8ac_peak_5556 | 9.18237  | DPF2_ENSG00000133884                               |
| 11 | 65121575 | 65121986 | KD2-H4K8ac_peak_5557 | 7.40314  | TIGD3_ENSG00000173825                              |
| 11 | 65122316 | 65122510 | KD2-H4K8ac_peak_5558 | 6.45083  | TIGD3_ENSG00000173825                              |
| 11 | 65144804 | 65145037 | KD2-H4K8ac_peak_5559 | 5.65802  |                                                    |
| 11 | 65149200 | 65150062 | KD2-H4K8ac_peak_5560 | 3.82395  |                                                    |
| 11 | 65150374 | 65150895 | KD2-H4K8ac_peak_5561 | 10.53377 | SLC25A45_ENSG00000162241                           |
| 11 | 65153557 | 65153984 | KD2-H4K8ac_peak_5562 | 7.76104  | FRMD8_ENSG00000126391                              |
| 11 | 65183460 | 65183940 | KD2-H4K8ac_peak_5563 | 6.9556   |                                                    |
| 11 | 65185998 | 65187159 | KD2-H4K8ac_peak_5564 | 16.34834 |                                                    |

|    |          |          |                      |          |                                                   |
|----|----------|----------|----------------------|----------|---------------------------------------------------|
| 11 | 65189425 | 65189706 | KD2-H4K8ac_peak_5565 | 8.52559  | NEAT1_ENSG00000245532                             |
| 11 | 65220546 | 65220756 | KD2-H4K8ac_peak_5566 | 8.44476  |                                                   |
| 11 | 65222248 | 65222637 | KD2-H4K8ac_peak_5567 | 10.17486 | AP000769.1_ENSG00000173727                        |
| 11 | 65244432 | 65244916 | KD2-H4K8ac_peak_5568 | 10.43145 |                                                   |
| 11 | 65245193 | 65245456 | KD2-H4K8ac_peak_5569 | 8.86099  |                                                   |
| 11 | 65253612 | 65253807 | KD2-H4K8ac_peak_5570 | 5.82799  |                                                   |
| 11 | 65254517 | 65254780 | KD2-H4K8ac_peak_5571 | 8.17557  |                                                   |
| 11 | 65255529 | 65255867 | KD2-H4K8ac_peak_5572 | 5.01002  |                                                   |
| 11 | 65256350 | 65256978 | KD2-H4K8ac_peak_5573 | 9.59905  |                                                   |
| 11 | 65264446 | 65264647 | KD2-H4K8ac_peak_5574 | 8.79106  | MALAT1_ENSG00000251562                            |
| 11 | 65265279 | 65266365 | KD2-H4K8ac_peak_5575 | 17.8868  | MALAT1_ENSG00000251562;AP000769.7_ENSG00000270117 |
| 11 | 65324911 | 65325157 | KD2-H4K8ac_peak_5576 | 12.99417 |                                                   |
| 11 | 65325385 | 65325794 | KD2-H4K8ac_peak_5577 | 13.58431 | LTBP3_ENSG00000168056                             |
| 11 | 65326063 | 65326897 | KD2-H4K8ac_peak_5578 | 10.77651 | LTBP3_ENSG00000168056                             |
| 11 | 65327431 | 65328124 | KD2-H4K8ac_peak_5579 | 9.89126  |                                                   |
| 11 | 65328603 | 65328857 | KD2-H4K8ac_peak_5580 | 7.45501  |                                                   |
| 11 | 65337246 | 65337777 | KD2-H4K8ac_peak_5581 | 7.36799  | SSSCA1-AS1_ENSG00000260233;SSSCA1_ENSG00000173465 |
| 11 | 65338105 | 65338350 | KD2-H4K8ac_peak_5582 | 7.07117  | SSSCA1-AS1_ENSG00000260233;SSSCA1_ENSG00000173465 |
| 11 | 65343541 | 65344042 | KD2-H4K8ac_peak_5583 | 9.07715  | EHBP1L1_ENSG00000173442                           |
| 11 | 65381203 | 65382048 | KD2-H4K8ac_peak_5584 | 11.03331 | MAP3K11_ENSG00000173327                           |
| 11 | 65383309 | 65383555 | KD2-H4K8ac_peak_5585 | 14.78033 | MAP3K11_ENSG00000173327;PCNXL3_ENSG00000197136    |
| 11 | 65405700 | 65406137 | KD2-H4K8ac_peak_5586 | 6.97919  | SIPA1_ENSG00000213445                             |
| 11 | 65414407 | 65415176 | KD2-H4K8ac_peak_5587 | 8.04448  |                                                   |
| 11 | 65420165 | 65420396 | KD2-H4K8ac_peak_5588 | 9.95119  |                                                   |
| 11 | 65420668 | 65421522 | KD2-H4K8ac_peak_5589 | 14.4458  |                                                   |
| 11 | 65430833 | 65431170 | KD2-H4K8ac_peak_5590 | 9.36516  | RELA_ENSG00000173039                              |
| 11 | 65478096 | 65478360 | KD2-H4K8ac_peak_5591 | 4.82979  |                                                   |
| 11 | 65479499 | 65479916 | KD2-H4K8ac_peak_5592 | 8.4716   | KAT5_ENSG00000172977                              |
| 11 | 65487923 | 65488241 | KD2-H4K8ac_peak_5593 | 9.34195  | RNASEH2C_ENSG00000172922                          |
| 11 | 65488638 | 65488888 | KD2-H4K8ac_peak_5594 | 7.26029  | RNASEH2C_ENSG00000172922                          |
| 11 | 65548534 | 65549283 | KD2-H4K8ac_peak_5595 | 29.70907 | AP5B1_ENSG00000254470                             |
| 11 | 65585308 | 65585660 | KD2-H4K8ac_peak_5596 | 9.1707   |                                                   |
| 11 | 65600531 | 65601336 | KD2-H4K8ac_peak_5597 | 9.95119  | SNX32_ENSG00000172803                             |
| 11 | 65624982 | 65625644 | KD2-H4K8ac_peak_5598 | 15.57998 | MUS81_ENSG00000172732                             |
| 11 | 65627186 | 65627683 | KD2-H4K8ac_peak_5599 | 5.01002  |                                                   |
| 11 | 65628041 | 65628438 | KD2-H4K8ac_peak_5600 | 12.13241 |                                                   |
| 11 | 65639449 | 65640406 | KD2-H4K8ac_peak_5601 | 15.81711 | EFEMP2_ENSG00000172638                            |
| 11 | 65640705 | 65640910 | KD2-H4K8ac_peak_5602 | 4.06758  | EFEMP2_ENSG00000172638                            |
| 11 | 65641311 | 65641668 | KD2-H4K8ac_peak_5603 | 4.67342  | EFEMP2_ENSG00000172638                            |
| 11 | 65656144 | 65656418 | KD2-H4K8ac_peak_5604 | 20.17563 | FIBP_ENSG00000172500                              |
| 11 | 65656920 | 65657150 | KD2-H4K8ac_peak_5605 | 7.40111  | FIBP_ENSG00000172500;CCDC85B_ENSG00000175602      |
| 11 | 65660984 | 65661753 | KD2-H4K8ac_peak_5606 | 14.93459 |                                                   |
| 11 | 65667509 | 65667875 | KD2-H4K8ac_peak_5607 | 12.46946 | FOSL1_ENSG00000175592                             |
| 11 | 65679641 | 65679848 | KD2-H4K8ac_peak_5608 | 4.86324  |                                                   |
| 11 | 65685942 | 65686459 | KD2-H4K8ac_peak_5609 | 18.7894  | C11orf68_ENSG00000175573;DRAP1_ENSG00000175550    |
| 11 | 65720842 | 65721218 | KD2-H4K8ac_peak_5610 | 6.99815  |                                                   |

|    |          |          |                      |          |                                                                                                |
|----|----------|----------|----------------------|----------|------------------------------------------------------------------------------------------------|
| 11 | 65728167 | 65728937 | KD2-H4K8ac_peak_5611 | 11.92978 | SART1_ENSG00000175467                                                                          |
| 11 | 65729220 | 65729513 | KD2-H4K8ac_peak_5612 | 9.65086  | SART1_ENSG00000175467                                                                          |
| 11 | 65789822 | 65790518 | KD2-H4K8ac_peak_5613 | 7.76329  |                                                                                                |
| 11 | 65816231 | 65816590 | KD2-H4K8ac_peak_5614 | 9.1994   | GAL3ST3_ENSG00000175229                                                                        |
| 11 | 65818665 | 65819527 | KD2-H4K8ac_peak_5615 | 12.13241 | SF3B2_ENSG00000087365                                                                          |
| 11 | 65819902 | 65820102 | KD2-H4K8ac_peak_5616 | 7.0754   | snoU13_ENSG00000238752                                                                         |
| 11 | 65837795 | 65838344 | KD2-H4K8ac_peak_5617 | 12.84642 | RP11-1167A19.2_ENSG00000255038;PACS1_ENSG00000175115                                           |
| 11 | 65885861 | 65886098 | KD2-H4K8ac_peak_5618 | 10.1591  |                                                                                                |
| 11 | 65886401 | 65886655 | KD2-H4K8ac_peak_5619 | 4.42765  |                                                                                                |
| 11 | 65887279 | 65887482 | KD2-H4K8ac_peak_5620 | 9.11031  |                                                                                                |
| 11 | 66024657 | 66025050 | KD2-H4K8ac_peak_5621 | 6.40297  | KLC2_ENSG00000174996                                                                           |
| 11 | 66035313 | 66035661 | KD2-H4K8ac_peak_5622 | 6.55628  | RP11-867G23.2_ENSG00000254762;RAB1B_ENSG00000174903                                            |
| 11 | 66036081 | 66036701 | KD2-H4K8ac_peak_5623 | 12.93253 | RP11-867G23.2_ENSG00000254762;RAB1B_ENSG00000174903                                            |
| 11 | 66045092 | 66046237 | KD2-H4K8ac_peak_5624 | 11.89502 | RP11-867G23.3_ENSG00000245156;RP11-867G23.4_ENSG00000254452;CNIH2_ENSG00000174871              |
| 11 | 66056183 | 66056553 | KD2-H4K8ac_peak_5625 | 14.00658 | YIF1A_ENSG00000174851                                                                          |
| 11 | 66058833 | 66059184 | KD2-H4K8ac_peak_5626 | 5.88845  | TMEM151A_ENSG00000179292                                                                       |
| 11 | 66059465 | 66060003 | KD2-H4K8ac_peak_5627 | 9.1707   | TMEM151A_ENSG00000179292                                                                       |
| 11 | 66079132 | 66079598 | KD2-H4K8ac_peak_5628 | 5.88845  | RP11-867G23.13_ENSG00000254458                                                                 |
| 11 | 66080665 | 66082543 | KD2-H4K8ac_peak_5629 | 14.08365 | RP11-867G23.13_ENSG00000254458                                                                 |
| 11 | 66084193 | 66086290 | KD2-H4K8ac_peak_5630 | 17.83665 | CD248_ENSG00000174807                                                                          |
| 11 | 66093761 | 66094122 | KD2-H4K8ac_peak_5631 | 6.25869  |                                                                                                |
| 11 | 66096094 | 66096413 | KD2-H4K8ac_peak_5632 | 14.67919 |                                                                                                |
| 11 | 66103922 | 66104184 | KD2-H4K8ac_peak_5633 | 6.25869  | RIN1_ENSG00000174791                                                                           |
| 11 | 66112105 | 66112483 | KD2-H4K8ac_peak_5634 | 4.54006  | BRMS1_ENSG00000174744                                                                          |
| 11 | 66114500 | 66114971 | KD2-H4K8ac_peak_5635 | 4.04573  | B3GNT1_ENSG00000174684;RP11-867G23.8_ENSG00000255468                                           |
| 11 | 66115868 | 66116070 | KD2-H4K8ac_peak_5636 | 8.09303  | B3GNT1_ENSG00000174684;RP11-867G23.8_ENSG00000255468                                           |
| 11 | 66138471 | 66139583 | KD2-H4K8ac_peak_5637 | 13.81781 | SLC29A2_ENSG00000174669                                                                        |
| 11 | 66205829 | 66206282 | KD2-H4K8ac_peak_5638 | 13.80019 |                                                                                                |
| 11 | 66233889 | 66234133 | KD2-H4K8ac_peak_5639 | 5.9696   | MRPL11_ENSG00000174547;PELI3_ENSG00000174516                                                   |
| 11 | 66247082 | 66247598 | KD2-H4K8ac_peak_5640 | 5.4779   | CTD-3074O7.5_ENSG00000255517;DPP3_ENSG00000254986                                              |
| 11 | 66248021 | 66248282 | KD2-H4K8ac_peak_5641 | 8.55271  | CTD-3074O7.5_ENSG00000255517;DPP3_ENSG00000254986                                              |
| 11 | 66277665 | 66278005 | KD2-H4K8ac_peak_5642 | 9.11031  | BBS1_ENSG00000174483                                                                           |
| 11 | 66278272 | 66278566 | KD2-H4K8ac_peak_5643 | 7.59643  | BBS1_ENSG00000174483                                                                           |
| 11 | 66313212 | 66313437 | KD2-H4K8ac_peak_5644 | 6.66359  | ZDHHC24_ENSG00000174165;ACTN3_ENSG00000248746                                                  |
| 11 | 66335792 | 66336391 | KD2-H4K8ac_peak_5645 | 13.81781 | CTSF_ENSG00000174080                                                                           |
| 11 | 66360692 | 66360898 | KD2-H4K8ac_peak_5646 | 5.54647  | CCDC87_ENSG00000182791;CCS_ENSG00000173992                                                     |
| 11 | 66383008 | 66383795 | KD2-H4K8ac_peak_5647 | 6.99815  | RNU4-39P_ENSG00000199325;RBM14_ENSG00000239306;RBM4_ENSG00000173933;RBM14-RBM4_ENSG00000248643 |
| 11 | 66444873 | 66445195 | KD2-H4K8ac_peak_5648 | 6.40297  | RBM4B_ENSG00000173914                                                                          |
| 11 | 66494726 | 66495606 | KD2-H4K8ac_peak_5649 | 9.95119  |                                                                                                |
| 11 | 66495905 | 66496364 | KD2-H4K8ac_peak_5650 | 19.72117 | SPTBN2_ENSG00000173898                                                                         |
| 11 | 66511861 | 66512124 | KD2-H4K8ac_peak_5651 | 8.79106  | C11orf80_ENSG00000173715                                                                       |
| 11 | 66512352 | 66512684 | KD2-H4K8ac_peak_5652 | 10.19949 | C11orf80_ENSG00000173715                                                                       |
| 11 | 66610008 | 66611469 | KD2-H4K8ac_peak_5653 | 12.82393 | RCE1_ENSG00000173653                                                                           |
| 11 | 66623051 | 66623781 | KD2-H4K8ac_peak_5654 | 8.10216  | LRFN4_ENSG00000173621                                                                          |
| 11 | 66624070 | 66624990 | KD2-H4K8ac_peak_5655 | 9.65086  | LRFN4_ENSG00000173621                                                                          |
| 11 | 66741882 | 66742173 | KD2-H4K8ac_peak_5656 | 6.31143  | C11orf86_ENSG00000173237                                                                       |

|    |          |          |                      |          |                                                                                |
|----|----------|----------|----------------------|----------|--------------------------------------------------------------------------------|
| 11 | 66742722 | 66742919 | KD2-H4K8ac_peak_5657 | 6.4095   | C11orf86_ENSG00000173237                                                       |
| 11 | 66838952 | 66839234 | KD2-H4K8ac_peak_5658 | 5.54647  |                                                                                |
| 11 | 66883018 | 66883249 | KD2-H4K8ac_peak_5659 | 4.56666  |                                                                                |
| 11 | 66885748 | 66886202 | KD2-H4K8ac_peak_5660 | 9.36516  | KDM2A_ENSG00000173120                                                          |
| 11 | 66886767 | 66887172 | KD2-H4K8ac_peak_5661 | 13.73635 | KDM2A_ENSG00000173120                                                          |
| 11 | 67028643 | 67029951 | KD2-H4K8ac_peak_5662 | 15.16343 |                                                                                |
| 11 | 67030377 | 67030868 | KD2-H4K8ac_peak_5663 | 10.05606 |                                                                                |
| 11 | 67033438 | 67033693 | KD2-H4K8ac_peak_5664 | 5.57044  | ADRBK1_ENSG00000173020                                                         |
| 11 | 67034227 | 67034658 | KD2-H4K8ac_peak_5665 | 9.16531  | ADRBK1_ENSG00000173020                                                         |
| 11 | 67055043 | 67055759 | KD2-H4K8ac_peak_5666 | 8.53092  | ANKRD13D_ENSG00000172932                                                       |
| 11 | 67056047 | 67056377 | KD2-H4K8ac_peak_5667 | 10.66719 | ANKRD13D_ENSG00000172932                                                       |
| 11 | 67070587 | 67072064 | KD2-H4K8ac_peak_5668 | 16.29614 | SSH3_ENSG00000172830                                                           |
| 11 | 67084108 | 67085232 | KD2-H4K8ac_peak_5669 | 13.36684 |                                                                                |
| 11 | 67120524 | 67121000 | KD2-H4K8ac_peak_5670 | 10.19949 |                                                                                |
| 11 | 67124014 | 67124333 | KD2-H4K8ac_peak_5671 | 8.30974  | POLD4_ENSG00000175482                                                          |
| 11 | 67139787 | 67140026 | KD2-H4K8ac_peak_5672 | 4.52514  |                                                                                |
| 11 | 67140659 | 67140913 | KD2-H4K8ac_peak_5673 | 5.30799  | AP003419.11_ENSG00000256514;CLCF1_ENSG00000175505                              |
| 11 | 67168716 | 67169257 | KD2-H4K8ac_peak_5674 | 13.73635 |                                                                                |
| 11 | 67169609 | 67170113 | KD2-H4K8ac_peak_5675 | 7.76329  |                                                                                |
| 11 | 67183164 | 67183390 | KD2-H4K8ac_peak_5676 | 8.17902  | CARNS1_ENSG00000172508                                                         |
| 11 | 67188254 | 67188592 | KD2-H4K8ac_peak_5677 | 6.67092  | PPP1CA_ENSG00000172531                                                         |
| 11 | 67195391 | 67195795 | KD2-H4K8ac_peak_5678 | 16.57619 | RPS6KB2_ENSG00000175634                                                        |
| 11 | 67195993 | 67196195 | KD2-H4K8ac_peak_5679 | 8.83582  | RPS6KB2_ENSG00000175634                                                        |
| 11 | 67231513 | 67232692 | KD2-H4K8ac_peak_5680 | 15.08751 |                                                                                |
| 11 | 67236305 | 67236600 | KD2-H4K8ac_peak_5681 | 8.55271  | TMEM134_ENSG00000172663                                                        |
| 11 | 67236884 | 67237141 | KD2-H4K8ac_peak_5682 | 12.84642 | TMEM134_ENSG00000172663                                                        |
| 11 | 67250640 | 67251275 | KD2-H4K8ac_peak_5683 | 3.86308  | AIP_ENSG00000110711                                                            |
| 11 | 67272624 | 67272844 | KD2-H4K8ac_peak_5684 | 6.65673  | PITPNM1_ENSG00000110697                                                        |
| 11 | 67274998 | 67275588 | KD2-H4K8ac_peak_5685 | 14.66631 | CDK2AP2_ENSG00000167797                                                        |
| 11 | 67275928 | 67276445 | KD2-H4K8ac_peak_5686 | 15.81711 | CDK2AP2_ENSG00000167797                                                        |
| 11 | 67350429 | 67350720 | KD2-H4K8ac_peak_5687 | 12.78794 | GSTP1_ENSG00000084207                                                          |
| 11 | 67351090 | 67352051 | KD2-H4K8ac_peak_5688 | 18.05501 | GSTP1_ENSG00000084207                                                          |
| 11 | 67373606 | 67374178 | KD2-H4K8ac_peak_5689 | 9.15329  | C11orf72_ENSG00000184224;RP11-655M14.12_ENSG00000255119;NDUFV1_ENSG00000167792 |
| 11 | 67374496 | 67375151 | KD2-H4K8ac_peak_5690 | 7.47462  | C11orf72_ENSG00000184224;NDUFV1_ENSG00000167792                                |
| 11 | 67396533 | 67397238 | KD2-H4K8ac_peak_5691 | 8.4716   | NUDT8_ENSG00000167799                                                          |
| 11 | 67398037 | 67398267 | KD2-H4K8ac_peak_5692 | 5.75757  | NUDT8_ENSG00000167799                                                          |
| 11 | 67573619 | 67573958 | KD2-H4K8ac_peak_5693 | 8.17902  | FAM86C2P_ENSG00000160172                                                       |
| 11 | 67593366 | 67593676 | KD2-H4K8ac_peak_5694 | 9.34989  |                                                                                |
| 11 | 67770978 | 67772359 | KD2-H4K8ac_peak_5695 | 16.61426 | UNC93B1_ENSG00000110057                                                        |
| 11 | 67777478 | 67777954 | KD2-H4K8ac_peak_5696 | 9.08816  |                                                                                |
| 11 | 67797105 | 67797368 | KD2-H4K8ac_peak_5697 | 9.06369  | NDUFS8_ENSG00000110717;RP5-901A4.1_ENSG00000255306                             |
| 11 | 67798170 | 67798503 | KD2-H4K8ac_peak_5698 | 10.35678 | NDUFS8_ENSG00000110717;RP5-901A4.1_ENSG00000255306                             |
| 11 | 67807638 | 67808712 | KD2-H4K8ac_peak_5699 | 12.00597 |                                                                                |
| 11 | 67889132 | 67889826 | KD2-H4K8ac_peak_5700 | 17.75427 | CHKA_ENSG00000110721;CTD-2655K5.1_ENSG00000255236                              |
| 11 | 67980902 | 67982144 | KD2-H4K8ac_peak_5701 | 29.97849 | SUV420H1_ENSG00000110066                                                       |
| 11 | 67982418 | 67982613 | KD2-H4K8ac_peak_5702 | 6.31143  |                                                                                |



|    |          |          |                      |          |                                                |
|----|----------|----------|----------------------|----------|------------------------------------------------|
| 11 | 68025171 | 68025460 | KD2-H4K8ac_peak_5703 | 5.85291  |                                                |
| 11 | 68039027 | 68039311 | KD2-H4K8ac_peak_5704 | 6.90231  | C11orf24_ENSG00000171067                       |
| 11 | 68039674 | 68039984 | KD2-H4K8ac_peak_5705 | 6.40874  | C11orf24_ENSG00000171067                       |
| 11 | 68064974 | 68065357 | KD2-H4K8ac_peak_5706 | 7.76329  |                                                |
| 11 | 68079250 | 68080645 | KD2-H4K8ac_peak_5707 | 14.93224 | LRP5_ENSG00000162337                           |
| 11 | 68080884 | 68081085 | KD2-H4K8ac_peak_5708 | 4.06758  | LRP5_ENSG00000162337                           |
| 11 | 68081902 | 68082258 | KD2-H4K8ac_peak_5709 | 4.77079  |                                                |
| 11 | 68093810 | 68094013 | KD2-H4K8ac_peak_5710 | 4.38478  |                                                |
| 11 | 68095585 | 68096071 | KD2-H4K8ac_peak_5711 | 6.58902  |                                                |
| 11 | 68137801 | 68138201 | KD2-H4K8ac_peak_5712 | 4.56666  |                                                |
| 11 | 68138653 | 68138865 | KD2-H4K8ac_peak_5713 | 6.60096  |                                                |
| 11 | 68140386 | 68141043 | KD2-H4K8ac_peak_5714 | 17.55491 |                                                |
| 11 | 68141305 | 68141833 | KD2-H4K8ac_peak_5715 | 15.31552 |                                                |
| 11 | 68142318 | 68142868 | KD2-H4K8ac_peak_5716 | 9.96798  |                                                |
| 11 | 68207763 | 68208303 | KD2-H4K8ac_peak_5717 | 9.89126  |                                                |
| 11 | 68208733 | 68208962 | KD2-H4K8ac_peak_5718 | 8.4716   |                                                |
| 11 | 68424784 | 68425080 | KD2-H4K8ac_peak_5719 | 7.47462  |                                                |
| 11 | 68425600 | 68425983 | KD2-H4K8ac_peak_5720 | 8.93255  |                                                |
| 11 | 68426248 | 68426448 | KD2-H4K8ac_peak_5721 | 8.36514  |                                                |
| 11 | 68427013 | 68428073 | KD2-H4K8ac_peak_5722 | 11.90231 |                                                |
| 11 | 68428601 | 68429526 | KD2-H4K8ac_peak_5723 | 8.36432  |                                                |
| 11 | 68430886 | 68431314 | KD2-H4K8ac_peak_5724 | 6.05809  |                                                |
| 11 | 68445420 | 68445655 | KD2-H4K8ac_peak_5725 | 5.88845  |                                                |
| 11 | 68451581 | 68452388 | KD2-H4K8ac_peak_5726 | 18.64825 | GAL_ENSG00000069482                            |
| 11 | 68518673 | 68518983 | KD2-H4K8ac_peak_5727 | 16.8435  | MTL5_ENSG00000132749                           |
| 11 | 68608189 | 68609088 | KD2-H4K8ac_peak_5728 | 12.57143 |                                                |
| 11 | 68622197 | 68623330 | KD2-H4K8ac_peak_5729 | 15.69572 |                                                |
| 11 | 68657719 | 68658219 | KD2-H4K8ac_peak_5730 | 4.06758  |                                                |
| 11 | 68671446 | 68672135 | KD2-H4K8ac_peak_5731 | 6.84261  | MRPL21_ENSG00000197345;IGHMBP2_ENSG00000132740 |
| 11 | 68761813 | 68762102 | KD2-H4K8ac_peak_5732 | 4.97693  |                                                |
| 11 | 68768982 | 68769189 | KD2-H4K8ac_peak_5733 | 5.97274  | RP11-554A11.4_ENSG00000261625                  |
| 11 | 68781168 | 68782705 | KD2-H4K8ac_peak_5734 | 14.48084 | MRGPRF_ENSG00000172935                         |
| 11 | 68816411 | 68816999 | KD2-H4K8ac_peak_5735 | 22.21705 | TPCN2_ENSG00000162341                          |
| 11 | 68872811 | 68873335 | KD2-H4K8ac_peak_5736 | 11.05467 |                                                |
| 11 | 68873870 | 68874425 | KD2-H4K8ac_peak_5737 | 5.38581  |                                                |
| 11 | 68883655 | 68883971 | KD2-H4K8ac_peak_5738 | 4.01115  |                                                |
| 11 | 68884468 | 68884660 | KD2-H4K8ac_peak_5739 | 5.43522  |                                                |
| 11 | 68891402 | 68891623 | KD2-H4K8ac_peak_5740 | 4.86324  |                                                |
| 11 | 68922631 | 68922832 | KD2-H4K8ac_peak_5741 | 6.36375  | RP11-554A11.9_ENSG00000259799                  |
| 11 | 68923179 | 68924839 | KD2-H4K8ac_peak_5742 | 20.46575 | RP11-554A11.9_ENSG00000259799                  |
| 11 | 68925037 | 68926211 | KD2-H4K8ac_peak_5743 | 12.40345 |                                                |
| 11 | 68946733 | 68947003 | KD2-H4K8ac_peak_5744 | 9.11031  |                                                |
| 11 | 68950585 | 68951384 | KD2-H4K8ac_peak_5745 | 11.94983 |                                                |
| 11 | 68953189 | 68953744 | KD2-H4K8ac_peak_5746 | 16.61426 |                                                |
| 11 | 68954677 | 68954911 | KD2-H4K8ac_peak_5747 | 12.57297 |                                                |
| 11 | 68955185 | 68955546 | KD2-H4K8ac_peak_5748 | 9.08816  |                                                |

|    |          |          |                      |          |                                                     |
|----|----------|----------|----------------------|----------|-----------------------------------------------------|
| 11 | 68960016 | 68960895 | KD2-H4K8ac_peak_5749 | 4.54006  |                                                     |
| 11 | 68967830 | 68968287 | KD2-H4K8ac_peak_5750 | 5.01002  |                                                     |
| 11 | 68979711 | 68980040 | KD2-H4K8ac_peak_5751 | 4.9025   |                                                     |
| 11 | 68985454 | 68986008 | KD2-H4K8ac_peak_5752 | 4.86324  |                                                     |
| 11 | 69064857 | 69065424 | KD2-H4K8ac_peak_5753 | 10.42398 |                                                     |
| 11 | 69189050 | 69189479 | KD2-H4K8ac_peak_5754 | 9.47671  |                                                     |
| 11 | 69195390 | 69196014 | KD2-H4K8ac_peak_5755 | 8.79106  |                                                     |
| 11 | 69257445 | 69258041 | KD2-H4K8ac_peak_5756 | 9.95119  |                                                     |
| 11 | 69258343 | 69259144 | KD2-H4K8ac_peak_5757 | 18.41623 | AP000439.2_ENSG00000255606                          |
| 11 | 69263373 | 69263606 | KD2-H4K8ac_peak_5758 | 4.04573  |                                                     |
| 11 | 69264495 | 69264741 | KD2-H4K8ac_peak_5759 | 8.53092  |                                                     |
| 11 | 69265020 | 69265286 | KD2-H4K8ac_peak_5760 | 8.78496  |                                                     |
| 11 | 69449011 | 69449856 | KD2-H4K8ac_peak_5761 | 14.81583 |                                                     |
| 11 | 69452667 | 69453692 | KD2-H4K8ac_peak_5762 | 13.9234  |                                                     |
| 11 | 69455078 | 69455657 | KD2-H4K8ac_peak_5763 | 8.02296  | CCND1_ENSG00000110092                               |
| 11 | 69456880 | 69457238 | KD2-H4K8ac_peak_5764 | 15.17328 |                                                     |
| 11 | 69457477 | 69458146 | KD2-H4K8ac_peak_5765 | 6.16103  |                                                     |
| 11 | 69459238 | 69459430 | KD2-H4K8ac_peak_5766 | 5.9696   |                                                     |
| 11 | 69489637 | 69490027 | KD2-H4K8ac_peak_5767 | 14.43704 | ORAOV1_ENSG00000149716                              |
| 11 | 69514075 | 69514278 | KD2-H4K8ac_peak_5768 | 6.82976  |                                                     |
| 11 | 69518538 | 69519227 | KD2-H4K8ac_peak_5769 | 10.74343 | FGF19_ENSG00000162344                               |
| 11 | 69707253 | 69708186 | KD2-H4K8ac_peak_5770 | 11.92978 |                                                     |
| 11 | 69708510 | 69708724 | KD2-H4K8ac_peak_5771 | 8.58069  |                                                     |
| 11 | 70048320 | 70049189 | KD2-H4K8ac_peak_5772 | 11.70505 | FADD_ENSG00000168040                                |
| 11 | 70049495 | 70049842 | KD2-H4K8ac_peak_5773 | 10.30284 | FADD_ENSG00000168040                                |
| 11 | 70116211 | 70116539 | KD2-H4K8ac_peak_5774 | 5.13615  | PPFIA1_ENSG00000131626                              |
| 11 | 70243868 | 70244228 | KD2-H4K8ac_peak_5775 | 4.68059  | AP000487.5_ENSG00000246889;CTTN_ENSG00000085733     |
| 11 | 70244651 | 70244993 | KD2-H4K8ac_peak_5776 | 12.23    | AP000487.5_ENSG00000246889;CTTN_ENSG00000085733     |
| 11 | 70457191 | 70457552 | KD2-H4K8ac_peak_5777 | 4.54838  |                                                     |
| 11 | 70508036 | 70508745 | KD2-H4K8ac_peak_5778 | 8.83582  |                                                     |
| 11 | 70601480 | 70601769 | KD2-H4K8ac_peak_5779 | 5.88845  |                                                     |
| 11 | 71158791 | 71159442 | KD2-H4K8ac_peak_5780 | 9.31907  | RP11-660L16.2_ENSG00000254682                       |
| 11 | 71159723 | 71160253 | KD2-H4K8ac_peak_5781 | 7.76329  | RP11-660L16.2_ENSG00000254682                       |
| 11 | 71199293 | 71199593 | KD2-H4K8ac_peak_5782 | 11.81257 |                                                     |
| 11 | 71211441 | 71211868 | KD2-H4K8ac_peak_5783 | 7.27716  |                                                     |
| 11 | 71476255 | 71476583 | KD2-H4K8ac_peak_5784 | 16.11042 |                                                     |
| 11 | 71493298 | 71493589 | KD2-H4K8ac_peak_5785 | 4.77079  |                                                     |
| 11 | 71497511 | 71497760 | KD2-H4K8ac_peak_5786 | 12.3187  | FAM86C1_ENSG00000158483                             |
| 11 | 71524452 | 71524860 | KD2-H4K8ac_peak_5787 | 17.55491 |                                                     |
| 11 | 71640152 | 71640361 | KD2-H4K8ac_peak_5788 | 7.47462  | RP11-849H4.2_ENSG00000254469;RNF121_ENSG00000137522 |
| 11 | 71749720 | 71749992 | KD2-H4K8ac_peak_5789 | 5.51783  |                                                     |
| 11 | 71750397 | 71751353 | KD2-H4K8ac_peak_5790 | 5.82799  |                                                     |
| 11 | 71752716 | 71752999 | KD2-H4K8ac_peak_5791 | 7.92775  |                                                     |
| 11 | 71791993 | 71792554 | KD2-H4K8ac_peak_5792 | 12.74171 | NUMA1_ENSG00000137497;LRTOMT_ENSG00000184154        |
| 11 | 71813727 | 71814345 | KD2-H4K8ac_peak_5793 | 18.94636 | LAMTOR1_ENSG00000149357;snoU13_ENSG00000238768      |
| 11 | 71814587 | 71815261 | KD2-H4K8ac_peak_5794 | 13.09607 | LAMTOR1_ENSG00000149357;snoU13_ENSG00000238768      |

|    |          |          |                      |          |                              |
|----|----------|----------|----------------------|----------|------------------------------|
| 11 | 71823992 | 71824672 | KD2-H4K8ac_peak_5795 | 9.11031  | ANAPC15_ENSG00000110200      |
| 11 | 71934652 | 71935474 | KD2-H4K8ac_peak_5796 | 20.02161 | INPPL1_ENSG00000165458       |
| 11 | 71935792 | 71936273 | KD2-H4K8ac_peak_5797 | 7.47462  |                              |
| 11 | 71948668 | 71949163 | KD2-H4K8ac_peak_5798 | 7.146    |                              |
| 11 | 71950793 | 71951380 | KD2-H4K8ac_peak_5799 | 16.57619 |                              |
| 11 | 71951777 | 71952174 | KD2-H4K8ac_peak_5800 | 9.57101  |                              |
| 11 | 71953576 | 71953786 | KD2-H4K8ac_peak_5801 | 6.35295  |                              |
| 11 | 71954033 | 71954407 | KD2-H4K8ac_peak_5802 | 7.40111  |                              |
| 11 | 71954648 | 71954853 | KD2-H4K8ac_peak_5803 | 6.56211  |                              |
| 11 | 71955317 | 71956540 | KD2-H4K8ac_peak_5804 | 15.53798 | PHOX2A_ENSG00000165462       |
| 11 | 72017118 | 72017657 | KD2-H4K8ac_peak_5805 | 7.76329  |                              |
| 11 | 72018608 | 72019556 | KD2-H4K8ac_peak_5806 | 11.60333 |                              |
| 11 | 72019972 | 72022245 | KD2-H4K8ac_peak_5807 | 13.09607 |                              |
| 11 | 72022515 | 72022957 | KD2-H4K8ac_peak_5808 | 7.47462  |                              |
| 11 | 72029766 | 72030032 | KD2-H4K8ac_peak_5809 | 10.65724 |                              |
| 11 | 72031424 | 72032013 | KD2-H4K8ac_peak_5810 | 9.34989  |                              |
| 11 | 72033395 | 72033655 | KD2-H4K8ac_peak_5811 | 6.0073   |                              |
| 11 | 72035661 | 72036097 | KD2-H4K8ac_peak_5812 | 7.47462  |                              |
| 11 | 72037937 | 72038493 | KD2-H4K8ac_peak_5813 | 4.67342  |                              |
| 11 | 72039364 | 72039649 | KD2-H4K8ac_peak_5814 | 3.7063   |                              |
| 11 | 72045255 | 72045926 | KD2-H4K8ac_peak_5815 | 10.43145 |                              |
| 11 | 72046250 | 72046576 | KD2-H4K8ac_peak_5816 | 6.58902  |                              |
| 11 | 72052011 | 72052225 | KD2-H4K8ac_peak_5817 | 7.79741  |                              |
| 11 | 72060476 | 72060813 | KD2-H4K8ac_peak_5818 | 16.09057 |                              |
| 11 | 72061185 | 72061486 | KD2-H4K8ac_peak_5819 | 9.51625  | RP11-45F15.1_ENSG00000256739 |
| 11 | 72064550 | 72064798 | KD2-H4K8ac_peak_5820 | 6.81873  | RP11-45F15.2_ENSG0000025672  |
| 11 | 72067270 | 72068299 | KD2-H4K8ac_peak_5821 | 10.72656 |                              |
| 11 | 72068854 | 72069148 | KD2-H4K8ac_peak_5822 | 13.31016 |                              |
| 11 | 72069375 | 72069781 | KD2-H4K8ac_peak_5823 | 9.47671  |                              |
| 11 | 72071014 | 72071293 | KD2-H4K8ac_peak_5824 | 5.54647  |                              |
| 11 | 72071523 | 72071835 | KD2-H4K8ac_peak_5825 | 10.1591  |                              |
| 11 | 72079832 | 72080748 | KD2-H4K8ac_peak_5826 | 11.30637 |                              |
| 11 | 72081652 | 72082418 | KD2-H4K8ac_peak_5827 | 13.80319 |                              |
| 11 | 72083949 | 72084254 | KD2-H4K8ac_peak_5828 | 9.96798  |                              |
| 11 | 72122049 | 72122452 | KD2-H4K8ac_peak_5829 | 7.146    | RP11-7N14.1_ENSG00000256403  |
| 11 | 72123209 | 72123768 | KD2-H4K8ac_peak_5830 | 11.28831 |                              |
| 11 | 72145012 | 72145571 | KD2-H4K8ac_peak_5831 | 12.84642 | CLPB_ENSG00000162129         |
| 11 | 72146043 | 72146240 | KD2-H4K8ac_peak_5832 | 11.05407 | CLPB_ENSG00000162129         |
| 11 | 72182608 | 72183073 | KD2-H4K8ac_peak_5833 | 9.8758   |                              |
| 11 | 72336729 | 72337480 | KD2-H4K8ac_peak_5834 | 14.08365 |                              |
| 11 | 72339816 | 72340423 | KD2-H4K8ac_peak_5835 | 8.58069  |                              |
| 11 | 72342625 | 72342836 | KD2-H4K8ac_peak_5836 | 5.63186  |                              |
| 11 | 72343076 | 72343474 | KD2-H4K8ac_peak_5837 | 8.87852  |                              |
| 11 | 72423564 | 72423780 | KD2-H4K8ac_peak_5838 | 6.33462  |                              |
| 11 | 72432592 | 72433040 | KD2-H4K8ac_peak_5839 | 12.65397 |                              |
| 11 | 72433460 | 72433932 | KD2-H4K8ac_peak_5840 | 6.24114  |                              |

|    |          |          |                      |          |                                                                        |
|----|----------|----------|----------------------|----------|------------------------------------------------------------------------|
| 11 | 72463048 | 72463370 | KD2-H4K8ac_peak_5841 | 5.9696   |                                                                        |
| 11 | 72493039 | 72493603 | KD2-H4K8ac_peak_5842 | 5.07021  | MIR4692_ENSG00000265064                                                |
| 11 | 72503955 | 72504219 | KD2-H4K8ac_peak_5843 | 4.211    | ARAP1_ENSG00000186635;STARD10_ENSG00000214530                          |
| 11 | 72505294 | 72505501 | KD2-H4K8ac_peak_5844 | 5.94347  | ARAP1_ENSG00000186635;STARD10_ENSG00000214530                          |
| 11 | 72525064 | 72525318 | KD2-H4K8ac_peak_5845 | 6.24114  | ATG16L2_ENSG00000168010                                                |
| 11 | 72532683 | 72533098 | KD2-H4K8ac_peak_5846 | 15.57998 |                                                                        |
| 11 | 72533473 | 72534159 | KD2-H4K8ac_peak_5847 | 9.6247   |                                                                        |
| 11 | 72740761 | 72740986 | KD2-H4K8ac_peak_5848 | 6.56926  |                                                                        |
| 11 | 72852859 | 72853272 | KD2-H4K8ac_peak_5849 | 5.59859  | FCHSD2_ENSG00000137478                                                 |
| 11 | 72854009 | 72854587 | KD2-H4K8ac_peak_5850 | 8.56219  | FCHSD2_ENSG00000137478                                                 |
| 11 | 72929319 | 72929521 | KD2-H4K8ac_peak_5851 | 8.30974  | P2RY2_ENSG00000175591                                                  |
| 11 | 72953444 | 72954377 | KD2-H4K8ac_peak_5852 | 8.85813  |                                                                        |
| 11 | 72983321 | 72984007 | KD2-H4K8ac_peak_5853 | 11.8457  |                                                                        |
| 11 | 72998650 | 72999016 | KD2-H4K8ac_peak_5854 | 5.88845  |                                                                        |
| 11 | 73000356 | 73000608 | KD2-H4K8ac_peak_5855 | 6.20982  |                                                                        |
| 11 | 73018082 | 73018389 | KD2-H4K8ac_peak_5856 | 10.54933 | ARHGEF17_ENSG00000110237                                               |
| 11 | 73019007 | 73020290 | KD2-H4K8ac_peak_5857 | 7.07117  | RP11-800A3.7_ENSG00000257038;ARHGEF17_ENSG00000110237                  |
| 11 | 73024207 | 73024420 | KD2-H4K8ac_peak_5858 | 8.66368  |                                                                        |
| 11 | 73032155 | 73032637 | KD2-H4K8ac_peak_5859 | 6.48242  |                                                                        |
| 11 | 73033337 | 73033748 | KD2-H4K8ac_peak_5860 | 7.76329  |                                                                        |
| 11 | 73034400 | 73034956 | KD2-H4K8ac_peak_5861 | 10.46874 |                                                                        |
| 11 | 73042134 | 73042424 | KD2-H4K8ac_peak_5862 | 5.88845  |                                                                        |
| 11 | 73044631 | 73044922 | KD2-H4K8ac_peak_5863 | 4.85384  |                                                                        |
| 11 | 73045754 | 73046397 | KD2-H4K8ac_peak_5864 | 5.30799  |                                                                        |
| 11 | 73086782 | 73087163 | KD2-H4K8ac_peak_5865 | 5.9696   | RELT_ENSG00000054967                                                   |
| 11 | 73310362 | 73310735 | KD2-H4K8ac_peak_5866 | 8.4084   |                                                                        |
| 11 | 73358693 | 73358962 | KD2-H4K8ac_peak_5867 | 5.61067  |                                                                        |
| 11 | 73471427 | 73472097 | KD2-H4K8ac_peak_5868 | 17.16047 | RAB6A_ENSG00000175582;RP11-707G14.1_ENSG00000256034                    |
| 11 | 73472620 | 73473035 | KD2-H4K8ac_peak_5869 | 7.67504  | RAB6A_ENSG00000175582                                                  |
| 11 | 73490279 | 73490501 | KD2-H4K8ac_peak_5870 | 7.27716  |                                                                        |
| 11 | 73491144 | 73491613 | KD2-H4K8ac_peak_5871 | 10.21502 |                                                                        |
| 11 | 73578523 | 73578727 | KD2-H4K8ac_peak_5872 | 7.18916  |                                                                        |
| 11 | 73587455 | 73587848 | KD2-H4K8ac_peak_5873 | 9.63487  | COA4_ENSG00000181924;PAAF1_ENSG00000175575                             |
| 11 | 73693210 | 73693474 | KD2-H4K8ac_peak_5874 | 8.23274  | UCP2_ENSG00000175567                                                   |
| 11 | 73694557 | 73695079 | KD2-H4K8ac_peak_5875 | 10.43145 | UCP2_ENSG00000175567                                                   |
| 11 | 73881519 | 73881897 | KD2-H4K8ac_peak_5876 | 11.1952  | C2CD3_ENSG00000168014;PPME1_ENSG00000214517                            |
| 11 | 74109683 | 74110426 | KD2-H4K8ac_peak_5877 | 10.19949 | PGM2L1_ENSG00000165434;MIR548AL_ENSG00000264402                        |
| 11 | 74114692 | 74114910 | KD2-H4K8ac_peak_5878 | 6.94255  |                                                                        |
| 11 | 74204414 | 74205018 | KD2-H4K8ac_peak_5879 | 9.57101  | LIPT2_ENSG00000175536;AP001372.2_ENSG00000254837;POLD3_ENSG00000077514 |
| 11 | 74383633 | 74384040 | KD2-H4K8ac_peak_5880 | 6.83936  |                                                                        |
| 11 | 74384546 | 74384780 | KD2-H4K8ac_peak_5881 | 6.66692  |                                                                        |
| 11 | 74394611 | 74394804 | KD2-H4K8ac_peak_5882 | 5.61067  |                                                                        |
| 11 | 74459216 | 74459541 | KD2-H4K8ac_peak_5883 | 5.54647  | RNF169_ENSG00000166439                                                 |
| 11 | 74460018 | 74460358 | KD2-H4K8ac_peak_5884 | 11.92978 | RNF169_ENSG00000166439                                                 |
| 11 | 74659893 | 74660088 | KD2-H4K8ac_peak_5885 | 10.43145 | XRRA1_ENSG00000166435;SPCS2_ENSG00000118363                            |
| 11 | 74660375 | 74660578 | KD2-H4K8ac_peak_5886 | 6.25869  | XRRA1_ENSG00000166435;SPCS2_ENSG00000118363                            |

|    |          |          |                      |          |                                                        |
|----|----------|----------|----------------------|----------|--------------------------------------------------------|
| 11 | 74699266 | 74699460 | KD2-H4K8ac_peak_5887 | 8.17902  | NEU3_ENSG00000162139                                   |
| 11 | 74953024 | 74953235 | KD2-H4K8ac_peak_5888 | 4.35724  | CTD-2562J17.4_ENSG00000255136                          |
| 11 | 75012638 | 75013269 | KD2-H4K8ac_peak_5889 | 8.59579  |                                                        |
| 11 | 75013601 | 75013989 | KD2-H4K8ac_peak_5890 | 8.1718   |                                                        |
| 11 | 75014355 | 75014904 | KD2-H4K8ac_peak_5891 | 5.54647  |                                                        |
| 11 | 75022822 | 75023472 | KD2-H4K8ac_peak_5892 | 10.87093 |                                                        |
| 11 | 75050124 | 75050349 | KD2-H4K8ac_peak_5893 | 8.23796  |                                                        |
| 11 | 75050853 | 75052044 | KD2-H4K8ac_peak_5894 | 11.50346 |                                                        |
| 11 | 75062349 | 75063293 | KD2-H4K8ac_peak_5895 | 11.83301 | ARRB1_ENSG00000137486                                  |
| 11 | 75095432 | 75095678 | KD2-H4K8ac_peak_5896 | 8.17902  |                                                        |
| 11 | 75110054 | 75110282 | KD2-H4K8ac_peak_5897 | 6.92624  | RPS3_ENSG00000149273                                   |
| 11 | 75110618 | 75110856 | KD2-H4K8ac_peak_5898 | 12.82393 | RPS3_ENSG00000149273;SNORD15A_ENSG00000206941          |
| 11 | 75138762 | 75138981 | KD2-H4K8ac_peak_5899 | 7.31433  |                                                        |
| 11 | 75140727 | 75141809 | KD2-H4K8ac_peak_5900 | 12.82393 | KLHL35_ENSG00000149243                                 |
| 11 | 75181953 | 75182174 | KD2-H4K8ac_peak_5901 | 6.56211  |                                                        |
| 11 | 75236445 | 75236876 | KD2-H4K8ac_peak_5902 | 7.36799  | GDPD5_ENSG00000158555                                  |
| 11 | 75251255 | 75251618 | KD2-H4K8ac_peak_5903 | 4.67342  |                                                        |
| 11 | 75258865 | 75259201 | KD2-H4K8ac_peak_5904 | 7.27716  |                                                        |
| 11 | 75264839 | 75265330 | KD2-H4K8ac_peak_5905 | 6.99815  |                                                        |
| 11 | 75265856 | 75266669 | KD2-H4K8ac_peak_5906 | 13.3695  |                                                        |
| 11 | 75268535 | 75268772 | KD2-H4K8ac_peak_5907 | 6.25869  |                                                        |
| 11 | 75272648 | 75274701 | KD2-H4K8ac_peak_5908 | 16.31471 | SERPINH1_ENSG00000149257                               |
| 11 | 75293372 | 75293655 | KD2-H4K8ac_peak_5909 | 6.25869  | CTD-2530H12.4_ENSG00000255326                          |
| 11 | 75293904 | 75295530 | KD2-H4K8ac_peak_5910 | 29.65657 | CTD-2530H12.4_ENSG00000255326                          |
| 11 | 75339010 | 75339651 | KD2-H4K8ac_peak_5911 | 14.84786 |                                                        |
| 11 | 75378445 | 75379030 | KD2-H4K8ac_peak_5912 | 8.55271  |                                                        |
| 11 | 75379429 | 75379648 | KD2-H4K8ac_peak_5913 | 6.83936  | MAP6_ENSG00000171533                                   |
| 11 | 75479213 | 75480209 | KD2-H4K8ac_peak_5914 | 10.46874 | CTD-2530H12.1_ENSG00000247867                          |
| 11 | 75526403 | 75526629 | KD2-H4K8ac_peak_5915 | 4.54006  | RP11-535A19.2_ENSG00000255507;UVRAG_ENSG00000198382    |
| 11 | 75880732 | 75880925 | KD2-H4K8ac_peak_5916 | 6.50927  |                                                        |
| 11 | 75891795 | 75892149 | KD2-H4K8ac_peak_5917 | 4.77079  |                                                        |
| 11 | 75896920 | 75897306 | KD2-H4K8ac_peak_5918 | 5.14125  |                                                        |
| 11 | 75945676 | 75946092 | KD2-H4K8ac_peak_5919 | 9.1707   |                                                        |
| 11 | 76091619 | 76092108 | KD2-H4K8ac_peak_5920 | 6.40297  | PRKRIR_ENSG00000137492;RP11-111M22.2_ENSG00000179240   |
| 11 | 76155281 | 76155527 | KD2-H4K8ac_peak_5921 | 9.8758   | RP11-111M22.3_ENSG00000255135;C11orf30_ENSG00000158636 |
| 11 | 76156151 | 76156362 | KD2-H4K8ac_peak_5922 | 7.36799  | RP11-111M22.3_ENSG00000255135;C11orf30_ENSG00000158636 |
| 11 | 76314773 | 76315227 | KD2-H4K8ac_peak_5923 | 7.76329  |                                                        |
| 11 | 76315425 | 76316042 | KD2-H4K8ac_peak_5924 | 8.59579  |                                                        |
| 11 | 76325185 | 76325444 | KD2-H4K8ac_peak_5925 | 4.66652  |                                                        |
| 11 | 76327024 | 76327328 | KD2-H4K8ac_peak_5926 | 10.08707 |                                                        |
| 11 | 76382008 | 76382318 | KD2-H4K8ac_peak_5927 | 8.85813  | LRRC32_ENSG00000137507                                 |
| 11 | 76432682 | 76432945 | KD2-H4K8ac_peak_5928 | 10.05606 |                                                        |
| 11 | 76493333 | 76493543 | KD2-H4K8ac_peak_5929 | 12.84642 | TSKU_ENSG00000182704;RP11-21L23.3_ENSG00000255100      |
| 11 | 76494367 | 76494861 | KD2-H4K8ac_peak_5930 | 11.24702 | RP11-21L23.3_ENSG00000255100                           |
| 11 | 76509931 | 76510235 | KD2-H4K8ac_peak_5931 | 4.06758  |                                                        |
| 11 | 76750646 | 76750910 | KD2-H4K8ac_peak_5932 | 7.96322  |                                                        |

|    |          |          |                      |          |                                                      |
|----|----------|----------|----------------------|----------|------------------------------------------------------|
| 11 | 76776945 | 76777268 | KD2-H4K8ac_peak_5933 | 6.05809  | CAPN5_ENSG00000149260                                |
| 11 | 76782659 | 76783163 | KD2-H4K8ac_peak_5934 | 7.64093  |                                                      |
| 11 | 76784628 | 76785881 | KD2-H4K8ac_peak_5935 | 6.0605   |                                                      |
| 11 | 76792647 | 76793533 | KD2-H4K8ac_peak_5936 | 6.67092  |                                                      |
| 11 | 76838014 | 76838755 | KD2-H4K8ac_peak_5937 | 10.46264 | MYO7A_ENSG00000137474                                |
| 11 | 76839329 | 76839800 | KD2-H4K8ac_peak_5938 | 7.99241  | MYO7A_ENSG00000137474                                |
| 11 | 76851303 | 76851518 | KD2-H4K8ac_peak_5939 | 5.14125  |                                                      |
| 11 | 77184107 | 77184741 | KD2-H4K8ac_peak_5940 | 19.72117 | PAK1_ENSG00000149269;DKFZP434E1119_ENSG00000268635   |
| 11 | 77184937 | 77185584 | KD2-H4K8ac_peak_5941 | 9.65086  | PAK1_ENSG00000149269;DKFZP434E1119_ENSG00000268635   |
| 11 | 77299825 | 77300035 | KD2-H4K8ac_peak_5942 | 7.13615  | AQP11_ENSG00000178301                                |
| 11 | 77300294 | 77301321 | KD2-H4K8ac_peak_5943 | 13.44374 | AQP11_ENSG00000178301                                |
| 11 | 77348423 | 77349070 | KD2-H4K8ac_peak_5944 | 16.09057 | CLNS1A_ENSG00000074201                               |
| 11 | 77349587 | 77349990 | KD2-H4K8ac_peak_5945 | 6.30229  | CLNS1A_ENSG00000074201                               |
| 11 | 77530882 | 77531708 | KD2-H4K8ac_peak_5946 | 12.93209 | RSF1_ENSG00000048649;AAMDC_ENSG00000087884           |
| 11 | 77574192 | 77574459 | KD2-H4K8ac_peak_5947 | 5.55317  |                                                      |
| 11 | 77742358 | 77742761 | KD2-H4K8ac_peak_5948 | 7.47462  |                                                      |
| 11 | 77750421 | 77750995 | KD2-H4K8ac_peak_5949 | 6.25869  |                                                      |
| 11 | 77751593 | 77751904 | KD2-H4K8ac_peak_5950 | 4.49837  |                                                      |
| 11 | 77790532 | 77791144 | KD2-H4K8ac_peak_5951 | 15.57998 | NDUFC2-KCTD14_ENSG00000259112;NDUFC2_ENSG00000151366 |
| 11 | 77850079 | 77850571 | KD2-H4K8ac_peak_5952 | 6.99815  | ALG8_ENSG00000159063;KCTD21-AS1_ENSG00000246174      |
| 11 | 77872591 | 77872984 | KD2-H4K8ac_peak_5953 | 6.66692  |                                                      |
| 11 | 77873315 | 77873980 | KD2-H4K8ac_peak_5954 | 10.21502 |                                                      |
| 11 | 77879823 | 77880110 | KD2-H4K8ac_peak_5955 | 5.9696   |                                                      |
| 11 | 77899421 | 77899638 | KD2-H4K8ac_peak_5956 | 8.88082  | KCTD21_ENSG00000188997;USP35_ENSG00000118369         |
| 11 | 78031086 | 78031456 | KD2-H4K8ac_peak_5957 | 4.86324  |                                                      |
| 11 | 78064112 | 78064424 | KD2-H4K8ac_peak_5958 | 6.0073   |                                                      |
| 11 | 78129117 | 78129482 | KD2-H4K8ac_peak_5959 | 6.20982  | GAB2_ENSG00000033327                                 |
| 11 | 78130316 | 78130786 | KD2-H4K8ac_peak_5960 | 5.20998  | GAB2_ENSG00000033327                                 |
| 11 | 78131095 | 78131459 | KD2-H4K8ac_peak_5961 | 17.83665 |                                                      |
| 11 | 78132448 | 78132919 | KD2-H4K8ac_peak_5962 | 13.02323 |                                                      |
| 11 | 78137068 | 78137737 | KD2-H4K8ac_peak_5963 | 7.40633  |                                                      |
| 11 | 78440910 | 78441454 | KD2-H4K8ac_peak_5964 | 4.42765  |                                                      |
| 11 | 78445655 | 78445907 | KD2-H4K8ac_peak_5965 | 5.57044  |                                                      |
| 11 | 78447017 | 78447281 | KD2-H4K8ac_peak_5966 | 8.30974  |                                                      |
| 11 | 78450730 | 78451272 | KD2-H4K8ac_peak_5967 | 17.42905 |                                                      |
| 11 | 78452277 | 78453058 | KD2-H4K8ac_peak_5968 | 11.60333 |                                                      |
| 11 | 78453744 | 78454053 | KD2-H4K8ac_peak_5969 | 9.16531  |                                                      |
| 11 | 78454264 | 78454479 | KD2-H4K8ac_peak_5970 | 6.50882  |                                                      |
| 11 | 78458015 | 78458220 | KD2-H4K8ac_peak_5971 | 4.0809   |                                                      |
| 11 | 78458419 | 78458624 | KD2-H4K8ac_peak_5972 | 5.34636  |                                                      |
| 11 | 78461610 | 78461835 | KD2-H4K8ac_peak_5973 | 6.25869  |                                                      |
| 11 | 78483468 | 78483726 | KD2-H4K8ac_peak_5974 | 7.12754  |                                                      |
| 11 | 78496187 | 78496380 | KD2-H4K8ac_peak_5975 | 5.57044  |                                                      |
| 11 | 78521408 | 78521633 | KD2-H4K8ac_peak_5976 | 5.88562  |                                                      |
| 11 | 78541325 | 78541619 | KD2-H4K8ac_peak_5977 | 4.98318  |                                                      |
| 11 | 78563523 | 78564110 | KD2-H4K8ac_peak_5978 | 6.65673  |                                                      |

|    |          |          |                      |          |                                                        |
|----|----------|----------|----------------------|----------|--------------------------------------------------------|
| 11 | 78565034 | 78565422 | KD2-H4K8ac_peak_5979 | 7.27716  |                                                        |
| 11 | 78567683 | 78568418 | KD2-H4K8ac_peak_5980 | 5.32137  |                                                        |
| 11 | 78569189 | 78569574 | KD2-H4K8ac_peak_5981 | 4.66652  |                                                        |
| 11 | 78572498 | 78573020 | KD2-H4K8ac_peak_5982 | 4.77079  |                                                        |
| 11 | 78577659 | 78577892 | KD2-H4K8ac_peak_5983 | 8.1233   |                                                        |
| 11 | 78642763 | 78643012 | KD2-H4K8ac_peak_5984 | 8.02571  |                                                        |
| 11 | 78661152 | 78661485 | KD2-H4K8ac_peak_5985 | 7.29632  |                                                        |
| 11 | 78661859 | 78662149 | KD2-H4K8ac_peak_5986 | 6.51023  |                                                        |
| 11 | 78692939 | 78693578 | KD2-H4K8ac_peak_5987 | 10.46264 |                                                        |
| 11 | 78693933 | 78694142 | KD2-H4K8ac_peak_5988 | 10.19949 |                                                        |
| 11 | 78694540 | 78694778 | KD2-H4K8ac_peak_5989 | 9.16605  |                                                        |
| 11 | 78699700 | 78700016 | KD2-H4K8ac_peak_5990 | 12.60538 |                                                        |
| 11 | 78728150 | 78728468 | KD2-H4K8ac_peak_5991 | 6.98517  |                                                        |
| 11 | 78728854 | 78729140 | KD2-H4K8ac_peak_5992 | 7.47462  |                                                        |
| 11 | 78774049 | 78774330 | KD2-H4K8ac_peak_5993 | 5.75757  |                                                        |
| 11 | 78776803 | 78777130 | KD2-H4K8ac_peak_5994 | 5.13893  |                                                        |
| 11 | 78777743 | 78778421 | KD2-H4K8ac_peak_5995 | 9.1707   |                                                        |
| 11 | 78779300 | 78779539 | KD2-H4K8ac_peak_5996 | 4.42765  |                                                        |
| 11 | 78783239 | 78783528 | KD2-H4K8ac_peak_5997 | 10.81728 |                                                        |
| 11 | 78785569 | 78785951 | KD2-H4K8ac_peak_5998 | 5.88562  |                                                        |
| 11 | 78788212 | 78788424 | KD2-H4K8ac_peak_5999 | 10.08707 |                                                        |
| 11 | 78788991 | 78789289 | KD2-H4K8ac_peak_6000 | 5.54647  |                                                        |
| 11 | 78790118 | 78790662 | KD2-H4K8ac_peak_6001 | 12.99417 |                                                        |
| 11 | 78790969 | 78791702 | KD2-H4K8ac_peak_6002 | 9.36516  |                                                        |
| 11 | 78798978 | 78799250 | KD2-H4K8ac_peak_6003 | 5.20998  |                                                        |
| 11 | 78801800 | 78801999 | KD2-H4K8ac_peak_6004 | 4.75875  |                                                        |
| 11 | 78816449 | 78816684 | KD2-H4K8ac_peak_6005 | 6.40683  |                                                        |
| 11 | 78821281 | 78821479 | KD2-H4K8ac_peak_6006 | 7.27716  |                                                        |
| 11 | 78831765 | 78832186 | KD2-H4K8ac_peak_6007 | 6.66692  |                                                        |
| 11 | 78832495 | 78832804 | KD2-H4K8ac_peak_6008 | 8.01894  |                                                        |
| 11 | 79149520 | 79149838 | KD2-H4K8ac_peak_6009 | 7.76329  |                                                        |
| 11 | 79151428 | 79151975 | KD2-H4K8ac_peak_6010 | 5.01002  | TENM4_ENSG00000149256                                  |
| 11 | 82444091 | 82444291 | KD2-H4K8ac_peak_6011 | 8.5092   | FAM181B_ENSG00000182103                                |
| 11 | 82444503 | 82445228 | KD2-H4K8ac_peak_6012 | 9.1707   | FAM181B_ENSG00000182103                                |
| 11 | 82501681 | 82501939 | KD2-H4K8ac_peak_6013 | 4.9025   | RP11-718B12.2_ENSG00000255382                          |
| 11 | 82503730 | 82503928 | KD2-H4K8ac_peak_6014 | 7.27716  |                                                        |
| 11 | 82719160 | 82719367 | KD2-H4K8ac_peak_6015 | 9.59147  |                                                        |
| 11 | 82783178 | 82783427 | KD2-H4K8ac_peak_6016 | 7.49599  | RAB30_ENSG00000137502;RAB30-AS1_ENSG00000246067        |
| 11 | 82866671 | 82867020 | KD2-H4K8ac_peak_6017 | 3.75035  |                                                        |
| 11 | 82903903 | 82904208 | KD2-H4K8ac_peak_6018 | 5.25071  | RP11-727A23.5_ENSG00000247137;ANKRD42_ENSG00000137494  |
| 11 | 82904405 | 82904606 | KD2-H4K8ac_peak_6019 | 12.42761 | RP11-727A23.5_ENSG00000247137;ANKRD42_ENSG00000137494  |
| 11 | 82996773 | 82996979 | KD2-H4K8ac_peak_6020 | 9.41619  | CCDC90B_ENSG00000137500;RP11-727A23.10_ENSG00000255234 |
| 11 | 84032908 | 84033161 | KD2-H4K8ac_peak_6021 | 4.37708  |                                                        |
| 11 | 85566233 | 85566770 | KD2-H4K8ac_peak_6022 | 12.57297 | AP000974.1_ENSG00000215504;CCDC83_ENSG00000150676      |
| 11 | 85779339 | 85779543 | KD2-H4K8ac_peak_6023 | 6.09229  |                                                        |
| 11 | 85780233 | 85780848 | KD2-H4K8ac_peak_6024 | 10.29344 | PICALM_ENSG00000073921                                 |

|    |          |          |                      |          |                                                    |
|----|----------|----------|----------------------|----------|----------------------------------------------------|
| 11 | 85955617 | 85956025 | KD2-H4K8ac_peak_6025 | 9.36516  | EED_ENSG00000074266                                |
| 11 | 86013339 | 86013774 | KD2-H4K8ac_peak_6026 | 12.30509 | C11orf73_ENSG00000149196                           |
| 11 | 86382801 | 86383106 | KD2-H4K8ac_peak_6027 | 7.76329  | ME3_ENSG00000151376                                |
| 11 | 86383359 | 86383756 | KD2-H4K8ac_peak_6028 | 8.37231  | ME3_ENSG00000151376                                |
| 11 | 86510793 | 86511880 | KD2-H4K8ac_peak_6029 | 17.17257 |                                                    |
| 11 | 86666045 | 86666304 | KD2-H4K8ac_peak_6030 | 3.90565  | FZD4_ENSG00000174804;RP11-736K20.6_ENSG00000246523 |
| 11 | 86748259 | 86748794 | KD2-H4K8ac_peak_6031 | 7.76329  | TMEM135_ENSG00000166575                            |
| 11 | 86749005 | 86749457 | KD2-H4K8ac_peak_6032 | 13.09607 | TMEM135_ENSG00000166575                            |
| 11 | 88070548 | 88070861 | KD2-H4K8ac_peak_6033 | 4.211    | CTSC_ENSG00000109861                               |
| 11 | 89224362 | 89225162 | KD2-H4K8ac_peak_6034 | 13.09607 |                                                    |
| 11 | 89867563 | 89867936 | KD2-H4K8ac_peak_6035 | 6.66692  |                                                    |
| 11 | 91665266 | 91665505 | KD2-H4K8ac_peak_6036 | 6.9809   |                                                    |
| 11 | 91959670 | 91960205 | KD2-H4K8ac_peak_6037 | 5.54647  |                                                    |
| 11 | 92504156 | 92504390 | KD2-H4K8ac_peak_6038 | 5.14125  |                                                    |
| 11 | 92562229 | 92562430 | KD2-H4K8ac_peak_6039 | 8.74596  |                                                    |
| 11 | 92584867 | 92585177 | KD2-H4K8ac_peak_6040 | 7.01964  |                                                    |
| 11 | 92712841 | 92713205 | KD2-H4K8ac_peak_6041 | 5.57044  |                                                    |
| 11 | 92930752 | 92931005 | KD2-H4K8ac_peak_6042 | 14.43794 | SLC36A4_ENSG00000180773                            |
| 11 | 93063622 | 93064131 | KD2-H4K8ac_peak_6043 | 7.11824  | CCDC67_ENSG00000165325                             |
| 11 | 93394314 | 93394630 | KD2-H4K8ac_peak_6044 | 6.76298  | KIAA1731_ENSG00000166004                           |
| 11 | 93394877 | 93395078 | KD2-H4K8ac_peak_6045 | 12.66412 | KIAA1731_ENSG00000166004                           |
| 11 | 93474100 | 93474472 | KD2-H4K8ac_peak_6046 | 9.89126  | C11orf54_ENSG00000182919                           |
| 11 | 93517545 | 93518056 | KD2-H4K8ac_peak_6047 | 14.8083  | TAF1D_ENSG00000166012;MED17_ENSG00000042429        |
| 11 | 93582854 | 93583766 | KD2-H4K8ac_peak_6048 | 11.92978 | VSTM5_ENSG00000214376                              |
| 11 | 93861541 | 93861810 | KD2-H4K8ac_peak_6049 | 12.88108 | PANX1_ENSG00000110218                              |
| 11 | 93862083 | 93863170 | KD2-H4K8ac_peak_6050 | 20.58734 | PANX1_ENSG00000110218                              |
| 11 | 93875196 | 93875420 | KD2-H4K8ac_peak_6051 | 3.75035  |                                                    |
| 11 | 94276874 | 94277766 | KD2-H4K8ac_peak_6052 | 11.24702 | PIWIL4_ENSG00000134627;FUT4_ENSG00000196371        |
| 11 | 94472711 | 94472941 | KD2-H4K8ac_peak_6053 | 3.75035  | RP11-867G2.8_ENSG00000255929                       |
| 11 | 94473349 | 94474011 | KD2-H4K8ac_peak_6054 | 9.1707   | RP11-867G2.8_ENSG00000255929                       |
| 11 | 94474224 | 94474432 | KD2-H4K8ac_peak_6055 | 4.211    | RP11-867G2.8_ENSG00000255929                       |
| 11 | 94500617 | 94501156 | KD2-H4K8ac_peak_6056 | 7.35686  |                                                    |
| 11 | 94501690 | 94502236 | KD2-H4K8ac_peak_6057 | 10.96455 |                                                    |
| 11 | 94657955 | 94658344 | KD2-H4K8ac_peak_6058 | 6.15357  | RP11-856F16.2_ENSG00000256469                      |
| 11 | 94667514 | 94667798 | KD2-H4K8ac_peak_6059 | 7.40111  |                                                    |
| 11 | 94668020 | 94668447 | KD2-H4K8ac_peak_6060 | 5.73839  |                                                    |
| 11 | 94800113 | 94801251 | KD2-H4K8ac_peak_6061 | 11.89502 | SRSF8_ENSG00000180771;SRSF8_ENSG00000271885        |
| 11 | 94822601 | 94822889 | KD2-H4K8ac_peak_6062 | 6.65673  | ENDOD1_ENSG00000149218                             |
| 11 | 94965289 | 94965687 | KD2-H4K8ac_peak_6063 | 6.25869  | SES3_ENSG00000149212                               |
| 11 | 94986471 | 94986940 | KD2-H4K8ac_peak_6064 | 6.16888  |                                                    |
| 11 | 95522322 | 95522722 | KD2-H4K8ac_peak_6065 | 11.92978 | FAM76B_ENSG00000077458;CEP57_ENSG00000166037       |
| 11 | 95523637 | 95524048 | KD2-H4K8ac_peak_6066 | 15.22643 | FAM76B_ENSG00000077458;CEP57_ENSG00000166037       |
| 11 | 95656725 | 95657661 | KD2-H4K8ac_peak_6067 | 11.92978 | MTMR2_ENSG00000087053                              |
| 11 | 95976639 | 95977237 | KD2-H4K8ac_peak_6068 | 14.74047 |                                                    |
| 11 | 96179990 | 96180381 | KD2-H4K8ac_peak_6069 | 4.42765  |                                                    |
| 11 | 96552732 | 96553018 | KD2-H4K8ac_peak_6070 | 5.25071  |                                                    |



|    |           |          |                      |          |                                                                    |
|----|-----------|----------|----------------------|----------|--------------------------------------------------------------------|
| 11 | 97617061  | 97617256 | KD2-H4K8ac_peak_6071 | 5.71749  |                                                                    |
| 11 | 101785830 | 1.02E+08 | KD2-H4K8ac_peak_6072 | 9.15329  | ANGPTL5_ENSG00000187151;KIAA1377_ENSG00000110318                   |
| 11 | 102188071 | 1.02E+08 | KD2-H4K8ac_peak_6073 | 5.88845  | BIRC3_ENSG00000023445                                              |
| 11 | 102217518 | 1.02E+08 | KD2-H4K8ac_peak_6074 | 7.36799  | BIRC2_ENSG00000110330                                              |
| 11 | 102218065 | 1.02E+08 | KD2-H4K8ac_peak_6075 | 6.66692  | BIRC2_ENSG00000110330                                              |
| 11 | 102322981 | 1.02E+08 | KD2-H4K8ac_peak_6076 | 14.8083  | RP11-315O6.1_ENSG00000255337                                       |
| 11 | 102962437 | 1.03E+08 | KD2-H4K8ac_peak_6077 | 7.40111  | DCUN1D5_ENSG00000137692                                            |
| 11 | 102963071 | 1.03E+08 | KD2-H4K8ac_peak_6078 | 8.1718   | DCUN1D5_ENSG00000137692                                            |
| 11 | 103149388 | 1.03E+08 | KD2-H4K8ac_peak_6079 | 4.01115  |                                                                    |
| 11 | 103401744 | 1.03E+08 | KD2-H4K8ac_peak_6080 | 7.12754  |                                                                    |
| 11 | 103406849 | 1.03E+08 | KD2-H4K8ac_peak_6081 | 6.36375  |                                                                    |
| 11 | 103408264 | 1.03E+08 | KD2-H4K8ac_peak_6082 | 7.12754  |                                                                    |
| 11 | 104034636 | 1.04E+08 | KD2-H4K8ac_peak_6083 | 6.66692  | PDGFD_ENSG00000170962                                              |
| 11 | 104035503 | 1.04E+08 | KD2-H4K8ac_peak_6084 | 5.57044  | PDGFD_ENSG00000170962                                              |
| 11 | 105481047 | 1.05E+08 | KD2-H4K8ac_peak_6085 | 9.73431  | GRIA4_ENSG00000152578                                              |
| 11 | 105947471 | 1.06E+08 | KD2-H4K8ac_peak_6086 | 4.211    | KBTBD3_ENSG00000182359                                             |
| 11 | 107328218 | 1.07E+08 | KD2-H4K8ac_peak_6087 | 10.86378 | CWF19L2_ENSG00000152404                                            |
| 11 | 107436196 | 1.07E+08 | KD2-H4K8ac_peak_6088 | 6.25869  | ALKBH8_ENSG00000137760                                             |
| 11 | 107798472 | 1.08E+08 | KD2-H4K8ac_peak_6089 | 5.54647  | SLC35F2_ENSG00000110660;RAB39A_ENSG00000179331                     |
| 11 | 107826894 | 1.08E+08 | KD2-H4K8ac_peak_6090 | 4.44748  |                                                                    |
| 11 | 107828435 | 1.08E+08 | KD2-H4K8ac_peak_6091 | 5.54647  |                                                                    |
| 11 | 107859220 | 1.08E+08 | KD2-H4K8ac_peak_6092 | 7.42204  |                                                                    |
| 11 | 107879729 | 1.08E+08 | KD2-H4K8ac_peak_6093 | 16.49944 | CUL5_ENSG00000166266                                               |
| 11 | 107992355 | 1.08E+08 | KD2-H4K8ac_peak_6094 | 10.87093 | RP11-144G7.2_ENSG00000255467;ACAT1_ENSG00000075239                 |
| 11 | 108093756 | 1.08E+08 | KD2-H4K8ac_peak_6095 | 9.15329  | NPAT_ENSG00000149308;ATM_ENSG00000149311                           |
| 11 | 108336888 | 1.08E+08 | KD2-H4K8ac_peak_6096 | 7.27716  |                                                                    |
| 11 | 108337714 | 1.08E+08 | KD2-H4K8ac_peak_6097 | 12.88108 | C11orf65_ENSG00000166323                                           |
| 11 | 108368777 | 1.08E+08 | KD2-H4K8ac_peak_6098 | 8.53092  | KDEL2_ENSG00000178202                                              |
| 11 | 108535014 | 1.09E+08 | KD2-H4K8ac_peak_6099 | 5.14125  | DDX10_ENSG00000178105                                              |
| 11 | 108536024 | 1.09E+08 | KD2-H4K8ac_peak_6100 | 8.1233   | DDX10_ENSG00000178105                                              |
| 11 | 108837999 | 1.09E+08 | KD2-H4K8ac_peak_6101 | 8.97719  |                                                                    |
| 11 | 108856596 | 1.09E+08 | KD2-H4K8ac_peak_6102 | 8.30974  |                                                                    |
| 11 | 109377217 | 1.09E+08 | KD2-H4K8ac_peak_6103 | 4.77079  |                                                                    |
| 11 | 109963690 | 1.1E+08  | KD2-H4K8ac_peak_6104 | 15.58442 | ZC3H12C_ENSG00000149289                                            |
| 11 | 110079915 | 1.1E+08  | KD2-H4K8ac_peak_6105 | 5.14125  |                                                                    |
| 11 | 110166855 | 1.1E+08  | KD2-H4K8ac_peak_6106 | 7.76104  | RDX_ENSG00000137710                                                |
| 11 | 110268826 | 1.1E+08  | KD2-H4K8ac_peak_6107 | 9.1707   |                                                                    |
| 11 | 110300435 | 1.1E+08  | KD2-H4K8ac_peak_6108 | 6.84261  | FDX1_ENSG00000137714                                               |
| 11 | 111170181 | 1.11E+08 | KD2-H4K8ac_peak_6109 | 8.1233   | COLCA2_ENSG00000214290                                             |
| 11 | 111307378 | 1.11E+08 | KD2-H4K8ac_peak_6110 | 7.40111  |                                                                    |
| 11 | 111383271 | 1.11E+08 | KD2-H4K8ac_peak_6111 | 8.02571  | BTG4_ENSG00000137707;MIR34B_ENSG00000207811;MIR34C_ENSG00000207562 |
| 11 | 111473257 | 1.11E+08 | KD2-H4K8ac_peak_6112 | 3.83717  | SIK2_ENSG00000170145                                               |
| 11 | 111504443 | 1.12E+08 | KD2-H4K8ac_peak_6113 | 7.51935  |                                                                    |
| 11 | 111601834 | 1.12E+08 | KD2-H4K8ac_peak_6114 | 5.57044  |                                                                    |
| 11 | 111604712 | 1.12E+08 | KD2-H4K8ac_peak_6115 | 6.56926  |                                                                    |
| 11 | 111605182 | 1.12E+08 | KD2-H4K8ac_peak_6116 | 7.47462  |                                                                    |

|    |           |          |                      |          |                                                                  |
|----|-----------|----------|----------------------|----------|------------------------------------------------------------------|
| 11 | 111665108 | 1.12E+08 | KD2-H4K8ac_peak_6117 | 6.24114  |                                                                  |
| 11 | 111668578 | 1.12E+08 | KD2-H4K8ac_peak_6118 | 4.77079  |                                                                  |
| 11 | 111741627 | 1.12E+08 | KD2-H4K8ac_peak_6119 | 10.19949 | ALG9_ENSG00000086848                                             |
| 11 | 111749430 | 1.12E+08 | KD2-H4K8ac_peak_6120 | 4.42765  | ALG9_ENSG00000258529;C11orf1_ENSG00000137720                     |
| 11 | 111749966 | 1.12E+08 | KD2-H4K8ac_peak_6121 | 15.53798 | ALG9_ENSG00000258529;C11orf1_ENSG00000137720                     |
| 11 | 111797197 | 1.12E+08 | KD2-H4K8ac_peak_6122 | 13.09607 | DIXDC1_ENSG00000150764                                           |
| 11 | 111895518 | 1.12E+08 | KD2-H4K8ac_peak_6123 | 10.73134 | DLAT_ENSG00000150768                                             |
| 11 | 111944148 | 1.12E+08 | KD2-H4K8ac_peak_6124 | 9.15329  | PIH1D2_ENSG00000150773;C11orf57_ENSG00000150776                  |
| 11 | 111945077 | 1.12E+08 | KD2-H4K8ac_peak_6125 | 8.85813  | PIH1D2_ENSG00000150773;C11orf57_ENSG00000150776                  |
| 11 | 111957074 | 1.12E+08 | KD2-H4K8ac_peak_6126 | 12.23    | TIMM8B_ENSG00000150779;SDHD_ENSG00000204370;SDHD_ENSG00000255292 |
| 11 | 111957735 | 1.12E+08 | KD2-H4K8ac_peak_6127 | 4.54006  | TIMM8B_ENSG00000150779;SDHD_ENSG00000204370;SDHD_ENSG00000255292 |
| 11 | 112096340 | 1.12E+08 | KD2-H4K8ac_peak_6128 | 20.96279 | PTS_ENSG00000150787                                              |
| 11 | 112135418 | 1.12E+08 | KD2-H4K8ac_peak_6129 | 5.71749  |                                                                  |
| 11 | 112647765 | 1.13E+08 | KD2-H4K8ac_peak_6130 | 12.42761 |                                                                  |
| 11 | 112648878 | 1.13E+08 | KD2-H4K8ac_peak_6131 | 7.79898  |                                                                  |
| 11 | 112655567 | 1.13E+08 | KD2-H4K8ac_peak_6132 | 6.25869  |                                                                  |
| 11 | 112704920 | 1.13E+08 | KD2-H4K8ac_peak_6133 | 8.85813  |                                                                  |
| 11 | 112705639 | 1.13E+08 | KD2-H4K8ac_peak_6134 | 13.34404 |                                                                  |
| 11 | 112706721 | 1.13E+08 | KD2-H4K8ac_peak_6135 | 10.46264 |                                                                  |
| 11 | 112708100 | 1.13E+08 | KD2-H4K8ac_peak_6136 | 8.4939   |                                                                  |
| 11 | 112752510 | 1.13E+08 | KD2-H4K8ac_peak_6137 | 5.88845  |                                                                  |
| 11 | 112832551 | 1.13E+08 | KD2-H4K8ac_peak_6138 | 5.54647  | NCAM1_ENSG00000149294                                            |
| 11 | 112833452 | 1.13E+08 | KD2-H4K8ac_peak_6139 | 7.70289  | RP11-629G13.1_ENSG00000247416                                    |
| 11 | 112834225 | 1.13E+08 | KD2-H4K8ac_peak_6140 | 7.47462  | RP11-629G13.1_ENSG00000247416                                    |
| 11 | 113009476 | 1.13E+08 | KD2-H4K8ac_peak_6141 | 3.76318  |                                                                  |
| 11 | 113071150 | 1.13E+08 | KD2-H4K8ac_peak_6142 | 5.71749  |                                                                  |
| 11 | 113072482 | 1.13E+08 | KD2-H4K8ac_peak_6143 | 9.82729  |                                                                  |
| 11 | 113073895 | 1.13E+08 | KD2-H4K8ac_peak_6144 | 7.44366  |                                                                  |
| 11 | 113144096 | 1.13E+08 | KD2-H4K8ac_peak_6145 | 5.14125  | NCAM1-AS1_ENSG00000227487                                        |
| 11 | 113185463 | 1.13E+08 | KD2-H4K8ac_peak_6146 | 5.71749  | RP11-839D17.3_ENSG00000255129;TTC12_ENSG00000149292              |
| 11 | 113308357 | 1.13E+08 | KD2-H4K8ac_peak_6147 | 7.32463  |                                                                  |
| 11 | 113313707 | 1.13E+08 | KD2-H4K8ac_peak_6148 | 6.25014  |                                                                  |
| 11 | 113316662 | 1.13E+08 | KD2-H4K8ac_peak_6149 | 5.61069  |                                                                  |
| 11 | 113420482 | 1.13E+08 | KD2-H4K8ac_peak_6150 | 9.1707   |                                                                  |
| 11 | 113424859 | 1.13E+08 | KD2-H4K8ac_peak_6151 | 6.56926  |                                                                  |
| 11 | 113447048 | 1.13E+08 | KD2-H4K8ac_peak_6152 | 4.42765  |                                                                  |
| 11 | 113448015 | 1.13E+08 | KD2-H4K8ac_peak_6153 | 9.36516  |                                                                  |
| 11 | 113448934 | 1.13E+08 | KD2-H4K8ac_peak_6154 | 10.0692  |                                                                  |
| 11 | 113450102 | 1.13E+08 | KD2-H4K8ac_peak_6155 | 5.88845  |                                                                  |
| 11 | 113459969 | 1.13E+08 | KD2-H4K8ac_peak_6156 | 7.79558  |                                                                  |
| 11 | 113460611 | 1.13E+08 | KD2-H4K8ac_peak_6157 | 5.73839  |                                                                  |
| 11 | 113462566 | 1.13E+08 | KD2-H4K8ac_peak_6158 | 7.0983   |                                                                  |
| 11 | 113644033 | 1.14E+08 | KD2-H4K8ac_peak_6159 | 12.3187  | ZW10_ENSG00000086827                                             |
| 11 | 113745948 | 1.14E+08 | KD2-H4K8ac_peak_6160 | 8.5092   | USP28_ENSG00000048028                                            |
| 11 | 113845859 | 1.14E+08 | KD2-H4K8ac_peak_6161 | 4.77079  | HTR3A_ENSG00000166736                                            |
| 11 | 114099165 | 1.14E+08 | KD2-H4K8ac_peak_6162 | 8.1233   |                                                                  |

|    |           |          |                      |          |                                                                             |
|----|-----------|----------|----------------------|----------|-----------------------------------------------------------------------------|
| 11 | 114151650 | 1.14E+08 | KD2-H4K8ac_peak_6163 | 12.82393 |                                                                             |
| 11 | 114270720 | 1.14E+08 | KD2-H4K8ac_peak_6164 | 6.84261  | C11orf71_ENSG00000180425;RBM7_ENSG00000076053;RP11-212D19.4_ENSG00000255663 |
| 11 | 114271396 | 1.14E+08 | KD2-H4K8ac_peak_6165 | 10.63441 | C11orf71_ENSG00000180425;RBM7_ENSG00000076053;RP11-212D19.4_ENSG00000255663 |
| 11 | 114645841 | 1.15E+08 | KD2-H4K8ac_peak_6166 | 6.40683  |                                                                             |
| 11 | 114954387 | 1.15E+08 | KD2-H4K8ac_peak_6167 | 4.06758  |                                                                             |
| 11 | 114999149 | 1.15E+08 | KD2-H4K8ac_peak_6168 | 4.77079  | ACA59_ENSG00000252870                                                       |
| 11 | 115071277 | 1.15E+08 | KD2-H4K8ac_peak_6169 | 7.22457  |                                                                             |
| 11 | 115374033 | 1.15E+08 | KD2-H4K8ac_peak_6170 | 6.45083  |                                                                             |
| 11 | 115447685 | 1.15E+08 | KD2-H4K8ac_peak_6171 | 8.09303  | RP11-136I14.4_ENSG00000255903                                               |
| 11 | 115450604 | 1.15E+08 | KD2-H4K8ac_peak_6172 | 9.31907  |                                                                             |
| 11 | 115451379 | 1.15E+08 | KD2-H4K8ac_peak_6173 | 5.405    |                                                                             |
| 11 | 115452546 | 1.15E+08 | KD2-H4K8ac_peak_6174 | 7.96322  | RP11-136I14.5_ENSG00000255689                                               |
| 11 | 115453352 | 1.15E+08 | KD2-H4K8ac_peak_6175 | 7.27716  | RP11-136I14.5_ENSG00000255689                                               |
| 11 | 115476674 | 1.15E+08 | KD2-H4K8ac_peak_6176 | 5.14125  |                                                                             |
| 11 | 115478445 | 1.15E+08 | KD2-H4K8ac_peak_6177 | 5.9696   |                                                                             |
| 11 | 115513600 | 1.16E+08 | KD2-H4K8ac_peak_6178 | 4.59912  |                                                                             |
| 11 | 115516942 | 1.16E+08 | KD2-H4K8ac_peak_6179 | 8.26945  |                                                                             |
| 11 | 115529795 | 1.16E+08 | KD2-H4K8ac_peak_6180 | 9.36516  | AP000797.3_ENSG00000256717                                                  |
| 11 | 115613290 | 1.16E+08 | KD2-H4K8ac_peak_6181 | 6.16747  |                                                                             |
| 11 | 115614469 | 1.16E+08 | KD2-H4K8ac_peak_6182 | 8.30974  |                                                                             |
| 11 | 115615868 | 1.16E+08 | KD2-H4K8ac_peak_6183 | 9.07715  |                                                                             |
| 11 | 115616777 | 1.16E+08 | KD2-H4K8ac_peak_6184 | 11.89502 |                                                                             |
| 11 | 115619491 | 1.16E+08 | KD2-H4K8ac_peak_6185 | 10.47747 |                                                                             |
| 11 | 115630346 | 1.16E+08 | KD2-H4K8ac_peak_6186 | 6.99815  | LINC00900_ENSG00000246100                                                   |
| 11 | 115655805 | 1.16E+08 | KD2-H4K8ac_peak_6187 | 8.21084  |                                                                             |
| 11 | 115830098 | 1.16E+08 | KD2-H4K8ac_peak_6188 | 4.01115  |                                                                             |
| 11 | 115846232 | 1.16E+08 | KD2-H4K8ac_peak_6189 | 4.67342  |                                                                             |
| 11 | 115931349 | 1.16E+08 | KD2-H4K8ac_peak_6190 | 7.10552  |                                                                             |
| 11 | 115932328 | 1.16E+08 | KD2-H4K8ac_peak_6191 | 9.95119  |                                                                             |
| 11 | 115935491 | 1.16E+08 | KD2-H4K8ac_peak_6192 | 7.36799  |                                                                             |
| 11 | 115944657 | 1.16E+08 | KD2-H4K8ac_peak_6193 | 5.29555  |                                                                             |
| 11 | 115948597 | 1.16E+08 | KD2-H4K8ac_peak_6194 | 7.62364  |                                                                             |
| 11 | 116044763 | 1.16E+08 | KD2-H4K8ac_peak_6195 | 5.21139  |                                                                             |
| 11 | 116048282 | 1.16E+08 | KD2-H4K8ac_peak_6196 | 6.09229  |                                                                             |
| 11 | 116051116 | 1.16E+08 | KD2-H4K8ac_peak_6197 | 7.47462  |                                                                             |
| 11 | 116051725 | 1.16E+08 | KD2-H4K8ac_peak_6198 | 12.57143 |                                                                             |
| 11 | 116063694 | 1.16E+08 | KD2-H4K8ac_peak_6199 | 7.20567  |                                                                             |
| 11 | 116064139 | 1.16E+08 | KD2-H4K8ac_peak_6200 | 6.50927  |                                                                             |
| 11 | 116069745 | 1.16E+08 | KD2-H4K8ac_peak_6201 | 7.45501  |                                                                             |
| 11 | 116078453 | 1.16E+08 | KD2-H4K8ac_peak_6202 | 10.65724 |                                                                             |
| 11 | 116095326 | 1.16E+08 | KD2-H4K8ac_peak_6203 | 7.71478  |                                                                             |
| 11 | 116095876 | 1.16E+08 | KD2-H4K8ac_peak_6204 | 5.73839  |                                                                             |
| 11 | 116147567 | 1.16E+08 | KD2-H4K8ac_peak_6205 | 5.01002  |                                                                             |
| 11 | 116182209 | 1.16E+08 | KD2-H4K8ac_peak_6206 | 7.08474  |                                                                             |
| 11 | 116183054 | 1.16E+08 | KD2-H4K8ac_peak_6207 | 10.0692  |                                                                             |
| 11 | 116183521 | 1.16E+08 | KD2-H4K8ac_peak_6208 | 8.17902  |                                                                             |

|    |           |          |                      |          |                                                        |
|----|-----------|----------|----------------------|----------|--------------------------------------------------------|
| 11 | 116226299 | 1.16E+08 | KD2-H4K8ac_peak_6209 | 4.42765  |                                                        |
| 11 | 116243060 | 1.16E+08 | KD2-H4K8ac_peak_6210 | 8.16133  |                                                        |
| 11 | 116253231 | 1.16E+08 | KD2-H4K8ac_peak_6211 | 5.25269  |                                                        |
| 11 | 116255603 | 1.16E+08 | KD2-H4K8ac_peak_6212 | 13.73635 |                                                        |
| 11 | 116256499 | 1.16E+08 | KD2-H4K8ac_peak_6213 | 8.53092  |                                                        |
| 11 | 116284536 | 1.16E+08 | KD2-H4K8ac_peak_6214 | 6.99815  |                                                        |
| 11 | 116287993 | 1.16E+08 | KD2-H4K8ac_peak_6215 | 8.02571  |                                                        |
| 11 | 116295468 | 1.16E+08 | KD2-H4K8ac_peak_6216 | 6.04107  |                                                        |
| 11 | 116299276 | 1.16E+08 | KD2-H4K8ac_peak_6217 | 7.73264  |                                                        |
| 11 | 116333017 | 1.16E+08 | KD2-H4K8ac_peak_6218 | 4.60576  |                                                        |
| 11 | 116369583 | 1.16E+08 | KD2-H4K8ac_peak_6219 | 7.76104  |                                                        |
| 11 | 116370767 | 1.16E+08 | KD2-H4K8ac_peak_6220 | 16.54484 | AP001891.1_ENSG00000236437                             |
| 11 | 116373393 | 1.16E+08 | KD2-H4K8ac_peak_6221 | 8.79106  |                                                        |
| 11 | 116374218 | 1.16E+08 | KD2-H4K8ac_peak_6222 | 7.20567  |                                                        |
| 11 | 116375502 | 1.16E+08 | KD2-H4K8ac_peak_6223 | 13.95627 |                                                        |
| 11 | 116377136 | 1.16E+08 | KD2-H4K8ac_peak_6224 | 15.61313 |                                                        |
| 11 | 116411450 | 1.16E+08 | KD2-H4K8ac_peak_6225 | 6.00243  |                                                        |
| 11 | 116427827 | 1.16E+08 | KD2-H4K8ac_peak_6226 | 7.95563  |                                                        |
| 11 | 116437882 | 1.16E+08 | KD2-H4K8ac_peak_6227 | 3.72305  |                                                        |
| 11 | 116439712 | 1.16E+08 | KD2-H4K8ac_peak_6228 | 7.79898  |                                                        |
| 11 | 116450162 | 1.16E+08 | KD2-H4K8ac_peak_6229 | 12.99417 |                                                        |
| 11 | 116511706 | 1.17E+08 | KD2-H4K8ac_peak_6230 | 7.36799  |                                                        |
| 11 | 116561919 | 1.17E+08 | KD2-H4K8ac_peak_6231 | 6.69844  |                                                        |
| 11 | 116573403 | 1.17E+08 | KD2-H4K8ac_peak_6232 | 4.86324  |                                                        |
| 11 | 116573896 | 1.17E+08 | KD2-H4K8ac_peak_6233 | 12.00273 |                                                        |
| 11 | 116602060 | 1.17E+08 | KD2-H4K8ac_peak_6234 | 6.40683  |                                                        |
| 11 | 116643275 | 1.17E+08 | KD2-H4K8ac_peak_6235 | 12.82393 | BUD13_ENSG00000137656;AP006216.10_ENSG00000226645      |
| 11 | 116644008 | 1.17E+08 | KD2-H4K8ac_peak_6236 | 11.49574 | BUD13_ENSG00000137656;AP006216.10_ENSG00000226645      |
| 11 | 116658501 | 1.17E+08 | KD2-H4K8ac_peak_6237 | 7.44324  | ZNF259_ENSG00000109917                                 |
| 11 | 116699563 | 1.17E+08 | KD2-H4K8ac_peak_6238 | 4.06758  | APOC3_ENSG00000110245                                  |
| 11 | 116700116 | 1.17E+08 | KD2-H4K8ac_peak_6239 | 11.79585 | APOC3_ENSG00000110245                                  |
| 11 | 116968825 | 1.17E+08 | KD2-H4K8ac_peak_6240 | 9.36516  | SIK3_ENSG00000160584;AP000936.4_ENSG00000224077        |
| 11 | 117014519 | 1.17E+08 | KD2-H4K8ac_peak_6241 | 7.76329  | RP11-109L13.5_ENSG00000254678;PAFAH1B2_ENSG00000168092 |
| 11 | 117103659 | 1.17E+08 | KD2-H4K8ac_peak_6242 | 10.43145 | PCSK7_ENSG00000160613;RNF214_ENSG00000167257           |
| 11 | 117186251 | 1.17E+08 | KD2-H4K8ac_peak_6243 | 11.14658 | BACE1_ENSG00000186318;CEP164_ENSG00000110274           |
| 11 | 117198625 | 1.17E+08 | KD2-H4K8ac_peak_6244 | 14.56955 | AP000892.4_ENSG00000250699                             |
| 11 | 117249439 | 1.17E+08 | KD2-H4K8ac_peak_6245 | 4.24345  |                                                        |
| 11 | 117313766 | 1.17E+08 | KD2-H4K8ac_peak_6246 | 18.54875 |                                                        |
| 11 | 117315960 | 1.17E+08 | KD2-H4K8ac_peak_6247 | 6.66359  |                                                        |
| 11 | 117358756 | 1.17E+08 | KD2-H4K8ac_peak_6248 | 12.84642 |                                                        |
| 11 | 117360244 | 1.17E+08 | KD2-H4K8ac_peak_6249 | 13.50024 |                                                        |
| 11 | 117361111 | 1.17E+08 | KD2-H4K8ac_peak_6250 | 8.73935  |                                                        |
| 11 | 117368603 | 1.17E+08 | KD2-H4K8ac_peak_6251 | 6.98517  |                                                        |
| 11 | 117372136 | 1.17E+08 | KD2-H4K8ac_peak_6252 | 5.30799  |                                                        |
| 11 | 117381673 | 1.17E+08 | KD2-H4K8ac_peak_6253 | 5.95537  |                                                        |
| 11 | 117382623 | 1.17E+08 | KD2-H4K8ac_peak_6254 | 8.53092  |                                                        |

|    |           |          |                      |          |                                                                       |
|----|-----------|----------|----------------------|----------|-----------------------------------------------------------------------|
| 11 | 117383756 | 1.17E+08 | KD2-H4K8ac_peak_6255 | 5.54647  |                                                                       |
| 11 | 117395633 | 1.17E+08 | KD2-H4K8ac_peak_6256 | 8.30974  |                                                                       |
| 11 | 117550156 | 1.18E+08 | KD2-H4K8ac_peak_6257 | 7.01658  |                                                                       |
| 11 | 117588730 | 1.18E+08 | KD2-H4K8ac_peak_6258 | 5.20908  |                                                                       |
| 11 | 117679792 | 1.18E+08 | KD2-H4K8ac_peak_6259 | 10.05606 |                                                                       |
| 11 | 117687624 | 1.18E+08 | KD2-H4K8ac_peak_6260 | 10.65724 | DSCAML1_ENSG00000177103                                               |
| 11 | 117740912 | 1.18E+08 | KD2-H4K8ac_peak_6261 | 4.54006  |                                                                       |
| 11 | 117746255 | 1.18E+08 | KD2-H4K8ac_peak_6262 | 12.08081 | FXYD6-FXYD2_ENSG00000255245;FXYD6_ENSG00000137726                     |
| 11 | 117856794 | 1.18E+08 | KD2-H4K8ac_peak_6263 | 8.85813  | IL10RA_ENSG00000110324                                                |
| 11 | 118016521 | 1.18E+08 | KD2-H4K8ac_peak_6264 | 16.73922 |                                                                       |
| 11 | 118122504 | 1.18E+08 | KD2-H4K8ac_peak_6265 | 14.74047 | MPZL3_ENSG00000160588                                                 |
| 11 | 118229658 | 1.18E+08 | KD2-H4K8ac_peak_6266 | 18.94636 | UBE4A_ENSG00000110344                                                 |
| 11 | 118271237 | 1.18E+08 | KD2-H4K8ac_peak_6267 | 11.89502 | RP11-770J1.5_ENSG00000254873;ATP5L_ENSG00000167283                    |
| 11 | 118305462 | 1.18E+08 | KD2-H4K8ac_peak_6268 | 11.24702 | RP11-770J1.4_ENSG00000255384                                          |
| 11 | 118306381 | 1.18E+08 | KD2-H4K8ac_peak_6269 | 14.84212 | RP11-770J1.4_ENSG00000255384;KMT2A_ENSG00000118058                    |
| 11 | 118307240 | 1.18E+08 | KD2-H4K8ac_peak_6270 | 4.06758  | KMT2A_ENSG00000118058                                                 |
| 11 | 118401271 | 1.18E+08 | KD2-H4K8ac_peak_6271 | 12.08081 | RP11-770J1.3_ENSG00000255435;TMEM25_ENSG00000149582                   |
| 11 | 118442520 | 1.18E+08 | KD2-H4K8ac_peak_6272 | 15.96836 | IFT46_ENSG00000118096;ARCN1_ENSG00000095139                           |
| 11 | 118443152 | 1.18E+08 | KD2-H4K8ac_peak_6273 | 13.95627 | IFT46_ENSG00000118096;ARCN1_ENSG00000095139                           |
| 11 | 118478415 | 1.18E+08 | KD2-H4K8ac_peak_6274 | 6.36375  |                                                                       |
| 11 | 118479271 | 1.18E+08 | KD2-H4K8ac_peak_6275 | 5.54647  |                                                                       |
| 11 | 118491503 | 1.18E+08 | KD2-H4K8ac_peak_6276 | 8.2413   |                                                                       |
| 11 | 118492120 | 1.18E+08 | KD2-H4K8ac_peak_6277 | 9.58924  |                                                                       |
| 11 | 118494190 | 1.18E+08 | KD2-H4K8ac_peak_6278 | 5.54647  |                                                                       |
| 11 | 118559870 | 1.19E+08 | KD2-H4K8ac_peak_6279 | 7.36799  | AP002954.6_ENSG00000255239                                            |
| 11 | 118561166 | 1.19E+08 | KD2-H4K8ac_peak_6280 | 8.88082  | AP002954.6_ENSG00000255239                                            |
| 11 | 118575899 | 1.19E+08 | KD2-H4K8ac_peak_6281 | 3.75035  | AP002954.4_ENSG00000255422                                            |
| 11 | 118661073 | 1.19E+08 | KD2-H4K8ac_peak_6282 | 18.54875 | DDX6_ENSG00000110367                                                  |
| 11 | 118778035 | 1.19E+08 | KD2-H4K8ac_peak_6283 | 8.55271  |                                                                       |
| 11 | 118780270 | 1.19E+08 | KD2-H4K8ac_peak_6284 | 11.92978 | MIR4492_ENSG00000264211                                               |
| 11 | 118787057 | 1.19E+08 | KD2-H4K8ac_peak_6285 | 6.56211  |                                                                       |
| 11 | 118789940 | 1.19E+08 | KD2-H4K8ac_peak_6286 | 13.31016 |                                                                       |
| 11 | 118795850 | 1.19E+08 | KD2-H4K8ac_peak_6287 | 9.20193  | BCL9L_ENSG00000186174;UPK2_ENSG00000110375                            |
| 11 | 118800269 | 1.19E+08 | KD2-H4K8ac_peak_6288 | 4.86324  |                                                                       |
| 11 | 118868181 | 1.19E+08 | KD2-H4K8ac_peak_6289 | 6.8836   | RP11-110I1.12_ENSG00000255121;CCDC84_ENSG00000186166                  |
| 11 | 118868929 | 1.19E+08 | KD2-H4K8ac_peak_6290 | 11.28831 | RP11-110I1.12_ENSG00000255121;CCDC84_ENSG00000186166                  |
| 11 | 118888626 | 1.19E+08 | KD2-H4K8ac_peak_6291 | 15.90329 | RPS25_ENSG00000118181;TRAPPC4_ENSG00000196655;MIR3656_ENSG00000266398 |
| 11 | 118889564 | 1.19E+08 | KD2-H4K8ac_peak_6292 | 11.02863 | RPS25_ENSG00000118181;TRAPPC4_ENSG00000196655;MIR3656_ENSG00000266398 |
| 11 | 118900969 | 1.19E+08 | KD2-H4K8ac_peak_6293 | 7.83489  | SLC37A4_ENSG00000137700                                               |
| 11 | 118927387 | 1.19E+08 | KD2-H4K8ac_peak_6294 | 8.30974  | HYOU1_ENSG00000149428                                                 |
| 11 | 118928152 | 1.19E+08 | KD2-H4K8ac_peak_6295 | 13.56049 | HYOU1_ENSG00000149428                                                 |
| 11 | 118955320 | 1.19E+08 | KD2-H4K8ac_peak_6296 | 12.83435 | HMBS_ENSG00000256269                                                  |
| 11 | 118956423 | 1.19E+08 | KD2-H4K8ac_peak_6297 | 6.30626  | HMBS_ENSG00000256269                                                  |
| 11 | 118965082 | 1.19E+08 | KD2-H4K8ac_peak_6298 | 14.98671 | H2AFX_ENSG00000188486                                                 |
| 11 | 118972175 | 1.19E+08 | KD2-H4K8ac_peak_6299 | 10.46264 | C2CD2L_ENSG00000172375                                                |
| 11 | 118973010 | 1.19E+08 | KD2-H4K8ac_peak_6300 | 4.98072  | C2CD2L_ENSG00000172375                                                |

|    |           |          |                      |          |                                                     |
|----|-----------|----------|----------------------|----------|-----------------------------------------------------|
| 11 | 118977643 | 1.19E+08 | KD2-H4K8ac_peak_6301 | 6.65673  |                                                     |
| 11 | 119015217 | 1.19E+08 | KD2-H4K8ac_peak_6302 | 5.88845  |                                                     |
| 11 | 119015894 | 1.19E+08 | KD2-H4K8ac_peak_6303 | 5.71749  |                                                     |
| 11 | 119019603 | 1.19E+08 | KD2-H4K8ac_peak_6304 | 14.48922 | ABCG4_ENSG00000172350                               |
| 11 | 119039462 | 1.19E+08 | KD2-H4K8ac_peak_6305 | 20.96279 |                                                     |
| 11 | 119075871 | 1.19E+08 | KD2-H4K8ac_peak_6306 | 7.47462  | CBL_ENSG00000110395                                 |
| 11 | 119076718 | 1.19E+08 | KD2-H4K8ac_peak_6307 | 9.1707   | CBL_ENSG00000110395                                 |
| 11 | 119187324 | 1.19E+08 | KD2-H4K8ac_peak_6308 | 8.23274  |                                                     |
| 11 | 119208590 | 1.19E+08 | KD2-H4K8ac_peak_6309 | 5.72327  | RP11-334E6.10_ENSG00000245385                       |
| 11 | 119210613 | 1.19E+08 | KD2-H4K8ac_peak_6310 | 12.93209 |                                                     |
| 11 | 119234814 | 1.19E+08 | KD2-H4K8ac_peak_6311 | 13.31016 |                                                     |
| 11 | 119239015 | 1.19E+08 | KD2-H4K8ac_peak_6312 | 5.29555  |                                                     |
| 11 | 119239470 | 1.19E+08 | KD2-H4K8ac_peak_6313 | 11.05467 |                                                     |
| 11 | 119246305 | 1.19E+08 | KD2-H4K8ac_peak_6314 | 8.3261   |                                                     |
| 11 | 119293483 | 1.19E+08 | KD2-H4K8ac_peak_6315 | 5.9696   |                                                     |
| 11 | 119294065 | 1.19E+08 | KD2-H4K8ac_peak_6316 | 9.96798  |                                                     |
| 11 | 119352377 | 1.19E+08 | KD2-H4K8ac_peak_6317 | 5.57044  |                                                     |
| 11 | 119438367 | 1.19E+08 | KD2-H4K8ac_peak_6318 | 8.23274  |                                                     |
| 11 | 119439417 | 1.19E+08 | KD2-H4K8ac_peak_6319 | 7.146    |                                                     |
| 11 | 119455091 | 1.19E+08 | KD2-H4K8ac_peak_6320 | 8.16906  |                                                     |
| 11 | 119514309 | 1.2E+08  | KD2-H4K8ac_peak_6321 | 6.4095   |                                                     |
| 11 | 119541937 | 1.2E+08  | KD2-H4K8ac_peak_6322 | 13.5195  |                                                     |
| 11 | 119555216 | 1.2E+08  | KD2-H4K8ac_peak_6323 | 6.20982  |                                                     |
| 11 | 119564345 | 1.2E+08  | KD2-H4K8ac_peak_6324 | 6.25014  |                                                     |
| 11 | 119570678 | 1.2E+08  | KD2-H4K8ac_peak_6325 | 6.77511  |                                                     |
| 11 | 119572237 | 1.2E+08  | KD2-H4K8ac_peak_6326 | 6.04107  |                                                     |
| 11 | 119573544 | 1.2E+08  | KD2-H4K8ac_peak_6327 | 7.07117  |                                                     |
| 11 | 119579557 | 1.2E+08  | KD2-H4K8ac_peak_6328 | 16.57619 | CTD-2523D13.1_ENSG00000255247                       |
| 11 | 119583472 | 1.2E+08  | KD2-H4K8ac_peak_6329 | 4.93687  |                                                     |
| 11 | 119600363 | 1.2E+08  | KD2-H4K8ac_peak_6330 | 9.34989  | PVRL1_ENSG00000110400;CTD-2523D13.2_ENSG00000254854 |
| 11 | 119613256 | 1.2E+08  | KD2-H4K8ac_peak_6331 | 14.83804 |                                                     |
| 11 | 119634951 | 1.2E+08  | KD2-H4K8ac_peak_6332 | 4.42765  |                                                     |
| 11 | 119650527 | 1.2E+08  | KD2-H4K8ac_peak_6333 | 6.40297  |                                                     |
| 11 | 119660089 | 1.2E+08  | KD2-H4K8ac_peak_6334 | 5.51783  |                                                     |
| 11 | 119702744 | 1.2E+08  | KD2-H4K8ac_peak_6335 | 7.70289  |                                                     |
| 11 | 119734717 | 1.2E+08  | KD2-H4K8ac_peak_6336 | 6.67092  |                                                     |
| 11 | 119745384 | 1.2E+08  | KD2-H4K8ac_peak_6337 | 9.1707   |                                                     |
| 11 | 119759874 | 1.2E+08  | KD2-H4K8ac_peak_6338 | 7.1181   |                                                     |
| 11 | 119761330 | 1.2E+08  | KD2-H4K8ac_peak_6339 | 5.75757  |                                                     |
| 11 | 119762863 | 1.2E+08  | KD2-H4K8ac_peak_6340 | 4.67342  |                                                     |
| 11 | 119764038 | 1.2E+08  | KD2-H4K8ac_peak_6341 | 9.402    |                                                     |
| 11 | 119777945 | 1.2E+08  | KD2-H4K8ac_peak_6342 | 8.42997  |                                                     |
| 11 | 119779286 | 1.2E+08  | KD2-H4K8ac_peak_6343 | 5.88845  |                                                     |
| 11 | 119806557 | 1.2E+08  | KD2-H4K8ac_peak_6344 | 6.2159   |                                                     |
| 11 | 119872170 | 1.2E+08  | KD2-H4K8ac_peak_6345 | 7.27716  |                                                     |
| 11 | 119896132 | 1.2E+08  | KD2-H4K8ac_peak_6346 | 4.42765  |                                                     |

|    |           |          |                      |          |                                                     |
|----|-----------|----------|----------------------|----------|-----------------------------------------------------|
| 11 | 119933142 | 1.2E+08  | KD2-H4K8ac_peak_6347 | 5.04237  |                                                     |
| 11 | 119938542 | 1.2E+08  | KD2-H4K8ac_peak_6348 | 9.89126  |                                                     |
| 11 | 120039488 | 1.2E+08  | KD2-H4K8ac_peak_6349 | 10.94736 | AP000679.2_ENSG00000176984                          |
| 11 | 120055560 | 1.2E+08  | KD2-H4K8ac_peak_6350 | 11.92978 | TRIM29_ENSG00000137699                              |
| 11 | 120056468 | 1.2E+08  | KD2-H4K8ac_peak_6351 | 8.58725  | TRIM29_ENSG00000137699                              |
| 11 | 120058850 | 1.2E+08  | KD2-H4K8ac_peak_6352 | 7.09076  |                                                     |
| 11 | 120063767 | 1.2E+08  | KD2-H4K8ac_peak_6353 | 7.47462  |                                                     |
| 11 | 120080965 | 1.2E+08  | KD2-H4K8ac_peak_6354 | 11.89502 | OAF_ENSG00000184232                                 |
| 11 | 120081544 | 1.2E+08  | KD2-H4K8ac_peak_6355 | 4.54006  | OAF_ENSG00000184232                                 |
| 11 | 120100043 | 1.2E+08  | KD2-H4K8ac_peak_6356 | 6.81873  |                                                     |
| 11 | 120195614 | 1.2E+08  | KD2-H4K8ac_peak_6357 | 10.35678 | TMEM136_ENSG00000181264                             |
| 11 | 120206422 | 1.2E+08  | KD2-H4K8ac_peak_6358 | 14.98671 | ARHGEF12_ENSG00000196914                            |
| 11 | 120207168 | 1.2E+08  | KD2-H4K8ac_peak_6359 | 4.37809  | ARHGEF12_ENSG00000196914                            |
| 11 | 120387519 | 1.2E+08  | KD2-H4K8ac_peak_6360 | 8.17902  |                                                     |
| 11 | 120388106 | 1.2E+08  | KD2-H4K8ac_peak_6361 | 4.42765  |                                                     |
| 11 | 120398071 | 1.2E+08  | KD2-H4K8ac_peak_6362 | 9.65086  |                                                     |
| 11 | 120398634 | 1.2E+08  | KD2-H4K8ac_peak_6363 | 4.38478  |                                                     |
| 11 | 120409458 | 1.2E+08  | KD2-H4K8ac_peak_6364 | 16.93803 |                                                     |
| 11 | 120411616 | 1.2E+08  | KD2-H4K8ac_peak_6365 | 4.44527  |                                                     |
| 11 | 120425211 | 1.2E+08  | KD2-H4K8ac_peak_6366 | 3.75035  |                                                     |
| 11 | 120426103 | 1.2E+08  | KD2-H4K8ac_peak_6367 | 9.65086  |                                                     |
| 11 | 120429751 | 1.2E+08  | KD2-H4K8ac_peak_6368 | 8.09472  |                                                     |
| 11 | 120754584 | 1.21E+08 | KD2-H4K8ac_peak_6369 | 8.02571  |                                                     |
| 11 | 120856570 | 1.21E+08 | KD2-H4K8ac_peak_6370 | 8.37043  |                                                     |
| 11 | 120894869 | 1.21E+08 | KD2-H4K8ac_peak_6371 | 6.84261  | TBCEL_ENSG00000154114                               |
| 11 | 121297753 | 1.21E+08 | KD2-H4K8ac_peak_6372 | 6.66692  | RP11-142I2.1_ENSG00000271022                        |
| 11 | 121317584 | 1.21E+08 | KD2-H4K8ac_peak_6373 | 4.62507  |                                                     |
| 11 | 121322430 | 1.21E+08 | KD2-H4K8ac_peak_6374 | 11.86082 | RP11-730K11.1_ENSG00000246790;SORL1_ENSG00000137642 |
| 11 | 121336961 | 1.21E+08 | KD2-H4K8ac_peak_6375 | 6.67092  |                                                     |
| 11 | 121527195 | 1.22E+08 | KD2-H4K8ac_peak_6376 | 9.90914  |                                                     |
| 11 | 121541878 | 1.22E+08 | KD2-H4K8ac_peak_6377 | 7.47462  |                                                     |
| 11 | 121543262 | 1.22E+08 | KD2-H4K8ac_peak_6378 | 5.73839  |                                                     |
| 11 | 121593002 | 1.22E+08 | KD2-H4K8ac_peak_6379 | 8.55271  |                                                     |
| 11 | 122029539 | 1.22E+08 | KD2-H4K8ac_peak_6380 | 7.12754  |                                                     |
| 11 | 122030046 | 1.22E+08 | KD2-H4K8ac_peak_6381 | 6.16888  |                                                     |
| 11 | 122073893 | 1.22E+08 | KD2-H4K8ac_peak_6382 | 10.0746  |                                                     |
| 11 | 122236715 | 1.22E+08 | KD2-H4K8ac_peak_6383 | 3.75035  |                                                     |
| 11 | 122311225 | 1.22E+08 | KD2-H4K8ac_peak_6384 | 9.1707   |                                                     |
| 11 | 122452194 | 1.22E+08 | KD2-H4K8ac_peak_6385 | 5.43522  |                                                     |
| 11 | 122753372 | 1.23E+08 | KD2-H4K8ac_peak_6386 | 9.36516  | C11orf63_ENSG00000109944                            |
| 11 | 122855193 | 1.23E+08 | KD2-H4K8ac_peak_6387 | 9.96798  |                                                     |
| 11 | 122933407 | 1.23E+08 | KD2-H4K8ac_peak_6388 | 20.5798  | HSPA8_ENSG00000109971                               |
| 11 | 123005640 | 1.23E+08 | KD2-H4K8ac_peak_6389 | 5.15777  |                                                     |
| 11 | 123007392 | 1.23E+08 | KD2-H4K8ac_peak_6390 | 12.06346 | RP11-762B21.5_ENSG00000255342                       |
| 11 | 123008030 | 1.23E+08 | KD2-H4K8ac_peak_6391 | 5.88845  | RP11-762B21.5_ENSG00000255342                       |
| 11 | 123008687 | 1.23E+08 | KD2-H4K8ac_peak_6392 | 5.14125  |                                                     |

|    |           |          |                      |          |                                                       |
|----|-----------|----------|----------------------|----------|-------------------------------------------------------|
| 11 | 123009400 | 1.23E+08 | KD2-H4K8ac_peak_6393 | 9.19305  |                                                       |
| 11 | 123010219 | 1.23E+08 | KD2-H4K8ac_peak_6394 | 9.36516  |                                                       |
| 11 | 123016326 | 1.23E+08 | KD2-H4K8ac_peak_6395 | 5.13615  |                                                       |
| 11 | 123065265 | 1.23E+08 | KD2-H4K8ac_peak_6396 | 15.58442 | CLMP_ENSG00000166250                                  |
| 11 | 123066514 | 1.23E+08 | KD2-H4K8ac_peak_6397 | 11.05407 | CLMP_ENSG00000166250                                  |
| 11 | 123072453 | 1.23E+08 | KD2-H4K8ac_peak_6398 | 8.17902  |                                                       |
| 11 | 123074146 | 1.23E+08 | KD2-H4K8ac_peak_6399 | 10.58496 |                                                       |
| 11 | 123221835 | 1.23E+08 | KD2-H4K8ac_peak_6400 | 9.1707   |                                                       |
| 11 | 123229179 | 1.23E+08 | KD2-H4K8ac_peak_6401 | 10.05606 |                                                       |
| 11 | 123348735 | 1.23E+08 | KD2-H4K8ac_peak_6402 | 9.89126  |                                                       |
| 11 | 123380250 | 1.23E+08 | KD2-H4K8ac_peak_6403 | 6.65673  |                                                       |
| 11 | 123380768 | 1.23E+08 | KD2-H4K8ac_peak_6404 | 5.81222  |                                                       |
| 11 | 123382192 | 1.23E+08 | KD2-H4K8ac_peak_6405 | 6.25869  |                                                       |
| 11 | 123395712 | 1.23E+08 | KD2-H4K8ac_peak_6406 | 8.55271  | GRAMD1B_ENSG00000023171                               |
| 11 | 123431716 | 1.23E+08 | KD2-H4K8ac_peak_6407 | 5.54647  |                                                       |
| 11 | 123525487 | 1.24E+08 | KD2-H4K8ac_peak_6408 | 9.63487  | SCN3B_ENSG00000166257                                 |
| 11 | 123611844 | 1.24E+08 | KD2-H4K8ac_peak_6409 | 11.92978 | ZNF202_ENSG00000166261                                |
| 11 | 124492302 | 1.24E+08 | KD2-H4K8ac_peak_6410 | 5.20998  | TBRG1_ENSG00000154144                                 |
| 11 | 124544125 | 1.25E+08 | KD2-H4K8ac_peak_6411 | 6.66692  | SPA17_ENSG00000064199                                 |
| 11 | 124587953 | 1.25E+08 | KD2-H4K8ac_peak_6412 | 12.79505 |                                                       |
| 11 | 124588791 | 1.25E+08 | KD2-H4K8ac_peak_6413 | 10.08707 |                                                       |
| 11 | 124609380 | 1.25E+08 | KD2-H4K8ac_peak_6414 | 15.53798 | NRGN_ENSG00000154146                                  |
| 11 | 124615898 | 1.25E+08 | KD2-H4K8ac_peak_6415 | 5.90098  | RP11-677M14.2_ENSG00000255045                         |
| 11 | 124632417 | 1.25E+08 | KD2-H4K8ac_peak_6416 | 4.06758  | ESAM_ENSG00000149564                                  |
| 11 | 124670087 | 1.25E+08 | KD2-H4K8ac_peak_6417 | 9.71513  | MSANTD2_ENSG00000120458;RP11-677M14.7_ENSG00000245498 |
| 11 | 124713125 | 1.25E+08 | KD2-H4K8ac_peak_6418 | 11.05467 | AP000866.1_ENSG00000215942                            |
| 11 | 124733121 | 1.25E+08 | KD2-H4K8ac_peak_6419 | 6.40683  |                                                       |
| 11 | 124745902 | 1.25E+08 | KD2-H4K8ac_peak_6420 | 16.33377 |                                                       |
| 11 | 124747003 | 1.25E+08 | KD2-H4K8ac_peak_6421 | 13.44374 |                                                       |
| 11 | 124790941 | 1.25E+08 | KD2-H4K8ac_peak_6422 | 18.54875 |                                                       |
| 11 | 124824084 | 1.25E+08 | KD2-H4K8ac_peak_6423 | 11.75669 | CCDC15_ENSG00000149548                                |
| 11 | 124980934 | 1.25E+08 | KD2-H4K8ac_peak_6424 | 6.83936  | TMEM218_ENSG00000150433                               |
| 11 | 124981920 | 1.25E+08 | KD2-H4K8ac_peak_6425 | 14.29602 | TMEM218_ENSG00000150433;KRT18P59_ENSG00000187686      |
| 11 | 125035260 | 1.25E+08 | KD2-H4K8ac_peak_6426 | 4.8888   | RP11-687M24.5_ENSG00000254880;PKNOX2_ENSG00000165495  |
| 11 | 125132774 | 1.25E+08 | KD2-H4K8ac_peak_6427 | 10.87093 |                                                       |
| 11 | 125274724 | 1.25E+08 | KD2-H4K8ac_peak_6428 | 5.71749  |                                                       |
| 11 | 125303769 | 1.25E+08 | KD2-H4K8ac_peak_6429 | 7.38933  |                                                       |
| 11 | 125321218 | 1.25E+08 | KD2-H4K8ac_peak_6430 | 6.72021  |                                                       |
| 11 | 125364920 | 1.25E+08 | KD2-H4K8ac_peak_6431 | 6.05809  | FEZ1_ENSG00000149557;AP000708.1_ENSG00000255537       |
| 11 | 125365876 | 1.25E+08 | KD2-H4K8ac_peak_6432 | 4.86324  | FEZ1_ENSG00000149557;AP000708.1_ENSG00000255537       |
| 11 | 125438709 | 1.25E+08 | KD2-H4K8ac_peak_6433 | 8.45238  | EI24_ENSG00000149547                                  |
| 11 | 125439415 | 1.25E+08 | KD2-H4K8ac_peak_6434 | 20.88898 | EI24_ENSG00000149547                                  |
| 11 | 125461162 | 1.25E+08 | KD2-H4K8ac_peak_6435 | 6.2781   | STT3A_ENSG00000134910                                 |
| 11 | 125461651 | 1.25E+08 | KD2-H4K8ac_peak_6436 | 4.42765  | STT3A-AS1_ENSG00000254671;STT3A_ENSG00000134910       |
| 11 | 125462882 | 1.25E+08 | KD2-H4K8ac_peak_6437 | 6.05809  | STT3A-AS1_ENSG00000254671                             |
| 11 | 125495151 | 1.25E+08 | KD2-H4K8ac_peak_6438 | 18.5703  | CHEK1_ENSG00000149554                                 |



|    |           |          |                      |          |                                                                                |
|----|-----------|----------|----------------------|----------|--------------------------------------------------------------------------------|
| 11 | 125757027 | 1.26E+08 | KD2-H4K8ac_peak_6439 | 33.81557 |                                                                                |
| 11 | 125820122 | 1.26E+08 | KD2-H4K8ac_peak_6440 | 11.04256 | RP11-680F20.6_ENSG00000254967                                                  |
| 11 | 125821707 | 1.26E+08 | KD2-H4K8ac_peak_6441 | 7.27281  |                                                                                |
| 11 | 125823278 | 1.26E+08 | KD2-H4K8ac_peak_6442 | 10.46874 |                                                                                |
| 11 | 125932311 | 1.26E+08 | KD2-H4K8ac_peak_6443 | 7.40314  | CDON_ENSG00000064309                                                           |
| 11 | 125934087 | 1.26E+08 | KD2-H4K8ac_peak_6444 | 7.83489  | CDON_ENSG00000064309                                                           |
| 11 | 125949479 | 1.26E+08 | KD2-H4K8ac_peak_6445 | 10.90543 |                                                                                |
| 11 | 125950317 | 1.26E+08 | KD2-H4K8ac_peak_6446 | 8.10216  |                                                                                |
| 11 | 125950866 | 1.26E+08 | KD2-H4K8ac_peak_6447 | 8.26945  |                                                                                |
| 11 | 125951302 | 1.26E+08 | KD2-H4K8ac_peak_6448 | 6.25869  |                                                                                |
| 11 | 125953728 | 1.26E+08 | KD2-H4K8ac_peak_6449 | 8.19585  |                                                                                |
| 11 | 125954179 | 1.26E+08 | KD2-H4K8ac_peak_6450 | 5.54647  |                                                                                |
| 11 | 125980476 | 1.26E+08 | KD2-H4K8ac_peak_6451 | 9.36516  |                                                                                |
| 11 | 125981733 | 1.26E+08 | KD2-H4K8ac_peak_6452 | 12.82393 |                                                                                |
| 11 | 125982728 | 1.26E+08 | KD2-H4K8ac_peak_6453 | 13.86993 |                                                                                |
| 11 | 125983921 | 1.26E+08 | KD2-H4K8ac_peak_6454 | 22.4399  |                                                                                |
| 11 | 125985331 | 1.26E+08 | KD2-H4K8ac_peak_6455 | 15.69572 |                                                                                |
| 11 | 126011184 | 1.26E+08 | KD2-H4K8ac_peak_6456 | 16.07006 |                                                                                |
| 11 | 126081024 | 1.26E+08 | KD2-H4K8ac_peak_6457 | 5.1707   | RPUSD4_ENSG00000165526;FAM118B_ENSG00000197798                                 |
| 11 | 126152321 | 1.26E+08 | KD2-H4K8ac_peak_6458 | 13.73635 | snoU13_ENSG00000238855;TIRAP_ENSG00000150455                                   |
| 11 | 126173489 | 1.26E+08 | KD2-H4K8ac_peak_6459 | 9.95119  | RP11-712L6.5_ENSG00000255062;DCPS_ENSG00000110063                              |
| 11 | 126174738 | 1.26E+08 | KD2-H4K8ac_peak_6460 | 3.97079  | RP11-712L6.5_ENSG00000255062                                                   |
| 11 | 126224784 | 1.26E+08 | KD2-H4K8ac_peak_6461 | 15.74255 | ST3GAL4_ENSG00000110080                                                        |
| 11 | 126256141 | 1.26E+08 | KD2-H4K8ac_peak_6462 | 8.88549  |                                                                                |
| 11 | 126263022 | 1.26E+08 | KD2-H4K8ac_peak_6463 | 4.9025   |                                                                                |
| 11 | 126350394 | 1.26E+08 | KD2-H4K8ac_peak_6464 | 14.99434 |                                                                                |
| 11 | 126382738 | 1.26E+08 | KD2-H4K8ac_peak_6465 | 8.02571  |                                                                                |
| 11 | 126383352 | 1.26E+08 | KD2-H4K8ac_peak_6466 | 3.90565  |                                                                                |
| 11 | 126388558 | 1.26E+08 | KD2-H4K8ac_peak_6467 | 9.16531  |                                                                                |
| 11 | 126391070 | 1.26E+08 | KD2-H4K8ac_peak_6468 | 7.26089  |                                                                                |
| 11 | 126413613 | 1.26E+08 | KD2-H4K8ac_peak_6469 | 9.76863  | KIRREL3-AS1_ENSG00000257271                                                    |
| 11 | 126455282 | 1.26E+08 | KD2-H4K8ac_peak_6470 | 8.5781   |                                                                                |
| 11 | 126859994 | 1.27E+08 | KD2-H4K8ac_peak_6471 | 5.72327  |                                                                                |
| 11 | 126873103 | 1.27E+08 | KD2-H4K8ac_peak_6472 | 5.88845  | KIRREL3_ENSG00000149571;KIRREL3-AS3_ENSG00000218109;AP002833.1_ENSG00000256527 |
| 11 | 126951728 | 1.27E+08 | KD2-H4K8ac_peak_6473 | 5.19569  |                                                                                |
| 11 | 127063579 | 1.27E+08 | KD2-H4K8ac_peak_6474 | 12.36249 |                                                                                |
| 11 | 127065384 | 1.27E+08 | KD2-H4K8ac_peak_6475 | 6.44277  |                                                                                |
| 11 | 127321592 | 1.27E+08 | KD2-H4K8ac_peak_6476 | 7.79558  |                                                                                |
| 11 | 127330926 | 1.27E+08 | KD2-H4K8ac_peak_6477 | 9.15329  |                                                                                |
| 11 | 128049346 | 1.28E+08 | KD2-H4K8ac_peak_6478 | 8.1718   | RP11-702B10.2_ENSG00000273415                                                  |
| 11 | 128104517 | 1.28E+08 | KD2-H4K8ac_peak_6479 | 10.1591  |                                                                                |
| 11 | 128105006 | 1.28E+08 | KD2-H4K8ac_peak_6480 | 6.40683  |                                                                                |
| 11 | 128106805 | 1.28E+08 | KD2-H4K8ac_peak_6481 | 17.84477 |                                                                                |
| 11 | 128116645 | 1.28E+08 | KD2-H4K8ac_peak_6482 | 15.22643 |                                                                                |
| 11 | 128160254 | 1.28E+08 | KD2-H4K8ac_peak_6483 | 9.11031  |                                                                                |
| 11 | 128261409 | 1.28E+08 | KD2-H4K8ac_peak_6484 | 6.8836   |                                                                                |

|    |           |          |                      |          |                                                      |
|----|-----------|----------|----------------------|----------|------------------------------------------------------|
| 11 | 128262391 | 1.28E+08 | KD2-H4K8ac_peak_6485 | 6.31143  |                                                      |
| 11 | 128290292 | 1.28E+08 | KD2-H4K8ac_peak_6486 | 6.99815  |                                                      |
| 11 | 128291765 | 1.28E+08 | KD2-H4K8ac_peak_6487 | 8.26945  |                                                      |
| 11 | 128292980 | 1.28E+08 | KD2-H4K8ac_peak_6488 | 5.98124  |                                                      |
| 11 | 128294424 | 1.28E+08 | KD2-H4K8ac_peak_6489 | 5.45396  |                                                      |
| 11 | 128325502 | 1.28E+08 | KD2-H4K8ac_peak_6490 | 7.70289  |                                                      |
| 11 | 128376572 | 1.28E+08 | KD2-H4K8ac_peak_6491 | 6.00226  |                                                      |
| 11 | 128391588 | 1.28E+08 | KD2-H4K8ac_peak_6492 | 12.78794 |                                                      |
| 11 | 128392529 | 1.28E+08 | KD2-H4K8ac_peak_6493 | 12.79505 |                                                      |
| 11 | 128480972 | 1.28E+08 | KD2-H4K8ac_peak_6494 | 7.72801  |                                                      |
| 11 | 128646776 | 1.29E+08 | KD2-H4K8ac_peak_6495 | 8.17902  |                                                      |
| 11 | 128765610 | 1.29E+08 | KD2-H4K8ac_peak_6496 | 5.34946  |                                                      |
| 11 | 128774944 | 1.29E+08 | KD2-H4K8ac_peak_6497 | 11.8457  | C11orf45_ENSG00000174370                             |
| 11 | 129149662 | 1.29E+08 | KD2-H4K8ac_peak_6498 | 10.65724 | ARHGAP32_ENSG00000134909                             |
| 11 | 129685809 | 1.3E+08  | KD2-H4K8ac_peak_6499 | 15.61313 | TMEM45B_ENSG00000151715                              |
| 11 | 129765009 | 1.3E+08  | KD2-H4K8ac_peak_6500 | 8.02571  | NFRKB_ENSG00000170322                                |
| 11 | 129838738 | 1.3E+08  | KD2-H4K8ac_peak_6501 | 8.79557  |                                                      |
| 11 | 129871507 | 1.3E+08  | KD2-H4K8ac_peak_6502 | 13.87818 | PRDM10_ENSG00000170325;LINC00167_ENSG00000233220     |
| 11 | 129938512 | 1.3E+08  | KD2-H4K8ac_peak_6503 | 10.96455 | APLP2_ENSG00000084234                                |
| 11 | 130083181 | 1.3E+08  | KD2-H4K8ac_peak_6504 | 9.11031  |                                                      |
| 11 | 130185089 | 1.3E+08  | KD2-H4K8ac_peak_6505 | 8.55271  | ZBTB44_ENSG00000196323;RP11-121M22.1_ENSG00000175773 |
| 11 | 130785760 | 1.31E+08 | KD2-H4K8ac_peak_6506 | 16.49944 | SNX19_ENSG00000120451                                |
| 11 | 130786614 | 1.31E+08 | KD2-H4K8ac_peak_6507 | 5.57044  | SNX19_ENSG00000120451                                |
| 11 | 132640559 | 1.33E+08 | KD2-H4K8ac_peak_6508 | 10.21502 |                                                      |
| 11 | 132662355 | 1.33E+08 | KD2-H4K8ac_peak_6509 | 10.63441 |                                                      |
| 11 | 133096954 | 1.33E+08 | KD2-H4K8ac_peak_6510 | 5.54647  |                                                      |
| 11 | 133798418 | 1.34E+08 | KD2-H4K8ac_peak_6511 | 5.14125  |                                                      |
| 11 | 133799205 | 1.34E+08 | KD2-H4K8ac_peak_6512 | 5.30799  |                                                      |
| 11 | 133804683 | 1.34E+08 | KD2-H4K8ac_peak_6513 | 6.58902  |                                                      |
| 11 | 133805195 | 1.34E+08 | KD2-H4K8ac_peak_6514 | 26.99824 |                                                      |
| 11 | 133807226 | 1.34E+08 | KD2-H4K8ac_peak_6515 | 3.82509  |                                                      |
| 11 | 133815785 | 1.34E+08 | KD2-H4K8ac_peak_6516 | 13.9152  |                                                      |
| 11 | 133816989 | 1.34E+08 | KD2-H4K8ac_peak_6517 | 9.65086  |                                                      |
| 11 | 133827259 | 1.34E+08 | KD2-H4K8ac_peak_6518 | 11.92978 | IGSF9B_ENSG00000080854;AP000911.1_ENSG00000264674    |
| 11 | 133836120 | 1.34E+08 | KD2-H4K8ac_peak_6519 | 4.67342  |                                                      |
| 11 | 133902596 | 1.34E+08 | KD2-H4K8ac_peak_6520 | 5.13615  | RP11-713P17.3_ENSG00000204241                        |
| 11 | 133903574 | 1.34E+08 | KD2-H4K8ac_peak_6521 | 10.99466 |                                                      |
| 11 | 133904221 | 1.34E+08 | KD2-H4K8ac_peak_6522 | 11.72064 |                                                      |
| 11 | 133907015 | 1.34E+08 | KD2-H4K8ac_peak_6523 | 4.28151  | RP11-713P17.4_ENSG00000254648                        |
| 11 | 133910388 | 1.34E+08 | KD2-H4K8ac_peak_6524 | 5.66317  |                                                      |
| 11 | 133990902 | 1.34E+08 | KD2-H4K8ac_peak_6525 | 6.76298  |                                                      |
| 11 | 134093549 | 1.34E+08 | KD2-H4K8ac_peak_6526 | 6.40683  | VPS26B_ENSG00000151502                               |
| 11 | 134094146 | 1.34E+08 | KD2-H4K8ac_peak_6527 | 9.16531  | NCAPD3_ENSG00000151503;VPS26B_ENSG00000151502        |
| 11 | 134094621 | 1.34E+08 | KD2-H4K8ac_peak_6528 | 13.70753 | NCAPD3_ENSG00000151503;VPS26B_ENSG00000151502        |
| 11 | 134095337 | 1.34E+08 | KD2-H4K8ac_peak_6529 | 5.88845  | NCAPD3_ENSG00000151503;VPS26B_ENSG00000151502        |
| 11 | 134123523 | 1.34E+08 | KD2-H4K8ac_peak_6530 | 4.98072  | THYN1_ENSG00000151500;ACAD8_ENSG00000151498          |

|    |           |          |                      |          |                                                                         |
|----|-----------|----------|----------------------|----------|-------------------------------------------------------------------------|
| 11 | 134202012 | 1.34E+08 | KD2-H4K8ac_peak_6531 | 11.43863 |                                                                         |
| 11 | 134281636 | 1.34E+08 | KD2-H4K8ac_peak_6532 | 8.30974  | B3GAT1_ENSG00000109956                                                  |
| 11 | 134874150 | 1.35E+08 | KD2-H4K8ac_peak_6533 | 8.41122  |                                                                         |
| 11 | 134874820 | 1.35E+08 | KD2-H4K8ac_peak_6534 | 9.73163  |                                                                         |
| 11 | 134878545 | 1.35E+08 | KD2-H4K8ac_peak_6535 | 7.12754  |                                                                         |
| 12 | 73753     | 74083    | KD2-H4K8ac_peak_6536 | 25.98527 | AC215219.1_ENSG00000238823;ABC7-42389800N19.1_ENSG00000226210           |
| 12 | 79861     | 80118    | KD2-H4K8ac_peak_6537 | 5.13615  |                                                                         |
| 12 | 187115    | 187571   | KD2-H4K8ac_peak_6538 | 12.41575 |                                                                         |
| 12 | 262149    | 262350   | KD2-H4K8ac_peak_6539 | 5.51783  |                                                                         |
| 12 | 275223    | 275475   | KD2-H4K8ac_peak_6540 | 7.47462  | RP11-598F7.5_ENSG00000256694                                            |
| 12 | 281570    | 282177   | KD2-H4K8ac_peak_6541 | 6.65673  |                                                                         |
| 12 | 283613    | 283987   | KD2-H4K8ac_peak_6542 | 9.20193  |                                                                         |
| 12 | 284184    | 284464   | KD2-H4K8ac_peak_6543 | 7.95563  |                                                                         |
| 12 | 284854    | 285502   | KD2-H4K8ac_peak_6544 | 7.70067  |                                                                         |
| 12 | 286513    | 287001   | KD2-H4K8ac_peak_6545 | 8.4716   |                                                                         |
| 12 | 288131    | 288368   | KD2-H4K8ac_peak_6546 | 4.95872  |                                                                         |
| 12 | 297721    | 298364   | KD2-H4K8ac_peak_6547 | 17.19888 |                                                                         |
| 12 | 312463    | 312904   | KD2-H4K8ac_peak_6548 | 7.76329  | RP11-283I3.2_ENSG00000256577                                            |
| 12 | 313208    | 313646   | KD2-H4K8ac_peak_6549 | 4.54006  | RP11-283I3.2_ENSG00000256577                                            |
| 12 | 329314    | 329526   | KD2-H4K8ac_peak_6550 | 5.82799  |                                                                         |
| 12 | 510165    | 510428   | KD2-H4K8ac_peak_6551 | 8.37231  |                                                                         |
| 12 | 678616    | 678980   | KD2-H4K8ac_peak_6552 | 9.36516  |                                                                         |
| 12 | 679220    | 680004   | KD2-H4K8ac_peak_6553 | 15.47237 |                                                                         |
| 12 | 684524    | 684725   | KD2-H4K8ac_peak_6554 | 8.1718   |                                                                         |
| 12 | 685015    | 685885   | KD2-H4K8ac_peak_6555 | 21.26856 |                                                                         |
| 12 | 699640    | 699900   | KD2-H4K8ac_peak_6556 | 7.44366  | RNU7-103P_ENSG00000238370;RP5-1154L15.1_ENSG00000255825                 |
| 12 | 700243    | 700684   | KD2-H4K8ac_peak_6557 | 7.40111  | RP5-1154L15.1_ENSG00000255825                                           |
| 12 | 701566    | 701865   | KD2-H4K8ac_peak_6558 | 8.59579  |                                                                         |
| 12 | 719275    | 719642   | KD2-H4K8ac_peak_6559 | 5.14125  |                                                                         |
| 12 | 752166    | 752527   | KD2-H4K8ac_peak_6560 | 11.09837 |                                                                         |
| 12 | 1057802   | 1058004  | KD2-H4K8ac_peak_6561 | 7.15405  |                                                                         |
| 12 | 1058374   | 1058807  | KD2-H4K8ac_peak_6562 | 19.03298 |                                                                         |
| 12 | 1059276   | 1059569  | KD2-H4K8ac_peak_6563 | 6.65673  |                                                                         |
| 12 | 1099712   | 1099966  | KD2-H4K8ac_peak_6564 | 11.04256 | RAD52_ENSG0000002016;RP11-359B12.2_ENSG00000250132;ERC1_ENSG00000082805 |
| 12 | 1164146   | 1164509  | KD2-H4K8ac_peak_6565 | 6.16888  |                                                                         |
| 12 | 1393829   | 1394102  | KD2-H4K8ac_peak_6566 | 6.16888  |                                                                         |
| 12 | 1639074   | 1639481  | KD2-H4K8ac_peak_6567 | 7.36799  | WNT5B_ENSG00000111186                                                   |
| 12 | 1703088   | 1703509  | KD2-H4K8ac_peak_6568 | 6.99815  | FBXL14_ENSG00000171823                                                  |
| 12 | 1703789   | 1704258  | KD2-H4K8ac_peak_6569 | 10.46264 | FBXL14_ENSG00000171823                                                  |
| 12 | 1738555   | 1738865  | KD2-H4K8ac_peak_6570 | 16.61426 |                                                                         |
| 12 | 1739137   | 1739892  | KD2-H4K8ac_peak_6571 | 11.05467 |                                                                         |
| 12 | 1770686   | 1770914  | KD2-H4K8ac_peak_6572 | 8.10216  |                                                                         |
| 12 | 1771127   | 1771484  | KD2-H4K8ac_peak_6573 | 7.70289  |                                                                         |
| 12 | 1799720   | 1799928  | KD2-H4K8ac_peak_6574 | 7.95563  |                                                                         |
| 12 | 1800324   | 1800632  | KD2-H4K8ac_peak_6575 | 7.1181   |                                                                         |
| 12 | 1905499   | 1906103  | KD2-H4K8ac_peak_6576 | 13.73635 |                                                                         |

|    |         |         |                      |          |                                                                    |
|----|---------|---------|----------------------|----------|--------------------------------------------------------------------|
| 12 | 1913926 | 1914569 | KD2-H4K8ac_peak_6577 | 18.41034 |                                                                    |
| 12 | 1914775 | 1915078 | KD2-H4K8ac_peak_6578 | 4.37815  |                                                                    |
| 12 | 1935887 | 1936176 | KD2-H4K8ac_peak_6579 | 5.86783  |                                                                    |
| 12 | 1944955 | 1945714 | KD2-H4K8ac_peak_6580 | 6.40297  |                                                                    |
| 12 | 1946216 | 1946943 | KD2-H4K8ac_peak_6581 | 4.44527  |                                                                    |
| 12 | 1947946 | 1948168 | KD2-H4K8ac_peak_6582 | 5.66705  |                                                                    |
| 12 | 2113143 | 2113573 | KD2-H4K8ac_peak_6583 | 11.04256 | DCP1B_ENSG00000151065;RP5-1096D14.6_ENSG00000203593                |
| 12 | 2123753 | 2124129 | KD2-H4K8ac_peak_6584 | 5.45396  |                                                                    |
| 12 | 2144351 | 2144609 | KD2-H4K8ac_peak_6585 | 4.91674  |                                                                    |
| 12 | 2162190 | 2162741 | KD2-H4K8ac_peak_6586 | 7.27716  |                                                                    |
| 12 | 2348779 | 2348997 | KD2-H4K8ac_peak_6587 | 6.25014  |                                                                    |
| 12 | 2392752 | 2393385 | KD2-H4K8ac_peak_6588 | 7.9076   |                                                                    |
| 12 | 2393578 | 2393983 | KD2-H4K8ac_peak_6589 | 6.2781   |                                                                    |
| 12 | 2692409 | 2692769 | KD2-H4K8ac_peak_6590 | 5.61067  |                                                                    |
| 12 | 2903316 | 2903707 | KD2-H4K8ac_peak_6591 | 5.9696   | CBX3P4_ENSG00000256030;FKBP4_ENSG00000004478                       |
| 12 | 2904271 | 2904988 | KD2-H4K8ac_peak_6592 | 5.9696   | CBX3P4_ENSG00000256030;FKBP4_ENSG00000004478                       |
| 12 | 2921855 | 2922049 | KD2-H4K8ac_peak_6593 | 10.43145 | RP4-816N1.6_ENSG00000258325;ITFG2_ENSG00000111203                  |
| 12 | 2985799 | 2986101 | KD2-H4K8ac_peak_6594 | 4.44527  | FOXMI1_ENSG00000111206;RHNO1_ENSG00000171792;TULP3_ENSG00000078246 |
| 12 | 2986474 | 2986826 | KD2-H4K8ac_peak_6595 | 11.34353 | FOXMI1_ENSG00000111206;TULP3_ENSG00000078246                       |
| 12 | 2999188 | 2999804 | KD2-H4K8ac_peak_6596 | 11.50346 |                                                                    |
| 12 | 3067904 | 3068868 | KD2-H4K8ac_peak_6597 | 5.54647  | TEAD4_ENSG00000197905                                              |
| 12 | 3112811 | 3113160 | KD2-H4K8ac_peak_6598 | 8.09472  |                                                                    |
| 12 | 3138293 | 3138606 | KD2-H4K8ac_peak_6599 | 3.85282  |                                                                    |
| 12 | 3185945 | 3186361 | KD2-H4K8ac_peak_6600 | 7.76104  | TSPAN9_ENSG00000011105                                             |
| 12 | 3212822 | 3213279 | KD2-H4K8ac_peak_6601 | 10.46264 |                                                                    |
| 12 | 3213625 | 3213860 | KD2-H4K8ac_peak_6602 | 6.16747  |                                                                    |
| 12 | 3214422 | 3214882 | KD2-H4K8ac_peak_6603 | 20.02161 |                                                                    |
| 12 | 3216553 | 3216928 | KD2-H4K8ac_peak_6604 | 9.11031  |                                                                    |
| 12 | 3313535 | 3313885 | KD2-H4K8ac_peak_6605 | 9.33795  |                                                                    |
| 12 | 3325786 | 3325985 | KD2-H4K8ac_peak_6606 | 4.8888   |                                                                    |
| 12 | 3327528 | 3327781 | KD2-H4K8ac_peak_6607 | 9.11031  |                                                                    |
| 12 | 3328479 | 3328715 | KD2-H4K8ac_peak_6608 | 8.4084   |                                                                    |
| 12 | 3333484 | 3333739 | KD2-H4K8ac_peak_6609 | 8.94469  |                                                                    |
| 12 | 3390197 | 3391054 | KD2-H4K8ac_peak_6610 | 15.039   |                                                                    |
| 12 | 3474862 | 3475111 | KD2-H4K8ac_peak_6611 | 6.36375  |                                                                    |
| 12 | 3713450 | 3714176 | KD2-H4K8ac_peak_6612 | 5.30799  |                                                                    |
| 12 | 3861842 | 3862598 | KD2-H4K8ac_peak_6613 | 26.59781 |                                                                    |
| 12 | 3862861 | 3863323 | KD2-H4K8ac_peak_6614 | 4.42765  |                                                                    |
| 12 | 3981672 | 3982149 | KD2-H4K8ac_peak_6615 | 8.02571  | PARP11_ENSG00000111224;RP11-664D1.1_ENSG00000256862                |
| 12 | 4429758 | 4429966 | KD2-H4K8ac_peak_6616 | 8.1233   | C12orf5_ENSG00000078237                                            |
| 12 | 4430452 | 4430694 | KD2-H4K8ac_peak_6617 | 7.36799  | C12orf5_ENSG00000078237                                            |
| 12 | 4524597 | 4524796 | KD2-H4K8ac_peak_6618 | 4.44923  |                                                                    |
| 12 | 4526679 | 4527059 | KD2-H4K8ac_peak_6619 | 7.47462  |                                                                    |
| 12 | 4550500 | 4550907 | KD2-H4K8ac_peak_6620 | 4.42765  |                                                                    |
| 12 | 4714136 | 4714372 | KD2-H4K8ac_peak_6621 | 10.63441 | RP11-500M8.7_ENSG00000272921                                       |
| 12 | 4757703 | 4758103 | KD2-H4K8ac_peak_6622 | 6.25869  | AKAP3_ENSG00000111254;NDUFA9_ENSG00000139180                       |

|    |         |         |                      |          |                                                   |
|----|---------|---------|----------------------|----------|---------------------------------------------------|
| 12 | 4758423 | 4758719 | KD2-H4K8ac_peak_6623 | 4.211    | AKAP3_ENSG00000111254;NDUFA9_ENSG00000139180      |
| 12 | 6194157 | 6194407 | KD2-H4K8ac_peak_6624 | 5.88845  |                                                   |
| 12 | 6223808 | 6224017 | KD2-H4K8ac_peak_6625 | 9.35804  |                                                   |
| 12 | 6267550 | 6267771 | KD2-H4K8ac_peak_6626 | 7.45501  |                                                   |
| 12 | 6290825 | 6291431 | KD2-H4K8ac_peak_6627 | 7.47462  |                                                   |
| 12 | 6291625 | 6292023 | KD2-H4K8ac_peak_6628 | 12.06346 |                                                   |
| 12 | 6305040 | 6305446 | KD2-H4K8ac_peak_6629 | 8.62078  |                                                   |
| 12 | 6309050 | 6309296 | KD2-H4K8ac_peak_6630 | 9.63487  | CD9_ENSG0000010278                                |
| 12 | 6356501 | 6356871 | KD2-H4K8ac_peak_6631 | 12.27142 |                                                   |
| 12 | 6387226 | 6387999 | KD2-H4K8ac_peak_6632 | 25.71759 |                                                   |
| 12 | 6388226 | 6388466 | KD2-H4K8ac_peak_6633 | 6.13909  |                                                   |
| 12 | 6426814 | 6427040 | KD2-H4K8ac_peak_6634 | 5.10276  |                                                   |
| 12 | 6450915 | 6451143 | KD2-H4K8ac_peak_6635 | 5.29352  | TNFRSF1A_ENSG00000067182                          |
| 12 | 6560164 | 6560575 | KD2-H4K8ac_peak_6636 | 11.86082 | CD27-AS1_ENSG00000215039;TAPBPL_ENSG00000139192   |
| 12 | 6560774 | 6561458 | KD2-H4K8ac_peak_6637 | 6.99815  | CD27-AS1_ENSG00000215039;TAPBPL_ENSG00000139192   |
| 12 | 6580036 | 6580823 | KD2-H4K8ac_peak_6638 | 9.402    | VAMP1_ENSG00000139190                             |
| 12 | 6602022 | 6602319 | KD2-H4K8ac_peak_6639 | 9.1707   | MRPL51_ENSG00000111639;NCAPD2_ENSG00000010292     |
| 12 | 6602660 | 6602883 | KD2-H4K8ac_peak_6640 | 9.6247   | MRPL51_ENSG00000111639;NCAPD2_ENSG00000010292     |
| 12 | 6642543 | 6643437 | KD2-H4K8ac_peak_6641 | 31.33361 | RP5-940J5.3_ENSG00000255966;GAPDH_ENSG00000111640 |
| 12 | 6643782 | 6644164 | KD2-H4K8ac_peak_6642 | 7.95563  | GAPDH_ENSG00000111640                             |
| 12 | 6644683 | 6644924 | KD2-H4K8ac_peak_6643 | 5.75452  |                                                   |
| 12 | 6677690 | 6678163 | KD2-H4K8ac_peak_6644 | 11.24702 | NOP2_ENSG00000111641                              |
| 12 | 6716307 | 6716525 | KD2-H4K8ac_peak_6645 | 16.32216 | CHD4_ENSG00000111642                              |
| 12 | 6717696 | 6718363 | KD2-H4K8ac_peak_6646 | 5.30799  |                                                   |
| 12 | 6721615 | 6722087 | KD2-H4K8ac_peak_6647 | 8.83582  |                                                   |
| 12 | 6722453 | 6722794 | KD2-H4K8ac_peak_6648 | 43.30787 |                                                   |
| 12 | 6723197 | 6723830 | KD2-H4K8ac_peak_6649 | 14.68449 |                                                   |
| 12 | 6741815 | 6742084 | KD2-H4K8ac_peak_6650 | 5.84991  |                                                   |
| 12 | 6771616 | 6771906 | KD2-H4K8ac_peak_6651 | 8.17902  | ING4_ENSG00000111653;RP4-761J14.8_ENSG00000219410 |
| 12 | 6772726 | 6773443 | KD2-H4K8ac_peak_6652 | 5.88845  | ING4_ENSG00000111653;RP4-761J14.8_ENSG00000219410 |
| 12 | 6797698 | 6798558 | KD2-H4K8ac_peak_6653 | 34.98954 | ZNF384_ENSG00000126746                            |
| 12 | 6808938 | 6810401 | KD2-H4K8ac_peak_6654 | 20.15307 | PIANP_ENSG00000139200                             |
| 12 | 6833661 | 6833861 | KD2-H4K8ac_peak_6655 | 4.86324  | COPS7A_ENSG00000111652                            |
| 12 | 6862384 | 6862643 | KD2-H4K8ac_peak_6656 | 9.63487  |                                                   |
| 12 | 6872678 | 6873495 | KD2-H4K8ac_peak_6657 | 10.7186  |                                                   |
| 12 | 6874752 | 6875211 | KD2-H4K8ac_peak_6658 | 12.17278 | PTMS_ENSG00000159335                              |
| 12 | 6876265 | 6876654 | KD2-H4K8ac_peak_6659 | 5.07021  | MLF2_ENSG00000089693                              |
| 12 | 6937651 | 6938173 | KD2-H4K8ac_peak_6660 | 5.59859  | LEPREL2_ENSG00000110811                           |
| 12 | 6938523 | 6938775 | KD2-H4K8ac_peak_6661 | 4.06758  | LEPREL2_ENSG00000110811                           |
| 12 | 6976005 | 6976491 | KD2-H4K8ac_peak_6662 | 7.27716  | TPII_ENSG00000111669                              |
| 12 | 6976747 | 6977194 | KD2-H4K8ac_peak_6663 | 16.63953 | TPII_ENSG00000111669                              |
| 12 | 6982209 | 6982452 | KD2-H4K8ac_peak_6664 | 6.56211  | RPL13P5_ENSG00000240370;LRRC23_ENSG00000010626    |
| 12 | 6982745 | 6982953 | KD2-H4K8ac_peak_6665 | 6.66692  | RPL13P5_ENSG00000240370;LRRC23_ENSG00000010626    |
| 12 | 7000584 | 7000907 | KD2-H4K8ac_peak_6666 | 14.27217 |                                                   |
| 12 | 7022936 | 7024017 | KD2-H4K8ac_peak_6667 | 18.5703  | ENO2_ENSG00000111674                              |
| 12 | 7024408 | 7024732 | KD2-H4K8ac_peak_6668 | 5.45396  |                                                   |

|    |          |          |                      |          |                                                                                                        |
|----|----------|----------|----------------------|----------|--------------------------------------------------------------------------------------------------------|
| 12 | 7033768  | 7034213  | KD2-H4K8ac_peak_6669 | 4.67342  | ATN1_ENSG00000111676                                                                                   |
| 12 | 7034729  | 7035289  | KD2-H4K8ac_peak_6670 | 7.47462  |                                                                                                        |
| 12 | 7036567  | 7037107  | KD2-H4K8ac_peak_6671 | 14.15075 |                                                                                                        |
| 12 | 7046068  | 7047191  | KD2-H4K8ac_peak_6672 | 23.38267 |                                                                                                        |
| 12 | 7052339  | 7052661  | KD2-H4K8ac_peak_6673 | 14.48084 | C12orf57_ENSG00000111678;RNU7-1_ENSG00000238923                                                        |
| 12 | 7053206  | 7053823  | KD2-H4K8ac_peak_6674 | 13.80019 | U47924.31_ENSG00000272173;RNU7-1_ENSG00000238923                                                       |
| 12 | 7070959  | 7071823  | KD2-H4K8ac_peak_6675 | 9.36516  | EMG1_ENSG00000126749;U47924.27_ENSG00000257084                                                         |
| 12 | 7074021  | 7074220  | KD2-H4K8ac_peak_6676 | 5.90414  | MIR141_ENSG00000207708;U47924.29_ENSG00000271969                                                       |
| 12 | 7079225  | 7079785  | KD2-H4K8ac_peak_6677 | 15.13261 | PHB2_ENSG00000215021                                                                                   |
| 12 | 7125921  | 7126133  | KD2-H4K8ac_peak_6678 | 8.10216  | LPCAT3_ENSG00000111684                                                                                 |
| 12 | 7244973  | 7245169  | KD2-H4K8ac_peak_6679 | 8.74596  | C1R_ENSG00000159403                                                                                    |
| 12 | 7341826  | 7342128  | KD2-H4K8ac_peak_6680 | 11.92978 | RP11-273B20.3_ENSG00000255572;PEX5_ENSG00000139197                                                     |
| 12 | 7342351  | 7342544  | KD2-H4K8ac_peak_6681 | 7.95563  | RP11-273B20.3_ENSG00000255572                                                                          |
| 12 | 7521914  | 7522272  | KD2-H4K8ac_peak_6682 | 6.16888  |                                                                                                        |
| 12 | 8179518  | 8180031  | KD2-H4K8ac_peak_6683 | 8.23274  |                                                                                                        |
| 12 | 8185675  | 8186038  | KD2-H4K8ac_peak_6684 | 4.67342  | FOXJ2_ENSG00000065970                                                                                  |
| 12 | 8332899  | 8333252  | KD2-H4K8ac_peak_6685 | 11.24702 | FAM66C_ENSG00000226711                                                                                 |
| 12 | 8396401  | 8396695  | KD2-H4K8ac_peak_6686 | 3.82395  | FAM86FP_ENSG00000164845                                                                                |
| 12 | 8849851  | 8851101  | KD2-H4K8ac_peak_6687 | 10.96455 |                                                                                                        |
| 12 | 9065643  | 9065921  | KD2-H4K8ac_peak_6688 | 5.57044  | PHC1_ENSG00000111752                                                                                   |
| 12 | 9103645  | 9103924  | KD2-H4K8ac_peak_6689 | 4.7849   |                                                                                                        |
| 12 | 9800176  | 9801277  | KD2-H4K8ac_peak_6690 | 7.76104  | RP11-705C15.4_ENSG00000256442                                                                          |
| 12 | 9892196  | 9892445  | KD2-H4K8ac_peak_6691 | 5.20908  |                                                                                                        |
| 12 | 10516888 | 10517451 | KD2-H4K8ac_peak_6692 | 6.16888  | RP11-277P12.20_ENSG00000245648                                                                         |
| 12 | 10766844 | 10767099 | KD2-H4K8ac_peak_6693 | 7.12754  | MAGOHB_ENSG00000111196                                                                                 |
| 12 | 11323768 | 11324156 | KD2-H4K8ac_peak_6694 | 24.3087  | PRR4_ENSG00000111215;TAS2R14_ENSG00000212127;RP11-785H5.2_ENSG00000256712;RP11-785H5.1_ENSG00000256537 |
| 12 | 11801566 | 11802628 | KD2-H4K8ac_peak_6695 | 14.66631 | ETV6_ENSG00000139083                                                                                   |
| 12 | 11802821 | 11803067 | KD2-H4K8ac_peak_6696 | 14.05403 | ETV6_ENSG00000139083                                                                                   |
| 12 | 11829269 | 11829611 | KD2-H4K8ac_peak_6697 | 5.25071  |                                                                                                        |
| 12 | 12161983 | 12162262 | KD2-H4K8ac_peak_6698 | 6.40683  |                                                                                                        |
| 12 | 12185938 | 12186161 | KD2-H4K8ac_peak_6699 | 6.25869  |                                                                                                        |
| 12 | 12235109 | 12235332 | KD2-H4K8ac_peak_6700 | 11.30637 |                                                                                                        |
| 12 | 12419710 | 12420510 | KD2-H4K8ac_peak_6701 | 25.35008 | LRP6_ENSG00000070018                                                                                   |
| 12 | 12502714 | 12503469 | KD2-H4K8ac_peak_6702 | 12.93209 | MANSC1_ENSG00000111261                                                                                 |
| 12 | 12510173 | 12510467 | KD2-H4K8ac_peak_6703 | 5.30799  | LOH12CR2_ENSG00000205791;LOH12CR1_ENSG00000165714                                                      |
| 12 | 12664173 | 12664727 | KD2-H4K8ac_peak_6704 | 4.42765  |                                                                                                        |
| 12 | 12686453 | 12686662 | KD2-H4K8ac_peak_6705 | 4.19473  |                                                                                                        |
| 12 | 12714574 | 12714987 | KD2-H4K8ac_peak_6706 | 16.57619 | DUSP16_ENSG00000111266                                                                                 |
| 12 | 12715709 | 12716038 | KD2-H4K8ac_peak_6707 | 5.13615  | DUSP16_ENSG00000111266                                                                                 |
| 12 | 12849348 | 12849540 | KD2-H4K8ac_peak_6708 | 7.45501  | GPR19_ENSG00000183150                                                                                  |
| 12 | 12869283 | 12870074 | KD2-H4K8ac_peak_6709 | 28.21903 |                                                                                                        |
| 12 | 12870330 | 12870726 | KD2-H4K8ac_peak_6710 | 18.31034 |                                                                                                        |
| 12 | 12876635 | 12878234 | KD2-H4K8ac_peak_6711 | 13.80019 | APOLD1_ENSG00000178878;RP11-180M15.4_ENSG00000256658                                                   |
| 12 | 12939567 | 12939813 | KD2-H4K8ac_peak_6712 | 5.57044  |                                                                                                        |
| 12 | 12940034 | 12940576 | KD2-H4K8ac_peak_6713 | 19.88671 |                                                                                                        |
| 12 | 12944620 | 12944824 | KD2-H4K8ac_peak_6714 | 6.72334  |                                                                                                        |

|    |          |          |                      |          |                                                     |
|----|----------|----------|----------------------|----------|-----------------------------------------------------|
| 12 | 13197106 | 13197728 | KD2-H4K8ac_peak_6715 | 8.82366  | KIAA1467_ENSG00000084444                            |
| 12 | 13253417 | 13254795 | KD2-H4K8ac_peak_6716 | 26.74774 |                                                     |
| 12 | 13408991 | 13409327 | KD2-H4K8ac_peak_6717 | 4.01115  |                                                     |
| 12 | 14393299 | 14393628 | KD2-H4K8ac_peak_6718 | 10.96455 |                                                     |
| 12 | 14411106 | 14411670 | KD2-H4K8ac_peak_6719 | 6.36375  |                                                     |
| 12 | 14538021 | 14538364 | KD2-H4K8ac_peak_6720 | 10.21502 |                                                     |
| 12 | 14720415 | 14720730 | KD2-H4K8ac_peak_6721 | 6.76298  | PLBD1_ENSG00000121316;RP11-695J4.2_ENSG00000256751  |
| 12 | 14956054 | 14956349 | KD2-H4K8ac_peak_6722 | 5.30799  | WBP11_ENSG00000084463;C12orf60_ENSG00000182993      |
| 12 | 15475573 | 15476033 | KD2-H4K8ac_peak_6723 | 9.11891  | PTPRO_ENSG00000151490                               |
| 12 | 15942077 | 15942279 | KD2-H4K8ac_peak_6724 | 5.75757  |                                                     |
| 12 | 15942633 | 15943168 | KD2-H4K8ac_peak_6725 | 12.23    |                                                     |
| 12 | 16034752 | 16035182 | KD2-H4K8ac_peak_6726 | 14.8083  | EPS8_ENSG00000151491;STRAP_ENSG00000023734          |
| 12 | 16035530 | 16035772 | KD2-H4K8ac_peak_6727 | 6.76298  | EPS8_ENSG00000151491;STRAP_ENSG00000023734          |
| 12 | 16064295 | 16064516 | KD2-H4K8ac_peak_6728 | 9.63487  | DERA_ENSG00000023697                                |
| 12 | 16757885 | 16758087 | KD2-H4K8ac_peak_6729 | 8.17902  |                                                     |
| 12 | 19282622 | 19283387 | KD2-H4K8ac_peak_6730 | 18.62998 | PLEKHA5_ENSG00000052126                             |
| 12 | 19563031 | 19563228 | KD2-H4K8ac_peak_6731 | 6.75638  |                                                     |
| 12 | 19563534 | 19563846 | KD2-H4K8ac_peak_6732 | 4.92515  |                                                     |
| 12 | 19592619 | 19593059 | KD2-H4K8ac_peak_6733 | 12.84642 |                                                     |
| 12 | 19726192 | 19727325 | KD2-H4K8ac_peak_6734 | 7.47462  |                                                     |
| 12 | 20057165 | 20057500 | KD2-H4K8ac_peak_6735 | 5.75452  |                                                     |
| 12 | 20097593 | 20097870 | KD2-H4K8ac_peak_6736 | 4.52514  |                                                     |
| 12 | 20125380 | 20125666 | KD2-H4K8ac_peak_6737 | 6.2781   | AC087237.1_ENSG00000221679                          |
| 12 | 20421942 | 20422245 | KD2-H4K8ac_peak_6738 | 6.40683  |                                                     |
| 12 | 20521471 | 20521881 | KD2-H4K8ac_peak_6739 | 7.27716  | PDE3A_ENSG00000172572                               |
| 12 | 20522214 | 20523154 | KD2-H4K8ac_peak_6740 | 22.62254 | RP11-284H19.1_ENSG00000256879;PDE3A_ENSG00000172572 |
| 12 | 20741622 | 20742115 | KD2-H4K8ac_peak_6741 | 6.40683  |                                                     |
| 12 | 20782784 | 20782984 | KD2-H4K8ac_peak_6742 | 3.75035  |                                                     |
| 12 | 21590531 | 21590745 | KD2-H4K8ac_peak_6743 | 6.25869  | PYROXD1_ENSG00000121350                             |
| 12 | 21590951 | 21591379 | KD2-H4K8ac_peak_6744 | 6.65673  | PYROXD1_ENSG00000121350                             |
| 12 | 21653868 | 21654291 | KD2-H4K8ac_peak_6745 | 7.12754  | RECQL_ENSG0000004700;GOLT1B_ENSG00000111711         |
| 12 | 21654787 | 21654986 | KD2-H4K8ac_peak_6746 | 9.34989  | RECQL_ENSG0000004700;GOLT1B_ENSG00000111711         |
| 12 | 21810349 | 21810711 | KD2-H4K8ac_peak_6747 | 7.07117  |                                                     |
| 12 | 22199194 | 22199587 | KD2-H4K8ac_peak_6748 | 34.26109 | CMAS_ENSG00000111726                                |
| 12 | 22697630 | 22697859 | KD2-H4K8ac_peak_6749 | 5.53033  | C2CD5_ENSG00000111731                               |
| 12 | 22777337 | 22777647 | KD2-H4K8ac_peak_6750 | 4.20044  | RP11-268P4.4_ENSG00000257023;ETNK1_ENSG00000139163  |
| 12 | 22778206 | 22778439 | KD2-H4K8ac_peak_6751 | 6.20982  | RP11-268P4.4_ENSG00000257023;ETNK1_ENSG00000139163  |
| 12 | 23250557 | 23250892 | KD2-H4K8ac_peak_6752 | 4.42765  |                                                     |
| 12 | 24714905 | 24716318 | KD2-H4K8ac_peak_6753 | 9.63487  | RP11-444D3.1_ENSG00000255864                        |
| 12 | 25101554 | 25102956 | KD2-H4K8ac_peak_6754 | 16.8435  | BCAT1_ENSG00000060982;RP11-662I13.2_ENSG00000255921 |
| 12 | 25403317 | 25403794 | KD2-H4K8ac_peak_6755 | 8.55271  | KRAS_ENSG00000133703                                |
| 12 | 25517288 | 25517511 | KD2-H4K8ac_peak_6756 | 9.11818  |                                                     |
| 12 | 25538733 | 25538985 | KD2-H4K8ac_peak_6757 | 6.40297  |                                                     |
| 12 | 25805459 | 25806281 | KD2-H4K8ac_peak_6758 | 8.23062  |                                                     |
| 12 | 25807395 | 25807804 | KD2-H4K8ac_peak_6759 | 5.88845  |                                                     |
| 12 | 25808617 | 25808931 | KD2-H4K8ac_peak_6760 | 3.75035  |                                                     |

|    |          |          |                      |          |                                                       |
|----|----------|----------|----------------------|----------|-------------------------------------------------------|
| 12 | 25927367 | 25927620 | KD2-H4K8ac_peak_6761 | 5.75452  |                                                       |
| 12 | 26110972 | 26112375 | KD2-H4K8ac_peak_6762 | 15.22643 | RASSF8-AS1_ENSG00000246695;RASSF8_ENSG00000123094     |
| 12 | 26139304 | 26139498 | KD2-H4K8ac_peak_6763 | 4.37708  |                                                       |
| 12 | 26170465 | 26170696 | KD2-H4K8ac_peak_6764 | 4.86824  |                                                       |
| 12 | 26266650 | 26267206 | KD2-H4K8ac_peak_6765 | 6.31143  |                                                       |
| 12 | 26348702 | 26349171 | KD2-H4K8ac_peak_6766 | 8.53092  |                                                       |
| 12 | 26379473 | 26379747 | KD2-H4K8ac_peak_6767 | 5.4779   |                                                       |
| 12 | 26986799 | 26987093 | KD2-H4K8ac_peak_6768 | 5.14125  | ITPR2_ENSG00000123104                                 |
| 12 | 27007072 | 27007310 | KD2-H4K8ac_peak_6769 | 6.40683  |                                                       |
| 12 | 27023082 | 27023276 | KD2-H4K8ac_peak_6770 | 6.66692  |                                                       |
| 12 | 27023582 | 27023793 | KD2-H4K8ac_peak_6771 | 4.52326  |                                                       |
| 12 | 27024269 | 27024468 | KD2-H4K8ac_peak_6772 | 6.40683  |                                                       |
| 12 | 27091447 | 27091798 | KD2-H4K8ac_peak_6773 | 10.21366 | ASUN_ENSG00000064102;FGFR1OP2_ENSG00000111790         |
| 12 | 27167544 | 27167889 | KD2-H4K8ac_peak_6774 | 8.00457  | TM7SF3_ENSG00000064115                                |
| 12 | 27396689 | 27397039 | KD2-H4K8ac_peak_6775 | 6.20982  | STK38L_ENSG00000211455                                |
| 12 | 27397266 | 27397650 | KD2-H4K8ac_peak_6776 | 10.05606 | STK38L_ENSG00000211455                                |
| 12 | 27485386 | 27485659 | KD2-H4K8ac_peak_6777 | 5.01002  | ARNTL2_ENSG00000029153                                |
| 12 | 27485860 | 27486318 | KD2-H4K8ac_peak_6778 | 8.83582  | ARNTL2_ENSG00000029153                                |
| 12 | 27676426 | 27676654 | KD2-H4K8ac_peak_6779 | 5.22731  | PPFIBP1_ENSG00000110841                               |
| 12 | 27863791 | 27864333 | KD2-H4K8ac_peak_6780 | 18.12133 | RP11-1060J15.4_ENSG00000256377;MRPS35_ENSG00000061794 |
| 12 | 27932361 | 27933636 | KD2-H4K8ac_peak_6781 | 11.04256 | KLHL42_ENSG00000087448;RP11-860B13.1_ENSG00000256747  |
| 12 | 27970900 | 27971296 | KD2-H4K8ac_peak_6782 | 5.14125  |                                                       |
| 12 | 28342965 | 28343629 | KD2-H4K8ac_peak_6783 | 15.66774 | RP11-967K21.1_ENSG00000247934                         |
| 12 | 29301489 | 29302684 | KD2-H4K8ac_peak_6784 | 19.91242 | RP11-946L16.1_ENSG00000257258;FAR2_ENSG00000064763    |
| 12 | 29533669 | 29534049 | KD2-H4K8ac_peak_6785 | 11.92978 | ERGIC2_ENSG00000087502                                |
| 12 | 29878844 | 29879196 | KD2-H4K8ac_peak_6786 | 8.1233   |                                                       |
| 12 | 29936522 | 29937281 | KD2-H4K8ac_peak_6787 | 8.86099  | TMTC1_ENSG00000133687                                 |
| 12 | 30848232 | 30848713 | KD2-H4K8ac_peak_6788 | 12.36441 | IPO8_ENSG00000133704                                  |
| 12 | 30849463 | 30849682 | KD2-H4K8ac_peak_6789 | 7.40314  | IPO8_ENSG00000133704                                  |
| 12 | 30907314 | 30907555 | KD2-H4K8ac_peak_6790 | 9.20193  | CAPRIN2_ENSG00000110888;RP11-77I22.2_ENSG00000246331  |
| 12 | 30908113 | 30908644 | KD2-H4K8ac_peak_6791 | 8.55271  | CAPRIN2_ENSG00000110888;RP11-77I22.2_ENSG00000246331  |
| 12 | 30949103 | 30950017 | KD2-H4K8ac_peak_6792 | 12.82393 |                                                       |
| 12 | 31078963 | 31080338 | KD2-H4K8ac_peak_6793 | 15.58442 | TSPAN11_ENSG00000110900                               |
| 12 | 31388032 | 31388650 | KD2-H4K8ac_peak_6794 | 5.77029  |                                                       |
| 12 | 31477232 | 31478659 | KD2-H4K8ac_peak_6795 | 7.07117  | AC024940.1_ENSG00000177340                            |
| 12 | 31742769 | 31743968 | KD2-H4K8ac_peak_6796 | 22.66567 | DENND5B_ENSG00000170456;DENND5B-AS1_ENSG00000255867   |
| 12 | 31873917 | 31874366 | KD2-H4K8ac_peak_6797 | 6.31143  |                                                       |
| 12 | 31875556 | 31875947 | KD2-H4K8ac_peak_6798 | 6.0073   |                                                       |
| 12 | 32112411 | 32112736 | KD2-H4K8ac_peak_6799 | 5.75452  | KIAA1551_ENSG00000174718                              |
| 12 | 32146937 | 32147343 | KD2-H4K8ac_peak_6800 | 5.19569  |                                                       |
| 12 | 32246651 | 32246892 | KD2-H4K8ac_peak_6801 | 4.01115  |                                                       |
| 12 | 32259161 | 32260502 | KD2-H4K8ac_peak_6802 | 22.36554 | RP11-843B15.2_ENSG00000257530;BICD1_ENSG00000151746   |
| 12 | 32334049 | 32334350 | KD2-H4K8ac_peak_6803 | 6.9809   |                                                       |
| 12 | 32543786 | 32544188 | KD2-H4K8ac_peak_6804 | 10.05606 |                                                       |
| 12 | 32653749 | 32654179 | KD2-H4K8ac_peak_6805 | 5.57044  |                                                       |
| 12 | 32831417 | 32831965 | KD2-H4K8ac_peak_6806 | 9.43685  | DNM1L_ENSG00000087470                                 |



|    |          |          |                      |          |                                                      |
|----|----------|----------|----------------------|----------|------------------------------------------------------|
| 12 | 32908281 | 32908796 | KD2-H4K8ac_peak_6807 | 19.33018 | YARS2_ENSG00000139131                                |
| 12 | 33030966 | 33031370 | KD2-H4K8ac_peak_6808 | 6.30229  |                                                      |
| 12 | 33049507 | 33049710 | KD2-H4K8ac_peak_6809 | 7.47462  | PKP2_ENSG00000057294                                 |
| 12 | 33049949 | 33050259 | KD2-H4K8ac_peak_6810 | 16.32216 | PKP2_ENSG00000057294                                 |
| 12 | 34175448 | 34175938 | KD2-H4K8ac_peak_6811 | 4.77079  | ALG10_ENSG00000139133                                |
| 12 | 34496245 | 34496878 | KD2-H4K8ac_peak_6812 | 12.17278 |                                                      |
| 12 | 34498179 | 34498837 | KD2-H4K8ac_peak_6813 | 5.30799  |                                                      |
| 12 | 34499142 | 34499660 | KD2-H4K8ac_peak_6814 | 5.57044  |                                                      |
| 12 | 38710674 | 38711010 | KD2-H4K8ac_peak_6815 | 11.1952  | ALG10B_ENSG00000175548                               |
| 12 | 39300159 | 39300549 | KD2-H4K8ac_peak_6816 | 12.80176 | CPNE8_ENSG00000139117;RP11-396F22.1_ENSG00000257718  |
| 12 | 39300746 | 39300953 | KD2-H4K8ac_peak_6817 | 5.14125  | CPNE8_ENSG00000139117;RP11-396F22.1_ENSG00000257718  |
| 12 | 39436384 | 39436616 | KD2-H4K8ac_peak_6818 | 7.12754  |                                                      |
| 12 | 39441914 | 39442141 | KD2-H4K8ac_peak_6819 | 6.00243  |                                                      |
| 12 | 39783695 | 39784074 | KD2-H4K8ac_peak_6820 | 9.07071  |                                                      |
| 12 | 39785545 | 39785878 | KD2-H4K8ac_peak_6821 | 4.9025   |                                                      |
| 12 | 39786110 | 39786562 | KD2-H4K8ac_peak_6822 | 5.88845  |                                                      |
| 12 | 39786844 | 39787091 | KD2-H4K8ac_peak_6823 | 6.64891  |                                                      |
| 12 | 39789304 | 39789609 | KD2-H4K8ac_peak_6824 | 8.79557  |                                                      |
| 12 | 39836020 | 39836736 | KD2-H4K8ac_peak_6825 | 7.36799  | KIF21A_ENSG00000139116;AC121334.1_ENSG00000252974    |
| 12 | 39837212 | 39837623 | KD2-H4K8ac_peak_6826 | 12.82393 | KIF21A_ENSG00000139116;AC121334.1_ENSG00000252974    |
| 12 | 40618188 | 40619147 | KD2-H4K8ac_peak_6827 | 14.48922 | AC079630.4_ENSG00000225342                           |
| 12 | 42326019 | 42326300 | KD2-H4K8ac_peak_6828 | 6.65673  | RP11-630C16.2_ENSG00000257239                        |
| 12 | 42326626 | 42326928 | KD2-H4K8ac_peak_6829 | 9.15329  | RP11-630C16.2_ENSG00000257239                        |
| 12 | 42538068 | 42538453 | KD2-H4K8ac_peak_6830 | 9.1707   | GXYLT1_ENSG00000151233                               |
| 12 | 42631709 | 42632008 | KD2-H4K8ac_peak_6831 | 10.72656 | PPHLN1_ENSG00000134283;YAF2_ENSG00000015153          |
| 12 | 42632291 | 42632560 | KD2-H4K8ac_peak_6832 | 10.87093 | PPHLN1_ENSG00000134283;YAF2_ENSG00000015153          |
| 12 | 42876914 | 42877502 | KD2-H4K8ac_peak_6833 | 8.30974  |                                                      |
| 12 | 43876194 | 43876552 | KD2-H4K8ac_peak_6834 | 6.16888  |                                                      |
| 12 | 44152058 | 44152337 | KD2-H4K8ac_peak_6835 | 8.30974  | PUS7L_ENSG00000129317;IRAK4_ENSG00000198001          |
| 12 | 44152949 | 44153154 | KD2-H4K8ac_peak_6836 | 5.29555  | PUS7L_ENSG00000129317;IRAK4_ENSG00000198001          |
| 12 | 44199729 | 44200062 | KD2-H4K8ac_peak_6837 | 15.81711 | TWF1_ENSG00000151239                                 |
| 12 | 44200345 | 44200640 | KD2-H4K8ac_peak_6838 | 6.00226  | TWF1_ENSG00000151239                                 |
| 12 | 45269853 | 45270054 | KD2-H4K8ac_peak_6839 | 7.12754  |                                                      |
| 12 | 45609496 | 45609715 | KD2-H4K8ac_peak_6840 | 7.40314  | PLEKHA8P1_ENSG00000134297;ANO6_ENSG00000177119       |
| 12 | 45610160 | 45610897 | KD2-H4K8ac_peak_6841 | 17.16047 | PLEKHA8P1_ENSG00000134297;ANO6_ENSG00000177119       |
| 12 | 46120788 | 46120987 | KD2-H4K8ac_peak_6842 | 6.90231  | LINC00938_ENSG00000273015                            |
| 12 | 46123085 | 46123371 | KD2-H4K8ac_peak_6843 | 21.52958 | ARID2_ENSG00000189079                                |
| 12 | 46123625 | 46124506 | KD2-H4K8ac_peak_6844 | 11.15509 | ARID2_ENSG00000189079                                |
| 12 | 46383916 | 46384321 | KD2-H4K8ac_peak_6845 | 10.43145 |                                                      |
| 12 | 46384805 | 46385007 | KD2-H4K8ac_peak_6846 | 6.65673  | SCAF11_ENSG00000139218                               |
| 12 | 46385525 | 46385766 | KD2-H4K8ac_peak_6847 | 8.59579  | SCAF11_ENSG00000139218                               |
| 12 | 46661064 | 46663863 | KD2-H4K8ac_peak_6848 | 12.30509 | SLC38A1_ENSG00000111371                              |
| 12 | 46765508 | 46766231 | KD2-H4K8ac_peak_6849 | 8.30974  | SLC38A2_ENSG00000134294;RP11-474P2.2_ENSG00000258096 |
| 12 | 46776286 | 46777072 | KD2-H4K8ac_peak_6850 | 12.82393 | RP11-96H19.1_ENSG00000257261                         |
| 12 | 46777504 | 46777844 | KD2-H4K8ac_peak_6851 | 10.21366 | RP11-96H19.1_ENSG00000257261                         |
| 12 | 48099463 | 48099695 | KD2-H4K8ac_peak_6852 | 5.14125  | RPAP3_ENSG00000005175;RP1-197B17.3_ENSG00000257433   |

|    |          |          |                      |          |                                                      |
|----|----------|----------|----------------------|----------|------------------------------------------------------|
| 12 | 48131218 | 48131661 | KD2-H4K8ac_peak_6853 | 3.75035  |                                                      |
| 12 | 48134782 | 48135302 | KD2-H4K8ac_peak_6854 | 12.93253 |                                                      |
| 12 | 48146845 | 48147130 | KD2-H4K8ac_peak_6855 | 6.66692  | SLC48A1_ENSG00000211584                              |
| 12 | 48153000 | 48153474 | KD2-H4K8ac_peak_6856 | 8.10216  |                                                      |
| 12 | 48167140 | 48167342 | KD2-H4K8ac_peak_6857 | 5.14125  |                                                      |
| 12 | 48196101 | 48196320 | KD2-H4K8ac_peak_6858 | 5.6755   |                                                      |
| 12 | 48201698 | 48202430 | KD2-H4K8ac_peak_6859 | 5.54647  |                                                      |
| 12 | 48212897 | 48213530 | KD2-H4K8ac_peak_6860 | 13.95627 |                                                      |
| 12 | 48213831 | 48214355 | KD2-H4K8ac_peak_6861 | 8.16906  |                                                      |
| 12 | 48222866 | 48223194 | KD2-H4K8ac_peak_6862 | 5.88845  |                                                      |
| 12 | 48384507 | 48386138 | KD2-H4K8ac_peak_6863 | 10.96455 |                                                      |
| 12 | 48386332 | 48386553 | KD2-H4K8ac_peak_6864 | 6.45018  |                                                      |
| 12 | 48499352 | 48500509 | KD2-H4K8ac_peak_6865 | 13.81781 | SENPI_ENSG00000079387;PFKM_ENSG00000152556           |
| 12 | 48576670 | 48576884 | KD2-H4K8ac_peak_6866 | 4.54006  | C12orf68_ENSG00000177875                             |
| 12 | 48577418 | 48577668 | KD2-H4K8ac_peak_6867 | 5.54647  | C12orf68_ENSG00000177875                             |
| 12 | 48592316 | 48592846 | KD2-H4K8ac_peak_6868 | 4.33139  | DKFZP779L1853_ENSG00000269514                        |
| 12 | 48690515 | 48690834 | KD2-H4K8ac_peak_6869 | 5.30799  |                                                      |
| 12 | 48744128 | 48745251 | KD2-H4K8ac_peak_6870 | 15.039   | ZNF641_ENSG00000167528;RP11-370H10.6_ENSG00000257735 |
| 12 | 49111005 | 49111306 | KD2-H4K8ac_peak_6871 | 13.09607 | CCNT1_ENSG00000129315                                |
| 12 | 49182542 | 49184174 | KD2-H4K8ac_peak_6872 | 21.75906 | ADCY6_ENSG00000174233;RP11-579D7.4_ENSG00000257660   |
| 12 | 49208662 | 49209659 | KD2-H4K8ac_peak_6873 | 15.61791 |                                                      |
| 12 | 49211502 | 49213096 | KD2-H4K8ac_peak_6874 | 14.27217 |                                                      |
| 12 | 49245522 | 49245922 | KD2-H4K8ac_peak_6875 | 10.43145 | DDX23_ENSG00000174243                                |
| 12 | 49259284 | 49259528 | KD2-H4K8ac_peak_6876 | 7.40314  | RND1_ENSG00000172602                                 |
| 12 | 49276531 | 49277898 | KD2-H4K8ac_peak_6877 | 7.47462  |                                                      |
| 12 | 49350993 | 49351227 | KD2-H4K8ac_peak_6878 | 18.31034 | RP11-302B13.5_ENSG00000272822;ARF3_ENSG00000134287   |
| 12 | 49391771 | 49392499 | KD2-H4K8ac_peak_6879 | 8.83582  | DDN_ENSG00000181418;RP11-386G11.5_ENSG00000257913    |
| 12 | 49411730 | 49412510 | KD2-H4K8ac_peak_6880 | 15.52826 | PRKAG1_ENSG00000181929                               |
| 12 | 49413283 | 49413517 | KD2-H4K8ac_peak_6881 | 8.30974  | PRKAG1_ENSG00000181929                               |
| 12 | 49453464 | 49455234 | KD2-H4K8ac_peak_6882 | 14.39182 | KMT2D_ENSG00000167548                                |
| 12 | 49481957 | 49482473 | KD2-H4K8ac_peak_6883 | 10.86378 |                                                      |
| 12 | 49505281 | 49505569 | KD2-H4K8ac_peak_6884 | 4.65111  | LMBR1L_ENSG00000139636                               |
| 12 | 49524236 | 49524543 | KD2-H4K8ac_peak_6885 | 8.86099  | TUBA1B_ENSG00000123416                               |
| 12 | 49524762 | 49525151 | KD2-H4K8ac_peak_6886 | 16.71655 | TUBA1B_ENSG00000123416                               |
| 12 | 49582343 | 49582643 | KD2-H4K8ac_peak_6887 | 9.34989  | TUBA1A_ENSG00000167552;TUBA1C_ENSG00000167553        |
| 12 | 49608378 | 49608659 | KD2-H4K8ac_peak_6888 | 8.16133  |                                                      |
| 12 | 49617168 | 49617372 | KD2-H4K8ac_peak_6889 | 4.59928  |                                                      |
| 12 | 49617713 | 49618015 | KD2-H4K8ac_peak_6890 | 9.72244  |                                                      |
| 12 | 49626437 | 49627090 | KD2-H4K8ac_peak_6891 | 7.40111  |                                                      |
| 12 | 49627995 | 49628769 | KD2-H4K8ac_peak_6892 | 7.67504  |                                                      |
| 12 | 49686222 | 49687684 | KD2-H4K8ac_peak_6893 | 16.87121 | PRPH_ENSG00000135406                                 |
| 12 | 49688130 | 49688531 | KD2-H4K8ac_peak_6894 | 6.0073   |                                                      |
| 12 | 49715566 | 49716030 | KD2-H4K8ac_peak_6895 | 7.94441  | TROAP_ENSG00000135451                                |
| 12 | 49716259 | 49716736 | KD2-H4K8ac_peak_6896 | 8.59579  | TROAP_ENSG00000135451                                |
| 12 | 49717102 | 49717447 | KD2-H4K8ac_peak_6897 | 8.28234  | RP11-161H23.9_ENSG00000258334;TROAP_ENSG00000135451  |
| 12 | 49730251 | 49730907 | KD2-H4K8ac_peak_6898 | 7.36799  | C1QL4_ENSG00000186897                                |

|    |          |          |                      |          |                                                   |
|----|----------|----------|----------------------|----------|---------------------------------------------------|
| 12 | 49741617 | 49742244 | KD2-H4K8ac_peak_6899 | 16.15695 | DNAJC22_ENSG00000178401                           |
| 12 | 49759812 | 49760141 | KD2-H4K8ac_peak_6900 | 10.29736 | SPATS2_ENSG00000123352                            |
| 12 | 49761600 | 49761813 | KD2-H4K8ac_peak_6901 | 4.47369  |                                                   |
| 12 | 49932557 | 49932858 | KD2-H4K8ac_peak_6902 | 4.52514  | KCNH3_ENSG00000135519                             |
| 12 | 49961202 | 49962283 | KD2-H4K8ac_peak_6903 | 10.30284 | MCRS1_ENSG00000187778;PRPF40B_ENSG00000110844     |
| 12 | 50066874 | 50067455 | KD2-H4K8ac_peak_6904 | 5.30799  |                                                   |
| 12 | 50067826 | 50068218 | KD2-H4K8ac_peak_6905 | 5.07901  |                                                   |
| 12 | 50100271 | 50100579 | KD2-H4K8ac_peak_6906 | 5.08628  | TMBIM6_ENSG00000139644                            |
| 12 | 50100831 | 50101210 | KD2-H4K8ac_peak_6907 | 10.53377 | FMNL3_ENSG00000161791;TMBIM6_ENSG00000139644      |
| 12 | 50134437 | 50134678 | KD2-H4K8ac_peak_6908 | 4.35346  |                                                   |
| 12 | 50135614 | 50135845 | KD2-H4K8ac_peak_6909 | 8.82366  |                                                   |
| 12 | 50170340 | 50170792 | KD2-H4K8ac_peak_6910 | 9.15329  |                                                   |
| 12 | 50236298 | 50236817 | KD2-H4K8ac_peak_6911 | 11.24702 | BCDIN3D_ENSG00000186666                           |
| 12 | 50237113 | 50237432 | KD2-H4K8ac_peak_6912 | 5.88845  | BCDIN3D_ENSG00000186666                           |
| 12 | 50261640 | 50262527 | KD2-H4K8ac_peak_6913 | 10.7186  |                                                   |
| 12 | 50263419 | 50264045 | KD2-H4K8ac_peak_6914 | 9.36665  |                                                   |
| 12 | 50276420 | 50276624 | KD2-H4K8ac_peak_6915 | 4.98072  |                                                   |
| 12 | 50298153 | 50298360 | KD2-H4K8ac_peak_6916 | 5.32397  | FAIM2_ENSG00000135472                             |
| 12 | 50339236 | 50339452 | KD2-H4K8ac_peak_6917 | 9.11031  |                                                   |
| 12 | 50361005 | 50361348 | KD2-H4K8ac_peak_6918 | 14.39182 | AQP6_ENSG00000086159                              |
| 12 | 50361595 | 50361889 | KD2-H4K8ac_peak_6919 | 7.40314  | AQP6_ENSG00000086159                              |
| 12 | 50369072 | 50369311 | KD2-H4K8ac_peak_6920 | 4.35724  |                                                   |
| 12 | 50374029 | 50374231 | KD2-H4K8ac_peak_6921 | 5.59859  |                                                   |
| 12 | 50377293 | 50377589 | KD2-H4K8ac_peak_6922 | 6.04107  |                                                   |
| 12 | 50380443 | 50380690 | KD2-H4K8ac_peak_6923 | 5.95537  |                                                   |
| 12 | 50418975 | 50419234 | KD2-H4K8ac_peak_6924 | 8.25022  |                                                   |
| 12 | 50419631 | 50420180 | KD2-H4K8ac_peak_6925 | 4.42765  |                                                   |
| 12 | 50435276 | 50435491 | KD2-H4K8ac_peak_6926 | 3.75035  |                                                   |
| 12 | 50444970 | 50445299 | KD2-H4K8ac_peak_6927 | 4.211    |                                                   |
| 12 | 50451149 | 50451346 | KD2-H4K8ac_peak_6928 | 9.18237  | ASIC1_ENSG00000110881                             |
| 12 | 50451993 | 50452210 | KD2-H4K8ac_peak_6929 | 4.64388  | ASIC1_ENSG00000110881                             |
| 12 | 50479118 | 50479382 | KD2-H4K8ac_peak_6930 | 20.96279 | SMARCD1_ENSG00000066117                           |
| 12 | 50503966 | 50504366 | KD2-H4K8ac_peak_6931 | 5.57044  |                                                   |
| 12 | 50504578 | 50505454 | KD2-H4K8ac_peak_6932 | 12.93253 | COX14_ENSG00000178449;RP4-605O3.4_ENSG00000272368 |
| 12 | 50560678 | 50560929 | KD2-H4K8ac_peak_6933 | 7.07117  | CERS5_ENSG00000139624                             |
| 12 | 50676962 | 50677962 | KD2-H4K8ac_peak_6934 | 9.51625  | LIMA1_ENSG00000050405;AC008147.2_ENSG00000203433  |
| 12 | 50793265 | 50793848 | KD2-H4K8ac_peak_6935 | 7.47462  |                                                   |
| 12 | 50794821 | 50795239 | KD2-H4K8ac_peak_6936 | 7.76329  |                                                   |
| 12 | 50898837 | 50899085 | KD2-H4K8ac_peak_6937 | 6.2781   | DIP2B_ENSG00000066084                             |
| 12 | 51157917 | 51158720 | KD2-H4K8ac_peak_6938 | 21.26856 | ATF1_ENSG00000123268                              |
| 12 | 51419627 | 51420107 | KD2-H4K8ac_peak_6939 | 7.28628  |                                                   |
| 12 | 51420432 | 51420932 | KD2-H4K8ac_peak_6940 | 7.69287  |                                                   |
| 12 | 51441688 | 51441900 | KD2-H4K8ac_peak_6941 | 9.31907  | LETMD1_ENSG00000050426                            |
| 12 | 51442132 | 51442578 | KD2-H4K8ac_peak_6942 | 7.70289  | LETMD1_ENSG00000050426                            |
| 12 | 51566631 | 51566895 | KD2-H4K8ac_peak_6943 | 19.54082 | TFCP2_ENSG00000135457                             |
| 12 | 51567128 | 51567557 | KD2-H4K8ac_peak_6944 | 8.85813  | TFCP2_ENSG00000135457                             |

|    |          |          |                      |          |                                               |
|----|----------|----------|----------------------|----------|-----------------------------------------------|
| 12 | 51611964 | 51612800 | KD2-H4K8ac_peak_6945 | 14.57259 | POU6F1_ENSG00000184271                        |
| 12 | 51632008 | 51632246 | KD2-H4K8ac_peak_6946 | 7.32463  | DAZAP2_ENSG00000183283                        |
| 12 | 51632646 | 51632948 | KD2-H4K8ac_peak_6947 | 14.99434 | DAZAP2_ENSG00000183283                        |
| 12 | 51663821 | 51664156 | KD2-H4K8ac_peak_6948 | 5.54647  | SMAGP_ENSG00000170545                         |
| 12 | 51664371 | 51664656 | KD2-H4K8ac_peak_6949 | 7.1181   | SMAGP_ENSG00000170545                         |
| 12 | 51765155 | 51766104 | KD2-H4K8ac_peak_6950 | 8.30974  |                                               |
| 12 | 51781460 | 51781926 | KD2-H4K8ac_peak_6951 | 5.14125  |                                               |
| 12 | 51784887 | 51785844 | KD2-H4K8ac_peak_6952 | 12.08081 | GALNT6_ENSG00000139629;SLC4A8_ENSG00000050438 |
| 12 | 51800435 | 51800629 | KD2-H4K8ac_peak_6953 | 5.14125  |                                               |
| 12 | 51801382 | 51801600 | KD2-H4K8ac_peak_6954 | 10.63725 |                                               |
| 12 | 51818176 | 51818404 | KD2-H4K8ac_peak_6955 | 7.47462  | RP11-607P23.1_ENSG00000271065                 |
| 12 | 51818690 | 51819053 | KD2-H4K8ac_peak_6956 | 18.94636 | RP11-607P23.1_ENSG00000271065                 |
| 12 | 51941062 | 51941254 | KD2-H4K8ac_peak_6957 | 5.22731  |                                               |
| 12 | 51984186 | 51984742 | KD2-H4K8ac_peak_6958 | 5.88845  | SCN8A_ENSG00000196876                         |
| 12 | 52207737 | 52208897 | KD2-H4K8ac_peak_6959 | 14.66631 |                                               |
| 12 | 52214877 | 52215427 | KD2-H4K8ac_peak_6960 | 15.69572 | RP11-923I11.7_ENSG00000261308                 |
| 12 | 52239141 | 52239449 | KD2-H4K8ac_peak_6961 | 5.14125  |                                               |
| 12 | 52240918 | 52241135 | KD2-H4K8ac_peak_6962 | 5.88845  | RP11-923I11.5_ENSG00000259887                 |
| 12 | 52242027 | 52242450 | KD2-H4K8ac_peak_6963 | 11.80283 | RP11-923I11.5_ENSG00000259887                 |
| 12 | 52243037 | 52243289 | KD2-H4K8ac_peak_6964 | 8.09303  |                                               |
| 12 | 52262524 | 52263445 | KD2-H4K8ac_peak_6965 | 13.70753 |                                               |
| 12 | 52304580 | 52304781 | KD2-H4K8ac_peak_6966 | 4.67342  |                                               |
| 12 | 52306028 | 52307872 | KD2-H4K8ac_peak_6967 | 6.20982  |                                               |
| 12 | 52309002 | 52309275 | KD2-H4K8ac_peak_6968 | 7.76569  |                                               |
| 12 | 52311411 | 52311979 | KD2-H4K8ac_peak_6969 | 12.57143 |                                               |
| 12 | 52312860 | 52313072 | KD2-H4K8ac_peak_6970 | 6.40297  |                                               |
| 12 | 52314926 | 52315128 | KD2-H4K8ac_peak_6971 | 6.27719  |                                               |
| 12 | 52332479 | 52332909 | KD2-H4K8ac_peak_6972 | 9.11031  |                                               |
| 12 | 52334168 | 52334648 | KD2-H4K8ac_peak_6973 | 6.25869  |                                               |
| 12 | 52345466 | 52345981 | KD2-H4K8ac_peak_6974 | 13.73635 | ACVR1B_ENSG00000135503                        |
| 12 | 52387159 | 52387384 | KD2-H4K8ac_peak_6975 | 4.77079  |                                               |
| 12 | 52400821 | 52401072 | KD2-H4K8ac_peak_6976 | 5.82799  | GRASP_ENSG00000161835                         |
| 12 | 52403912 | 52404580 | KD2-H4K8ac_peak_6977 | 11.05407 |                                               |
| 12 | 52414426 | 52414619 | KD2-H4K8ac_peak_6978 | 5.88845  |                                               |
| 12 | 52416529 | 52417242 | KD2-H4K8ac_peak_6979 | 6.8836   | NR4A1_ENSG00000123358                         |
| 12 | 52419115 | 52419501 | KD2-H4K8ac_peak_6980 | 8.4814   |                                               |
| 12 | 52419733 | 52419977 | KD2-H4K8ac_peak_6981 | 7.65815  |                                               |
| 12 | 52430489 | 52430808 | KD2-H4K8ac_peak_6982 | 4.67342  |                                               |
| 12 | 52431124 | 52431486 | KD2-H4K8ac_peak_6983 | 9.63487  |                                               |
| 12 | 52444282 | 52444952 | KD2-H4K8ac_peak_6984 | 9.96941  |                                               |
| 12 | 52462902 | 52463299 | KD2-H4K8ac_peak_6985 | 9.31907  | C12orf44_ENSG00000123395                      |
| 12 | 52463898 | 52464118 | KD2-H4K8ac_peak_6986 | 10.0692  | C12orf44_ENSG00000123395                      |
| 12 | 52545918 | 52546129 | KD2-H4K8ac_peak_6987 | 4.37709  |                                               |
| 12 | 52568279 | 52568474 | KD2-H4K8ac_peak_6988 | 6.30626  |                                               |
| 12 | 52568753 | 52569153 | KD2-H4K8ac_peak_6989 | 5.29555  |                                               |
| 12 | 52569347 | 52569842 | KD2-H4K8ac_peak_6990 | 8.95692  |                                               |

|    |          |          |                      |          |                                                        |
|----|----------|----------|----------------------|----------|--------------------------------------------------------|
| 12 | 52576198 | 52576445 | KD2-H4K8ac_peak_6991 | 7.67504  |                                                        |
| 12 | 52577105 | 52577458 | KD2-H4K8ac_peak_6992 | 4.21775  |                                                        |
| 12 | 52577723 | 52578275 | KD2-H4K8ac_peak_6993 | 11.03352 |                                                        |
| 12 | 52579953 | 52580467 | KD2-H4K8ac_peak_6994 | 6.65673  |                                                        |
| 12 | 52592506 | 52593697 | KD2-H4K8ac_peak_6995 | 13.44374 |                                                        |
| 12 | 52593915 | 52594153 | KD2-H4K8ac_peak_6996 | 7.69287  |                                                        |
| 12 | 52594487 | 52594690 | KD2-H4K8ac_peak_6997 | 5.02474  |                                                        |
| 12 | 52596041 | 52596445 | KD2-H4K8ac_peak_6998 | 6.65673  |                                                        |
| 12 | 52596670 | 52597005 | KD2-H4K8ac_peak_6999 | 8.55581  |                                                        |
| 12 | 52597246 | 52597639 | KD2-H4K8ac_peak_7000 | 5.14125  |                                                        |
| 12 | 52600852 | 52601249 | KD2-H4K8ac_peak_7001 | 6.66692  |                                                        |
| 12 | 52637950 | 52638384 | KD2-H4K8ac_peak_7002 | 9.1994   |                                                        |
| 12 | 53399259 | 53399849 | KD2-H4K8ac_peak_7003 | 11.43863 | EIF4B_ENSG00000063046                                  |
| 12 | 53400336 | 53400692 | KD2-H4K8ac_peak_7004 | 11.60333 | EIF4B_ENSG00000063046                                  |
| 12 | 53440547 | 53440885 | KD2-H4K8ac_peak_7005 | 13.73635 | TENC1_ENSG00000111077                                  |
| 12 | 53441270 | 53441837 | KD2-H4K8ac_peak_7006 | 13.81781 | TENC1_ENSG00000111077                                  |
| 12 | 53443032 | 53443499 | KD2-H4K8ac_peak_7007 | 8.79106  |                                                        |
| 12 | 53443790 | 53444229 | KD2-H4K8ac_peak_7008 | 3.97079  |                                                        |
| 12 | 53447778 | 53448194 | KD2-H4K8ac_peak_7009 | 5.54647  | RP11-983P16.4_ENSG00000257337                          |
| 12 | 53472659 | 53472990 | KD2-H4K8ac_peak_7010 | 14.48084 | SPRYD3_ENSG00000167778                                 |
| 12 | 53473350 | 53474484 | KD2-H4K8ac_peak_7011 | 10.19949 | SPRYD3_ENSG00000167778                                 |
| 12 | 53490888 | 53492132 | KD2-H4K8ac_peak_7012 | 11.03331 | IGFBP6_ENSG00000167779                                 |
| 12 | 53492428 | 53492670 | KD2-H4K8ac_peak_7013 | 5.557    |                                                        |
| 12 | 53573618 | 53574188 | KD2-H4K8ac_peak_7014 | 14.05403 | ZNF740_ENSG00000139651;CSAD_ENSG00000139631            |
| 12 | 53614483 | 53614735 | KD2-H4K8ac_peak_7015 | 4.06758  |                                                        |
| 12 | 53615086 | 53615967 | KD2-H4K8ac_peak_7016 | 10.7186  |                                                        |
| 12 | 53616369 | 53617148 | KD2-H4K8ac_peak_7017 | 10.96455 |                                                        |
| 12 | 53625135 | 53625996 | KD2-H4K8ac_peak_7018 | 15.25274 | RARG_ENSG00000172819                                   |
| 12 | 53626263 | 53626768 | KD2-H4K8ac_peak_7019 | 6.2781   | RARG_ENSG00000172819                                   |
| 12 | 53627029 | 53628083 | KD2-H4K8ac_peak_7020 | 12.84642 | RARG_ENSG00000172819                                   |
| 12 | 53645146 | 53645675 | KD2-H4K8ac_peak_7021 | 7.36799  | MFSD5_ENSG00000182544                                  |
| 12 | 53645925 | 53646480 | KD2-H4K8ac_peak_7022 | 10.43145 | MFSD5_ENSG00000182544                                  |
| 12 | 53661567 | 53661892 | KD2-H4K8ac_peak_7023 | 5.08628  | ESPL1_ENSG00000135476                                  |
| 12 | 53693059 | 53693905 | KD2-H4K8ac_peak_7024 | 8.26945  | RP11-680A11.5_ENSG00000257605;C12orf10_ENSG00000139637 |
| 12 | 53715634 | 53715964 | KD2-H4K8ac_peak_7025 | 6.30229  |                                                        |
| 12 | 53717974 | 53718248 | KD2-H4K8ac_peak_7026 | 6.83936  | AAAS_ENSG00000094914                                   |
| 12 | 53718517 | 53720119 | KD2-H4K8ac_peak_7027 | 12.93209 | AAAS_ENSG00000094914                                   |
| 12 | 53732525 | 53732851 | KD2-H4K8ac_peak_7028 | 8.02571  |                                                        |
| 12 | 53738447 | 53738913 | KD2-H4K8ac_peak_7029 | 7.28827  | SP7_ENSG00000170374                                    |
| 12 | 53739550 | 53739959 | KD2-H4K8ac_peak_7030 | 7.70289  | SP7_ENSG00000170374                                    |
| 12 | 53772996 | 53773210 | KD2-H4K8ac_peak_7031 | 8.10216  | SP1_ENSG00000185591                                    |
| 12 | 53774084 | 53774335 | KD2-H4K8ac_peak_7032 | 8.33649  | SP1_ENSG00000185591                                    |
| 12 | 53784156 | 53784446 | KD2-H4K8ac_peak_7033 | 14.00658 |                                                        |
| 12 | 53785224 | 53785450 | KD2-H4K8ac_peak_7034 | 9.02573  |                                                        |
| 12 | 53808527 | 53808755 | KD2-H4K8ac_peak_7035 | 6.94255  |                                                        |
| 12 | 53809154 | 53809751 | KD2-H4K8ac_peak_7036 | 8.17902  |                                                        |

|    |          |          |                      |          |                                                                                |
|----|----------|----------|----------------------|----------|--------------------------------------------------------------------------------|
| 12 | 53810602 | 53810814 | KD2-H4K8ac_peak_7037 | 5.75452  |                                                                                |
| 12 | 53811819 | 53812164 | KD2-H4K8ac_peak_7038 | 7.70289  |                                                                                |
| 12 | 53834195 | 53834610 | KD2-H4K8ac_peak_7039 | 6.24747  | PRR13_ENSG00000205352;RP11-793H13.8_ENSG00000257379;PCBP2_ENSG00000197111      |
| 12 | 53846146 | 53846410 | KD2-H4K8ac_peak_7040 | 12.82393 |                                                                                |
| 12 | 53892842 | 53893074 | KD2-H4K8ac_peak_7041 | 11.96169 | MAP3K12_ENSG00000139625                                                        |
| 12 | 53894809 | 53895992 | KD2-H4K8ac_peak_7042 | 15.61791 | MAP3K12_ENSG00000139625;RP11-793H13.11_ENSG00000270175;TARBP2_ENSG00000139546  |
| 12 | 54069152 | 54069826 | KD2-H4K8ac_peak_7043 | 8.30974  |                                                                                |
| 12 | 54070154 | 54070807 | KD2-H4K8ac_peak_7044 | 19.38373 | ATP5G2_ENSG00000135390                                                         |
| 12 | 54121592 | 54121951 | KD2-H4K8ac_peak_7045 | 6.66692  | CALCOCO1_ENSG00000012822                                                       |
| 12 | 54379104 | 54379316 | KD2-H4K8ac_peak_7046 | 5.51783  | RP11-834C11.12_ENSG00000273049;HOXC-AS3_ENSG00000251151;HOXC10_ENSG00000180818 |
| 12 | 54393488 | 54393702 | KD2-H4K8ac_peak_7047 | 6.25869  | HOXC-AS1_ENSG00000250451                                                       |
| 12 | 54394056 | 54394600 | KD2-H4K8ac_peak_7048 | 11.8457  | HOXC-AS1_ENSG00000250451                                                       |
| 12 | 54399989 | 54400198 | KD2-H4K8ac_peak_7049 | 9.23578  |                                                                                |
| 12 | 54409405 | 54409781 | KD2-H4K8ac_peak_7050 | 3.75035  | HOXC4_ENSG00000198353                                                          |
| 12 | 54411384 | 54411677 | KD2-H4K8ac_peak_7051 | 8.86391  | HOXC4_ENSG00000198353;RP11-834C11.14_ENSG00000273046                           |
| 12 | 54412009 | 54412732 | KD2-H4K8ac_peak_7052 | 14.99434 | AC012531.25_ENSG00000260597                                                    |
| 12 | 54413020 | 54413508 | KD2-H4K8ac_peak_7053 | 16.69872 | AC012531.25_ENSG00000260597                                                    |
| 12 | 54414918 | 54415328 | KD2-H4K8ac_peak_7054 | 6.0073   |                                                                                |
| 12 | 54417913 | 54418152 | KD2-H4K8ac_peak_7055 | 4.70206  |                                                                                |
| 12 | 54422853 | 54423069 | KD2-H4K8ac_peak_7056 | 7.76329  |                                                                                |
| 12 | 54426955 | 54427517 | KD2-H4K8ac_peak_7057 | 9.36516  | HOXC5_ENSG00000172789;MIR615_ENSG00000207571                                   |
| 12 | 54427900 | 54428580 | KD2-H4K8ac_peak_7058 | 7.90806  | MIR615_ENSG00000207571                                                         |
| 12 | 54446348 | 54447484 | KD2-H4K8ac_peak_7059 | 16.15695 | HOXC4_ENSG00000273266                                                          |
| 12 | 54447797 | 54448057 | KD2-H4K8ac_peak_7060 | 8.55271  | HOXC4_ENSG00000273266                                                          |
| 12 | 54474392 | 54474598 | KD2-H4K8ac_peak_7061 | 7.18916  |                                                                                |
| 12 | 54476058 | 54476306 | KD2-H4K8ac_peak_7062 | 5.88845  | RP11-834C11.7_ENSG00000250654;RP11-834C11.6_ENSG00000249388                    |
| 12 | 54483418 | 54483731 | KD2-H4K8ac_peak_7063 | 5.14125  |                                                                                |
| 12 | 54483994 | 54484395 | KD2-H4K8ac_peak_7064 | 11.05407 |                                                                                |
| 12 | 54519906 | 54520491 | KD2-H4K8ac_peak_7065 | 7.07117  | RP11-834C11.5_ENSG00000250432;RP11-834C11.4_ENSG00000250742                    |
| 12 | 54521149 | 54521521 | KD2-H4K8ac_peak_7066 | 11.92978 |                                                                                |
| 12 | 54529181 | 54529534 | KD2-H4K8ac_peak_7067 | 9.36665  |                                                                                |
| 12 | 54566273 | 54567955 | KD2-H4K8ac_peak_7068 | 5.38581  |                                                                                |
| 12 | 54582417 | 54582667 | KD2-H4K8ac_peak_7069 | 8.37231  | SMUG1_ENSG00000123415                                                          |
| 12 | 54583031 | 54583512 | KD2-H4K8ac_peak_7070 | 10.59312 | SMUG1_ENSG00000123415                                                          |
| 12 | 54588561 | 54588902 | KD2-H4K8ac_peak_7071 | 4.211    |                                                                                |
| 12 | 54589500 | 54589700 | KD2-H4K8ac_peak_7072 | 7.31433  |                                                                                |
| 12 | 54589904 | 54590148 | KD2-H4K8ac_peak_7073 | 6.56211  |                                                                                |
| 12 | 54594985 | 54595183 | KD2-H4K8ac_peak_7074 | 7.99241  |                                                                                |
| 12 | 54652949 | 54653374 | KD2-H4K8ac_peak_7075 | 11.38361 |                                                                                |
| 12 | 54654022 | 54654355 | KD2-H4K8ac_peak_7076 | 10.29344 |                                                                                |
| 12 | 54717819 | 54718358 | KD2-H4K8ac_peak_7077 | 4.54006  |                                                                                |
| 12 | 54745412 | 54746924 | KD2-H4K8ac_peak_7078 | 12.08081 | RP11-753H16.3_ENSG00000258137;RP11-753H16.5_ENSG00000258086                    |
| 12 | 54747452 | 54747752 | KD2-H4K8ac_peak_7079 | 8.17902  | RP11-753H16.3_ENSG00000258137;RP11-753H16.5_ENSG00000258086                    |
| 12 | 54750910 | 54751163 | KD2-H4K8ac_peak_7080 | 3.75035  |                                                                                |
| 12 | 54752653 | 54752850 | KD2-H4K8ac_peak_7081 | 8.85813  |                                                                                |
| 12 | 54753451 | 54753654 | KD2-H4K8ac_peak_7082 | 4.67342  |                                                                                |

|    |          |          |                      |          |                                                                             |
|----|----------|----------|----------------------|----------|-----------------------------------------------------------------------------|
| 12 | 54784920 | 54785274 | KD2-H4K8ac_peak_7083 | 5.52329  | ZNF385A_ENSG00000161642                                                     |
| 12 | 56040190 | 56040497 | KD2-H4K8ac_peak_7084 | 14.15075 | OR10AE3P_ENSG00000272837                                                    |
| 12 | 56109361 | 56110420 | KD2-H4K8ac_peak_7085 | 11.92978 | ITGA7_ENSG00000135424;RP11-644F5.10_ENSG00000258311;BLOC1S1_ENSG00000135441 |
| 12 | 56122069 | 56123416 | KD2-H4K8ac_peak_7086 | 12.84642 | CD63_ENSG00000135404;RP11-644F5.11_ENSG00000258056                          |
| 12 | 56123643 | 56123926 | KD2-H4K8ac_peak_7087 | 10.87093 | CD63_ENSG00000135404;RP11-644F5.11_ENSG00000258056                          |
| 12 | 56131703 | 56132212 | KD2-H4K8ac_peak_7088 | 13.2669  |                                                                             |
| 12 | 56211063 | 56211438 | KD2-H4K8ac_peak_7089 | 5.20998  | SARNP_ENSG00000205323;ORMDL2_ENSG00000123353                                |
| 12 | 56222801 | 56223062 | KD2-H4K8ac_peak_7090 | 10.05606 | TMEM198B_ENSG00000182796                                                    |
| 12 | 56223667 | 56224117 | KD2-H4K8ac_peak_7091 | 10.96455 | DNAJC14_ENSG00000135392;TMEM198B_ENSG00000182796                            |
| 12 | 56241364 | 56241648 | KD2-H4K8ac_peak_7092 | 8.26945  |                                                                             |
| 12 | 56242271 | 56242566 | KD2-H4K8ac_peak_7093 | 11.05407 |                                                                             |
| 12 | 56320463 | 56322209 | KD2-H4K8ac_peak_7094 | 17.8868  | DGKA_ENSG00000065357                                                        |
| 12 | 56325221 | 56325541 | KD2-H4K8ac_peak_7095 | 5.75757  | WIBG_ENSG00000170473                                                        |
| 12 | 56334349 | 56334601 | KD2-H4K8ac_peak_7096 | 6.40683  |                                                                             |
| 12 | 56367904 | 56368185 | KD2-H4K8ac_peak_7097 | 10.29842 | PMEL_ENSG00000185664;RAB5B_ENSG00000111540                                  |
| 12 | 56401291 | 56401849 | KD2-H4K8ac_peak_7098 | 6.65673  | IKZF4_ENSG00000123411                                                       |
| 12 | 56414392 | 56414840 | KD2-H4K8ac_peak_7099 | 20.88898 |                                                                             |
| 12 | 56415144 | 56416138 | KD2-H4K8ac_peak_7100 | 18.09077 |                                                                             |
| 12 | 56435946 | 56436181 | KD2-H4K8ac_peak_7101 | 12.08081 | RP11-603J24.4_ENSG00000257449;RPS26_ENSG00000197728                         |
| 12 | 56472998 | 56473567 | KD2-H4K8ac_peak_7102 | 12.84642 | ERBB3_ENSG00000065361                                                       |
| 12 | 56473767 | 56474261 | KD2-H4K8ac_peak_7103 | 15.59774 | ERBB3_ENSG00000065361                                                       |
| 12 | 56498402 | 56498751 | KD2-H4K8ac_peak_7104 | 6.67538  | PA2G4_ENSG00000170515                                                       |
| 12 | 56509270 | 56509875 | KD2-H4K8ac_peak_7105 | 10.96455 | RPL41_ENSG00000229117                                                       |
| 12 | 56512123 | 56512418 | KD2-H4K8ac_peak_7106 | 10.53377 | ZC3H10_ENSG00000135482;ESYT1_ENSG00000139641                                |
| 12 | 56522139 | 56522332 | KD2-H4K8ac_peak_7107 | 6.90231  |                                                                             |
| 12 | 56545633 | 56546240 | KD2-H4K8ac_peak_7108 | 5.75757  | MYL6B_ENSG00000196465                                                       |
| 12 | 56551232 | 56551836 | KD2-H4K8ac_peak_7109 | 8.20667  | RP11-603J24.14_ENSG00000257809;MYL6_ENSG00000092841                         |
| 12 | 56583840 | 56584038 | KD2-H4K8ac_peak_7110 | 9.36516  | RP11-977G19.5_ENSG00000258199;SMARCC2_ENSG00000139613                       |
| 12 | 56587178 | 56587377 | KD2-H4K8ac_peak_7111 | 3.99369  |                                                                             |
| 12 | 56615369 | 56615577 | KD2-H4K8ac_peak_7112 | 4.86324  | RNF41_ENSG00000181852;NABP2_ENSG00000139579                                 |
| 12 | 56615881 | 56616425 | KD2-H4K8ac_peak_7113 | 9.96798  | RNF41_ENSG00000181852;NABP2_ENSG00000139579                                 |
| 12 | 56617546 | 56617791 | KD2-H4K8ac_peak_7114 | 7.98621  |                                                                             |
| 12 | 56618246 | 56618744 | KD2-H4K8ac_peak_7115 | 6.97919  |                                                                             |
| 12 | 56652276 | 56652477 | KD2-H4K8ac_peak_7116 | 12.70959 | ANKRD52_ENSG00000139645                                                     |
| 12 | 56660232 | 56660852 | KD2-H4K8ac_peak_7117 | 8.55271  | COQ10A_ENSG00000135469                                                      |
| 12 | 56661085 | 56661537 | KD2-H4K8ac_peak_7118 | 6.2781   | COQ10A_ENSG00000135469                                                      |
| 12 | 56693605 | 56694084 | KD2-H4K8ac_peak_7119 | 8.55271  | CS_ENSG00000062485;RP11-977G19.11_ENSG00000257303                           |
| 12 | 56710007 | 56710633 | KD2-H4K8ac_peak_7120 | 5.75757  | RP11-977G19.10_ENSG00000144785;CNPY2_ENSG00000257727                        |
| 12 | 56726699 | 56727140 | KD2-H4K8ac_peak_7121 | 9.26408  | PAN2_ENSG00000135473                                                        |
| 12 | 56728120 | 56728518 | KD2-H4K8ac_peak_7122 | 11.92978 | PAN2_ENSG00000135473                                                        |
| 12 | 56729138 | 56729330 | KD2-H4K8ac_peak_7123 | 4.35346  |                                                                             |
| 12 | 56753443 | 56753842 | KD2-H4K8ac_peak_7124 | 7.146    | STAT2_ENSG00000170581                                                       |
| 12 | 56841901 | 56842131 | KD2-H4K8ac_peak_7125 | 8.53092  |                                                                             |
| 12 | 56842717 | 56843228 | KD2-H4K8ac_peak_7126 | 8.55271  | TIMELESS_ENSG00000111602                                                    |
| 12 | 56843876 | 56844143 | KD2-H4K8ac_peak_7127 | 4.77079  | TIMELESS_ENSG00000111602                                                    |
| 12 | 56862470 | 56862808 | KD2-H4K8ac_peak_7128 | 4.67342  | MIP_ENSG00000135517;SPRYD4_ENSG00000176422                                  |

|    |          |          |                      |          |                                                        |
|----|----------|----------|----------------------|----------|--------------------------------------------------------|
| 12 | 56881804 | 56882127 | KD2-H4K8ac_peak_7129 | 8.2413   |                                                        |
| 12 | 56882361 | 56882607 | KD2-H4K8ac_peak_7130 | 7.47462  |                                                        |
| 12 | 57023753 | 57023996 | KD2-H4K8ac_peak_7131 | 6.66359  |                                                        |
| 12 | 57028054 | 57028565 | KD2-H4K8ac_peak_7132 | 4.19765  |                                                        |
| 12 | 57029788 | 57030047 | KD2-H4K8ac_peak_7133 | 11.47498 | BAZ2A_ENSG00000076108                                  |
| 12 | 57081611 | 57081913 | KD2-H4K8ac_peak_7134 | 12.93209 | PTGES3_ENSG00000110958                                 |
| 12 | 57082397 | 57082873 | KD2-H4K8ac_peak_7135 | 13.73635 | PTGES3_ENSG00000110958                                 |
| 12 | 57118386 | 57119039 | KD2-H4K8ac_peak_7136 | 12.93253 |                                                        |
| 12 | 57146493 | 57146704 | KD2-H4K8ac_peak_7137 | 6.31143  | PRIM1_ENSG00000198056;HSD17B6_ENSG00000025423          |
| 12 | 57399742 | 57400284 | KD2-H4K8ac_peak_7138 | 15.039   | ZBTB39_ENSG00000166860                                 |
| 12 | 57420960 | 57421274 | KD2-H4K8ac_peak_7139 | 5.54647  |                                                        |
| 12 | 57479786 | 57480176 | KD2-H4K8ac_peak_7140 | 8.30094  |                                                        |
| 12 | 57480762 | 57481033 | KD2-H4K8ac_peak_7141 | 9.63487  | TMEM194A_ENSG00000166881                               |
| 12 | 57481252 | 57481633 | KD2-H4K8ac_peak_7142 | 19.72117 | TMEM194A_ENSG00000166881                               |
| 12 | 57481995 | 57482345 | KD2-H4K8ac_peak_7143 | 4.86324  | TMEM194A_ENSG00000166881;NAB2_ENSG00000166886          |
| 12 | 57505406 | 57505771 | KD2-H4K8ac_peak_7144 | 5.57044  |                                                        |
| 12 | 57506083 | 57506318 | KD2-H4K8ac_peak_7145 | 6.98292  |                                                        |
| 12 | 57521412 | 57522105 | KD2-H4K8ac_peak_7146 | 10.96455 | LRP1_ENSG00000123384                                   |
| 12 | 57529683 | 57529931 | KD2-H4K8ac_peak_7147 | 4.86324  |                                                        |
| 12 | 57545834 | 57546482 | KD2-H4K8ac_peak_7148 | 7.79741  |                                                        |
| 12 | 57546680 | 57547302 | KD2-H4K8ac_peak_7149 | 8.85813  |                                                        |
| 12 | 57547806 | 57548700 | KD2-H4K8ac_peak_7150 | 8.56219  |                                                        |
| 12 | 57552073 | 57552282 | KD2-H4K8ac_peak_7151 | 7.13615  |                                                        |
| 12 | 57631764 | 57632023 | KD2-H4K8ac_peak_7152 | 7.76329  |                                                        |
| 12 | 57632251 | 57632922 | KD2-H4K8ac_peak_7153 | 9.46843  |                                                        |
| 12 | 57633151 | 57634320 | KD2-H4K8ac_peak_7154 | 25.87783 | NDUFA4L2_ENSG00000185633                               |
| 12 | 57824219 | 57824621 | KD2-H4K8ac_peak_7155 | 8.85813  | R3HDM2_ENSG00000179912;RP11-756H6.1_ENSG00000258001    |
| 12 | 57824900 | 57825437 | KD2-H4K8ac_peak_7156 | 10.0692  | R3HDM2_ENSG00000179912;RP11-756H6.1_ENSG00000258001    |
| 12 | 57848446 | 57849038 | KD2-H4K8ac_peak_7157 | 12.74183 |                                                        |
| 12 | 57849272 | 57849685 | KD2-H4K8ac_peak_7158 | 5.01002  |                                                        |
| 12 | 57881020 | 57881616 | KD2-H4K8ac_peak_7159 | 17.37958 | ARHGAP9_ENSG00000123329                                |
| 12 | 57881840 | 57882369 | KD2-H4K8ac_peak_7160 | 18.5703  | ARHGAP9_ENSG00000123329                                |
| 12 | 57914752 | 57915640 | KD2-H4K8ac_peak_7161 | 13.73635 | DDIT3_ENSG00000175197;MBD6_ENSG00000166987             |
| 12 | 57940344 | 57940962 | KD2-H4K8ac_peak_7162 | 16.61426 | DCTN2_ENSG00000175203                                  |
| 12 | 57943184 | 57943521 | KD2-H4K8ac_peak_7163 | 4.04573  | KIF5A_ENSG00000155980                                  |
| 12 | 57946500 | 57946803 | KD2-H4K8ac_peak_7164 | 7.01658  |                                                        |
| 12 | 57984478 | 57984839 | KD2-H4K8ac_peak_7165 | 5.01002  | PIP4K2C_ENSG00000166908                                |
| 12 | 57998204 | 57999025 | KD2-H4K8ac_peak_7166 | 14.66631 | DTX3_ENSG00000178498                                   |
| 12 | 58004230 | 58005737 | KD2-H4K8ac_peak_7167 | 20.46575 | ARHGEF25_ENSG00000240771                               |
| 12 | 58026084 | 58026290 | KD2-H4K8ac_peak_7168 | 5.30799  | B4GALNT1_ENSG00000135454                               |
| 12 | 58026615 | 58026957 | KD2-H4K8ac_peak_7169 | 15.22643 | B4GALNT1_ENSG00000135454                               |
| 12 | 58087273 | 58087479 | KD2-H4K8ac_peak_7170 | 5.20908  | OS9_ENSG00000135506                                    |
| 12 | 58119637 | 58119893 | KD2-H4K8ac_peak_7171 | 7.36799  | RP11-571M6.8_ENSG00000257499;AGAP2-AS1_ENSG00000255737 |
| 12 | 58120142 | 58121248 | KD2-H4K8ac_peak_7172 | 13.31016 | RP11-571M6.8_ENSG00000257499;AGAP2-AS1_ENSG00000255737 |
| 12 | 58131794 | 58132061 | KD2-H4K8ac_peak_7173 | 5.57044  | TSPAN31_ENSG00000135452                                |
| 12 | 58137909 | 58138557 | KD2-H4K8ac_peak_7174 | 9.11031  |                                                        |



|    |          |          |                      |          |                                                                                 |
|----|----------|----------|----------------------|----------|---------------------------------------------------------------------------------|
| 12 | 58138810 | 58139060 | KD2-H4K8ac_peak_7175 | 18.89109 |                                                                                 |
| 12 | 58145363 | 58146080 | KD2-H4K8ac_peak_7176 | 11.00372 |                                                                                 |
| 12 | 58148174 | 58148379 | KD2-H4K8ac_peak_7177 | 5.14125  | MARCH9_ENSG00000139266                                                          |
| 12 | 58148895 | 58149095 | KD2-H4K8ac_peak_7178 | 12.46264 | CDK4_ENSG00000135446;MARCH9_ENSG00000139266                                     |
| 12 | 58166064 | 58167028 | KD2-H4K8ac_peak_7179 | 17.19888 | METTL1_ENSG00000037897;METTL21B_ENSG00000123427;RP11-571M6.15_ENSG000000257921  |
| 12 | 58234071 | 58234355 | KD2-H4K8ac_peak_7180 | 7.84888  |                                                                                 |
| 12 | 58238896 | 58239460 | KD2-H4K8ac_peak_7181 | 8.55271  |                                                                                 |
| 12 | 58240028 | 58240713 | KD2-H4K8ac_peak_7182 | 12.00597 | CTDSP2_ENSG00000175215                                                          |
| 12 | 58281728 | 58281928 | KD2-H4K8ac_peak_7183 | 4.77079  |                                                                                 |
| 12 | 58282425 | 58282634 | KD2-H4K8ac_peak_7184 | 7.47462  |                                                                                 |
| 12 | 58283488 | 58283856 | KD2-H4K8ac_peak_7185 | 6.24114  |                                                                                 |
| 12 | 58287071 | 58287858 | KD2-H4K8ac_peak_7186 | 9.63487  |                                                                                 |
| 12 | 58288235 | 58288562 | KD2-H4K8ac_peak_7187 | 9.36516  |                                                                                 |
| 12 | 58290059 | 58291033 | KD2-H4K8ac_peak_7188 | 17.09549 | RP11-620J15.2_ENSG00000245651                                                   |
| 12 | 58298813 | 58299055 | KD2-H4K8ac_peak_7189 | 3.75035  |                                                                                 |
| 12 | 62653510 | 62653979 | KD2-H4K8ac_peak_7190 | 11.89502 | USP15_ENSG00000135655                                                           |
| 12 | 62860683 | 62861035 | KD2-H4K8ac_peak_7191 | 5.59859  | MON2_ENSG00000061987                                                            |
| 12 | 62996052 | 62997743 | KD2-H4K8ac_peak_7192 | 14.98936 | C12orf61_ENSG00000221949;RP11-631N16.2_ENSG00000257354;MIRLET71_ENSG00000199179 |
| 12 | 63025715 | 63026673 | KD2-H4K8ac_peak_7193 | 16.64426 |                                                                                 |
| 12 | 63104865 | 63105139 | KD2-H4K8ac_peak_7194 | 5.88845  |                                                                                 |
| 12 | 63108805 | 63109222 | KD2-H4K8ac_peak_7195 | 6.00226  |                                                                                 |
| 12 | 64061848 | 64062924 | KD2-H4K8ac_peak_7196 | 11.3394  | DPY19L2_ENSG00000177990                                                         |
| 12 | 64173672 | 64174243 | KD2-H4K8ac_peak_7197 | 11.05407 | TMEM5_ENSG00000118600                                                           |
| 12 | 64237234 | 64237460 | KD2-H4K8ac_peak_7198 | 12.74171 | SRGAP1_ENSG00000196935                                                          |
| 12 | 64237969 | 64238519 | KD2-H4K8ac_peak_7199 | 11.05407 | SRGAP1_ENSG00000196935                                                          |
| 12 | 64331608 | 64331864 | KD2-H4K8ac_peak_7200 | 6.05809  |                                                                                 |
| 12 | 64333799 | 64334120 | KD2-H4K8ac_peak_7201 | 6.8836   |                                                                                 |
| 12 | 64334343 | 64334545 | KD2-H4K8ac_peak_7202 | 6.00243  |                                                                                 |
| 12 | 64338545 | 64338771 | KD2-H4K8ac_peak_7203 | 11.30637 |                                                                                 |
| 12 | 64347206 | 64347505 | KD2-H4K8ac_peak_7204 | 6.16888  |                                                                                 |
| 12 | 64616174 | 64616574 | KD2-H4K8ac_peak_7205 | 5.4779   | C12orf66_ENSG00000174206;RPS11P6_ENSG00000243024                                |
| 12 | 64797550 | 64797970 | KD2-H4K8ac_peak_7206 | 5.75452  | XPOT_ENSG00000184575                                                            |
| 12 | 64798335 | 64798834 | KD2-H4K8ac_peak_7207 | 15.57998 | XPOT_ENSG00000184575                                                            |
| 12 | 64800215 | 64800453 | KD2-H4K8ac_peak_7208 | 4.42765  |                                                                                 |
| 12 | 64845524 | 64845738 | KD2-H4K8ac_peak_7209 | 10.05606 | TBK1_ENSG00000183735                                                            |
| 12 | 64845931 | 64846307 | KD2-H4K8ac_peak_7210 | 11.28831 | TBK1_ENSG00000183735                                                            |
| 12 | 64936535 | 64936761 | KD2-H4K8ac_peak_7211 | 9.11031  |                                                                                 |
| 12 | 64977328 | 64977734 | KD2-H4K8ac_peak_7212 | 7.40111  |                                                                                 |
| 12 | 64978900 | 64979111 | KD2-H4K8ac_peak_7213 | 4.3015   |                                                                                 |
| 12 | 65004279 | 65004994 | KD2-H4K8ac_peak_7214 | 11.90517 | RASSF3_ENSG00000153179                                                          |
| 12 | 65063355 | 65063555 | KD2-H4K8ac_peak_7215 | 7.167    |                                                                                 |
| 12 | 65065992 | 65066445 | KD2-H4K8ac_peak_7216 | 15.81711 |                                                                                 |
| 12 | 65076150 | 65076402 | KD2-H4K8ac_peak_7217 | 8.5781   |                                                                                 |
| 12 | 65076808 | 65077005 | KD2-H4K8ac_peak_7218 | 5.88845  |                                                                                 |
| 12 | 65153944 | 65154197 | KD2-H4K8ac_peak_7219 | 7.33266  | GNS_ENSG00000135677;RP11-629N8.3_ENSG00000215159;snoU13_ENSG00000238592         |
| 12 | 65562832 | 65563212 | KD2-H4K8ac_peak_7220 | 10.43145 | LEMD3_ENSG00000174106                                                           |

|    |          |          |                      |          |                                                       |
|----|----------|----------|----------------------|----------|-------------------------------------------------------|
| 12 | 65563501 | 65564047 | KD2-H4K8ac_peak_7221 | 15.58442 | LEMD3_ENSG00000174106                                 |
| 12 | 65672287 | 65672710 | KD2-H4K8ac_peak_7222 | 7.40314  | MSRB3_ENSG00000174099                                 |
| 12 | 66563216 | 66564191 | KD2-H4K8ac_peak_7223 | 19.41412 | TMBIM4_ENSG00000228144;TMBIM4_ENSG00000155957         |
| 12 | 66629201 | 66629405 | KD2-H4K8ac_peak_7224 | 5.25071  | RBMS1P1_ENSG00000225422;AC078889.1_ENSG00000266539    |
| 12 | 67663187 | 67664130 | KD2-H4K8ac_peak_7225 | 6.66359  | CAND1_ENSG00000111530                                 |
| 12 | 68042581 | 68043866 | KD2-H4K8ac_peak_7226 | 15.22643 | DYRK2_ENSG00000127334                                 |
| 12 | 68120431 | 68121390 | KD2-H4K8ac_peak_7227 | 8.1233   |                                                       |
| 12 | 68122495 | 68122804 | KD2-H4K8ac_peak_7228 | 6.64891  | RP11-43N5.1_ENSG00000255970                           |
| 12 | 68123129 | 68123391 | KD2-H4K8ac_peak_7229 | 6.16888  | RP11-43N5.1_ENSG00000255970                           |
| 12 | 68639247 | 68640152 | KD2-H4K8ac_peak_7230 | 10.63441 |                                                       |
| 12 | 68725760 | 68726089 | KD2-H4K8ac_peak_7231 | 15.69572 | MDM1_ENSG00000111554                                  |
| 12 | 68800093 | 68800292 | KD2-H4K8ac_peak_7232 | 5.57044  |                                                       |
| 12 | 69004228 | 69004427 | KD2-H4K8ac_peak_7233 | 11.05407 | RAP1B_ENSG00000127314                                 |
| 12 | 69080790 | 69081377 | KD2-H4K8ac_peak_7234 | 15.9336  | RP11-637A17.2_ENSG00000247363;NUP107_ENSG00000111581  |
| 12 | 69139355 | 69139717 | KD2-H4K8ac_peak_7235 | 6.25869  | SLC35E3_ENSG00000175782                               |
| 12 | 69201275 | 69201728 | KD2-H4K8ac_peak_7236 | 5.9696   | MDM2_ENSG00000135679                                  |
| 12 | 69202034 | 69202287 | KD2-H4K8ac_peak_7237 | 12.14909 | MDM2_ENSG00000135679                                  |
| 12 | 69633432 | 69634256 | KD2-H4K8ac_peak_7238 | 15.69572 | CPSF6_ENSG00000111605                                 |
| 12 | 69724889 | 69725275 | KD2-H4K8ac_peak_7239 | 7.12754  |                                                       |
| 12 | 69753547 | 69753782 | KD2-H4K8ac_peak_7240 | 11.24702 | YEATS4_ENSG00000127337                                |
| 12 | 69864204 | 69864412 | KD2-H4K8ac_peak_7241 | 16.15695 | FRS2_ENSG00000166225                                  |
| 12 | 69977955 | 69978359 | KD2-H4K8ac_peak_7242 | 5.53095  | MIR3913-1_ENSG00000264405;CCT2_ENSG00000166226        |
| 12 | 69979266 | 69979534 | KD2-H4K8ac_peak_7243 | 11.24702 | MIR3913-1_ENSG00000264405;CCT2_ENSG00000166226        |
| 12 | 70132719 | 70132962 | KD2-H4K8ac_peak_7244 | 7.36799  | RP11-588G21.2_ENSG00000247131;RAB3IP_ENSG00000127328  |
| 12 | 70272891 | 70273208 | KD2-H4K8ac_peak_7245 | 3.75035  |                                                       |
| 12 | 70636813 | 70637861 | KD2-H4K8ac_peak_7246 | 6.84261  | RP11-611E13.2_ENSG00000257815;CNOT2_ENSG00000111596   |
| 12 | 71113435 | 71113644 | KD2-H4K8ac_peak_7247 | 6.00226  |                                                       |
| 12 | 71951945 | 71952385 | KD2-H4K8ac_peak_7248 | 5.1313   |                                                       |
| 12 | 71957049 | 71957435 | KD2-H4K8ac_peak_7249 | 12.3187  |                                                       |
| 12 | 72057229 | 72057578 | KD2-H4K8ac_peak_7250 | 12.46522 | THAP2_ENSG00000173451                                 |
| 12 | 72058174 | 72058437 | KD2-H4K8ac_peak_7251 | 7.76329  |                                                       |
| 12 | 72079219 | 72079466 | KD2-H4K8ac_peak_7252 | 9.16531  | TMEM19_ENSG00000139291                                |
| 12 | 72079877 | 72080089 | KD2-H4K8ac_peak_7253 | 7.76329  | TMEM19_ENSG00000139291                                |
| 12 | 72147812 | 72148053 | KD2-H4K8ac_peak_7254 | 3.80759  | RAB21_ENSG00000080371                                 |
| 12 | 72148702 | 72149249 | KD2-H4K8ac_peak_7255 | 5.01002  | RAB21_ENSG00000080371                                 |
| 12 | 72232802 | 72233438 | KD2-H4K8ac_peak_7256 | 12.93209 | TBC1D15_ENSG00000121749                               |
| 12 | 72666685 | 72666922 | KD2-H4K8ac_peak_7257 | 6.40683  |                                                       |
| 12 | 74931665 | 74931879 | KD2-H4K8ac_peak_7258 | 6.04107  | ATXN7L3B_ENSG00000253719;RP11-56G10.2_ENSG00000257386 |
| 12 | 75785032 | 75785260 | KD2-H4K8ac_peak_7259 | 10.05606 | CAPS2_ENSG00000180881                                 |
| 12 | 75904995 | 75905338 | KD2-H4K8ac_peak_7260 | 13.57066 | KRR1_ENSG00000111615                                  |
| 12 | 75905968 | 75906288 | KD2-H4K8ac_peak_7261 | 4.77079  | KRR1_ENSG00000111615                                  |
| 12 | 75986475 | 75987027 | KD2-H4K8ac_peak_7262 | 7.47462  |                                                       |
| 12 | 76101101 | 76101319 | KD2-H4K8ac_peak_7263 | 8.1718   |                                                       |
| 12 | 76116266 | 76116474 | KD2-H4K8ac_peak_7264 | 5.57044  |                                                       |
| 12 | 76204999 | 76205546 | KD2-H4K8ac_peak_7265 | 8.41122  |                                                       |
| 12 | 76235269 | 76235600 | KD2-H4K8ac_peak_7266 | 5.57044  |                                                       |

|    |          |          |                      |          |                                                                                                        |
|----|----------|----------|----------------------|----------|--------------------------------------------------------------------------------------------------------|
| 12 | 76247789 | 76248001 | KD2-H4K8ac_peak_7267 | 4.211    |                                                                                                        |
| 12 | 76353871 | 76354083 | KD2-H4K8ac_peak_7268 | 4.59928  |                                                                                                        |
| 12 | 76395518 | 76395969 | KD2-H4K8ac_peak_7269 | 8.25022  |                                                                                                        |
| 12 | 76408665 | 76408910 | KD2-H4K8ac_peak_7270 | 10.86378 |                                                                                                        |
| 12 | 76423910 | 76424149 | KD2-H4K8ac_peak_7271 | 5.61067  | RP11-290L1.3_ENSG00000257453                                                                           |
| 12 | 76425646 | 76426142 | KD2-H4K8ac_peak_7272 | 11.32417 | RP11-290L1.2_ENSG00000257839                                                                           |
| 12 | 76477955 | 76478370 | KD2-H4K8ac_peak_7273 | 12.82393 | NAP1L1_ENSG00000187109                                                                                 |
| 12 | 76742344 | 76743095 | KD2-H4K8ac_peak_7274 | 8.26945  | BBS10_ENSG00000179941                                                                                  |
| 12 | 76953045 | 76953261 | KD2-H4K8ac_peak_7275 | 5.9696   | OSBPL8_ENSG00000091039                                                                                 |
| 12 | 76954802 | 76954994 | KD2-H4K8ac_peak_7276 | 5.29352  |                                                                                                        |
| 12 | 77158062 | 77158506 | KD2-H4K8ac_peak_7277 | 15.61313 | ZDHHC17_ENSG00000186908                                                                                |
| 12 | 77272983 | 77273518 | KD2-H4K8ac_peak_7278 | 17.42214 | CSRP2_ENSG00000175183                                                                                  |
| 12 | 77336783 | 77336979 | KD2-H4K8ac_peak_7279 | 6.40683  |                                                                                                        |
| 12 | 77345066 | 77345403 | KD2-H4K8ac_peak_7280 | 9.82729  |                                                                                                        |
| 12 | 77458987 | 77459255 | KD2-H4K8ac_peak_7281 | 8.23274  | E2F7_ENSG00000165891                                                                                   |
| 12 | 78490458 | 78490725 | KD2-H4K8ac_peak_7282 | 4.9025   |                                                                                                        |
| 12 | 79257271 | 79258168 | KD2-H4K8ac_peak_7283 | 14.45402 | SYT1_ENSG00000067715                                                                                   |
| 12 | 80328369 | 80328564 | KD2-H4K8ac_peak_7284 | 6.84261  | PPP1R12A_ENSG00000058272;RP11-84G21.1_ENSG00000257557                                                  |
| 12 | 80329070 | 80329423 | KD2-H4K8ac_peak_7285 | 15.13261 | PPP1R12A_ENSG00000058272;RP11-84G21.1_ENSG00000257557                                                  |
| 12 | 82751661 | 82752560 | KD2-H4K8ac_peak_7286 | 15.53798 | CCDC59_ENSG00000133773;METTL25_ENSG00000127720                                                         |
| 12 | 83102451 | 83102672 | KD2-H4K8ac_peak_7287 | 11.30637 |                                                                                                        |
| 12 | 83210796 | 83211064 | KD2-H4K8ac_peak_7288 | 9.72244  |                                                                                                        |
| 12 | 84902132 | 84902403 | KD2-H4K8ac_peak_7289 | 5.25071  |                                                                                                        |
| 12 | 85711802 | 85712063 | KD2-H4K8ac_peak_7290 | 10.21502 | RP11-408B11.2_ENSG00000258815                                                                          |
| 12 | 88429386 | 88429703 | KD2-H4K8ac_peak_7291 | 7.27716  |                                                                                                        |
| 12 | 88535453 | 88535784 | KD2-H4K8ac_peak_7292 | 7.70289  | CEP290_ENSG00000198707;TMTC3_ENSG00000139324                                                           |
| 12 | 88536205 | 88536732 | KD2-H4K8ac_peak_7293 | 6.94255  | CEP290_ENSG00000198707;TMTC3_ENSG00000139324                                                           |
| 12 | 88889281 | 88889619 | KD2-H4K8ac_peak_7294 | 5.73839  |                                                                                                        |
| 12 | 88960384 | 88960592 | KD2-H4K8ac_peak_7295 | 4.77079  |                                                                                                        |
| 12 | 88973874 | 88974082 | KD2-H4K8ac_peak_7296 | 6.30229  | KITLG_ENSG00000049130                                                                                  |
| 12 | 88974321 | 88974579 | KD2-H4K8ac_peak_7297 | 12.57865 | KITLG_ENSG00000049130;RNU1-117P_ENSG00000252850                                                        |
| 12 | 89410715 | 89411022 | KD2-H4K8ac_peak_7298 | 12.06346 |                                                                                                        |
| 12 | 89493059 | 89493413 | KD2-H4K8ac_peak_7299 | 4.77079  |                                                                                                        |
| 12 | 89495363 | 89495619 | KD2-H4K8ac_peak_7300 | 4.211    |                                                                                                        |
| 12 | 89511359 | 89511721 | KD2-H4K8ac_peak_7301 | 4.37708  |                                                                                                        |
| 12 | 89604228 | 89604430 | KD2-H4K8ac_peak_7302 | 7.12754  |                                                                                                        |
| 12 | 89670752 | 89670994 | KD2-H4K8ac_peak_7303 | 5.58333  |                                                                                                        |
| 12 | 89671860 | 89672493 | KD2-H4K8ac_peak_7304 | 5.75452  |                                                                                                        |
| 12 | 89673364 | 89673675 | KD2-H4K8ac_peak_7305 | 7.48133  |                                                                                                        |
| 12 | 89739507 | 89739864 | KD2-H4K8ac_peak_7306 | 6.66692  |                                                                                                        |
| 12 | 89745168 | 89745401 | KD2-H4K8ac_peak_7307 | 9.36665  |                                                                                                        |
| 12 | 89745595 | 89745871 | KD2-H4K8ac_peak_7308 | 4.37809  |                                                                                                        |
| 12 | 89746545 | 89748707 | KD2-H4K8ac_peak_7309 | 12.93209 | DUSP6_ENSG00000139318                                                                                  |
| 12 | 89919338 | 89920002 | KD2-H4K8ac_peak_7310 | 11.24702 | POC1B_ENSG00000139323;GALNT4_ENSG00000257594;POC1B-GALNT4_ENSG00000259075;RP11-734K2.4_ENSG00000270344 |
| 12 | 89920216 | 89920594 | KD2-H4K8ac_peak_7311 | 4.44748  | POC1B_ENSG00000139323;GALNT4_ENSG00000257594;POC1B-GALNT4_ENSG00000259075;RP11-734K2.4_ENSG00000270344 |
| 12 | 91950328 | 91951137 | KD2-H4K8ac_peak_7312 | 9.16531  |                                                                                                        |

|    |          |          |                      |          |                                                     |
|----|----------|----------|----------------------|----------|-----------------------------------------------------|
| 12 | 92540142 | 92540346 | KD2-H4K8ac_peak_7313 | 6.60096  | BTG1_ENSG00000133639;RP11-796E2.4_ENSG00000245904   |
| 12 | 92618590 | 92618810 | KD2-H4K8ac_peak_7314 | 8.17902  |                                                     |
| 12 | 92690803 | 92691018 | KD2-H4K8ac_peak_7315 | 4.59928  |                                                     |
| 12 | 92758191 | 92758421 | KD2-H4K8ac_peak_7316 | 11.05407 |                                                     |
| 12 | 92805699 | 92805898 | KD2-H4K8ac_peak_7317 | 5.73839  |                                                     |
| 12 | 93494030 | 93494372 | KD2-H4K8ac_peak_7318 | 3.75035  |                                                     |
| 12 | 93578377 | 93578642 | KD2-H4K8ac_peak_7319 | 7.12754  |                                                     |
| 12 | 93693580 | 93693808 | KD2-H4K8ac_peak_7320 | 9.06369  |                                                     |
| 12 | 93770320 | 93770924 | KD2-H4K8ac_peak_7321 | 9.68448  | RP11-486A14.2_ENSG00000257252;NUDT4_ENSG00000173598 |
| 12 | 93771985 | 93772198 | KD2-H4K8ac_peak_7322 | 6.0605   | RP11-486A14.2_ENSG00000257252;NUDT4_ENSG00000173598 |
| 12 | 93834962 | 93835676 | KD2-H4K8ac_peak_7323 | 16.15695 | UBE2N_ENSG00000177889                               |
| 12 | 93836001 | 93836342 | KD2-H4K8ac_peak_7324 | 6.40297  | UBE2N_ENSG00000177889                               |
| 12 | 93860769 | 93861004 | KD2-H4K8ac_peak_7325 | 8.02571  | MRPL42_ENSG00000198015                              |
| 12 | 93861321 | 93861713 | KD2-H4K8ac_peak_7326 | 13.81781 | MRPL42_ENSG00000198015                              |
| 12 | 93964226 | 93964497 | KD2-H4K8ac_peak_7327 | 8.4716   | SOCS2_ENSG00000120833                               |
| 12 | 93964914 | 93965479 | KD2-H4K8ac_peak_7328 | 12.08081 | SOCS2-AS1_ENSG00000246985                           |
| 12 | 93965709 | 93966029 | KD2-H4K8ac_peak_7329 | 11.05407 | SOCS2-AS1_ENSG00000246985                           |
| 12 | 93984211 | 93984418 | KD2-H4K8ac_peak_7330 | 5.14125  |                                                     |
| 12 | 93985245 | 93985452 | KD2-H4K8ac_peak_7331 | 5.54647  |                                                     |
| 12 | 94070214 | 94070878 | KD2-H4K8ac_peak_7332 | 10.25088 | CRADD_ENSG00000169372                               |
| 12 | 94071286 | 94071697 | KD2-H4K8ac_peak_7333 | 9.36665  | CRADD_ENSG00000169372                               |
| 12 | 94072808 | 94073053 | KD2-H4K8ac_peak_7334 | 6.78668  |                                                     |
| 12 | 94076888 | 94077081 | KD2-H4K8ac_peak_7335 | 5.75452  |                                                     |
| 12 | 94135432 | 94135706 | KD2-H4K8ac_peak_7336 | 5.3778   |                                                     |
| 12 | 94179171 | 94179560 | KD2-H4K8ac_peak_7337 | 7.12754  |                                                     |
| 12 | 94288259 | 94288591 | KD2-H4K8ac_peak_7338 | 8.83582  |                                                     |
| 12 | 94495484 | 94496039 | KD2-H4K8ac_peak_7339 | 24.1491  |                                                     |
| 12 | 94496405 | 94496609 | KD2-H4K8ac_peak_7340 | 5.54647  |                                                     |
| 12 | 94558859 | 94559051 | KD2-H4K8ac_peak_7341 | 4.66652  |                                                     |
| 12 | 94656363 | 94656782 | KD2-H4K8ac_peak_7342 | 5.13615  |                                                     |
| 12 | 94853753 | 94854350 | KD2-H4K8ac_peak_7343 | 20.08519 | CCDC41_ENSG00000173588                              |
| 12 | 94927032 | 94927267 | KD2-H4K8ac_peak_7344 | 11.89502 |                                                     |
| 12 | 95267115 | 95267372 | KD2-H4K8ac_peak_7345 | 7.76329  |                                                     |
| 12 | 95267588 | 95267968 | KD2-H4K8ac_peak_7346 | 12.81138 |                                                     |
| 12 | 95610800 | 95611109 | KD2-H4K8ac_peak_7347 | 5.84991  | FGD6_ENSG00000180263;VEZT_ENSG00000028203           |
| 12 | 95611643 | 95612042 | KD2-H4K8ac_peak_7348 | 7.0754   | FGD6_ENSG00000180263;VEZT_ENSG00000028203           |
| 12 | 95868038 | 95868302 | KD2-H4K8ac_peak_7349 | 9.20193  | METAP2_ENSG00000111142                              |
| 12 | 95941967 | 95942469 | KD2-H4K8ac_peak_7350 | 10.96455 |                                                     |
| 12 | 96252817 | 96253053 | KD2-H4K8ac_peak_7351 | 6.8713   | RP11-536G4.2_ENSG00000258343;SNRPF_ENSG00000139343  |
| 12 | 96336348 | 96336977 | KD2-H4K8ac_peak_7352 | 28.04957 | CCDC38_ENSG00000165972;AMDHD1_ENSG00000139344       |
| 12 | 96337182 | 96337713 | KD2-H4K8ac_peak_7353 | 5.14125  | CCDC38_ENSG00000165972;AMDHD1_ENSG00000139344       |
| 12 | 96360496 | 96360896 | KD2-H4K8ac_peak_7354 | 4.42765  |                                                     |
| 12 | 96428958 | 96429218 | KD2-H4K8ac_peak_7355 | 5.01002  |                                                     |
| 12 | 96514850 | 96515151 | KD2-H4K8ac_peak_7356 | 4.0528   |                                                     |
| 12 | 96546103 | 96546297 | KD2-H4K8ac_peak_7357 | 13.81781 |                                                     |
| 12 | 96546829 | 96547132 | KD2-H4K8ac_peak_7358 | 5.30799  |                                                     |

|    |           |          |                      |          |                                                                               |
|----|-----------|----------|----------------------|----------|-------------------------------------------------------------------------------|
| 12 | 96587756  | 96588452 | KD2-H4K8ac_peak_7359 | 14.68449 | ELK3_ENSG00000111145                                                          |
| 12 | 96588758  | 96589261 | KD2-H4K8ac_peak_7360 | 4.86324  | ELK3_ENSG00000111145                                                          |
| 12 | 96634297  | 96634576 | KD2-H4K8ac_peak_7361 | 10.0692  |                                                                               |
| 12 | 96793258  | 96794168 | KD2-H4K8ac_peak_7362 | 6.60096  | CDK17_ENSG00000059758                                                         |
| 12 | 96795333  | 96795658 | KD2-H4K8ac_peak_7363 | 7.55771  | CDK17_ENSG00000059758                                                         |
| 12 | 97300659  | 97301244 | KD2-H4K8ac_peak_7364 | 14.43704 | NEDD1_ENSG00000139350                                                         |
| 12 | 98885021  | 98885221 | KD2-H4K8ac_peak_7365 | 7.12754  |                                                                               |
| 12 | 98897068  | 98897952 | KD2-H4K8ac_peak_7366 | 8.55271  | RP11-181C3.1_ENSG00000245017                                                  |
| 12 | 98908833  | 98909126 | KD2-H4K8ac_peak_7367 | 10.19949 | TMPO_ENSG00000120802                                                          |
| 12 | 98909469  | 98910242 | KD2-H4K8ac_peak_7368 | 9.57101  | TMPO-AS1_ENSG00000257167;TMPO_ENSG00000120802                                 |
| 12 | 98986916  | 98987134 | KD2-H4K8ac_peak_7369 | 6.2781   | SLC25A3_ENSG00000075415                                                       |
| 12 | 98987528  | 98988086 | KD2-H4K8ac_peak_7370 | 8.4716   | SLC25A3_ENSG00000075415                                                       |
| 12 | 99037873  | 99038731 | KD2-H4K8ac_peak_7371 | 12.26331 | IKBIP_ENSG00000166130;APAF1_ENSG00000120868                                   |
| 12 | 99039083  | 99039508 | KD2-H4K8ac_peak_7372 | 14.45402 | IKBIP_ENSG00000166130;APAF1_ENSG00000120868                                   |
| 12 | 99139283  | 99139607 | KD2-H4K8ac_peak_7373 | 8.5781   |                                                                               |
| 12 | 100536997 | 1.01E+08 | KD2-H4K8ac_peak_7374 | 9.59147  | UHRF1BP1L_ENSG00000111647;RP11-175P13.2_ENSG00000257696                       |
| 12 | 100557163 | 1.01E+08 | KD2-H4K8ac_peak_7375 | 6.37652  |                                                                               |
| 12 | 100592931 | 1.01E+08 | KD2-H4K8ac_peak_7376 | 12.06346 | RP11-175P13.3_ENSG00000257489;ACTR6_ENSG00000075089                           |
| 12 | 100661183 | 1.01E+08 | KD2-H4K8ac_peak_7377 | 9.89126  | DEPDC4_ENSG00000166153;SCYL2_ENSG00000136021                                  |
| 12 | 101801886 | 1.02E+08 | KD2-H4K8ac_peak_7378 | 10.96455 | ARL1_ENSG00000120805;RP11-321F8.4_ENSG00000257543                             |
| 12 | 102091820 | 1.02E+08 | KD2-H4K8ac_peak_7379 | 7.20567  |                                                                               |
| 12 | 102224178 | 1.02E+08 | KD2-H4K8ac_peak_7380 | 10.0692  | GNPTAB_ENSG00000111670                                                        |
| 12 | 102270928 | 1.02E+08 | KD2-H4K8ac_peak_7381 | 22.36554 | DRAM1_ENSG00000136048                                                         |
| 12 | 102455382 | 1.02E+08 | KD2-H4K8ac_peak_7382 | 8.02571  | CCDC53_ENSG00000120860                                                        |
| 12 | 103889487 | 1.04E+08 | KD2-H4K8ac_peak_7383 | 6.83936  | C12orf42_ENSG00000179088                                                      |
| 12 | 103969519 | 1.04E+08 | KD2-H4K8ac_peak_7384 | 6.99815  |                                                                               |
| 12 | 104323019 | 1.04E+08 | KD2-H4K8ac_peak_7385 | 9.1707   | RP11-642P15.1_ENSG00000214198;HSP90B1_ENSG00000166598;MIR3652_ENSG00000265072 |
| 12 | 104324226 | 1.04E+08 | KD2-H4K8ac_peak_7386 | 6.5996   | RP11-642P15.1_ENSG00000214198;HSP90B1_ENSG00000166598;MIR3652_ENSG00000265072 |
| 12 | 104350477 | 1.04E+08 | KD2-H4K8ac_peak_7387 | 7.27716  |                                                                               |
| 12 | 104351179 | 1.04E+08 | KD2-H4K8ac_peak_7388 | 5.88845  |                                                                               |
| 12 | 104359681 | 1.04E+08 | KD2-H4K8ac_peak_7389 | 11.92978 | C12orf73_ENSG00000204954;TDG_ENSG00000139372                                  |
| 12 | 104443670 | 1.04E+08 | KD2-H4K8ac_peak_7390 | 8.53581  |                                                                               |
| 12 | 104531230 | 1.05E+08 | KD2-H4K8ac_peak_7391 | 26.15943 | NFYB_ENSG00000120837                                                          |
| 12 | 104532217 | 1.05E+08 | KD2-H4K8ac_peak_7392 | 15.81711 | NFYB_ENSG00000120837                                                          |
| 12 | 104680802 | 1.05E+08 | KD2-H4K8ac_peak_7393 | 6.30229  |                                                                               |
| 12 | 105038251 | 1.05E+08 | KD2-H4K8ac_peak_7394 | 5.73839  |                                                                               |
| 12 | 105062601 | 1.05E+08 | KD2-H4K8ac_peak_7395 | 13.2669  |                                                                               |
| 12 | 105118331 | 1.05E+08 | KD2-H4K8ac_peak_7396 | 8.87298  |                                                                               |
| 12 | 105351910 | 1.05E+08 | KD2-H4K8ac_peak_7397 | 14.00658 | SLC41A2_ENSG00000136052                                                       |
| 12 | 105352835 | 1.05E+08 | KD2-H4K8ac_peak_7398 | 8.02571  | SLC41A2_ENSG00000136052                                                       |
| 12 | 105500946 | 1.06E+08 | KD2-H4K8ac_peak_7399 | 8.74596  | RP11-61E11.2_ENSG00000257999;KIAA1033_ENSG00000136051                         |
| 12 | 105501606 | 1.06E+08 | KD2-H4K8ac_peak_7400 | 6.25869  | RP11-61E11.2_ENSG00000257999;KIAA1033_ENSG00000136051                         |
| 12 | 105629523 | 1.06E+08 | KD2-H4K8ac_peak_7401 | 15.58442 | APPL2_ENSG00000136044;C12orf75_ENSG00000235162                                |
| 12 | 105630289 | 1.06E+08 | KD2-H4K8ac_peak_7402 | 7.70289  | APPL2_ENSG00000136044                                                         |
| 12 | 105724508 | 1.06E+08 | KD2-H4K8ac_peak_7403 | 12.99417 |                                                                               |
| 12 | 106532284 | 1.07E+08 | KD2-H4K8ac_peak_7404 | 22.07309 | NUAK1_ENSG00000074590                                                         |

|    |           |          |                      |          |                                                     |
|----|-----------|----------|----------------------|----------|-----------------------------------------------------|
| 12 | 106640994 | 1.07E+08 | KD2-H4K8ac_peak_7405 | 9.20193  | RP11-651L5.2_ENSG00000258355                        |
| 12 | 106641458 | 1.07E+08 | KD2-H4K8ac_peak_7406 | 21.6161  | RP11-651L5.2_ENSG00000258355                        |
| 12 | 106751575 | 1.07E+08 | KD2-H4K8ac_peak_7407 | 14.8083  | POLR3B_ENSG00000013503                              |
| 12 | 107167156 | 1.07E+08 | KD2-H4K8ac_peak_7408 | 7.27716  | RIC8B_ENSG00000111785                               |
| 12 | 107168118 | 1.07E+08 | KD2-H4K8ac_peak_7409 | 8.85813  | RP11-144F15.1_ENSG00000257545;RIC8B_ENSG00000111785 |
| 12 | 107523980 | 1.08E+08 | KD2-H4K8ac_peak_7410 | 12.00273 |                                                     |
| 12 | 107525854 | 1.08E+08 | KD2-H4K8ac_peak_7411 | 9.11031  |                                                     |
| 12 | 107533187 | 1.08E+08 | KD2-H4K8ac_peak_7412 | 9.63925  |                                                     |
| 12 | 107764997 | 1.08E+08 | KD2-H4K8ac_peak_7413 | 7.26029  |                                                     |
| 12 | 107766731 | 1.08E+08 | KD2-H4K8ac_peak_7414 | 7.11925  |                                                     |
| 12 | 107767471 | 1.08E+08 | KD2-H4K8ac_peak_7415 | 6.40297  | SNORD74_ENSG00000200897                             |
| 12 | 107796157 | 1.08E+08 | KD2-H4K8ac_peak_7416 | 6.4095   |                                                     |
| 12 | 107800125 | 1.08E+08 | KD2-H4K8ac_peak_7417 | 7.26029  |                                                     |
| 12 | 107900956 | 1.08E+08 | KD2-H4K8ac_peak_7418 | 4.49837  |                                                     |
| 12 | 108001756 | 1.08E+08 | KD2-H4K8ac_peak_7419 | 7.95563  |                                                     |
| 12 | 108039115 | 1.08E+08 | KD2-H4K8ac_peak_7420 | 11.79585 |                                                     |
| 12 | 108040481 | 1.08E+08 | KD2-H4K8ac_peak_7421 | 5.81222  |                                                     |
| 12 | 108048127 | 1.08E+08 | KD2-H4K8ac_peak_7422 | 8.83749  |                                                     |
| 12 | 108048713 | 1.08E+08 | KD2-H4K8ac_peak_7423 | 5.14125  |                                                     |
| 12 | 108049535 | 1.08E+08 | KD2-H4K8ac_peak_7424 | 6.56211  |                                                     |
| 12 | 108079610 | 1.08E+08 | KD2-H4K8ac_peak_7425 | 9.65086  | PWP1_ENSG00000136045                                |
| 12 | 108154441 | 1.08E+08 | KD2-H4K8ac_peak_7426 | 11.92978 | PRDM4_ENSG00000110851                               |
| 12 | 108155259 | 1.08E+08 | KD2-H4K8ac_peak_7427 | 6.76298  | PRDM4_ENSG00000110851                               |
| 12 | 108297313 | 1.08E+08 | KD2-H4K8ac_peak_7428 | 7.47462  | RP11-554D14.2_ENSG00000258072                       |
| 12 | 108485640 | 1.08E+08 | KD2-H4K8ac_peak_7429 | 6.40683  |                                                     |
| 12 | 108692386 | 1.09E+08 | KD2-H4K8ac_peak_7430 | 4.211    |                                                     |
| 12 | 108699500 | 1.09E+08 | KD2-H4K8ac_peak_7431 | 6.56211  |                                                     |
| 12 | 108704454 | 1.09E+08 | KD2-H4K8ac_peak_7432 | 5.75757  |                                                     |
| 12 | 108705395 | 1.09E+08 | KD2-H4K8ac_peak_7433 | 5.9696   |                                                     |
| 12 | 108706104 | 1.09E+08 | KD2-H4K8ac_peak_7434 | 5.61067  |                                                     |
| 12 | 108764493 | 1.09E+08 | KD2-H4K8ac_peak_7435 | 5.54647  |                                                     |
| 12 | 108774924 | 1.09E+08 | KD2-H4K8ac_peak_7436 | 5.10276  |                                                     |
| 12 | 108779269 | 1.09E+08 | KD2-H4K8ac_peak_7437 | 6.14257  |                                                     |
| 12 | 108787562 | 1.09E+08 | KD2-H4K8ac_peak_7438 | 7.79898  |                                                     |
| 12 | 108788217 | 1.09E+08 | KD2-H4K8ac_peak_7439 | 5.54647  |                                                     |
| 12 | 108793494 | 1.09E+08 | KD2-H4K8ac_peak_7440 | 5.15777  |                                                     |
| 12 | 108908538 | 1.09E+08 | KD2-H4K8ac_peak_7441 | 9.06369  | FICD_ENSG00000198855                                |
| 12 | 108954528 | 1.09E+08 | KD2-H4K8ac_peak_7442 | 12.06346 | SART3_ENSG00000075856                               |
| 12 | 108960154 | 1.09E+08 | KD2-H4K8ac_peak_7443 | 4.87807  |                                                     |
| 12 | 108983024 | 1.09E+08 | KD2-H4K8ac_peak_7444 | 5.54647  |                                                     |
| 12 | 108990697 | 1.09E+08 | KD2-H4K8ac_peak_7445 | 7.20567  | TMEM119_ENSG00000183160                             |
| 12 | 108992051 | 1.09E+08 | KD2-H4K8ac_peak_7446 | 5.94405  | TMEM119_ENSG00000183160                             |
| 12 | 109003495 | 1.09E+08 | KD2-H4K8ac_peak_7447 | 4.06758  |                                                     |
| 12 | 109126043 | 1.09E+08 | KD2-H4K8ac_peak_7448 | 14.8083  | CORO1C_ENSG00000110880                              |
| 12 | 109167617 | 1.09E+08 | KD2-H4K8ac_peak_7449 | 7.167    |                                                     |
| 12 | 109220468 | 1.09E+08 | KD2-H4K8ac_peak_7450 | 11.89502 |                                                     |

|    |           |          |                      |          |                                              |
|----|-----------|----------|----------------------|----------|----------------------------------------------|
| 12 | 109233573 | 1.09E+08 | KD2-H4K8ac_peak_7451 | 5.5051   |                                              |
| 12 | 109250815 | 1.09E+08 | KD2-H4K8ac_peak_7452 | 10.08707 | SSH1_ENSG00000084112                         |
| 12 | 109251530 | 1.09E+08 | KD2-H4K8ac_peak_7453 | 19.3524  | SSH1_ENSG00000084112;DAO_ENSG00000110887     |
| 12 | 109489974 | 1.09E+08 | KD2-H4K8ac_peak_7454 | 21.01976 | USP30-AS1_ENSG00000256262                    |
| 12 | 109530370 | 1.1E+08  | KD2-H4K8ac_peak_7455 | 7.01658  | ALKBH2_ENSG00000189046                       |
| 12 | 109548464 | 1.1E+08  | KD2-H4K8ac_peak_7456 | 19.1048  | RP11-968O1.5_ENSG00000256139                 |
| 12 | 109553525 | 1.1E+08  | KD2-H4K8ac_peak_7457 | 7.63551  | ACACB_ENSG00000076555                        |
| 12 | 109728463 | 1.1E+08  | KD2-H4K8ac_peak_7458 | 15.59774 |                                              |
| 12 | 109729718 | 1.1E+08  | KD2-H4K8ac_peak_7459 | 12.08081 |                                              |
| 12 | 109742565 | 1.1E+08  | KD2-H4K8ac_peak_7460 | 5.71749  |                                              |
| 12 | 109746810 | 1.1E+08  | KD2-H4K8ac_peak_7461 | 6.5996   | FOXN4_ENSG00000139445                        |
| 12 | 109747428 | 1.1E+08  | KD2-H4K8ac_peak_7462 | 10.73134 | FOXN4_ENSG00000139445                        |
| 12 | 109915062 | 1.1E+08  | KD2-H4K8ac_peak_7463 | 11.92978 | KCTD10_ENSG00000110906;UBE3B_ENSG00000151148 |
| 12 | 109960025 | 1.1E+08  | KD2-H4K8ac_peak_7464 | 6.84261  |                                              |
| 12 | 109961648 | 1.1E+08  | KD2-H4K8ac_peak_7465 | 5.30799  |                                              |
| 12 | 109967988 | 1.1E+08  | KD2-H4K8ac_peak_7466 | 5.82859  |                                              |
| 12 | 109968576 | 1.1E+08  | KD2-H4K8ac_peak_7467 | 8.33304  |                                              |
| 12 | 109972215 | 1.1E+08  | KD2-H4K8ac_peak_7468 | 6.72624  |                                              |
| 12 | 109978842 | 1.1E+08  | KD2-H4K8ac_peak_7469 | 7.79741  |                                              |
| 12 | 109982874 | 1.1E+08  | KD2-H4K8ac_peak_7470 | 8.74596  |                                              |
| 12 | 110010916 | 1.1E+08  | KD2-H4K8ac_peak_7471 | 16.15695 | MMAB_ENSG00000139428;MVK_ENSG00000110921     |
| 12 | 110028954 | 1.1E+08  | KD2-H4K8ac_peak_7472 | 5.47943  |                                              |
| 12 | 110035886 | 1.1E+08  | KD2-H4K8ac_peak_7473 | 7.38799  |                                              |
| 12 | 110043161 | 1.1E+08  | KD2-H4K8ac_peak_7474 | 7.98621  |                                              |
| 12 | 110043765 | 1.1E+08  | KD2-H4K8ac_peak_7475 | 9.63487  |                                              |
| 12 | 110049556 | 1.1E+08  | KD2-H4K8ac_peak_7476 | 9.1707   |                                              |
| 12 | 110059603 | 1.1E+08  | KD2-H4K8ac_peak_7477 | 7.76329  |                                              |
| 12 | 110060940 | 1.1E+08  | KD2-H4K8ac_peak_7478 | 5.54647  |                                              |
| 12 | 110080693 | 1.1E+08  | KD2-H4K8ac_peak_7479 | 4.01115  |                                              |
| 12 | 110082044 | 1.1E+08  | KD2-H4K8ac_peak_7480 | 5.20908  |                                              |
| 12 | 110083385 | 1.1E+08  | KD2-H4K8ac_peak_7481 | 9.80695  |                                              |
| 12 | 110086269 | 1.1E+08  | KD2-H4K8ac_peak_7482 | 5.82799  |                                              |
| 12 | 110092611 | 1.1E+08  | KD2-H4K8ac_peak_7483 | 9.1707   |                                              |
| 12 | 110093734 | 1.1E+08  | KD2-H4K8ac_peak_7484 | 7.146    |                                              |
| 12 | 110133792 | 1.1E+08  | KD2-H4K8ac_peak_7485 | 5.57044  |                                              |
| 12 | 110138531 | 1.1E+08  | KD2-H4K8ac_peak_7486 | 13.07128 |                                              |
| 12 | 110157829 | 1.1E+08  | KD2-H4K8ac_peak_7487 | 9.18237  |                                              |
| 12 | 110169910 | 1.1E+08  | KD2-H4K8ac_peak_7488 | 7.1181   |                                              |
| 12 | 110175812 | 1.1E+08  | KD2-H4K8ac_peak_7489 | 7.67504  |                                              |
| 12 | 110177828 | 1.1E+08  | KD2-H4K8ac_peak_7490 | 5.56396  |                                              |
| 12 | 110181004 | 1.1E+08  | KD2-H4K8ac_peak_7491 | 3.75035  |                                              |
| 12 | 110181740 | 1.1E+08  | KD2-H4K8ac_peak_7492 | 5.45396  |                                              |
| 12 | 110190667 | 1.1E+08  | KD2-H4K8ac_peak_7493 | 6.66692  |                                              |
| 12 | 110192083 | 1.1E+08  | KD2-H4K8ac_peak_7494 | 4.8402   |                                              |
| 12 | 110196778 | 1.1E+08  | KD2-H4K8ac_peak_7495 | 11.92978 |                                              |
| 12 | 110197770 | 1.1E+08  | KD2-H4K8ac_peak_7496 | 7.40111  |                                              |

|    |           |          |                      |          |                                                     |
|----|-----------|----------|----------------------|----------|-----------------------------------------------------|
| 12 | 110257124 | 1.1E+08  | KD2-H4K8ac_peak_7497 | 5.71749  |                                                     |
| 12 | 110270846 | 1.1E+08  | KD2-H4K8ac_peak_7498 | 10.86378 | TRPV4_ENSG00000111199;MIR4497_ENSG00000263510       |
| 12 | 110337383 | 1.1E+08  | KD2-H4K8ac_peak_7499 | 10.21366 | TCHP_ENSG00000139437                                |
| 12 | 110433716 | 1.1E+08  | KD2-H4K8ac_peak_7500 | 15.22643 | GIT2_ENSG00000139436                                |
| 12 | 110434320 | 1.1E+08  | KD2-H4K8ac_peak_7501 | 11.59946 | GIT2_ENSG00000139436                                |
| 12 | 110436508 | 1.1E+08  | KD2-H4K8ac_peak_7502 | 9.73431  | ANKRD13A_ENSG00000076513                            |
| 12 | 110436943 | 1.1E+08  | KD2-H4K8ac_peak_7503 | 16.57619 | ANKRD13A_ENSG00000076513                            |
| 12 | 110485883 | 1.1E+08  | KD2-H4K8ac_peak_7504 | 7.36799  |                                                     |
| 12 | 110486704 | 1.1E+08  | KD2-H4K8ac_peak_7505 | 10.05606 |                                                     |
| 12 | 110562259 | 1.11E+08 | KD2-H4K8ac_peak_7506 | 9.36516  | IFT81_ENSG00000122970                               |
| 12 | 110707617 | 1.11E+08 | KD2-H4K8ac_peak_7507 | 5.1313   |                                                     |
| 12 | 110718398 | 1.11E+08 | KD2-H4K8ac_peak_7508 | 10.77651 | ATP2A2_ENSG00000174437                              |
| 12 | 110841103 | 1.11E+08 | KD2-H4K8ac_peak_7509 | 6.36375  | ANAPC7_ENSG00000196510                              |
| 12 | 110887745 | 1.11E+08 | KD2-H4K8ac_peak_7510 | 7.28628  | ARPC3_ENSG00000111229                               |
| 12 | 110906424 | 1.11E+08 | KD2-H4K8ac_peak_7511 | 21.2844  | GPN3_ENSG00000111231;FAM216A_ENSG00000204856        |
| 12 | 111020730 | 1.11E+08 | KD2-H4K8ac_peak_7512 | 10.29344 | PPTC7_ENSG00000196850                               |
| 12 | 111051072 | 1.11E+08 | KD2-H4K8ac_peak_7513 | 8.52559  | TCTN1_ENSG00000204852                               |
| 12 | 111116882 | 1.11E+08 | KD2-H4K8ac_peak_7514 | 5.58333  |                                                     |
| 12 | 111126786 | 1.11E+08 | KD2-H4K8ac_peak_7515 | 6.31143  |                                                     |
| 12 | 111131758 | 1.11E+08 | KD2-H4K8ac_peak_7516 | 4.211    |                                                     |
| 12 | 111132292 | 1.11E+08 | KD2-H4K8ac_peak_7517 | 4.98072  |                                                     |
| 12 | 111137196 | 1.11E+08 | KD2-H4K8ac_peak_7518 | 6.35843  |                                                     |
| 12 | 111137660 | 1.11E+08 | KD2-H4K8ac_peak_7519 | 8.02571  |                                                     |
| 12 | 111180460 | 1.11E+08 | KD2-H4K8ac_peak_7520 | 7.47462  | PPP1CC_ENSG00000186298                              |
| 12 | 111298734 | 1.11E+08 | KD2-H4K8ac_peak_7521 | 6.16888  |                                                     |
| 12 | 111394999 | 1.11E+08 | KD2-H4K8ac_peak_7522 | 6.16888  | RP1-46F2.3_ENSG00000258240                          |
| 12 | 111395839 | 1.11E+08 | KD2-H4K8ac_peak_7523 | 6.31143  | RP1-46F2.3_ENSG00000258240                          |
| 12 | 111470697 | 1.11E+08 | KD2-H4K8ac_peak_7524 | 5.9696   | CUX2_ENSG00000111249                                |
| 12 | 111472006 | 1.11E+08 | KD2-H4K8ac_peak_7525 | 13.02811 | CUX2_ENSG00000111249                                |
| 12 | 111494450 | 1.11E+08 | KD2-H4K8ac_peak_7526 | 6.1228   |                                                     |
| 12 | 111616834 | 1.12E+08 | KD2-H4K8ac_peak_7527 | 14.04094 |                                                     |
| 12 | 111618379 | 1.12E+08 | KD2-H4K8ac_peak_7528 | 7.74292  |                                                     |
| 12 | 111623517 | 1.12E+08 | KD2-H4K8ac_peak_7529 | 9.1707   |                                                     |
| 12 | 111623999 | 1.12E+08 | KD2-H4K8ac_peak_7530 | 10.21066 |                                                     |
| 12 | 111646807 | 1.12E+08 | KD2-H4K8ac_peak_7531 | 4.77079  |                                                     |
| 12 | 111649784 | 1.12E+08 | KD2-H4K8ac_peak_7532 | 7.22457  |                                                     |
| 12 | 111662467 | 1.12E+08 | KD2-H4K8ac_peak_7533 | 8.26945  |                                                     |
| 12 | 111685813 | 1.12E+08 | KD2-H4K8ac_peak_7534 | 5.14125  |                                                     |
| 12 | 111806417 | 1.12E+08 | KD2-H4K8ac_peak_7535 | 5.75757  | FAM109A_ENSG00000198324;RP3-473L9.4_ENSG00000257595 |
| 12 | 111842883 | 1.12E+08 | KD2-H4K8ac_peak_7536 | 3.90565  | SH2B3_ENSG00000111252                               |
| 12 | 111844245 | 1.12E+08 | KD2-H4K8ac_peak_7537 | 4.211    | SH2B3_ENSG00000111252                               |
| 12 | 111847821 | 1.12E+08 | KD2-H4K8ac_peak_7538 | 4.211    |                                                     |
| 12 | 111867845 | 1.12E+08 | KD2-H4K8ac_peak_7539 | 8.86391  |                                                     |
| 12 | 112035789 | 1.12E+08 | KD2-H4K8ac_peak_7540 | 6.56926  |                                                     |
| 12 | 112036716 | 1.12E+08 | KD2-H4K8ac_peak_7541 | 12.57865 | ATXN2_ENSG00000204842;RP11-686G8.2_ENSG00000258099  |
| 12 | 112123308 | 1.12E+08 | KD2-H4K8ac_peak_7542 | 9.61895  | BRAP_ENSG00000089234;ACAD10_ENSG00000111271         |



|    |           |          |                      |          |                                                                                  |
|----|-----------|----------|----------------------|----------|----------------------------------------------------------------------------------|
| 12 | 112123950 | 1.12E+08 | KD2-H4K8ac_peak_7543 | 6.99815  | BRAP_ENSG00000089234;ACAD10_ENSG00000111271                                      |
| 12 | 112204387 | 1.12E+08 | KD2-H4K8ac_peak_7544 | 5.94405  | ALDH2_ENSG00000111275                                                            |
| 12 | 112204799 | 1.12E+08 | KD2-H4K8ac_peak_7545 | 5.1707   | ALDH2_ENSG00000111275                                                            |
| 12 | 112279254 | 1.12E+08 | KD2-H4K8ac_peak_7546 | 5.14125  | AC003029.1_ENSG00000248594;MAPKAPK5_ENSG00000089022                              |
| 12 | 112279830 | 1.12E+08 | KD2-H4K8ac_peak_7547 | 9.20193  | MAPKAPK5-AS1_ENSG00000234608;AC003029.1_ENSG00000248594;MAPKAPK5_ENSG00000089022 |
| 12 | 112450092 | 1.12E+08 | KD2-H4K8ac_peak_7548 | 10.19949 | TMEM116_ENSG00000198270;ERP29_ENSG00000089248                                    |
| 12 | 112451321 | 1.12E+08 | KD2-H4K8ac_peak_7549 | 7.90806  | TMEM116_ENSG00000198270;ERP29_ENSG00000089248                                    |
| 12 | 112546080 | 1.13E+08 | KD2-H4K8ac_peak_7550 | 12.84642 | NAA25_ENSG00000111300                                                            |
| 12 | 112554043 | 1.13E+08 | KD2-H4K8ac_peak_7551 | 5.30799  |                                                                                  |
| 12 | 112554656 | 1.13E+08 | KD2-H4K8ac_peak_7552 | 6.0073   |                                                                                  |
| 12 | 112785035 | 1.13E+08 | KD2-H4K8ac_peak_7553 | 5.64449  |                                                                                  |
| 12 | 112820359 | 1.13E+08 | KD2-H4K8ac_peak_7554 | 7.49599  | HECTD4_ENSG00000173064                                                           |
| 12 | 112825422 | 1.13E+08 | KD2-H4K8ac_peak_7555 | 9.15329  |                                                                                  |
| 12 | 112846561 | 1.13E+08 | KD2-H4K8ac_peak_7556 | 13.3695  |                                                                                  |
| 12 | 112856744 | 1.13E+08 | KD2-H4K8ac_peak_7557 | 13.12288 | RPL6_ENSG00000089009;PTPN11_ENSG00000179295                                      |
| 12 | 113242037 | 1.13E+08 | KD2-H4K8ac_peak_7558 | 5.14125  |                                                                                  |
| 12 | 113258402 | 1.13E+08 | KD2-H4K8ac_peak_7559 | 11.5673  |                                                                                  |
| 12 | 113260183 | 1.13E+08 | KD2-H4K8ac_peak_7560 | 12.06346 |                                                                                  |
| 12 | 113273642 | 1.13E+08 | KD2-H4K8ac_peak_7561 | 4.75764  |                                                                                  |
| 12 | 113280377 | 1.13E+08 | KD2-H4K8ac_peak_7562 | 6.4095   |                                                                                  |
| 12 | 113328363 | 1.13E+08 | KD2-H4K8ac_peak_7563 | 11.24422 |                                                                                  |
| 12 | 113330086 | 1.13E+08 | KD2-H4K8ac_peak_7564 | 3.8301   |                                                                                  |
| 12 | 113495012 | 1.13E+08 | KD2-H4K8ac_peak_7565 | 8.5092   | DTX1_ENSG00000135144                                                             |
| 12 | 113622967 | 1.14E+08 | KD2-H4K8ac_peak_7566 | 6.0605   | DDX54_ENSG00000123064;RITA1_ENSG00000139405                                      |
| 12 | 113682354 | 1.14E+08 | KD2-H4K8ac_peak_7567 | 18.88045 |                                                                                  |
| 12 | 113683967 | 1.14E+08 | KD2-H4K8ac_peak_7568 | 9.95119  |                                                                                  |
| 12 | 113698065 | 1.14E+08 | KD2-H4K8ac_peak_7569 | 10.12553 |                                                                                  |
| 12 | 113737276 | 1.14E+08 | KD2-H4K8ac_peak_7570 | 7.70289  |                                                                                  |
| 12 | 113772645 | 1.14E+08 | KD2-H4K8ac_peak_7571 | 10.43145 |                                                                                  |
| 12 | 113795866 | 1.14E+08 | KD2-H4K8ac_peak_7572 | 9.63487  | PLBD2_ENSG00000151176                                                            |
| 12 | 113796442 | 1.14E+08 | KD2-H4K8ac_peak_7573 | 7.69287  | SLC8B1_ENSG00000089060;PLBD2_ENSG00000151176                                     |
| 12 | 114075460 | 1.14E+08 | KD2-H4K8ac_peak_7574 | 6.40683  |                                                                                  |
| 12 | 114203706 | 1.14E+08 | KD2-H4K8ac_peak_7575 | 7.74292  |                                                                                  |
| 12 | 114278528 | 1.14E+08 | KD2-H4K8ac_peak_7576 | 5.14125  |                                                                                  |
| 12 | 115122460 | 1.15E+08 | KD2-H4K8ac_peak_7577 | 5.54647  | TBX3_ENSG00000135111                                                             |
| 12 | 115123070 | 1.15E+08 | KD2-H4K8ac_peak_7578 | 7.01964  |                                                                                  |
| 12 | 115180176 | 1.15E+08 | KD2-H4K8ac_peak_7579 | 3.7063   |                                                                                  |
| 12 | 115307283 | 1.15E+08 | KD2-H4K8ac_peak_7580 | 5.15777  |                                                                                  |
| 12 | 115450254 | 1.15E+08 | KD2-H4K8ac_peak_7581 | 12.26331 |                                                                                  |
| 12 | 115452072 | 1.15E+08 | KD2-H4K8ac_peak_7582 | 6.16888  |                                                                                  |
| 12 | 116715695 | 1.17E+08 | KD2-H4K8ac_peak_7583 | 12.57297 | MED13L_ENSG00000123066                                                           |
| 12 | 116796470 | 1.17E+08 | KD2-H4K8ac_peak_7584 | 9.47671  |                                                                                  |
| 12 | 116803989 | 1.17E+08 | KD2-H4K8ac_peak_7585 | 10.65724 |                                                                                  |
| 12 | 116809882 | 1.17E+08 | KD2-H4K8ac_peak_7586 | 8.66888  |                                                                                  |
| 12 | 116810383 | 1.17E+08 | KD2-H4K8ac_peak_7587 | 9.06703  |                                                                                  |
| 12 | 116811536 | 1.17E+08 | KD2-H4K8ac_peak_7588 | 5.57044  |                                                                                  |

|    |           |          |                      |          |                                                      |
|----|-----------|----------|----------------------|----------|------------------------------------------------------|
| 12 | 117150928 | 1.17E+08 | KD2-H4K8ac_peak_7589 | 6.56926  |                                                      |
| 12 | 117175589 | 1.17E+08 | KD2-H4K8ac_peak_7590 | 11.70505 | C12orf49_ENSG00000111412;RNFT2_ENSG00000135119       |
| 12 | 117256819 | 1.17E+08 | KD2-H4K8ac_peak_7591 | 7.36799  |                                                      |
| 12 | 117259092 | 1.17E+08 | KD2-H4K8ac_peak_7592 | 7.12754  |                                                      |
| 12 | 117299608 | 1.17E+08 | KD2-H4K8ac_peak_7593 | 6.14257  |                                                      |
| 12 | 117319358 | 1.17E+08 | KD2-H4K8ac_peak_7594 | 12.99417 | HRK_ENSG00000135116                                  |
| 12 | 117348527 | 1.17E+08 | KD2-H4K8ac_peak_7595 | 6.25869  | FBXW8_ENSG00000174989                                |
| 12 | 117370237 | 1.17E+08 | KD2-H4K8ac_peak_7596 | 6.66692  |                                                      |
| 12 | 117383209 | 1.17E+08 | KD2-H4K8ac_peak_7597 | 7.67496  |                                                      |
| 12 | 117396627 | 1.17E+08 | KD2-H4K8ac_peak_7598 | 7.47462  |                                                      |
| 12 | 117397306 | 1.17E+08 | KD2-H4K8ac_peak_7599 | 6.00226  |                                                      |
| 12 | 117398467 | 1.17E+08 | KD2-H4K8ac_peak_7600 | 5.58324  |                                                      |
| 12 | 117399933 | 1.17E+08 | KD2-H4K8ac_peak_7601 | 5.405    |                                                      |
| 12 | 117400642 | 1.17E+08 | KD2-H4K8ac_peak_7602 | 7.69287  |                                                      |
| 12 | 117402305 | 1.17E+08 | KD2-H4K8ac_peak_7603 | 8.02571  |                                                      |
| 12 | 117405099 | 1.17E+08 | KD2-H4K8ac_peak_7604 | 4.57371  |                                                      |
| 12 | 117407089 | 1.17E+08 | KD2-H4K8ac_peak_7605 | 8.4939   |                                                      |
| 12 | 117408016 | 1.17E+08 | KD2-H4K8ac_peak_7606 | 8.26945  |                                                      |
| 12 | 117417658 | 1.17E+08 | KD2-H4K8ac_peak_7607 | 8.17902  |                                                      |
| 12 | 117440161 | 1.17E+08 | KD2-H4K8ac_peak_7608 | 5.32137  |                                                      |
| 12 | 117465639 | 1.17E+08 | KD2-H4K8ac_peak_7609 | 6.69204  |                                                      |
| 12 | 117483372 | 1.17E+08 | KD2-H4K8ac_peak_7610 | 13.73635 |                                                      |
| 12 | 117536745 | 1.18E+08 | KD2-H4K8ac_peak_7611 | 19.59051 | TESC_ENSG00000088992;RP11-103B5.2_ENSG00000258285    |
| 12 | 117556666 | 1.18E+08 | KD2-H4K8ac_peak_7612 | 7.40111  |                                                      |
| 12 | 117627778 | 1.18E+08 | KD2-H4K8ac_peak_7613 | 8.5092   | FBXO21_ENSG00000135108                               |
| 12 | 117876845 | 1.18E+08 | KD2-H4K8ac_peak_7614 | 10.20046 |                                                      |
| 12 | 118406839 | 1.18E+08 | KD2-H4K8ac_peak_7615 | 5.54647  | KSR2_ENSG00000171435                                 |
| 12 | 118498374 | 1.18E+08 | KD2-H4K8ac_peak_7616 | 7.67504  |                                                      |
| 12 | 118541095 | 1.19E+08 | KD2-H4K8ac_peak_7617 | 14.80472 |                                                      |
| 12 | 118542022 | 1.19E+08 | KD2-H4K8ac_peak_7618 | 5.88845  |                                                      |
| 12 | 118573971 | 1.19E+08 | KD2-H4K8ac_peak_7619 | 7.96322  | VSIG10_ENSG00000176834;PEBP1_ENSG00000089220         |
| 12 | 118619769 | 1.19E+08 | KD2-H4K8ac_peak_7620 | 5.25071  |                                                      |
| 12 | 118627617 | 1.19E+08 | KD2-H4K8ac_peak_7621 | 4.54006  |                                                      |
| 12 | 118769703 | 1.19E+08 | KD2-H4K8ac_peak_7622 | 6.16888  |                                                      |
| 12 | 118813955 | 1.19E+08 | KD2-H4K8ac_peak_7623 | 13.88933 | RP11-131L12.2_ENSG00000270482;SUFS3_ENSG00000111707  |
| 12 | 119177727 | 1.19E+08 | KD2-H4K8ac_peak_7624 | 6.66692  |                                                      |
| 12 | 119199847 | 1.19E+08 | KD2-H4K8ac_peak_7625 | 6.40683  | RP11-3L23.2_ENSG00000256750                          |
| 12 | 119212012 | 1.19E+08 | KD2-H4K8ac_peak_7626 | 7.22457  | RP11-357K6.1_ENSG00000255618                         |
| 12 | 119443989 | 1.19E+08 | KD2-H4K8ac_peak_7627 | 4.01115  |                                                      |
| 12 | 119613955 | 1.2E+08  | KD2-H4K8ac_peak_7628 | 6.94954  | RP11-64B16.3_ENSG00000256884                         |
| 12 | 119616730 | 1.2E+08  | KD2-H4K8ac_peak_7629 | 4.54037  | HSPB8_ENSG00000152137                                |
| 12 | 119726938 | 1.2E+08  | KD2-H4K8ac_peak_7630 | 9.11031  |                                                      |
| 12 | 120105101 | 1.2E+08  | KD2-H4K8ac_peak_7631 | 9.89126  | RP11-768F21.1_ENSG00000248636;PRKAB1_ENSG00000111725 |
| 12 | 120105770 | 1.2E+08  | KD2-H4K8ac_peak_7632 | 12.08081 | RP11-768F21.1_ENSG00000248636;PRKAB1_ENSG00000111725 |
| 12 | 120314716 | 1.2E+08  | KD2-H4K8ac_peak_7633 | 13.56967 | CIT_ENSG00000122966                                  |
| 12 | 120315305 | 1.2E+08  | KD2-H4K8ac_peak_7634 | 11.05467 | CIT_ENSG00000122966                                  |

|    |           |          |                      |          |                                                     |
|----|-----------|----------|----------------------|----------|-----------------------------------------------------|
| 12 | 120531295 | 1.21E+08 | KD2-H4K8ac_peak_7635 | 9.34989  |                                                     |
| 12 | 120553871 | 1.21E+08 | KD2-H4K8ac_peak_7636 | 5.51783  | RAB35_ENSG00000111737                               |
| 12 | 120554820 | 1.21E+08 | KD2-H4K8ac_peak_7637 | 5.54647  | RAB35_ENSG00000111737                               |
| 12 | 120632201 | 1.21E+08 | KD2-H4K8ac_peak_7638 | 14.63726 | GCN1L1_ENSG00000089154                              |
| 12 | 120662557 | 1.21E+08 | KD2-H4K8ac_peak_7639 | 11.50346 |                                                     |
| 12 | 120672994 | 1.21E+08 | KD2-H4K8ac_peak_7640 | 5.20908  |                                                     |
| 12 | 120730031 | 1.21E+08 | KD2-H4K8ac_peak_7641 | 5.13615  | RNU4-2_ENSG00000202538;RNU4-1_ENSG00000200795       |
| 12 | 120731130 | 1.21E+08 | KD2-H4K8ac_peak_7642 | 7.48133  | RNU4-1_ENSG00000200795                              |
| 12 | 120754976 | 1.21E+08 | KD2-H4K8ac_peak_7643 | 7.45501  |                                                     |
| 12 | 120799035 | 1.21E+08 | KD2-H4K8ac_peak_7644 | 17.88027 |                                                     |
| 12 | 120801164 | 1.21E+08 | KD2-H4K8ac_peak_7645 | 12.60538 |                                                     |
| 12 | 120805797 | 1.21E+08 | KD2-H4K8ac_peak_7646 | 16.15695 | MSI1_ENSG00000135097;RPS27P25_ENSG00000239881       |
| 12 | 120807185 | 1.21E+08 | KD2-H4K8ac_peak_7647 | 10.19949 | MSI1_ENSG00000135097;RPS27P25_ENSG00000239881       |
| 12 | 120884313 | 1.21E+08 | KD2-H4K8ac_peak_7648 | 12.00273 | TRIAPI1_ENSG00000170855;GATC_ENSG00000257218        |
| 12 | 120906767 | 1.21E+08 | KD2-H4K8ac_peak_7649 | 9.90914  | SRSF9_ENSG00000111786;DYNLL1_ENSG00000088986        |
| 12 | 120907191 | 1.21E+08 | KD2-H4K8ac_peak_7650 | 9.63487  | SRSF9_ENSG00000111786;DYNLL1_ENSG00000088986        |
| 12 | 120907739 | 1.21E+08 | KD2-H4K8ac_peak_7651 | 6.67092  | SRSF9_ENSG00000111786;DYNLL1_ENSG00000088986        |
| 12 | 121022407 | 1.21E+08 | KD2-H4K8ac_peak_7652 | 14.84212 |                                                     |
| 12 | 121086744 | 1.21E+08 | KD2-H4K8ac_peak_7653 | 12.42761 |                                                     |
| 12 | 121107270 | 1.21E+08 | KD2-H4K8ac_peak_7654 | 5.63633  |                                                     |
| 12 | 121124330 | 1.21E+08 | KD2-H4K8ac_peak_7655 | 16.8435  | MLEC_ENSG00000110917                                |
| 12 | 121146434 | 1.21E+08 | KD2-H4K8ac_peak_7656 | 7.59643  |                                                     |
| 12 | 121147492 | 1.21E+08 | KD2-H4K8ac_peak_7657 | 5.9696   | UNC119B_ENSG00000175970                             |
| 12 | 121163670 | 1.21E+08 | KD2-H4K8ac_peak_7658 | 12.82393 | ACADS_ENSG00000122971                               |
| 12 | 121341696 | 1.21E+08 | KD2-H4K8ac_peak_7659 | 16.73922 | SPPL3_ENSG00000157837                               |
| 12 | 121453711 | 1.21E+08 | KD2-H4K8ac_peak_7660 | 11.50346 | C12orf43_ENSG00000157895                            |
| 12 | 121570822 | 1.22E+08 | KD2-H4K8ac_peak_7661 | 9.36516  | P2RX7_ENSG00000089041                               |
| 12 | 121647031 | 1.22E+08 | KD2-H4K8ac_peak_7662 | 11.2938  | P2RX4_ENSG00000135124                               |
| 12 | 121647688 | 1.22E+08 | KD2-H4K8ac_peak_7663 | 17.83665 | P2RX4_ENSG00000135124                               |
| 12 | 121734761 | 1.22E+08 | KD2-H4K8ac_peak_7664 | 9.63487  | CAMKK2_ENSG00000110931                              |
| 12 | 121789794 | 1.22E+08 | KD2-H4K8ac_peak_7665 | 7.96322  |                                                     |
| 12 | 121829209 | 1.22E+08 | KD2-H4K8ac_peak_7666 | 4.211    | RP11-711D18.2_ENSG00000258435                       |
| 12 | 121837396 | 1.22E+08 | KD2-H4K8ac_peak_7667 | 7.90806  | ANAPC5_ENSG00000089053;RNF34_ENSG00000170633        |
| 12 | 121838004 | 1.22E+08 | KD2-H4K8ac_peak_7668 | 12.11734 | ANAPC5_ENSG00000089053;RNF34_ENSG00000170633        |
| 12 | 121904720 | 1.22E+08 | KD2-H4K8ac_peak_7669 | 6.56211  |                                                     |
| 12 | 121905524 | 1.22E+08 | KD2-H4K8ac_peak_7670 | 9.78882  |                                                     |
| 12 | 121975773 | 1.22E+08 | KD2-H4K8ac_peak_7671 | 4.67342  |                                                     |
| 12 | 122018667 | 1.22E+08 | KD2-H4K8ac_peak_7672 | 8.17902  | KDM2B_ENSG00000089094;RP13-941N14.1_ENSG00000256742 |
| 12 | 122020404 | 1.22E+08 | KD2-H4K8ac_peak_7673 | 10.68173 |                                                     |
| 12 | 122027826 | 1.22E+08 | KD2-H4K8ac_peak_7674 | 15.7388  |                                                     |
| 12 | 122063991 | 1.22E+08 | KD2-H4K8ac_peak_7675 | 8.58725  | ORAI1_ENSG00000182500                               |
| 12 | 122064986 | 1.22E+08 | KD2-H4K8ac_peak_7676 | 4.67342  | ORAI1_ENSG00000182500                               |
| 12 | 122096766 | 1.22E+08 | KD2-H4K8ac_peak_7677 | 7.96194  |                                                     |
| 12 | 122101854 | 1.22E+08 | KD2-H4K8ac_peak_7678 | 4.42765  |                                                     |
| 12 | 122110221 | 1.22E+08 | KD2-H4K8ac_peak_7679 | 18.47652 | MORN3_ENSG00000139714                               |
| 12 | 122119714 | 1.22E+08 | KD2-H4K8ac_peak_7680 | 8.26945  |                                                     |

|    |           |          |                      |          |                                                                        |
|----|-----------|----------|----------------------|----------|------------------------------------------------------------------------|
| 12 | 122125195 | 1.22E+08 | KD2-H4K8ac_peak_7681 | 15.99047 |                                                                        |
| 12 | 122204931 | 1.22E+08 | KD2-H4K8ac_peak_7682 | 4.26235  |                                                                        |
| 12 | 122214268 | 1.22E+08 | KD2-H4K8ac_peak_7683 | 7.52168  |                                                                        |
| 12 | 122231385 | 1.22E+08 | KD2-H4K8ac_peak_7684 | 10.43145 |                                                                        |
| 12 | 122234378 | 1.22E+08 | KD2-H4K8ac_peak_7685 | 6.05809  | RP11-347I19.8_ENSG00000272849                                          |
| 12 | 122235403 | 1.22E+08 | KD2-H4K8ac_peak_7686 | 7.96322  | RP11-347I19.8_ENSG00000272849                                          |
| 12 | 122236934 | 1.22E+08 | KD2-H4K8ac_peak_7687 | 5.405    |                                                                        |
| 12 | 122237724 | 1.22E+08 | KD2-H4K8ac_peak_7688 | 30.35433 |                                                                        |
| 12 | 122241318 | 1.22E+08 | KD2-H4K8ac_peak_7689 | 15.61313 | SETD1B_ENSG00000139718;RHOF_ENSG00000139725;AC084018.1_ENSG00000212694 |
| 12 | 122277043 | 1.22E+08 | KD2-H4K8ac_peak_7690 | 15.039   |                                                                        |
| 12 | 122311105 | 1.22E+08 | KD2-H4K8ac_peak_7691 | 6.40297  |                                                                        |
| 12 | 122459328 | 1.22E+08 | KD2-H4K8ac_peak_7692 | 10.0692  |                                                                        |
| 12 | 122460269 | 1.22E+08 | KD2-H4K8ac_peak_7693 | 7.52168  |                                                                        |
| 12 | 122461018 | 1.22E+08 | KD2-H4K8ac_peak_7694 | 4.37815  |                                                                        |
| 12 | 122501625 | 1.23E+08 | KD2-H4K8ac_peak_7695 | 9.16531  | AC156455.1_ENSG00000256546                                             |
| 12 | 122502299 | 1.23E+08 | KD2-H4K8ac_peak_7696 | 6.99815  |                                                                        |
| 12 | 122516055 | 1.23E+08 | KD2-H4K8ac_peak_7697 | 10.96455 | MLXIP_ENSG00000175727                                                  |
| 12 | 122516773 | 1.23E+08 | KD2-H4K8ac_peak_7698 | 9.96798  | MLXIP_ENSG00000175727                                                  |
| 12 | 122667621 | 1.23E+08 | KD2-H4K8ac_peak_7699 | 16.64426 |                                                                        |
| 12 | 122685959 | 1.23E+08 | KD2-H4K8ac_peak_7700 | 8.52559  |                                                                        |
| 12 | 122687762 | 1.23E+08 | KD2-H4K8ac_peak_7701 | 8.10216  | B3GNT4_ENSG00000176383                                                 |
| 12 | 122688366 | 1.23E+08 | KD2-H4K8ac_peak_7702 | 13.80019 | B3GNT4_ENSG00000176383                                                 |
| 12 | 122710018 | 1.23E+08 | KD2-H4K8ac_peak_7703 | 5.92591  |                                                                        |
| 12 | 122712130 | 1.23E+08 | KD2-H4K8ac_peak_7704 | 10.21366 | DIABLO_ENSG00000184047                                                 |
| 12 | 122713258 | 1.23E+08 | KD2-H4K8ac_peak_7705 | 8.26945  |                                                                        |
| 12 | 122714365 | 1.23E+08 | KD2-H4K8ac_peak_7706 | 8.42997  |                                                                        |
| 12 | 122715295 | 1.23E+08 | KD2-H4K8ac_peak_7707 | 7.54952  |                                                                        |
| 12 | 122750603 | 1.23E+08 | KD2-H4K8ac_peak_7708 | 10.66719 | RP11-512M8.5_ENSG00000256861;VPS33A_ENSG00000139719                    |
| 12 | 122840267 | 1.23E+08 | KD2-H4K8ac_peak_7709 | 8.00457  |                                                                        |
| 12 | 122906529 | 1.23E+08 | KD2-H4K8ac_peak_7710 | 18.37277 | CLIP1_ENSG00000130779                                                  |
| 12 | 122907453 | 1.23E+08 | KD2-H4K8ac_peak_7711 | 11.86082 | CLIP1_ENSG00000130779                                                  |
| 12 | 123011872 | 1.23E+08 | KD2-H4K8ac_peak_7712 | 10.65724 | RSRC2_ENSG00000111011;KNTC1_ENSG00000184445                            |
| 12 | 123237440 | 1.23E+08 | KD2-H4K8ac_peak_7713 | 8.47116  | DENR_ENSG00000139726                                                   |
| 12 | 123259054 | 1.23E+08 | KD2-H4K8ac_peak_7714 | 9.89126  | CCDC62_ENSG00000130783                                                 |
| 12 | 123318598 | 1.23E+08 | KD2-H4K8ac_peak_7715 | 7.47462  | HIP1R_ENSG00000130787                                                  |
| 12 | 123338111 | 1.23E+08 | KD2-H4K8ac_peak_7716 | 7.47462  |                                                                        |
| 12 | 123346892 | 1.23E+08 | KD2-H4K8ac_peak_7717 | 6.15357  |                                                                        |
| 12 | 123458704 | 1.23E+08 | KD2-H4K8ac_peak_7718 | 6.51023  | OGFOD2_ENSG00000111325;RP11-197N18.2_ENSG00000256028                   |
| 12 | 123459325 | 1.23E+08 | KD2-H4K8ac_peak_7719 | 20.88898 | OGFOD2_ENSG00000111325;RP11-197N18.2_ENSG00000256028                   |
| 12 | 123464246 | 1.23E+08 | KD2-H4K8ac_peak_7720 | 16.8435  | ABCY9_ENSG00000150967;ARL6IP4_ENSG00000182196                          |
| 12 | 123634834 | 1.24E+08 | KD2-H4K8ac_peak_7721 | 7.81657  | PITPNM2_ENSG00000090975                                                |
| 12 | 123717434 | 1.24E+08 | KD2-H4K8ac_peak_7722 | 13.48341 | C12orf65_ENSG00000130921                                               |
| 12 | 123752504 | 1.24E+08 | KD2-H4K8ac_peak_7723 | 4.37809  |                                                                        |
| 12 | 123752934 | 1.24E+08 | KD2-H4K8ac_peak_7724 | 10.05606 |                                                                        |
| 12 | 123753889 | 1.24E+08 | KD2-H4K8ac_peak_7725 | 6.66359  |                                                                        |
| 12 | 123754398 | 1.24E+08 | KD2-H4K8ac_peak_7726 | 17.42905 | CDK2AP1_ENSG00000111328                                                |

|    |           |          |                      |          |                                                                                                     |
|----|-----------|----------|----------------------|----------|-----------------------------------------------------------------------------------------------------|
| 12 | 123756400 | 1.24E+08 | KD2-H4K8ac_peak_7727 | 16.12525 | CDK2AP1_ENSG00000111328                                                                             |
| 12 | 123848969 | 1.24E+08 | KD2-H4K8ac_peak_7728 | 8.62078  | SBNO1_ENSG00000139697;hsa-mir-8072_ENSG00000256092                                                  |
| 12 | 123867887 | 1.24E+08 | KD2-H4K8ac_peak_7729 | 15.52424 | SETD8_ENSG00000183955                                                                               |
| 12 | 123874095 | 1.24E+08 | KD2-H4K8ac_peak_7730 | 4.77079  |                                                                                                     |
| 12 | 123920619 | 1.24E+08 | KD2-H4K8ac_peak_7731 | 6.99815  | RILPL2_ENSG00000150977                                                                              |
| 12 | 123942677 | 1.24E+08 | KD2-H4K8ac_peak_7732 | 16.04168 | SNRNP35_ENSG00000184209                                                                             |
| 12 | 123943259 | 1.24E+08 | KD2-H4K8ac_peak_7733 | 8.30974  |                                                                                                     |
| 12 | 123953975 | 1.24E+08 | KD2-H4K8ac_peak_7734 | 4.77079  |                                                                                                     |
| 12 | 124017613 | 1.24E+08 | KD2-H4K8ac_peak_7735 | 5.88845  | RILPL1_ENSG00000188026                                                                              |
| 12 | 124018331 | 1.24E+08 | KD2-H4K8ac_peak_7736 | 18.5703  | RILPL1_ENSG00000188026                                                                              |
| 12 | 124055326 | 1.24E+08 | KD2-H4K8ac_peak_7737 | 8.97719  |                                                                                                     |
| 12 | 124068392 | 1.24E+08 | KD2-H4K8ac_peak_7738 | 5.08628  | TMED2_ENSG00000086598                                                                               |
| 12 | 124086045 | 1.24E+08 | KD2-H4K8ac_peak_7739 | 19.35989 | DDX55_ENSG00000111364                                                                               |
| 12 | 124117966 | 1.24E+08 | KD2-H4K8ac_peak_7740 | 4.98072  | EIF2B1_ENSG00000111361;GTF2H3_ENSG00000111358                                                       |
| 12 | 124196191 | 1.24E+08 | KD2-H4K8ac_peak_7741 | 4.06758  | ATP6V0A2_ENSG00000185344                                                                            |
| 12 | 124196958 | 1.24E+08 | KD2-H4K8ac_peak_7742 | 12.00194 | ATP6V0A2_ENSG00000185344                                                                            |
| 12 | 124229153 | 1.24E+08 | KD2-H4K8ac_peak_7743 | 5.07241  |                                                                                                     |
| 12 | 124456618 | 1.24E+08 | KD2-H4K8ac_peak_7744 | 15.25814 | CCDC92_ENSG00000119242;RP11-214K3.18_ENSG00000270095;ZNF664_ENSG00000179195;FAM101A_ENSG00000178882 |
| 12 | 124457787 | 1.24E+08 | KD2-H4K8ac_peak_7745 | 9.96798  | CCDC92_ENSG00000119242;FAM101A_ENSG00000178882                                                      |
| 12 | 124505670 | 1.25E+08 | KD2-H4K8ac_peak_7746 | 5.77029  |                                                                                                     |
| 12 | 124534506 | 1.25E+08 | KD2-H4K8ac_peak_7747 | 4.77079  |                                                                                                     |
| 12 | 124773902 | 1.25E+08 | KD2-H4K8ac_peak_7748 | 6.65673  |                                                                                                     |
| 12 | 124779426 | 1.25E+08 | KD2-H4K8ac_peak_7749 | 6.25869  |                                                                                                     |
| 12 | 124854270 | 1.25E+08 | KD2-H4K8ac_peak_7750 | 7.36799  |                                                                                                     |
| 12 | 124872747 | 1.25E+08 | KD2-H4K8ac_peak_7751 | 9.58924  |                                                                                                     |
| 12 | 124873530 | 1.25E+08 | KD2-H4K8ac_peak_7752 | 11.60333 |                                                                                                     |
| 12 | 124877063 | 1.25E+08 | KD2-H4K8ac_peak_7753 | 7.28827  |                                                                                                     |
| 12 | 124881053 | 1.25E+08 | KD2-H4K8ac_peak_7754 | 8.79106  |                                                                                                     |
| 12 | 124895934 | 1.25E+08 | KD2-H4K8ac_peak_7755 | 7.07117  |                                                                                                     |
| 12 | 124897073 | 1.25E+08 | KD2-H4K8ac_peak_7756 | 6.67474  |                                                                                                     |
| 12 | 124906641 | 1.25E+08 | KD2-H4K8ac_peak_7757 | 7.76104  |                                                                                                     |
| 12 | 124911563 | 1.25E+08 | KD2-H4K8ac_peak_7758 | 12.66465 |                                                                                                     |
| 12 | 124913452 | 1.25E+08 | KD2-H4K8ac_peak_7759 | 11.50346 |                                                                                                     |
| 12 | 124947889 | 1.25E+08 | KD2-H4K8ac_peak_7760 | 7.27716  |                                                                                                     |
| 12 | 124989748 | 1.25E+08 | KD2-H4K8ac_peak_7761 | 13.50024 |                                                                                                     |
| 12 | 124990355 | 1.25E+08 | KD2-H4K8ac_peak_7762 | 13.61173 |                                                                                                     |
| 12 | 124991377 | 1.25E+08 | KD2-H4K8ac_peak_7763 | 7.28628  |                                                                                                     |
| 12 | 124991921 | 1.25E+08 | KD2-H4K8ac_peak_7764 | 17.08129 |                                                                                                     |
| 12 | 124992886 | 1.25E+08 | KD2-H4K8ac_peak_7765 | 5.88457  |                                                                                                     |
| 12 | 124994613 | 1.25E+08 | KD2-H4K8ac_peak_7766 | 11.28765 |                                                                                                     |
| 12 | 124997543 | 1.25E+08 | KD2-H4K8ac_peak_7767 | 5.54647  | RP11-83B20.1_ENSG00000214650                                                                        |
| 12 | 125002162 | 1.25E+08 | KD2-H4K8ac_peak_7768 | 6.66359  |                                                                                                     |
| 12 | 125002837 | 1.25E+08 | KD2-H4K8ac_peak_7769 | 12.53053 |                                                                                                     |
| 12 | 125009067 | 1.25E+08 | KD2-H4K8ac_peak_7770 | 4.95193  |                                                                                                     |
| 12 | 125016123 | 1.25E+08 | KD2-H4K8ac_peak_7771 | 6.56211  |                                                                                                     |
| 12 | 125017135 | 1.25E+08 | KD2-H4K8ac_peak_7772 | 6.66692  |                                                                                                     |

|    |           |          |                      |          |                               |
|----|-----------|----------|----------------------|----------|-------------------------------|
| 12 | 125027900 | 1.25E+08 | KD2-H4K8ac_peak_7773 | 10.5847  |                               |
| 12 | 125029583 | 1.25E+08 | KD2-H4K8ac_peak_7774 | 6.60096  |                               |
| 12 | 125051308 | 1.25E+08 | KD2-H4K8ac_peak_7775 | 12.60538 | NCOR2_ENSG00000196498         |
| 12 | 125052380 | 1.25E+08 | KD2-H4K8ac_peak_7776 | 4.67342  | NCOR2_ENSG00000196498         |
| 12 | 125053363 | 1.25E+08 | KD2-H4K8ac_peak_7777 | 10.46874 |                               |
| 12 | 125087605 | 1.25E+08 | KD2-H4K8ac_peak_7778 | 6.0605   |                               |
| 12 | 125089322 | 1.25E+08 | KD2-H4K8ac_peak_7779 | 10.19723 |                               |
| 12 | 125102266 | 1.25E+08 | KD2-H4K8ac_peak_7780 | 9.80315  |                               |
| 12 | 125117122 | 1.25E+08 | KD2-H4K8ac_peak_7781 | 5.51783  |                               |
| 12 | 125136534 | 1.25E+08 | KD2-H4K8ac_peak_7782 | 7.35057  |                               |
| 12 | 125139194 | 1.25E+08 | KD2-H4K8ac_peak_7783 | 9.57101  |                               |
| 12 | 125140036 | 1.25E+08 | KD2-H4K8ac_peak_7784 | 12.79505 |                               |
| 12 | 125145392 | 1.25E+08 | KD2-H4K8ac_peak_7785 | 8.59301  |                               |
| 12 | 125145843 | 1.25E+08 | KD2-H4K8ac_peak_7786 | 7.95563  |                               |
| 12 | 125160180 | 1.25E+08 | KD2-H4K8ac_peak_7787 | 4.37815  |                               |
| 12 | 125166139 | 1.25E+08 | KD2-H4K8ac_peak_7788 | 5.9696   |                               |
| 12 | 125169258 | 1.25E+08 | KD2-H4K8ac_peak_7789 | 7.28577  |                               |
| 12 | 125198717 | 1.25E+08 | KD2-H4K8ac_peak_7790 | 5.88845  |                               |
| 12 | 125199787 | 1.25E+08 | KD2-H4K8ac_peak_7791 | 11.90517 |                               |
| 12 | 125204567 | 1.25E+08 | KD2-H4K8ac_peak_7792 | 7.96322  |                               |
| 12 | 125226732 | 1.25E+08 | KD2-H4K8ac_peak_7793 | 10.50156 |                               |
| 12 | 125230270 | 1.25E+08 | KD2-H4K8ac_peak_7794 | 15.23486 |                               |
| 12 | 125239706 | 1.25E+08 | KD2-H4K8ac_peak_7795 | 5.37864  |                               |
| 12 | 125271684 | 1.25E+08 | KD2-H4K8ac_peak_7796 | 4.98072  |                               |
| 12 | 125318487 | 1.25E+08 | KD2-H4K8ac_peak_7797 | 5.9696   |                               |
| 12 | 125326194 | 1.25E+08 | KD2-H4K8ac_peak_7798 | 5.75757  |                               |
| 12 | 125348629 | 1.25E+08 | KD2-H4K8ac_peak_7799 | 18.37277 |                               |
| 12 | 125383220 | 1.25E+08 | KD2-H4K8ac_peak_7800 | 6.10699  |                               |
| 12 | 125398821 | 1.25E+08 | KD2-H4K8ac_peak_7801 | 11.70505 | MIR5188_ENSG00000265345       |
| 12 | 125425877 | 1.25E+08 | KD2-H4K8ac_peak_7802 | 3.91903  |                               |
| 12 | 125473368 | 1.25E+08 | KD2-H4K8ac_peak_7803 | 9.89126  | DHX37_ENSG00000150990         |
| 12 | 125478261 | 1.25E+08 | KD2-H4K8ac_peak_7804 | 7.67504  | BRI3BP_ENSG00000184992        |
| 12 | 125534717 | 1.26E+08 | KD2-H4K8ac_peak_7805 | 9.89126  |                               |
| 12 | 125549670 | 1.26E+08 | KD2-H4K8ac_peak_7806 | 6.65673  | AACS_ENSG00000081760          |
| 12 | 127630910 | 1.28E+08 | KD2-H4K8ac_peak_7807 | 5.9696   | RP11-575F12.2_ENSG00000256001 |
| 12 | 129307796 | 1.29E+08 | KD2-H4K8ac_peak_7808 | 8.26945  | SLC15A4_ENSG00000139370       |
| 12 | 129308722 | 1.29E+08 | KD2-H4K8ac_peak_7809 | 8.53092  | SLC15A4_ENSG00000139370       |
| 12 | 130554833 | 1.31E+08 | KD2-H4K8ac_peak_7810 | 6.40683  | RP11-474D1.2_ENSG00000256906  |
| 12 | 130822390 | 1.31E+08 | KD2-H4K8ac_peak_7811 | 14.81929 | PIWIL1_ENSG00000125207        |
| 12 | 130874917 | 1.31E+08 | KD2-H4K8ac_peak_7812 | 16.8435  |                               |
| 12 | 130910296 | 1.31E+08 | KD2-H4K8ac_peak_7813 | 3.91903  |                               |
| 12 | 130947740 | 1.31E+08 | KD2-H4K8ac_peak_7814 | 6.03202  |                               |
| 12 | 131041658 | 1.31E+08 | KD2-H4K8ac_peak_7815 | 4.52514  |                               |
| 12 | 131056255 | 1.31E+08 | KD2-H4K8ac_peak_7816 | 11.89502 |                               |
| 12 | 131061099 | 1.31E+08 | KD2-H4K8ac_peak_7817 | 10.96455 |                               |
| 12 | 131070212 | 1.31E+08 | KD2-H4K8ac_peak_7818 | 7.79898  |                               |

|    |           |          |                      |          |                                                                         |
|----|-----------|----------|----------------------|----------|-------------------------------------------------------------------------|
| 12 | 131097849 | 1.31E+08 | KD2-H4K8ac_peak_7819 | 6.80488  |                                                                         |
| 12 | 131102858 | 1.31E+08 | KD2-H4K8ac_peak_7820 | 6.25869  |                                                                         |
| 12 | 131104612 | 1.31E+08 | KD2-H4K8ac_peak_7821 | 16.822   |                                                                         |
| 12 | 131106027 | 1.31E+08 | KD2-H4K8ac_peak_7822 | 11.92978 |                                                                         |
| 12 | 131107055 | 1.31E+08 | KD2-H4K8ac_peak_7823 | 7.42204  |                                                                         |
| 12 | 131117958 | 1.31E+08 | KD2-H4K8ac_peak_7824 | 3.90565  |                                                                         |
| 12 | 131118764 | 1.31E+08 | KD2-H4K8ac_peak_7825 | 9.23578  |                                                                         |
| 12 | 131170500 | 1.31E+08 | KD2-H4K8ac_peak_7826 | 7.95563  |                                                                         |
| 12 | 131198906 | 1.31E+08 | KD2-H4K8ac_peak_7827 | 7.76329  |                                                                         |
| 12 | 131200309 | 1.31E+08 | KD2-H4K8ac_peak_7828 | 8.30974  | RIMBP2_ENSG00000060709;RP11-662M24.2_ENSG00000256725                    |
| 12 | 131201149 | 1.31E+08 | KD2-H4K8ac_peak_7829 | 12.74183 | RIMBP2_ENSG00000060709;RP11-662M24.2_ENSG00000256725                    |
| 12 | 131214160 | 1.31E+08 | KD2-H4K8ac_peak_7830 | 9.59147  |                                                                         |
| 12 | 131232047 | 1.31E+08 | KD2-H4K8ac_peak_7831 | 7.22936  |                                                                         |
| 12 | 131238898 | 1.31E+08 | KD2-H4K8ac_peak_7832 | 5.71749  |                                                                         |
| 12 | 131356000 | 1.31E+08 | KD2-H4K8ac_peak_7833 | 9.41619  | RAN_ENSG00000132341                                                     |
| 12 | 131356825 | 1.31E+08 | KD2-H4K8ac_peak_7834 | 19.35989 | RAN_ENSG00000132341                                                     |
| 12 | 131436245 | 1.31E+08 | KD2-H4K8ac_peak_7835 | 5.13615  |                                                                         |
| 12 | 131438496 | 1.31E+08 | KD2-H4K8ac_peak_7836 | 7.42204  | GPR133_ENSG00000111452                                                  |
| 12 | 131589490 | 1.32E+08 | KD2-H4K8ac_peak_7837 | 6.25869  |                                                                         |
| 12 | 131853049 | 1.32E+08 | KD2-H4K8ac_peak_7838 | 6.99815  |                                                                         |
| 12 | 132108951 | 1.32E+08 | KD2-H4K8ac_peak_7839 | 5.45396  |                                                                         |
| 12 | 132126406 | 1.32E+08 | KD2-H4K8ac_peak_7840 | 6.36319  |                                                                         |
| 12 | 132194881 | 1.32E+08 | KD2-H4K8ac_peak_7841 | 11.09936 | SFSWAP_ENSG00000061936                                                  |
| 12 | 132280054 | 1.32E+08 | KD2-H4K8ac_peak_7842 | 4.01115  |                                                                         |
| 12 | 132345251 | 1.32E+08 | KD2-H4K8ac_peak_7843 | 18.94636 |                                                                         |
| 12 | 132348062 | 1.32E+08 | KD2-H4K8ac_peak_7844 | 9.1707   |                                                                         |
| 12 | 132348628 | 1.32E+08 | KD2-H4K8ac_peak_7845 | 6.66692  |                                                                         |
| 12 | 132352781 | 1.32E+08 | KD2-H4K8ac_peak_7846 | 4.211    |                                                                         |
| 12 | 132397419 | 1.32E+08 | KD2-H4K8ac_peak_7847 | 12.57143 |                                                                         |
| 12 | 132413095 | 1.32E+08 | KD2-H4K8ac_peak_7848 | 8.4716   | RP11-417L19.4_ENSG00000255992;PUS1_ENSG00000177192                      |
| 12 | 132413840 | 1.32E+08 | KD2-H4K8ac_peak_7849 | 7.76329  | RP11-417L19.4_ENSG00000255992;PUS1_ENSG00000177192                      |
| 12 | 132434531 | 1.32E+08 | KD2-H4K8ac_peak_7850 | 12.46522 | EP400_ENSG00000183495                                                   |
| 12 | 132568887 | 1.33E+08 | KD2-H4K8ac_peak_7851 | 10.19949 | EP400NL_ENSG00000185684                                                 |
| 12 | 132628319 | 1.33E+08 | KD2-H4K8ac_peak_7852 | 6.65673  | DDX51_ENSG00000185163;NOC4L_ENSG00000184967                             |
| 12 | 133066135 | 1.33E+08 | KD2-H4K8ac_peak_7853 | 4.06758  | FBRSL1_ENSG00000112787                                                  |
| 12 | 133136736 | 1.33E+08 | KD2-H4K8ac_peak_7854 | 11.05467 |                                                                         |
| 12 | 133176641 | 1.33E+08 | KD2-H4K8ac_peak_7855 | 9.85259  |                                                                         |
| 12 | 133177343 | 1.33E+08 | KD2-H4K8ac_peak_7856 | 4.86324  |                                                                         |
| 12 | 133180590 | 1.33E+08 | KD2-H4K8ac_peak_7857 | 6.66692  |                                                                         |
| 12 | 133263378 | 1.33E+08 | KD2-H4K8ac_peak_7858 | 15.22643 | POLE_ENSG00000177084;PXMP2_ENSG00000176894;RP13-672B3.2_ENSG00000256632 |
| 12 | 133286706 | 1.33E+08 | KD2-H4K8ac_peak_7859 | 13.72842 | PGAM5_ENSG00000247077                                                   |
| 12 | 133338049 | 1.33E+08 | KD2-H4K8ac_peak_7860 | 11.05467 | ANKLE2_ENSG00000176915                                                  |
| 12 | 133338794 | 1.33E+08 | KD2-H4K8ac_peak_7861 | 11.03331 | ANKLE2_ENSG00000176915                                                  |
| 12 | 133404768 | 1.33E+08 | KD2-H4K8ac_peak_7862 | 6.64891  | GOLGA3_ENSG00000090615                                                  |
| 12 | 133405416 | 1.33E+08 | KD2-H4K8ac_peak_7863 | 18.91876 | GOLGA3_ENSG00000090615                                                  |
| 12 | 133463820 | 1.33E+08 | KD2-H4K8ac_peak_7864 | 10.65724 | RP11-46H11.12_ENSG00000236617                                           |

|    |           |          |                      |          |                                                                                                   |
|----|-----------|----------|----------------------|----------|---------------------------------------------------------------------------------------------------|
| 12 | 133464431 | 1.33E+08 | KD2-H4K8ac_peak_7865 | 22.04674 | RP11-46H11.12_ENSG00000236617                                                                     |
| 12 | 133485404 | 1.33E+08 | KD2-H4K8ac_peak_7866 | 4.86324  |                                                                                                   |
| 12 | 133706481 | 1.34E+08 | KD2-H4K8ac_peak_7867 | 13.27022 | ZNF891_ENSG00000214029;ZNF10_ENSG00000256223;ZNF268_ENSG00000090612;CTD-2140B24.4_ENSG00000256825 |
| 12 | 133757838 | 1.34E+08 | KD2-H4K8ac_peak_7868 | 18.54875 |                                                                                                   |
| 13 | 20138833  | 20139203 | KD2-H4K8ac_peak_7869 | 6.16888  | CASC4P1_ENSG00000238132                                                                           |
| 13 | 20175435  | 20176647 | KD2-H4K8ac_peak_7870 | 12.93209 |                                                                                                   |
| 13 | 20356315  | 20356894 | KD2-H4K8ac_peak_7871 | 10.30284 | PSPC1_ENSG00000121390                                                                             |
| 13 | 20438105  | 20439033 | KD2-H4K8ac_peak_7872 | 17.55491 | ZMYM5_ENSG00000132950                                                                             |
| 13 | 20531587  | 20532500 | KD2-H4K8ac_peak_7873 | 20.18584 | ZMYM2_ENSG00000121741                                                                             |
| 13 | 20533481  | 20534176 | KD2-H4K8ac_peak_7874 | 9.15069  | ZMYM2_ENSG00000121741                                                                             |
| 13 | 20692566  | 20692922 | KD2-H4K8ac_peak_7875 | 6.40297  |                                                                                                   |
| 13 | 20701714  | 20703048 | KD2-H4K8ac_peak_7876 | 9.57101  |                                                                                                   |
| 13 | 21099768  | 21099999 | KD2-H4K8ac_peak_7877 | 7.47462  | CRYL1_ENSG00000165475                                                                             |
| 13 | 21277205  | 21277487 | KD2-H4K8ac_peak_7878 | 4.77079  | IL17D_ENSG00000172458;AL161772.1_ENSG00000265710                                                  |
| 13 | 21347465  | 21347896 | KD2-H4K8ac_peak_7879 | 6.20982  | N6AMT2_ENSG00000150456                                                                            |
| 13 | 21348258  | 21348592 | KD2-H4K8ac_peak_7880 | 9.96798  | N6AMT2_ENSG00000150456                                                                            |
| 13 | 21476523  | 21477388 | KD2-H4K8ac_peak_7881 | 15.59774 | XPO4_ENSG00000132953                                                                              |
| 13 | 21714755  | 21715011 | KD2-H4K8ac_peak_7882 | 5.9696   | SNORD27_ENSG00000252128;SAP18_ENSG00000150459                                                     |
| 13 | 21750413  | 21750633 | KD2-H4K8ac_peak_7883 | 7.36799  | SKA3_ENSG00000165480;MRP63_ENSG00000173141                                                        |
| 13 | 21750911  | 21751279 | KD2-H4K8ac_peak_7884 | 4.54006  | SKA3_ENSG00000165480;MRP63_ENSG00000173141                                                        |
| 13 | 22032946  | 22033368 | KD2-H4K8ac_peak_7885 | 8.30974  | ZDHHC20_ENSG00000180776                                                                           |
| 13 | 22033774  | 22034034 | KD2-H4K8ac_peak_7886 | 6.0073   | ZDHHC20_ENSG00000180776                                                                           |
| 13 | 22177746  | 22178233 | KD2-H4K8ac_peak_7887 | 12.08081 | MICU2_ENSG00000165487                                                                             |
| 13 | 24040559  | 24041038 | KD2-H4K8ac_peak_7888 | 8.5092   | LINC00327_ENSG00000232977                                                                         |
| 13 | 24041263  | 24041466 | KD2-H4K8ac_peak_7889 | 8.5781   | LINC00327_ENSG00000232977                                                                         |
| 13 | 24730375  | 24730568 | KD2-H4K8ac_peak_7890 | 8.88549  |                                                                                                   |
| 13 | 25086546  | 25087265 | KD2-H4K8ac_peak_7891 | 13.36684 | PARP4_ENSG00000102699                                                                             |
| 13 | 25115807  | 25116077 | KD2-H4K8ac_peak_7892 | 6.0605   |                                                                                                   |
| 13 | 25496617  | 25496954 | KD2-H4K8ac_peak_7893 | 10.0692  | CENPJ_ENSG00000151849                                                                             |
| 13 | 25497232  | 25498262 | KD2-H4K8ac_peak_7894 | 13.36684 | CENPJ_ENSG00000151849                                                                             |
| 13 | 25861261  | 25861959 | KD2-H4K8ac_peak_7895 | 13.09607 | MTMR6_ENSG00000139505                                                                             |
| 13 | 25874968  | 25875468 | KD2-H4K8ac_peak_7896 | 12.82393 | RP11-271M24.2_ENSG00000260509;NUPL1_ENSG00000139496                                               |
| 13 | 26795540  | 26795783 | KD2-H4K8ac_peak_7897 | 6.2781   |                                                                                                   |
| 13 | 26796139  | 26796640 | KD2-H4K8ac_peak_7898 | 21.12734 | RNF6_ENSG00000127870                                                                              |
| 13 | 26827957  | 26828675 | KD2-H4K8ac_peak_7899 | 18.54875 | CDK8_ENSG00000132964                                                                              |
| 13 | 27131265  | 27131530 | KD2-H4K8ac_peak_7900 | 7.48133  | WASF3_ENSG00000132970                                                                             |
| 13 | 27132144  | 27132382 | KD2-H4K8ac_peak_7901 | 7.36799  | WASF3_ENSG00000132970                                                                             |
| 13 | 27745221  | 27745501 | KD2-H4K8ac_peak_7902 | 11.05407 | USP12_ENSG00000152484;USP12-AS2_ENSG00000230641                                                   |
| 13 | 27746318  | 27746640 | KD2-H4K8ac_peak_7903 | 12.42547 | USP12_ENSG00000152484;USP12-AS2_ENSG00000230641                                                   |
| 13 | 27825603  | 27826207 | KD2-H4K8ac_peak_7904 | 11.05467 | RPL21_ENSG00000122026                                                                             |
| 13 | 27845129  | 27845491 | KD2-H4K8ac_peak_7905 | 5.82799  | RASL11A_ENSG00000122035                                                                           |
| 13 | 27998213  | 27998492 | KD2-H4K8ac_peak_7906 | 6.83936  | GTF3A_ENSG00000122034                                                                             |
| 13 | 28024044  | 28025319 | KD2-H4K8ac_peak_7907 | 21.75906 | MTIF3_ENSG00000122033                                                                             |
| 13 | 28194951  | 28195317 | KD2-H4K8ac_peak_7908 | 5.14125  | LNX2_ENSG00000139517;POLR1D_ENSG00000186184                                                       |
| 13 | 28196094  | 28196294 | KD2-H4K8ac_peak_7909 | 8.16906  |                                                                                                   |
| 13 | 28712703  | 28713271 | KD2-H4K8ac_peak_7910 | 5.3157   | PAN3-AS1_ENSG00000261485;PAN3_ENSG00000152520                                                     |



|    |          |          |                      |          |                                             |
|----|----------|----------|----------------------|----------|---------------------------------------------|
| 13 | 29232700 | 29233157 | KD2-H4K8ac_peak_7911 | 8.26945  | POMP_ENSG00000132963                        |
| 13 | 29233351 | 29233687 | KD2-H4K8ac_peak_7912 | 6.99815  | POMP_ENSG00000132963                        |
| 13 | 29293418 | 29293860 | KD2-H4K8ac_peak_7913 | 5.57044  | SLC46A3_ENSG00000139508                     |
| 13 | 30168948 | 30169748 | KD2-H4K8ac_peak_7914 | 19.35989 | SLC7A1_ENSG00000139514                      |
| 13 | 30316891 | 30317132 | KD2-H4K8ac_peak_7915 | 6.40683  |                                             |
| 13 | 30424294 | 30424741 | KD2-H4K8ac_peak_7916 | 12.82393 | UBL3_ENSG00000122042                        |
| 13 | 30766886 | 30767228 | KD2-H4K8ac_peak_7917 | 6.78668  |                                             |
| 13 | 30881305 | 30882097 | KD2-H4K8ac_peak_7918 | 22.59108 | KATNAL1_ENSG00000102781                     |
| 13 | 30937946 | 30938287 | KD2-H4K8ac_peak_7919 | 4.211    |                                             |
| 13 | 30969254 | 30969560 | KD2-H4K8ac_peak_7920 | 8.55271  |                                             |
| 13 | 31019767 | 31020265 | KD2-H4K8ac_peak_7921 | 6.8836   |                                             |
| 13 | 31038340 | 31038729 | KD2-H4K8ac_peak_7922 | 6.40683  |                                             |
| 13 | 31039642 | 31039971 | KD2-H4K8ac_peak_7923 | 8.30974  |                                             |
| 13 | 31191306 | 31191608 | KD2-H4K8ac_peak_7924 | 8.53092  | HMGB1_ENSG00000189403;USPL1_ENSG00000132952 |
| 13 | 31248340 | 31248736 | KD2-H4K8ac_peak_7925 | 5.88845  |                                             |
| 13 | 31437450 | 31437656 | KD2-H4K8ac_peak_7926 | 6.56926  |                                             |
| 13 | 31445282 | 31445710 | KD2-H4K8ac_peak_7927 | 5.01262  |                                             |
| 13 | 31489822 | 31490033 | KD2-H4K8ac_peak_7928 | 4.42765  |                                             |
| 13 | 31735178 | 31735775 | KD2-H4K8ac_peak_7929 | 6.99815  | HSPH1_ENSG00000120694                       |
| 13 | 31774075 | 31774383 | KD2-H4K8ac_peak_7930 | 19.03298 | B3GALTL_ENSG00000187676                     |
| 13 | 31783586 | 31783818 | KD2-H4K8ac_peak_7931 | 11.2938  |                                             |
| 13 | 32244675 | 32244918 | KD2-H4K8ac_peak_7932 | 7.01964  |                                             |
| 13 | 32438842 | 32439260 | KD2-H4K8ac_peak_7933 | 9.59147  |                                             |
| 13 | 32884036 | 32884244 | KD2-H4K8ac_peak_7934 | 7.12754  |                                             |
| 13 | 32889257 | 32889498 | KD2-H4K8ac_peak_7935 | 13.50024 | ZAR1L_ENSG00000189167;BRCA2_ENSG00000139618 |
| 13 | 32889762 | 32889991 | KD2-H4K8ac_peak_7936 | 14.8083  | ZAR1L_ENSG00000189167;BRCA2_ENSG00000139618 |
| 13 | 33001462 | 33002169 | KD2-H4K8ac_peak_7937 | 8.85813  | N4BP2L1_ENSG00000139597                     |
| 13 | 33002396 | 33002712 | KD2-H4K8ac_peak_7938 | 7.40314  | N4BP2L1_ENSG00000139597                     |
| 13 | 33113286 | 33113731 | KD2-H4K8ac_peak_7939 | 6.94255  | N4BP2L2_ENSG00000244754                     |
| 13 | 33160760 | 33160964 | KD2-H4K8ac_peak_7940 | 6.66692  | PDS5B_ENSG00000083642                       |
| 13 | 33514725 | 33514929 | KD2-H4K8ac_peak_7941 | 4.86324  |                                             |
| 13 | 33590051 | 33590829 | KD2-H4K8ac_peak_7942 | 8.5781   | KL_ENSG00000133116                          |
| 13 | 33764375 | 33764585 | KD2-H4K8ac_peak_7943 | 6.00226  |                                             |
| 13 | 33778102 | 33778383 | KD2-H4K8ac_peak_7944 | 4.211    |                                             |
| 13 | 33780653 | 33780881 | KD2-H4K8ac_peak_7945 | 7.22457  |                                             |
| 13 | 34111823 | 34112102 | KD2-H4K8ac_peak_7946 | 8.1233   |                                             |
| 13 | 34116223 | 34116448 | KD2-H4K8ac_peak_7947 | 5.10276  |                                             |
| 13 | 34458883 | 34459290 | KD2-H4K8ac_peak_7948 | 10.05606 |                                             |
| 13 | 34492140 | 34492369 | KD2-H4K8ac_peak_7949 | 3.91903  |                                             |
| 13 | 35324411 | 35324669 | KD2-H4K8ac_peak_7950 | 6.16888  |                                             |
| 13 | 36044703 | 36045532 | KD2-H4K8ac_peak_7951 | 15.66774 |                                             |
| 13 | 36049332 | 36050272 | KD2-H4K8ac_peak_7952 | 9.11031  | MAB21L1_ENSG00000180660                     |
| 13 | 36052474 | 36053150 | KD2-H4K8ac_peak_7953 | 17.91241 |                                             |
| 13 | 36247250 | 36247653 | KD2-H4K8ac_peak_7954 | 8.17902  |                                             |
| 13 | 36289068 | 36289309 | KD2-H4K8ac_peak_7955 | 4.20044  |                                             |
| 13 | 36290902 | 36291137 | KD2-H4K8ac_peak_7956 | 5.08628  |                                             |

|    |          |          |                      |          |                                                                               |
|----|----------|----------|----------------------|----------|-------------------------------------------------------------------------------|
| 13 | 36294713 | 36295128 | KD2-H4K8ac_peak_7957 | 7.89389  |                                                                               |
| 13 | 36295657 | 36295897 | KD2-H4K8ac_peak_7958 | 7.36799  |                                                                               |
| 13 | 36358899 | 36359097 | KD2-H4K8ac_peak_7959 | 6.66692  |                                                                               |
| 13 | 36359449 | 36359683 | KD2-H4K8ac_peak_7960 | 9.89126  |                                                                               |
| 13 | 36360608 | 36360812 | KD2-H4K8ac_peak_7961 | 6.16888  |                                                                               |
| 13 | 36364017 | 36364260 | KD2-H4K8ac_peak_7962 | 7.27716  |                                                                               |
| 13 | 36383750 | 36384376 | KD2-H4K8ac_peak_7963 | 7.08474  |                                                                               |
| 13 | 36562254 | 36562579 | KD2-H4K8ac_peak_7964 | 7.75499  |                                                                               |
| 13 | 36606104 | 36606338 | KD2-H4K8ac_peak_7965 | 6.83936  |                                                                               |
| 13 | 36871625 | 36872289 | KD2-H4K8ac_peak_7966 | 5.13615  | SOHLH2_ENSG00000120669;CCDC169-SOHLH2_ENSG00000250709;CCDC169_ENSG00000242715 |
| 13 | 36920369 | 36920917 | KD2-H4K8ac_peak_7967 | 18.54875 | SPG20OS_ENSG00000120664                                                       |
| 13 | 37006292 | 37006496 | KD2-H4K8ac_peak_7968 | 5.61067  | CCNA1_ENSG00000133101                                                         |
| 13 | 37248262 | 37248556 | KD2-H4K8ac_peak_7969 | 5.45396  | SERTM1_ENSG00000180440                                                        |
| 13 | 37393449 | 37394107 | KD2-H4K8ac_peak_7970 | 8.55271  | RFXAP_ENSG00000133111                                                         |
| 13 | 37494046 | 37495041 | KD2-H4K8ac_peak_7971 | 12.78794 | SMAD9_ENSG00000120693                                                         |
| 13 | 37573083 | 37573416 | KD2-H4K8ac_peak_7972 | 12.36441 | ALG5_ENSG00000120697;EXOSC8_ENSG00000120699                                   |
| 13 | 37573979 | 37574728 | KD2-H4K8ac_peak_7973 | 8.41122  | ALG5_ENSG00000120697                                                          |
| 13 | 37575066 | 37575581 | KD2-H4K8ac_peak_7974 | 5.14125  | ALG5_ENSG00000120697                                                          |
| 13 | 37633535 | 37633753 | KD2-H4K8ac_peak_7975 | 10.0692  | SUPT20H_ENSG00000102710                                                       |
| 13 | 39489909 | 39490146 | KD2-H4K8ac_peak_7976 | 6.66692  |                                                                               |
| 13 | 39612576 | 39612938 | KD2-H4K8ac_peak_7977 | 6.36375  | PROSER1_ENSG00000120685;NHLRC3_ENSG00000188811                                |
| 13 | 40177030 | 40177238 | KD2-H4K8ac_peak_7978 | 7.76329  | LHFP_ENSG00000183722                                                          |
| 13 | 40229904 | 40230199 | KD2-H4K8ac_peak_7979 | 10.05606 | COG6_ENSG00000133103                                                          |
| 13 | 40467380 | 40467579 | KD2-H4K8ac_peak_7980 | 5.45396  |                                                                               |
| 13 | 40764246 | 40764510 | KD2-H4K8ac_peak_7981 | 3.75035  |                                                                               |
| 13 | 40957324 | 40957632 | KD2-H4K8ac_peak_7982 | 16.73922 |                                                                               |
| 13 | 41238417 | 41239298 | KD2-H4K8ac_peak_7983 | 7.27716  |                                                                               |
| 13 | 41345522 | 41345942 | KD2-H4K8ac_peak_7984 | 9.15329  | MRPS31_ENSG00000102738                                                        |
| 13 | 41363296 | 41363524 | KD2-H4K8ac_peak_7985 | 8.28234  | SLC25A15_ENSG00000102743                                                      |
| 13 | 41363865 | 41364545 | KD2-H4K8ac_peak_7986 | 13.87818 | SLC25A15_ENSG00000102743                                                      |
| 13 | 41483966 | 41484331 | KD2-H4K8ac_peak_7987 | 4.70206  |                                                                               |
| 13 | 41489899 | 41490418 | KD2-H4K8ac_peak_7988 | 5.16439  |                                                                               |
| 13 | 41495981 | 41496370 | KD2-H4K8ac_peak_7989 | 6.65673  | TPTE2P5_ENSG00000168852;SUGT1P3_ENSG00000239827                               |
| 13 | 41706410 | 41706695 | KD2-H4K8ac_peak_7990 | 8.17902  | KBTBD6_ENSG00000165572                                                        |
| 13 | 41768109 | 41768648 | KD2-H4K8ac_peak_7991 | 17.70889 | KBTBD7_ENSG00000120696                                                        |
| 13 | 41885449 | 41885941 | KD2-H4K8ac_peak_7992 | 12.93209 | NAA16_ENSG00000172766                                                         |
| 13 | 42534789 | 42535761 | KD2-H4K8ac_peak_7993 | 24.9142  | VWA8_ENSG00000102763                                                          |
| 13 | 42845441 | 42846024 | KD2-H4K8ac_peak_7994 | 12.93209 | AKAP11_ENSG00000023516                                                        |
| 13 | 42846339 | 42846736 | KD2-H4K8ac_peak_7995 | 4.86324  | AKAP11_ENSG00000023516                                                        |
| 13 | 43597349 | 43598170 | KD2-H4K8ac_peak_7996 | 9.36516  | DNAJC15_ENSG00000120675                                                       |
| 13 | 44361297 | 44361867 | KD2-H4K8ac_peak_7997 | 11.03331 | ENOX1_ENSG00000120658;RP11-168P13.1_ENSG00000270522                           |
| 13 | 44453151 | 44453826 | KD2-H4K8ac_peak_7998 | 19.91242 | CCDC122_ENSG00000151773;LACC1_ENSG00000179630                                 |
| 13 | 44454096 | 44454328 | KD2-H4K8ac_peak_7999 | 8.17902  | CCDC122_ENSG00000151773;LACC1_ENSG00000179630                                 |
| 13 | 44715398 | 44716046 | KD2-H4K8ac_peak_8000 | 8.58725  | SMIM2-AS1_ENSG00000227258                                                     |
| 13 | 44834055 | 44834424 | KD2-H4K8ac_peak_8001 | 10.68173 |                                                                               |
| 13 | 44846156 | 44846423 | KD2-H4K8ac_peak_8002 | 6.40683  |                                                                               |

|    |          |          |                      |          |                                                                            |
|----|----------|----------|----------------------|----------|----------------------------------------------------------------------------|
| 13 | 44848164 | 44848503 | KD2-H4K8ac_peak_8003 | 6.99815  |                                                                            |
| 13 | 44880870 | 44881077 | KD2-H4K8ac_peak_8004 | 6.99815  |                                                                            |
| 13 | 44905707 | 44905904 | KD2-H4K8ac_peak_8005 | 10.46264 |                                                                            |
| 13 | 44946718 | 44948558 | KD2-H4K8ac_peak_8006 | 24.48793 | SERP2_ENSG00000151778                                                      |
| 13 | 44971545 | 44971767 | KD2-H4K8ac_peak_8007 | 12.84642 |                                                                            |
| 13 | 44977620 | 44978096 | KD2-H4K8ac_peak_8008 | 4.67342  |                                                                            |
| 13 | 44978347 | 44979538 | KD2-H4K8ac_peak_8009 | 8.5092   | LINC01071_ENSG00000237361                                                  |
| 13 | 45009655 | 45009870 | KD2-H4K8ac_peak_8010 | 7.27716  |                                                                            |
| 13 | 45150846 | 45151295 | KD2-H4K8ac_peak_8011 | 19.43192 | TSC22D1_ENSG00000102804                                                    |
| 13 | 45151707 | 45152266 | KD2-H4K8ac_peak_8012 | 9.63487  | TSC22D1_ENSG00000102804                                                    |
| 13 | 45307833 | 45308119 | KD2-H4K8ac_peak_8013 | 6.56926  |                                                                            |
| 13 | 45338545 | 45338748 | KD2-H4K8ac_peak_8014 | 7.72801  |                                                                            |
| 13 | 45468128 | 45468386 | KD2-H4K8ac_peak_8015 | 8.94469  |                                                                            |
| 13 | 45493240 | 45493438 | KD2-H4K8ac_peak_8016 | 9.15069  |                                                                            |
| 13 | 45563091 | 45564069 | KD2-H4K8ac_peak_8017 | 15.69572 | NUFIP1_ENSG00000083635;GPALPP1_ENSG00000133114                             |
| 13 | 45884983 | 45885239 | KD2-H4K8ac_peak_8018 | 6.81873  |                                                                            |
| 13 | 45914855 | 45915222 | KD2-H4K8ac_peak_8019 | 13.80019 | TPT1_ENSG00000133112;RP11-290D2.6_ENSG00000273149;TPT1-AS1_ENSG00000170919 |
| 13 | 45915707 | 45916011 | KD2-H4K8ac_peak_8020 | 12.42761 | TPT1_ENSG00000133112;TPT1-AS1_ENSG00000170919                              |
| 13 | 46038330 | 46038703 | KD2-H4K8ac_peak_8021 | 13.09607 | COG3_ENSG00000136152                                                       |
| 13 | 46039153 | 46039455 | KD2-H4K8ac_peak_8022 | 8.36432  | COG3_ENSG00000136152                                                       |
| 13 | 46397776 | 46398088 | KD2-H4K8ac_peak_8023 | 6.24747  |                                                                            |
| 13 | 46626475 | 46626848 | KD2-H4K8ac_peak_8024 | 18.5703  | ZC3H13_ENSG00000123200;CPB2-AS1_ENSG00000235903                            |
| 13 | 46786171 | 46786491 | KD2-H4K8ac_peak_8025 | 5.9696   | LCPI1_ENSG00000136167;LRRRC63_ENSG00000173988                              |
| 13 | 47126259 | 47126602 | KD2-H4K8ac_peak_8026 | 5.20908  | LRCH1_ENSG00000136141                                                      |
| 13 | 47126917 | 47127160 | KD2-H4K8ac_peak_8027 | 13.80019 | LRCH1_ENSG00000136141                                                      |
| 13 | 47204661 | 47204871 | KD2-H4K8ac_peak_8028 | 6.16888  |                                                                            |
| 13 | 47211491 | 47211799 | KD2-H4K8ac_peak_8029 | 9.15329  |                                                                            |
| 13 | 47370352 | 47371274 | KD2-H4K8ac_peak_8030 | 13.73635 | ESD_ENSG00000139684                                                        |
| 13 | 47372021 | 47372231 | KD2-H4K8ac_peak_8031 | 8.00457  | ESD_ENSG00000139684                                                        |
| 13 | 48574934 | 48575400 | KD2-H4K8ac_peak_8032 | 19.9503  | SUCLA2-AS1_ENSG00000227848                                                 |
| 13 | 48575810 | 48576466 | KD2-H4K8ac_peak_8033 | 6.00226  | SUCLA2-AS1_ENSG00000227848                                                 |
| 13 | 48610996 | 48611301 | KD2-H4K8ac_peak_8034 | 4.75764  | SUCLA2_ENSG00000136143;NUDT15_ENSG00000136159                              |
| 13 | 48611862 | 48612062 | KD2-H4K8ac_peak_8035 | 8.55271  | SUCLA2_ENSG00000136143;NUDT15_ENSG00000136159                              |
| 13 | 48612274 | 48612555 | KD2-H4K8ac_peak_8036 | 5.88845  | SUCLA2_ENSG00000136143;NUDT15_ENSG00000136159                              |
| 13 | 48668672 | 48669167 | KD2-H4K8ac_peak_8037 | 8.30974  | MED4_ENSG00000136146                                                       |
| 13 | 48669570 | 48669804 | KD2-H4K8ac_peak_8038 | 11.30637 | MED4_ENSG00000136146                                                       |
| 13 | 48807456 | 48807767 | KD2-H4K8ac_peak_8039 | 7.76104  | ITM2B_ENSG00000136156                                                      |
| 13 | 48877370 | 48877742 | KD2-H4K8ac_peak_8040 | 6.20982  | LINC00441_ENSG00000231473;RB1_ENSG00000139687                              |
| 13 | 48877961 | 48878368 | KD2-H4K8ac_peak_8041 | 12.74171 | LINC00441_ENSG00000231473;RB1_ENSG00000139687                              |
| 13 | 49105991 | 49106758 | KD2-H4K8ac_peak_8042 | 7.40111  | RCBTB2_ENSG00000136161                                                     |
| 13 | 49106966 | 49107791 | KD2-H4K8ac_peak_8043 | 15.81711 | RCBTB2_ENSG00000136161                                                     |
| 13 | 49116630 | 49116827 | KD2-H4K8ac_peak_8044 | 5.43522  |                                                                            |
| 13 | 49549248 | 49550627 | KD2-H4K8ac_peak_8045 | 7.76329  | FNDC3A_ENSG00000102531                                                     |
| 13 | 49684118 | 49684325 | KD2-H4K8ac_peak_8046 | 7.12754  |                                                                            |
| 13 | 49766475 | 49766739 | KD2-H4K8ac_peak_8047 | 4.3289   |                                                                            |
| 13 | 49822215 | 49822452 | KD2-H4K8ac_peak_8048 | 6.76298  | CDADC1_ENSG00000102543                                                     |

|    |          |          |                      |          |                                                       |
|----|----------|----------|----------------------|----------|-------------------------------------------------------|
| 13 | 50017866 | 50018062 | KD2-H4K8ac_peak_8049 | 9.20193  | CAB39L_ENSG00000102547;SETDB2_ENSG00000136169         |
| 13 | 50159261 | 50160498 | KD2-H4K8ac_peak_8050 | 17.8868  | RCBTB1_ENSG00000136144                                |
| 13 | 50199742 | 50200032 | KD2-H4K8ac_peak_8051 | 6.40683  |                                                       |
| 13 | 50265816 | 50266148 | KD2-H4K8ac_peak_8052 | 9.59147  | EBPL_ENSG00000123179                                  |
| 13 | 50366090 | 50366630 | KD2-H4K8ac_peak_8053 | 5.59859  | KPNA3_ENSG00000102753                                 |
| 13 | 50366881 | 50367084 | KD2-H4K8ac_peak_8054 | 11.04256 | KPNA3_ENSG00000102753                                 |
| 13 | 50510990 | 50511226 | KD2-H4K8ac_peak_8055 | 8.17902  | SPRYD7_ENSG00000123178                                |
| 13 | 50570114 | 50570879 | KD2-H4K8ac_peak_8056 | 12.00273 | TRIM13_ENSG00000204977;MIR3613_ENSG00000264864        |
| 13 | 50571201 | 50571588 | KD2-H4K8ac_peak_8057 | 12.96672 | MIR3613_ENSG00000264864                               |
| 13 | 50655602 | 50655930 | KD2-H4K8ac_peak_8058 | 5.54647  | DLEU1_ENSG00000176124                                 |
| 13 | 50698046 | 50698534 | KD2-H4K8ac_peak_8059 | 14.00658 |                                                       |
| 13 | 50699068 | 50699652 | KD2-H4K8ac_peak_8060 | 11.24702 | DLEU2_ENSG00000231607                                 |
| 13 | 50699875 | 50700415 | KD2-H4K8ac_peak_8061 | 20.76543 | DLEU2_ENSG00000231607                                 |
| 13 | 50774605 | 50774946 | KD2-H4K8ac_peak_8062 | 5.30799  |                                                       |
| 13 | 50775596 | 50775798 | KD2-H4K8ac_peak_8063 | 5.57044  |                                                       |
| 13 | 51103628 | 51103957 | KD2-H4K8ac_peak_8064 | 7.1181   |                                                       |
| 13 | 51168729 | 51169015 | KD2-H4K8ac_peak_8065 | 6.31143  |                                                       |
| 13 | 51264429 | 51264797 | KD2-H4K8ac_peak_8066 | 4.42765  |                                                       |
| 13 | 51375381 | 51375590 | KD2-H4K8ac_peak_8067 | 7.79558  |                                                       |
| 13 | 51417073 | 51417394 | KD2-H4K8ac_peak_8068 | 4.42765  | DLEU7_ENSG00000186047                                 |
| 13 | 51483674 | 51484760 | KD2-H4K8ac_peak_8069 | 17.55491 | RNASEH2B-AS1_ENSG00000233672;RNASEH2B_ENSG00000136104 |
| 13 | 51795988 | 51796619 | KD2-H4K8ac_peak_8070 | 15.81711 | FAM124A_ENSG00000150510                               |
| 13 | 51821082 | 51821486 | KD2-H4K8ac_peak_8071 | 7.40314  |                                                       |
| 13 | 51872819 | 51873135 | KD2-H4K8ac_peak_8072 | 12.42547 |                                                       |
| 13 | 52026171 | 52027110 | KD2-H4K8ac_peak_8073 | 12.81138 | INTS6-AS1_ENSG00000236778                             |
| 13 | 52027557 | 52027987 | KD2-H4K8ac_peak_8074 | 9.11031  | INTS6_ENSG00000102786;RPS4XP16_ENSG00000224892        |
| 13 | 52157527 | 52158009 | KD2-H4K8ac_peak_8075 | 12.14909 | WDFY2_ENSG00000139668                                 |
| 13 | 52193288 | 52193484 | KD2-H4K8ac_peak_8076 | 4.04247  |                                                       |
| 13 | 52194403 | 52194872 | KD2-H4K8ac_peak_8077 | 12.25733 |                                                       |
| 13 | 52195092 | 52195339 | KD2-H4K8ac_peak_8078 | 4.57371  |                                                       |
| 13 | 52198865 | 52199145 | KD2-H4K8ac_peak_8079 | 5.25667  |                                                       |
| 13 | 52202196 | 52202682 | KD2-H4K8ac_peak_8080 | 25.6154  |                                                       |
| 13 | 52206458 | 52206663 | KD2-H4K8ac_peak_8081 | 4.67737  |                                                       |
| 13 | 52356398 | 52356604 | KD2-H4K8ac_peak_8082 | 4.86324  |                                                       |
| 13 | 52361376 | 52361640 | KD2-H4K8ac_peak_8083 | 8.30114  |                                                       |
| 13 | 52377986 | 52378568 | KD2-H4K8ac_peak_8084 | 22.0091  | DHRS12_ENSG00000102796;RP11-327P2.5_ENSG00000231856   |
| 13 | 52733269 | 52733757 | KD2-H4K8ac_peak_8085 | 16.57619 | NEK3_ENSG00000136098                                  |
| 13 | 52768310 | 52769254 | KD2-H4K8ac_peak_8086 | 11.43353 | MRPS31P5_ENSG00000243406                              |
| 13 | 52980047 | 52980726 | KD2-H4K8ac_peak_8087 | 10.05606 | THSD1_ENSG00000136114                                 |
| 13 | 53024244 | 53024726 | KD2-H4K8ac_peak_8088 | 23.72814 | VPS36_ENSG00000136100                                 |
| 13 | 53174008 | 53174445 | KD2-H4K8ac_peak_8089 | 7.59643  |                                                       |
| 13 | 53191033 | 53191315 | KD2-H4K8ac_peak_8090 | 9.1707   | HNRNPA1L2_ENSG00000139675;MRPS31P4_ENSG00000250299    |
| 13 | 53226988 | 53227356 | KD2-H4K8ac_peak_8091 | 8.65175  | SUGT1_ENSG00000165416                                 |
| 13 | 53643064 | 53643297 | KD2-H4K8ac_peak_8092 | 8.62078  |                                                       |
| 13 | 53775879 | 53776156 | KD2-H4K8ac_peak_8093 | 6.66692  |                                                       |
| 13 | 59853210 | 59853413 | KD2-H4K8ac_peak_8094 | 6.00226  |                                                       |

|    |          |          |                      |          |                                                                          |
|----|----------|----------|----------------------|----------|--------------------------------------------------------------------------|
| 13 | 60738284 | 60738599 | KD2-H4K8ac_peak_8095 | 8.55271  | DIAPH3_ENSG00000139734                                                   |
| 13 | 60970679 | 60972005 | KD2-H4K8ac_peak_8096 | 14.55656 | TDRD3_ENSG00000083544                                                    |
| 13 | 67231169 | 67231466 | KD2-H4K8ac_peak_8097 | 8.1233   |                                                                          |
| 13 | 67240345 | 67240583 | KD2-H4K8ac_peak_8098 | 4.77079  |                                                                          |
| 13 | 67804844 | 67805055 | KD2-H4K8ac_peak_8099 | 7.18615  | PCDH9_ENSG00000184226                                                    |
| 13 | 72439194 | 72440923 | KD2-H4K8ac_peak_8100 | 9.01262  | DACH1_ENSG00000165659                                                    |
| 13 | 73098119 | 73098328 | KD2-H4K8ac_peak_8101 | 5.25071  |                                                                          |
| 13 | 73109053 | 73109357 | KD2-H4K8ac_peak_8102 | 3.99369  |                                                                          |
| 13 | 73271095 | 73271341 | KD2-H4K8ac_peak_8103 | 5.04237  |                                                                          |
| 13 | 73301279 | 73301725 | KD2-H4K8ac_peak_8104 | 9.34989  | MZT1_ENSG00000204899;BORA_ENSG00000136122                                |
| 13 | 74339628 | 74339919 | KD2-H4K8ac_peak_8105 | 4.86324  |                                                                          |
| 13 | 74708739 | 74709621 | KD2-H4K8ac_peak_8106 | 30.77376 | KLF12_ENSG00000118922                                                    |
| 13 | 74709836 | 74710657 | KD2-H4K8ac_peak_8107 | 8.59301  |                                                                          |
| 13 | 74862611 | 74863110 | KD2-H4K8ac_peak_8108 | 5.75452  | RNY1P5_ENSG00000206617                                                   |
| 13 | 75129538 | 75129736 | KD2-H4K8ac_peak_8109 | 5.29555  |                                                                          |
| 13 | 75794268 | 75794513 | KD2-H4K8ac_peak_8110 | 5.43522  |                                                                          |
| 13 | 75875461 | 75875707 | KD2-H4K8ac_peak_8111 | 6.16888  |                                                                          |
| 13 | 76032304 | 76032639 | KD2-H4K8ac_peak_8112 | 5.20908  |                                                                          |
| 13 | 76055785 | 76056058 | KD2-H4K8ac_peak_8113 | 4.68806  | TBC1D4_ENSG00000136111                                                   |
| 13 | 76111564 | 76111881 | KD2-H4K8ac_peak_8114 | 5.88845  |                                                                          |
| 13 | 76112297 | 76112545 | KD2-H4K8ac_peak_8115 | 4.67342  |                                                                          |
| 13 | 76123972 | 76124302 | KD2-H4K8ac_peak_8116 | 7.40111  | COMMD6_ENSG00000188243;UCHL3_ENSG00000118939;RP11-29G8.3_ENSG00000261553 |
| 13 | 76209665 | 76210234 | KD2-H4K8ac_peak_8117 | 12.06346 | RP11-173B14.5_ENSG00000261105                                            |
| 13 | 76210473 | 76210964 | KD2-H4K8ac_peak_8118 | 4.44527  | RP11-173B14.5_ENSG00000261105                                            |
| 13 | 76387548 | 76387858 | KD2-H4K8ac_peak_8119 | 6.16888  |                                                                          |
| 13 | 77459510 | 77460253 | KD2-H4K8ac_peak_8120 | 6.40683  | KCTD12_ENSG00000178695;AC000403.1_ENSG00000264908                        |
| 13 | 77565613 | 77565907 | KD2-H4K8ac_peak_8121 | 6.85193  | CLN5_ENSG00000102805                                                     |
| 13 | 77600947 | 77601247 | KD2-H4K8ac_peak_8122 | 14.66631 | FBXL3_ENSG00000005812                                                    |
| 13 | 77903519 | 77904114 | KD2-H4K8ac_peak_8123 | 10.08707 |                                                                          |
| 13 | 78271904 | 78272121 | KD2-H4K8ac_peak_8124 | 5.30799  | SLAIN1_ENSG00000139737;MIR3665_ENSG00000266325                           |
| 13 | 78899267 | 78899511 | KD2-H4K8ac_peak_8125 | 9.15329  |                                                                          |
| 13 | 79232790 | 79233172 | KD2-H4K8ac_peak_8126 | 13.09607 | RNF219_ENSG00000152193                                                   |
| 13 | 79233888 | 79234682 | KD2-H4K8ac_peak_8127 | 9.15329  | RNF219_ENSG00000152193                                                   |
| 13 | 79979798 | 79980967 | KD2-H4K8ac_peak_8128 | 10.29842 | RBM26_ENSG00000139746;RBM26-AS1_ENSG00000227354                          |
| 13 | 80055083 | 80055854 | KD2-H4K8ac_peak_8129 | 20.78681 | NDFIP2-AS1_ENSG00000232132;NDFIP2_ENSG00000102471                        |
| 13 | 80232730 | 80233060 | KD2-H4K8ac_peak_8130 | 4.06758  |                                                                          |
| 13 | 80255049 | 80255405 | KD2-H4K8ac_peak_8131 | 8.88549  |                                                                          |
| 13 | 80372440 | 80372920 | KD2-H4K8ac_peak_8132 | 7.47462  |                                                                          |
| 13 | 80377156 | 80377517 | KD2-H4K8ac_peak_8133 | 7.36933  |                                                                          |
| 13 | 80448851 | 80449063 | KD2-H4K8ac_peak_8134 | 5.16439  |                                                                          |
| 13 | 80509879 | 80510210 | KD2-H4K8ac_peak_8135 | 9.15069  |                                                                          |
| 13 | 80510881 | 80511273 | KD2-H4K8ac_peak_8136 | 9.11031  |                                                                          |
| 13 | 80914068 | 80915813 | KD2-H4K8ac_peak_8137 | 17.75427 | SPRY2_ENSG00000136158                                                    |
| 13 | 80916639 | 80917123 | KD2-H4K8ac_peak_8138 | 13.9234  |                                                                          |
| 13 | 80917356 | 80917554 | KD2-H4K8ac_peak_8139 | 4.76709  |                                                                          |
| 13 | 82739706 | 82740145 | KD2-H4K8ac_peak_8140 | 14.74047 |                                                                          |

|    |           |          |                      |          |                                                  |
|----|-----------|----------|----------------------|----------|--------------------------------------------------|
| 13 | 85840243  | 85841372 | KD2-H4K8ac_peak_8141 | 8.17902  |                                                  |
| 13 | 91999164  | 91999639 | KD2-H4K8ac_peak_8142 | 5.54647  | MIR17HG_ENSG00000215417                          |
| 13 | 91999965  | 92001221 | KD2-H4K8ac_peak_8143 | 33.14727 | MIR17HG_ENSG00000215417                          |
| 13 | 93015675  | 93015990 | KD2-H4K8ac_peak_8144 | 9.15329  |                                                  |
| 13 | 93879200  | 93880973 | KD2-H4K8ac_peak_8145 | 10.43145 | GPC6_ENSG00000183098                             |
| 13 | 94534449  | 94534661 | KD2-H4K8ac_peak_8146 | 7.12754  |                                                  |
| 13 | 95107442  | 95107635 | KD2-H4K8ac_peak_8147 | 4.42765  |                                                  |
| 13 | 95200709  | 95201658 | KD2-H4K8ac_peak_8148 | 13.81781 |                                                  |
| 13 | 95202079  | 95202711 | KD2-H4K8ac_peak_8149 | 11.70505 |                                                  |
| 13 | 95248003  | 95248444 | KD2-H4K8ac_peak_8150 | 14.98936 | TGDS_ENSG00000088451                             |
| 13 | 95248838  | 95249085 | KD2-H4K8ac_peak_8151 | 11.43353 | TGDS_ENSG00000088451                             |
| 13 | 95253586  | 95253783 | KD2-H4K8ac_peak_8152 | 8.83582  | GPR180_ENSG00000152749                           |
| 13 | 95254191  | 95254594 | KD2-H4K8ac_peak_8153 | 7.76329  | GPR180_ENSG00000152749                           |
| 13 | 95655380  | 95655653 | KD2-H4K8ac_peak_8154 | 5.16439  |                                                  |
| 13 | 95953208  | 95953633 | KD2-H4K8ac_peak_8155 | 5.30799  | ABCC4_ENSG00000125257                            |
| 13 | 96296430  | 96296780 | KD2-H4K8ac_peak_8156 | 10.05606 | DZIP1_ENSG00000134874                            |
| 13 | 96297090  | 96297317 | KD2-H4K8ac_peak_8157 | 7.29632  | DZIP1_ENSG00000134874                            |
| 13 | 96705244  | 96705561 | KD2-H4K8ac_peak_8158 | 8.85813  | UGGT2_ENSG00000102595                            |
| 13 | 96705960  | 96706163 | KD2-H4K8ac_peak_8159 | 7.51935  | UGGT2_ENSG00000102595                            |
| 13 | 97887189  | 97887479 | KD2-H4K8ac_peak_8160 | 5.57044  |                                                  |
| 13 | 98085869  | 98086080 | KD2-H4K8ac_peak_8161 | 10.87093 | RAP2A_ENSG00000125249                            |
| 13 | 98627650  | 98628683 | KD2-H4K8ac_peak_8162 | 16.8435  |                                                  |
| 13 | 98628935  | 98629427 | KD2-H4K8ac_peak_8163 | 10.19949 |                                                  |
| 13 | 98794942  | 98795220 | KD2-H4K8ac_peak_8164 | 5.9696   | FARP1_ENSG00000152767                            |
| 13 | 98795703  | 98796390 | KD2-H4K8ac_peak_8165 | 8.55271  | FARP1_ENSG00000152767                            |
| 13 | 98824480  | 98824723 | KD2-H4K8ac_peak_8166 | 5.32933  |                                                  |
| 13 | 99131911  | 99132189 | KD2-H4K8ac_peak_8167 | 5.7068   |                                                  |
| 13 | 99229506  | 99230189 | KD2-H4K8ac_peak_8168 | 13.80019 | STK24_ENSG00000102572;STK24-AS1_ENSG00000224418  |
| 13 | 99274880  | 99275168 | KD2-H4K8ac_peak_8169 | 7.40111  |                                                  |
| 13 | 99404801  | 99405035 | KD2-H4K8ac_peak_8170 | 6.9809   | SLC15A1_ENSG00000088386                          |
| 13 | 99473388  | 99473656 | KD2-H4K8ac_peak_8171 | 11.05467 |                                                  |
| 13 | 99738516  | 99739851 | KD2-H4K8ac_peak_8172 | 10.43145 | DOCK9_ENSG00000088387;DOCK9-AS2_ENSG00000260992  |
| 13 | 99740121  | 99740361 | KD2-H4K8ac_peak_8173 | 5.9696   | DOCK9-AS2_ENSG00000260992                        |
| 13 | 99852351  | 99852887 | KD2-H4K8ac_peak_8174 | 25.6154  | UBAC2-AS1_ENSG00000228889;UBAC2_ENSG00000134882  |
| 13 | 99853112  | 99853647 | KD2-H4K8ac_peak_8175 | 14.66631 | UBAC2-AS1_ENSG00000228889;UBAC2_ENSG00000134882  |
| 13 | 99964041  | 99964280 | KD2-H4K8ac_peak_8176 | 6.99815  |                                                  |
| 13 | 99964893  | 99965399 | KD2-H4K8ac_peak_8177 | 5.88845  |                                                  |
| 13 | 100150092 | 1E+08    | KD2-H4K8ac_peak_8178 | 10.72656 |                                                  |
| 13 | 100151139 | 1E+08    | KD2-H4K8ac_peak_8179 | 7.27716  |                                                  |
| 13 | 100153812 | 1E+08    | KD2-H4K8ac_peak_8180 | 5.30799  | LINC00449_ENSG00000203441;TM9SF2_ENSG00000125304 |
| 13 | 100258996 | 1E+08    | KD2-H4K8ac_peak_8181 | 18.5703  | CLYBL_ENSG00000125246                            |
| 13 | 100547680 | 1.01E+08 | KD2-H4K8ac_peak_8182 | 4.37708  |                                                  |
| 13 | 100740525 | 1.01E+08 | KD2-H4K8ac_peak_8183 | 5.57044  | PCCA_ENSG00000175198                             |
| 13 | 101199744 | 1.01E+08 | KD2-H4K8ac_peak_8184 | 6.0073   |                                                  |
| 13 | 101240662 | 1.01E+08 | KD2-H4K8ac_peak_8185 | 14.56955 | GGACT_ENSG00000134864                            |
| 13 | 101326749 | 1.01E+08 | KD2-H4K8ac_peak_8186 | 12.13241 | TMTC4_ENSG00000125247                            |

|    |           |          |                      |          |                                                     |
|----|-----------|----------|----------------------|----------|-----------------------------------------------------|
| 13 | 102068997 | 1.02E+08 | KD2-H4K8ac_peak_8187 | 7.12754  | NALCN_ENSG00000102452                               |
| 13 | 102970420 | 1.03E+08 | KD2-H4K8ac_peak_8188 | 4.86324  |                                                     |
| 13 | 103046417 | 1.03E+08 | KD2-H4K8ac_peak_8189 | 16.09057 | FGF14-IT1_ENSG00000243319;FGF14-AS2_ENSG00000272143 |
| 13 | 103052542 | 1.03E+08 | KD2-H4K8ac_peak_8190 | 7.76104  | FGF14_ENSG00000102466                               |
| 13 | 103244527 | 1.03E+08 | KD2-H4K8ac_peak_8191 | 10.0692  |                                                     |
| 13 | 103248718 | 1.03E+08 | KD2-H4K8ac_peak_8192 | 16.57619 | TPP2_ENSG00000134900                                |
| 13 | 103249522 | 1.03E+08 | KD2-H4K8ac_peak_8193 | 5.1628   | TPP2_ENSG00000134900                                |
| 13 | 103426301 | 1.03E+08 | KD2-H4K8ac_peak_8194 | 10.31695 | TEX30_ENSG00000151287                               |
| 13 | 103451556 | 1.03E+08 | KD2-H4K8ac_peak_8195 | 6.66359  | KDELC1_ENSG00000134901;BIVM_ENSG00000134897         |
| 13 | 103497305 | 1.03E+08 | KD2-H4K8ac_peak_8196 | 9.73431  | ERCC5_ENSG00000134899                               |
| 13 | 104618151 | 1.05E+08 | KD2-H4K8ac_peak_8197 | 10.0692  |                                                     |
| 13 | 104657916 | 1.05E+08 | KD2-H4K8ac_peak_8198 | 7.12754  |                                                     |
| 13 | 104659716 | 1.05E+08 | KD2-H4K8ac_peak_8199 | 7.27716  |                                                     |
| 13 | 105135747 | 1.05E+08 | KD2-H4K8ac_peak_8200 | 7.27716  |                                                     |
| 13 | 105925295 | 1.06E+08 | KD2-H4K8ac_peak_8201 | 14.45402 |                                                     |
| 13 | 106589402 | 1.07E+08 | KD2-H4K8ac_peak_8202 | 4.37708  |                                                     |
| 13 | 107186658 | 1.07E+08 | KD2-H4K8ac_peak_8203 | 9.72244  | EFNB2_ENSG00000125266                               |
| 13 | 107187546 | 1.07E+08 | KD2-H4K8ac_peak_8204 | 6.56211  | EFNB2_ENSG00000125266                               |
| 13 | 107219842 | 1.07E+08 | KD2-H4K8ac_peak_8205 | 11.89502 |                                                     |
| 13 | 107570034 | 1.08E+08 | KD2-H4K8ac_peak_8206 | 22.21127 |                                                     |
| 13 | 107572090 | 1.08E+08 | KD2-H4K8ac_peak_8207 | 6.40683  |                                                     |
| 13 | 107823401 | 1.08E+08 | KD2-H4K8ac_peak_8208 | 7.12754  |                                                     |
| 13 | 108029401 | 1.08E+08 | KD2-H4K8ac_peak_8209 | 6.25869  |                                                     |
| 13 | 108518560 | 1.09E+08 | KD2-H4K8ac_peak_8210 | 4.77079  | FAM155A_ENSG00000204442                             |
| 13 | 108519251 | 1.09E+08 | KD2-H4K8ac_peak_8211 | 9.36516  | FAM155A_ENSG00000204442                             |
| 13 | 108520116 | 1.09E+08 | KD2-H4K8ac_peak_8212 | 4.76709  |                                                     |
| 13 | 108869918 | 1.09E+08 | KD2-H4K8ac_peak_8213 | 6.55628  | LIG4_ENSG00000174405;ABHD13_ENSG00000139826         |
| 13 | 109792873 | 1.1E+08  | KD2-H4K8ac_peak_8214 | 8.09113  |                                                     |
| 13 | 109798870 | 1.1E+08  | KD2-H4K8ac_peak_8215 | 8.09113  |                                                     |
| 13 | 109986761 | 1.1E+08  | KD2-H4K8ac_peak_8216 | 8.2413   |                                                     |
| 13 | 109994368 | 1.1E+08  | KD2-H4K8ac_peak_8217 | 11.30637 |                                                     |
| 13 | 109996957 | 1.1E+08  | KD2-H4K8ac_peak_8218 | 13.81781 |                                                     |
| 13 | 109998245 | 1.1E+08  | KD2-H4K8ac_peak_8219 | 22.21127 |                                                     |
| 13 | 110008321 | 1.1E+08  | KD2-H4K8ac_peak_8220 | 5.45396  |                                                     |
| 13 | 110013500 | 1.1E+08  | KD2-H4K8ac_peak_8221 | 6.40683  |                                                     |
| 13 | 110015798 | 1.1E+08  | KD2-H4K8ac_peak_8222 | 5.57044  |                                                     |
| 13 | 110021616 | 1.1E+08  | KD2-H4K8ac_peak_8223 | 6.65673  |                                                     |
| 13 | 110294993 | 1.1E+08  | KD2-H4K8ac_peak_8224 | 5.16439  |                                                     |
| 13 | 110318800 | 1.1E+08  | KD2-H4K8ac_peak_8225 | 9.8758   |                                                     |
| 13 | 110321344 | 1.1E+08  | KD2-H4K8ac_peak_8226 | 7.76104  |                                                     |
| 13 | 110322302 | 1.1E+08  | KD2-H4K8ac_peak_8227 | 12.84642 |                                                     |
| 13 | 110352151 | 1.1E+08  | KD2-H4K8ac_peak_8228 | 6.36375  |                                                     |
| 13 | 110396319 | 1.1E+08  | KD2-H4K8ac_peak_8229 | 3.97079  |                                                     |
| 13 | 110433953 | 1.1E+08  | KD2-H4K8ac_peak_8230 | 18.7894  |                                                     |
| 13 | 110436671 | 1.1E+08  | KD2-H4K8ac_peak_8231 | 11.35142 |                                                     |
| 13 | 110439498 | 1.1E+08  | KD2-H4K8ac_peak_8232 | 5.54647  | IRS2_ENSG00000185950                                |

|    |           |          |                      |          |                                                     |
|----|-----------|----------|----------------------|----------|-----------------------------------------------------|
| 13 | 110521708 | 1.11E+08 | KD2-H4K8ac_peak_8233 | 3.75035  |                                                     |
| 13 | 110791065 | 1.11E+08 | KD2-H4K8ac_peak_8234 | 6.25869  |                                                     |
| 13 | 110918261 | 1.11E+08 | KD2-H4K8ac_peak_8235 | 10.0692  |                                                     |
| 13 | 110959019 | 1.11E+08 | KD2-H4K8ac_peak_8236 | 18.51132 | COL4A1_ENSG00000187498;COL4A2_ENSG00000134871       |
| 13 | 111024029 | 1.11E+08 | KD2-H4K8ac_peak_8237 | 9.08816  |                                                     |
| 13 | 111118747 | 1.11E+08 | KD2-H4K8ac_peak_8238 | 9.76452  |                                                     |
| 13 | 111214279 | 1.11E+08 | KD2-H4K8ac_peak_8239 | 7.27716  | RAB20_ENSG00000139832                               |
| 13 | 111267147 | 1.11E+08 | KD2-H4K8ac_peak_8240 | 11.04256 | CARKD_ENSG00000213995                               |
| 13 | 111267977 | 1.11E+08 | KD2-H4K8ac_peak_8241 | 15.53798 | CARKD_ENSG00000213995                               |
| 13 | 111280545 | 1.11E+08 | KD2-H4K8ac_peak_8242 | 6.66692  |                                                     |
| 13 | 111358074 | 1.11E+08 | KD2-H4K8ac_peak_8243 | 10.0692  |                                                     |
| 13 | 111358609 | 1.11E+08 | KD2-H4K8ac_peak_8244 | 10.19949 |                                                     |
| 13 | 111364187 | 1.11E+08 | KD2-H4K8ac_peak_8245 | 7.86151  | ING1_ENSG00000153487                                |
| 13 | 111364895 | 1.11E+08 | KD2-H4K8ac_peak_8246 | 31.533   | CARS2_ENSG00000134905;ING1_ENSG00000153487          |
| 13 | 111365623 | 1.11E+08 | KD2-H4K8ac_peak_8247 | 10.96455 | CARS2_ENSG00000134905;ING1_ENSG00000153487          |
| 13 | 111566540 | 1.12E+08 | KD2-H4K8ac_peak_8248 | 11.09936 | ANKRD10_ENSG00000088448                             |
| 13 | 111568068 | 1.12E+08 | KD2-H4K8ac_peak_8249 | 8.30974  | ANKRD10_ENSG00000088448                             |
| 13 | 111767585 | 1.12E+08 | KD2-H4K8ac_peak_8250 | 4.67342  | ARHGEF7-AS2_ENSG00000235875;ARHGEF7_ENSG00000102606 |
| 13 | 111768306 | 1.12E+08 | KD2-H4K8ac_peak_8251 | 8.17902  | ARHGEF7-AS2_ENSG00000235875                         |
| 13 | 111805533 | 1.12E+08 | KD2-H4K8ac_peak_8252 | 12.82393 |                                                     |
| 13 | 111806082 | 1.12E+08 | KD2-H4K8ac_peak_8253 | 10.46264 |                                                     |
| 13 | 113184736 | 1.13E+08 | KD2-H4K8ac_peak_8254 | 8.37043  |                                                     |
| 13 | 113187380 | 1.13E+08 | KD2-H4K8ac_peak_8255 | 20.50833 |                                                     |
| 13 | 113242020 | 1.13E+08 | KD2-H4K8ac_peak_8256 | 17.55491 | TUBGCP3_ENSG00000126216                             |
| 13 | 113343817 | 1.13E+08 | KD2-H4K8ac_peak_8257 | 10.98959 | ATP11A_ENSG00000068650                              |
| 13 | 113344465 | 1.13E+08 | KD2-H4K8ac_peak_8258 | 5.13615  | ATP11A_ENSG00000068650                              |
| 13 | 113547859 | 1.14E+08 | KD2-H4K8ac_peak_8259 | 8.62963  | MCF2L_ENSG00000126217                               |
| 13 | 113548270 | 1.14E+08 | KD2-H4K8ac_peak_8260 | 6.66692  | MCF2L_ENSG00000126217                               |
| 13 | 113623177 | 1.14E+08 | KD2-H4K8ac_peak_8261 | 5.30799  | MCF2L-AS1_ENSG00000235280                           |
| 13 | 113656032 | 1.14E+08 | KD2-H4K8ac_peak_8262 | 18.25771 |                                                     |
| 13 | 113776186 | 1.14E+08 | KD2-H4K8ac_peak_8263 | 10.05606 | F10_ENSG00000126218                                 |
| 13 | 113777148 | 1.14E+08 | KD2-H4K8ac_peak_8264 | 15.5861  | F10_ENSG00000126218                                 |
| 13 | 113807667 | 1.14E+08 | KD2-H4K8ac_peak_8265 | 9.8758   |                                                     |
| 13 | 113862592 | 1.14E+08 | KD2-H4K8ac_peak_8266 | 17.70889 | PCID2_ENSG00000126226;CUL4A_ENSG00000139842         |
| 13 | 113864012 | 1.14E+08 | KD2-H4K8ac_peak_8267 | 15.04693 | PCID2_ENSG00000126226                               |
| 13 | 113868881 | 1.14E+08 | KD2-H4K8ac_peak_8268 | 5.21139  |                                                     |
| 13 | 113950573 | 1.14E+08 | KD2-H4K8ac_peak_8269 | 6.25869  | LAMP1_ENSG00000185896                               |
| 13 | 113950969 | 1.14E+08 | KD2-H4K8ac_peak_8270 | 22.06226 | LAMP1_ENSG00000185896                               |
| 13 | 113951633 | 1.14E+08 | KD2-H4K8ac_peak_8271 | 9.20193  | LAMP1_ENSG00000185896                               |
| 13 | 114017761 | 1.14E+08 | KD2-H4K8ac_peak_8272 | 9.36516  | GRTP1_ENSG00000139835                               |
| 13 | 114018800 | 1.14E+08 | KD2-H4K8ac_peak_8273 | 8.33649  | GRTP1_ENSG00000139835                               |
| 13 | 114048547 | 1.14E+08 | KD2-H4K8ac_peak_8274 | 7.76329  |                                                     |
| 13 | 114061930 | 1.14E+08 | KD2-H4K8ac_peak_8275 | 17.28876 |                                                     |
| 13 | 114075924 | 1.14E+08 | KD2-H4K8ac_peak_8276 | 4.42765  |                                                     |
| 13 | 114076831 | 1.14E+08 | KD2-H4K8ac_peak_8277 | 6.40683  |                                                     |
| 13 | 114145376 | 1.14E+08 | KD2-H4K8ac_peak_8278 | 9.20193  | DCUN1D2_ENSG00000150401;TMCO3_ENSG00000150403       |



|    |           |          |                      |          |                                                  |
|----|-----------|----------|----------------------|----------|--------------------------------------------------|
| 13 | 114198285 | 1.14E+08 | KD2-H4K8ac_peak_8279 | 18.94636 |                                                  |
| 13 | 114199979 | 1.14E+08 | KD2-H4K8ac_peak_8280 | 9.11031  |                                                  |
| 13 | 114239176 | 1.14E+08 | KD2-H4K8ac_peak_8281 | 9.06369  | TFDP1_ENSG00000198176                            |
| 13 | 114273826 | 1.14E+08 | KD2-H4K8ac_peak_8282 | 9.16531  |                                                  |
| 13 | 114312302 | 1.14E+08 | KD2-H4K8ac_peak_8283 | 7.70289  | ATP4B_ENSG00000186009                            |
| 13 | 114429578 | 1.14E+08 | KD2-H4K8ac_peak_8284 | 8.55271  |                                                  |
| 13 | 114445256 | 1.14E+08 | KD2-H4K8ac_peak_8285 | 7.22457  |                                                  |
| 13 | 114461770 | 1.14E+08 | KD2-H4K8ac_peak_8286 | 12.08081 | TMEM255B_ENSG00000184497                         |
| 13 | 114504509 | 1.15E+08 | KD2-H4K8ac_peak_8287 | 10.7186  |                                                  |
| 13 | 114523618 | 1.15E+08 | KD2-H4K8ac_peak_8288 | 9.96941  |                                                  |
| 13 | 114524863 | 1.15E+08 | KD2-H4K8ac_peak_8289 | 7.69287  |                                                  |
| 13 | 114540456 | 1.15E+08 | KD2-H4K8ac_peak_8290 | 6.52179  |                                                  |
| 13 | 114564461 | 1.15E+08 | KD2-H4K8ac_peak_8291 | 9.6261   |                                                  |
| 13 | 114566101 | 1.15E+08 | KD2-H4K8ac_peak_8292 | 8.85813  | GAS6_ENSG00000183087;GAS6-AS2_ENSG00000272695    |
| 13 | 114566676 | 1.15E+08 | KD2-H4K8ac_peak_8293 | 14.00658 | GAS6_ENSG00000183087;GAS6-AS2_ENSG00000272695    |
| 13 | 114638041 | 1.15E+08 | KD2-H4K8ac_peak_8294 | 5.43522  |                                                  |
| 13 | 114829033 | 1.15E+08 | KD2-H4K8ac_peak_8295 | 8.7325   |                                                  |
| 13 | 114829602 | 1.15E+08 | KD2-H4K8ac_peak_8296 | 14.27217 |                                                  |
| 13 | 114830712 | 1.15E+08 | KD2-H4K8ac_peak_8297 | 16.822   |                                                  |
| 13 | 114844323 | 1.15E+08 | KD2-H4K8ac_peak_8298 | 7.1181   |                                                  |
| 13 | 114863310 | 1.15E+08 | KD2-H4K8ac_peak_8299 | 9.1707   |                                                  |
| 13 | 114864128 | 1.15E+08 | KD2-H4K8ac_peak_8300 | 4.01115  |                                                  |
| 13 | 114864821 | 1.15E+08 | KD2-H4K8ac_peak_8301 | 11.6141  |                                                  |
| 13 | 114875154 | 1.15E+08 | KD2-H4K8ac_peak_8302 | 7.89389  | RASA3-IT1_ENSG00000232487                        |
| 13 | 114898172 | 1.15E+08 | KD2-H4K8ac_peak_8303 | 8.79106  | RASA3_ENSG00000185989                            |
| 13 | 114999929 | 1.15E+08 | KD2-H4K8ac_peak_8304 | 14.8083  | CDC16_ENSG00000130177                            |
| 13 | 115046490 | 1.15E+08 | KD2-H4K8ac_peak_8305 | 7.73264  | UPF3A_ENSG00000169062                            |
| 13 | 115079548 | 1.15E+08 | KD2-H4K8ac_peak_8306 | 6.45083  | CHAMP1_ENSG00000198824                           |
| 13 | 115080024 | 1.15E+08 | KD2-H4K8ac_peak_8307 | 9.63487  | CHAMP1_ENSG00000198824                           |
| 14 | 20801069  | 20801364 | KD2-H4K8ac_peak_8308 | 6.40683  | CCNB1IP1_ENSG00000100814                         |
| 14 | 20810723  | 20811026 | KD2-H4K8ac_peak_8309 | 3.75035  | RPPH1_ENSG00000259001;PARP2_ENSG00000129484      |
| 14 | 20922751  | 20922956 | KD2-H4K8ac_peak_8310 | 5.4779   | OSGEP_ENSG00000092094;APEX1_ENSG00000100823      |
| 14 | 20929135  | 20929562 | KD2-H4K8ac_peak_8311 | 11.30637 | TMEM55B_ENSG00000165782                          |
| 14 | 20930197  | 20930396 | KD2-H4K8ac_peak_8312 | 7.40111  | TMEM55B_ENSG00000165782                          |
| 14 | 20937686  | 20938034 | KD2-H4K8ac_peak_8313 | 4.56666  | PNP_ENSG00000198805                              |
| 14 | 21150045  | 21150885 | KD2-H4K8ac_peak_8314 | 18.5703  |                                                  |
| 14 | 21151087  | 21151309 | KD2-H4K8ac_peak_8315 | 12.93209 | RNASE4_ENSG00000258818                           |
| 14 | 21458198  | 21458515 | KD2-H4K8ac_peak_8316 | 6.40297  | METTL17_ENSG00000165792                          |
| 14 | 21492714  | 21493157 | KD2-H4K8ac_peak_8317 | 13.9234  | TPPP2_ENSG00000179636;AL161668.5_ENSG00000258604 |
| 14 | 21493613  | 21493838 | KD2-H4K8ac_peak_8318 | 4.67342  |                                                  |
| 14 | 21536913  | 21538191 | KD2-H4K8ac_peak_8319 | 11.79585 | NDRG2_ENSG00000165795;ARHGEF40_ENSG00000165801   |
| 14 | 21538594  | 21538940 | KD2-H4K8ac_peak_8320 | 4.211    | NDRG2_ENSG00000165795;ARHGEF40_ENSG00000165801   |
| 14 | 21539265  | 21539712 | KD2-H4K8ac_peak_8321 | 9.65086  | NDRG2_ENSG00000165795;ARHGEF40_ENSG00000165801   |
| 14 | 21565665  | 21567333 | KD2-H4K8ac_peak_8322 | 10.86378 | TMEM253_ENSG00000232070                          |
| 14 | 21571307  | 21571660 | KD2-H4K8ac_peak_8323 | 9.51625  |                                                  |
| 14 | 21575265  | 21575489 | KD2-H4K8ac_peak_8324 | 7.167    | RP11-998D10.4_ENSG00000178107                    |

|    |          |          |                      |          |                                                                                 |
|----|----------|----------|----------------------|----------|---------------------------------------------------------------------------------|
| 14 | 21659337 | 21659547 | KD2-H4K8ac_peak_8325 | 4.37708  |                                                                                 |
| 14 | 21660133 | 21660575 | KD2-H4K8ac_peak_8326 | 7.36799  |                                                                                 |
| 14 | 21738099 | 21738960 | KD2-H4K8ac_peak_8327 | 11.89502 | HNRNPC_ENSG00000092199                                                          |
| 14 | 21769307 | 21769615 | KD2-H4K8ac_peak_8328 | 4.06758  |                                                                                 |
| 14 | 21851586 | 21851955 | KD2-H4K8ac_peak_8329 | 10.96455 | SUPT16H_ENSG00000092201;RP11-524O1.4_ENSG00000260830                            |
| 14 | 21852693 | 21852901 | KD2-H4K8ac_peak_8330 | 6.25869  | SUPT16H_ENSG00000092201;RP11-524O1.4_ENSG00000260830                            |
| 14 | 21945434 | 21945638 | KD2-H4K8ac_peak_8331 | 5.82799  | RAB2B_ENSG00000129472;TOX4_ENSG00000092203                                      |
| 14 | 21979067 | 21979286 | KD2-H4K8ac_peak_8332 | 8.10216  | METTL3_ENSG00000165819                                                          |
| 14 | 21979861 | 21980133 | KD2-H4K8ac_peak_8333 | 12.00273 | METTL3_ENSG00000165819                                                          |
| 14 | 21993521 | 21993759 | KD2-H4K8ac_peak_8334 | 4.77079  |                                                                                 |
| 14 | 23026084 | 23026454 | KD2-H4K8ac_peak_8335 | 5.9696   | AE000662.93_ENSG00000259054;AE000662.92_ENSG00000259003                         |
| 14 | 23235936 | 23236595 | KD2-H4K8ac_peak_8336 | 9.36516  | CTD-2555K7.2_ENSG00000258458;OXA1L_ENSG00000155463                              |
| 14 | 23291559 | 23291756 | KD2-H4K8ac_peak_8337 | 5.57044  | AL135998.1_ENSG00000215306                                                      |
| 14 | 23298191 | 23298911 | KD2-H4K8ac_peak_8338 | 13.81781 | MRPL52_ENSG00000172590;SLC7A7_ENSG00000155465                                   |
| 14 | 23299136 | 23299552 | KD2-H4K8ac_peak_8339 | 9.4551   | MRPL52_ENSG00000172590;SLC7A7_ENSG00000155465                                   |
| 14 | 23317972 | 23318622 | KD2-H4K8ac_peak_8340 | 7.67504  |                                                                                 |
| 14 | 23322077 | 23322318 | KD2-H4K8ac_peak_8341 | 5.57044  | Y_RNA_ENSG00000212335                                                           |
| 14 | 23341119 | 23341594 | KD2-H4K8ac_peak_8342 | 8.23274  | LRP10_ENSG00000197324                                                           |
| 14 | 23355822 | 23356499 | KD2-H4K8ac_peak_8343 | 16.53429 |                                                                                 |
| 14 | 23357272 | 23357512 | KD2-H4K8ac_peak_8344 | 5.54647  |                                                                                 |
| 14 | 23387864 | 23388286 | KD2-H4K8ac_peak_8345 | 7.07117  | RBM23_ENSG00000100461;PRMT5-AS1_ENSG00000237054                                 |
| 14 | 23399851 | 23400233 | KD2-H4K8ac_peak_8346 | 9.96798  |                                                                                 |
| 14 | 23426125 | 23426794 | KD2-H4K8ac_peak_8347 | 8.85813  | HAUS4_ENSG00000092036;MIR4707_ENSG00000265037                                   |
| 14 | 23451409 | 23452114 | KD2-H4K8ac_peak_8348 | 6.84261  | RP11-298I3.5_ENSG00000259132;AJUBA_ENSG00000129474;RP11-298I3.4_ENSG00000258457 |
| 14 | 23475992 | 23476233 | KD2-H4K8ac_peak_8349 | 4.84794  |                                                                                 |
| 14 | 23479401 | 23479666 | KD2-H4K8ac_peak_8350 | 6.22239  | C14orf93_ENSG00000100802                                                        |
| 14 | 23503723 | 23504418 | KD2-H4K8ac_peak_8351 | 8.4716   | PSMB5_ENSG00000100804;AL132780.1_ENSG00000207765                                |
| 14 | 23505064 | 23505348 | KD2-H4K8ac_peak_8352 | 6.31143  | PSMB5_ENSG00000100804                                                           |
| 14 | 23526994 | 23527197 | KD2-H4K8ac_peak_8353 | 4.67342  | CDH24_ENSG00000139880                                                           |
| 14 | 23563910 | 23564303 | KD2-H4K8ac_peak_8354 | 25.32841 | ACIN1_ENSG00000100813;C14orf119_ENSG00000179933                                 |
| 14 | 23564756 | 23565006 | KD2-H4K8ac_peak_8355 | 6.30229  | ACIN1_ENSG00000100813;C14orf119_ENSG00000179933                                 |
| 14 | 23755655 | 23756032 | KD2-H4K8ac_peak_8356 | 4.86324  |                                                                                 |
| 14 | 23764032 | 23764266 | KD2-H4K8ac_peak_8357 | 7.79898  | RP11-124D2.7_ENSG00000270433                                                    |
| 14 | 23770568 | 23770778 | KD2-H4K8ac_peak_8358 | 9.95119  |                                                                                 |
| 14 | 23776096 | 23776560 | KD2-H4K8ac_peak_8359 | 5.01002  | BCL2L2-PABPN1_ENSG00000258643                                                   |
| 14 | 23789724 | 23790157 | KD2-H4K8ac_peak_8360 | 12.84642 | PABPN1_ENSG00000100836                                                          |
| 14 | 23790718 | 23791326 | KD2-H4K8ac_peak_8361 | 8.4716   | AL049829.1_ENSG00000268702;PABPN1_ENSG00000100836                               |
| 14 | 23820912 | 23821165 | KD2-H4K8ac_peak_8362 | 4.86324  | SLC22A17_ENSG00000092096                                                        |
| 14 | 23821776 | 23821999 | KD2-H4K8ac_peak_8363 | 6.66692  | SLC22A17_ENSG00000092096                                                        |
| 14 | 23822529 | 23822763 | KD2-H4K8ac_peak_8364 | 7.47462  | SLC22A17_ENSG00000092096                                                        |
| 14 | 23833285 | 23835517 | KD2-H4K8ac_peak_8365 | 11.58876 | EFS_ENSG00000100842                                                             |
| 14 | 23835791 | 23836334 | KD2-H4K8ac_peak_8366 | 9.20193  | EFS_ENSG00000100842                                                             |
| 14 | 23938096 | 23938447 | KD2-H4K8ac_peak_8367 | 5.14125  | NGDN_ENSG00000129460                                                            |
| 14 | 23981358 | 23981689 | KD2-H4K8ac_peak_8368 | 17.43705 | RP11-66N24.4_ENSG00000157306                                                    |
| 14 | 24008139 | 24008335 | KD2-H4K8ac_peak_8369 | 4.37708  |                                                                                 |
| 14 | 24020863 | 24021439 | KD2-H4K8ac_peak_8370 | 9.11031  |                                                                                 |

|    |          |          |                      |          |                                                                        |
|----|----------|----------|----------------------|----------|------------------------------------------------------------------------|
| 14 | 24024983 | 24025962 | KD2-H4K8ac_peak_8371 | 12.93209 | ZFH2_ENSG00000136367;THTPA_ENSG00000259431                             |
| 14 | 24031586 | 24031822 | KD2-H4K8ac_peak_8372 | 5.11586  |                                                                        |
| 14 | 24036783 | 24037171 | KD2-H4K8ac_peak_8373 | 13.70753 | AP1G2_ENSG00000213983                                                  |
| 14 | 24058586 | 24059171 | KD2-H4K8ac_peak_8374 | 12.26331 |                                                                        |
| 14 | 24422638 | 24423382 | KD2-H4K8ac_peak_8375 | 10.7186  | DHRS4_ENSG00000157326                                                  |
| 14 | 24438705 | 24438924 | KD2-H4K8ac_peak_8376 | 9.15329  | DHRS4L2_ENSG00000187630                                                |
| 14 | 24475810 | 24476757 | KD2-H4K8ac_peak_8377 | 19.43192 |                                                                        |
| 14 | 24505328 | 24506040 | KD2-H4K8ac_peak_8378 | 9.63487  | RP11-468E2.9_ENSG00000225766                                           |
| 14 | 24520700 | 24522040 | KD2-H4K8ac_peak_8379 | 5.85291  | LRRC16B_ENSG00000186648                                                |
| 14 | 24550168 | 24551140 | KD2-H4K8ac_peak_8380 | 12.57865 |                                                                        |
| 14 | 24562622 | 24563108 | KD2-H4K8ac_peak_8381 | 11.92978 | PCK2_ENSG00000100889                                                   |
| 14 | 24563567 | 24564054 | KD2-H4K8ac_peak_8382 | 7.146    | PCK2_ENSG00000100889                                                   |
| 14 | 24582706 | 24583153 | KD2-H4K8ac_peak_8383 | 6.65673  | DCAF11_ENSG00000100897                                                 |
| 14 | 24604807 | 24605131 | KD2-H4K8ac_peak_8384 | 10.0692  | PSME1_ENSG00000092010                                                  |
| 14 | 24605416 | 24605789 | KD2-H4K8ac_peak_8385 | 10.16972 | PSME1_ENSG00000092010                                                  |
| 14 | 24616168 | 24616452 | KD2-H4K8ac_peak_8386 | 20.29027 | PSME2_ENSG00000100911;RNF31_ENSG00000092098                            |
| 14 | 24630664 | 24630974 | KD2-H4K8ac_peak_8387 | 7.70289  | IRF9_ENSG00000213928                                                   |
| 14 | 24640583 | 24640912 | KD2-H4K8ac_peak_8388 | 3.97079  | REC8_ENSG00000100918                                                   |
| 14 | 24657691 | 24657891 | KD2-H4K8ac_peak_8389 | 11.09936 | IPO4_ENSG00000196497                                                   |
| 14 | 24664111 | 24665344 | KD2-H4K8ac_peak_8390 | 11.50346 |                                                                        |
| 14 | 24682142 | 24682597 | KD2-H4K8ac_peak_8391 | 6.30229  | TM9SF1_ENSG00000100926;TM9SF1_ENSG00000254692;CHMP4A_ENSG00000254505   |
| 14 | 24684864 | 24685103 | KD2-H4K8ac_peak_8392 | 6.76298  | AL136419.6_ENSG00000260669;MDP1_ENSG00000213920                        |
| 14 | 24701149 | 24701444 | KD2-H4K8ac_peak_8393 | 13.13965 | NEDD8-MDP1_ENSG00000255526;NEDD8_ENSG00000129559;GMPR2_ENSG00000100938 |
| 14 | 24701809 | 24702677 | KD2-H4K8ac_peak_8394 | 14.8083  | NEDD8-MDP1_ENSG00000255526;NEDD8_ENSG00000129559;GMPR2_ENSG00000100938 |
| 14 | 24712354 | 24712921 | KD2-H4K8ac_peak_8395 | 6.25869  | TINF2_ENSG00000092330                                                  |
| 14 | 24739975 | 24740714 | KD2-H4K8ac_peak_8396 | 22.77389 | RABGGTA_ENSG00000100949                                                |
| 14 | 24740931 | 24741277 | KD2-H4K8ac_peak_8397 | 5.59859  | RABGGTA_ENSG00000100949                                                |
| 14 | 24768601 | 24769257 | KD2-H4K8ac_peak_8398 | 8.53092  | DHRS1_ENSG00000157379;NOP9_ENSG00000196943                             |
| 14 | 24801636 | 24801953 | KD2-H4K8ac_peak_8399 | 5.13615  |                                                                        |
| 14 | 24835796 | 24836419 | KD2-H4K8ac_peak_8400 | 5.14125  | NFATC4_ENSG00000100968                                                 |
| 14 | 24836702 | 24837098 | KD2-H4K8ac_peak_8401 | 26.85324 |                                                                        |
| 14 | 24837884 | 24838867 | KD2-H4K8ac_peak_8402 | 17.45005 |                                                                        |
| 14 | 24868193 | 24868649 | KD2-H4K8ac_peak_8403 | 7.36799  | NYNRIN_ENSG00000205978                                                 |
| 14 | 24869111 | 24869421 | KD2-H4K8ac_peak_8404 | 4.42765  |                                                                        |
| 14 | 24898089 | 24898519 | KD2-H4K8ac_peak_8405 | 4.33139  | KHNYN_ENSG00000100441                                                  |
| 14 | 24898891 | 24899692 | KD2-H4K8ac_peak_8406 | 10.29842 | CBLN3_ENSG00000139899;KHNYN_ENSG00000100441                            |
| 14 | 24911647 | 24911888 | KD2-H4K8ac_peak_8407 | 7.38799  | SDR39U1_ENSG00000100445                                                |
| 14 | 24912246 | 24912698 | KD2-H4K8ac_peak_8408 | 8.37231  | SDR39U1_ENSG00000100445                                                |
| 14 | 27104190 | 27104485 | KD2-H4K8ac_peak_8409 | 6.56926  |                                                                        |
| 14 | 31027836 | 31028743 | KD2-H4K8ac_peak_8410 | 9.1707   | G2E3_ENSG00000092140                                                   |
| 14 | 31090574 | 31090842 | KD2-H4K8ac_peak_8411 | 5.71749  | SCFD1_ENSG00000092108                                                  |
| 14 | 31343051 | 31344491 | KD2-H4K8ac_peak_8412 | 15.58442 | COCH_ENSG00000100473                                                   |
| 14 | 31494698 | 31495565 | KD2-H4K8ac_peak_8413 | 23.52296 | STRN3_ENSG00000196792;AP4S1_ENSG00000100478                            |
| 14 | 31676093 | 31676937 | KD2-H4K8ac_peak_8414 | 15.039   | HECTD1_ENSG00000092148                                                 |
| 14 | 31677168 | 31677698 | KD2-H4K8ac_peak_8415 | 9.1707   | HECTD1_ENSG00000092148                                                 |
| 14 | 31677970 | 31678241 | KD2-H4K8ac_peak_8416 | 9.11031  | HECTD1_ENSG00000092148                                                 |

|    |          |          |                      |          |                                                                                              |
|----|----------|----------|----------------------|----------|----------------------------------------------------------------------------------------------|
| 14 | 31926035 | 31926572 | KD2-H4K8ac_peak_8417 | 14.8083  | RP11-176H8.1_ENSG00000203546;DTD2_ENSG00000129480                                            |
| 14 | 32030627 | 32030893 | KD2-H4K8ac_peak_8418 | 16.73922 | CTD-2213F21.3_ENSG00000257155                                                                |
| 14 | 32420064 | 32420314 | KD2-H4K8ac_peak_8419 | 5.72327  |                                                                                              |
| 14 | 32420811 | 32421067 | KD2-H4K8ac_peak_8420 | 3.90565  |                                                                                              |
| 14 | 32546571 | 32546861 | KD2-H4K8ac_peak_8421 | 5.9696   | ARHGAP5-AS1_ENSG00000258655                                                                  |
| 14 | 32724330 | 32724706 | KD2-H4K8ac_peak_8422 | 5.88845  |                                                                                              |
| 14 | 32897515 | 32897728 | KD2-H4K8ac_peak_8423 | 4.86324  |                                                                                              |
| 14 | 34407374 | 34407740 | KD2-H4K8ac_peak_8424 | 6.25869  |                                                                                              |
| 14 | 34429034 | 34429266 | KD2-H4K8ac_peak_8425 | 12.06346 |                                                                                              |
| 14 | 34529390 | 34529969 | KD2-H4K8ac_peak_8426 | 12.82393 |                                                                                              |
| 14 | 34930926 | 34931390 | KD2-H4K8ac_peak_8427 | 6.66692  | SPTSSA_ENSG00000165389                                                                       |
| 14 | 35009078 | 35009582 | KD2-H4K8ac_peak_8428 | 18.25771 | EAPP_ENSG00000129518                                                                         |
| 14 | 35098891 | 35099681 | KD2-H4K8ac_peak_8429 | 14.98671 | SNX6_ENSG00000129515                                                                         |
| 14 | 35183501 | 35184071 | KD2-H4K8ac_peak_8430 | 9.95119  | CFL2_ENSG00000165410                                                                         |
| 14 | 35191831 | 35192168 | KD2-H4K8ac_peak_8431 | 6.51023  |                                                                                              |
| 14 | 35342903 | 35344424 | KD2-H4K8ac_peak_8432 | 17.38513 | BAZ1A_ENSG00000198604;RP11-73E17.2_ENSG00000258738                                           |
| 14 | 35515625 | 35516055 | KD2-H4K8ac_peak_8433 | 7.13615  |                                                                                              |
| 14 | 35591253 | 35592094 | KD2-H4K8ac_peak_8434 | 11.90231 | PPP2R3C_ENSG00000092020;KIAA0391_ENSG00000100890;KIAA0391_ENSG00000258790                    |
| 14 | 35760333 | 35760968 | KD2-H4K8ac_peak_8435 | 8.1718   | AL121594.1_ENSG00000265530                                                                   |
| 14 | 35761624 | 35762018 | KD2-H4K8ac_peak_8436 | 21.09577 | AL121594.1_ENSG00000265530                                                                   |
| 14 | 35802747 | 35802981 | KD2-H4K8ac_peak_8437 | 10.08707 |                                                                                              |
| 14 | 35811079 | 35811642 | KD2-H4K8ac_peak_8438 | 7.36799  |                                                                                              |
| 14 | 35845848 | 35846049 | KD2-H4K8ac_peak_8439 | 8.1233   |                                                                                              |
| 14 | 35854093 | 35854307 | KD2-H4K8ac_peak_8440 | 6.1846   |                                                                                              |
| 14 | 35873395 | 35874466 | KD2-H4K8ac_peak_8441 | 16.3889  | NFKBIA_ENSG00000100906                                                                       |
| 14 | 36002573 | 36003122 | KD2-H4K8ac_peak_8442 | 8.55271  | INSM2_ENSG00000168348                                                                        |
| 14 | 36003438 | 36005075 | KD2-H4K8ac_peak_8443 | 13.81781 | INSM2_ENSG00000168348                                                                        |
| 14 | 36012920 | 36013119 | KD2-H4K8ac_peak_8444 | 7.12754  |                                                                                              |
| 14 | 36030082 | 36030354 | KD2-H4K8ac_peak_8445 | 9.15329  |                                                                                              |
| 14 | 36040773 | 36041035 | KD2-H4K8ac_peak_8446 | 5.15777  |                                                                                              |
| 14 | 36789572 | 36789815 | KD2-H4K8ac_peak_8447 | 10.05606 | MBIP_ENSG00000151332                                                                         |
| 14 | 39643639 | 39644143 | KD2-H4K8ac_peak_8448 | 10.21502 | RP11-407N17.4_ENSG00000259083;PNN_ENSG00000100941                                            |
| 14 | 39736301 | 39736587 | KD2-H4K8ac_peak_8449 | 11.05407 | RP11-407N17.5_ENSG00000258940                                                                |
| 14 | 39901421 | 39901640 | KD2-H4K8ac_peak_8450 | 8.1718   | FBXO33_ENSG00000165355                                                                       |
| 14 | 39901942 | 39902152 | KD2-H4K8ac_peak_8451 | 7.01964  | FBXO33_ENSG00000165355                                                                       |
| 14 | 45381349 | 45381703 | KD2-H4K8ac_peak_8452 | 11.30637 | RP11-857B24.5_ENSG00000258949                                                                |
| 14 | 45603203 | 45603590 | KD2-H4K8ac_peak_8453 | 5.25071  | FKBP3_ENSG00000100442                                                                        |
| 14 | 50052823 | 50053070 | KD2-H4K8ac_peak_8454 | 10.05606 | RN7SL1_ENSG00000258486                                                                       |
| 14 | 50065142 | 50065905 | KD2-H4K8ac_peak_8455 | 12.27142 | RPS29_ENSG00000213741;AL139099.1_ENSG00000253459;LRR1_ENSG00000165501;RHOQP1_ENSG00000258568 |
| 14 | 50066305 | 50066656 | KD2-H4K8ac_peak_8456 | 3.87414  | RPS29_ENSG00000213741;AL139099.1_ENSG00000253459;LRR1_ENSG00000165501;RHOQP1_ENSG00000258568 |
| 14 | 50100317 | 50101039 | KD2-H4K8ac_peak_8457 | 11.24702 | DNAAF2_ENSG00000165506                                                                       |
| 14 | 50101245 | 50101479 | KD2-H4K8ac_peak_8458 | 7.36799  | DNAAF2_ENSG00000165506                                                                       |
| 14 | 50154689 | 50155361 | KD2-H4K8ac_peak_8459 | 22.62254 | POLE2_ENSG00000100479                                                                        |
| 14 | 50159539 | 50160128 | KD2-H4K8ac_peak_8460 | 18.5703  | KLHDC1_ENSG00000197776                                                                       |
| 14 | 50233497 | 50233855 | KD2-H4K8ac_peak_8461 | 7.47462  | KLHDC2_ENSG00000165516                                                                       |
| 14 | 50234108 | 50234540 | KD2-H4K8ac_peak_8462 | 11.70879 | KLHDC2_ENSG00000165516                                                                       |

|    |          |          |                      |          |                                              |
|----|----------|----------|----------------------|----------|----------------------------------------------|
| 14 | 50234904 | 50235560 | KD2-H4K8ac_peak_8463 | 13.36684 | KLHDC2_ENSG00000165516                       |
| 14 | 50319070 | 50319597 | KD2-H4K8ac_peak_8464 | 13.56049 | NEMF_ENSG00000165525                         |
| 14 | 50319848 | 50320480 | KD2-H4K8ac_peak_8465 | 8.59579  | NEMF_ENSG00000165525;RN7SL3_ENSG00000266037  |
| 14 | 50359356 | 50359552 | KD2-H4K8ac_peak_8466 | 8.85813  | ARF6_ENSG00000165527                         |
| 14 | 50359876 | 50360238 | KD2-H4K8ac_peak_8467 | 11.83301 | ARF6_ENSG00000165527                         |
| 14 | 50469854 | 50470476 | KD2-H4K8ac_peak_8468 | 14.48084 |                                              |
| 14 | 50527638 | 50528138 | KD2-H4K8ac_peak_8469 | 12.25733 |                                              |
| 14 | 50528912 | 50529561 | KD2-H4K8ac_peak_8470 | 10.19949 |                                              |
| 14 | 50697937 | 50698493 | KD2-H4K8ac_peak_8471 | 9.65086  | SOS2_ENSG00000100485                         |
| 14 | 50698728 | 50699095 | KD2-H4K8ac_peak_8472 | 4.86324  | SOS2_ENSG00000100485                         |
| 14 | 50778649 | 50778867 | KD2-H4K8ac_peak_8473 | 9.63487  | L2HGDH_ENSG00000087299;ATP5S_ENSG00000125375 |
| 14 | 50779459 | 50779728 | KD2-H4K8ac_peak_8474 | 6.25869  | L2HGDH_ENSG00000087299;ATP5S_ENSG00000125375 |
| 14 | 50863253 | 50864047 | KD2-H4K8ac_peak_8475 | 10.43145 | RP11-247L20.3_ENSG00000258857                |
| 14 | 50999022 | 50999312 | KD2-H4K8ac_peak_8476 | 11.60333 | ATL1_ENSG00000198513                         |
| 14 | 50999529 | 50999747 | KD2-H4K8ac_peak_8477 | 5.88845  | ATL1_ENSG00000198513                         |
| 14 | 51026992 | 51027904 | KD2-H4K8ac_peak_8478 | 13.9234  | MAP4K5_ENSG00000012983                       |
| 14 | 51134750 | 51134966 | KD2-H4K8ac_peak_8479 | 8.4716   | SAV1_ENSG00000151748                         |
| 14 | 51297531 | 51298367 | KD2-H4K8ac_peak_8480 | 19.9503  | NIN_ENSG00000100503                          |
| 14 | 51326846 | 51327136 | KD2-H4K8ac_peak_8481 | 17.43705 |                                              |
| 14 | 51338773 | 51339153 | KD2-H4K8ac_peak_8482 | 6.66692  | ABHD12B_ENSG00000131969                      |
| 14 | 51422063 | 51422416 | KD2-H4K8ac_peak_8483 | 8.1233   |                                              |
| 14 | 51467305 | 51467546 | KD2-H4K8ac_peak_8484 | 5.25071  |                                              |
| 14 | 51560198 | 51560421 | KD2-H4K8ac_peak_8485 | 5.73839  |                                              |
| 14 | 51561994 | 51562393 | KD2-H4K8ac_peak_8486 | 18.41184 | TRIM9_ENSG00000100505                        |
| 14 | 51562619 | 51562834 | KD2-H4K8ac_peak_8487 | 5.14125  | TRIM9_ENSG00000100505                        |
| 14 | 51695137 | 51695356 | KD2-H4K8ac_peak_8488 | 7.22457  |                                              |
| 14 | 51707033 | 51707407 | KD2-H4K8ac_peak_8489 | 6.25869  | TMX1_ENSG00000139921                         |
| 14 | 51861101 | 51861785 | KD2-H4K8ac_peak_8490 | 7.40111  |                                              |
| 14 | 51863864 | 51864067 | KD2-H4K8ac_peak_8491 | 6.0073   | RP11-255G12.3_ENSG00000258808                |
| 14 | 52117958 | 52118366 | KD2-H4K8ac_peak_8492 | 16.07006 |                                              |
| 14 | 52326774 | 52327248 | KD2-H4K8ac_peak_8493 | 10.99365 |                                              |
| 14 | 52455243 | 52456059 | KD2-H4K8ac_peak_8494 | 10.02417 | C14orf166_ENSG00000087302                    |
| 14 | 52456324 | 52456601 | KD2-H4K8ac_peak_8495 | 15.61313 | C14orf166_ENSG00000087302                    |
| 14 | 52536045 | 52536263 | KD2-H4K8ac_peak_8496 | 7.50083  | NID2_ENSG00000087303                         |
| 14 | 53161743 | 53162492 | KD2-H4K8ac_peak_8497 | 11.79585 | ERO1L_ENSG00000197930                        |
| 14 | 53163242 | 53163453 | KD2-H4K8ac_peak_8498 | 4.04247  | ERO1L_ENSG00000197930                        |
| 14 | 53163766 | 53163983 | KD2-H4K8ac_peak_8499 | 6.16888  |                                              |
| 14 | 53172800 | 53173067 | KD2-H4K8ac_peak_8500 | 15.9336  | PSMC6_ENSG00000100519                        |
| 14 | 53173998 | 53174262 | KD2-H4K8ac_peak_8501 | 7.96322  | PSMC6_ENSG00000100519                        |
| 14 | 53257754 | 53258125 | KD2-H4K8ac_peak_8502 | 5.13615  | GNPNAT1_ENSG00000100522                      |
| 14 | 53297199 | 53297631 | KD2-H4K8ac_peak_8503 | 6.54442  |                                              |
| 14 | 53299398 | 53299609 | KD2-H4K8ac_peak_8504 | 6.61376  |                                              |
| 14 | 53302334 | 53303016 | KD2-H4K8ac_peak_8505 | 13.13969 |                                              |
| 14 | 53320668 | 53320900 | KD2-H4K8ac_peak_8506 | 6.64891  |                                              |
| 14 | 53417487 | 53417693 | KD2-H4K8ac_peak_8507 | 8.28234  |                                              |
| 14 | 53418151 | 53418903 | KD2-H4K8ac_peak_8508 | 8.85813  | FERMT2_ENSG00000073712                       |

|    |          |          |                      |          |                                                                                |
|----|----------|----------|----------------------|----------|--------------------------------------------------------------------------------|
| 14 | 53445579 | 53445813 | KD2-H4K8ac_peak_8509 | 9.27888  |                                                                                |
| 14 | 53454593 | 53454848 | KD2-H4K8ac_peak_8510 | 4.86324  |                                                                                |
| 14 | 53461747 | 53462017 | KD2-H4K8ac_peak_8511 | 4.37708  |                                                                                |
| 14 | 53618938 | 53619299 | KD2-H4K8ac_peak_8512 | 5.14125  | DDHD1_ENSG00000100523;AL356020.1_ENSG00000266552;RP11-547D23.1_ENSG00000258731 |
| 14 | 53619624 | 53619904 | KD2-H4K8ac_peak_8513 | 9.402    | DDHD1_ENSG00000100523;AL356020.1_ENSG00000266552;RP11-547D23.1_ENSG00000258731 |
| 14 | 53620123 | 53620505 | KD2-H4K8ac_peak_8514 | 10.65724 | DDHD1_ENSG00000100523;AL356020.1_ENSG00000266552;RP11-547D23.1_ENSG00000258731 |
| 14 | 54655232 | 54655691 | KD2-H4K8ac_peak_8515 | 8.00457  |                                                                                |
| 14 | 54689952 | 54690450 | KD2-H4K8ac_peak_8516 | 8.45238  |                                                                                |
| 14 | 54809956 | 54810296 | KD2-H4K8ac_peak_8517 | 11.03331 |                                                                                |
| 14 | 54811195 | 54811683 | KD2-H4K8ac_peak_8518 | 8.79106  |                                                                                |
| 14 | 54814230 | 54814691 | KD2-H4K8ac_peak_8519 | 6.8836   |                                                                                |
| 14 | 54863052 | 54863402 | KD2-H4K8ac_peak_8520 | 14.45402 | CDKN3_ENSG00000100526                                                          |
| 14 | 54863918 | 54864141 | KD2-H4K8ac_peak_8521 | 6.65673  | CDKN3_ENSG00000100526                                                          |
| 14 | 54907617 | 54907975 | KD2-H4K8ac_peak_8522 | 8.34752  | CNIH1_ENSG00000100528                                                          |
| 14 | 54955045 | 54955666 | KD2-H4K8ac_peak_8523 | 9.1707   | GMFB_ENSG00000197045                                                           |
| 14 | 54956368 | 54956575 | KD2-H4K8ac_peak_8524 | 4.06758  | GMFB_ENSG00000197045                                                           |
| 14 | 54976696 | 54977019 | KD2-H4K8ac_peak_8525 | 9.36516  | CGRRF1_ENSG00000100532                                                         |
| 14 | 55031973 | 55032495 | KD2-H4K8ac_peak_8526 | 9.34989  |                                                                                |
| 14 | 55032864 | 55033677 | KD2-H4K8ac_peak_8527 | 12.06346 | SAMD4A_ENSG00000020577                                                         |
| 14 | 55033969 | 55034299 | KD2-H4K8ac_peak_8528 | 6.98292  | SAMD4A_ENSG00000020577                                                         |
| 14 | 55227020 | 55227215 | KD2-H4K8ac_peak_8529 | 5.88845  |                                                                                |
| 14 | 55251622 | 55251921 | KD2-H4K8ac_peak_8530 | 4.9025   |                                                                                |
| 14 | 55252138 | 55252571 | KD2-H4K8ac_peak_8531 | 4.211    |                                                                                |
| 14 | 55274303 | 55275098 | KD2-H4K8ac_peak_8532 | 13.73635 |                                                                                |
| 14 | 55275611 | 55276372 | KD2-H4K8ac_peak_8533 | 6.25869  |                                                                                |
| 14 | 55283820 | 55284241 | KD2-H4K8ac_peak_8534 | 11.05407 |                                                                                |
| 14 | 55284576 | 55285320 | KD2-H4K8ac_peak_8535 | 10.29842 |                                                                                |
| 14 | 55286033 | 55286932 | KD2-H4K8ac_peak_8536 | 20.08519 |                                                                                |
| 14 | 55287322 | 55287635 | KD2-H4K8ac_peak_8537 | 6.56926  |                                                                                |
| 14 | 55303414 | 55303740 | KD2-H4K8ac_peak_8538 | 6.91644  |                                                                                |
| 14 | 55344475 | 55344725 | KD2-H4K8ac_peak_8539 | 4.8888   | MIR4308_ENSG00000265432                                                        |
| 14 | 55346421 | 55346625 | KD2-H4K8ac_peak_8540 | 7.26029  |                                                                                |
| 14 | 55349796 | 55349999 | KD2-H4K8ac_peak_8541 | 6.33462  |                                                                                |
| 14 | 55350373 | 55350599 | KD2-H4K8ac_peak_8542 | 8.17902  |                                                                                |
| 14 | 55352378 | 55352626 | KD2-H4K8ac_peak_8543 | 5.53033  | FDPS3_ENSG00000258872                                                          |
| 14 | 55355569 | 55355988 | KD2-H4K8ac_peak_8544 | 6.66692  |                                                                                |
| 14 | 55389211 | 55389507 | KD2-H4K8ac_peak_8545 | 10.21502 |                                                                                |
| 14 | 55390015 | 55390410 | KD2-H4K8ac_peak_8546 | 8.1233   |                                                                                |
| 14 | 55494042 | 55494309 | KD2-H4K8ac_peak_8547 | 7.76329  | WDHD1_ENSG00000198554;SOCS4_ENSG00000180008                                    |
| 14 | 55517640 | 55518153 | KD2-H4K8ac_peak_8548 | 11.86082 | MAPK1IP1L_ENSG00000168175                                                      |
| 14 | 55518497 | 55518724 | KD2-H4K8ac_peak_8549 | 6.65673  | MAPK1IP1L_ENSG00000168175                                                      |
| 14 | 55540971 | 55541615 | KD2-H4K8ac_peak_8550 | 8.00457  |                                                                                |
| 14 | 55558531 | 55559165 | KD2-H4K8ac_peak_8551 | 12.09025 |                                                                                |
| 14 | 55559714 | 55560019 | KD2-H4K8ac_peak_8552 | 8.74596  |                                                                                |
| 14 | 55568472 | 55568766 | KD2-H4K8ac_peak_8553 | 5.57044  |                                                                                |
| 14 | 55595656 | 55595887 | KD2-H4K8ac_peak_8554 | 6.99815  |                                                                                |

|    |          |          |                      |          |                                                         |
|----|----------|----------|----------------------|----------|---------------------------------------------------------|
| 14 | 55596262 | 55596576 | KD2-H4K8ac_peak_8555 | 10.19949 |                                                         |
| 14 | 55738181 | 55738784 | KD2-H4K8ac_peak_8556 | 8.55271  | RP11-665C16.6_ENSG00000258413;FBXO34_ENSG00000178974    |
| 14 | 55877969 | 55879038 | KD2-H4K8ac_peak_8557 | 14.56955 | ATG14_ENSG00000126775                                   |
| 14 | 55921663 | 55922033 | KD2-H4K8ac_peak_8558 | 7.40633  |                                                         |
| 14 | 56046575 | 56046799 | KD2-H4K8ac_peak_8559 | 12.80176 | KTN1-AS1_ENSG00000186615                                |
| 14 | 56047385 | 56047582 | KD2-H4K8ac_peak_8560 | 10.96455 | KTN1-AS1_ENSG00000186615                                |
| 14 | 57046308 | 57046509 | KD2-H4K8ac_peak_8561 | 8.55271  |                                                         |
| 14 | 57734902 | 57735617 | KD2-H4K8ac_peak_8562 | 14.45402 | EXOC5_ENSG00000070367;AP5M1_ENSG00000053770             |
| 14 | 57735924 | 57736235 | KD2-H4K8ac_peak_8563 | 4.86324  | EXOC5_ENSG00000070367;AP5M1_ENSG00000053770             |
| 14 | 57810349 | 57810716 | KD2-H4K8ac_peak_8564 | 6.16888  |                                                         |
| 14 | 57856592 | 57857137 | KD2-H4K8ac_peak_8565 | 7.76329  | NAA30_ENSG00000139977                                   |
| 14 | 57857336 | 57857780 | KD2-H4K8ac_peak_8566 | 6.60096  | NAA30_ENSG00000139977                                   |
| 14 | 58618383 | 58618803 | KD2-H4K8ac_peak_8567 | 6.40683  |                                                         |
| 14 | 58666376 | 58667207 | KD2-H4K8ac_peak_8568 | 10.96455 | ACTR10_ENSG00000131966                                  |
| 14 | 58711776 | 58712005 | KD2-H4K8ac_peak_8569 | 6.25869  | PSMA3_ENSG00000100567                                   |
| 14 | 58766069 | 58766264 | KD2-H4K8ac_peak_8570 | 7.76329  | ARID4A_ENSG00000032219                                  |
| 14 | 58862248 | 58863237 | KD2-H4K8ac_peak_8571 | 28.94181 | RP11-517O13.3_ENSG00000258658;TOMM20L_ENSG00000196860   |
| 14 | 58893481 | 58893872 | KD2-H4K8ac_peak_8572 | 18.1686  | TIMM9_ENSG00000100575;KIAA0586_ENSG00000100578          |
| 14 | 59104859 | 59105133 | KD2-H4K8ac_peak_8573 | 3.90565  |                                                         |
| 14 | 59931211 | 59932042 | KD2-H4K8ac_peak_8574 | 4.67342  | GPR135_ENSG00000181619                                  |
| 14 | 59950641 | 59950957 | KD2-H4K8ac_peak_8575 | 8.79106  | L3HYPDH_ENSG00000126790;JKAMP_ENSG00000050130           |
| 14 | 59951283 | 59951507 | KD2-H4K8ac_peak_8576 | 13.59098 | L3HYPDH_ENSG00000126790;JKAMP_ENSG00000050130           |
| 14 | 60097158 | 60097616 | KD2-H4K8ac_peak_8577 | 4.67342  |                                                         |
| 14 | 60337206 | 60338022 | KD2-H4K8ac_peak_8578 | 8.10216  | RTN1_ENSG00000139970                                    |
| 14 | 60386243 | 60386903 | KD2-H4K8ac_peak_8579 | 4.67342  | RP11-62H20.1_ENSG00000261120;LRRC9_ENSG00000131951      |
| 14 | 60558248 | 60558468 | KD2-H4K8ac_peak_8580 | 10.46264 | RP11-16B13.1_ENSG00000258553;PCNXL4_ENSG00000126773     |
| 14 | 60558738 | 60559223 | KD2-H4K8ac_peak_8581 | 4.44527  | RP11-16B13.1_ENSG00000258553;PCNXL4_ENSG00000126773     |
| 14 | 60631734 | 60632220 | KD2-H4K8ac_peak_8582 | 9.89383  |                                                         |
| 14 | 60715453 | 60715745 | KD2-H4K8ac_peak_8583 | 20.31556 | CTD-2184C24.2_ENSG00000254718                           |
| 14 | 60716156 | 60716398 | KD2-H4K8ac_peak_8584 | 5.30799  | CTD-2184C24.2_ENSG00000254718                           |
| 14 | 60778569 | 60778775 | KD2-H4K8ac_peak_8585 | 8.02571  |                                                         |
| 14 | 60779889 | 60780146 | KD2-H4K8ac_peak_8586 | 8.00457  |                                                         |
| 14 | 60822271 | 60822529 | KD2-H4K8ac_peak_8587 | 6.16888  |                                                         |
| 14 | 60824447 | 60824693 | KD2-H4K8ac_peak_8588 | 6.16888  |                                                         |
| 14 | 60825220 | 60825632 | KD2-H4K8ac_peak_8589 | 7.12754  |                                                         |
| 14 | 60981064 | 60981647 | KD2-H4K8ac_peak_8590 | 6.25869  | C14orf39_ENSG00000179008;RP11-1042B17.3_ENSG00000258670 |
| 14 | 60981897 | 60982201 | KD2-H4K8ac_peak_8591 | 11.60333 | C14orf39_ENSG00000179008;RP11-1042B17.3_ENSG00000258670 |
| 14 | 61092413 | 61092637 | KD2-H4K8ac_peak_8592 | 6.25869  |                                                         |
| 14 | 61104094 | 61104389 | KD2-H4K8ac_peak_8593 | 4.06758  |                                                         |
| 14 | 61123133 | 61124616 | KD2-H4K8ac_peak_8594 | 12.84642 | SIX1_ENSG00000126778                                    |
| 14 | 61190302 | 61190842 | KD2-H4K8ac_peak_8595 | 6.99815  | SIX4_ENSG00000100625                                    |
| 14 | 61447524 | 61447722 | KD2-H4K8ac_peak_8596 | 9.16531  | TRMT5_ENSG00000126814;SLC38A6_ENSG00000139974           |
| 14 | 61718900 | 61719327 | KD2-H4K8ac_peak_8597 | 6.03693  |                                                         |
| 14 | 61736562 | 61736804 | KD2-H4K8ac_peak_8598 | 7.79558  |                                                         |
| 14 | 61747104 | 61747880 | KD2-H4K8ac_peak_8599 | 9.34195  | TMEM30B_ENSG00000182107                                 |
| 14 | 61787854 | 61788722 | KD2-H4K8ac_peak_8600 | 9.63487  | RP11-902B17.1_ENSG00000247287                           |

|    |          |          |                      |          |                                                       |
|----|----------|----------|----------------------|----------|-------------------------------------------------------|
| 14 | 61934056 | 61934467 | KD2-H4K8ac_peak_8601 | 7.62364  |                                                       |
| 14 | 61935723 | 61936302 | KD2-H4K8ac_peak_8602 | 6.39197  |                                                       |
| 14 | 61936498 | 61938641 | KD2-H4K8ac_peak_8603 | 6.40297  |                                                       |
| 14 | 61939260 | 61940553 | KD2-H4K8ac_peak_8604 | 8.30974  |                                                       |
| 14 | 61942734 | 61943175 | KD2-H4K8ac_peak_8605 | 9.50015  |                                                       |
| 14 | 61944561 | 61944772 | KD2-H4K8ac_peak_8606 | 6.99815  |                                                       |
| 14 | 61946507 | 61946921 | KD2-H4K8ac_peak_8607 | 4.70388  |                                                       |
| 14 | 61950327 | 61950684 | KD2-H4K8ac_peak_8608 | 6.40683  |                                                       |
| 14 | 62043000 | 62043348 | KD2-H4K8ac_peak_8609 | 4.86324  |                                                       |
| 14 | 62043655 | 62044120 | KD2-H4K8ac_peak_8610 | 8.19585  |                                                       |
| 14 | 62050783 | 62051015 | KD2-H4K8ac_peak_8611 | 6.27931  |                                                       |
| 14 | 62052403 | 62052927 | KD2-H4K8ac_peak_8612 | 5.82799  |                                                       |
| 14 | 62053634 | 62053866 | KD2-H4K8ac_peak_8613 | 7.52168  |                                                       |
| 14 | 62074589 | 62075062 | KD2-H4K8ac_peak_8614 | 5.59859  |                                                       |
| 14 | 62077225 | 62077421 | KD2-H4K8ac_peak_8615 | 6.40683  |                                                       |
| 14 | 62162302 | 62163088 | KD2-H4K8ac_peak_8616 | 13.35993 | HIF1A-AS1_ENSG00000258777;HIF1A_ENSG00000100644       |
| 14 | 62278812 | 62279086 | KD2-H4K8ac_peak_8617 | 7.47462  | CTD-2277K2.1_ENSG00000258882                          |
| 14 | 62279507 | 62280022 | KD2-H4K8ac_peak_8618 | 12.82393 | CTD-2277K2.1_ENSG00000258882                          |
| 14 | 63989435 | 63990033 | KD2-H4K8ac_peak_8619 | 10.96455 |                                                       |
| 14 | 63993645 | 63993871 | KD2-H4K8ac_peak_8620 | 4.01115  |                                                       |
| 14 | 64009644 | 64010021 | KD2-H4K8ac_peak_8621 | 10.96455 | PPP2R5E_ENSG00000154001;CTD-2302E22.4_ENSG00000261242 |
| 14 | 64010358 | 64010688 | KD2-H4K8ac_peak_8622 | 10.0692  | PPP2R5E_ENSG00000154001;CTD-2302E22.4_ENSG00000261242 |
| 14 | 64108092 | 64108533 | KD2-H4K8ac_peak_8623 | 9.89126  | WDR89_ENSG00000140006                                 |
| 14 | 64194495 | 64194718 | KD2-H4K8ac_peak_8624 | 5.9696   | SGPP1_ENSG00000126821                                 |
| 14 | 64319805 | 64320553 | KD2-H4K8ac_peak_8625 | 11.05407 | SYNE2_ENSG00000054654                                 |
| 14 | 64760715 | 64761135 | KD2-H4K8ac_peak_8626 | 11.05407 |                                                       |
| 14 | 64804703 | 64805256 | KD2-H4K8ac_peak_8627 | 6.65673  | ESR2_ENSG00000140009;RP11-544I20.2_ENSG00000214770    |
| 14 | 64805779 | 64806085 | KD2-H4K8ac_peak_8628 | 11.92978 | ESR2_ENSG00000140009;RP11-544I20.2_ENSG00000214770    |
| 14 | 64806417 | 64806754 | KD2-H4K8ac_peak_8629 | 9.16531  |                                                       |
| 14 | 64854066 | 64854606 | KD2-H4K8ac_peak_8630 | 10.20046 | MTHFD1_ENSG00000100714                                |
| 14 | 64932181 | 64932487 | KD2-H4K8ac_peak_8631 | 10.96455 | AKAP5_ENSG00000179841                                 |
| 14 | 64967465 | 64967708 | KD2-H4K8ac_peak_8632 | 8.17902  |                                                       |
| 14 | 64970003 | 64970330 | KD2-H4K8ac_peak_8633 | 9.20193  | ZBTB1_ENSG00000126804                                 |
| 14 | 64970710 | 64971940 | KD2-H4K8ac_peak_8634 | 17.70837 | ZBTB25_ENSG00000089775;ZBTB1_ENSG00000126804          |
| 14 | 65006078 | 65006665 | KD2-H4K8ac_peak_8635 | 9.95119  | RP11-973N13.4_ENSG00000259116                         |
| 14 | 65007452 | 65007798 | KD2-H4K8ac_peak_8636 | 10.87093 | RP11-973N13.4_ENSG00000259116                         |
| 14 | 65016632 | 65016890 | KD2-H4K8ac_peak_8637 | 9.36516  | PPP1R36_ENSG00000165807                               |
| 14 | 65103062 | 65103419 | KD2-H4K8ac_peak_8638 | 7.36799  |                                                       |
| 14 | 65152666 | 65152881 | KD2-H4K8ac_peak_8639 | 5.53095  |                                                       |
| 14 | 65170791 | 65171684 | KD2-H4K8ac_peak_8640 | 11.24702 | PLEKHG3_ENSG00000126822                               |
| 14 | 65224929 | 65225247 | KD2-H4K8ac_peak_8641 | 10.69383 |                                                       |
| 14 | 65229772 | 65230176 | KD2-H4K8ac_peak_8642 | 11.05467 |                                                       |
| 14 | 65230598 | 65231033 | KD2-H4K8ac_peak_8643 | 8.30974  |                                                       |
| 14 | 65231281 | 65231637 | KD2-H4K8ac_peak_8644 | 12.00273 |                                                       |
| 14 | 65290467 | 65290685 | KD2-H4K8ac_peak_8645 | 3.97079  |                                                       |
| 14 | 65346407 | 65346943 | KD2-H4K8ac_peak_8646 | 4.86324  | SPTB_ENSG00000070182                                  |



|    |          |          |                      |          |                                                                         |
|----|----------|----------|----------------------|----------|-------------------------------------------------------------------------|
| 14 | 65380787 | 65381553 | KD2-H4K8ac_peak_8647 | 19.94588 | CHURC1_ENSG00000258289;FNTB_ENSG00000257365;CHURC1-FNTB_ENSG00000125954 |
| 14 | 65438411 | 65438982 | KD2-H4K8ac_peak_8648 | 7.07117  | RAB15_ENSG00000139998                                                   |
| 14 | 65439189 | 65439745 | KD2-H4K8ac_peak_8649 | 12.08081 | RAB15_ENSG00000139998                                                   |
| 14 | 65454073 | 65454307 | KD2-H4K8ac_peak_8650 | 5.13615  |                                                                         |
| 14 | 65569604 | 65570170 | KD2-H4K8ac_peak_8651 | 8.1233   | MAX_ENSG00000125952                                                     |
| 14 | 65665119 | 65665382 | KD2-H4K8ac_peak_8652 | 5.25071  |                                                                         |
| 14 | 65682135 | 65682478 | KD2-H4K8ac_peak_8653 | 3.87414  |                                                                         |
| 14 | 65696325 | 65696713 | KD2-H4K8ac_peak_8654 | 11.05467 |                                                                         |
| 14 | 65878653 | 65879198 | KD2-H4K8ac_peak_8655 | 8.10216  |                                                                         |
| 14 | 65937108 | 65937353 | KD2-H4K8ac_peak_8656 | 4.42765  | MIR625_ENSG00000207781                                                  |
| 14 | 66257229 | 66257440 | KD2-H4K8ac_peak_8657 | 6.25014  |                                                                         |
| 14 | 66700663 | 66701078 | KD2-H4K8ac_peak_8658 | 8.79557  |                                                                         |
| 14 | 66974240 | 66975163 | KD2-H4K8ac_peak_8659 | 16.58076 | RP11-72M17.1_ENSG00000258561;GPHN_ENSG00000171723                       |
| 14 | 67826133 | 67826448 | KD2-H4K8ac_peak_8660 | 5.88845  | ATP6V1D_ENSG00000100554;EIF2S1_ENSG00000134001                          |
| 14 | 67878479 | 67879214 | KD2-H4K8ac_peak_8661 | 9.1707   | PLEK2_ENSG00000100558                                                   |
| 14 | 67999536 | 68000469 | KD2-H4K8ac_peak_8662 | 17.8868  | TMEM229B_ENSG00000198133;PLEKHH1_ENSG00000054690                        |
| 14 | 68067148 | 68067669 | KD2-H4K8ac_peak_8663 | 7.59794  | PIGH_ENSG00000100564                                                    |
| 14 | 68141082 | 68142204 | KD2-H4K8ac_peak_8664 | 12.30509 | VTI1B_ENSG00000100568                                                   |
| 14 | 68162038 | 68162401 | KD2-H4K8ac_peak_8665 | 13.80019 | RDH11_ENSG00000072042                                                   |
| 14 | 68162781 | 68163091 | KD2-H4K8ac_peak_8666 | 5.57044  | RDH11_ENSG00000072042                                                   |
| 14 | 68283069 | 68283269 | KD2-H4K8ac_peak_8667 | 10.43145 | ZFYVE26_ENSG00000072121                                                 |
| 14 | 68283880 | 68284466 | KD2-H4K8ac_peak_8668 | 7.51935  | ZFYVE26_ENSG00000072121                                                 |
| 14 | 68285806 | 68286136 | KD2-H4K8ac_peak_8669 | 13.62729 | RAD51B_ENSG00000182185                                                  |
| 14 | 68286605 | 68286858 | KD2-H4K8ac_peak_8670 | 4.86324  | RAD51B_ENSG00000182185                                                  |
| 14 | 69005991 | 69006230 | KD2-H4K8ac_peak_8671 | 6.16888  |                                                                         |
| 14 | 69052480 | 69053173 | KD2-H4K8ac_peak_8672 | 7.0754   |                                                                         |
| 14 | 69101207 | 69101441 | KD2-H4K8ac_peak_8673 | 10.39154 |                                                                         |
| 14 | 69121301 | 69121911 | KD2-H4K8ac_peak_8674 | 19.41056 |                                                                         |
| 14 | 69122190 | 69122849 | KD2-H4K8ac_peak_8675 | 8.26945  |                                                                         |
| 14 | 69155444 | 69155648 | KD2-H4K8ac_peak_8676 | 5.43522  |                                                                         |
| 14 | 69156026 | 69156479 | KD2-H4K8ac_peak_8677 | 8.17902  |                                                                         |
| 14 | 69157344 | 69157605 | KD2-H4K8ac_peak_8678 | 9.19305  |                                                                         |
| 14 | 69253943 | 69254239 | KD2-H4K8ac_peak_8679 | 6.16888  |                                                                         |
| 14 | 69262102 | 69263188 | KD2-H4K8ac_peak_8680 | 9.01262  | ZFP36L1_ENSG00000185650                                                 |
| 14 | 69273375 | 69274361 | KD2-H4K8ac_peak_8681 | 13.56967 |                                                                         |
| 14 | 69282673 | 69283566 | KD2-H4K8ac_peak_8682 | 13.80019 |                                                                         |
| 14 | 69291203 | 69291746 | KD2-H4K8ac_peak_8683 | 15.52826 |                                                                         |
| 14 | 69291990 | 69292259 | KD2-H4K8ac_peak_8684 | 6.91644  |                                                                         |
| 14 | 69316218 | 69316487 | KD2-H4K8ac_peak_8685 | 9.15329  |                                                                         |
| 14 | 69404335 | 69404676 | KD2-H4K8ac_peak_8686 | 12.51591 |                                                                         |
| 14 | 69405753 | 69406268 | KD2-H4K8ac_peak_8687 | 4.42765  |                                                                         |
| 14 | 69418705 | 69419106 | KD2-H4K8ac_peak_8688 | 5.73016  |                                                                         |
| 14 | 69443874 | 69444241 | KD2-H4K8ac_peak_8689 | 4.49003  |                                                                         |
| 14 | 69446264 | 69446486 | KD2-H4K8ac_peak_8690 | 14.38358 | ACTN1_ENSG00000072110;ACTN1-AS1_ENSG00000259062                         |
| 14 | 69480889 | 69481232 | KD2-H4K8ac_peak_8691 | 6.0073   |                                                                         |
| 14 | 69505599 | 69505842 | KD2-H4K8ac_peak_8692 | 8.5092   |                                                                         |

|    |          |          |                      |          |                                                                                |
|----|----------|----------|----------------------|----------|--------------------------------------------------------------------------------|
| 14 | 69618502 | 69619084 | KD2-H4K8ac_peak_8693 | 9.95119  | DCAF5_ENSG00000139990                                                          |
| 14 | 69620026 | 69620508 | KD2-H4K8ac_peak_8694 | 11.50346 | DCAF5_ENSG00000139990                                                          |
| 14 | 69658226 | 69658840 | KD2-H4K8ac_peak_8695 | 11.24702 | EXD2_ENSG00000081177                                                           |
| 14 | 69726236 | 69726749 | KD2-H4K8ac_peak_8696 | 8.79106  | RP11-363J20.2_ENSG00000258520;GALNT16_ENSG00000100626                          |
| 14 | 69727429 | 69727632 | KD2-H4K8ac_peak_8697 | 4.39858  | RP11-363J20.2_ENSG00000258520                                                  |
| 14 | 69754338 | 69754747 | KD2-H4K8ac_peak_8698 | 8.26945  |                                                                                |
| 14 | 69759024 | 69759235 | KD2-H4K8ac_peak_8699 | 5.57044  |                                                                                |
| 14 | 69780033 | 69780260 | KD2-H4K8ac_peak_8700 | 7.12754  |                                                                                |
| 14 | 69864448 | 69864944 | KD2-H4K8ac_peak_8701 | 9.20193  | ERH_ENSG00000100632;SLC39A9_ENSG00000029364                                    |
| 14 | 69865708 | 69865955 | KD2-H4K8ac_peak_8702 | 5.57044  | ERH_ENSG00000100632;SLC39A9_ENSG00000029364                                    |
| 14 | 69967033 | 69967686 | KD2-H4K8ac_peak_8703 | 8.94469  |                                                                                |
| 14 | 69972451 | 69972670 | KD2-H4K8ac_peak_8704 | 10.65724 |                                                                                |
| 14 | 70026201 | 70026512 | KD2-H4K8ac_peak_8705 | 6.56926  |                                                                                |
| 14 | 70078501 | 70078795 | KD2-H4K8ac_peak_8706 | 6.66692  | KIAA0247_ENSG00000100647                                                       |
| 14 | 70159841 | 70160053 | KD2-H4K8ac_peak_8707 | 5.88845  |                                                                                |
| 14 | 70178595 | 70178886 | KD2-H4K8ac_peak_8708 | 4.86324  |                                                                                |
| 14 | 70193456 | 70194155 | KD2-H4K8ac_peak_8709 | 12.84642 | SRSF5_ENSG00000100650                                                          |
| 14 | 70233899 | 70234369 | KD2-H4K8ac_peak_8710 | 16.53429 |                                                                                |
| 14 | 70561923 | 70562409 | KD2-H4K8ac_peak_8711 | 7.95563  |                                                                                |
| 14 | 70562680 | 70562890 | KD2-H4K8ac_peak_8712 | 6.56211  |                                                                                |
| 14 | 70653379 | 70653865 | KD2-H4K8ac_peak_8713 | 6.66692  | RP11-486O13.2_ENSG00000258422                                                  |
| 14 | 70721251 | 70721562 | KD2-H4K8ac_peak_8714 | 7.76329  |                                                                                |
| 14 | 70826055 | 70827070 | KD2-H4K8ac_peak_8715 | 13.92307 | COX16_ENSG00000133983;RNU2-51P_ENSG00000222640                                 |
| 14 | 71066929 | 71067192 | KD2-H4K8ac_peak_8716 | 6.16888  | MED6_ENSG00000133997                                                           |
| 14 | 71067697 | 71068322 | KD2-H4K8ac_peak_8717 | 9.15329  | MED6_ENSG00000133997                                                           |
| 14 | 71108110 | 71109120 | KD2-H4K8ac_peak_8718 | 14.15075 | CTD-2540L5.5_ENSG00000259115;CTD-2540L5.6_ENSG00000245466;TTC9_ENSG00000133985 |
| 14 | 71288497 | 71288891 | KD2-H4K8ac_peak_8719 | 8.30974  |                                                                                |
| 14 | 71374304 | 71374939 | KD2-H4K8ac_peak_8720 | 8.10216  | PCNX_ENSG00000100731                                                           |
| 14 | 71699214 | 71699406 | KD2-H4K8ac_peak_8721 | 7.01964  |                                                                                |
| 14 | 71703662 | 71704004 | KD2-H4K8ac_peak_8722 | 4.77079  |                                                                                |
| 14 | 71787491 | 71788442 | KD2-H4K8ac_peak_8723 | 6.87217  | RP1-261D10.2_ENSG00000259146;SIPA1L1_ENSG00000197555                           |
| 14 | 71807548 | 71807984 | KD2-H4K8ac_peak_8724 | 6.1228   |                                                                                |
| 14 | 72052858 | 72053246 | KD2-H4K8ac_peak_8725 | 7.11925  |                                                                                |
| 14 | 72062732 | 72063037 | KD2-H4K8ac_peak_8726 | 9.15329  |                                                                                |
| 14 | 72095671 | 72095995 | KD2-H4K8ac_peak_8727 | 6.25869  |                                                                                |
| 14 | 73146463 | 73146683 | KD2-H4K8ac_peak_8728 | 5.3778   |                                                                                |
| 14 | 73203985 | 73204234 | KD2-H4K8ac_peak_8729 | 7.27716  |                                                                                |
| 14 | 73205003 | 73205344 | KD2-H4K8ac_peak_8730 | 11.05407 |                                                                                |
| 14 | 73206791 | 73207018 | KD2-H4K8ac_peak_8731 | 7.40111  |                                                                                |
| 14 | 73208341 | 73209625 | KD2-H4K8ac_peak_8732 | 13.73635 |                                                                                |
| 14 | 73602717 | 73603048 | KD2-H4K8ac_peak_8733 | 12.23    | PSEN1_ENSG00000080815                                                          |
| 14 | 73603358 | 73603562 | KD2-H4K8ac_peak_8734 | 4.84206  | PSEN1_ENSG00000080815                                                          |
| 14 | 73928985 | 73929460 | KD2-H4K8ac_peak_8735 | 5.14125  | NUMB_ENSG00000133961;RP1-240K6.3_ENSG00000251393                               |
| 14 | 73957087 | 73957467 | KD2-H4K8ac_peak_8736 | 12.00597 | AC005280.1_ENSG00000170468;C14orf169_ENSG00000255242                           |
| 14 | 73957737 | 73958255 | KD2-H4K8ac_peak_8737 | 13.70605 | AC005280.1_ENSG00000170468;C14orf169_ENSG00000255242                           |
| 14 | 74035703 | 74036877 | KD2-H4K8ac_peak_8738 | 23.28866 |                                                                                |

|    |          |          |                      |          |                                                                                              |
|----|----------|----------|----------------------|----------|----------------------------------------------------------------------------------------------|
| 14 | 74058446 | 74059071 | KD2-H4K8ac_peak_8739 | 10.72313 | ACOT4_ENSG00000177465                                                                        |
| 14 | 74079280 | 74079636 | KD2-H4K8ac_peak_8740 | 8.10216  |                                                                                              |
| 14 | 74110096 | 74110811 | KD2-H4K8ac_peak_8741 | 4.54006  | DNAL1_ENSG00000119661                                                                        |
| 14 | 74180556 | 74180989 | KD2-H4K8ac_peak_8742 | 9.1707   | PNMA1_ENSG00000176903                                                                        |
| 14 | 74185591 | 74185819 | KD2-H4K8ac_peak_8743 | 7.22457  |                                                                                              |
| 14 | 74253573 | 74254500 | KD2-H4K8ac_peak_8744 | 12.44769 | RP5-1021I20.1_ENSG00000259065                                                                |
| 14 | 74318744 | 74319195 | KD2-H4K8ac_peak_8745 | 8.94469  | PTGR2_ENSG00000140043;RP5-1021I20.4_ENSG00000258653                                          |
| 14 | 74319526 | 74319731 | KD2-H4K8ac_peak_8746 | 3.97079  | PTGR2_ENSG00000140043;RP5-1021I20.4_ENSG00000258653                                          |
| 14 | 74352545 | 74352811 | KD2-H4K8ac_peak_8747 | 11.05407 | ZNF410_ENSG00000119725                                                                       |
| 14 | 74353294 | 74354084 | KD2-H4K8ac_peak_8748 | 11.05467 | ZNF410_ENSG00000119725                                                                       |
| 14 | 74417059 | 74417283 | KD2-H4K8ac_peak_8749 | 6.40297  | FAM161B_ENSG00000156050;COQ6_ENSG00000119723                                                 |
| 14 | 74485391 | 74485904 | KD2-H4K8ac_peak_8750 | 17.50963 | ENTPD5_ENSG00000187097;CCDC176_ENSG00000119636                                               |
| 14 | 74723863 | 74724176 | KD2-H4K8ac_peak_8751 | 5.13615  |                                                                                              |
| 14 | 74725094 | 74725501 | KD2-H4K8ac_peak_8752 | 4.66652  |                                                                                              |
| 14 | 74725707 | 74725943 | KD2-H4K8ac_peak_8753 | 6.40683  |                                                                                              |
| 14 | 74769382 | 74769654 | KD2-H4K8ac_peak_8754 | 15.01306 | ABCD4_ENSG00000119688;VRTN_ENSG00000133980                                                   |
| 14 | 74769923 | 74770410 | KD2-H4K8ac_peak_8755 | 9.1707   | ABCD4_ENSG00000119688;VRTN_ENSG00000133980                                                   |
| 14 | 74869091 | 74869332 | KD2-H4K8ac_peak_8756 | 6.8836   |                                                                                              |
| 14 | 74959752 | 74959960 | KD2-H4K8ac_peak_8757 | 10.0692  | NPC2_ENSG00000119655;ISCA2_ENSG00000165898                                                   |
| 14 | 74968148 | 74968406 | KD2-H4K8ac_peak_8758 | 9.11031  |                                                                                              |
| 14 | 75003085 | 75003278 | KD2-H4K8ac_peak_8759 | 7.36933  |                                                                                              |
| 14 | 75036688 | 75037046 | KD2-H4K8ac_peak_8760 | 7.1181   |                                                                                              |
| 14 | 75044507 | 75044919 | KD2-H4K8ac_peak_8761 | 6.66692  |                                                                                              |
| 14 | 75061915 | 75062372 | KD2-H4K8ac_peak_8762 | 6.13909  |                                                                                              |
| 14 | 75078452 | 75079306 | KD2-H4K8ac_peak_8763 | 8.16906  | LTBP2_ENSG00000119681                                                                        |
| 14 | 75103901 | 75104213 | KD2-H4K8ac_peak_8764 | 4.86324  |                                                                                              |
| 14 | 75179535 | 75179767 | KD2-H4K8ac_peak_8765 | 10.96455 | AREL1_ENSG00000119682;AC007956.1_ENSG00000214670;SNORA7_ENSG00000222604;FCF1_ENSG00000119616 |
| 14 | 75229282 | 75229513 | KD2-H4K8ac_peak_8766 | 13.39973 | YLPM1_ENSG00000119596                                                                        |
| 14 | 75230106 | 75230435 | KD2-H4K8ac_peak_8767 | 13.81781 | YLPM1_ENSG00000119596                                                                        |
| 14 | 75348247 | 75348908 | KD2-H4K8ac_peak_8768 | 17.38513 | DLST_ENSG00000119689                                                                         |
| 14 | 75389420 | 75389915 | KD2-H4K8ac_peak_8769 | 13.62729 | RPS6KL1_ENSG00000198208                                                                      |
| 14 | 75421928 | 75422665 | KD2-H4K8ac_peak_8770 | 7.36799  | PGF_ENSG00000119630                                                                          |
| 14 | 75439833 | 75440360 | KD2-H4K8ac_peak_8771 | 8.23274  |                                                                                              |
| 14 | 75444277 | 75444489 | KD2-H4K8ac_peak_8772 | 7.92775  |                                                                                              |
| 14 | 75445382 | 75445619 | KD2-H4K8ac_peak_8773 | 9.3793   |                                                                                              |
| 14 | 75446451 | 75446832 | KD2-H4K8ac_peak_8774 | 8.5092   |                                                                                              |
| 14 | 75469860 | 75470151 | KD2-H4K8ac_peak_8775 | 11.86082 | EIF2B2_ENSG00000119718                                                                       |
| 14 | 75517322 | 75518122 | KD2-H4K8ac_peak_8776 | 12.08081 | MLH3_ENSG00000119684                                                                         |
| 14 | 75535075 | 75535320 | KD2-H4K8ac_peak_8777 | 7.22936  | ACYP1_ENSG00000119640                                                                        |
| 14 | 75535905 | 75536211 | KD2-H4K8ac_peak_8778 | 7.28628  | ACYP1_ENSG00000119640                                                                        |
| 14 | 75536431 | 75537014 | KD2-H4K8ac_peak_8779 | 8.79106  | ACYP1_ENSG00000119640                                                                        |
| 14 | 75546634 | 75546832 | KD2-H4K8ac_peak_8780 | 5.57044  |                                                                                              |
| 14 | 75593307 | 75594144 | KD2-H4K8ac_peak_8781 | 13.70753 | NEK9_ENSG00000119638;RP11-950C14.7_ENSG00000259138                                           |
| 14 | 75642635 | 75643469 | KD2-H4K8ac_peak_8782 | 13.81781 | TMED10_ENSG00000170348                                                                       |
| 14 | 75703904 | 75704105 | KD2-H4K8ac_peak_8783 | 6.94255  |                                                                                              |
| 14 | 75743689 | 75744333 | KD2-H4K8ac_peak_8784 | 7.0983   |                                                                                              |

|    |          |          |                      |          |                                                    |
|----|----------|----------|----------------------|----------|----------------------------------------------------|
| 14 | 75745225 | 75745465 | KD2-H4K8ac_peak_8785 | 12.80176 | FOS_ENSG00000170345                                |
| 14 | 75894275 | 75895378 | KD2-H4K8ac_peak_8786 | 21.29027 | RP11-293M10.6_ENSG00000259319;JDP2_ENSG00000140044 |
| 14 | 75900853 | 75901124 | KD2-H4K8ac_peak_8787 | 5.20908  |                                                    |
| 14 | 75901770 | 75902480 | KD2-H4K8ac_peak_8788 | 10.53377 |                                                    |
| 14 | 76102891 | 76103407 | KD2-H4K8ac_peak_8789 | 4.06758  |                                                    |
| 14 | 76445195 | 76445456 | KD2-H4K8ac_peak_8790 | 8.2413   |                                                    |
| 14 | 76449230 | 76449469 | KD2-H4K8ac_peak_8791 | 7.96322  | TGFB3_ENSG00000119699                              |
| 14 | 76617730 | 76618022 | KD2-H4K8ac_peak_8792 | 5.45396  | GPATCH2L_ENSG00000089916                           |
| 14 | 77176935 | 77177266 | KD2-H4K8ac_peak_8793 | 5.00214  |                                                    |
| 14 | 77183817 | 77184023 | KD2-H4K8ac_peak_8794 | 5.14125  |                                                    |
| 14 | 77185905 | 77186506 | KD2-H4K8ac_peak_8795 | 11.05407 |                                                    |
| 14 | 77186928 | 77187213 | KD2-H4K8ac_peak_8796 | 5.54647  |                                                    |
| 14 | 77227402 | 77229025 | KD2-H4K8ac_peak_8797 | 14.39182 | RP11-99E15.2_ENSG00000258569;VASH1_ENSG00000071246 |
| 14 | 77278765 | 77279152 | KD2-H4K8ac_peak_8798 | 16.71291 |                                                    |
| 14 | 77371247 | 77371473 | KD2-H4K8ac_peak_8799 | 6.99815  |                                                    |
| 14 | 77379719 | 77380363 | KD2-H4K8ac_peak_8800 | 16.29309 |                                                    |
| 14 | 77383290 | 77383493 | KD2-H4K8ac_peak_8801 | 7.51945  |                                                    |
| 14 | 77383742 | 77384674 | KD2-H4K8ac_peak_8802 | 15.27939 |                                                    |
| 14 | 77385374 | 77386332 | KD2-H4K8ac_peak_8803 | 21.01976 |                                                    |
| 14 | 77386575 | 77386994 | KD2-H4K8ac_peak_8804 | 13.73635 |                                                    |
| 14 | 77387191 | 77387468 | KD2-H4K8ac_peak_8805 | 12.2118  |                                                    |
| 14 | 77387701 | 77387947 | KD2-H4K8ac_peak_8806 | 5.95537  |                                                    |
| 14 | 77389194 | 77389648 | KD2-H4K8ac_peak_8807 | 5.13893  |                                                    |
| 14 | 77390307 | 77391083 | KD2-H4K8ac_peak_8808 | 9.16531  | RP11-488C13.4_ENSG00000259058                      |
| 14 | 77398802 | 77399198 | KD2-H4K8ac_peak_8809 | 7.40314  |                                                    |
| 14 | 77401937 | 77402158 | KD2-H4K8ac_peak_8810 | 6.66692  |                                                    |
| 14 | 77402663 | 77402995 | KD2-H4K8ac_peak_8811 | 5.57044  |                                                    |
| 14 | 77403199 | 77403519 | KD2-H4K8ac_peak_8812 | 4.76709  |                                                    |
| 14 | 77403848 | 77405170 | KD2-H4K8ac_peak_8813 | 10.17486 |                                                    |
| 14 | 77406001 | 77406275 | KD2-H4K8ac_peak_8814 | 6.2781   |                                                    |
| 14 | 77406536 | 77406898 | KD2-H4K8ac_peak_8815 | 7.10552  |                                                    |
| 14 | 77408478 | 77408875 | KD2-H4K8ac_peak_8816 | 4.42765  |                                                    |
| 14 | 77412733 | 77413591 | KD2-H4K8ac_peak_8817 | 8.86099  |                                                    |
| 14 | 77414211 | 77415092 | KD2-H4K8ac_peak_8818 | 10.19949 |                                                    |
| 14 | 77417349 | 77417828 | KD2-H4K8ac_peak_8819 | 9.24289  |                                                    |
| 14 | 77419169 | 77419485 | KD2-H4K8ac_peak_8820 | 5.9696   |                                                    |
| 14 | 77419787 | 77420442 | KD2-H4K8ac_peak_8821 | 15.01306 |                                                    |
| 14 | 77421093 | 77421974 | KD2-H4K8ac_peak_8822 | 11.8457  |                                                    |
| 14 | 77422200 | 77422786 | KD2-H4K8ac_peak_8823 | 9.63487  |                                                    |
| 14 | 77423170 | 77423421 | KD2-H4K8ac_peak_8824 | 14.66123 |                                                    |
| 14 | 77424069 | 77424349 | KD2-H4K8ac_peak_8825 | 9.20193  |                                                    |
| 14 | 77424663 | 77425634 | KD2-H4K8ac_peak_8826 | 5.30799  | RP11-7F17.7_ENSG00000258602                        |
| 14 | 77426732 | 77427167 | KD2-H4K8ac_peak_8827 | 8.30974  | RP11-7F17.7_ENSG00000258602                        |
| 14 | 77427999 | 77428345 | KD2-H4K8ac_peak_8828 | 6.0073   |                                                    |
| 14 | 77458950 | 77459366 | KD2-H4K8ac_peak_8829 | 6.16747  |                                                    |
| 14 | 77493189 | 77493553 | KD2-H4K8ac_peak_8830 | 5.66705  |                                                    |

|    |          |          |                      |          |                                                                           |
|----|----------|----------|----------------------|----------|---------------------------------------------------------------------------|
| 14 | 77493978 | 77495025 | KD2-H4K8ac_peak_8831 | 11.41236 | IRF2BPL_ENSG00000119669                                                   |
| 14 | 77498981 | 77500406 | KD2-H4K8ac_peak_8832 | 21.11201 |                                                                           |
| 14 | 77502265 | 77502486 | KD2-H4K8ac_peak_8833 | 6.36319  |                                                                           |
| 14 | 77503773 | 77504684 | KD2-H4K8ac_peak_8834 | 9.76863  |                                                                           |
| 14 | 77506095 | 77506343 | KD2-H4K8ac_peak_8835 | 6.60096  |                                                                           |
| 14 | 77507090 | 77507563 | KD2-H4K8ac_peak_8836 | 13.13965 | RP11-7F17.5_ENSG00000246548                                               |
| 14 | 77512605 | 77512889 | KD2-H4K8ac_peak_8837 | 8.30974  |                                                                           |
| 14 | 77516507 | 77516774 | KD2-H4K8ac_peak_8838 | 7.29632  |                                                                           |
| 14 | 77517482 | 77517874 | KD2-H4K8ac_peak_8839 | 9.95119  |                                                                           |
| 14 | 77518359 | 77518609 | KD2-H4K8ac_peak_8840 | 6.99815  |                                                                           |
| 14 | 77518834 | 77519463 | KD2-H4K8ac_peak_8841 | 10.96455 |                                                                           |
| 14 | 77590985 | 77591545 | KD2-H4K8ac_peak_8842 | 4.64018  |                                                                           |
| 14 | 77624077 | 77624722 | KD2-H4K8ac_peak_8843 | 10.29842 |                                                                           |
| 14 | 77624992 | 77625518 | KD2-H4K8ac_peak_8844 | 18.54875 |                                                                           |
| 14 | 77647410 | 77647756 | KD2-H4K8ac_peak_8845 | 8.10216  |                                                                           |
| 14 | 77648711 | 77648924 | KD2-H4K8ac_peak_8846 | 5.9696   |                                                                           |
| 14 | 77786866 | 77787162 | KD2-H4K8ac_peak_8847 | 11.89502 | POMT2_ENSG0000009830;GSTZ1_ENSG00000100577                                |
| 14 | 77787394 | 77787592 | KD2-H4K8ac_peak_8848 | 11.05407 | POMT2_ENSG0000009830;GSTZ1_ENSG00000100577                                |
| 14 | 77843133 | 77843390 | KD2-H4K8ac_peak_8849 | 13.81781 | TMED8_ENSG00000100580;SAMD15_ENSG00000100583                              |
| 14 | 77924483 | 77924946 | KD2-H4K8ac_peak_8850 | 9.16531  | VIPAS39_ENSG00000151445;AHSA1_ENSG00000100591                             |
| 14 | 78082696 | 78082930 | KD2-H4K8ac_peak_8851 | 5.92591  | SPTLC2_ENSG00000100596                                                    |
| 14 | 78121594 | 78121866 | KD2-H4K8ac_peak_8852 | 4.42765  |                                                                           |
| 14 | 78173763 | 78174220 | KD2-H4K8ac_peak_8853 | 5.01002  | ALKBH1_ENSG00000100601;SLIRP_ENSG00000119705                              |
| 14 | 78174510 | 78174791 | KD2-H4K8ac_peak_8854 | 8.52559  | ALKBH1_ENSG00000100601;SLIRP_ENSG00000119705                              |
| 14 | 78227057 | 78227439 | KD2-H4K8ac_peak_8855 | 17.8868  | SNW1_ENSG00000100603;C14orf178_ENSG00000197734;AC008372.1_ENSG00000268208 |
| 14 | 78227775 | 78228275 | KD2-H4K8ac_peak_8856 | 4.37815  | SNW1_ENSG00000100603;C14orf178_ENSG00000197734;AC008372.1_ENSG00000268208 |
| 14 | 78265732 | 78266078 | KD2-H4K8ac_peak_8857 | 8.30974  | ADCK1_ENSG00000063761                                                     |
| 14 | 78266275 | 78266882 | KD2-H4K8ac_peak_8858 | 14.4458  | ADCK1_ENSG00000063761                                                     |
| 14 | 78345733 | 78346039 | KD2-H4K8ac_peak_8859 | 7.04492  |                                                                           |
| 14 | 78347599 | 78347813 | KD2-H4K8ac_peak_8860 | 8.30974  |                                                                           |
| 14 | 78349990 | 78350726 | KD2-H4K8ac_peak_8861 | 14.66631 |                                                                           |
| 14 | 78379760 | 78380016 | KD2-H4K8ac_peak_8862 | 5.86783  |                                                                           |
| 14 | 78388460 | 78388671 | KD2-H4K8ac_peak_8863 | 5.61067  |                                                                           |
| 14 | 78390775 | 78391117 | KD2-H4K8ac_peak_8864 | 7.27716  |                                                                           |
| 14 | 78432316 | 78432651 | KD2-H4K8ac_peak_8865 | 9.15069  |                                                                           |
| 14 | 78618791 | 78619176 | KD2-H4K8ac_peak_8866 | 4.01115  |                                                                           |
| 14 | 79745230 | 79745496 | KD2-H4K8ac_peak_8867 | 4.42765  |                                                                           |
| 14 | 81408354 | 81408586 | KD2-H4K8ac_peak_8868 | 5.57044  |                                                                           |
| 14 | 81421776 | 81421974 | KD2-H4K8ac_peak_8869 | 9.15069  | TSHR_ENSG00000165409                                                      |
| 14 | 81636018 | 81637013 | KD2-H4K8ac_peak_8870 | 11.79585 | RP11-114N19.3_ENSG00000258999                                             |
| 14 | 81687435 | 81687638 | KD2-H4K8ac_peak_8871 | 5.71749  | GTF2A1_ENSG00000165417                                                    |
| 14 | 81687851 | 81688255 | KD2-H4K8ac_peak_8872 | 7.27716  | GTF2A1_ENSG00000165417                                                    |
| 14 | 82001022 | 82001291 | KD2-H4K8ac_peak_8873 | 6.75638  | SEL1L_ENSG00000071537                                                     |
| 14 | 86400892 | 86401153 | KD2-H4K8ac_peak_8874 | 4.37708  | CTD-2341M24.1_ENSG00000258733                                             |
| 14 | 88459082 | 88459467 | KD2-H4K8ac_peak_8875 | 8.28234  | GALC_ENSG00000054983                                                      |
| 14 | 88459694 | 88460153 | KD2-H4K8ac_peak_8876 | 13.44374 | GALC_ENSG00000054983                                                      |

|    |          |          |                      |          |                                                         |
|----|----------|----------|----------------------|----------|---------------------------------------------------------|
| 14 | 88790186 | 88790471 | KD2-H4K8ac_peak_8877 | 11.89502 |                                                         |
| 14 | 88851671 | 88852295 | KD2-H4K8ac_peak_8878 | 9.15069  | SPATA7_ENSG00000042317                                  |
| 14 | 89020807 | 89021577 | KD2-H4K8ac_peak_8879 | 8.26945  | PTPN21_ENSG00000070778                                  |
| 14 | 89029513 | 89029799 | KD2-H4K8ac_peak_8880 | 9.11891  | ZC3H14_ENSG00000100722                                  |
| 14 | 89258534 | 89259185 | KD2-H4K8ac_peak_8881 | 11.02863 | EML5_ENSG00000165521                                    |
| 14 | 89259403 | 89259849 | KD2-H4K8ac_peak_8882 | 8.85813  | EML5_ENSG00000165521                                    |
| 14 | 89281447 | 89281694 | KD2-H4K8ac_peak_8883 | 6.16888  |                                                         |
| 14 | 89290835 | 89291481 | KD2-H4K8ac_peak_8884 | 8.1718   | TTC8_ENSG00000165533                                    |
| 14 | 89292427 | 89292836 | KD2-H4K8ac_peak_8885 | 6.40683  |                                                         |
| 14 | 89358231 | 89358425 | KD2-H4K8ac_peak_8886 | 9.15329  |                                                         |
| 14 | 89365960 | 89367126 | KD2-H4K8ac_peak_8887 | 8.90387  |                                                         |
| 14 | 89368086 | 89368722 | KD2-H4K8ac_peak_8888 | 9.63487  |                                                         |
| 14 | 89368982 | 89369247 | KD2-H4K8ac_peak_8889 | 4.42765  |                                                         |
| 14 | 89371328 | 89371714 | KD2-H4K8ac_peak_8890 | 8.85813  |                                                         |
| 14 | 89450826 | 89451140 | KD2-H4K8ac_peak_8891 | 5.1628   |                                                         |
| 14 | 89451721 | 89451957 | KD2-H4K8ac_peak_8892 | 9.36516  |                                                         |
| 14 | 89453296 | 89453849 | KD2-H4K8ac_peak_8893 | 9.402    |                                                         |
| 14 | 89463833 | 89464112 | KD2-H4K8ac_peak_8894 | 11.81678 |                                                         |
| 14 | 89465575 | 89465857 | KD2-H4K8ac_peak_8895 | 5.88845  |                                                         |
| 14 | 89506990 | 89507316 | KD2-H4K8ac_peak_8896 | 10.53377 |                                                         |
| 14 | 89507824 | 89508177 | KD2-H4K8ac_peak_8897 | 6.4095   |                                                         |
| 14 | 89678368 | 89678984 | KD2-H4K8ac_peak_8898 | 6.66692  |                                                         |
| 14 | 89883692 | 89884385 | KD2-H4K8ac_peak_8899 | 16.23438 | FOXN3-AS1_ENSG00000258920                               |
| 14 | 90085580 | 90085905 | KD2-H4K8ac_peak_8900 | 9.63925  | FOXN3_ENSG00000053254                                   |
| 14 | 90091412 | 90092496 | KD2-H4K8ac_peak_8901 | 10.06887 |                                                         |
| 14 | 90127100 | 90127409 | KD2-H4K8ac_peak_8902 | 10.08707 |                                                         |
| 14 | 90167703 | 90167947 | KD2-H4K8ac_peak_8903 | 10.19949 |                                                         |
| 14 | 90168143 | 90168366 | KD2-H4K8ac_peak_8904 | 7.76104  |                                                         |
| 14 | 90422352 | 90422860 | KD2-H4K8ac_peak_8905 | 7.69294  |                                                         |
| 14 | 90625221 | 90625454 | KD2-H4K8ac_peak_8906 | 3.72574  |                                                         |
| 14 | 90722955 | 90723349 | KD2-H4K8ac_peak_8907 | 17.55491 | PSMC1_ENSG00000100764                                   |
| 14 | 90796984 | 90798280 | KD2-H4K8ac_peak_8908 | 10.96455 | NRDE2_ENSG00000119720                                   |
| 14 | 90848605 | 90848897 | KD2-H4K8ac_peak_8909 | 5.45396  |                                                         |
| 14 | 90849142 | 90849351 | KD2-H4K8ac_peak_8910 | 5.02474  |                                                         |
| 14 | 90849843 | 90850706 | KD2-H4K8ac_peak_8911 | 19.42408 |                                                         |
| 14 | 90862824 | 90863157 | KD2-H4K8ac_peak_8912 | 9.20193  | CALM1_ENSG00000198668                                   |
| 14 | 90917364 | 90918110 | KD2-H4K8ac_peak_8913 | 13.73635 |                                                         |
| 14 | 90918788 | 90919105 | KD2-H4K8ac_peak_8914 | 5.9696   |                                                         |
| 14 | 90919306 | 90919513 | KD2-H4K8ac_peak_8915 | 5.75757  |                                                         |
| 14 | 90919976 | 90920731 | KD2-H4K8ac_peak_8916 | 25.95849 | RP11-1078H9.1_ENSG00000258678;LINC00642_ENSG00000233208 |
| 14 | 90920992 | 90921578 | KD2-H4K8ac_peak_8917 | 10.44656 | RP11-1078H9.1_ENSG00000258678;LINC00642_ENSG00000233208 |
| 14 | 90978375 | 90978775 | KD2-H4K8ac_peak_8918 | 4.98072  |                                                         |
| 14 | 90988915 | 90989341 | KD2-H4K8ac_peak_8919 | 12.23    |                                                         |
| 14 | 91082219 | 91082687 | KD2-H4K8ac_peak_8920 | 8.17902  |                                                         |
| 14 | 91164201 | 91164424 | KD2-H4K8ac_peak_8921 | 8.17902  | RP11-661G16.2_ENSG00000258716                           |
| 14 | 91165157 | 91165472 | KD2-H4K8ac_peak_8922 | 7.27716  |                                                         |

|    |          |          |                      |          |                                                                                     |
|----|----------|----------|----------------------|----------|-------------------------------------------------------------------------------------|
| 14 | 91282172 | 91282611 | KD2-H4K8ac_peak_8923 | 9.36516  | TTC7B_ENSG00000165914                                                               |
| 14 | 91283134 | 91283447 | KD2-H4K8ac_peak_8924 | 5.54647  | TTC7B_ENSG00000165914                                                               |
| 14 | 91294941 | 91295430 | KD2-H4K8ac_peak_8925 | 8.04448  | CTD-3035D6.2_ENSG00000258884                                                        |
| 14 | 91580049 | 91580409 | KD2-H4K8ac_peak_8926 | 5.30799  |                                                                                     |
| 14 | 91580667 | 91580865 | KD2-H4K8ac_peak_8927 | 6.05809  |                                                                                     |
| 14 | 91581087 | 91581312 | KD2-H4K8ac_peak_8928 | 5.88845  |                                                                                     |
| 14 | 91636381 | 91636933 | KD2-H4K8ac_peak_8929 | 11.9209  |                                                                                     |
| 14 | 91642981 | 91643212 | KD2-H4K8ac_peak_8930 | 5.88845  |                                                                                     |
| 14 | 91716006 | 91716470 | KD2-H4K8ac_peak_8931 | 8.23274  |                                                                                     |
| 14 | 91719300 | 91720692 | KD2-H4K8ac_peak_8932 | 17.8868  | GPR68_ENSG00000119714                                                               |
| 14 | 91730513 | 91731291 | KD2-H4K8ac_peak_8933 | 6.25869  |                                                                                     |
| 14 | 91736753 | 91736964 | KD2-H4K8ac_peak_8934 | 4.98318  |                                                                                     |
| 14 | 91746127 | 91746416 | KD2-H4K8ac_peak_8935 | 3.93917  |                                                                                     |
| 14 | 91749628 | 91750165 | KD2-H4K8ac_peak_8936 | 5.4779   |                                                                                     |
| 14 | 91751596 | 91752482 | KD2-H4K8ac_peak_8937 | 9.77606  |                                                                                     |
| 14 | 91790186 | 91790766 | KD2-H4K8ac_peak_8938 | 8.58725  |                                                                                     |
| 14 | 91842940 | 91843144 | KD2-H4K8ac_peak_8939 | 6.69844  |                                                                                     |
| 14 | 91845542 | 91846050 | KD2-H4K8ac_peak_8940 | 7.82935  |                                                                                     |
| 14 | 91865212 | 91865409 | KD2-H4K8ac_peak_8941 | 5.14125  |                                                                                     |
| 14 | 91884443 | 91884796 | KD2-H4K8ac_peak_8942 | 3.82059  | CCDC88C_ENSG00000015133;RP11-895M11.3_ENSG00000258798;RP11-895M11.2_ENSG00000258446 |
| 14 | 91976025 | 91977274 | KD2-H4K8ac_peak_8943 | 10.66719 | SMEK1_ENSG00000100796                                                               |
| 14 | 92505827 | 92506309 | KD2-H4K8ac_peak_8944 | 15.22643 | TRIP11_ENSG00000100815                                                              |
| 14 | 92572645 | 92572900 | KD2-H4K8ac_peak_8945 | 11.05407 | ATXN3_ENSG00000066427                                                               |
| 14 | 92573268 | 92573694 | KD2-H4K8ac_peak_8946 | 15.9336  | ATXN3_ENSG00000066427                                                               |
| 14 | 92587674 | 92588910 | KD2-H4K8ac_peak_8947 | 24.85162 | NDUFB1_ENSG00000183648;CPSF2_ENSG00000165934                                        |
| 14 | 93214493 | 93214865 | KD2-H4K8ac_peak_8948 | 6.56211  | LGMN_ENSG00000100600                                                                |
| 14 | 93260797 | 93261216 | KD2-H4K8ac_peak_8949 | 14.48922 | GOLGA5_ENSG00000066455                                                              |
| 14 | 93341430 | 93341712 | KD2-H4K8ac_peak_8950 | 5.15777  |                                                                                     |
| 14 | 93372728 | 93372945 | KD2-H4K8ac_peak_8951 | 6.00226  | RP11-862G15.2_ENSG00000258499                                                       |
| 14 | 93373608 | 93373840 | KD2-H4K8ac_peak_8952 | 4.77079  | RP11-862G15.2_ENSG00000258499                                                       |
| 14 | 93383120 | 93383647 | KD2-H4K8ac_peak_8953 | 11.09936 |                                                                                     |
| 14 | 93384202 | 93384624 | KD2-H4K8ac_peak_8954 | 9.63487  |                                                                                     |
| 14 | 93389586 | 93389974 | KD2-H4K8ac_peak_8955 | 6.97919  | CHGA_ENSG00000100604                                                                |
| 14 | 93411843 | 93412137 | KD2-H4K8ac_peak_8956 | 7.40314  |                                                                                     |
| 14 | 93424833 | 93425098 | KD2-H4K8ac_peak_8957 | 7.76569  |                                                                                     |
| 14 | 93426205 | 93427199 | KD2-H4K8ac_peak_8958 | 9.16531  |                                                                                     |
| 14 | 93427406 | 93427630 | KD2-H4K8ac_peak_8959 | 5.82799  |                                                                                     |
| 14 | 93429810 | 93430099 | KD2-H4K8ac_peak_8960 | 7.64093  |                                                                                     |
| 14 | 93430878 | 93431310 | KD2-H4K8ac_peak_8961 | 5.9696   |                                                                                     |
| 14 | 93452826 | 93453019 | KD2-H4K8ac_peak_8962 | 7.40111  |                                                                                     |
| 14 | 93453504 | 93454096 | KD2-H4K8ac_peak_8963 | 6.60096  |                                                                                     |
| 14 | 93457653 | 93457889 | KD2-H4K8ac_peak_8964 | 7.372    |                                                                                     |
| 14 | 93464606 | 93464844 | KD2-H4K8ac_peak_8965 | 6.60096  |                                                                                     |
| 14 | 93472452 | 93473015 | KD2-H4K8ac_peak_8966 | 7.82935  |                                                                                     |
| 14 | 93474113 | 93474630 | KD2-H4K8ac_peak_8967 | 8.10216  |                                                                                     |
| 14 | 93474999 | 93475922 | KD2-H4K8ac_peak_8968 | 16.61426 |                                                                                     |

|    |          |          |                      |          |                                                                            |
|----|----------|----------|----------------------|----------|----------------------------------------------------------------------------|
| 14 | 93476245 | 93477309 | KD2-H4K8ac_peak_8969 | 14.67919 |                                                                            |
| 14 | 93478383 | 93479565 | KD2-H4K8ac_peak_8970 | 8.10216  |                                                                            |
| 14 | 93489347 | 93489559 | KD2-H4K8ac_peak_8971 | 6.83936  |                                                                            |
| 14 | 93490177 | 93490932 | KD2-H4K8ac_peak_8972 | 11.86082 |                                                                            |
| 14 | 93512227 | 93512425 | KD2-H4K8ac_peak_8973 | 6.25869  |                                                                            |
| 14 | 93557937 | 93558304 | KD2-H4K8ac_peak_8974 | 8.52881  |                                                                            |
| 14 | 93581093 | 93581289 | KD2-H4K8ac_peak_8975 | 7.10552  |                                                                            |
| 14 | 93581886 | 93582978 | KD2-H4K8ac_peak_8976 | 14.68449 | ITPK1_ENSG00000100605                                                      |
| 14 | 93651429 | 93651743 | KD2-H4K8ac_peak_8977 | 9.36516  | MOAP1_ENSG00000165943;TMEM251_ENSG00000153485;RP11-371E8.4_ENSG00000259066 |
| 14 | 93672280 | 93672643 | KD2-H4K8ac_peak_8978 | 6.57893  | C14orf142_ENSG00000170270;UBR7_ENSG00000012963                             |
| 14 | 93696989 | 93697774 | KD2-H4K8ac_peak_8979 | 17.8868  |                                                                            |
| 14 | 93798728 | 93799359 | KD2-H4K8ac_peak_8980 | 13.81781 | BTBD7_ENSG0000011114;UNC79_ENSG00000133958                                 |
| 14 | 93896649 | 93896976 | KD2-H4K8ac_peak_8981 | 4.42765  |                                                                            |
| 14 | 94211917 | 94213065 | KD2-H4K8ac_peak_8982 | 5.75757  |                                                                            |
| 14 | 94213265 | 94213599 | KD2-H4K8ac_peak_8983 | 11.36939 |                                                                            |
| 14 | 94214803 | 94215013 | KD2-H4K8ac_peak_8984 | 7.11824  |                                                                            |
| 14 | 94215379 | 94215641 | KD2-H4K8ac_peak_8985 | 5.94405  |                                                                            |
| 14 | 94254465 | 94255275 | KD2-H4K8ac_peak_8986 | 6.20982  | PRIMA1_ENSG00000175785                                                     |
| 14 | 94255576 | 94256016 | KD2-H4K8ac_peak_8987 | 8.79106  | PRIMA1_ENSG00000175785                                                     |
| 14 | 94359237 | 94359929 | KD2-H4K8ac_peak_8988 | 6.99815  |                                                                            |
| 14 | 94372631 | 94373109 | KD2-H4K8ac_peak_8989 | 8.1718   |                                                                            |
| 14 | 94407850 | 94408053 | KD2-H4K8ac_peak_8990 | 7.26029  |                                                                            |
| 14 | 94492163 | 94492432 | KD2-H4K8ac_peak_8991 | 4.76709  | OTUB2_ENSG00000089723                                                      |
| 14 | 94492828 | 94493287 | KD2-H4K8ac_peak_8992 | 9.63487  | OTUB2_ENSG00000089723                                                      |
| 14 | 95235905 | 95236458 | KD2-H4K8ac_peak_8993 | 14.15075 | GSC_ENSG00000133937                                                        |
| 14 | 95403349 | 95403872 | KD2-H4K8ac_peak_8994 | 14.8083  |                                                                            |
| 14 | 95469497 | 95469759 | KD2-H4K8ac_peak_8995 | 4.66652  |                                                                            |
| 14 | 95473045 | 95473317 | KD2-H4K8ac_peak_8996 | 6.8836   |                                                                            |
| 14 | 95474213 | 95474406 | KD2-H4K8ac_peak_8997 | 6.78668  |                                                                            |
| 14 | 95475701 | 95475902 | KD2-H4K8ac_peak_8998 | 3.75035  |                                                                            |
| 14 | 95537441 | 95537667 | KD2-H4K8ac_peak_8999 | 6.64891  |                                                                            |
| 14 | 95562391 | 95562583 | KD2-H4K8ac_peak_9000 | 9.15329  |                                                                            |
| 14 | 95622911 | 95623788 | KD2-H4K8ac_peak_9001 | 7.76329  | DICER1_ENSG00000100697;DICER1-AS1_ENSG00000235706                          |
| 14 | 95624039 | 95624704 | KD2-H4K8ac_peak_9002 | 10.19949 | DICER1_ENSG00000100697;DICER1-AS1_ENSG00000235706                          |
| 14 | 95786505 | 95786986 | KD2-H4K8ac_peak_9003 | 13.09607 | CLMN_ENSG00000165959                                                       |
| 14 | 95875229 | 95875576 | KD2-H4K8ac_peak_9004 | 10.96455 | LINC00341_ENSG00000229645                                                  |
| 14 | 95947889 | 95948367 | KD2-H4K8ac_peak_9005 | 6.81873  |                                                                            |
| 14 | 95963048 | 95963458 | KD2-H4K8ac_peak_9006 | 4.52326  |                                                                            |
| 14 | 95982329 | 95982609 | KD2-H4K8ac_peak_9007 | 6.83936  | RP11-1070N10.3_ENSG00000258572                                             |
| 14 | 95983009 | 95983562 | KD2-H4K8ac_peak_9008 | 5.32713  | RP11-1070N10.3_ENSG00000258572                                             |
| 14 | 95986466 | 95986980 | KD2-H4K8ac_peak_9009 | 5.15777  |                                                                            |
| 14 | 96505800 | 96506300 | KD2-H4K8ac_peak_9010 | 11.92978 | C14orf132_ENSG00000227051                                                  |
| 14 | 96555883 | 96556614 | KD2-H4K8ac_peak_9011 | 4.86324  |                                                                            |
| 14 | 96557861 | 96558300 | KD2-H4K8ac_peak_9012 | 7.98621  |                                                                            |
| 14 | 96561759 | 96562006 | KD2-H4K8ac_peak_9013 | 6.99815  |                                                                            |
| 14 | 96563545 | 96563787 | KD2-H4K8ac_peak_9014 | 4.77079  |                                                                            |



|    |           |          |                      |          |                                                      |
|----|-----------|----------|----------------------|----------|------------------------------------------------------|
| 14 | 96583810  | 96584135 | KD2-H4K8ac_peak_9015 | 7.47462  |                                                      |
| 14 | 96760759  | 96761009 | KD2-H4K8ac_peak_9016 | 4.37708  |                                                      |
| 14 | 96829235  | 96829608 | KD2-H4K8ac_peak_9017 | 6.25869  | ATG2B_ENSG00000066739;GSKIP_ENSG00000100744          |
| 14 | 96857515  | 96857847 | KD2-H4K8ac_peak_9018 | 10.29842 | AK7_ENSG00000140057                                  |
| 14 | 96968068  | 96969358 | KD2-H4K8ac_peak_9019 | 13.73635 | RP11-872J21.3_ENSG00000260806;PAPOLA_ENSG00000090060 |
| 14 | 97059390  | 97059677 | KD2-H4K8ac_peak_9020 | 6.65673  | RP11-433J8.1_ENSG00000258702                         |
| 14 | 97081122  | 97081318 | KD2-H4K8ac_peak_9021 | 5.14125  |                                                      |
| 14 | 97091020  | 97091216 | KD2-H4K8ac_peak_9022 | 7.27716  |                                                      |
| 14 | 97228872  | 97229120 | KD2-H4K8ac_peak_9023 | 8.1233   |                                                      |
| 14 | 97263750  | 97264186 | KD2-H4K8ac_peak_9024 | 12.25733 | VRK1_ENSG00000100749                                 |
| 14 | 99946685  | 99947029 | KD2-H4K8ac_peak_9025 | 8.5092   | SETD3_ENSG00000183576;CCNK_ENSG00000090061           |
| 14 | 99947795  | 99948100 | KD2-H4K8ac_peak_9026 | 12.42547 | SETD3_ENSG00000183576;CCNK_ENSG00000090061           |
| 14 | 100004763 | 1E+08    | KD2-H4K8ac_peak_9027 | 6.1298   |                                                      |
| 14 | 100007838 | 1E+08    | KD2-H4K8ac_peak_9028 | 5.4497   |                                                      |
| 14 | 100026766 | 1E+08    | KD2-H4K8ac_peak_9029 | 7.70067  |                                                      |
| 14 | 100027991 | 1E+08    | KD2-H4K8ac_peak_9030 | 6.16103  |                                                      |
| 14 | 100031321 | 1E+08    | KD2-H4K8ac_peak_9031 | 12.75059 |                                                      |
| 14 | 100038249 | 1E+08    | KD2-H4K8ac_peak_9032 | 4.54006  |                                                      |
| 14 | 100039190 | 1E+08    | KD2-H4K8ac_peak_9033 | 10.19949 |                                                      |
| 14 | 100057485 | 1E+08    | KD2-H4K8ac_peak_9034 | 7.69287  |                                                      |
| 14 | 100071014 | 1E+08    | KD2-H4K8ac_peak_9035 | 16.25886 | CCDC85C_ENSG00000205476;RP11-543C4.1_ENSG00000247970 |
| 14 | 100111275 | 1E+08    | KD2-H4K8ac_peak_9036 | 7.36799  | HHIPL1_ENSG00000182218                               |
| 14 | 100196594 | 1E+08    | KD2-H4K8ac_peak_9037 | 8.16906  |                                                      |
| 14 | 100239507 | 1E+08    | KD2-H4K8ac_peak_9038 | 6.65673  |                                                      |
| 14 | 100240103 | 1E+08    | KD2-H4K8ac_peak_9039 | 11.79585 |                                                      |
| 14 | 100259091 | 1E+08    | KD2-H4K8ac_peak_9040 | 17.8868  |                                                      |
| 14 | 100259882 | 1E+08    | KD2-H4K8ac_peak_9041 | 9.59147  |                                                      |
| 14 | 100276388 | 1E+08    | KD2-H4K8ac_peak_9042 | 5.82799  |                                                      |
| 14 | 100437291 | 1E+08    | KD2-H4K8ac_peak_9043 | 8.26945  | EVL_ENSG00000196405                                  |
| 14 | 100438297 | 1E+08    | KD2-H4K8ac_peak_9044 | 10.87093 | EVL_ENSG00000196405                                  |
| 14 | 100609609 | 1.01E+08 | KD2-H4K8ac_peak_9045 | 5.53033  |                                                      |
| 14 | 100658604 | 1.01E+08 | KD2-H4K8ac_peak_9046 | 27.41885 |                                                      |
| 14 | 100659539 | 1.01E+08 | KD2-H4K8ac_peak_9047 | 24.39841 |                                                      |
| 14 | 100680108 | 1.01E+08 | KD2-H4K8ac_peak_9048 | 23.70459 |                                                      |
| 14 | 100705888 | 1.01E+08 | KD2-H4K8ac_peak_9049 | 6.25869  | RP11-638I2.4_ENSG00000258982                         |
| 14 | 100751862 | 1.01E+08 | KD2-H4K8ac_peak_9050 | 21.2844  |                                                      |
| 14 | 100772392 | 1.01E+08 | KD2-H4K8ac_peak_9051 | 7.76104  | SLC25A29_ENSG00000197119                             |
| 14 | 100773068 | 1.01E+08 | KD2-H4K8ac_peak_9052 | 8.86099  | SLC25A29_ENSG00000197119;MIR345_ENSG00000198984      |
| 14 | 100841910 | 1.01E+08 | KD2-H4K8ac_peak_9053 | 10.05606 | WARS_ENSG00000140105;WDR25_ENSG00000176473           |
| 14 | 100850248 | 1.01E+08 | KD2-H4K8ac_peak_9054 | 13.70605 |                                                      |
| 14 | 100852031 | 1.01E+08 | KD2-H4K8ac_peak_9055 | 7.86151  |                                                      |
| 14 | 100852894 | 1.01E+08 | KD2-H4K8ac_peak_9056 | 10.30284 |                                                      |
| 14 | 100853809 | 1.01E+08 | KD2-H4K8ac_peak_9057 | 9.40857  |                                                      |
| 14 | 100855836 | 1.01E+08 | KD2-H4K8ac_peak_9058 | 11.81678 |                                                      |
| 14 | 100857006 | 1.01E+08 | KD2-H4K8ac_peak_9059 | 8.76725  |                                                      |
| 14 | 100857575 | 1.01E+08 | KD2-H4K8ac_peak_9060 | 9.16531  |                                                      |

|    |           |          |                      |          |                               |
|----|-----------|----------|----------------------|----------|-------------------------------|
| 14 | 100860026 | 1.01E+08 | KD2-H4K8ac_peak_9061 | 7.07117  |                               |
| 14 | 100864022 | 1.01E+08 | KD2-H4K8ac_peak_9062 | 8.49556  |                               |
| 14 | 100867525 | 1.01E+08 | KD2-H4K8ac_peak_9063 | 17.42905 |                               |
| 14 | 100871680 | 1.01E+08 | KD2-H4K8ac_peak_9064 | 5.88845  | RP11-362L22.1_ENSG00000258620 |
| 14 | 100872348 | 1.01E+08 | KD2-H4K8ac_peak_9065 | 10.19949 | RP11-362L22.1_ENSG00000258620 |
| 14 | 100873832 | 1.01E+08 | KD2-H4K8ac_peak_9066 | 6.25869  | RP11-362L22.1_ENSG00000258620 |
| 14 | 100876438 | 1.01E+08 | KD2-H4K8ac_peak_9067 | 10.08874 |                               |
| 14 | 100879154 | 1.01E+08 | KD2-H4K8ac_peak_9068 | 10.0692  |                               |
| 14 | 100882960 | 1.01E+08 | KD2-H4K8ac_peak_9069 | 13.44374 |                               |
| 14 | 100884100 | 1.01E+08 | KD2-H4K8ac_peak_9070 | 11.89502 |                               |
| 14 | 100886075 | 1.01E+08 | KD2-H4K8ac_peak_9071 | 10.47747 |                               |
| 14 | 100887121 | 1.01E+08 | KD2-H4K8ac_peak_9072 | 5.88845  |                               |
| 14 | 100888743 | 1.01E+08 | KD2-H4K8ac_peak_9073 | 11.82518 |                               |
| 14 | 100889441 | 1.01E+08 | KD2-H4K8ac_peak_9074 | 8.90799  |                               |
| 14 | 100890159 | 1.01E+08 | KD2-H4K8ac_peak_9075 | 13.92465 |                               |
| 14 | 100890843 | 1.01E+08 | KD2-H4K8ac_peak_9076 | 5.94405  |                               |
| 14 | 100894106 | 1.01E+08 | KD2-H4K8ac_peak_9077 | 11.08187 |                               |
| 14 | 100894612 | 1.01E+08 | KD2-H4K8ac_peak_9078 | 3.83717  |                               |
| 14 | 100895465 | 1.01E+08 | KD2-H4K8ac_peak_9079 | 13.05834 |                               |
| 14 | 100897020 | 1.01E+08 | KD2-H4K8ac_peak_9080 | 5.9696   |                               |
| 14 | 100902902 | 1.01E+08 | KD2-H4K8ac_peak_9081 | 10.0665  |                               |
| 14 | 100905167 | 1.01E+08 | KD2-H4K8ac_peak_9082 | 19.98162 |                               |
| 14 | 100906497 | 1.01E+08 | KD2-H4K8ac_peak_9083 | 12.23    |                               |
| 14 | 100907612 | 1.01E+08 | KD2-H4K8ac_peak_9084 | 28.03233 |                               |
| 14 | 100909323 | 1.01E+08 | KD2-H4K8ac_peak_9085 | 10.19949 |                               |
| 14 | 100910201 | 1.01E+08 | KD2-H4K8ac_peak_9086 | 11.04256 |                               |
| 14 | 100911859 | 1.01E+08 | KD2-H4K8ac_peak_9087 | 8.14467  |                               |
| 14 | 100913536 | 1.01E+08 | KD2-H4K8ac_peak_9088 | 7.54952  |                               |
| 14 | 100915469 | 1.01E+08 | KD2-H4K8ac_peak_9089 | 4.86324  |                               |
| 14 | 100998486 | 1.01E+08 | KD2-H4K8ac_peak_9090 | 4.42765  |                               |
| 14 | 101000985 | 1.01E+08 | KD2-H4K8ac_peak_9091 | 5.81222  |                               |
| 14 | 101001808 | 1.01E+08 | KD2-H4K8ac_peak_9092 | 6.99815  |                               |
| 14 | 101004103 | 1.01E+08 | KD2-H4K8ac_peak_9093 | 5.50645  | CTD-2062F14.3_ENSG00000259031 |
| 14 | 101007843 | 1.01E+08 | KD2-H4K8ac_peak_9094 | 9.65086  |                               |
| 14 | 101008622 | 1.01E+08 | KD2-H4K8ac_peak_9095 | 5.82799  |                               |
| 14 | 101033165 | 1.01E+08 | KD2-H4K8ac_peak_9096 | 5.31717  |                               |
| 14 | 101033856 | 1.01E+08 | KD2-H4K8ac_peak_9097 | 17.27647 |                               |
| 14 | 101036318 | 1.01E+08 | KD2-H4K8ac_peak_9098 | 4.44527  |                               |
| 14 | 101043914 | 1.01E+08 | KD2-H4K8ac_peak_9099 | 9.51688  |                               |
| 14 | 101051962 | 1.01E+08 | KD2-H4K8ac_peak_9100 | 8.85813  | BEGAIN_ENSG00000183092        |
| 14 | 101054040 | 1.01E+08 | KD2-H4K8ac_peak_9101 | 7.49599  | BEGAIN_ENSG00000183092        |
| 14 | 101055097 | 1.01E+08 | KD2-H4K8ac_peak_9102 | 5.13615  | CTD-2644I21.1_ENSG00000258576 |
| 14 | 101055995 | 1.01E+08 | KD2-H4K8ac_peak_9103 | 4.42765  | CTD-2644I21.1_ENSG00000258576 |
| 14 | 101077366 | 1.01E+08 | KD2-H4K8ac_peak_9104 | 4.76709  |                               |
| 14 | 101079569 | 1.01E+08 | KD2-H4K8ac_peak_9105 | 8.86391  |                               |
| 14 | 101102832 | 1.01E+08 | KD2-H4K8ac_peak_9106 | 4.30319  |                               |

|    |           |          |                      |          |                              |
|----|-----------|----------|----------------------|----------|------------------------------|
| 14 | 101110841 | 1.01E+08 | KD2-H4K8ac_peak_9107 | 6.05995  |                              |
| 14 | 101120116 | 1.01E+08 | KD2-H4K8ac_peak_9108 | 3.90565  |                              |
| 14 | 101121186 | 1.01E+08 | KD2-H4K8ac_peak_9109 | 9.34195  |                              |
| 14 | 101123318 | 1.01E+08 | KD2-H4K8ac_peak_9110 | 7.37678  | LINC00523_ENSG00000196273    |
| 14 | 101124580 | 1.01E+08 | KD2-H4K8ac_peak_9111 | 7.76329  | LINC00523_ENSG00000196273    |
| 14 | 101126390 | 1.01E+08 | KD2-H4K8ac_peak_9112 | 5.42727  |                              |
| 14 | 101129223 | 1.01E+08 | KD2-H4K8ac_peak_9113 | 6.65673  |                              |
| 14 | 101130669 | 1.01E+08 | KD2-H4K8ac_peak_9114 | 6.65673  |                              |
| 14 | 101135011 | 1.01E+08 | KD2-H4K8ac_peak_9115 | 7.76329  |                              |
| 14 | 101136526 | 1.01E+08 | KD2-H4K8ac_peak_9116 | 9.58942  |                              |
| 14 | 101138727 | 1.01E+08 | KD2-H4K8ac_peak_9117 | 18.70664 |                              |
| 14 | 101140744 | 1.01E+08 | KD2-H4K8ac_peak_9118 | 12.57297 |                              |
| 14 | 101142279 | 1.01E+08 | KD2-H4K8ac_peak_9119 | 16.58205 |                              |
| 14 | 101143793 | 1.01E+08 | KD2-H4K8ac_peak_9120 | 20.30085 | RP11-566J3.2_ENSG00000258717 |
| 14 | 101146056 | 1.01E+08 | KD2-H4K8ac_peak_9121 | 5.75757  | RP11-566J3.2_ENSG00000258717 |
| 14 | 101146835 | 1.01E+08 | KD2-H4K8ac_peak_9122 | 7.70067  | RP11-566J3.2_ENSG00000258717 |
| 14 | 101147493 | 1.01E+08 | KD2-H4K8ac_peak_9123 | 5.9696   |                              |
| 14 | 101148383 | 1.01E+08 | KD2-H4K8ac_peak_9124 | 5.00593  |                              |
| 14 | 101150913 | 1.01E+08 | KD2-H4K8ac_peak_9125 | 3.75035  |                              |
| 14 | 101153179 | 1.01E+08 | KD2-H4K8ac_peak_9126 | 15.09202 |                              |
| 14 | 101155085 | 1.01E+08 | KD2-H4K8ac_peak_9127 | 6.04107  |                              |
| 14 | 101156877 | 1.01E+08 | KD2-H4K8ac_peak_9128 | 12.00273 |                              |
| 14 | 101158954 | 1.01E+08 | KD2-H4K8ac_peak_9129 | 9.36516  |                              |
| 14 | 101160667 | 1.01E+08 | KD2-H4K8ac_peak_9130 | 5.56396  |                              |
| 14 | 101163423 | 1.01E+08 | KD2-H4K8ac_peak_9131 | 6.65673  |                              |
| 14 | 101164402 | 1.01E+08 | KD2-H4K8ac_peak_9132 | 5.9696   |                              |
| 14 | 101164937 | 1.01E+08 | KD2-H4K8ac_peak_9133 | 7.93362  |                              |
| 14 | 101172466 | 1.01E+08 | KD2-H4K8ac_peak_9134 | 6.99815  |                              |
| 14 | 101175007 | 1.01E+08 | KD2-H4K8ac_peak_9135 | 15.58442 |                              |
| 14 | 101177328 | 1.01E+08 | KD2-H4K8ac_peak_9136 | 10.87093 |                              |
| 14 | 101189148 | 1.01E+08 | KD2-H4K8ac_peak_9137 | 8.52559  |                              |
| 14 | 101192645 | 1.01E+08 | KD2-H4K8ac_peak_9138 | 7.96322  | DLK1_ENSG00000185559         |
| 14 | 101193289 | 1.01E+08 | KD2-H4K8ac_peak_9139 | 5.9696   |                              |
| 14 | 101194260 | 1.01E+08 | KD2-H4K8ac_peak_9140 | 5.14125  |                              |
| 14 | 101195083 | 1.01E+08 | KD2-H4K8ac_peak_9141 | 6.25869  |                              |
| 14 | 101196785 | 1.01E+08 | KD2-H4K8ac_peak_9142 | 5.14125  |                              |
| 14 | 101234462 | 1.01E+08 | KD2-H4K8ac_peak_9143 | 6.65673  |                              |
| 14 | 101235370 | 1.01E+08 | KD2-H4K8ac_peak_9144 | 9.36516  |                              |
| 14 | 101236607 | 1.01E+08 | KD2-H4K8ac_peak_9145 | 18.7894  |                              |
| 14 | 101237907 | 1.01E+08 | KD2-H4K8ac_peak_9146 | 16.49944 |                              |
| 14 | 101241831 | 1.01E+08 | KD2-H4K8ac_peak_9147 | 22.32344 |                              |
| 14 | 101244471 | 1.01E+08 | KD2-H4K8ac_peak_9148 | 24.23593 | MEG3_ENSG00000214548         |
| 14 | 101249371 | 1.01E+08 | KD2-H4K8ac_peak_9149 | 29.27429 |                              |
| 14 | 101250754 | 1.01E+08 | KD2-H4K8ac_peak_9150 | 17.8868  |                              |
| 14 | 101253522 | 1.01E+08 | KD2-H4K8ac_peak_9151 | 3.97079  |                              |
| 14 | 101254921 | 1.01E+08 | KD2-H4K8ac_peak_9152 | 8.52881  |                              |

|    |           |          |                      |          |                              |
|----|-----------|----------|----------------------|----------|------------------------------|
| 14 | 101289994 | 1.01E+08 | KD2-H4K8ac_peak_9153 | 5.54647  |                              |
| 14 | 101306065 | 1.01E+08 | KD2-H4K8ac_peak_9154 | 6.05809  |                              |
| 14 | 101306766 | 1.01E+08 | KD2-H4K8ac_peak_9155 | 11.77304 |                              |
| 14 | 101308160 | 1.01E+08 | KD2-H4K8ac_peak_9156 | 14.69247 |                              |
| 14 | 101311302 | 1.01E+08 | KD2-H4K8ac_peak_9157 | 7.13615  |                              |
| 14 | 101363053 | 1.01E+08 | KD2-H4K8ac_peak_9158 | 11.03331 |                              |
| 14 | 101364909 | 1.01E+08 | KD2-H4K8ac_peak_9159 | 16.57619 |                              |
| 14 | 101366155 | 1.01E+08 | KD2-H4K8ac_peak_9160 | 6.99815  |                              |
| 14 | 101366704 | 1.01E+08 | KD2-H4K8ac_peak_9161 | 11.04256 | AL117190.1_ENSG00000221077   |
| 14 | 101371078 | 1.01E+08 | KD2-H4K8ac_peak_9162 | 12.46522 |                              |
| 14 | 101371602 | 1.01E+08 | KD2-H4K8ac_peak_9163 | 7.76329  |                              |
| 14 | 101472536 | 1.01E+08 | KD2-H4K8ac_peak_9164 | 5.14125  |                              |
| 14 | 101474296 | 1.01E+08 | KD2-H4K8ac_peak_9165 | 11.90231 |                              |
| 14 | 101475950 | 1.01E+08 | KD2-H4K8ac_peak_9166 | 10.29842 |                              |
| 14 | 101538975 | 1.02E+08 | KD2-H4K8ac_peak_9167 | 14.60723 |                              |
| 14 | 101539993 | 1.02E+08 | KD2-H4K8ac_peak_9168 | 10.53377 |                              |
| 14 | 101577870 | 1.02E+08 | KD2-H4K8ac_peak_9169 | 8.23274  |                              |
| 14 | 101592336 | 1.02E+08 | KD2-H4K8ac_peak_9170 | 8.05311  |                              |
| 14 | 101593062 | 1.02E+08 | KD2-H4K8ac_peak_9171 | 12.84642 |                              |
| 14 | 101597200 | 1.02E+08 | KD2-H4K8ac_peak_9172 | 9.9302   |                              |
| 14 | 101597870 | 1.02E+08 | KD2-H4K8ac_peak_9173 | 13.07128 |                              |
| 14 | 101601205 | 1.02E+08 | KD2-H4K8ac_peak_9174 | 8.37231  |                              |
| 14 | 101601921 | 1.02E+08 | KD2-H4K8ac_peak_9175 | 9.1707   |                              |
| 14 | 101603425 | 1.02E+08 | KD2-H4K8ac_peak_9176 | 6.90458  |                              |
| 14 | 101616401 | 1.02E+08 | KD2-H4K8ac_peak_9177 | 3.75035  |                              |
| 14 | 101642397 | 1.02E+08 | KD2-H4K8ac_peak_9178 | 4.66652  |                              |
| 14 | 101690095 | 1.02E+08 | KD2-H4K8ac_peak_9179 | 4.211    |                              |
| 14 | 101691566 | 1.02E+08 | KD2-H4K8ac_peak_9180 | 7.30812  |                              |
| 14 | 101696761 | 1.02E+08 | KD2-H4K8ac_peak_9181 | 13.95627 |                              |
| 14 | 101699325 | 1.02E+08 | KD2-H4K8ac_peak_9182 | 9.1707   |                              |
| 14 | 101701351 | 1.02E+08 | KD2-H4K8ac_peak_9183 | 6.35843  |                              |
| 14 | 101925251 | 1.02E+08 | KD2-H4K8ac_peak_9184 | 5.9696   |                              |
| 14 | 101992195 | 1.02E+08 | KD2-H4K8ac_peak_9185 | 7.32463  |                              |
| 14 | 102050840 | 1.02E+08 | KD2-H4K8ac_peak_9186 | 8.85813  |                              |
| 14 | 102055876 | 1.02E+08 | KD2-H4K8ac_peak_9187 | 11.24702 |                              |
| 14 | 102088790 | 1.02E+08 | KD2-H4K8ac_peak_9188 | 4.67342  |                              |
| 14 | 102093989 | 1.02E+08 | KD2-H4K8ac_peak_9189 | 7.36799  |                              |
| 14 | 102095008 | 1.02E+08 | KD2-H4K8ac_peak_9190 | 12.08081 |                              |
| 14 | 102095643 | 1.02E+08 | KD2-H4K8ac_peak_9191 | 13.81781 |                              |
| 14 | 102173217 | 1.02E+08 | KD2-H4K8ac_peak_9192 | 11.24422 |                              |
| 14 | 102174162 | 1.02E+08 | KD2-H4K8ac_peak_9193 | 6.30229  |                              |
| 14 | 102241874 | 1.02E+08 | KD2-H4K8ac_peak_9194 | 5.54647  |                              |
| 14 | 102247424 | 1.02E+08 | KD2-H4K8ac_peak_9195 | 12.74514 |                              |
| 14 | 102278585 | 1.02E+08 | KD2-H4K8ac_peak_9196 | 4.54838  |                              |
| 14 | 102305245 | 1.02E+08 | KD2-H4K8ac_peak_9197 | 10.05606 | CTD-2017C7.1_ENSG00000256705 |
| 14 | 102307698 | 1.02E+08 | KD2-H4K8ac_peak_9198 | 20.02161 |                              |

|    |           |          |                      |          |                                                   |
|----|-----------|----------|----------------------|----------|---------------------------------------------------|
| 14 | 102325435 | 1.02E+08 | KD2-H4K8ac_peak_9199 | 7.27716  |                                                   |
| 14 | 102343443 | 1.02E+08 | KD2-H4K8ac_peak_9200 | 8.59579  |                                                   |
| 14 | 102413245 | 1.02E+08 | KD2-H4K8ac_peak_9201 | 7.51054  | RP11-1017G21.5_ENSG00000271780                    |
| 14 | 102414704 | 1.02E+08 | KD2-H4K8ac_peak_9202 | 13.50024 | RP11-1017G21.5_ENSG00000271780                    |
| 14 | 102428252 | 1.02E+08 | KD2-H4K8ac_peak_9203 | 7.01494  |                                                   |
| 14 | 102429013 | 1.02E+08 | KD2-H4K8ac_peak_9204 | 6.30626  |                                                   |
| 14 | 102431167 | 1.02E+08 | KD2-H4K8ac_peak_9205 | 9.65086  | DYNC1H1_ENSG00000197102                           |
| 14 | 102552935 | 1.03E+08 | KD2-H4K8ac_peak_9206 | 6.40297  |                                                   |
| 14 | 102553666 | 1.03E+08 | KD2-H4K8ac_peak_9207 | 17.8868  |                                                   |
| 14 | 102606289 | 1.03E+08 | KD2-H4K8ac_peak_9208 | 7.51054  | HSP90AA1_ENSG00000080824;WDR20_ENSG00000140153    |
| 14 | 102638875 | 1.03E+08 | KD2-H4K8ac_peak_9209 | 6.16888  |                                                   |
| 14 | 102652956 | 1.03E+08 | KD2-H4K8ac_peak_9210 | 7.47462  |                                                   |
| 14 | 102653871 | 1.03E+08 | KD2-H4K8ac_peak_9211 | 7.27716  |                                                   |
| 14 | 102656304 | 1.03E+08 | KD2-H4K8ac_peak_9212 | 5.51783  |                                                   |
| 14 | 102729378 | 1.03E+08 | KD2-H4K8ac_peak_9213 | 13.81781 |                                                   |
| 14 | 102780763 | 1.03E+08 | KD2-H4K8ac_peak_9214 | 8.33304  |                                                   |
| 14 | 102782897 | 1.03E+08 | KD2-H4K8ac_peak_9215 | 5.13893  | ZNF839_ENSG00000022976                            |
| 14 | 102783636 | 1.03E+08 | KD2-H4K8ac_peak_9216 | 9.08816  | ZNF839_ENSG00000022976                            |
| 14 | 102785773 | 1.03E+08 | KD2-H4K8ac_peak_9217 | 12.93253 |                                                   |
| 14 | 102829384 | 1.03E+08 | KD2-H4K8ac_peak_9218 | 10.29842 | CINP_ENSG00000100865;TECPR2_ENSG00000196663       |
| 14 | 102976408 | 1.03E+08 | KD2-H4K8ac_peak_9219 | 9.1707   | ANKRD9_ENSG00000156381                            |
| 14 | 102982986 | 1.03E+08 | KD2-H4K8ac_peak_9220 | 18.59584 |                                                   |
| 14 | 102990398 | 1.03E+08 | KD2-H4K8ac_peak_9221 | 18.94636 |                                                   |
| 14 | 102991308 | 1.03E+08 | KD2-H4K8ac_peak_9222 | 4.86324  |                                                   |
| 14 | 103005106 | 1.03E+08 | KD2-H4K8ac_peak_9223 | 4.56666  | MIR4309_ENSG00000266015                           |
| 14 | 103006576 | 1.03E+08 | KD2-H4K8ac_peak_9224 | 7.07117  | MIR4309_ENSG00000266015                           |
| 14 | 103012036 | 1.03E+08 | KD2-H4K8ac_peak_9225 | 5.88845  | CTD-2555C10.3_ENSG00000259230                     |
| 14 | 103043884 | 1.03E+08 | KD2-H4K8ac_peak_9226 | 5.57044  |                                                   |
| 14 | 103046402 | 1.03E+08 | KD2-H4K8ac_peak_9227 | 8.94469  |                                                   |
| 14 | 103057966 | 1.03E+08 | KD2-H4K8ac_peak_9228 | 12.82393 | RCOR1_ENSG00000089902                             |
| 14 | 103150110 | 1.03E+08 | KD2-H4K8ac_peak_9229 | 5.57044  |                                                   |
| 14 | 103315121 | 1.03E+08 | KD2-H4K8ac_peak_9230 | 5.88845  |                                                   |
| 14 | 103315911 | 1.03E+08 | KD2-H4K8ac_peak_9231 | 5.7068   |                                                   |
| 14 | 103396294 | 1.03E+08 | KD2-H4K8ac_peak_9232 | 6.30229  |                                                   |
| 14 | 103523301 | 1.04E+08 | KD2-H4K8ac_peak_9233 | 6.44277  | CDC42BPB_ENSG00000198752                          |
| 14 | 103541739 | 1.04E+08 | KD2-H4K8ac_peak_9234 | 11.79585 |                                                   |
| 14 | 103542342 | 1.04E+08 | KD2-H4K8ac_peak_9235 | 8.79106  |                                                   |
| 14 | 103557409 | 1.04E+08 | KD2-H4K8ac_peak_9236 | 20.88898 |                                                   |
| 14 | 103578774 | 1.04E+08 | KD2-H4K8ac_peak_9237 | 5.82799  |                                                   |
| 14 | 103587609 | 1.04E+08 | KD2-H4K8ac_peak_9238 | 8.86099  | LINC00677_ENSG00000259717;TNFAIP2_ENSG00000185215 |
| 14 | 103590330 | 1.04E+08 | KD2-H4K8ac_peak_9239 | 4.8888   | LINC00677_ENSG00000259717;TNFAIP2_ENSG00000185215 |
| 14 | 103593090 | 1.04E+08 | KD2-H4K8ac_peak_9240 | 8.85813  |                                                   |
| 14 | 103593615 | 1.04E+08 | KD2-H4K8ac_peak_9241 | 7.43893  |                                                   |
| 14 | 103598689 | 1.04E+08 | KD2-H4K8ac_peak_9242 | 9.09777  |                                                   |
| 14 | 103617912 | 1.04E+08 | KD2-H4K8ac_peak_9243 | 6.94954  |                                                   |
| 14 | 103673761 | 1.04E+08 | KD2-H4K8ac_peak_9244 | 9.95119  | RP11-736N17.9_ENSG00000270705                     |

|    |           |          |                      |          |                                                                                               |
|----|-----------|----------|----------------------|----------|-----------------------------------------------------------------------------------------------|
| 14 | 103701648 | 1.04E+08 | KD2-H4K8ac_peak_9245 | 4.73064  |                                                                                               |
| 14 | 103726190 | 1.04E+08 | KD2-H4K8ac_peak_9246 | 6.99815  |                                                                                               |
| 14 | 103744417 | 1.04E+08 | KD2-H4K8ac_peak_9247 | 4.01115  | RAP2CP1_ENSG00000270938                                                                       |
| 14 | 103745068 | 1.04E+08 | KD2-H4K8ac_peak_9248 | 11.29366 | RAP2CP1_ENSG00000270938                                                                       |
| 14 | 103799649 | 1.04E+08 | KD2-H4K8ac_peak_9249 | 23.33626 | RP11-45P15.4_ENSG00000259775;EIF5_ENSG00000100664                                             |
| 14 | 103800613 | 1.04E+08 | KD2-H4K8ac_peak_9250 | 8.58725  | EIF5_ENSG00000100664                                                                          |
| 14 | 103840901 | 1.04E+08 | KD2-H4K8ac_peak_9251 | 6.60096  | RP11-600F24.1_ENSG00000243904                                                                 |
| 14 | 103850823 | 1.04E+08 | KD2-H4K8ac_peak_9252 | 16.822   | MARK3_ENSG00000075413                                                                         |
| 14 | 103851781 | 1.04E+08 | KD2-H4K8ac_peak_9253 | 6.0605   | MARK3_ENSG00000075413                                                                         |
| 14 | 103985218 | 1.04E+08 | KD2-H4K8ac_peak_9254 | 4.40553  |                                                                                               |
| 14 | 103987684 | 1.04E+08 | KD2-H4K8ac_peak_9255 | 4.67342  |                                                                                               |
| 14 | 103988643 | 1.04E+08 | KD2-H4K8ac_peak_9256 | 5.20908  | CKB_ENSG00000166165                                                                           |
| 14 | 103989334 | 1.04E+08 | KD2-H4K8ac_peak_9257 | 13.73635 | CKB_ENSG00000166165                                                                           |
| 14 | 103994415 | 1.04E+08 | KD2-H4K8ac_peak_9258 | 6.40297  | RP11-600F24.7_ENSG00000260285;TRMT61A_ENSG00000166166                                         |
| 14 | 103995595 | 1.04E+08 | KD2-H4K8ac_peak_9259 | 8.2413   | RP11-600F24.7_ENSG00000260285;TRMT61A_ENSG00000166166                                         |
| 14 | 104028499 | 1.04E+08 | KD2-H4K8ac_peak_9260 | 16.64426 | BAG5_ENSG00000166170;KLC1_ENSG00000126214;RP11-73M18.2_ENSG00000256500;APOPT1_ENSG00000256053 |
| 14 | 104094469 | 1.04E+08 | KD2-H4K8ac_peak_9261 | 16.57619 |                                                                                               |
| 14 | 104096102 | 1.04E+08 | KD2-H4K8ac_peak_9262 | 10.95611 |                                                                                               |
| 14 | 104163062 | 1.04E+08 | KD2-H4K8ac_peak_9263 | 4.77079  | RP11-73M18.8_ENSG00000269958                                                                  |
| 14 | 104181360 | 1.04E+08 | KD2-H4K8ac_peak_9264 | 8.04448  | XRCC3_ENSG00000126215;ZFYVE21_ENSG00000100711                                                 |
| 14 | 104182401 | 1.04E+08 | KD2-H4K8ac_peak_9265 | 8.58069  | XRCC3_ENSG00000126215;ZFYVE21_ENSG00000100711                                                 |
| 14 | 104314156 | 1.04E+08 | KD2-H4K8ac_peak_9266 | 6.66359  | PPP1R13B_ENSG00000088808;LINC00637_ENSG00000258735                                            |
| 14 | 104321338 | 1.04E+08 | KD2-H4K8ac_peak_9267 | 7.49599  |                                                                                               |
| 14 | 104336352 | 1.04E+08 | KD2-H4K8ac_peak_9268 | 7.27716  |                                                                                               |
| 14 | 104346146 | 1.04E+08 | KD2-H4K8ac_peak_9269 | 6.36375  | CTD-2134A5.4_ENSG00000258534                                                                  |
| 14 | 104347100 | 1.04E+08 | KD2-H4K8ac_peak_9270 | 11.24702 | CTD-2134A5.4_ENSG00000258534                                                                  |
| 14 | 104348047 | 1.04E+08 | KD2-H4K8ac_peak_9271 | 11.09936 |                                                                                               |
| 14 | 104349044 | 1.04E+08 | KD2-H4K8ac_peak_9272 | 11.05467 |                                                                                               |
| 14 | 104389528 | 1.04E+08 | KD2-H4K8ac_peak_9273 | 7.10552  |                                                                                               |
| 14 | 104427284 | 1.04E+08 | KD2-H4K8ac_peak_9274 | 6.40683  |                                                                                               |
| 14 | 104560407 | 1.05E+08 | KD2-H4K8ac_peak_9275 | 8.86099  |                                                                                               |
| 14 | 104601300 | 1.05E+08 | KD2-H4K8ac_peak_9276 | 6.24114  |                                                                                               |
| 14 | 104601955 | 1.05E+08 | KD2-H4K8ac_peak_9277 | 6.98244  |                                                                                               |
| 14 | 104602778 | 1.05E+08 | KD2-H4K8ac_peak_9278 | 4.30033  | CTD-2223O18.1_ENSG00000258748                                                                 |
| 14 | 104603601 | 1.05E+08 | KD2-H4K8ac_peak_9279 | 4.49087  | CTD-2223O18.1_ENSG00000258748                                                                 |
| 14 | 104604121 | 1.05E+08 | KD2-H4K8ac_peak_9280 | 9.63487  | CTD-2223O18.1_ENSG00000258748;KIF26A_ENSG00000066735                                          |
| 14 | 104604928 | 1.05E+08 | KD2-H4K8ac_peak_9281 | 5.38581  | CTD-2223O18.1_ENSG00000258748;KIF26A_ENSG00000066735                                          |
| 14 | 104613328 | 1.05E+08 | KD2-H4K8ac_peak_9282 | 7.02364  |                                                                                               |
| 14 | 104615056 | 1.05E+08 | KD2-H4K8ac_peak_9283 | 19.1417  |                                                                                               |
| 14 | 104616904 | 1.05E+08 | KD2-H4K8ac_peak_9284 | 7.92775  |                                                                                               |
| 14 | 104623961 | 1.05E+08 | KD2-H4K8ac_peak_9285 | 10.01546 |                                                                                               |
| 14 | 104625608 | 1.05E+08 | KD2-H4K8ac_peak_9286 | 5.64429  |                                                                                               |
| 14 | 104626044 | 1.05E+08 | KD2-H4K8ac_peak_9287 | 4.68059  |                                                                                               |
| 14 | 104626613 | 1.05E+08 | KD2-H4K8ac_peak_9288 | 5.56864  |                                                                                               |
| 14 | 104649493 | 1.05E+08 | KD2-H4K8ac_peak_9289 | 4.00051  |                                                                                               |
| 14 | 104650304 | 1.05E+08 | KD2-H4K8ac_peak_9290 | 7.47462  |                                                                                               |

|    |           |          |                      |          |                               |
|----|-----------|----------|----------------------|----------|-------------------------------|
| 14 | 104651216 | 1.05E+08 | KD2-H4K8ac_peak_9291 | 5.88845  |                               |
| 14 | 104661940 | 1.05E+08 | KD2-H4K8ac_peak_9292 | 4.75875  |                               |
| 14 | 104667041 | 1.05E+08 | KD2-H4K8ac_peak_9293 | 13.9152  |                               |
| 14 | 104672019 | 1.05E+08 | KD2-H4K8ac_peak_9294 | 7.76329  |                               |
| 14 | 104673231 | 1.05E+08 | KD2-H4K8ac_peak_9295 | 11.82518 |                               |
| 14 | 104682333 | 1.05E+08 | KD2-H4K8ac_peak_9296 | 4.53319  |                               |
| 14 | 104686085 | 1.05E+08 | KD2-H4K8ac_peak_9297 | 6.10575  |                               |
| 14 | 104687124 | 1.05E+08 | KD2-H4K8ac_peak_9298 | 15.61313 |                               |
| 14 | 104688771 | 1.05E+08 | KD2-H4K8ac_peak_9299 | 24.17855 | RP11-260M19.2_ENSG00000258913 |
| 14 | 104689964 | 1.05E+08 | KD2-H4K8ac_peak_9300 | 23.04547 | RP11-260M19.2_ENSG00000258913 |
| 14 | 104690733 | 1.05E+08 | KD2-H4K8ac_peak_9301 | 30.09832 | RP11-260M19.2_ENSG00000258913 |
| 14 | 104692023 | 1.05E+08 | KD2-H4K8ac_peak_9302 | 4.67342  |                               |
| 14 | 104741752 | 1.05E+08 | KD2-H4K8ac_peak_9303 | 8.44476  |                               |
| 14 | 104746196 | 1.05E+08 | KD2-H4K8ac_peak_9304 | 8.55271  |                               |
| 14 | 104747092 | 1.05E+08 | KD2-H4K8ac_peak_9305 | 5.9696   |                               |
| 14 | 104757136 | 1.05E+08 | KD2-H4K8ac_peak_9306 | 14.68449 |                               |
| 14 | 104758660 | 1.05E+08 | KD2-H4K8ac_peak_9307 | 24.56058 |                               |
| 14 | 104760582 | 1.05E+08 | KD2-H4K8ac_peak_9308 | 22.32344 |                               |
| 14 | 104763242 | 1.05E+08 | KD2-H4K8ac_peak_9309 | 20.30085 |                               |
| 14 | 104768037 | 1.05E+08 | KD2-H4K8ac_peak_9310 | 8.3771   |                               |
| 14 | 104769375 | 1.05E+08 | KD2-H4K8ac_peak_9311 | 5.14125  |                               |
| 14 | 104821556 | 1.05E+08 | KD2-H4K8ac_peak_9312 | 9.1707   |                               |
| 14 | 104822308 | 1.05E+08 | KD2-H4K8ac_peak_9313 | 5.54647  |                               |
| 14 | 104834365 | 1.05E+08 | KD2-H4K8ac_peak_9314 | 7.47462  |                               |
| 14 | 104835184 | 1.05E+08 | KD2-H4K8ac_peak_9315 | 5.9696   |                               |
| 14 | 104836449 | 1.05E+08 | KD2-H4K8ac_peak_9316 | 8.52881  |                               |
| 14 | 104849745 | 1.05E+08 | KD2-H4K8ac_peak_9317 | 13.73635 |                               |
| 14 | 104887689 | 1.05E+08 | KD2-H4K8ac_peak_9318 | 8.56219  |                               |
| 14 | 104888301 | 1.05E+08 | KD2-H4K8ac_peak_9319 | 6.83936  |                               |
| 14 | 104890505 | 1.05E+08 | KD2-H4K8ac_peak_9320 | 7.38799  |                               |
| 14 | 104891752 | 1.05E+08 | KD2-H4K8ac_peak_9321 | 4.211    |                               |
| 14 | 104893512 | 1.05E+08 | KD2-H4K8ac_peak_9322 | 7.40314  |                               |
| 14 | 104902228 | 1.05E+08 | KD2-H4K8ac_peak_9323 | 15.76765 |                               |
| 14 | 104927293 | 1.05E+08 | KD2-H4K8ac_peak_9324 | 13.81781 |                               |
| 14 | 104928060 | 1.05E+08 | KD2-H4K8ac_peak_9325 | 22.07309 |                               |
| 14 | 104976420 | 1.05E+08 | KD2-H4K8ac_peak_9326 | 4.54037  |                               |
| 14 | 104977083 | 1.05E+08 | KD2-H4K8ac_peak_9327 | 11.86082 |                               |
| 14 | 105020925 | 1.05E+08 | KD2-H4K8ac_peak_9328 | 5.51783  |                               |
| 14 | 105028544 | 1.05E+08 | KD2-H4K8ac_peak_9329 | 6.40425  |                               |
| 14 | 105029561 | 1.05E+08 | KD2-H4K8ac_peak_9330 | 22.59108 |                               |
| 14 | 105032500 | 1.05E+08 | KD2-H4K8ac_peak_9331 | 6.48242  |                               |
| 14 | 105033907 | 1.05E+08 | KD2-H4K8ac_peak_9332 | 6.30229  |                               |
| 14 | 105046770 | 1.05E+08 | KD2-H4K8ac_peak_9333 | 9.91109  | C14orf180_ENSG00000184601     |
| 14 | 105047649 | 1.05E+08 | KD2-H4K8ac_peak_9334 | 14.07846 |                               |
| 14 | 105050588 | 1.05E+08 | KD2-H4K8ac_peak_9335 | 5.9696   |                               |
| 14 | 105053493 | 1.05E+08 | KD2-H4K8ac_peak_9336 | 14.96478 |                               |

|    |           |          |                      |          |                                                     |
|----|-----------|----------|----------------------|----------|-----------------------------------------------------|
| 14 | 105055409 | 1.05E+08 | KD2-H4K8ac_peak_9337 | 6.76298  | RP11-614O9.1_ENSG00000259037                        |
| 14 | 105065985 | 1.05E+08 | KD2-H4K8ac_peak_9338 | 9.36516  |                                                     |
| 14 | 105067099 | 1.05E+08 | KD2-H4K8ac_peak_9339 | 6.7498   |                                                     |
| 14 | 105067777 | 1.05E+08 | KD2-H4K8ac_peak_9340 | 5.96443  |                                                     |
| 14 | 105070663 | 1.05E+08 | KD2-H4K8ac_peak_9341 | 7.9265   | TMEM179_ENSG00000258986                             |
| 14 | 105071416 | 1.05E+08 | KD2-H4K8ac_peak_9342 | 8.30094  | TMEM179_ENSG00000258986                             |
| 14 | 105106118 | 1.05E+08 | KD2-H4K8ac_peak_9343 | 6.0073   |                                                     |
| 14 | 105106612 | 1.05E+08 | KD2-H4K8ac_peak_9344 | 15.22643 |                                                     |
| 14 | 105116455 | 1.05E+08 | KD2-H4K8ac_peak_9345 | 10.19949 |                                                     |
| 14 | 105155348 | 1.05E+08 | KD2-H4K8ac_peak_9346 | 10.46264 | INF2_ENSG00000203485;RP11-982M15.5_ENSG00000258858  |
| 14 | 105190446 | 1.05E+08 | KD2-H4K8ac_peak_9347 | 12.47162 | ADSSL1_ENSG00000185100                              |
| 14 | 105191012 | 1.05E+08 | KD2-H4K8ac_peak_9348 | 8.56219  | ADSSL1_ENSG00000185100                              |
| 14 | 105218531 | 1.05E+08 | KD2-H4K8ac_peak_9349 | 9.26408  | SIVA1_ENSG00000184990                               |
| 14 | 105261143 | 1.05E+08 | KD2-H4K8ac_peak_9350 | 10.59312 | AKT1_ENSG00000142208                                |
| 14 | 105262192 | 1.05E+08 | KD2-H4K8ac_peak_9351 | 14.81929 | AKT1_ENSG00000142208                                |
| 14 | 105265945 | 1.05E+08 | KD2-H4K8ac_peak_9352 | 20.2903  | ZBTB42_ENSG00000179627                              |
| 14 | 105282022 | 1.05E+08 | KD2-H4K8ac_peak_9353 | 9.1707   |                                                     |
| 14 | 105282514 | 1.05E+08 | KD2-H4K8ac_peak_9354 | 20.97251 |                                                     |
| 14 | 105292123 | 1.05E+08 | KD2-H4K8ac_peak_9355 | 10.94736 |                                                     |
| 14 | 105293806 | 1.05E+08 | KD2-H4K8ac_peak_9356 | 6.97919  |                                                     |
| 14 | 105331072 | 1.05E+08 | KD2-H4K8ac_peak_9357 | 8.55271  | CEP170B_ENSG00000099814                             |
| 14 | 105332001 | 1.05E+08 | KD2-H4K8ac_peak_9358 | 7.13615  | CEP170B_ENSG00000099814                             |
| 14 | 105348961 | 1.05E+08 | KD2-H4K8ac_peak_9359 | 5.05318  |                                                     |
| 14 | 105399365 | 1.05E+08 | KD2-H4K8ac_peak_9360 | 14.17488 |                                                     |
| 14 | 105445006 | 1.05E+08 | KD2-H4K8ac_peak_9361 | 6.56211  | AHNAK2_ENSG00000185567                              |
| 14 | 105451201 | 1.05E+08 | KD2-H4K8ac_peak_9362 | 7.51945  | C14orf79_ENSG00000140104                            |
| 14 | 105486873 | 1.05E+08 | KD2-H4K8ac_peak_9363 | 9.08816  | CDCA4_ENSG00000170779                               |
| 14 | 105496620 | 1.05E+08 | KD2-H4K8ac_peak_9364 | 8.17902  |                                                     |
| 14 | 105525042 | 1.06E+08 | KD2-H4K8ac_peak_9365 | 7.22457  |                                                     |
| 14 | 105527636 | 1.06E+08 | KD2-H4K8ac_peak_9366 | 6.48713  |                                                     |
| 14 | 105559180 | 1.06E+08 | KD2-H4K8ac_peak_9367 | 17.38513 | RP11-44N21.1_ENSG00000257556                        |
| 14 | 105647147 | 1.06E+08 | KD2-H4K8ac_peak_9368 | 10.30284 | RP11-44N21.4_ENSG00000257622;NUDT14_ENSG00000183828 |
| 14 | 105714219 | 1.06E+08 | KD2-H4K8ac_peak_9369 | 4.86324  | BTBD6_ENSG00000184887                               |
| 14 | 105759365 | 1.06E+08 | KD2-H4K8ac_peak_9370 | 8.36432  |                                                     |
| 14 | 105767085 | 1.06E+08 | KD2-H4K8ac_peak_9371 | 10.53377 | PACS2_ENSG00000179364                               |
| 14 | 105768011 | 1.06E+08 | KD2-H4K8ac_peak_9372 | 6.66692  |                                                     |
| 14 | 105779629 | 1.06E+08 | KD2-H4K8ac_peak_9373 | 12.82393 |                                                     |
| 14 | 105781261 | 1.06E+08 | KD2-H4K8ac_peak_9374 | 7.47462  | BRF1_ENSG00000185024                                |
| 14 | 105790938 | 1.06E+08 | KD2-H4K8ac_peak_9375 | 5.29352  |                                                     |
| 14 | 105864002 | 1.06E+08 | KD2-H4K8ac_peak_9376 | 21.09577 | TEX22_ENSG00000226174                               |
| 14 | 105877521 | 1.06E+08 | KD2-H4K8ac_peak_9377 | 11.89502 |                                                     |
| 14 | 105881106 | 1.06E+08 | KD2-H4K8ac_peak_9378 | 12.00273 |                                                     |
| 14 | 105885442 | 1.06E+08 | KD2-H4K8ac_peak_9379 | 33.81557 | RP11-521B24.3_ENSG00000251602;MTA1_ENSG00000182979  |
| 14 | 105886763 | 1.06E+08 | KD2-H4K8ac_peak_9380 | 8.55271  | RP11-521B24.3_ENSG00000251602;MTA1_ENSG00000182979  |
| 14 | 105887952 | 1.06E+08 | KD2-H4K8ac_peak_9381 | 7.40314  |                                                     |
| 14 | 105937363 | 1.06E+08 | KD2-H4K8ac_peak_9382 | 5.13615  | RP11-521B24.5_ENSG00000257270                       |



|    |           |          |                      |          |                                                                               |
|----|-----------|----------|----------------------|----------|-------------------------------------------------------------------------------|
| 14 | 105938182 | 1.06E+08 | KD2-H4K8ac_peak_9383 | 6.43014  | CRIP2_ENSG00000182809                                                         |
| 14 | 105938874 | 1.06E+08 | KD2-H4K8ac_peak_9384 | 6.4562   | CRIP2_ENSG00000182809                                                         |
| 14 | 105940006 | 1.06E+08 | KD2-H4K8ac_peak_9385 | 12.74183 | CRIP2_ENSG00000182809                                                         |
| 14 | 105941213 | 1.06E+08 | KD2-H4K8ac_peak_9386 | 9.20193  |                                                                               |
| 14 | 105943069 | 1.06E+08 | KD2-H4K8ac_peak_9387 | 15.61313 |                                                                               |
| 14 | 105947444 | 1.06E+08 | KD2-H4K8ac_peak_9388 | 8.16906  |                                                                               |
| 14 | 105948751 | 1.06E+08 | KD2-H4K8ac_peak_9389 | 3.90565  |                                                                               |
| 14 | 105951796 | 1.06E+08 | KD2-H4K8ac_peak_9390 | 7.44324  | CRIP1_ENSG00000213145;CRIP1_ENSG00000257341                                   |
| 14 | 105956231 | 1.06E+08 | KD2-H4K8ac_peak_9391 | 13.13969 | C14orf80_ENSG00000185347                                                      |
| 14 | 105992373 | 1.06E+08 | KD2-H4K8ac_peak_9392 | 5.88845  | TMEM121_ENSG00000184986                                                       |
| 14 | 105993166 | 1.06E+08 | KD2-H4K8ac_peak_9393 | 9.83789  | TMEM121_ENSG00000184986                                                       |
| 14 | 106004175 | 1.06E+08 | KD2-H4K8ac_peak_9394 | 4.86324  | ATP5G1P1_ENSG00000230157                                                      |
| 14 | 106025703 | 1.06E+08 | KD2-H4K8ac_peak_9395 | 6.40297  |                                                                               |
| 14 | 106146197 | 1.06E+08 | KD2-H4K8ac_peak_9396 | 9.15329  |                                                                               |
| 14 | 106854923 | 1.07E+08 | KD2-H4K8ac_peak_9397 | 11.15509 |                                                                               |
| 14 | 106936170 | 1.07E+08 | KD2-H4K8ac_peak_9398 | 11.04694 |                                                                               |
| 14 | 106938104 | 1.07E+08 | KD2-H4K8ac_peak_9399 | 20.02161 | LINC00221_ENSG00000187156                                                     |
| 15 | 22544590  | 22545178 | KD2-H4K8ac_peak_9400 | 5.57044  | RP11-603B24.2_ENSG00000259098                                                 |
| 15 | 22832889  | 22833142 | KD2-H4K8ac_peak_9401 | 10.65724 | TUBGCP5_ENSG00000153575                                                       |
| 15 | 22833537  | 22833985 | KD2-H4K8ac_peak_9402 | 21.60954 | TUBGCP5_ENSG00000153575                                                       |
| 15 | 22892166  | 22892544 | KD2-H4K8ac_peak_9403 | 8.4716   | CYFIP1_ENSG0000068793                                                         |
| 15 | 23034120  | 23034323 | KD2-H4K8ac_peak_9404 | 9.96798  | NIPA2_ENSG00000140157                                                         |
| 15 | 23034699  | 23035233 | KD2-H4K8ac_peak_9405 | 10.21366 | NIPA2_ENSG00000140157                                                         |
| 15 | 23085933  | 23086156 | KD2-H4K8ac_peak_9406 | 7.36799  |                                                                               |
| 15 | 23086689  | 23087002 | KD2-H4K8ac_peak_9407 | 5.14125  |                                                                               |
| 15 | 23114997  | 23115201 | KD2-H4K8ac_peak_9408 | 9.08816  | RP11-566K19.6_ENSG00000259344                                                 |
| 15 | 23810864  | 23811177 | KD2-H4K8ac_peak_9409 | 10.21502 | MKRN3_ENSG00000179455                                                         |
| 15 | 25683677  | 25684091 | KD2-H4K8ac_peak_9410 | 17.27647 | UBE3A_ENSG00000114062                                                         |
| 15 | 25684422  | 25684769 | KD2-H4K8ac_peak_9411 | 11.05407 | UBE3A_ENSG00000114062                                                         |
| 15 | 26042757  | 26043022 | KD2-H4K8ac_peak_9412 | 6.66692  |                                                                               |
| 15 | 26095508  | 26095700 | KD2-H4K8ac_peak_9413 | 7.12754  |                                                                               |
| 15 | 26178889  | 26179105 | KD2-H4K8ac_peak_9414 | 6.07178  |                                                                               |
| 15 | 26915235  | 26915446 | KD2-H4K8ac_peak_9415 | 7.12754  |                                                                               |
| 15 | 27018435  | 27018852 | KD2-H4K8ac_peak_9416 | 5.30799  |                                                                               |
| 15 | 27136804  | 27137023 | KD2-H4K8ac_peak_9417 | 7.47462  |                                                                               |
| 15 | 27332019  | 27332250 | KD2-H4K8ac_peak_9418 | 5.9696   |                                                                               |
| 15 | 27818927  | 27819194 | KD2-H4K8ac_peak_9419 | 5.88845  |                                                                               |
| 15 | 28235251  | 28235657 | KD2-H4K8ac_peak_9420 | 6.05809  |                                                                               |
| 15 | 28266578  | 28266888 | KD2-H4K8ac_peak_9421 | 5.57044  |                                                                               |
| 15 | 28297153  | 28297347 | KD2-H4K8ac_peak_9422 | 7.47462  |                                                                               |
| 15 | 28351583  | 28351836 | KD2-H4K8ac_peak_9423 | 6.65673  |                                                                               |
| 15 | 28699802  | 28700256 | KD2-H4K8ac_peak_9424 | 15.28459 |                                                                               |
| 15 | 28834079  | 28834437 | KD2-H4K8ac_peak_9425 | 26.96144 | HERC2P9_ENSG00000206149                                                       |
| 15 | 28982725  | 28983205 | KD2-H4K8ac_peak_9426 | 5.54647  | GOLGA8M_ENSG00000188626;RP11-578F21.6_ENSG00000261480;WHAMMP2_ENSG00000248334 |
| 15 | 29077487  | 29077828 | KD2-H4K8ac_peak_9427 | 10.46264 |                                                                               |
| 15 | 29130600  | 29131527 | KD2-H4K8ac_peak_9428 | 14.66631 | APBA2_ENSG00000034053                                                         |

|    |          |          |                      |          |                              |
|----|----------|----------|----------------------|----------|------------------------------|
| 15 | 29131861 | 29132213 | KD2-H4K8ac_peak_9429 | 10.19949 |                              |
| 15 | 29157532 | 29157893 | KD2-H4K8ac_peak_9430 | 5.88845  |                              |
| 15 | 29246886 | 29247263 | KD2-H4K8ac_peak_9431 | 5.82869  |                              |
| 15 | 29414105 | 29414308 | KD2-H4K8ac_peak_9432 | 4.211    |                              |
| 15 | 29519665 | 29519889 | KD2-H4K8ac_peak_9433 | 7.07117  |                              |
| 15 | 29561669 | 29561964 | KD2-H4K8ac_peak_9434 | 12.08081 | NDNL2_ENSG00000185115        |
| 15 | 29638373 | 29638684 | KD2-H4K8ac_peak_9435 | 4.42765  |                              |
| 15 | 29743753 | 29744016 | KD2-H4K8ac_peak_9436 | 6.9809   |                              |
| 15 | 29980502 | 29980754 | KD2-H4K8ac_peak_9437 | 5.40356  |                              |
| 15 | 30038280 | 30038475 | KD2-H4K8ac_peak_9438 | 8.1233   |                              |
| 15 | 30260554 | 30261447 | KD2-H4K8ac_peak_9439 | 15.5861  | TJP1_ENSG00000104067         |
| 15 | 30488302 | 30488667 | KD2-H4K8ac_peak_9440 | 12.81138 | AC026150.5_ENSG00000225930   |
| 15 | 30659356 | 30659743 | KD2-H4K8ac_peak_9441 | 9.1707   |                              |
| 15 | 31196157 | 31196354 | KD2-H4K8ac_peak_9442 | 12.08081 | FAN1_ENSG00000198690         |
| 15 | 31283995 | 31284506 | KD2-H4K8ac_peak_9443 | 11.89502 | MTMR10_ENSG00000166912       |
| 15 | 31505588 | 31505833 | KD2-H4K8ac_peak_9444 | 8.17902  |                              |
| 15 | 31507862 | 31508393 | KD2-H4K8ac_peak_9445 | 29.10149 | RP11-16E12.1_ENSG00000259448 |
| 15 | 31529291 | 31529919 | KD2-H4K8ac_peak_9446 | 10.8368  |                              |
| 15 | 31556005 | 31556295 | KD2-H4K8ac_peak_9447 | 5.02474  |                              |
| 15 | 31572282 | 31572623 | KD2-H4K8ac_peak_9448 | 5.53033  |                              |
| 15 | 31592572 | 31592930 | KD2-H4K8ac_peak_9449 | 8.52559  |                              |
| 15 | 31593318 | 31593614 | KD2-H4K8ac_peak_9450 | 14.275   |                              |
| 15 | 31594166 | 31594388 | KD2-H4K8ac_peak_9451 | 7.42204  |                              |
| 15 | 31598197 | 31598397 | KD2-H4K8ac_peak_9452 | 5.75757  |                              |
| 15 | 31618067 | 31618603 | KD2-H4K8ac_peak_9453 | 11.92978 | KLF13_ENSG00000169926        |
| 15 | 31619077 | 31620827 | KD2-H4K8ac_peak_9454 | 11.89502 | KLF13_ENSG00000169926        |
| 15 | 31637478 | 31637680 | KD2-H4K8ac_peak_9455 | 5.61377  |                              |
| 15 | 31645128 | 31645348 | KD2-H4K8ac_peak_9456 | 6.65673  |                              |
| 15 | 31664162 | 31664511 | KD2-H4K8ac_peak_9457 | 6.75424  |                              |
| 15 | 31683689 | 31684406 | KD2-H4K8ac_peak_9458 | 8.26565  |                              |
| 15 | 31690465 | 31691534 | KD2-H4K8ac_peak_9459 | 14.66631 |                              |
| 15 | 31691785 | 31692038 | KD2-H4K8ac_peak_9460 | 5.92591  |                              |
| 15 | 31727400 | 31727801 | KD2-H4K8ac_peak_9461 | 7.27716  |                              |
| 15 | 31732820 | 31734079 | KD2-H4K8ac_peak_9462 | 19.3524  |                              |
| 15 | 31792253 | 31793024 | KD2-H4K8ac_peak_9463 | 9.1707   |                              |
| 15 | 32163131 | 32163622 | KD2-H4K8ac_peak_9464 | 10.33529 | OTUD7A_ENSG00000169918       |
| 15 | 32180002 | 32180194 | KD2-H4K8ac_peak_9465 | 4.211    |                              |
| 15 | 32266781 | 32266975 | KD2-H4K8ac_peak_9466 | 6.40683  |                              |
| 15 | 32267335 | 32267765 | KD2-H4K8ac_peak_9467 | 11.89502 |                              |
| 15 | 32322001 | 32322523 | KD2-H4K8ac_peak_9468 | 8.55271  | CHRNA7_ENSG00000175344       |
| 15 | 32322750 | 32322988 | KD2-H4K8ac_peak_9469 | 8.16906  | CHRNA7_ENSG00000175344       |
| 15 | 32383885 | 32384104 | KD2-H4K8ac_peak_9470 | 5.14125  |                              |
| 15 | 32385493 | 32385764 | KD2-H4K8ac_peak_9471 | 7.27716  |                              |
| 15 | 32392264 | 32392456 | KD2-H4K8ac_peak_9472 | 5.66317  |                              |
| 15 | 33312081 | 33312287 | KD2-H4K8ac_peak_9473 | 4.37708  |                              |
| 15 | 33359725 | 33360761 | KD2-H4K8ac_peak_9474 | 10.8368  |                              |

|    |          |          |                      |          |                                               |
|----|----------|----------|----------------------|----------|-----------------------------------------------|
| 15 | 33418265 | 33418611 | KD2-H4K8ac_peak_9475 | 4.77079  |                                               |
| 15 | 33440629 | 33440868 | KD2-H4K8ac_peak_9476 | 7.05877  |                                               |
| 15 | 33451154 | 33451384 | KD2-H4K8ac_peak_9477 | 7.45501  |                                               |
| 15 | 33451997 | 33452580 | KD2-H4K8ac_peak_9478 | 8.17902  |                                               |
| 15 | 33453501 | 33454103 | KD2-H4K8ac_peak_9479 | 13.34404 |                                               |
| 15 | 33931100 | 33931309 | KD2-H4K8ac_peak_9480 | 5.73839  |                                               |
| 15 | 34330423 | 34331483 | KD2-H4K8ac_peak_9481 | 22.21705 | AVEN_ENSG00000169857                          |
| 15 | 34501826 | 34502180 | KD2-H4K8ac_peak_9482 | 9.20193  | KATNBL1_ENSG00000134152                       |
| 15 | 34515753 | 34516929 | KD2-H4K8ac_peak_9483 | 10.7855  | EMC4_ENSG00000128463                          |
| 15 | 34517232 | 34517546 | KD2-H4K8ac_peak_9484 | 19.9503  | EMC4_ENSG00000128463                          |
| 15 | 34634900 | 34635176 | KD2-H4K8ac_peak_9485 | 7.12754  | NOP10_ENSG00000182117;NUTM1_ENSG00000184507   |
| 15 | 34635654 | 34635900 | KD2-H4K8ac_peak_9486 | 13.92307 | NOP10_ENSG00000182117;NUTM1_ENSG00000184507   |
| 15 | 34658986 | 34659203 | KD2-H4K8ac_peak_9487 | 9.34989  | LPCAT4_ENSG00000176454                        |
| 15 | 34659544 | 34660182 | KD2-H4K8ac_peak_9488 | 13.81781 | LPCAT4_ENSG00000176454                        |
| 15 | 34729107 | 34729487 | KD2-H4K8ac_peak_9489 | 8.17902  |                                               |
| 15 | 34787129 | 34787394 | KD2-H4K8ac_peak_9490 | 4.56666  | RP11-1H8.3_ENSG00000261559                    |
| 15 | 34806170 | 34806625 | KD2-H4K8ac_peak_9491 | 4.211    |                                               |
| 15 | 34806866 | 34807308 | KD2-H4K8ac_peak_9492 | 6.25869  |                                               |
| 15 | 34874796 | 34875009 | KD2-H4K8ac_peak_9493 | 10.77651 |                                               |
| 15 | 34875246 | 34876612 | KD2-H4K8ac_peak_9494 | 5.26288  |                                               |
| 15 | 35280133 | 35280447 | KD2-H4K8ac_peak_9495 | 8.4716   | ZNF770_ENSG00000198146                        |
| 15 | 35280650 | 35280850 | KD2-H4K8ac_peak_9496 | 7.36799  | ZNF770_ENSG00000198146                        |
| 15 | 35837948 | 35838917 | KD2-H4K8ac_peak_9497 | 13.3695  | DPH6_ENSG00000134146;DPH6-AS1_ENSG00000248079 |
| 15 | 36163512 | 36163709 | KD2-H4K8ac_peak_9498 | 8.1233   |                                               |
| 15 | 36871875 | 36872429 | KD2-H4K8ac_peak_9499 | 9.36516  | C15orf41_ENSG00000186073                      |
| 15 | 37388002 | 37389020 | KD2-H4K8ac_peak_9500 | 9.51625  |                                               |
| 15 | 37389334 | 37390415 | KD2-H4K8ac_peak_9501 | 6.99815  |                                               |
| 15 | 37390928 | 37391284 | KD2-H4K8ac_peak_9502 | 4.86324  | RP11-128A17.1_ENSG00000259460                 |
| 15 | 37393090 | 37394170 | KD2-H4K8ac_peak_9503 | 11.92978 | MEIS2_ENSG00000134138                         |
| 15 | 37394504 | 37394801 | KD2-H4K8ac_peak_9504 | 5.9696   |                                               |
| 15 | 37396639 | 37396966 | KD2-H4K8ac_peak_9505 | 6.00226  |                                               |
| 15 | 37398844 | 37399108 | KD2-H4K8ac_peak_9506 | 6.8836   |                                               |
| 15 | 37402598 | 37403068 | KD2-H4K8ac_peak_9507 | 6.66359  |                                               |
| 15 | 37511375 | 37511608 | KD2-H4K8ac_peak_9508 | 11.89502 |                                               |
| 15 | 37514736 | 37515091 | KD2-H4K8ac_peak_9509 | 8.04763  |                                               |
| 15 | 38086324 | 38086553 | KD2-H4K8ac_peak_9510 | 7.12754  |                                               |
| 15 | 38113199 | 38114013 | KD2-H4K8ac_peak_9511 | 9.02371  |                                               |
| 15 | 38116098 | 38116327 | KD2-H4K8ac_peak_9512 | 7.27716  |                                               |
| 15 | 38172076 | 38172488 | KD2-H4K8ac_peak_9513 | 5.10276  |                                               |
| 15 | 38364921 | 38365449 | KD2-H4K8ac_peak_9514 | 11.00004 | RP11-1008C21.2_ENSG00000236914                |
| 15 | 38544303 | 38545258 | KD2-H4K8ac_peak_9515 | 11.92978 | SPRED1_ENSG00000166068                        |
| 15 | 38746450 | 38746823 | KD2-H4K8ac_peak_9516 | 12.99417 | FAM98B_ENSG00000171262                        |
| 15 | 38856750 | 38857414 | KD2-H4K8ac_peak_9517 | 8.02571  | RASGRP1_ENSG00000172575                       |
| 15 | 39169989 | 39170439 | KD2-H4K8ac_peak_9518 | 5.57044  |                                               |
| 15 | 39172438 | 39172853 | KD2-H4K8ac_peak_9519 | 5.14125  |                                               |
| 15 | 39188268 | 39188551 | KD2-H4K8ac_peak_9520 | 11.92209 |                                               |

|    |          |          |                      |          |                                                      |
|----|----------|----------|----------------------|----------|------------------------------------------------------|
| 15 | 39522875 | 39523208 | KD2-H4K8ac_peak_9521 | 9.11031  |                                                      |
| 15 | 39655549 | 39655756 | KD2-H4K8ac_peak_9522 | 5.25071  |                                                      |
| 15 | 39872606 | 39873083 | KD2-H4K8ac_peak_9523 | 11.03331 | THBS1_ENSG00000137801                                |
| 15 | 40074848 | 40075302 | KD2-H4K8ac_peak_9524 | 6.16888  | FSIP1_ENSG00000150667;RP11-37C7.3_ENSG00000261136    |
| 15 | 40211864 | 40213547 | KD2-H4K8ac_peak_9525 | 12.82393 | GPR176_ENSG00000166073;RP11-325N19.3_ENSG00000246863 |
| 15 | 40225678 | 40225980 | KD2-H4K8ac_peak_9526 | 8.37043  | EIF2AK4_ENSG00000128829                              |
| 15 | 40226402 | 40226686 | KD2-H4K8ac_peak_9527 | 4.70206  | EIF2AK4_ENSG00000128829                              |
| 15 | 40331076 | 40331282 | KD2-H4K8ac_peak_9528 | 6.98244  | SRP14_ENSG00000140319;SRP14-AS1_ENSG00000248508      |
| 15 | 40360444 | 40360672 | KD2-H4K8ac_peak_9529 | 5.10505  |                                                      |
| 15 | 40361559 | 40362170 | KD2-H4K8ac_peak_9530 | 10.44656 |                                                      |
| 15 | 40373982 | 40374479 | KD2-H4K8ac_peak_9531 | 6.83936  |                                                      |
| 15 | 40384854 | 40385513 | KD2-H4K8ac_peak_9532 | 11.19034 |                                                      |
| 15 | 40394672 | 40395546 | KD2-H4K8ac_peak_9533 | 8.29     |                                                      |
| 15 | 40395798 | 40396004 | KD2-H4K8ac_peak_9534 | 4.06758  |                                                      |
| 15 | 40401425 | 40401622 | KD2-H4K8ac_peak_9535 | 6.55628  | BMF_ENSG00000104081                                  |
| 15 | 40452573 | 40453022 | KD2-H4K8ac_peak_9536 | 10.08707 | BUB1B_ENSG00000156970                                |
| 15 | 40453386 | 40453684 | KD2-H4K8ac_peak_9537 | 4.211    | BUB1B_ENSG00000156970                                |
| 15 | 40530814 | 40531769 | KD2-H4K8ac_peak_9538 | 9.11031  |                                                      |
| 15 | 40574165 | 40574385 | KD2-H4K8ac_peak_9539 | 5.54647  | ANKRD63_ENSG00000230778                              |
| 15 | 40574689 | 40575192 | KD2-H4K8ac_peak_9540 | 6.65673  | ANKRD63_ENSG00000230778                              |
| 15 | 40583218 | 40584042 | KD2-H4K8ac_peak_9541 | 15.81711 |                                                      |
| 15 | 40594028 | 40594472 | KD2-H4K8ac_peak_9542 | 7.07117  |                                                      |
| 15 | 40594733 | 40595027 | KD2-H4K8ac_peak_9543 | 8.02571  |                                                      |
| 15 | 40616333 | 40616588 | KD2-H4K8ac_peak_9544 | 4.67342  | LINC00984_ENSG00000259330                            |
| 15 | 40631926 | 40633481 | KD2-H4K8ac_peak_9545 | 12.13241 | C15orf52_ENSG00000188549                             |
| 15 | 40649938 | 40650296 | KD2-H4K8ac_peak_9546 | 10.74057 | DISP2_ENSG00000140323                                |
| 15 | 40660539 | 40660907 | KD2-H4K8ac_peak_9547 | 6.1846   | RP11-64K12.4_ENSG00000259368                         |
| 15 | 40674734 | 40675006 | KD2-H4K8ac_peak_9548 | 10.87093 | KNSTRN_ENSG00000128944                               |
| 15 | 40675205 | 40675652 | KD2-H4K8ac_peak_9549 | 9.51625  | KNSTRN_ENSG00000128944                               |
| 15 | 40727933 | 40729442 | KD2-H4K8ac_peak_9550 | 17.93813 |                                                      |
| 15 | 40733491 | 40733707 | KD2-H4K8ac_peak_9551 | 4.86324  |                                                      |
| 15 | 40762597 | 40763012 | KD2-H4K8ac_peak_9552 | 8.10216  | CHST14_ENSG00000169105                               |
| 15 | 40763387 | 40763939 | KD2-H4K8ac_peak_9553 | 11.80283 | CHST14_ENSG00000169105                               |
| 15 | 40856850 | 40857086 | KD2-H4K8ac_peak_9554 | 6.65673  | C15orf57_ENSG00000128891                             |
| 15 | 40886211 | 40886909 | KD2-H4K8ac_peak_9555 | 14.81583 | CASC5_ENSG00000137812                                |
| 15 | 40987009 | 40987231 | KD2-H4K8ac_peak_9556 | 15.69572 | RAD51-AS1_ENSG00000245849;RAD51_ENSG00000051180      |
| 15 | 40987950 | 40988165 | KD2-H4K8ac_peak_9557 | 3.87414  | RAD51-AS1_ENSG00000245849;RAD51_ENSG00000051180      |
| 15 | 41047171 | 41047369 | KD2-H4K8ac_peak_9558 | 8.17902  | RMDN3_ENSG00000137824                                |
| 15 | 41047642 | 41047942 | KD2-H4K8ac_peak_9559 | 5.57044  | RMDN3_ENSG00000137824                                |
| 15 | 41049793 | 41050039 | KD2-H4K8ac_peak_9560 | 8.2413   |                                                      |
| 15 | 41061012 | 41061967 | KD2-H4K8ac_peak_9561 | 12.17278 | C15orf62_ENSG00000188277                             |
| 15 | 41098356 | 41098621 | KD2-H4K8ac_peak_9562 | 4.47369  | ZFYVE19_ENSG00000166140                              |
| 15 | 41099198 | 41099609 | KD2-H4K8ac_peak_9563 | 15.82743 | DNAJC17_ENSG00000104129;ZFYVE19_ENSG00000166140      |
| 15 | 41135976 | 41136397 | KD2-H4K8ac_peak_9564 | 6.2781   | RP11-532F12.5_ENSG00000261183;SPINT1_ENSG00000166145 |
| 15 | 41149648 | 41150260 | KD2-H4K8ac_peak_9565 | 7.47462  |                                                      |
| 15 | 41166059 | 41166516 | KD2-H4K8ac_peak_9566 | 8.16906  | RHOV_ENSG00000104140;AC025166.1_ENSG00000264256      |

|    |          |          |                      |          |                                                                                                          |
|----|----------|----------|----------------------|----------|----------------------------------------------------------------------------------------------------------|
| 15 | 41185885 | 41186267 | KD2-H4K8ac_peak_9567 | 7.146    | VPS18_ENSG00000104142                                                                                    |
| 15 | 41198906 | 41199967 | KD2-H4K8ac_peak_9568 | 11.80283 | RP11-540O11.1_ENSG00000251161                                                                            |
| 15 | 41203581 | 41203856 | KD2-H4K8ac_peak_9569 | 5.29555  |                                                                                                          |
| 15 | 41233428 | 41234645 | KD2-H4K8ac_peak_9570 | 16.8435  |                                                                                                          |
| 15 | 41244551 | 41245413 | KD2-H4K8ac_peak_9571 | 17.09549 | CHAC1_ENSG00000128965                                                                                    |
| 15 | 41408269 | 41408673 | KD2-H4K8ac_peak_9572 | 10.45683 | INO80_ENSG00000128908                                                                                    |
| 15 | 41409077 | 41409389 | KD2-H4K8ac_peak_9573 | 5.20998  | INO80_ENSG00000128908                                                                                    |
| 15 | 41522502 | 41523164 | KD2-H4K8ac_peak_9574 | 5.405    | EXD1_ENSG00000178997;CHP1_ENSG00000187446                                                                |
| 15 | 41523478 | 41523701 | KD2-H4K8ac_peak_9575 | 8.16906  | EXD1_ENSG00000178997;CHP1_ENSG00000187446                                                                |
| 15 | 41575530 | 41575885 | KD2-H4K8ac_peak_9576 | 10.43145 | OIP5-AS1_ENSG00000247556                                                                                 |
| 15 | 41576259 | 41576519 | KD2-H4K8ac_peak_9577 | 7.07117  | OIP5-AS1_ENSG00000247556                                                                                 |
| 15 | 41624488 | 41624751 | KD2-H4K8ac_peak_9578 | 14.56955 | OIP5_ENSG00000104147;NUSAP1_ENSG00000137804                                                              |
| 15 | 41625116 | 41625360 | KD2-H4K8ac_peak_9579 | 5.88845  | OIP5_ENSG00000104147;NUSAP1_ENSG00000137804                                                              |
| 15 | 41694977 | 41695270 | KD2-H4K8ac_peak_9580 | 9.51625  | NDUFAF1_ENSG00000137806                                                                                  |
| 15 | 41709491 | 41709786 | KD2-H4K8ac_peak_9581 | 8.10216  |                                                                                                          |
| 15 | 41785492 | 41785877 | KD2-H4K8ac_peak_9582 | 8.85813  | ITPKA_ENSG00000137825                                                                                    |
| 15 | 41836141 | 41836408 | KD2-H4K8ac_peak_9583 | 9.20193  | RPAP1_ENSG00000103932                                                                                    |
| 15 | 41836772 | 41837066 | KD2-H4K8ac_peak_9584 | 6.66692  | RPAP1_ENSG00000103932                                                                                    |
| 15 | 41851400 | 41851618 | KD2-H4K8ac_peak_9585 | 9.16531  |                                                                                                          |
| 15 | 41856637 | 41857137 | KD2-H4K8ac_peak_9586 | 7.48822  |                                                                                                          |
| 15 | 41913045 | 41914082 | KD2-H4K8ac_peak_9587 | 5.01002  | MGA_ENSG00000174197                                                                                      |
| 15 | 41952135 | 41953339 | KD2-H4K8ac_peak_9588 | 15.06766 |                                                                                                          |
| 15 | 42066792 | 42067082 | KD2-H4K8ac_peak_9589 | 11.50346 | MAPKBP1_ENSG00000137802                                                                                  |
| 15 | 42120317 | 42120578 | KD2-H4K8ac_peak_9590 | 11.05467 | RP11-23P13.4_ENSG00000250379;PLA2G4B_ENSG00000243708;JMJD7_ENSG00000243789;JMJD7-PLA2G4B_ENSG00000168970 |
| 15 | 42186357 | 42187560 | KD2-H4K8ac_peak_9591 | 9.63487  | SPTBN5_ENSG00000137877                                                                                   |
| 15 | 42376874 | 42377197 | KD2-H4K8ac_peak_9592 | 6.0073   |                                                                                                          |
| 15 | 42500012 | 42500362 | KD2-H4K8ac_peak_9593 | 7.95563  | VPS39_ENSG00000166887;RP11-546B15.1_ENSG00000261002                                                      |
| 15 | 42565872 | 42567096 | KD2-H4K8ac_peak_9594 | 7.36799  | TMEM87A_ENSG00000103978;GANC_ENSG00000214013                                                             |
| 15 | 42782940 | 42783271 | KD2-H4K8ac_peak_9595 | 12.70959 | ZNF106_ENSG00000103994;SNAP23_ENSG00000092531                                                            |
| 15 | 42787996 | 42788231 | KD2-H4K8ac_peak_9596 | 8.02571  |                                                                                                          |
| 15 | 42841104 | 42841395 | KD2-H4K8ac_peak_9597 | 6.28103  | LRRCS7_ENSG00000180979;HAUS2_ENSG00000137814                                                             |
| 15 | 42866841 | 42867203 | KD2-H4K8ac_peak_9598 | 8.59579  | STARD9_ENSG00000159433                                                                                   |
| 15 | 43028884 | 43029203 | KD2-H4K8ac_peak_9599 | 6.65673  | CDAN1_ENSG00000140326                                                                                    |
| 15 | 43029450 | 43029648 | KD2-H4K8ac_peak_9600 | 11.05467 | CDAN1_ENSG00000140326                                                                                    |
| 15 | 43213467 | 43213776 | KD2-H4K8ac_peak_9601 | 7.27716  | TTBK2_ENSG00000128881                                                                                    |
| 15 | 43397819 | 43398180 | KD2-H4K8ac_peak_9602 | 8.59579  | UBR1_ENSG00000159459                                                                                     |
| 15 | 43425014 | 43426380 | KD2-H4K8ac_peak_9603 | 10.19949 |                                                                                                          |
| 15 | 43476940 | 43477225 | KD2-H4K8ac_peak_9604 | 4.19473  | RP11-473C18.3_ENSG00000261687;CCNDBP1_ENSG00000166946                                                    |
| 15 | 43621904 | 43622386 | KD2-H4K8ac_peak_9605 | 11.04256 | LCMT2_ENSG00000168806;ADAL_ENSG00000168803                                                               |
| 15 | 43662564 | 43663107 | KD2-H4K8ac_peak_9606 | 13.34404 | ZSCAN29_ENSG00000140265                                                                                  |
| 15 | 43663371 | 43663581 | KD2-H4K8ac_peak_9607 | 5.85291  | ZSCAN29_ENSG00000140265                                                                                  |
| 15 | 43800336 | 43800672 | KD2-H4K8ac_peak_9608 | 4.42765  |                                                                                                          |
| 15 | 43801491 | 43801945 | KD2-H4K8ac_peak_9609 | 10.05606 | TP53BP1_ENSG00000067369                                                                                  |
| 15 | 43802568 | 43802810 | KD2-H4K8ac_peak_9610 | 8.23274  | TP53BP1_ENSG00000067369;MAP1A_ENSG00000166963                                                            |
| 15 | 44037952 | 44038299 | KD2-H4K8ac_peak_9611 | 6.60096  | PDIA3_ENSG00000167004;CATSPER2P1_ENSG00000205771                                                         |
| 15 | 44083757 | 44084189 | KD2-H4K8ac_peak_9612 | 8.26945  |                                                                                                          |

|    |          |          |                      |          |                                                             |
|----|----------|----------|----------------------|----------|-------------------------------------------------------------|
| 15 | 44084764 | 44084991 | KD2-H4K8ac_peak_9613 | 8.4716   | MIR1282_ENSG00000221792                                     |
| 15 | 44092085 | 44092525 | KD2-H4K8ac_peak_9614 | 13.07235 | RP11-296A16.1_ENSG00000262560;SERINC4_ENSG00000184716       |
| 15 | 44117455 | 44117752 | KD2-H4K8ac_peak_9615 | 9.02573  | MFAP1_ENSG00000140259                                       |
| 15 | 44118773 | 44119375 | KD2-H4K8ac_peak_9616 | 9.16531  | WDR76_ENSG00000092470                                       |
| 15 | 44195896 | 44196390 | KD2-H4K8ac_peak_9617 | 8.17902  |                                                             |
| 15 | 44486725 | 44487114 | KD2-H4K8ac_peak_9618 | 10.86378 | FRMD5_ENSG00000171877                                       |
| 15 | 44487703 | 44488161 | KD2-H4K8ac_peak_9619 | 8.10216  | FRMD5_ENSG00000171877                                       |
| 15 | 44580951 | 44581261 | KD2-H4K8ac_peak_9620 | 11.24702 | CASC4_ENSG00000166734                                       |
| 15 | 44829370 | 44829933 | KD2-H4K8ac_peak_9621 | 19.47291 | EIF3J-AS1_ENSG00000179523;EIF3J_ENSG00000104131             |
| 15 | 44955171 | 44955727 | KD2-H4K8ac_peak_9622 | 14.43794 | SPG11_ENSG00000104133                                       |
| 15 | 44956065 | 44956640 | KD2-H4K8ac_peak_9623 | 9.34195  | SPG11_ENSG00000104133                                       |
| 15 | 45003295 | 45003502 | KD2-H4K8ac_peak_9624 | 8.02571  | PATL2_ENSG00000229474;B2M_ENSG00000166710                   |
| 15 | 45004095 | 45004300 | KD2-H4K8ac_peak_9625 | 8.17902  | PATL2_ENSG00000229474;B2M_ENSG00000166710                   |
| 15 | 45020546 | 45021014 | KD2-H4K8ac_peak_9626 | 11.89502 | TRIM69_ENSG00000185880                                      |
| 15 | 45021280 | 45021670 | KD2-H4K8ac_peak_9627 | 17.43705 | TRIM69_ENSG00000185880                                      |
| 15 | 45076386 | 45076919 | KD2-H4K8ac_peak_9628 | 13.2739  |                                                             |
| 15 | 45114532 | 45114981 | KD2-H4K8ac_peak_9629 | 5.88845  |                                                             |
| 15 | 45271650 | 45271947 | KD2-H4K8ac_peak_9630 | 4.37708  |                                                             |
| 15 | 45275408 | 45275796 | KD2-H4K8ac_peak_9631 | 7.12754  |                                                             |
| 15 | 45277401 | 45277607 | KD2-H4K8ac_peak_9632 | 5.57044  |                                                             |
| 15 | 45314940 | 45315181 | KD2-H4K8ac_peak_9633 | 13.35993 | SORD_ENSG00000140263                                        |
| 15 | 45315429 | 45315718 | KD2-H4K8ac_peak_9634 | 7.92775  | SORD_ENSG00000140263                                        |
| 15 | 45369932 | 45370409 | KD2-H4K8ac_peak_9635 | 7.70289  |                                                             |
| 15 | 45410013 | 45410308 | KD2-H4K8ac_peak_9636 | 12.84642 |                                                             |
| 15 | 45458748 | 45459141 | KD2-H4K8ac_peak_9637 | 17.8737  | CTD-2651B20.1_ENSG00000259539                               |
| 15 | 45459408 | 45460231 | KD2-H4K8ac_peak_9638 | 8.80432  | CTD-2651B20.1_ENSG00000259539                               |
| 15 | 45460632 | 45461726 | KD2-H4K8ac_peak_9639 | 10.74343 | CTD-2651B20.1_ENSG00000259539;RP11-519G16.2_ENSG00000259519 |
| 15 | 45479295 | 45479516 | KD2-H4K8ac_peak_9640 | 5.61067  |                                                             |
| 15 | 45492797 | 45493284 | KD2-H4K8ac_peak_9641 | 13.57115 | SHF_ENSG00000138606;CTD-2651B20.6_ENSG00000260035           |
| 15 | 45669961 | 45671015 | KD2-H4K8ac_peak_9642 | 15.13261 |                                                             |
| 15 | 45694106 | 45694385 | KD2-H4K8ac_peak_9643 | 6.85193  | GATM_ENSG00000171766;SPATA5L1_ENSG00000171763               |
| 15 | 45694608 | 45695412 | KD2-H4K8ac_peak_9644 | 11.28831 | GATM_ENSG00000171766;SPATA5L1_ENSG00000171763               |
| 15 | 45814680 | 45815575 | KD2-H4K8ac_peak_9645 | 15.59774 | SLC30A4_ENSG00000104154                                     |
| 15 | 45878908 | 45879961 | KD2-H4K8ac_peak_9646 | 4.84794  | BLOC1S6_ENSG00000104164;RP11-96O20.4_ENSG00000260170        |
| 15 | 45926869 | 45927482 | KD2-H4K8ac_peak_9647 | 8.83582  |                                                             |
| 15 | 45997508 | 45997721 | KD2-H4K8ac_peak_9648 | 5.22731  | RP11-718O11.1_ENSG00000259200                               |
| 15 | 46373085 | 46373891 | KD2-H4K8ac_peak_9649 | 12.42547 |                                                             |
| 15 | 46569995 | 46570458 | KD2-H4K8ac_peak_9650 | 8.1233   |                                                             |
| 15 | 47476563 | 47477301 | KD2-H4K8ac_peak_9651 | 17.17257 | SEMA6D_ENSG00000137872                                      |
| 15 | 47477754 | 47477952 | KD2-H4K8ac_peak_9652 | 7.13615  |                                                             |
| 15 | 47697283 | 47697533 | KD2-H4K8ac_peak_9653 | 7.75499  |                                                             |
| 15 | 47703889 | 47704188 | KD2-H4K8ac_peak_9654 | 7.27716  |                                                             |
| 15 | 48392818 | 48393092 | KD2-H4K8ac_peak_9655 | 7.01964  |                                                             |
| 15 | 48470033 | 48470507 | KD2-H4K8ac_peak_9656 | 14.80472 | MYEF2_ENSG00000104177                                       |
| 15 | 48470710 | 48470920 | KD2-H4K8ac_peak_9657 | 9.72244  | MYEF2_ENSG00000104177                                       |
| 15 | 48623391 | 48624037 | KD2-H4K8ac_peak_9658 | 13.73635 | RP11-154J22.1_ENSG00000259488;DUT_ENSG00000128951           |

|    |          |          |                      |          |                                                                           |
|----|----------|----------|----------------------|----------|---------------------------------------------------------------------------|
| 15 | 48829522 | 48829818 | KD2-H4K8ac_peak_9659 | 5.14125  |                                                                           |
| 15 | 48937595 | 48937824 | KD2-H4K8ac_peak_9660 | 8.2413   | FBN1_ENSG00000166147;RP11-227D13.1_ENSG00000259705                        |
| 15 | 48938311 | 48938654 | KD2-H4K8ac_peak_9661 | 16.64426 | FBN1_ENSG00000166147;RP11-227D13.1_ENSG00000259705                        |
| 15 | 49102841 | 49103150 | KD2-H4K8ac_peak_9662 | 9.63487  | CEP152_ENSG00000103995;RP11-485O10.3_ENSG00000259700                      |
| 15 | 49170383 | 49170768 | KD2-H4K8ac_peak_9663 | 11.1952  | EID1_ENSG00000255302;AC012379.1_ENSG00000235883                           |
| 15 | 49255419 | 49255916 | KD2-H4K8ac_peak_9664 | 6.04107  | SHC4_ENSG00000185634                                                      |
| 15 | 49268258 | 49268908 | KD2-H4K8ac_peak_9665 | 14.63458 |                                                                           |
| 15 | 49338192 | 49338520 | KD2-H4K8ac_peak_9666 | 5.59859  | SECISBP2L_ENSG00000138593                                                 |
| 15 | 49447543 | 49447745 | KD2-H4K8ac_peak_9667 | 8.16906  | NDUFAF4P1_ENSG00000259467;COPS2_ENSG00000166200;GALK2_ENSG00000156958     |
| 15 | 49462210 | 49462717 | KD2-H4K8ac_peak_9668 | 8.17902  | MIR4716_ENSG00000264210                                                   |
| 15 | 49913301 | 49913514 | KD2-H4K8ac_peak_9669 | 11.30637 | FAM227B_ENSG00000166262;DTWD1_ENSG00000104047                             |
| 15 | 50474251 | 50474531 | KD2-H4K8ac_peak_9670 | 5.08628  | ATP8B4_ENSG00000104043;SLC27A2_ENSG00000140284                            |
| 15 | 50646431 | 50647989 | KD2-H4K8ac_peak_9671 | 22.21705 | GABPB1_ENSG00000104064;GABPB1-AS1_ENSG00000244879                         |
| 15 | 50715735 | 50716073 | KD2-H4K8ac_peak_9672 | 17.25154 | USP8_ENSG00000138592                                                      |
| 15 | 50716630 | 50716897 | KD2-H4K8ac_peak_9673 | 11.43353 | USP8_ENSG00000138592                                                      |
| 15 | 50978575 | 50978920 | KD2-H4K8ac_peak_9674 | 6.40297  | TRPM7_ENSG00000092439                                                     |
| 15 | 50979127 | 50979483 | KD2-H4K8ac_peak_9675 | 11.22681 | TRPM7_ENSG00000092439                                                     |
| 15 | 51057487 | 51058402 | KD2-H4K8ac_peak_9676 | 16.73922 | SPPL2A_ENSG00000138600                                                    |
| 15 | 51200078 | 51201341 | KD2-H4K8ac_peak_9677 | 14.8083  | AP4E1_ENSG00000081014                                                     |
| 15 | 51914536 | 51915533 | KD2-H4K8ac_peak_9678 | 10.65724 | DMXL2_ENSG00000104093                                                     |
| 15 | 51973313 | 51973692 | KD2-H4K8ac_peak_9679 | 5.88845  | SCG3_ENSG00000104112                                                      |
| 15 | 52029592 | 52030313 | KD2-H4K8ac_peak_9680 | 9.63487  |                                                                           |
| 15 | 52043359 | 52043633 | KD2-H4K8ac_peak_9681 | 6.99194  | LYSMD2_ENSG00000140280;TMOD2_ENSG00000128872                              |
| 15 | 52121253 | 52122465 | KD2-H4K8ac_peak_9682 | 15.81711 | TMOD3_ENSG00000138594                                                     |
| 15 | 52263617 | 52263932 | KD2-H4K8ac_peak_9683 | 6.0605   | LEO1_ENSG00000166477                                                      |
| 15 | 52264329 | 52264577 | KD2-H4K8ac_peak_9684 | 6.66692  | LEO1_ENSG00000166477                                                      |
| 15 | 52310865 | 52311646 | KD2-H4K8ac_peak_9685 | 16.54484 | CTD-2650P22.1_ENSG00000259438                                             |
| 15 | 52319121 | 52319380 | KD2-H4K8ac_peak_9686 | 4.40093  |                                                                           |
| 15 | 52471643 | 52471849 | KD2-H4K8ac_peak_9687 | 8.52559  | RP11-430B1.2_ENSG00000259577                                              |
| 15 | 52472244 | 52472607 | KD2-H4K8ac_peak_9688 | 8.4716   | RP11-430B1.2_ENSG00000259577                                              |
| 15 | 52587416 | 52588008 | KD2-H4K8ac_peak_9689 | 16.61426 | MYO5C_ENSG00000128833                                                     |
| 15 | 52820696 | 52821565 | KD2-H4K8ac_peak_9690 | 11.24702 | MYO5A_ENSG00000197535                                                     |
| 15 | 52860793 | 52861841 | KD2-H4K8ac_peak_9691 | 9.36516  | ARPP19_ENSG00000128989                                                    |
| 15 | 52970676 | 52971474 | KD2-H4K8ac_peak_9692 | 4.06758  |                                                                           |
| 15 | 53082689 | 53082941 | KD2-H4K8ac_peak_9693 | 10.94736 | ONECUT1_ENSG00000169856                                                   |
| 15 | 54124215 | 54124700 | KD2-H4K8ac_peak_9694 | 5.43522  |                                                                           |
| 15 | 55488526 | 55488965 | KD2-H4K8ac_peak_9695 | 4.54006  | RSL24D1_ENSG00000137876                                                   |
| 15 | 55581758 | 55582590 | KD2-H4K8ac_peak_9696 | 11.60333 |                                                                           |
| 15 | 55610712 | 55611748 | KD2-H4K8ac_peak_9697 | 17.21106 | RAB27A_ENSG00000069974;RP11-139H15.1_ENSG00000225973;PIGB_ENSG00000069943 |
| 15 | 55700845 | 55701355 | KD2-H4K8ac_peak_9698 | 4.42765  | CCPG1_ENSG00000260916;C15orf65_ENSG00000261652                            |
| 15 | 55790924 | 55791576 | KD2-H4K8ac_peak_9699 | 4.35724  | DYX1C1-CCPG1_ENSG00000261771                                              |
| 15 | 55879746 | 55881348 | KD2-H4K8ac_peak_9700 | 16.07006 | PYGO1_ENSG00000171016                                                     |
| 15 | 55960047 | 55960249 | KD2-H4K8ac_peak_9701 | 6.40683  |                                                                           |
| 15 | 55962703 | 55962950 | KD2-H4K8ac_peak_9702 | 7.12754  |                                                                           |
| 15 | 56034766 | 56035722 | KD2-H4K8ac_peak_9703 | 16.49944 | PRTG_ENSG00000166450                                                      |
| 15 | 56076902 | 56077342 | KD2-H4K8ac_peak_9704 | 10.1591  |                                                                           |

|    |          |          |                      |          |                                                                    |
|----|----------|----------|----------------------|----------|--------------------------------------------------------------------|
| 15 | 56078729 | 56078961 | KD2-H4K8ac_peak_9705 | 10.34425 |                                                                    |
| 15 | 56091485 | 56091859 | KD2-H4K8ac_peak_9706 | 7.44366  |                                                                    |
| 15 | 56111293 | 56111500 | KD2-H4K8ac_peak_9707 | 6.31143  |                                                                    |
| 15 | 56285350 | 56285722 | KD2-H4K8ac_peak_9708 | 6.66692  | NEDD4_ENSG00000069869                                              |
| 15 | 56535606 | 56536572 | KD2-H4K8ac_peak_9709 | 17.566   | RFX7_ENSG00000181827;TEX9_ENSG00000151575                          |
| 15 | 57025153 | 57026214 | KD2-H4K8ac_peak_9710 | 20.02161 |                                                                    |
| 15 | 57041679 | 57041900 | KD2-H4K8ac_peak_9711 | 5.25071  |                                                                    |
| 15 | 57179108 | 57179330 | KD2-H4K8ac_peak_9712 | 8.55271  |                                                                    |
| 15 | 57179570 | 57180282 | KD2-H4K8ac_peak_9713 | 8.23274  |                                                                    |
| 15 | 57210302 | 57210663 | KD2-H4K8ac_peak_9714 | 9.20193  | ZNF280D_ENSG00000137871;TCF12_ENSG00000140262                      |
| 15 | 57210889 | 57211431 | KD2-H4K8ac_peak_9715 | 10.77651 | ZNF280D_ENSG00000137871;TCF12_ENSG00000140262                      |
| 15 | 57211661 | 57212312 | KD2-H4K8ac_peak_9716 | 5.88845  | ZNF280D_ENSG00000137871;TCF12_ENSG00000140262                      |
| 15 | 57599084 | 57599282 | KD2-H4K8ac_peak_9717 | 7.76329  |                                                                    |
| 15 | 57668348 | 57668904 | KD2-H4K8ac_peak_9718 | 11.92978 | CGNL1_ENSG00000128849                                              |
| 15 | 57680065 | 57680384 | KD2-H4K8ac_peak_9719 | 5.01002  |                                                                    |
| 15 | 57750827 | 57751032 | KD2-H4K8ac_peak_9720 | 8.94415  |                                                                    |
| 15 | 57788987 | 57789436 | KD2-H4K8ac_peak_9721 | 9.72244  |                                                                    |
| 15 | 57811933 | 57812128 | KD2-H4K8ac_peak_9722 | 5.61377  |                                                                    |
| 15 | 57884207 | 57884525 | KD2-H4K8ac_peak_9723 | 16.09057 | GCOM1_ENSG00000137878;MYZAP_ENSG00000263155;POLR2M_ENSG00000255529 |
| 15 | 57918285 | 57918482 | KD2-H4K8ac_peak_9724 | 4.14296  |                                                                    |
| 15 | 57988506 | 57988752 | KD2-H4K8ac_peak_9725 | 7.13615  |                                                                    |
| 15 | 57998140 | 57998381 | KD2-H4K8ac_peak_9726 | 6.56211  |                                                                    |
| 15 | 57998922 | 57999401 | KD2-H4K8ac_peak_9727 | 17.38513 |                                                                    |
| 15 | 58357692 | 58357952 | KD2-H4K8ac_peak_9728 | 5.61067  | CTD-2330J20.2_ENSG00000259285                                      |
| 15 | 58624159 | 58624353 | KD2-H4K8ac_peak_9729 | 4.42765  |                                                                    |
| 15 | 58624572 | 58625260 | KD2-H4K8ac_peak_9730 | 8.5781   |                                                                    |
| 15 | 58856957 | 58857296 | KD2-H4K8ac_peak_9731 | 4.9025   |                                                                    |
| 15 | 59063557 | 59064119 | KD2-H4K8ac_peak_9732 | 7.0754   | RP11-30K9.6_ENSG00000245975;FAM63B_ENSG00000128923                 |
| 15 | 59225273 | 59225726 | KD2-H4K8ac_peak_9733 | 12.30509 | SLTM_ENSG00000137776                                               |
| 15 | 59226096 | 59226586 | KD2-H4K8ac_peak_9734 | 6.36375  | SLTM_ENSG00000137776                                               |
| 15 | 59397388 | 59397700 | KD2-H4K8ac_peak_9735 | 10.68431 | CCNB2_ENSG00000157456                                              |
| 15 | 59463337 | 59463555 | KD2-H4K8ac_peak_9736 | 6.65673  | MIR2116_ENSG00000253030                                            |
| 15 | 59663995 | 59665116 | KD2-H4K8ac_peak_9737 | 10.2048  | MYO1E_ENSG00000157483;FAM81A_ENSG00000157470                       |
| 15 | 59981130 | 59981403 | KD2-H4K8ac_peak_9738 | 5.94405  | RP11-361D15.2_ENSG00000259238;BNIP2_ENSG00000140299                |
| 15 | 59994134 | 59994395 | KD2-H4K8ac_peak_9739 | 7.12754  |                                                                    |
| 15 | 60158246 | 60158493 | KD2-H4K8ac_peak_9740 | 7.27716  |                                                                    |
| 15 | 60159570 | 60159816 | KD2-H4K8ac_peak_9741 | 5.25071  |                                                                    |
| 15 | 60651683 | 60651945 | KD2-H4K8ac_peak_9742 | 8.41122  |                                                                    |
| 15 | 60666140 | 60666351 | KD2-H4K8ac_peak_9743 | 8.70735  |                                                                    |
| 15 | 60666949 | 60667187 | KD2-H4K8ac_peak_9744 | 10.19949 |                                                                    |
| 15 | 60770962 | 60771322 | KD2-H4K8ac_peak_9745 | 13.50024 | NARG2_ENSG00000128915;RP11-219B17.1_ENSG00000245534                |
| 15 | 60884267 | 60884553 | KD2-H4K8ac_peak_9746 | 5.20998  |                                                                    |
| 15 | 60884882 | 60885171 | KD2-H4K8ac_peak_9747 | 7.07117  |                                                                    |
| 15 | 61126859 | 61127073 | KD2-H4K8ac_peak_9748 | 5.57044  |                                                                    |
| 15 | 61494320 | 61494545 | KD2-H4K8ac_peak_9749 | 6.75488  |                                                                    |
| 15 | 61496183 | 61496424 | KD2-H4K8ac_peak_9750 | 7.11925  |                                                                    |



|    |          |          |                      |          |                                                    |
|----|----------|----------|----------------------|----------|----------------------------------------------------|
| 15 | 61521693 | 61522077 | KD2-H4K8ac_peak_9751 | 9.11031  | RORA_ENSG00000069667                               |
| 15 | 62206617 | 62206934 | KD2-H4K8ac_peak_9752 | 4.9025   | RN7SL613P_ENSG00000264376                          |
| 15 | 62207422 | 62207623 | KD2-H4K8ac_peak_9753 | 5.88845  | RN7SL613P_ENSG00000264376                          |
| 15 | 62360410 | 62361011 | KD2-H4K8ac_peak_9754 | 17.8868  |                                                    |
| 15 | 62403279 | 62403779 | KD2-H4K8ac_peak_9755 | 7.76329  |                                                    |
| 15 | 62681641 | 62681907 | KD2-H4K8ac_peak_9756 | 6.03693  | TLN2_ENSG00000171914                               |
| 15 | 62682219 | 62682936 | KD2-H4K8ac_peak_9757 | 13.12288 | TLN2_ENSG00000171914                               |
| 15 | 62917309 | 62917750 | KD2-H4K8ac_peak_9758 | 9.11031  |                                                    |
| 15 | 62917969 | 62918209 | KD2-H4K8ac_peak_9759 | 4.01115  |                                                    |
| 15 | 63074636 | 63074875 | KD2-H4K8ac_peak_9760 | 9.31907  |                                                    |
| 15 | 63221276 | 63221468 | KD2-H4K8ac_peak_9761 | 6.00226  |                                                    |
| 15 | 63227540 | 63227858 | KD2-H4K8ac_peak_9762 | 5.29555  |                                                    |
| 15 | 63340747 | 63341104 | KD2-H4K8ac_peak_9763 | 7.0754   | RP11-244F12.3_ENSG00000259498                      |
| 15 | 63413483 | 63413848 | KD2-H4K8ac_peak_9764 | 3.87414  | LACTB_ENSG00000103642                              |
| 15 | 63449828 | 63450308 | KD2-H4K8ac_peak_9765 | 11.66477 | RPS27L_ENSG00000185088                             |
| 15 | 63481132 | 63481553 | KD2-H4K8ac_peak_9766 | 16.32216 | RAB8B_ENSG00000166128                              |
| 15 | 63569236 | 63569496 | KD2-H4K8ac_peak_9767 | 6.0073   |                                                    |
| 15 | 63569829 | 63570177 | KD2-H4K8ac_peak_9768 | 12.06346 |                                                    |
| 15 | 63728965 | 63729635 | KD2-H4K8ac_peak_9769 | 7.76104  |                                                    |
| 15 | 63796070 | 63796377 | KD2-H4K8ac_peak_9770 | 5.4779   | USP3_ENSG00000140455                               |
| 15 | 63796857 | 63797670 | KD2-H4K8ac_peak_9771 | 17.75427 | USP3_ENSG00000140455                               |
| 15 | 63892731 | 63893004 | KD2-H4K8ac_peak_9772 | 3.86308  | USP3-AS1_ENSG00000259248                           |
| 15 | 63893276 | 63893692 | KD2-H4K8ac_peak_9773 | 7.76104  | USP3-AS1_ENSG00000259248                           |
| 15 | 64126297 | 64126800 | KD2-H4K8ac_peak_9774 | 14.15383 | HERC1_ENSG00000103657                              |
| 15 | 64237756 | 64238454 | KD2-H4K8ac_peak_9775 | 7.76329  |                                                    |
| 15 | 64386409 | 64386964 | KD2-H4K8ac_peak_9776 | 10.99365 | FAM96A_ENSG00000166797;SNX1_ENSG00000028528        |
| 15 | 64388324 | 64388575 | KD2-H4K8ac_peak_9777 | 9.96798  |                                                    |
| 15 | 64439432 | 64439979 | KD2-H4K8ac_peak_9778 | 12.61258 |                                                    |
| 15 | 64647810 | 64648315 | KD2-H4K8ac_peak_9779 | 7.67504  | CSNK1G1_ENSG00000169118                            |
| 15 | 65067064 | 65067556 | KD2-H4K8ac_peak_9780 | 10.78136 | RBPMS2_ENSG00000166831                             |
| 15 | 65068047 | 65068311 | KD2-H4K8ac_peak_9781 | 10.70006 | RBPMS2_ENSG00000166831                             |
| 15 | 65104651 | 65104939 | KD2-H4K8ac_peak_9782 | 6.30229  |                                                    |
| 15 | 65105768 | 65106005 | KD2-H4K8ac_peak_9783 | 8.30974  |                                                    |
| 15 | 65118493 | 65118714 | KD2-H4K8ac_peak_9784 | 4.37709  | PIF1_ENSG00000140451                               |
| 15 | 65132985 | 65133833 | KD2-H4K8ac_peak_9785 | 16.09057 | AC069368.3_ENSG00000249240;PLEKHO2_ENSG00000241839 |
| 15 | 65149302 | 65149510 | KD2-H4K8ac_peak_9786 | 10.29344 |                                                    |
| 15 | 65203657 | 65203852 | KD2-H4K8ac_peak_9787 | 5.9696   | ANKDD1A_ENSG00000166839                            |
| 15 | 65281622 | 65282175 | KD2-H4K8ac_peak_9788 | 20.96279 | SPG21_ENSG00000090487                              |
| 15 | 65284172 | 65284369 | KD2-H4K8ac_peak_9789 | 6.16888  |                                                    |
| 15 | 65321391 | 65321892 | KD2-H4K8ac_peak_9790 | 6.66692  | MTFMT_ENSG00000103707                              |
| 15 | 65359990 | 65360586 | KD2-H4K8ac_peak_9791 | 8.86391  |                                                    |
| 15 | 65425353 | 65426086 | KD2-H4K8ac_peak_9792 | 10.96455 | PDCD7_ENSG00000090470                              |
| 15 | 65426409 | 65426914 | KD2-H4K8ac_peak_9793 | 6.98292  | PDCD7_ENSG00000090470                              |
| 15 | 65477369 | 65478142 | KD2-H4K8ac_peak_9794 | 13.81781 | CLPX_ENSG00000166855                               |
| 15 | 65578496 | 65578880 | KD2-H4K8ac_peak_9795 | 8.55271  | SNORA24_ENSG00000206903                            |
| 15 | 65595951 | 65596481 | KD2-H4K8ac_peak_9796 | 6.0073   | RNU5B-1_ENSG00000200156                            |

|    |          |          |                      |          |                                                    |
|----|----------|----------|----------------------|----------|----------------------------------------------------|
| 15 | 65626579 | 65627136 | KD2-H4K8ac_peak_9797 | 8.53092  |                                                    |
| 15 | 65628870 | 65629798 | KD2-H4K8ac_peak_9798 | 10.05606 |                                                    |
| 15 | 65638844 | 65639185 | KD2-H4K8ac_peak_9799 | 9.05418  |                                                    |
| 15 | 65660865 | 65661169 | KD2-H4K8ac_peak_9800 | 4.86324  |                                                    |
| 15 | 65662096 | 65662314 | KD2-H4K8ac_peak_9801 | 4.12757  |                                                    |
| 15 | 65669630 | 65670236 | KD2-H4K8ac_peak_9802 | 7.76329  | IGDCC3_ENSG00000174498                             |
| 15 | 65677389 | 65678027 | KD2-H4K8ac_peak_9803 | 11.52628 |                                                    |
| 15 | 65714165 | 65714360 | KD2-H4K8ac_peak_9804 | 6.25869  |                                                    |
| 15 | 65809702 | 65810008 | KD2-H4K8ac_peak_9805 | 11.80283 | DPP8_ENSG00000074603                               |
| 15 | 65810286 | 65810637 | KD2-H4K8ac_peak_9806 | 5.20908  | DPP8_ENSG00000074603                               |
| 15 | 65822943 | 65823424 | KD2-H4K8ac_peak_9807 | 15.82362 | PTPLAD1_ENSG00000074696                            |
| 15 | 65871782 | 65872010 | KD2-H4K8ac_peak_9808 | 8.93112  |                                                    |
| 15 | 65873507 | 65873724 | KD2-H4K8ac_peak_9809 | 12.20507 |                                                    |
| 15 | 65902523 | 65902721 | KD2-H4K8ac_peak_9810 | 7.79558  | VWA9_ENSG00000138614;SLC24A1_ENSG00000074621       |
| 15 | 65902927 | 65903443 | KD2-H4K8ac_peak_9811 | 18.5703  | VWA9_ENSG00000138614;SLC24A1_ENSG00000074621       |
| 15 | 66125233 | 66125494 | KD2-H4K8ac_peak_9812 | 9.1707   |                                                    |
| 15 | 66161883 | 66162232 | KD2-H4K8ac_peak_9813 | 8.28234  |                                                    |
| 15 | 66246851 | 66247185 | KD2-H4K8ac_peak_9814 | 6.14257  |                                                    |
| 15 | 66430006 | 66430585 | KD2-H4K8ac_peak_9815 | 5.20908  |                                                    |
| 15 | 66431005 | 66431472 | KD2-H4K8ac_peak_9816 | 5.28072  |                                                    |
| 15 | 66470936 | 66471154 | KD2-H4K8ac_peak_9817 | 5.57044  |                                                    |
| 15 | 66504647 | 66505009 | KD2-H4K8ac_peak_9818 | 7.70289  |                                                    |
| 15 | 66523550 | 66523781 | KD2-H4K8ac_peak_9819 | 6.40683  |                                                    |
| 15 | 66585694 | 66586675 | KD2-H4K8ac_peak_9820 | 10.5953  | RP11-653J6.1_ENSG00000261318;DIS3L_ENSG00000166938 |
| 15 | 66788960 | 66789251 | KD2-H4K8ac_peak_9821 | 4.66652  | SNAPC5_ENSG00000174446;MIR4512_ENSG00000266589     |
| 15 | 66796891 | 66797717 | KD2-H4K8ac_peak_9822 | 9.36516  | ZWILCH_ENSG00000174442                             |
| 15 | 66922959 | 66923592 | KD2-H4K8ac_peak_9823 | 8.4716   |                                                    |
| 15 | 66924024 | 66924301 | KD2-H4K8ac_peak_9824 | 7.76329  |                                                    |
| 15 | 66924641 | 66924843 | KD2-H4K8ac_peak_9825 | 7.69287  |                                                    |
| 15 | 66925286 | 66926058 | KD2-H4K8ac_peak_9826 | 8.55271  |                                                    |
| 15 | 66939709 | 66940058 | KD2-H4K8ac_peak_9827 | 8.59579  |                                                    |
| 15 | 66971590 | 66972210 | KD2-H4K8ac_peak_9828 | 12.10284 |                                                    |
| 15 | 66992920 | 66993368 | KD2-H4K8ac_peak_9829 | 14.70804 |                                                    |
| 15 | 67000076 | 67000284 | KD2-H4K8ac_peak_9830 | 5.88845  |                                                    |
| 15 | 67065185 | 67065401 | KD2-H4K8ac_peak_9831 | 6.89708  |                                                    |
| 15 | 67066352 | 67066676 | KD2-H4K8ac_peak_9832 | 8.34752  |                                                    |
| 15 | 67113481 | 67113686 | KD2-H4K8ac_peak_9833 | 4.91674  |                                                    |
| 15 | 67134659 | 67135418 | KD2-H4K8ac_peak_9834 | 12.06346 |                                                    |
| 15 | 67142944 | 67143270 | KD2-H4K8ac_peak_9835 | 4.42765  |                                                    |
| 15 | 67228633 | 67228963 | KD2-H4K8ac_peak_9836 | 8.30974  |                                                    |
| 15 | 67318179 | 67318392 | KD2-H4K8ac_peak_9837 | 8.17902  |                                                    |
| 15 | 67357190 | 67357644 | KD2-H4K8ac_peak_9838 | 9.63487  |                                                    |
| 15 | 67358205 | 67358520 | KD2-H4K8ac_peak_9839 | 7.47462  |                                                    |
| 15 | 67358913 | 67359138 | KD2-H4K8ac_peak_9840 | 6.25869  |                                                    |
| 15 | 67413595 | 67413829 | KD2-H4K8ac_peak_9841 | 5.14125  |                                                    |
| 15 | 67481848 | 67482068 | KD2-H4K8ac_peak_9842 | 9.31907  |                                                    |

|    |          |          |                      |          |                                                           |
|----|----------|----------|----------------------|----------|-----------------------------------------------------------|
| 15 | 67813051 | 67813284 | KD2-H4K8ac_peak_9843 | 7.96322  | IQCH-AS1_ENSG00000259673;C15orf61_ENSG00000189227         |
| 15 | 67813621 | 67814132 | KD2-H4K8ac_peak_9844 | 7.76329  | IQCH-AS1_ENSG00000259673;C15orf61_ENSG00000189227         |
| 15 | 67835067 | 67835761 | KD2-H4K8ac_peak_9845 | 15.22643 | RP11-502I4.3_ENSG00000270964;MAP2K5_ENSG00000137764       |
| 15 | 68125983 | 68126220 | KD2-H4K8ac_peak_9846 | 7.36799  | RP11-34F13.3_ENSG00000259410                              |
| 15 | 68155958 | 68156257 | KD2-H4K8ac_peak_9847 | 8.10216  |                                                           |
| 15 | 68176740 | 68177426 | KD2-H4K8ac_peak_9848 | 8.94469  |                                                           |
| 15 | 68260053 | 68260617 | KD2-H4K8ac_peak_9849 | 9.96798  |                                                           |
| 15 | 68260862 | 68261090 | KD2-H4K8ac_peak_9850 | 4.01115  |                                                           |
| 15 | 68491792 | 68492041 | KD2-H4K8ac_peak_9851 | 5.32137  |                                                           |
| 15 | 68502731 | 68503148 | KD2-H4K8ac_peak_9852 | 4.98318  |                                                           |
| 15 | 68521594 | 68521993 | KD2-H4K8ac_peak_9853 | 13.56049 | RP11-315D16.2_ENSG00000260007;AC107871.1_ENSG00000264779  |
| 15 | 68569406 | 68570643 | KD2-H4K8ac_peak_9854 | 18.31034 | RP11-315D16.4_ENSG00000260657;FEM1B_ENSG00000169018       |
| 15 | 68598798 | 68598993 | KD2-H4K8ac_peak_9855 | 6.85193  |                                                           |
| 15 | 68599346 | 68599570 | KD2-H4K8ac_peak_9856 | 5.29555  |                                                           |
| 15 | 68891054 | 68891450 | KD2-H4K8ac_peak_9857 | 5.9696   |                                                           |
| 15 | 68993018 | 68993429 | KD2-H4K8ac_peak_9858 | 5.75452  |                                                           |
| 15 | 69109617 | 69109848 | KD2-H4K8ac_peak_9859 | 6.37652  | SPESP1_ENSG00000258484                                    |
| 15 | 69110079 | 69112835 | KD2-H4K8ac_peak_9860 | 20.88898 | ANP32A_ENSG00000140350;SPESP1_ENSG00000258484             |
| 15 | 69323767 | 69324032 | KD2-H4K8ac_peak_9861 | 8.30974  |                                                           |
| 15 | 69366457 | 69367429 | KD2-H4K8ac_peak_9862 | 8.30974  |                                                           |
| 15 | 69373733 | 69374088 | KD2-H4K8ac_peak_9863 | 8.17902  | RP11-809H16.5_ENSG00000259222                             |
| 15 | 69453031 | 69453262 | KD2-H4K8ac_peak_9864 | 10.53377 | AC026512.1_ENSG00000266374                                |
| 15 | 69590905 | 69591124 | KD2-H4K8ac_peak_9865 | 5.9696   | RP11-352D13.6_ENSG00000261634;PAQR5_ENSG00000137819       |
| 15 | 69754682 | 69755004 | KD2-H4K8ac_peak_9866 | 7.76104  | RP11-253M7.4_ENSG00000259215;RP11-279F6.1_ENSG00000245750 |
| 15 | 69853307 | 69853709 | KD2-H4K8ac_peak_9867 | 5.55317  |                                                           |
| 15 | 70168405 | 70168700 | KD2-H4K8ac_peak_9868 | 6.99815  |                                                           |
| 15 | 70169188 | 70169417 | KD2-H4K8ac_peak_9869 | 9.11031  |                                                           |
| 15 | 70173706 | 70173921 | KD2-H4K8ac_peak_9870 | 4.77079  |                                                           |
| 15 | 70354197 | 70354391 | KD2-H4K8ac_peak_9871 | 6.13909  |                                                           |
| 15 | 70388732 | 70389153 | KD2-H4K8ac_peak_9872 | 3.86308  |                                                           |
| 15 | 70389381 | 70389754 | KD2-H4K8ac_peak_9873 | 9.36516  | TLE3_ENSG00000140332                                      |
| 15 | 70390979 | 70391848 | KD2-H4K8ac_peak_9874 | 13.80019 | TLE3_ENSG00000140332                                      |
| 15 | 70392651 | 70393064 | KD2-H4K8ac_peak_9875 | 7.67504  |                                                           |
| 15 | 70444513 | 70444908 | KD2-H4K8ac_peak_9876 | 4.42765  |                                                           |
| 15 | 70446200 | 70446499 | KD2-H4K8ac_peak_9877 | 14.98671 |                                                           |
| 15 | 70446808 | 70447250 | KD2-H4K8ac_peak_9878 | 12.69604 |                                                           |
| 15 | 70457649 | 70457853 | KD2-H4K8ac_peak_9879 | 5.9696   |                                                           |
| 15 | 70462669 | 70462909 | KD2-H4K8ac_peak_9880 | 8.52559  |                                                           |
| 15 | 70478026 | 70479193 | KD2-H4K8ac_peak_9881 | 17.43705 |                                                           |
| 15 | 70488043 | 70489008 | KD2-H4K8ac_peak_9882 | 17.19888 |                                                           |
| 15 | 70491235 | 70491677 | KD2-H4K8ac_peak_9883 | 6.8108   | AC011648.1_ENSG00000259252                                |
| 15 | 70540621 | 70541058 | KD2-H4K8ac_peak_9884 | 6.67092  |                                                           |
| 15 | 70543363 | 70544113 | KD2-H4K8ac_peak_9885 | 6.60096  |                                                           |
| 15 | 70544682 | 70545097 | KD2-H4K8ac_peak_9886 | 6.66692  |                                                           |
| 15 | 70556050 | 70556273 | KD2-H4K8ac_peak_9887 | 12.86466 |                                                           |
| 15 | 70565433 | 70565670 | KD2-H4K8ac_peak_9888 | 9.5326   |                                                           |

|    |          |          |                      |          |                                                                            |
|----|----------|----------|----------------------|----------|----------------------------------------------------------------------------|
| 15 | 70593241 | 70593485 | KD2-H4K8ac_peak_9889 | 4.37708  |                                                                            |
| 15 | 70615577 | 70615930 | KD2-H4K8ac_peak_9890 | 7.22457  |                                                                            |
| 15 | 70616867 | 70617153 | KD2-H4K8ac_peak_9891 | 6.68439  |                                                                            |
| 15 | 70629308 | 70629632 | KD2-H4K8ac_peak_9892 | 6.31143  |                                                                            |
| 15 | 70632744 | 70633349 | KD2-H4K8ac_peak_9893 | 9.402    |                                                                            |
| 15 | 70634022 | 70634601 | KD2-H4K8ac_peak_9894 | 8.90871  |                                                                            |
| 15 | 70649898 | 70650180 | KD2-H4K8ac_peak_9895 | 6.40683  |                                                                            |
| 15 | 70650423 | 70650680 | KD2-H4K8ac_peak_9896 | 6.56926  |                                                                            |
| 15 | 70666757 | 70666984 | KD2-H4K8ac_peak_9897 | 4.98072  |                                                                            |
| 15 | 70667355 | 70668070 | KD2-H4K8ac_peak_9898 | 6.30229  |                                                                            |
| 15 | 70668417 | 70668766 | KD2-H4K8ac_peak_9899 | 4.44923  |                                                                            |
| 15 | 70669755 | 70669990 | KD2-H4K8ac_peak_9900 | 12.84642 |                                                                            |
| 15 | 70670740 | 70671160 | KD2-H4K8ac_peak_9901 | 6.99815  |                                                                            |
| 15 | 70677420 | 70677679 | KD2-H4K8ac_peak_9902 | 6.81873  |                                                                            |
| 15 | 70677939 | 70678486 | KD2-H4K8ac_peak_9903 | 9.63487  |                                                                            |
| 15 | 70679569 | 70680589 | KD2-H4K8ac_peak_9904 | 9.1707   |                                                                            |
| 15 | 70726472 | 70726719 | KD2-H4K8ac_peak_9905 | 4.10597  |                                                                            |
| 15 | 70770885 | 70771148 | KD2-H4K8ac_peak_9906 | 6.83936  |                                                                            |
| 15 | 70818849 | 70819884 | KD2-H4K8ac_peak_9907 | 8.59579  |                                                                            |
| 15 | 70850007 | 70850220 | KD2-H4K8ac_peak_9908 | 5.57044  |                                                                            |
| 15 | 70851634 | 70852038 | KD2-H4K8ac_peak_9909 | 5.6755   |                                                                            |
| 15 | 70898059 | 70898581 | KD2-H4K8ac_peak_9910 | 7.76329  |                                                                            |
| 15 | 71146231 | 71146460 | KD2-H4K8ac_peak_9911 | 11.24702 | LARP6_ENSG00000166173;LRRC49_ENSG00000137821                               |
| 15 | 71146662 | 71146897 | KD2-H4K8ac_peak_9912 | 13.70605 | LARP6_ENSG00000166173                                                      |
| 15 | 71184375 | 71184714 | KD2-H4K8ac_peak_9913 | 10.87093 | THAP10_ENSG00000129028                                                     |
| 15 | 71184920 | 71185374 | KD2-H4K8ac_peak_9914 | 6.65673  | THAP10_ENSG00000129028                                                     |
| 15 | 72448076 | 72448479 | KD2-H4K8ac_peak_9915 | 4.86324  | RP11-2117.4_ENSG00000260173                                                |
| 15 | 72489547 | 72489757 | KD2-H4K8ac_peak_9916 | 4.66652  | GRAMD2_ENSG00000175318                                                     |
| 15 | 72522416 | 72522704 | KD2-H4K8ac_peak_9917 | 13.9234  |                                                                            |
| 15 | 72523873 | 72524160 | KD2-H4K8ac_peak_9918 | 8.10216  | PKM_ENSG00000067225                                                        |
| 15 | 72564528 | 72564874 | KD2-H4K8ac_peak_9919 | 14.69247 | PARP6_ENSG00000137817                                                      |
| 15 | 72667871 | 72668266 | KD2-H4K8ac_peak_9920 | 11.92978 | RP11-106M3.2_ENSG00000260729;HEXA_ENSG00000213614;HEXA-AS1_ENSG00000260339 |
| 15 | 72668521 | 72669178 | KD2-H4K8ac_peak_9921 | 6.40297  | RP11-106M3.2_ENSG00000260729;HEXA_ENSG00000213614;HEXA-AS1_ENSG00000260339 |
| 15 | 72766107 | 72766500 | KD2-H4K8ac_peak_9922 | 13.73635 | ARIH1_ENSG00000166233                                                      |
| 15 | 72766713 | 72767120 | KD2-H4K8ac_peak_9923 | 9.96798  | RP11-1007O24.3_ENSG00000261423;ARIH1_ENSG00000166233                       |
| 15 | 72930206 | 72930452 | KD2-H4K8ac_peak_9924 | 7.12754  | RP11-1006G14.2_ENSG00000259783;RP11-1006G14.3_ENSG00000259909              |
| 15 | 72963080 | 72963362 | KD2-H4K8ac_peak_9925 | 11.05407 |                                                                            |
| 15 | 72978211 | 72978498 | KD2-H4K8ac_peak_9926 | 13.34404 | HIGD2B_ENSG00000175202;BBS4_ENSG00000140463                                |
| 15 | 73075682 | 73076020 | KD2-H4K8ac_peak_9927 | 6.66359  | ADPGK-AS1_ENSG00000260898                                                  |
| 15 | 73076338 | 73076593 | KD2-H4K8ac_peak_9928 | 7.67504  |                                                                            |
| 15 | 73077364 | 73077556 | KD2-H4K8ac_peak_9929 | 6.56926  | ADPGK_ENSG00000159322                                                      |
| 15 | 73088856 | 73089871 | KD2-H4K8ac_peak_9930 | 10.05606 |                                                                            |
| 15 | 73343782 | 73344322 | KD2-H4K8ac_peak_9931 | 7.76104  | NEO1_ENSG00000067141                                                       |
| 15 | 73344947 | 73345372 | KD2-H4K8ac_peak_9932 | 7.22457  | NEO1_ENSG00000067141                                                       |
| 15 | 73926049 | 73926669 | KD2-H4K8ac_peak_9933 | 5.08628  | NPTN_ENSG00000156642                                                       |
| 15 | 73976116 | 73977187 | KD2-H4K8ac_peak_9934 | 26.59781 | CD276_ENSG00000103855                                                      |

|    |          |          |                      |          |                                           |
|----|----------|----------|----------------------|----------|-------------------------------------------|
| 15 | 74044704 | 74044958 | KD2-H4K8ac_peak_9935 | 6.56211  | C15orf59_ENSG00000205363                  |
| 15 | 74067428 | 74067625 | KD2-H4K8ac_peak_9936 | 6.47962  |                                           |
| 15 | 74231532 | 74231883 | KD2-H4K8ac_peak_9937 | 5.54647  |                                           |
| 15 | 74236380 | 74237079 | KD2-H4K8ac_peak_9938 | 12.82393 |                                           |
| 15 | 74238196 | 74238529 | KD2-H4K8ac_peak_9939 | 4.211    |                                           |
| 15 | 74242847 | 74243142 | KD2-H4K8ac_peak_9940 | 8.28234  |                                           |
| 15 | 74243350 | 74243593 | KD2-H4K8ac_peak_9941 | 9.95119  |                                           |
| 15 | 74243926 | 74245239 | KD2-H4K8ac_peak_9942 | 13.80019 |                                           |
| 15 | 74265145 | 74265947 | KD2-H4K8ac_peak_9943 | 11.24702 |                                           |
| 15 | 74275098 | 74275544 | KD2-H4K8ac_peak_9944 | 7.70289  |                                           |
| 15 | 74284845 | 74285165 | KD2-H4K8ac_peak_9945 | 9.1707   |                                           |
| 15 | 74286621 | 74286917 | KD2-H4K8ac_peak_9946 | 7.22936  | STOML1_ENSG0000067221;PML_ENSG00000140464 |
| 15 | 74287489 | 74287698 | KD2-H4K8ac_peak_9947 | 6.53915  | STOML1_ENSG0000067221;PML_ENSG00000140464 |
| 15 | 74392370 | 74392566 | KD2-H4K8ac_peak_9948 | 8.55271  | ISLR2_ENSG00000167178                     |
| 15 | 74420515 | 74422280 | KD2-H4K8ac_peak_9949 | 16.57619 | RP11-247C2.2_ENSG00000248540              |
| 15 | 74422751 | 74423298 | KD2-H4K8ac_peak_9950 | 9.20502  |                                           |
| 15 | 74428446 | 74428718 | KD2-H4K8ac_peak_9951 | 7.04698  |                                           |
| 15 | 74429075 | 74429496 | KD2-H4K8ac_peak_9952 | 16.43913 |                                           |
| 15 | 74431253 | 74431475 | KD2-H4K8ac_peak_9953 | 5.82799  |                                           |
| 15 | 74466213 | 74466690 | KD2-H4K8ac_peak_9954 | 3.90565  | ISLR_ENSG00000129009                      |
| 15 | 74466904 | 74468463 | KD2-H4K8ac_peak_9955 | 9.62006  | ISLR_ENSG00000129009                      |
| 15 | 74468677 | 74469089 | KD2-H4K8ac_peak_9956 | 8.73935  |                                           |
| 15 | 74472138 | 74472380 | KD2-H4K8ac_peak_9957 | 5.00593  | RP11-665J16.1_ENSG00000261543             |
| 15 | 74492080 | 74492444 | KD2-H4K8ac_peak_9958 | 4.42643  |                                           |
| 15 | 74493332 | 74494086 | KD2-H4K8ac_peak_9959 | 11.23023 | RP11-60L3.1_ENSG00000259264               |
| 15 | 74494301 | 74495360 | KD2-H4K8ac_peak_9960 | 13.95627 | RP11-60L3.1_ENSG00000259264               |
| 15 | 74495630 | 74495916 | KD2-H4K8ac_peak_9961 | 9.91109  | RP11-60L3.1_ENSG00000259264               |
| 15 | 74496162 | 74497103 | KD2-H4K8ac_peak_9962 | 10.33736 |                                           |
| 15 | 74514059 | 74515051 | KD2-H4K8ac_peak_9963 | 7.49599  |                                           |
| 15 | 74515309 | 74515868 | KD2-H4K8ac_peak_9964 | 10.19949 |                                           |
| 15 | 74516237 | 74516918 | KD2-H4K8ac_peak_9965 | 21.50391 |                                           |
| 15 | 74518125 | 74519460 | KD2-H4K8ac_peak_9966 | 10.97565 |                                           |
| 15 | 74519721 | 74520033 | KD2-H4K8ac_peak_9967 | 6.25869  |                                           |
| 15 | 74520284 | 74520978 | KD2-H4K8ac_peak_9968 | 7.76329  |                                           |
| 15 | 74521453 | 74521925 | KD2-H4K8ac_peak_9969 | 7.76104  |                                           |
| 15 | 74526200 | 74526814 | KD2-H4K8ac_peak_9970 | 7.76329  |                                           |
| 15 | 74531497 | 74532080 | KD2-H4K8ac_peak_9971 | 5.75757  |                                           |
| 15 | 74532964 | 74533967 | KD2-H4K8ac_peak_9972 | 6.25869  |                                           |
| 15 | 74534506 | 74534985 | KD2-H4K8ac_peak_9973 | 6.20982  |                                           |
| 15 | 74535227 | 74535438 | KD2-H4K8ac_peak_9974 | 7.36799  |                                           |
| 15 | 74537543 | 74537766 | KD2-H4K8ac_peak_9975 | 14.4458  |                                           |
| 15 | 74543396 | 74543934 | KD2-H4K8ac_peak_9976 | 8.30974  |                                           |
| 15 | 74551424 | 74551807 | KD2-H4K8ac_peak_9977 | 6.99815  |                                           |
| 15 | 74568727 | 74569261 | KD2-H4K8ac_peak_9978 | 5.66317  |                                           |
| 15 | 74575503 | 74575776 | KD2-H4K8ac_peak_9979 | 9.95119  |                                           |
| 15 | 74581661 | 74582060 | KD2-H4K8ac_peak_9980 | 5.30799  |                                           |

|    |          |          |                       |          |                                                    |
|----|----------|----------|-----------------------|----------|----------------------------------------------------|
| 15 | 74582549 | 74583183 | KD2-H4K8ac_peak_9981  | 8.58619  |                                                    |
| 15 | 74584189 | 74585267 | KD2-H4K8ac_peak_9982  | 13.81781 |                                                    |
| 15 | 74585867 | 74586385 | KD2-H4K8ac_peak_9983  | 16.3889  |                                                    |
| 15 | 74586814 | 74587306 | KD2-H4K8ac_peak_9984  | 6.99815  |                                                    |
| 15 | 74589195 | 74590426 | KD2-H4K8ac_peak_9985  | 8.30974  |                                                    |
| 15 | 74591423 | 74591622 | KD2-H4K8ac_peak_9986  | 9.03107  |                                                    |
| 15 | 74593350 | 74593854 | KD2-H4K8ac_peak_9987  | 11.80002 |                                                    |
| 15 | 74594463 | 74595195 | KD2-H4K8ac_peak_9988  | 8.88082  | RP11-60L3.2_ENSG00000261384                        |
| 15 | 74595492 | 74596213 | KD2-H4K8ac_peak_9989  | 11.55163 | RP11-60L3.2_ENSG00000261384                        |
| 15 | 74597059 | 74597316 | KD2-H4K8ac_peak_9990  | 8.82006  |                                                    |
| 15 | 74599263 | 74599504 | KD2-H4K8ac_peak_9991  | 4.211    |                                                    |
| 15 | 74600805 | 74601242 | KD2-H4K8ac_peak_9992  | 5.30799  |                                                    |
| 15 | 74604427 | 74604723 | KD2-H4K8ac_peak_9993  | 6.0605   |                                                    |
| 15 | 74605157 | 74605608 | KD2-H4K8ac_peak_9994  | 6.82618  |                                                    |
| 15 | 74610615 | 74611104 | KD2-H4K8ac_peak_9995  | 9.62006  |                                                    |
| 15 | 74613241 | 74613507 | KD2-H4K8ac_peak_9996  | 10.19949 |                                                    |
| 15 | 74615007 | 74615374 | KD2-H4K8ac_peak_9997  | 19.7067  |                                                    |
| 15 | 74667062 | 74667276 | KD2-H4K8ac_peak_9998  | 4.56666  |                                                    |
| 15 | 74725822 | 74726131 | KD2-H4K8ac_peak_9999  | 5.92591  | SEMA7A_ENSG00000138623                             |
| 15 | 74726479 | 74726703 | KD2-H4K8ac_peak_10000 | 4.211    | SEMA7A_ENSG00000138623                             |
| 15 | 74753189 | 74753401 | KD2-H4K8ac_peak_10001 | 5.57044  | UBL7_ENSG00000138629;UBL7-AS1_ENSG00000247240      |
| 15 | 74753674 | 74754012 | KD2-H4K8ac_peak_10002 | 7.27716  | UBL7_ENSG00000138629;UBL7-AS1_ENSG00000247240      |
| 15 | 74832896 | 74833210 | KD2-H4K8ac_peak_10003 | 5.54647  | ARID3B_ENSG00000179361                             |
| 15 | 74833590 | 74833832 | KD2-H4K8ac_peak_10004 | 12.93209 | ARID3B_ENSG00000179361                             |
| 15 | 74834105 | 74834325 | KD2-H4K8ac_peak_10005 | 9.402    | ARID3B_ENSG00000179361                             |
| 15 | 74890931 | 74891371 | KD2-H4K8ac_peak_10006 | 10.43145 | CLK3_ENSG00000179335                               |
| 15 | 74906642 | 74907020 | KD2-H4K8ac_peak_10007 | 9.08816  | CTD-3154N5.1_ENSG00000260919                       |
| 15 | 74907317 | 74907936 | KD2-H4K8ac_peak_10008 | 18.39704 | CTD-3154N5.1_ENSG00000260919                       |
| 15 | 74908286 | 74908719 | KD2-H4K8ac_peak_10009 | 7.90806  | CTD-3154N5.1_ENSG00000260919                       |
| 15 | 74988006 | 74988917 | KD2-H4K8ac_peak_10010 | 13.35993 | EDC3_ENSG00000179151                               |
| 15 | 75018388 | 75018813 | KD2-H4K8ac_peak_10011 | 7.146    | CYP1A1_ENSG00000140465                             |
| 15 | 75074504 | 75075099 | KD2-H4K8ac_peak_10012 | 11.89502 | CSK_ENSG00000103653                                |
| 15 | 75135114 | 75135449 | KD2-H4K8ac_peak_10013 | 13.3695  | ULK3_ENSG00000140474                               |
| 15 | 75135690 | 75135979 | KD2-H4K8ac_peak_10014 | 11.00372 | ULK3_ENSG00000140474                               |
| 15 | 75165445 | 75165668 | KD2-H4K8ac_peak_10015 | 9.35804  | SCAMP2_ENSG00000140497                             |
| 15 | 75165898 | 75166237 | KD2-H4K8ac_peak_10016 | 8.55552  | SCAMP2_ENSG00000140497                             |
| 15 | 75166498 | 75166697 | KD2-H4K8ac_peak_10017 | 6.40683  | SCAMP2_ENSG00000140497                             |
| 15 | 75181414 | 75182961 | KD2-H4K8ac_peak_10018 | 12.84642 | MPI_ENSG00000178802                                |
| 15 | 75199434 | 75199663 | KD2-H4K8ac_peak_10019 | 7.36799  | FAM219B_ENSG00000178761                            |
| 15 | 75230728 | 75231181 | KD2-H4K8ac_peak_10020 | 18.95762 | COX5A_ENSG00000178741                              |
| 15 | 75248153 | 75248535 | KD2-H4K8ac_peak_10021 | 8.28234  |                                                    |
| 15 | 75248741 | 75250063 | KD2-H4K8ac_peak_10022 | 19.35989 | RPP25_ENSG00000178718;SCAMP5_ENSG00000198794       |
| 15 | 75287924 | 75288552 | KD2-H4K8ac_peak_10023 | 11.58876 |                                                    |
| 15 | 75315980 | 75316294 | KD2-H4K8ac_peak_10024 | 11.89502 | RP11-151H2.1_ENSG00000260483;PPCDC_ENSG00000138621 |
| 15 | 75339062 | 75340843 | KD2-H4K8ac_peak_10025 | 16.3486  |                                                    |
| 15 | 75471568 | 75471976 | KD2-H4K8ac_peak_10026 | 6.66692  |                                                    |

|    |          |          |                       |          |                                                                                 |
|----|----------|----------|-----------------------|----------|---------------------------------------------------------------------------------|
| 15 | 75472754 | 75473224 | KD2-H4K8ac_peak_10027 | 11.68645 |                                                                                 |
| 15 | 75487985 | 75488373 | KD2-H4K8ac_peak_10028 | 12.30509 | C15orf39_ENSG00000167173                                                        |
| 15 | 75570865 | 75571058 | KD2-H4K8ac_peak_10029 | 6.99815  |                                                                                 |
| 15 | 75628423 | 75628873 | KD2-H4K8ac_peak_10030 | 11.50346 | COMMD4_ENSG00000140365                                                          |
| 15 | 75639660 | 75639898 | KD2-H4K8ac_peak_10031 | 6.40297  | NEIL1_ENSG00000140398                                                           |
| 15 | 75640200 | 75640690 | KD2-H4K8ac_peak_10032 | 7.43893  | NEIL1_ENSG00000140398                                                           |
| 15 | 75660494 | 75660917 | KD2-H4K8ac_peak_10033 | 14.68449 | MAN2C1_ENSG00000140400;RP11-817O13.8_ENSG00000260274                            |
| 15 | 75746001 | 75746293 | KD2-H4K8ac_peak_10034 | 10.44656 |                                                                                 |
| 15 | 75746696 | 75747205 | KD2-H4K8ac_peak_10035 | 9.43437  | SIN3A_ENSG00000169375                                                           |
| 15 | 75870667 | 75871225 | KD2-H4K8ac_peak_10036 | 6.0605   | PTPN9_ENSG00000169410                                                           |
| 15 | 75917064 | 75918029 | KD2-H4K8ac_peak_10037 | 23.27293 | SNUPN_ENSG00000169371;CTD-2026K11.3_ENSG00000260235                             |
| 15 | 75918278 | 75918764 | KD2-H4K8ac_peak_10038 | 7.76104  | SNUPN_ENSG00000169371                                                           |
| 15 | 75931993 | 75932486 | KD2-H4K8ac_peak_10039 | 9.96798  |                                                                                 |
| 15 | 75940250 | 75940891 | KD2-H4K8ac_peak_10040 | 5.9696   | IMP3_ENSG00000177971;SNX33_ENSG00000173548                                      |
| 15 | 75976569 | 75976774 | KD2-H4K8ac_peak_10041 | 7.52168  |                                                                                 |
| 15 | 75986098 | 75986689 | KD2-H4K8ac_peak_10042 | 7.76104  |                                                                                 |
| 15 | 75987340 | 75987776 | KD2-H4K8ac_peak_10043 | 5.72327  |                                                                                 |
| 15 | 75991934 | 75992487 | KD2-H4K8ac_peak_10044 | 11.89502 |                                                                                 |
| 15 | 75993255 | 75994017 | KD2-H4K8ac_peak_10045 | 9.96798  |                                                                                 |
| 15 | 75998417 | 75998770 | KD2-H4K8ac_peak_10046 | 5.61067  |                                                                                 |
| 15 | 76001610 | 76001988 | KD2-H4K8ac_peak_10047 | 7.47462  |                                                                                 |
| 15 | 76002502 | 76003073 | KD2-H4K8ac_peak_10048 | 8.30974  |                                                                                 |
| 15 | 76030643 | 76030880 | KD2-H4K8ac_peak_10049 | 8.10216  | DNM1P35_ENSG00000246877;RP11-24M17.4_ENSG00000260288;AC019294.1_ENSG00000256530 |
| 15 | 76031190 | 76031692 | KD2-H4K8ac_peak_10050 | 12.14909 | DNM1P35_ENSG00000246877;AC019294.1_ENSG00000256530                              |
| 15 | 76050635 | 76051437 | KD2-H4K8ac_peak_10051 | 9.63487  |                                                                                 |
| 15 | 76078748 | 76078993 | KD2-H4K8ac_peak_10052 | 6.65673  |                                                                                 |
| 15 | 76135074 | 76135440 | KD2-H4K8ac_peak_10053 | 14.8083  | UBE2Q2_ENSG00000140367                                                          |
| 15 | 76135993 | 76136582 | KD2-H4K8ac_peak_10054 | 11.04256 | UBE2Q2_ENSG00000140367                                                          |
| 15 | 76195729 | 76196623 | KD2-H4K8ac_peak_10055 | 20.30085 | FBXO22_ENSG00000167196                                                          |
| 15 | 76461155 | 76461523 | KD2-H4K8ac_peak_10056 | 7.27716  |                                                                                 |
| 15 | 76603402 | 76603647 | KD2-H4K8ac_peak_10057 | 6.55628  | ETFA_ENSG00000140374                                                            |
| 15 | 76628349 | 76628769 | KD2-H4K8ac_peak_10058 | 15.09202 | ISL2_ENSG00000159556                                                            |
| 15 | 77197311 | 77197673 | KD2-H4K8ac_peak_10059 | 9.95342  | SCAPER_ENSG00000140386                                                          |
| 15 | 77224186 | 77224602 | KD2-H4K8ac_peak_10060 | 5.14125  | RCN2_ENSG00000117906                                                            |
| 15 | 77286901 | 77287891 | KD2-H4K8ac_peak_10061 | 8.10216  |                                                                                 |
| 15 | 77328756 | 77329036 | KD2-H4K8ac_peak_10062 | 4.26087  |                                                                                 |
| 15 | 77362758 | 77363079 | KD2-H4K8ac_peak_10063 | 7.70289  |                                                                                 |
| 15 | 77713270 | 77713712 | KD2-H4K8ac_peak_10064 | 6.40297  | PEAK1_ENSG00000173517;HMG20A_ENSG00000140382                                    |
| 15 | 77788920 | 77789160 | KD2-H4K8ac_peak_10065 | 4.49837  |                                                                                 |
| 15 | 77789403 | 77789939 | KD2-H4K8ac_peak_10066 | 5.13615  |                                                                                 |
| 15 | 77790802 | 77791028 | KD2-H4K8ac_peak_10067 | 6.56926  |                                                                                 |
| 15 | 77821870 | 77822227 | KD2-H4K8ac_peak_10068 | 6.37852  |                                                                                 |
| 15 | 77835127 | 77836254 | KD2-H4K8ac_peak_10069 | 13.02811 |                                                                                 |
| 15 | 77861349 | 77861874 | KD2-H4K8ac_peak_10070 | 8.4627   | RP11-307C19.2_ENSG00000259420                                                   |
| 15 | 77869758 | 77870003 | KD2-H4K8ac_peak_10071 | 4.86324  |                                                                                 |
| 15 | 77895684 | 77896217 | KD2-H4K8ac_peak_10072 | 5.88845  |                                                                                 |

|    |          |          |                       |          |                                                        |
|----|----------|----------|-----------------------|----------|--------------------------------------------------------|
| 15 | 77896424 | 77896854 | KD2-H4K8ac_peak_10073 | 16.89856 |                                                        |
| 15 | 77897088 | 77898151 | KD2-H4K8ac_peak_10074 | 11.03331 |                                                        |
| 15 | 77898896 | 77899841 | KD2-H4K8ac_peak_10075 | 12.14909 |                                                        |
| 15 | 77900169 | 77900403 | KD2-H4K8ac_peak_10076 | 11.02863 |                                                        |
| 15 | 77900617 | 77900992 | KD2-H4K8ac_peak_10077 | 4.42765  |                                                        |
| 15 | 77925446 | 77925717 | KD2-H4K8ac_peak_10078 | 10.44656 |                                                        |
| 15 | 78031294 | 78031505 | KD2-H4K8ac_peak_10079 | 6.69204  |                                                        |
| 15 | 78175820 | 78176165 | KD2-H4K8ac_peak_10080 | 4.77079  |                                                        |
| 15 | 78179483 | 78179783 | KD2-H4K8ac_peak_10081 | 3.75035  |                                                        |
| 15 | 78181569 | 78181876 | KD2-H4K8ac_peak_10082 | 4.211    |                                                        |
| 15 | 78267292 | 78268712 | KD2-H4K8ac_peak_10083 | 8.53092  | ADAMTS7P3_ENSG00000261143                              |
| 15 | 78281150 | 78281661 | KD2-H4K8ac_peak_10084 | 7.51945  |                                                        |
| 15 | 78283137 | 78283778 | KD2-H4K8ac_peak_10085 | 8.10216  |                                                        |
| 15 | 78284553 | 78284837 | KD2-H4K8ac_peak_10086 | 8.79106  | RP11-114H24.6_ENSG00000259792                          |
| 15 | 78285893 | 78286920 | KD2-H4K8ac_peak_10087 | 15.69572 | RP11-114H24.6_ENSG00000259792                          |
| 15 | 78289296 | 78289640 | KD2-H4K8ac_peak_10088 | 7.13615  |                                                        |
| 15 | 78289920 | 78290907 | KD2-H4K8ac_peak_10089 | 8.59579  |                                                        |
| 15 | 78360963 | 78361179 | KD2-H4K8ac_peak_10090 | 4.01115  |                                                        |
| 15 | 78369497 | 78370358 | KD2-H4K8ac_peak_10091 | 12.84642 | TBC1D2B_ENSG00000167202;SH2D7_ENSG00000183476          |
| 15 | 78424025 | 78424411 | KD2-H4K8ac_peak_10092 | 7.38799  | CIB2_ENSG00000136425;IDH3A_ENSG00000166411             |
| 15 | 78592577 | 78593159 | KD2-H4K8ac_peak_10093 | 6.66692  | WDR61_ENSG00000140395                                  |
| 15 | 78601219 | 78601467 | KD2-H4K8ac_peak_10094 | 9.34989  |                                                        |
| 15 | 78607966 | 78608261 | KD2-H4K8ac_peak_10095 | 7.20567  |                                                        |
| 15 | 78608595 | 78609434 | KD2-H4K8ac_peak_10096 | 9.89383  |                                                        |
| 15 | 78614248 | 78615463 | KD2-H4K8ac_peak_10097 | 15.64162 |                                                        |
| 15 | 78623784 | 78624010 | KD2-H4K8ac_peak_10098 | 9.11818  |                                                        |
| 15 | 78684685 | 78684993 | KD2-H4K8ac_peak_10099 | 5.45396  |                                                        |
| 15 | 78729858 | 78730201 | KD2-H4K8ac_peak_10100 | 9.96798  | IREB2_ENSG00000136381                                  |
| 15 | 78730646 | 78731034 | KD2-H4K8ac_peak_10101 | 11.82518 | IREB2_ENSG00000136381                                  |
| 15 | 78831883 | 78832279 | KD2-H4K8ac_peak_10102 | 12.88108 | PSMA4_ENSG00000041357                                  |
| 15 | 78832487 | 78833147 | KD2-H4K8ac_peak_10103 | 10.21366 | PSMA4_ENSG00000041357                                  |
| 15 | 78909871 | 78910074 | KD2-H4K8ac_peak_10104 | 6.03353  |                                                        |
| 15 | 78910418 | 78910745 | KD2-H4K8ac_peak_10105 | 9.73431  |                                                        |
| 15 | 78911706 | 78913280 | KD2-H4K8ac_peak_10106 | 14.27217 | CHRNA3_ENSG00000080644                                 |
| 15 | 78913543 | 78913922 | KD2-H4K8ac_peak_10107 | 8.30974  | CHRNA3_ENSG00000080644                                 |
| 15 | 78917467 | 78917882 | KD2-H4K8ac_peak_10108 | 12.00273 | RP11-335K5.2_ENSG00000259555                           |
| 15 | 78918256 | 78918617 | KD2-H4K8ac_peak_10109 | 7.86151  | RP11-335K5.2_ENSG00000259555                           |
| 15 | 78930487 | 78930750 | KD2-H4K8ac_peak_10110 | 10.21366 |                                                        |
| 15 | 78931718 | 78932217 | KD2-H4K8ac_peak_10111 | 8.7325   |                                                        |
| 15 | 78932460 | 78933092 | KD2-H4K8ac_peak_10112 | 11.92978 |                                                        |
| 15 | 78933382 | 78934347 | KD2-H4K8ac_peak_10113 | 23.33626 |                                                        |
| 15 | 78953083 | 78953299 | KD2-H4K8ac_peak_10114 | 4.77079  | RP11-160C18.2_ENSG00000261303;RPL18P11_ENSG00000213307 |
| 15 | 78960324 | 78961147 | KD2-H4K8ac_peak_10115 | 5.30799  |                                                        |
| 15 | 78962010 | 78962287 | KD2-H4K8ac_peak_10116 | 7.82935  |                                                        |
| 15 | 78963266 | 78963548 | KD2-H4K8ac_peak_10117 | 9.1707   |                                                        |
| 15 | 78964820 | 78965411 | KD2-H4K8ac_peak_10118 | 24.30324 |                                                        |



|    |          |          |                       |          |                                                                                                   |
|----|----------|----------|-----------------------|----------|---------------------------------------------------------------------------------------------------|
| 15 | 78965680 | 78966659 | KD2-H4K8ac_peak_10119 | 18.37277 |                                                                                                   |
| 15 | 78967243 | 78967997 | KD2-H4K8ac_peak_10120 | 10.513   |                                                                                                   |
| 15 | 78968246 | 78968992 | KD2-H4K8ac_peak_10121 | 10.19949 |                                                                                                   |
| 15 | 78971414 | 78972213 | KD2-H4K8ac_peak_10122 | 13.58614 |                                                                                                   |
| 15 | 78972941 | 78973876 | KD2-H4K8ac_peak_10123 | 21.76228 |                                                                                                   |
| 15 | 78974663 | 78975147 | KD2-H4K8ac_peak_10124 | 5.30799  |                                                                                                   |
| 15 | 78975352 | 78976025 | KD2-H4K8ac_peak_10125 | 8.85813  |                                                                                                   |
| 15 | 78976266 | 78976534 | KD2-H4K8ac_peak_10126 | 4.35991  |                                                                                                   |
| 15 | 78977681 | 78979076 | KD2-H4K8ac_peak_10127 | 16.54162 |                                                                                                   |
| 15 | 78983415 | 78984285 | KD2-H4K8ac_peak_10128 | 8.00457  |                                                                                                   |
| 15 | 78986156 | 78986404 | KD2-H4K8ac_peak_10129 | 5.7068   |                                                                                                   |
| 15 | 78986978 | 78987218 | KD2-H4K8ac_peak_10130 | 4.75764  |                                                                                                   |
| 15 | 79001387 | 79001736 | KD2-H4K8ac_peak_10131 | 6.8836   |                                                                                                   |
| 15 | 79002014 | 79002538 | KD2-H4K8ac_peak_10132 | 6.65673  |                                                                                                   |
| 15 | 79029788 | 79030004 | KD2-H4K8ac_peak_10133 | 5.15777  |                                                                                                   |
| 15 | 79043683 | 79045388 | KD2-H4K8ac_peak_10134 | 12.84642 | RP11-160C18.4_ENSG00000238166                                                                     |
| 15 | 79046000 | 79047627 | KD2-H4K8ac_peak_10135 | 12.36441 |                                                                                                   |
| 15 | 79049233 | 79050148 | KD2-H4K8ac_peak_10136 | 13.70753 |                                                                                                   |
| 15 | 79050448 | 79051380 | KD2-H4K8ac_peak_10137 | 8.93761  |                                                                                                   |
| 15 | 79051634 | 79052559 | KD2-H4K8ac_peak_10138 | 19.16083 |                                                                                                   |
| 15 | 79052961 | 79053172 | KD2-H4K8ac_peak_10139 | 8.28234  |                                                                                                   |
| 15 | 79053422 | 79053991 | KD2-H4K8ac_peak_10140 | 6.40297  |                                                                                                   |
| 15 | 79055892 | 79056490 | KD2-H4K8ac_peak_10141 | 6.65673  |                                                                                                   |
| 15 | 79102423 | 79102855 | KD2-H4K8ac_peak_10142 | 3.90565  | ADAMTS7_ENSG00000136378;MORF4L1_ENSG00000185787                                                   |
| 15 | 79104013 | 79104676 | KD2-H4K8ac_peak_10143 | 16.61426 | ADAMTS7_ENSG00000136378                                                                           |
| 15 | 79164672 | 79164935 | KD2-H4K8ac_peak_10144 | 9.36516  |                                                                                                   |
| 15 | 79165371 | 79165695 | KD2-H4K8ac_peak_10145 | 14.8083  |                                                                                                   |
| 15 | 79222953 | 79223273 | KD2-H4K8ac_peak_10146 | 9.16531  |                                                                                                   |
| 15 | 79237021 | 79237357 | KD2-H4K8ac_peak_10147 | 8.28234  |                                                                                                   |
| 15 | 79288708 | 79288937 | KD2-H4K8ac_peak_10148 | 8.23274  |                                                                                                   |
| 15 | 79603065 | 79603271 | KD2-H4K8ac_peak_10149 | 7.13615  | TMED3_ENSG00000166557                                                                             |
| 15 | 79603504 | 79604088 | KD2-H4K8ac_peak_10150 | 15.61313 | TMED3_ENSG00000166557                                                                             |
| 15 | 80146446 | 80146796 | KD2-H4K8ac_peak_10151 | 5.30799  |                                                                                                   |
| 15 | 80188807 | 80189017 | KD2-H4K8ac_peak_10152 | 6.86699  | MTHFS_ENSG00000136371                                                                             |
| 15 | 80189285 | 80189610 | KD2-H4K8ac_peak_10153 | 5.75452  | MTHFS_ENSG00000136371                                                                             |
| 15 | 80215191 | 80215936 | KD2-H4K8ac_peak_10154 | 12.93209 | ST20-MTHFS_ENSG00000259332;ST20_ENSG00000180953;C15orf37_ENSG00000259642;C15ORF37_ENSG00000257028 |
| 15 | 80216422 | 80216832 | KD2-H4K8ac_peak_10155 | 5.71749  | ST20-MTHFS_ENSG00000259332;ST20_ENSG00000180953;C15ORF37_ENSG00000257028                          |
| 15 | 80352020 | 80352627 | KD2-H4K8ac_peak_10156 | 11.79585 | ZFAND6_ENSG00000086666                                                                            |
| 15 | 80695529 | 80697303 | KD2-H4K8ac_peak_10157 | 13.80019 | RP11-210M15.2_ENSG00000259495;ARNT2_ENSG00000172379                                               |
| 15 | 80986930 | 80987364 | KD2-H4K8ac_peak_10158 | 16.8435  | RP11-28H5.2_ENSG00000271983                                                                       |
| 15 | 80987672 | 80988458 | KD2-H4K8ac_peak_10159 | 11.60333 |                                                                                                   |
| 15 | 81292841 | 81294009 | KD2-H4K8ac_peak_10160 | 17.30994 | MESDC1_ENSG00000140406                                                                            |
| 15 | 81452611 | 81452863 | KD2-H4K8ac_peak_10161 | 4.67342  | IL16_ENSG00000172349                                                                              |
| 15 | 82042065 | 82042494 | KD2-H4K8ac_peak_10162 | 8.55271  |                                                                                                   |
| 15 | 82042803 | 82043099 | KD2-H4K8ac_peak_10163 | 4.211    |                                                                                                   |
| 15 | 82043670 | 82043872 | KD2-H4K8ac_peak_10164 | 6.90458  |                                                                                                   |

|    |          |          |                       |          |                                                         |
|----|----------|----------|-----------------------|----------|---------------------------------------------------------|
| 15 | 82045885 | 82046164 | KD2-H4K8ac_peak_10165 | 9.11031  |                                                         |
| 15 | 82201853 | 82202091 | KD2-H4K8ac_peak_10166 | 5.84991  |                                                         |
| 15 | 82206808 | 82207065 | KD2-H4K8ac_peak_10167 | 4.06758  |                                                         |
| 15 | 82337220 | 82337645 | KD2-H4K8ac_peak_10168 | 5.13893  | MEX3B_ENSG00000183496;AC026956.1_ENSG00000222521        |
| 15 | 82337917 | 82338355 | KD2-H4K8ac_peak_10169 | 7.6718   | MEX3B_ENSG00000183496                                   |
| 15 | 82338766 | 82339314 | KD2-H4K8ac_peak_10170 | 24.1491  | MEX3B_ENSG00000183496                                   |
| 15 | 82339766 | 82340387 | KD2-H4K8ac_peak_10171 | 9.63487  |                                                         |
| 15 | 82405090 | 82405330 | KD2-H4K8ac_peak_10172 | 9.81419  |                                                         |
| 15 | 82420751 | 82420952 | KD2-H4K8ac_peak_10173 | 5.54647  |                                                         |
| 15 | 82554773 | 82554990 | KD2-H4K8ac_peak_10174 | 9.20193  | EFTUD1_ENSG00000140598;FAM154B_ENSG00000188659          |
| 15 | 83240193 | 83240400 | KD2-H4K8ac_peak_10175 | 5.405    |                                                         |
| 15 | 83315878 | 83316905 | KD2-H4K8ac_peak_10176 | 13.51987 | CPEB1_ENSG00000214575;RP11-752G15.3_ENSG00000259462     |
| 15 | 83378838 | 83379399 | KD2-H4K8ac_peak_10177 | 4.67342  | AP3B2_ENSG00000103723                                   |
| 15 | 83418621 | 83419146 | KD2-H4K8ac_peak_10178 | 8.17902  | RP11-752G15.6_ENSG00000250988                           |
| 15 | 83477553 | 83477812 | KD2-H4K8ac_peak_10179 | 5.25071  | WHAMM_ENSG00000156232                                   |
| 15 | 83478415 | 83478838 | KD2-H4K8ac_peak_10180 | 5.72327  | WHAMM_ENSG00000156232                                   |
| 15 | 83519458 | 83519749 | KD2-H4K8ac_peak_10181 | 9.16531  |                                                         |
| 15 | 83620978 | 83621599 | KD2-H4K8ac_peak_10182 | 5.13615  |                                                         |
| 15 | 83654374 | 83655466 | KD2-H4K8ac_peak_10183 | 8.85813  | HOMER2_ENSG00000103942;FAM103A1_ENSG00000169612         |
| 15 | 83679900 | 83680317 | KD2-H4K8ac_peak_10184 | 8.58069  | C15orf40_ENSG00000169609                                |
| 15 | 83680554 | 83681160 | KD2-H4K8ac_peak_10185 | 9.65086  | C15orf40_ENSG00000169609;RP11-382A20.7_ENSG00000260608  |
| 15 | 83735568 | 83736657 | KD2-H4K8ac_peak_10186 | 15.25814 | BTBD1_ENSG00000064726;MIR4515_ENSG00000263643           |
| 15 | 83776213 | 83776440 | KD2-H4K8ac_peak_10187 | 4.66652  | TM6SF1_ENSG00000136404                                  |
| 15 | 83876001 | 83877248 | KD2-H4K8ac_peak_10188 | 19.33018 | HDGFRP3_ENSG00000166503                                 |
| 15 | 84748649 | 84749203 | KD2-H4K8ac_peak_10189 | 10.96455 | RP11-342A23.1_ENSG00000259609;EFTUD1P1_ENSG00000259404  |
| 15 | 84833325 | 84833619 | KD2-H4K8ac_peak_10190 | 8.02571  |                                                         |
| 15 | 84864638 | 84865055 | KD2-H4K8ac_peak_10191 | 7.59794  |                                                         |
| 15 | 84976278 | 84976550 | KD2-H4K8ac_peak_10192 | 20.91724 | UBE2Q2P11_ENSG00000259538;RP11-182J1.13_ENSG00000259774 |
| 15 | 85043464 | 85043686 | KD2-H4K8ac_peak_10193 | 11.30637 | UBE2Q2P12_ENSG00000197627;RP11-182J1.10_ENSG00000259551 |
| 15 | 85113060 | 85113980 | KD2-H4K8ac_peak_10194 | 8.55271  | LINC00933_ENSG00000259728;UBE2Q2P1_ENSG00000189136      |
| 15 | 85144308 | 85144733 | KD2-H4K8ac_peak_10195 | 10.43145 | ZSCAN2_ENSG00000176371                                  |
| 15 | 85174012 | 85174391 | KD2-H4K8ac_peak_10196 | 6.83936  | SCAND2P_ENSG00000176700                                 |
| 15 | 85197182 | 85197396 | KD2-H4K8ac_peak_10197 | 12.08081 | WDR73_ENSG00000177082                                   |
| 15 | 85197690 | 85197937 | KD2-H4K8ac_peak_10198 | 9.09777  | WDR73_ENSG00000177082                                   |
| 15 | 85201957 | 85202193 | KD2-H4K8ac_peak_10199 | 10.19949 | NMB_ENSG00000197696                                     |
| 15 | 85258729 | 85258936 | KD2-H4K8ac_peak_10200 | 5.08628  |                                                         |
| 15 | 85259478 | 85259696 | KD2-H4K8ac_peak_10201 | 11.05467 | SEC11A_ENSG00000140612                                  |
| 15 | 85259898 | 85260502 | KD2-H4K8ac_peak_10202 | 8.37043  | SEC11A_ENSG00000140612                                  |
| 15 | 85291020 | 85292433 | KD2-H4K8ac_peak_10203 | 16.29309 | ZNF592_ENSG00000166716                                  |
| 15 | 85470181 | 85470446 | KD2-H4K8ac_peak_10204 | 5.57044  |                                                         |
| 15 | 85498797 | 85499021 | KD2-H4K8ac_peak_10205 | 9.16531  |                                                         |
| 15 | 85523681 | 85524408 | KD2-H4K8ac_peak_10206 | 5.9696   | PDE8A_ENSG00000073417                                   |
| 15 | 85524704 | 85525216 | KD2-H4K8ac_peak_10207 | 12.00597 |                                                         |
| 15 | 85588599 | 85588820 | KD2-H4K8ac_peak_10208 | 4.37709  |                                                         |
| 15 | 85698763 | 85698992 | KD2-H4K8ac_peak_10209 | 9.15329  |                                                         |
| 15 | 85924257 | 85924617 | KD2-H4K8ac_peak_10210 | 13.34404 | AKAP13_ENSG00000170776                                  |

|    |          |          |                       |          |                                                         |
|----|----------|----------|-----------------------|----------|---------------------------------------------------------|
| 15 | 86158531 | 86158743 | KD2-H4K8ac_peak_10211 | 4.01115  |                                                         |
| 15 | 86163285 | 86163505 | KD2-H4K8ac_peak_10212 | 5.25071  |                                                         |
| 15 | 86323271 | 86323700 | KD2-H4K8ac_peak_10213 | 12.52363 |                                                         |
| 15 | 86329434 | 86329832 | KD2-H4K8ac_peak_10214 | 8.30974  |                                                         |
| 15 | 86374423 | 86374629 | KD2-H4K8ac_peak_10215 | 5.61067  |                                                         |
| 15 | 87114639 | 87114854 | KD2-H4K8ac_peak_10216 | 5.71749  |                                                         |
| 15 | 87115633 | 87115972 | KD2-H4K8ac_peak_10217 | 9.91109  |                                                         |
| 15 | 88266587 | 88267247 | KD2-H4K8ac_peak_10218 | 5.15777  |                                                         |
| 15 | 89089358 | 89090108 | KD2-H4K8ac_peak_10219 | 25.71759 | DET1_ENSG00000140543                                    |
| 15 | 89090437 | 89090805 | KD2-H4K8ac_peak_10220 | 7.12754  | DET1_ENSG00000140543                                    |
| 15 | 89114891 | 89115128 | KD2-H4K8ac_peak_10221 | 10.19949 |                                                         |
| 15 | 89115612 | 89115869 | KD2-H4K8ac_peak_10222 | 6.31143  |                                                         |
| 15 | 89164630 | 89164992 | KD2-H4K8ac_peak_10223 | 12.42761 | AEN_ENSG00000181026                                     |
| 15 | 89182124 | 89182583 | KD2-H4K8ac_peak_10224 | 7.27716  |                                                         |
| 15 | 89440992 | 89441229 | KD2-H4K8ac_peak_10225 | 8.98093  |                                                         |
| 15 | 89560575 | 89561193 | KD2-H4K8ac_peak_10226 | 10.86318 |                                                         |
| 15 | 89628908 | 89629266 | KD2-H4K8ac_peak_10227 | 4.67342  |                                                         |
| 15 | 89630728 | 89631224 | KD2-H4K8ac_peak_10228 | 12.00273 | RP11-326A19.3_ENSG00000261407;ABHD2_ENSG00000140526     |
| 15 | 89904942 | 89905162 | KD2-H4K8ac_peak_10229 | 6.25014  | LINC00925_ENSG00000255571                               |
| 15 | 89905786 | 89906026 | KD2-H4K8ac_peak_10230 | 9.34989  | LINC00925_ENSG00000255571                               |
| 15 | 89910390 | 89911494 | KD2-H4K8ac_peak_10231 | 7.07117  | MIR9-3_ENSG00000207819                                  |
| 15 | 89927716 | 89928000 | KD2-H4K8ac_peak_10232 | 5.18553  |                                                         |
| 15 | 89932492 | 89932959 | KD2-H4K8ac_peak_10233 | 11.92978 |                                                         |
| 15 | 89942559 | 89943929 | KD2-H4K8ac_peak_10234 | 14.68449 |                                                         |
| 15 | 89992556 | 89992814 | KD2-H4K8ac_peak_10235 | 3.86308  |                                                         |
| 15 | 90118855 | 90119265 | KD2-H4K8ac_peak_10236 | 8.84009  | TICRR_ENSG00000140534                                   |
| 15 | 90198378 | 90199050 | KD2-H4K8ac_peak_10237 | 7.40314  | KIF7_ENSG00000166813                                    |
| 15 | 90208696 | 90209637 | KD2-H4K8ac_peak_10238 | 10.72313 |                                                         |
| 15 | 90233816 | 90234340 | KD2-H4K8ac_peak_10239 | 12.99417 | PEX11A_ENSG00000166821;WDR93_ENSG00000140527            |
| 15 | 90293476 | 90294903 | KD2-H4K8ac_peak_10240 | 23.68358 | MESP1_ENSG00000166823;MRPL15P1_ENSG00000259441          |
| 15 | 90319027 | 90320775 | KD2-H4K8ac_peak_10241 | 15.96909 |                                                         |
| 15 | 90357681 | 90358375 | KD2-H4K8ac_peak_10242 | 6.66359  | ANPEP_ENSG00000166825                                   |
| 15 | 90358676 | 90358896 | KD2-H4K8ac_peak_10243 | 4.35724  | ANPEP_ENSG00000166825                                   |
| 15 | 90436986 | 90438085 | KD2-H4K8ac_peak_10244 | 11.05467 | AP3S2_ENSG00000157823                                   |
| 15 | 90456021 | 90457016 | KD2-H4K8ac_peak_10245 | 13.56049 | C15orf38-AP3S2_ENSG00000250021;C15orf38_ENSG00000242498 |
| 15 | 90506644 | 90506850 | KD2-H4K8ac_peak_10246 | 4.77079  |                                                         |
| 15 | 90543456 | 90544840 | KD2-H4K8ac_peak_10247 | 20.17674 | ZNF710_ENSG00000140548                                  |
| 15 | 90545221 | 90545492 | KD2-H4K8ac_peak_10248 | 8.41122  | ZNF710_ENSG00000140548                                  |
| 15 | 90645144 | 90645645 | KD2-H4K8ac_peak_10249 | 5.38581  | IDH2_ENSG00000182054;CTD-2315E11.1_ENSG00000259685      |
| 15 | 90701360 | 90702179 | KD2-H4K8ac_peak_10250 | 12.93209 |                                                         |
| 15 | 90717247 | 90717457 | KD2-H4K8ac_peak_10251 | 8.59579  |                                                         |
| 15 | 90718268 | 90718770 | KD2-H4K8ac_peak_10252 | 16.11042 |                                                         |
| 15 | 90719021 | 90719278 | KD2-H4K8ac_peak_10253 | 7.5554   |                                                         |
| 15 | 90724949 | 90725331 | KD2-H4K8ac_peak_10254 | 5.05318  |                                                         |
| 15 | 90734876 | 90735746 | KD2-H4K8ac_peak_10255 | 11.1952  |                                                         |
| 15 | 90736263 | 90736516 | KD2-H4K8ac_peak_10256 | 9.68068  |                                                         |

|    |          |          |                       |          |                                                    |
|----|----------|----------|-----------------------|----------|----------------------------------------------------|
| 15 | 90744165 | 90744894 | KD2-H4K8ac_peak_10257 | 7.36799  |                                                    |
| 15 | 90777467 | 90777665 | KD2-H4K8ac_peak_10258 | 11.33854 | CIB1_ENSG00000185043;GDPGP1_ENSG00000183208        |
| 15 | 90808721 | 90809134 | KD2-H4K8ac_peak_10259 | 10.78621 | NGRN_ENSG00000182768                               |
| 15 | 90863521 | 90863722 | KD2-H4K8ac_peak_10260 | 7.36799  |                                                    |
| 15 | 90894777 | 90895289 | KD2-H4K8ac_peak_10261 | 13.02811 | ZNF774_ENSG00000196391                             |
| 15 | 90895567 | 90895764 | KD2-H4K8ac_peak_10262 | 7.07117  | ZNF774_ENSG00000196391                             |
| 15 | 90930922 | 90931168 | KD2-H4K8ac_peak_10263 | 11.05467 | IQGAP1_ENSG00000140575                             |
| 15 | 91065236 | 91065449 | KD2-H4K8ac_peak_10264 | 5.88845  |                                                    |
| 15 | 91072087 | 91073408 | KD2-H4K8ac_peak_10265 | 13.3695  | CRTC3_ENSG00000140577                              |
| 15 | 91208319 | 91209414 | KD2-H4K8ac_peak_10266 | 24.93342 |                                                    |
| 15 | 91259988 | 91260227 | KD2-H4K8ac_peak_10267 | 6.0073   | RP11-387D10.2_ENSG00000259736;BLM_ENSG00000197299  |
| 15 | 91384309 | 91384518 | KD2-H4K8ac_peak_10268 | 5.40356  |                                                    |
| 15 | 91414270 | 91414658 | KD2-H4K8ac_peak_10269 | 11.03331 |                                                    |
| 15 | 91438221 | 91439588 | KD2-H4K8ac_peak_10270 | 8.4716   |                                                    |
| 15 | 91445613 | 91445849 | KD2-H4K8ac_peak_10271 | 10.05606 | MAN2A2_ENSG00000196547                             |
| 15 | 91446157 | 91446715 | KD2-H4K8ac_peak_10272 | 6.0605   | MAN2A2_ENSG00000196547                             |
| 15 | 91473469 | 91473788 | KD2-H4K8ac_peak_10273 | 10.05606 | UNC45A_ENSG00000140553                             |
| 15 | 91475226 | 91475752 | KD2-H4K8ac_peak_10274 | 12.57865 | HDDC3_ENSG00000184508                              |
| 15 | 91498193 | 91498821 | KD2-H4K8ac_peak_10275 | 8.53092  | AC068831.6_ENSG00000258384;RCCD1_ENSG00000166965   |
| 15 | 91499389 | 91499754 | KD2-H4K8ac_peak_10276 | 5.88845  | AC068831.6_ENSG00000258384                         |
| 15 | 91500001 | 91500644 | KD2-H4K8ac_peak_10277 | 11.76021 |                                                    |
| 15 | 91537514 | 91537725 | KD2-H4K8ac_peak_10278 | 8.65175  |                                                    |
| 15 | 91565424 | 91565747 | KD2-H4K8ac_peak_10279 | 6.99815  | VPS33B_ENSG00000184056;AC068831.10_ENSG00000214432 |
| 15 | 91566591 | 91566840 | KD2-H4K8ac_peak_10280 | 6.25869  | VPS33B_ENSG00000184056;AC068831.10_ENSG00000214432 |
| 15 | 92396580 | 92397430 | KD2-H4K8ac_peak_10281 | 9.73431  | SLCO3A1_ENSG00000176463                            |
| 15 | 92493454 | 92493683 | KD2-H4K8ac_peak_10282 | 4.01115  |                                                    |
| 15 | 92936695 | 92936911 | KD2-H4K8ac_peak_10283 | 6.2781   | ST8SIA2_ENSG00000140557                            |
| 15 | 92937367 | 92937677 | KD2-H4K8ac_peak_10284 | 6.36375  | ST8SIA2_ENSG00000140557                            |
| 15 | 92937963 | 92938565 | KD2-H4K8ac_peak_10285 | 9.95119  | ST8SIA2_ENSG00000140557                            |
| 15 | 93042458 | 93043084 | KD2-H4K8ac_peak_10286 | 7.70289  |                                                    |
| 15 | 93064805 | 93065042 | KD2-H4K8ac_peak_10287 | 5.25071  |                                                    |
| 15 | 93177900 | 93178166 | KD2-H4K8ac_peak_10288 | 5.61377  |                                                    |
| 15 | 93198823 | 93199235 | KD2-H4K8ac_peak_10289 | 6.66692  |                                                    |
| 15 | 93257505 | 93258109 | KD2-H4K8ac_peak_10290 | 9.1707   |                                                    |
| 15 | 93277031 | 93277353 | KD2-H4K8ac_peak_10291 | 8.55271  | RP11-386M24.4_ENSG00000258741                      |
| 15 | 93363270 | 93363514 | KD2-H4K8ac_peak_10292 | 7.22457  |                                                    |
| 15 | 93364212 | 93364497 | KD2-H4K8ac_peak_10293 | 6.85193  |                                                    |
| 15 | 93366128 | 93366499 | KD2-H4K8ac_peak_10294 | 4.42765  |                                                    |
| 15 | 93375660 | 93375994 | KD2-H4K8ac_peak_10295 | 6.25869  |                                                    |
| 15 | 93377109 | 93377420 | KD2-H4K8ac_peak_10296 | 6.16888  |                                                    |
| 15 | 93413444 | 93413706 | KD2-H4K8ac_peak_10297 | 8.17902  |                                                    |
| 15 | 93425307 | 93425509 | KD2-H4K8ac_peak_10298 | 4.77079  | AC013394.2_ENSG00000272888                         |
| 15 | 93426093 | 93426666 | KD2-H4K8ac_peak_10299 | 15.59774 | AC013394.2_ENSG00000272888;CHD2_ENSG00000173575    |
| 15 | 93460446 | 93460656 | KD2-H4K8ac_peak_10300 | 7.12754  |                                                    |
| 15 | 93615803 | 93616173 | KD2-H4K8ac_peak_10301 | 8.79106  |                                                    |
| 15 | 94404437 | 94404676 | KD2-H4K8ac_peak_10302 | 6.66692  |                                                    |

|    |           |          |                       |          |                                                       |
|----|-----------|----------|-----------------------|----------|-------------------------------------------------------|
| 15 | 94774834  | 94775034 | KD2-H4K8ac_peak_10303 | 5.51783  | MCTP2_ENSG00000140563                                 |
| 15 | 96883969  | 96884290 | KD2-H4K8ac_peak_10304 | 10.05606 |                                                       |
| 15 | 97121938  | 97122206 | KD2-H4K8ac_peak_10305 | 4.37708  |                                                       |
| 15 | 99190698  | 99191266 | KD2-H4K8ac_peak_10306 | 8.4716   | RP11-35O15.1_ENSG00000259424;IGF1R_ENSG00000140443    |
| 15 | 99191809  | 99192011 | KD2-H4K8ac_peak_10307 | 6.85103  | IGF1R_ENSG00000140443                                 |
| 15 | 99192292  | 99192706 | KD2-H4K8ac_peak_10308 | 12.00273 | IGF1R_ENSG00000140443                                 |
| 15 | 99192933  | 99193288 | KD2-H4K8ac_peak_10309 | 9.20193  | IGF1R_ENSG00000140443                                 |
| 15 | 99193505  | 99193980 | KD2-H4K8ac_peak_10310 | 5.13615  |                                                       |
| 15 | 99250798  | 99250999 | KD2-H4K8ac_peak_10311 | 5.6755   |                                                       |
| 15 | 99270825  | 99271112 | KD2-H4K8ac_peak_10312 | 8.53092  |                                                       |
| 15 | 99278109  | 99278750 | KD2-H4K8ac_peak_10313 | 8.30974  |                                                       |
| 15 | 99279683  | 99280248 | KD2-H4K8ac_peak_10314 | 11.59946 |                                                       |
| 15 | 99280451  | 99280659 | KD2-H4K8ac_peak_10315 | 5.73839  |                                                       |
| 15 | 99281006  | 99281217 | KD2-H4K8ac_peak_10316 | 9.1707   |                                                       |
| 15 | 99287811  | 99288176 | KD2-H4K8ac_peak_10317 | 6.31143  |                                                       |
| 15 | 99341516  | 99341825 | KD2-H4K8ac_peak_10318 | 4.11746  |                                                       |
| 15 | 99557880  | 99559141 | KD2-H4K8ac_peak_10319 | 7.36799  |                                                       |
| 15 | 99602400  | 99603068 | KD2-H4K8ac_peak_10320 | 29.60293 |                                                       |
| 15 | 99619644  | 99619986 | KD2-H4K8ac_peak_10321 | 7.13615  |                                                       |
| 15 | 99640566  | 99640828 | KD2-H4K8ac_peak_10322 | 3.97079  |                                                       |
| 15 | 99645529  | 99645723 | KD2-H4K8ac_peak_10323 | 4.7158   | RP11-654A16.3_ENSG00000259475                         |
| 15 | 99663566  | 99663900 | KD2-H4K8ac_peak_10324 | 12.99417 |                                                       |
| 15 | 99664309  | 99664651 | KD2-H4K8ac_peak_10325 | 7.98621  |                                                       |
| 15 | 99665096  | 99665801 | KD2-H4K8ac_peak_10326 | 8.94469  |                                                       |
| 15 | 99791743  | 99792058 | KD2-H4K8ac_peak_10327 | 12.06346 | TTC23_ENSG00000103852;LRRC28_ENSG00000168904          |
| 15 | 99942815  | 99943084 | KD2-H4K8ac_peak_10328 | 5.22731  |                                                       |
| 15 | 99943342  | 99943539 | KD2-H4K8ac_peak_10329 | 8.1233   |                                                       |
| 15 | 100026500 | 1E+08    | KD2-H4K8ac_peak_10330 | 10.30284 |                                                       |
| 15 | 100105290 | 1E+08    | KD2-H4K8ac_peak_10331 | 13.70753 |                                                       |
| 15 | 100273320 | 1E+08    | KD2-H4K8ac_peak_10332 | 14.98671 | LYSMD4_ENSG00000183060                                |
| 15 | 100273898 | 1E+08    | KD2-H4K8ac_peak_10333 | 9.36516  | LYSMD4_ENSG00000183060                                |
| 15 | 100347410 | 1E+08    | KD2-H4K8ac_peak_10334 | 5.57044  | DNM1P46_ENSG00000182397;CTD-2054N24.2_ENSG00000259363 |
| 15 | 100537536 | 1.01E+08 | KD2-H4K8ac_peak_10335 | 7.47462  |                                                       |
| 15 | 100735200 | 1.01E+08 | KD2-H4K8ac_peak_10336 | 4.44527  |                                                       |
| 15 | 100742663 | 1.01E+08 | KD2-H4K8ac_peak_10337 | 8.01894  |                                                       |
| 15 | 100874783 | 1.01E+08 | KD2-H4K8ac_peak_10338 | 7.5554   |                                                       |
| 15 | 100875327 | 1.01E+08 | KD2-H4K8ac_peak_10339 | 5.9696   |                                                       |
| 15 | 100890077 | 1.01E+08 | KD2-H4K8ac_peak_10340 | 10.29842 | SPATA41_ENSG00000189419                               |
| 15 | 100913591 | 1.01E+08 | KD2-H4K8ac_peak_10341 | 3.75035  | RP11-168G16.2_ENSG00000259430                         |
| 15 | 101142120 | 1.01E+08 | KD2-H4K8ac_peak_10342 | 13.56049 | ASB7_ENSG00000183475                                  |
| 15 | 101142817 | 1.01E+08 | KD2-H4K8ac_peak_10343 | 13.81781 | LINS_ENSG00000140471;ASB7_ENSG00000183475             |
| 15 | 101198701 | 1.01E+08 | KD2-H4K8ac_peak_10344 | 5.15777  |                                                       |
| 15 | 101203117 | 1.01E+08 | KD2-H4K8ac_peak_10345 | 8.45238  |                                                       |
| 15 | 101208117 | 1.01E+08 | KD2-H4K8ac_peak_10346 | 12.30969 |                                                       |
| 15 | 101209634 | 1.01E+08 | KD2-H4K8ac_peak_10347 | 8.30974  |                                                       |
| 15 | 101210853 | 1.01E+08 | KD2-H4K8ac_peak_10348 | 4.06758  |                                                       |

|    |           |          |                       |          |                                                      |
|----|-----------|----------|-----------------------|----------|------------------------------------------------------|
| 15 | 101303481 | 1.01E+08 | KD2-H4K8ac_peak_10349 | 8.30974  |                                                      |
| 15 | 101305375 | 1.01E+08 | KD2-H4K8ac_peak_10350 | 6.8713   |                                                      |
| 15 | 101306009 | 1.01E+08 | KD2-H4K8ac_peak_10351 | 18.24798 |                                                      |
| 15 | 101307682 | 1.01E+08 | KD2-H4K8ac_peak_10352 | 9.33795  |                                                      |
| 15 | 101308527 | 1.01E+08 | KD2-H4K8ac_peak_10353 | 8.56219  |                                                      |
| 15 | 101309732 | 1.01E+08 | KD2-H4K8ac_peak_10354 | 11.89502 |                                                      |
| 15 | 101310607 | 1.01E+08 | KD2-H4K8ac_peak_10355 | 5.66317  |                                                      |
| 15 | 101311274 | 1.01E+08 | KD2-H4K8ac_peak_10356 | 14.56955 |                                                      |
| 15 | 101312465 | 1.01E+08 | KD2-H4K8ac_peak_10357 | 8.23062  |                                                      |
| 15 | 101314164 | 1.01E+08 | KD2-H4K8ac_peak_10358 | 12.84642 |                                                      |
| 15 | 101320721 | 1.01E+08 | KD2-H4K8ac_peak_10359 | 8.16906  |                                                      |
| 15 | 101322108 | 1.01E+08 | KD2-H4K8ac_peak_10360 | 12.00597 |                                                      |
| 15 | 101322653 | 1.01E+08 | KD2-H4K8ac_peak_10361 | 6.99815  |                                                      |
| 15 | 101370477 | 1.01E+08 | KD2-H4K8ac_peak_10362 | 11.05407 |                                                      |
| 15 | 101371944 | 1.01E+08 | KD2-H4K8ac_peak_10363 | 12.25733 |                                                      |
| 15 | 101418601 | 1.01E+08 | KD2-H4K8ac_peak_10364 | 28.21903 | ALDH1A3_ENSG00000184254                              |
| 15 | 101420629 | 1.01E+08 | KD2-H4K8ac_peak_10365 | 10.0692  |                                                      |
| 15 | 101437406 | 1.01E+08 | KD2-H4K8ac_peak_10366 | 6.2781   |                                                      |
| 15 | 101438305 | 1.01E+08 | KD2-H4K8ac_peak_10367 | 5.51783  |                                                      |
| 15 | 101440963 | 1.01E+08 | KD2-H4K8ac_peak_10368 | 7.98621  |                                                      |
| 15 | 101458551 | 1.01E+08 | KD2-H4K8ac_peak_10369 | 8.4716   | RP11-66B24.4_ENSG00000259583;LRRK1_ENSG00000154237   |
| 15 | 101459207 | 1.01E+08 | KD2-H4K8ac_peak_10370 | 9.24683  | RP11-66B24.4_ENSG00000259583;LRRK1_ENSG00000154237   |
| 15 | 101459733 | 1.01E+08 | KD2-H4K8ac_peak_10371 | 10.43145 | RP11-66B24.4_ENSG00000259583;LRRK1_ENSG00000154237   |
| 15 | 101484445 | 1.01E+08 | KD2-H4K8ac_peak_10372 | 4.01115  |                                                      |
| 15 | 101653618 | 1.02E+08 | KD2-H4K8ac_peak_10373 | 5.21139  |                                                      |
| 15 | 101656139 | 1.02E+08 | KD2-H4K8ac_peak_10374 | 7.40111  | RP11-424I19.1_ENSG00000259365                        |
| 15 | 101661035 | 1.02E+08 | KD2-H4K8ac_peak_10375 | 5.4779   |                                                      |
| 15 | 101662488 | 1.02E+08 | KD2-H4K8ac_peak_10376 | 7.40314  |                                                      |
| 15 | 101666007 | 1.02E+08 | KD2-H4K8ac_peak_10377 | 18.21424 |                                                      |
| 15 | 101666739 | 1.02E+08 | KD2-H4K8ac_peak_10378 | 14.8083  |                                                      |
| 15 | 101668050 | 1.02E+08 | KD2-H4K8ac_peak_10379 | 9.1707   |                                                      |
| 15 | 101669367 | 1.02E+08 | KD2-H4K8ac_peak_10380 | 6.40683  |                                                      |
| 15 | 101673728 | 1.02E+08 | KD2-H4K8ac_peak_10381 | 5.71749  |                                                      |
| 15 | 101677591 | 1.02E+08 | KD2-H4K8ac_peak_10382 | 4.42765  |                                                      |
| 15 | 101678293 | 1.02E+08 | KD2-H4K8ac_peak_10383 | 13.09607 |                                                      |
| 15 | 101683221 | 1.02E+08 | KD2-H4K8ac_peak_10384 | 5.14125  |                                                      |
| 15 | 101688525 | 1.02E+08 | KD2-H4K8ac_peak_10385 | 29.18655 |                                                      |
| 15 | 101689893 | 1.02E+08 | KD2-H4K8ac_peak_10386 | 9.96941  |                                                      |
| 15 | 101703405 | 1.02E+08 | KD2-H4K8ac_peak_10387 | 6.56211  |                                                      |
| 15 | 101791296 | 1.02E+08 | KD2-H4K8ac_peak_10388 | 10.87093 | CHSY1_ENSG00000131873                                |
| 15 | 101791937 | 1.02E+08 | KD2-H4K8ac_peak_10389 | 4.80593  | CHSY1_ENSG00000131873                                |
| 15 | 101792372 | 1.02E+08 | KD2-H4K8ac_peak_10390 | 10.96455 | CHSY1_ENSG00000131873                                |
| 15 | 101835753 | 1.02E+08 | KD2-H4K8ac_peak_10391 | 7.40111  | SNRPA1_ENSG00000131876;RP11-299G20.2_ENSG00000259172 |
| 15 | 101918837 | 1.02E+08 | KD2-H4K8ac_peak_10392 | 5.1313   |                                                      |
| 15 | 101989884 | 1.02E+08 | KD2-H4K8ac_peak_10393 | 3.7063   |                                                      |
| 15 | 101990338 | 1.02E+08 | KD2-H4K8ac_peak_10394 | 6.84261  |                                                      |

|    |           |          |                       |          |                                                |
|----|-----------|----------|-----------------------|----------|------------------------------------------------|
| 15 | 101990761 | 1.02E+08 | KD2-H4K8ac_peak_10395 | 9.95119  |                                                |
| 15 | 101991460 | 1.02E+08 | KD2-H4K8ac_peak_10396 | 4.91516  |                                                |
| 15 | 101993413 | 1.02E+08 | KD2-H4K8ac_peak_10397 | 7.73418  |                                                |
| 15 | 102009705 | 1.02E+08 | KD2-H4K8ac_peak_10398 | 8.17902  |                                                |
| 15 | 102028949 | 1.02E+08 | KD2-H4K8ac_peak_10399 | 4.86824  |                                                |
| 15 | 102029978 | 1.02E+08 | KD2-H4K8ac_peak_10400 | 8.17902  |                                                |
| 15 | 102042030 | 1.02E+08 | KD2-H4K8ac_peak_10401 | 10.58496 |                                                |
| 15 | 102152999 | 1.02E+08 | KD2-H4K8ac_peak_10402 | 6.66692  |                                                |
| 15 | 102154046 | 1.02E+08 | KD2-H4K8ac_peak_10403 | 7.07117  |                                                |
| 15 | 102159199 | 1.02E+08 | KD2-H4K8ac_peak_10404 | 8.94469  |                                                |
| 15 | 102192234 | 1.02E+08 | KD2-H4K8ac_peak_10405 | 5.30799  | TM2D3_ENSG00000184277                          |
| 15 | 102192734 | 1.02E+08 | KD2-H4K8ac_peak_10406 | 10.01546 | TM2D3_ENSG00000184277                          |
| 15 | 102285471 | 1.02E+08 | KD2-H4K8ac_peak_10407 | 8.1233   | RP11-89K11.1_ENSG00000259658                   |
| 15 | 102286542 | 1.02E+08 | KD2-H4K8ac_peak_10408 | 5.57044  | RP11-89K11.1_ENSG00000259658                   |
| 16 | 103357    | 103557   | KD2-H4K8ac_peak_10409 | 9.96798  | POLR3K_ENSG00000161980;SNRNP25_ENSG00000161981 |
| 16 | 103930    | 104176   | KD2-H4K8ac_peak_10410 | 13.12288 | POLR3K_ENSG00000161980;SNRNP25_ENSG00000161981 |
| 16 | 122100    | 122364   | KD2-H4K8ac_peak_10411 | 8.59301  |                                                |
| 16 | 127219    | 128149   | KD2-H4K8ac_peak_10412 | 30.13194 | RHBDF1_ENSG00000007384;MPG_ENSG00000103152     |
| 16 | 188070    | 188324   | KD2-H4K8ac_peak_10413 | 11.05407 | NPRL3_ENSG00000103148                          |
| 16 | 188828    | 189242   | KD2-H4K8ac_peak_10414 | 8.74596  | NPRL3_ENSG00000103148                          |
| 16 | 278836    | 279763   | KD2-H4K8ac_peak_10415 | 22.65017 | LUC7L_ENSG00000007392                          |
| 16 | 283624    | 283909   | KD2-H4K8ac_peak_10416 | 6.36319  | ITFG3_ENSG00000167930                          |
| 16 | 284282    | 284683   | KD2-H4K8ac_peak_10417 | 13.6756  | ITFG3_ENSG00000167930                          |
| 16 | 284926    | 285208   | KD2-H4K8ac_peak_10418 | 7.76329  | ITFG3_ENSG00000167930                          |
| 16 | 324986    | 325568   | KD2-H4K8ac_peak_10419 | 9.51688  | RGS11_ENSG00000076344                          |
| 16 | 325883    | 326554   | KD2-H4K8ac_peak_10420 | 9.31907  | RGS11_ENSG00000076344                          |
| 16 | 329964    | 330393   | KD2-H4K8ac_peak_10421 | 9.57101  |                                                |
| 16 | 330714    | 331444   | KD2-H4K8ac_peak_10422 | 18.80827 |                                                |
| 16 | 401902    | 402656   | KD2-H4K8ac_peak_10423 | 6.51023  | AXIN1_ENSG00000103126                          |
| 16 | 420893    | 421264   | KD2-H4K8ac_peak_10424 | 5.54647  | MRPL28_ENSG00000086504                         |
| 16 | 431507    | 431774   | KD2-H4K8ac_peak_10425 | 8.85813  | Z97634.3_ENSG00000236829                       |
| 16 | 432155    | 432602   | KD2-H4K8ac_peak_10426 | 16.23676 | Z97634.3_ENSG00000236829                       |
| 16 | 446656    | 446997   | KD2-H4K8ac_peak_10427 | 12.42761 | NME4_ENSG00000103202                           |
| 16 | 447388    | 447597   | KD2-H4K8ac_peak_10428 | 5.4779   | NME4_ENSG00000103202                           |
| 16 | 451983    | 452523   | KD2-H4K8ac_peak_10429 | 8.30974  | DECR2_ENSG00000242612                          |
| 16 | 474774    | 475451   | KD2-H4K8ac_peak_10430 | 9.89126  | RAB11FIP3_ENSG00000090565                      |
| 16 | 475695    | 476125   | KD2-H4K8ac_peak_10431 | 10.53596 | RAB11FIP3_ENSG00000090565                      |
| 16 | 576664    | 577863   | KD2-H4K8ac_peak_10432 | 10.19949 | CAPN15_ENSG00000103326                         |
| 16 | 578175    | 578688   | KD2-H4K8ac_peak_10433 | 7.47462  | CAPN15_ENSG00000103326                         |
| 16 | 615033    | 616065   | KD2-H4K8ac_peak_10434 | 11.8457  | PIGQ_ENSG00000007541;NHLRC4_ENSG00000257108    |
| 16 | 616395    | 616912   | KD2-H4K8ac_peak_10435 | 8.74082  | PIGQ_ENSG00000007541;NHLRC4_ENSG00000257108    |
| 16 | 617414    | 617615   | KD2-H4K8ac_peak_10436 | 4.70564  | PIGQ_ENSG00000007541;NHLRC4_ENSG00000257108    |
| 16 | 619307    | 619861   | KD2-H4K8ac_peak_10437 | 8.86099  |                                                |
| 16 | 638707    | 639771   | KD2-H4K8ac_peak_10438 | 12.14909 | RAB40C_ENSG00000197562                         |
| 16 | 679216    | 679820   | KD2-H4K8ac_peak_10439 | 5.14125  | WFIKKN1_ENSG00000127578                        |
| 16 | 681232    | 681599   | KD2-H4K8ac_peak_10440 | 6.92624  |                                                |

|    |         |         |                       |          |                                                       |
|----|---------|---------|-----------------------|----------|-------------------------------------------------------|
| 16 | 685962  | 686218  | KD2-H4K8ac_peak_10441 | 7.47462  | C16orf13_ENSG00000130731                              |
| 16 | 686460  | 687032  | KD2-H4K8ac_peak_10442 | 13.67958 | C16orf13_ENSG00000130731                              |
| 16 | 687400  | 687973  | KD2-H4K8ac_peak_10443 | 7.36799  |                                                       |
| 16 | 698391  | 698641  | KD2-H4K8ac_peak_10444 | 6.16747  | AL022341.3_ENSG00000228201;WDR90_ENSG00000161996      |
| 16 | 698841  | 699224  | KD2-H4K8ac_peak_10445 | 9.34989  | AL022341.3_ENSG00000228201;WDR90_ENSG00000161996      |
| 16 | 699525  | 699881  | KD2-H4K8ac_peak_10446 | 5.30799  | AL022341.3_ENSG00000228201;WDR90_ENSG00000161996      |
| 16 | 709808  | 710630  | KD2-H4K8ac_peak_10447 | 9.57101  |                                                       |
| 16 | 711245  | 711643  | KD2-H4K8ac_peak_10448 | 5.70596  |                                                       |
| 16 | 717394  | 717651  | KD2-H4K8ac_peak_10449 | 8.55271  | RHOT2_ENSG00000140983                                 |
| 16 | 718154  | 718687  | KD2-H4K8ac_peak_10450 | 10.33736 | RHOT2_ENSG00000140983                                 |
| 16 | 725514  | 725862  | KD2-H4K8ac_peak_10451 | 7.36799  | RHBDL1_ENSG00000103269                                |
| 16 | 726145  | 726383  | KD2-H4K8ac_peak_10452 | 5.00593  | RHBDL1_ENSG00000103269                                |
| 16 | 730104  | 730583  | KD2-H4K8ac_peak_10453 | 12.82393 | LA16c-313D11.9_ENSG00000260394;STUB1_ENSG00000103266  |
| 16 | 734026  | 734257  | KD2-H4K8ac_peak_10454 | 9.18237  | JMJD8_ENSG00000161999                                 |
| 16 | 739894  | 741044  | KD2-H4K8ac_peak_10455 | 7.07117  | WDR24_ENSG00000127580;LA16c-313D11.12_ENSG00000261659 |
| 16 | 759990  | 760338  | KD2-H4K8ac_peak_10456 | 8.80397  | LA16c-380A1.1_ENSG00000259840                         |
| 16 | 760637  | 760914  | KD2-H4K8ac_peak_10457 | 5.56396  | LA16c-380A1.1_ENSG00000259840                         |
| 16 | 766205  | 766465  | KD2-H4K8ac_peak_10458 | 4.06758  |                                                       |
| 16 | 770640  | 771374  | KD2-H4K8ac_peak_10459 | 17.83665 | FAM173A_ENSG00000103254                               |
| 16 | 771676  | 771907  | KD2-H4K8ac_peak_10460 | 5.84991  |                                                       |
| 16 | 776535  | 776895  | KD2-H4K8ac_peak_10461 | 11.24702 | CCDC78_ENSG00000162004;HAGHL_ENSG00000103253          |
| 16 | 777776  | 778106  | KD2-H4K8ac_peak_10462 | 7.40314  | CCDC78_ENSG00000162004;HAGHL_ENSG00000103253          |
| 16 | 778529  | 778851  | KD2-H4K8ac_peak_10463 | 14.38358 |                                                       |
| 16 | 779088  | 779302  | KD2-H4K8ac_peak_10464 | 5.11586  |                                                       |
| 16 | 781417  | 781669  | KD2-H4K8ac_peak_10465 | 5.57044  |                                                       |
| 16 | 790575  | 790974  | KD2-H4K8ac_peak_10466 | 8.04448  | NARFL_ENSG00000103245                                 |
| 16 | 791185  | 791752  | KD2-H4K8ac_peak_10467 | 11.24702 | NARFL_ENSG00000103245                                 |
| 16 | 838036  | 838319  | KD2-H4K8ac_peak_10468 | 12.99417 | RPUSD1_ENSG00000007376;CHTF18_ENSG00000127586         |
| 16 | 838734  | 839060  | KD2-H4K8ac_peak_10469 | 7.36799  | RPUSD1_ENSG00000007376;CHTF18_ENSG00000127586         |
| 16 | 857152  | 857781  | KD2-H4K8ac_peak_10470 | 27.2501  |                                                       |
| 16 | 857981  | 858272  | KD2-H4K8ac_peak_10471 | 11.33854 |                                                       |
| 16 | 936190  | 936455  | KD2-H4K8ac_peak_10472 | 4.211    |                                                       |
| 16 | 1020347 | 1020880 | KD2-H4K8ac_peak_10473 | 26.3019  |                                                       |
| 16 | 1358654 | 1358882 | KD2-H4K8ac_peak_10474 | 10.96455 |                                                       |
| 16 | 1359186 | 1359466 | KD2-H4K8ac_peak_10475 | 5.85291  |                                                       |
| 16 | 1359683 | 1360080 | KD2-H4K8ac_peak_10476 | 8.28234  |                                                       |
| 16 | 1401305 | 1402320 | KD2-H4K8ac_peak_10477 | 11.89502 | TSR3_ENSG00000007520;GNPTG_ENSG00000090581            |
| 16 | 1429358 | 1429592 | KD2-H4K8ac_peak_10478 | 10.73134 | AL031721.1_ENSG00000265529                            |
| 16 | 1429886 | 1430132 | KD2-H4K8ac_peak_10479 | 7.47462  | AL031721.1_ENSG00000265529                            |
| 16 | 1464015 | 1464547 | KD2-H4K8ac_peak_10480 | 12.63341 | UNKL_ENSG00000059145                                  |
| 16 | 1470337 | 1470684 | KD2-H4K8ac_peak_10481 | 10.24981 |                                                       |
| 16 | 1471023 | 1471672 | KD2-H4K8ac_peak_10482 | 8.30974  |                                                       |
| 16 | 1475645 | 1475870 | KD2-H4K8ac_peak_10483 | 3.87922  |                                                       |
| 16 | 1480179 | 1481456 | KD2-H4K8ac_peak_10484 | 12.57143 | C16orf91_ENSG00000174109                              |
| 16 | 1524512 | 1526007 | KD2-H4K8ac_peak_10485 | 30.32576 | CLCN7_ENSG00000103249                                 |
| 16 | 1580457 | 1581105 | KD2-H4K8ac_peak_10486 | 7.36799  |                                                       |



|    |         |         |                       |          |                                                                       |
|----|---------|---------|-----------------------|----------|-----------------------------------------------------------------------|
| 16 | 1581472 | 1581820 | KD2-H4K8ac_peak_10487 | 7.11824  |                                                                       |
| 16 | 1660066 | 1660672 | KD2-H4K8ac_peak_10488 | 11.3394  |                                                                       |
| 16 | 1660934 | 1661284 | KD2-H4K8ac_peak_10489 | 7.76329  | IFT140_ENSG00000187535                                                |
| 16 | 1664710 | 1665135 | KD2-H4K8ac_peak_10490 | 14.8083  |                                                                       |
| 16 | 1727278 | 1728017 | KD2-H4K8ac_peak_10491 | 6.15357  | HN1L_ENSG00000206053                                                  |
| 16 | 1728444 | 1728720 | KD2-H4K8ac_peak_10492 | 13.36684 | HN1L_ENSG00000206053                                                  |
| 16 | 1820736 | 1821685 | KD2-H4K8ac_peak_10493 | 15.04266 | NME3_ENSG00000103024                                                  |
| 16 | 1822532 | 1823850 | KD2-H4K8ac_peak_10494 | 21.12734 | NME3_ENSG00000103024;MRPS34_ENSG00000074071;EME2_ENSG00000197774      |
| 16 | 1831974 | 1832360 | KD2-H4K8ac_peak_10495 | 8.59579  | NUBP2_ENSG00000095906                                                 |
| 16 | 1833030 | 1833276 | KD2-H4K8ac_peak_10496 | 5.01002  | NUBP2_ENSG00000095906                                                 |
| 16 | 1876231 | 1876457 | KD2-H4K8ac_peak_10497 | 7.47462  | HAGH_ENSG00000063854;FAHD1_ENSG00000180185                            |
| 16 | 1876978 | 1877692 | KD2-H4K8ac_peak_10498 | 13.80019 | HAGH_ENSG00000063854;FAHD1_ENSG00000180185                            |
| 16 | 1922423 | 1922729 | KD2-H4K8ac_peak_10499 | 5.45396  |                                                                       |
| 16 | 1954070 | 1954469 | KD2-H4K8ac_peak_10500 | 9.63487  |                                                                       |
| 16 | 1958462 | 1958751 | KD2-H4K8ac_peak_10501 | 6.2781   |                                                                       |
| 16 | 1959410 | 1959859 | KD2-H4K8ac_peak_10502 | 6.25869  |                                                                       |
| 16 | 1960117 | 1960605 | KD2-H4K8ac_peak_10503 | 4.92711  |                                                                       |
| 16 | 1979372 | 1979744 | KD2-H4K8ac_peak_10504 | 5.9696   |                                                                       |
| 16 | 1979954 | 1980246 | KD2-H4K8ac_peak_10505 | 9.95119  |                                                                       |
| 16 | 1982081 | 1982919 | KD2-H4K8ac_peak_10506 | 8.55271  |                                                                       |
| 16 | 1992824 | 1993084 | KD2-H4K8ac_peak_10507 | 5.75757  | MSRB1_ENSG00000198736                                                 |
| 16 | 1993532 | 1994236 | KD2-H4K8ac_peak_10508 | 9.20388  | MSRB1_ENSG00000198736                                                 |
| 16 | 2008657 | 2009196 | KD2-H4K8ac_peak_10509 | 9.63487  | NDUFB10_ENSG00000140990                                               |
| 16 | 2009600 | 2009941 | KD2-H4K8ac_peak_10510 | 11.24702 | NDUFB10_ENSG00000140990                                               |
| 16 | 2014418 | 2014772 | KD2-H4K8ac_peak_10511 | 8.85813  | AC005363.9_ENSG00000255513;RPS2_ENSG00000140988;SNHG9_ENSG00000255198 |
| 16 | 2015096 | 2015453 | KD2-H4K8ac_peak_10512 | 10.08707 | RPS2_ENSG00000140988;SNHG9_ENSG00000255198                            |
| 16 | 2021407 | 2021852 | KD2-H4K8ac_peak_10513 | 6.67092  | TBL3_ENSG00000183751                                                  |
| 16 | 2022110 | 2022507 | KD2-H4K8ac_peak_10514 | 11.24702 | TBL3_ENSG00000183751                                                  |
| 16 | 2033469 | 2033925 | KD2-H4K8ac_peak_10515 | 6.04107  | NOXO1_ENSG00000196408;GFER_ENSG00000127554                            |
| 16 | 2034264 | 2034854 | KD2-H4K8ac_peak_10516 | 10.87093 | NOXO1_ENSG00000196408;GFER_ENSG00000127554                            |
| 16 | 2039665 | 2040926 | KD2-H4K8ac_peak_10517 | 8.28234  | AC005606.14_ENSG00000261790;SYNGR3_ENSG00000127561                    |
| 16 | 2059269 | 2059597 | KD2-H4K8ac_peak_10518 | 18.11402 | ZNF598_ENSG00000167962;NPW_ENSG00000183971                            |
| 16 | 2059916 | 2060825 | KD2-H4K8ac_peak_10519 | 13.87397 | ZNF598_ENSG00000167962;NPW_ENSG00000183971                            |
| 16 | 2073475 | 2073831 | KD2-H4K8ac_peak_10520 | 9.63487  |                                                                       |
| 16 | 2083866 | 2084291 | KD2-H4K8ac_peak_10521 | 8.66368  |                                                                       |
| 16 | 2086170 | 2086611 | KD2-H4K8ac_peak_10522 | 7.07117  |                                                                       |
| 16 | 2087912 | 2088283 | KD2-H4K8ac_peak_10523 | 7.47462  |                                                                       |
| 16 | 2088555 | 2089477 | KD2-H4K8ac_peak_10524 | 10.86378 |                                                                       |
| 16 | 2089881 | 2090490 | KD2-H4K8ac_peak_10525 | 9.08816  |                                                                       |
| 16 | 2097573 | 2097825 | KD2-H4K8ac_peak_10526 | 13.73635 | NTHL1_ENSG00000065057;TSC2_ENSG00000103197                            |
| 16 | 2098020 | 2098621 | KD2-H4K8ac_peak_10527 | 9.51625  | NTHL1_ENSG00000065057;TSC2_ENSG00000103197                            |
| 16 | 2171842 | 2172042 | KD2-H4K8ac_peak_10528 | 7.34308  |                                                                       |
| 16 | 2172336 | 2173505 | KD2-H4K8ac_peak_10529 | 15.40852 |                                                                       |
| 16 | 2173732 | 2175023 | KD2-H4K8ac_peak_10530 | 33.7704  |                                                                       |
| 16 | 2175361 | 2176384 | KD2-H4K8ac_peak_10531 | 15.20126 |                                                                       |
| 16 | 2178358 | 2179009 | KD2-H4K8ac_peak_10532 | 9.94337  |                                                                       |

|    |         |         |                       |          |                                                                             |
|----|---------|---------|-----------------------|----------|-----------------------------------------------------------------------------|
| 16 | 2198260 | 2198476 | KD2-H4K8ac_peak_10533 | 7.74292  |                                                                             |
| 16 | 2199685 | 2199961 | KD2-H4K8ac_peak_10534 | 4.86324  |                                                                             |
| 16 | 2205840 | 2206211 | KD2-H4K8ac_peak_10535 | 4.60576  | RP11-304L19.5_ENSG00000260260;SNORD60_ENSG00000206630;TRAF7_ENSG00000131653 |
| 16 | 2245532 | 2245781 | KD2-H4K8ac_peak_10536 | 6.33462  | CASKIN1_ENSG00000167971                                                     |
| 16 | 2246263 | 2246496 | KD2-H4K8ac_peak_10537 | 4.211    | CASKIN1_ENSG00000167971                                                     |
| 16 | 2254892 | 2255647 | KD2-H4K8ac_peak_10538 | 11.24702 | MLST8_ENSG00000167965;AC009065.3_ENSG00000252958                            |
| 16 | 2265230 | 2265449 | KD2-H4K8ac_peak_10539 | 8.30974  | PGP_ENSG00000184207                                                         |
| 16 | 2265753 | 2266179 | KD2-H4K8ac_peak_10540 | 14.48084 | PGP_ENSG00000184207                                                         |
| 16 | 2273676 | 2274279 | KD2-H4K8ac_peak_10541 | 17.94825 | E4F1_ENSG00000167967                                                        |
| 16 | 2301350 | 2301542 | KD2-H4K8ac_peak_10542 | 10.77651 | ECI1_ENSG00000167969                                                        |
| 16 | 2317546 | 2318648 | KD2-H4K8ac_peak_10543 | 13.59098 | RNPS1_ENSG00000205937;AC009065.2_ENSG00000207715;MIR940_ENSG00000260778     |
| 16 | 2389894 | 2390516 | KD2-H4K8ac_peak_10544 | 4.84794  | ABCA3_ENSG00000167972;ABCA17P_ENSG00000238098                               |
| 16 | 2391145 | 2391357 | KD2-H4K8ac_peak_10545 | 10.65724 | ABCA3_ENSG00000167972                                                       |
| 16 | 2417854 | 2418054 | KD2-H4K8ac_peak_10546 | 7.27716  |                                                                             |
| 16 | 2478351 | 2479093 | KD2-H4K8ac_peak_10547 | 11.92978 | CCNF_ENSG00000162063                                                        |
| 16 | 2479482 | 2479702 | KD2-H4K8ac_peak_10548 | 9.81419  | CCNF_ENSG00000162063                                                        |
| 16 | 2510514 | 2510712 | KD2-H4K8ac_peak_10549 | 5.29555  | RP11-715J22.4_ENSG00000260874;C16orf59_ENSG00000162062                      |
| 16 | 2517147 | 2519332 | KD2-H4K8ac_peak_10550 | 19.33018 | RP11-715J22.2_ENSG00000259895                                               |
| 16 | 2519579 | 2519964 | KD2-H4K8ac_peak_10551 | 6.16883  |                                                                             |
| 16 | 2520206 | 2520413 | KD2-H4K8ac_peak_10552 | 5.64429  |                                                                             |
| 16 | 2521333 | 2522362 | KD2-H4K8ac_peak_10553 | 10.43145 | NTN3_ENSG00000162068                                                        |
| 16 | 2523779 | 2524388 | KD2-H4K8ac_peak_10554 | 8.86099  | TBC1D24_ENSG00000162065                                                     |
| 16 | 2532290 | 2532496 | KD2-H4K8ac_peak_10555 | 6.85193  |                                                                             |
| 16 | 2533157 | 2533695 | KD2-H4K8ac_peak_10556 | 5.20998  |                                                                             |
| 16 | 2562801 | 2563080 | KD2-H4K8ac_peak_10557 | 6.56211  | ATP6V0C_ENSG00000185883;ATP6C_ENSG00000259784                               |
| 16 | 2563311 | 2563859 | KD2-H4K8ac_peak_10558 | 12.08081 | ATP6V0C_ENSG00000185883;ATP6C_ENSG00000259784                               |
| 16 | 2564182 | 2564404 | KD2-H4K8ac_peak_10559 | 5.51783  | ATP6V0C_ENSG00000185883;ATP6C_ENSG00000259784                               |
| 16 | 2581554 | 2581919 | KD2-H4K8ac_peak_10560 | 14.12454 | CEMP1_ENSG00000205923;MIR3178_ENSG00000266232                               |
| 16 | 2582725 | 2583115 | KD2-H4K8ac_peak_10561 | 10.70006 | MIR3178_ENSG00000266232                                                     |
| 16 | 2653445 | 2654017 | KD2-H4K8ac_peak_10562 | 4.86324  | AC141586.5_ENSG00000215154                                                  |
| 16 | 2723136 | 2723380 | KD2-H4K8ac_peak_10563 | 11.97761 | ERVK13-1_ENSG00000260565                                                    |
| 16 | 2731542 | 2732318 | KD2-H4K8ac_peak_10564 | 10.0692  | KCTD5_ENSG00000167977                                                       |
| 16 | 2732592 | 2733016 | KD2-H4K8ac_peak_10565 | 12.00273 | KCTD5_ENSG00000167977                                                       |
| 16 | 2769415 | 2770072 | KD2-H4K8ac_peak_10566 | 8.23274  | PRSS27_ENSG00000172382                                                      |
| 16 | 2770396 | 2771302 | KD2-H4K8ac_peak_10567 | 9.63487  | PRSS27_ENSG00000172382                                                      |
| 16 | 2771607 | 2771939 | KD2-H4K8ac_peak_10568 | 11.05407 |                                                                             |
| 16 | 2801785 | 2802487 | KD2-H4K8ac_peak_10569 | 20.90514 | SRRM2-AS1_ENSG00000205913;SRRM2_ENSG00000167978                             |
| 16 | 2802730 | 2802938 | KD2-H4K8ac_peak_10570 | 11.89502 | SRRM2-AS1_ENSG00000205913;SRRM2_ENSG00000167978                             |
| 16 | 2803170 | 2803409 | KD2-H4K8ac_peak_10571 | 7.19807  | SRRM2-AS1_ENSG00000205913;SRRM2_ENSG00000167978                             |
| 16 | 2826787 | 2827158 | KD2-H4K8ac_peak_10572 | 16.07006 | TCEB2_ENSG00000103363                                                       |
| 16 | 2827369 | 2828236 | KD2-H4K8ac_peak_10573 | 18.94636 | TCEB2_ENSG00000103363                                                       |
| 16 | 2848486 | 2848684 | KD2-H4K8ac_peak_10574 | 7.01658  | PRSS41_ENSG00000215148                                                      |
| 16 | 2902307 | 2902721 | KD2-H4K8ac_peak_10575 | 14.22723 |                                                                             |
| 16 | 2917881 | 2918759 | KD2-H4K8ac_peak_10576 | 13.80019 | LA16c-325D7.2_ENSG00000263280                                               |
| 16 | 2933310 | 2933521 | KD2-H4K8ac_peak_10577 | 15.13261 | FLYWCH2_ENSG00000162076                                                     |
| 16 | 2953871 | 2954191 | KD2-H4K8ac_peak_10578 | 5.54647  |                                                                             |

|    |         |         |                       |          |                                               |
|----|---------|---------|-----------------------|----------|-----------------------------------------------|
| 16 | 2954659 | 2955330 | KD2-H4K8ac_peak_10579 | 8.5092   |                                               |
| 16 | 2962130 | 2962379 | KD2-H4K8ac_peak_10580 | 14.48084 | FLYWCHI_ENSG00000059122                       |
| 16 | 3013652 | 3014375 | KD2-H4K8ac_peak_10581 | 12.82393 | KREMEN2_ENSG00000131650                       |
| 16 | 3018650 | 3019021 | KD2-H4K8ac_peak_10582 | 9.59905  | PAQR4_ENSG00000162073                         |
| 16 | 3029949 | 3030450 | KD2-H4K8ac_peak_10583 | 15.40367 | PKMYT1_ENSG00000127564                        |
| 16 | 3030655 | 3031585 | KD2-H4K8ac_peak_10584 | 20.30085 | PKMYT1_ENSG00000127564                        |
| 16 | 3033556 | 3033765 | KD2-H4K8ac_peak_10585 | 15.43566 |                                               |
| 16 | 3053449 | 3053811 | KD2-H4K8ac_peak_10586 | 8.82366  |                                               |
| 16 | 3073721 | 3074253 | KD2-H4K8ac_peak_10587 | 12.47554 | HCFC1R1_ENSG00000103145;THOC6_ENSG00000131652 |
| 16 | 3109053 | 3110144 | KD2-H4K8ac_peak_10588 | 33.81493 | RP11-473M20.7_ENSG00000261971                 |
| 16 | 3155463 | 3156538 | KD2-H4K8ac_peak_10589 | 18.54875 | RP11-473M20.11_ENSG00000263011                |
| 16 | 3161981 | 3163107 | KD2-H4K8ac_peak_10590 | 16.49944 | ZNF205_ENSG00000122386                        |
| 16 | 3173892 | 3174160 | KD2-H4K8ac_peak_10591 | 6.90231  |                                               |
| 16 | 3175078 | 3175384 | KD2-H4K8ac_peak_10592 | 4.75875  |                                               |
| 16 | 3185163 | 3185430 | KD2-H4K8ac_peak_10593 | 12.74171 | RP11-473M20.14_ENSG00000263072                |
| 16 | 3199957 | 3200364 | KD2-H4K8ac_peak_10594 | 6.65673  |                                               |
| 16 | 3239252 | 3239551 | KD2-H4K8ac_peak_10595 | 6.20982  |                                               |
| 16 | 3314078 | 3314431 | KD2-H4K8ac_peak_10596 | 8.85813  | ZNF263_ENSG00000006194                        |
| 16 | 3331846 | 3332086 | KD2-H4K8ac_peak_10597 | 4.77079  |                                               |
| 16 | 3332591 | 3333241 | KD2-H4K8ac_peak_10598 | 9.63487  |                                               |
| 16 | 3333633 | 3334015 | KD2-H4K8ac_peak_10599 | 5.9696   |                                               |
| 16 | 3354840 | 3356153 | KD2-H4K8ac_peak_10600 | 9.63487  | TIGD7_ENSG00000140993;ZNF75A_ENSG00000162086  |
| 16 | 3481656 | 3482102 | KD2-H4K8ac_peak_10601 | 4.86824  |                                               |
| 16 | 3493810 | 3494097 | KD2-H4K8ac_peak_10602 | 7.27716  | ZNF597_ENSG00000167981;NAA60_ENSG00000122390  |
| 16 | 3507577 | 3508599 | KD2-H4K8ac_peak_10603 | 28.28058 | LA16c-306E5.3_ENSG00000263212                 |
| 16 | 3661266 | 3661507 | KD2-H4K8ac_peak_10604 | 9.71513  | SLX4_ENSG00000188827;DNASE1_ENSG00000213918   |
| 16 | 3661826 | 3662122 | KD2-H4K8ac_peak_10605 | 11.92978 | SLX4_ENSG00000188827;DNASE1_ENSG00000213918   |
| 16 | 3767061 | 3767914 | KD2-H4K8ac_peak_10606 | 16.25886 | TRAP1_ENSG00000126602                         |
| 16 | 3930210 | 3930437 | KD2-H4K8ac_peak_10607 | 8.30974  | CREBBP_ENSG00000005339                        |
| 16 | 3930911 | 3931548 | KD2-H4K8ac_peak_10608 | 18.54875 | CREBBP_ENSG00000005339                        |
| 16 | 4097880 | 4098083 | KD2-H4K8ac_peak_10609 | 7.05051  |                                               |
| 16 | 4098554 | 4098931 | KD2-H4K8ac_peak_10610 | 3.75035  |                                               |
| 16 | 4165848 | 4166342 | KD2-H4K8ac_peak_10611 | 5.88562  | ADCY9_ENSG00000162104                         |
| 16 | 4166702 | 4167173 | KD2-H4K8ac_peak_10612 | 15.58442 | ADCY9_ENSG00000162104                         |
| 16 | 4233415 | 4233755 | KD2-H4K8ac_peak_10613 | 13.12288 | RP11-95P2.3_ENSG00000263105                   |
| 16 | 4234253 | 4234622 | KD2-H4K8ac_peak_10614 | 6.20982  | RP11-95P2.3_ENSG00000263105                   |
| 16 | 4250161 | 4250372 | KD2-H4K8ac_peak_10615 | 7.27716  |                                               |
| 16 | 4313966 | 4314282 | KD2-H4K8ac_peak_10616 | 12.23    |                                               |
| 16 | 4321327 | 4321866 | KD2-H4K8ac_peak_10617 | 12.93209 |                                               |
| 16 | 4322117 | 4322634 | KD2-H4K8ac_peak_10618 | 10.96455 | TFAP4_ENSG00000090447                         |
| 16 | 4323544 | 4323874 | KD2-H4K8ac_peak_10619 | 10.17341 | TFAP4_ENSG00000090447                         |
| 16 | 4356606 | 4357535 | KD2-H4K8ac_peak_10620 | 8.79106  |                                               |
| 16 | 4357827 | 4358425 | KD2-H4K8ac_peak_10621 | 13.9234  |                                               |
| 16 | 4364517 | 4365923 | KD2-H4K8ac_peak_10622 | 10.05606 |                                               |
| 16 | 4366241 | 4366458 | KD2-H4K8ac_peak_10623 | 4.54006  |                                               |
| 16 | 4377319 | 4377720 | KD2-H4K8ac_peak_10624 | 11.89502 | AC005356.1_ENSG00000262686                    |

|    |         |         |                       |          |                                                     |
|----|---------|---------|-----------------------|----------|-----------------------------------------------------|
| 16 | 4378030 | 4378851 | KD2-H4K8ac_peak_10625 | 13.81781 | AC005356.1_ENSG00000262686                          |
| 16 | 4421871 | 4422210 | KD2-H4K8ac_peak_10626 | 7.93362  | VASN_ENSG00000168140                                |
| 16 | 4433784 | 4434913 | KD2-H4K8ac_peak_10627 | 10.19949 |                                                     |
| 16 | 4441474 | 4441950 | KD2-H4K8ac_peak_10628 | 9.09777  |                                                     |
| 16 | 4442179 | 4444103 | KD2-H4K8ac_peak_10629 | 22.21705 |                                                     |
| 16 | 4444992 | 4445303 | KD2-H4K8ac_peak_10630 | 5.80191  |                                                     |
| 16 | 4466110 | 4466524 | KD2-H4K8ac_peak_10631 | 11.33751 |                                                     |
| 16 | 4474992 | 4475752 | KD2-H4K8ac_peak_10632 | 6.20982  | CORO7_ENSG00000262246;DNAJA3_ENSG00000103423        |
| 16 | 4476175 | 4476380 | KD2-H4K8ac_peak_10633 | 5.82799  | CORO7_ENSG00000262246;DNAJA3_ENSG00000103423        |
| 16 | 4524025 | 4524471 | KD2-H4K8ac_peak_10634 | 7.07117  | HMOX2_ENSG00000103415                               |
| 16 | 4524972 | 4525269 | KD2-H4K8ac_peak_10635 | 6.97919  | HMOX2_ENSG00000103415                               |
| 16 | 4526511 | 4526770 | KD2-H4K8ac_peak_10636 | 6.36375  |                                                     |
| 16 | 4587537 | 4588387 | KD2-H4K8ac_peak_10637 | 10.44656 | CDIP1_ENSG00000089486                               |
| 16 | 4588976 | 4589353 | KD2-H4K8ac_peak_10638 | 6.66692  | CDIP1_ENSG00000089486                               |
| 16 | 4664671 | 4666154 | KD2-H4K8ac_peak_10639 | 14.4458  | UBALD1_ENSG00000153443;MGRN1_ENSG00000102858        |
| 16 | 4666610 | 4666984 | KD2-H4K8ac_peak_10640 | 7.96322  | MGRN1_ENSG00000102858                               |
| 16 | 4674357 | 4674597 | KD2-H4K8ac_peak_10641 | 5.13615  |                                                     |
| 16 | 4675035 | 4675455 | KD2-H4K8ac_peak_10642 | 10.53377 |                                                     |
| 16 | 4732842 | 4733070 | KD2-H4K8ac_peak_10643 | 6.66692  |                                                     |
| 16 | 4783834 | 4784042 | KD2-H4K8ac_peak_10644 | 9.06369  | ANKS3_ENSG00000168096;C16orf71_ENSG00000166246      |
| 16 | 4817427 | 4818048 | KD2-H4K8ac_peak_10645 | 6.2781   | ZNF500_ENSG00000103199                              |
| 16 | 4821120 | 4821525 | KD2-H4K8ac_peak_10646 | 5.15777  |                                                     |
| 16 | 4822136 | 4822770 | KD2-H4K8ac_peak_10647 | 7.27716  |                                                     |
| 16 | 4852317 | 4852942 | KD2-H4K8ac_peak_10648 | 8.55271  | ROGDI_ENSG00000067836                               |
| 16 | 4897002 | 4897233 | KD2-H4K8ac_peak_10649 | 7.38799  | UBN1_ENSG00000118900                                |
| 16 | 4993291 | 4993709 | KD2-H4K8ac_peak_10650 | 6.30229  |                                                     |
| 16 | 5083186 | 5083908 | KD2-H4K8ac_peak_10651 | 10.53377 | NAGPA_ENSG00000103174;ALG1_ENSG00000033011          |
| 16 | 5121882 | 5122165 | KD2-H4K8ac_peak_10652 | 12.93253 |                                                     |
| 16 | 5147359 | 5147687 | KD2-H4K8ac_peak_10653 | 13.56049 | FAM86A_ENSG00000118894                              |
| 16 | 5148608 | 5148897 | KD2-H4K8ac_peak_10654 | 8.10216  | FAM86A_ENSG00000118894;RP11-10K17.6_ENSG00000267070 |
| 16 | 5552179 | 5552483 | KD2-H4K8ac_peak_10655 | 8.52559  |                                                     |
| 16 | 5553025 | 5553753 | KD2-H4K8ac_peak_10656 | 7.70289  |                                                     |
| 16 | 5554814 | 5555379 | KD2-H4K8ac_peak_10657 | 4.67342  |                                                     |
| 16 | 5912874 | 5913118 | KD2-H4K8ac_peak_10658 | 10.46264 |                                                     |
| 16 | 8714864 | 8715136 | KD2-H4K8ac_peak_10659 | 6.14257  | METTL22_ENSG00000067365                             |
| 16 | 8715614 | 8715816 | KD2-H4K8ac_peak_10660 | 8.10216  | METTL22_ENSG00000067365                             |
| 16 | 8767940 | 8768217 | KD2-H4K8ac_peak_10661 | 6.65673  | ABAT_ENSG00000183044                                |
| 16 | 8806882 | 8807087 | KD2-H4K8ac_peak_10662 | 8.6308   |                                                     |
| 16 | 8891214 | 8891423 | KD2-H4K8ac_peak_10663 | 10.17698 | TMEM186_ENSG00000184857                             |
| 16 | 8891732 | 8892183 | KD2-H4K8ac_peak_10664 | 7.47462  | TMEM186_ENSG00000184857                             |
| 16 | 8918942 | 8919199 | KD2-H4K8ac_peak_10665 | 9.27888  |                                                     |
| 16 | 8962542 | 8962806 | KD2-H4K8ac_peak_10666 | 5.59859  | RP11-77H9.6_ENSG00000261481;CARHSP1_ENSG00000153048 |
| 16 | 8963470 | 8963775 | KD2-H4K8ac_peak_10667 | 9.36516  | RP11-77H9.6_ENSG00000261481;CARHSP1_ENSG00000153048 |
| 16 | 8974021 | 8974216 | KD2-H4K8ac_peak_10668 | 8.59579  |                                                     |
| 16 | 9058010 | 9058204 | KD2-H4K8ac_peak_10669 | 7.95563  | USP7_ENSG00000187555                                |
| 16 | 9107026 | 9107223 | KD2-H4K8ac_peak_10670 | 5.14125  |                                                     |

|    |          |          |                       |          |                                                    |
|----|----------|----------|-----------------------|----------|----------------------------------------------------|
| 16 | 9146646  | 9147079  | KD2-H4K8ac_peak_10671 | 10.05606 |                                                    |
| 16 | 9147472  | 9147674  | KD2-H4K8ac_peak_10672 | 5.57044  |                                                    |
| 16 | 9183832  | 9184621  | KD2-H4K8ac_peak_10673 | 16.57619 | C16orf72_ENSG00000182831                           |
| 16 | 9185628  | 9186603  | KD2-H4K8ac_peak_10674 | 12.93209 | C16orf72_ENSG00000182831                           |
| 16 | 9504989  | 9505197  | KD2-H4K8ac_peak_10675 | 6.03693  |                                                    |
| 16 | 9505420  | 9505707  | KD2-H4K8ac_peak_10676 | 6.90458  |                                                    |
| 16 | 10480057 | 10480265 | KD2-H4K8ac_peak_10677 | 10.0692  |                                                    |
| 16 | 10671327 | 10671667 | KD2-H4K8ac_peak_10678 | 9.02573  | RP11-27M24.2_ENSG00000260310                       |
| 16 | 10672247 | 10672961 | KD2-H4K8ac_peak_10679 | 7.22457  | RP11-27M24.2_ENSG00000260310                       |
| 16 | 10673686 | 10674122 | KD2-H4K8ac_peak_10680 | 5.30799  | EMP2_ENSG00000213853                               |
| 16 | 10674762 | 10674963 | KD2-H4K8ac_peak_10681 | 4.54006  | EMP2_ENSG00000213853                               |
| 16 | 10707928 | 10708125 | KD2-H4K8ac_peak_10682 | 6.06203  |                                                    |
| 16 | 10710502 | 10711174 | KD2-H4K8ac_peak_10683 | 16.61426 |                                                    |
| 16 | 10711387 | 10711856 | KD2-H4K8ac_peak_10684 | 5.14125  |                                                    |
| 16 | 10713153 | 10713505 | KD2-H4K8ac_peak_10685 | 10.43145 |                                                    |
| 16 | 10835230 | 10835479 | KD2-H4K8ac_peak_10686 | 8.17902  |                                                    |
| 16 | 10837130 | 10837431 | KD2-H4K8ac_peak_10687 | 6.06203  | NUBP1_ENSG00000103274                              |
| 16 | 10837668 | 10837923 | KD2-H4K8ac_peak_10688 | 15.47237 | NUBP1_ENSG00000103274                              |
| 16 | 10912234 | 10912958 | KD2-H4K8ac_peak_10689 | 19.93588 | TVP23A_ENSG00000166676                             |
| 16 | 10921810 | 10922168 | KD2-H4K8ac_peak_10690 | 4.211    |                                                    |
| 16 | 10922905 | 10923200 | KD2-H4K8ac_peak_10691 | 4.84794  |                                                    |
| 16 | 11012327 | 11012559 | KD2-H4K8ac_peak_10692 | 5.54647  |                                                    |
| 16 | 11035974 | 11036253 | KD2-H4K8ac_peak_10693 | 9.20193  | DEXI_ENSG00000182108                               |
| 16 | 11038501 | 11038788 | KD2-H4K8ac_peak_10694 | 6.0605   | CLEC16A_ENSG00000038532                            |
| 16 | 11223848 | 11224256 | KD2-H4K8ac_peak_10695 | 4.211    |                                                    |
| 16 | 11349763 | 11349978 | KD2-H4K8ac_peak_10696 | 9.96798  | SOCS1_ENSG00000185338                              |
| 16 | 11350206 | 11350543 | KD2-H4K8ac_peak_10697 | 11.79585 | SOCS1_ENSG00000185338                              |
| 16 | 11391632 | 11391957 | KD2-H4K8ac_peak_10698 | 11.92978 |                                                    |
| 16 | 11397553 | 11398258 | KD2-H4K8ac_peak_10699 | 13.39763 |                                                    |
| 16 | 11490367 | 11490777 | KD2-H4K8ac_peak_10700 | 8.10216  |                                                    |
| 16 | 11588440 | 11589012 | KD2-H4K8ac_peak_10701 | 11.05407 |                                                    |
| 16 | 11589297 | 11589540 | KD2-H4K8ac_peak_10702 | 10.0746  |                                                    |
| 16 | 11590095 | 11590658 | KD2-H4K8ac_peak_10703 | 8.1331   |                                                    |
| 16 | 11590876 | 11591704 | KD2-H4K8ac_peak_10704 | 17.64174 |                                                    |
| 16 | 11592071 | 11592311 | KD2-H4K8ac_peak_10705 | 9.11031  |                                                    |
| 16 | 11680152 | 11681293 | KD2-H4K8ac_peak_10706 | 19.42408 |                                                    |
| 16 | 11761855 | 11762073 | KD2-H4K8ac_peak_10707 | 7.76104  | SNN_ENSG00000184602                                |
| 16 | 11837035 | 11837264 | KD2-H4K8ac_peak_10708 | 8.23274  | TXNDC11_ENSG00000153066                            |
| 16 | 11890701 | 11891068 | KD2-H4K8ac_peak_10709 | 8.85813  | ZC3H7A_ENSG00000122299                             |
| 16 | 11891452 | 11891996 | KD2-H4K8ac_peak_10710 | 6.25869  | ZC3H7A_ENSG00000122299                             |
| 16 | 12010086 | 12010604 | KD2-H4K8ac_peak_10711 | 12.25733 | GSPT1_ENSG00000103342;AC007216.1_ENSG00000266163   |
| 16 | 12069927 | 12070463 | KD2-H4K8ac_peak_10712 | 7.90806  | RP11-166B2.1_ENSG00000234719;SNX29_ENSG00000048471 |
| 16 | 12072066 | 12072287 | KD2-H4K8ac_peak_10713 | 4.7849   | RP11-166B2.7_ENSG00000260488                       |
| 16 | 12849842 | 12850088 | KD2-H4K8ac_peak_10714 | 4.01115  |                                                    |
| 16 | 12897255 | 12897736 | KD2-H4K8ac_peak_10715 | 10.46264 | CPPED1_ENSG00000103381                             |
| 16 | 14014083 | 14014459 | KD2-H4K8ac_peak_10716 | 7.76104  | ERCC4_ENSG00000175595                              |

|    |          |          |                       |          |                                                                                 |
|----|----------|----------|-----------------------|----------|---------------------------------------------------------------------------------|
| 16 | 14096741 | 14097103 | KD2-H4K8ac_peak_10717 | 7.70289  |                                                                                 |
| 16 | 14164436 | 14165430 | KD2-H4K8ac_peak_10718 | 13.73635 | MKL2_ENSG00000186260                                                            |
| 16 | 14396255 | 14396507 | KD2-H4K8ac_peak_10719 | 6.0073   | RP11-65J21.3_ENSG00000262454                                                    |
| 16 | 14723687 | 14724060 | KD2-H4K8ac_peak_10720 | 11.92978 |                                                                                 |
| 16 | 14724384 | 14724842 | KD2-H4K8ac_peak_10721 | 7.70289  |                                                                                 |
| 16 | 14726010 | 14726420 | KD2-H4K8ac_peak_10722 | 6.30229  | PARN_ENSG00000140694;BFAR_ENSG00000103429                                       |
| 16 | 14726856 | 14727219 | KD2-H4K8ac_peak_10723 | 10.46874 | PARN_ENSG00000140694;BFAR_ENSG00000103429                                       |
| 16 | 14918610 | 14918851 | KD2-H4K8ac_peak_10724 | 8.1233   | ABCC6P2_ENSG00000255277                                                         |
| 16 | 15069022 | 15069405 | KD2-H4K8ac_peak_10725 | 5.92195  | PDXDC1_ENSG00000179889                                                          |
| 16 | 15149130 | 15149871 | KD2-H4K8ac_peak_10726 | 17.8868  | NTAN1_ENSG00000157045                                                           |
| 16 | 15187708 | 15188092 | KD2-H4K8ac_peak_10727 | 13.09607 | RRN3_ENSG00000085721;RP11-7218.1_ENSG00000260735                                |
| 16 | 15188300 | 15188856 | KD2-H4K8ac_peak_10728 | 10.86378 | RRN3_ENSG00000085721;RP11-7218.1_ENSG00000260735                                |
| 16 | 15235412 | 15236512 | KD2-H4K8ac_peak_10729 | 8.83582  |                                                                                 |
| 16 | 15236731 | 15238135 | KD2-H4K8ac_peak_10730 | 12.93209 |                                                                                 |
| 16 | 15238432 | 15239541 | KD2-H4K8ac_peak_10731 | 16.25886 |                                                                                 |
| 16 | 15239846 | 15240288 | KD2-H4K8ac_peak_10732 | 4.54006  |                                                                                 |
| 16 | 15241074 | 15241835 | KD2-H4K8ac_peak_10733 | 7.27716  |                                                                                 |
| 16 | 15248928 | 15249273 | KD2-H4K8ac_peak_10734 | 16.15695 | PKD1P6_ENSG00000250251;hsa-mir-3180-4_ENSG00000264115;MIR3180-4_ENSG00000257391 |
| 16 | 15489587 | 15490603 | KD2-H4K8ac_peak_10735 | 13.34404 | RP11-1021N1.1_ENSG00000261130;MPV17L_ENSG00000156968                            |
| 16 | 15527436 | 15528156 | KD2-H4K8ac_peak_10736 | 12.68903 | C16orf45_ENSG00000166780                                                        |
| 16 | 15736569 | 15736890 | KD2-H4K8ac_peak_10737 | 11.05467 | KIAA0430_ENSG00000166783;NDE1_ENSG00000072864;MIR484_ENSG00000272213            |
| 16 | 15743279 | 15743882 | KD2-H4K8ac_peak_10738 | 7.36933  |                                                                                 |
| 16 | 15744223 | 15744481 | KD2-H4K8ac_peak_10739 | 7.92775  |                                                                                 |
| 16 | 15982767 | 15983567 | KD2-H4K8ac_peak_10740 | 8.23274  | FOPNL_ENSG00000133393                                                           |
| 16 | 16036682 | 16037137 | KD2-H4K8ac_peak_10741 | 5.88845  |                                                                                 |
| 16 | 16043015 | 16043324 | KD2-H4K8ac_peak_10742 | 9.02573  | ABCC1_ENSG00000103222                                                           |
| 16 | 16043646 | 16044126 | KD2-H4K8ac_peak_10743 | 13.17969 | ABCC1_ENSG00000103222                                                           |
| 16 | 16084490 | 16084859 | KD2-H4K8ac_peak_10744 | 5.5051   |                                                                                 |
| 16 | 16243675 | 16243986 | KD2-H4K8ac_peak_10745 | 3.90565  |                                                                                 |
| 16 | 16244237 | 16244584 | KD2-H4K8ac_peak_10746 | 4.52514  |                                                                                 |
| 16 | 16268919 | 16269127 | KD2-H4K8ac_peak_10747 | 4.98072  |                                                                                 |
| 16 | 16317317 | 16317562 | KD2-H4K8ac_peak_10748 | 18.94636 | ABCC6_ENSG00000091262;RP11-517A5.7_ENSG00000262332                              |
| 16 | 17151912 | 17152119 | KD2-H4K8ac_peak_10749 | 3.65557  |                                                                                 |
| 16 | 17468780 | 17469082 | KD2-H4K8ac_peak_10750 | 4.12757  |                                                                                 |
| 16 | 17499012 | 17499705 | KD2-H4K8ac_peak_10751 | 9.32235  |                                                                                 |
| 16 | 17564336 | 17564704 | KD2-H4K8ac_peak_10752 | 4.84206  | XYLT1_ENSG00000103489                                                           |
| 16 | 17564956 | 17565165 | KD2-H4K8ac_peak_10753 | 9.36516  | XYLT1_ENSG00000103489                                                           |
| 16 | 17684077 | 17685636 | KD2-H4K8ac_peak_10754 | 15.5861  |                                                                                 |
| 16 | 17686395 | 17687021 | KD2-H4K8ac_peak_10755 | 4.42765  |                                                                                 |
| 16 | 17701327 | 17701894 | KD2-H4K8ac_peak_10756 | 6.40683  |                                                                                 |
| 16 | 17813147 | 17813344 | KD2-H4K8ac_peak_10757 | 7.51935  |                                                                                 |
| 16 | 17839234 | 17839812 | KD2-H4K8ac_peak_10758 | 5.43522  |                                                                                 |
| 16 | 17840438 | 17840643 | KD2-H4K8ac_peak_10759 | 6.60096  |                                                                                 |
| 16 | 17841609 | 17841830 | KD2-H4K8ac_peak_10760 | 8.70735  |                                                                                 |
| 16 | 17842198 | 17842629 | KD2-H4K8ac_peak_10761 | 9.8758   |                                                                                 |
| 16 | 17868081 | 17868398 | KD2-H4K8ac_peak_10762 | 9.11031  |                                                                                 |

|    |          |          |                       |          |                                                                                       |
|----|----------|----------|-----------------------|----------|---------------------------------------------------------------------------------------|
| 16 | 17870735 | 17871147 | KD2-H4K8ac_peak_10763 | 7.27716  |                                                                                       |
| 16 | 18065956 | 18066699 | KD2-H4K8ac_peak_10764 | 8.37231  |                                                                                       |
| 16 | 18801153 | 18801619 | KD2-H4K8ac_peak_10765 | 15.13261 | RPS15A_ENSG00000134419                                                                |
| 16 | 18801869 | 18802345 | KD2-H4K8ac_peak_10766 | 13.44374 | RPS15A_ENSG00000134419                                                                |
| 16 | 18812479 | 18812782 | KD2-H4K8ac_peak_10767 | 8.23274  | RP11-1035H13.3_ENSG00000260342;ARL6IP1_ENSG00000170540                                |
| 16 | 18813241 | 18813807 | KD2-H4K8ac_peak_10768 | 5.88845  | RP11-1035H13.3_ENSG00000260342;ARL6IP1_ENSG00000170540;RP11-1035H13.2_ENSG00000260017 |
| 16 | 18937209 | 18937647 | KD2-H4K8ac_peak_10769 | 5.59859  | SMG1_ENSG00000157106;CTD-2288F12.1_ENSG00000260352                                    |
| 16 | 18938345 | 18938958 | KD2-H4K8ac_peak_10770 | 9.15329  | SMG1_ENSG00000157106;CTD-2288F12.1_ENSG00000260352                                    |
| 16 | 18981029 | 18981225 | KD2-H4K8ac_peak_10771 | 4.01115  |                                                                                       |
| 16 | 18995260 | 18995913 | KD2-H4K8ac_peak_10772 | 13.88933 | TMC7_ENSG00000170537                                                                  |
| 16 | 19079358 | 19079898 | KD2-H4K8ac_peak_10773 | 12.06346 | RP11-626G11.5_ENSG00000261465;COQ7_ENSG00000167186                                    |
| 16 | 19097512 | 19097926 | KD2-H4K8ac_peak_10774 | 12.17278 | RP11-626G11.4_ENSG00000260430                                                         |
| 16 | 19124809 | 19125914 | KD2-H4K8ac_peak_10775 | 15.27939 | ITPRIPL2_ENSG00000205730;CTD-2349B8.1_ENSG00000261427                                 |
| 16 | 19179609 | 19180421 | KD2-H4K8ac_peak_10776 | 12.36441 | SYT17_ENSG00000103528                                                                 |
| 16 | 19243932 | 19244146 | KD2-H4K8ac_peak_10777 | 5.20908  |                                                                                       |
| 16 | 19359053 | 19359592 | KD2-H4K8ac_peak_10778 | 15.39543 |                                                                                       |
| 16 | 19364307 | 19364510 | KD2-H4K8ac_peak_10779 | 4.67737  |                                                                                       |
| 16 | 19566024 | 19566398 | KD2-H4K8ac_peak_10780 | 5.29555  | C16orf62_ENSG00000103544                                                              |
| 16 | 19567087 | 19567540 | KD2-H4K8ac_peak_10781 | 18.80827 | C16orf62_ENSG00000103544                                                              |
| 16 | 19729072 | 19729486 | KD2-H4K8ac_peak_10782 | 14.66631 | KNOP1_ENSG00000103550                                                                 |
| 16 | 19729834 | 19730334 | KD2-H4K8ac_peak_10783 | 5.54647  | KNOP1_ENSG00000103550                                                                 |
| 16 | 20817255 | 20817695 | KD2-H4K8ac_peak_10784 | 10.43145 | AC004381.6_ENSG00000005189                                                            |
| 16 | 20818011 | 20818614 | KD2-H4K8ac_peak_10785 | 3.97079  | AC004381.6_ENSG00000005189                                                            |
| 16 | 20911971 | 20912573 | KD2-H4K8ac_peak_10786 | 16.71655 | ERI2_ENSG00000196678;DCUN1D3_ENSG00000188215;LYRM1_ENSG00000102897                    |
| 16 | 21169985 | 21170255 | KD2-H4K8ac_peak_10787 | 7.27716  | DNAH3_ENSG00000158486;TMEM159_ENSG00000011638                                         |
| 16 | 21275538 | 21275806 | KD2-H4K8ac_peak_10788 | 6.66692  |                                                                                       |
| 16 | 21289334 | 21289823 | KD2-H4K8ac_peak_10789 | 8.74596  |                                                                                       |
| 16 | 21294995 | 21295259 | KD2-H4K8ac_peak_10790 | 9.20193  |                                                                                       |
| 16 | 21513249 | 21513491 | KD2-H4K8ac_peak_10791 | 7.28628  |                                                                                       |
| 16 | 21522870 | 21523274 | KD2-H4K8ac_peak_10792 | 7.28628  |                                                                                       |
| 16 | 21531089 | 21531738 | KD2-H4K8ac_peak_10793 | 9.67696  | CTD-2547E10.2_ENSG00000180747;SLC7A5P2_ENSG00000258186                                |
| 16 | 21531944 | 21533234 | KD2-H4K8ac_peak_10794 | 35.76486 | CTD-2547E10.2_ENSG00000180747;SLC7A5P2_ENSG00000258186                                |
| 16 | 21566606 | 21566800 | KD2-H4K8ac_peak_10795 | 7.81948  |                                                                                       |
| 16 | 21568327 | 21568557 | KD2-H4K8ac_peak_10796 | 7.25164  |                                                                                       |
| 16 | 21610401 | 21610691 | KD2-H4K8ac_peak_10797 | 23.33626 |                                                                                       |
| 16 | 21610915 | 21611431 | KD2-H4K8ac_peak_10798 | 11.05467 |                                                                                       |
| 16 | 21675184 | 21675593 | KD2-H4K8ac_peak_10799 | 4.86324  |                                                                                       |
| 16 | 21678589 | 21678901 | KD2-H4K8ac_peak_10800 | 6.40683  |                                                                                       |
| 16 | 21831355 | 21831700 | KD2-H4K8ac_peak_10801 | 7.76329  | RRN3P1_ENSG00000248124                                                                |
| 16 | 21964752 | 21965118 | KD2-H4K8ac_peak_10802 | 10.65724 | UQCRC2_ENSG00000140740                                                                |
| 16 | 22012550 | 22012745 | KD2-H4K8ac_peak_10803 | 4.06758  | PDZD9_ENSG00000155714                                                                 |
| 16 | 22018878 | 22019326 | KD2-H4K8ac_peak_10804 | 15.81711 | C16orf52_ENSG00000185716                                                              |
| 16 | 22019679 | 22020032 | KD2-H4K8ac_peak_10805 | 10.96455 | C16orf52_ENSG00000185716                                                              |
| 16 | 22207921 | 22208122 | KD2-H4K8ac_peak_10806 | 5.15777  |                                                                                       |
| 16 | 22216515 | 22216781 | KD2-H4K8ac_peak_10807 | 6.56926  | EEF2K_ENSG00000103319                                                                 |
| 16 | 22217671 | 22217928 | KD2-H4K8ac_peak_10808 | 15.41687 | EEF2K_ENSG00000103319                                                                 |

|    |          |          |                       |          |                                                                    |
|----|----------|----------|-----------------------|----------|--------------------------------------------------------------------|
| 16 | 22308764 | 22309231 | KD2-H4K8ac_peak_10809 | 15.61313 | POLR3E_ENSG00000058600                                             |
| 16 | 22385163 | 22385831 | KD2-H4K8ac_peak_10810 | 12.06346 | RP11-21M24.2_ENSG00000260790                                       |
| 16 | 22448472 | 22448919 | KD2-H4K8ac_peak_10811 | 8.10216  | CDR2_ENSG00000140743;RRN3P3_ENSG00000257122;SMG1P1_ENSG00000237296 |
| 16 | 22774952 | 22775205 | KD2-H4K8ac_peak_10812 | 9.11031  |                                                                    |
| 16 | 22967112 | 22967530 | KD2-H4K8ac_peak_10813 | 6.83936  |                                                                    |
| 16 | 22979962 | 22980186 | KD2-H4K8ac_peak_10814 | 4.77079  |                                                                    |
| 16 | 23038160 | 23038458 | KD2-H4K8ac_peak_10815 | 12.84642 |                                                                    |
| 16 | 23159783 | 23160050 | KD2-H4K8ac_peak_10816 | 4.86324  | USP31_ENSG00000103404                                              |
| 16 | 23160406 | 23160603 | KD2-H4K8ac_peak_10817 | 6.24114  | USP31_ENSG00000103404                                              |
| 16 | 23463978 | 23465042 | KD2-H4K8ac_peak_10818 | 17.43705 | COG7_ENSG00000168434;CTD-2270L9.4_ENSG00000260136                  |
| 16 | 23521359 | 23521686 | KD2-H4K8ac_peak_10819 | 9.06369  |                                                                    |
| 16 | 23568414 | 23568665 | KD2-H4K8ac_peak_10820 | 12.74171 | EARS2_ENSG00000103356;UBFD1_ENSG00000103353                        |
| 16 | 23569118 | 23569426 | KD2-H4K8ac_peak_10821 | 9.41619  | EARS2_ENSG00000103356;UBFD1_ENSG00000103353                        |
| 16 | 23607240 | 23607589 | KD2-H4K8ac_peak_10822 | 10.73134 | NDUFAB1_ENSG00000004779                                            |
| 16 | 23652218 | 23652574 | KD2-H4K8ac_peak_10823 | 6.30229  | PALB2_ENSG00000083093;DCTN5_ENSG00000166847                        |
| 16 | 23652800 | 23653116 | KD2-H4K8ac_peak_10824 | 7.96322  | PALB2_ENSG00000083093;DCTN5_ENSG00000166847                        |
| 16 | 23690335 | 23690795 | KD2-H4K8ac_peak_10825 | 5.405    |                                                                    |
| 16 | 24550951 | 24551253 | KD2-H4K8ac_peak_10826 | 10.09333 |                                                                    |
| 16 | 24676293 | 24676520 | KD2-H4K8ac_peak_10827 | 7.01964  |                                                                    |
| 16 | 24682166 | 24682564 | KD2-H4K8ac_peak_10828 | 8.30974  | AC012317.1_ENSG00000224310                                         |
| 16 | 24697212 | 24697711 | KD2-H4K8ac_peak_10829 | 6.0073   |                                                                    |
| 16 | 24697941 | 24698216 | KD2-H4K8ac_peak_10830 | 8.25022  |                                                                    |
| 16 | 24739414 | 24739616 | KD2-H4K8ac_peak_10831 | 6.40683  |                                                                    |
| 16 | 24740175 | 24740481 | KD2-H4K8ac_peak_10832 | 11.15509 | TNRC6A_ENSG00000090905                                             |
| 16 | 24740706 | 24741430 | KD2-H4K8ac_peak_10833 | 12.93209 | TNRC6A_ENSG00000090905                                             |
| 16 | 24864954 | 24865305 | KD2-H4K8ac_peak_10834 | 5.51783  |                                                                    |
| 16 | 25026037 | 25026622 | KD2-H4K8ac_peak_10835 | 7.83489  | ARHGAP17_ENSG00000140750;RP11-266L9.1_ENSG00000260714              |
| 16 | 25043123 | 25043370 | KD2-H4K8ac_peak_10836 | 11.86082 | RP11-266L9.4_ENSG00000262587                                       |
| 16 | 25077498 | 25078073 | KD2-H4K8ac_peak_10837 | 5.14125  | RP11-266L9.5_ENSG00000262155                                       |
| 16 | 25078306 | 25078534 | KD2-H4K8ac_peak_10838 | 9.1707   | RP11-266L9.5_ENSG00000262155                                       |
| 16 | 25117942 | 25118963 | KD2-H4K8ac_peak_10839 | 9.63487  |                                                                    |
| 16 | 25236965 | 25237218 | KD2-H4K8ac_peak_10840 | 11.20531 |                                                                    |
| 16 | 25268928 | 25270113 | KD2-H4K8ac_peak_10841 | 17.70837 | ZKSCAN2_ENSG00000155592                                            |
| 16 | 27215345 | 27215749 | KD2-H4K8ac_peak_10842 | 18.33962 | KDM8_ENSG00000155666                                               |
| 16 | 27246967 | 27247495 | KD2-H4K8ac_peak_10843 | 6.50927  |                                                                    |
| 16 | 27279504 | 27279942 | KD2-H4K8ac_peak_10844 | 5.9696   | NSMCE1_ENSG00000169189;CTD-3203P2.2_ENSG00000245888                |
| 16 | 27280238 | 27280987 | KD2-H4K8ac_peak_10845 | 11.43863 | NSMCE1_ENSG00000169189;CTD-3203P2.2_ENSG00000245888                |
| 16 | 27560746 | 27561185 | KD2-H4K8ac_peak_10846 | 7.70289  | GTF3C1_ENSG00000077235;KIAA0556_ENSG00000047578                    |
| 16 | 27734379 | 27734639 | KD2-H4K8ac_peak_10847 | 4.9025   | Y_RNA_ENSG00000201371                                              |
| 16 | 27794326 | 27794600 | KD2-H4K8ac_peak_10848 | 8.30974  |                                                                    |
| 16 | 27795653 | 27796919 | KD2-H4K8ac_peak_10849 | 10.19949 |                                                                    |
| 16 | 27937494 | 27938002 | KD2-H4K8ac_peak_10850 | 6.40683  |                                                                    |
| 16 | 27939604 | 27939852 | KD2-H4K8ac_peak_10851 | 5.15777  |                                                                    |
| 16 | 27956756 | 27957041 | KD2-H4K8ac_peak_10852 | 4.06758  |                                                                    |
| 16 | 28222725 | 28223285 | KD2-H4K8ac_peak_10853 | 15.10495 | XPO6_ENSG00000169180                                               |
| 16 | 28223648 | 28223896 | KD2-H4K8ac_peak_10854 | 9.51688  | XPO6_ENSG00000169180                                               |



|    |          |          |                       |          |                                                       |
|----|----------|----------|-----------------------|----------|-------------------------------------------------------|
| 16 | 28289276 | 28289593 | KD2-H4K8ac_peak_10855 | 8.85813  |                                                       |
| 16 | 28289967 | 28290256 | KD2-H4K8ac_peak_10856 | 6.66692  |                                                       |
| 16 | 28302241 | 28302479 | KD2-H4K8ac_peak_10857 | 6.60096  | RP11-57A19.2_ENSG00000246465                          |
| 16 | 28302834 | 28303455 | KD2-H4K8ac_peak_10858 | 8.93255  | RP11-57A19.2_ENSG00000246465;SBK1_ENSG00000188322     |
| 16 | 28303933 | 28304226 | KD2-H4K8ac_peak_10859 | 9.76863  | RP11-57A19.2_ENSG00000246465;SBK1_ENSG00000188322     |
| 16 | 28304457 | 28304739 | KD2-H4K8ac_peak_10860 | 7.11824  | SBK1_ENSG00000188322                                  |
| 16 | 28502741 | 28503669 | KD2-H4K8ac_peak_10861 | 12.69604 | CLN3_ENSG00000261832                                  |
| 16 | 28504002 | 28504515 | KD2-H4K8ac_peak_10862 | 8.52559  | CLN3_ENSG00000261832                                  |
| 16 | 28507794 | 28507988 | KD2-H4K8ac_peak_10863 | 6.0073   | CLN3_ENSG00000188603                                  |
| 16 | 28564650 | 28564939 | KD2-H4K8ac_peak_10864 | 8.10216  | CCDC101_ENSG00000176476                               |
| 16 | 28565241 | 28565507 | KD2-H4K8ac_peak_10865 | 18.41184 | CCDC101_ENSG00000176476                               |
| 16 | 28565840 | 28566083 | KD2-H4K8ac_peak_10866 | 5.88845  | CCDC101_ENSG00000176476                               |
| 16 | 28833524 | 28833832 | KD2-H4K8ac_peak_10867 | 6.85193  | RP11-1348G14.5_ENSG00000260796;ATXN2L_ENSG00000168488 |
| 16 | 28834567 | 28835188 | KD2-H4K8ac_peak_10868 | 18.37277 | ATXN2L_ENSG00000168488                                |
| 16 | 28857121 | 28857609 | KD2-H4K8ac_peak_10869 | 11.8457  | TUFM_ENSG00000178952;SH2B1_ENSG00000178188            |
| 16 | 28873689 | 28873916 | KD2-H4K8ac_peak_10870 | 9.68068  | RP11-22P6.2_ENSG00000261766                           |
| 16 | 28874115 | 28874570 | KD2-H4K8ac_peak_10871 | 9.36516  | RP11-22P6.2_ENSG00000261766                           |
| 16 | 28875311 | 28875597 | KD2-H4K8ac_peak_10872 | 7.76104  | RP11-22P6.2_ENSG00000261766                           |
| 16 | 28890621 | 28891112 | KD2-H4K8ac_peak_10873 | 8.10216  | ATP2A1_ENSG00000196296;RP11-22P6.3_ENSG00000260442    |
| 16 | 28891375 | 28892147 | KD2-H4K8ac_peak_10874 | 20.8421  | RP11-22P6.3_ENSG00000260442;SNORA43_ENSG00000252461   |
| 16 | 28913184 | 28913411 | KD2-H4K8ac_peak_10875 | 4.211    |                                                       |
| 16 | 28936391 | 28937045 | KD2-H4K8ac_peak_10876 | 10.7186  |                                                       |
| 16 | 28941945 | 28942210 | KD2-H4K8ac_peak_10877 | 7.05877  |                                                       |
| 16 | 28956557 | 28956871 | KD2-H4K8ac_peak_10878 | 9.89383  |                                                       |
| 16 | 28961405 | 28961903 | KD2-H4K8ac_peak_10879 | 9.08816  | NFATC2IP_ENSG00000176953                              |
| 16 | 28962338 | 28962724 | KD2-H4K8ac_peak_10880 | 16.49944 | NFATC2IP_ENSG00000176953                              |
| 16 | 28986292 | 28986677 | KD2-H4K8ac_peak_10881 | 8.4716   | SPNS1_ENSG00000169682;RP11-264B17.3_ENSG00000261067   |
| 16 | 29040699 | 29040916 | KD2-H4K8ac_peak_10882 | 5.43522  |                                                       |
| 16 | 29127549 | 29127746 | KD2-H4K8ac_peak_10883 | 4.77079  | RP11-426C22.5_ENSG00000260517                         |
| 16 | 29140695 | 29140972 | KD2-H4K8ac_peak_10884 | 3.97991  |                                                       |
| 16 | 29143918 | 29144119 | KD2-H4K8ac_peak_10885 | 5.30799  |                                                       |
| 16 | 29169157 | 29170163 | KD2-H4K8ac_peak_10886 | 8.82366  |                                                       |
| 16 | 29180659 | 29181608 | KD2-H4K8ac_peak_10887 | 15.25814 |                                                       |
| 16 | 29186806 | 29187758 | KD2-H4K8ac_peak_10888 | 13.9152  |                                                       |
| 16 | 29188145 | 29189573 | KD2-H4K8ac_peak_10889 | 22.21705 |                                                       |
| 16 | 29189808 | 29190299 | KD2-H4K8ac_peak_10890 | 4.51154  |                                                       |
| 16 | 29190533 | 29192188 | KD2-H4K8ac_peak_10891 | 15.25814 |                                                       |
| 16 | 29193844 | 29194956 | KD2-H4K8ac_peak_10892 | 4.44527  |                                                       |
| 16 | 29195760 | 29196087 | KD2-H4K8ac_peak_10893 | 4.86324  |                                                       |
| 16 | 29197614 | 29198019 | KD2-H4K8ac_peak_10894 | 5.88845  |                                                       |
| 16 | 29210718 | 29211035 | KD2-H4K8ac_peak_10895 | 4.8888   |                                                       |
| 16 | 29212176 | 29212586 | KD2-H4K8ac_peak_10896 | 6.99815  |                                                       |
| 16 | 29212809 | 29213018 | KD2-H4K8ac_peak_10897 | 8.55271  |                                                       |
| 16 | 29214159 | 29214513 | KD2-H4K8ac_peak_10898 | 5.59859  |                                                       |
| 16 | 29231890 | 29232188 | KD2-H4K8ac_peak_10899 | 7.27716  | RP11-426C22.4_ENSG00000259807                         |
| 16 | 29233385 | 29233775 | KD2-H4K8ac_peak_10900 | 6.99815  |                                                       |

|    |          |          |                       |          |                                                      |
|----|----------|----------|-----------------------|----------|------------------------------------------------------|
| 16 | 29239779 | 29240152 | KD2-H4K8ac_peak_10901 | 4.42765  |                                                      |
| 16 | 29266477 | 29267069 | KD2-H4K8ac_peak_10902 | 9.36516  |                                                      |
| 16 | 29268854 | 29269078 | KD2-H4K8ac_peak_10903 | 5.30799  |                                                      |
| 16 | 29270333 | 29272527 | KD2-H4K8ac_peak_10904 | 18.54875 |                                                      |
| 16 | 29272828 | 29273042 | KD2-H4K8ac_peak_10905 | 8.85813  |                                                      |
| 16 | 29273278 | 29273869 | KD2-H4K8ac_peak_10906 | 20.32753 |                                                      |
| 16 | 29275470 | 29276661 | KD2-H4K8ac_peak_10907 | 14.69247 | RP11-426C22.6_ENSG00000260953                        |
| 16 | 29303170 | 29303474 | KD2-H4K8ac_peak_10908 | 6.99815  |                                                      |
| 16 | 29311688 | 29312135 | KD2-H4K8ac_peak_10909 | 6.13909  |                                                      |
| 16 | 29325513 | 29325972 | KD2-H4K8ac_peak_10910 | 6.72021  |                                                      |
| 16 | 29348792 | 29348991 | KD2-H4K8ac_peak_10911 | 5.88845  |                                                      |
| 16 | 29614669 | 29614887 | KD2-H4K8ac_peak_10912 | 6.40683  |                                                      |
| 16 | 29618416 | 29618639 | KD2-H4K8ac_peak_10913 | 6.0073   |                                                      |
| 16 | 29624749 | 29624943 | KD2-H4K8ac_peak_10914 | 7.146    | SLC7A5P1_ENSG00000260727                             |
| 16 | 29625242 | 29625547 | KD2-H4K8ac_peak_10915 | 8.55271  | SLC7A5P1_ENSG00000260727                             |
| 16 | 29687758 | 29688120 | KD2-H4K8ac_peak_10916 | 6.86812  |                                                      |
| 16 | 29690661 | 29690910 | KD2-H4K8ac_peak_10917 | 7.51054  |                                                      |
| 16 | 29691418 | 29691722 | KD2-H4K8ac_peak_10918 | 7.95563  |                                                      |
| 16 | 29740410 | 29740710 | KD2-H4K8ac_peak_10919 | 7.98152  |                                                      |
| 16 | 29800974 | 29801773 | KD2-H4K8ac_peak_10920 | 15.52826 | KIF22_ENSG00000079616                                |
| 16 | 29802078 | 29802611 | KD2-H4K8ac_peak_10921 | 14.15075 | KIF22_ENSG00000079616                                |
| 16 | 29816119 | 29816711 | KD2-H4K8ac_peak_10922 | 13.87818 | MAZ_ENSG00000103495                                  |
| 16 | 29818005 | 29819153 | KD2-H4K8ac_peak_10923 | 18.54875 | MAZ_ENSG00000103495;AC009133.15_ENSG00000259952      |
| 16 | 29822943 | 29823321 | KD2-H4K8ac_peak_10924 | 5.59859  | AC009133.14_ENSG00000238045;PRRT2_ENSG00000167371    |
| 16 | 29823661 | 29824327 | KD2-H4K8ac_peak_10925 | 8.30974  | AC009133.14_ENSG00000238045;PRRT2_ENSG00000167371    |
| 16 | 29826621 | 29826902 | KD2-H4K8ac_peak_10926 | 7.76329  | PAGR1_ENSG00000185928;PAGR1_ENSG00000263136          |
| 16 | 29827468 | 29828270 | KD2-H4K8ac_peak_10927 | 12.32775 | PAGR1_ENSG00000185928;PAGR1_ENSG00000263136          |
| 16 | 29874155 | 29874433 | KD2-H4K8ac_peak_10928 | 7.74292  | CDIPT_ENSG00000103502;CDIPT-AS1_ENSG00000214725      |
| 16 | 29875010 | 29875647 | KD2-H4K8ac_peak_10929 | 15.13261 | CDIPT_ENSG00000103502;CDIPT-AS1_ENSG00000214725      |
| 16 | 29912417 | 29912650 | KD2-H4K8ac_peak_10930 | 4.9025   | ASPHD1_ENSG00000174939                               |
| 16 | 29937689 | 29937932 | KD2-H4K8ac_peak_10931 | 10.05606 | KCTD13_ENSG00000174943;CTD-2574D22.2_ENSG00000247735 |
| 16 | 29938139 | 29938342 | KD2-H4K8ac_peak_10932 | 4.52326  | KCTD13_ENSG00000174943;CTD-2574D22.2_ENSG00000247735 |
| 16 | 29972705 | 29973184 | KD2-H4K8ac_peak_10933 | 8.53092  |                                                      |
| 16 | 29985263 | 29985587 | KD2-H4K8ac_peak_10934 | 9.10868  | TAOK2_ENSG00000149930                                |
| 16 | 30006517 | 30007334 | KD2-H4K8ac_peak_10935 | 12.30509 | HIRIP3_ENSG00000149929;INO80E_ENSG00000169592        |
| 16 | 30007717 | 30008331 | KD2-H4K8ac_peak_10936 | 7.36799  | HIRIP3_ENSG00000149929                               |
| 16 | 30022545 | 30022788 | KD2-H4K8ac_peak_10937 | 6.40297  |                                                      |
| 16 | 30032462 | 30032965 | KD2-H4K8ac_peak_10938 | 14.15075 |                                                      |
| 16 | 30042416 | 30042875 | KD2-H4K8ac_peak_10939 | 7.07117  |                                                      |
| 16 | 30043088 | 30043456 | KD2-H4K8ac_peak_10940 | 7.0754   |                                                      |
| 16 | 30063937 | 30064305 | KD2-H4K8ac_peak_10941 | 9.84972  | FAM57B_ENSG00000149926;ALDOA_ENSG00000149925         |
| 16 | 30064563 | 30064987 | KD2-H4K8ac_peak_10942 | 3.75035  | FAM57B_ENSG00000149926;ALDOA_ENSG00000149925         |
| 16 | 30075023 | 30075270 | KD2-H4K8ac_peak_10943 | 5.75757  |                                                      |
| 16 | 30075661 | 30076854 | KD2-H4K8ac_peak_10944 | 13.27022 |                                                      |
| 16 | 30086520 | 30086991 | KD2-H4K8ac_peak_10945 | 7.76329  | PPP4C_ENSG00000149923                                |
| 16 | 30102411 | 30102641 | KD2-H4K8ac_peak_10946 | 3.97079  | TBX6_ENSG00000149922                                 |

|    |          |          |                       |          |                                                                           |
|----|----------|----------|-----------------------|----------|---------------------------------------------------------------------------|
| 16 | 30103461 | 30104278 | KD2-H4K8ac_peak_10947 | 20.10577 | TBX6_ENSG00000149922                                                      |
| 16 | 30107806 | 30108258 | KD2-H4K8ac_peak_10948 | 18.59584 | YPEL3_ENSG00000090238;RP11-455F5.3_ENSG00000250616                        |
| 16 | 30133766 | 30134410 | KD2-H4K8ac_peak_10949 | 16.57619 | MAPK3_ENSG00000102882                                                     |
| 16 | 30134705 | 30135328 | KD2-H4K8ac_peak_10950 | 11.7296  | MAPK3_ENSG00000102882                                                     |
| 16 | 30149413 | 30149891 | KD2-H4K8ac_peak_10951 | 5.57044  |                                                                           |
| 16 | 30194203 | 30194788 | KD2-H4K8ac_peak_10952 | 10.19949 | CORO1A_ENSG00000102879                                                    |
| 16 | 30195534 | 30195738 | KD2-H4K8ac_peak_10953 | 9.36516  | RP11-455F5.5_ENSG00000261416                                              |
| 16 | 30366168 | 30366501 | KD2-H4K8ac_peak_10954 | 5.13615  | CD2BP2_ENSG00000169217;RP11-347C12.10_ENSG00000260219                     |
| 16 | 30366841 | 30367429 | KD2-H4K8ac_peak_10955 | 11.90231 | CD2BP2_ENSG00000169217;RP11-347C12.10_ENSG00000260219                     |
| 16 | 30381408 | 30381708 | KD2-H4K8ac_peak_10956 | 8.10216  | TBC1D10B_ENSG00000169221;MYLPP_ENSG00000180209                            |
| 16 | 30382714 | 30383033 | KD2-H4K8ac_peak_10957 | 8.04448  | MYLPP_ENSG00000180209                                                     |
| 16 | 30388551 | 30389509 | KD2-H4K8ac_peak_10958 | 10.80014 | ZNF48_ENSG00000180035                                                     |
| 16 | 30404747 | 30406225 | KD2-H4K8ac_peak_10959 | 15.61313 |                                                                           |
| 16 | 30406851 | 30407321 | KD2-H4K8ac_peak_10960 | 6.67538  | SEPT1_ENSG00000180096                                                     |
| 16 | 30411188 | 30411384 | KD2-H4K8ac_peak_10961 | 5.34636  |                                                                           |
| 16 | 30411819 | 30412307 | KD2-H4K8ac_peak_10962 | 6.75585  |                                                                           |
| 16 | 30418284 | 30418676 | KD2-H4K8ac_peak_10963 | 12.88108 | ZNF771_ENSG00000179965                                                    |
| 16 | 30419043 | 30419249 | KD2-H4K8ac_peak_10964 | 9.73431  | ZNF771_ENSG00000179965                                                    |
| 16 | 30428834 | 30429120 | KD2-H4K8ac_peak_10965 | 10.73134 |                                                                           |
| 16 | 30440788 | 30441328 | KD2-H4K8ac_peak_10966 | 21.09577 | DCTPP1_ENSG00000179958                                                    |
| 16 | 30441793 | 30442283 | KD2-H4K8ac_peak_10967 | 10.19949 | DCTPP1_ENSG00000179958                                                    |
| 16 | 30456868 | 30457158 | KD2-H4K8ac_peak_10968 | 16.57619 | SEPHS2_ENSG00000179918                                                    |
| 16 | 30457712 | 30457925 | KD2-H4K8ac_peak_10969 | 5.21139  | SEPHS2_ENSG00000179918                                                    |
| 16 | 30537487 | 30537902 | KD2-H4K8ac_peak_10970 | 6.25869  | ZNF768_ENSG00000169957                                                    |
| 16 | 30538207 | 30538672 | KD2-H4K8ac_peak_10971 | 25.95849 | ZNF768_ENSG00000169957                                                    |
| 16 | 30545254 | 30546189 | KD2-H4K8ac_peak_10972 | 24.30324 | ZNF747_ENSG00000169955;ZNF747_ENSG00000261459;AC002310.12_ENSG00000235560 |
| 16 | 30546398 | 30546609 | KD2-H4K8ac_peak_10973 | 4.37809  | ZNF747_ENSG00000169955;ZNF747_ENSG00000261459;AC002310.12_ENSG00000235560 |
| 16 | 30569182 | 30569684 | KD2-H4K8ac_peak_10974 | 16.67374 | AC002310.13_ENSG00000260869;ZNF764_ENSG00000169951                        |
| 16 | 30569994 | 30570618 | KD2-H4K8ac_peak_10975 | 13.73635 | AC002310.13_ENSG00000260869;ZNF764_ENSG00000169951                        |
| 16 | 30582166 | 30583150 | KD2-H4K8ac_peak_10976 | 16.86242 | ZNF688_ENSG00000229809;AC002310.7_ENSG00000239791                         |
| 16 | 30583804 | 30584031 | KD2-H4K8ac_peak_10977 | 6.0073   | ZNF688_ENSG00000229809;AC002310.7_ENSG00000239791                         |
| 16 | 30596452 | 30597005 | KD2-H4K8ac_peak_10978 | 27.97933 | ZNF785_ENSG00000197162;RP11-146F11.5_ENSG00000260167                      |
| 16 | 30597336 | 30597806 | KD2-H4K8ac_peak_10979 | 8.94469  | ZNF785_ENSG00000197162;RP11-146F11.5_ENSG00000260167                      |
| 16 | 30621063 | 30621652 | KD2-H4K8ac_peak_10980 | 14.17488 |                                                                           |
| 16 | 30639553 | 30640069 | KD2-H4K8ac_peak_10981 | 6.31143  |                                                                           |
| 16 | 30644955 | 30645325 | KD2-H4K8ac_peak_10982 | 5.54647  |                                                                           |
| 16 | 30645888 | 30646379 | KD2-H4K8ac_peak_10983 | 11.89502 |                                                                           |
| 16 | 30661420 | 30661655 | KD2-H4K8ac_peak_10984 | 7.76104  | PRR14_ENSG00000156858                                                     |
| 16 | 30662418 | 30662805 | KD2-H4K8ac_peak_10985 | 6.52179  | PRR14_ENSG00000156858                                                     |
| 16 | 30670365 | 30670756 | KD2-H4K8ac_peak_10986 | 8.65175  | FBR5_ENSG00000156860                                                      |
| 16 | 30670978 | 30671298 | KD2-H4K8ac_peak_10987 | 9.95119  |                                                                           |
| 16 | 30709141 | 30709343 | KD2-H4K8ac_peak_10988 | 9.07715  | SRCAP_ENSG00000080603                                                     |
| 16 | 30709575 | 30710353 | KD2-H4K8ac_peak_10989 | 12.65012 | RP11-146F11.1_ENSG00000261840;SRCAP_ENSG00000080603                       |
| 16 | 30759072 | 30759371 | KD2-H4K8ac_peak_10990 | 6.40297  | PHKG2_ENSG00000156873                                                     |
| 16 | 30772981 | 30773260 | KD2-H4K8ac_peak_10991 | 8.17902  | C16orf93_ENSG00000196118;RNF40_ENSG00000103549                            |
| 16 | 30773674 | 30774042 | KD2-H4K8ac_peak_10992 | 8.55271  | C16orf93_ENSG00000196118;RNF40_ENSG00000103549                            |

|    |          |          |                       |          |                                                                                   |
|----|----------|----------|-----------------------|----------|-----------------------------------------------------------------------------------|
| 16 | 30786394 | 30786683 | KD2-H4K8ac_peak_10993 | 6.99815  |                                                                                   |
| 16 | 30786900 | 30787634 | KD2-H4K8ac_peak_10994 | 10.43145 |                                                                                   |
| 16 | 30797843 | 30799181 | KD2-H4K8ac_peak_10995 | 21.6161  | ZNF629_ENSG00000102870                                                            |
| 16 | 30817005 | 30817413 | KD2-H4K8ac_peak_10996 | 10.29842 |                                                                                   |
| 16 | 30824776 | 30825664 | KD2-H4K8ac_peak_10997 | 13.36684 |                                                                                   |
| 16 | 30885914 | 30886585 | KD2-H4K8ac_peak_10998 | 7.11824  | MIR4519_ENSG00000260083;MIR4519_ENSG00000265991                                   |
| 16 | 30886812 | 30887688 | KD2-H4K8ac_peak_10999 | 6.66692  | MIR4519_ENSG00000260083;MIR4519_ENSG00000265991                                   |
| 16 | 30904878 | 30905325 | KD2-H4K8ac_peak_11000 | 9.98013  | BCL7C_ENSG00000099385;MIR762_ENSG00000211591                                      |
| 16 | 30907580 | 30907817 | KD2-H4K8ac_peak_11001 | 7.36799  | CTF1_ENSG00000150281                                                              |
| 16 | 30908017 | 30908288 | KD2-H4K8ac_peak_11002 | 4.06758  | CTF1_ENSG00000150281                                                              |
| 16 | 30913311 | 30913508 | KD2-H4K8ac_peak_11003 | 9.16605  |                                                                                   |
| 16 | 30913744 | 30914274 | KD2-H4K8ac_peak_11004 | 5.14125  |                                                                                   |
| 16 | 30915351 | 30915876 | KD2-H4K8ac_peak_11005 | 7.36799  |                                                                                   |
| 16 | 30932294 | 30932583 | KD2-H4K8ac_peak_11006 | 5.77265  |                                                                                   |
| 16 | 30933260 | 30933719 | KD2-H4K8ac_peak_11007 | 5.1628   | FBXL19-AS1_ENSG00000260852;FBXL19_ENSG00000099364                                 |
| 16 | 30934223 | 30934434 | KD2-H4K8ac_peak_11008 | 4.68059  | FBXL19-AS1_ENSG00000260852;FBXL19_ENSG00000099364                                 |
| 16 | 30934875 | 30935803 | KD2-H4K8ac_peak_11009 | 19.87796 | FBXL19-AS1_ENSG00000260852;FBXL19_ENSG00000099364                                 |
| 16 | 30938930 | 30939274 | KD2-H4K8ac_peak_11010 | 5.88845  |                                                                                   |
| 16 | 30960458 | 30960769 | KD2-H4K8ac_peak_11011 | 9.65086  | AC135048.13_ENSG00000261487;ORAI3_ENSG00000175938                                 |
| 16 | 30965335 | 30965636 | KD2-H4K8ac_peak_11012 | 5.02516  |                                                                                   |
| 16 | 30968323 | 30969469 | KD2-H4K8ac_peak_11013 | 15.61313 | SETD1A_ENSG00000099381                                                            |
| 16 | 31008003 | 31008197 | KD2-H4K8ac_peak_11014 | 6.16888  |                                                                                   |
| 16 | 31022291 | 31022514 | KD2-H4K8ac_peak_11015 | 5.54647  | STX1B_ENSG00000099365                                                             |
| 16 | 31044091 | 31044670 | KD2-H4K8ac_peak_11016 | 19.1048  | STX4_ENSG00000103496                                                              |
| 16 | 31084841 | 31085068 | KD2-H4K8ac_peak_11017 | 11.00004 | ZNF668_ENSG00000167394;ZNF646_ENSG00000167395                                     |
| 16 | 31085766 | 31085967 | KD2-H4K8ac_peak_11018 | 12.08081 | ZNF668_ENSG00000167394;ZNF646_ENSG00000167395                                     |
| 16 | 31105747 | 31105988 | KD2-H4K8ac_peak_11019 | 8.95692  | RP11-196G11.1_ENSG00000255439                                                     |
| 16 | 31106483 | 31106712 | KD2-H4K8ac_peak_11020 | 7.69287  | RP11-196G11.1_ENSG00000255439;VKORC1_ENSG00000167397                              |
| 16 | 31116618 | 31116854 | KD2-H4K8ac_peak_11021 | 8.87298  | BCKDK_ENSG00000103507                                                             |
| 16 | 31117205 | 31117557 | KD2-H4K8ac_peak_11022 | 5.38581  | BCKDK_ENSG00000103507                                                             |
| 16 | 31119818 | 31120305 | KD2-H4K8ac_peak_11023 | 5.4779   | AC135050.1_ENSG00000252809                                                        |
| 16 | 31153937 | 31154531 | KD2-H4K8ac_peak_11024 | 20.0792  |                                                                                   |
| 16 | 31190794 | 31191084 | KD2-H4K8ac_peak_11025 | 10.05606 | FUS_ENSG00000089280                                                               |
| 16 | 31439432 | 31439697 | KD2-H4K8ac_peak_11026 | 5.88845  | COX6A2_ENSG00000156885                                                            |
| 16 | 31453341 | 31454355 | KD2-H4K8ac_peak_11027 | 10.19949 | ZNF843_ENSG00000176723                                                            |
| 16 | 31470235 | 31471064 | KD2-H4K8ac_peak_11028 | 15.9754  | RP11-452L6.5_ENSG00000260267;ARMC5_ENSG00000140691                                |
| 16 | 31471652 | 31472020 | KD2-H4K8ac_peak_11029 | 4.66652  | RP11-452L6.5_ENSG00000260267                                                      |
| 16 | 31482818 | 31484304 | KD2-H4K8ac_peak_11030 | 20.78681 | TGFB1I1_ENSG00000140682                                                           |
| 16 | 31499178 | 31499403 | KD2-H4K8ac_peak_11031 | 6.97919  | AC026471.6_ENSG00000260740                                                        |
| 16 | 31519314 | 31520032 | KD2-H4K8ac_peak_11032 | 16.04168 | C16orf58_ENSG00000140688;RP11-452L6.7_ENSG00000260625                             |
| 16 | 31711867 | 31712285 | KD2-H4K8ac_peak_11033 | 13.44374 | CTD-2358C21.3_ENSG00000260568;CLUHP3_ENSG00000131797                              |
| 16 | 31724651 | 31724981 | KD2-H4K8ac_peak_11034 | 12.80176 | ZNF720_ENSG00000197302                                                            |
| 16 | 32200172 | 32200475 | KD2-H4K8ac_peak_11035 | 5.25071  | HERC2P4_ENSG00000230267;RP11-17M15.1_ENSG00000260847;RP11-56L13.4_ENSG00000260649 |
| 16 | 32265562 | 32266020 | KD2-H4K8ac_peak_11036 | 9.20193  | RP11-56L13.7_ENSG00000260575                                                      |
| 16 | 33318917 | 33319172 | KD2-H4K8ac_peak_11037 | 5.88845  |                                                                                   |
| 16 | 33509221 | 33509647 | KD2-H4K8ac_peak_11038 | 14.99434 |                                                                                   |

|    |          |          |                       |          |                                                             |
|----|----------|----------|-----------------------|----------|-------------------------------------------------------------|
| 16 | 34441380 | 34441794 | KD2-H4K8ac_peak_11039 | 6.40297  | RP11-244B22.5_ENSG00000261274;RP11-488I20.8_ENSG00000260958 |
| 16 | 34489969 | 34490526 | KD2-H4K8ac_peak_11040 | 9.72244  | RARRES2P6_ENSG00000261010                                   |
| 16 | 34586706 | 34587256 | KD2-H4K8ac_peak_11041 | 11.89502 | RP11-488I20.4_ENSG00000260480                               |
| 16 | 34740076 | 34740362 | KD2-H4K8ac_peak_11042 | 7.81657  | RP11-80F22.15_ENSG00000260857                               |
| 16 | 34741008 | 34741405 | KD2-H4K8ac_peak_11043 | 8.34752  | RP11-80F22.15_ENSG00000260857;RP11-80F22.2_ENSG00000269622  |
| 16 | 46654855 | 46655150 | KD2-H4K8ac_peak_11044 | 3.97079  | SHCBP1_ENSG00000171241                                      |
| 16 | 46663593 | 46663818 | KD2-H4K8ac_peak_11045 | 7.47462  |                                                             |
| 16 | 46723263 | 46723984 | KD2-H4K8ac_peak_11046 | 11.24702 | VPS35_ENSG00000069329;ORC6_ENSG00000091651                  |
| 16 | 46864462 | 46865044 | KD2-H4K8ac_peak_11047 | 10.46264 | C16orf87_ENSG00000155330                                    |
| 16 | 46917602 | 46917818 | KD2-H4K8ac_peak_11048 | 10.30284 | GPT2_ENSG00000166123                                        |
| 16 | 46918316 | 46919062 | KD2-H4K8ac_peak_11049 | 8.94469  | GPT2_ENSG00000166123                                        |
| 16 | 47006889 | 47007469 | KD2-H4K8ac_peak_11050 | 9.1707   | DNAJA2_ENSG00000069345;RP11-169E6.1_ENSG00000261173         |
| 16 | 47007719 | 47008012 | KD2-H4K8ac_peak_11051 | 9.95119  | DNAJA2_ENSG00000069345;RP11-169E6.1_ENSG00000261173         |
| 16 | 47071350 | 47071782 | KD2-H4K8ac_peak_11052 | 10.7186  |                                                             |
| 16 | 47072200 | 47072425 | KD2-H4K8ac_peak_11053 | 8.09472  |                                                             |
| 16 | 47176770 | 47178329 | KD2-H4K8ac_peak_11054 | 15.22643 | NETO2_ENSG00000171208;RP11-329J18.2_ENSG00000260281         |
| 16 | 47494730 | 47495393 | KD2-H4K8ac_peak_11055 | 11.89502 | PHKB_ENSG00000102893                                        |
| 16 | 47746571 | 47746810 | KD2-H4K8ac_peak_11056 | 7.70289  |                                                             |
| 16 | 47747648 | 47747943 | KD2-H4K8ac_peak_11057 | 7.47462  |                                                             |
| 16 | 48277654 | 48277857 | KD2-H4K8ac_peak_11058 | 7.27716  | LONP2_ENSG00000102910                                       |
| 16 | 48278248 | 48278583 | KD2-H4K8ac_peak_11059 | 6.36375  | LONP2_ENSG00000102910                                       |
| 16 | 48418319 | 48419289 | KD2-H4K8ac_peak_11060 | 20.5798  |                                                             |
| 16 | 48419512 | 48419937 | KD2-H4K8ac_peak_11061 | 8.16906  |                                                             |
| 16 | 48565240 | 48565757 | KD2-H4K8ac_peak_11062 | 16.61426 |                                                             |
| 16 | 48644309 | 48644650 | KD2-H4K8ac_peak_11063 | 7.67504  |                                                             |
| 16 | 48656765 | 48657153 | KD2-H4K8ac_peak_11064 | 5.08628  | RP11-42I10.1_ENSG00000260086                                |
| 16 | 48657425 | 48657852 | KD2-H4K8ac_peak_11065 | 7.76329  | RP11-42I10.1_ENSG00000260086                                |
| 16 | 49316032 | 49316443 | KD2-H4K8ac_peak_11066 | 14.15075 | CBLN1_ENSG00000102924                                       |
| 16 | 49526114 | 49526608 | KD2-H4K8ac_peak_11067 | 11.86082 |                                                             |
| 16 | 49557377 | 49557790 | KD2-H4K8ac_peak_11068 | 6.69844  |                                                             |
| 16 | 49558004 | 49558596 | KD2-H4K8ac_peak_11069 | 14.14575 |                                                             |
| 16 | 49558814 | 49559604 | KD2-H4K8ac_peak_11070 | 13.30514 |                                                             |
| 16 | 49560889 | 49561184 | KD2-H4K8ac_peak_11071 | 4.211    |                                                             |
| 16 | 49627510 | 49627786 | KD2-H4K8ac_peak_11072 | 3.75035  |                                                             |
| 16 | 49628645 | 49629193 | KD2-H4K8ac_peak_11073 | 10.41994 |                                                             |
| 16 | 49630757 | 49631193 | KD2-H4K8ac_peak_11074 | 11.24702 |                                                             |
| 16 | 49633681 | 49634163 | KD2-H4K8ac_peak_11075 | 7.96322  |                                                             |
| 16 | 49635607 | 49635978 | KD2-H4K8ac_peak_11076 | 5.16215  |                                                             |
| 16 | 49654653 | 49655679 | KD2-H4K8ac_peak_11077 | 17.8868  |                                                             |
| 16 | 49673029 | 49673993 | KD2-H4K8ac_peak_11078 | 7.47462  |                                                             |
| 16 | 49674882 | 49675339 | KD2-H4K8ac_peak_11079 | 6.65673  |                                                             |
| 16 | 49686260 | 49686562 | KD2-H4K8ac_peak_11080 | 7.76329  |                                                             |
| 16 | 49697414 | 49698435 | KD2-H4K8ac_peak_11081 | 17.27647 |                                                             |
| 16 | 49698733 | 49699272 | KD2-H4K8ac_peak_11082 | 9.95342  |                                                             |
| 16 | 49699491 | 49699683 | KD2-H4K8ac_peak_11083 | 4.86324  |                                                             |
| 16 | 49730313 | 49731016 | KD2-H4K8ac_peak_11084 | 12.84642 |                                                             |

|    |          |          |                       |          |                                                                                 |
|----|----------|----------|-----------------------|----------|---------------------------------------------------------------------------------|
| 16 | 49731806 | 49732162 | KD2-H4K8ac_peak_11085 | 6.20982  |                                                                                 |
| 16 | 49732661 | 49733456 | KD2-H4K8ac_peak_11086 | 12.78794 |                                                                                 |
| 16 | 49733676 | 49733962 | KD2-H4K8ac_peak_11087 | 11.92978 |                                                                                 |
| 16 | 49734223 | 49734694 | KD2-H4K8ac_peak_11088 | 6.65673  |                                                                                 |
| 16 | 49776574 | 49776782 | KD2-H4K8ac_peak_11089 | 5.82799  |                                                                                 |
| 16 | 49778046 | 49778410 | KD2-H4K8ac_peak_11090 | 4.86324  |                                                                                 |
| 16 | 49786053 | 49786274 | KD2-H4K8ac_peak_11091 | 12.00597 |                                                                                 |
| 16 | 49788739 | 49789252 | KD2-H4K8ac_peak_11092 | 7.76104  |                                                                                 |
| 16 | 49810380 | 49810742 | KD2-H4K8ac_peak_11093 | 4.77079  |                                                                                 |
| 16 | 49843717 | 49844049 | KD2-H4K8ac_peak_11094 | 7.76329  |                                                                                 |
| 16 | 49851117 | 49851565 | KD2-H4K8ac_peak_11095 | 6.56211  | AC027348.1_ENSG00000265708                                                      |
| 16 | 49855413 | 49855960 | KD2-H4K8ac_peak_11096 | 7.36799  |                                                                                 |
| 16 | 49856245 | 49856490 | KD2-H4K8ac_peak_11097 | 7.58939  |                                                                                 |
| 16 | 49867786 | 49867981 | KD2-H4K8ac_peak_11098 | 5.57044  |                                                                                 |
| 16 | 49868440 | 49869817 | KD2-H4K8ac_peak_11099 | 11.89502 |                                                                                 |
| 16 | 49880412 | 49880614 | KD2-H4K8ac_peak_11100 | 5.88845  |                                                                                 |
| 16 | 49888546 | 49889409 | KD2-H4K8ac_peak_11101 | 15.81711 |                                                                                 |
| 16 | 49889681 | 49889920 | KD2-H4K8ac_peak_11102 | 9.1707   |                                                                                 |
| 16 | 49890557 | 49891065 | KD2-H4K8ac_peak_11103 | 5.405    | ZNF423_ENSG00000102935                                                          |
| 16 | 49891766 | 49892334 | KD2-H4K8ac_peak_11104 | 8.3261   | ZNF423_ENSG00000102935                                                          |
| 16 | 49892565 | 49893193 | KD2-H4K8ac_peak_11105 | 7.44324  | ZNF423_ENSG00000102935                                                          |
| 16 | 49900238 | 49900670 | KD2-H4K8ac_peak_11106 | 11.24702 |                                                                                 |
| 16 | 49900953 | 49901456 | KD2-H4K8ac_peak_11107 | 11.92978 |                                                                                 |
| 16 | 49902139 | 49902348 | KD2-H4K8ac_peak_11108 | 4.12757  |                                                                                 |
| 16 | 49910323 | 49910572 | KD2-H4K8ac_peak_11109 | 10.2048  |                                                                                 |
| 16 | 49917097 | 49917390 | KD2-H4K8ac_peak_11110 | 5.15777  |                                                                                 |
| 16 | 49955101 | 49955811 | KD2-H4K8ac_peak_11111 | 8.30974  |                                                                                 |
| 16 | 50059228 | 50059533 | KD2-H4K8ac_peak_11112 | 7.07117  | CNEP1R1_ENSG00000205423                                                         |
| 16 | 50099937 | 50100188 | KD2-H4K8ac_peak_11113 | 15.82362 | RP11-429P3.3_ENSG00000259843;HEATR3_ENSG00000155393                             |
| 16 | 50186799 | 50187007 | KD2-H4K8ac_peak_11114 | 6.99815  | PAPD5_ENSG00000121274                                                           |
| 16 | 50278638 | 50278919 | KD2-H4K8ac_peak_11115 | 9.72244  |                                                                                 |
| 16 | 50279226 | 50279770 | KD2-H4K8ac_peak_11116 | 10.90946 | ADCY7_ENSG00000121281                                                           |
| 16 | 50280057 | 50280695 | KD2-H4K8ac_peak_11117 | 8.30974  | ADCY7_ENSG00000121281                                                           |
| 16 | 50281039 | 50281251 | KD2-H4K8ac_peak_11118 | 6.2159   | ADCY7_ENSG00000121281                                                           |
| 16 | 50299607 | 50300086 | KD2-H4K8ac_peak_11119 | 4.86324  |                                                                                 |
| 16 | 50300444 | 50300825 | KD2-H4K8ac_peak_11120 | 13.36684 |                                                                                 |
| 16 | 50331787 | 50332107 | KD2-H4K8ac_peak_11121 | 4.44527  |                                                                                 |
| 16 | 50402368 | 50402885 | KD2-H4K8ac_peak_11122 | 9.36516  | BRD7_ENSG00000166164;RP11-21B23.1_ENSG00000261393                               |
| 16 | 50424171 | 50424855 | KD2-H4K8ac_peak_11123 | 8.85813  |                                                                                 |
| 16 | 50425164 | 50425546 | KD2-H4K8ac_peak_11124 | 14.00658 |                                                                                 |
| 16 | 50502281 | 50502494 | KD2-H4K8ac_peak_11125 | 9.95759  |                                                                                 |
| 16 | 50727270 | 50727664 | KD2-H4K8ac_peak_11126 | 8.55271  | NOD2_ENSG00000167207                                                            |
| 16 | 50776189 | 50776393 | KD2-H4K8ac_peak_11127 | 4.44527  | RP11-327F22.1_ENSG00000260929;CYLD_ENSG00000083799;hsa-mir-3181_ENSG00000264947 |
| 16 | 53088334 | 53088759 | KD2-H4K8ac_peak_11128 | 10.43145 | CHD9_ENSG00000177200                                                            |
| 16 | 53088985 | 53089296 | KD2-H4K8ac_peak_11129 | 7.07117  | CHD9_ENSG00000177200                                                            |
| 16 | 53114210 | 53114490 | KD2-H4K8ac_peak_11130 | 10.53377 |                                                                                 |

|    |          |          |                       |          |                                               |
|----|----------|----------|-----------------------|----------|-----------------------------------------------|
| 16 | 53118593 | 53119470 | KD2-H4K8ac_peak_11131 | 8.85813  |                                               |
| 16 | 53119892 | 53120521 | KD2-H4K8ac_peak_11132 | 8.30974  |                                               |
| 16 | 53124373 | 53124706 | KD2-H4K8ac_peak_11133 | 9.11031  |                                               |
| 16 | 53125002 | 53125446 | KD2-H4K8ac_peak_11134 | 6.54442  |                                               |
| 16 | 53126705 | 53127001 | KD2-H4K8ac_peak_11135 | 5.77029  |                                               |
| 16 | 53127953 | 53128279 | KD2-H4K8ac_peak_11136 | 7.79558  |                                               |
| 16 | 53131766 | 53132807 | KD2-H4K8ac_peak_11137 | 6.25869  |                                               |
| 16 | 53134448 | 53134721 | KD2-H4K8ac_peak_11138 | 8.09113  |                                               |
| 16 | 53163898 | 53164346 | KD2-H4K8ac_peak_11139 | 7.51054  |                                               |
| 16 | 53467849 | 53468185 | KD2-H4K8ac_peak_11140 | 6.25869  | RBL2_ENSG00000103479                          |
| 16 | 53536581 | 53537030 | KD2-H4K8ac_peak_11141 | 6.40683  |                                               |
| 16 | 53537582 | 53538473 | KD2-H4K8ac_peak_11142 | 11.95211 | AKTIP_ENSG00000166971                         |
| 16 | 53544163 | 53544444 | KD2-H4K8ac_peak_11143 | 8.17902  |                                               |
| 16 | 54096896 | 54097088 | KD2-H4K8ac_peak_11144 | 5.14125  |                                               |
| 16 | 54210334 | 54210564 | KD2-H4K8ac_peak_11145 | 5.14125  |                                               |
| 16 | 54227567 | 54227816 | KD2-H4K8ac_peak_11146 | 4.24345  |                                               |
| 16 | 54228065 | 54228735 | KD2-H4K8ac_peak_11147 | 11.89502 |                                               |
| 16 | 54311331 | 54311574 | KD2-H4K8ac_peak_11148 | 10.0692  |                                               |
| 16 | 54311884 | 54312546 | KD2-H4K8ac_peak_11149 | 7.12754  |                                               |
| 16 | 54319751 | 54320407 | KD2-H4K8ac_peak_11150 | 12.74171 | IRX3_ENSG00000177508                          |
| 16 | 54320960 | 54321396 | KD2-H4K8ac_peak_11151 | 20.30085 | IRX3_ENSG00000177508                          |
| 16 | 54962375 | 54963030 | KD2-H4K8ac_peak_11152 | 20.58734 | CRNDE_ENSG00000245694                         |
| 16 | 54964020 | 54964389 | KD2-H4K8ac_peak_11153 | 9.11031  | CRNDE_ENSG00000245694;IRX5_ENSG00000176842    |
| 16 | 54964991 | 54965481 | KD2-H4K8ac_peak_11154 | 11.2938  | IRX5_ENSG00000176842                          |
| 16 | 54966090 | 54966460 | KD2-H4K8ac_peak_11155 | 5.82869  |                                               |
| 16 | 55297100 | 55297525 | KD2-H4K8ac_peak_11156 | 12.14738 |                                               |
| 16 | 55357559 | 55358407 | KD2-H4K8ac_peak_11157 | 14.00658 | IRX6_ENSG00000159387                          |
| 16 | 55407147 | 55408004 | KD2-H4K8ac_peak_11158 | 9.1707   |                                               |
| 16 | 55413615 | 55413895 | KD2-H4K8ac_peak_11159 | 4.9025   |                                               |
| 16 | 55513178 | 55513726 | KD2-H4K8ac_peak_11160 | 9.36516  |                                               |
| 16 | 55513981 | 55514240 | KD2-H4K8ac_peak_11161 | 4.86324  |                                               |
| 16 | 55676721 | 55677276 | KD2-H4K8ac_peak_11162 | 8.51832  |                                               |
| 16 | 55684152 | 55684590 | KD2-H4K8ac_peak_11163 | 9.4551   |                                               |
| 16 | 55684974 | 55685171 | KD2-H4K8ac_peak_11164 | 8.59579  |                                               |
| 16 | 55686519 | 55686920 | KD2-H4K8ac_peak_11165 | 12.56039 |                                               |
| 16 | 55689091 | 55689634 | KD2-H4K8ac_peak_11166 | 4.8888   | SLC6A2_ENSG00000103546                        |
| 16 | 55689983 | 55690925 | KD2-H4K8ac_peak_11167 | 12.08081 | SLC6A2_ENSG00000103546                        |
| 16 | 55978434 | 55978756 | KD2-H4K8ac_peak_11168 | 6.16888  |                                               |
| 16 | 56135527 | 56135850 | KD2-H4K8ac_peak_11169 | 9.23578  |                                               |
| 16 | 56291718 | 56291954 | KD2-H4K8ac_peak_11170 | 5.45396  |                                               |
| 16 | 56292423 | 56293163 | KD2-H4K8ac_peak_11171 | 12.82393 |                                               |
| 16 | 56351876 | 56352101 | KD2-H4K8ac_peak_11172 | 6.05809  |                                               |
| 16 | 56458953 | 56459232 | KD2-H4K8ac_peak_11173 | 9.36516  | AMFR_ENSG00000159461                          |
| 16 | 56484840 | 56485201 | KD2-H4K8ac_peak_11174 | 9.1707   | NUDT21_ENSG00000167005;OGFOD1_ENSG00000087263 |
| 16 | 56485679 | 56485884 | KD2-H4K8ac_peak_11175 | 3.75035  | NUDT21_ENSG00000167005;OGFOD1_ENSG00000087263 |
| 16 | 56553586 | 56553862 | KD2-H4K8ac_peak_11176 | 10.08707 | BBS2_ENSG00000125124                          |

|    |          |          |                       |          |                                                     |
|----|----------|----------|-----------------------|----------|-----------------------------------------------------|
| 16 | 56642014 | 56642356 | KD2-H4K8ac_peak_11177 | 16.49944 | MT2A_ENSG00000125148                                |
| 16 | 56644045 | 56644237 | KD2-H4K8ac_peak_11178 | 5.53095  |                                                     |
| 16 | 56691616 | 56691825 | KD2-H4K8ac_peak_11179 | 5.57044  | MT1F_ENSG00000198417                                |
| 16 | 56715769 | 56716027 | KD2-H4K8ac_peak_11180 | 12.08081 | MT1X_ENSG00000187193;RP11-343H19.2_ENSG00000259827  |
| 16 | 56716399 | 56716716 | KD2-H4K8ac_peak_11181 | 7.76329  | MT1X_ENSG00000187193;RP11-343H19.2_ENSG00000259827  |
| 16 | 56743188 | 56743628 | KD2-H4K8ac_peak_11182 | 6.00226  |                                                     |
| 16 | 56764105 | 56764486 | KD2-H4K8ac_peak_11183 | 6.65673  | RP11-343H19.1_ENSG00000261302;NUP93_ENSG00000102900 |
| 16 | 56905242 | 56905457 | KD2-H4K8ac_peak_11184 | 4.41495  |                                                     |
| 16 | 56908030 | 56908746 | KD2-H4K8ac_peak_11185 | 8.10216  |                                                     |
| 16 | 56910053 | 56910279 | KD2-H4K8ac_peak_11186 | 7.40314  |                                                     |
| 16 | 56964703 | 56965044 | KD2-H4K8ac_peak_11187 | 4.91674  | HERPUD1_ENSG00000051108                             |
| 16 | 56965332 | 56965776 | KD2-H4K8ac_peak_11188 | 25.84576 | HERPUD1_ENSG00000051108                             |
| 16 | 56966134 | 56966684 | KD2-H4K8ac_peak_11189 | 7.74292  | HERPUD1_ENSG00000051108                             |
| 16 | 57023169 | 57023369 | KD2-H4K8ac_peak_11190 | 6.97919  | NLRC5_ENSG00000140853                               |
| 16 | 57093387 | 57093586 | KD2-H4K8ac_peak_11191 | 5.53095  | RP11-322D14.2_ENSG00000260145                       |
| 16 | 57095079 | 57095885 | KD2-H4K8ac_peak_11192 | 20.97251 |                                                     |
| 16 | 57125501 | 57125700 | KD2-H4K8ac_peak_11193 | 6.04107  | RP11-407G23.1_ENSG00000260148;CPNE2_ENSG00000140848 |
| 16 | 57125981 | 57126970 | KD2-H4K8ac_peak_11194 | 8.4716   | RP11-407G23.1_ENSG00000260148;CPNE2_ENSG00000140848 |
| 16 | 57149581 | 57149815 | KD2-H4K8ac_peak_11195 | 7.98152  |                                                     |
| 16 | 57181132 | 57181347 | KD2-H4K8ac_peak_11196 | 4.42765  |                                                     |
| 16 | 57219471 | 57219706 | KD2-H4K8ac_peak_11197 | 7.76329  | FAM192A_ENSG00000172775;RSPRY1_ENSG00000159579      |
| 16 | 57220277 | 57220698 | KD2-H4K8ac_peak_11198 | 11.89502 | FAM192A_ENSG00000172775;RSPRY1_ENSG00000159579      |
| 16 | 57279217 | 57279472 | KD2-H4K8ac_peak_11199 | 15.58442 | ARL2BP_ENSG00000102931                              |
| 16 | 57296847 | 57297248 | KD2-H4K8ac_peak_11200 | 5.54647  |                                                     |
| 16 | 57307250 | 57307476 | KD2-H4K8ac_peak_11201 | 6.37852  |                                                     |
| 16 | 57318037 | 57318703 | KD2-H4K8ac_peak_11202 | 16.822   | PLL1_ENSG00000102934                                |
| 16 | 57405262 | 57406641 | KD2-H4K8ac_peak_11203 | 12.14909 | CX3CL1_ENSG00000006210                              |
| 16 | 57450160 | 57451007 | KD2-H4K8ac_peak_11204 | 17.43561 |                                                     |
| 16 | 57453290 | 57453744 | KD2-H4K8ac_peak_11205 | 6.7498   |                                                     |
| 16 | 57480652 | 57481142 | KD2-H4K8ac_peak_11206 | 8.85813  | CIAPIN1_ENSG00000005194;COQ9_ENSG00000088682        |
| 16 | 57481446 | 57481818 | KD2-H4K8ac_peak_11207 | 12.93209 | CIAPIN1_ENSG00000005194;COQ9_ENSG00000088682        |
| 16 | 57507175 | 57507471 | KD2-H4K8ac_peak_11208 | 3.90565  |                                                     |
| 16 | 57513009 | 57513513 | KD2-H4K8ac_peak_11209 | 8.58725  |                                                     |
| 16 | 57513994 | 57515279 | KD2-H4K8ac_peak_11210 | 13.34709 |                                                     |
| 16 | 57517703 | 57517990 | KD2-H4K8ac_peak_11211 | 9.36982  |                                                     |
| 16 | 57518317 | 57518522 | KD2-H4K8ac_peak_11212 | 4.72599  |                                                     |
| 16 | 57537425 | 57537967 | KD2-H4K8ac_peak_11213 | 7.372    |                                                     |
| 16 | 57539220 | 57539437 | KD2-H4K8ac_peak_11214 | 5.40498  |                                                     |
| 16 | 57541165 | 57541570 | KD2-H4K8ac_peak_11215 | 9.20193  |                                                     |
| 16 | 57541825 | 57542778 | KD2-H4K8ac_peak_11216 | 7.28628  |                                                     |
| 16 | 57543216 | 57543763 | KD2-H4K8ac_peak_11217 | 11.02863 |                                                     |
| 16 | 57544389 | 57545023 | KD2-H4K8ac_peak_11218 | 8.23274  |                                                     |
| 16 | 57548685 | 57549184 | KD2-H4K8ac_peak_11219 | 9.06432  |                                                     |
| 16 | 57567733 | 57567947 | KD2-H4K8ac_peak_11220 | 6.08655  |                                                     |
| 16 | 57568994 | 57569231 | KD2-H4K8ac_peak_11221 | 8.26945  |                                                     |
| 16 | 57570213 | 57571116 | KD2-H4K8ac_peak_11222 | 14.95275 | CCDC102A_ENSG00000135736                            |



|    |          |          |                       |          |                                                                     |
|----|----------|----------|-----------------------|----------|---------------------------------------------------------------------|
| 16 | 57728725 | 57729063 | KD2-H4K8ac_peak_11223 | 9.11031  | CCDC135_ENSG00000159625                                             |
| 16 | 57730039 | 57730444 | KD2-H4K8ac_peak_11224 | 6.99815  |                                                                     |
| 16 | 57768396 | 57769126 | KD2-H4K8ac_peak_11225 | 15.81711 | KATNB1_ENSG00000140854                                              |
| 16 | 57836033 | 57836286 | KD2-H4K8ac_peak_11226 | 10.53377 |                                                                     |
| 16 | 57836588 | 57837471 | KD2-H4K8ac_peak_11227 | 12.88108 |                                                                     |
| 16 | 58018396 | 58018862 | KD2-H4K8ac_peak_11228 | 8.55271  |                                                                     |
| 16 | 58033880 | 58034542 | KD2-H4K8ac_peak_11229 | 7.76329  | ZNF319_ENSG00000166188;USB1_ENSG00000103005                         |
| 16 | 58034744 | 58035023 | KD2-H4K8ac_peak_11230 | 6.90231  | ZNF319_ENSG00000166188                                              |
| 16 | 58058838 | 58059547 | KD2-H4K8ac_peak_11231 | 9.2116   | MMP15_ENSG00000102996                                               |
| 16 | 58067125 | 58067468 | KD2-H4K8ac_peak_11232 | 7.48958  |                                                                     |
| 16 | 58069140 | 58069359 | KD2-H4K8ac_peak_11233 | 5.07021  |                                                                     |
| 16 | 58163827 | 58164118 | KD2-H4K8ac_peak_11234 | 10.87093 | C16orf80_ENSG00000070761;RP11-459F6.3_ENSG00000260927               |
| 16 | 58231395 | 58231589 | KD2-H4K8ac_peak_11235 | 7.67504  | CSNK2A2_ENSG00000070770;RP11-459F6.1_ENSG00000260867                |
| 16 | 58232237 | 58232555 | KD2-H4K8ac_peak_11236 | 11.05467 | CSNK2A2_ENSG00000070770                                             |
| 16 | 58270032 | 58270434 | KD2-H4K8ac_peak_11237 | 12.42761 |                                                                     |
| 16 | 58283908 | 58284108 | KD2-H4K8ac_peak_11238 | 6.13909  |                                                                     |
| 16 | 58426136 | 58426972 | KD2-H4K8ac_peak_11239 | 10.43145 |                                                                     |
| 16 | 58497012 | 58497682 | KD2-H4K8ac_peak_11240 | 6.55628  | NDRG4_ENSG00000103034                                               |
| 16 | 58497908 | 58498116 | KD2-H4K8ac_peak_11241 | 7.07117  |                                                                     |
| 16 | 58527351 | 58527981 | KD2-H4K8ac_peak_11242 | 5.85704  |                                                                     |
| 16 | 58533154 | 58533703 | KD2-H4K8ac_peak_11243 | 6.99815  |                                                                     |
| 16 | 58535472 | 58535690 | KD2-H4K8ac_peak_11244 | 5.66705  |                                                                     |
| 16 | 58548925 | 58549220 | KD2-H4K8ac_peak_11245 | 9.73431  | SETD6_ENSG00000103037                                               |
| 16 | 58549468 | 58549964 | KD2-H4K8ac_peak_11246 | 9.95119  | SETD6_ENSG00000103037                                               |
| 16 | 58663167 | 58663714 | KD2-H4K8ac_peak_11247 | 9.95119  | CNOT1_ENSG00000125107                                               |
| 16 | 58664121 | 58664870 | KD2-H4K8ac_peak_11248 | 8.55271  | CNOT1_ENSG00000125107                                               |
| 16 | 58718117 | 58718567 | KD2-H4K8ac_peak_11249 | 10.19949 | SLC38A7_ENSG00000103042                                             |
| 16 | 58718773 | 58719067 | KD2-H4K8ac_peak_11250 | 9.72244  | SLC38A7_ENSG00000103042                                             |
| 16 | 58767646 | 58768058 | KD2-H4K8ac_peak_11251 | 7.76104  | GOT2_ENSG00000125166;RP11-410D17.2_ENSG00000245768                  |
| 16 | 58768398 | 58768892 | KD2-H4K8ac_peak_11252 | 9.3973   | GOT2_ENSG00000125166;RP11-410D17.2_ENSG00000245768                  |
| 16 | 64649656 | 64649851 | KD2-H4K8ac_peak_11253 | 4.01115  |                                                                     |
| 16 | 65156145 | 65157017 | KD2-H4K8ac_peak_11254 | 12.42761 |                                                                     |
| 16 | 65157265 | 65157946 | KD2-H4K8ac_peak_11255 | 11.89502 |                                                                     |
| 16 | 65690404 | 65690776 | KD2-H4K8ac_peak_11256 | 5.15777  |                                                                     |
| 16 | 65696761 | 65697023 | KD2-H4K8ac_peak_11257 | 9.76452  |                                                                     |
| 16 | 65789600 | 65789817 | KD2-H4K8ac_peak_11258 | 5.47943  |                                                                     |
| 16 | 65910836 | 65911035 | KD2-H4K8ac_peak_11259 | 4.37708  |                                                                     |
| 16 | 66223068 | 66223606 | KD2-H4K8ac_peak_11260 | 4.77079  |                                                                     |
| 16 | 66304212 | 66304728 | KD2-H4K8ac_peak_11261 | 15.74662 |                                                                     |
| 16 | 66442375 | 66442860 | KD2-H4K8ac_peak_11262 | 5.88845  | LINC00920_ENSG00000246898                                           |
| 16 | 66550821 | 66551525 | KD2-H4K8ac_peak_11263 | 8.00457  | RP11-403P17.5_ENSG00000260851                                       |
| 16 | 66583181 | 66584219 | KD2-H4K8ac_peak_11264 | 20.88898 | Y_RNA_ENSG00000261519                                               |
| 16 | 66585904 | 66586382 | KD2-H4K8ac_peak_11265 | 14.80472 | TK2_ENSG00000166548;CKLF_ENSG00000217555;CKLF-CMTM1_ENSG00000254788 |
| 16 | 66586576 | 66586955 | KD2-H4K8ac_peak_11266 | 9.36516  | TK2_ENSG00000166548;CKLF_ENSG00000217555;CKLF-CMTM1_ENSG00000254788 |
| 16 | 66624916 | 66625117 | KD2-H4K8ac_peak_11267 | 5.64449  |                                                                     |
| 16 | 66637585 | 66637945 | KD2-H4K8ac_peak_11268 | 5.14125  | CMTM3_ENSG00000140931                                               |

|    |          |          |                       |          |                                                                                  |
|----|----------|----------|-----------------------|----------|----------------------------------------------------------------------------------|
| 16 | 66638139 | 66638388 | KD2-H4K8ac_peak_11269 | 7.76329  | CMTM3_ENSG00000140931                                                            |
| 16 | 66638640 | 66639565 | KD2-H4K8ac_peak_11270 | 7.36799  | CMTM3_ENSG00000140931                                                            |
| 16 | 66729997 | 66730392 | KD2-H4K8ac_peak_11271 | 6.25869  | CMTM4_ENSG00000183723                                                            |
| 16 | 66785079 | 66785919 | KD2-H4K8ac_peak_11272 | 5.9696   | DYNC1LI2_ENSG00000135720;RP11-61A14.4_ENSG00000246777                            |
| 16 | 66863672 | 66863949 | KD2-H4K8ac_peak_11273 | 4.77079  |                                                                                  |
| 16 | 66864404 | 66864783 | KD2-H4K8ac_peak_11274 | 12.30509 |                                                                                  |
| 16 | 66906814 | 66907084 | KD2-H4K8ac_peak_11275 | 7.36799  | NAE1_ENSG00000159593                                                             |
| 16 | 66913533 | 66914262 | KD2-H4K8ac_peak_11276 | 16.49944 |                                                                                  |
| 16 | 66914588 | 66914980 | KD2-H4K8ac_peak_11277 | 3.86308  |                                                                                  |
| 16 | 66933345 | 66933632 | KD2-H4K8ac_peak_11278 | 7.36799  |                                                                                  |
| 16 | 66934021 | 66934472 | KD2-H4K8ac_peak_11279 | 7.76329  |                                                                                  |
| 16 | 66967845 | 66968193 | KD2-H4K8ac_peak_11280 | 7.76329  | FAM96B_ENSG00000166595;CES2_ENSG00000172831                                      |
| 16 | 66995172 | 66995586 | KD2-H4K8ac_peak_11281 | 13.9234  | CES3_ENSG00000172828                                                             |
| 16 | 67034422 | 67034826 | KD2-H4K8ac_peak_11282 | 15.53798 |                                                                                  |
| 16 | 67047087 | 67048374 | KD2-H4K8ac_peak_11283 | 10.7186  |                                                                                  |
| 16 | 67052232 | 67052434 | KD2-H4K8ac_peak_11284 | 5.54647  | RN7SL543P_ENSG00000265918                                                        |
| 16 | 67062397 | 67062844 | KD2-H4K8ac_peak_11285 | 9.1707   | CBFB_ENSG00000067955                                                             |
| 16 | 67063113 | 67063615 | KD2-H4K8ac_peak_11286 | 11.92978 | CBFB_ENSG00000067955                                                             |
| 16 | 67109775 | 67109984 | KD2-H4K8ac_peak_11287 | 4.01115  |                                                                                  |
| 16 | 67140692 | 67141023 | KD2-H4K8ac_peak_11288 | 8.23274  |                                                                                  |
| 16 | 67143163 | 67143579 | KD2-H4K8ac_peak_11289 | 7.76104  | C16orf70_ENSG00000125149                                                         |
| 16 | 67183959 | 67185108 | KD2-H4K8ac_peak_11290 | 9.06369  | B3GNT9_ENSG00000237172                                                           |
| 16 | 67185383 | 67185668 | KD2-H4K8ac_peak_11291 | 6.60096  | B3GNT9_ENSG00000237172                                                           |
| 16 | 67193306 | 67193668 | KD2-H4K8ac_peak_11292 | 6.25225  | TRADD_ENSG00000102871;FBXL8_ENSG00000135722                                      |
| 16 | 67195078 | 67195323 | KD2-H4K8ac_peak_11293 | 5.9696   | TRADD_ENSG00000102871                                                            |
| 16 | 67196696 | 67197153 | KD2-H4K8ac_peak_11294 | 15.96909 | HSF4_ENSG00000102878;RP11-5A19.5_ENSG00000265690                                 |
| 16 | 67197718 | 67198401 | KD2-H4K8ac_peak_11295 | 11.04256 | HSF4_ENSG00000102878;RP11-5A19.5_ENSG00000265690                                 |
| 16 | 67198694 | 67198991 | KD2-H4K8ac_peak_11296 | 5.30799  |                                                                                  |
| 16 | 67203575 | 67204291 | KD2-H4K8ac_peak_11297 | 8.55581  | NOL3_ENSG00000140939                                                             |
| 16 | 67208355 | 67209226 | KD2-H4K8ac_peak_11298 | 12.08081 |                                                                                  |
| 16 | 67217642 | 67217891 | KD2-H4K8ac_peak_11299 | 21.52156 | KIAA0895L_ENSG00000196123                                                        |
| 16 | 67226225 | 67226432 | KD2-H4K8ac_peak_11300 | 6.0605   | E2F4_ENSG00000205250                                                             |
| 16 | 67261077 | 67261363 | KD2-H4K8ac_peak_11301 | 5.30799  | LRRC29_ENSG00000125122;AC040160.1_ENSG00000237102;TMEM208_ENSG00000168701        |
| 16 | 67279250 | 67280644 | KD2-H4K8ac_peak_11302 | 8.55271  | FHOD1_ENSG00000135723                                                            |
| 16 | 67282090 | 67283350 | KD2-H4K8ac_peak_11303 | 17.70889 | FHOD1_ENSG00000135723                                                            |
| 16 | 67312792 | 67313901 | KD2-H4K8ac_peak_11304 | 12.57297 |                                                                                  |
| 16 | 67360231 | 67360641 | KD2-H4K8ac_peak_11305 | 11.50346 | KCTD19_ENSG00000168676;LRRC36_ENSG00000159708                                    |
| 16 | 67361001 | 67361264 | KD2-H4K8ac_peak_11306 | 9.73163  | KCTD19_ENSG00000168676;LRRC36_ENSG00000159708                                    |
| 16 | 67429942 | 67430271 | KD2-H4K8ac_peak_11307 | 11.43863 |                                                                                  |
| 16 | 67430539 | 67430863 | KD2-H4K8ac_peak_11308 | 8.73351  |                                                                                  |
| 16 | 67450003 | 67451241 | KD2-H4K8ac_peak_11309 | 14.80472 | ZDHHC1_ENSG00000159714                                                           |
| 16 | 67515350 | 67516443 | KD2-H4K8ac_peak_11310 | 7.95563  | ATP6V0D1_ENSG00000159720;RP11-297D21.4_ENSG00000270049                           |
| 16 | 67562371 | 67563583 | KD2-H4K8ac_peak_11311 | 15.9754  |                                                                                  |
| 16 | 67564329 | 67564845 | KD2-H4K8ac_peak_11312 | 13.31016 |                                                                                  |
| 16 | 67572424 | 67572651 | KD2-H4K8ac_peak_11313 | 5.51783  |                                                                                  |
| 16 | 67596465 | 67597395 | KD2-H4K8ac_peak_11314 | 11.24702 | CTD-2012K14.6_ENSG00000261386;CTD-2012K14.7_ENSG00000259804;CTCF_ENSG00000102974 |

|    |          |          |                       |          |                                                     |
|----|----------|----------|-----------------------|----------|-----------------------------------------------------|
| 16 | 67678809 | 67679528 | KD2-H4K8ac_peak_11315 | 12.30509 | RLTPR_ENSG00000159753                               |
| 16 | 67694385 | 67694638 | KD2-H4K8ac_peak_11316 | 10.05606 | ACD_ENSG00000102977;PARD6A_ENSG00000102981          |
| 16 | 67700072 | 67700498 | KD2-H4K8ac_peak_11317 | 6.65673  | ENKD1_ENSG00000124074;C16orf86_ENSG00000159761      |
| 16 | 67700867 | 67701490 | KD2-H4K8ac_peak_11318 | 6.24114  | ENKD1_ENSG00000124074;C16orf86_ENSG00000159761      |
| 16 | 67840049 | 67840400 | KD2-H4K8ac_peak_11319 | 8.4716   | RANBP10_ENSG00000141084;TSNAXIP1_ENSG00000102904    |
| 16 | 67867893 | 67868096 | KD2-H4K8ac_peak_11320 | 7.93362  |                                                     |
| 16 | 67875954 | 67876780 | KD2-H4K8ac_peak_11321 | 12.70959 | THAP11_ENSG00000168286                              |
| 16 | 67880114 | 67880551 | KD2-H4K8ac_peak_11322 | 11.89502 | NUTF2_ENSG00000102898                               |
| 16 | 67907022 | 67907648 | KD2-H4K8ac_peak_11323 | 14.68449 | EDC4_ENSG00000038358                                |
| 16 | 67927224 | 67927784 | KD2-H4K8ac_peak_11324 | 12.30509 | PSKH1_ENSG00000159792                               |
| 16 | 67969828 | 67970053 | KD2-H4K8ac_peak_11325 | 11.92978 | CTC-479C5.12_ENSG00000261884;PSMB10_ENSG00000205220 |
| 16 | 67970391 | 67970733 | KD2-H4K8ac_peak_11326 | 6.76298  | CTC-479C5.12_ENSG00000261884;PSMB10_ENSG00000205220 |
| 16 | 68002070 | 68002442 | KD2-H4K8ac_peak_11327 | 6.30229  |                                                     |
| 16 | 68002725 | 68003097 | KD2-H4K8ac_peak_11328 | 7.36799  | SLC12A4_ENSG00000124067                             |
| 16 | 68026905 | 68027684 | KD2-H4K8ac_peak_11329 | 18.37277 |                                                     |
| 16 | 68056728 | 68057297 | KD2-H4K8ac_peak_11330 | 11.90231 | DDX28_ENSG00000182810                               |
| 16 | 68117911 | 68119042 | KD2-H4K8ac_peak_11331 | 29.13005 | NFATC3_ENSG00000072736                              |
| 16 | 68119544 | 68119965 | KD2-H4K8ac_peak_11332 | 5.57044  | NFATC3_ENSG00000072736                              |
| 16 | 68232582 | 68232823 | KD2-H4K8ac_peak_11333 | 4.49837  | RP11-96D1.9_ENSG00000262514                         |
| 16 | 68271150 | 68271351 | KD2-H4K8ac_peak_11334 | 8.16906  | ESRP2_ENSG00000103067;RP11-96D1.6_ENSG00000261469   |
| 16 | 68271821 | 68272077 | KD2-H4K8ac_peak_11335 | 5.38581  | ESRP2_ENSG00000103067;RP11-96D1.6_ENSG00000261469   |
| 16 | 68297758 | 68298661 | KD2-H4K8ac_peak_11336 | 9.63487  | SLC7A6_ENSG00000103064                              |
| 16 | 68344237 | 68344748 | KD2-H4K8ac_peak_11337 | 6.52179  | SLC7A6OS_ENSG00000103061;PRMT7_ENSG00000132600      |
| 16 | 68440675 | 68440899 | KD2-H4K8ac_peak_11338 | 8.23274  |                                                     |
| 16 | 68554404 | 68554901 | KD2-H4K8ac_peak_11339 | 5.54647  |                                                     |
| 16 | 68563242 | 68563436 | KD2-H4K8ac_peak_11340 | 4.3015   | ZFP90_ENSG00000184939                               |
| 16 | 68563685 | 68564481 | KD2-H4K8ac_peak_11341 | 11.92978 | ZFP90_ENSG00000184939                               |
| 16 | 68573228 | 68574281 | KD2-H4K8ac_peak_11342 | 12.74171 |                                                     |
| 16 | 68806565 | 68806779 | KD2-H4K8ac_peak_11343 | 5.71749  |                                                     |
| 16 | 68877437 | 68877892 | KD2-H4K8ac_peak_11344 | 10.96455 | TANGO6_ENSG00000103047                              |
| 16 | 69123454 | 69123976 | KD2-H4K8ac_peak_11345 | 5.71749  |                                                     |
| 16 | 69165714 | 69166051 | KD2-H4K8ac_peak_11346 | 9.57101  | CHTF8_ENSG00000168802;CIRH1A_ENSG00000141076        |
| 16 | 69166274 | 69166765 | KD2-H4K8ac_peak_11347 | 12.70959 | CHTF8_ENSG00000168802                               |
| 16 | 69221129 | 69221573 | KD2-H4K8ac_peak_11348 | 8.55271  | SNTB2_ENSG00000168807                               |
| 16 | 69345370 | 69345722 | KD2-H4K8ac_peak_11349 | 7.76104  | VPS4A_ENSG00000132612                               |
| 16 | 69363930 | 69364389 | KD2-H4K8ac_peak_11350 | 6.40297  | PDF_ENSG00000258429                                 |
| 16 | 69364729 | 69364961 | KD2-H4K8ac_peak_11351 | 10.96455 | PDF_ENSG00000258429                                 |
| 16 | 69372720 | 69373412 | KD2-H4K8ac_peak_11352 | 4.44527  | COG8_ENSG00000213380;NIP7_ENSG00000132603           |
| 16 | 69373727 | 69374357 | KD2-H4K8ac_peak_11353 | 7.76104  | COG8_ENSG00000213380;NIP7_ENSG00000132603           |
| 16 | 69419284 | 69420424 | KD2-H4K8ac_peak_11354 | 15.82743 |                                                     |
| 16 | 69430259 | 69430482 | KD2-H4K8ac_peak_11355 | 6.40683  |                                                     |
| 16 | 69458696 | 69458896 | KD2-H4K8ac_peak_11356 | 4.8485   | CYB5B_ENSG00000103018                               |
| 16 | 69529573 | 69529912 | KD2-H4K8ac_peak_11357 | 7.07117  |                                                     |
| 16 | 69530242 | 69530541 | KD2-H4K8ac_peak_11358 | 8.42997  |                                                     |
| 16 | 69599389 | 69599644 | KD2-H4K8ac_peak_11359 | 18.24798 | NFAT5_ENSG00000102908;MIR1538_ENSG00000223109       |
| 16 | 69599944 | 69600171 | KD2-H4K8ac_peak_11360 | 8.52559  | NFAT5_ENSG00000102908;MIR1538_ENSG00000223109       |

|    |          |          |                       |          |                                                     |
|----|----------|----------|-----------------------|----------|-----------------------------------------------------|
| 16 | 69760020 | 69760213 | KD2-H4K8ac_peak_11361 | 5.9696   | NQO1_ENSG00000181019;CTD-2033A16.3_ENSG00000262136  |
| 16 | 69760679 | 69760883 | KD2-H4K8ac_peak_11362 | 7.92775  | NQO1_ENSG00000181019;CTD-2033A16.3_ENSG00000262136  |
| 16 | 69761169 | 69761433 | KD2-H4K8ac_peak_11363 | 8.83582  | NQO1_ENSG00000181019;CTD-2033A16.3_ENSG00000262136  |
| 16 | 69788419 | 69788753 | KD2-H4K8ac_peak_11364 | 11.30637 | NOB1_ENSG00000141101                                |
| 16 | 69795892 | 69796231 | KD2-H4K8ac_peak_11365 | 6.2159   | WWP2_ENSG00000198373                                |
| 16 | 69796447 | 69796895 | KD2-H4K8ac_peak_11366 | 12.06346 | WWP2_ENSG00000198373                                |
| 16 | 69855186 | 69855473 | KD2-H4K8ac_peak_11367 | 5.75757  |                                                     |
| 16 | 69864399 | 69864945 | KD2-H4K8ac_peak_11368 | 11.05407 |                                                     |
| 16 | 69865844 | 69866037 | KD2-H4K8ac_peak_11369 | 6.66692  |                                                     |
| 16 | 69866633 | 69867025 | KD2-H4K8ac_peak_11370 | 7.27716  |                                                     |
| 16 | 69867901 | 69868245 | KD2-H4K8ac_peak_11371 | 6.65673  |                                                     |
| 16 | 69923846 | 69924947 | KD2-H4K8ac_peak_11372 | 14.15075 |                                                     |
| 16 | 70147855 | 70148052 | KD2-H4K8ac_peak_11373 | 6.66692  | PDPR_ENSG00000090857                                |
| 16 | 70285441 | 70285779 | KD2-H4K8ac_peak_11374 | 8.83582  | EXOSC6_ENSG00000223496                              |
| 16 | 70322551 | 70322914 | KD2-H4K8ac_peak_11375 | 5.55317  | AARS_ENSG00000090861;DDX19B_ENSG00000157349         |
| 16 | 70323825 | 70324556 | KD2-H4K8ac_peak_11376 | 8.30974  | AARS_ENSG00000090861;DDX19B_ENSG00000157349         |
| 16 | 70333249 | 70333609 | KD2-H4K8ac_peak_11377 | 4.86324  | RP11-529K1.3_ENSG00000260537                        |
| 16 | 70380249 | 70380548 | KD2-H4K8ac_peak_11378 | 8.10216  | RP11-529K1.2_ENSG00000261777;DDX19A_ENSG00000168872 |
| 16 | 70414293 | 70415144 | KD2-H4K8ac_peak_11379 | 15.61313 | RP11-529K1.4_ENSG00000260111                        |
| 16 | 70415601 | 70415827 | KD2-H4K8ac_peak_11380 | 6.84261  |                                                     |
| 16 | 70461865 | 70462132 | KD2-H4K8ac_peak_11381 | 9.11031  |                                                     |
| 16 | 70463061 | 70463381 | KD2-H4K8ac_peak_11382 | 8.17902  |                                                     |
| 16 | 70463709 | 70464031 | KD2-H4K8ac_peak_11383 | 4.86324  |                                                     |
| 16 | 70473353 | 70473697 | KD2-H4K8ac_peak_11384 | 9.6247   | ST3GAL2_ENSG00000157350                             |
| 16 | 70488323 | 70488955 | KD2-H4K8ac_peak_11385 | 10.66719 | FUK_ENSG00000157353                                 |
| 16 | 70557792 | 70558174 | KD2-H4K8ac_peak_11386 | 9.1707   | COG4_ENSG00000103051;SF3B3_ENSG00000189091          |
| 16 | 70720038 | 70720564 | KD2-H4K8ac_peak_11387 | 11.3394  | MTSS1L_ENSG00000132613                              |
| 16 | 70725557 | 70725809 | KD2-H4K8ac_peak_11388 | 7.95563  |                                                     |
| 16 | 70729637 | 70730094 | KD2-H4K8ac_peak_11389 | 9.13143  |                                                     |
| 16 | 70736891 | 70737834 | KD2-H4K8ac_peak_11390 | 6.53538  |                                                     |
| 16 | 70747314 | 70747566 | KD2-H4K8ac_peak_11391 | 10.01478 |                                                     |
| 16 | 70748753 | 70748998 | KD2-H4K8ac_peak_11392 | 8.55271  |                                                     |
| 16 | 70750178 | 70750856 | KD2-H4K8ac_peak_11393 | 6.92624  |                                                     |
| 16 | 70770983 | 70771221 | KD2-H4K8ac_peak_11394 | 5.4779   |                                                     |
| 16 | 70771795 | 70772455 | KD2-H4K8ac_peak_11395 | 8.21852  |                                                     |
| 16 | 70834497 | 70834969 | KD2-H4K8ac_peak_11396 | 10.87093 | VAC14_ENSG00000103043                               |
| 16 | 71264690 | 71265107 | KD2-H4K8ac_peak_11397 | 7.12754  | HYDIN_ENSG00000157423                               |
| 16 | 71322899 | 71323238 | KD2-H4K8ac_peak_11398 | 10.05606 | CMTR2_ENSG00000180917                               |
| 16 | 71323553 | 71323818 | KD2-H4K8ac_peak_11399 | 7.22457  | CMTR2_ENSG00000180917                               |
| 16 | 71495640 | 71496411 | KD2-H4K8ac_peak_11400 | 11.55163 | ZNF23_ENSG00000167377;RP11-510M2.2_ENSG00000247324  |
| 16 | 71518043 | 71518800 | KD2-H4K8ac_peak_11401 | 20.88898 |                                                     |
| 16 | 71598974 | 71599386 | KD2-H4K8ac_peak_11402 | 6.04107  | RP11-432I5.1_ENSG00000260886;ZNF19_ENSG00000157429  |
| 16 | 71757947 | 71758156 | KD2-H4K8ac_peak_11403 | 9.1707   | PHLPP2_ENSG00000040199;RP11-432I5.8_ENSG00000261513 |
| 16 | 71842379 | 71842787 | KD2-H4K8ac_peak_11404 | 8.30974  | AP1G1_ENSG00000166747                               |
| 16 | 71843195 | 71843541 | KD2-H4K8ac_peak_11405 | 10.58496 | AP1G1_ENSG00000166747                               |
| 16 | 71879272 | 71879690 | KD2-H4K8ac_peak_11406 | 6.66359  | ATXN1L_ENSG00000224470;IST1_ENSG00000182149         |

|    |          |          |                       |          |                                                             |
|----|----------|----------|-----------------------|----------|-------------------------------------------------------------|
| 16 | 71917504 | 71918006 | KD2-H4K8ac_peak_11407 | 16.86242 |                                                             |
| 16 | 71918969 | 71919292 | KD2-H4K8ac_peak_11408 | 5.13893  |                                                             |
| 16 | 71928903 | 71929243 | KD2-H4K8ac_peak_11409 | 10.21366 | ZNF821_ENSG00000102984                                      |
| 16 | 71929455 | 71929888 | KD2-H4K8ac_peak_11410 | 15.13261 | ZNF821_ENSG00000102984                                      |
| 16 | 72041899 | 72042173 | KD2-H4K8ac_peak_11411 | 8.1718   | DHODH_ENSG00000102967                                       |
| 16 | 72127208 | 72127458 | KD2-H4K8ac_peak_11412 | 14.84212 | TXNL4B_ENSG00000140830;DHX38_ENSG00000140829                |
| 16 | 72127934 | 72128186 | KD2-H4K8ac_peak_11413 | 5.13615  | TXNL4B_ENSG00000140830;DHX38_ENSG00000140829                |
| 16 | 72158566 | 72158930 | KD2-H4K8ac_peak_11414 | 10.53596 |                                                             |
| 16 | 72229604 | 72229802 | KD2-H4K8ac_peak_11415 | 6.00226  |                                                             |
| 16 | 72231306 | 72231983 | KD2-H4K8ac_peak_11416 | 9.95119  |                                                             |
| 16 | 72232332 | 72232662 | KD2-H4K8ac_peak_11417 | 10.72656 |                                                             |
| 16 | 72233008 | 72233491 | KD2-H4K8ac_peak_11418 | 6.84261  |                                                             |
| 16 | 72233855 | 72234519 | KD2-H4K8ac_peak_11419 | 10.0692  |                                                             |
| 16 | 72698309 | 72698768 | KD2-H4K8ac_peak_11420 | 5.88845  | AC004158.2_ENSG00000261008;RP5-991G20.1_ENSG00000259768     |
| 16 | 72867054 | 72867287 | KD2-H4K8ac_peak_11421 | 4.81242  |                                                             |
| 16 | 73081605 | 73081955 | KD2-H4K8ac_peak_11422 | 11.03331 |                                                             |
| 16 | 73082257 | 73082559 | KD2-H4K8ac_peak_11423 | 6.66692  |                                                             |
| 16 | 73087229 | 73087649 | KD2-H4K8ac_peak_11424 | 10.29344 |                                                             |
| 16 | 73091421 | 73091977 | KD2-H4K8ac_peak_11425 | 16.79606 |                                                             |
| 16 | 73092183 | 73093033 | KD2-H4K8ac_peak_11426 | 9.36516  | ZFH33_ENSG00000140836                                       |
| 16 | 73096897 | 73097199 | KD2-H4K8ac_peak_11427 | 7.76329  |                                                             |
| 16 | 73105441 | 73105901 | KD2-H4K8ac_peak_11428 | 6.65673  |                                                             |
| 16 | 73204331 | 73204551 | KD2-H4K8ac_peak_11429 | 5.4779   |                                                             |
| 16 | 73205619 | 73206393 | KD2-H4K8ac_peak_11430 | 10.53377 |                                                             |
| 16 | 73207430 | 73207716 | KD2-H4K8ac_peak_11431 | 7.62364  |                                                             |
| 16 | 73218267 | 73218569 | KD2-H4K8ac_peak_11432 | 7.47462  |                                                             |
| 16 | 73337965 | 73338295 | KD2-H4K8ac_peak_11433 | 6.25869  |                                                             |
| 16 | 74330751 | 74331484 | KD2-H4K8ac_peak_11434 | 12.93209 | AC009120.4_ENSG00000261404;PSMD7_ENSG00000103035            |
| 16 | 74401585 | 74402013 | KD2-H4K8ac_peak_11435 | 4.44527  | RP11-252A24.2_ENSG00000214331;RP11-252A24.3_ENSG00000261079 |
| 16 | 74430435 | 74430690 | KD2-H4K8ac_peak_11436 | 7.76329  |                                                             |
| 16 | 74640444 | 74640963 | KD2-H4K8ac_peak_11437 | 14.00658 |                                                             |
| 16 | 74700323 | 74700716 | KD2-H4K8ac_peak_11438 | 12.42761 | RFWD3_ENSG00000168411;RP11-144N1.1_ENSG00000262904          |
| 16 | 74776036 | 74776230 | KD2-H4K8ac_peak_11439 | 4.57371  |                                                             |
| 16 | 74808269 | 74808639 | KD2-H4K8ac_peak_11440 | 8.74596  | FA2H_ENSG00000103089                                        |
| 16 | 75019361 | 75019796 | KD2-H4K8ac_peak_11441 | 6.66692  |                                                             |
| 16 | 75032997 | 75033343 | KD2-H4K8ac_peak_11442 | 16.8435  | WDR59_ENSG00000103091;ZNR11_ENSG00000186187                 |
| 16 | 75100533 | 75100735 | KD2-H4K8ac_peak_11443 | 8.00457  |                                                             |
| 16 | 75103241 | 75103480 | KD2-H4K8ac_peak_11444 | 10.73467 |                                                             |
| 16 | 75182482 | 75182827 | KD2-H4K8ac_peak_11445 | 7.11824  | ZFP1_ENSG00000184517                                        |
| 16 | 75232106 | 75232440 | KD2-H4K8ac_peak_11446 | 4.01115  |                                                             |
| 16 | 75232817 | 75233315 | KD2-H4K8ac_peak_11447 | 6.07178  |                                                             |
| 16 | 75273614 | 75274016 | KD2-H4K8ac_peak_11448 | 4.68541  |                                                             |
| 16 | 75297869 | 75298160 | KD2-H4K8ac_peak_11449 | 6.53538  |                                                             |
| 16 | 75299316 | 75299669 | KD2-H4K8ac_peak_11450 | 7.146    |                                                             |
| 16 | 75300036 | 75300694 | KD2-H4K8ac_peak_11451 | 19.93398 |                                                             |
| 16 | 75331306 | 75331599 | KD2-H4K8ac_peak_11452 | 7.94441  |                                                             |

|    |          |          |                       |          |                                                        |
|----|----------|----------|-----------------------|----------|--------------------------------------------------------|
| 16 | 75455071 | 75455292 | KD2-H4K8ac_peak_11453 | 9.07071  |                                                        |
| 16 | 75466968 | 75467371 | KD2-H4K8ac_peak_11454 | 17.17257 | CFDP1_ENSG00000153774                                  |
| 16 | 75467738 | 75468048 | KD2-H4K8ac_peak_11455 | 8.00457  | CFDP1_ENSG00000153774                                  |
| 16 | 75478009 | 75478239 | KD2-H4K8ac_peak_11456 | 4.77079  |                                                        |
| 16 | 75497908 | 75498496 | KD2-H4K8ac_peak_11457 | 8.88082  | RP11-77K12.1_ENSG00000261717;TMEM170A_ENSG00000166822  |
| 16 | 75550656 | 75551140 | KD2-H4K8ac_peak_11458 | 17.46525 | RP11-77K12.5_ENSG00000262583                           |
| 16 | 75590496 | 75590804 | KD2-H4K8ac_peak_11459 | 5.14125  | TMEM231_ENSG00000205084                                |
| 16 | 75655889 | 75656115 | KD2-H4K8ac_peak_11460 | 5.40638  |                                                        |
| 16 | 75656702 | 75657060 | KD2-H4K8ac_peak_11461 | 6.13909  | ADAT1_ENSG00000065457                                  |
| 16 | 75681292 | 75681515 | KD2-H4K8ac_peak_11462 | 7.76329  | TERF2IP_ENSG00000166848                                |
| 16 | 75682312 | 75682962 | KD2-H4K8ac_peak_11463 | 8.82366  | KARS_ENSG00000065427;TERF2IP_ENSG00000166848           |
| 16 | 77224152 | 77224551 | KD2-H4K8ac_peak_11464 | 19.91242 | MON1B_ENSG00000103111                                  |
| 16 | 77245788 | 77246064 | KD2-H4K8ac_peak_11465 | 6.54442  |                                                        |
| 16 | 77246319 | 77246800 | KD2-H4K8ac_peak_11466 | 7.13615  |                                                        |
| 16 | 77787593 | 77787827 | KD2-H4K8ac_peak_11467 | 6.16888  |                                                        |
| 16 | 77797963 | 77798203 | KD2-H4K8ac_peak_11468 | 4.14296  |                                                        |
| 16 | 78132484 | 78132831 | KD2-H4K8ac_peak_11469 | 8.28994  | WVOX_ENSG00000186153                                   |
| 16 | 78133590 | 78133965 | KD2-H4K8ac_peak_11470 | 10.05606 | WVOX_ENSG00000186153                                   |
| 16 | 78602489 | 78602690 | KD2-H4K8ac_peak_11471 | 6.07178  |                                                        |
| 16 | 79804074 | 79804381 | KD2-H4K8ac_peak_11472 | 9.59147  | RP11-345M22.2_ENSG00000261390                          |
| 16 | 79872380 | 79872580 | KD2-H4K8ac_peak_11473 | 8.00457  |                                                        |
| 16 | 80574978 | 80575333 | KD2-H4K8ac_peak_11474 | 6.0073   | DYNLRB2_ENSG00000168589                                |
| 16 | 80934185 | 80934703 | KD2-H4K8ac_peak_11475 | 5.55317  |                                                        |
| 16 | 81040153 | 81040756 | KD2-H4K8ac_peak_11476 | 9.63487  | CENPN_ENSG00000166451                                  |
| 16 | 81069506 | 81070018 | KD2-H4K8ac_peak_11477 | 10.72656 | RP11-303E16.3_ENSG00000260213;ATMIN_ENSG00000166454    |
| 16 | 81110968 | 81111324 | KD2-H4K8ac_peak_11478 | 7.76104  | C16orf46_ENSG00000166455;RP11-303E16.7_ENSG00000245059 |
| 16 | 81130390 | 81130722 | KD2-H4K8ac_peak_11479 | 4.03256  | GCSH_ENSG00000140905                                   |
| 16 | 81348661 | 81349358 | KD2-H4K8ac_peak_11480 | 10.87093 | GAN_ENSG00000261609                                    |
| 16 | 81437522 | 81437883 | KD2-H4K8ac_peak_11481 | 9.65086  |                                                        |
| 16 | 81465454 | 81465996 | KD2-H4K8ac_peak_11482 | 5.46431  |                                                        |
| 16 | 81477713 | 81478029 | KD2-H4K8ac_peak_11483 | 9.1707   | CMIP_ENSG00000153815                                   |
| 16 | 81478569 | 81478864 | KD2-H4K8ac_peak_11484 | 10.82243 | CMIP_ENSG00000153815                                   |
| 16 | 81520984 | 81521233 | KD2-H4K8ac_peak_11485 | 6.0073   |                                                        |
| 16 | 81547891 | 81548862 | KD2-H4K8ac_peak_11486 | 8.93255  |                                                        |
| 16 | 81549086 | 81550074 | KD2-H4K8ac_peak_11487 | 14.68449 |                                                        |
| 16 | 81552717 | 81553169 | KD2-H4K8ac_peak_11488 | 6.36375  |                                                        |
| 16 | 81572928 | 81573307 | KD2-H4K8ac_peak_11489 | 6.2781   |                                                        |
| 16 | 81643465 | 81644367 | KD2-H4K8ac_peak_11490 | 7.67496  |                                                        |
| 16 | 81658691 | 81658923 | KD2-H4K8ac_peak_11491 | 5.57044  |                                                        |
| 16 | 81702037 | 81702339 | KD2-H4K8ac_peak_11492 | 4.86324  |                                                        |
| 16 | 81763102 | 81763332 | KD2-H4K8ac_peak_11493 | 8.09472  |                                                        |
| 16 | 81763526 | 81764017 | KD2-H4K8ac_peak_11494 | 12.88108 |                                                        |
| 16 | 81764214 | 81764540 | KD2-H4K8ac_peak_11495 | 18.7894  |                                                        |
| 16 | 81765436 | 81765636 | KD2-H4K8ac_peak_11496 | 6.72021  |                                                        |
| 16 | 81779300 | 81779947 | KD2-H4K8ac_peak_11497 | 13.95627 |                                                        |
| 16 | 82203403 | 82203750 | KD2-H4K8ac_peak_11498 | 14.48084 | MPHOSPH6_ENSG00000135698;CTD-2588J6.2_ENSG00000261029  |

|    |          |          |                       |          |                                                       |
|----|----------|----------|-----------------------|----------|-------------------------------------------------------|
| 16 | 82203982 | 82204340 | KD2-H4K8ac_peak_11499 | 8.10216  | MPHOSPH6_ENSG00000135698;CTD-2588J6.2_ENSG00000261029 |
| 16 | 83840990 | 83841402 | KD2-H4K8ac_peak_11500 | 7.1181   | RP11-483P21.2_ENSG00000260228;HSBP1_ENSG00000230989   |
| 16 | 83841648 | 83842008 | KD2-H4K8ac_peak_11501 | 11.50346 | RP11-483P21.2_ENSG00000260228;HSBP1_ENSG00000230989   |
| 16 | 83932145 | 83932375 | KD2-H4K8ac_peak_11502 | 10.96455 | MLYCD_ENSG00000103150                                 |
| 16 | 83932818 | 83933391 | KD2-H4K8ac_peak_11503 | 10.19949 | MLYCD_ENSG00000103150                                 |
| 16 | 83986190 | 83987048 | KD2-H4K8ac_peak_11504 | 6.65673  |                                                       |
| 16 | 84002305 | 84002773 | KD2-H4K8ac_peak_11505 | 7.13615  | NECAB2_ENSG00000103154                                |
| 16 | 84150740 | 84151115 | KD2-H4K8ac_peak_11506 | 6.16883  | MBTPS1_ENSG00000140943;RP11-505K9.1_ENSG00000260018   |
| 16 | 84178464 | 84178713 | KD2-H4K8ac_peak_11507 | 11.54737 | HSDL1_ENSG00000103160;DNAAF1_ENSG00000154099          |
| 16 | 84220230 | 84220629 | KD2-H4K8ac_peak_11508 | 15.22643 | TAF1C_ENSG00000103168                                 |
| 16 | 84267768 | 84268221 | KD2-H4K8ac_peak_11509 | 8.30974  |                                                       |
| 16 | 84268470 | 84268702 | KD2-H4K8ac_peak_11510 | 9.06703  |                                                       |
| 16 | 84538529 | 84538808 | KD2-H4K8ac_peak_11511 | 5.01002  |                                                       |
| 16 | 84681435 | 84681864 | KD2-H4K8ac_peak_11512 | 7.47462  | KLHL36_ENSG00000135686                                |
| 16 | 84682174 | 84682554 | KD2-H4K8ac_peak_11513 | 4.86324  | KLHL36_ENSG00000135686                                |
| 16 | 84733148 | 84734183 | KD2-H4K8ac_peak_11514 | 17.69527 | USP10_ENSG00000103194                                 |
| 16 | 84860156 | 84860369 | KD2-H4K8ac_peak_11515 | 8.10216  |                                                       |
| 16 | 85044568 | 85045023 | KD2-H4K8ac_peak_11516 | 8.85813  | ZDHHC7_ENSG00000153786                                |
| 16 | 85045282 | 85045692 | KD2-H4K8ac_peak_11517 | 8.79106  | ZDHHC7_ENSG00000153786                                |
| 16 | 85067543 | 85067765 | KD2-H4K8ac_peak_11518 | 4.37708  |                                                       |
| 16 | 85145956 | 85146488 | KD2-H4K8ac_peak_11519 | 4.86324  | FAM92B_ENSG00000153789                                |
| 16 | 85160259 | 85160627 | KD2-H4K8ac_peak_11520 | 6.99815  |                                                       |
| 16 | 85169921 | 85170120 | KD2-H4K8ac_peak_11521 | 5.45396  |                                                       |
| 16 | 85170728 | 85171562 | KD2-H4K8ac_peak_11522 | 12.82393 |                                                       |
| 16 | 85183435 | 85184144 | KD2-H4K8ac_peak_11523 | 6.66692  |                                                       |
| 16 | 85184863 | 85185267 | KD2-H4K8ac_peak_11524 | 7.76329  |                                                       |
| 16 | 85185569 | 85186260 | KD2-H4K8ac_peak_11525 | 15.82362 |                                                       |
| 16 | 85191274 | 85192432 | KD2-H4K8ac_peak_11526 | 10.73134 |                                                       |
| 16 | 85202273 | 85202529 | KD2-H4K8ac_peak_11527 | 6.84261  |                                                       |
| 16 | 85203219 | 85203553 | KD2-H4K8ac_peak_11528 | 8.23274  |                                                       |
| 16 | 85207587 | 85208485 | KD2-H4K8ac_peak_11529 | 9.59905  |                                                       |
| 16 | 85230741 | 85230977 | KD2-H4K8ac_peak_11530 | 15.57998 |                                                       |
| 16 | 85235786 | 85236430 | KD2-H4K8ac_peak_11531 | 10.7186  |                                                       |
| 16 | 85236787 | 85237342 | KD2-H4K8ac_peak_11532 | 13.73635 |                                                       |
| 16 | 85239142 | 85240227 | KD2-H4K8ac_peak_11533 | 12.60538 |                                                       |
| 16 | 85240630 | 85242157 | KD2-H4K8ac_peak_11534 | 19.55721 |                                                       |
| 16 | 85253211 | 85253793 | KD2-H4K8ac_peak_11535 | 9.57101  |                                                       |
| 16 | 85254336 | 85255706 | KD2-H4K8ac_peak_11536 | 20.8421  |                                                       |
| 16 | 85262794 | 85263022 | KD2-H4K8ac_peak_11537 | 6.30229  |                                                       |
| 16 | 85268501 | 85270047 | KD2-H4K8ac_peak_11538 | 21.16019 |                                                       |
| 16 | 85271989 | 85272218 | KD2-H4K8ac_peak_11539 | 4.67342  |                                                       |
| 16 | 85280382 | 85281031 | KD2-H4K8ac_peak_11540 | 7.167    |                                                       |
| 16 | 85283784 | 85284023 | KD2-H4K8ac_peak_11541 | 6.30229  |                                                       |
| 16 | 85292465 | 85292718 | KD2-H4K8ac_peak_11542 | 4.8888   |                                                       |
| 16 | 85303010 | 85303461 | KD2-H4K8ac_peak_11543 | 6.80057  |                                                       |
| 16 | 85304468 | 85304924 | KD2-H4K8ac_peak_11544 | 7.22167  |                                                       |

|    |          |          |                       |          |                               |
|----|----------|----------|-----------------------|----------|-------------------------------|
| 16 | 85317734 | 85318143 | KD2-H4K8ac_peak_11545 | 6.8108   |                               |
| 16 | 85319479 | 85319846 | KD2-H4K8ac_peak_11546 | 8.36514  |                               |
| 16 | 85320984 | 85321446 | KD2-H4K8ac_peak_11547 | 4.52514  |                               |
| 16 | 85335293 | 85335694 | KD2-H4K8ac_peak_11548 | 4.54006  |                               |
| 16 | 85348261 | 85348515 | KD2-H4K8ac_peak_11549 | 5.28072  |                               |
| 16 | 85382094 | 85382525 | KD2-H4K8ac_peak_11550 | 6.55628  |                               |
| 16 | 85382996 | 85384131 | KD2-H4K8ac_peak_11551 | 15.05364 |                               |
| 16 | 85388100 | 85388697 | KD2-H4K8ac_peak_11552 | 10.37168 |                               |
| 16 | 85389407 | 85390051 | KD2-H4K8ac_peak_11553 | 6.20982  |                               |
| 16 | 85390404 | 85391278 | KD2-H4K8ac_peak_11554 | 7.47462  | RP11-680G10.1_ENSG00000261567 |
| 16 | 85392331 | 85393070 | KD2-H4K8ac_peak_11555 | 8.58069  |                               |
| 16 | 85395018 | 85395248 | KD2-H4K8ac_peak_11556 | 9.87106  |                               |
| 16 | 85399494 | 85400091 | KD2-H4K8ac_peak_11557 | 9.57101  |                               |
| 16 | 85400578 | 85400851 | KD2-H4K8ac_peak_11558 | 8.79106  |                               |
| 16 | 85409977 | 85410378 | KD2-H4K8ac_peak_11559 | 11.48808 |                               |
| 16 | 85411229 | 85412917 | KD2-H4K8ac_peak_11560 | 11.28831 |                               |
| 16 | 85415972 | 85416214 | KD2-H4K8ac_peak_11561 | 6.8713   |                               |
| 16 | 85428110 | 85428535 | KD2-H4K8ac_peak_11562 | 5.02474  |                               |
| 16 | 85429562 | 85430788 | KD2-H4K8ac_peak_11563 | 10.29842 |                               |
| 16 | 85478388 | 85479049 | KD2-H4K8ac_peak_11564 | 10.73134 |                               |
| 16 | 85479398 | 85479605 | KD2-H4K8ac_peak_11565 | 8.28234  |                               |
| 16 | 85480003 | 85480895 | KD2-H4K8ac_peak_11566 | 14.64974 |                               |
| 16 | 85481801 | 85483266 | KD2-H4K8ac_peak_11567 | 7.11824  |                               |
| 16 | 85496459 | 85496779 | KD2-H4K8ac_peak_11568 | 8.85813  |                               |
| 16 | 85506654 | 85506874 | KD2-H4K8ac_peak_11569 | 7.28827  |                               |
| 16 | 85507823 | 85508087 | KD2-H4K8ac_peak_11570 | 5.08628  |                               |
| 16 | 85508708 | 85509063 | KD2-H4K8ac_peak_11571 | 6.92624  |                               |
| 16 | 85509565 | 85510014 | KD2-H4K8ac_peak_11572 | 9.66321  |                               |
| 16 | 85549166 | 85549414 | KD2-H4K8ac_peak_11573 | 4.85088  |                               |
| 16 | 85563185 | 85563668 | KD2-H4K8ac_peak_11574 | 6.99815  |                               |
| 16 | 85586972 | 85587706 | KD2-H4K8ac_peak_11575 | 12.57143 |                               |
| 16 | 85588155 | 85588972 | KD2-H4K8ac_peak_11576 | 13.81781 |                               |
| 16 | 85590075 | 85590275 | KD2-H4K8ac_peak_11577 | 9.36516  |                               |
| 16 | 85595304 | 85595591 | KD2-H4K8ac_peak_11578 | 4.06758  |                               |
| 16 | 85607983 | 85608563 | KD2-H4K8ac_peak_11579 | 10.96455 |                               |
| 16 | 85615852 | 85616170 | KD2-H4K8ac_peak_11580 | 4.86324  |                               |
| 16 | 85619910 | 85620538 | KD2-H4K8ac_peak_11581 | 7.93362  |                               |
| 16 | 85626933 | 85627155 | KD2-H4K8ac_peak_11582 | 14.57937 |                               |
| 16 | 85627467 | 85627660 | KD2-H4K8ac_peak_11583 | 6.67081  |                               |
| 16 | 85639978 | 85640394 | KD2-H4K8ac_peak_11584 | 15.40891 |                               |
| 16 | 85640757 | 85641481 | KD2-H4K8ac_peak_11585 | 9.63487  |                               |
| 16 | 85644540 | 85644739 | KD2-H4K8ac_peak_11586 | 6.62541  | GSE1_ENSG00000131149          |
| 16 | 85644969 | 85645788 | KD2-H4K8ac_peak_11587 | 17.41726 | GSE1_ENSG00000131149          |
| 16 | 85646450 | 85647271 | KD2-H4K8ac_peak_11588 | 15.61313 |                               |
| 16 | 85648027 | 85648738 | KD2-H4K8ac_peak_11589 | 14.95369 |                               |
| 16 | 85649989 | 85650315 | KD2-H4K8ac_peak_11590 | 3.97079  |                               |



|    |          |          |                       |          |                                                       |
|----|----------|----------|-----------------------|----------|-------------------------------------------------------|
| 16 | 85659117 | 85659724 | KD2-H4K8ac_peak_11591 | 6.04107  |                                                       |
| 16 | 85683663 | 85684295 | KD2-H4K8ac_peak_11592 | 7.44324  |                                                       |
| 16 | 85685025 | 85686630 | KD2-H4K8ac_peak_11593 | 10.66719 |                                                       |
| 16 | 85687106 | 85687462 | KD2-H4K8ac_peak_11594 | 5.13615  |                                                       |
| 16 | 85832634 | 85832854 | KD2-H4K8ac_peak_11595 | 7.20567  | EMC8_ENSG00000131148;COX4II_ENSG00000131143           |
| 16 | 85833344 | 85833889 | KD2-H4K8ac_peak_11596 | 8.4716   | EMC8_ENSG00000131148                                  |
| 16 | 86588400 | 86588728 | KD2-H4K8ac_peak_11597 | 11.24702 | MTHFSD_ENSG00000103248                                |
| 16 | 86588984 | 86589782 | KD2-H4K8ac_peak_11598 | 15.81711 | MTHFSD_ENSG00000103248                                |
| 16 | 87350667 | 87350870 | KD2-H4K8ac_peak_11599 | 11.04256 | C16orf95_ENSG00000260456;RP11-178L8.7_ENSG00000270006 |
| 16 | 87387096 | 87387299 | KD2-H4K8ac_peak_11600 | 5.15777  |                                                       |
| 16 | 87397798 | 87398428 | KD2-H4K8ac_peak_11601 | 5.88845  |                                                       |
| 16 | 87417955 | 87418641 | KD2-H4K8ac_peak_11602 | 8.55271  | MAP1LC3B_ENSG00000140941                              |
| 16 | 87421640 | 87421918 | KD2-H4K8ac_peak_11603 | 8.30974  |                                                       |
| 16 | 87425067 | 87425653 | KD2-H4K8ac_peak_11604 | 10.7186  | FBXO31_ENSG00000103264                                |
| 16 | 87491799 | 87492036 | KD2-H4K8ac_peak_11605 | 5.405    |                                                       |
| 16 | 87492350 | 87492771 | KD2-H4K8ac_peak_11606 | 6.60096  |                                                       |
| 16 | 87498467 | 87498774 | KD2-H4K8ac_peak_11607 | 12.42761 |                                                       |
| 16 | 87499072 | 87499344 | KD2-H4K8ac_peak_11608 | 5.14125  |                                                       |
| 16 | 87500003 | 87500534 | KD2-H4K8ac_peak_11609 | 14.23999 |                                                       |
| 16 | 87503244 | 87504105 | KD2-H4K8ac_peak_11610 | 9.1707   |                                                       |
| 16 | 87511371 | 87511571 | KD2-H4K8ac_peak_11611 | 7.1181   |                                                       |
| 16 | 87526979 | 87527494 | KD2-H4K8ac_peak_11612 | 10.19949 | RP11-482M8.1_ENSG00000260750                          |
| 16 | 87551906 | 87552657 | KD2-H4K8ac_peak_11613 | 7.47462  |                                                       |
| 16 | 87584324 | 87584695 | KD2-H4K8ac_peak_11614 | 6.40683  |                                                       |
| 16 | 87590347 | 87590635 | KD2-H4K8ac_peak_11615 | 11.43863 |                                                       |
| 16 | 87604310 | 87604679 | KD2-H4K8ac_peak_11616 | 9.36665  |                                                       |
| 16 | 87615978 | 87616426 | KD2-H4K8ac_peak_11617 | 5.14125  |                                                       |
| 16 | 87622627 | 87622967 | KD2-H4K8ac_peak_11618 | 6.66692  |                                                       |
| 16 | 87755726 | 87756672 | KD2-H4K8ac_peak_11619 | 11.92978 |                                                       |
| 16 | 87799367 | 87800729 | KD2-H4K8ac_peak_11620 | 13.13969 | KLHDC4_ENSG00000104731                                |
| 16 | 87812163 | 87813195 | KD2-H4K8ac_peak_11621 | 21.50391 | RP4-536B24.4_ENSG00000260498                          |
| 16 | 87813558 | 87813792 | KD2-H4K8ac_peak_11622 | 5.14125  | RP4-536B24.4_ENSG00000260498                          |
| 16 | 87839596 | 87841562 | KD2-H4K8ac_peak_11623 | 16.67374 | RP4-536B24.3_ENSG00000260177                          |
| 16 | 87885863 | 87886140 | KD2-H4K8ac_peak_11624 | 8.30974  |                                                       |
| 16 | 87886932 | 87887248 | KD2-H4K8ac_peak_11625 | 13.31016 |                                                       |
| 16 | 87888533 | 87888746 | KD2-H4K8ac_peak_11626 | 4.8888   |                                                       |
| 16 | 87888991 | 87889329 | KD2-H4K8ac_peak_11627 | 5.76151  |                                                       |
| 16 | 87904971 | 87905201 | KD2-H4K8ac_peak_11628 | 7.31433  |                                                       |
| 16 | 87905600 | 87905905 | KD2-H4K8ac_peak_11629 | 10.05606 |                                                       |
| 16 | 87952934 | 87953228 | KD2-H4K8ac_peak_11630 | 5.14125  |                                                       |
| 16 | 87958372 | 87958584 | KD2-H4K8ac_peak_11631 | 3.75035  |                                                       |
| 16 | 87958899 | 87959175 | KD2-H4K8ac_peak_11632 | 5.45396  |                                                       |
| 16 | 87978731 | 87980141 | KD2-H4K8ac_peak_11633 | 6.66692  | CTD-3057O21.1_ENSG00000260443                         |
| 16 | 87985150 | 87985715 | KD2-H4K8ac_peak_11634 | 15.58442 |                                                       |
| 16 | 88075568 | 88075923 | KD2-H4K8ac_peak_11635 | 7.76104  |                                                       |
| 16 | 88076384 | 88076906 | KD2-H4K8ac_peak_11636 | 8.98477  |                                                       |

|    |          |          |                       |          |                                                             |
|----|----------|----------|-----------------------|----------|-------------------------------------------------------------|
| 16 | 88096098 | 88097242 | KD2-H4K8ac_peak_11637 | 11.92978 |                                                             |
| 16 | 88110175 | 88110539 | KD2-H4K8ac_peak_11638 | 13.30586 |                                                             |
| 16 | 88111424 | 88112184 | KD2-H4K8ac_peak_11639 | 8.86099  |                                                             |
| 16 | 88125096 | 88125908 | KD2-H4K8ac_peak_11640 | 11.24702 |                                                             |
| 16 | 88126257 | 88126854 | KD2-H4K8ac_peak_11641 | 11.89502 |                                                             |
| 16 | 88133909 | 88134516 | KD2-H4K8ac_peak_11642 | 10.77651 | RP11-863P13.4_ENSG00000205037                               |
| 16 | 88153597 | 88154617 | KD2-H4K8ac_peak_11643 | 9.16531  |                                                             |
| 16 | 88166586 | 88166959 | KD2-H4K8ac_peak_11644 | 3.97079  |                                                             |
| 16 | 88167574 | 88168034 | KD2-H4K8ac_peak_11645 | 5.14125  |                                                             |
| 16 | 88168629 | 88168874 | KD2-H4K8ac_peak_11646 | 10.61986 |                                                             |
| 16 | 88169068 | 88169273 | KD2-H4K8ac_peak_11647 | 11.24702 |                                                             |
| 16 | 88170378 | 88170577 | KD2-H4K8ac_peak_11648 | 6.25869  |                                                             |
| 16 | 88175280 | 88175875 | KD2-H4K8ac_peak_11649 | 4.54006  |                                                             |
| 16 | 88176209 | 88177181 | KD2-H4K8ac_peak_11650 | 10.17341 |                                                             |
| 16 | 88177492 | 88177896 | KD2-H4K8ac_peak_11651 | 21.2844  |                                                             |
| 16 | 88179060 | 88179763 | KD2-H4K8ac_peak_11652 | 10.15155 |                                                             |
| 16 | 88180057 | 88180390 | KD2-H4K8ac_peak_11653 | 6.67538  |                                                             |
| 16 | 88183008 | 88183326 | KD2-H4K8ac_peak_11654 | 9.90914  |                                                             |
| 16 | 88227867 | 88228099 | KD2-H4K8ac_peak_11655 | 5.14125  | RP11-863P13.2_ENSG00000261816;LA16c-444G7.2_ENSG00000260420 |
| 16 | 88228455 | 88228657 | KD2-H4K8ac_peak_11656 | 12.42761 | LA16c-444G7.2_ENSG00000260420                               |
| 16 | 88261821 | 88262045 | KD2-H4K8ac_peak_11657 | 5.57044  |                                                             |
| 16 | 88265286 | 88265962 | KD2-H4K8ac_peak_11658 | 7.47462  |                                                             |
| 16 | 88266228 | 88267005 | KD2-H4K8ac_peak_11659 | 6.20982  |                                                             |
| 16 | 88268010 | 88268356 | KD2-H4K8ac_peak_11660 | 11.05467 | LA16c-444G7.1_ENSG00000261273                               |
| 16 | 88268624 | 88269091 | KD2-H4K8ac_peak_11661 | 11.05467 | LA16c-444G7.1_ENSG00000261273                               |
| 16 | 88271389 | 88271608 | KD2-H4K8ac_peak_11662 | 10.70006 |                                                             |
| 16 | 88271806 | 88272218 | KD2-H4K8ac_peak_11663 | 12.93253 |                                                             |
| 16 | 88273775 | 88274157 | KD2-H4K8ac_peak_11664 | 6.98292  |                                                             |
| 16 | 88295932 | 88296270 | KD2-H4K8ac_peak_11665 | 6.05995  |                                                             |
| 16 | 88296725 | 88297277 | KD2-H4K8ac_peak_11666 | 8.26945  |                                                             |
| 16 | 88307911 | 88308607 | KD2-H4K8ac_peak_11667 | 5.01002  |                                                             |
| 16 | 88308878 | 88309518 | KD2-H4K8ac_peak_11668 | 15.53798 |                                                             |
| 16 | 88309720 | 88310080 | KD2-H4K8ac_peak_11669 | 7.13615  |                                                             |
| 16 | 88449425 | 88449642 | KD2-H4K8ac_peak_11670 | 5.30799  |                                                             |
| 16 | 88471777 | 88472940 | KD2-H4K8ac_peak_11671 | 12.84642 |                                                             |
| 16 | 88503564 | 88503851 | KD2-H4K8ac_peak_11672 | 12.70959 |                                                             |
| 16 | 88515550 | 88515956 | KD2-H4K8ac_peak_11673 | 10.12356 |                                                             |
| 16 | 88522073 | 88522284 | KD2-H4K8ac_peak_11674 | 6.20982  |                                                             |
| 16 | 88527701 | 88527959 | KD2-H4K8ac_peak_11675 | 7.07512  |                                                             |
| 16 | 88529403 | 88530142 | KD2-H4K8ac_peak_11676 | 7.86151  |                                                             |
| 16 | 88531794 | 88532374 | KD2-H4K8ac_peak_11677 | 11.09936 |                                                             |
| 16 | 88564241 | 88564433 | KD2-H4K8ac_peak_11678 | 5.57044  |                                                             |
| 16 | 88571113 | 88571421 | KD2-H4K8ac_peak_11679 | 7.57979  |                                                             |
| 16 | 88579117 | 88579606 | KD2-H4K8ac_peak_11680 | 14.56955 |                                                             |
| 16 | 88625059 | 88625286 | KD2-H4K8ac_peak_11681 | 5.88845  |                                                             |
| 16 | 88636922 | 88637216 | KD2-H4K8ac_peak_11682 | 8.55271  | ZC3H18_ENSG00000158545                                      |

|    |          |          |                       |          |                                                     |
|----|----------|----------|-----------------------|----------|-----------------------------------------------------|
| 16 | 88716753 | 88717482 | KD2-H4K8ac_peak_11683 | 10.4923  | CYBA_ENSG00000051523                                |
| 16 | 88729057 | 88729379 | KD2-H4K8ac_peak_11684 | 7.47462  | MVD_ENSG00000167508;SNAI3-AS1_ENSG00000260630       |
| 16 | 88794588 | 88794869 | KD2-H4K8ac_peak_11685 | 6.84261  |                                                     |
| 16 | 88796497 | 88796716 | KD2-H4K8ac_peak_11686 | 6.25869  | RP5-1142A6.2_ENSG00000224888                        |
| 16 | 88797337 | 88797611 | KD2-H4K8ac_peak_11687 | 9.07715  | RP5-1142A6.2_ENSG00000224888                        |
| 16 | 88797886 | 88798202 | KD2-H4K8ac_peak_11688 | 9.96798  | RP5-1142A6.2_ENSG00000224888                        |
| 16 | 88869514 | 88869933 | KD2-H4K8ac_peak_11689 | 17.55491 | CDT1_ENSG00000167513                                |
| 16 | 88870247 | 88870475 | KD2-H4K8ac_peak_11690 | 8.85813  | CDT1_ENSG00000167513                                |
| 16 | 88877987 | 88878298 | KD2-H4K8ac_peak_11691 | 12.96152 | APRT_ENSG00000198931                                |
| 16 | 88878498 | 88879153 | KD2-H4K8ac_peak_11692 | 18.37277 | APRT_ENSG00000198931                                |
| 16 | 88922770 | 88922967 | KD2-H4K8ac_peak_11693 | 9.51625  | GALNS_ENSG00000141012;TRAPPC2L_ENSG00000167515      |
| 16 | 88923575 | 88924009 | KD2-H4K8ac_peak_11694 | 19.93588 | GALNS_ENSG00000141012;TRAPPC2L_ENSG00000167515      |
| 16 | 89137633 | 89139494 | KD2-H4K8ac_peak_11695 | 9.95119  |                                                     |
| 16 | 89159597 | 89160701 | KD2-H4K8ac_peak_11696 | 12.46522 |                                                     |
| 16 | 89216792 | 89217264 | KD2-H4K8ac_peak_11697 | 12.40345 |                                                     |
| 16 | 89218010 | 89218335 | KD2-H4K8ac_peak_11698 | 6.24114  |                                                     |
| 16 | 89233583 | 89233912 | KD2-H4K8ac_peak_11699 | 14.43704 | RP11-46C24.3_ENSG00000205015                        |
| 16 | 89283779 | 89284529 | KD2-H4K8ac_peak_11700 | 20.02161 | RP11-46C24.7_ENSG00000259877;ZNF778_ENSG00000170100 |
| 16 | 89306716 | 89307416 | KD2-H4K8ac_peak_11701 | 11.07495 |                                                     |
| 16 | 89467987 | 89468234 | KD2-H4K8ac_peak_11702 | 11.52086 |                                                     |
| 16 | 89568541 | 89568734 | KD2-H4K8ac_peak_11703 | 4.77079  |                                                     |
| 16 | 89573922 | 89575225 | KD2-H4K8ac_peak_11704 | 18.94636 |                                                     |
| 16 | 89625788 | 89626030 | KD2-H4K8ac_peak_11705 | 6.30229  |                                                     |
| 16 | 89626365 | 89626912 | KD2-H4K8ac_peak_11706 | 9.63487  | RPL13_ENSG00000167526;SNORD68_ENSG00000200084       |
| 16 | 89627134 | 89627743 | KD2-H4K8ac_peak_11707 | 14.88905 | RPL13_ENSG00000167526;SNORD68_ENSG00000200084       |
| 16 | 89668699 | 89669074 | KD2-H4K8ac_peak_11708 | 4.42765  |                                                     |
| 16 | 89675122 | 89675410 | KD2-H4K8ac_peak_11709 | 5.29352  |                                                     |
| 16 | 89681948 | 89682280 | KD2-H4K8ac_peak_11710 | 5.14125  |                                                     |
| 16 | 89682800 | 89683209 | KD2-H4K8ac_peak_11711 | 4.77079  |                                                     |
| 16 | 89723635 | 89724065 | KD2-H4K8ac_peak_11712 | 9.41619  | CHMP1A_ENSG00000131165;SPATA33_ENSG00000167523      |
| 16 | 89753175 | 89753511 | KD2-H4K8ac_peak_11713 | 5.38581  | RP11-368I7.4_ENSG00000260259                        |
| 16 | 89772208 | 89772830 | KD2-H4K8ac_peak_11714 | 8.98093  |                                                     |
| 16 | 89786601 | 89787753 | KD2-H4K8ac_peak_11715 | 23.17589 | VPS9D1_ENSG00000075399;ZNF276_ENSG00000158805       |
| 16 | 89882562 | 89883688 | KD2-H4K8ac_peak_11716 | 18.37277 | SPIRE2_ENSG00000204991;FANCA_ENSG00000187741        |
| 16 | 89894378 | 89894669 | KD2-H4K8ac_peak_11717 | 20.46575 |                                                     |
| 16 | 89894947 | 89895154 | KD2-H4K8ac_peak_11718 | 8.2413   |                                                     |
| 16 | 89939397 | 89939888 | KD2-H4K8ac_peak_11719 | 13.31016 | TCF25_ENSG00000141002                               |
| 16 | 89976271 | 89976816 | KD2-H4K8ac_peak_11720 | 6.25869  |                                                     |
| 16 | 89984262 | 89985141 | KD2-H4K8ac_peak_11721 | 11.28765 | AC092143.1_ENSG00000256390;TUBB3_ENSG00000198211    |
| 16 | 89988775 | 89989560 | KD2-H4K8ac_peak_11722 | 10.40376 | RP11-566K11.4_ENSG00000259006;TUBB3_ENSG00000258947 |
| 16 | 89990309 | 89990573 | KD2-H4K8ac_peak_11723 | 3.97079  |                                                     |
| 16 | 90014096 | 90015026 | KD2-H4K8ac_peak_11724 | 10.19949 | DEF8_ENSG00000140995                                |
| 16 | 90038279 | 90039707 | KD2-H4K8ac_peak_11725 | 19.7067  | CENPBD1_ENSG00000177946;AFG3L1P_ENSG00000223959     |
| 16 | 90085160 | 90085809 | KD2-H4K8ac_peak_11726 | 11.05155 | DBNDD1_ENSG00000003249;GAS8_ENSG00000141013         |
| 16 | 90086048 | 90086509 | KD2-H4K8ac_peak_11727 | 9.49967  | DBNDD1_ENSG00000003249;GAS8_ENSG00000141013         |
| 16 | 90087451 | 90087694 | KD2-H4K8ac_peak_11728 | 6.30229  | DBNDD1_ENSG00000003249                              |

|    |          |          |                       |          |                                               |
|----|----------|----------|-----------------------|----------|-----------------------------------------------|
| 16 | 90089087 | 90089524 | KD2-H4K8ac_peak_11729 | 8.5092   |                                               |
| 16 | 90113026 | 90114138 | KD2-H4K8ac_peak_11730 | 15.61313 | URAHF_ENSG00000222019                         |
| 16 | 90148702 | 90149462 | KD2-H4K8ac_peak_11731 | 8.30974  |                                               |
| 17 | 29283    | 31196    | KD2-H4K8ac_peak_11732 | 16.8435  | DOC2B_ENSG00000272636                         |
| 17 | 31503    | 31728    | KD2-H4K8ac_peak_11733 | 5.51783  | DOC2B_ENSG00000272636                         |
| 17 | 147943   | 148189   | KD2-H4K8ac_peak_11734 | 4.24345  |                                               |
| 17 | 150448   | 150761   | KD2-H4K8ac_peak_11735 | 15.22643 |                                               |
| 17 | 160035   | 160377   | KD2-H4K8ac_peak_11736 | 4.42765  |                                               |
| 17 | 183863   | 184146   | KD2-H4K8ac_peak_11737 | 7.40111  |                                               |
| 17 | 202285   | 202562   | KD2-H4K8ac_peak_11738 | 7.146    | RP11-1260E13.2_ENSG00000262294                |
| 17 | 235244   | 235570   | KD2-H4K8ac_peak_11739 | 14.68449 | RPH3AL_ENSG00000181031                        |
| 17 | 235783   | 236240   | KD2-H4K8ac_peak_11740 | 4.06758  | RPH3AL_ENSG00000181031                        |
| 17 | 259224   | 259730   | KD2-H4K8ac_peak_11741 | 12.42761 | C17orf97_ENSG00000187624                      |
| 17 | 500377   | 500850   | KD2-H4K8ac_peak_11742 | 9.11031  |                                               |
| 17 | 503454   | 504402   | KD2-H4K8ac_peak_11743 | 9.31907  |                                               |
| 17 | 505827   | 506050   | KD2-H4K8ac_peak_11744 | 10.96455 |                                               |
| 17 | 511972   | 512164   | KD2-H4K8ac_peak_11745 | 9.11031  |                                               |
| 17 | 618263   | 618467   | KD2-H4K8ac_peak_11746 | 5.53033  |                                               |
| 17 | 634761   | 635515   | KD2-H4K8ac_peak_11747 | 11.24702 | FAM57A_ENSG00000167695                        |
| 17 | 635745   | 636707   | KD2-H4K8ac_peak_11748 | 16.32216 | FAM57A_ENSG00000167695                        |
| 17 | 655048   | 655370   | KD2-H4K8ac_peak_11749 | 12.57297 | DBIL5P_ENSG00000231784                        |
| 17 | 655676   | 656309   | KD2-H4K8ac_peak_11750 | 9.26408  | GEMIN4_ENSG00000179409;DBIL5P_ENSG00000231784 |
| 17 | 685194   | 685395   | KD2-H4K8ac_peak_11751 | 5.75452  | RNMTL1_ENSG00000171861                        |
| 17 | 685663   | 685958   | KD2-H4K8ac_peak_11752 | 5.30799  | RNMTL1_ENSG00000171861                        |
| 17 | 883316   | 883697   | KD2-H4K8ac_peak_11753 | 6.25869  | NXN_ENSG00000167693                           |
| 17 | 899506   | 899871   | KD2-H4K8ac_peak_11754 | 10.63725 | TIMM22_ENSG00000177370                        |
| 17 | 933737   | 934648   | KD2-H4K8ac_peak_11755 | 4.211    |                                               |
| 17 | 974480   | 974858   | KD2-H4K8ac_peak_11756 | 5.53033  |                                               |
| 17 | 980980   | 981233   | KD2-H4K8ac_peak_11757 | 6.67092  |                                               |
| 17 | 981458   | 982070   | KD2-H4K8ac_peak_11758 | 10.29842 |                                               |
| 17 | 982530   | 982860   | KD2-H4K8ac_peak_11759 | 7.34308  |                                               |
| 17 | 987326   | 987568   | KD2-H4K8ac_peak_11760 | 5.88845  |                                               |
| 17 | 991248   | 991532   | KD2-H4K8ac_peak_11761 | 4.211    |                                               |
| 17 | 1011543  | 1011747  | KD2-H4K8ac_peak_11762 | 5.58725  |                                               |
| 17 | 1012143  | 1012976  | KD2-H4K8ac_peak_11763 | 15.59774 |                                               |
| 17 | 1014712  | 1014968  | KD2-H4K8ac_peak_11764 | 4.8888   |                                               |
| 17 | 1057281  | 1057878  | KD2-H4K8ac_peak_11765 | 11.43863 |                                               |
| 17 | 1083540  | 1083974  | KD2-H4K8ac_peak_11766 | 6.52179  |                                               |
| 17 | 1090314  | 1090590  | KD2-H4K8ac_peak_11767 | 7.76329  |                                               |
| 17 | 1106896  | 1107105  | KD2-H4K8ac_peak_11768 | 6.13909  |                                               |
| 17 | 1154980  | 1155257  | KD2-H4K8ac_peak_11769 | 7.15405  |                                               |
| 17 | 1155836  | 1156184  | KD2-H4K8ac_peak_11770 | 5.54647  |                                               |
| 17 | 1171144  | 1172223  | KD2-H4K8ac_peak_11771 | 20.2003  |                                               |
| 17 | 1302774  | 1303289  | KD2-H4K8ac_peak_11772 | 17.05794 | YWHAE_ENSG00000108953                         |
| 17 | 1303734  | 1304162  | KD2-H4K8ac_peak_11773 | 6.66692  | YWHAE_ENSG00000108953                         |
| 17 | 1358936  | 1359496  | KD2-H4K8ac_peak_11774 | 7.47462  |                                               |

|    |         |         |                       |          |                                                     |
|----|---------|---------|-----------------------|----------|-----------------------------------------------------|
| 17 | 1359799 | 1360185 | KD2-H4K8ac_peak_11775 | 6.40297  |                                                     |
| 17 | 1388907 | 1389770 | KD2-H4K8ac_peak_11776 | 8.16906  |                                                     |
| 17 | 1390962 | 1391258 | KD2-H4K8ac_peak_11777 | 4.44527  |                                                     |
| 17 | 1394254 | 1395576 | KD2-H4K8ac_peak_11778 | 4.91674  | MYO1C_ENSG00000197879                               |
| 17 | 1419600 | 1419836 | KD2-H4K8ac_peak_11779 | 4.67342  | INPP5K_ENSG00000132376;PITPNA-AS1_ENSG00000236618   |
| 17 | 1420290 | 1420726 | KD2-H4K8ac_peak_11780 | 5.88845  | INPP5K_ENSG00000132376;PITPNA-AS1_ENSG00000236618   |
| 17 | 1477158 | 1477562 | KD2-H4K8ac_peak_11781 | 5.74496  |                                                     |
| 17 | 1532350 | 1533228 | KD2-H4K8ac_peak_11782 | 12.30509 | SLC43A2_ENSG00000167703                             |
| 17 | 1551812 | 1552197 | KD2-H4K8ac_peak_11783 | 5.14125  |                                                     |
| 17 | 1587751 | 1588120 | KD2-H4K8ac_peak_11784 | 15.61313 | PRPF8_ENSG00000174231                               |
| 17 | 1588431 | 1588756 | KD2-H4K8ac_peak_11785 | 6.07178  | PRPF8_ENSG00000174231                               |
| 17 | 1613311 | 1613518 | KD2-H4K8ac_peak_11786 | 10.44656 | TLCD2_ENSG00000185561                               |
| 17 | 1619949 | 1620395 | KD2-H4K8ac_peak_11787 | 27.36011 | MIR22HG_ENSG00000186594;WDR81_ENSG00000167716       |
| 17 | 1620610 | 1621410 | KD2-H4K8ac_peak_11788 | 14.8314  | MIR22HG_ENSG00000186594;WDR81_ENSG00000167716       |
| 17 | 1627491 | 1627766 | KD2-H4K8ac_peak_11789 | 6.87784  |                                                     |
| 17 | 1628079 | 1628391 | KD2-H4K8ac_peak_11790 | 9.57101  |                                                     |
| 17 | 1658713 | 1659147 | KD2-H4K8ac_peak_11791 | 7.28827  |                                                     |
| 17 | 1665313 | 1666427 | KD2-H4K8ac_peak_11792 | 12.69325 | SERPINF1_ENSG00000132386                            |
| 17 | 1666938 | 1667648 | KD2-H4K8ac_peak_11793 | 9.26408  |                                                     |
| 17 | 1670133 | 1670384 | KD2-H4K8ac_peak_11794 | 6.25869  |                                                     |
| 17 | 1802129 | 1802537 | KD2-H4K8ac_peak_11795 | 9.11031  |                                                     |
| 17 | 1846152 | 1846391 | KD2-H4K8ac_peak_11796 | 6.36375  |                                                     |
| 17 | 1864500 | 1864694 | KD2-H4K8ac_peak_11797 | 4.42765  |                                                     |
| 17 | 1899174 | 1899601 | KD2-H4K8ac_peak_11798 | 9.1707   | CTD-2545H1.2_ENSG00000262445                        |
| 17 | 1944757 | 1945138 | KD2-H4K8ac_peak_11799 | 9.56945  | OVCA2_ENSG00000262664                               |
| 17 | 1945355 | 1946089 | KD2-H4K8ac_peak_11800 | 8.16906  | OVCA2_ENSG00000262664;RP11-667K14.4_ENSG00000262533 |
| 17 | 1953388 | 1954199 | KD2-H4K8ac_peak_11801 | 11.05467 | MIR132_ENSG00000267200;MIR212_ENSG00000267195       |
| 17 | 1966202 | 1966399 | KD2-H4K8ac_peak_11802 | 6.66692  |                                                     |
| 17 | 1971372 | 1971661 | KD2-H4K8ac_peak_11803 | 9.68068  |                                                     |
| 17 | 1971885 | 1972406 | KD2-H4K8ac_peak_11804 | 6.65673  |                                                     |
| 17 | 1978157 | 1979489 | KD2-H4K8ac_peak_11805 | 9.36516  |                                                     |
| 17 | 1980102 | 1980748 | KD2-H4K8ac_peak_11806 | 11.00372 |                                                     |
| 17 | 1985047 | 1985398 | KD2-H4K8ac_peak_11807 | 8.10216  |                                                     |
| 17 | 1985861 | 1986073 | KD2-H4K8ac_peak_11808 | 7.146    |                                                     |
| 17 | 1986690 | 1986919 | KD2-H4K8ac_peak_11809 | 10.78136 |                                                     |
| 17 | 1987478 | 1988356 | KD2-H4K8ac_peak_11810 | 7.74292  |                                                     |
| 17 | 2119169 | 2119590 | KD2-H4K8ac_peak_11811 | 9.92477  | AC130689.5_ENSG00000236457                          |
| 17 | 2206668 | 2207118 | KD2-H4K8ac_peak_11812 | 8.55271  | SMG6_ENSG00000070366;SRR_ENSG00000167720            |
| 17 | 2216543 | 2216810 | KD2-H4K8ac_peak_11813 | 3.63462  |                                                     |
| 17 | 2238917 | 2239668 | KD2-H4K8ac_peak_11814 | 4.33139  |                                                     |
| 17 | 2240443 | 2241237 | KD2-H4K8ac_peak_11815 | 7.36799  | TSR1_ENSG00000167721;SGSM2_ENSG00000141258          |
| 17 | 2283078 | 2283508 | KD2-H4K8ac_peak_11816 | 5.34636  | RP1-59D14.5_ENSG00000263345                         |
| 17 | 2295559 | 2295761 | KD2-H4K8ac_peak_11817 | 6.13909  |                                                     |
| 17 | 2296678 | 2297027 | KD2-H4K8ac_peak_11818 | 7.92775  |                                                     |
| 17 | 2297663 | 2297876 | KD2-H4K8ac_peak_11819 | 5.63428  |                                                     |
| 17 | 2302431 | 2302780 | KD2-H4K8ac_peak_11820 | 18.70363 |                                                     |

|    |         |         |                       |          |                                                                |
|----|---------|---------|-----------------------|----------|----------------------------------------------------------------|
| 17 | 2304570 | 2304857 | KD2-H4K8ac_peak_11821 | 11.39234 | MNT_ENSG00000070444                                            |
| 17 | 2305126 | 2305319 | KD2-H4K8ac_peak_11822 | 7.13615  | MNT_ENSG00000070444                                            |
| 17 | 2414626 | 2415090 | KD2-H4K8ac_peak_11823 | 6.40683  | METTL16_ENSG000000127804                                       |
| 17 | 2496930 | 2497664 | KD2-H4K8ac_peak_11824 | 12.17278 | PAFAH1B1_ENSG00000007168                                       |
| 17 | 2589121 | 2589322 | KD2-H4K8ac_peak_11825 | 4.77079  | RP11-74E22.5_ENSG00000272770                                   |
| 17 | 2614453 | 2614942 | KD2-H4K8ac_peak_11826 | 9.72244  | RP11-74E22.3_ENSG00000262050                                   |
| 17 | 2615160 | 2616050 | KD2-H4K8ac_peak_11827 | 15.22643 | CLUH_ENSG00000132361;RP11-74E22.3_ENSG00000262050              |
| 17 | 2679496 | 2680008 | KD2-H4K8ac_peak_11828 | 11.43863 | RAP1GAP2_ENSG00000132359                                       |
| 17 | 2680675 | 2680876 | KD2-H4K8ac_peak_11829 | 4.77079  | RAP1GAP2_ENSG00000132359                                       |
| 17 | 2750920 | 2751148 | KD2-H4K8ac_peak_11830 | 7.22457  |                                                                |
| 17 | 2755886 | 2756897 | KD2-H4K8ac_peak_11831 | 9.20193  |                                                                |
| 17 | 2804430 | 2804753 | KD2-H4K8ac_peak_11832 | 7.372    |                                                                |
| 17 | 2812969 | 2813202 | KD2-H4K8ac_peak_11833 | 6.60096  |                                                                |
| 17 | 2814604 | 2814879 | KD2-H4K8ac_peak_11834 | 7.73418  |                                                                |
| 17 | 2815218 | 2815774 | KD2-H4K8ac_peak_11835 | 11.27037 |                                                                |
| 17 | 2828712 | 2829710 | KD2-H4K8ac_peak_11836 | 10.19949 |                                                                |
| 17 | 2832063 | 2832772 | KD2-H4K8ac_peak_11837 | 14.275   |                                                                |
| 17 | 2843579 | 2843825 | KD2-H4K8ac_peak_11838 | 8.10216  |                                                                |
| 17 | 2855673 | 2855868 | KD2-H4K8ac_peak_11839 | 7.67496  |                                                                |
| 17 | 2862579 | 2862825 | KD2-H4K8ac_peak_11840 | 6.66692  |                                                                |
| 17 | 2863099 | 2863325 | KD2-H4K8ac_peak_11841 | 8.5092   |                                                                |
| 17 | 2863646 | 2864024 | KD2-H4K8ac_peak_11842 | 9.67696  |                                                                |
| 17 | 2864447 | 2864644 | KD2-H4K8ac_peak_11843 | 4.86324  |                                                                |
| 17 | 2866895 | 2867311 | KD2-H4K8ac_peak_11844 | 7.76329  |                                                                |
| 17 | 2868855 | 2869332 | KD2-H4K8ac_peak_11845 | 18.5703  | CTD-3060P21.1_ENSG00000262884                                  |
| 17 | 2874071 | 2874273 | KD2-H4K8ac_peak_11846 | 8.30974  |                                                                |
| 17 | 2906269 | 2907495 | KD2-H4K8ac_peak_11847 | 8.30974  |                                                                |
| 17 | 2907838 | 2908761 | KD2-H4K8ac_peak_11848 | 11.04256 |                                                                |
| 17 | 2951719 | 2952136 | KD2-H4K8ac_peak_11849 | 11.05467 |                                                                |
| 17 | 2952476 | 2952842 | KD2-H4K8ac_peak_11850 | 19.43192 |                                                                |
| 17 | 3438785 | 3439173 | KD2-H4K8ac_peak_11851 | 5.43522  |                                                                |
| 17 | 3539705 | 3540474 | KD2-H4K8ac_peak_11852 | 17.8868  | SHPK_ENSG00000262304;SHPK_ENSG00000197417;CTNS_ENSG00000040531 |
| 17 | 3571023 | 3571802 | KD2-H4K8ac_peak_11853 | 10.7186  | TAX1BP3_ENSG00000213977;EMC6_ENSG00000127774                   |
| 17 | 3572190 | 3572439 | KD2-H4K8ac_peak_11854 | 8.85813  | TAX1BP3_ENSG00000213977;EMC6_ENSG00000127774                   |
| 17 | 3598079 | 3598864 | KD2-H4K8ac_peak_11855 | 13.9234  | P2RX5-TAX1BP3_ENSG00000257950;P2RX5_ENSG00000083454            |
| 17 | 3626785 | 3627115 | KD2-H4K8ac_peak_11856 | 18.7894  | GSG2_ENSG00000177602                                           |
| 17 | 3748818 | 3749453 | KD2-H4K8ac_peak_11857 | 8.55271  | C17orf85_ENSG00000074356                                       |
| 17 | 3781897 | 3782418 | KD2-H4K8ac_peak_11858 | 5.88845  |                                                                |
| 17 | 3782903 | 3783447 | KD2-H4K8ac_peak_11859 | 8.02571  |                                                                |
| 17 | 3796540 | 3797107 | KD2-H4K8ac_peak_11860 | 11.09936 |                                                                |
| 17 | 3830432 | 3830836 | KD2-H4K8ac_peak_11861 | 5.32137  |                                                                |
| 17 | 3848272 | 3848641 | KD2-H4K8ac_peak_11862 | 16.49944 |                                                                |
| 17 | 3879821 | 3880185 | KD2-H4K8ac_peak_11863 | 4.3015   | RP11-459C13.1_ENSG00000263312                                  |
| 17 | 4047053 | 4047638 | KD2-H4K8ac_peak_11864 | 16.822   | ZZEF1_ENSG00000074755;CYB5D2_ENSG00000167740                   |
| 17 | 4064471 | 4064676 | KD2-H4K8ac_peak_11865 | 5.45396  |                                                                |
| 17 | 4166913 | 4167614 | KD2-H4K8ac_peak_11866 | 14.8083  | ANKFY1_ENSG00000185722                                         |

|    |         |         |                       |          |                                                                                                             |
|----|---------|---------|-----------------------|----------|-------------------------------------------------------------------------------------------------------------|
| 17 | 4268798 | 4269597 | KD2-H4K8ac_peak_11867 | 11.89502 | UBE2G1_ENSG00000132388                                                                                      |
| 17 | 4270247 | 4270496 | KD2-H4K8ac_peak_11868 | 4.44748  | UBE2G1_ENSG00000132388                                                                                      |
| 17 | 4378428 | 4379439 | KD2-H4K8ac_peak_11869 | 8.4084   |                                                                                                             |
| 17 | 4436775 | 4437027 | KD2-H4K8ac_peak_11870 | 9.33795  |                                                                                                             |
| 17 | 4437253 | 4438363 | KD2-H4K8ac_peak_11871 | 12.08081 |                                                                                                             |
| 17 | 4458815 | 4459444 | KD2-H4K8ac_peak_11872 | 13.59098 | MYBBP1A_ENSG00000132382                                                                                     |
| 17 | 4491721 | 4492186 | KD2-H4K8ac_peak_11873 | 5.54647  |                                                                                                             |
| 17 | 4606989 | 4607364 | KD2-H4K8ac_peak_11874 | 5.54647  | PELP1_ENSG00000141456;RP11-314A20.2_ENSG00000244184                                                         |
| 17 | 4612281 | 4612765 | KD2-H4K8ac_peak_11875 | 10.77651 |                                                                                                             |
| 17 | 4614032 | 4614376 | KD2-H4K8ac_peak_11876 | 11.86082 | ARRB2_ENSG00000141480                                                                                       |
| 17 | 4634190 | 4634479 | KD2-H4K8ac_peak_11877 | 4.06758  | MED11_ENSG00000161920                                                                                       |
| 17 | 4693096 | 4693675 | KD2-H4K8ac_peak_11878 | 13.80019 |                                                                                                             |
| 17 | 4698845 | 4699225 | KD2-H4K8ac_peak_11879 | 12.86276 | PSMB6_ENSG00000142507                                                                                       |
| 17 | 4709966 | 4710295 | KD2-H4K8ac_peak_11880 | 16.8435  | RP11-81A22.5_ENSG00000262165;PLD2_ENSG00000129219                                                           |
| 17 | 4711045 | 4711259 | KD2-H4K8ac_peak_11881 | 7.07117  | RP11-81A22.5_ENSG00000262165;PLD2_ENSG00000129219                                                           |
| 17 | 4736721 | 4737164 | KD2-H4K8ac_peak_11882 | 15.58442 | MINK1_ENSG00000141503                                                                                       |
| 17 | 4811713 | 4811947 | KD2-H4K8ac_peak_11883 | 4.86324  |                                                                                                             |
| 17 | 4812643 | 4813130 | KD2-H4K8ac_peak_11884 | 7.13615  |                                                                                                             |
| 17 | 4837553 | 4837777 | KD2-H4K8ac_peak_11885 | 6.66692  |                                                                                                             |
| 17 | 4842951 | 4843184 | KD2-H4K8ac_peak_11886 | 8.4716   | SLC25A11_ENSG00000108528;RNF167_ENSG00000108523                                                             |
| 17 | 4843507 | 4843823 | KD2-H4K8ac_peak_11887 | 15.25814 | SLC25A11_ENSG00000108528;RNF167_ENSG00000108523                                                             |
| 17 | 4850897 | 4851720 | KD2-H4K8ac_peak_11888 | 13.81781 | PFN1_ENSG00000108518;ENO3_ENSG00000108515                                                                   |
| 17 | 4852447 | 4854439 | KD2-H4K8ac_peak_11889 | 17.43561 | PFN1_ENSG00000108518                                                                                        |
| 17 | 4869865 | 4870354 | KD2-H4K8ac_peak_11890 | 15.76765 | SPAG7_ENSG00000091640;RP5-1050D4.3_ENSG00000262429                                                          |
| 17 | 4870885 | 4871106 | KD2-H4K8ac_peak_11891 | 8.2413   | SPAG7_ENSG00000091640;RP5-1050D4.3_ENSG00000262429                                                          |
| 17 | 4871512 | 4872534 | KD2-H4K8ac_peak_11892 | 8.16906  | SPAG7_ENSG00000091640;RP5-1050D4.3_ENSG00000262429                                                          |
| 17 | 4890117 | 4890828 | KD2-H4K8ac_peak_11893 | 9.34195  | CAMTA2_ENSG00000108509;RP5-1050D4.4_ENSG00000262678;AC004771.1_ENSG00000203562;RP5-1050D4.5_ENSG00000262227 |
| 17 | 4891115 | 4891435 | KD2-H4K8ac_peak_11894 | 5.9696   | CAMTA2_ENSG00000108509;AC004771.1_ENSG00000203562;RP5-1050D4.5_ENSG00000262227                              |
| 17 | 4900360 | 4901137 | KD2-H4K8ac_peak_11895 | 15.82362 | INCA1_ENSG00000196388;KIF1C_ENSG00000129250                                                                 |
| 17 | 4934561 | 4935412 | KD2-H4K8ac_peak_11896 | 13.81781 |                                                                                                             |
| 17 | 4938644 | 4938846 | KD2-H4K8ac_peak_11897 | 4.37709  |                                                                                                             |
| 17 | 4980741 | 4982203 | KD2-H4K8ac_peak_11898 | 16.8435  | RP11-46I8.3_ENSG00000262693;ZFP3_ENSG00000180787                                                            |
| 17 | 5014719 | 5015051 | KD2-H4K8ac_peak_11899 | 9.048    | AC012146.7_ENSG00000234327                                                                                  |
| 17 | 5015641 | 5016184 | KD2-H4K8ac_peak_11900 | 4.04573  | AC012146.7_ENSG00000234327                                                                                  |
| 17 | 5094796 | 5095122 | KD2-H4K8ac_peak_11901 | 15.20126 | ZNF594_ENSG00000180626;RP11-333E1.1_ENSG00000261879                                                         |
| 17 | 5095378 | 5095796 | KD2-H4K8ac_peak_11902 | 7.146    | ZNF594_ENSG00000180626;RP11-333E1.1_ENSG00000261879                                                         |
| 17 | 5175740 | 5175977 | KD2-H4K8ac_peak_11903 | 5.73839  |                                                                                                             |
| 17 | 5323321 | 5323802 | KD2-H4K8ac_peak_11904 | 14.275   | NUP88_ENSG00000108559;RPAIN_ENSG00000129197                                                                 |
| 17 | 5372536 | 5372865 | KD2-H4K8ac_peak_11905 | 9.95119  | DHX33_ENSG00000005100;CTC-524C5.5_ENSG00000262099                                                           |
| 17 | 5389877 | 5390149 | KD2-H4K8ac_peak_11906 | 14.68449 | DERL2_ENSG00000072849;MIS12_ENSG00000167842                                                                 |
| 17 | 6346501 | 6346978 | KD2-H4K8ac_peak_11907 | 11.49574 | FAM64A_ENSG00000129195                                                                                      |
| 17 | 6358063 | 6358727 | KD2-H4K8ac_peak_11908 | 10.05606 |                                                                                                             |
| 17 | 6543122 | 6544241 | KD2-H4K8ac_peak_11909 | 15.61313 | KIAA0753_ENSG00000198920;TXNDC17_ENSG00000129235                                                            |
| 17 | 6555109 | 6555893 | KD2-H4K8ac_peak_11910 | 33.59052 | MED31_ENSG00000108590;C17orf100_ENSG00000212734;AC004706.1_ENSG00000256806                                  |
| 17 | 6915393 | 6916422 | KD2-H4K8ac_peak_11911 | 5.75757  | AC027763.2_ENSG00000215067;RNASEK_ENSG00000219200;RNASEK-C17orf49_ENSG00000161939                           |
| 17 | 6917423 | 6917920 | KD2-H4K8ac_peak_11912 | 13.56049 | AC040977.1_ENSG00000269871;C17orf49_ENSG00000258315                                                         |

|    |         |         |                       |          |                                                                                                            |
|----|---------|---------|-----------------------|----------|------------------------------------------------------------------------------------------------------------|
| 17 | 6921604 | 6922046 | KD2-H4K8ac_peak_11913 | 11.43353 | RP11-589P10.7_ENSG00000267047;MIR497HG_ENSG00000267532                                                     |
| 17 | 6922652 | 6923813 | KD2-H4K8ac_peak_11914 | 20.01779 | RP11-589P10.7_ENSG00000267047;MIR497HG_ENSG00000267532                                                     |
| 17 | 6925198 | 6925707 | KD2-H4K8ac_peak_11915 | 6.25869  | BCL6B_ENSG00000161940                                                                                      |
| 17 | 6938619 | 6939015 | KD2-H4K8ac_peak_11916 | 5.88845  | SLC16A13_ENSG00000174327                                                                                   |
| 17 | 6939343 | 6939881 | KD2-H4K8ac_peak_11917 | 11.66477 | SLC16A13_ENSG00000174327                                                                                   |
| 17 | 6945513 | 6945793 | KD2-H4K8ac_peak_11918 | 4.40093  |                                                                                                            |
| 17 | 6946785 | 6947557 | KD2-H4K8ac_peak_11919 | 6.5996   | SLC16A11_ENSG00000174326                                                                                   |
| 17 | 7080386 | 7080870 | KD2-H4K8ac_peak_11920 | 6.90231  |                                                                                                            |
| 17 | 7081070 | 7081920 | KD2-H4K8ac_peak_11921 | 8.52559  | ASGR1_ENSG00000141505                                                                                      |
| 17 | 7107651 | 7107888 | KD2-H4K8ac_peak_11922 | 11.07495 |                                                                                                            |
| 17 | 7121039 | 7121769 | KD2-H4K8ac_peak_11923 | 22.94649 | ACADVL_ENSG00000072778                                                                                     |
| 17 | 7122714 | 7123004 | KD2-H4K8ac_peak_11924 | 5.54647  | DLG4_ENSG00000132535                                                                                       |
| 17 | 7123310 | 7123997 | KD2-H4K8ac_peak_11925 | 14.22723 | DLG4_ENSG00000132535                                                                                       |
| 17 | 7141264 | 7141508 | KD2-H4K8ac_peak_11926 | 20.58734 |                                                                                                            |
| 17 | 7142071 | 7142794 | KD2-H4K8ac_peak_11927 | 22.76112 | PHF23_ENSG00000040633                                                                                      |
| 17 | 7145386 | 7145632 | KD2-H4K8ac_peak_11928 | 7.76329  | GABARAP_ENSG00000170296                                                                                    |
| 17 | 7154490 | 7155289 | KD2-H4K8ac_peak_11929 | 22.39508 | CTDNEP1_ENSG00000175826;ELP5_ENSG00000170291                                                               |
| 17 | 7155523 | 7156098 | KD2-H4K8ac_peak_11930 | 9.95119  | CTDNEP1_ENSG00000175826;ELP5_ENSG00000170291                                                               |
| 17 | 7164322 | 7164942 | KD2-H4K8ac_peak_11931 | 12.70959 | RP1-4G17.5_ENSG00000262302                                                                                 |
| 17 | 7197630 | 7197924 | KD2-H4K8ac_peak_11932 | 8.55271  | YBX2_ENSG00000006047                                                                                       |
| 17 | 7198212 | 7198565 | KD2-H4K8ac_peak_11933 | 19.559   | YBX2_ENSG00000006047                                                                                       |
| 17 | 7199732 | 7200198 | KD2-H4K8ac_peak_11934 | 4.67342  |                                                                                                            |
| 17 | 7209559 | 7210109 | KD2-H4K8ac_peak_11935 | 8.59579  | EIF5A_ENSG00000132507                                                                                      |
| 17 | 7210988 | 7211843 | KD2-H4K8ac_peak_11936 | 17.70889 | EIF5A_ENSG00000132507                                                                                      |
| 17 | 7218150 | 7219582 | KD2-H4K8ac_peak_11937 | 14.68449 | GPS2_ENSG00000132522                                                                                       |
| 17 | 7233515 | 7234272 | KD2-H4K8ac_peak_11938 | 22.21705 | NEURL4_ENSG00000215041;AC026954.6_ENSG00000224647                                                          |
| 17 | 7254393 | 7255778 | KD2-H4K8ac_peak_11939 | 9.67696  | KCTD11_ENSG00000213859                                                                                     |
| 17 | 7284102 | 7284529 | KD2-H4K8ac_peak_11940 | 6.66692  | TNK1_ENSG00000174292                                                                                       |
| 17 | 7286950 | 7288225 | KD2-H4K8ac_peak_11941 | 15.01306 |                                                                                                            |
| 17 | 7297988 | 7298304 | KD2-H4K8ac_peak_11942 | 6.84261  |                                                                                                            |
| 17 | 7307984 | 7309316 | KD2-H4K8ac_peak_11943 | 8.94469  | TMEM256-PLSCR3_ENSG00000187838;C17orf61-PLSCR3_ENSG00000262481;TMEM256_ENSG00000205544;NLGN2_ENSG000001699 |
| 17 | 7339182 | 7339547 | KD2-H4K8ac_peak_11944 | 7.40314  | TMEM102_ENSG00000181284                                                                                    |
| 17 | 7342875 | 7344358 | KD2-H4K8ac_peak_11945 | 11.98173 | RP11-104H15.10_ENSG00000272884                                                                             |
| 17 | 7358299 | 7358699 | KD2-H4K8ac_peak_11946 | 7.96322  |                                                                                                            |
| 17 | 7358942 | 7359243 | KD2-H4K8ac_peak_11947 | 7.47462  |                                                                                                            |
| 17 | 7382500 | 7382836 | KD2-H4K8ac_peak_11948 | 18.80827 |                                                                                                            |
| 17 | 7383074 | 7383914 | KD2-H4K8ac_peak_11949 | 9.36516  | SLC35G6_ENSG00000259224                                                                                    |
| 17 | 7386483 | 7386717 | KD2-H4K8ac_peak_11950 | 6.67538  | ZBTB4_ENSG00000174282;POLR2A_ENSG00000181222                                                               |
| 17 | 7451633 | 7452809 | KD2-H4K8ac_peak_11951 | 21.50391 | TNFSF12_ENSG00000239697;TNFSF12-TNFSF13_ENSG00000248871                                                    |
| 17 | 7460361 | 7460908 | KD2-H4K8ac_peak_11952 | 6.56211  | TNFSF13_ENSG00000161955                                                                                    |
| 17 | 7461291 | 7461574 | KD2-H4K8ac_peak_11953 | 5.9696   | TNFSF13_ENSG00000161955                                                                                    |
| 17 | 7464711 | 7465095 | KD2-H4K8ac_peak_11954 | 8.4716   | SEN3_ENSG00000161956                                                                                       |
| 17 | 7465335 | 7465713 | KD2-H4K8ac_peak_11955 | 12.37938 | SEN3_ENSG00000161956;SEN3-EIF4A1_ENSG00000265500                                                           |
| 17 | 7476250 | 7477038 | KD2-H4K8ac_peak_11956 | 7.70067  | EIF4A1_ENSG00000161960;SNORA67_ENSG00000264772;SNORA48_ENSG00000209582                                     |
| 17 | 7486240 | 7486985 | KD2-H4K8ac_peak_11957 | 26.15791 | AC113189.5_ENSG00000233223;MPDU1_ENSG00000129255                                                           |
| 17 | 7487714 | 7488003 | KD2-H4K8ac_peak_11958 | 5.14125  | AC113189.5_ENSG00000233223;MPDU1_ENSG00000129255                                                           |



|    |         |         |                       |          |                                                                           |
|----|---------|---------|-----------------------|----------|---------------------------------------------------------------------------|
| 17 | 7518674 | 7518924 | KD2-H4K8ac_peak_11959 | 16.87121 | FXR2_ENSG00000129245                                                      |
| 17 | 7553701 | 7553894 | KD2-H4K8ac_peak_11960 | 10.08707 |                                                                           |
| 17 | 7554683 | 7555275 | KD2-H4K8ac_peak_11961 | 9.96798  |                                                                           |
| 17 | 7589794 | 7590769 | KD2-H4K8ac_peak_11962 | 8.55271  | TP53_ENSG00000141510;RP11-199F11.2_ENSG00000262251;WRAP53_ENSG00000141499 |
| 17 | 7591766 | 7592127 | KD2-H4K8ac_peak_11963 | 7.49599  | TP53_ENSG00000141510                                                      |
| 17 | 7608557 | 7608867 | KD2-H4K8ac_peak_11964 | 8.88082  | EFNB3_ENSG00000108947                                                     |
| 17 | 7619158 | 7620464 | KD2-H4K8ac_peak_11965 | 5.54647  | DNAH2_ENSG00000183914                                                     |
| 17 | 7620687 | 7620913 | KD2-H4K8ac_peak_11966 | 5.88845  | DNAH2_ENSG00000183914                                                     |
| 17 | 7746486 | 7746712 | KD2-H4K8ac_peak_11967 | 8.42997  |                                                                           |
| 17 | 7760018 | 7760254 | KD2-H4K8ac_peak_11968 | 5.54647  | CYB5D1_ENSG00000182224                                                    |
| 17 | 7786116 | 7786537 | KD2-H4K8ac_peak_11969 | 5.54647  |                                                                           |
| 17 | 7788218 | 7790144 | KD2-H4K8ac_peak_11970 | 21.11201 | LSMD1_ENSG00000183011;CHD3_ENSG00000170004                                |
| 17 | 7791193 | 7792176 | KD2-H4K8ac_peak_11971 | 15.58442 |                                                                           |
| 17 | 7819158 | 7819933 | KD2-H4K8ac_peak_11972 | 18.37277 | AC025335.1_ENSG00000179859                                                |
| 17 | 7832602 | 7833059 | KD2-H4K8ac_peak_11973 | 8.37231  | KCNAB3_ENSG00000170049;RP11-1099M24.7_ENSG00000262730                     |
| 17 | 7835594 | 7835923 | KD2-H4K8ac_peak_11974 | 12.00273 | TRAPPC1_ENSG00000170043;CNTROB_ENSG00000170037                            |
| 17 | 7891803 | 7892135 | KD2-H4K8ac_peak_11975 | 6.36319  |                                                                           |
| 17 | 7893255 | 7893504 | KD2-H4K8ac_peak_11976 | 7.92775  |                                                                           |
| 17 | 7919274 | 7920058 | KD2-H4K8ac_peak_11977 | 6.25869  |                                                                           |
| 17 | 7982944 | 7983334 | KD2-H4K8ac_peak_11978 | 5.08628  | AC129492.6_ENSG00000214999                                                |
| 17 | 8021061 | 8021301 | KD2-H4K8ac_peak_11979 | 8.55271  |                                                                           |
| 17 | 8054103 | 8054456 | KD2-H4K8ac_peak_11980 | 6.16747  |                                                                           |
| 17 | 8066596 | 8067865 | KD2-H4K8ac_peak_11981 | 15.59774 | RP11-599B13.6_ENSG00000263620;VAMP2_ENSG00000220205                       |
| 17 | 8079867 | 8080448 | KD2-H4K8ac_peak_11982 | 6.66692  | TMEM107_ENSG00000179029;RP11-599B13.7_ENSG00000266824                     |
| 17 | 8093903 | 8094110 | KD2-H4K8ac_peak_11983 | 5.20908  | C17orf59_ENSG00000196544                                                  |
| 17 | 8095852 | 8096108 | KD2-H4K8ac_peak_11984 | 9.12849  |                                                                           |
| 17 | 8113389 | 8113848 | KD2-H4K8ac_peak_11985 | 9.1707   | AURKB_ENSG00000178999                                                     |
| 17 | 8123461 | 8123712 | KD2-H4K8ac_peak_11986 | 3.75035  |                                                                           |
| 17 | 8125036 | 8125329 | KD2-H4K8ac_peak_11987 | 8.85813  |                                                                           |
| 17 | 8126334 | 8127574 | KD2-H4K8ac_peak_11988 | 8.82366  | LINC00324_ENSG00000178977                                                 |
| 17 | 8150985 | 8151270 | KD2-H4K8ac_peak_11989 | 11.05407 | CTC1_ENSG00000178971;PFAS_ENSG00000178921                                 |
| 17 | 8151910 | 8152330 | KD2-H4K8ac_peak_11990 | 7.69287  | CTC1_ENSG00000178971;PFAS_ENSG00000178921                                 |
| 17 | 8191325 | 8191519 | KD2-H4K8ac_peak_11991 | 6.13909  | RANGRF_ENSG00000108961                                                    |
| 17 | 8198240 | 8198604 | KD2-H4K8ac_peak_11992 | 7.96322  | SLC25A35_ENSG00000125434                                                  |
| 17 | 8198885 | 8199509 | KD2-H4K8ac_peak_11993 | 14.66631 | SLC25A35_ENSG00000125434                                                  |
| 17 | 8207849 | 8208043 | KD2-H4K8ac_peak_11994 | 4.65111  |                                                                           |
| 17 | 8230138 | 8230414 | KD2-H4K8ac_peak_11995 | 6.99815  |                                                                           |
| 17 | 8250406 | 8250933 | KD2-H4K8ac_peak_11996 | 8.17902  |                                                                           |
| 17 | 8279432 | 8279930 | KD2-H4K8ac_peak_11997 | 5.9696   | KRBA2_ENSG00000184619                                                     |
| 17 | 8286095 | 8286352 | KD2-H4K8ac_peak_11998 | 6.56926  | RP11-849F2.7_ENSG00000263809;RPL26_ENSG00000161970                        |
| 17 | 8286677 | 8287689 | KD2-H4K8ac_peak_11999 | 14.15075 | RP11-849F2.7_ENSG00000263809;RPL26_ENSG00000161970                        |
| 17 | 8338723 | 8338941 | KD2-H4K8ac_peak_12000 | 9.96798  |                                                                           |
| 17 | 8339328 | 8339623 | KD2-H4K8ac_peak_12001 | 5.4919   |                                                                           |
| 17 | 8467732 | 8467939 | KD2-H4K8ac_peak_12002 | 6.82976  |                                                                           |
| 17 | 8532751 | 8533337 | KD2-H4K8ac_peak_12003 | 12.84642 | MYH10_ENSG00000133026                                                     |
| 17 | 8534454 | 8534911 | KD2-H4K8ac_peak_12004 | 8.10216  | MYH10_ENSG00000133026                                                     |

|    |          |          |                       |          |                                                             |
|----|----------|----------|-----------------------|----------|-------------------------------------------------------------|
| 17 | 8583744  | 8583950  | KD2-H4K8ac_peak_12005 | 5.54647  |                                                             |
| 17 | 8585107  | 8585703  | KD2-H4K8ac_peak_12006 | 11.10075 |                                                             |
| 17 | 8601544  | 8601998  | KD2-H4K8ac_peak_12007 | 7.01494  |                                                             |
| 17 | 8649647  | 8649855  | KD2-H4K8ac_peak_12008 | 7.27716  |                                                             |
| 17 | 9144559  | 9144782  | KD2-H4K8ac_peak_12009 | 3.75035  |                                                             |
| 17 | 9478814  | 9479070  | KD2-H4K8ac_peak_12010 | 9.1707   | STX8_ENSG00000170310;WDR16_ENSG00000166596                  |
| 17 | 10018730 | 10019077 | KD2-H4K8ac_peak_12011 | 12.81138 |                                                             |
| 17 | 10030979 | 10031481 | KD2-H4K8ac_peak_12012 | 7.40111  |                                                             |
| 17 | 10600448 | 10600777 | KD2-H4K8ac_peak_12013 | 6.66692  | SCO1_ENSG00000133028;ADPRM_ENSG00000170222                  |
| 17 | 10632777 | 10633448 | KD2-H4K8ac_peak_12014 | 12.08081 | TMEM220_ENSG00000187824;CTC-297N7.5_ENSG00000263400         |
| 17 | 10652806 | 10653259 | KD2-H4K8ac_peak_12015 | 6.31143  |                                                             |
| 17 | 10654672 | 10654955 | KD2-H4K8ac_peak_12016 | 5.52329  |                                                             |
| 17 | 10748030 | 10748388 | KD2-H4K8ac_peak_12017 | 5.25071  |                                                             |
| 17 | 11900356 | 11900750 | KD2-H4K8ac_peak_12018 | 13.92307 | ZNF18_ENSG00000154957                                       |
| 17 | 11900966 | 11901573 | KD2-H4K8ac_peak_12019 | 16.94317 | ZNF18_ENSG00000154957                                       |
| 17 | 11924324 | 11924633 | KD2-H4K8ac_peak_12020 | 14.66631 | RPL21P122_ENSG00000241185;MAP2K4_ENSG00000065559            |
| 17 | 12692803 | 12693035 | KD2-H4K8ac_peak_12021 | 9.1707   | RP11-1090M7.1_ENSG00000265489;ARHGAP44_ENSG00000006740      |
| 17 | 12920871 | 12921325 | KD2-H4K8ac_peak_12022 | 9.89126  | ELAC2_ENSG00000006744                                       |
| 17 | 13972267 | 13972673 | KD2-H4K8ac_peak_12023 | 7.95563  | COX10-AS1_ENSG00000236088;COX10_ENSG00000006695             |
| 17 | 13972929 | 13973127 | KD2-H4K8ac_peak_12024 | 6.40683  | COX10-AS1_ENSG00000236088;COX10_ENSG00000006695             |
| 17 | 15163866 | 15164566 | KD2-H4K8ac_peak_12025 | 11.03331 | RP11-849N15.1_ENSG00000265445                               |
| 17 | 15197441 | 15197726 | KD2-H4K8ac_peak_12026 | 9.50015  |                                                             |
| 17 | 15244589 | 15244888 | KD2-H4K8ac_peak_12027 | 5.25071  | TEKT3_ENSG00000125409                                       |
| 17 | 15301316 | 15301601 | KD2-H4K8ac_peak_12028 | 8.23274  |                                                             |
| 17 | 15302457 | 15303397 | KD2-H4K8ac_peak_12029 | 8.55271  |                                                             |
| 17 | 15405758 | 15405975 | KD2-H4K8ac_peak_12030 | 6.8836   | CDRT4_ENSG00000239704                                       |
| 17 | 15443156 | 15443418 | KD2-H4K8ac_peak_12031 | 6.25869  |                                                             |
| 17 | 15466535 | 15466772 | KD2-H4K8ac_peak_12032 | 8.17902  | TVP23C-CDRT4_ENSG00000259024;TVP23C_ENSG00000175106         |
| 17 | 15554252 | 15554963 | KD2-H4K8ac_peak_12033 | 8.55271  | RP11-385D13.1_ENSG00000251537;RP11-640I15.1_ENSG00000266261 |
| 17 | 15586932 | 15587952 | KD2-H4K8ac_peak_12034 | 17.27647 | TRIM16_ENSG00000221926                                      |
| 17 | 15672835 | 15673209 | KD2-H4K8ac_peak_12035 | 4.44748  |                                                             |
| 17 | 15689561 | 15690019 | KD2-H4K8ac_peak_12036 | 9.36516  | MEIS3P1_ENSG00000179277                                     |
| 17 | 15847729 | 15848949 | KD2-H4K8ac_peak_12037 | 12.99417 | ADORA2B_ENSG00000170425                                     |
| 17 | 16118426 | 16119886 | KD2-H4K8ac_peak_12038 | 14.275   |                                                             |
| 17 | 16120252 | 16120957 | KD2-H4K8ac_peak_12039 | 10.43145 | NCOR1_ENSG00000141027                                       |
| 17 | 16256237 | 16256570 | KD2-H4K8ac_peak_12040 | 8.30974  | CENPV_ENSG00000166582                                       |
| 17 | 16283458 | 16283881 | KD2-H4K8ac_peak_12041 | 8.79106  | UBB_ENSG00000170315                                         |
| 17 | 16290356 | 16290911 | KD2-H4K8ac_peak_12042 | 7.44324  |                                                             |
| 17 | 16310172 | 16310653 | KD2-H4K8ac_peak_12043 | 9.36516  |                                                             |
| 17 | 16311343 | 16311668 | KD2-H4K8ac_peak_12044 | 8.85813  |                                                             |
| 17 | 16312121 | 16312326 | KD2-H4K8ac_peak_12045 | 8.1718   |                                                             |
| 17 | 16322110 | 16322568 | KD2-H4K8ac_peak_12046 | 5.57044  |                                                             |
| 17 | 16331637 | 16331841 | KD2-H4K8ac_peak_12047 | 6.65673  | AC093484.4_ENSG00000239203                                  |
| 17 | 16341240 | 16341463 | KD2-H4K8ac_peak_12048 | 7.99241  | FAM211A-AS1_ENSG00000175061                                 |
| 17 | 16341688 | 16341894 | KD2-H4K8ac_peak_12049 | 5.4919   | FAM211A-AS1_ENSG00000175061                                 |
| 17 | 16342430 | 16342726 | KD2-H4K8ac_peak_12050 | 7.59794  | FAM211A-AS1_ENSG00000175061                                 |

|    |          |          |                       |          |                                                                                |
|----|----------|----------|-----------------------|----------|--------------------------------------------------------------------------------|
| 17 | 16354003 | 16354195 | KD2-H4K8ac_peak_12051 | 4.35346  |                                                                                |
| 17 | 16389511 | 16389859 | KD2-H4K8ac_peak_12052 | 8.56219  |                                                                                |
| 17 | 16390901 | 16391127 | KD2-H4K8ac_peak_12053 | 5.60968  |                                                                                |
| 17 | 16395130 | 16395392 | KD2-H4K8ac_peak_12054 | 8.17902  | FAM211A_ENSG00000181350                                                        |
| 17 | 16395656 | 16395958 | KD2-H4K8ac_peak_12055 | 9.31907  | FAM211A_ENSG00000181350                                                        |
| 17 | 16424175 | 16424399 | KD2-H4K8ac_peak_12056 | 7.47462  |                                                                                |
| 17 | 16439423 | 16440120 | KD2-H4K8ac_peak_12057 | 10.46264 |                                                                                |
| 17 | 16472039 | 16472480 | KD2-H4K8ac_peak_12058 | 13.77586 | ZNF287_ENSG00000141040                                                         |
| 17 | 16487876 | 16488169 | KD2-H4K8ac_peak_12059 | 3.97079  |                                                                                |
| 17 | 16556622 | 16557087 | KD2-H4K8ac_peak_12060 | 20.42458 | ZNF624_ENSG00000197566;RP11-92B11.4_ENSG00000264765                            |
| 17 | 16883673 | 16883894 | KD2-H4K8ac_peak_12061 | 8.1233   | AC104024.1_ENSG00000230709                                                     |
| 17 | 16905363 | 16905682 | KD2-H4K8ac_peak_12062 | 10.46264 |                                                                                |
| 17 | 16912230 | 16912460 | KD2-H4K8ac_peak_12063 | 5.88845  |                                                                                |
| 17 | 16928592 | 16929017 | KD2-H4K8ac_peak_12064 | 6.76298  |                                                                                |
| 17 | 16931386 | 16932908 | KD2-H4K8ac_peak_12065 | 10.43145 |                                                                                |
| 17 | 16934256 | 16934685 | KD2-H4K8ac_peak_12066 | 7.76329  |                                                                                |
| 17 | 16935218 | 16935889 | KD2-H4K8ac_peak_12067 | 6.0073   |                                                                                |
| 17 | 16940002 | 16940322 | KD2-H4K8ac_peak_12068 | 11.22681 |                                                                                |
| 17 | 16979406 | 16979631 | KD2-H4K8ac_peak_12069 | 3.99369  |                                                                                |
| 17 | 17109129 | 17109472 | KD2-H4K8ac_peak_12070 | 7.76104  | PLD6_ENSG00000179598                                                           |
| 17 | 17140236 | 17140733 | KD2-H4K8ac_peak_12071 | 21.6161  | RP11-45M22.4_ENSG00000264187;FLCN_ENSG00000154803;RP11-45M22.5_ENSG00000266498 |
| 17 | 17184214 | 17184525 | KD2-H4K8ac_peak_12072 | 17.8868  | COPS3_ENSG00000141030                                                          |
| 17 | 17206713 | 17207349 | KD2-H4K8ac_peak_12073 | 15.81711 | NT5M_ENSG00000205309                                                           |
| 17 | 17254693 | 17255820 | KD2-H4K8ac_peak_12074 | 15.039   |                                                                                |
| 17 | 17289049 | 17289405 | KD2-H4K8ac_peak_12075 | 8.6308   |                                                                                |
| 17 | 17306887 | 17307716 | KD2-H4K8ac_peak_12076 | 7.76329  |                                                                                |
| 17 | 17379456 | 17380068 | KD2-H4K8ac_peak_12077 | 14.74047 | MED9_ENSG00000141026                                                           |
| 17 | 17380377 | 17380794 | KD2-H4K8ac_peak_12078 | 8.55271  | MED9_ENSG00000141026                                                           |
| 17 | 17399362 | 17400683 | KD2-H4K8ac_peak_12079 | 19.559   | RASD1_ENSG00000108551                                                          |
| 17 | 17418089 | 17418775 | KD2-H4K8ac_peak_12080 | 5.13615  |                                                                                |
| 17 | 17470720 | 17470922 | KD2-H4K8ac_peak_12081 | 8.02571  |                                                                                |
| 17 | 17494239 | 17494957 | KD2-H4K8ac_peak_12082 | 11.05467 | PEMT_ENSG00000133027;RP11-524F11.2_ENSG00000264666                             |
| 17 | 17495265 | 17495886 | KD2-H4K8ac_peak_12083 | 11.92978 | PEMT_ENSG00000133027;RP11-524F11.2_ENSG00000264666                             |
| 17 | 17566522 | 17566985 | KD2-H4K8ac_peak_12084 | 6.2781   |                                                                                |
| 17 | 17584774 | 17586263 | KD2-H4K8ac_peak_12085 | 11.79585 | RAI1_ENSG00000108557                                                           |
| 17 | 17588587 | 17588812 | KD2-H4K8ac_peak_12086 | 6.66692  |                                                                                |
| 17 | 17589371 | 17589809 | KD2-H4K8ac_peak_12087 | 8.17902  |                                                                                |
| 17 | 17596451 | 17597012 | KD2-H4K8ac_peak_12088 | 11.89502 |                                                                                |
| 17 | 17597286 | 17598106 | KD2-H4K8ac_peak_12089 | 14.68449 |                                                                                |
| 17 | 17641281 | 17641473 | KD2-H4K8ac_peak_12090 | 5.23279  |                                                                                |
| 17 | 17641907 | 17642212 | KD2-H4K8ac_peak_12091 | 6.66692  |                                                                                |
| 17 | 17643081 | 17643582 | KD2-H4K8ac_peak_12092 | 6.67092  |                                                                                |
| 17 | 17647494 | 17647703 | KD2-H4K8ac_peak_12093 | 3.75035  |                                                                                |
| 17 | 17649152 | 17649568 | KD2-H4K8ac_peak_12094 | 6.20282  |                                                                                |
| 17 | 17652145 | 17652344 | KD2-H4K8ac_peak_12095 | 6.84261  |                                                                                |
| 17 | 17652706 | 17653188 | KD2-H4K8ac_peak_12096 | 6.30607  |                                                                                |

|    |          |          |                       |          |                                             |
|----|----------|----------|-----------------------|----------|---------------------------------------------|
| 17 | 17655932 | 17656283 | KD2-H4K8ac_peak_12097 | 8.70496  |                                             |
| 17 | 17673040 | 17673313 | KD2-H4K8ac_peak_12098 | 7.13615  | RAI1-AS1_ENSG00000237328                    |
| 17 | 17685519 | 17685798 | KD2-H4K8ac_peak_12099 | 8.86099  |                                             |
| 17 | 17686022 | 17686244 | KD2-H4K8ac_peak_12100 | 14.06758 |                                             |
| 17 | 17686850 | 17687086 | KD2-H4K8ac_peak_12101 | 13.15684 |                                             |
| 17 | 17687489 | 17687708 | KD2-H4K8ac_peak_12102 | 7.74434  |                                             |
| 17 | 17691143 | 17691430 | KD2-H4K8ac_peak_12103 | 4.67342  |                                             |
| 17 | 17693103 | 17693681 | KD2-H4K8ac_peak_12104 | 20.79845 |                                             |
| 17 | 17694096 | 17695361 | KD2-H4K8ac_peak_12105 | 17.8868  |                                             |
| 17 | 17725838 | 17726123 | KD2-H4K8ac_peak_12106 | 8.79106  |                                             |
| 17 | 17727369 | 17727790 | KD2-H4K8ac_peak_12107 | 11.47352 |                                             |
| 17 | 17735041 | 17735921 | KD2-H4K8ac_peak_12108 | 8.93761  |                                             |
| 17 | 17739000 | 17739407 | KD2-H4K8ac_peak_12109 | 10.30284 | SREBF1_ENSG00000072310                      |
| 17 | 17739753 | 17741185 | KD2-H4K8ac_peak_12110 | 20.76319 | SREBF1_ENSG00000072310                      |
| 17 | 17742973 | 17743407 | KD2-H4K8ac_peak_12111 | 5.32397  |                                             |
| 17 | 17743663 | 17744244 | KD2-H4K8ac_peak_12112 | 7.76104  |                                             |
| 17 | 17749364 | 17749973 | KD2-H4K8ac_peak_12113 | 10.19949 |                                             |
| 17 | 17776823 | 17777034 | KD2-H4K8ac_peak_12114 | 5.57044  |                                             |
| 17 | 17780698 | 17780943 | KD2-H4K8ac_peak_12115 | 4.8485   |                                             |
| 17 | 17781230 | 17781857 | KD2-H4K8ac_peak_12116 | 5.66705  |                                             |
| 17 | 17804362 | 17804942 | KD2-H4K8ac_peak_12117 | 8.23274  |                                             |
| 17 | 17815419 | 17815699 | KD2-H4K8ac_peak_12118 | 13.09607 |                                             |
| 17 | 17825184 | 17825680 | KD2-H4K8ac_peak_12119 | 4.77079  |                                             |
| 17 | 17911799 | 17912111 | KD2-H4K8ac_peak_12120 | 7.27716  |                                             |
| 17 | 17929331 | 17929530 | KD2-H4K8ac_peak_12121 | 6.45018  |                                             |
| 17 | 17990592 | 17991062 | KD2-H4K8ac_peak_12122 | 10.87093 | DRG2_ENSG00000108591                        |
| 17 | 17991321 | 17991795 | KD2-H4K8ac_peak_12123 | 9.36516  | DRG2_ENSG00000108591                        |
| 17 | 18085615 | 18086551 | KD2-H4K8ac_peak_12124 | 13.87818 | ALKBH5_ENSG00000091542                      |
| 17 | 18127900 | 18128610 | KD2-H4K8ac_peak_12125 | 12.88108 |                                             |
| 17 | 18162216 | 18162543 | KD2-H4K8ac_peak_12126 | 4.8485   | FLII_ENSG00000177731                        |
| 17 | 18164132 | 18164391 | KD2-H4K8ac_peak_12127 | 4.06758  | MIEF2_ENSG00000177427                       |
| 17 | 18217653 | 18218236 | KD2-H4K8ac_peak_12128 | 7.36799  | TOP3A_ENSG00000177302;SMCR8_ENSG00000176994 |
| 17 | 18218436 | 18219178 | KD2-H4K8ac_peak_12129 | 17.42905 | TOP3A_ENSG00000177302;SMCR8_ENSG00000176994 |
| 17 | 18280624 | 18281013 | KD2-H4K8ac_peak_12130 | 6.56926  | EVPLL_ENSG00000214860                       |
| 17 | 18314849 | 18315208 | KD2-H4K8ac_peak_12131 | 9.1707   | RP1-37N7.3_ENSG00000220161                  |
| 17 | 18585166 | 18585547 | KD2-H4K8ac_peak_12132 | 12.36441 | ZNF286B_ENSG00000249459                     |
| 17 | 18601424 | 18601843 | KD2-H4K8ac_peak_12133 | 7.67504  | TRIM16L_ENSG00000108448                     |
| 17 | 18684620 | 18684866 | KD2-H4K8ac_peak_12134 | 7.76104  | TVP23B_ENSG00000171928                      |
| 17 | 18761501 | 18762084 | KD2-H4K8ac_peak_12135 | 18.54875 |                                             |
| 17 | 19044757 | 19045002 | KD2-H4K8ac_peak_12136 | 17.14886 |                                             |
| 17 | 19140751 | 19141409 | KD2-H4K8ac_peak_12137 | 8.86099  |                                             |
| 17 | 19165153 | 19165469 | KD2-H4K8ac_peak_12138 | 6.0073   |                                             |
| 17 | 19265498 | 19265982 | KD2-H4K8ac_peak_12139 | 12.08081 |                                             |
| 17 | 19268673 | 19268917 | KD2-H4K8ac_peak_12140 | 4.86324  |                                             |
| 17 | 19280750 | 19281482 | KD2-H4K8ac_peak_12141 | 10.43145 | B9D1_ENSG00000108641;MAPK7_ENSG00000166484  |
| 17 | 19287073 | 19287996 | KD2-H4K8ac_peak_12142 | 11.09936 |                                             |

|    |          |          |                       |          |                                                                |
|----|----------|----------|-----------------------|----------|----------------------------------------------------------------|
| 17 | 19288386 | 19288767 | KD2-H4K8ac_peak_12143 | 10.43145 |                                                                |
| 17 | 19289144 | 19289470 | KD2-H4K8ac_peak_12144 | 4.06758  |                                                                |
| 17 | 19289934 | 19290218 | KD2-H4K8ac_peak_12145 | 9.36516  | MFAP4_ENSG00000166482                                          |
| 17 | 19291635 | 19292192 | KD2-H4K8ac_peak_12146 | 9.63487  |                                                                |
| 17 | 19294777 | 19295031 | KD2-H4K8ac_peak_12147 | 11.11133 |                                                                |
| 17 | 19304761 | 19305158 | KD2-H4K8ac_peak_12148 | 5.30799  |                                                                |
| 17 | 19313771 | 19314734 | KD2-H4K8ac_peak_12149 | 9.1707   | RNF112_ENSG00000128482                                         |
| 17 | 19314950 | 19315504 | KD2-H4K8ac_peak_12150 | 10.96455 | RNF112_ENSG00000128482;CTB-187M2.2_ENSG00000265126             |
| 17 | 19350605 | 19351133 | KD2-H4K8ac_peak_12151 | 11.05467 | RPS2P46_ENSG00000189343                                        |
| 17 | 19410538 | 19410767 | KD2-H4K8ac_peak_12152 | 7.01658  |                                                                |
| 17 | 19436769 | 19437013 | KD2-H4K8ac_peak_12153 | 4.7849   |                                                                |
| 17 | 19437210 | 19437700 | KD2-H4K8ac_peak_12154 | 4.86324  |                                                                |
| 17 | 19482697 | 19483771 | KD2-H4K8ac_peak_12155 | 10.19949 | AC025627.7_ENSG00000228983                                     |
| 17 | 19551082 | 19551884 | KD2-H4K8ac_peak_12156 | 12.93209 | ALDH3A2_ENSG00000072210                                        |
| 17 | 19647486 | 19648105 | KD2-H4K8ac_peak_12157 | 18.54875 |                                                                |
| 17 | 19648415 | 19648968 | KD2-H4K8ac_peak_12158 | 8.16906  |                                                                |
| 17 | 19665766 | 19665967 | KD2-H4K8ac_peak_12159 | 9.72244  |                                                                |
| 17 | 19770088 | 19771763 | KD2-H4K8ac_peak_12160 | 13.80019 | ULK2_ENSG00000083290                                           |
| 17 | 19880535 | 19881650 | KD2-H4K8ac_peak_12161 | 16.54484 | AKAP10_ENSG00000108599                                         |
| 17 | 19896337 | 19896715 | KD2-H4K8ac_peak_12162 | 10.43145 |                                                                |
| 17 | 19911969 | 19913278 | KD2-H4K8ac_peak_12163 | 17.19888 | RP11-209D14.2_ENSG00000261033;SPECC1_ENSG00000128487           |
| 17 | 19998444 | 19999023 | KD2-H4K8ac_peak_12164 | 6.40683  |                                                                |
| 17 | 20203243 | 20203676 | KD2-H4K8ac_peak_12165 | 9.16531  |                                                                |
| 17 | 20203876 | 20204077 | KD2-H4K8ac_peak_12166 | 6.66692  |                                                                |
| 17 | 20217292 | 20217625 | KD2-H4K8ac_peak_12167 | 5.64449  |                                                                |
| 17 | 20284920 | 20285588 | KD2-H4K8ac_peak_12168 | 5.73839  |                                                                |
| 17 | 20486802 | 20487182 | KD2-H4K8ac_peak_12169 | 5.73839  |                                                                |
| 17 | 20492186 | 20492620 | KD2-H4K8ac_peak_12170 | 9.72244  | MEIS3P2_ENSG00000188013                                        |
| 17 | 20755776 | 20756035 | KD2-H4K8ac_peak_12171 | 8.23274  |                                                                |
| 17 | 20811099 | 20811343 | KD2-H4K8ac_peak_12172 | 6.66692  |                                                                |
| 17 | 20811623 | 20811879 | KD2-H4K8ac_peak_12173 | 6.66692  |                                                                |
| 17 | 20945888 | 20946294 | KD2-H4K8ac_peak_12174 | 20.18584 | USP22_ENSG00000124422                                          |
| 17 | 20946787 | 20947067 | KD2-H4K8ac_peak_12175 | 19.11513 | USP22_ENSG00000124422                                          |
| 17 | 20979011 | 20979241 | KD2-H4K8ac_peak_12176 | 8.00457  | AC087393.1_ENSG00000236819                                     |
| 17 | 21029775 | 21030119 | KD2-H4K8ac_peak_12177 | 5.57044  |                                                                |
| 17 | 21030474 | 21030686 | KD2-H4K8ac_peak_12178 | 3.97079  |                                                                |
| 17 | 21098581 | 21098832 | KD2-H4K8ac_peak_12179 | 8.1331   |                                                                |
| 17 | 21116991 | 21117415 | KD2-H4K8ac_peak_12180 | 17.17257 | TMEM11_ENSG00000178307;AC087294.2_ENSG00000235530              |
| 17 | 21117715 | 21118388 | KD2-H4K8ac_peak_12181 | 6.99815  | TMEM11_ENSG00000178307;AC087294.2_ENSG00000235530              |
| 17 | 21156918 | 21157534 | KD2-H4K8ac_peak_12182 | 7.9076   | C17orf103_ENSG00000154035                                      |
| 17 | 21178845 | 21179084 | KD2-H4K8ac_peak_12183 | 8.16906  |                                                                |
| 17 | 21220092 | 21220831 | KD2-H4K8ac_peak_12184 | 10.44656 |                                                                |
| 17 | 21279753 | 21280042 | KD2-H4K8ac_peak_12185 | 5.557    | KCNJ12_ENSG00000184185                                         |
| 17 | 21414621 | 21414937 | KD2-H4K8ac_peak_12186 | 6.66692  |                                                                |
| 17 | 21454549 | 21454859 | KD2-H4K8ac_peak_12187 | 9.51625  | RP11-822E23.3_ENSG00000266673                                  |
| 17 | 21792428 | 21792834 | KD2-H4K8ac_peak_12188 | 12.25733 | RP11-1109M24.16_ENSG00000263609;RP11-1109M24.5_ENSG00000264956 |

|    |          |          |                       |          |                                                                            |
|----|----------|----------|-----------------------|----------|----------------------------------------------------------------------------|
| 17 | 21825341 | 21825723 | KD2-H4K8ac_peak_12189 | 4.86324  | FAM27L_ENSG00000178130;RP11-1109M24.14_ENSG00000264811                     |
| 17 | 25620400 | 25621399 | KD2-H4K8ac_peak_12190 | 10.87093 | MIR4522_ENSG00000263583;WSB1_ENSG00000109046                               |
| 17 | 25659496 | 25659919 | KD2-H4K8ac_peak_12191 | 9.34195  | RP11-173M1.4_ENSG00000266313                                               |
| 17 | 25660190 | 25660393 | KD2-H4K8ac_peak_12192 | 10.29842 | RP11-173M1.4_ENSG00000266313                                               |
| 17 | 25680271 | 25680868 | KD2-H4K8ac_peak_12193 | 25.10776 | RP11-173M1.5_ENSG00000265683                                               |
| 17 | 25681085 | 25681403 | KD2-H4K8ac_peak_12194 | 8.4716   |                                                                            |
| 17 | 25707060 | 25707330 | KD2-H4K8ac_peak_12195 | 8.10216  |                                                                            |
| 17 | 25707605 | 25708071 | KD2-H4K8ac_peak_12196 | 5.75757  |                                                                            |
| 17 | 25708429 | 25708701 | KD2-H4K8ac_peak_12197 | 5.63633  |                                                                            |
| 17 | 25782784 | 25783697 | KD2-H4K8ac_peak_12198 | 18.53838 | KSR1_ENSG00000141068                                                       |
| 17 | 25886722 | 25886958 | KD2-H4K8ac_peak_12199 | 4.86324  |                                                                            |
| 17 | 25887359 | 25887584 | KD2-H4K8ac_peak_12200 | 8.1718   |                                                                            |
| 17 | 25898362 | 25898567 | KD2-H4K8ac_peak_12201 | 4.211    |                                                                            |
| 17 | 25904325 | 25905090 | KD2-H4K8ac_peak_12202 | 12.30509 |                                                                            |
| 17 | 25912788 | 25913054 | KD2-H4K8ac_peak_12203 | 4.8888   |                                                                            |
| 17 | 25981463 | 25981742 | KD2-H4K8ac_peak_12204 | 8.5781   |                                                                            |
| 17 | 26120373 | 26121019 | KD2-H4K8ac_peak_12205 | 15.39543 |                                                                            |
| 17 | 26219907 | 26220270 | KD2-H4K8ac_peak_12206 | 13.73635 | RP1-66C13.4_ENSG00000266202                                                |
| 17 | 26554126 | 26554899 | KD2-H4K8ac_peak_12207 | 16.49944 | PYY2_ENSG00000237575                                                       |
| 17 | 26662837 | 26663065 | KD2-H4K8ac_peak_12208 | 9.20193  | IFT20_ENSG00000109083;TNFAIP1_ENSG00000109079                              |
| 17 | 26684016 | 26684489 | KD2-H4K8ac_peak_12209 | 9.06369  | POLDIP2_ENSG00000004142;TMEM199_ENSG00000244045;CTB-96E2.3_ENSG00000258924 |
| 17 | 26684724 | 26685073 | KD2-H4K8ac_peak_12210 | 9.95119  | POLDIP2_ENSG00000004142;TMEM199_ENSG00000244045;CTB-96E2.3_ENSG00000258924 |
| 17 | 26698759 | 26699511 | KD2-H4K8ac_peak_12211 | 14.8083  | VTN_ENSG00000109072                                                        |
| 17 | 26732382 | 26732685 | KD2-H4K8ac_peak_12212 | 4.0528   | CTD-2350C19.2_ENSG00000265254                                              |
| 17 | 26897866 | 26898445 | KD2-H4K8ac_peak_12213 | 6.30229  | PIGS_ENSG00000087111                                                       |
| 17 | 26971601 | 26972116 | KD2-H4K8ac_peak_12214 | 12.08081 | KIAA0100_ENSG00000007202                                                   |
| 17 | 26972375 | 26972735 | KD2-H4K8ac_peak_12215 | 8.85813  | KIAA0100_ENSG00000007202                                                   |
| 17 | 26988826 | 26989618 | KD2-H4K8ac_peak_12216 | 8.10216  | SDF2_ENSG00000132581;SUPT6H_ENSG00000109111                                |
| 17 | 27038054 | 27038298 | KD2-H4K8ac_peak_12217 | 13.73635 | PROCA1_ENSG00000167525                                                     |
| 17 | 27038618 | 27039032 | KD2-H4K8ac_peak_12218 | 8.4716   | PROCA1_ENSG00000167525                                                     |
| 17 | 27046180 | 27046533 | KD2-H4K8ac_peak_12219 | 6.78668  | RAB34_ENSG00000109113;RPL23A_ENSG00000198242                               |
| 17 | 27047012 | 27047266 | KD2-H4K8ac_peak_12220 | 12.88108 | RPL23A_ENSG00000198242;SNORD42B_ENSG00000238423                            |
| 17 | 27052807 | 27053171 | KD2-H4K8ac_peak_12221 | 6.66692  | NEK8_ENSG00000160602                                                       |
| 17 | 27053444 | 27053679 | KD2-H4K8ac_peak_12222 | 6.66692  | NEK8_ENSG00000160602;AC010761.14_ENSG00000267729                           |
| 17 | 27054440 | 27055596 | KD2-H4K8ac_peak_12223 | 6.56211  | TLCD1_ENSG00000160606;AC010761.14_ENSG00000267729                          |
| 17 | 27071154 | 27071674 | KD2-H4K8ac_peak_12224 | 8.26945  | TRAF4_ENSG00000076604                                                      |
| 17 | 27139170 | 27139393 | KD2-H4K8ac_peak_12225 | 13.70753 |                                                                            |
| 17 | 27169325 | 27170077 | KD2-H4K8ac_peak_12226 | 7.47462  |                                                                            |
| 17 | 27181120 | 27182364 | KD2-H4K8ac_peak_12227 | 14.98936 | FAM222B_ENSG00000173065;ERAL1_ENSG00000132591                              |
| 17 | 27224093 | 27224997 | KD2-H4K8ac_peak_12228 | 15.20126 | FLOT2_ENSG00000132589;RP11-20B24.4_ENSG00000266642                         |
| 17 | 27229380 | 27229906 | KD2-H4K8ac_peak_12229 | 10.19949 | DHRS13_ENSG00000167536                                                     |
| 17 | 27275898 | 27276101 | KD2-H4K8ac_peak_12230 | 6.83936  |                                                                            |
| 17 | 27276420 | 27277043 | KD2-H4K8ac_peak_12231 | 4.30033  | PIPOX_ENSG00000179761                                                      |
| 17 | 27277539 | 27278297 | KD2-H4K8ac_peak_12232 | 9.06432  | PIPOX_ENSG00000179761;PHF12_ENSG00000109118                                |
| 17 | 27279008 | 27279292 | KD2-H4K8ac_peak_12233 | 5.9696   | PHF12_ENSG00000109118                                                      |
| 17 | 27370044 | 27370263 | KD2-H4K8ac_peak_12234 | 4.8485   |                                                                            |

|    |          |          |                       |          |                                                                                                    |
|----|----------|----------|-----------------------|----------|----------------------------------------------------------------------------------------------------|
| 17 | 27375907 | 27376437 | KD2-H4K8ac_peak_12235 | 7.13615  |                                                                                                    |
| 17 | 27429706 | 27430855 | KD2-H4K8ac_peak_12236 | 11.9948  |                                                                                                    |
| 17 | 27503627 | 27503874 | KD2-H4K8ac_peak_12237 | 11.86082 |                                                                                                    |
| 17 | 27506593 | 27507157 | KD2-H4K8ac_peak_12238 | 7.47462  | MYO18A_ENSG00000196535                                                                             |
| 17 | 27507541 | 27507899 | KD2-H4K8ac_peak_12239 | 8.30974  | MYO18A_ENSG00000196535                                                                             |
| 17 | 27619869 | 27620548 | KD2-H4K8ac_peak_12240 | 9.96798  | NUFIP2_ENSG00000108256                                                                             |
| 17 | 27621378 | 27621757 | KD2-H4K8ac_peak_12241 | 4.86324  | NUFIP2_ENSG00000108256                                                                             |
| 17 | 27717025 | 27718044 | KD2-H4K8ac_peak_12242 | 22.21705 | MIR4523_ENSG00000264808;TAOK1_ENSG00000160551;MIR4523_ENSG00000263719                              |
| 17 | 27893832 | 27894025 | KD2-H4K8ac_peak_12243 | 6.47962  | ABHD15_ENSG00000168792;TP53I13_ENSG00000167543                                                     |
| 17 | 27895798 | 27896203 | KD2-H4K8ac_peak_12244 | 9.73431  | RP11-68I3.4_ENSG00000264290                                                                        |
| 17 | 27916806 | 27917046 | KD2-H4K8ac_peak_12245 | 8.55271  | ANKRD13B_ENSG00000198720                                                                           |
| 17 | 27917319 | 27917659 | KD2-H4K8ac_peak_12246 | 5.71781  | ANKRD13B_ENSG00000198720                                                                           |
| 17 | 27917891 | 27918703 | KD2-H4K8ac_peak_12247 | 8.53092  | RP11-68I3.7_ENSG00000264647                                                                        |
| 17 | 27918926 | 27919169 | KD2-H4K8ac_peak_12248 | 5.72327  | RP11-68I3.7_ENSG00000264647                                                                        |
| 17 | 27919435 | 27920360 | KD2-H4K8ac_peak_12249 | 12.47554 | GIT1_ENSG00000108262;RP11-68I3.7_ENSG00000264647                                                   |
| 17 | 27920628 | 27921162 | KD2-H4K8ac_peak_12250 | 7.76329  | GIT1_ENSG00000108262                                                                               |
| 17 | 27923821 | 27924027 | KD2-H4K8ac_peak_12251 | 4.37815  |                                                                                                    |
| 17 | 27940563 | 27940771 | KD2-H4K8ac_peak_12252 | 3.72574  |                                                                                                    |
| 17 | 27950089 | 27950349 | KD2-H4K8ac_peak_12253 | 11.37483 | CORO6_ENSG00000167549;RP11-68I3.10_ENSG00000264007                                                 |
| 17 | 27971194 | 27971745 | KD2-H4K8ac_peak_12254 | 9.1707   |                                                                                                    |
| 17 | 28033915 | 28034201 | KD2-H4K8ac_peak_12255 | 6.36319  |                                                                                                    |
| 17 | 28038681 | 28039008 | KD2-H4K8ac_peak_12256 | 6.22239  |                                                                                                    |
| 17 | 28048366 | 28048623 | KD2-H4K8ac_peak_12257 | 4.01115  |                                                                                                    |
| 17 | 28048942 | 28049252 | KD2-H4K8ac_peak_12258 | 9.84972  |                                                                                                    |
| 17 | 28051245 | 28051450 | KD2-H4K8ac_peak_12259 | 8.59579  |                                                                                                    |
| 17 | 28053119 | 28053562 | KD2-H4K8ac_peak_12260 | 5.54647  |                                                                                                    |
| 17 | 28072292 | 28072517 | KD2-H4K8ac_peak_12261 | 5.86783  |                                                                                                    |
| 17 | 28088017 | 28088684 | KD2-H4K8ac_peak_12262 | 8.55271  | RP11-82O19.1_ENSG00000263657                                                                       |
| 17 | 28106947 | 28107148 | KD2-H4K8ac_peak_12263 | 7.12754  |                                                                                                    |
| 17 | 28431830 | 28432428 | KD2-H4K8ac_peak_12264 | 6.16888  |                                                                                                    |
| 17 | 28443097 | 28443683 | KD2-H4K8ac_peak_12265 | 10.0692  | RP11-1148O4.2_ENSG00000265394;MIR3184_ENSG00000266919;MIR423_ENSG00000199071;NSRP1_ENSG00000126653 |
| 17 | 28444044 | 28444240 | KD2-H4K8ac_peak_12266 | 7.76329  | RP11-1148O4.2_ENSG00000265394;MIR3184_ENSG00000266919;MIR423_ENSG00000199071                       |
| 17 | 28618559 | 28619472 | KD2-H4K8ac_peak_12267 | 11.24702 | BLMH_ENSG00000108578                                                                               |
| 17 | 28705379 | 28705687 | KD2-H4K8ac_peak_12268 | 4.86324  | CPD_ENSG00000108582                                                                                |
| 17 | 28705983 | 28706300 | KD2-H4K8ac_peak_12269 | 11.43353 | CPD_ENSG00000108582                                                                                |
| 17 | 28803917 | 28804759 | KD2-H4K8ac_peak_12270 | 14.8083  | GOSR1_ENSG00000108587                                                                              |
| 17 | 28927477 | 28928393 | KD2-H4K8ac_peak_12271 | 11.00004 | SMURF2P1_ENSG00000248121                                                                           |
| 17 | 28994103 | 28994553 | KD2-H4K8ac_peak_12272 | 8.53092  |                                                                                                    |
| 17 | 28994780 | 28995104 | KD2-H4K8ac_peak_12273 | 22.21705 |                                                                                                    |
| 17 | 28996210 | 28996464 | KD2-H4K8ac_peak_12274 | 8.78496  |                                                                                                    |
| 17 | 29035096 | 29035443 | KD2-H4K8ac_peak_12275 | 6.67538  | SUZ12P_ENSG00000264538                                                                             |
| 17 | 29036092 | 29036491 | KD2-H4K8ac_peak_12276 | 8.33649  | SUZ12P_ENSG00000264538                                                                             |
| 17 | 29036692 | 29036956 | KD2-H4K8ac_peak_12277 | 7.76329  | SUZ12P_ENSG00000264538                                                                             |
| 17 | 29151967 | 29152976 | KD2-H4K8ac_peak_12278 | 8.26945  | CRLF3_ENSG00000176390                                                                              |
| 17 | 29232846 | 29233826 | KD2-H4K8ac_peak_12279 | 11.80283 | TEFM_ENSG00000172171;ADAP2_ENSG00000184060                                                         |
| 17 | 29421460 | 29421816 | KD2-H4K8ac_peak_12280 | 7.67504  | RP11-848P1.5_ENSG00000264107;MIR4733_ENSG00000265444;NF1_ENSG00000196712                           |

|    |          |          |                       |          |                                                                        |
|----|----------|----------|-----------------------|----------|------------------------------------------------------------------------|
| 17 | 29717817 | 29718539 | KD2-H4K8ac_peak_12281 | 8.10216  | RAB11FIP4_ENSG00000131242                                              |
| 17 | 29719202 | 29719514 | KD2-H4K8ac_peak_12282 | 8.30974  | RAB11FIP4_ENSG00000131242                                              |
| 17 | 29752722 | 29753151 | KD2-H4K8ac_peak_12283 | 10.96455 |                                                                        |
| 17 | 29876343 | 29876924 | KD2-H4K8ac_peak_12284 | 11.02863 |                                                                        |
| 17 | 29885458 | 29885740 | KD2-H4K8ac_peak_12285 | 5.77265  |                                                                        |
| 17 | 29886323 | 29886652 | KD2-H4K8ac_peak_12286 | 11.05467 | MIR193A_ENSG00000207614                                                |
| 17 | 29908441 | 29908735 | KD2-H4K8ac_peak_12287 | 7.07117  |                                                                        |
| 17 | 30185916 | 30186226 | KD2-H4K8ac_peak_12288 | 15.61313 | COPRS_ENSG00000172301                                                  |
| 17 | 30229099 | 30229429 | KD2-H4K8ac_peak_12289 | 12.06346 | UTP6_ENSG00000108651                                                   |
| 17 | 30263278 | 30263670 | KD2-H4K8ac_peak_12290 | 9.36516  | SUZ12_ENSG00000178691                                                  |
| 17 | 30264094 | 30264466 | KD2-H4K8ac_peak_12291 | 10.05606 | SUZ12_ENSG00000178691                                                  |
| 17 | 30334002 | 30334408 | KD2-H4K8ac_peak_12292 | 12.84642 | RP11-640N20.1_ENSG00000264300;LRRC37B_ENSG00000185158                  |
| 17 | 30396035 | 30396723 | KD2-H4K8ac_peak_12293 | 6.1846   |                                                                        |
| 17 | 30410515 | 30411222 | KD2-H4K8ac_peak_12294 | 21.10246 | RP11-640N20.6_ENSG00000264164                                          |
| 17 | 30432844 | 30433038 | KD2-H4K8ac_peak_12295 | 6.15357  |                                                                        |
| 17 | 30438399 | 30438659 | KD2-H4K8ac_peak_12296 | 9.1707   | CTD-2095E4.1_ENSG00000265574                                           |
| 17 | 30468969 | 30469360 | KD2-H4K8ac_peak_12297 | 13.09607 | AC090616.2_ENSG00000214708;RHOT1_ENSG00000126858                       |
| 17 | 30592372 | 30593048 | KD2-H4K8ac_peak_12298 | 3.90565  | RHBDL3_ENSG00000141314                                                 |
| 17 | 30602138 | 30602400 | KD2-H4K8ac_peak_12299 | 4.44527  |                                                                        |
| 17 | 30607876 | 30608623 | KD2-H4K8ac_peak_12300 | 6.20982  | RP11-443G13.2_ENSG00000263674                                          |
| 17 | 30668513 | 30669231 | KD2-H4K8ac_peak_12301 | 15.10495 |                                                                        |
| 17 | 30676284 | 30676496 | KD2-H4K8ac_peak_12302 | 5.61067  | C17orf75_ENSG00000108666;MIR632_ENSG00000207928;ZNF207_ENSG00000010244 |
| 17 | 30677323 | 30677595 | KD2-H4K8ac_peak_12303 | 6.99815  | C17orf75_ENSG00000108666;MIR632_ENSG00000207928;ZNF207_ENSG00000010244 |
| 17 | 30771565 | 30772055 | KD2-H4K8ac_peak_12304 | 8.04448  | PSMD11_ENSG00000108671                                                 |
| 17 | 30813140 | 30813374 | KD2-H4K8ac_peak_12305 | 8.4716   | CDK5R1_ENSG00000176749                                                 |
| 17 | 30814174 | 30814578 | KD2-H4K8ac_peak_12306 | 9.34195  | CDK5R1_ENSG00000176749                                                 |
| 17 | 30845916 | 30846742 | KD2-H4K8ac_peak_12307 | 15.47237 | RP11-466A19.6_ENSG00000263717;RP11-466A19.3_ENSG00000266599            |
| 17 | 31149441 | 31149934 | KD2-H4K8ac_peak_12308 | 14.43704 |                                                                        |
| 17 | 31203777 | 31204189 | KD2-H4K8ac_peak_12309 | 15.69572 | MYO1D_ENSG00000176658;AC084809.2_ENSG00000226377                       |
| 17 | 31254363 | 31255508 | KD2-H4K8ac_peak_12310 | 16.54484 | TMEM98_ENSG00000006042                                                 |
| 17 | 32940747 | 32941119 | KD2-H4K8ac_peak_12311 | 5.82799  |                                                                        |
| 17 | 32943553 | 32943910 | KD2-H4K8ac_peak_12312 | 12.3187  |                                                                        |
| 17 | 32947202 | 32947522 | KD2-H4K8ac_peak_12313 | 5.6755   |                                                                        |
| 17 | 33107647 | 33107845 | KD2-H4K8ac_peak_12314 | 4.67737  |                                                                        |
| 17 | 33108136 | 33108596 | KD2-H4K8ac_peak_12315 | 5.43522  |                                                                        |
| 17 | 33287760 | 33289125 | KD2-H4K8ac_peak_12316 | 15.81711 | ZNF830_ENSG00000198783                                                 |
| 17 | 33307581 | 33308142 | KD2-H4K8ac_peak_12317 | 8.80432  | LIG3_ENSG00000005156;CCT6B_ENSG00000132141                             |
| 17 | 33410950 | 33411250 | KD2-H4K8ac_peak_12318 | 6.99815  |                                                                        |
| 17 | 33415905 | 33416222 | KD2-H4K8ac_peak_12319 | 6.20982  | RFFL_ENSG00000092871                                                   |
| 17 | 33416516 | 33417055 | KD2-H4K8ac_peak_12320 | 6.65673  | RFFL_ENSG00000092871                                                   |
| 17 | 33446072 | 33446821 | KD2-H4K8ac_peak_12321 | 14.15075 |                                                                        |
| 17 | 33468770 | 33469290 | KD2-H4K8ac_peak_12322 | 14.00658 | NLE1_ENSG00000073536                                                   |
| 17 | 33469548 | 33469939 | KD2-H4K8ac_peak_12323 | 8.37231  | NLE1_ENSG00000073536                                                   |
| 17 | 33894119 | 33894516 | KD2-H4K8ac_peak_12324 | 16.94317 | RP11-1094M14.1_ENSG00000242660;RP11-1094M14.11_ENSG00000267321         |
| 17 | 33895163 | 33895399 | KD2-H4K8ac_peak_12325 | 10.17698 | RP11-1094M14.11_ENSG00000267321                                        |
| 17 | 33905127 | 33905581 | KD2-H4K8ac_peak_12326 | 15.06766 | PEX12_ENSG00000108733;AP2B1_ENSG00000006125                            |



|    |          |          |                       |          |                                                     |
|----|----------|----------|-----------------------|----------|-----------------------------------------------------|
| 17 | 33905775 | 33906044 | KD2-H4K8ac_peak_12327 | 11.03331 | PEX12_ENSG00000108733;AP2B1_ENSG00000006125         |
| 17 | 33913845 | 33914073 | KD2-H4K8ac_peak_12328 | 9.96798  |                                                     |
| 17 | 34091429 | 34091697 | KD2-H4K8ac_peak_12329 | 6.0605   |                                                     |
| 17 | 34101306 | 34102137 | KD2-H4K8ac_peak_12330 | 9.89383  |                                                     |
| 17 | 34128066 | 34128582 | KD2-H4K8ac_peak_12331 | 7.76329  |                                                     |
| 17 | 34128866 | 34129545 | KD2-H4K8ac_peak_12332 | 14.63262 |                                                     |
| 17 | 34135507 | 34136183 | KD2-H4K8ac_peak_12333 | 4.35346  | AC015849.12_ENSG00000267578;TAF15_ENSG00000172660   |
| 17 | 34136534 | 34136997 | KD2-H4K8ac_peak_12334 | 10.53377 | AC015849.12_ENSG00000267578;TAF15_ENSG00000172660   |
| 17 | 34838500 | 34838705 | KD2-H4K8ac_peak_12335 | 5.30799  |                                                     |
| 17 | 34839062 | 34839565 | KD2-H4K8ac_peak_12336 | 13.35993 |                                                     |
| 17 | 34841711 | 34842245 | KD2-H4K8ac_peak_12337 | 9.73431  | ZNHIT3_ENSG00000108278                              |
| 17 | 34890472 | 34890672 | KD2-H4K8ac_peak_12338 | 6.40297  | PIGW_ENSG00000184886                                |
| 17 | 34900376 | 34900619 | KD2-H4K8ac_peak_12339 | 8.85813  | GGNBP2_ENSG00000005955                              |
| 17 | 34947783 | 34948162 | KD2-H4K8ac_peak_12340 | 9.16531  | DHRS11_ENSG00000108272                              |
| 17 | 34948400 | 34948625 | KD2-H4K8ac_peak_12341 | 9.1707   | DHRS11_ENSG00000108272                              |
| 17 | 34957061 | 34957852 | KD2-H4K8ac_peak_12342 | 8.28234  | MRM1_ENSG00000129282                                |
| 17 | 34958083 | 34958550 | KD2-H4K8ac_peak_12343 | 10.17341 | MRM1_ENSG00000129282                                |
| 17 | 34982637 | 34982877 | KD2-H4K8ac_peak_12344 | 6.24747  |                                                     |
| 17 | 34998183 | 34998408 | KD2-H4K8ac_peak_12345 | 6.76298  |                                                     |
| 17 | 35036590 | 35037336 | KD2-H4K8ac_peak_12346 | 8.34752  |                                                     |
| 17 | 35076902 | 35077166 | KD2-H4K8ac_peak_12347 | 6.99815  |                                                     |
| 17 | 35078746 | 35079058 | KD2-H4K8ac_peak_12348 | 9.20193  | CTD-3194G12.2_ENSG00000267785                       |
| 17 | 35083573 | 35084303 | KD2-H4K8ac_peak_12349 | 15.81711 |                                                     |
| 17 | 35085138 | 35085843 | KD2-H4K8ac_peak_12350 | 20.47312 |                                                     |
| 17 | 35086104 | 35086339 | KD2-H4K8ac_peak_12351 | 8.59579  |                                                     |
| 17 | 35086658 | 35087030 | KD2-H4K8ac_peak_12352 | 7.1181   |                                                     |
| 17 | 35087913 | 35088185 | KD2-H4K8ac_peak_12353 | 5.57044  |                                                     |
| 17 | 35096011 | 35096256 | KD2-H4K8ac_peak_12354 | 3.75035  |                                                     |
| 17 | 35096486 | 35096687 | KD2-H4K8ac_peak_12355 | 4.01115  |                                                     |
| 17 | 35165177 | 35166067 | KD2-H4K8ac_peak_12356 | 14.4458  |                                                     |
| 17 | 35305745 | 35306022 | KD2-H4K8ac_peak_12357 | 13.31016 | AATF_ENSG00000108270                                |
| 17 | 35306306 | 35306784 | KD2-H4K8ac_peak_12358 | 5.13615  | AATF_ENSG00000108270                                |
| 17 | 35716237 | 35716666 | KD2-H4K8ac_peak_12359 | 7.44324  |                                                     |
| 17 | 35766430 | 35766885 | KD2-H4K8ac_peak_12360 | 16.32216 | ACACA_ENSG00000132142;TADA2A_ENSG00000108264        |
| 17 | 35849454 | 35849785 | KD2-H4K8ac_peak_12361 | 8.4716   | DUSP14_ENSG00000161326                              |
| 17 | 35969178 | 35969390 | KD2-H4K8ac_peak_12362 | 8.02571  | SYNRG_ENSG00000006114;RP11-697E22.1_ENSG00000267542 |
| 17 | 36003215 | 36003414 | KD2-H4K8ac_peak_12363 | 6.66692  | DDX52_ENSG00000141141;RP11-697E22.2_ENSG00000267668 |
| 17 | 36401535 | 36401772 | KD2-H4K8ac_peak_12364 | 5.59859  |                                                     |
| 17 | 36413578 | 36414396 | KD2-H4K8ac_peak_12365 | 11.03331 |                                                     |
| 17 | 36442620 | 36442934 | KD2-H4K8ac_peak_12366 | 9.11031  |                                                     |
| 17 | 36452293 | 36452666 | KD2-H4K8ac_peak_12367 | 7.40314  | MRPL45_ENSG00000174100                              |
| 17 | 36507300 | 36507618 | KD2-H4K8ac_peak_12368 | 6.65673  | SOCS7_ENSG00000174111                               |
| 17 | 36507952 | 36508301 | KD2-H4K8ac_peak_12369 | 5.9696   | SOCS7_ENSG00000174111                               |
| 17 | 36571192 | 36572311 | KD2-H4K8ac_peak_12370 | 13.80019 |                                                     |
| 17 | 36572532 | 36572843 | KD2-H4K8ac_peak_12371 | 5.82869  |                                                     |
| 17 | 36574864 | 36575361 | KD2-H4K8ac_peak_12372 | 10.96455 |                                                     |

|    |          |          |                       |          |                                                     |
|----|----------|----------|-----------------------|----------|-----------------------------------------------------|
| 17 | 36575972 | 36576780 | KD2-H4K8ac_peak_12373 | 6.69204  |                                                     |
| 17 | 36577302 | 36577530 | KD2-H4K8ac_peak_12374 | 8.02571  |                                                     |
| 17 | 36584263 | 36584495 | KD2-H4K8ac_peak_12375 | 8.37231  | ARHGAP23_ENSG00000225485                            |
| 17 | 36609929 | 36610191 | KD2-H4K8ac_peak_12376 | 5.37864  |                                                     |
| 17 | 36620866 | 36621491 | KD2-H4K8ac_peak_12377 | 10.08707 |                                                     |
| 17 | 36665980 | 36666794 | KD2-H4K8ac_peak_12378 | 11.50346 |                                                     |
| 17 | 36741498 | 36741812 | KD2-H4K8ac_peak_12379 | 5.30494  |                                                     |
| 17 | 36761213 | 36761436 | KD2-H4K8ac_peak_12380 | 4.42498  | SRCIN1_ENSG00000017373                              |
| 17 | 36761884 | 36763078 | KD2-H4K8ac_peak_12381 | 11.24702 | SRCIN1_ENSG00000017373                              |
| 17 | 36830017 | 36830228 | KD2-H4K8ac_peak_12382 | 5.49478  | C17orf96_ENSG00000179294                            |
| 17 | 36830648 | 36831217 | KD2-H4K8ac_peak_12383 | 7.28827  | C17orf96_ENSG00000179294                            |
| 17 | 36849854 | 36850105 | KD2-H4K8ac_peak_12384 | 11.66477 |                                                     |
| 17 | 36850460 | 36850701 | KD2-H4K8ac_peak_12385 | 14.48084 |                                                     |
| 17 | 36857865 | 36859247 | KD2-H4K8ac_peak_12386 | 17.17257 | MIR4734_ENSG00000265930;CTB-58E17.1_ENSG00000261005 |
| 17 | 36859923 | 36861280 | KD2-H4K8ac_peak_12387 | 15.13261 | MLLT6_ENSG00000108292                               |
| 17 | 36861519 | 36862353 | KD2-H4K8ac_peak_12388 | 12.00273 | CTB-58E17.3_ENSG00000266040;MLLT6_ENSG00000108292   |
| 17 | 36881137 | 36881329 | KD2-H4K8ac_peak_12389 | 5.84991  |                                                     |
| 17 | 36881664 | 36882134 | KD2-H4K8ac_peak_12390 | 7.146    |                                                     |
| 17 | 36886043 | 36886365 | KD2-H4K8ac_peak_12391 | 12.84642 | CISD3_ENSG00000230055                               |
| 17 | 36886634 | 36887018 | KD2-H4K8ac_peak_12392 | 10.08707 | CISD3_ENSG00000230055                               |
| 17 | 36898394 | 36898772 | KD2-H4K8ac_peak_12393 | 5.74496  |                                                     |
| 17 | 36899750 | 36900080 | KD2-H4K8ac_peak_12394 | 8.59579  |                                                     |
| 17 | 36903626 | 36904431 | KD2-H4K8ac_peak_12395 | 16.23676 |                                                     |
| 17 | 36904949 | 36905988 | KD2-H4K8ac_peak_12396 | 12.2118  | PCGF2_ENSG00000056661;CTB-58E17.5_ENSG00000227450   |
| 17 | 36906197 | 36906550 | KD2-H4K8ac_peak_12397 | 12.12738 | PCGF2_ENSG00000056661;CTB-58E17.5_ENSG00000227450   |
| 17 | 36906751 | 36906948 | KD2-H4K8ac_peak_12398 | 5.20998  | PCGF2_ENSG00000056661                               |
| 17 | 36955331 | 36955672 | KD2-H4K8ac_peak_12399 | 6.0605   | PIP4K2B_ENSG00000141720                             |
| 17 | 36955944 | 36956179 | KD2-H4K8ac_peak_12400 | 12.08081 | PIP4K2B_ENSG00000141720                             |
| 17 | 36981355 | 36982604 | KD2-H4K8ac_peak_12401 | 8.4716   | CWC25_ENSG00000108296;MIR4727_ENSG00000263791       |
| 17 | 37009702 | 37009928 | KD2-H4K8ac_peak_12402 | 8.79106  | RPL23_ENSG00000125691;SNORA21_ENSG00000199293       |
| 17 | 37010530 | 37010820 | KD2-H4K8ac_peak_12403 | 9.1707   | RPL23_ENSG00000125691;RPS20P35_ENSG00000244086      |
| 17 | 37011073 | 37011296 | KD2-H4K8ac_peak_12404 | 6.66692  | RPL23_ENSG00000125691;RPS20P35_ENSG00000244086      |
| 17 | 37025688 | 37026153 | KD2-H4K8ac_peak_12405 | 27.50934 | LASP1_ENSG00000002834                               |
| 17 | 37026987 | 37027960 | KD2-H4K8ac_peak_12406 | 8.52559  | LASP1_ENSG00000002834                               |
| 17 | 37213358 | 37213789 | KD2-H4K8ac_peak_12407 | 7.28628  | CTD-2206N4.4_ENSG00000263818                        |
| 17 | 37321034 | 37321804 | KD2-H4K8ac_peak_12408 | 5.9696   |                                                     |
| 17 | 37353570 | 37353882 | KD2-H4K8ac_peak_12409 | 14.275   | CACNB1_ENSG00000067191                              |
| 17 | 37354247 | 37354712 | KD2-H4K8ac_peak_12410 | 9.908    | CACNB1_ENSG00000067191                              |
| 17 | 37355557 | 37355990 | KD2-H4K8ac_peak_12411 | 8.86787  | RPL19_ENSG00000108298                               |
| 17 | 37356707 | 37356908 | KD2-H4K8ac_peak_12412 | 8.30974  | RPL19_ENSG00000108298                               |
| 17 | 37365948 | 37366491 | KD2-H4K8ac_peak_12413 | 6.36375  |                                                     |
| 17 | 37381813 | 37382174 | KD2-H4K8ac_peak_12414 | 7.18916  | STAC2_ENSG00000141750                               |
| 17 | 37382524 | 37382801 | KD2-H4K8ac_peak_12415 | 5.10505  | STAC2_ENSG00000141750                               |
| 17 | 37386977 | 37387692 | KD2-H4K8ac_peak_12416 | 8.10216  |                                                     |
| 17 | 37387976 | 37388353 | KD2-H4K8ac_peak_12417 | 6.65673  |                                                     |
| 17 | 37392716 | 37393154 | KD2-H4K8ac_peak_12418 | 8.94469  |                                                     |

|    |          |          |                       |          |                                                      |
|----|----------|----------|-----------------------|----------|------------------------------------------------------|
| 17 | 37607248 | 37607460 | KD2-H4K8ac_peak_12419 | 5.9696   | MED1_ENSG00000125686                                 |
| 17 | 37607831 | 37608145 | KD2-H4K8ac_peak_12420 | 16.03995 | MED1_ENSG00000125686                                 |
| 17 | 37617078 | 37617391 | KD2-H4K8ac_peak_12421 | 6.76298  | CDK12_ENSG00000167258                                |
| 17 | 37729903 | 37730447 | KD2-H4K8ac_peak_12422 | 5.88845  |                                                      |
| 17 | 37773620 | 37775333 | KD2-H4K8ac_peak_12423 | 18.5703  | AC087491.2_ENSG00000214546                           |
| 17 | 37792750 | 37793774 | KD2-H4K8ac_peak_12424 | 10.29842 | STARD3_ENSG00000131748                               |
| 17 | 37817149 | 37817356 | KD2-H4K8ac_peak_12425 | 7.98621  |                                                      |
| 17 | 37823646 | 37823990 | KD2-H4K8ac_peak_12426 | 7.79741  | PNMT_ENSG00000141744                                 |
| 17 | 37824220 | 37825086 | KD2-H4K8ac_peak_12427 | 15.58442 | PNMT_ENSG00000141744                                 |
| 17 | 37844683 | 37845082 | KD2-H4K8ac_peak_12428 | 7.76329  | ERBB2_ENSG00000141736                                |
| 17 | 37886482 | 37886981 | KD2-H4K8ac_peak_12429 | 13.83097 | MIEN1_ENSG00000141741                                |
| 17 | 37909841 | 37911370 | KD2-H4K8ac_peak_12430 | 18.37277 |                                                      |
| 17 | 38084189 | 38084548 | KD2-H4K8ac_peak_12431 | 9.34195  | ORMDL3_ENSG00000172057;RP11-387H17.4_ENSG00000264968 |
| 17 | 38108819 | 38109068 | KD2-H4K8ac_peak_12432 | 8.55271  |                                                      |
| 17 | 38109684 | 38110113 | KD2-H4K8ac_peak_12433 | 11.05467 |                                                      |
| 17 | 38115494 | 38115955 | KD2-H4K8ac_peak_12434 | 19.6416  |                                                      |
| 17 | 38136342 | 38136635 | KD2-H4K8ac_peak_12435 | 8.17902  | PSMD3_ENSG00000108344                                |
| 17 | 38182971 | 38183371 | KD2-H4K8ac_peak_12436 | 6.63018  | SNORD124_ENSG00000238793                             |
| 17 | 38210058 | 38210473 | KD2-H4K8ac_peak_12437 | 4.211    |                                                      |
| 17 | 38210785 | 38211151 | KD2-H4K8ac_peak_12438 | 11.05467 |                                                      |
| 17 | 38219207 | 38219646 | KD2-H4K8ac_peak_12439 | 4.06758  |                                                      |
| 17 | 38224612 | 38224988 | KD2-H4K8ac_peak_12440 | 6.55628  |                                                      |
| 17 | 38225528 | 38226135 | KD2-H4K8ac_peak_12441 | 10.65724 |                                                      |
| 17 | 38228021 | 38228488 | KD2-H4K8ac_peak_12442 | 15.14522 |                                                      |
| 17 | 38269704 | 38270169 | KD2-H4K8ac_peak_12443 | 9.43685  |                                                      |
| 17 | 38270386 | 38270668 | KD2-H4K8ac_peak_12444 | 6.69204  |                                                      |
| 17 | 38277692 | 38278078 | KD2-H4K8ac_peak_12445 | 4.211    | MSL1_ENSG00000188895                                 |
| 17 | 38278546 | 38279565 | KD2-H4K8ac_peak_12446 | 13.88933 | MSL1_ENSG00000188895                                 |
| 17 | 38295832 | 38296079 | KD2-H4K8ac_peak_12447 | 3.90565  | CASC3_ENSG00000108349                                |
| 17 | 38296790 | 38297380 | KD2-H4K8ac_peak_12448 | 21.11201 | CASC3_ENSG00000108349                                |
| 17 | 38333799 | 38334074 | KD2-H4K8ac_peak_12449 | 5.88845  | RAPGEFL1_ENSG00000108352                             |
| 17 | 38347485 | 38347691 | KD2-H4K8ac_peak_12450 | 8.30974  |                                                      |
| 17 | 38348109 | 38348452 | KD2-H4K8ac_peak_12451 | 9.5456   |                                                      |
| 17 | 38462802 | 38463259 | KD2-H4K8ac_peak_12452 | 7.993    |                                                      |
| 17 | 38463682 | 38463876 | KD2-H4K8ac_peak_12453 | 6.01098  |                                                      |
| 17 | 38464161 | 38464388 | KD2-H4K8ac_peak_12454 | 8.26129  |                                                      |
| 17 | 38465550 | 38466494 | KD2-H4K8ac_peak_12455 | 10.7186  | RARA_ENSG00000131759                                 |
| 17 | 38468362 | 38468744 | KD2-H4K8ac_peak_12456 | 7.98621  |                                                      |
| 17 | 38472278 | 38472480 | KD2-H4K8ac_peak_12457 | 4.86324  |                                                      |
| 17 | 38473188 | 38473617 | KD2-H4K8ac_peak_12458 | 5.38581  |                                                      |
| 17 | 38478754 | 38478950 | KD2-H4K8ac_peak_12459 | 4.40553  |                                                      |
| 17 | 38486695 | 38486950 | KD2-H4K8ac_peak_12460 | 5.33892  |                                                      |
| 17 | 38496980 | 38497466 | KD2-H4K8ac_peak_12461 | 4.211    |                                                      |
| 17 | 38497765 | 38498173 | KD2-H4K8ac_peak_12462 | 5.08628  |                                                      |
| 17 | 38498708 | 38499076 | KD2-H4K8ac_peak_12463 | 4.56666  | CTD-2267D19.2_ENSG00000265666                        |
| 17 | 38500348 | 38500554 | KD2-H4K8ac_peak_12464 | 5.08628  | CTD-2267D19.2_ENSG00000265666                        |

|    |          |          |                       |          |                         |
|----|----------|----------|-----------------------|----------|-------------------------|
| 17 | 38500773 | 38501133 | KD2-H4K8ac_peak_12465 | 5.59859  |                         |
| 17 | 38501621 | 38502235 | KD2-H4K8ac_peak_12466 | 5.75757  |                         |
| 17 | 38503721 | 38503931 | KD2-H4K8ac_peak_12467 | 6.52841  |                         |
| 17 | 38505856 | 38506359 | KD2-H4K8ac_peak_12468 | 7.95563  |                         |
| 17 | 38506644 | 38507161 | KD2-H4K8ac_peak_12469 | 8.55271  |                         |
| 17 | 38507598 | 38508604 | KD2-H4K8ac_peak_12470 | 20.5798  |                         |
| 17 | 38510409 | 38510647 | KD2-H4K8ac_peak_12471 | 8.30974  |                         |
| 17 | 38510909 | 38511278 | KD2-H4K8ac_peak_12472 | 4.86324  |                         |
| 17 | 38512472 | 38512772 | KD2-H4K8ac_peak_12473 | 7.76329  |                         |
| 17 | 38519296 | 38519699 | KD2-H4K8ac_peak_12474 | 7.95563  | GJD3_ENSG00000183153    |
| 17 | 38574535 | 38574974 | KD2-H4K8ac_peak_12475 | 6.99194  | TOP2A_ENSG00000131747   |
| 17 | 38576194 | 38576536 | KD2-H4K8ac_peak_12476 | 5.30494  |                         |
| 17 | 38589796 | 38590178 | KD2-H4K8ac_peak_12477 | 11.92978 |                         |
| 17 | 38599027 | 38600277 | KD2-H4K8ac_peak_12478 | 16.49944 | IGFBP4_ENSG00000141753  |
| 17 | 38616218 | 38616668 | KD2-H4K8ac_peak_12479 | 12.65397 |                         |
| 17 | 38617421 | 38617753 | KD2-H4K8ac_peak_12480 | 15.61313 |                         |
| 17 | 38618396 | 38619163 | KD2-H4K8ac_peak_12481 | 13.12288 |                         |
| 17 | 38619717 | 38619988 | KD2-H4K8ac_peak_12482 | 6.99815  |                         |
| 17 | 38627442 | 38627694 | KD2-H4K8ac_peak_12483 | 4.56666  |                         |
| 17 | 38632097 | 38632335 | KD2-H4K8ac_peak_12484 | 8.79106  |                         |
| 17 | 38646245 | 38647287 | KD2-H4K8ac_peak_12485 | 14.83804 |                         |
| 17 | 38647767 | 38648119 | KD2-H4K8ac_peak_12486 | 4.42765  |                         |
| 17 | 38692645 | 38693180 | KD2-H4K8ac_peak_12487 | 4.06758  |                         |
| 17 | 38694634 | 38695153 | KD2-H4K8ac_peak_12488 | 10.88013 |                         |
| 17 | 38696116 | 38696916 | KD2-H4K8ac_peak_12489 | 10.34742 |                         |
| 17 | 38697741 | 38698940 | KD2-H4K8ac_peak_12490 | 19.93398 |                         |
| 17 | 38699261 | 38701082 | KD2-H4K8ac_peak_12491 | 18.94636 |                         |
| 17 | 38701910 | 38702428 | KD2-H4K8ac_peak_12492 | 10.34742 |                         |
| 17 | 38703591 | 38704113 | KD2-H4K8ac_peak_12493 | 6.40297  |                         |
| 17 | 38704844 | 38705543 | KD2-H4K8ac_peak_12494 | 15.61313 |                         |
| 17 | 38705916 | 38706380 | KD2-H4K8ac_peak_12495 | 6.66692  |                         |
| 17 | 38712879 | 38713263 | KD2-H4K8ac_peak_12496 | 6.16883  |                         |
| 17 | 38713560 | 38714339 | KD2-H4K8ac_peak_12497 | 14.88905 |                         |
| 17 | 38715024 | 38715958 | KD2-H4K8ac_peak_12498 | 11.94415 |                         |
| 17 | 38716874 | 38717083 | KD2-H4K8ac_peak_12499 | 6.04107  |                         |
| 17 | 38803691 | 38804891 | KD2-H4K8ac_peak_12500 | 16.822   | SMARCE1_ENSG00000073584 |
| 17 | 38974897 | 38975230 | KD2-H4K8ac_peak_12501 | 7.12754  | TMEM99_ENSG00000167920  |
| 17 | 38975597 | 38975936 | KD2-H4K8ac_peak_12502 | 5.25071  | TMEM99_ENSG00000167920  |
| 17 | 39677458 | 39677871 | KD2-H4K8ac_peak_12503 | 6.93012  | KRT15_ENSG00000171346   |
| 17 | 39679873 | 39680462 | KD2-H4K8ac_peak_12504 | 8.79106  |                         |
| 17 | 39683489 | 39683937 | KD2-H4K8ac_peak_12505 | 7.47462  | KRT19_ENSG00000171345   |
| 17 | 39685604 | 39686498 | KD2-H4K8ac_peak_12506 | 15.25274 |                         |
| 17 | 39686907 | 39687558 | KD2-H4K8ac_peak_12507 | 14.48084 |                         |
| 17 | 39696458 | 39696974 | KD2-H4K8ac_peak_12508 | 9.9363   |                         |
| 17 | 39700688 | 39701291 | KD2-H4K8ac_peak_12509 | 12.65964 |                         |
| 17 | 39704224 | 39704491 | KD2-H4K8ac_peak_12510 | 6.66692  |                         |

|    |          |          |                       |          |                                                                                   |
|----|----------|----------|-----------------------|----------|-----------------------------------------------------------------------------------|
| 17 | 39704843 | 39705581 | KD2-H4K8ac_peak_12511 | 11.05467 |                                                                                   |
| 17 | 39790964 | 39791249 | KD2-H4K8ac_peak_12512 | 7.29632  |                                                                                   |
| 17 | 39822965 | 39823352 | KD2-H4K8ac_peak_12513 | 8.23274  |                                                                                   |
| 17 | 39845270 | 39845493 | KD2-H4K8ac_peak_12514 | 8.58725  | EIF1_ENSG00000173812                                                              |
| 17 | 39894495 | 39895229 | KD2-H4K8ac_peak_12515 | 14.23999 |                                                                                   |
| 17 | 39942602 | 39942876 | KD2-H4K8ac_peak_12516 | 5.00278  | JUP_ENSG00000173801                                                               |
| 17 | 39968065 | 39969785 | KD2-H4K8ac_peak_12517 | 12.57143 | LEPREL4_ENSG00000141696;FKBP10_ENSG00000141756                                    |
| 17 | 39992060 | 39992386 | KD2-H4K8ac_peak_12518 | 11.92978 | KLHL10_ENSG00000161594;NT5C3B_ENSG00000141698                                     |
| 17 | 40021304 | 40021573 | KD2-H4K8ac_peak_12519 | 8.85813  | KLHL11_ENSG00000178502                                                            |
| 17 | 40051604 | 40051889 | KD2-H4K8ac_peak_12520 | 8.78496  |                                                                                   |
| 17 | 40062689 | 40063064 | KD2-H4K8ac_peak_12521 | 9.16531  |                                                                                   |
| 17 | 40074483 | 40074931 | KD2-H4K8ac_peak_12522 | 9.57101  |                                                                                   |
| 17 | 40075597 | 40076133 | KD2-H4K8ac_peak_12523 | 20.42362 |                                                                                   |
| 17 | 40086398 | 40086670 | KD2-H4K8ac_peak_12524 | 8.4716   | ACLY_ENSG00000131473;TTC25_ENSG00000204815                                        |
| 17 | 40117958 | 40118349 | KD2-H4K8ac_peak_12525 | 7.40111  | CNP_ENSG00000173786                                                               |
| 17 | 40118826 | 40119382 | KD2-H4K8ac_peak_12526 | 6.0605   | CNP_ENSG00000173786                                                               |
| 17 | 40169051 | 40170269 | KD2-H4K8ac_peak_12527 | 20.71987 |                                                                                   |
| 17 | 40202023 | 40202817 | KD2-H4K8ac_peak_12528 | 16.07006 |                                                                                   |
| 17 | 40219879 | 40220211 | KD2-H4K8ac_peak_12529 | 6.5996   |                                                                                   |
| 17 | 40250081 | 40250415 | KD2-H4K8ac_peak_12530 | 6.66692  |                                                                                   |
| 17 | 40253917 | 40254181 | KD2-H4K8ac_peak_12531 | 4.67342  |                                                                                   |
| 17 | 40273006 | 40273231 | KD2-H4K8ac_peak_12532 | 8.79106  | KAT2A_ENSG00000108773                                                             |
| 17 | 40306740 | 40306976 | KD2-H4K8ac_peak_12533 | 12.79505 | CTD-2132N18.3_ENSG00000267261;RAB5C_ENSG00000108774;RP11-358B23.1_ENSG00000267658 |
| 17 | 40307311 | 40307707 | KD2-H4K8ac_peak_12534 | 10.53377 | CTD-2132N18.3_ENSG00000267261;RAB5C_ENSG00000108774;RP11-358B23.1_ENSG00000267658 |
| 17 | 40313244 | 40313694 | KD2-H4K8ac_peak_12535 | 10.0692  |                                                                                   |
| 17 | 40336318 | 40336599 | KD2-H4K8ac_peak_12536 | 6.25869  | HCRT_ENSG00000161610                                                              |
| 17 | 40346641 | 40346975 | KD2-H4K8ac_peak_12537 | 10.43145 | GHDC_ENSG00000167925                                                              |
| 17 | 40427853 | 40429295 | KD2-H4K8ac_peak_12538 | 16.95399 | STAT5B_ENSG00000173757                                                            |
| 17 | 40452361 | 40452570 | KD2-H4K8ac_peak_12539 | 7.67496  |                                                                                   |
| 17 | 40540920 | 40541125 | KD2-H4K8ac_peak_12540 | 8.55271  | STAT3_ENSG00000168610                                                             |
| 17 | 40610490 | 40610743 | KD2-H4K8ac_peak_12541 | 8.30974  | ATP6V0A1_ENSG00000033627                                                          |
| 17 | 40610998 | 40611252 | KD2-H4K8ac_peak_12542 | 12.25733 | ATP6V0A1_ENSG00000033627                                                          |
| 17 | 40684139 | 40684415 | KD2-H4K8ac_peak_12543 | 18.5703  |                                                                                   |
| 17 | 40687843 | 40688122 | KD2-H4K8ac_peak_12544 | 4.0528   | RP11-400F19.8_ENSG00000266929                                                     |
| 17 | 40688329 | 40688766 | KD2-H4K8ac_peak_12545 | 8.10216  | RP11-400F19.8_ENSG00000266929                                                     |
| 17 | 40706133 | 40707127 | KD2-H4K8ac_peak_12546 | 11.02863 | RP11-400F19.6_ENSG00000266962                                                     |
| 17 | 40713506 | 40713928 | KD2-H4K8ac_peak_12547 | 8.10216  | COASY_ENSG00000068120                                                             |
| 17 | 40714331 | 40714638 | KD2-H4K8ac_peak_12548 | 9.34195  | COASY_ENSG00000068120                                                             |
| 17 | 40718537 | 40718844 | KD2-H4K8ac_peak_12549 | 8.4716   | MLX_ENSG00000108788                                                               |
| 17 | 40719227 | 40719534 | KD2-H4K8ac_peak_12550 | 12.23    | MLX_ENSG00000108788                                                               |
| 17 | 40729467 | 40729686 | KD2-H4K8ac_peak_12551 | 8.16906  | PSMC3IP_ENSG00000131470                                                           |
| 17 | 40761764 | 40761965 | KD2-H4K8ac_peak_12552 | 8.26945  | TUBG1_ENSG00000131462;FAM134C_ENSG00000141699                                     |
| 17 | 40785323 | 40785629 | KD2-H4K8ac_peak_12553 | 6.31143  |                                                                                   |
| 17 | 40810894 | 40811146 | KD2-H4K8ac_peak_12554 | 4.56666  | TUBG2_ENSG00000037042                                                             |
| 17 | 40811384 | 40811840 | KD2-H4K8ac_peak_12555 | 8.10216  | TUBG2_ENSG00000037042                                                             |
| 17 | 40829487 | 40829911 | KD2-H4K8ac_peak_12556 | 11.6867  | PLEKHH3_ENSG00000068137                                                           |

|    |          |          |                       |          |                                                                                |
|----|----------|----------|-----------------------|----------|--------------------------------------------------------------------------------|
| 17 | 40830700 | 40832588 | KD2-H4K8ac_peak_12557 | 25.8903  | CTD-3193K9.4_ENSG00000267042                                                   |
| 17 | 40834792 | 40835238 | KD2-H4K8ac_peak_12558 | 8.3479   | CCR10_ENSG00000184451;CNTNAP1_ENSG00000108797                                  |
| 17 | 40896440 | 40896658 | KD2-H4K8ac_peak_12559 | 5.4779   | EZH1_ENSG00000108799                                                           |
| 17 | 40896870 | 40897369 | KD2-H4K8ac_peak_12560 | 5.75757  | EZH1_ENSG00000108799                                                           |
| 17 | 40912639 | 40913899 | KD2-H4K8ac_peak_12561 | 16.54484 | RAMP2-AS1_ENSG00000197291                                                      |
| 17 | 40915185 | 40915567 | KD2-H4K8ac_peak_12562 | 8.30974  |                                                                                |
| 17 | 40924576 | 40925021 | KD2-H4K8ac_peak_12563 | 7.98621  | VPS25_ENSG00000131475                                                          |
| 17 | 40925533 | 40925910 | KD2-H4K8ac_peak_12564 | 11.43863 | VPS25_ENSG00000131475                                                          |
| 17 | 40932163 | 40933157 | KD2-H4K8ac_peak_12565 | 8.83749  | WNK4_ENSG00000126562                                                           |
| 17 | 40950430 | 40950663 | KD2-H4K8ac_peak_12566 | 12.08081 | COA3_ENSG00000183978;CNTD1_ENSG00000176563                                     |
| 17 | 40951010 | 40951231 | KD2-H4K8ac_peak_12567 | 9.41619  | COA3_ENSG00000183978;CNTD1_ENSG00000176563                                     |
| 17 | 40975824 | 40976875 | KD2-H4K8ac_peak_12568 | 9.63487  | PSME3_ENSG00000131467                                                          |
| 17 | 40984220 | 40984532 | KD2-H4K8ac_peak_12569 | 6.66692  | BECN1_ENSG00000126581                                                          |
| 17 | 40984803 | 40985838 | KD2-H4K8ac_peak_12570 | 11.05467 | BECN1_ENSG00000126581                                                          |
| 17 | 41116042 | 41116452 | KD2-H4K8ac_peak_12571 | 8.00457  | AARSD1_ENSG00000266967                                                         |
| 17 | 41116676 | 41116962 | KD2-H4K8ac_peak_12572 | 6.00226  | AARSD1_ENSG00000266967                                                         |
| 17 | 41117279 | 41117639 | KD2-H4K8ac_peak_12573 | 5.57044  | AARSD1_ENSG00000266967                                                         |
| 17 | 41131376 | 41131569 | KD2-H4K8ac_peak_12574 | 4.01115  | PTGES3L-AARSD1_ENSG00000108825;PTGES3L_ENSG00000267060                         |
| 17 | 41150522 | 41150978 | KD2-H4K8ac_peak_12575 | 6.56211  | Y_RNA_ENSG00000200127;RPL27_ENSG00000131469                                    |
| 17 | 41173788 | 41174225 | KD2-H4K8ac_peak_12576 | 5.87879  |                                                                                |
| 17 | 41176853 | 41177050 | KD2-H4K8ac_peak_12577 | 6.25869  | VAT1_ENSG00000108828;RND2_ENSG00000108830                                      |
| 17 | 41322511 | 41323001 | KD2-H4K8ac_peak_12578 | 7.27716  | RP11-242D8.1_ENSG00000267002;RP11-242D8.3_ENSG00000267340;NBR1_ENSG00000188554 |
| 17 | 41392217 | 41393243 | KD2-H4K8ac_peak_12579 | 12.93209 |                                                                                |
| 17 | 41400880 | 41401117 | KD2-H4K8ac_peak_12580 | 11.29    |                                                                                |
| 17 | 41439348 | 41439948 | KD2-H4K8ac_peak_12581 | 17.76996 |                                                                                |
| 17 | 41445948 | 41447082 | KD2-H4K8ac_peak_12582 | 11.92978 |                                                                                |
| 17 | 41464827 | 41465182 | KD2-H4K8ac_peak_12583 | 7.69294  |                                                                                |
| 17 | 41471629 | 41471970 | KD2-H4K8ac_peak_12584 | 5.95537  |                                                                                |
| 17 | 41475897 | 41476132 | KD2-H4K8ac_peak_12585 | 7.74292  | ARL4D_ENSG00000175906                                                          |
| 17 | 41496558 | 41497052 | KD2-H4K8ac_peak_12586 | 7.47462  |                                                                                |
| 17 | 41560513 | 41561011 | KD2-H4K8ac_peak_12587 | 9.19305  | DHX8_ENSG00000067596                                                           |
| 17 | 41622110 | 41622463 | KD2-H4K8ac_peak_12588 | 8.41122  | RP11-392O1.4_ENSG00000267747                                                   |
| 17 | 41622672 | 41623705 | KD2-H4K8ac_peak_12589 | 17.63891 | RP11-392O1.4_ENSG00000267747                                                   |
| 17 | 41669576 | 41670090 | KD2-H4K8ac_peak_12590 | 5.32397  |                                                                                |
| 17 | 41723106 | 41723853 | KD2-H4K8ac_peak_12591 | 9.15069  |                                                                                |
| 17 | 41754902 | 41755341 | KD2-H4K8ac_peak_12592 | 13.56049 |                                                                                |
| 17 | 41791217 | 41791604 | KD2-H4K8ac_peak_12593 | 5.30799  |                                                                                |
| 17 | 41797632 | 41798278 | KD2-H4K8ac_peak_12594 | 23.72814 | RP11-209M4.1_ENSG00000267253                                                   |
| 17 | 41855784 | 41856265 | KD2-H4K8ac_peak_12595 | 16.8435  | DUSP3_ENSG00000108861                                                          |
| 17 | 41909823 | 41911127 | KD2-H4K8ac_peak_12596 | 11.05467 | MPP3_ENSG00000161647                                                           |
| 17 | 41978168 | 41978574 | KD2-H4K8ac_peak_12597 | 4.44527  |                                                                                |
| 17 | 41985609 | 41985863 | KD2-H4K8ac_peak_12598 | 5.51783  |                                                                                |
| 17 | 42015183 | 42015485 | KD2-H4K8ac_peak_12599 | 8.10216  | RP11-527L4.2_ENSG00000261514                                                   |
| 17 | 42016047 | 42016286 | KD2-H4K8ac_peak_12600 | 6.66692  | RP11-527L4.2_ENSG00000261514                                                   |
| 17 | 42051500 | 42051953 | KD2-H4K8ac_peak_12601 | 4.86324  |                                                                                |
| 17 | 42055017 | 42055248 | KD2-H4K8ac_peak_12602 | 8.05667  |                                                                                |

|    |          |          |                       |          |                                                                        |
|----|----------|----------|-----------------------|----------|------------------------------------------------------------------------|
| 17 | 42061086 | 42061713 | KD2-H4K8ac_peak_12603 | 13.13965 |                                                                        |
| 17 | 42091651 | 42092301 | KD2-H4K8ac_peak_12604 | 17.55491 |                                                                        |
| 17 | 42100958 | 42101562 | KD2-H4K8ac_peak_12605 | 13.70753 | TMEM101_ENSG00000091947                                                |
| 17 | 42143701 | 42143945 | KD2-H4K8ac_peak_12606 | 13.80019 |                                                                        |
| 17 | 42144419 | 42144625 | KD2-H4K8ac_peak_12607 | 11.79585 | LSM12_ENSG00000161654                                                  |
| 17 | 42148360 | 42148605 | KD2-H4K8ac_peak_12608 | 7.36799  | G6PC3_ENSG00000141349                                                  |
| 17 | 42173158 | 42173583 | KD2-H4K8ac_peak_12609 | 9.36516  |                                                                        |
| 17 | 42188274 | 42188534 | KD2-H4K8ac_peak_12610 | 9.34989  |                                                                        |
| 17 | 42200641 | 42200926 | KD2-H4K8ac_peak_12611 | 7.40314  | HDAC5_ENSG00000108840                                                  |
| 17 | 42218602 | 42219059 | KD2-H4K8ac_peak_12612 | 9.1707   | C17orf53_ENSG00000125319                                               |
| 17 | 42219378 | 42219607 | KD2-H4K8ac_peak_12613 | 10.0692  | C17orf53_ENSG00000125319                                               |
| 17 | 42264375 | 42264862 | KD2-H4K8ac_peak_12614 | 9.1707   | ASB16-AS1_ENSG00000267080;TMUB2_ENSG00000168591                        |
| 17 | 42276343 | 42277352 | KD2-H4K8ac_peak_12615 | 10.96455 | ATXN7L3_ENSG00000087152;CTB-175E5.7_ENSG00000267394                    |
| 17 | 42277856 | 42278145 | KD2-H4K8ac_peak_12616 | 7.76104  | ATXN7L3_ENSG00000087152                                                |
| 17 | 42295533 | 42295780 | KD2-H4K8ac_peak_12617 | 7.36799  |                                                                        |
| 17 | 42296117 | 42296958 | KD2-H4K8ac_peak_12618 | 6.50449  |                                                                        |
| 17 | 42297263 | 42298221 | KD2-H4K8ac_peak_12619 | 10.43145 | UBTF_ENSG00000108312;RP5-882C2.2_ENSG00000260793                       |
| 17 | 42298437 | 42298888 | KD2-H4K8ac_peak_12620 | 6.66692  | UBTF_ENSG00000108312;RP5-882C2.2_ENSG00000260793                       |
| 17 | 42324182 | 42324403 | KD2-H4K8ac_peak_12621 | 7.27716  |                                                                        |
| 17 | 42324644 | 42325137 | KD2-H4K8ac_peak_12622 | 11.97761 |                                                                        |
| 17 | 42386231 | 42386471 | KD2-H4K8ac_peak_12623 | 6.30229  | RUNDC3A_ENSG00000108309                                                |
| 17 | 42421499 | 42422268 | KD2-H4K8ac_peak_12624 | 9.51625  | GRN_ENSG00000030582                                                    |
| 17 | 42462338 | 42462743 | KD2-H4K8ac_peak_12625 | 10.98959 |                                                                        |
| 17 | 42462947 | 42463284 | KD2-H4K8ac_peak_12626 | 22.76112 |                                                                        |
| 17 | 42580343 | 42581751 | KD2-H4K8ac_peak_12627 | 9.36516  | GPATCH8_ENSG00000186566                                                |
| 17 | 42610955 | 42611537 | KD2-H4K8ac_peak_12628 | 11.70505 |                                                                        |
| 17 | 42633845 | 42634385 | KD2-H4K8ac_peak_12629 | 6.83936  | FZD2_ENSG00000180340                                                   |
| 17 | 42645583 | 42645888 | KD2-H4K8ac_peak_12630 | 8.21852  |                                                                        |
| 17 | 42676912 | 42677270 | KD2-H4K8ac_peak_12631 | 5.32137  |                                                                        |
| 17 | 42684843 | 42687080 | KD2-H4K8ac_peak_12632 | 18.54875 |                                                                        |
| 17 | 42733817 | 42734025 | KD2-H4K8ac_peak_12633 | 6.25869  | C17orf104_ENSG00000180336                                              |
| 17 | 42734311 | 42734574 | KD2-H4K8ac_peak_12634 | 6.66692  | C17orf104_ENSG00000180336                                              |
| 17 | 42766701 | 42767011 | KD2-H4K8ac_peak_12635 | 7.07117  | CCDC43_ENSG00000180329                                                 |
| 17 | 42767319 | 42767541 | KD2-H4K8ac_peak_12636 | 5.34636  | CCDC43_ENSG00000180329                                                 |
| 17 | 42784996 | 42785801 | KD2-H4K8ac_peak_12637 | 5.82799  | DBF4B_ENSG00000161692                                                  |
| 17 | 42786231 | 42786534 | KD2-H4K8ac_peak_12638 | 5.13615  | DBF4B_ENSG00000161692                                                  |
| 17 | 42835910 | 42836410 | KD2-H4K8ac_peak_12639 | 14.8083  | ADAM11_ENSG00000073670                                                 |
| 17 | 42836636 | 42837363 | KD2-H4K8ac_peak_12640 | 6.99815  | ADAM11_ENSG00000073670                                                 |
| 17 | 42856712 | 42857196 | KD2-H4K8ac_peak_12641 | 14.68449 |                                                                        |
| 17 | 42907442 | 42908119 | KD2-H4K8ac_peak_12642 | 11.92978 | GJC1_ENSG00000182963                                                   |
| 17 | 42976756 | 42977046 | KD2-H4K8ac_peak_12643 | 9.048    | EFTUD2_ENSG00000108883;CCDC103_ENSG00000167131;FAM187A_ENSG00000214447 |
| 17 | 42998531 | 42998889 | KD2-H4K8ac_peak_12644 | 6.83936  |                                                                        |
| 17 | 43000729 | 43001349 | KD2-H4K8ac_peak_12645 | 7.07512  |                                                                        |
| 17 | 43034288 | 43034530 | KD2-H4K8ac_peak_12646 | 5.14125  |                                                                        |
| 17 | 43045139 | 43045509 | KD2-H4K8ac_peak_12647 | 7.69287  | C1QL1_ENSG00000131094                                                  |
| 17 | 43047572 | 43047975 | KD2-H4K8ac_peak_12648 | 16.15695 |                                                                        |

|    |          |          |                       |          |                                                     |
|----|----------|----------|-----------------------|----------|-----------------------------------------------------|
| 17 | 43095688 | 43095908 | KD2-H4K8ac_peak_12649 | 8.30974  |                                                     |
| 17 | 43096105 | 43097276 | KD2-H4K8ac_peak_12650 | 14.4458  |                                                     |
| 17 | 43099169 | 43099411 | KD2-H4K8ac_peak_12651 | 8.16906  |                                                     |
| 17 | 43099642 | 43099966 | KD2-H4K8ac_peak_12652 | 9.08816  |                                                     |
| 17 | 43107614 | 43107978 | KD2-H4K8ac_peak_12653 | 6.47962  |                                                     |
| 17 | 43108210 | 43108794 | KD2-H4K8ac_peak_12654 | 8.30974  |                                                     |
| 17 | 43109573 | 43110418 | KD2-H4K8ac_peak_12655 | 7.76104  |                                                     |
| 17 | 43128164 | 43128850 | KD2-H4K8ac_peak_12656 | 10.05606 | NMT1_ENSG00000136448                                |
| 17 | 43129471 | 43129785 | KD2-H4K8ac_peak_12657 | 14.98671 | NMT1_ENSG00000136448                                |
| 17 | 43130095 | 43130351 | KD2-H4K8ac_peak_12658 | 7.26089  |                                                     |
| 17 | 43138108 | 43138368 | KD2-H4K8ac_peak_12659 | 12.46522 | DCAKD_ENSG00000172992                               |
| 17 | 43205811 | 43206026 | KD2-H4K8ac_peak_12660 | 4.42765  |                                                     |
| 17 | 43213051 | 43213758 | KD2-H4K8ac_peak_12661 | 8.4716   |                                                     |
| 17 | 43224338 | 43225413 | KD2-H4K8ac_peak_12662 | 14.70748 | HEXIM1_ENSG00000186834                              |
| 17 | 43238453 | 43238887 | KD2-H4K8ac_peak_12663 | 13.95627 | AC002117.1_ENSG00000224505;HEXIM2_ENSG00000168517   |
| 17 | 43239366 | 43240210 | KD2-H4K8ac_peak_12664 | 7.47462  | AC002117.1_ENSG00000224505                          |
| 17 | 43248605 | 43249494 | KD2-H4K8ac_peak_12665 | 9.89383  | RP13-890H12.2_ENSG00000267288                       |
| 17 | 43250194 | 43250723 | KD2-H4K8ac_peak_12666 | 12.08081 |                                                     |
| 17 | 43275049 | 43275683 | KD2-H4K8ac_peak_12667 | 12.08081 |                                                     |
| 17 | 43298763 | 43299696 | KD2-H4K8ac_peak_12668 | 6.40297  | CTD-2020K17.1_ENSG00000267121;FMNL1_ENSG00000184922 |
| 17 | 43318863 | 43319216 | KD2-H4K8ac_peak_12669 | 5.01002  | CTD-2020K17.3_ENSG00000233175                       |
| 17 | 43324055 | 43324409 | KD2-H4K8ac_peak_12670 | 5.20908  | MAP3K14-AS1_ENSG00000267278                         |
| 17 | 43365544 | 43366288 | KD2-H4K8ac_peak_12671 | 7.49599  |                                                     |
| 17 | 43367834 | 43368052 | KD2-H4K8ac_peak_12672 | 4.44527  |                                                     |
| 17 | 43370168 | 43370433 | KD2-H4K8ac_peak_12673 | 4.56666  |                                                     |
| 17 | 43370895 | 43371414 | KD2-H4K8ac_peak_12674 | 8.5092   |                                                     |
| 17 | 43376984 | 43377212 | KD2-H4K8ac_peak_12675 | 3.75035  |                                                     |
| 17 | 43419061 | 43419638 | KD2-H4K8ac_peak_12676 | 7.36799  |                                                     |
| 17 | 43449082 | 43449466 | KD2-H4K8ac_peak_12677 | 9.63487  | CTB-39G8.2_ENSG00000267446                          |
| 17 | 43472315 | 43472854 | KD2-H4K8ac_peak_12678 | 7.45501  |                                                     |
| 17 | 43502840 | 43503213 | KD2-H4K8ac_peak_12679 | 8.55271  |                                                     |
| 17 | 43508961 | 43509258 | KD2-H4K8ac_peak_12680 | 9.44423  |                                                     |
| 17 | 43514083 | 43514795 | KD2-H4K8ac_peak_12681 | 23.33626 |                                                     |
| 17 | 43567688 | 43568014 | KD2-H4K8ac_peak_12682 | 6.40297  | PLEKHM1_ENSG00000225190                             |
| 17 | 43568503 | 43568895 | KD2-H4K8ac_peak_12683 | 5.92591  | PLEKHM1_ENSG00000225190                             |
| 17 | 43661698 | 43663316 | KD2-H4K8ac_peak_12684 | 26.39451 | DND1P1_ENSG00000264070                              |
| 17 | 43697756 | 43698247 | KD2-H4K8ac_peak_12685 | 7.36799  | CRHR1-IT1_ENSG00000204650                           |
| 17 | 43816946 | 43817272 | KD2-H4K8ac_peak_12686 | 5.13893  |                                                     |
| 17 | 43903903 | 43904197 | KD2-H4K8ac_peak_12687 | 5.48272  |                                                     |
| 17 | 43926160 | 43926979 | KD2-H4K8ac_peak_12688 | 5.38581  |                                                     |
| 17 | 43970584 | 43971093 | KD2-H4K8ac_peak_12689 | 8.49564  | MAPT_ENSG00000186868                                |
| 17 | 43971288 | 43971705 | KD2-H4K8ac_peak_12690 | 28.09984 | MAPT_ENSG00000186868                                |
| 17 | 43971944 | 43972378 | KD2-H4K8ac_peak_12691 | 17.75427 | MAPT-AS1_ENSG00000264589;MAPT_ENSG00000186868       |
| 17 | 44269922 | 44270734 | KD2-H4K8ac_peak_12692 | 17.90608 | KANSL1-AS1_ENSG00000214401                          |
| 17 | 44270981 | 44271387 | KD2-H4K8ac_peak_12693 | 9.67696  | KANSL1-AS1_ENSG00000214401                          |
| 17 | 44302273 | 44302683 | KD2-H4K8ac_peak_12694 | 11.50346 | KANSL1_ENSG00000120071                              |



|    |          |          |                       |          |                                                                                |
|----|----------|----------|-----------------------|----------|--------------------------------------------------------------------------------|
| 17 | 44336830 | 44337022 | KD2-H4K8ac_peak_12695 | 4.77079  | RP11-259G18.3_ENSG00000262539                                                  |
| 17 | 44343764 | 44344141 | KD2-H4K8ac_peak_12696 | 11.89502 | RP11-259G18.1_ENSG00000261575                                                  |
| 17 | 44344414 | 44344850 | KD2-H4K8ac_peak_12697 | 12.84642 | RP11-259G18.1_ENSG00000261575                                                  |
| 17 | 44847700 | 44849088 | KD2-H4K8ac_peak_12698 | 23.04547 |                                                                                |
| 17 | 44849318 | 44849911 | KD2-H4K8ac_peak_12699 | 19.25648 |                                                                                |
| 17 | 44886688 | 44887189 | KD2-H4K8ac_peak_12700 | 14.27217 |                                                                                |
| 17 | 44913164 | 44913366 | KD2-H4K8ac_peak_12701 | 5.38581  |                                                                                |
| 17 | 44999717 | 45000059 | KD2-H4K8ac_peak_12702 | 4.57782  | RP11-63A1.1_ENSG00000261886;GOSR2_ENSG00000108433;RP11-156P1.2_ENSG00000262633 |
| 17 | 45000291 | 45000887 | KD2-H4K8ac_peak_12703 | 11.22667 | RP11-63A1.1_ENSG00000261886;GOSR2_ENSG00000108433;RP11-156P1.2_ENSG00000262633 |
| 17 | 45144511 | 45144854 | KD2-H4K8ac_peak_12704 | 16.54484 |                                                                                |
| 17 | 45177178 | 45177543 | KD2-H4K8ac_peak_12705 | 9.57101  | RP11-156P1.3_ENSG00000262879                                                   |
| 17 | 45178275 | 45178516 | KD2-H4K8ac_peak_12706 | 7.45629  | RP11-156P1.3_ENSG00000262879                                                   |
| 17 | 45220231 | 45220441 | KD2-H4K8ac_peak_12707 | 4.06758  |                                                                                |
| 17 | 45331393 | 45331893 | KD2-H4K8ac_peak_12708 | 8.26945  | ITGB3_ENSG00000259207;ITGB3_ENSG00000259753                                    |
| 17 | 45353431 | 45353800 | KD2-H4K8ac_peak_12709 | 5.59859  |                                                                                |
| 17 | 45400758 | 45401585 | KD2-H4K8ac_peak_12710 | 9.26408  | RP11-290H9.4_ENSG00000263293;EFCAB13_ENSG00000178852                           |
| 17 | 45607946 | 45608300 | KD2-H4K8ac_peak_12711 | 9.63487  |                                                                                |
| 17 | 45608796 | 45609353 | KD2-H4K8ac_peak_12712 | 16.58076 |                                                                                |
| 17 | 45726141 | 45726694 | KD2-H4K8ac_peak_12713 | 13.20052 | RP11-580I16.2_ENSG00000263766;KPNB1_ENSG00000108424                            |
| 17 | 45727625 | 45727897 | KD2-H4K8ac_peak_12714 | 19.30951 | RP11-580I16.2_ENSG00000263766;KPNB1_ENSG00000108424                            |
| 17 | 45728197 | 45728638 | KD2-H4K8ac_peak_12715 | 6.57664  |                                                                                |
| 17 | 45765166 | 45765377 | KD2-H4K8ac_peak_12716 | 5.405    |                                                                                |
| 17 | 45771641 | 45772063 | KD2-H4K8ac_peak_12717 | 11.0821  | TBKBPI_ENSG00000198933                                                         |
| 17 | 45772330 | 45772615 | KD2-H4K8ac_peak_12718 | 8.85813  | TBKBPI_ENSG00000198933                                                         |
| 17 | 45804327 | 45804555 | KD2-H4K8ac_peak_12719 | 6.40297  |                                                                                |
| 17 | 45866976 | 45867491 | KD2-H4K8ac_peak_12720 | 6.91449  |                                                                                |
| 17 | 45898271 | 45899016 | KD2-H4K8ac_peak_12721 | 6.66359  | OSBPL7_ENSG00000006025                                                         |
| 17 | 45899592 | 45900177 | KD2-H4K8ac_peak_12722 | 10.44656 | OSBPL7_ENSG00000006025                                                         |
| 17 | 45908623 | 45908853 | KD2-H4K8ac_peak_12723 | 9.57101  | LRRC46_ENSG00000141294;MRPL10_ENSG00000159111                                  |
| 17 | 45917982 | 45919318 | KD2-H4K8ac_peak_12724 | 16.29636 | SCRN2_ENSG00000141295                                                          |
| 17 | 45972602 | 45973105 | KD2-H4K8ac_peak_12725 | 7.44247  | RP11-6N17.4_ENSG00000264920;SP2_ENSG00000167182                                |
| 17 | 45973615 | 45974322 | KD2-H4K8ac_peak_12726 | 13.23341 | RP11-6N17.4_ENSG00000264920;SP2_ENSG00000167182                                |
| 17 | 46018354 | 46018714 | KD2-H4K8ac_peak_12727 | 11.61757 | AC003665.1_ENSG00000234494;PNPO_ENSG00000108439                                |
| 17 | 46018971 | 46019846 | KD2-H4K8ac_peak_12728 | 15.57998 | AC003665.1_ENSG00000234494;PNPO_ENSG00000108439                                |
| 17 | 46026951 | 46027524 | KD2-H4K8ac_peak_12729 | 7.76329  |                                                                                |
| 17 | 46047560 | 46047933 | KD2-H4K8ac_peak_12730 | 6.45083  |                                                                                |
| 17 | 46048504 | 46049302 | KD2-H4K8ac_peak_12731 | 14.99434 |                                                                                |
| 17 | 46059286 | 46059671 | KD2-H4K8ac_peak_12732 | 11.82518 |                                                                                |
| 17 | 46060093 | 46060884 | KD2-H4K8ac_peak_12733 | 9.63487  |                                                                                |
| 17 | 46064363 | 46064892 | KD2-H4K8ac_peak_12734 | 14.45144 |                                                                                |
| 17 | 46065216 | 46065648 | KD2-H4K8ac_peak_12735 | 12.76142 |                                                                                |
| 17 | 46068250 | 46069125 | KD2-H4K8ac_peak_12736 | 25.00847 |                                                                                |
| 17 | 46070687 | 46070904 | KD2-H4K8ac_peak_12737 | 9.20193  |                                                                                |
| 17 | 46072111 | 46072486 | KD2-H4K8ac_peak_12738 | 8.58725  |                                                                                |
| 17 | 46072767 | 46073047 | KD2-H4K8ac_peak_12739 | 8.4716   | RP11-6N17.10_ENSG00000264701                                                   |
| 17 | 46073361 | 46073637 | KD2-H4K8ac_peak_12740 | 11.3474  | RP11-6N17.10_ENSG00000264701                                                   |

|    |          |          |                       |          |                                                       |
|----|----------|----------|-----------------------|----------|-------------------------------------------------------|
| 17 | 46075996 | 46076211 | KD2-H4K8ac_peak_12741 | 6.74189  |                                                       |
| 17 | 46077042 | 46077266 | KD2-H4K8ac_peak_12742 | 8.30671  |                                                       |
| 17 | 46079039 | 46080185 | KD2-H4K8ac_peak_12743 | 11.44756 |                                                       |
| 17 | 46080498 | 46081034 | KD2-H4K8ac_peak_12744 | 12.82393 |                                                       |
| 17 | 46081371 | 46082901 | KD2-H4K8ac_peak_12745 | 13.80019 |                                                       |
| 17 | 46088675 | 46089444 | KD2-H4K8ac_peak_12746 | 29.06047 |                                                       |
| 17 | 46089942 | 46090913 | KD2-H4K8ac_peak_12747 | 27.57364 |                                                       |
| 17 | 46091189 | 46092320 | KD2-H4K8ac_peak_12748 | 15.51374 |                                                       |
| 17 | 46092531 | 46092999 | KD2-H4K8ac_peak_12749 | 15.66774 |                                                       |
| 17 | 46095292 | 46095667 | KD2-H4K8ac_peak_12750 | 9.357    |                                                       |
| 17 | 46100799 | 46101532 | KD2-H4K8ac_peak_12751 | 5.38581  |                                                       |
| 17 | 46104133 | 46104366 | KD2-H4K8ac_peak_12752 | 9.18237  |                                                       |
| 17 | 46114466 | 46114950 | KD2-H4K8ac_peak_12753 | 10.24981 | COPZ2_ENSG0000005243;MIR152_ENSG00000207947           |
| 17 | 46115378 | 46115610 | KD2-H4K8ac_peak_12754 | 6.99815  | COPZ2_ENSG0000005243;MIR152_ENSG00000207947           |
| 17 | 46125178 | 46125403 | KD2-H4K8ac_peak_12755 | 9.08072  | RP5-890E16.2_ENSG00000263412;NFE2L1_ENSG00000082641   |
| 17 | 46125733 | 46126315 | KD2-H4K8ac_peak_12756 | 18.37277 | RP5-890E16.2_ENSG00000263412;NFE2L1_ENSG00000082641   |
| 17 | 46178980 | 46179224 | KD2-H4K8ac_peak_12757 | 9.8795   | CBX1_ENSG00000108468                                  |
| 17 | 46184903 | 46185300 | KD2-H4K8ac_peak_12758 | 11.44756 |                                                       |
| 17 | 46968502 | 46968696 | KD2-H4K8ac_peak_12759 | 7.47462  |                                                       |
| 17 | 46969259 | 46969657 | KD2-H4K8ac_peak_12760 | 15.039   | ATP5G1_ENSG00000159199                                |
| 17 | 46985883 | 46986192 | KD2-H4K8ac_peak_12761 | 6.52179  | SUMO2P17_ENSG00000248278;UBE2Z_ENSG00000159202        |
| 17 | 47021491 | 47022991 | KD2-H4K8ac_peak_12762 | 30.35433 | SNF8_ENSG00000159210                                  |
| 17 | 47269425 | 47270197 | KD2-H4K8ac_peak_12763 | 13.73635 |                                                       |
| 17 | 47438766 | 47439541 | KD2-H4K8ac_peak_12764 | 14.63726 | ZNF652_ENSG00000198740;RP11-1079K10.3_ENSG00000248714 |
| 17 | 47439804 | 47440249 | KD2-H4K8ac_peak_12765 | 7.49599  | ZNF652_ENSG00000198740                                |
| 17 | 47493163 | 47493360 | KD2-H4K8ac_peak_12766 | 6.4562   | PHB_ENSG00000167085;Y_RNA_ENSG00000207127             |
| 17 | 47513144 | 47513364 | KD2-H4K8ac_peak_12767 | 5.58725  |                                                       |
| 17 | 47532639 | 47533084 | KD2-H4K8ac_peak_12768 | 8.84009  |                                                       |
| 17 | 47547754 | 47548871 | KD2-H4K8ac_peak_12769 | 7.07117  |                                                       |
| 17 | 47572247 | 47572494 | KD2-H4K8ac_peak_12770 | 15.44609 | NGFR_ENSG00000064300                                  |
| 17 | 47572860 | 47573094 | KD2-H4K8ac_peak_12771 | 5.81222  | NGFR_ENSG00000064300                                  |
| 17 | 47573528 | 47573755 | KD2-H4K8ac_peak_12772 | 4.22101  | NGFR_ENSG00000064300                                  |
| 17 | 47586135 | 47586516 | KD2-H4K8ac_peak_12773 | 7.74292  |                                                       |
| 17 | 47591857 | 47592246 | KD2-H4K8ac_peak_12774 | 11.32417 |                                                       |
| 17 | 47592601 | 47594373 | KD2-H4K8ac_peak_12775 | 14.80472 |                                                       |
| 17 | 47596936 | 47597165 | KD2-H4K8ac_peak_12776 | 9.56945  |                                                       |
| 17 | 47597482 | 47597752 | KD2-H4K8ac_peak_12777 | 5.72657  |                                                       |
| 17 | 47601551 | 47601792 | KD2-H4K8ac_peak_12778 | 7.76329  |                                                       |
| 17 | 47633318 | 47633777 | KD2-H4K8ac_peak_12779 | 11.80283 |                                                       |
| 17 | 47646973 | 47647234 | KD2-H4K8ac_peak_12780 | 8.10216  |                                                       |
| 17 | 47754568 | 47754871 | KD2-H4K8ac_peak_12781 | 6.66692  | SPOP_ENSG00000121067                                  |
| 17 | 47784769 | 47785539 | KD2-H4K8ac_peak_12782 | 13.77586 | SLC35B1_ENSG00000121073;RP11-613C6.2_ENSG00000250751  |
| 17 | 47865225 | 47865587 | KD2-H4K8ac_peak_12783 | 5.66503  | FAM117A_ENSG00000121104;KAT7_ENSG00000136504          |
| 17 | 47866071 | 47866306 | KD2-H4K8ac_peak_12784 | 15.75541 | FAM117A_ENSG00000121104;KAT7_ENSG00000136504          |
| 17 | 47928898 | 47929095 | KD2-H4K8ac_peak_12785 | 3.90565  |                                                       |
| 17 | 48045694 | 48046438 | KD2-H4K8ac_peak_12786 | 12.23    | DLX4_ENSG00000108813                                  |

|    |          |          |                       |          |                                                      |
|----|----------|----------|-----------------------|----------|------------------------------------------------------|
| 17 | 48075856 | 48076388 | KD2-H4K8ac_peak_12787 | 11.03331 |                                                      |
| 17 | 48133115 | 48133801 | KD2-H4K8ac_peak_12788 | 12.14909 | RP11-1094H24.4_ENSG00000246640;ITGA3_ENSG00000005884 |
| 17 | 48172828 | 48173199 | KD2-H4K8ac_peak_12789 | 5.4779   | PDK2_ENSG00000005882                                 |
| 17 | 48179203 | 48179431 | KD2-H4K8ac_peak_12790 | 4.42765  | RP5-875H18.4_ENSG00000250282                         |
| 17 | 48189255 | 48189823 | KD2-H4K8ac_peak_12791 | 12.88702 |                                                      |
| 17 | 48205943 | 48207895 | KD2-H4K8ac_peak_12792 | 18.37277 | SAMD14_ENSG00000167100                               |
| 17 | 48227520 | 48227878 | KD2-H4K8ac_peak_12793 | 6.62457  | PPP1R9B_ENSG00000108819                              |
| 17 | 48228629 | 48229135 | KD2-H4K8ac_peak_12794 | 15.27939 | PPP1R9B_ENSG00000108819                              |
| 17 | 48229577 | 48230321 | KD2-H4K8ac_peak_12795 | 11.55418 |                                                      |
| 17 | 48237927 | 48238807 | KD2-H4K8ac_peak_12796 | 8.65175  | RP11-893F2.13_ENSG00000253730                        |
| 17 | 48239143 | 48239633 | KD2-H4K8ac_peak_12797 | 16.49944 | RP11-893F2.13_ENSG00000253730                        |
| 17 | 48250671 | 48251237 | KD2-H4K8ac_peak_12798 | 9.53451  |                                                      |
| 17 | 48254422 | 48254675 | KD2-H4K8ac_peak_12799 | 6.84261  |                                                      |
| 17 | 48255156 | 48256380 | KD2-H4K8ac_peak_12800 | 20.18381 |                                                      |
| 17 | 48278055 | 48278596 | KD2-H4K8ac_peak_12801 | 9.57101  | COL1A1_ENSG00000108821                               |
| 17 | 48284320 | 48284989 | KD2-H4K8ac_peak_12802 | 10.46874 |                                                      |
| 17 | 48285600 | 48285843 | KD2-H4K8ac_peak_12803 | 4.75537  | RP11-893F2.5_ENSG00000249406                         |
| 17 | 48286156 | 48286524 | KD2-H4K8ac_peak_12804 | 5.4919   | RP11-893F2.5_ENSG00000249406                         |
| 17 | 48287182 | 48288569 | KD2-H4K8ac_peak_12805 | 20.49868 | RP11-893F2.5_ENSG00000249406                         |
| 17 | 48298257 | 48298456 | KD2-H4K8ac_peak_12806 | 4.86324  |                                                      |
| 17 | 48350144 | 48350511 | KD2-H4K8ac_peak_12807 | 4.84206  |                                                      |
| 17 | 48350752 | 48350971 | KD2-H4K8ac_peak_12808 | 8.43115  |                                                      |
| 17 | 48423084 | 48423291 | KD2-H4K8ac_peak_12809 | 12.50666 | XYLT2_ENSG00000015532                                |
| 17 | 48423519 | 48424304 | KD2-H4K8ac_peak_12810 | 11.7608  | XYLT2_ENSG00000015532                                |
| 17 | 48449775 | 48450989 | KD2-H4K8ac_peak_12811 | 12.57865 | MRPL27_ENSG00000108826;EME1_ENSG00000154920          |
| 17 | 48474168 | 48474755 | KD2-H4K8ac_peak_12812 | 9.63487  | LRRCS59_ENSG00000108829;RP1-117B12.4_ENSG00000253102 |
| 17 | 48474986 | 48475502 | KD2-H4K8ac_peak_12813 | 8.63879  | LRRCS59_ENSG00000108829                              |
| 17 | 48502957 | 48503283 | KD2-H4K8ac_peak_12814 | 9.98324  | ACSF2_ENSG00000167107                                |
| 17 | 48503570 | 48504482 | KD2-H4K8ac_peak_12815 | 12.70959 | ACSF2_ENSG00000167107                                |
| 17 | 48546242 | 48546452 | KD2-H4K8ac_peak_12816 | 3.87368  | CHAD_ENSG00000136457                                 |
| 17 | 48555282 | 48556519 | KD2-H4K8ac_peak_12817 | 15.2334  | RSAD1_ENSG00000136444                                |
| 17 | 48585361 | 48586354 | KD2-H4K8ac_peak_12818 | 13.65567 | RP11-94C24.6_ENSG00000249451;MYCBPAP_ENSG00000136449 |
| 17 | 48619078 | 48619439 | KD2-H4K8ac_peak_12819 | 10.51355 | SPATA20_ENSG00000006282                              |
| 17 | 48624526 | 48625027 | KD2-H4K8ac_peak_12820 | 20.7096  |                                                      |
| 17 | 48637089 | 48637294 | KD2-H4K8ac_peak_12821 | 8.25469  |                                                      |
| 17 | 48642029 | 48643362 | KD2-H4K8ac_peak_12822 | 17.39368 | RP11-94C24.11_ENSG00000250976                        |
| 17 | 48670384 | 48670593 | KD2-H4K8ac_peak_12823 | 3.69421  |                                                      |
| 17 | 48678909 | 48679875 | KD2-H4K8ac_peak_12824 | 16.81258 |                                                      |
| 17 | 48681355 | 48681915 | KD2-H4K8ac_peak_12825 | 11.44756 |                                                      |
| 17 | 48682159 | 48682570 | KD2-H4K8ac_peak_12826 | 7.92775  |                                                      |
| 17 | 48686098 | 48686368 | KD2-H4K8ac_peak_12827 | 5.54647  |                                                      |
| 17 | 48687214 | 48687457 | KD2-H4K8ac_peak_12828 | 5.65317  |                                                      |
| 17 | 48697871 | 48698534 | KD2-H4K8ac_peak_12829 | 8.37358  |                                                      |
| 17 | 48705468 | 48705856 | KD2-H4K8ac_peak_12830 | 10.43145 |                                                      |
| 17 | 48712106 | 48712486 | KD2-H4K8ac_peak_12831 | 10.23258 | ABCC3_ENSG00000108846                                |
| 17 | 48735491 | 48735963 | KD2-H4K8ac_peak_12832 | 4.211    |                                                      |

|    |          |          |                       |          |                                                                     |
|----|----------|----------|-----------------------|----------|---------------------------------------------------------------------|
| 17 | 48737467 | 48738743 | KD2-H4K8ac_peak_12833 | 11.54384 |                                                                     |
| 17 | 48739024 | 48739323 | KD2-H4K8ac_peak_12834 | 4.86966  |                                                                     |
| 17 | 48766962 | 48767185 | KD2-H4K8ac_peak_12835 | 8.16906  |                                                                     |
| 17 | 48767767 | 48768426 | KD2-H4K8ac_peak_12836 | 14.48922 |                                                                     |
| 17 | 48784466 | 48785198 | KD2-H4K8ac_peak_12837 | 11.50346 | ANKRD40_ENSG00000154945                                             |
| 17 | 48785981 | 48786182 | KD2-H4K8ac_peak_12838 | 4.67342  | ANKRD40_ENSG00000154945                                             |
| 17 | 48786405 | 48786897 | KD2-H4K8ac_peak_12839 | 16.25886 |                                                                     |
| 17 | 48796233 | 48796749 | KD2-H4K8ac_peak_12840 | 6.87217  | LUC7L3_ENSG00000108848                                              |
| 17 | 48797003 | 48797397 | KD2-H4K8ac_peak_12841 | 16.86242 | LUC7L3_ENSG00000108848                                              |
| 17 | 48910078 | 48912232 | KD2-H4K8ac_peak_12842 | 9.95759  | WFIKKN2_ENSG00000173714                                             |
| 17 | 48944176 | 48944666 | KD2-H4K8ac_peak_12843 | 5.78173  | TOB1_ENSG00000141232;TOB1-AS1_ENSG00000229980                       |
| 17 | 48981593 | 48983194 | KD2-H4K8ac_peak_12844 | 12.85233 |                                                                     |
| 17 | 48992451 | 48992731 | KD2-H4K8ac_peak_12845 | 13.5461  |                                                                     |
| 17 | 48995235 | 48997711 | KD2-H4K8ac_peak_12846 | 35.03449 |                                                                     |
| 17 | 49000707 | 49001293 | KD2-H4K8ac_peak_12847 | 5.75757  |                                                                     |
| 17 | 49006974 | 49007542 | KD2-H4K8ac_peak_12848 | 7.07117  |                                                                     |
| 17 | 49008312 | 49008580 | KD2-H4K8ac_peak_12849 | 6.31838  |                                                                     |
| 17 | 49008773 | 49009219 | KD2-H4K8ac_peak_12850 | 25.83468 |                                                                     |
| 17 | 49009649 | 49010171 | KD2-H4K8ac_peak_12851 | 8.53092  |                                                                     |
| 17 | 49012426 | 49013080 | KD2-H4K8ac_peak_12852 | 5.98692  |                                                                     |
| 17 | 49019857 | 49020077 | KD2-H4K8ac_peak_12853 | 7.36799  |                                                                     |
| 17 | 49021389 | 49021939 | KD2-H4K8ac_peak_12854 | 21.46903 | RP11-700H6.1_ENSG00000247011;RP11-700H6.2_ENSG00000251665           |
| 17 | 49025111 | 49025767 | KD2-H4K8ac_peak_12855 | 11.04256 |                                                                     |
| 17 | 49026609 | 49027230 | KD2-H4K8ac_peak_12856 | 13.12288 |                                                                     |
| 17 | 49027711 | 49027959 | KD2-H4K8ac_peak_12857 | 7.81657  |                                                                     |
| 17 | 49030938 | 49032936 | KD2-H4K8ac_peak_12858 | 25.84288 |                                                                     |
| 17 | 49126754 | 49127104 | KD2-H4K8ac_peak_12859 | 4.42765  |                                                                     |
| 17 | 49198519 | 49199218 | KD2-H4K8ac_peak_12860 | 8.59579  | SPAG9_ENSG00000008294                                               |
| 17 | 49229590 | 49229918 | KD2-H4K8ac_peak_12861 | 7.07117  | NME1_ENSG00000239672                                                |
| 17 | 49230269 | 49230547 | KD2-H4K8ac_peak_12862 | 6.65673  | NME1_ENSG00000239672;NME1-NME2_ENSG00000243678;NME2_ENSG00000011052 |
| 17 | 49231023 | 49231365 | KD2-H4K8ac_peak_12863 | 6.99815  | NME1_ENSG00000239672;NME1-NME2_ENSG00000243678;NME2_ENSG00000011052 |
| 17 | 49242724 | 49243532 | KD2-H4K8ac_peak_12864 | 11.82518 |                                                                     |
| 17 | 49243817 | 49244337 | KD2-H4K8ac_peak_12865 | 6.01128  |                                                                     |
| 17 | 49337065 | 49337392 | KD2-H4K8ac_peak_12866 | 12.00597 | MBTD1_ENSG00000011258;UTP18_ENSG00000011260                         |
| 17 | 49337977 | 49338317 | KD2-H4K8ac_peak_12867 | 13.65567 | MBTD1_ENSG00000011258;UTP18_ENSG00000011260                         |
| 17 | 49432493 | 49432989 | KD2-H4K8ac_peak_12868 | 12.13241 |                                                                     |
| 17 | 49577334 | 49577570 | KD2-H4K8ac_peak_12869 | 9.36516  |                                                                     |
| 17 | 49585305 | 49585601 | KD2-H4K8ac_peak_12870 | 5.54647  |                                                                     |
| 17 | 50558715 | 50558938 | KD2-H4K8ac_peak_12871 | 6.16888  |                                                                     |
| 17 | 52937427 | 52937763 | KD2-H4K8ac_peak_12872 | 10.05606 |                                                                     |
| 17 | 52977332 | 52978746 | KD2-H4K8ac_peak_12873 | 11.24702 | TOM1L1_ENSG00000141198                                              |
| 17 | 52981503 | 52981695 | KD2-H4K8ac_peak_12874 | 7.146    |                                                                     |
| 17 | 53045750 | 53045988 | KD2-H4K8ac_peak_12875 | 7.92775  | COX11_ENSG00000166260;STXBP4_ENSG00000166263                        |
| 17 | 53046200 | 53046643 | KD2-H4K8ac_peak_12876 | 16.71655 | COX11_ENSG00000166260;STXBP4_ENSG00000166263                        |
| 17 | 53341147 | 53341459 | KD2-H4K8ac_peak_12877 | 3.87368  | HLF_ENSG00000108924                                                 |
| 17 | 53498147 | 53498489 | KD2-H4K8ac_peak_12878 | 6.48713  | MMD_ENSG00000108960                                                 |

|    |          |          |                       |          |                                                     |
|----|----------|----------|-----------------------|----------|-----------------------------------------------------|
| 17 | 53498805 | 53499224 | KD2-H4K8ac_peak_12879 | 11.80283 | MMD_ENSG00000108960                                 |
| 17 | 53507561 | 53508286 | KD2-H4K8ac_peak_12880 | 11.05467 |                                                     |
| 17 | 53510586 | 53510790 | KD2-H4K8ac_peak_12881 | 6.08655  |                                                     |
| 17 | 53517352 | 53517558 | KD2-H4K8ac_peak_12882 | 8.55271  |                                                     |
| 17 | 53518286 | 53518688 | KD2-H4K8ac_peak_12883 | 12.84642 |                                                     |
| 17 | 53644867 | 53645371 | KD2-H4K8ac_peak_12884 | 6.05809  |                                                     |
| 17 | 53753040 | 53753340 | KD2-H4K8ac_peak_12885 | 8.30974  |                                                     |
| 17 | 53766670 | 53767170 | KD2-H4K8ac_peak_12886 | 5.20908  |                                                     |
| 17 | 53776373 | 53776625 | KD2-H4K8ac_peak_12887 | 5.92591  |                                                     |
| 17 | 53784343 | 53784854 | KD2-H4K8ac_peak_12888 | 6.99815  |                                                     |
| 17 | 53828567 | 53828806 | KD2-H4K8ac_peak_12889 | 3.82059  | PCTP_ENSG00000141179                                |
| 17 | 54910936 | 54911229 | KD2-H4K8ac_peak_12890 | 12.88702 | DGKE_ENSG00000153933                                |
| 17 | 54991187 | 54991965 | KD2-H4K8ac_peak_12891 | 24.82509 | TRIM25_ENSG00000121060                              |
| 17 | 55037461 | 55037882 | KD2-H4K8ac_peak_12892 | 15.01306 | COIL_ENSG00000121058                                |
| 17 | 55038126 | 55038355 | KD2-H4K8ac_peak_12893 | 12.08081 | COIL_ENSG00000121058                                |
| 17 | 55056522 | 55056730 | KD2-H4K8ac_peak_12894 | 9.908    |                                                     |
| 17 | 55087628 | 55087821 | KD2-H4K8ac_peak_12895 | 5.88845  |                                                     |
| 17 | 55162642 | 55162977 | KD2-H4K8ac_peak_12896 | 17.19699 | RP11-166P13.3_ENSG00000263004;AKAP1_ENSG00000121057 |
| 17 | 55163182 | 55163584 | KD2-H4K8ac_peak_12897 | 5.75757  | RP11-166P13.3_ENSG00000263004;AKAP1_ENSG00000121057 |
| 17 | 55174917 | 55175233 | KD2-H4K8ac_peak_12898 | 3.97079  |                                                     |
| 17 | 55210910 | 55211252 | KD2-H4K8ac_peak_12899 | 10.19949 |                                                     |
| 17 | 55212925 | 55213488 | KD2-H4K8ac_peak_12900 | 7.51054  |                                                     |
| 17 | 55213831 | 55214053 | KD2-H4K8ac_peak_12901 | 7.20567  |                                                     |
| 17 | 55332781 | 55333769 | KD2-H4K8ac_peak_12902 | 14.69247 | MSI2_ENSG00000153944                                |
| 17 | 55363776 | 55364000 | KD2-H4K8ac_peak_12903 | 4.67342  |                                                     |
| 17 | 55370601 | 55370826 | KD2-H4K8ac_peak_12904 | 6.34074  |                                                     |
| 17 | 55443400 | 55443917 | KD2-H4K8ac_peak_12905 | 6.90231  |                                                     |
| 17 | 55447606 | 55447958 | KD2-H4K8ac_peak_12906 | 8.53092  |                                                     |
| 17 | 55456270 | 55456530 | KD2-H4K8ac_peak_12907 | 7.76329  |                                                     |
| 17 | 55457713 | 55457932 | KD2-H4K8ac_peak_12908 | 7.07154  |                                                     |
| 17 | 55458526 | 55458896 | KD2-H4K8ac_peak_12909 | 6.50449  |                                                     |
| 17 | 55497915 | 55498107 | KD2-H4K8ac_peak_12910 | 8.4716   |                                                     |
| 17 | 55498777 | 55499144 | KD2-H4K8ac_peak_12911 | 10.83984 |                                                     |
| 17 | 55515372 | 55515675 | KD2-H4K8ac_peak_12912 | 21.12734 |                                                     |
| 17 | 55516082 | 55516461 | KD2-H4K8ac_peak_12913 | 6.16883  |                                                     |
| 17 | 55517491 | 55517721 | KD2-H4K8ac_peak_12914 | 10.58745 |                                                     |
| 17 | 55518182 | 55518806 | KD2-H4K8ac_peak_12915 | 8.79891  |                                                     |
| 17 | 55520485 | 55520893 | KD2-H4K8ac_peak_12916 | 4.84794  |                                                     |
| 17 | 55543499 | 55543809 | KD2-H4K8ac_peak_12917 | 4.86324  |                                                     |
| 17 | 55582547 | 55582769 | KD2-H4K8ac_peak_12918 | 9.28804  |                                                     |
| 17 | 55583737 | 55584357 | KD2-H4K8ac_peak_12919 | 12.93105 |                                                     |
| 17 | 55586753 | 55586998 | KD2-H4K8ac_peak_12920 | 7.7192   |                                                     |
| 17 | 55594715 | 55595427 | KD2-H4K8ac_peak_12921 | 15.82362 |                                                     |
| 17 | 55601388 | 55601590 | KD2-H4K8ac_peak_12922 | 7.76329  | RP11-118E18.2_ENSG00000266100                       |
| 17 | 55604818 | 55605049 | KD2-H4K8ac_peak_12923 | 6.99815  |                                                     |
| 17 | 55609298 | 55609719 | KD2-H4K8ac_peak_12924 | 8.58069  |                                                     |

|    |          |          |                       |          |
|----|----------|----------|-----------------------|----------|
| 17 | 55609983 | 55610775 | KD2-H4K8ac_peak_12925 | 9.34989  |
| 17 | 55610973 | 55611292 | KD2-H4K8ac_peak_12926 | 15.05364 |
| 17 | 55611743 | 55613225 | KD2-H4K8ac_peak_12927 | 14.73375 |
| 17 | 55613694 | 55614784 | KD2-H4K8ac_peak_12928 | 21.83552 |
| 17 | 55615168 | 55616009 | KD2-H4K8ac_peak_12929 | 27.69612 |
| 17 | 55616701 | 55616920 | KD2-H4K8ac_peak_12930 | 12.79505 |
| 17 | 55617140 | 55617508 | KD2-H4K8ac_peak_12931 | 14.69247 |
| 17 | 55617796 | 55618443 | KD2-H4K8ac_peak_12932 | 12.69561 |
| 17 | 55618753 | 55620532 | KD2-H4K8ac_peak_12933 | 12.82393 |
| 17 | 55621369 | 55621820 | KD2-H4K8ac_peak_12934 | 8.30974  |
| 17 | 55622027 | 55622955 | KD2-H4K8ac_peak_12935 | 12.70308 |
| 17 | 55623511 | 55624792 | KD2-H4K8ac_peak_12936 | 23.13674 |
| 17 | 55626420 | 55626646 | KD2-H4K8ac_peak_12937 | 6.99825  |
| 17 | 55627048 | 55627416 | KD2-H4K8ac_peak_12938 | 7.43893  |
| 17 | 55628514 | 55629670 | KD2-H4K8ac_peak_12939 | 20.76696 |
| 17 | 55630454 | 55630738 | KD2-H4K8ac_peak_12940 | 11.05467 |
| 17 | 55630994 | 55631265 | KD2-H4K8ac_peak_12941 | 8.81774  |
| 17 | 55632179 | 55633043 | KD2-H4K8ac_peak_12942 | 9.95119  |
| 17 | 55635723 | 55636245 | KD2-H4K8ac_peak_12943 | 9.34195  |
| 17 | 55637014 | 55637367 | KD2-H4K8ac_peak_12944 | 14.57327 |
| 17 | 55637639 | 55639273 | KD2-H4K8ac_peak_12945 | 13.77586 |
| 17 | 55639597 | 55640353 | KD2-H4K8ac_peak_12946 | 14.48776 |
| 17 | 55640763 | 55641416 | KD2-H4K8ac_peak_12947 | 13.42798 |
| 17 | 55641798 | 55642326 | KD2-H4K8ac_peak_12948 | 9.53451  |
| 17 | 55642682 | 55643478 | KD2-H4K8ac_peak_12949 | 13.3695  |
| 17 | 55643805 | 55644494 | KD2-H4K8ac_peak_12950 | 18.96365 |
| 17 | 55645041 | 55646324 | KD2-H4K8ac_peak_12951 | 11.05467 |
| 17 | 55647661 | 55647960 | KD2-H4K8ac_peak_12952 | 8.60771  |
| 17 | 55648337 | 55648902 | KD2-H4K8ac_peak_12953 | 8.5564   |
| 17 | 55649161 | 55649551 | KD2-H4K8ac_peak_12954 | 10.43145 |
| 17 | 55649887 | 55650493 | KD2-H4K8ac_peak_12955 | 8.63354  |
| 17 | 55651886 | 55652108 | KD2-H4K8ac_peak_12956 | 7.76104  |
| 17 | 55652645 | 55653161 | KD2-H4K8ac_peak_12957 | 5.85291  |
| 17 | 55656651 | 55657089 | KD2-H4K8ac_peak_12958 | 8.86099  |
| 17 | 55661031 | 55661250 | KD2-H4K8ac_peak_12959 | 7.90806  |
| 17 | 55661761 | 55662491 | KD2-H4K8ac_peak_12960 | 5.94405  |
| 17 | 55662899 | 55663219 | KD2-H4K8ac_peak_12961 | 5.72657  |
| 17 | 55663994 | 55664658 | KD2-H4K8ac_peak_12962 | 10.39103 |
| 17 | 55665389 | 55665829 | KD2-H4K8ac_peak_12963 | 10.01546 |
| 17 | 55671518 | 55671807 | KD2-H4K8ac_peak_12964 | 6.76298  |
| 17 | 55673317 | 55674178 | KD2-H4K8ac_peak_12965 | 3.83717  |
| 17 | 55674993 | 55675261 | KD2-H4K8ac_peak_12966 | 4.54006  |
| 17 | 55675988 | 55677317 | KD2-H4K8ac_peak_12967 | 15.66774 |
| 17 | 55678353 | 55678887 | KD2-H4K8ac_peak_12968 | 6.7209   |
| 17 | 55680066 | 55680750 | KD2-H4K8ac_peak_12969 | 9.18237  |
| 17 | 55681308 | 55682245 | KD2-H4K8ac_peak_12970 | 14.99434 |

|    |          |          |                       |          |                               |
|----|----------|----------|-----------------------|----------|-------------------------------|
| 17 | 55682499 | 55682947 | KD2-H4K8ac_peak_12971 | 7.73264  |                               |
| 17 | 55683149 | 55683913 | KD2-H4K8ac_peak_12972 | 13.35993 |                               |
| 17 | 55684767 | 55685270 | KD2-H4K8ac_peak_12973 | 5.96768  | RP11-118E18.4_ENSG00000263499 |
| 17 | 55685524 | 55685923 | KD2-H4K8ac_peak_12974 | 4.33139  | RP11-118E18.4_ENSG00000263499 |
| 17 | 55691322 | 55691804 | KD2-H4K8ac_peak_12975 | 7.13615  |                               |
| 17 | 55696614 | 55696911 | KD2-H4K8ac_peak_12976 | 4.37809  |                               |
| 17 | 55697992 | 55698499 | KD2-H4K8ac_peak_12977 | 13.58614 |                               |
| 17 | 55699441 | 55700337 | KD2-H4K8ac_peak_12978 | 10.83984 |                               |
| 17 | 55700686 | 55700986 | KD2-H4K8ac_peak_12979 | 9.94905  |                               |
| 17 | 55701805 | 55704067 | KD2-H4K8ac_peak_12980 | 17.42905 |                               |
| 17 | 55713902 | 55714286 | KD2-H4K8ac_peak_12981 | 5.13615  |                               |
| 17 | 55727086 | 55727383 | KD2-H4K8ac_peak_12982 | 4.86324  |                               |
| 17 | 55738954 | 55739438 | KD2-H4K8ac_peak_12983 | 9.29151  |                               |
| 17 | 55740714 | 55742106 | KD2-H4K8ac_peak_12984 | 12.40421 |                               |
| 17 | 55742433 | 55742726 | KD2-H4K8ac_peak_12985 | 6.93515  |                               |
| 17 | 55743077 | 55743927 | KD2-H4K8ac_peak_12986 | 13.39388 |                               |
| 17 | 55744510 | 55745654 | KD2-H4K8ac_peak_12987 | 14.17488 |                               |
| 17 | 55746541 | 55746810 | KD2-H4K8ac_peak_12988 | 9.26408  |                               |
| 17 | 55747068 | 55747803 | KD2-H4K8ac_peak_12989 | 9.95119  |                               |
| 17 | 55748400 | 55748889 | KD2-H4K8ac_peak_12990 | 10.17341 |                               |
| 17 | 55749885 | 55750080 | KD2-H4K8ac_peak_12991 | 5.48272  |                               |
| 17 | 55750632 | 55750824 | KD2-H4K8ac_peak_12992 | 6.16883  |                               |
| 17 | 55752424 | 55752675 | KD2-H4K8ac_peak_12993 | 8.10216  |                               |
| 17 | 55777046 | 55777291 | KD2-H4K8ac_peak_12994 | 8.28234  |                               |
| 17 | 55785539 | 55786163 | KD2-H4K8ac_peak_12995 | 11.28765 |                               |
| 17 | 55817589 | 55817995 | KD2-H4K8ac_peak_12996 | 5.75757  |                               |
| 17 | 55818287 | 55818595 | KD2-H4K8ac_peak_12997 | 5.26288  |                               |
| 17 | 55818933 | 55819205 | KD2-H4K8ac_peak_12998 | 5.06602  |                               |
| 17 | 55825482 | 55825845 | KD2-H4K8ac_peak_12999 | 9.34195  |                               |
| 17 | 55826227 | 55826676 | KD2-H4K8ac_peak_13000 | 5.34636  |                               |
| 17 | 55827522 | 55828619 | KD2-H4K8ac_peak_13001 | 24.23147 |                               |
| 17 | 55828834 | 55829547 | KD2-H4K8ac_peak_13002 | 13.354   |                               |
| 17 | 55829986 | 55830411 | KD2-H4K8ac_peak_13003 | 11.9364  |                               |
| 17 | 55835046 | 55835904 | KD2-H4K8ac_peak_13004 | 5.3157   |                               |
| 17 | 55836393 | 55836650 | KD2-H4K8ac_peak_13005 | 10.7186  |                               |
| 17 | 55839035 | 55841312 | KD2-H4K8ac_peak_13006 | 12.93209 |                               |
| 17 | 55857635 | 55858107 | KD2-H4K8ac_peak_13007 | 5.01002  |                               |
| 17 | 55858731 | 55860640 | KD2-H4K8ac_peak_13008 | 15.82743 |                               |
| 17 | 55860900 | 55861105 | KD2-H4K8ac_peak_13009 | 12.30509 |                               |
| 17 | 55861625 | 55861885 | KD2-H4K8ac_peak_13010 | 3.82395  |                               |
| 17 | 55886883 | 55887085 | KD2-H4K8ac_peak_13011 | 5.13615  |                               |
| 17 | 55887360 | 55887662 | KD2-H4K8ac_peak_13012 | 6.04107  |                               |
| 17 | 55888034 | 55888630 | KD2-H4K8ac_peak_13013 | 21.6161  |                               |
| 17 | 55889005 | 55889524 | KD2-H4K8ac_peak_13014 | 19.55721 |                               |
| 17 | 55909049 | 55909332 | KD2-H4K8ac_peak_13015 | 7.70067  |                               |
| 17 | 55909952 | 55910793 | KD2-H4K8ac_peak_13016 | 11.92978 |                               |

|    |          |          |                       |          |                                                       |
|----|----------|----------|-----------------------|----------|-------------------------------------------------------|
| 17 | 55923572 | 55923774 | KD2-H4K8ac_peak_13017 | 6.22746  |                                                       |
| 17 | 55927690 | 55928037 | KD2-H4K8ac_peak_13018 | 5.38581  | MRPS23_ENSG00000181610                                |
| 17 | 55945286 | 55945501 | KD2-H4K8ac_peak_13019 | 7.20116  |                                                       |
| 17 | 55981987 | 55982312 | KD2-H4K8ac_peak_13020 | 10.33975 |                                                       |
| 17 | 56032060 | 56032624 | KD2-H4K8ac_peak_13021 | 25.00847 | CUEDC1_ENSG00000180891                                |
| 17 | 56032880 | 56033178 | KD2-H4K8ac_peak_13022 | 7.73264  | CUEDC1_ENSG00000180891                                |
| 17 | 56065019 | 56066454 | KD2-H4K8ac_peak_13023 | 23.72814 | VEZFI_ENSG00000136451                                 |
| 17 | 56083964 | 56084979 | KD2-H4K8ac_peak_13024 | 45.30175 | SRSF1_ENSG00000136450                                 |
| 17 | 56085227 | 56085481 | KD2-H4K8ac_peak_13025 | 9.95342  | SRSF1_ENSG00000136450                                 |
| 17 | 56159973 | 56160548 | KD2-H4K8ac_peak_13026 | 20.40378 | RP11-159D12.10_ENSG00000266290;DYNLL2_ENSG00000264364 |
| 17 | 56296195 | 56296564 | KD2-H4K8ac_peak_13027 | 8.86099  | MKS1_ENSG00000011143;LPO_ENSG00000167419              |
| 17 | 56296811 | 56297042 | KD2-H4K8ac_peak_13028 | 12.13241 | MKS1_ENSG00000011143;LPO_ENSG00000167419              |
| 17 | 56326697 | 56327104 | KD2-H4K8ac_peak_13029 | 5.13615  |                                                       |
| 17 | 56401200 | 56402482 | KD2-H4K8ac_peak_13030 | 22.92963 | BZRAP1-AS1_ENSG00000265148                            |
| 17 | 56405963 | 56406171 | KD2-H4K8ac_peak_13031 | 13.12288 | BZRAP1_ENSG00000005379                                |
| 17 | 56416303 | 56417063 | KD2-H4K8ac_peak_13032 | 7.09076  |                                                       |
| 17 | 56429111 | 56430110 | KD2-H4K8ac_peak_13033 | 16.54484 | SUPT4H1_ENSG00000213246                               |
| 17 | 56591485 | 56591915 | KD2-H4K8ac_peak_13034 | 18.43734 |                                                       |
| 17 | 56594788 | 56595174 | KD2-H4K8ac_peak_13035 | 12.88702 | MTMR4_ENSG00000108389                                 |
| 17 | 56595864 | 56596068 | KD2-H4K8ac_peak_13036 | 7.36799  | MTMR4_ENSG00000108389                                 |
| 17 | 56596334 | 56596810 | KD2-H4K8ac_peak_13037 | 6.84261  | RP11-112H10.4_ENSG00000264672                         |
| 17 | 56597136 | 56597668 | KD2-H4K8ac_peak_13038 | 14.06758 | RP11-112H10.4_ENSG00000264672                         |
| 17 | 56608761 | 56609624 | KD2-H4K8ac_peak_13039 | 10.44656 |                                                       |
| 17 | 56708489 | 56708786 | KD2-H4K8ac_peak_13040 | 5.75757  | U3_ENSG00000212195                                    |
| 17 | 56709605 | 56710099 | KD2-H4K8ac_peak_13041 | 11.92978 | U3_ENSG00000212195                                    |
| 17 | 56737077 | 56737289 | KD2-H4K8ac_peak_13042 | 7.67504  | RNU1-60P_ENSG00000202077                              |
| 17 | 56769183 | 56770327 | KD2-H4K8ac_peak_13043 | 12.37731 | TEX14_ENSG00000121101;RAD51C_ENSG00000108384          |
| 17 | 56833284 | 56833787 | KD2-H4K8ac_peak_13044 | 8.85813  | PPM1E_ENSG00000175175                                 |
| 17 | 56863400 | 56863674 | KD2-H4K8ac_peak_13045 | 13.9234  |                                                       |
| 17 | 57183604 | 57184077 | KD2-H4K8ac_peak_13046 | 15.27939 | TRIM37_ENSG00000108395;AC099850.1_ENSG00000224738     |
| 17 | 57184397 | 57184846 | KD2-H4K8ac_peak_13047 | 13.27022 | TRIM37_ENSG00000108395;AC099850.1_ENSG00000224738     |
| 17 | 57231231 | 57231454 | KD2-H4K8ac_peak_13048 | 7.77027  |                                                       |
| 17 | 57231705 | 57232180 | KD2-H4K8ac_peak_13049 | 6.20982  | SKA2_ENSG00000182628;PRR11_ENSG00000068489            |
| 17 | 57242890 | 57243108 | KD2-H4K8ac_peak_13050 | 6.90231  |                                                       |
| 17 | 57286731 | 57287212 | KD2-H4K8ac_peak_13051 | 14.00658 | SMG8_ENSG00000167447                                  |
| 17 | 57287409 | 57287869 | KD2-H4K8ac_peak_13052 | 13.92465 | SMG8_ENSG00000167447                                  |
| 17 | 57298027 | 57298694 | KD2-H4K8ac_peak_13053 | 7.28628  | GDPD1_ENSG00000153982                                 |
| 17 | 57443047 | 57443363 | KD2-H4K8ac_peak_13054 | 4.75875  | MIR4729_ENSG00000263857                               |
| 17 | 57448693 | 57449069 | KD2-H4K8ac_peak_13055 | 8.79106  |                                                       |
| 17 | 57464209 | 57464541 | KD2-H4K8ac_peak_13056 | 9.07715  |                                                       |
| 17 | 57465240 | 57465568 | KD2-H4K8ac_peak_13057 | 12.17278 |                                                       |
| 17 | 57501177 | 57501663 | KD2-H4K8ac_peak_13058 | 5.30799  |                                                       |
| 17 | 57502632 | 57503511 | KD2-H4K8ac_peak_13059 | 8.85813  |                                                       |
| 17 | 57577023 | 57577309 | KD2-H4K8ac_peak_13060 | 8.10216  |                                                       |
| 17 | 57577512 | 57578042 | KD2-H4K8ac_peak_13061 | 17.19888 |                                                       |
| 17 | 57590824 | 57591018 | KD2-H4K8ac_peak_13062 | 7.62364  |                                                       |



|    |          |          |                       |          |                                                      |
|----|----------|----------|-----------------------|----------|------------------------------------------------------|
| 17 | 57591993 | 57592423 | KD2-H4K8ac_peak_13063 | 6.98292  |                                                      |
| 17 | 57623845 | 57624234 | KD2-H4K8ac_peak_13064 | 11.35142 |                                                      |
| 17 | 57625037 | 57625616 | KD2-H4K8ac_peak_13065 | 7.36799  |                                                      |
| 17 | 57642546 | 57642864 | KD2-H4K8ac_peak_13066 | 18.51132 | DHX40_ENSG00000108406                                |
| 17 | 57696107 | 57697518 | KD2-H4K8ac_peak_13067 | 18.95603 | CLTC_ENSG00000141367                                 |
| 17 | 57784118 | 57784733 | KD2-H4K8ac_peak_13068 | 13.42721 | PTRH2_ENSG00000141378;VMP1_ENSG00000062716           |
| 17 | 57970526 | 57970906 | KD2-H4K8ac_peak_13069 | 19.92174 | TUBD1_ENSG00000108423;RPS6KB1_ENSG00000108443        |
| 17 | 58042370 | 58042836 | KD2-H4K8ac_peak_13070 | 6.97919  | RNFT1_ENSG00000189050;RP11-178C3.2_ENSG00000267302   |
| 17 | 58114785 | 58115156 | KD2-H4K8ac_peak_13071 | 6.80998  |                                                      |
| 17 | 58155737 | 58156248 | KD2-H4K8ac_peak_13072 | 17.27647 | HEATR6_ENSG00000068097;CTD-2319I12.2_ENSG00000267416 |
| 17 | 58156470 | 58156827 | KD2-H4K8ac_peak_13073 | 5.92591  | HEATR6_ENSG00000068097;CTD-2319I12.2_ENSG00000267416 |
| 17 | 58157051 | 58157423 | KD2-H4K8ac_peak_13074 | 4.08993  | HEATR6_ENSG00000068097;CTD-2319I12.2_ENSG00000267416 |
| 17 | 58213180 | 58213926 | KD2-H4K8ac_peak_13075 | 17.09929 | CTD-2319I12.4_ENSG00000267248                        |
| 17 | 58219262 | 58219460 | KD2-H4K8ac_peak_13076 | 6.77511  |                                                      |
| 17 | 58220478 | 58220853 | KD2-H4K8ac_peak_13077 | 9.63487  |                                                      |
| 17 | 58227204 | 58227494 | KD2-H4K8ac_peak_13078 | 5.75757  | CA4_ENSG00000167434                                  |
| 17 | 58469028 | 58469338 | KD2-H4K8ac_peak_13079 | 11.83301 | C17orf64_ENSG00000141371                             |
| 17 | 58469586 | 58470785 | KD2-H4K8ac_peak_13080 | 7.49599  | C17orf64_ENSG00000141371                             |
| 17 | 58498755 | 58499445 | KD2-H4K8ac_peak_13081 | 11.00372 | USP32_ENSG00000170832                                |
| 17 | 58547618 | 58548000 | KD2-H4K8ac_peak_13082 | 5.54647  |                                                      |
| 17 | 58602939 | 58603559 | KD2-H4K8ac_peak_13083 | 11.7608  | APPBP2_ENSG00000062725;RP11-15E18.1_ENSG00000259349  |
| 17 | 58676766 | 58677356 | KD2-H4K8ac_peak_13084 | 12.00597 | PPM1D_ENSG00000170836                                |
| 17 | 58677684 | 58678176 | KD2-H4K8ac_peak_13085 | 12.40345 | PPM1D_ENSG00000170836                                |
| 17 | 58908355 | 58908825 | KD2-H4K8ac_peak_13086 | 7.76329  |                                                      |
| 17 | 59096452 | 59096661 | KD2-H4K8ac_peak_13087 | 7.40111  |                                                      |
| 17 | 59142532 | 59142904 | KD2-H4K8ac_peak_13088 | 4.75764  |                                                      |
| 17 | 59213341 | 59213540 | KD2-H4K8ac_peak_13089 | 6.60096  | RP11-136H19.1_ENSG00000267667                        |
| 17 | 59218812 | 59219156 | KD2-H4K8ac_peak_13090 | 8.23796  |                                                      |
| 17 | 59220829 | 59221507 | KD2-H4K8ac_peak_13091 | 14.38358 |                                                      |
| 17 | 59223370 | 59223970 | KD2-H4K8ac_peak_13092 | 7.76104  |                                                      |
| 17 | 59224371 | 59224618 | KD2-H4K8ac_peak_13093 | 4.44527  |                                                      |
| 17 | 59225783 | 59225989 | KD2-H4K8ac_peak_13094 | 6.25869  |                                                      |
| 17 | 59235337 | 59235762 | KD2-H4K8ac_peak_13095 | 4.71229  |                                                      |
| 17 | 59238079 | 59238377 | KD2-H4K8ac_peak_13096 | 6.66692  |                                                      |
| 17 | 59239569 | 59239929 | KD2-H4K8ac_peak_13097 | 7.70289  |                                                      |
| 17 | 59240455 | 59240732 | KD2-H4K8ac_peak_13098 | 10.61986 |                                                      |
| 17 | 59273424 | 59273871 | KD2-H4K8ac_peak_13099 | 4.54006  |                                                      |
| 17 | 59281184 | 59281437 | KD2-H4K8ac_peak_13100 | 5.51783  |                                                      |
| 17 | 59392421 | 59392644 | KD2-H4K8ac_peak_13101 | 7.49599  |                                                      |
| 17 | 59392848 | 59393074 | KD2-H4K8ac_peak_13102 | 8.82366  |                                                      |
| 17 | 59402397 | 59402947 | KD2-H4K8ac_peak_13103 | 6.36375  |                                                      |
| 17 | 59403480 | 59403743 | KD2-H4K8ac_peak_13104 | 4.04573  |                                                      |
| 17 | 59457332 | 59457698 | KD2-H4K8ac_peak_13105 | 4.54006  |                                                      |
| 17 | 59458701 | 59459755 | KD2-H4K8ac_peak_13106 | 10.4745  | RP11-332H18.3_ENSG00000266934                        |
| 17 | 59460146 | 59460995 | KD2-H4K8ac_peak_13107 | 16.79057 | RP11-332H18.3_ENSG00000266934                        |
| 17 | 59461280 | 59462387 | KD2-H4K8ac_peak_13108 | 17.69527 |                                                      |

|    |          |          |                       |          |                                                        |
|----|----------|----------|-----------------------|----------|--------------------------------------------------------|
| 17 | 59462639 | 59463140 | KD2-H4K8ac_peak_13109 | 16.67374 |                                                        |
| 17 | 59463597 | 59464065 | KD2-H4K8ac_peak_13110 | 8.58725  |                                                        |
| 17 | 59464350 | 59464772 | KD2-H4K8ac_peak_13111 | 7.64096  |                                                        |
| 17 | 59466727 | 59467199 | KD2-H4K8ac_peak_13112 | 5.64429  |                                                        |
| 17 | 59474141 | 59475030 | KD2-H4K8ac_peak_13113 | 13.3695  |                                                        |
| 17 | 59475308 | 59475695 | KD2-H4K8ac_peak_13114 | 9.20193  |                                                        |
| 17 | 59476280 | 59476908 | KD2-H4K8ac_peak_13115 | 8.16823  | RP11-332H18.5_ENSG00000267131;TBX2_ENSG00000121068     |
| 17 | 59478074 | 59478531 | KD2-H4K8ac_peak_13116 | 6.52179  | RP11-332H18.5_ENSG00000267131;TBX2_ENSG00000121068     |
| 17 | 59480513 | 59480711 | KD2-H4K8ac_peak_13117 | 4.30804  |                                                        |
| 17 | 59488600 | 59488904 | KD2-H4K8ac_peak_13118 | 4.30033  | RP11-332H18.4_ENSG00000267280;C17orf82_ENSG00000187013 |
| 17 | 59489223 | 59489733 | KD2-H4K8ac_peak_13119 | 21.04966 | RP11-332H18.4_ENSG00000267280;C17orf82_ENSG00000187013 |
| 17 | 59489991 | 59490665 | KD2-H4K8ac_peak_13120 | 18.15393 | C17orf82_ENSG00000187013                               |
| 17 | 59493095 | 59494238 | KD2-H4K8ac_peak_13121 | 29.1097  |                                                        |
| 17 | 59494602 | 59494816 | KD2-H4K8ac_peak_13122 | 5.3157   |                                                        |
| 17 | 59539360 | 59539574 | KD2-H4K8ac_peak_13123 | 4.52514  |                                                        |
| 17 | 59544803 | 59545873 | KD2-H4K8ac_peak_13124 | 5.01002  |                                                        |
| 17 | 59562803 | 59564178 | KD2-H4K8ac_peak_13125 | 15.93337 |                                                        |
| 17 | 59564486 | 59564944 | KD2-H4K8ac_peak_13126 | 5.49478  |                                                        |
| 17 | 59565311 | 59565882 | KD2-H4K8ac_peak_13127 | 13.65567 |                                                        |
| 17 | 59566845 | 59567328 | KD2-H4K8ac_peak_13128 | 6.99815  |                                                        |
| 17 | 59573793 | 59574346 | KD2-H4K8ac_peak_13129 | 9.94337  |                                                        |
| 17 | 59574554 | 59574860 | KD2-H4K8ac_peak_13130 | 8.79106  |                                                        |
| 17 | 59634939 | 59635166 | KD2-H4K8ac_peak_13131 | 6.99815  |                                                        |
| 17 | 59652537 | 59652849 | KD2-H4K8ac_peak_13132 | 5.405    |                                                        |
| 17 | 59661182 | 59661519 | KD2-H4K8ac_peak_13133 | 6.99815  |                                                        |
| 17 | 59834603 | 59834907 | KD2-H4K8ac_peak_13134 | 4.98072  |                                                        |
| 17 | 59835146 | 59835349 | KD2-H4K8ac_peak_13135 | 7.48822  |                                                        |
| 17 | 59864962 | 59865248 | KD2-H4K8ac_peak_13136 | 6.27931  |                                                        |
| 17 | 59940495 | 59940821 | KD2-H4K8ac_peak_13137 | 6.20982  | BRIP1_ENSG00000136492                                  |
| 17 | 60004891 | 60005259 | KD2-H4K8ac_peak_13138 | 15.75541 | INTS2_ENSG00000108506                                  |
| 17 | 60005519 | 60005950 | KD2-H4K8ac_peak_13139 | 7.76329  | INTS2_ENSG00000108506                                  |
| 17 | 60142893 | 60143255 | KD2-H4K8ac_peak_13140 | 12.57865 | MED13_ENSG00000108510                                  |
| 17 | 60197668 | 60197866 | KD2-H4K8ac_peak_13141 | 4.44923  |                                                        |
| 17 | 60215750 | 60216069 | KD2-H4K8ac_peak_13142 | 9.26402  |                                                        |
| 17 | 60500816 | 60501568 | KD2-H4K8ac_peak_13143 | 11.3923  | METTL2A_ENSG00000087995                                |
| 17 | 60547382 | 60547874 | KD2-H4K8ac_peak_13144 | 7.20567  |                                                        |
| 17 | 60555228 | 60555934 | KD2-H4K8ac_peak_13145 | 17.55491 |                                                        |
| 17 | 60556177 | 60557053 | KD2-H4K8ac_peak_13146 | 23.87808 |                                                        |
| 17 | 60704263 | 60705883 | KD2-H4K8ac_peak_13147 | 12.93862 | MRC2_ENSG00000011028                                   |
| 17 | 60706309 | 60706909 | KD2-H4K8ac_peak_13148 | 5.65324  |                                                        |
| 17 | 60721431 | 60722290 | KD2-H4K8ac_peak_13149 | 11.24702 |                                                        |
| 17 | 60729438 | 60731680 | KD2-H4K8ac_peak_13150 | 26.61491 |                                                        |
| 17 | 60771727 | 60771933 | KD2-H4K8ac_peak_13151 | 6.17833  |                                                        |
| 17 | 60780855 | 60781163 | KD2-H4K8ac_peak_13152 | 8.63033  |                                                        |
| 17 | 60781367 | 60782268 | KD2-H4K8ac_peak_13153 | 18.73301 |                                                        |
| 17 | 60783008 | 60783352 | KD2-H4K8ac_peak_13154 | 5.30799  |                                                        |

|    |          |          |                       |          |                                                             |
|----|----------|----------|-----------------------|----------|-------------------------------------------------------------|
| 17 | 60827438 | 60828392 | KD2-H4K8ac_peak_13155 | 11.00004 |                                                             |
| 17 | 60856245 | 60856657 | KD2-H4K8ac_peak_13156 | 4.06758  |                                                             |
| 17 | 60856965 | 60857264 | KD2-H4K8ac_peak_13157 | 4.42765  |                                                             |
| 17 | 60906072 | 60906324 | KD2-H4K8ac_peak_13158 | 8.36514  |                                                             |
| 17 | 60946705 | 60947041 | KD2-H4K8ac_peak_13159 | 6.99815  |                                                             |
| 17 | 60947960 | 60948192 | KD2-H4K8ac_peak_13160 | 6.25869  |                                                             |
| 17 | 60970307 | 60970577 | KD2-H4K8ac_peak_13161 | 6.05809  |                                                             |
| 17 | 61000305 | 61000757 | KD2-H4K8ac_peak_13162 | 7.93362  |                                                             |
| 17 | 61001618 | 61002049 | KD2-H4K8ac_peak_13163 | 5.14125  |                                                             |
| 17 | 61004133 | 61004373 | KD2-H4K8ac_peak_13164 | 4.36736  |                                                             |
| 17 | 61042513 | 61043435 | KD2-H4K8ac_peak_13165 | 9.26408  | RP11-180P8.1_ENSG00000263931                                |
| 17 | 61504965 | 61505157 | KD2-H4K8ac_peak_13166 | 5.1685   |                                                             |
| 17 | 61505391 | 61505625 | KD2-H4K8ac_peak_13167 | 8.49556  |                                                             |
| 17 | 61506736 | 61506958 | KD2-H4K8ac_peak_13168 | 4.54006  |                                                             |
| 17 | 61508759 | 61509298 | KD2-H4K8ac_peak_13169 | 9.05131  | RP11-269G24.3_ENSG00000263644;RP11-269G24.4_ENSG00000265282 |
| 17 | 61509753 | 61510599 | KD2-H4K8ac_peak_13170 | 15.62033 | RP11-269G24.4_ENSG00000265282                               |
| 17 | 61510925 | 61512866 | KD2-H4K8ac_peak_13171 | 23.98831 |                                                             |
| 17 | 61515946 | 61516699 | KD2-H4K8ac_peak_13172 | 9.44322  |                                                             |
| 17 | 61517377 | 61520045 | KD2-H4K8ac_peak_13173 | 18.53991 |                                                             |
| 17 | 61520468 | 61520894 | KD2-H4K8ac_peak_13174 | 15.48103 |                                                             |
| 17 | 61521094 | 61522729 | KD2-H4K8ac_peak_13175 | 17.61538 |                                                             |
| 17 | 61522961 | 61525612 | KD2-H4K8ac_peak_13176 | 35.30524 | CYB561_ENSG00000008283                                      |
| 17 | 61528112 | 61528315 | KD2-H4K8ac_peak_13177 | 6.84261  |                                                             |
| 17 | 61533021 | 61534082 | KD2-H4K8ac_peak_13178 | 10.43145 | RP11-269G24.6_ENSG00000265971                               |
| 17 | 61552519 | 61552961 | KD2-H4K8ac_peak_13179 | 5.9696   |                                                             |
| 17 | 61553762 | 61554539 | KD2-H4K8ac_peak_13180 | 22.68518 | ACE_ENSG00000159640                                         |
| 17 | 61554879 | 61555427 | KD2-H4K8ac_peak_13181 | 17.32967 | ACE_ENSG00000159640                                         |
| 17 | 61627004 | 61627454 | KD2-H4K8ac_peak_13182 | 12.53675 | DCAF7_ENSG00000136485                                       |
| 17 | 61627950 | 61628495 | KD2-H4K8ac_peak_13183 | 11.7608  | DCAF7_ENSG00000136485                                       |
| 17 | 61677729 | 61678673 | KD2-H4K8ac_peak_13184 | 29.49632 | TACO1_ENSG00000136463                                       |
| 17 | 61698889 | 61699281 | KD2-H4K8ac_peak_13185 | 11.05155 | MAP3K3_ENSG00000198909                                      |
| 17 | 61752840 | 61753154 | KD2-H4K8ac_peak_13186 | 3.86308  |                                                             |
| 17 | 61776447 | 61777418 | KD2-H4K8ac_peak_13187 | 8.36432  |                                                             |
| 17 | 61777646 | 61778482 | KD2-H4K8ac_peak_13188 | 24.97616 | LIMD2_ENSG00000136490                                       |
| 17 | 61797686 | 61797959 | KD2-H4K8ac_peak_13189 | 6.30626  |                                                             |
| 17 | 61818879 | 61819109 | KD2-H4K8ac_peak_13190 | 8.18084  | STRADA_ENSG00000266173                                      |
| 17 | 61819561 | 61820165 | KD2-H4K8ac_peak_13191 | 10.53377 | STRADA_ENSG00000266173                                      |
| 17 | 61851261 | 61851505 | KD2-H4K8ac_peak_13192 | 14.80472 | DDX42_ENSG00000198231                                       |
| 17 | 61851706 | 61852060 | KD2-H4K8ac_peak_13193 | 16.49944 | DDX42_ENSG00000198231                                       |
| 17 | 61903910 | 61904264 | KD2-H4K8ac_peak_13194 | 11.50346 | PSMC5_ENSG00000087191                                       |
| 17 | 61904567 | 61905293 | KD2-H4K8ac_peak_13195 | 20.18381 | PSMC5_ENSG00000087191                                       |
| 17 | 61917017 | 61917402 | KD2-H4K8ac_peak_13196 | 13.35993 | RN7SL805P_ENSG00000264756                                   |
| 17 | 61918400 | 61918688 | KD2-H4K8ac_peak_13197 | 6.66359  |                                                             |
| 17 | 61919166 | 61920146 | KD2-H4K8ac_peak_13198 | 21.46903 | SMARCD2_ENSG00000108604                                     |
| 17 | 61920668 | 61920942 | KD2-H4K8ac_peak_13199 | 10.19949 | SMARCD2_ENSG00000108604                                     |
| 17 | 62075114 | 62075884 | KD2-H4K8ac_peak_13200 | 7.76104  | C17orf72_ENSG00000224383                                    |

|    |          |          |                       |          |                                                       |
|----|----------|----------|-----------------------|----------|-------------------------------------------------------|
| 17 | 62076259 | 62076588 | KD2-H4K8ac_peak_13201 | 4.50891  | RP11-214C8.2_ENSG00000264954;C17orf72_ENSG00000224383 |
| 17 | 62082763 | 62083530 | KD2-H4K8ac_peak_13202 | 8.6475   |                                                       |
| 17 | 62083989 | 62084299 | KD2-H4K8ac_peak_13203 | 8.5092   |                                                       |
| 17 | 62206919 | 62207452 | KD2-H4K8ac_peak_13204 | 9.36516  | ERN1_ENSG00000178607                                  |
| 17 | 62207761 | 62208095 | KD2-H4K8ac_peak_13205 | 7.76329  | ERN1_ENSG00000178607                                  |
| 17 | 62223439 | 62223858 | KD2-H4K8ac_peak_13206 | 5.75757  | SNORA76_ENSG00000266402;SNORD104_ENSG00000199753      |
| 17 | 62267820 | 62268075 | KD2-H4K8ac_peak_13207 | 6.67092  |                                                       |
| 17 | 62317693 | 62317985 | KD2-H4K8ac_peak_13208 | 5.54647  |                                                       |
| 17 | 62340815 | 62341296 | KD2-H4K8ac_peak_13209 | 10.7186  | TEX2_ENSG00000136478                                  |
| 17 | 62492707 | 62493154 | KD2-H4K8ac_peak_13210 | 8.4716   | POLG2_ENSG00000256525                                 |
| 17 | 62501675 | 62501902 | KD2-H4K8ac_peak_13211 | 16.54484 | CEP95_ENSG00000258890                                 |
| 17 | 62502828 | 62503374 | KD2-H4K8ac_peak_13212 | 14.63726 | CEP95_ENSG00000258890;DDX5_ENSG00000108654            |
| 17 | 62657675 | 62658400 | KD2-H4K8ac_peak_13213 | 21.12734 | SMURF2_ENSG00000108854                                |
| 17 | 62658595 | 62658912 | KD2-H4K8ac_peak_13214 | 8.3261   | SMURF2_ENSG00000108854                                |
| 17 | 62703441 | 62703868 | KD2-H4K8ac_peak_13215 | 4.37809  |                                                       |
| 17 | 62772204 | 62772946 | KD2-H4K8ac_peak_13216 | 9.57101  |                                                       |
| 17 | 62832746 | 62833232 | KD2-H4K8ac_peak_13217 | 8.58725  | PLEKHM1P_ENSG00000214176                              |
| 17 | 62833446 | 62834432 | KD2-H4K8ac_peak_13218 | 11.90231 | PLEKHM1P_ENSG00000214176                              |
| 17 | 62834737 | 62834996 | KD2-H4K8ac_peak_13219 | 6.75424  |                                                       |
| 17 | 62900325 | 62900541 | KD2-H4K8ac_peak_13220 | 7.47462  |                                                       |
| 17 | 62914914 | 62916516 | KD2-H4K8ac_peak_13221 | 19.80635 | LRRC37A3_ENSG00000176809                              |
| 17 | 62961927 | 62962398 | KD2-H4K8ac_peak_13222 | 17.70889 |                                                       |
| 17 | 62971025 | 62971575 | KD2-H4K8ac_peak_13223 | 16.14659 | AMZ2P1_ENSG00000214174                                |
| 17 | 62971871 | 62972674 | KD2-H4K8ac_peak_13224 | 8.5251   | AMZ2P1_ENSG00000214174                                |
| 17 | 62981860 | 62982058 | KD2-H4K8ac_peak_13225 | 8.80225  |                                                       |
| 17 | 63052011 | 63052283 | KD2-H4K8ac_peak_13226 | 7.59183  | GNA13_ENSG00000120063                                 |
| 17 | 63052488 | 63053632 | KD2-H4K8ac_peak_13227 | 20.5911  | GNA13_ENSG00000120063                                 |
| 17 | 63096172 | 63096687 | KD2-H4K8ac_peak_13228 | 5.38581  | RP11-160O5.1_ENSG00000263470                          |
| 17 | 63097007 | 63097331 | KD2-H4K8ac_peak_13229 | 7.76104  | RP11-160O5.1_ENSG00000263470                          |
| 17 | 63118891 | 63119448 | KD2-H4K8ac_peak_13230 | 6.25869  |                                                       |
| 17 | 63119660 | 63120091 | KD2-H4K8ac_peak_13231 | 7.40314  |                                                       |
| 17 | 63169688 | 63170320 | KD2-H4K8ac_peak_13232 | 7.36799  |                                                       |
| 17 | 63175912 | 63176359 | KD2-H4K8ac_peak_13233 | 6.84261  |                                                       |
| 17 | 63224379 | 63224573 | KD2-H4K8ac_peak_13234 | 6.36375  |                                                       |
| 17 | 63527490 | 63527885 | KD2-H4K8ac_peak_13235 | 8.21852  |                                                       |
| 17 | 63556691 | 63557057 | KD2-H4K8ac_peak_13236 | 14.74638 | AXIN2_ENSG00000168646                                 |
| 17 | 64187727 | 64188586 | KD2-H4K8ac_peak_13237 | 13.13969 | CEP112_ENSG00000154240                                |
| 17 | 64297984 | 64298343 | KD2-H4K8ac_peak_13238 | 11.52628 | PRKCA_ENSG00000154229                                 |
| 17 | 64321677 | 64322168 | KD2-H4K8ac_peak_13239 | 4.67342  |                                                       |
| 17 | 64346387 | 64346630 | KD2-H4K8ac_peak_13240 | 5.71781  |                                                       |
| 17 | 64361390 | 64361595 | KD2-H4K8ac_peak_13241 | 6.93012  |                                                       |
| 17 | 64363365 | 64363599 | KD2-H4K8ac_peak_13242 | 8.26129  |                                                       |
| 17 | 64369987 | 64371093 | KD2-H4K8ac_peak_13243 | 21.12734 |                                                       |
| 17 | 64379845 | 64380055 | KD2-H4K8ac_peak_13244 | 8.51832  |                                                       |
| 17 | 64393865 | 64394117 | KD2-H4K8ac_peak_13245 | 14.60723 |                                                       |
| 17 | 64411875 | 64412101 | KD2-H4K8ac_peak_13246 | 4.211    | RP11-4F22.2_ENSG00000264630                           |

|    |          |          |                       |          |                                                   |
|----|----------|----------|-----------------------|----------|---------------------------------------------------|
| 17 | 64429603 | 64430173 | KD2-H4K8ac_peak_13247 | 10.77651 |                                                   |
| 17 | 64659025 | 64659532 | KD2-H4K8ac_peak_13248 | 11.05467 |                                                   |
| 17 | 64724375 | 64724629 | KD2-H4K8ac_peak_13249 | 4.70206  |                                                   |
| 17 | 64760245 | 64760538 | KD2-H4K8ac_peak_13250 | 4.98072  |                                                   |
| 17 | 64761063 | 64761398 | KD2-H4K8ac_peak_13251 | 6.66692  |                                                   |
| 17 | 64771414 | 64771875 | KD2-H4K8ac_peak_13252 | 6.65673  |                                                   |
| 17 | 64830927 | 64831567 | KD2-H4K8ac_peak_13253 | 17.42905 | CACNG5_ENSG00000075429                            |
| 17 | 64901042 | 64901567 | KD2-H4K8ac_peak_13254 | 8.55271  |                                                   |
| 17 | 64902594 | 64902910 | KD2-H4K8ac_peak_13255 | 10.6665  |                                                   |
| 17 | 64948960 | 64949720 | KD2-H4K8ac_peak_13256 | 8.86099  |                                                   |
| 17 | 64950058 | 64950382 | KD2-H4K8ac_peak_13257 | 5.54647  |                                                   |
| 17 | 64960048 | 64961577 | KD2-H4K8ac_peak_13258 | 18.73205 | CACNG4_ENSG00000075461                            |
| 17 | 64962134 | 64962797 | KD2-H4K8ac_peak_13259 | 8.85813  |                                                   |
| 17 | 64963351 | 64963756 | KD2-H4K8ac_peak_13260 | 9.26287  |                                                   |
| 17 | 64963979 | 64964444 | KD2-H4K8ac_peak_13261 | 5.85291  |                                                   |
| 17 | 64965171 | 64965602 | KD2-H4K8ac_peak_13262 | 12.30509 |                                                   |
| 17 | 64967175 | 64967888 | KD2-H4K8ac_peak_13263 | 12.48406 |                                                   |
| 17 | 64968194 | 64969233 | KD2-H4K8ac_peak_13264 | 10.31523 |                                                   |
| 17 | 64969440 | 64969962 | KD2-H4K8ac_peak_13265 | 6.5969   |                                                   |
| 17 | 64970359 | 64970574 | KD2-H4K8ac_peak_13266 | 5.98692  |                                                   |
| 17 | 64971815 | 64972443 | KD2-H4K8ac_peak_13267 | 11.20059 |                                                   |
| 17 | 64972885 | 64973146 | KD2-H4K8ac_peak_13268 | 7.00136  |                                                   |
| 17 | 64973597 | 64974027 | KD2-H4K8ac_peak_13269 | 8.85813  |                                                   |
| 17 | 64974292 | 64975452 | KD2-H4K8ac_peak_13270 | 15.50901 |                                                   |
| 17 | 64982096 | 64982863 | KD2-H4K8ac_peak_13271 | 10.35678 |                                                   |
| 17 | 64983650 | 64984124 | KD2-H4K8ac_peak_13272 | 7.50083  |                                                   |
| 17 | 64984344 | 64985067 | KD2-H4K8ac_peak_13273 | 12.65012 |                                                   |
| 17 | 64987090 | 64987606 | KD2-H4K8ac_peak_13274 | 5.6644   |                                                   |
| 17 | 65013241 | 65013505 | KD2-H4K8ac_peak_13275 | 4.44527  |                                                   |
| 17 | 65013747 | 65016495 | KD2-H4K8ac_peak_13276 | 21.04966 |                                                   |
| 17 | 65017082 | 65017946 | KD2-H4K8ac_peak_13277 | 8.80432  | RP11-349A8.3_ENSG00000264491                      |
| 17 | 65018312 | 65018837 | KD2-H4K8ac_peak_13278 | 6.48713  | RP11-349A8.3_ENSG00000264491                      |
| 17 | 65023230 | 65023564 | KD2-H4K8ac_peak_13279 | 6.11999  |                                                   |
| 17 | 65115303 | 65115578 | KD2-H4K8ac_peak_13280 | 5.60968  |                                                   |
| 17 | 65118322 | 65118738 | KD2-H4K8ac_peak_13281 | 7.76104  |                                                   |
| 17 | 65120523 | 65120720 | KD2-H4K8ac_peak_13282 | 4.01115  |                                                   |
| 17 | 65121876 | 65122344 | KD2-H4K8ac_peak_13283 | 10.87093 |                                                   |
| 17 | 65122714 | 65122929 | KD2-H4K8ac_peak_13284 | 6.90231  |                                                   |
| 17 | 65123764 | 65124153 | KD2-H4K8ac_peak_13285 | 8.55271  |                                                   |
| 17 | 65241092 | 65242553 | KD2-H4K8ac_peak_13286 | 9.01262  | HELZ_ENSG00000198265;RP11-401F2.3_ENSG00000266473 |
| 17 | 65242853 | 65243169 | KD2-H4K8ac_peak_13287 | 5.3608   | HELZ_ENSG00000198265                              |
| 17 | 65317812 | 65318374 | KD2-H4K8ac_peak_13288 | 10.16028 |                                                   |
| 17 | 65362291 | 65362692 | KD2-H4K8ac_peak_13289 | 14.43794 | PSMD12_ENSG00000197170                            |
| 17 | 65362926 | 65363548 | KD2-H4K8ac_peak_13290 | 10.0997  | PSMD12_ENSG00000197170                            |
| 17 | 65373063 | 65374931 | KD2-H4K8ac_peak_13291 | 15.84211 | PITPNC1_ENSG00000154217                           |
| 17 | 65439230 | 65439542 | KD2-H4K8ac_peak_13292 | 4.84206  |                                                   |

|    |          |          |                       |          |                                                      |
|----|----------|----------|-----------------------|----------|------------------------------------------------------|
| 17 | 65440746 | 65441033 | KD2-H4K8ac_peak_13293 | 5.01002  |                                                      |
| 17 | 65525049 | 65525242 | KD2-H4K8ac_peak_13294 | 10.29842 |                                                      |
| 17 | 65600497 | 65601452 | KD2-H4K8ac_peak_13295 | 12.17278 |                                                      |
| 17 | 65603174 | 65604078 | KD2-H4K8ac_peak_13296 | 7.9042   |                                                      |
| 17 | 65604488 | 65604721 | KD2-H4K8ac_peak_13297 | 5.18937  |                                                      |
| 17 | 65712922 | 65713186 | KD2-H4K8ac_peak_13298 | 6.69844  | NOL11_ENSG00000130935                                |
| 17 | 65713396 | 65713677 | KD2-H4K8ac_peak_13299 | 9.96798  | NOL11_ENSG00000130935                                |
| 17 | 65714099 | 65714440 | KD2-H4K8ac_peak_13300 | 9.20193  | NOL11_ENSG00000130935                                |
| 17 | 65775254 | 65775580 | KD2-H4K8ac_peak_13301 | 17.51891 |                                                      |
| 17 | 65821219 | 65821421 | KD2-H4K8ac_peak_13302 | 8.58725  | BPTF_ENSG00000171634                                 |
| 17 | 65821847 | 65822498 | KD2-H4K8ac_peak_13303 | 13.59098 | BPTF_ENSG00000171634                                 |
| 17 | 65988887 | 65989674 | KD2-H4K8ac_peak_13304 | 15.61313 | C17orf58_ENSG00000186665                             |
| 17 | 65989969 | 65990495 | KD2-H4K8ac_peak_13305 | 14.99434 | C17orf58_ENSG00000186665                             |
| 17 | 66016241 | 66016701 | KD2-H4K8ac_peak_13306 | 17.42905 |                                                      |
| 17 | 66031899 | 66032291 | KD2-H4K8ac_peak_13307 | 9.67696  | KPNA2_ENSG00000182481                                |
| 17 | 66097271 | 66097629 | KD2-H4K8ac_peak_13308 | 8.88428  | AC145343.2_ENSG00000265055;LINC00674_ENSG00000237854 |
| 17 | 66097861 | 66098224 | KD2-H4K8ac_peak_13309 | 10.09705 | AC145343.2_ENSG00000265055;LINC00674_ENSG00000237854 |
| 17 | 66201283 | 66202387 | KD2-H4K8ac_peak_13310 | 27.10442 |                                                      |
| 17 | 66243579 | 66243953 | KD2-H4K8ac_peak_13311 | 12.48406 | RP11-147L13.2_ENSG00000265100;AMZ2_ENSG00000196704   |
| 17 | 66244235 | 66244564 | KD2-H4K8ac_peak_13312 | 19.24845 | RP11-147L13.2_ENSG00000265100;AMZ2_ENSG00000196704   |
| 17 | 66287640 | 66288366 | KD2-H4K8ac_peak_13313 | 7.07117  | SLC16A6_ENSG00000108932                              |
| 17 | 66507567 | 66508366 | KD2-H4K8ac_peak_13314 | 9.048    | PRKAR1A_ENSG00000108946                              |
| 17 | 66508578 | 66509220 | KD2-H4K8ac_peak_13315 | 10.84707 | PRKAR1A_ENSG00000108946                              |
| 17 | 67322803 | 67323237 | KD2-H4K8ac_peak_13316 | 8.23274  | ABCA5_ENSG00000154265                                |
| 17 | 67323444 | 67323837 | KD2-H4K8ac_peak_13317 | 17.53289 | ABCA5_ENSG00000154265                                |
| 17 | 67410250 | 67411048 | KD2-H4K8ac_peak_13318 | 15.40891 | MAP2K6_ENSG00000108984                               |
| 17 | 67447717 | 67447975 | KD2-H4K8ac_peak_13319 | 6.05809  |                                                      |
| 17 | 68165082 | 68165335 | KD2-H4K8ac_peak_13320 | 8.58725  | KCNJ2-AS1_ENSG00000267365;KCNJ2_ENSG00000123700      |
| 17 | 68266651 | 68266914 | KD2-H4K8ac_peak_13321 | 6.24747  |                                                      |
| 17 | 69159836 | 69160102 | KD2-H4K8ac_peak_13322 | 6.9809   |                                                      |
| 17 | 69161146 | 69161339 | KD2-H4K8ac_peak_13323 | 7.44366  |                                                      |
| 17 | 69177010 | 69177209 | KD2-H4K8ac_peak_13324 | 5.57044  |                                                      |
| 17 | 69282860 | 69283105 | KD2-H4K8ac_peak_13325 | 8.17902  |                                                      |
| 17 | 69434987 | 69435247 | KD2-H4K8ac_peak_13326 | 7.75499  |                                                      |
| 17 | 69867438 | 69867789 | KD2-H4K8ac_peak_13327 | 5.20908  |                                                      |
| 17 | 69972405 | 69972614 | KD2-H4K8ac_peak_13328 | 6.39197  |                                                      |
| 17 | 70028611 | 70028902 | KD2-H4K8ac_peak_13329 | 5.20998  |                                                      |
| 17 | 70116245 | 70116439 | KD2-H4K8ac_peak_13330 | 6.69354  | SOX9_ENSG00000125398                                 |
| 17 | 70123037 | 70123682 | KD2-H4K8ac_peak_13331 | 7.10552  |                                                      |
| 17 | 70216315 | 70216718 | KD2-H4K8ac_peak_13332 | 8.02571  |                                                      |
| 17 | 70345453 | 70345746 | KD2-H4K8ac_peak_13333 | 7.76329  |                                                      |
| 17 | 70346102 | 70346351 | KD2-H4K8ac_peak_13334 | 6.40297  |                                                      |
| 17 | 70359745 | 70359946 | KD2-H4K8ac_peak_13335 | 6.36375  |                                                      |
| 17 | 70373272 | 70373678 | KD2-H4K8ac_peak_13336 | 13.12288 |                                                      |
| 17 | 70374201 | 70374436 | KD2-H4K8ac_peak_13337 | 8.86099  |                                                      |
| 17 | 70374832 | 70375240 | KD2-H4K8ac_peak_13338 | 8.85813  |                                                      |

|    |          |          |                       |          |                          |
|----|----------|----------|-----------------------|----------|--------------------------|
| 17 | 70375550 | 70375850 | KD2-H4K8ac_peak_13339 | 4.37809  |                          |
| 17 | 70377075 | 70377363 | KD2-H4K8ac_peak_13340 | 5.30799  |                          |
| 17 | 70378237 | 70378465 | KD2-H4K8ac_peak_13341 | 6.30607  |                          |
| 17 | 70403008 | 70403265 | KD2-H4K8ac_peak_13342 | 6.13909  |                          |
| 17 | 70419169 | 70419670 | KD2-H4K8ac_peak_13343 | 9.34989  |                          |
| 17 | 70564175 | 70564471 | KD2-H4K8ac_peak_13344 | 4.68059  |                          |
| 17 | 70588641 | 70588870 | KD2-H4K8ac_peak_13345 | 4.54006  |                          |
| 17 | 70589125 | 70589423 | KD2-H4K8ac_peak_13346 | 8.28234  |                          |
| 17 | 70774229 | 70774481 | KD2-H4K8ac_peak_13347 | 6.53538  |                          |
| 17 | 71007430 | 71007646 | KD2-H4K8ac_peak_13348 | 4.86324  |                          |
| 17 | 71045327 | 71045530 | KD2-H4K8ac_peak_13349 | 7.40111  |                          |
| 17 | 71088679 | 71089375 | KD2-H4K8ac_peak_13350 | 11.90231 | SLC39A11_ENSG00000133195 |
| 17 | 71114436 | 71114946 | KD2-H4K8ac_peak_13351 | 8.26129  |                          |
| 17 | 71115985 | 71116204 | KD2-H4K8ac_peak_13352 | 7.12213  |                          |
| 17 | 71151218 | 71151412 | KD2-H4K8ac_peak_13353 | 6.62541  |                          |
| 17 | 71151714 | 71151971 | KD2-H4K8ac_peak_13354 | 13.73635 |                          |
| 17 | 71152212 | 71152478 | KD2-H4K8ac_peak_13355 | 10.29842 |                          |
| 17 | 71187960 | 71188211 | KD2-H4K8ac_peak_13356 | 8.56219  | COG1_ENSG00000166685     |
| 17 | 71188541 | 71188828 | KD2-H4K8ac_peak_13357 | 14.43794 | COG1_ENSG00000166685     |
| 17 | 71189226 | 71189675 | KD2-H4K8ac_peak_13358 | 32.7515  | COG1_ENSG00000166685     |
| 17 | 71228017 | 71228372 | KD2-H4K8ac_peak_13359 | 8.85813  | C17orf80_ENSG00000141219 |
| 17 | 71228726 | 71229020 | KD2-H4K8ac_peak_13360 | 13.13969 | C17orf80_ENSG00000141219 |
| 17 | 71252084 | 71252310 | KD2-H4K8ac_peak_13361 | 4.44527  |                          |
| 17 | 71281406 | 71281883 | KD2-H4K8ac_peak_13362 | 7.70543  |                          |
| 17 | 71305831 | 71306698 | KD2-H4K8ac_peak_13363 | 8.84009  |                          |
| 17 | 71306972 | 71307294 | KD2-H4K8ac_peak_13364 | 12.40345 |                          |
| 17 | 71307778 | 71307979 | KD2-H4K8ac_peak_13365 | 9.77335  | CDC42EP4_ENSG00000179604 |
| 17 | 71308361 | 71308677 | KD2-H4K8ac_peak_13366 | 13.3695  | CDC42EP4_ENSG00000179604 |
| 17 | 71331403 | 71331611 | KD2-H4K8ac_peak_13367 | 5.88845  |                          |
| 17 | 71332773 | 71332995 | KD2-H4K8ac_peak_13368 | 5.30799  |                          |
| 17 | 71333329 | 71333526 | KD2-H4K8ac_peak_13369 | 10.46874 |                          |
| 17 | 71337554 | 71338199 | KD2-H4K8ac_peak_13370 | 15.29724 |                          |
| 17 | 71338414 | 71339362 | KD2-H4K8ac_peak_13371 | 32.20234 |                          |
| 17 | 71339714 | 71340948 | KD2-H4K8ac_peak_13372 | 12.13241 |                          |
| 17 | 71343676 | 71343923 | KD2-H4K8ac_peak_13373 | 4.71835  |                          |
| 17 | 71344967 | 71345776 | KD2-H4K8ac_peak_13374 | 12.15474 |                          |
| 17 | 71352209 | 71353237 | KD2-H4K8ac_peak_13375 | 11.44756 |                          |
| 17 | 71353821 | 71354495 | KD2-H4K8ac_peak_13376 | 25.51536 |                          |
| 17 | 71354691 | 71355119 | KD2-H4K8ac_peak_13377 | 7.28628  |                          |
| 17 | 71355533 | 71356219 | KD2-H4K8ac_peak_13378 | 9.56945  |                          |
| 17 | 71357323 | 71357852 | KD2-H4K8ac_peak_13379 | 5.96384  |                          |
| 17 | 71361812 | 71362005 | KD2-H4K8ac_peak_13380 | 5.22256  |                          |
| 17 | 71362503 | 71362899 | KD2-H4K8ac_peak_13381 | 6.20038  |                          |
| 17 | 71365662 | 71366081 | KD2-H4K8ac_peak_13382 | 10.59979 |                          |
| 17 | 71477069 | 71477318 | KD2-H4K8ac_peak_13383 | 5.54647  |                          |
| 17 | 71485625 | 71485866 | KD2-H4K8ac_peak_13384 | 4.06758  |                          |

|    |          |          |                       |          |                                                                          |
|----|----------|----------|-----------------------|----------|--------------------------------------------------------------------------|
| 17 | 71487921 | 71488952 | KD2-H4K8ac_peak_13385 | 11.17159 |                                                                          |
| 17 | 71489827 | 71490068 | KD2-H4K8ac_peak_13386 | 7.57681  |                                                                          |
| 17 | 71529208 | 71529664 | KD2-H4K8ac_peak_13387 | 8.4716   |                                                                          |
| 17 | 71596073 | 71596299 | KD2-H4K8ac_peak_13388 | 3.85826  |                                                                          |
| 17 | 71609835 | 71610193 | KD2-H4K8ac_peak_13389 | 6.40297  |                                                                          |
| 17 | 71715313 | 71715809 | KD2-H4K8ac_peak_13390 | 8.95692  |                                                                          |
| 17 | 71766098 | 71766719 | KD2-H4K8ac_peak_13391 | 7.69287  |                                                                          |
| 17 | 71781714 | 71781953 | KD2-H4K8ac_peak_13392 | 6.1298   | AC125421.1_ENSG00000234721                                               |
| 17 | 71823773 | 71823991 | KD2-H4K8ac_peak_13393 | 6.67092  | LINC00469_ENSG00000177338                                                |
| 17 | 71948762 | 71949341 | KD2-H4K8ac_peak_13394 | 8.10216  |                                                                          |
| 17 | 72143014 | 72143252 | KD2-H4K8ac_peak_13395 | 12.25498 |                                                                          |
| 17 | 72143626 | 72143848 | KD2-H4K8ac_peak_13396 | 5.1628   |                                                                          |
| 17 | 72148775 | 72149071 | KD2-H4K8ac_peak_13397 | 5.13615  |                                                                          |
| 17 | 72149644 | 72150023 | KD2-H4K8ac_peak_13398 | 5.75757  | RP11-101O21.1_ENSG00000266357                                            |
| 17 | 72198815 | 72199051 | KD2-H4K8ac_peak_13399 | 7.07117  | RPL38_ENSG00000172809                                                    |
| 17 | 72199876 | 72200143 | KD2-H4K8ac_peak_13400 | 9.24683  | RPL38_ENSG00000172809                                                    |
| 17 | 72209728 | 72210110 | KD2-H4K8ac_peak_13401 | 5.49478  | CTD-2514K5.2_ENSG00000246731;TTYH2_ENSG00000141540                       |
| 17 | 72239078 | 72239862 | KD2-H4K8ac_peak_13402 | 8.4716   |                                                                          |
| 17 | 72240120 | 72240584 | KD2-H4K8ac_peak_13403 | 10.53377 |                                                                          |
| 17 | 72321893 | 72322238 | KD2-H4K8ac_peak_13404 | 5.66705  | KIF19_ENSG00000196169                                                    |
| 17 | 72357403 | 72357912 | KD2-H4K8ac_peak_13405 | 7.79741  | BTBD17_ENSG00000204347                                                   |
| 17 | 72364693 | 72365101 | KD2-H4K8ac_peak_13406 | 11.35142 |                                                                          |
| 17 | 72375846 | 72376136 | KD2-H4K8ac_peak_13407 | 8.4716   |                                                                          |
| 17 | 72449739 | 72450082 | KD2-H4K8ac_peak_13408 | 11.82518 |                                                                          |
| 17 | 72450474 | 72451051 | KD2-H4K8ac_peak_13409 | 6.14438  |                                                                          |
| 17 | 72453362 | 72453769 | KD2-H4K8ac_peak_13410 | 9.95119  |                                                                          |
| 17 | 72628322 | 72628902 | KD2-H4K8ac_peak_13411 | 9.34989  |                                                                          |
| 17 | 72741096 | 72741347 | KD2-H4K8ac_peak_13412 | 7.49599  |                                                                          |
| 17 | 72744086 | 72744531 | KD2-H4K8ac_peak_13413 | 12.70959 | MIR3615_ENSG00000266036;MIR3615_ENSG00000264624;SLC9A3R1_ENSG00000109062 |
| 17 | 72745461 | 72745780 | KD2-H4K8ac_peak_13414 | 4.54006  | MIR3615_ENSG00000266036;MIR3615_ENSG00000264624;SLC9A3R1_ENSG00000109062 |
| 17 | 72753892 | 72754571 | KD2-H4K8ac_peak_13415 | 5.78173  |                                                                          |
| 17 | 72754879 | 72756881 | KD2-H4K8ac_peak_13416 | 16.54484 |                                                                          |
| 17 | 72757219 | 72757822 | KD2-H4K8ac_peak_13417 | 5.94405  |                                                                          |
| 17 | 72772068 | 72772399 | KD2-H4K8ac_peak_13418 | 13.02811 | NAT9_ENSG00000109065;TMEM104_ENSG00000109066                             |
| 17 | 72838538 | 72838837 | KD2-H4K8ac_peak_13419 | 15.17328 |                                                                          |
| 17 | 72868834 | 72869085 | KD2-H4K8ac_peak_13420 | 13.21979 | FDXR_ENSG00000161513                                                     |
| 17 | 72869652 | 72870126 | KD2-H4K8ac_peak_13421 | 13.31016 | FDXR_ENSG00000161513                                                     |
| 17 | 72870400 | 72870633 | KD2-H4K8ac_peak_13422 | 4.70206  |                                                                          |
| 17 | 72967807 | 72968231 | KD2-H4K8ac_peak_13423 | 11.3923  |                                                                          |
| 17 | 72968480 | 72968771 | KD2-H4K8ac_peak_13424 | 13.75159 | HID1_ENSG00000167861                                                     |
| 17 | 72977906 | 72978358 | KD2-H4K8ac_peak_13425 | 17.10757 |                                                                          |
| 17 | 72978590 | 72979041 | KD2-H4K8ac_peak_13426 | 11.7608  |                                                                          |
| 17 | 72983803 | 72984326 | KD2-H4K8ac_peak_13427 | 8.86099  | CDR2L_ENSG00000109089                                                    |
| 17 | 72986192 | 72986936 | KD2-H4K8ac_peak_13428 | 4.33139  |                                                                          |
| 17 | 73006409 | 73006634 | KD2-H4K8ac_peak_13429 | 5.01002  |                                                                          |
| 17 | 73006959 | 73007154 | KD2-H4K8ac_peak_13430 | 9.89383  |                                                                          |



|    |          |          |                       |          |                                                                   |
|----|----------|----------|-----------------------|----------|-------------------------------------------------------------------|
| 17 | 73008157 | 73009360 | KD2-H4K8ac_peak_13431 | 21.14153 | ICT1_ENSG00000167862                                              |
| 17 | 73030674 | 73031189 | KD2-H4K8ac_peak_13432 | 16.49944 |                                                                   |
| 17 | 73031462 | 73032740 | KD2-H4K8ac_peak_13433 | 15.57998 |                                                                   |
| 17 | 73042679 | 73042977 | KD2-H4K8ac_peak_13434 | 5.94405  | ATP5H_ENSG00000167863                                             |
| 17 | 73043425 | 73043879 | KD2-H4K8ac_peak_13435 | 21.60954 | ATP5H_ENSG00000167863                                             |
| 17 | 73087087 | 73087279 | KD2-H4K8ac_peak_13436 | 6.40297  |                                                                   |
| 17 | 73091100 | 73091319 | KD2-H4K8ac_peak_13437 | 5.54647  |                                                                   |
| 17 | 73105397 | 73106521 | KD2-H4K8ac_peak_13438 | 15.40241 | ARMC7_ENSG00000125449                                             |
| 17 | 73127208 | 73128550 | KD2-H4K8ac_peak_13439 | 20.26332 | NT5C_ENSG00000125458                                              |
| 17 | 73149214 | 73149633 | KD2-H4K8ac_peak_13440 | 9.96798  |                                                                   |
| 17 | 73149900 | 73150279 | KD2-H4K8ac_peak_13441 | 8.36432  |                                                                   |
| 17 | 73178453 | 73179048 | KD2-H4K8ac_peak_13442 | 34.12383 | SUMO2_ENSG00000188612                                             |
| 17 | 73179361 | 73179833 | KD2-H4K8ac_peak_13443 | 11.83301 | SUMO2_ENSG00000188612                                             |
| 17 | 73200820 | 73201354 | KD2-H4K8ac_peak_13444 | 10.43145 | NUP85_ENSG00000125450                                             |
| 17 | 73201605 | 73202168 | KD2-H4K8ac_peak_13445 | 8.48413  | NUP85_ENSG00000125450                                             |
| 17 | 73257253 | 73258519 | KD2-H4K8ac_peak_13446 | 14.71125 | GGA3_ENSG00000125447;MRPS7_ENSG00000125445                        |
| 17 | 73266101 | 73266418 | KD2-H4K8ac_peak_13447 | 5.94405  | MIF4GD_ENSG00000125457                                            |
| 17 | 73266750 | 73268843 | KD2-H4K8ac_peak_13448 | 26.38304 | MIF4GD_ENSG00000125457;RP11-649A18.12_ENSG00000263843             |
| 17 | 73269241 | 73269703 | KD2-H4K8ac_peak_13449 | 11.3923  |                                                                   |
| 17 | 73285804 | 73286129 | KD2-H4K8ac_peak_13450 | 8.58069  | SLC25A19_ENSG00000125454                                          |
| 17 | 73389467 | 73389774 | KD2-H4K8ac_peak_13451 | 9.76863  | RP11-16C1.1_ENSG00000265342                                       |
| 17 | 73452157 | 73452439 | KD2-H4K8ac_peak_13452 | 11.50346 |                                                                   |
| 17 | 73452775 | 73453504 | KD2-H4K8ac_peak_13453 | 25.68735 |                                                                   |
| 17 | 73511112 | 73511576 | KD2-H4K8ac_peak_13454 | 10.80014 | CASKIN2_ENSG00000177303;TSEN54_ENSG00000182173                    |
| 17 | 73521416 | 73521651 | KD2-H4K8ac_peak_13455 | 7.74292  |                                                                   |
| 17 | 73536261 | 73536495 | KD2-H4K8ac_peak_13456 | 4.27645  |                                                                   |
| 17 | 73553279 | 73554543 | KD2-H4K8ac_peak_13457 | 11.50346 |                                                                   |
| 17 | 73584545 | 73585286 | KD2-H4K8ac_peak_13458 | 31.95181 | MYO15B_ENSG00000266714                                            |
| 17 | 73585571 | 73586223 | KD2-H4K8ac_peak_13459 | 22.0091  |                                                                   |
| 17 | 73622348 | 73622740 | KD2-H4K8ac_peak_13460 | 5.30799  |                                                                   |
| 17 | 73662899 | 73663216 | KD2-H4K8ac_peak_13461 | 9.36665  | RECQL5_ENSG00000108469;SAP30BP_ENSG00000161526                    |
| 17 | 73663442 | 73663867 | KD2-H4K8ac_peak_13462 | 21.01814 | RECQL5_ENSG00000108469;SAP30BP_ENSG00000161526                    |
| 17 | 73690116 | 73690376 | KD2-H4K8ac_peak_13463 | 5.53033  |                                                                   |
| 17 | 73717160 | 73717402 | KD2-H4K8ac_peak_13464 | 7.27281  | ITGB4_ENSG00000132470                                             |
| 17 | 73745720 | 73746083 | KD2-H4K8ac_peak_13465 | 14.17488 |                                                                   |
| 17 | 73749255 | 73750516 | KD2-H4K8ac_peak_13466 | 15.74985 |                                                                   |
| 17 | 73760447 | 73761246 | KD2-H4K8ac_peak_13467 | 11.44887 | GALK1_ENSG00000108479                                             |
| 17 | 73761513 | 73761763 | KD2-H4K8ac_peak_13468 | 8.55271  | GALK1_ENSG00000108479                                             |
| 17 | 73775295 | 73775797 | KD2-H4K8ac_peak_13469 | 13.65567 |                                                                   |
| 17 | 73779232 | 73779461 | KD2-H4K8ac_peak_13470 | 6.74189  |                                                                   |
| 17 | 73780262 | 73780623 | KD2-H4K8ac_peak_13471 | 11.61757 | MIR4738_ENSG00000263565;UNK_ENSG00000132478                       |
| 17 | 73780845 | 73781931 | KD2-H4K8ac_peak_13472 | 23.17425 | H3F3B_ENSG00000132475;MIR4738_ENSG00000263565;UNK_ENSG00000132478 |
| 17 | 73822895 | 73825195 | KD2-H4K8ac_peak_13473 | 14.30822 |                                                                   |
| 17 | 73840496 | 73840715 | KD2-H4K8ac_peak_13474 | 4.37809  | UNC13D_ENSG00000092929                                            |
| 17 | 73851896 | 73852355 | KD2-H4K8ac_peak_13475 | 4.91674  | WBP2_ENSG00000132471                                              |
| 17 | 73865708 | 73866298 | KD2-H4K8ac_peak_13476 | 5.9696   |                                                                   |

|    |          |          |                       |          |                                                                      |
|----|----------|----------|-----------------------|----------|----------------------------------------------------------------------|
| 17 | 73892351 | 73893498 | KD2-H4K8ac_peak_13477 | 9.08072  | TRIM65_ENSG00000141569;RP11-552F3.10_ENSG00000267342                 |
| 17 | 73900427 | 73900789 | KD2-H4K8ac_peak_13478 | 18.80827 |                                                                      |
| 17 | 73901038 | 73901652 | KD2-H4K8ac_peak_13479 | 17.84477 |                                                                      |
| 17 | 73936836 | 73937094 | KD2-H4K8ac_peak_13480 | 15.76765 | FBF1_ENSG00000188878                                                 |
| 17 | 73974876 | 73975133 | KD2-H4K8ac_peak_13481 | 7.73264  | ACOX1_ENSG00000161533;TEN1_ENSG00000257949;TEN1-CDK3_ENSG00000261408 |
| 17 | 73975355 | 73976454 | KD2-H4K8ac_peak_13482 | 20.18381 | ACOX1_ENSG00000161533;TEN1_ENSG00000257949;TEN1-CDK3_ENSG00000261408 |
| 17 | 73996448 | 73997064 | KD2-H4K8ac_peak_13483 | 13.81781 | CDK3_ENSG00000250506                                                 |
| 17 | 74025919 | 74026320 | KD2-H4K8ac_peak_13484 | 4.85908  |                                                                      |
| 17 | 74068769 | 74069236 | KD2-H4K8ac_peak_13485 | 25.34026 | SRP68_ENSG00000167881;ZACN_ENSG00000186919                           |
| 17 | 74076068 | 74076448 | KD2-H4K8ac_peak_13486 | 5.54647  |                                                                      |
| 17 | 74099935 | 74100982 | KD2-H4K8ac_peak_13487 | 21.23512 |                                                                      |
| 17 | 74117465 | 74118245 | KD2-H4K8ac_peak_13488 | 10.05606 | EXOC7_ENSG00000182473                                                |
| 17 | 74235838 | 74236116 | KD2-H4K8ac_peak_13489 | 5.65324  | RNF157_ENSG00000141576                                               |
| 17 | 74236931 | 74237404 | KD2-H4K8ac_peak_13490 | 9.71513  | RNF157_ENSG00000141576                                               |
| 17 | 74256282 | 74256481 | KD2-H4K8ac_peak_13491 | 6.30229  |                                                                      |
| 17 | 74349100 | 74350262 | KD2-H4K8ac_peak_13492 | 18.79324 |                                                                      |
| 17 | 74350574 | 74351228 | KD2-H4K8ac_peak_13493 | 8.26129  |                                                                      |
| 17 | 74364118 | 74364647 | KD2-H4K8ac_peak_13494 | 4.54006  |                                                                      |
| 17 | 74370279 | 74370617 | KD2-H4K8ac_peak_13495 | 5.02584  |                                                                      |
| 17 | 74380044 | 74380627 | KD2-H4K8ac_peak_13496 | 6.8713   | PRPSAP1_ENSG00000161542                                              |
| 17 | 74382091 | 74382394 | KD2-H4K8ac_peak_13497 | 9.41619  |                                                                      |
| 17 | 74448730 | 74449269 | KD2-H4K8ac_peak_13498 | 30.32576 | UBE2O_ENSG00000175931;AANAT_ENSG00000129673                          |
| 17 | 74493621 | 74494234 | KD2-H4K8ac_peak_13499 | 9.26402  |                                                                      |
| 17 | 74497206 | 74497431 | KD2-H4K8ac_peak_13500 | 7.92775  | RHBDF2_ENSG00000129667                                               |
| 17 | 74497685 | 74498228 | KD2-H4K8ac_peak_13501 | 14.03283 | RHBDF2_ENSG00000129667                                               |
| 17 | 74502259 | 74503253 | KD2-H4K8ac_peak_13502 | 11.00372 |                                                                      |
| 17 | 74524467 | 74524667 | KD2-H4K8ac_peak_13503 | 5.26288  | PRCD_ENSG00000214140                                                 |
| 17 | 74525222 | 74525497 | KD2-H4K8ac_peak_13504 | 9.98869  |                                                                      |
| 17 | 74525871 | 74527994 | KD2-H4K8ac_peak_13505 | 9.26408  |                                                                      |
| 17 | 74532466 | 74532685 | KD2-H4K8ac_peak_13506 | 4.30033  |                                                                      |
| 17 | 74533204 | 74533645 | KD2-H4K8ac_peak_13507 | 7.44247  |                                                                      |
| 17 | 74533945 | 74534912 | KD2-H4K8ac_peak_13508 | 28.67307 |                                                                      |
| 17 | 74536435 | 74536917 | KD2-H4K8ac_peak_13509 | 17.90608 |                                                                      |
| 17 | 74537313 | 74537707 | KD2-H4K8ac_peak_13510 | 8.63879  |                                                                      |
| 17 | 74538640 | 74539923 | KD2-H4K8ac_peak_13511 | 21.12524 |                                                                      |
| 17 | 74540382 | 74541682 | KD2-H4K8ac_peak_13512 | 30.55453 |                                                                      |
| 17 | 74541883 | 74542665 | KD2-H4K8ac_peak_13513 | 8.58725  |                                                                      |
| 17 | 74543075 | 74543414 | KD2-H4K8ac_peak_13514 | 4.28151  |                                                                      |
| 17 | 74549833 | 74550122 | KD2-H4K8ac_peak_13515 | 6.27245  |                                                                      |
| 17 | 74550556 | 74550813 | KD2-H4K8ac_peak_13516 | 3.97079  |                                                                      |
| 17 | 74553127 | 74553647 | KD2-H4K8ac_peak_13517 | 9.56945  | RP11-666A8.8_ENSG00000267546;SNHG16_ENSG00000163597                  |
| 17 | 74667041 | 74667700 | KD2-H4K8ac_peak_13518 | 16.21671 | RP11-318A15.2_ENSG00000261335                                        |
| 17 | 74682369 | 74682600 | KD2-H4K8ac_peak_13519 | 5.19103  |                                                                      |
| 17 | 74683095 | 74683309 | KD2-H4K8ac_peak_13520 | 4.33139  |                                                                      |
| 17 | 74694097 | 74694363 | KD2-H4K8ac_peak_13521 | 9.81188  |                                                                      |
| 17 | 74696768 | 74697207 | KD2-H4K8ac_peak_13522 | 13.95627 |                                                                      |

|    |          |          |                       |          |                                                                              |
|----|----------|----------|-----------------------|----------|------------------------------------------------------------------------------|
| 17 | 74697596 | 74697915 | KD2-H4K8ac_peak_13523 | 7.81657  |                                                                              |
| 17 | 74705599 | 74706070 | KD2-H4K8ac_peak_13524 | 13.21979 |                                                                              |
| 17 | 74706356 | 74706653 | KD2-H4K8ac_peak_13525 | 5.9696   | MXRA7_ENSG00000182534                                                        |
| 17 | 74722220 | 74722452 | KD2-H4K8ac_peak_13526 | 7.92775  | JMJD6_ENSG00000070495;METTL23_ENSG00000181038                                |
| 17 | 74722967 | 74723452 | KD2-H4K8ac_peak_13527 | 12.85233 | JMJD6_ENSG00000070495;METTL23_ENSG00000181038                                |
| 17 | 74732631 | 74733371 | KD2-H4K8ac_peak_13528 | 17.09929 | SRSF2_ENSG00000161547;MFSDD11_ENSG00000092931;MIR636_ENSG00000207556         |
| 17 | 74733731 | 74733948 | KD2-H4K8ac_peak_13529 | 13.18326 | SRSF2_ENSG00000161547                                                        |
| 17 | 74769796 | 74770139 | KD2-H4K8ac_peak_13530 | 6.05809  |                                                                              |
| 17 | 74787557 | 74787919 | KD2-H4K8ac_peak_13531 | 13.58614 |                                                                              |
| 17 | 74816766 | 74817051 | KD2-H4K8ac_peak_13532 | 6.76298  |                                                                              |
| 17 | 74830574 | 74830807 | KD2-H4K8ac_peak_13533 | 7.49217  |                                                                              |
| 17 | 74836034 | 74836456 | KD2-H4K8ac_peak_13534 | 16.74555 |                                                                              |
| 17 | 74836691 | 74837116 | KD2-H4K8ac_peak_13535 | 6.84261  |                                                                              |
| 17 | 74837684 | 74838133 | KD2-H4K8ac_peak_13536 | 7.79068  |                                                                              |
| 17 | 74838465 | 74838777 | KD2-H4K8ac_peak_13537 | 5.01002  |                                                                              |
| 17 | 74839576 | 74841383 | KD2-H4K8ac_peak_13538 | 16.12602 |                                                                              |
| 17 | 74863958 | 74865245 | KD2-H4K8ac_peak_13539 | 8.58725  | MGAT5B_ENSG00000167889                                                       |
| 17 | 74964861 | 74965514 | KD2-H4K8ac_peak_13540 | 11.44887 | RP11-87G24.3_ENSG00000267568                                                 |
| 17 | 74966130 | 74966339 | KD2-H4K8ac_peak_13541 | 12.93007 | RP11-87G24.3_ENSG00000267568                                                 |
| 17 | 75052188 | 75052427 | KD2-H4K8ac_peak_13542 | 8.4716   |                                                                              |
| 17 | 75082795 | 75083004 | KD2-H4K8ac_peak_13543 | 12.79505 | LINC00338_ENSG00000234912;SEC14L1_ENSG00000129657;AC015815.3_ENSG00000203316 |
| 17 | 75083202 | 75083484 | KD2-H4K8ac_peak_13544 | 4.88306  | LINC00338_ENSG00000234912;SEC14L1_ENSG00000129657;AC015815.3_ENSG00000203316 |
| 17 | 75084112 | 75085208 | KD2-H4K8ac_peak_13545 | 26.49677 | AC015815.3_ENSG00000203316                                                   |
| 17 | 75136240 | 75136669 | KD2-H4K8ac_peak_13546 | 11.03172 |                                                                              |
| 17 | 75242852 | 75243602 | KD2-H4K8ac_peak_13547 | 14.18821 |                                                                              |
| 17 | 75251308 | 75251747 | KD2-H4K8ac_peak_13548 | 7.69287  |                                                                              |
| 17 | 75261564 | 75261785 | KD2-H4K8ac_peak_13549 | 6.13909  | RP11-285E9.5_ENSG00000265121                                                 |
| 17 | 75277016 | 75277272 | KD2-H4K8ac_peak_13550 | 10.29842 | RP11-285E9.6_ENSG00000263718;SEPT9_ENSG00000184640                           |
| 17 | 75277572 | 75277969 | KD2-H4K8ac_peak_13551 | 9.95119  | RP11-285E9.6_ENSG00000263718;SEPT9_ENSG00000184640                           |
| 17 | 75281787 | 75282450 | KD2-H4K8ac_peak_13552 | 5.59859  |                                                                              |
| 17 | 75282700 | 75283219 | KD2-H4K8ac_peak_13553 | 8.02118  |                                                                              |
| 17 | 75283545 | 75284630 | KD2-H4K8ac_peak_13554 | 14.80472 |                                                                              |
| 17 | 75301186 | 75301536 | KD2-H4K8ac_peak_13555 | 4.39858  |                                                                              |
| 17 | 75302371 | 75302675 | KD2-H4K8ac_peak_13556 | 3.97079  |                                                                              |
| 17 | 75303914 | 75305544 | KD2-H4K8ac_peak_13557 | 27.81685 |                                                                              |
| 17 | 75305926 | 75306617 | KD2-H4K8ac_peak_13558 | 5.75757  |                                                                              |
| 17 | 75306827 | 75307057 | KD2-H4K8ac_peak_13559 | 6.6792   |                                                                              |
| 17 | 75310692 | 75311014 | KD2-H4K8ac_peak_13560 | 11.52765 |                                                                              |
| 17 | 75311779 | 75312767 | KD2-H4K8ac_peak_13561 | 13.95627 |                                                                              |
| 17 | 75318662 | 75320086 | KD2-H4K8ac_peak_13562 | 9.44322  |                                                                              |
| 17 | 75327753 | 75328315 | KD2-H4K8ac_peak_13563 | 21.60954 |                                                                              |
| 17 | 75346982 | 75347189 | KD2-H4K8ac_peak_13564 | 6.99194  |                                                                              |
| 17 | 75347483 | 75348895 | KD2-H4K8ac_peak_13565 | 8.63033  |                                                                              |
| 17 | 75350521 | 75351034 | KD2-H4K8ac_peak_13566 | 7.76329  |                                                                              |
| 17 | 75351550 | 75351783 | KD2-H4K8ac_peak_13567 | 6.40297  |                                                                              |
| 17 | 75352845 | 75353119 | KD2-H4K8ac_peak_13568 | 11.3394  |                                                                              |

|    |          |          |                       |          |                               |
|----|----------|----------|-----------------------|----------|-------------------------------|
| 17 | 75358634 | 75359349 | KD2-H4K8ac_peak_13569 | 10.7186  |                               |
| 17 | 75359586 | 75359955 | KD2-H4K8ac_peak_13570 | 10.35678 |                               |
| 17 | 75360371 | 75361305 | KD2-H4K8ac_peak_13571 | 19.93398 |                               |
| 17 | 75361713 | 75362251 | KD2-H4K8ac_peak_13572 | 6.84261  |                               |
| 17 | 75362560 | 75362833 | KD2-H4K8ac_peak_13573 | 7.0754   |                               |
| 17 | 75363177 | 75363382 | KD2-H4K8ac_peak_13574 | 4.54006  |                               |
| 17 | 75368704 | 75369022 | KD2-H4K8ac_peak_13575 | 8.18476  |                               |
| 17 | 75369467 | 75370412 | KD2-H4K8ac_peak_13576 | 8.86099  |                               |
| 17 | 75371716 | 75372062 | KD2-H4K8ac_peak_13577 | 8.52921  |                               |
| 17 | 75372397 | 75373088 | KD2-H4K8ac_peak_13578 | 8.86099  | RP11-936I5.1_ENSG00000266998  |
| 17 | 75373899 | 75374379 | KD2-H4K8ac_peak_13579 | 10.54778 | RP11-936I5.1_ENSG00000266998  |
| 17 | 75383001 | 75383321 | KD2-H4K8ac_peak_13580 | 5.86865  |                               |
| 17 | 75384110 | 75384398 | KD2-H4K8ac_peak_13581 | 7.49599  |                               |
| 17 | 75385060 | 75386275 | KD2-H4K8ac_peak_13582 | 24.83142 |                               |
| 17 | 75415512 | 75415817 | KD2-H4K8ac_peak_13583 | 4.00527  |                               |
| 17 | 75416626 | 75416834 | KD2-H4K8ac_peak_13584 | 6.0605   |                               |
| 17 | 75417502 | 75417848 | KD2-H4K8ac_peak_13585 | 9.16767  |                               |
| 17 | 75419621 | 75419985 | KD2-H4K8ac_peak_13586 | 6.44479  |                               |
| 17 | 75420562 | 75421038 | KD2-H4K8ac_peak_13587 | 5.94405  |                               |
| 17 | 75421339 | 75421737 | KD2-H4K8ac_peak_13588 | 15.82743 |                               |
| 17 | 75422106 | 75422679 | KD2-H4K8ac_peak_13589 | 8.01338  |                               |
| 17 | 75425907 | 75426158 | KD2-H4K8ac_peak_13590 | 5.59859  |                               |
| 17 | 75426581 | 75427012 | KD2-H4K8ac_peak_13591 | 6.84261  |                               |
| 17 | 75428695 | 75429930 | KD2-H4K8ac_peak_13592 | 27.01413 |                               |
| 17 | 75430128 | 75430713 | KD2-H4K8ac_peak_13593 | 8.58725  |                               |
| 17 | 75431925 | 75432299 | KD2-H4K8ac_peak_13594 | 4.79789  |                               |
| 17 | 75432612 | 75432938 | KD2-H4K8ac_peak_13595 | 9.01262  |                               |
| 17 | 75433559 | 75434051 | KD2-H4K8ac_peak_13596 | 5.69399  |                               |
| 17 | 75436790 | 75437543 | KD2-H4K8ac_peak_13597 | 3.90565  | Y_RNA_ENSG00000200651         |
| 17 | 75447186 | 75447717 | KD2-H4K8ac_peak_13598 | 9.1511   |                               |
| 17 | 75471539 | 75471930 | KD2-H4K8ac_peak_13599 | 5.81222  |                               |
| 17 | 75475376 | 75476588 | KD2-H4K8ac_peak_13600 | 10.76532 |                               |
| 17 | 75524212 | 75525463 | KD2-H4K8ac_peak_13601 | 21.2844  |                               |
| 17 | 75568282 | 75568542 | KD2-H4K8ac_peak_13602 | 5.92591  |                               |
| 17 | 75686396 | 75686692 | KD2-H4K8ac_peak_13603 | 9.29151  |                               |
| 17 | 75686959 | 75687325 | KD2-H4K8ac_peak_13604 | 8.65175  |                               |
| 17 | 75687661 | 75687996 | KD2-H4K8ac_peak_13605 | 6.65673  |                               |
| 17 | 75693006 | 75693247 | KD2-H4K8ac_peak_13606 | 5.36437  |                               |
| 17 | 75695624 | 75696084 | KD2-H4K8ac_peak_13607 | 5.84991  |                               |
| 17 | 75696630 | 75696837 | KD2-H4K8ac_peak_13608 | 7.76104  |                               |
| 17 | 75720115 | 75720406 | KD2-H4K8ac_peak_13609 | 4.42765  |                               |
| 17 | 75722895 | 75723138 | KD2-H4K8ac_peak_13610 | 7.1181   |                               |
| 17 | 75723427 | 75723703 | KD2-H4K8ac_peak_13611 | 14.43206 | RP11-316M20.1_ENSG00000267790 |
| 17 | 75723971 | 75724171 | KD2-H4K8ac_peak_13612 | 6.16747  | RP11-316M20.1_ENSG00000267790 |
| 17 | 75724497 | 75724733 | KD2-H4K8ac_peak_13613 | 5.95537  | RP11-316M20.1_ENSG00000267790 |
| 17 | 75730254 | 75730641 | KD2-H4K8ac_peak_13614 | 8.88428  |                               |

|    |          |          |                       |          |                               |
|----|----------|----------|-----------------------|----------|-------------------------------|
| 17 | 75731093 | 75731834 | KD2-H4K8ac_peak_13615 | 20.18584 |                               |
| 17 | 75732244 | 75733046 | KD2-H4K8ac_peak_13616 | 6.40297  |                               |
| 17 | 75768865 | 75769292 | KD2-H4K8ac_peak_13617 | 7.47462  |                               |
| 17 | 75776910 | 75777146 | KD2-H4K8ac_peak_13618 | 7.92873  |                               |
| 17 | 75799514 | 75800038 | KD2-H4K8ac_peak_13619 | 6.0605   |                               |
| 17 | 75801145 | 75801348 | KD2-H4K8ac_peak_13620 | 6.41015  |                               |
| 17 | 75859917 | 75860557 | KD2-H4K8ac_peak_13621 | 9.95342  |                               |
| 17 | 75861612 | 75862050 | KD2-H4K8ac_peak_13622 | 5.59859  |                               |
| 17 | 75868548 | 75868780 | KD2-H4K8ac_peak_13623 | 4.211    |                               |
| 17 | 75870053 | 75870907 | KD2-H4K8ac_peak_13624 | 6.40297  |                               |
| 17 | 75876108 | 75876714 | KD2-H4K8ac_peak_13625 | 6.98244  |                               |
| 17 | 75877097 | 75877817 | KD2-H4K8ac_peak_13626 | 28.64145 | FLJ45079_ENSG00000204283      |
| 17 | 75878572 | 75879014 | KD2-H4K8ac_peak_13627 | 5.75757  | FLJ45079_ENSG00000204283      |
| 17 | 75879298 | 75879667 | KD2-H4K8ac_peak_13628 | 6.20982  | FLJ45079_ENSG00000204283      |
| 17 | 75880030 | 75880663 | KD2-H4K8ac_peak_13629 | 8.86099  |                               |
| 17 | 75911686 | 75911899 | KD2-H4K8ac_peak_13630 | 7.70289  |                               |
| 17 | 75919500 | 75919769 | KD2-H4K8ac_peak_13631 | 3.75035  |                               |
| 17 | 75923840 | 75924306 | KD2-H4K8ac_peak_13632 | 6.66692  |                               |
| 17 | 75926121 | 75926671 | KD2-H4K8ac_peak_13633 | 8.49564  |                               |
| 17 | 75927197 | 75927833 | KD2-H4K8ac_peak_13634 | 10.43145 |                               |
| 17 | 75954110 | 75954376 | KD2-H4K8ac_peak_13635 | 7.73264  |                               |
| 17 | 75954797 | 75955141 | KD2-H4K8ac_peak_13636 | 14.48922 |                               |
| 17 | 75955415 | 75955621 | KD2-H4K8ac_peak_13637 | 8.04448  |                               |
| 17 | 76035766 | 76035980 | KD2-H4K8ac_peak_13638 | 7.44324  |                               |
| 17 | 76036922 | 76037707 | KD2-H4K8ac_peak_13639 | 12.46522 |                               |
| 17 | 76113412 | 76114324 | KD2-H4K8ac_peak_13640 | 13.21045 |                               |
| 17 | 76121895 | 76122213 | KD2-H4K8ac_peak_13641 | 5.13615  |                               |
| 17 | 76124521 | 76124822 | KD2-H4K8ac_peak_13642 | 9.24683  |                               |
| 17 | 76140093 | 76140494 | KD2-H4K8ac_peak_13643 | 6.28228  |                               |
| 17 | 76141259 | 76141548 | KD2-H4K8ac_peak_13644 | 5.30799  | C17orf99_ENSG00000187997      |
| 17 | 76164078 | 76164524 | KD2-H4K8ac_peak_13645 | 5.19622  | SYNGR2_ENSG00000108639        |
| 17 | 76193928 | 76194135 | KD2-H4K8ac_peak_13646 | 5.48272  |                               |
| 17 | 76207466 | 76207704 | KD2-H4K8ac_peak_13647 | 6.22746  | RP11-219G17.6_ENSG00000267624 |
| 17 | 76209565 | 76210907 | KD2-H4K8ac_peak_13648 | 20.53952 | BIRC5_ENSG00000089685         |
| 17 | 76219614 | 76220132 | KD2-H4K8ac_peak_13649 | 10.09361 | AC087645.1_ENSG00000268310    |
| 17 | 76221226 | 76221874 | KD2-H4K8ac_peak_13650 | 7.36799  | AC087645.1_ENSG00000268310    |
| 17 | 76227257 | 76227964 | KD2-H4K8ac_peak_13651 | 11.92978 | TMEM235_ENSG00000204278       |
| 17 | 76228170 | 76228835 | KD2-H4K8ac_peak_13652 | 7.96136  | TMEM235_ENSG00000204278       |
| 17 | 76230415 | 76230917 | KD2-H4K8ac_peak_13653 | 10.77651 |                               |
| 17 | 76232360 | 76232746 | KD2-H4K8ac_peak_13654 | 9.63487  |                               |
| 17 | 76233167 | 76234521 | KD2-H4K8ac_peak_13655 | 13.02811 |                               |
| 17 | 76249951 | 76250629 | KD2-H4K8ac_peak_13656 | 26.03179 | THA1P_ENSG00000267676         |
| 17 | 76253104 | 76253351 | KD2-H4K8ac_peak_13657 | 4.06758  |                               |
| 17 | 76253682 | 76254786 | KD2-H4K8ac_peak_13658 | 22.7745  |                               |
| 17 | 76255118 | 76255423 | KD2-H4K8ac_peak_13659 | 5.64497  |                               |
| 17 | 76259269 | 76259806 | KD2-H4K8ac_peak_13660 | 6.65673  |                               |

|    |          |          |                       |          |                                                     |
|----|----------|----------|-----------------------|----------|-----------------------------------------------------|
| 17 | 76265716 | 76266082 | KD2-H4K8ac_peak_13661 | 8.01338  |                                                     |
| 17 | 76309832 | 76310599 | KD2-H4K8ac_peak_13662 | 11.92978 |                                                     |
| 17 | 76318886 | 76319222 | KD2-H4K8ac_peak_13663 | 4.67342  |                                                     |
| 17 | 76320525 | 76321148 | KD2-H4K8ac_peak_13664 | 7.36799  |                                                     |
| 17 | 76337556 | 76338584 | KD2-H4K8ac_peak_13665 | 13.95627 |                                                     |
| 17 | 76347526 | 76347984 | KD2-H4K8ac_peak_13666 | 9.08816  |                                                     |
| 17 | 76348626 | 76348898 | KD2-H4K8ac_peak_13667 | 9.6247   |                                                     |
| 17 | 76355394 | 76356198 | KD2-H4K8ac_peak_13668 | 8.58725  | SOCS3_ENSG00000184557;RP11-806H10.4_ENSG00000266970 |
| 17 | 76356583 | 76356926 | KD2-H4K8ac_peak_13669 | 17.43368 | SOCS3_ENSG00000184557;RP11-806H10.4_ENSG00000266970 |
| 17 | 76365662 | 76366079 | KD2-H4K8ac_peak_13670 | 7.44324  |                                                     |
| 17 | 76373986 | 76375145 | KD2-H4K8ac_peak_13671 | 10.09705 | PGS1_ENSG00000087157                                |
| 17 | 76495123 | 76495573 | KD2-H4K8ac_peak_13672 | 6.7498   | DNAH17-AS1_ENSG00000268470                          |
| 17 | 76584762 | 76585062 | KD2-H4K8ac_peak_13673 | 10.16972 |                                                     |
| 17 | 76587366 | 76587579 | KD2-H4K8ac_peak_13674 | 5.88845  |                                                     |
| 17 | 76588488 | 76589089 | KD2-H4K8ac_peak_13675 | 5.75757  |                                                     |
| 17 | 76703648 | 76704319 | KD2-H4K8ac_peak_13676 | 9.05772  |                                                     |
| 17 | 76711941 | 76712339 | KD2-H4K8ac_peak_13677 | 7.95563  |                                                     |
| 17 | 76713190 | 76713467 | KD2-H4K8ac_peak_13678 | 12.70959 |                                                     |
| 17 | 76713694 | 76714026 | KD2-H4K8ac_peak_13679 | 8.85813  |                                                     |
| 17 | 76778675 | 76779185 | KD2-H4K8ac_peak_13680 | 14.30077 | CYTH1_ENSG00000108669                               |
| 17 | 76837179 | 76837573 | KD2-H4K8ac_peak_13681 | 24.77129 | USP36_ENSG00000055483                               |
| 17 | 76871791 | 76871989 | KD2-H4K8ac_peak_13682 | 6.25869  |                                                     |
| 17 | 76878246 | 76878481 | KD2-H4K8ac_peak_13683 | 10.31695 |                                                     |
| 17 | 76878844 | 76880316 | KD2-H4K8ac_peak_13684 | 22.28045 |                                                     |
| 17 | 76880612 | 76881448 | KD2-H4K8ac_peak_13685 | 8.84009  |                                                     |
| 17 | 76887670 | 76888089 | KD2-H4K8ac_peak_13686 | 5.30799  |                                                     |
| 17 | 76910696 | 76910979 | KD2-H4K8ac_peak_13687 | 5.56864  |                                                     |
| 17 | 76912550 | 76912963 | KD2-H4K8ac_peak_13688 | 5.3157   |                                                     |
| 17 | 76921595 | 76921992 | KD2-H4K8ac_peak_13689 | 20.26332 | TIMP2_ENSG00000035862                               |
| 17 | 76922230 | 76922583 | KD2-H4K8ac_peak_13690 | 9.84999  | TIMP2_ENSG00000035862                               |
| 17 | 76928927 | 76930400 | KD2-H4K8ac_peak_13691 | 13.65567 |                                                     |
| 17 | 76930727 | 76932224 | KD2-H4K8ac_peak_13692 | 18.14508 |                                                     |
| 17 | 76932525 | 76932955 | KD2-H4K8ac_peak_13693 | 8.01475  |                                                     |
| 17 | 76975415 | 76976004 | KD2-H4K8ac_peak_13694 | 13.62458 | LGALS3BP_ENSG00000108679                            |
| 17 | 76976293 | 76977337 | KD2-H4K8ac_peak_13695 | 15.94391 | LGALS3BP_ENSG00000108679                            |
| 17 | 77005546 | 77006635 | KD2-H4K8ac_peak_13696 | 20.5798  | CANT1_ENSG00000171302                               |
| 17 | 77020184 | 77020842 | KD2-H4K8ac_peak_13697 | 6.40874  |                                                     |
| 17 | 77023292 | 77024111 | KD2-H4K8ac_peak_13698 | 12.13241 | C1QTNF1-AS1_ENSG00000265096                         |
| 17 | 77024657 | 77024922 | KD2-H4K8ac_peak_13699 | 5.40065  | C1QTNF1-AS1_ENSG00000265096                         |
| 17 | 77042376 | 77043155 | KD2-H4K8ac_peak_13700 | 9.03583  |                                                     |
| 17 | 77043426 | 77043706 | KD2-H4K8ac_peak_13701 | 4.86324  |                                                     |
| 17 | 77070365 | 77070600 | KD2-H4K8ac_peak_13702 | 6.30607  | ENGASE_ENSG00000167280                              |
| 17 | 77071061 | 77071264 | KD2-H4K8ac_peak_13703 | 5.26288  | ENGASE_ENSG00000167280                              |
| 17 | 77111227 | 77111562 | KD2-H4K8ac_peak_13704 | 3.86308  |                                                     |
| 17 | 77207746 | 77208187 | KD2-H4K8ac_peak_13705 | 6.16883  |                                                     |
| 17 | 77210597 | 77211780 | KD2-H4K8ac_peak_13706 | 15.93507 |                                                     |

|    |          |          |                       |          |                                                     |
|----|----------|----------|-----------------------|----------|-----------------------------------------------------|
| 17 | 77669810 | 77670168 | KD2-H4K8ac_peak_13707 | 8.10216  |                                                     |
| 17 | 77682174 | 77682504 | KD2-H4K8ac_peak_13708 | 6.05809  |                                                     |
| 17 | 77701524 | 77703414 | KD2-H4K8ac_peak_13709 | 22.92963 |                                                     |
| 17 | 77715479 | 77716394 | KD2-H4K8ac_peak_13710 | 11.05467 |                                                     |
| 17 | 77750975 | 77751722 | KD2-H4K8ac_peak_13711 | 17.42905 | CBX2_ENSG00000173894                                |
| 17 | 77752035 | 77752709 | KD2-H4K8ac_peak_13712 | 4.76255  | CBX2_ENSG00000173894                                |
| 17 | 77764790 | 77765195 | KD2-H4K8ac_peak_13713 | 6.84261  |                                                     |
| 17 | 77765406 | 77765722 | KD2-H4K8ac_peak_13714 | 9.63487  |                                                     |
| 17 | 77771633 | 77772320 | KD2-H4K8ac_peak_13715 | 24.02151 |                                                     |
| 17 | 77783302 | 77783957 | KD2-H4K8ac_peak_13716 | 17.42905 | AC100791.2_ENSG00000238331                          |
| 17 | 77784261 | 77784466 | KD2-H4K8ac_peak_13717 | 14.06194 | AC100791.2_ENSG00000238331                          |
| 17 | 77784892 | 77786036 | KD2-H4K8ac_peak_13718 | 23.7234  | AC100791.2_ENSG00000238331                          |
| 17 | 77786231 | 77788148 | KD2-H4K8ac_peak_13719 | 46.70645 |                                                     |
| 17 | 77805288 | 77806199 | KD2-H4K8ac_peak_13720 | 21.12734 |                                                     |
| 17 | 77813492 | 77813920 | KD2-H4K8ac_peak_13721 | 15.40367 | CBX4_ENSG00000141582                                |
| 17 | 77817131 | 77818363 | KD2-H4K8ac_peak_13722 | 19.25648 |                                                     |
| 17 | 77818852 | 77819096 | KD2-H4K8ac_peak_13723 | 5.85291  |                                                     |
| 17 | 77903944 | 77904567 | KD2-H4K8ac_peak_13724 | 15.82743 |                                                     |
| 17 | 77965778 | 77966124 | KD2-H4K8ac_peak_13725 | 15.86619 | CTD-2529O21.1_ENSG00000262172                       |
| 17 | 78009276 | 78009613 | KD2-H4K8ac_peak_13726 | 15.67427 | TBC1D16_ENSG00000167291;CCDC40_ENSG00000141519      |
| 17 | 78009834 | 78011033 | KD2-H4K8ac_peak_13727 | 15.81243 | TBC1D16_ENSG00000167291;CCDC40_ENSG00000141519      |
| 17 | 78056182 | 78056910 | KD2-H4K8ac_peak_13728 | 8.86099  |                                                     |
| 17 | 78070468 | 78071215 | KD2-H4K8ac_peak_13729 | 8.80432  |                                                     |
| 17 | 78073919 | 78074274 | KD2-H4K8ac_peak_13730 | 5.98282  |                                                     |
| 17 | 78074903 | 78076382 | KD2-H4K8ac_peak_13731 | 24.77129 | GAA_ENSG00000171298                                 |
| 17 | 78079484 | 78079679 | KD2-H4K8ac_peak_13732 | 5.92591  |                                                     |
| 17 | 78099844 | 78100085 | KD2-H4K8ac_peak_13733 | 6.92624  |                                                     |
| 17 | 78120446 | 78120810 | KD2-H4K8ac_peak_13734 | 11.28831 | EIF4A3_ENSG00000141543                              |
| 17 | 78121232 | 78121657 | KD2-H4K8ac_peak_13735 | 8.58725  | EIF4A3_ENSG00000141543                              |
| 17 | 78193625 | 78194563 | KD2-H4K8ac_peak_13736 | 14.83804 | SGSH_ENSG00000181523;SLC26A11_ENSG00000181045       |
| 17 | 78233631 | 78234276 | KD2-H4K8ac_peak_13737 | 17.42905 | RNF213_ENSG00000173821                              |
| 17 | 78234680 | 78235767 | KD2-H4K8ac_peak_13738 | 15.82743 | RNF213_ENSG00000173821                              |
| 17 | 78363995 | 78364416 | KD2-H4K8ac_peak_13739 | 6.25869  |                                                     |
| 17 | 78388675 | 78389518 | KD2-H4K8ac_peak_13740 | 14.73375 | CTD-2047H16.4_ENSG00000263069;ENDOV_ENSG00000173818 |
| 17 | 78427759 | 78428535 | KD2-H4K8ac_peak_13741 | 28.53052 | CTD-2526A2.2_ENSG00000260369                        |
| 17 | 78428756 | 78429330 | KD2-H4K8ac_peak_13742 | 14.85549 | CTD-2526A2.2_ENSG00000260369                        |
| 17 | 78505732 | 78506200 | KD2-H4K8ac_peak_13743 | 7.95563  |                                                     |
| 17 | 78517964 | 78518185 | KD2-H4K8ac_peak_13744 | 12.23    | RPTOR_ENSG00000141564                               |
| 17 | 78518733 | 78519458 | KD2-H4K8ac_peak_13745 | 11.3923  | RPTOR_ENSG00000141564                               |
| 17 | 78667501 | 78668029 | KD2-H4K8ac_peak_13746 | 8.21523  |                                                     |
| 17 | 78670366 | 78670594 | KD2-H4K8ac_peak_13747 | 3.97079  |                                                     |
| 17 | 78807488 | 78807711 | KD2-H4K8ac_peak_13748 | 8.16906  |                                                     |
| 17 | 78808335 | 78808591 | KD2-H4K8ac_peak_13749 | 6.67538  |                                                     |
| 17 | 78832202 | 78832428 | KD2-H4K8ac_peak_13750 | 5.1707   |                                                     |
| 17 | 78832758 | 78833177 | KD2-H4K8ac_peak_13751 | 17.09929 |                                                     |
| 17 | 78833408 | 78834479 | KD2-H4K8ac_peak_13752 | 14.43794 |                                                     |

|    |          |          |                       |          |                                                   |
|----|----------|----------|-----------------------|----------|---------------------------------------------------|
| 17 | 78835667 | 78836097 | KD2-H4K8ac_peak_13753 | 6.48713  |                                                   |
| 17 | 78932874 | 78933346 | KD2-H4K8ac_peak_13754 | 6.0605   |                                                   |
| 17 | 78965302 | 78966106 | KD2-H4K8ac_peak_13755 | 18.22876 | CHMP6_ENSG00000176108                             |
| 17 | 79008086 | 79008485 | KD2-H4K8ac_peak_13756 | 9.95119  | BAIAP2-AS1_ENSG00000226137;BAIAP2_ENSG00000175866 |
| 17 | 79009335 | 79009720 | KD2-H4K8ac_peak_13757 | 8.88082  | BAIAP2-AS1_ENSG00000226137;BAIAP2_ENSG00000175866 |
| 17 | 79031036 | 79031246 | KD2-H4K8ac_peak_13758 | 4.33139  |                                                   |
| 17 | 79041549 | 79041929 | KD2-H4K8ac_peak_13759 | 7.92775  |                                                   |
| 17 | 79048979 | 79049223 | KD2-H4K8ac_peak_13760 | 7.36799  |                                                   |
| 17 | 79049503 | 79049775 | KD2-H4K8ac_peak_13761 | 7.92775  |                                                   |
| 17 | 79050610 | 79051046 | KD2-H4K8ac_peak_13762 | 6.40297  |                                                   |
| 17 | 79056854 | 79057081 | KD2-H4K8ac_peak_13763 | 6.97919  |                                                   |
| 17 | 79071187 | 79071554 | KD2-H4K8ac_peak_13764 | 7.36799  |                                                   |
| 17 | 79088844 | 79089362 | KD2-H4K8ac_peak_13765 | 5.75757  |                                                   |
| 17 | 79116725 | 79117133 | KD2-H4K8ac_peak_13766 | 10.7186  |                                                   |
| 17 | 79138935 | 79139912 | KD2-H4K8ac_peak_13767 | 12.14337 | AATK_ENSG00000181409;AATK-AS1_ENSG00000225180     |
| 17 | 79140384 | 79140872 | KD2-H4K8ac_peak_13768 | 10.77651 | AATK_ENSG00000181409                              |
| 17 | 79196206 | 79196743 | KD2-H4K8ac_peak_13769 | 16.21436 | AZI1_ENSG00000141577                              |
| 17 | 79197148 | 79197517 | KD2-H4K8ac_peak_13770 | 20.30085 | AZI1_ENSG00000141577                              |
| 17 | 79212471 | 79212779 | KD2-H4K8ac_peak_13771 | 8.18084  | ENTHD2_ENSG00000167302;C17orf89_ENSG00000224877   |
| 17 | 79213187 | 79213993 | KD2-H4K8ac_peak_13772 | 19.28826 | ENTHD2_ENSG00000167302;C17orf89_ENSG00000224877   |
| 17 | 79218199 | 79218439 | KD2-H4K8ac_peak_13773 | 5.9696   |                                                   |
| 17 | 79226784 | 79227037 | KD2-H4K8ac_peak_13774 | 6.40297  |                                                   |
| 17 | 79268483 | 79269008 | KD2-H4K8ac_peak_13775 | 11.04256 | SLC38A10_ENSG00000157637                          |
| 17 | 79269234 | 79269685 | KD2-H4K8ac_peak_13776 | 15.50901 | SLC38A10_ENSG00000157637                          |
| 17 | 79276889 | 79277242 | KD2-H4K8ac_peak_13777 | 6.20982  |                                                   |
| 17 | 79282679 | 79284956 | KD2-H4K8ac_peak_13778 | 18.40451 | LINC00482_ENSG00000185168                         |
| 17 | 79285196 | 79286082 | KD2-H4K8ac_peak_13779 | 10.49196 |                                                   |
| 17 | 79287375 | 79289407 | KD2-H4K8ac_peak_13780 | 15.82743 |                                                   |
| 17 | 79290288 | 79290752 | KD2-H4K8ac_peak_13781 | 9.36908  |                                                   |
| 17 | 79291843 | 79292674 | KD2-H4K8ac_peak_13782 | 13.80019 |                                                   |
| 17 | 79295733 | 79296280 | KD2-H4K8ac_peak_13783 | 5.29282  |                                                   |
| 17 | 79296833 | 79297356 | KD2-H4K8ac_peak_13784 | 21.09086 |                                                   |
| 17 | 79297663 | 79298312 | KD2-H4K8ac_peak_13785 | 7.44247  |                                                   |
| 17 | 79301898 | 79304220 | KD2-H4K8ac_peak_13786 | 11.03172 | TMEM105_ENSG00000185332                           |
| 17 | 79304789 | 79305439 | KD2-H4K8ac_peak_13787 | 11.44979 | TMEM105_ENSG00000185332                           |
| 17 | 79305693 | 79306102 | KD2-H4K8ac_peak_13788 | 11.01051 |                                                   |
| 17 | 79310897 | 79311136 | KD2-H4K8ac_peak_13789 | 9.95119  |                                                   |
| 17 | 79311458 | 79312011 | KD2-H4K8ac_peak_13790 | 8.86099  |                                                   |
| 17 | 79312246 | 79312461 | KD2-H4K8ac_peak_13791 | 9.15555  |                                                   |
| 17 | 79313068 | 79313808 | KD2-H4K8ac_peak_13792 | 16.74606 |                                                   |
| 17 | 79314188 | 79314723 | KD2-H4K8ac_peak_13793 | 7.92775  |                                                   |
| 17 | 79315003 | 79315700 | KD2-H4K8ac_peak_13794 | 9.87655  |                                                   |
| 17 | 79316597 | 79317603 | KD2-H4K8ac_peak_13795 | 9.01262  |                                                   |
| 17 | 79317906 | 79319801 | KD2-H4K8ac_peak_13796 | 23.04547 |                                                   |
| 17 | 79320289 | 79320599 | KD2-H4K8ac_peak_13797 | 10.72313 |                                                   |
| 17 | 79367001 | 79367704 | KD2-H4K8ac_peak_13798 | 8.03676  |                                                   |



|    |          |          |                       |          |                                                                                                        |
|----|----------|----------|-----------------------|----------|--------------------------------------------------------------------------------------------------------|
| 17 | 79392820 | 79393487 | KD2-H4K8ac_peak_13799 | 14.34343 |                                                                                                        |
| 17 | 79393710 | 79394355 | KD2-H4K8ac_peak_13800 | 9.95759  |                                                                                                        |
| 17 | 79396608 | 79396918 | KD2-H4K8ac_peak_13801 | 6.99815  |                                                                                                        |
| 17 | 79403214 | 79403485 | KD2-H4K8ac_peak_13802 | 7.4599   |                                                                                                        |
| 17 | 79404461 | 79405162 | KD2-H4K8ac_peak_13803 | 18.31034 |                                                                                                        |
| 17 | 79424076 | 79424367 | KD2-H4K8ac_peak_13804 | 5.68393  |                                                                                                        |
| 17 | 79438253 | 79439397 | KD2-H4K8ac_peak_13805 | 12.57865 |                                                                                                        |
| 17 | 79439631 | 79440051 | KD2-H4K8ac_peak_13806 | 6.30607  |                                                                                                        |
| 17 | 79448165 | 79448400 | KD2-H4K8ac_peak_13807 | 7.11824  |                                                                                                        |
| 17 | 79448755 | 79449420 | KD2-H4K8ac_peak_13808 | 6.84261  |                                                                                                        |
| 17 | 79451038 | 79452286 | KD2-H4K8ac_peak_13809 | 14.73375 |                                                                                                        |
| 17 | 79454505 | 79455664 | KD2-H4K8ac_peak_13810 | 17.42905 |                                                                                                        |
| 17 | 79461789 | 79462106 | KD2-H4K8ac_peak_13811 | 8.79106  |                                                                                                        |
| 17 | 79479361 | 79479788 | KD2-H4K8ac_peak_13812 | 13.674   | RP13-766D20.1_ENSG00000229947                                                                          |
| 17 | 79479986 | 79480609 | KD2-H4K8ac_peak_13813 | 23.87808 | RP13-766D20.1_ENSG00000229947;RP13-766D20.2_ENSG00000229848                                            |
| 17 | 79481366 | 79481945 | KD2-H4K8ac_peak_13814 | 14.3323  | RP13-766D20.2_ENSG00000229848                                                                          |
| 17 | 79482182 | 79482393 | KD2-H4K8ac_peak_13815 | 12.30509 |                                                                                                        |
| 17 | 79482633 | 79482986 | KD2-H4K8ac_peak_13816 | 7.49599  |                                                                                                        |
| 17 | 79518781 | 79520017 | KD2-H4K8ac_peak_13817 | 22.28045 | C17orf70_ENSG00000185504                                                                               |
| 17 | 79603693 | 79604064 | KD2-H4K8ac_peak_13818 | 12.13241 | TSPAN10_ENSG00000182612                                                                                |
| 17 | 79604580 | 79604804 | KD2-H4K8ac_peak_13819 | 4.42765  | TSPAN10_ENSG00000182612                                                                                |
| 17 | 79633241 | 79633568 | KD2-H4K8ac_peak_13820 | 11.83301 | OXLD1_ENSG00000204237;CCDC137_ENSG00000185298                                                          |
| 17 | 79633814 | 79634351 | KD2-H4K8ac_peak_13821 | 14.73375 | OXLD1_ENSG00000204237;CCDC137_ENSG00000185298                                                          |
| 17 | 79650341 | 79650730 | KD2-H4K8ac_peak_13822 | 6.70962  | ARL16_ENSG00000214087;HGS_ENSG00000185359                                                              |
| 17 | 79651145 | 79651469 | KD2-H4K8ac_peak_13823 | 14.10488 | ARL16_ENSG00000214087;HGS_ENSG00000185359                                                              |
| 17 | 79669982 | 79671239 | KD2-H4K8ac_peak_13824 | 31.75202 | RP13-1032II.7_ENSG00000262049;MRPL12_ENSG00000262814;SLC25A10_ENSG00000262660;SLC25A10_ENSG00000183048 |
| 17 | 79677533 | 79677826 | KD2-H4K8ac_peak_13825 | 5.9696   |                                                                                                        |
| 17 | 79678112 | 79678475 | KD2-H4K8ac_peak_13826 | 5.75757  |                                                                                                        |
| 17 | 79678864 | 79679168 | KD2-H4K8ac_peak_13827 | 11.05155 |                                                                                                        |
| 17 | 79772913 | 79773494 | KD2-H4K8ac_peak_13828 | 5.9696   |                                                                                                        |
| 17 | 79790472 | 79790963 | KD2-H4K8ac_peak_13829 | 15.81243 | FAM195B_ENSG00000225663                                                                                |
| 17 | 79791273 | 79791929 | KD2-H4K8ac_peak_13830 | 14.43794 | FAM195B_ENSG00000225663;PPP1R27_ENSG00000182676                                                        |
| 17 | 79818026 | 79818349 | KD2-H4K8ac_peak_13831 | 9.47033  | P4HB_ENSG00000185624                                                                                   |
| 17 | 79819059 | 79819624 | KD2-H4K8ac_peak_13832 | 14.39182 | P4HB_ENSG00000185624                                                                                   |
| 17 | 79824719 | 79825394 | KD2-H4K8ac_peak_13833 | 9.19219  | RP11-498C9.3_ENSG00000262413                                                                           |
| 17 | 79825813 | 79826539 | KD2-H4K8ac_peak_13834 | 8.86099  | RP11-498C9.3_ENSG00000262413                                                                           |
| 17 | 79828104 | 79828964 | KD2-H4K8ac_peak_13835 | 14.17488 | ARHGDI1_ENSG00000141522                                                                                |
| 17 | 79829333 | 79830328 | KD2-H4K8ac_peak_13836 | 33.44672 | ARHGDI1_ENSG00000141522                                                                                |
| 17 | 79848310 | 79849422 | KD2-H4K8ac_peak_13837 | 11.28765 | ALYREF_ENSG00000183684;ANAPC11_ENSG00000141552                                                         |
| 17 | 79849686 | 79850303 | KD2-H4K8ac_peak_13838 | 5.4779   | ALYREF_ENSG00000183684                                                                                 |
| 17 | 79859684 | 79860635 | KD2-H4K8ac_peak_13839 | 10.29842 |                                                                                                        |
| 17 | 79876149 | 79876561 | KD2-H4K8ac_peak_13840 | 17.53289 |                                                                                                        |
| 17 | 79884618 | 79885039 | KD2-H4K8ac_peak_13841 | 9.11891  | MAFG_ENSG00000197063;MAFG-AS1_ENSG00000265688                                                          |
| 17 | 79885844 | 79886748 | KD2-H4K8ac_peak_13842 | 11.86355 | MAFG_ENSG00000197063;MAFG-AS1_ENSG00000265688                                                          |
| 17 | 79894573 | 79895089 | KD2-H4K8ac_peak_13843 | 16.58186 |                                                                                                        |
| 17 | 79895327 | 79896239 | KD2-H4K8ac_peak_13844 | 21.79955 |                                                                                                        |

|    |          |          |                       |          |                                                             |
|----|----------|----------|-----------------------|----------|-------------------------------------------------------------|
| 17 | 79910604 | 79910798 | KD2-H4K8ac_peak_13845 | 5.30799  |                                                             |
| 17 | 79917200 | 79917480 | KD2-H4K8ac_peak_13846 | 14.99434 |                                                             |
| 17 | 79924474 | 79925966 | KD2-H4K8ac_peak_13847 | 17.90608 | RP11-498C9.17_ENSG00000264735                               |
| 17 | 79926162 | 79926503 | KD2-H4K8ac_peak_13848 | 3.83717  |                                                             |
| 17 | 79926702 | 79926917 | KD2-H4K8ac_peak_13849 | 7.07117  |                                                             |
| 17 | 79934590 | 79934809 | KD2-H4K8ac_peak_13850 | 4.93968  | ASPSCR1_ENSG00000169696                                     |
| 17 | 79935472 | 79936172 | KD2-H4K8ac_peak_13851 | 11.10856 | ASPSCR1_ENSG00000169696                                     |
| 17 | 79949129 | 79951081 | KD2-H4K8ac_peak_13852 | 14.85549 |                                                             |
| 17 | 79970522 | 79970770 | KD2-H4K8ac_peak_13853 | 5.98692  |                                                             |
| 17 | 79971202 | 79971697 | KD2-H4K8ac_peak_13854 | 4.28151  |                                                             |
| 17 | 79981293 | 79981597 | KD2-H4K8ac_peak_13855 | 8.84009  | STRA13_ENSG00000169689;LRRC45_ENSG00000169683               |
| 17 | 79988711 | 79989347 | KD2-H4K8ac_peak_13856 | 8.63033  | RAC3_ENSG00000169750                                        |
| 17 | 79995028 | 79995625 | KD2-H4K8ac_peak_13857 | 19.04925 | DCXR_ENSG00000169738;RP13-650J16.1_ENSG00000264569          |
| 17 | 80008811 | 80009509 | KD2-H4K8ac_peak_13858 | 22.04674 | RFNG_ENSG00000169733;GPS1_ENSG00000169727                   |
| 17 | 80009846 | 80010203 | KD2-H4K8ac_peak_13859 | 12.08081 | RFNG_ENSG00000169733                                        |
| 17 | 80023270 | 80024650 | KD2-H4K8ac_peak_13860 | 23.83902 | DUS1L_ENSG00000169718                                       |
| 17 | 80055377 | 80056023 | KD2-H4K8ac_peak_13861 | 4.72493  | FASN_ENSG00000169710                                        |
| 17 | 80056386 | 80057842 | KD2-H4K8ac_peak_13862 | 21.12734 | FASN_ENSG00000169710                                        |
| 17 | 80062950 | 80063201 | KD2-H4K8ac_peak_13863 | 9.26408  |                                                             |
| 17 | 80063547 | 80064991 | KD2-H4K8ac_peak_13864 | 14.69327 |                                                             |
| 17 | 80163968 | 80164223 | KD2-H4K8ac_peak_13865 | 9.01262  |                                                             |
| 17 | 80170367 | 80171610 | KD2-H4K8ac_peak_13866 | 16.50872 | CCDC57_ENSG00000176155;RP13-516M14.2_ENSG00000264548        |
| 17 | 80186150 | 80186813 | KD2-H4K8ac_peak_13867 | 6.99815  | SLC16A3_ENSG00000141526                                     |
| 17 | 80187032 | 80187302 | KD2-H4K8ac_peak_13868 | 12.32775 | SLC16A3_ENSG00000141526                                     |
| 17 | 80199089 | 80199602 | KD2-H4K8ac_peak_13869 | 7.73264  |                                                             |
| 17 | 80231007 | 80231961 | KD2-H4K8ac_peak_13870 | 13.94213 | CSNK1D_ENSG00000141551                                      |
| 17 | 80240574 | 80240767 | KD2-H4K8ac_peak_13871 | 6.30607  |                                                             |
| 17 | 80241542 | 80241747 | KD2-H4K8ac_peak_13872 | 7.39141  |                                                             |
| 17 | 80250149 | 80250617 | KD2-H4K8ac_peak_13873 | 12.53675 | RP13-516M14.4_ENSG00000265692;RP13-516M14.1_ENSG00000260563 |
| 17 | 80251499 | 80251877 | KD2-H4K8ac_peak_13874 | 8.85813  | RP13-516M14.4_ENSG00000265692;RP13-516M14.1_ENSG00000260563 |
| 17 | 80255294 | 80256697 | KD2-H4K8ac_peak_13875 | 32.47076 |                                                             |
| 17 | 80259252 | 80259498 | KD2-H4K8ac_peak_13876 | 8.50556  |                                                             |
| 17 | 80290286 | 80290571 | KD2-H4K8ac_peak_13877 | 6.18657  |                                                             |
| 17 | 80316819 | 80317286 | KD2-H4K8ac_peak_13878 | 8.55271  | TEX19_ENSG00000182459                                       |
| 17 | 80376234 | 80376816 | KD2-H4K8ac_peak_13879 | 20.18584 | OGFOD3_ENSG00000181396;HEXDC_ENSG00000169660                |
| 17 | 80408228 | 80408629 | KD2-H4K8ac_peak_13880 | 7.76104  | C17orf62_ENSG00000178927                                    |
| 17 | 80416091 | 80416379 | KD2-H4K8ac_peak_13881 | 29.64378 | RP13-20L14.6_ENSG00000265458;NARF_ENSG00000141562           |
| 17 | 80451990 | 80452312 | KD2-H4K8ac_peak_13882 | 9.63487  |                                                             |
| 17 | 80454699 | 80455089 | KD2-H4K8ac_peak_13883 | 11.27376 |                                                             |
| 17 | 80455451 | 80455675 | KD2-H4K8ac_peak_13884 | 12.4684  |                                                             |
| 17 | 80476647 | 80477389 | KD2-H4K8ac_peak_13885 | 32.65156 | FOXK2_ENSG00000141568                                       |
| 17 | 80550398 | 80550683 | KD2-H4K8ac_peak_13886 | 3.62612  |                                                             |
| 17 | 80550944 | 80551841 | KD2-H4K8ac_peak_13887 | 17.53289 |                                                             |
| 17 | 80569078 | 80569292 | KD2-H4K8ac_peak_13888 | 6.67092  |                                                             |
| 17 | 80605823 | 80606272 | KD2-H4K8ac_peak_13889 | 10.35678 | WDR45B_ENSG00000141580                                      |
| 17 | 80606819 | 80607089 | KD2-H4K8ac_peak_13890 | 11.26685 | WDR45B_ENSG00000141580                                      |

|    |          |          |                       |          |                                                                            |
|----|----------|----------|-----------------------|----------|----------------------------------------------------------------------------|
| 17 | 80622543 | 80622874 | KD2-H4K8ac_peak_13891 | 6.08185  |                                                                            |
| 17 | 80655497 | 80655759 | KD2-H4K8ac_peak_13892 | 7.40314  | RAB40B_ENSG00000141542                                                     |
| 17 | 80667899 | 80668191 | KD2-H4K8ac_peak_13893 | 3.87922  |                                                                            |
| 17 | 80692484 | 80693875 | KD2-H4K8ac_peak_13894 | 19.28826 | FN3K_ENSG00000167363;RP11-388C12.5_ENSG00000263321                         |
| 17 | 80709073 | 80709375 | KD2-H4K8ac_peak_13895 | 8.4716   | TBCD_ENSG00000141556                                                       |
| 17 | 80709689 | 80710435 | KD2-H4K8ac_peak_13896 | 9.36516  | TBCD_ENSG00000141556                                                       |
| 17 | 80751447 | 80752198 | KD2-H4K8ac_peak_13897 | 9.63487  |                                                                            |
| 17 | 80787867 | 80788828 | KD2-H4K8ac_peak_13898 | 20.30085 |                                                                            |
| 17 | 80824384 | 80824778 | KD2-H4K8ac_peak_13899 | 5.3157   |                                                                            |
| 17 | 80824982 | 80825238 | KD2-H4K8ac_peak_13900 | 9.36665  |                                                                            |
| 17 | 80838428 | 80838658 | KD2-H4K8ac_peak_13901 | 5.1707   |                                                                            |
| 17 | 80839308 | 80839587 | KD2-H4K8ac_peak_13902 | 8.79106  |                                                                            |
| 17 | 81009151 | 81009503 | KD2-H4K8ac_peak_13903 | 10.66719 | B3GNTL1_ENSG00000175711                                                    |
| 17 | 81009896 | 81010397 | KD2-H4K8ac_peak_13904 | 15.19625 | B3GNTL1_ENSG00000175711                                                    |
| 17 | 81027955 | 81028163 | KD2-H4K8ac_peak_13905 | 5.78354  |                                                                            |
| 17 | 81036859 | 81037307 | KD2-H4K8ac_peak_13906 | 8.58725  | METRNL_ENSG00000176845                                                     |
| 18 | 158107   | 158358   | KD2-H4K8ac_peak_13907 | 10.21502 | USP14_ENSG00000101557                                                      |
| 18 | 158561   | 159048   | KD2-H4K8ac_peak_13908 | 13.09607 | USP14_ENSG00000101557                                                      |
| 18 | 268147   | 268846   | KD2-H4K8ac_peak_13909 | 10.19949 | THOC1_ENSG00000079134;RP11-705O1.8_ENSG00000263884                         |
| 18 | 657214   | 657505   | KD2-H4K8ac_peak_13910 | 8.82427  | C18orf56_ENSG00000176912;RP11-806L2.5_ENSG00000263727;TYMS_ENSG00000176890 |
| 18 | 657806   | 658232   | KD2-H4K8ac_peak_13911 | 5.01002  | C18orf56_ENSG00000176912;RP11-806L2.5_ENSG00000263727;TYMS_ENSG00000176890 |
| 18 | 658668   | 658934   | KD2-H4K8ac_peak_13912 | 6.8836   | C18orf56_ENSG00000176912                                                   |
| 18 | 812592   | 812950   | KD2-H4K8ac_peak_13913 | 7.27716  | YES1_ENSG00000176105;RP11-672L10.6_ENSG00000273355                         |
| 18 | 2570593  | 2570886  | KD2-H4K8ac_peak_13914 | 7.12754  | METTL4_ENSG00000101574;NDC80_ENSG00000080986                               |
| 18 | 2571084  | 2571381  | KD2-H4K8ac_peak_13915 | 8.1233   | METTL4_ENSG00000101574;NDC80_ENSG00000080986                               |
| 18 | 2655291  | 2655523  | KD2-H4K8ac_peak_13916 | 7.49599  | CBX3P2_ENSG00000266405;SMCHD1_ENSG00000101596                              |
| 18 | 2655967  | 2656184  | KD2-H4K8ac_peak_13917 | 8.10216  | CBX3P2_ENSG00000266405;SMCHD1_ENSG00000101596                              |
| 18 | 2905845  | 2906870  | KD2-H4K8ac_peak_13918 | 11.24702 |                                                                            |
| 18 | 3012535  | 3013119  | KD2-H4K8ac_peak_13919 | 10.19949 | LPIN2_ENSG00000101577                                                      |
| 18 | 3013864  | 3014355  | KD2-H4K8ac_peak_13920 | 13.4559  | LPIN2_ENSG00000101577                                                      |
| 18 | 3049714  | 3049908  | KD2-H4K8ac_peak_13921 | 5.25071  |                                                                            |
| 18 | 3246878  | 3247267  | KD2-H4K8ac_peak_13922 | 7.47462  | RP13-270P17.3_ENSG00000272688;MYL12A_ENSG00000101608                       |
| 18 | 3247855  | 3248157  | KD2-H4K8ac_peak_13923 | 7.07117  | RP13-270P17.3_ENSG00000272688;MYL12A_ENSG00000101608                       |
| 18 | 3261666  | 3262278  | KD2-H4K8ac_peak_13924 | 15.9336  | RP13-270P17.1_ENSG00000264235;MYL12B_ENSG00000118680                       |
| 18 | 3297187  | 3297482  | KD2-H4K8ac_peak_13925 | 16.57619 |                                                                            |
| 18 | 3450250  | 3450917  | KD2-H4K8ac_peak_13926 | 7.44324  |                                                                            |
| 18 | 3499027  | 3499397  | KD2-H4K8ac_peak_13927 | 9.95119  |                                                                            |
| 18 | 3530257  | 3530483  | KD2-H4K8ac_peak_13928 | 7.59643  |                                                                            |
| 18 | 3594662  | 3595121  | KD2-H4K8ac_peak_13929 | 6.25869  | DLGAPI-AS1_ENSG00000177337                                                 |
| 18 | 3595945  | 3596156  | KD2-H4K8ac_peak_13930 | 6.08655  |                                                                            |
| 18 | 3621761  | 3622261  | KD2-H4K8ac_peak_13931 | 5.25071  |                                                                            |
| 18 | 3624017  | 3624310  | KD2-H4K8ac_peak_13932 | 4.24345  |                                                                            |
| 18 | 3625176  | 3625400  | KD2-H4K8ac_peak_13933 | 8.09113  |                                                                            |
| 18 | 5237113  | 5238546  | KD2-H4K8ac_peak_13934 | 6.66359  | RP11-835E18.5_ENSG00000265091;LINC00526_ENSG00000264575                    |
| 18 | 5294742  | 5295873  | KD2-H4K8ac_peak_13935 | 13.57066 |                                                                            |
| 18 | 5296404  | 5296611  | KD2-H4K8ac_peak_13936 | 7.40111  | ZBTB14_ENSG00000198081                                                     |

|    |          |          |                       |          |                                                      |
|----|----------|----------|-----------------------|----------|------------------------------------------------------|
| 18 | 5890266  | 5890625  | KD2-H4K8ac_peak_13937 | 9.15069  |                                                      |
| 18 | 5895622  | 5896312  | KD2-H4K8ac_peak_13938 | 6.57893  | TMEM200C_ENSG00000206432                             |
| 18 | 6414230  | 6415466  | KD2-H4K8ac_peak_13939 | 13.80019 | L3MBTL4_ENSG00000154655                              |
| 18 | 6728992  | 6729226  | KD2-H4K8ac_peak_13940 | 6.57893  | RP11-91I8.3_ENSG00000266441;ARHGAP28_ENSG00000088756 |
| 18 | 6729645  | 6730025  | KD2-H4K8ac_peak_13941 | 6.66692  | RP11-91I8.3_ENSG00000266441;ARHGAP28_ENSG00000088756 |
| 18 | 6781252  | 6781777  | KD2-H4K8ac_peak_13942 | 8.1718   |                                                      |
| 18 | 6970591  | 6970813  | KD2-H4K8ac_peak_13943 | 8.59579  |                                                      |
| 18 | 7118049  | 7118250  | KD2-H4K8ac_peak_13944 | 7.76329  | LAMA1_ENSG00000101680                                |
| 18 | 7383081  | 7383303  | KD2-H4K8ac_peak_13945 | 5.73839  |                                                      |
| 18 | 7567786  | 7568142  | KD2-H4K8ac_peak_13946 | 5.72327  |                                                      |
| 18 | 8139327  | 8139527  | KD2-H4K8ac_peak_13947 | 4.35659  |                                                      |
| 18 | 8253124  | 8253352  | KD2-H4K8ac_peak_13948 | 4.70206  |                                                      |
| 18 | 8255703  | 8255972  | KD2-H4K8ac_peak_13949 | 4.77079  |                                                      |
| 18 | 8260398  | 8261356  | KD2-H4K8ac_peak_13950 | 7.27716  |                                                      |
| 18 | 8367406  | 8367767  | KD2-H4K8ac_peak_13951 | 4.67342  | RP11-789C17.3_ENSG00000266149                        |
| 18 | 8397025  | 8397279  | KD2-H4K8ac_peak_13952 | 9.1707   |                                                      |
| 18 | 8608759  | 8609026  | KD2-H4K8ac_peak_13953 | 5.9696   | RAB12_ENSG00000206418                                |
| 18 | 8614956  | 8615208  | KD2-H4K8ac_peak_13954 | 5.82799  |                                                      |
| 18 | 8656821  | 8657302  | KD2-H4K8ac_peak_13955 | 8.00457  |                                                      |
| 18 | 8657607  | 8657801  | KD2-H4K8ac_peak_13956 | 6.05809  |                                                      |
| 18 | 8661615  | 8661833  | KD2-H4K8ac_peak_13957 | 9.98013  |                                                      |
| 18 | 8704553  | 8704891  | KD2-H4K8ac_peak_13958 | 8.30974  | SOGA2_ENSG00000168502                                |
| 18 | 8705642  | 8705928  | KD2-H4K8ac_peak_13959 | 12.3187  | SOGA2_ENSG00000168502                                |
| 18 | 8765467  | 8765706  | KD2-H4K8ac_peak_13960 | 6.76298  |                                                      |
| 18 | 8766149  | 8766349  | KD2-H4K8ac_peak_13961 | 4.37815  |                                                      |
| 18 | 8766645  | 8767341  | KD2-H4K8ac_peak_13962 | 11.75669 |                                                      |
| 18 | 8792770  | 8793007  | KD2-H4K8ac_peak_13963 | 5.9696   |                                                      |
| 18 | 8794283  | 8794558  | KD2-H4K8ac_peak_13964 | 5.88845  |                                                      |
| 18 | 9017603  | 9017885  | KD2-H4K8ac_peak_13965 | 6.2781   |                                                      |
| 18 | 9102749  | 9102974  | KD2-H4K8ac_peak_13966 | 14.68449 | NDUFV2_ENSG00000178127;RP11-21J18.1_ENSG00000265257  |
| 18 | 9334770  | 9335219  | KD2-H4K8ac_peak_13967 | 14.43704 | RP11-888D10.3_ENSG00000264964;TWSG1_ENSG00000128791  |
| 18 | 9474147  | 9474495  | KD2-H4K8ac_peak_13968 | 8.74596  | RP11-61L19.2_ENSG00000273335;RALBP1_ENSG00000017797  |
| 18 | 9474785  | 9475143  | KD2-H4K8ac_peak_13969 | 7.62396  | RP11-61L19.2_ENSG00000273335;RALBP1_ENSG00000017797  |
| 18 | 9475926  | 9476187  | KD2-H4K8ac_peak_13970 | 5.54647  | RALBP1_ENSG00000017797                               |
| 18 | 9613693  | 9614541  | KD2-H4K8ac_peak_13971 | 21.10246 | PPP4R1_ENSG00000154845;RP11-692N5.1_ENSG00000263627  |
| 18 | 9614756  | 9615336  | KD2-H4K8ac_peak_13972 | 22.36554 | PPP4R1_ENSG00000154845;RP11-692N5.1_ENSG00000263627  |
| 18 | 9707915  | 9708280  | KD2-H4K8ac_peak_13973 | 5.1707   | RAB31_ENSG00000168461                                |
| 18 | 9803656  | 9804265  | KD2-H4K8ac_peak_13974 | 10.19949 |                                                      |
| 18 | 9914065  | 9914787  | KD2-H4K8ac_peak_13975 | 20.08519 | VAPA_ENSG00000101558                                 |
| 18 | 10168315 | 10168507 | KD2-H4K8ac_peak_13976 | 7.45501  |                                                      |
| 18 | 10246231 | 10246674 | KD2-H4K8ac_peak_13977 | 7.70289  |                                                      |
| 18 | 10454635 | 10455226 | KD2-H4K8ac_peak_13978 | 6.85193  | APCDD1_ENSG00000154856                               |
| 18 | 10526194 | 10526419 | KD2-H4K8ac_peak_13979 | 4.211    | NAPG_ENSG00000134265                                 |
| 18 | 11908522 | 11909188 | KD2-H4K8ac_peak_13980 | 8.30974  | MPPE1_ENSG00000154889;RP11-820I16.4_ENSG00000273141  |
| 18 | 12059294 | 12059489 | KD2-H4K8ac_peak_13981 | 5.57044  |                                                      |
| 18 | 12076312 | 12076801 | KD2-H4K8ac_peak_13982 | 9.63487  | RP11-815J4.6_ENSG00000256616                         |

|    |          |          |                       |          |                                                                         |
|----|----------|----------|-----------------------|----------|-------------------------------------------------------------------------|
| 18 | 12271324 | 12271694 | KD2-H4K8ac_peak_13983 | 10.46264 |                                                                         |
| 18 | 12307816 | 12308077 | KD2-H4K8ac_peak_13984 | 12.08081 | TUBB6_ENSG00000176014                                                   |
| 18 | 12308433 | 12308787 | KD2-H4K8ac_peak_13985 | 4.91674  | TUBB6_ENSG00000176014                                                   |
| 18 | 12376721 | 12377153 | KD2-H4K8ac_peak_13986 | 6.65673  | AFG3L2_ENSG00000141385                                                  |
| 18 | 12407965 | 12408574 | KD2-H4K8ac_peak_13987 | 11.86082 | SLMO1_ENSG00000141391                                                   |
| 18 | 12419935 | 12420487 | KD2-H4K8ac_peak_13988 | 13.70605 |                                                                         |
| 18 | 12420854 | 12421281 | KD2-H4K8ac_peak_13989 | 16.8435  |                                                                         |
| 18 | 12658157 | 12658705 | KD2-H4K8ac_peak_13990 | 6.99815  | SPIRE1_ENSG00000134278;AP005482.1_ENSG00000215527;PSMG2_ENSG00000128789 |
| 18 | 12702380 | 12703367 | KD2-H4K8ac_peak_13991 | 7.49599  | CEP76_ENSG00000101624                                                   |
| 18 | 12883263 | 12884191 | KD2-H4K8ac_peak_13992 | 17.43705 |                                                                         |
| 18 | 12884437 | 12884640 | KD2-H4K8ac_peak_13993 | 6.40683  |                                                                         |
| 18 | 12948012 | 12948869 | KD2-H4K8ac_peak_13994 | 12.06346 | SEH1L_ENSG00000085415                                                   |
| 18 | 12991416 | 12991637 | KD2-H4K8ac_peak_13995 | 7.76104  | RP11-773H22.4_ENSG00000266969;CEP192_ENSG00000101639                    |
| 18 | 13136789 | 13137414 | KD2-H4K8ac_peak_13996 | 10.43145 |                                                                         |
| 18 | 13217039 | 13217840 | KD2-H4K8ac_peak_13997 | 7.146    | RP11-794M8.1_ENSG00000267239;LDLRAD4_ENSG00000168675                    |
| 18 | 13218053 | 13218588 | KD2-H4K8ac_peak_13998 | 7.96322  | LDLRAD4_ENSG00000168675                                                 |
| 18 | 13223432 | 13223642 | KD2-H4K8ac_peak_13999 | 8.5092   |                                                                         |
| 18 | 13223889 | 13224248 | KD2-H4K8ac_peak_14000 | 6.99815  |                                                                         |
| 18 | 13225387 | 13225608 | KD2-H4K8ac_peak_14001 | 8.82427  |                                                                         |
| 18 | 13265755 | 13265989 | KD2-H4K8ac_peak_14002 | 5.14125  |                                                                         |
| 18 | 13500303 | 13500608 | KD2-H4K8ac_peak_14003 | 6.47635  | RP11-53B2.5_ENSG00000267366                                             |
| 18 | 13503371 | 13503658 | KD2-H4K8ac_peak_14004 | 4.77079  |                                                                         |
| 18 | 13570285 | 13570504 | KD2-H4K8ac_peak_14005 | 4.42765  |                                                                         |
| 18 | 13583732 | 13583993 | KD2-H4K8ac_peak_14006 | 7.27716  |                                                                         |
| 18 | 13584341 | 13584583 | KD2-H4K8ac_peak_14007 | 6.54442  |                                                                         |
| 18 | 13726167 | 13726409 | KD2-H4K8ac_peak_14008 | 3.75035  | FAM210A_ENSG00000177150;RNMT_ENSG00000101654                            |
| 18 | 13726841 | 13727318 | KD2-H4K8ac_peak_14009 | 7.47462  | FAM210A_ENSG00000177150;RNMT_ENSG00000101654                            |
| 18 | 14132159 | 14132391 | KD2-H4K8ac_peak_14010 | 10.86378 | ZNF519_ENSG00000175322                                                  |
| 18 | 14132863 | 14133087 | KD2-H4K8ac_peak_14011 | 8.74596  | ZNF519_ENSG00000175322                                                  |
| 18 | 18690977 | 18691622 | KD2-H4K8ac_peak_14012 | 8.55271  | ROCK1_ENSG00000067900                                                   |
| 18 | 19179832 | 19180634 | KD2-H4K8ac_peak_14013 | 8.16906  | ESCO1_ENSG00000141446                                                   |
| 18 | 19181168 | 19181613 | KD2-H4K8ac_peak_14014 | 11.89502 | ESCO1_ENSG00000141446                                                   |
| 18 | 19191853 | 19192111 | KD2-H4K8ac_peak_14015 | 13.88933 | SNRPD1_ENSG00000167088                                                  |
| 18 | 19192322 | 19192686 | KD2-H4K8ac_peak_14016 | 10.96455 | SNRPD1_ENSG00000167088                                                  |
| 18 | 19320829 | 19321319 | KD2-H4K8ac_peak_14017 | 13.95627 |                                                                         |
| 18 | 20513419 | 20513667 | KD2-H4K8ac_peak_14018 | 15.40891 | RP11-739L10.1_ENSG00000265943;MIR4741_ENSG00000264817                   |
| 18 | 20714981 | 20715258 | KD2-H4K8ac_peak_14019 | 5.66705  | CABLES1_ENSG00000134508                                                 |
| 18 | 20715569 | 20716512 | KD2-H4K8ac_peak_14020 | 5.1628   | AC105247.1_ENSG00000222999                                              |
| 18 | 20723406 | 20724101 | KD2-H4K8ac_peak_14021 | 5.9696   |                                                                         |
| 18 | 20736017 | 20736365 | KD2-H4K8ac_peak_14022 | 13.44374 |                                                                         |
| 18 | 20757524 | 20757743 | KD2-H4K8ac_peak_14023 | 5.57044  |                                                                         |
| 18 | 20839635 | 20840385 | KD2-H4K8ac_peak_14024 | 17.19888 | RP11-17J14.2_ENSG00000266495                                            |
| 18 | 21032761 | 21032969 | KD2-H4K8ac_peak_14025 | 7.69294  | RIOK3_ENSG00000101782                                                   |
| 18 | 21083540 | 21083775 | KD2-H4K8ac_peak_14026 | 4.06758  | C18orf8_ENSG00000141452                                                 |
| 18 | 21166576 | 21166783 | KD2-H4K8ac_peak_14027 | 11.43863 | NPC1_ENSG00000141458                                                    |
| 18 | 21269521 | 21270042 | KD2-H4K8ac_peak_14028 | 4.44527  | LAMA3_ENSG00000053747                                                   |

|    |          |          |                       |          |                                                                             |
|----|----------|----------|-----------------------|----------|-----------------------------------------------------------------------------|
| 18 | 21352157 | 21352365 | KD2-H4K8ac_peak_14029 | 7.79898  |                                                                             |
| 18 | 21594254 | 21595356 | KD2-H4K8ac_peak_14030 | 11.09936 | RP11-403A21.2_ENSG00000264745                                               |
| 18 | 21684110 | 21684430 | KD2-H4K8ac_peak_14031 | 9.98013  |                                                                             |
| 18 | 21718967 | 21719336 | KD2-H4K8ac_peak_14032 | 5.54647  | CABYR_ENSG00000154040                                                       |
| 18 | 21968393 | 21968670 | KD2-H4K8ac_peak_14033 | 9.63776  |                                                                             |
| 18 | 21977387 | 21977724 | KD2-H4K8ac_peak_14034 | 13.12288 | OSBPL1A_ENSG00000141447                                                     |
| 18 | 21997223 | 21997435 | KD2-H4K8ac_peak_14035 | 5.88845  |                                                                             |
| 18 | 22005978 | 22007193 | KD2-H4K8ac_peak_14036 | 19.43192 | IMPACT_ENSG00000154059                                                      |
| 18 | 22929561 | 22929847 | KD2-H4K8ac_peak_14037 | 4.84794  |                                                                             |
| 18 | 22930228 | 22930491 | KD2-H4K8ac_peak_14038 | 6.8836   |                                                                             |
| 18 | 22930772 | 22931162 | KD2-H4K8ac_peak_14039 | 7.12754  | ZNF521_ENSG00000198795                                                      |
| 18 | 22931656 | 22932038 | KD2-H4K8ac_peak_14040 | 7.47462  | ZNF521_ENSG00000198795                                                      |
| 18 | 23184983 | 23185178 | KD2-H4K8ac_peak_14041 | 9.89126  |                                                                             |
| 18 | 23670308 | 23670785 | KD2-H4K8ac_peak_14042 | 11.02863 | SS18_ENSG00000141380                                                        |
| 18 | 24127972 | 24128494 | KD2-H4K8ac_peak_14043 | 9.89126  |                                                                             |
| 18 | 24129075 | 24129382 | KD2-H4K8ac_peak_14044 | 9.07715  |                                                                             |
| 18 | 24129886 | 24130086 | KD2-H4K8ac_peak_14045 | 7.146    |                                                                             |
| 18 | 24229445 | 24229780 | KD2-H4K8ac_peak_14046 | 8.5092   |                                                                             |
| 18 | 24235546 | 24237321 | KD2-H4K8ac_peak_14047 | 15.61313 | KCTD1_ENSG00000134504;AQP4-AS1_ENSG00000260372                              |
| 18 | 24265439 | 24265705 | KD2-H4K8ac_peak_14048 | 6.2781   |                                                                             |
| 18 | 24443273 | 24443678 | KD2-H4K8ac_peak_14049 | 6.40297  |                                                                             |
| 18 | 25755748 | 25756151 | KD2-H4K8ac_peak_14050 | 9.1707   |                                                                             |
| 18 | 25757330 | 25758552 | KD2-H4K8ac_peak_14051 | 14.98671 | CDH2_ENSG00000170558                                                        |
| 18 | 29264783 | 29266155 | KD2-H4K8ac_peak_14052 | 9.1707   | B4GALT6_ENSG00000118276;RP11-549B18.1_ENSG00000259985                       |
| 18 | 29303716 | 29304695 | KD2-H4K8ac_peak_14053 | 11.30637 | LRRC37A7P_ENSG00000265158                                                   |
| 18 | 29522496 | 29523031 | KD2-H4K8ac_peak_14054 | 9.20193  | RP11-326K13.4_ENSG00000263823                                               |
| 18 | 29598586 | 29599516 | KD2-H4K8ac_peak_14055 | 12.00273 | RNF125_ENSG00000101695;RP11-53I6.2_ENSG00000263917                          |
| 18 | 29671581 | 29672259 | KD2-H4K8ac_peak_14056 | 8.55271  | RP11-53I6.3_ENSG00000265008;RNF138_ENSG00000134758                          |
| 18 | 30051048 | 30051244 | KD2-H4K8ac_peak_14057 | 10.17341 | GAREM_ENSG00000141441                                                       |
| 18 | 30349917 | 30350305 | KD2-H4K8ac_peak_14058 | 5.54647  | AC012123.1_ENSG00000228835                                                  |
| 18 | 30350739 | 30351114 | KD2-H4K8ac_peak_14059 | 6.55628  | AC012123.1_ENSG00000228835                                                  |
| 18 | 31020444 | 31020650 | KD2-H4K8ac_peak_14060 | 9.59147  | CCDC178_ENSG00000166960                                                     |
| 18 | 31157867 | 31158212 | KD2-H4K8ac_peak_14061 | 10.19949 | RP11-258B16.1_ENSG00000267642;ASXL3_ENSG00000141431                         |
| 18 | 31158607 | 31158941 | KD2-H4K8ac_peak_14062 | 22.07309 | RP11-258B16.1_ENSG00000267642;ASXL3_ENSG00000141431                         |
| 18 | 31739342 | 31739915 | KD2-H4K8ac_peak_14063 | 6.65673  |                                                                             |
| 18 | 31802404 | 31802998 | KD2-H4K8ac_peak_14064 | 9.96798  | RP11-379L18.1_ENSG00000267746                                               |
| 18 | 31803226 | 31803605 | KD2-H4K8ac_peak_14065 | 5.72327  | RP11-379L18.1_ENSG00000267746                                               |
| 18 | 32828322 | 32828613 | KD2-H4K8ac_peak_14066 | 4.16871  |                                                                             |
| 18 | 32847059 | 32847279 | KD2-H4K8ac_peak_14067 | 8.1233   |                                                                             |
| 18 | 32870306 | 32870588 | KD2-H4K8ac_peak_14068 | 7.76329  | ZSCAN30_ENSG00000186814;RP11-158H5.7_ENSG00000268573;ZNF271_ENSG00000257267 |
| 18 | 32924072 | 32924366 | KD2-H4K8ac_peak_14069 | 22.0091  |                                                                             |
| 18 | 32956705 | 32957095 | KD2-H4K8ac_peak_14070 | 10.7186  | ZNF396_ENSG00000186496                                                      |
| 18 | 33161088 | 33161420 | KD2-H4K8ac_peak_14071 | 11.89502 | GALNT1_ENSG00000141429                                                      |
| 18 | 33161908 | 33162252 | KD2-H4K8ac_peak_14072 | 7.12754  | GALNT1_ENSG00000141429                                                      |
| 18 | 33214277 | 33214485 | KD2-H4K8ac_peak_14073 | 8.1233   |                                                                             |
| 18 | 33530127 | 33530415 | KD2-H4K8ac_peak_14074 | 5.59859  |                                                                             |

|    |          |          |                       |          |                                                      |
|----|----------|----------|-----------------------|----------|------------------------------------------------------|
| 18 | 33597015 | 33597220 | KD2-H4K8ac_peak_14075 | 8.1718   |                                                      |
| 18 | 33647728 | 33647955 | KD2-H4K8ac_peak_14076 | 5.71749  | RPRD1A_ENSG00000141425                               |
| 18 | 33680290 | 33680482 | KD2-H4K8ac_peak_14077 | 7.12754  |                                                      |
| 18 | 33708958 | 33709248 | KD2-H4K8ac_peak_14078 | 14.68449 | SLC39A6_ENSG00000141424;ELP2_ENSG00000134759         |
| 18 | 33709521 | 33709765 | KD2-H4K8ac_peak_14079 | 7.92775  | SLC39A6_ENSG00000141424;ELP2_ENSG00000134759         |
| 18 | 33767207 | 33767823 | KD2-H4K8ac_peak_14080 | 8.53092  | RP11-49I1.1.1_ENSG00000260552;MOCOS_ENSG00000075643  |
| 18 | 33876821 | 33877160 | KD2-H4K8ac_peak_14081 | 6.40297  | FHOD3_ENSG00000134775                                |
| 18 | 33877839 | 33878083 | KD2-H4K8ac_peak_14082 | 5.9696   | FHOD3_ENSG00000134775                                |
| 18 | 33961960 | 33962260 | KD2-H4K8ac_peak_14083 | 7.47462  |                                                      |
| 18 | 34273192 | 34273506 | KD2-H4K8ac_peak_14084 | 12.42547 |                                                      |
| 18 | 34408590 | 34408837 | KD2-H4K8ac_peak_14085 | 4.86324  | TPGS2_ENSG00000134779;KIAA1328_ENSG00000150477       |
| 18 | 34409196 | 34409481 | KD2-H4K8ac_peak_14086 | 4.86324  | TPGS2_ENSG00000134779;KIAA1328_ENSG00000150477       |
| 18 | 34914344 | 34914818 | KD2-H4K8ac_peak_14087 | 4.06758  |                                                      |
| 18 | 34973201 | 34973610 | KD2-H4K8ac_peak_14088 | 7.36799  |                                                      |
| 18 | 34974291 | 34974853 | KD2-H4K8ac_peak_14089 | 8.21852  |                                                      |
| 18 | 35009793 | 35010065 | KD2-H4K8ac_peak_14090 | 6.98292  |                                                      |
| 18 | 35025154 | 35025847 | KD2-H4K8ac_peak_14091 | 7.47462  |                                                      |
| 18 | 35029817 | 35030369 | KD2-H4K8ac_peak_14092 | 7.76329  |                                                      |
| 18 | 35030872 | 35031180 | KD2-H4K8ac_peak_14093 | 10.86378 |                                                      |
| 18 | 35031592 | 35031963 | KD2-H4K8ac_peak_14094 | 5.42867  |                                                      |
| 18 | 35044502 | 35044703 | KD2-H4K8ac_peak_14095 | 5.20998  |                                                      |
| 18 | 35099479 | 35100207 | KD2-H4K8ac_peak_14096 | 6.9556   |                                                      |
| 18 | 35115566 | 35115780 | KD2-H4K8ac_peak_14097 | 7.89389  |                                                      |
| 18 | 35128554 | 35128752 | KD2-H4K8ac_peak_14098 | 4.75875  |                                                      |
| 18 | 35146785 | 35147252 | KD2-H4K8ac_peak_14099 | 5.75452  | CELF4_ENSG00000101489                                |
| 18 | 37421178 | 37421820 | KD2-H4K8ac_peak_14100 | 6.99815  |                                                      |
| 18 | 38951460 | 38951727 | KD2-H4K8ac_peak_14101 | 9.02371  |                                                      |
| 18 | 39254885 | 39255103 | KD2-H4K8ac_peak_14102 | 6.40683  |                                                      |
| 18 | 39255350 | 39255574 | KD2-H4K8ac_peak_14103 | 6.40683  |                                                      |
| 18 | 39772635 | 39772854 | KD2-H4K8ac_peak_14104 | 7.12754  |                                                      |
| 18 | 39879242 | 39879574 | KD2-H4K8ac_peak_14105 | 6.00226  |                                                      |
| 18 | 42259120 | 42259774 | KD2-H4K8ac_peak_14106 | 15.52424 | RP11-456K23.1_ENSG00000267414;SETBP1_ENSG00000152217 |
| 18 | 42260076 | 42260666 | KD2-H4K8ac_peak_14107 | 11.50346 | RP11-456K23.1_ENSG00000267414;SETBP1_ENSG00000152217 |
| 18 | 42260970 | 42261265 | KD2-H4K8ac_peak_14108 | 5.57044  | SETBP1_ENSG00000152217                               |
| 18 | 42295822 | 42296064 | KD2-H4K8ac_peak_14109 | 4.37708  |                                                      |
| 18 | 42322266 | 42322571 | KD2-H4K8ac_peak_14110 | 7.8711   |                                                      |
| 18 | 42323249 | 42323622 | KD2-H4K8ac_peak_14111 | 12.74171 |                                                      |
| 18 | 42324375 | 42325226 | KD2-H4K8ac_peak_14112 | 13.81781 |                                                      |
| 18 | 42451196 | 42451541 | KD2-H4K8ac_peak_14113 | 8.1233   |                                                      |
| 18 | 43168430 | 43168725 | KD2-H4K8ac_peak_14114 | 5.34946  |                                                      |
| 18 | 43417505 | 43417763 | KD2-H4K8ac_peak_14115 | 4.01115  |                                                      |
| 18 | 43546933 | 43547241 | KD2-H4K8ac_peak_14116 | 6.20982  | EPG5_ENSG00000152223                                 |
| 18 | 43547471 | 43548018 | KD2-H4K8ac_peak_14117 | 6.67092  | EPG5_ENSG00000152223                                 |
| 18 | 43607870 | 43608441 | KD2-H4K8ac_peak_14118 | 12.93209 | RP11-8H2.1_ENSG00000267293                           |
| 18 | 43651840 | 43652051 | KD2-H4K8ac_peak_14119 | 4.44527  | PSTPIP2_ENSG00000152229                              |
| 18 | 43683669 | 43683871 | KD2-H4K8ac_peak_14120 | 6.90231  | ATP5A1_ENSG00000152234;HAUS1_ENSG00000152240         |

|    |          |          |                       |          |                          |
|----|----------|----------|-----------------------|----------|--------------------------|
| 18 | 43753274 | 43753857 | KD2-H4K8ac_peak_14121 | 15.9754  | C18orf25_ENSG00000152242 |
| 18 | 43914293 | 43914582 | KD2-H4K8ac_peak_14122 | 18.31034 |                          |
| 18 | 43915706 | 43916099 | KD2-H4K8ac_peak_14123 | 4.77079  |                          |
| 18 | 43918848 | 43919081 | KD2-H4K8ac_peak_14124 | 5.14125  |                          |
| 18 | 43999327 | 43999786 | KD2-H4K8ac_peak_14125 | 6.30229  |                          |
| 18 | 44004233 | 44004724 | KD2-H4K8ac_peak_14126 | 7.96194  |                          |
| 18 | 44013457 | 44013768 | KD2-H4K8ac_peak_14127 | 5.7068   |                          |
| 18 | 44054779 | 44055152 | KD2-H4K8ac_peak_14128 | 3.87414  |                          |
| 18 | 44203493 | 44203716 | KD2-H4K8ac_peak_14129 | 6.2781   |                          |
| 18 | 44496974 | 44497376 | KD2-H4K8ac_peak_14130 | 8.85813  | KATNAL2_ENSG00000167216  |
| 18 | 44497592 | 44497892 | KD2-H4K8ac_peak_14131 | 11.92978 | KATNAL2_ENSG00000167216  |
| 18 | 44498300 | 44498521 | KD2-H4K8ac_peak_14132 | 5.25071  | KATNAL2_ENSG00000167216  |
| 18 | 44676983 | 44677691 | KD2-H4K8ac_peak_14133 | 15.7388  | HDHD2_ENSG00000167220    |
| 18 | 45321621 | 45322210 | KD2-H4K8ac_peak_14134 | 6.68439  |                          |
| 18 | 45325890 | 45326262 | KD2-H4K8ac_peak_14135 | 5.26591  |                          |
| 18 | 45456516 | 45456844 | KD2-H4K8ac_peak_14136 | 8.55271  | SMAD2_ENSG00000175387    |
| 18 | 45457178 | 45457443 | KD2-H4K8ac_peak_14137 | 6.97919  | SMAD2_ENSG00000175387    |
| 18 | 45457742 | 45458003 | KD2-H4K8ac_peak_14138 | 15.61313 | SMAD2_ENSG00000175387    |
| 18 | 45533278 | 45533527 | KD2-H4K8ac_peak_14139 | 5.97274  |                          |
| 18 | 45534002 | 45535149 | KD2-H4K8ac_peak_14140 | 20.88898 |                          |
| 18 | 45548826 | 45549113 | KD2-H4K8ac_peak_14141 | 12.84642 |                          |
| 18 | 45557693 | 45557887 | KD2-H4K8ac_peak_14142 | 5.29555  |                          |
| 18 | 45560642 | 45561069 | KD2-H4K8ac_peak_14143 | 10.19949 |                          |
| 18 | 45561524 | 45562010 | KD2-H4K8ac_peak_14144 | 7.69287  |                          |
| 18 | 45562216 | 45562976 | KD2-H4K8ac_peak_14145 | 11.92978 |                          |
| 18 | 45563245 | 45563794 | KD2-H4K8ac_peak_14146 | 6.56211  |                          |
| 18 | 45586704 | 45586925 | KD2-H4K8ac_peak_14147 | 7.27716  |                          |
| 18 | 45592147 | 45592637 | KD2-H4K8ac_peak_14148 | 9.08816  |                          |
| 18 | 45593120 | 45593437 | KD2-H4K8ac_peak_14149 | 8.10216  |                          |
| 18 | 45598770 | 45599499 | KD2-H4K8ac_peak_14150 | 14.84212 |                          |
| 18 | 45599857 | 45600288 | KD2-H4K8ac_peak_14151 | 5.85291  |                          |
| 18 | 45600587 | 45600806 | KD2-H4K8ac_peak_14152 | 5.21035  |                          |
| 18 | 45611481 | 45611727 | KD2-H4K8ac_peak_14153 | 6.24747  |                          |
| 18 | 45662331 | 45662728 | KD2-H4K8ac_peak_14154 | 6.65673  |                          |
| 18 | 45663081 | 45663426 | KD2-H4K8ac_peak_14155 | 6.66692  |                          |
| 18 | 45687742 | 45688030 | KD2-H4K8ac_peak_14156 | 15.53798 |                          |
| 18 | 45688275 | 45688750 | KD2-H4K8ac_peak_14157 | 6.66692  |                          |
| 18 | 45754727 | 45755003 | KD2-H4K8ac_peak_14158 | 9.3973   |                          |
| 18 | 45756619 | 45756826 | KD2-H4K8ac_peak_14159 | 8.30974  |                          |
| 18 | 45820316 | 45820684 | KD2-H4K8ac_peak_14160 | 8.02571  |                          |
| 18 | 45846530 | 45846723 | KD2-H4K8ac_peak_14161 | 8.21084  |                          |
| 18 | 45868788 | 45869149 | KD2-H4K8ac_peak_14162 | 5.557    |                          |
| 18 | 46065028 | 46065304 | KD2-H4K8ac_peak_14163 | 22.50339 | CTIF_ENSG00000134030     |
| 18 | 46066282 | 46066567 | KD2-H4K8ac_peak_14164 | 4.57782  | CTIF_ENSG00000134030     |
| 18 | 46102287 | 46102538 | KD2-H4K8ac_peak_14165 | 6.25869  |                          |
| 18 | 46119378 | 46119570 | KD2-H4K8ac_peak_14166 | 4.73064  |                          |



|    |          |          |                       |          |                                                                                                  |
|----|----------|----------|-----------------------|----------|--------------------------------------------------------------------------------------------------|
| 18 | 46268348 | 46268938 | KD2-H4K8ac_peak_14167 | 6.90231  |                                                                                                  |
| 18 | 46277562 | 46278214 | KD2-H4K8ac_peak_14168 | 4.91516  |                                                                                                  |
| 18 | 46306182 | 46308108 | KD2-H4K8ac_peak_14169 | 12.00273 |                                                                                                  |
| 18 | 46308356 | 46308727 | KD2-H4K8ac_peak_14170 | 10.43145 |                                                                                                  |
| 18 | 46314069 | 46314447 | KD2-H4K8ac_peak_14171 | 4.56666  |                                                                                                  |
| 18 | 46355076 | 46355583 | KD2-H4K8ac_peak_14172 | 6.40297  |                                                                                                  |
| 18 | 46359460 | 46359683 | KD2-H4K8ac_peak_14173 | 5.14125  |                                                                                                  |
| 18 | 46367537 | 46367747 | KD2-H4K8ac_peak_14174 | 6.66692  |                                                                                                  |
| 18 | 46377418 | 46378119 | KD2-H4K8ac_peak_14175 | 12.68903 |                                                                                                  |
| 18 | 46379570 | 46379840 | KD2-H4K8ac_peak_14176 | 5.45396  |                                                                                                  |
| 18 | 46384994 | 46385323 | KD2-H4K8ac_peak_14177 | 6.99194  |                                                                                                  |
| 18 | 46385739 | 46388104 | KD2-H4K8ac_peak_14178 | 8.85813  |                                                                                                  |
| 18 | 46393277 | 46393789 | KD2-H4K8ac_peak_14179 | 8.59579  |                                                                                                  |
| 18 | 46402540 | 46402813 | KD2-H4K8ac_peak_14180 | 5.88845  |                                                                                                  |
| 18 | 46455018 | 46455678 | KD2-H4K8ac_peak_14181 | 9.43437  |                                                                                                  |
| 18 | 46456690 | 46457234 | KD2-H4K8ac_peak_14182 | 10.96455 |                                                                                                  |
| 18 | 46458110 | 46458831 | KD2-H4K8ac_peak_14183 | 6.25869  |                                                                                                  |
| 18 | 46459854 | 46460380 | KD2-H4K8ac_peak_14184 | 8.83582  |                                                                                                  |
| 18 | 46466968 | 46467256 | KD2-H4K8ac_peak_14185 | 6.40683  |                                                                                                  |
| 18 | 46477889 | 46478337 | KD2-H4K8ac_peak_14186 | 8.23274  | SMAD7_ENSG00000101665                                                                            |
| 18 | 46478650 | 46479586 | KD2-H4K8ac_peak_14187 | 19.39602 |                                                                                                  |
| 18 | 46501712 | 46502126 | KD2-H4K8ac_peak_14188 | 6.20982  |                                                                                                  |
| 18 | 46502422 | 46503111 | KD2-H4K8ac_peak_14189 | 14.48084 |                                                                                                  |
| 18 | 46523222 | 46523507 | KD2-H4K8ac_peak_14190 | 9.1707   |                                                                                                  |
| 18 | 46524807 | 46525284 | KD2-H4K8ac_peak_14191 | 6.66692  |                                                                                                  |
| 18 | 46537478 | 46538015 | KD2-H4K8ac_peak_14192 | 13.09607 |                                                                                                  |
| 18 | 46578914 | 46579462 | KD2-H4K8ac_peak_14193 | 14.68449 |                                                                                                  |
| 18 | 46580039 | 46580508 | KD2-H4K8ac_peak_14194 | 8.30974  |                                                                                                  |
| 18 | 46587623 | 46588165 | KD2-H4K8ac_peak_14195 | 6.25869  |                                                                                                  |
| 18 | 46598795 | 46599183 | KD2-H4K8ac_peak_14196 | 7.12754  |                                                                                                  |
| 18 | 46986551 | 46987032 | KD2-H4K8ac_peak_14197 | 12.17278 | DYM_ENSG00000141627                                                                              |
| 18 | 47013354 | 47013562 | KD2-H4K8ac_peak_14198 | 7.07117  | C18orf32_ENSG00000177576;RP11-110H1.4_ENSG00000263916;MIR1539_ENSG00000265496                    |
| 18 | 47339688 | 47340610 | KD2-H4K8ac_peak_14199 | 12.42761 | ACAA2_ENSG00000167315;SCARNA17_ENSG00000267322;SCARNA17_ENSG00000251992;SCARNA18_ENSG00000252139 |
| 18 | 47807511 | 47807758 | KD2-H4K8ac_peak_14200 | 6.0605   | MBD1_ENSG00000141644                                                                             |
| 18 | 47808289 | 47808618 | KD2-H4K8ac_peak_14201 | 13.95627 | MBD1_ENSG00000141644                                                                             |
| 18 | 47814505 | 47814712 | KD2-H4K8ac_peak_14202 | 4.211    | CXXC1_ENSG00000154832                                                                            |
| 18 | 47824081 | 47825144 | KD2-H4K8ac_peak_14203 | 12.08081 |                                                                                                  |
| 18 | 48086116 | 48086316 | KD2-H4K8ac_peak_14204 | 6.13909  | MAPK4_ENSG00000141639                                                                            |
| 18 | 48086587 | 48086906 | KD2-H4K8ac_peak_14205 | 4.06758  | MAPK4_ENSG00000141639                                                                            |
| 18 | 48404933 | 48406020 | KD2-H4K8ac_peak_14206 | 16.61426 | ME2_ENSG00000082212                                                                              |
| 18 | 48493563 | 48493902 | KD2-H4K8ac_peak_14207 | 6.00226  | ELAC1_ENSG00000141642;RP11-729L2.2_ENSG00000267699;SMAD4_ENSG00000141646                         |
| 18 | 48494192 | 48494926 | KD2-H4K8ac_peak_14208 | 20.0792  | ELAC1_ENSG00000141642;RP11-729L2.2_ENSG00000267699;SMAD4_ENSG00000141646                         |
| 18 | 48556621 | 48557107 | KD2-H4K8ac_peak_14209 | 21.75906 |                                                                                                  |
| 18 | 48722438 | 48723894 | KD2-H4K8ac_peak_14210 | 13.87818 |                                                                                                  |
| 18 | 48724495 | 48725776 | KD2-H4K8ac_peak_14211 | 12.42761 |                                                                                                  |
| 18 | 49180937 | 49181479 | KD2-H4K8ac_peak_14212 | 6.16888  |                                                                                                  |

|    |          |          |                       |          |                                                    |
|----|----------|----------|-----------------------|----------|----------------------------------------------------|
| 18 | 49193400 | 49193965 | KD2-H4K8ac_peak_14213 | 4.211    |                                                    |
| 18 | 51795451 | 51795733 | KD2-H4K8ac_peak_14214 | 8.26945  | POLI_ENSG00000101751                               |
| 18 | 51795979 | 51796197 | KD2-H4K8ac_peak_14215 | 10.05606 | POLI_ENSG00000101751                               |
| 18 | 51796476 | 51796707 | KD2-H4K8ac_peak_14216 | 5.61067  | POLI_ENSG00000101751                               |
| 18 | 51883589 | 51884148 | KD2-H4K8ac_peak_14217 | 12.70959 | STARD6_ENSG00000174448;C18orf54_ENSG00000166845    |
| 18 | 51884540 | 51884856 | KD2-H4K8ac_peak_14218 | 9.31907  | STARD6_ENSG00000174448;C18orf54_ENSG00000166845    |
| 18 | 52968462 | 52968796 | KD2-H4K8ac_peak_14219 | 4.77079  |                                                    |
| 18 | 52987978 | 52988229 | KD2-H4K8ac_peak_14220 | 8.1233   |                                                    |
| 18 | 52988738 | 52989028 | KD2-H4K8ac_peak_14221 | 5.88845  |                                                    |
| 18 | 52989780 | 52990023 | KD2-H4K8ac_peak_14222 | 12.06346 |                                                    |
| 18 | 53066031 | 53066258 | KD2-H4K8ac_peak_14223 | 5.10276  |                                                    |
| 18 | 53073905 | 53074213 | KD2-H4K8ac_peak_14224 | 9.97423  |                                                    |
| 18 | 53090994 | 53091303 | KD2-H4K8ac_peak_14225 | 5.57044  |                                                    |
| 18 | 53255194 | 53255388 | KD2-H4K8ac_peak_14226 | 8.17902  |                                                    |
| 18 | 53257208 | 53257579 | KD2-H4K8ac_peak_14227 | 8.55271  |                                                    |
| 18 | 53446406 | 53446680 | KD2-H4K8ac_peak_14228 | 7.22457  |                                                    |
| 18 | 53446926 | 53447232 | KD2-H4K8ac_peak_14229 | 7.146    |                                                    |
| 18 | 53530125 | 53530320 | KD2-H4K8ac_peak_14230 | 4.35659  |                                                    |
| 18 | 54305356 | 54305681 | KD2-H4K8ac_peak_14231 | 5.59859  |                                                    |
| 18 | 54306806 | 54307001 | KD2-H4K8ac_peak_14232 | 5.57044  |                                                    |
| 18 | 54729961 | 54730179 | KD2-H4K8ac_peak_14233 | 7.12754  |                                                    |
| 18 | 55019718 | 55020712 | KD2-H4K8ac_peak_14234 | 9.36621  |                                                    |
| 18 | 55021074 | 55021718 | KD2-H4K8ac_peak_14235 | 7.76329  |                                                    |
| 18 | 55101922 | 55102395 | KD2-H4K8ac_peak_14236 | 6.40683  | ONECUT2_ENSG00000119547;AC090340.1_ENSG00000266636 |
| 18 | 55105382 | 55105845 | KD2-H4K8ac_peak_14237 | 10.46264 |                                                    |
| 18 | 55253553 | 55253784 | KD2-H4K8ac_peak_14238 | 8.88082  | FECH_ENSG00000066926                               |
| 18 | 55288628 | 55289002 | KD2-H4K8ac_peak_14239 | 7.59643  | NARS_ENSG00000134440                               |
| 18 | 55296861 | 55297456 | KD2-H4K8ac_peak_14240 | 19.9503  | RP11-35G9.3_ENSG00000267040                        |
| 18 | 55297671 | 55297870 | KD2-H4K8ac_peak_14241 | 5.73839  | RP11-35G9.3_ENSG00000267040                        |
| 18 | 55583488 | 55583849 | KD2-H4K8ac_peak_14242 | 9.51625  |                                                    |
| 18 | 55914806 | 55915023 | KD2-H4K8ac_peak_14243 | 6.16888  |                                                    |
| 18 | 56338782 | 56339062 | KD2-H4K8ac_peak_14244 | 12.06346 | RP11-126O1.5_ENSG00000267226;MALT1_ENSG00000172175 |
| 18 | 56530141 | 56531373 | KD2-H4K8ac_peak_14245 | 20.341   | ZNF532_ENSG00000074657                             |
| 18 | 57145304 | 57145522 | KD2-H4K8ac_peak_14246 | 17.42214 |                                                    |
| 18 | 57169279 | 57169481 | KD2-H4K8ac_peak_14247 | 6.8836   |                                                    |
| 18 | 57217748 | 57218093 | KD2-H4K8ac_peak_14248 | 4.24345  |                                                    |
| 18 | 57221253 | 57221485 | KD2-H4K8ac_peak_14249 | 8.04763  |                                                    |
| 18 | 57236054 | 57236430 | KD2-H4K8ac_peak_14250 | 5.14125  |                                                    |
| 18 | 57237996 | 57238206 | KD2-H4K8ac_peak_14251 | 6.56211  |                                                    |
| 18 | 57283831 | 57284225 | KD2-H4K8ac_peak_14252 | 5.57044  |                                                    |
| 18 | 57504425 | 57504723 | KD2-H4K8ac_peak_14253 | 9.15329  |                                                    |
| 18 | 57851444 | 57851692 | KD2-H4K8ac_peak_14254 | 4.37708  |                                                    |
| 18 | 57864828 | 57865124 | KD2-H4K8ac_peak_14255 | 6.16888  |                                                    |
| 18 | 59139317 | 59139545 | KD2-H4K8ac_peak_14256 | 5.88845  |                                                    |
| 18 | 59515852 | 59516198 | KD2-H4K8ac_peak_14257 | 4.47369  |                                                    |
| 18 | 59523574 | 59524124 | KD2-H4K8ac_peak_14258 | 5.13615  |                                                    |

|    |          |          |                       |          |                                                    |
|----|----------|----------|-----------------------|----------|----------------------------------------------------|
| 18 | 59560624 | 59560899 | KD2-H4K8ac_peak_14259 | 4.37809  | RNF152_ENSG00000176641                             |
| 18 | 59561237 | 59562160 | KD2-H4K8ac_peak_14260 | 16.07006 | RNF152_ENSG00000176641                             |
| 18 | 59854712 | 59855039 | KD2-H4K8ac_peak_14261 | 5.92591  | PIGN_ENSG00000197563;KIAA1468_ENSG00000134444      |
| 18 | 60189619 | 60189967 | KD2-H4K8ac_peak_14262 | 7.40111  | ZCCHC2_ENSG00000141664                             |
| 18 | 60190968 | 60191607 | KD2-H4K8ac_peak_14263 | 7.27716  | ZCCHC2_ENSG00000141664                             |
| 18 | 60193758 | 60194018 | KD2-H4K8ac_peak_14264 | 19.88671 |                                                    |
| 18 | 60331378 | 60331650 | KD2-H4K8ac_peak_14265 | 6.16888  |                                                    |
| 18 | 60381914 | 60382124 | KD2-H4K8ac_peak_14266 | 5.29555  | PHLPP1_ENSG00000081913                             |
| 18 | 60756384 | 60756706 | KD2-H4K8ac_peak_14267 | 7.72801  |                                                    |
| 18 | 60758272 | 60758550 | KD2-H4K8ac_peak_14268 | 12.60983 |                                                    |
| 18 | 60809870 | 60810729 | KD2-H4K8ac_peak_14269 | 6.64891  |                                                    |
| 18 | 60986670 | 60988539 | KD2-H4K8ac_peak_14270 | 8.85813  | BCL2_ENSG00000171791                               |
| 18 | 61035149 | 61035560 | KD2-H4K8ac_peak_14271 | 11.54737 | KDSR_ENSG00000119537;RP11-635N19.1_ENSG00000267390 |
| 18 | 61090020 | 61090328 | KD2-H4K8ac_peak_14272 | 15.81711 | VPS4B_ENSG00000119541                              |
| 18 | 61603750 | 61604156 | KD2-H4K8ac_peak_14273 | 9.07715  |                                                    |
| 18 | 61616602 | 61617008 | KD2-H4K8ac_peak_14274 | 6.64891  | HMSD_ENSG00000221887                               |
| 18 | 61637116 | 61637666 | KD2-H4K8ac_peak_14275 | 16.49944 | SERPINB8_ENSG00000166401                           |
| 18 | 61638067 | 61638384 | KD2-H4K8ac_peak_14276 | 16.25886 | SERPINB8_ENSG00000166401                           |
| 18 | 63144320 | 63144523 | KD2-H4K8ac_peak_14277 | 6.16888  |                                                    |
| 18 | 63417841 | 63418278 | KD2-H4K8ac_peak_14278 | 7.27716  | CDH7_ENSG00000081138                               |
| 18 | 65176030 | 65176714 | KD2-H4K8ac_peak_14279 | 8.1233   |                                                    |
| 18 | 66381876 | 66382268 | KD2-H4K8ac_peak_14280 | 14.00658 | TMX3_ENSG00000166479;CCDC102B_ENSG00000150636      |
| 18 | 67067780 | 67068529 | KD2-H4K8ac_peak_14281 | 7.49599  | DOK6_ENSG00000206052                               |
| 18 | 67872686 | 67873122 | KD2-H4K8ac_peak_14282 | 10.46264 | RTTN_ENSG00000176225                               |
| 18 | 67873584 | 67873898 | KD2-H4K8ac_peak_14283 | 4.59928  | RTTN_ENSG00000176225                               |
| 18 | 67955681 | 67957045 | KD2-H4K8ac_peak_14284 | 24.051   | SOCS6_ENSG00000170677                              |
| 18 | 67963634 | 67963851 | KD2-H4K8ac_peak_14285 | 5.6755   |                                                    |
| 18 | 68083153 | 68083971 | KD2-H4K8ac_peak_14286 | 10.94087 |                                                    |
| 18 | 68135844 | 68136160 | KD2-H4K8ac_peak_14287 | 12.38154 |                                                    |
| 18 | 68138331 | 68138653 | KD2-H4K8ac_peak_14288 | 5.54647  |                                                    |
| 18 | 68266591 | 68266905 | KD2-H4K8ac_peak_14289 | 10.21502 |                                                    |
| 18 | 68650197 | 68650440 | KD2-H4K8ac_peak_14290 | 4.76709  |                                                    |
| 18 | 68695005 | 68695819 | KD2-H4K8ac_peak_14291 | 4.91674  | RP11-529J17.1_ENSG00000265639                      |
| 18 | 68696149 | 68696901 | KD2-H4K8ac_peak_14292 | 12.88108 | RP11-529J17.1_ENSG00000265639                      |
| 18 | 69566930 | 69567353 | KD2-H4K8ac_peak_14293 | 9.36516  |                                                    |
| 18 | 70209386 | 70209695 | KD2-H4K8ac_peak_14294 | 5.92591  |                                                    |
| 18 | 70210445 | 70210656 | KD2-H4K8ac_peak_14295 | 6.94255  |                                                    |
| 18 | 70210889 | 70211172 | KD2-H4K8ac_peak_14296 | 12.38154 |                                                    |
| 18 | 71814826 | 71815519 | KD2-H4K8ac_peak_14297 | 12.88108 | FBXO15_ENSG00000141665;TIMM21_ENSG00000075336      |
| 18 | 71922575 | 71923013 | KD2-H4K8ac_peak_14298 | 5.88845  |                                                    |
| 18 | 71924776 | 71925098 | KD2-H4K8ac_peak_14299 | 4.42765  |                                                    |
| 18 | 71936862 | 71937405 | KD2-H4K8ac_peak_14300 | 9.63776  |                                                    |
| 18 | 71946224 | 71946751 | KD2-H4K8ac_peak_14301 | 7.45501  |                                                    |
| 18 | 72162880 | 72163224 | KD2-H4K8ac_peak_14302 | 8.28994  | CNDP2_ENSG00000133313                              |
| 18 | 72163839 | 72164099 | KD2-H4K8ac_peak_14303 | 10.96455 | CNDP2_ENSG00000133313                              |
| 18 | 72264465 | 72264732 | KD2-H4K8ac_peak_14304 | 6.25869  | ZNF407_ENSG00000215421                             |

|    |          |          |                       |          |                                                                           |
|----|----------|----------|-----------------------|----------|---------------------------------------------------------------------------|
| 18 | 72264966 | 72265189 | KD2-H4K8ac_peak_14305 | 4.20044  | LINC00909_ENSG00000264247;ZNF407_ENSG00000215421                          |
| 18 | 72265390 | 72266047 | KD2-H4K8ac_peak_14306 | 17.16047 | LINC00909_ENSG00000264247;ZNF407_ENSG00000215421                          |
| 18 | 72515100 | 72515338 | KD2-H4K8ac_peak_14307 | 6.31143  |                                                                           |
| 18 | 72837284 | 72838203 | KD2-H4K8ac_peak_14308 | 21.11201 |                                                                           |
| 18 | 72920780 | 72921054 | KD2-H4K8ac_peak_14309 | 12.00597 | ZADH2_ENSG00000180011                                                     |
| 18 | 72921268 | 72921857 | KD2-H4K8ac_peak_14310 | 12.2054  | ZADH2_ENSG00000180011;TSHZ1_ENSG00000179981                               |
| 18 | 72923742 | 72924076 | KD2-H4K8ac_peak_14311 | 24.94195 |                                                                           |
| 18 | 72956479 | 72956894 | KD2-H4K8ac_peak_14312 | 15.64848 |                                                                           |
| 18 | 72957433 | 72958080 | KD2-H4K8ac_peak_14313 | 6.2159   |                                                                           |
| 18 | 72959093 | 72959319 | KD2-H4K8ac_peak_14314 | 6.31143  |                                                                           |
| 18 | 72961023 | 72961332 | KD2-H4K8ac_peak_14315 | 10.87093 |                                                                           |
| 18 | 73627872 | 73628603 | KD2-H4K8ac_peak_14316 | 14.74047 |                                                                           |
| 18 | 74162985 | 74163496 | KD2-H4K8ac_peak_14317 | 7.59643  |                                                                           |
| 18 | 74207403 | 74207820 | KD2-H4K8ac_peak_14318 | 6.66692  | ZNF516_ENSG00000101493;RP11-17M16.1_ENSG00000220032                       |
| 18 | 74499418 | 74499740 | KD2-H4K8ac_peak_14319 | 5.43522  |                                                                           |
| 18 | 74513820 | 74514134 | KD2-H4K8ac_peak_14320 | 8.23274  |                                                                           |
| 18 | 74533781 | 74534655 | KD2-H4K8ac_peak_14321 | 15.03918 | RP11-162A12.2_ENSG00000264278;ZNF236_ENSG00000130856                      |
| 18 | 74534937 | 74535377 | KD2-H4K8ac_peak_14322 | 17.8868  | RP11-162A12.2_ENSG00000264278;ZNF236_ENSG00000130856                      |
| 18 | 74535670 | 74535973 | KD2-H4K8ac_peak_14323 | 4.06758  |                                                                           |
| 18 | 76828573 | 76829141 | KD2-H4K8ac_peak_14324 | 17.8868  | ATP9B_ENSG00000166377                                                     |
| 18 | 76829569 | 76829799 | KD2-H4K8ac_peak_14325 | 5.54647  | ATP9B_ENSG00000166377                                                     |
| 18 | 76981370 | 76981617 | KD2-H4K8ac_peak_14326 | 5.10276  |                                                                           |
| 18 | 77010899 | 77011317 | KD2-H4K8ac_peak_14327 | 7.12754  |                                                                           |
| 18 | 77438735 | 77439242 | KD2-H4K8ac_peak_14328 | 12.99417 | RP11-567M16.3_ENSG00000178412;CTDP1_ENSG00000060069                       |
| 18 | 77711815 | 77712510 | KD2-H4K8ac_peak_14329 | 10.19949 | PQLC1_ENSG00000122490                                                     |
| 18 | 77724152 | 77724759 | KD2-H4K8ac_peak_14330 | 11.05407 | HSBP1L1_ENSG00000226742                                                   |
| 18 | 77748088 | 77748503 | KD2-H4K8ac_peak_14331 | 16.07006 |                                                                           |
| 18 | 77748711 | 77749336 | KD2-H4K8ac_peak_14332 | 11.2938  |                                                                           |
| 18 | 77793348 | 77793712 | KD2-H4K8ac_peak_14333 | 6.65673  | TXNL4A_ENSG00000141759;RP11-795F19.5_ENSG00000267127;RBFA_ENSG00000101546 |
| 18 | 77794495 | 77794768 | KD2-H4K8ac_peak_14334 | 6.66692  | TXNL4A_ENSG00000141759;RP11-795F19.5_ENSG00000267127;RBFA_ENSG00000101546 |
| 18 | 77866014 | 77866349 | KD2-H4K8ac_peak_14335 | 10.0746  | ADNP2_ENSG00000101544                                                     |
| 18 | 77866920 | 77867379 | KD2-H4K8ac_peak_14336 | 21.96198 | ADNP2_ENSG00000101544                                                     |
| 18 | 78004049 | 78004277 | KD2-H4K8ac_peak_14337 | 8.09303  |                                                                           |
| 18 | 78005099 | 78005295 | KD2-H4K8ac_peak_14338 | 6.65673  | PARD6G_ENSG00000178184                                                    |
| 19 | 290513   | 291272   | KD2-H4K8ac_peak_14339 | 10.7186  | PPAP2C_ENSG00000141934                                                    |
| 19 | 291728   | 292209   | KD2-H4K8ac_peak_14340 | 12.99417 | PPAP2C_ENSG00000141934                                                    |
| 19 | 344152   | 345449   | KD2-H4K8ac_peak_14341 | 11.89502 | MIER2_ENSG00000105556                                                     |
| 19 | 402229   | 402876   | KD2-H4K8ac_peak_14342 | 14.15075 |                                                                           |
| 19 | 408715   | 409464   | KD2-H4K8ac_peak_14343 | 10.17341 | C2CD4C_ENSG00000183186                                                    |
| 19 | 448192   | 448430   | KD2-H4K8ac_peak_14344 | 8.30974  |                                                                           |
| 19 | 460039   | 461248   | KD2-H4K8ac_peak_14345 | 9.96798  | SHC2_ENSG00000129946                                                      |
| 19 | 480072   | 480311   | KD2-H4K8ac_peak_14346 | 11.66127 |                                                                           |
| 19 | 483452   | 483727   | KD2-H4K8ac_peak_14347 | 5.88845  |                                                                           |
| 19 | 488100   | 488898   | KD2-H4K8ac_peak_14348 | 7.36799  | MADCAM1_ENSG00000099866                                                   |
| 19 | 506398   | 507045   | KD2-H4K8ac_peak_14349 | 12.08081 | AC005775.2_ENSG00000266933;TPGS1_ENSG00000141933                          |
| 19 | 507567   | 507768   | KD2-H4K8ac_peak_14350 | 6.76298  | AC005775.2_ENSG00000266933;TPGS1_ENSG00000141933                          |

|    |         |         |                       |          |                                                   |
|----|---------|---------|-----------------------|----------|---------------------------------------------------|
| 19 | 524105  | 524667  | KD2-H4K8ac_peak_14351 | 12.84642 |                                                   |
| 19 | 530339  | 530707  | KD2-H4K8ac_peak_14352 | 7.14562  |                                                   |
| 19 | 531221  | 531538  | KD2-H4K8ac_peak_14353 | 10.46874 | CDC34_ENSG00000099804                             |
| 19 | 531826  | 532103  | KD2-H4K8ac_peak_14354 | 4.67342  | CDC34_ENSG00000099804                             |
| 19 | 572656  | 572994  | KD2-H4K8ac_peak_14355 | 14.99078 | AC009005.2_ENSG00000267751                        |
| 19 | 588348  | 588837  | KD2-H4K8ac_peak_14356 | 5.57044  |                                                   |
| 19 | 589132  | 589726  | KD2-H4K8ac_peak_14357 | 9.72244  | HCN2_ENSG00000099822                              |
| 19 | 609154  | 609805  | KD2-H4K8ac_peak_14358 | 7.96322  |                                                   |
| 19 | 610882  | 611596  | KD2-H4K8ac_peak_14359 | 15.25274 |                                                   |
| 19 | 633112  | 633457  | KD2-H4K8ac_peak_14360 | 5.53033  | POLRMT_ENSG00000099821                            |
| 19 | 634126  | 634385  | KD2-H4K8ac_peak_14361 | 7.38933  | POLRMT_ENSG00000099821                            |
| 19 | 662815  | 663074  | KD2-H4K8ac_peak_14362 | 5.66705  | RNF126_ENSG00000070423;AC004156.3_ENSG00000267666 |
| 19 | 663491  | 663952  | KD2-H4K8ac_peak_14363 | 11.05467 | RNF126_ENSG00000070423;AC004156.3_ENSG00000267666 |
| 19 | 679361  | 680290  | KD2-H4K8ac_peak_14364 | 11.9948  |                                                   |
| 19 | 694948  | 695294  | KD2-H4K8ac_peak_14365 | 6.07178  | PRSS57_ENSG00000185198                            |
| 19 | 708191  | 708742  | KD2-H4K8ac_peak_14366 | 10.76768 | PALM_ENSG00000099864                              |
| 19 | 709081  | 709299  | KD2-H4K8ac_peak_14367 | 9.07715  | PALM_ENSG00000099864                              |
| 19 | 709636  | 710497  | KD2-H4K8ac_peak_14368 | 10.21366 | PALM_ENSG00000099864                              |
| 19 | 719539  | 719832  | KD2-H4K8ac_peak_14369 | 9.11031  |                                                   |
| 19 | 720878  | 721249  | KD2-H4K8ac_peak_14370 | 4.67342  |                                                   |
| 19 | 778812  | 779120  | KD2-H4K8ac_peak_14371 | 3.75035  |                                                   |
| 19 | 787583  | 787893  | KD2-H4K8ac_peak_14372 | 5.82799  | AC006273.7_ENSG00000266927                        |
| 19 | 788712  | 790035  | KD2-H4K8ac_peak_14373 | 16.5604  |                                                   |
| 19 | 792115  | 792471  | KD2-H4K8ac_peak_14374 | 6.55245  |                                                   |
| 19 | 796434  | 796958  | KD2-H4K8ac_peak_14375 | 18.33962 | PTBP1_ENSG00000011304                             |
| 19 | 797450  | 797717  | KD2-H4K8ac_peak_14376 | 22.12955 | PTBP1_ENSG00000011304                             |
| 19 | 821306  | 822895  | KD2-H4K8ac_peak_14377 | 16.64426 | LPPR3_ENSG00000129951                             |
| 19 | 892382  | 892657  | KD2-H4K8ac_peak_14378 | 4.86324  | MED16_ENSG00000175221;RNU6-9_ENSG00000207507      |
| 19 | 892955  | 893175  | KD2-H4K8ac_peak_14379 | 17.76093 | MED16_ENSG00000175221;RNU6-9_ENSG00000207507      |
| 19 | 893691  | 894301  | KD2-H4K8ac_peak_14380 | 5.65802  | MED16_ENSG00000175221;RNU6-9_ENSG00000207507      |
| 19 | 913284  | 913793  | KD2-H4K8ac_peak_14381 | 8.86099  | R3HDM4_ENSG00000198858                            |
| 19 | 916950  | 917384  | KD2-H4K8ac_peak_14382 | 6.85193  | KISS1R_ENSG00000116014                            |
| 19 | 924803  | 925911  | KD2-H4K8ac_peak_14383 | 16.61426 | ARID3A_ENSG00000116017                            |
| 19 | 926287  | 926811  | KD2-H4K8ac_peak_14384 | 7.69287  | ARID3A_ENSG00000116017                            |
| 19 | 927081  | 927469  | KD2-H4K8ac_peak_14385 | 7.57979  |                                                   |
| 19 | 932570  | 933274  | KD2-H4K8ac_peak_14386 | 10.30284 |                                                   |
| 19 | 933509  | 933784  | KD2-H4K8ac_peak_14387 | 20.70767 |                                                   |
| 19 | 934515  | 935330  | KD2-H4K8ac_peak_14388 | 6.82618  |                                                   |
| 19 | 940396  | 940833  | KD2-H4K8ac_peak_14389 | 10.7186  |                                                   |
| 19 | 941227  | 941450  | KD2-H4K8ac_peak_14390 | 8.10216  |                                                   |
| 19 | 945360  | 945758  | KD2-H4K8ac_peak_14391 | 6.85193  |                                                   |
| 19 | 956520  | 956844  | KD2-H4K8ac_peak_14392 | 5.73016  |                                                   |
| 19 | 983730  | 984858  | KD2-H4K8ac_peak_14393 | 17.75427 | WDR18_ENSG00000065268                             |
| 19 | 1020605 | 1021067 | KD2-H4K8ac_peak_14394 | 9.08816  | TMEM259_ENSG00000182087;RNU6-2_ENSG00000207357    |
| 19 | 1026235 | 1026470 | KD2-H4K8ac_peak_14395 | 8.79106  | CNN2_ENSG00000064666                              |
| 19 | 1026813 | 1027214 | KD2-H4K8ac_peak_14396 | 7.51054  | CNN2_ENSG00000064666                              |

|    |         |         |                       |          |                                                     |
|----|---------|---------|-----------------------|----------|-----------------------------------------------------|
| 19 | 1027800 | 1028481 | KD2-H4K8ac_peak_14397 | 15.10495 |                                                     |
| 19 | 1028812 | 1029074 | KD2-H4K8ac_peak_14398 | 11.05407 |                                                     |
| 19 | 1074491 | 1074742 | KD2-H4K8ac_peak_14399 | 9.20193  |                                                     |
| 19 | 1095617 | 1096260 | KD2-H4K8ac_peak_14400 | 8.28234  | POLR2E_ENSG00000099817                              |
| 19 | 1104164 | 1104362 | KD2-H4K8ac_peak_14401 | 8.16133  | GPX4_ENSG00000167468                                |
| 19 | 1104564 | 1104889 | KD2-H4K8ac_peak_14402 | 9.73431  | GPX4_ENSG00000167468                                |
| 19 | 1170197 | 1170519 | KD2-H4K8ac_peak_14403 | 6.0073   |                                                     |
| 19 | 1173149 | 1173351 | KD2-H4K8ac_peak_14404 | 4.84794  | SBNO2_ENSG00000064932                               |
| 19 | 1174452 | 1174812 | KD2-H4K8ac_peak_14405 | 10.72313 | SBNO2_ENSG00000064932                               |
| 19 | 1180271 | 1180568 | KD2-H4K8ac_peak_14406 | 7.5554   |                                                     |
| 19 | 1194158 | 1194503 | KD2-H4K8ac_peak_14407 | 11.2938  |                                                     |
| 19 | 1205243 | 1205487 | KD2-H4K8ac_peak_14408 | 14.06758 |                                                     |
| 19 | 1237047 | 1237893 | KD2-H4K8ac_peak_14409 | 13.70753 | C19orf26_ENSG00000099625;AC004221.2_ENSG00000267778 |
| 19 | 1238163 | 1238587 | KD2-H4K8ac_peak_14410 | 6.50882  | C19orf26_ENSG00000099625;AC004221.2_ENSG00000267778 |
| 19 | 1239751 | 1240276 | KD2-H4K8ac_peak_14411 | 11.92978 |                                                     |
| 19 | 1241817 | 1242110 | KD2-H4K8ac_peak_14412 | 13.80019 | ATP5D_ENSG00000099624                               |
| 19 | 1248095 | 1248404 | KD2-H4K8ac_peak_14413 | 4.06758  | MIDN_ENSG00000167470                                |
| 19 | 1248670 | 1248878 | KD2-H4K8ac_peak_14414 | 6.97919  | MIDN_ENSG00000167470                                |
| 19 | 1249099 | 1249593 | KD2-H4K8ac_peak_14415 | 26.43409 | MIDN_ENSG00000167470                                |
| 19 | 1249999 | 1251227 | KD2-H4K8ac_peak_14416 | 9.36516  |                                                     |
| 19 | 1251503 | 1252187 | KD2-H4K8ac_peak_14417 | 6.40297  |                                                     |
| 19 | 1252561 | 1252930 | KD2-H4K8ac_peak_14418 | 10.7679  |                                                     |
| 19 | 1260317 | 1260827 | KD2-H4K8ac_peak_14419 | 11.80283 | CIRBP_ENSG00000099622                               |
| 19 | 1261177 | 1261405 | KD2-H4K8ac_peak_14420 | 8.67843  |                                                     |
| 19 | 1266764 | 1267050 | KD2-H4K8ac_peak_14421 | 6.04107  |                                                     |
| 19 | 1269317 | 1269683 | KD2-H4K8ac_peak_14422 | 26.99824 | CIRBP-AS1_ENSG00000267493                           |
| 19 | 1275117 | 1275357 | KD2-H4K8ac_peak_14423 | 10.19949 | C19orf24_ENSG00000228300                            |
| 19 | 1275551 | 1275800 | KD2-H4K8ac_peak_14424 | 18.16578 | C19orf24_ENSG00000228300                            |
| 19 | 1285312 | 1286468 | KD2-H4K8ac_peak_14425 | 11.50346 | MUM1_ENSG00000160953;EFNA2_ENSG00000099617          |
| 19 | 1315708 | 1316542 | KD2-H4K8ac_peak_14426 | 8.10216  |                                                     |
| 19 | 1324993 | 1325285 | KD2-H4K8ac_peak_14427 | 5.66705  |                                                     |
| 19 | 1325484 | 1325921 | KD2-H4K8ac_peak_14428 | 9.402    |                                                     |
| 19 | 1331686 | 1332041 | KD2-H4K8ac_peak_14429 | 4.86324  |                                                     |
| 19 | 1350225 | 1350570 | KD2-H4K8ac_peak_14430 | 5.13893  |                                                     |
| 19 | 1354081 | 1354755 | KD2-H4K8ac_peak_14431 | 24.23147 |                                                     |
| 19 | 1355053 | 1355361 | KD2-H4K8ac_peak_14432 | 8.55271  |                                                     |
| 19 | 1383927 | 1384334 | KD2-H4K8ac_peak_14433 | 12.93209 | NDUFS7_ENSG00000115286                              |
| 19 | 1400761 | 1401973 | KD2-H4K8ac_peak_14434 | 15.50259 | GAMT_ENSG00000130005                                |
| 19 | 1407666 | 1408280 | KD2-H4K8ac_peak_14435 | 12.10889 | DAZAP1_ENSG00000071626                              |
| 19 | 1444919 | 1445203 | KD2-H4K8ac_peak_14436 | 10.0089  |                                                     |
| 19 | 1445407 | 1445859 | KD2-H4K8ac_peak_14437 | 9.95119  | APC2_ENSG00000115266                                |
| 19 | 1446297 | 1446781 | KD2-H4K8ac_peak_14438 | 3.97079  | APC2_ENSG00000115266                                |
| 19 | 1449254 | 1449866 | KD2-H4K8ac_peak_14439 | 10.19723 |                                                     |
| 19 | 1450240 | 1450544 | KD2-H4K8ac_peak_14440 | 6.35843  |                                                     |
| 19 | 1478555 | 1478893 | KD2-H4K8ac_peak_14441 | 5.54647  | C19orf25_ENSG00000119559                            |
| 19 | 1479399 | 1479997 | KD2-H4K8ac_peak_14442 | 6.66359  | C19orf25_ENSG00000119559                            |

|    |         |         |                       |          |                                               |
|----|---------|---------|-----------------------|----------|-----------------------------------------------|
| 19 | 1480205 | 1480455 | KD2-H4K8ac_peak_14443 | 7.42204  | C19orf25_ENSG00000119559                      |
| 19 | 1489688 | 1490256 | KD2-H4K8ac_peak_14444 | 5.64429  | PCSK4_ENSG00000115257;REEP6_ENSG00000115255   |
| 19 | 1491227 | 1491531 | KD2-H4K8ac_peak_14445 | 7.98621  | PCSK4_ENSG00000115257;REEP6_ENSG00000115255   |
| 19 | 1507252 | 1507720 | KD2-H4K8ac_peak_14446 | 10.05606 | CTB-25B13.9_ENSG00000267092                   |
| 19 | 1507976 | 1508171 | KD2-H4K8ac_peak_14447 | 7.27716  | CTB-25B13.9_ENSG00000267092                   |
| 19 | 1566814 | 1567678 | KD2-H4K8ac_peak_14448 | 12.96152 | MEX3D_ENSG00000181588                         |
| 19 | 1591366 | 1592289 | KD2-H4K8ac_peak_14449 | 12.30509 | MBD3_ENSG00000071655                          |
| 19 | 1592484 | 1592764 | KD2-H4K8ac_peak_14450 | 18.82114 | MBD3_ENSG00000071655                          |
| 19 | 1593118 | 1593532 | KD2-H4K8ac_peak_14451 | 7.4599   | MBD3_ENSG00000071655                          |
| 19 | 1604958 | 1605394 | KD2-H4K8ac_peak_14452 | 10.46264 | UQCR11_ENSG00000267059;UQCR11_ENSG00000127540 |
| 19 | 1605733 | 1606614 | KD2-H4K8ac_peak_14453 | 9.1707   | UQCR11_ENSG00000267059;UQCR11_ENSG00000127540 |
| 19 | 1651254 | 1652356 | KD2-H4K8ac_peak_14454 | 14.15075 | TCF3_ENSG00000071564                          |
| 19 | 1652674 | 1652917 | KD2-H4K8ac_peak_14455 | 26.96144 | TCF3_ENSG00000071564                          |
| 19 | 1653212 | 1653421 | KD2-H4K8ac_peak_14456 | 14.22723 | TCF3_ENSG00000071564                          |
| 19 | 1672198 | 1672466 | KD2-H4K8ac_peak_14457 | 10.96455 |                                               |
| 19 | 1725322 | 1725665 | KD2-H4K8ac_peak_14458 | 8.86099  |                                               |
| 19 | 1725907 | 1726219 | KD2-H4K8ac_peak_14459 | 9.96798  |                                               |
| 19 | 1795999 | 1796366 | KD2-H4K8ac_peak_14460 | 12.84642 |                                               |
| 19 | 1811862 | 1812223 | KD2-H4K8ac_peak_14461 | 11.05407 | ATP8B3_ENSG00000130270                        |
| 19 | 1847904 | 1848734 | KD2-H4K8ac_peak_14462 | 12.08081 | REXO1_ENSG00000079313                         |
| 19 | 1854980 | 1855260 | KD2-H4K8ac_peak_14463 | 6.99815  |                                               |
| 19 | 1855650 | 1855856 | KD2-H4K8ac_peak_14464 | 5.01002  |                                               |
| 19 | 1873328 | 1874096 | KD2-H4K8ac_peak_14465 | 5.13615  | CTB-31O20.9_ENSG00000267232                   |
| 19 | 1876491 | 1876926 | KD2-H4K8ac_peak_14466 | 18.29344 | CTB-31O20.2_ENSG00000261526                   |
| 19 | 1885780 | 1885997 | KD2-H4K8ac_peak_14467 | 12.28999 | ABHD17A_ENSG00000129968                       |
| 19 | 1904423 | 1905140 | KD2-H4K8ac_peak_14468 | 15.81711 | SCAMP4_ENSG00000227500;ADAT3_ENSG00000213638  |
| 19 | 1909923 | 1910141 | KD2-H4K8ac_peak_14469 | 4.211    |                                               |
| 19 | 1929930 | 1930261 | KD2-H4K8ac_peak_14470 | 8.17902  |                                               |
| 19 | 1940190 | 1940686 | KD2-H4K8ac_peak_14471 | 11.60101 | CSNK1G2_ENSG00000133275                       |
| 19 | 1940909 | 1941442 | KD2-H4K8ac_peak_14472 | 13.9234  | CSNK1G2_ENSG00000133275                       |
| 19 | 2015275 | 2015496 | KD2-H4K8ac_peak_14473 | 12.84642 |                                               |
| 19 | 2016220 | 2016956 | KD2-H4K8ac_peak_14474 | 6.66692  |                                               |
| 19 | 2032399 | 2032962 | KD2-H4K8ac_peak_14475 | 6.25869  |                                               |
| 19 | 2041563 | 2041971 | KD2-H4K8ac_peak_14476 | 9.048    |                                               |
| 19 | 2042498 | 2043095 | KD2-H4K8ac_peak_14477 | 9.18237  |                                               |
| 19 | 2050461 | 2050748 | KD2-H4K8ac_peak_14478 | 7.47462  | MKNK2_ENSG00000099875                         |
| 19 | 2051459 | 2052569 | KD2-H4K8ac_peak_14479 | 11.92978 | MKNK2_ENSG00000099875                         |
| 19 | 2056396 | 2056629 | KD2-H4K8ac_peak_14480 | 7.86151  |                                               |
| 19 | 2058144 | 2058379 | KD2-H4K8ac_peak_14481 | 5.13893  |                                               |
| 19 | 2059491 | 2060257 | KD2-H4K8ac_peak_14482 | 4.37809  |                                               |
| 19 | 2060483 | 2061474 | KD2-H4K8ac_peak_14483 | 24.93342 |                                               |
| 19 | 2061753 | 2062251 | KD2-H4K8ac_peak_14484 | 14.4458  |                                               |
| 19 | 2064895 | 2065186 | KD2-H4K8ac_peak_14485 | 8.08344  |                                               |
| 19 | 2096076 | 2096570 | KD2-H4K8ac_peak_14486 | 8.01338  | MOB3A_ENSG00000172081;IZUMO4_ENSG00000099840  |
| 19 | 2150822 | 2151522 | KD2-H4K8ac_peak_14487 | 7.74292  |                                               |
| 19 | 2163159 | 2163442 | KD2-H4K8ac_peak_14488 | 7.67504  | DOT1L_ENSG00000104885                         |

|    |         |         |                       |          |                                               |
|----|---------|---------|-----------------------|----------|-----------------------------------------------|
| 19 | 2180876 | 2181431 | KD2-H4K8ac_peak_14489 | 6.30229  |                                               |
| 19 | 2221723 | 2221946 | KD2-H4K8ac_peak_14490 | 3.82509  |                                               |
| 19 | 2235527 | 2236222 | KD2-H4K8ac_peak_14491 | 15.69395 | SF3A2_ENSG00000104897                         |
| 19 | 2236864 | 2237200 | KD2-H4K8ac_peak_14492 | 11.90231 | PLEKHJ1_ENSG00000104886;SF3A2_ENSG00000104897 |
| 19 | 2243083 | 2243340 | KD2-H4K8ac_peak_14493 | 5.13615  |                                               |
| 19 | 2244569 | 2244776 | KD2-H4K8ac_peak_14494 | 5.61067  |                                               |
| 19 | 2255457 | 2256352 | KD2-H4K8ac_peak_14495 | 5.9696   |                                               |
| 19 | 2256840 | 2257157 | KD2-H4K8ac_peak_14496 | 5.31717  |                                               |
| 19 | 2266441 | 2266686 | KD2-H4K8ac_peak_14497 | 6.72624  |                                               |
| 19 | 2269034 | 2269228 | KD2-H4K8ac_peak_14498 | 10.19949 | JSRP1_ENSG00000167476;OAZ1_ENSG00000104904    |
| 19 | 2282232 | 2282573 | KD2-H4K8ac_peak_14499 | 5.54647  | C19orf35_ENSG00000188305                      |
| 19 | 2294213 | 2294426 | KD2-H4K8ac_peak_14500 | 10.05606 |                                               |
| 19 | 2307830 | 2308027 | KD2-H4K8ac_peak_14501 | 8.79106  | LINGO3_ENSG00000220008                        |
| 19 | 2308262 | 2308628 | KD2-H4K8ac_peak_14502 | 8.30974  | LINGO3_ENSG00000220008                        |
| 19 | 2316176 | 2316520 | KD2-H4K8ac_peak_14503 | 6.60096  |                                               |
| 19 | 2328716 | 2329256 | KD2-H4K8ac_peak_14504 | 9.96798  | LSM7_ENSG00000130332;SPPL2B_ENSG00000005206   |
| 19 | 2427206 | 2427877 | KD2-H4K8ac_peak_14505 | 23.78494 | TIMM13_ENSG00000099800                        |
| 19 | 2428289 | 2428626 | KD2-H4K8ac_peak_14506 | 9.1707   | TIMM13_ENSG00000099800                        |
| 19 | 2456415 | 2456890 | KD2-H4K8ac_peak_14507 | 15.13261 | LMNB2_ENSG00000176619                         |
| 19 | 2461562 | 2463450 | KD2-H4K8ac_peak_14508 | 20.47312 | AC005624.2_ENSG00000267201                    |
| 19 | 2542899 | 2544390 | KD2-H4K8ac_peak_14509 | 8.55271  |                                               |
| 19 | 2579006 | 2579209 | KD2-H4K8ac_peak_14510 | 5.30799  |                                               |
| 19 | 2599370 | 2599569 | KD2-H4K8ac_peak_14511 | 8.41122  |                                               |
| 19 | 2601975 | 2602227 | KD2-H4K8ac_peak_14512 | 6.85193  |                                               |
| 19 | 2611054 | 2611265 | KD2-H4K8ac_peak_14513 | 9.55262  | CTC-265F19.2_ENSG00000267412                  |
| 19 | 2721108 | 2722093 | KD2-H4K8ac_peak_14514 | 11.33854 | DIRAS1_ENSG00000176490                        |
| 19 | 2749038 | 2749360 | KD2-H4K8ac_peak_14515 | 4.211    |                                               |
| 19 | 2782947 | 2783248 | KD2-H4K8ac_peak_14516 | 12.14337 | SGTA_ENSG00000104969                          |
| 19 | 2785571 | 2785852 | KD2-H4K8ac_peak_14517 | 11.19034 | THOP1_ENSG00000172009                         |
| 19 | 2819909 | 2820231 | KD2-H4K8ac_peak_14518 | 12.82393 | ZNF554_ENSG00000172006                        |
| 19 | 2840557 | 2841170 | KD2-H4K8ac_peak_14519 | 10.43145 | ZNF555_ENSG00000186300                        |
| 19 | 2841543 | 2841931 | KD2-H4K8ac_peak_14520 | 5.4779   | ZNF555_ENSG00000186300                        |
| 19 | 2867344 | 2867543 | KD2-H4K8ac_peak_14521 | 9.02371  | ZNF556_ENSG00000172000                        |
| 19 | 2899949 | 2900148 | KD2-H4K8ac_peak_14522 | 4.67342  | ZNF57_ENSG00000171970                         |
| 19 | 2945273 | 2945793 | KD2-H4K8ac_peak_14523 | 8.85813  | ZNF77_ENSG00000175691                         |
| 19 | 2977572 | 2977856 | KD2-H4K8ac_peak_14524 | 10.08707 | TLE6_ENSG00000104953                          |
| 19 | 2982580 | 2982915 | KD2-H4K8ac_peak_14525 | 10.21366 |                                               |
| 19 | 2983238 | 2983700 | KD2-H4K8ac_peak_14526 | 10.17486 |                                               |
| 19 | 2986867 | 2987102 | KD2-H4K8ac_peak_14527 | 8.5092   |                                               |
| 19 | 3035191 | 3035487 | KD2-H4K8ac_peak_14528 | 6.05809  |                                               |
| 19 | 3061105 | 3061797 | KD2-H4K8ac_peak_14529 | 7.76104  |                                               |
| 19 | 3062601 | 3063081 | KD2-H4K8ac_peak_14530 | 8.86099  | AES_ENSG00000104964                           |
| 19 | 3067665 | 3068003 | KD2-H4K8ac_peak_14531 | 14.48084 |                                               |
| 19 | 3093474 | 3094093 | KD2-H4K8ac_peak_14532 | 13.80019 | GNA11_ENSG00000088256                         |
| 19 | 3109502 | 3109719 | KD2-H4K8ac_peak_14533 | 6.06203  |                                               |
| 19 | 3184410 | 3185073 | KD2-H4K8ac_peak_14534 | 11.05467 | NCLN_ENSG00000125912                          |



|    |         |         |                       |          |                                                   |
|----|---------|---------|-----------------------|----------|---------------------------------------------------|
| 19 | 3186011 | 3186237 | KD2-H4K8ac_peak_14535 | 5.30799  | NCLN_ENSG00000125912                              |
| 19 | 3224711 | 3224990 | KD2-H4K8ac_peak_14536 | 10.68173 | CELF5_ENSG00000161082                             |
| 19 | 3275701 | 3275945 | KD2-H4K8ac_peak_14537 | 5.38581  |                                                   |
| 19 | 3336738 | 3337421 | KD2-H4K8ac_peak_14538 | 10.17486 |                                                   |
| 19 | 3344012 | 3344224 | KD2-H4K8ac_peak_14539 | 9.63487  |                                                   |
| 19 | 3346166 | 3346532 | KD2-H4K8ac_peak_14540 | 4.44748  |                                                   |
| 19 | 3358602 | 3359406 | KD2-H4K8ac_peak_14541 | 9.1707   | NFIC_ENSG00000141905                              |
| 19 | 3359649 | 3360177 | KD2-H4K8ac_peak_14542 | 15.20126 | NFIC_ENSG00000141905                              |
| 19 | 3360757 | 3361352 | KD2-H4K8ac_peak_14543 | 7.07117  |                                                   |
| 19 | 3365584 | 3366276 | KD2-H4K8ac_peak_14544 | 11.70879 |                                                   |
| 19 | 3366606 | 3367975 | KD2-H4K8ac_peak_14545 | 19.25648 |                                                   |
| 19 | 3375694 | 3376247 | KD2-H4K8ac_peak_14546 | 8.02571  |                                                   |
| 19 | 3386549 | 3386932 | KD2-H4K8ac_peak_14547 | 14.16977 |                                                   |
| 19 | 3388116 | 3388378 | KD2-H4K8ac_peak_14548 | 7.11824  |                                                   |
| 19 | 3388627 | 3388865 | KD2-H4K8ac_peak_14549 | 8.96519  |                                                   |
| 19 | 3412813 | 3413019 | KD2-H4K8ac_peak_14550 | 3.75035  |                                                   |
| 19 | 3423234 | 3423922 | KD2-H4K8ac_peak_14551 | 9.16531  |                                                   |
| 19 | 3427914 | 3428728 | KD2-H4K8ac_peak_14552 | 7.79898  |                                                   |
| 19 | 3434338 | 3434835 | KD2-H4K8ac_peak_14553 | 6.76298  |                                                   |
| 19 | 3435421 | 3435767 | KD2-H4K8ac_peak_14554 | 7.76329  |                                                   |
| 19 | 3441129 | 3442553 | KD2-H4K8ac_peak_14555 | 15.58442 |                                                   |
| 19 | 3442843 | 3443097 | KD2-H4K8ac_peak_14556 | 7.96322  |                                                   |
| 19 | 3458881 | 3459129 | KD2-H4K8ac_peak_14557 | 9.70057  |                                                   |
| 19 | 3459371 | 3459635 | KD2-H4K8ac_peak_14558 | 10.65724 |                                                   |
| 19 | 3500214 | 3500868 | KD2-H4K8ac_peak_14559 | 11.04256 | DOHH_ENSG00000129932;RN7SL866P_ENSG00000264159    |
| 19 | 3501305 | 3501528 | KD2-H4K8ac_peak_14560 | 6.40683  | DOHH_ENSG00000129932;RN7SL866P_ENSG00000264159    |
| 19 | 3505453 | 3506014 | KD2-H4K8ac_peak_14561 | 14.93459 | FZR1_ENSG00000105325                              |
| 19 | 3506359 | 3507055 | KD2-H4K8ac_peak_14562 | 12.2118  | FZR1_ENSG00000105325                              |
| 19 | 3557775 | 3558064 | KD2-H4K8ac_peak_14563 | 13.70753 | AC005786.5_ENSG00000267231                        |
| 19 | 3572078 | 3572393 | KD2-H4K8ac_peak_14564 | 7.36799  | HMG20B_ENSG00000064961                            |
| 19 | 3585780 | 3585995 | KD2-H4K8ac_peak_14565 | 6.25869  | GIPC3_ENSG00000179855                             |
| 19 | 3606206 | 3606475 | KD2-H4K8ac_peak_14566 | 3.97079  | TBXA2R_ENSG00000006638;CACTIN-AS1_ENSG00000226800 |
| 19 | 3606689 | 3607825 | KD2-H4K8ac_peak_14567 | 13.73635 | TBXA2R_ENSG00000006638;CACTIN-AS1_ENSG00000226800 |
| 19 | 3626561 | 3627037 | KD2-H4K8ac_peak_14568 | 10.17341 | CACTIN_ENSG00000105298                            |
| 19 | 3665698 | 3666168 | KD2-H4K8ac_peak_14569 | 6.72624  |                                                   |
| 19 | 3700176 | 3700409 | KD2-H4K8ac_peak_14570 | 9.43685  | PIP5K1C_ENSG00000186111                           |
| 19 | 3761539 | 3762008 | KD2-H4K8ac_peak_14571 | 5.54647  | APBA3_ENSG0000011132;MRPL54_ENSG00000183617       |
| 19 | 3762665 | 3762908 | KD2-H4K8ac_peak_14572 | 13.9234  | APBA3_ENSG0000011132;MRPL54_ENSG00000183617       |
| 19 | 3826041 | 3826237 | KD2-H4K8ac_peak_14573 | 6.25014  |                                                   |
| 19 | 3970695 | 3971034 | KD2-H4K8ac_peak_14574 | 12.74171 | DAPK3_ENSG00000167657                             |
| 19 | 3971386 | 3971670 | KD2-H4K8ac_peak_14575 | 10.21366 | DAPK3_ENSG00000167657                             |
| 19 | 3984950 | 3985222 | KD2-H4K8ac_peak_14576 | 5.88845  | EEF2_ENSG00000167658                              |
| 19 | 3986570 | 3986978 | KD2-H4K8ac_peak_14577 | 4.42765  |                                                   |
| 19 | 3990487 | 3990873 | KD2-H4K8ac_peak_14578 | 5.30799  |                                                   |
| 19 | 3991142 | 3991570 | KD2-H4K8ac_peak_14579 | 7.0983   |                                                   |
| 19 | 4007758 | 4008123 | KD2-H4K8ac_peak_14580 | 16.61426 | PIAS4_ENSG00000105229                             |

|    |         |         |                       |          |                                                   |
|----|---------|---------|-----------------------|----------|---------------------------------------------------|
| 19 | 4014433 | 4014933 | KD2-H4K8ac_peak_14581 | 6.94249  |                                                   |
| 19 | 4015452 | 4015880 | KD2-H4K8ac_peak_14582 | 6.60094  |                                                   |
| 19 | 4066265 | 4066816 | KD2-H4K8ac_peak_14583 | 16.8435  | ZBTB7A_ENSG00000178951                            |
| 19 | 4067146 | 4067812 | KD2-H4K8ac_peak_14584 | 10.43145 | ZBTB7A_ENSG00000178951                            |
| 19 | 4123717 | 4124076 | KD2-H4K8ac_peak_14585 | 10.33529 | MAP2K2_ENSG00000126934                            |
| 19 | 4124316 | 4124508 | KD2-H4K8ac_peak_14586 | 7.47462  | MAP2K2_ENSG00000126934                            |
| 19 | 4139834 | 4140305 | KD2-H4K8ac_peak_14587 | 5.43522  |                                                   |
| 19 | 4140598 | 4140878 | KD2-H4K8ac_peak_14588 | 4.01115  |                                                   |
| 19 | 4181953 | 4182493 | KD2-H4K8ac_peak_14589 | 8.16906  | SIRT6_ENSG00000077463;ANKRD24_ENSG00000089847     |
| 19 | 4224188 | 4224628 | KD2-H4K8ac_peak_14590 | 7.01658  |                                                   |
| 19 | 4246368 | 4246780 | KD2-H4K8ac_peak_14591 | 14.56955 | CCDC94_ENSG00000105248                            |
| 19 | 4276660 | 4277316 | KD2-H4K8ac_peak_14592 | 9.73431  |                                                   |
| 19 | 4277689 | 4278459 | KD2-H4K8ac_peak_14593 | 12.36441 | SHD_ENSG00000105251                               |
| 19 | 4278779 | 4280445 | KD2-H4K8ac_peak_14594 | 21.6161  | SHD_ENSG00000105251                               |
| 19 | 4291243 | 4291670 | KD2-H4K8ac_peak_14595 | 8.49564  |                                                   |
| 19 | 4301357 | 4301555 | KD2-H4K8ac_peak_14596 | 5.58324  | TMIGD2_ENSG00000167664                            |
| 19 | 4302213 | 4302978 | KD2-H4K8ac_peak_14597 | 5.54647  | TMIGD2_ENSG00000167664                            |
| 19 | 4304280 | 4304495 | KD2-H4K8ac_peak_14598 | 7.27716  | FSD1_ENSG00000105255                              |
| 19 | 4327051 | 4327260 | KD2-H4K8ac_peak_14599 | 8.83582  |                                                   |
| 19 | 4328725 | 4329052 | KD2-H4K8ac_peak_14600 | 11.89502 |                                                   |
| 19 | 4342176 | 4342677 | KD2-H4K8ac_peak_14601 | 29.1888  | STAP2_ENSG00000178078;MPND_ENSG00000008382        |
| 19 | 4343096 | 4343407 | KD2-H4K8ac_peak_14602 | 14.98936 | STAP2_ENSG00000178078;MPND_ENSG00000008382        |
| 19 | 4352809 | 4353185 | KD2-H4K8ac_peak_14603 | 10.0692  | AC007292.4_ENSG000000269807                       |
| 19 | 4373197 | 4373528 | KD2-H4K8ac_peak_14604 | 6.25869  |                                                   |
| 19 | 4374297 | 4375145 | KD2-H4K8ac_peak_14605 | 7.92775  |                                                   |
| 19 | 4402685 | 4403137 | KD2-H4K8ac_peak_14606 | 17.27647 | CHAF1A_ENSG00000167670                            |
| 19 | 4458258 | 4458527 | KD2-H4K8ac_peak_14607 | 6.40297  | UBXN6_ENSG00000167671                             |
| 19 | 4474907 | 4475191 | KD2-H4K8ac_peak_14608 | 11.05467 |                                                   |
| 19 | 4556117 | 4556340 | KD2-H4K8ac_peak_14609 | 5.14125  |                                                   |
| 19 | 4557028 | 4557254 | KD2-H4K8ac_peak_14610 | 10.21366 |                                                   |
| 19 | 4584243 | 4584845 | KD2-H4K8ac_peak_14611 | 9.57101  |                                                   |
| 19 | 4635985 | 4636670 | KD2-H4K8ac_peak_14612 | 21.60954 |                                                   |
| 19 | 4638435 | 4638731 | KD2-H4K8ac_peak_14613 | 9.96798  | TNFAIP8L1_ENSG00000185361                         |
| 19 | 4669799 | 4670309 | KD2-H4K8ac_peak_14614 | 11.1952  | C19orf10_ENSG00000074842                          |
| 19 | 4723349 | 4723745 | KD2-H4K8ac_peak_14615 | 11.51672 | DPP9_ENSG00000142002                              |
| 19 | 4738349 | 4738712 | KD2-H4K8ac_peak_14616 | 7.70289  |                                                   |
| 19 | 4742258 | 4742563 | KD2-H4K8ac_peak_14617 | 5.14125  |                                                   |
| 19 | 4742787 | 4743834 | KD2-H4K8ac_peak_14618 | 7.76104  |                                                   |
| 19 | 4791918 | 4792612 | KD2-H4K8ac_peak_14619 | 8.28234  | AC005523.3_ENSG000000268536;FEM1A_ENSG00000141965 |
| 19 | 4803671 | 4803872 | KD2-H4K8ac_peak_14620 | 6.45018  |                                                   |
| 19 | 4809458 | 4809681 | KD2-H4K8ac_peak_14621 | 7.08474  |                                                   |
| 19 | 4815955 | 4816707 | KD2-H4K8ac_peak_14622 | 22.04674 |                                                   |
| 19 | 4830839 | 4831191 | KD2-H4K8ac_peak_14623 | 8.5781   | TICAM1_ENSG00000127666                            |
| 19 | 4831510 | 4832226 | KD2-H4K8ac_peak_14624 | 19.55721 | TICAM1_ENSG00000127666                            |
| 19 | 4908988 | 4909329 | KD2-H4K8ac_peak_14625 | 5.51783  |                                                   |
| 19 | 4910119 | 4910557 | KD2-H4K8ac_peak_14626 | 11.89502 |                                                   |

|    |         |         |                       |          |                                                                          |
|----|---------|---------|-----------------------|----------|--------------------------------------------------------------------------|
| 19 | 4968351 | 4968544 | KD2-H4K8ac_peak_14627 | 5.14125  | KDM4B_ENSG00000127663                                                    |
| 19 | 4969163 | 4969469 | KD2-H4K8ac_peak_14628 | 9.59814  | KDM4B_ENSG00000127663                                                    |
| 19 | 5037458 | 5037910 | KD2-H4K8ac_peak_14629 | 4.54006  |                                                                          |
| 19 | 5090798 | 5091067 | KD2-H4K8ac_peak_14630 | 7.11824  |                                                                          |
| 19 | 5092395 | 5092734 | KD2-H4K8ac_peak_14631 | 4.85908  |                                                                          |
| 19 | 5093295 | 5093497 | KD2-H4K8ac_peak_14632 | 5.29555  |                                                                          |
| 19 | 5093780 | 5094094 | KD2-H4K8ac_peak_14633 | 4.82973  |                                                                          |
| 19 | 5107333 | 5107730 | KD2-H4K8ac_peak_14634 | 5.49497  |                                                                          |
| 19 | 5292936 | 5293210 | KD2-H4K8ac_peak_14635 | 14.66631 |                                                                          |
| 19 | 5293456 | 5293814 | KD2-H4K8ac_peak_14636 | 15.58442 |                                                                          |
| 19 | 5308033 | 5309211 | KD2-H4K8ac_peak_14637 | 11.14658 |                                                                          |
| 19 | 5340323 | 5340733 | KD2-H4K8ac_peak_14638 | 10.43145 | PTPRS_ENSG00000105426                                                    |
| 19 | 5436083 | 5436666 | KD2-H4K8ac_peak_14639 | 13.57066 |                                                                          |
| 19 | 5436925 | 5437276 | KD2-H4K8ac_peak_14640 | 20.88898 |                                                                          |
| 19 | 5480177 | 5480533 | KD2-H4K8ac_peak_14641 | 6.25869  |                                                                          |
| 19 | 5553645 | 5554657 | KD2-H4K8ac_peak_14642 | 11.05407 |                                                                          |
| 19 | 5578108 | 5578371 | KD2-H4K8ac_peak_14643 | 7.76329  |                                                                          |
| 19 | 5622410 | 5622770 | KD2-H4K8ac_peak_14644 | 12.70959 | SAFB_ENSG00000160633                                                     |
| 19 | 5623193 | 5623577 | KD2-H4K8ac_peak_14645 | 6.16883  | SAFB2_ENSG00000130254;SAFB_ENSG00000160633                               |
| 19 | 5679991 | 5680382 | KD2-H4K8ac_peak_14646 | 8.3261   | C19orf70_ENSG00000174917;HSD11B1L_ENSG00000167733                        |
| 19 | 5690379 | 5690904 | KD2-H4K8ac_peak_14647 | 6.40297  |                                                                          |
| 19 | 5719638 | 5720144 | KD2-H4K8ac_peak_14648 | 14.69247 | LONP1_ENSG00000196365;CATSPERD_ENSG00000174898                           |
| 19 | 5720781 | 5721526 | KD2-H4K8ac_peak_14649 | 10.17341 | LONP1_ENSG00000196365;CATSPERD_ENSG00000174898                           |
| 19 | 5773038 | 5773841 | KD2-H4K8ac_peak_14650 | 10.96455 |                                                                          |
| 19 | 5790832 | 5791172 | KD2-H4K8ac_peak_14651 | 16.04168 | DUS3L_ENSG00000141994                                                    |
| 19 | 5791476 | 5791768 | KD2-H4K8ac_peak_14652 | 10.29344 | DUS3L_ENSG00000141994                                                    |
| 19 | 5798150 | 5798352 | KD2-H4K8ac_peak_14653 | 6.25869  |                                                                          |
| 19 | 5799519 | 5800139 | KD2-H4K8ac_peak_14654 | 3.90565  |                                                                          |
| 19 | 5801933 | 5802195 | KD2-H4K8ac_peak_14655 | 5.1313   |                                                                          |
| 19 | 5803691 | 5804031 | KD2-H4K8ac_peak_14656 | 8.30974  |                                                                          |
| 19 | 5804513 | 5804888 | KD2-H4K8ac_peak_14657 | 8.66888  |                                                                          |
| 19 | 5805745 | 5805937 | KD2-H4K8ac_peak_14658 | 9.73163  |                                                                          |
| 19 | 5827136 | 5827660 | KD2-H4K8ac_peak_14659 | 6.05809  |                                                                          |
| 19 | 5827903 | 5828123 | KD2-H4K8ac_peak_14660 | 7.76104  |                                                                          |
| 19 | 5828371 | 5828713 | KD2-H4K8ac_peak_14661 | 9.07715  |                                                                          |
| 19 | 5828952 | 5830013 | KD2-H4K8ac_peak_14662 | 10.96455 |                                                                          |
| 19 | 5893061 | 5894488 | KD2-H4K8ac_peak_14663 | 9.36516  |                                                                          |
| 19 | 5894805 | 5895320 | KD2-H4K8ac_peak_14664 | 9.95342  |                                                                          |
| 19 | 5903458 | 5903746 | KD2-H4K8ac_peak_14665 | 15.76765 | FUT5_ENSG00000130383;AC024592.12_ENSG00000267740;NDUFA11_ENSG00000174886 |
| 19 | 5927725 | 5927933 | KD2-H4K8ac_peak_14666 | 7.07117  |                                                                          |
| 19 | 5933068 | 5934309 | KD2-H4K8ac_peak_14667 | 6.84261  |                                                                          |
| 19 | 5935824 | 5936564 | KD2-H4K8ac_peak_14668 | 10.43601 |                                                                          |
| 19 | 5977781 | 5978065 | KD2-H4K8ac_peak_14669 | 14.4458  | RANBP3_ENSG00000031823;CTC-232P5.1_ENSG00000266983                       |
| 19 | 5978387 | 5978668 | KD2-H4K8ac_peak_14670 | 17.83665 | RANBP3_ENSG00000031823;CTC-232P5.1_ENSG00000266983                       |
| 19 | 5994274 | 5995460 | KD2-H4K8ac_peak_14671 | 13.13969 |                                                                          |
| 19 | 6200101 | 6200382 | KD2-H4K8ac_peak_14672 | 6.56211  | RFX2_ENSG00000087903                                                     |

|    |         |         |                       |          |                                                                           |
|----|---------|---------|-----------------------|----------|---------------------------------------------------------------------------|
| 19 | 6279447 | 6279655 | KD2-H4K8ac_peak_14673 | 11.05467 | MLLT1_ENSG00000130382                                                     |
| 19 | 6361551 | 6362044 | KD2-H4K8ac_peak_14674 | 20.5798  | CTB-180A7.3_ENSG00000269802;CLPP_ENSG00000125656                          |
| 19 | 6372861 | 6373134 | KD2-H4K8ac_peak_14675 | 13.44374 | ALKBH7_ENSG00000125652                                                    |
| 19 | 6373935 | 6374166 | KD2-H4K8ac_peak_14676 | 5.18447  |                                                                           |
| 19 | 6393616 | 6394298 | KD2-H4K8ac_peak_14677 | 12.57865 | GTF2F1_ENSG00000125651;CTB-180A7.8_ENSG00000214347                        |
| 19 | 6424247 | 6424772 | KD2-H4K8ac_peak_14678 | 5.58324  | KHSRP_ENSG00000088247                                                     |
| 19 | 6425575 | 6426051 | KD2-H4K8ac_peak_14679 | 14.71663 | KHSRP_ENSG00000088247                                                     |
| 19 | 6459463 | 6459772 | KD2-H4K8ac_peak_14680 | 11.60333 |                                                                           |
| 19 | 6477159 | 6477372 | KD2-H4K8ac_peak_14681 | 7.33266  |                                                                           |
| 19 | 6502215 | 6503004 | KD2-H4K8ac_peak_14682 | 12.74171 | TUBB4A_ENSG00000104833                                                    |
| 19 | 6504349 | 6504745 | KD2-H4K8ac_peak_14683 | 8.23062  |                                                                           |
| 19 | 6737366 | 6737575 | KD2-H4K8ac_peak_14684 | 14.68449 | GPR108_ENSG00000125734;TRIP10_ENSG00000125733                             |
| 19 | 6738132 | 6739401 | KD2-H4K8ac_peak_14685 | 9.1707   | GPR108_ENSG00000125734;TRIP10_ENSG00000125733                             |
| 19 | 7068888 | 7069086 | KD2-H4K8ac_peak_14686 | 4.86324  | ZNF557_ENSG00000130544                                                    |
| 19 | 7069450 | 7069997 | KD2-H4K8ac_peak_14687 | 12.82393 | ZNF557_ENSG00000130544                                                    |
| 19 | 7098980 | 7099207 | KD2-H4K8ac_peak_14688 | 9.57101  |                                                                           |
| 19 | 7099651 | 7099849 | KD2-H4K8ac_peak_14689 | 5.3778   |                                                                           |
| 19 | 7198344 | 7198734 | KD2-H4K8ac_peak_14690 | 10.05606 |                                                                           |
| 19 | 7444769 | 7445468 | KD2-H4K8ac_peak_14691 | 7.40111  | CTD-2207O23.3_ENSG00000268861                                             |
| 19 | 7459529 | 7459761 | KD2-H4K8ac_peak_14692 | 9.47671  | CTB-133G6.2_ENSG00000267852;ARHGEF18_ENSG00000104880                      |
| 19 | 7460075 | 7460325 | KD2-H4K8ac_peak_14693 | 13.35993 | CTB-133G6.2_ENSG00000267852;ARHGEF18_ENSG00000104880                      |
| 19 | 7547137 | 7547373 | KD2-H4K8ac_peak_14694 | 7.18615  |                                                                           |
| 19 | 7547568 | 7547863 | KD2-H4K8ac_peak_14695 | 3.90565  |                                                                           |
| 19 | 7548331 | 7548965 | KD2-H4K8ac_peak_14696 | 8.58069  |                                                                           |
| 19 | 7554050 | 7554469 | KD2-H4K8ac_peak_14697 | 9.11031  |                                                                           |
| 19 | 7558864 | 7559847 | KD2-H4K8ac_peak_14698 | 8.85813  |                                                                           |
| 19 | 7565620 | 7565973 | KD2-H4K8ac_peak_14699 | 12.23    |                                                                           |
| 19 | 7566203 | 7566598 | KD2-H4K8ac_peak_14700 | 5.75757  |                                                                           |
| 19 | 7571327 | 7571562 | KD2-H4K8ac_peak_14701 | 7.47462  | CTD-2207O23.12_ENSG00000267952                                            |
| 19 | 7571797 | 7572039 | KD2-H4K8ac_peak_14702 | 5.98124  | CTD-2207O23.12_ENSG00000267952                                            |
| 19 | 7573177 | 7573397 | KD2-H4K8ac_peak_14703 | 6.24114  |                                                                           |
| 19 | 7579506 | 7579800 | KD2-H4K8ac_peak_14704 | 9.11031  | ZNF358_ENSG00000198816                                                    |
| 19 | 7580046 | 7580951 | KD2-H4K8ac_peak_14705 | 18.5703  | ZNF358_ENSG00000198816                                                    |
| 19 | 7581202 | 7581669 | KD2-H4K8ac_peak_14706 | 14.69317 |                                                                           |
| 19 | 7598276 | 7598802 | KD2-H4K8ac_peak_14707 | 8.85813  | CTD-2207O23.10_ENSG00000268614;PNPLA6_ENSG00000032444                     |
| 19 | 7600670 | 7601074 | KD2-H4K8ac_peak_14708 | 14.99434 |                                                                           |
| 19 | 7615701 | 7615940 | KD2-H4K8ac_peak_14709 | 9.12849  |                                                                           |
| 19 | 7616513 | 7616985 | KD2-H4K8ac_peak_14710 | 6.60096  |                                                                           |
| 19 | 7660318 | 7660678 | KD2-H4K8ac_peak_14711 | 5.14125  | CAMSAP3_ENSG00000076826                                                   |
| 19 | 7661118 | 7661560 | KD2-H4K8ac_peak_14712 | 9.11031  | CAMSAP3_ENSG00000076826                                                   |
| 19 | 7681203 | 7681400 | KD2-H4K8ac_peak_14713 | 5.14125  |                                                                           |
| 19 | 7684055 | 7684298 | KD2-H4K8ac_peak_14714 | 9.20193  |                                                                           |
| 19 | 7684546 | 7685145 | KD2-H4K8ac_peak_14715 | 7.07117  |                                                                           |
| 19 | 7693987 | 7694388 | KD2-H4K8ac_peak_14716 | 8.85813  | XAB2_ENSG00000076924;PET100_ENSG00000229833;CTD-3214H19.4_ENSG00000268400 |
| 19 | 7694706 | 7695133 | KD2-H4K8ac_peak_14717 | 9.73431  | XAB2_ENSG00000076924;PET100_ENSG00000229833;CTD-3214H19.4_ENSG00000268400 |
| 19 | 7745232 | 7746412 | KD2-H4K8ac_peak_14718 | 12.88108 | TRAPPC5_ENSG00000181029                                                   |

|    |         |         |                       |          |                                                                             |
|----|---------|---------|-----------------------|----------|-----------------------------------------------------------------------------|
| 19 | 7894036 | 7894377 | KD2-H4K8ac_peak_14719 | 12.05219 | EVI5L_ENSG00000142459                                                       |
| 19 | 7895151 | 7895360 | KD2-H4K8ac_peak_14720 | 6.8836   | EVI5L_ENSG00000142459                                                       |
| 19 | 7938952 | 7939366 | KD2-H4K8ac_peak_14721 | 7.76104  | CTD-3193O13.9_ENSG00000183248                                               |
| 19 | 7939720 | 7940199 | KD2-H4K8ac_peak_14722 | 7.45501  | CTD-3193O13.9_ENSG00000183248                                               |
| 19 | 7968057 | 7968353 | KD2-H4K8ac_peak_14723 | 8.10216  | AC010336.1_ENSG00000214248;RN7SL115P_ENSG00000264166;MAP2K7_ENSG00000076984 |
| 19 | 7981327 | 7981818 | KD2-H4K8ac_peak_14724 | 8.55271  | TGFBR3L_ENSG00000260001                                                     |
| 19 | 7984569 | 7985033 | KD2-H4K8ac_peak_14725 | 12.36441 | CTD-3193O13.1_ENSG00000260500;SNAPC2_ENSG00000104976                        |
| 19 | 7990423 | 7990809 | KD2-H4K8ac_peak_14726 | 12.08081 | CTXN1_ENSG00000178531;CTD-3193O13.8_ENSG00000269139                         |
| 19 | 8007766 | 8008543 | KD2-H4K8ac_peak_14727 | 16.11042 | TIMM44_ENSG00000104980                                                      |
| 19 | 8070790 | 8071020 | KD2-H4K8ac_peak_14728 | 5.59859  | ELAVL1_ENSG00000066044                                                      |
| 19 | 8115085 | 8115394 | KD2-H4K8ac_peak_14729 | 10.05606 |                                                                             |
| 19 | 8273278 | 8273853 | KD2-H4K8ac_peak_14730 | 14.8083  |                                                                             |
| 19 | 8274168 | 8274898 | KD2-H4K8ac_peak_14731 | 9.34989  |                                                                             |
| 19 | 8305716 | 8305984 | KD2-H4K8ac_peak_14732 | 3.75035  |                                                                             |
| 19 | 8334063 | 8334373 | KD2-H4K8ac_peak_14733 | 10.21502 |                                                                             |
| 19 | 8372945 | 8373203 | KD2-H4K8ac_peak_14734 | 5.38581  | CD320_ENSG00000167775                                                       |
| 19 | 8385544 | 8386208 | KD2-H4K8ac_peak_14735 | 12.08081 | NDUFA7_ENSG00000167774;NDUFA7_ENSG00000267855;RPS28_ENSG00000233927         |
| 19 | 8407775 | 8407968 | KD2-H4K8ac_peak_14736 | 5.9696   | KANK3_ENSG00000186994                                                       |
| 19 | 8454475 | 8454735 | KD2-H4K8ac_peak_14737 | 9.1707   | RAB11B-AS1_ENSG00000269386;MIR4999_ENSG00000265390;RAB11B_ENSG00000185236   |
| 19 | 8455271 | 8455612 | KD2-H4K8ac_peak_14738 | 28.09984 | RAB11B-AS1_ENSG00000269386;RAB11B_ENSG00000185236                           |
| 19 | 8478252 | 8478481 | KD2-H4K8ac_peak_14739 | 8.30974  | MARCH2_ENSG00000099785                                                      |
| 19 | 8509020 | 8509302 | KD2-H4K8ac_peak_14740 | 8.74596  | HNRNPM_ENSG00000099783                                                      |
| 19 | 8509997 | 8510629 | KD2-H4K8ac_peak_14741 | 8.52559  | HNRNPM_ENSG00000099783                                                      |
| 19 | 8570574 | 8571634 | KD2-H4K8ac_peak_14742 | 14.45402 |                                                                             |
| 19 | 8577911 | 8579688 | KD2-H4K8ac_peak_14743 | 18.31034 | ZNF414_ENSG00000133250                                                      |
| 19 | 8591024 | 8591489 | KD2-H4K8ac_peak_14744 | 7.47462  |                                                                             |
| 19 | 8674225 | 8674678 | KD2-H4K8ac_peak_14745 | 10.7186  | ADAMTS10_ENSG00000142303                                                    |
| 19 | 8675444 | 8675801 | KD2-H4K8ac_peak_14746 | 6.66359  | ADAMTS10_ENSG00000142303                                                    |
| 19 | 8942605 | 8942868 | KD2-H4K8ac_peak_14747 | 8.16906  | ZNF558_ENSG00000167785;MBD3L1_ENSG00000170948;CTD-2529P6.4_ENSG00000269400  |
| 19 | 9247769 | 9248021 | KD2-H4K8ac_peak_14748 | 8.00457  |                                                                             |
| 19 | 9251089 | 9251367 | KD2-H4K8ac_peak_14749 | 15.9336  | ZNF317_ENSG00000130803                                                      |
| 19 | 9394112 | 9394386 | KD2-H4K8ac_peak_14750 | 5.54647  |                                                                             |
| 19 | 9420193 | 9420779 | KD2-H4K8ac_peak_14751 | 6.65673  | ZNF699_ENSG00000196110                                                      |
| 19 | 9421320 | 9421517 | KD2-H4K8ac_peak_14752 | 5.07901  | ZNF699_ENSG00000196110                                                      |
| 19 | 9434440 | 9434725 | KD2-H4K8ac_peak_14753 | 7.76329  | ZNF559_ENSG00000188321;ZNF559-ZNF177_ENSG00000270011;ZNF177_ENSG00000188629 |
| 19 | 9434972 | 9435282 | KD2-H4K8ac_peak_14754 | 24.85162 | ZNF559_ENSG00000188321;ZNF559-ZNF177_ENSG00000270011;ZNF177_ENSG00000188629 |
| 19 | 9517447 | 9517760 | KD2-H4K8ac_peak_14755 | 5.57044  |                                                                             |
| 19 | 9517954 | 9518146 | KD2-H4K8ac_peak_14756 | 6.31143  |                                                                             |
| 19 | 9546351 | 9546915 | KD2-H4K8ac_peak_14757 | 9.15069  | ZNF266_ENSG00000174652                                                      |
| 19 | 9648900 | 9649533 | KD2-H4K8ac_peak_14758 | 9.11031  | ZNF426_ENSG00000130818                                                      |
| 19 | 9694759 | 9695494 | KD2-H4K8ac_peak_14759 | 10.35678 | ZNF121_ENSG00000197961                                                      |
| 19 | 9731676 | 9732107 | KD2-H4K8ac_peak_14760 | 8.16906  | ZNF561_ENSG00000171469;C19orf82_ENSG00000267106                             |
| 19 | 9785489 | 9786605 | KD2-H4K8ac_peak_14761 | 8.16906  | ZNF562_ENSG00000171466                                                      |
| 19 | 9878855 | 9879241 | KD2-H4K8ac_peak_14762 | 9.43685  |                                                                             |
| 19 | 9896572 | 9896934 | KD2-H4K8ac_peak_14763 | 12.84642 |                                                                             |
| 19 | 9929103 | 9929342 | KD2-H4K8ac_peak_14764 | 6.99815  |                                                                             |

|    |          |          |                       |          |                                                                             |
|----|----------|----------|-----------------------|----------|-----------------------------------------------------------------------------|
| 19 | 9930397  | 9930845  | KD2-H4K8ac_peak_14765 | 7.27716  | SNORA70_ENSG00000200237;RPL10P15_ENSG00000267119;AC008752.1_ENSG00000216102 |
| 19 | 9938058  | 9938410  | KD2-H4K8ac_peak_14766 | 10.19949 | FBXL12_ENSG00000127452;UBL5_ENSG00000198258                                 |
| 19 | 9938656  | 9938943  | KD2-H4K8ac_peak_14767 | 13.70753 | FBXL12_ENSG00000127452;UBL5_ENSG00000198258                                 |
| 19 | 10024094 | 10024395 | KD2-H4K8ac_peak_14768 | 5.88845  |                                                                             |
| 19 | 10024855 | 10025243 | KD2-H4K8ac_peak_14769 | 7.35686  |                                                                             |
| 19 | 10046797 | 10047087 | KD2-H4K8ac_peak_14770 | 13.73635 | OLFM2_ENSG00000105088                                                       |
| 19 | 10047338 | 10047632 | KD2-H4K8ac_peak_14771 | 9.08816  | OLFM2_ENSG00000105088                                                       |
| 19 | 10056184 | 10057014 | KD2-H4K8ac_peak_14772 | 11.86082 |                                                                             |
| 19 | 10196306 | 10197389 | KD2-H4K8ac_peak_14773 | 16.33377 | C19orf66_ENSG00000130813                                                    |
| 19 | 10207062 | 10207561 | KD2-H4K8ac_peak_14774 | 25.46877 |                                                                             |
| 19 | 10216521 | 10216763 | KD2-H4K8ac_peak_14775 | 16.09057 | PPAN-P2RY11_ENSG00000243207;PPAN_ENSG00000130810                            |
| 19 | 10217076 | 10217719 | KD2-H4K8ac_peak_14776 | 19.91242 | PPAN-P2RY11_ENSG00000243207;PPAN_ENSG00000130810;SNORD105_ENSG00000209645   |
| 19 | 10229923 | 10230508 | KD2-H4K8ac_peak_14777 | 15.82362 | EIF3G_ENSG00000130811                                                       |
| 19 | 10230733 | 10230954 | KD2-H4K8ac_peak_14778 | 8.85813  | EIF3G_ENSG00000130811                                                       |
| 19 | 10249027 | 10249563 | KD2-H4K8ac_peak_14779 | 7.76104  |                                                                             |
| 19 | 10305394 | 10305613 | KD2-H4K8ac_peak_14780 | 11.89502 |                                                                             |
| 19 | 10305912 | 10307009 | KD2-H4K8ac_peak_14781 | 13.01932 |                                                                             |
| 19 | 10337030 | 10337533 | KD2-H4K8ac_peak_14782 | 7.27716  |                                                                             |
| 19 | 10341087 | 10341942 | KD2-H4K8ac_peak_14783 | 12.14909 | DNMT1_ENSG00000130816;S1PR2_ENSG00000267534;MIR4322_ENSG00000264266         |
| 19 | 10346951 | 10347418 | KD2-H4K8ac_peak_14784 | 8.30974  |                                                                             |
| 19 | 10361950 | 10362220 | KD2-H4K8ac_peak_14785 | 8.30974  | MRPL4_ENSG00000105364                                                       |
| 19 | 10426246 | 10426519 | KD2-H4K8ac_peak_14786 | 4.91674  | FDX1L_ENSG00000267673;CTD-2369P2.10_ENSG00000167807                         |
| 19 | 10443942 | 10444158 | KD2-H4K8ac_peak_14787 | 7.98621  | RAVER1_ENSG00000161847                                                      |
| 19 | 10490549 | 10491226 | KD2-H4K8ac_peak_14788 | 19.33018 | TYK2_ENSG00000105397                                                        |
| 19 | 10491545 | 10491823 | KD2-H4K8ac_peak_14789 | 9.31907  | TYK2_ENSG00000105397                                                        |
| 19 | 10515052 | 10516087 | KD2-H4K8ac_peak_14790 | 8.85813  | MIR1181_ENSG00000221566                                                     |
| 19 | 10527051 | 10527273 | KD2-H4K8ac_peak_14791 | 4.37809  | PDE4A_ENSG00000065989                                                       |
| 19 | 10589827 | 10590258 | KD2-H4K8ac_peak_14792 | 10.43145 |                                                                             |
| 19 | 10612393 | 10614266 | KD2-H4K8ac_peak_14793 | 19.3691  | KEAP1_ENSG00000079999                                                       |
| 19 | 10654076 | 10654410 | KD2-H4K8ac_peak_14794 | 6.16747  | ATG4D_ENSG00000130734                                                       |
| 19 | 10654708 | 10655024 | KD2-H4K8ac_peak_14795 | 5.75757  | ATG4D_ENSG00000130734                                                       |
| 19 | 10676180 | 10676596 | KD2-H4K8ac_peak_14796 | 12.57143 | KRI1_ENSG00000129347                                                        |
| 19 | 10679974 | 10680343 | KD2-H4K8ac_peak_14797 | 5.9696   | CDKN2D_ENSG00000129355                                                      |
| 19 | 10682423 | 10683060 | KD2-H4K8ac_peak_14798 | 8.26945  |                                                                             |
| 19 | 10713244 | 10713882 | KD2-H4K8ac_peak_14799 | 7.36799  | SLC44A2_ENSG00000129353                                                     |
| 19 | 10736272 | 10736689 | KD2-H4K8ac_peak_14800 | 10.17341 |                                                                             |
| 19 | 10755039 | 10755314 | KD2-H4K8ac_peak_14801 | 3.72574  |                                                                             |
| 19 | 10763972 | 10764448 | KD2-H4K8ac_peak_14802 | 9.95342  | ILF3-AS1_ENSG00000267100;ILF3_ENSG00000129351                               |
| 19 | 10765028 | 10765359 | KD2-H4K8ac_peak_14803 | 11.24702 | ILF3-AS1_ENSG00000267100;ILF3_ENSG00000129351                               |
| 19 | 10765580 | 10766042 | KD2-H4K8ac_peak_14804 | 5.9696   | ILF3_ENSG00000129351                                                        |
| 19 | 10811607 | 10811874 | KD2-H4K8ac_peak_14805 | 9.31907  | QTRT1_ENSG00000213339                                                       |
| 19 | 10812187 | 10812531 | KD2-H4K8ac_peak_14806 | 6.20982  | QTRT1_ENSG00000213339                                                       |
| 19 | 10828840 | 10829174 | KD2-H4K8ac_peak_14807 | 6.65673  | DNM2_ENSG00000079805;MIR638_ENSG00000207972                                 |
| 19 | 10927285 | 10927709 | KD2-H4K8ac_peak_14808 | 6.82618  | MIR199A1_ENSG00000207752                                                    |
| 19 | 10928051 | 10928392 | KD2-H4K8ac_peak_14809 | 10.05606 | MIR199A1_ENSG00000207752                                                    |
| 19 | 10946638 | 10946836 | KD2-H4K8ac_peak_14810 | 9.61895  | TMED1_ENSG00000099203;C19orf38_ENSG00000214212                              |

|    |          |          |                       |          |                                                                       |
|----|----------|----------|-----------------------|----------|-----------------------------------------------------------------------|
| 19 | 10947128 | 10947384 | KD2-H4K8ac_peak_14811 | 10.17341 | TMED1_ENSG00000099203;C19orf38_ENSG00000214212                        |
| 19 | 10974825 | 10975084 | KD2-H4K8ac_peak_14812 | 7.40111  |                                                                       |
| 19 | 10980855 | 10981395 | KD2-H4K8ac_peak_14813 | 5.75757  | CARM1_ENSG00000142453                                                 |
| 19 | 10982426 | 10982794 | KD2-H4K8ac_peak_14814 | 15.81711 | CARM1_ENSG00000142453                                                 |
| 19 | 10990102 | 10990329 | KD2-H4K8ac_peak_14815 | 10.17486 |                                                                       |
| 19 | 10998954 | 10999148 | KD2-H4K8ac_peak_14816 | 7.47462  |                                                                       |
| 19 | 11038918 | 11039312 | KD2-H4K8ac_peak_14817 | 11.51672 | YIPF2_ENSG00000130733;C19orf52_ENSG00000142444                        |
| 19 | 11039631 | 11040017 | KD2-H4K8ac_peak_14818 | 5.01002  | YIPF2_ENSG00000130733;C19orf52_ENSG00000142444                        |
| 19 | 11047598 | 11047856 | KD2-H4K8ac_peak_14819 | 8.1718   |                                                                       |
| 19 | 11070619 | 11070849 | KD2-H4K8ac_peak_14820 | 6.34383  | SMARCA4_ENSG00000127616                                               |
| 19 | 11071083 | 11071336 | KD2-H4K8ac_peak_14821 | 14.15075 | SMARCA4_ENSG00000127616                                               |
| 19 | 11071768 | 11072408 | KD2-H4K8ac_peak_14822 | 13.81781 | SMARCA4_ENSG00000127616                                               |
| 19 | 11196123 | 11196585 | KD2-H4K8ac_peak_14823 | 5.51783  |                                                                       |
| 19 | 11247887 | 11248154 | KD2-H4K8ac_peak_14824 | 5.54647  |                                                                       |
| 19 | 11249446 | 11249711 | KD2-H4K8ac_peak_14825 | 9.94337  |                                                                       |
| 19 | 11249917 | 11250183 | KD2-H4K8ac_peak_14826 | 6.25869  |                                                                       |
| 19 | 11252759 | 11253040 | KD2-H4K8ac_peak_14827 | 4.06758  |                                                                       |
| 19 | 11253446 | 11253927 | KD2-H4K8ac_peak_14828 | 13.95627 |                                                                       |
| 19 | 11266068 | 11266425 | KD2-H4K8ac_peak_14829 | 17.70889 | SPC24_ENSG00000161888                                                 |
| 19 | 11305589 | 11305957 | KD2-H4K8ac_peak_14830 | 6.60096  |                                                                       |
| 19 | 11307987 | 11308518 | KD2-H4K8ac_peak_14831 | 9.36516  | KANK2_ENSG00000197256                                                 |
| 19 | 11373288 | 11373548 | KD2-H4K8ac_peak_14832 | 6.25869  | DOCK6_ENSG00000130158                                                 |
| 19 | 11403875 | 11404220 | KD2-H4K8ac_peak_14833 | 6.1846   |                                                                       |
| 19 | 11434698 | 11435001 | KD2-H4K8ac_peak_14834 | 8.30974  | CTC-510F12.4_ENSG00000267174                                          |
| 19 | 11435408 | 11435940 | KD2-H4K8ac_peak_14835 | 7.27716  | CTC-510F12.4_ENSG00000267174                                          |
| 19 | 11456047 | 11456359 | KD2-H4K8ac_peak_14836 | 7.51935  | RAB3D_ENSG00000105514;TMEM205_ENSG00000105518;CCDC159_ENSG00000183401 |
| 19 | 11457383 | 11457886 | KD2-H4K8ac_peak_14837 | 9.72244  | RAB3D_ENSG00000105514;TMEM205_ENSG00000105518                         |
| 19 | 11465524 | 11465910 | KD2-H4K8ac_peak_14838 | 12.06346 | DKFZP761J1410_ENSG00000105520                                         |
| 19 | 11484593 | 11484900 | KD2-H4K8ac_peak_14839 | 8.16133  | CTD-2342J14.6_ENSG00000267277;SWSAP1_ENSG00000173928                  |
| 19 | 11493834 | 11494448 | KD2-H4K8ac_peak_14840 | 6.40297  | EPOR_ENSG00000187266                                                  |
| 19 | 11494676 | 11494943 | KD2-H4K8ac_peak_14841 | 11.86082 | EPOR_ENSG00000187266                                                  |
| 19 | 11529074 | 11529545 | KD2-H4K8ac_peak_14842 | 7.36799  |                                                                       |
| 19 | 11530168 | 11530492 | KD2-H4K8ac_peak_14843 | 6.13909  |                                                                       |
| 19 | 11545689 | 11545888 | KD2-H4K8ac_peak_14844 | 5.14125  | CCDC151_ENSG00000198003;PRKCSH_ENSG00000130175                        |
| 19 | 11546502 | 11546965 | KD2-H4K8ac_peak_14845 | 4.06758  | CCDC151_ENSG00000198003;PRKCSH_ENSG00000130175                        |
| 19 | 11562464 | 11562768 | KD2-H4K8ac_peak_14846 | 4.86324  |                                                                       |
| 19 | 11589869 | 11590271 | KD2-H4K8ac_peak_14847 | 10.61986 |                                                                       |
| 19 | 11590775 | 11591045 | KD2-H4K8ac_peak_14848 | 10.53377 | ELAVL3_ENSG00000196361                                                |
| 19 | 11591508 | 11591737 | KD2-H4K8ac_peak_14849 | 6.83936  | ELAVL3_ENSG00000196361                                                |
| 19 | 11593162 | 11593476 | KD2-H4K8ac_peak_14850 | 11.27376 |                                                                       |
| 19 | 11616209 | 11616601 | KD2-H4K8ac_peak_14851 | 16.3889  | CTC-398G3.6_ENSG00000267477;ZNF653_ENSG00000161914                    |
| 19 | 11616851 | 11617203 | KD2-H4K8ac_peak_14852 | 12.82393 | CTC-398G3.6_ENSG00000267477;ZNF653_ENSG00000161914                    |
| 19 | 11640215 | 11640544 | KD2-H4K8ac_peak_14853 | 8.66368  | ECSIT_ENSG00000130159                                                 |
| 19 | 11646338 | 11646940 | KD2-H4K8ac_peak_14854 | 8.30974  |                                                                       |
| 19 | 11651305 | 11651864 | KD2-H4K8ac_peak_14855 | 5.23853  |                                                                       |
| 19 | 11670360 | 11670590 | KD2-H4K8ac_peak_14856 | 7.44366  | ELOF1_ENSG00000130165;ZNF627_ENSG00000198551                          |

|    |          |          |                       |          |                                                                      |
|----|----------|----------|-----------------------|----------|----------------------------------------------------------------------|
| 19 | 11698718 | 11699022 | KD2-H4K8ac_peak_14857 | 4.42765  |                                                                      |
| 19 | 11708312 | 11708843 | KD2-H4K8ac_peak_14858 | 5.19622  |                                                                      |
| 19 | 11805412 | 11805619 | KD2-H4K8ac_peak_14859 | 4.03256  |                                                                      |
| 19 | 11850036 | 11850279 | KD2-H4K8ac_peak_14860 | 7.28827  | ZNF823_ENSG00000197933                                               |
| 19 | 11877296 | 11877609 | KD2-H4K8ac_peak_14861 | 8.26945  | ZNF441_ENSG00000197044                                               |
| 19 | 11908881 | 11909133 | KD2-H4K8ac_peak_14862 | 10.87093 | CTC-499B15.7_ENSG00000267646;ZNF491_ENSG00000177599                  |
| 19 | 11909469 | 11909698 | KD2-H4K8ac_peak_14863 | 6.84261  | CTC-499B15.7_ENSG00000267646;ZNF491_ENSG00000177599                  |
| 19 | 11925170 | 11925767 | KD2-H4K8ac_peak_14864 | 12.84642 | ZNF440_ENSG00000171295                                               |
| 19 | 11959034 | 11959349 | KD2-H4K8ac_peak_14865 | 8.93112  | ZNF439_ENSG00000171291                                               |
| 19 | 11959676 | 11960098 | KD2-H4K8ac_peak_14866 | 9.11031  | ZNF439_ENSG00000171291                                               |
| 19 | 12034918 | 12035170 | KD2-H4K8ac_peak_14867 | 4.66652  | ZNF700_ENSG00000196757;ZNF763_ENSG00000197054;ZNF763_ENSG00000267179 |
| 19 | 12035966 | 12036419 | KD2-H4K8ac_peak_14868 | 12.84642 | ZNF700_ENSG00000196757;ZNF763_ENSG00000197054;ZNF763_ENSG00000267179 |
| 19 | 12074463 | 12074674 | KD2-H4K8ac_peak_14869 | 5.45396  |                                                                      |
| 19 | 12075960 | 12076319 | KD2-H4K8ac_peak_14870 | 8.55271  |                                                                      |
| 19 | 12250755 | 12251080 | KD2-H4K8ac_peak_14871 | 4.06758  | ZNF20_ENSG00000132010                                                |
| 19 | 12267051 | 12267401 | KD2-H4K8ac_peak_14872 | 7.49599  | ZNF625-ZNF20_ENSG00000213297;ZNF625_ENSG00000257591                  |
| 19 | 12267780 | 12268069 | KD2-H4K8ac_peak_14873 | 6.36375  | ZNF625-ZNF20_ENSG00000213297;ZNF625_ENSG00000257591                  |
| 19 | 12273946 | 12274550 | KD2-H4K8ac_peak_14874 | 24.00936 | ZNF136_ENSG00000196646                                               |
| 19 | 12406183 | 12406617 | KD2-H4K8ac_peak_14875 | 8.33649  | ZNF44_ENSG00000197857                                                |
| 19 | 12444675 | 12445109 | KD2-H4K8ac_peak_14876 | 17.76996 | ZNF563_ENSG00000188868                                               |
| 19 | 12551560 | 12551781 | KD2-H4K8ac_peak_14877 | 8.65175  | CTD-3105H18.16_ENSG00000268870;ZNF443_ENSG00000180855                |
| 19 | 12552181 | 12552435 | KD2-H4K8ac_peak_14878 | 6.0073   | CTD-3105H18.16_ENSG00000268870;ZNF443_ENSG00000180855                |
| 19 | 12606309 | 12606826 | KD2-H4K8ac_peak_14879 | 22.07309 |                                                                      |
| 19 | 12661773 | 12662262 | KD2-H4K8ac_peak_14880 | 13.95627 | ZNF709_ENSG00000196826;ZNF564_ENSG00000249709                        |
| 19 | 12721258 | 12721459 | KD2-H4K8ac_peak_14881 | 8.17902  | ZNF791_ENSG00000173875                                               |
| 19 | 12721808 | 12722302 | KD2-H4K8ac_peak_14882 | 25.23999 | ZNF791_ENSG00000173875                                               |
| 19 | 12750621 | 12750917 | KD2-H4K8ac_peak_14883 | 4.77079  | ZNF490_ENSG00000188033                                               |
| 19 | 12751156 | 12751371 | KD2-H4K8ac_peak_14884 | 9.08816  | ZNF490_ENSG00000188033                                               |
| 19 | 12779930 | 12780182 | KD2-H4K8ac_peak_14885 | 8.85813  | CTD-2192J16.24_ENSG00000269590                                       |
| 19 | 12792439 | 12792644 | KD2-H4K8ac_peak_14886 | 5.59859  | DHPS_ENSG00000095059                                                 |
| 19 | 12792855 | 12793125 | KD2-H4K8ac_peak_14887 | 15.52826 | DHPS_ENSG00000095059                                                 |
| 19 | 12832112 | 12832422 | KD2-H4K8ac_peak_14888 | 6.36375  |                                                                      |
| 19 | 12833044 | 12833353 | KD2-H4K8ac_peak_14889 | 16.95032 |                                                                      |
| 19 | 12834973 | 12835282 | KD2-H4K8ac_peak_14890 | 15.13261 | TNPO2_ENSG00000105576                                                |
| 19 | 12845229 | 12845454 | KD2-H4K8ac_peak_14891 | 16.25886 | C19orf43_ENSG00000123144                                             |
| 19 | 12845786 | 12846226 | KD2-H4K8ac_peak_14892 | 10.43145 | C19orf43_ENSG00000123144                                             |
| 19 | 12847416 | 12847615 | KD2-H4K8ac_peak_14893 | 7.31433  | ASNA1_ENSG00000198356                                                |
| 19 | 12848362 | 12848683 | KD2-H4K8ac_peak_14894 | 9.57101  | ASNA1_ENSG00000198356                                                |
| 19 | 12867919 | 12868465 | KD2-H4K8ac_peak_14895 | 10.19949 |                                                                      |
| 19 | 12868676 | 12869007 | KD2-H4K8ac_peak_14896 | 12.93209 |                                                                      |
| 19 | 12886023 | 12886313 | KD2-H4K8ac_peak_14897 | 9.96798  |                                                                      |
| 19 | 12888550 | 12890493 | KD2-H4K8ac_peak_14898 | 14.8083  |                                                                      |
| 19 | 12893108 | 12893426 | KD2-H4K8ac_peak_14899 | 5.75757  |                                                                      |
| 19 | 12893830 | 12894082 | KD2-H4K8ac_peak_14900 | 16.49944 |                                                                      |
| 19 | 12894439 | 12895281 | KD2-H4K8ac_peak_14901 | 8.55271  | CTD-2659N19.9_ENSG00000267212                                        |
| 19 | 12896484 | 12896731 | KD2-H4K8ac_peak_14902 | 5.53033  | CTD-2659N19.9_ENSG00000267212                                        |



|    |          |          |                       |          |                                                      |
|----|----------|----------|-----------------------|----------|------------------------------------------------------|
| 19 | 12897167 | 12897602 | KD2-H4K8ac_peak_14903 | 12.67903 | MIR5684_ENSG00000263800                              |
| 19 | 12898041 | 12898688 | KD2-H4K8ac_peak_14904 | 4.8485   | MIR5684_ENSG00000263800                              |
| 19 | 12899284 | 12901216 | KD2-H4K8ac_peak_14905 | 17.43561 |                                                      |
| 19 | 12912231 | 12913432 | KD2-H4K8ac_peak_14906 | 10.43145 | PRDX2_ENSG00000167815                                |
| 19 | 12916819 | 12917199 | KD2-H4K8ac_peak_14907 | 11.86082 | RNASEH2A_ENSG00000104889                             |
| 19 | 12917488 | 12917963 | KD2-H4K8ac_peak_14908 | 5.54647  | RNASEH2A_ENSG00000104889                             |
| 19 | 12944872 | 12945294 | KD2-H4K8ac_peak_14909 | 5.9696   | RTBDN_ENSG00000132026;MAST1_ENSG00000105613          |
| 19 | 12946140 | 12946460 | KD2-H4K8ac_peak_14910 | 5.73016  | RTBDN_ENSG00000132026                                |
| 19 | 12949358 | 12949576 | KD2-H4K8ac_peak_14911 | 7.47462  |                                                      |
| 19 | 12958136 | 12958407 | KD2-H4K8ac_peak_14912 | 5.18447  |                                                      |
| 19 | 12991520 | 12992086 | KD2-H4K8ac_peak_14913 | 6.24114  | DNASE2_ENSG00000105612;CTD-2265O21.7_ENSG00000267735 |
| 19 | 12995811 | 12996355 | KD2-H4K8ac_peak_14914 | 10.0692  |                                                      |
| 19 | 13029624 | 13030028 | KD2-H4K8ac_peak_14915 | 7.79898  | SYCE2_ENSG00000161860                                |
| 19 | 13044208 | 13044482 | KD2-H4K8ac_peak_14916 | 9.95119  | FARSA_ENSG00000179115                                |
| 19 | 13044705 | 13044980 | KD2-H4K8ac_peak_14917 | 12.21163 | FARSA_ENSG00000179115                                |
| 19 | 13048438 | 13048988 | KD2-H4K8ac_peak_14918 | 9.63487  | CALR_ENSG00000179218                                 |
| 19 | 13056798 | 13057162 | KD2-H4K8ac_peak_14919 | 8.86099  | RAD23A_ENSG00000179262                               |
| 19 | 13064293 | 13064589 | KD2-H4K8ac_peak_14920 | 8.52921  |                                                      |
| 19 | 13064858 | 13065148 | KD2-H4K8ac_peak_14921 | 9.1707   |                                                      |
| 19 | 13067569 | 13068635 | KD2-H4K8ac_peak_14922 | 15.81711 | GADD45GIP1_ENSG00000179271                           |
| 19 | 13076038 | 13076623 | KD2-H4K8ac_peak_14923 | 14.4458  | DAND5_ENSG00000179284                                |
| 19 | 13079008 | 13079246 | KD2-H4K8ac_peak_14924 | 6.56211  |                                                      |
| 19 | 13080364 | 13080946 | KD2-H4K8ac_peak_14925 | 10.09333 |                                                      |
| 19 | 13085304 | 13086257 | KD2-H4K8ac_peak_14926 | 17.09929 |                                                      |
| 19 | 13106675 | 13106956 | KD2-H4K8ac_peak_14927 | 4.97693  | NFIX_ENSG00000008441                                 |
| 19 | 13129239 | 13129624 | KD2-H4K8ac_peak_14928 | 12.0857  |                                                      |
| 19 | 13132984 | 13133521 | KD2-H4K8ac_peak_14929 | 11.05467 |                                                      |
| 19 | 13164404 | 13165773 | KD2-H4K8ac_peak_14930 | 12.23    |                                                      |
| 19 | 13166117 | 13166882 | KD2-H4K8ac_peak_14931 | 19.87796 |                                                      |
| 19 | 13167080 | 13167337 | KD2-H4K8ac_peak_14932 | 11.11797 |                                                      |
| 19 | 13168164 | 13168367 | KD2-H4K8ac_peak_14933 | 6.66692  |                                                      |
| 19 | 13170781 | 13171715 | KD2-H4K8ac_peak_14934 | 8.4716   |                                                      |
| 19 | 13172055 | 13172250 | KD2-H4K8ac_peak_14935 | 3.75035  |                                                      |
| 19 | 13174777 | 13175215 | KD2-H4K8ac_peak_14936 | 4.86324  |                                                      |
| 19 | 13180352 | 13180556 | KD2-H4K8ac_peak_14937 | 7.12213  |                                                      |
| 19 | 13189105 | 13189720 | KD2-H4K8ac_peak_14938 | 9.5326   |                                                      |
| 19 | 13190374 | 13190926 | KD2-H4K8ac_peak_14939 | 10.30284 |                                                      |
| 19 | 13200168 | 13200781 | KD2-H4K8ac_peak_14940 | 10.0997  |                                                      |
| 19 | 13201239 | 13202117 | KD2-H4K8ac_peak_14941 | 13.81781 |                                                      |
| 19 | 13202417 | 13202848 | KD2-H4K8ac_peak_14942 | 10.30284 |                                                      |
| 19 | 13203110 | 13204042 | KD2-H4K8ac_peak_14943 | 20.2003  |                                                      |
| 19 | 13204305 | 13204704 | KD2-H4K8ac_peak_14944 | 6.20982  |                                                      |
| 19 | 13204924 | 13206567 | KD2-H4K8ac_peak_14945 | 15.38498 |                                                      |
| 19 | 13206763 | 13206990 | KD2-H4K8ac_peak_14946 | 6.25869  |                                                      |
| 19 | 13212994 | 13214490 | KD2-H4K8ac_peak_14947 | 15.59774 | LYL1_ENSG00000104903                                 |
| 19 | 13215176 | 13215441 | KD2-H4K8ac_peak_14948 | 6.20982  |                                                      |

|    |          |          |                       |          |                                                     |
|----|----------|----------|-----------------------|----------|-----------------------------------------------------|
| 19 | 13227147 | 13227532 | KD2-H4K8ac_peak_14949 | 12.93209 | TRMT1_ENSG00000104907                               |
| 19 | 13229240 | 13229511 | KD2-H4K8ac_peak_14950 | 5.88845  | TRMT1_ENSG00000104907;NACC1_ENSG00000160877         |
| 19 | 13261380 | 13261721 | KD2-H4K8ac_peak_14951 | 15.20126 | STX10_ENSG00000104915;IER2_ENSG00000160888          |
| 19 | 13262914 | 13263159 | KD2-H4K8ac_peak_14952 | 7.30812  |                                                     |
| 19 | 13273538 | 13273754 | KD2-H4K8ac_peak_14953 | 10.19949 |                                                     |
| 19 | 13274116 | 13274812 | KD2-H4K8ac_peak_14954 | 15.58442 |                                                     |
| 19 | 13275104 | 13275892 | KD2-H4K8ac_peak_14955 | 9.63487  |                                                     |
| 19 | 13278299 | 13278914 | KD2-H4K8ac_peak_14956 | 10.21366 |                                                     |
| 19 | 13283018 | 13283556 | KD2-H4K8ac_peak_14957 | 13.44374 |                                                     |
| 19 | 13292582 | 13293269 | KD2-H4K8ac_peak_14958 | 10.25088 |                                                     |
| 19 | 13842652 | 13842930 | KD2-H4K8ac_peak_14959 | 11.05467 | CCDC130_ENSG00000104957                             |
| 19 | 13858164 | 13858444 | KD2-H4K8ac_peak_14960 | 7.146    |                                                     |
| 19 | 13884595 | 13884814 | KD2-H4K8ac_peak_14961 | 5.28072  | CTB-5E10.3_ENSG00000267633;C19orf53_ENSG00000104979 |
| 19 | 13885333 | 13885675 | KD2-H4K8ac_peak_14962 | 18.54875 | CTB-5E10.3_ENSG00000267633;C19orf53_ENSG00000104979 |
| 19 | 13906258 | 13906751 | KD2-H4K8ac_peak_14963 | 19.55721 | ZSWIM4_ENSG00000132003;CTD-3252C9.2_ENSG00000267582 |
| 19 | 13949560 | 13950476 | KD2-H4K8ac_peak_14964 | 15.95195 |                                                     |
| 19 | 13951141 | 13951567 | KD2-H4K8ac_peak_14965 | 10.46874 |                                                     |
| 19 | 13953353 | 13953617 | KD2-H4K8ac_peak_14966 | 8.55581  |                                                     |
| 19 | 13953876 | 13954357 | KD2-H4K8ac_peak_14967 | 18.62675 |                                                     |
| 19 | 13954625 | 13955167 | KD2-H4K8ac_peak_14968 | 5.30799  |                                                     |
| 19 | 13957443 | 13958939 | KD2-H4K8ac_peak_14969 | 13.70753 |                                                     |
| 19 | 13961030 | 13961285 | KD2-H4K8ac_peak_14970 | 10.19949 |                                                     |
| 19 | 13961990 | 13962465 | KD2-H4K8ac_peak_14971 | 7.26089  |                                                     |
| 19 | 13972187 | 13972932 | KD2-H4K8ac_peak_14972 | 26.59781 | NANOS3_ENSG00000187556                              |
| 19 | 13975609 | 13976028 | KD2-H4K8ac_peak_14973 | 17.06312 |                                                     |
| 19 | 13976390 | 13976931 | KD2-H4K8ac_peak_14974 | 11.05467 |                                                     |
| 19 | 13991220 | 13991755 | KD2-H4K8ac_peak_14975 | 11.79585 |                                                     |
| 19 | 14016298 | 14016855 | KD2-H4K8ac_peak_14976 | 12.57143 | C19orf57_ENSG00000132016;CC2D1A_ENSG00000132024     |
| 19 | 14017075 | 14017583 | KD2-H4K8ac_peak_14977 | 13.50024 | C19orf57_ENSG00000132016;CC2D1A_ENSG00000132024     |
| 19 | 14048526 | 14049334 | KD2-H4K8ac_peak_14978 | 21.00776 |                                                     |
| 19 | 14063312 | 14063516 | KD2-H4K8ac_peak_14979 | 15.58456 | PODNL1_ENSG00000132000;DCAF15_ENSG00000132017       |
| 19 | 14063731 | 14064046 | KD2-H4K8ac_peak_14980 | 12.22449 | PODNL1_ENSG00000132000;DCAF15_ENSG00000132017       |
| 19 | 14096794 | 14098083 | KD2-H4K8ac_peak_14981 | 16.71655 |                                                     |
| 19 | 14104257 | 14104496 | KD2-H4K8ac_peak_14982 | 9.1707   |                                                     |
| 19 | 14116810 | 14117021 | KD2-H4K8ac_peak_14983 | 7.47462  | RFX1_ENSG00000132005                                |
| 19 | 14117587 | 14118553 | KD2-H4K8ac_peak_14984 | 17.27647 | RFX1_ENSG00000132005                                |
| 19 | 14142572 | 14143012 | KD2-H4K8ac_peak_14985 | 9.95119  | CTB-55O6.4_ENSG00000267670;IL27RA_ENSG00000104998   |
| 19 | 14168164 | 14168378 | KD2-H4K8ac_peak_14986 | 10.05606 |                                                     |
| 19 | 14182488 | 14183016 | KD2-H4K8ac_peak_14987 | 12.82393 | hsa-mir-1199_ENSG00000141854                        |
| 19 | 14191808 | 14192026 | KD2-H4K8ac_peak_14988 | 6.0605   |                                                     |
| 19 | 14202023 | 14202369 | KD2-H4K8ac_peak_14989 | 8.30974  | SAMD1_ENSG00000141858                               |
| 19 | 14229022 | 14229614 | KD2-H4K8ac_peak_14990 | 10.04868 | PRKACA_ENSG00000072062;CTB-55O6.10_ENSG00000267783  |
| 19 | 14248064 | 14248412 | KD2-H4K8ac_peak_14991 | 8.2413   | ASF1B_ENSG00000105011;CTB-55O6.12_ENSG00000267169   |
| 19 | 14261203 | 14261537 | KD2-H4K8ac_peak_14992 | 5.57044  |                                                     |
| 19 | 14317802 | 14318831 | KD2-H4K8ac_peak_14993 | 19.8737  | LPHN1_ENSG00000072071                               |
| 19 | 14320041 | 14320894 | KD2-H4K8ac_peak_14994 | 18.94636 |                                                     |

|    |          |          |                       |          |                                                  |
|----|----------|----------|-----------------------|----------|--------------------------------------------------|
| 19 | 14358664 | 14359257 | KD2-H4K8ac_peak_14995 | 13.73635 |                                                  |
| 19 | 14359562 | 14360393 | KD2-H4K8ac_peak_14996 | 37.97899 |                                                  |
| 19 | 14404007 | 14404351 | KD2-H4K8ac_peak_14997 | 6.56926  | CTD-2189E23.1_ENSG00000267723                    |
| 19 | 14477444 | 14477763 | KD2-H4K8ac_peak_14998 | 4.01115  |                                                  |
| 19 | 14490050 | 14490348 | KD2-H4K8ac_peak_14999 | 5.98764  | CD97_ENSG00000123146                             |
| 19 | 14492240 | 14492869 | KD2-H4K8ac_peak_15000 | 10.77651 | CD97_ENSG00000123146                             |
| 19 | 14494950 | 14495216 | KD2-H4K8ac_peak_15001 | 6.40683  |                                                  |
| 19 | 14529699 | 14530129 | KD2-H4K8ac_peak_15002 | 5.92591  | DDX39A_ENSG00000123136                           |
| 19 | 14530475 | 14531075 | KD2-H4K8ac_peak_15003 | 12.84642 | DDX39A_ENSG00000123136                           |
| 19 | 14543789 | 14544654 | KD2-H4K8ac_peak_15004 | 16.8435  | PKN1_ENSG00000123143                             |
| 19 | 14545206 | 14545604 | KD2-H4K8ac_peak_15005 | 7.70067  |                                                  |
| 19 | 14583437 | 14583749 | KD2-H4K8ac_peak_15006 | 5.30799  |                                                  |
| 19 | 14585846 | 14586116 | KD2-H4K8ac_peak_15007 | 11.90231 | PTGER1_ENSG00000160951                           |
| 19 | 14607338 | 14608084 | KD2-H4K8ac_peak_15008 | 11.31076 | GIPC1_ENSG00000123159                            |
| 19 | 14628833 | 14629164 | KD2-H4K8ac_peak_15009 | 11.24702 | TECR_ENSG00000099797                             |
| 19 | 14629607 | 14629877 | KD2-H4K8ac_peak_15010 | 9.36516  |                                                  |
| 19 | 14682438 | 14682849 | KD2-H4K8ac_peak_15011 | 13.80019 | NDUFB7_ENSG00000099795                           |
| 19 | 14800662 | 14800884 | KD2-H4K8ac_peak_15012 | 9.1707   | EMR3_ENSG00000131355;ZNF333_ENSG00000160961      |
| 19 | 15217572 | 15218427 | KD2-H4K8ac_peak_15013 | 8.1233   | SYDE1_ENSG00000105137                            |
| 19 | 15218624 | 15219082 | KD2-H4K8ac_peak_15014 | 9.11031  | SYDE1_ENSG00000105137                            |
| 19 | 15235696 | 15236461 | KD2-H4K8ac_peak_15015 | 8.10216  | AC003956.1_ENSG00000268564;ILVBL_ENSG00000105135 |
| 19 | 15237072 | 15237278 | KD2-H4K8ac_peak_15016 | 7.22936  | ILVBL_ENSG00000105135                            |
| 19 | 15306487 | 15306681 | KD2-H4K8ac_peak_15017 | 9.94337  |                                                  |
| 19 | 15310628 | 15312145 | KD2-H4K8ac_peak_15018 | 7.76329  | NOTCH3_ENSG00000074181                           |
| 19 | 15333566 | 15334040 | KD2-H4K8ac_peak_15019 | 10.05606 | AC004257.1_ENSG00000269635                       |
| 19 | 15334670 | 15334976 | KD2-H4K8ac_peak_15020 | 10.72313 |                                                  |
| 19 | 15442827 | 15443217 | KD2-H4K8ac_peak_15021 | 11.89502 | BRD4_ENSG00000141867                             |
| 19 | 15443468 | 15443766 | KD2-H4K8ac_peak_15022 | 10.29842 | BRD4_ENSG00000141867                             |
| 19 | 15490117 | 15490395 | KD2-H4K8ac_peak_15023 | 9.97578  | AKAP8_ENSG00000105127;AC005785.2_ENSG00000268189 |
| 19 | 15490930 | 15491546 | KD2-H4K8ac_peak_15024 | 11.89502 | AKAP8_ENSG00000105127                            |
| 19 | 15529403 | 15529766 | KD2-H4K8ac_peak_15025 | 7.76329  | AKAP8L_ENSG00000011243                           |
| 19 | 15543094 | 15543290 | KD2-H4K8ac_peak_15026 | 7.76329  |                                                  |
| 19 | 15544234 | 15544648 | KD2-H4K8ac_peak_15027 | 6.83936  |                                                  |
| 19 | 15559962 | 15560707 | KD2-H4K8ac_peak_15028 | 14.69247 | WIZ_ENSG00000011451;MIR1470_ENSG00000269782      |
| 19 | 15562571 | 15562903 | KD2-H4K8ac_peak_15029 | 5.88845  |                                                  |
| 19 | 15947478 | 15947811 | KD2-H4K8ac_peak_15030 | 5.9696   | AC004510.3_ENSG00000267308                       |
| 19 | 16186925 | 16187919 | KD2-H4K8ac_peak_15031 | 9.90914  |                                                  |
| 19 | 16188116 | 16189382 | KD2-H4K8ac_peak_15032 | 8.79106  |                                                  |
| 19 | 16221386 | 16222076 | KD2-H4K8ac_peak_15033 | 20.31556 | RAB8A_ENSG00000167461                            |
| 19 | 16222864 | 16223182 | KD2-H4K8ac_peak_15034 | 12.17278 | RAB8A_ENSG00000167461                            |
| 19 | 16295586 | 16295917 | KD2-H4K8ac_peak_15035 | 16.07006 | FAM32A_ENSG00000105058                           |
| 19 | 16296254 | 16296671 | KD2-H4K8ac_peak_15036 | 9.36516  | FAM32A_ENSG00000105058                           |
| 19 | 16308771 | 16309308 | KD2-H4K8ac_peak_15037 | 13.80019 | AP1M1_ENSG00000072958                            |
| 19 | 16567245 | 16567951 | KD2-H4K8ac_peak_15038 | 6.40683  |                                                  |
| 19 | 16568322 | 16569130 | KD2-H4K8ac_peak_15039 | 16.8435  |                                                  |
| 19 | 16583136 | 16583447 | KD2-H4K8ac_peak_15040 | 6.76298  | EPS15L1_ENSG00000127527                          |

|    |          |          |                       |          |                                                                           |
|----|----------|----------|-----------------------|----------|---------------------------------------------------------------------------|
| 19 | 16606624 | 16606899 | KD2-H4K8ac_peak_15041 | 16.3889  | CALR3_ENSG00000269058;C19orf44_ENSG00000105072                            |
| 19 | 16652860 | 16653242 | KD2-H4K8ac_peak_15042 | 13.70605 | CHERP_ENSG00000085872                                                     |
| 19 | 16653474 | 16653700 | KD2-H4K8ac_peak_15043 | 8.86099  | CHERP_ENSG00000085872                                                     |
| 19 | 16682776 | 16683174 | KD2-H4K8ac_peak_15044 | 9.96798  | SLC35E1_ENSG00000127526                                                   |
| 19 | 16699374 | 16699661 | KD2-H4K8ac_peak_15045 | 6.99815  | CTD-3222D19.5_ENSG00000269578                                             |
| 19 | 16738647 | 16738965 | KD2-H4K8ac_peak_15046 | 7.27716  | CTD-3222D19.2_ENSG00000141979;MED26_ENSG00000105085                       |
| 19 | 16739405 | 16740128 | KD2-H4K8ac_peak_15047 | 15.06766 | CTD-3222D19.2_ENSG00000141979;MED26_ENSG00000105085                       |
| 19 | 16771288 | 16771838 | KD2-H4K8ac_peak_15048 | 8.58725  | CTC-429P9.4_ENSG00000268790;SMIM7_ENSG00000214046;TMEM38A_ENSG00000072954 |
| 19 | 16809490 | 16809792 | KD2-H4K8ac_peak_15049 | 8.70735  |                                                                           |
| 19 | 16813266 | 16813491 | KD2-H4K8ac_peak_15050 | 7.36799  |                                                                           |
| 19 | 16935937 | 16936277 | KD2-H4K8ac_peak_15051 | 10.29344 |                                                                           |
| 19 | 16939742 | 16940916 | KD2-H4K8ac_peak_15052 | 10.0692  | SIN3B_ENSG00000127511                                                     |
| 19 | 17007107 | 17007394 | KD2-H4K8ac_peak_15053 | 6.66692  |                                                                           |
| 19 | 17185963 | 17186223 | KD2-H4K8ac_peak_15054 | 11.34353 | HAUS8_ENSG00000131351;MYO9B_ENSG00000099331                               |
| 19 | 17186691 | 17186934 | KD2-H4K8ac_peak_15055 | 6.34383  | HAUS8_ENSG00000131351;MYO9B_ENSG00000099331                               |
| 19 | 17236635 | 17237142 | KD2-H4K8ac_peak_15056 | 5.4779   |                                                                           |
| 19 | 17246926 | 17247927 | KD2-H4K8ac_peak_15057 | 10.05606 |                                                                           |
| 19 | 17325289 | 17326452 | KD2-H4K8ac_peak_15058 | 23.17589 | USE1_ENSG00000053501                                                      |
| 19 | 17336547 | 17336844 | KD2-H4K8ac_peak_15059 | 4.211    | OCEL1_ENSG00000099330                                                     |
| 19 | 17337467 | 17337737 | KD2-H4K8ac_peak_15060 | 7.40314  | OCEL1_ENSG00000099330                                                     |
| 19 | 17355736 | 17356660 | KD2-H4K8ac_peak_15061 | 8.28234  | NR2F6_ENSG00000160113                                                     |
| 19 | 17357039 | 17357908 | KD2-H4K8ac_peak_15062 | 13.31016 | NR2F6_ENSG00000160113                                                     |
| 19 | 17392247 | 17392626 | KD2-H4K8ac_peak_15063 | 9.48511  | USHBP1_ENSG00000130307;ANKLE1_ENSG00000160117                             |
| 19 | 17413925 | 17414142 | KD2-H4K8ac_peak_15064 | 5.75757  |                                                                           |
| 19 | 17414472 | 17414665 | KD2-H4K8ac_peak_15065 | 10.69383 |                                                                           |
| 19 | 17415609 | 17415948 | KD2-H4K8ac_peak_15066 | 6.62541  |                                                                           |
| 19 | 17416663 | 17417194 | KD2-H4K8ac_peak_15067 | 15.61313 |                                                                           |
| 19 | 17445109 | 17445545 | KD2-H4K8ac_peak_15068 | 18.33962 | ANO8_ENSG00000074855;GTPBP3_ENSG00000130299                               |
| 19 | 17457173 | 17457582 | KD2-H4K8ac_peak_15069 | 5.88845  |                                                                           |
| 19 | 17459234 | 17459898 | KD2-H4K8ac_peak_15070 | 7.38933  |                                                                           |
| 19 | 17506233 | 17506475 | KD2-H4K8ac_peak_15071 | 7.79898  |                                                                           |
| 19 | 17514542 | 17514921 | KD2-H4K8ac_peak_15072 | 6.94954  |                                                                           |
| 19 | 17530000 | 17530247 | KD2-H4K8ac_peak_15073 | 5.9696   | CTD-2521M24.4_ENSG00000254503;CTD-2521M24.8_ENSG00000269053               |
| 19 | 17530941 | 17531564 | KD2-H4K8ac_peak_15074 | 11.92978 | CTD-2521M24.8_ENSG00000269053                                             |
| 19 | 17558863 | 17559698 | KD2-H4K8ac_peak_15075 | 5.30799  | TMEM221_ENSG00000188051                                                   |
| 19 | 17580318 | 17580522 | KD2-H4K8ac_peak_15076 | 6.66692  | SLC27A1_ENSG00000130304                                                   |
| 19 | 17621864 | 17622125 | KD2-H4K8ac_peak_15077 | 9.63925  | CTD-3131K8.2_ENSG00000269439                                              |
| 19 | 17622452 | 17622987 | KD2-H4K8ac_peak_15078 | 20.18381 | CTD-3131K8.2_ENSG00000269439                                              |
| 19 | 17666552 | 17667187 | KD2-H4K8ac_peak_15079 | 11.05407 | COLGALT1_ENSG00000130309                                                  |
| 19 | 17716192 | 17716636 | KD2-H4K8ac_peak_15080 | 11.09936 |                                                                           |
| 19 | 17716931 | 17717174 | KD2-H4K8ac_peak_15081 | 21.2844  |                                                                           |
| 19 | 17798753 | 17798968 | KD2-H4K8ac_peak_15082 | 8.52559  | UNC13A_ENSG00000130477                                                    |
| 19 | 17799299 | 17799524 | KD2-H4K8ac_peak_15083 | 6.00226  | UNC13A_ENSG00000130477                                                    |
| 19 | 17829967 | 17830594 | KD2-H4K8ac_peak_15084 | 8.86099  | MAP1S_ENSG00000130479                                                     |
| 19 | 17858618 | 17859092 | KD2-H4K8ac_peak_15085 | 8.94469  | FCHO1_ENSG00000130475                                                     |
| 19 | 17905628 | 17906065 | KD2-H4K8ac_peak_15086 | 5.00278  | B3GNT3_ENSG00000179913                                                    |

|    |          |          |                       |          |                                                                          |
|----|----------|----------|-----------------------|----------|--------------------------------------------------------------------------|
| 19 | 17940761 | 17940977 | KD2-H4K8ac_peak_15087 | 5.30799  |                                                                          |
| 19 | 17941187 | 17941466 | KD2-H4K8ac_peak_15088 | 5.57044  |                                                                          |
| 19 | 17942033 | 17942385 | KD2-H4K8ac_peak_15089 | 7.47462  |                                                                          |
| 19 | 17952149 | 17952585 | KD2-H4K8ac_peak_15090 | 6.24114  |                                                                          |
| 19 | 17953217 | 17953690 | KD2-H4K8ac_peak_15091 | 9.08816  |                                                                          |
| 19 | 17958325 | 17958999 | KD2-H4K8ac_peak_15092 | 11.68645 | JAK3_ENSG00000105639                                                     |
| 19 | 17969953 | 17970309 | KD2-H4K8ac_peak_15093 | 7.1181   | RPL18A_ENSG00000105640                                                   |
| 19 | 17970762 | 17971361 | KD2-H4K8ac_peak_15094 | 12.93209 | RPL18A_ENSG00000105640                                                   |
| 19 | 17985335 | 17985557 | KD2-H4K8ac_peak_15095 | 5.88845  |                                                                          |
| 19 | 18042873 | 18044260 | KD2-H4K8ac_peak_15096 | 18.5703  | CCDC124_ENSG00000007080                                                  |
| 19 | 18061784 | 18062278 | KD2-H4K8ac_peak_15097 | 6.85193  | KCNN1_ENSG00000105642                                                    |
| 19 | 18062671 | 18063714 | KD2-H4K8ac_peak_15098 | 14.93224 | KCNN1_ENSG00000105642                                                    |
| 19 | 18111871 | 18112667 | KD2-H4K8ac_peak_15099 | 8.30974  | ARRDC2_ENSG00000105643                                                   |
| 19 | 18119077 | 18119409 | KD2-H4K8ac_peak_15100 | 11.2938  |                                                                          |
| 19 | 18130998 | 18131615 | KD2-H4K8ac_peak_15101 | 9.15069  |                                                                          |
| 19 | 18131829 | 18132121 | KD2-H4K8ac_peak_15102 | 5.64449  |                                                                          |
| 19 | 18132441 | 18132689 | KD2-H4K8ac_peak_15103 | 11.14658 | CTB-52I2.4_ENSG00000268032                                               |
| 19 | 18133268 | 18133807 | KD2-H4K8ac_peak_15104 | 5.01002  | CTB-52I2.4_ENSG00000268032                                               |
| 19 | 18220586 | 18221044 | KD2-H4K8ac_peak_15105 | 7.69287  |                                                                          |
| 19 | 18228836 | 18229036 | KD2-H4K8ac_peak_15106 | 6.90231  |                                                                          |
| 19 | 18262651 | 18263148 | KD2-H4K8ac_peak_15107 | 11.89502 | AC007192.6_ENSG00000269145;PIK3R2_ENSG00000105647;PIK3R2_ENSG00000268173 |
| 19 | 18264058 | 18264364 | KD2-H4K8ac_peak_15108 | 4.44527  | PIK3R2_ENSG00000105647;PIK3R2_ENSG00000268173                            |
| 19 | 18267460 | 18267812 | KD2-H4K8ac_peak_15109 | 9.07715  |                                                                          |
| 19 | 18268249 | 18268492 | KD2-H4K8ac_peak_15110 | 11.50346 |                                                                          |
| 19 | 18271853 | 18272239 | KD2-H4K8ac_peak_15111 | 11.92978 |                                                                          |
| 19 | 18284225 | 18284471 | KD2-H4K8ac_peak_15112 | 11.09936 | IFI30_ENSG00000216490                                                    |
| 19 | 18315626 | 18316317 | KD2-H4K8ac_peak_15113 | 12.08557 | RAB3A_ENSG00000105649;AC068499.10_ENSG00000268650                        |
| 19 | 18334747 | 18335293 | KD2-H4K8ac_peak_15114 | 18.95762 |                                                                          |
| 19 | 18335626 | 18336346 | KD2-H4K8ac_peak_15115 | 11.92978 |                                                                          |
| 19 | 18336631 | 18337186 | KD2-H4K8ac_peak_15116 | 7.69294  |                                                                          |
| 19 | 18343894 | 18344105 | KD2-H4K8ac_peak_15117 | 4.54006  |                                                                          |
| 19 | 18391907 | 18392188 | KD2-H4K8ac_peak_15118 | 4.84794  | JUND_ENSG00000130522;MIR3188_ENSG00000267959                             |
| 19 | 18392818 | 18393124 | KD2-H4K8ac_peak_15119 | 9.36665  | JUND_ENSG00000130522;MIR3188_ENSG00000267959                             |
| 19 | 18393350 | 18393845 | KD2-H4K8ac_peak_15120 | 4.44527  | JUND_ENSG00000130522;MIR3188_ENSG00000267959                             |
| 19 | 18402200 | 18403606 | KD2-H4K8ac_peak_15121 | 13.87818 |                                                                          |
| 19 | 18404119 | 18404717 | KD2-H4K8ac_peak_15122 | 15.81711 |                                                                          |
| 19 | 18414151 | 18414450 | KD2-H4K8ac_peak_15123 | 6.67474  |                                                                          |
| 19 | 18414938 | 18415162 | KD2-H4K8ac_peak_15124 | 5.54647  |                                                                          |
| 19 | 18415402 | 18416472 | KD2-H4K8ac_peak_15125 | 17.46467 |                                                                          |
| 19 | 18433294 | 18433842 | KD2-H4K8ac_peak_15126 | 15.01306 | LSM4_ENSG00000130520                                                     |
| 19 | 18434299 | 18434533 | KD2-H4K8ac_peak_15127 | 6.83936  | LSM4_ENSG00000130520                                                     |
| 19 | 18439961 | 18440217 | KD2-H4K8ac_peak_15128 | 7.94441  |                                                                          |
| 19 | 18450681 | 18450906 | KD2-H4K8ac_peak_15129 | 6.40297  | PGPEP1_ENSG00000130517                                                   |
| 19 | 18474406 | 18474641 | KD2-H4K8ac_peak_15130 | 6.95649  |                                                                          |
| 19 | 18475019 | 18475592 | KD2-H4K8ac_peak_15131 | 17.8868  |                                                                          |
| 19 | 18476174 | 18477061 | KD2-H4K8ac_peak_15132 | 10.87093 |                                                                          |

|    |          |          |                       |          |                                                                                                    |
|----|----------|----------|-----------------------|----------|----------------------------------------------------------------------------------------------------|
| 19 | 18479876 | 18480764 | KD2-H4K8ac_peak_15133 | 11.05467 |                                                                                                    |
| 19 | 18484224 | 18484825 | KD2-H4K8ac_peak_15134 | 8.79106  | GDF15_ENSG00000130513                                                                              |
| 19 | 18485024 | 18485371 | KD2-H4K8ac_peak_15135 | 4.79789  | GDF15_ENSG00000130513                                                                              |
| 19 | 18496863 | 18497059 | KD2-H4K8ac_peak_15136 | 5.9696   | MIR3189_ENSG00000264175                                                                            |
| 19 | 18499145 | 18499594 | KD2-H4K8ac_peak_15137 | 5.72327  |                                                                                                    |
| 19 | 18526479 | 18526730 | KD2-H4K8ac_peak_15138 | 4.211    |                                                                                                    |
| 19 | 18526983 | 18527716 | KD2-H4K8ac_peak_15139 | 6.0605   |                                                                                                    |
| 19 | 18527982 | 18528549 | KD2-H4K8ac_peak_15140 | 17.10757 |                                                                                                    |
| 19 | 18528761 | 18529212 | KD2-H4K8ac_peak_15141 | 11.92978 | SSBP4_ENSG00000130511                                                                              |
| 19 | 18529503 | 18530022 | KD2-H4K8ac_peak_15142 | 7.49599  | SSBP4_ENSG00000130511                                                                              |
| 19 | 18530259 | 18530767 | KD2-H4K8ac_peak_15143 | 7.73264  | SSBP4_ENSG00000130511                                                                              |
| 19 | 18539690 | 18540068 | KD2-H4K8ac_peak_15144 | 5.54647  |                                                                                                    |
| 19 | 18542795 | 18543010 | KD2-H4K8ac_peak_15145 | 7.40111  |                                                                                                    |
| 19 | 18543572 | 18544379 | KD2-H4K8ac_peak_15146 | 8.85813  |                                                                                                    |
| 19 | 18544595 | 18545197 | KD2-H4K8ac_peak_15147 | 8.26945  |                                                                                                    |
| 19 | 18547494 | 18547722 | KD2-H4K8ac_peak_15148 | 4.49003  |                                                                                                    |
| 19 | 18548492 | 18549747 | KD2-H4K8ac_peak_15149 | 11.03331 | ISYNA1_ENSG00000105655                                                                             |
| 19 | 18654631 | 18655254 | KD2-H4K8ac_peak_15150 | 17.86168 | FKBP8_ENSG00000105701                                                                              |
| 19 | 18668710 | 18668983 | KD2-H4K8ac_peak_15151 | 17.75427 | KXD1_ENSG00000105700                                                                               |
| 19 | 18699579 | 18699923 | KD2-H4K8ac_peak_15152 | 13.73635 | C19orf60_ENSG00000006015                                                                           |
| 19 | 18705371 | 18705987 | KD2-H4K8ac_peak_15153 | 6.65673  |                                                                                                    |
| 19 | 18723263 | 18724124 | KD2-H4K8ac_peak_15154 | 9.95119  |                                                                                                    |
| 19 | 18748131 | 18748329 | KD2-H4K8ac_peak_15155 | 5.51783  | KLHL26_ENSG00000167487                                                                             |
| 19 | 18788135 | 18788345 | KD2-H4K8ac_peak_15156 | 5.91443  |                                                                                                    |
| 19 | 18793994 | 18794258 | KD2-H4K8ac_peak_15157 | 11.43863 | CRTC1_ENSG00000105662                                                                              |
| 19 | 18854490 | 18854884 | KD2-H4K8ac_peak_15158 | 6.24114  |                                                                                                    |
| 19 | 18868115 | 18868453 | KD2-H4K8ac_peak_15159 | 7.47462  |                                                                                                    |
| 19 | 18872977 | 18873324 | KD2-H4K8ac_peak_15160 | 6.65673  |                                                                                                    |
| 19 | 18874566 | 18875486 | KD2-H4K8ac_peak_15161 | 6.66692  |                                                                                                    |
| 19 | 18906459 | 18906752 | KD2-H4K8ac_peak_15162 | 5.54647  |                                                                                                    |
| 19 | 18942145 | 18942527 | KD2-H4K8ac_peak_15163 | 9.96798  | UPF1_ENSG00000005007                                                                               |
| 19 | 18942828 | 18943106 | KD2-H4K8ac_peak_15164 | 11.92978 | UPF1_ENSG00000005007                                                                               |
| 19 | 18959775 | 18959995 | KD2-H4K8ac_peak_15165 | 7.20567  |                                                                                                    |
| 19 | 19029826 | 19030151 | KD2-H4K8ac_peak_15166 | 11.22681 | COPE_ENSG00000105669;DDX49_ENSG00000105671                                                         |
| 19 | 19050589 | 19051432 | KD2-H4K8ac_peak_15167 | 5.405    | HOMER3_ENSG00000051128;AC005932.1_ENSG00000269019                                                  |
| 19 | 19143907 | 19144831 | KD2-H4K8ac_peak_15168 | 12.84642 | SUGP2_ENSG00000064607;ARMC6_ENSG00000105676                                                        |
| 19 | 19248821 | 19249225 | KD2-H4K8ac_peak_15169 | 12.84642 | TMEM161A_ENSG00000064545                                                                           |
| 19 | 19256312 | 19256966 | KD2-H4K8ac_peak_15170 | 11.24702 |                                                                                                    |
| 19 | 19303031 | 19303322 | KD2-H4K8ac_peak_15171 | 18.95762 | MEF2BNB-MEF2B_ENSG00000064489;MEF2B_ENSG00000213999;MEF2BNB_ENSG00000254901;RFXANK_ENSG00000064490 |
| 19 | 19313825 | 19314084 | KD2-H4K8ac_peak_15172 | 7.27716  | NR2C2AP_ENSG00000184162                                                                            |
| 19 | 19431666 | 19432021 | KD2-H4K8ac_peak_15173 | 18.86697 | SUGP1_ENSG00000105705;MAU2_ENSG00000129933                                                         |
| 19 | 19495990 | 19496217 | KD2-H4K8ac_peak_15174 | 5.94405  | GATAD2A_ENSG00000167491                                                                            |
| 19 | 19497248 | 19497523 | KD2-H4K8ac_peak_15175 | 4.8485   | GATAD2A_ENSG00000167491                                                                            |
| 19 | 19516756 | 19517097 | KD2-H4K8ac_peak_15176 | 14.74047 |                                                                                                    |
| 19 | 19626187 | 19626799 | KD2-H4K8ac_peak_15177 | 14.4458  | TSSK6_ENSG00000178093;NDUFA13_ENSG00000186010;YJEFN3_ENSG00000250067;CTC-260F20.3_ENSG00000258674  |
| 19 | 19649220 | 19649430 | KD2-H4K8ac_peak_15178 | 5.20908  | CILP2_ENSG00000160161                                                                              |

|    |          |          |                       |          |                                                           |
|----|----------|----------|-----------------------|----------|-----------------------------------------------------------|
| 19 | 19651499 | 19652049 | KD2-H4K8ac_peak_15179 | 6.25869  |                                                           |
| 19 | 19657504 | 19657754 | KD2-H4K8ac_peak_15180 | 7.47462  |                                                           |
| 19 | 19738592 | 19739863 | KD2-H4K8ac_peak_15181 | 12.82393 | LPAR2_ENSG00000064547                                     |
| 19 | 19754074 | 19754693 | KD2-H4K8ac_peak_15182 | 6.66692  | GMIP_ENSG00000089639                                      |
| 19 | 19774223 | 19774480 | KD2-H4K8ac_peak_15183 | 14.27217 | ATP13A1_ENSG00000105726                                   |
| 19 | 19774687 | 19775470 | KD2-H4K8ac_peak_15184 | 12.99417 | ATP13A1_ENSG00000105726                                   |
| 19 | 19779639 | 19780219 | KD2-H4K8ac_peak_15185 | 9.95119  | ZNF101_ENSG00000181896                                    |
| 19 | 19843349 | 19843745 | KD2-H4K8ac_peak_15186 | 5.1707   | ZNF14_ENSG00000105708                                     |
| 19 | 19844564 | 19844761 | KD2-H4K8ac_peak_15187 | 7.76329  | ZNF14_ENSG00000105708                                     |
| 19 | 19887591 | 19887909 | KD2-H4K8ac_peak_15188 | 4.86324  | LINC00663_ENSG00000266904;CTC-559E9.6_ENSG00000267419     |
| 19 | 19932103 | 19932522 | KD2-H4K8ac_peak_15189 | 11.22681 | CTC-559E9.4_ENSG00000267581;ZNF506_ENSG00000081665        |
| 19 | 19976761 | 19977145 | KD2-H4K8ac_peak_15190 | 8.26945  | ZNF253_ENSG00000256771                                    |
| 19 | 19977402 | 19977596 | KD2-H4K8ac_peak_15191 | 9.11031  | ZNF253_ENSG00000256771                                    |
| 19 | 20011833 | 20012253 | KD2-H4K8ac_peak_15192 | 10.65724 | ZNF93_ENSG00000184635;AC007204.2_ENSG00000267268          |
| 19 | 20162465 | 20162845 | KD2-H4K8ac_peak_15193 | 9.1707   |                                                           |
| 19 | 20163357 | 20164115 | KD2-H4K8ac_peak_15194 | 8.17902  |                                                           |
| 19 | 20348896 | 20349166 | KD2-H4K8ac_peak_15195 | 11.09936 |                                                           |
| 19 | 20607261 | 20607695 | KD2-H4K8ac_peak_15196 | 9.8758   | ZNF826P_ENSG00000231205                                   |
| 19 | 20747979 | 20748514 | KD2-H4K8ac_peak_15197 | 3.97079  | ZNF737_ENSG00000237440                                    |
| 19 | 20844014 | 20844289 | KD2-H4K8ac_peak_15198 | 11.05467 | CTC-513N18.7_ENSG00000269110;ZNF626_ENSG00000188171       |
| 19 | 21106556 | 21106887 | KD2-H4K8ac_peak_15199 | 6.24747  | ZNF85_ENSG00000105750                                     |
| 19 | 21119811 | 21120066 | KD2-H4K8ac_peak_15200 | 8.1233   |                                                           |
| 19 | 21182777 | 21183167 | KD2-H4K8ac_peak_15201 | 12.40345 |                                                           |
| 19 | 21203041 | 21203256 | KD2-H4K8ac_peak_15202 | 9.36516  | ZNF430_ENSG00000118620                                    |
| 19 | 21265081 | 21265424 | KD2-H4K8ac_peak_15203 | 8.1233   | ZNF714_ENSG00000160352                                    |
| 19 | 21324897 | 21325288 | KD2-H4K8ac_peak_15204 | 9.15329  | ZNF431_ENSG00000196705                                    |
| 19 | 21511794 | 21512034 | KD2-H4K8ac_peak_15205 | 7.36799  | ZNF708_ENSG00000182141                                    |
| 19 | 21512645 | 21512845 | KD2-H4K8ac_peak_15206 | 3.72574  | ZNF708_ENSG00000182141                                    |
| 19 | 21541901 | 21542235 | KD2-H4K8ac_peak_15207 | 9.08816  | ZNF738_ENSG00000172687                                    |
| 19 | 21579985 | 21580320 | KD2-H4K8ac_peak_15208 | 4.86324  | ZNF493_ENSG00000196268                                    |
| 19 | 21688521 | 21688812 | KD2-H4K8ac_peak_15209 | 7.67504  |                                                           |
| 19 | 21949887 | 21950321 | KD2-H4K8ac_peak_15210 | 13.81781 | ZNF100_ENSG00000197020                                    |
| 19 | 22018375 | 22018938 | KD2-H4K8ac_peak_15211 | 12.99417 |                                                           |
| 19 | 22034582 | 22034831 | KD2-H4K8ac_peak_15212 | 7.76329  | ZNF43_ENSG00000198521                                     |
| 19 | 22816597 | 22816832 | KD2-H4K8ac_peak_15213 | 10.0692  | ZNF492_ENSG00000229676                                    |
| 19 | 23253436 | 23253717 | KD2-H4K8ac_peak_15214 | 11.81257 | CTD-2291D10.3_ENSG00000269543                             |
| 19 | 23257511 | 23257813 | KD2-H4K8ac_peak_15215 | 7.22457  | CTD-2291D10.4_ENSG00000267886;ZNF730_ENSG00000183850      |
| 19 | 23258052 | 23258683 | KD2-H4K8ac_peak_15216 | 10.0692  | CTD-2291D10.4_ENSG00000267886;ZNF730_ENSG00000183850      |
| 19 | 23432941 | 23433141 | KD2-H4K8ac_peak_15217 | 8.10216  | ZNF724P_ENSG00000196081                                   |
| 19 | 23456563 | 23456886 | KD2-H4K8ac_peak_15218 | 6.84261  | RP11-15H20.7_ENSG00000269107;RP11-15H20.6_ENSG00000213971 |
| 19 | 23598399 | 23598686 | KD2-H4K8ac_peak_15219 | 10.63441 | CTB-175P5.4_ENSG00000269416                               |
| 19 | 23599147 | 23599400 | KD2-H4K8ac_peak_15220 | 11.86708 | CTB-175P5.4_ENSG00000269416                               |
| 19 | 23869295 | 23869914 | KD2-H4K8ac_peak_15221 | 12.81138 | ZNF675_ENSG00000197372                                    |
| 19 | 23941056 | 23941569 | KD2-H4K8ac_peak_15222 | 6.25869  | ZNF681_ENSG00000196172                                    |
| 19 | 24097138 | 24097470 | KD2-H4K8ac_peak_15223 | 8.1233   | ZNF726_ENSG00000213967                                    |
| 19 | 24097780 | 24098108 | KD2-H4K8ac_peak_15224 | 4.211    | ZNF726_ENSG00000213967                                    |

|    |          |          |                       |          |                                                                                    |
|----|----------|----------|-----------------------|----------|------------------------------------------------------------------------------------|
| 19 | 24215558 | 24215827 | KD2-H4K8ac_peak_15225 | 6.61376  | CTD-2017D11.1_ENSG00000268362;ZNF254_ENSG00000213096                               |
| 19 | 24216353 | 24216672 | KD2-H4K8ac_peak_15226 | 6.40297  | CTD-2017D11.1_ENSG00000268362;ZNF254_ENSG00000213096                               |
| 19 | 24270087 | 24270481 | KD2-H4K8ac_peak_15227 | 9.55735  |                                                                                    |
| 19 | 28284048 | 28284253 | KD2-H4K8ac_peak_15228 | 7.47462  | LINC00662_ENSG00000261824;CTC-459F4.3_ENSG00000267575;LLNLF-65H9.1_ENSG00000272635 |
| 19 | 28284470 | 28285561 | KD2-H4K8ac_peak_15229 | 11.2938  | LINC00662_ENSG00000261824;CTC-459F4.3_ENSG00000267575;LLNLF-65H9.1_ENSG00000272635 |
| 19 | 30096422 | 30096925 | KD2-H4K8ac_peak_15230 | 6.29608  |                                                                                    |
| 19 | 30155942 | 30156156 | KD2-H4K8ac_peak_15231 | 12.82393 | PLEKHF1_ENSG00000166289                                                            |
| 19 | 30205837 | 30206685 | KD2-H4K8ac_peak_15232 | 11.24702 | C19orf12_ENSG00000131943                                                           |
| 19 | 30266453 | 30266693 | KD2-H4K8ac_peak_15233 | 5.15777  |                                                                                    |
| 19 | 30301910 | 30302567 | KD2-H4K8ac_peak_15234 | 16.8435  | CCNE1_ENSG00000105173                                                              |
| 19 | 30363945 | 30364802 | KD2-H4K8ac_peak_15235 | 18.64825 |                                                                                    |
| 19 | 30370283 | 30370533 | KD2-H4K8ac_peak_15236 | 5.14125  |                                                                                    |
| 19 | 30433553 | 30433846 | KD2-H4K8ac_peak_15237 | 8.1233   |                                                                                    |
| 19 | 30562194 | 30562584 | KD2-H4K8ac_peak_15238 | 6.0073   |                                                                                    |
| 19 | 30601425 | 30601713 | KD2-H4K8ac_peak_15239 | 4.77079  |                                                                                    |
| 19 | 30602519 | 30602864 | KD2-H4K8ac_peak_15240 | 15.66774 |                                                                                    |
| 19 | 30622979 | 30623872 | KD2-H4K8ac_peak_15241 | 7.83489  |                                                                                    |
| 19 | 30625444 | 30625776 | KD2-H4K8ac_peak_15242 | 6.2781   |                                                                                    |
| 19 | 30626017 | 30626844 | KD2-H4K8ac_peak_15243 | 10.29344 |                                                                                    |
| 19 | 30627981 | 30628527 | KD2-H4K8ac_peak_15244 | 8.75125  |                                                                                    |
| 19 | 30640765 | 30640963 | KD2-H4K8ac_peak_15245 | 4.66652  |                                                                                    |
| 19 | 30641179 | 30641411 | KD2-H4K8ac_peak_15246 | 4.98072  |                                                                                    |
| 19 | 30642493 | 30642717 | KD2-H4K8ac_peak_15247 | 5.14125  |                                                                                    |
| 19 | 30643540 | 30644299 | KD2-H4K8ac_peak_15248 | 19.25648 |                                                                                    |
| 19 | 30644710 | 30644934 | KD2-H4K8ac_peak_15249 | 7.47462  |                                                                                    |
| 19 | 30646421 | 30647155 | KD2-H4K8ac_peak_15250 | 9.89383  |                                                                                    |
| 19 | 30648109 | 30648419 | KD2-H4K8ac_peak_15251 | 6.85193  |                                                                                    |
| 19 | 30664836 | 30665205 | KD2-H4K8ac_peak_15252 | 7.79898  |                                                                                    |
| 19 | 30716945 | 30717317 | KD2-H4K8ac_peak_15253 | 13.6756  |                                                                                    |
| 19 | 30865704 | 30866447 | KD2-H4K8ac_peak_15254 | 7.47462  |                                                                                    |
| 19 | 31170502 | 31170709 | KD2-H4K8ac_peak_15255 | 6.1228   |                                                                                    |
| 19 | 31176645 | 31177112 | KD2-H4K8ac_peak_15256 | 4.97693  |                                                                                    |
| 19 | 31178048 | 31178339 | KD2-H4K8ac_peak_15257 | 7.27716  |                                                                                    |
| 19 | 31183494 | 31184232 | KD2-H4K8ac_peak_15258 | 11.2938  |                                                                                    |
| 19 | 31210280 | 31211459 | KD2-H4K8ac_peak_15259 | 15.5861  |                                                                                    |
| 19 | 31229982 | 31230240 | KD2-H4K8ac_peak_15260 | 5.08628  |                                                                                    |
| 19 | 31231237 | 31231538 | KD2-H4K8ac_peak_15261 | 7.27716  |                                                                                    |
| 19 | 31233510 | 31233774 | KD2-H4K8ac_peak_15262 | 10.05606 |                                                                                    |
| 19 | 31234168 | 31235035 | KD2-H4K8ac_peak_15263 | 11.05467 |                                                                                    |
| 19 | 31400040 | 31400363 | KD2-H4K8ac_peak_15264 | 6.99815  |                                                                                    |
| 19 | 31754253 | 31754513 | KD2-H4K8ac_peak_15265 | 5.14125  |                                                                                    |
| 19 | 31829711 | 31830773 | KD2-H4K8ac_peak_15266 | 6.99815  |                                                                                    |
| 19 | 31841166 | 31841661 | KD2-H4K8ac_peak_15267 | 11.89502 | TSHZ3_ENSG00000121297                                                              |
| 19 | 31872164 | 31872432 | KD2-H4K8ac_peak_15268 | 4.35346  |                                                                                    |
| 19 | 32596692 | 32597034 | KD2-H4K8ac_peak_15269 | 7.22457  | AC011518.1_ENSG00000267204                                                         |
| 19 | 32715145 | 32715470 | KD2-H4K8ac_peak_15270 | 4.42765  |                                                                                    |



|    |          |          |                       |          |                                                                                                               |
|----|----------|----------|-----------------------|----------|---------------------------------------------------------------------------------------------------------------|
| 19 | 32836203 | 32837316 | KD2-H4K8ac_peak_15271 | 22.46823 | ZNF507_ENSG00000168813                                                                                        |
| 19 | 32895515 | 32896230 | KD2-H4K8ac_peak_15272 | 11.55418 | AC007773.2_ENSG00000267213;AC007773.3_ENSG00000269093;DPY19L3_ENSG00000178904                                 |
| 19 | 32896752 | 32896971 | KD2-H4K8ac_peak_15273 | 8.16906  | AC007773.2_ENSG00000267213;AC007773.3_ENSG00000269093;DPY19L3_ENSG00000178904                                 |
| 19 | 33072202 | 33072521 | KD2-H4K8ac_peak_15274 | 14.80472 | PDCD5_ENSG00000105185                                                                                         |
| 19 | 33165585 | 33166054 | KD2-H4K8ac_peak_15275 | 6.76298  | RGS9BP_ENSG00000186326                                                                                        |
| 19 | 33182835 | 33183135 | KD2-H4K8ac_peak_15276 | 5.01002  | CTD-2538C1.2_ENSG00000267475;NUDT19_ENSG00000213965                                                           |
| 19 | 33183365 | 33183866 | KD2-H4K8ac_peak_15277 | 12.96672 | CTD-2538C1.2_ENSG00000267475;NUDT19_ENSG00000213965                                                           |
| 19 | 33555939 | 33556239 | KD2-H4K8ac_peak_15278 | 13.9234  | RHPN2_ENSG00000131941                                                                                         |
| 19 | 33571521 | 33572280 | KD2-H4K8ac_peak_15279 | 10.43145 | GPATCH1_ENSG00000076650                                                                                       |
| 19 | 33667398 | 33667747 | KD2-H4K8ac_peak_15280 | 9.20193  | AC008738.2_ENSG00000264355;LRP3_ENSG00000130881                                                               |
| 19 | 33684708 | 33685020 | KD2-H4K8ac_peak_15281 | 5.47943  |                                                                                                               |
| 19 | 33685909 | 33686186 | KD2-H4K8ac_peak_15282 | 6.13909  |                                                                                                               |
| 19 | 33717507 | 33717951 | KD2-H4K8ac_peak_15283 | 6.27931  | SLC7A10_ENSG00000130876                                                                                       |
| 19 | 33751767 | 33752026 | KD2-H4K8ac_peak_15284 | 8.94469  |                                                                                                               |
| 19 | 33764491 | 33764696 | KD2-H4K8ac_peak_15285 | 5.88845  |                                                                                                               |
| 19 | 33793134 | 33793388 | KD2-H4K8ac_peak_15286 | 5.92591  | CEBPA_ENSG00000245848;AC008738.1_ENSG00000230259;CTD-2540B15.7_ENSG00000267727;CEBPA-AS1_ENSG00000267296;CEBI |
| 19 | 33793738 | 33793974 | KD2-H4K8ac_peak_15287 | 4.33139  | CEBPA_ENSG00000245848;AC008738.1_ENSG00000230259;CEBPA-AS1_ENSG00000267296;CEBPA-AS1_ENSG00000178863          |
| 19 | 33864028 | 33864417 | KD2-H4K8ac_peak_15288 | 15.52826 | CEBPG_ENSG00000153879                                                                                         |
| 19 | 33864684 | 33865050 | KD2-H4K8ac_peak_15289 | 13.73635 | CEBPG_ENSG00000153879                                                                                         |
| 19 | 33925561 | 33928252 | KD2-H4K8ac_peak_15290 | 13.80019 |                                                                                                               |
| 19 | 33928680 | 33929679 | KD2-H4K8ac_peak_15291 | 10.05606 |                                                                                                               |
| 19 | 33994033 | 33994866 | KD2-H4K8ac_peak_15292 | 13.70753 |                                                                                                               |
| 19 | 33995251 | 33996539 | KD2-H4K8ac_peak_15293 | 17.34875 |                                                                                                               |
| 19 | 33998020 | 33998404 | KD2-H4K8ac_peak_15294 | 5.30799  |                                                                                                               |
| 19 | 33998745 | 33999208 | KD2-H4K8ac_peak_15295 | 8.18084  |                                                                                                               |
| 19 | 34012210 | 34012484 | KD2-H4K8ac_peak_15296 | 12.04009 | PEPD_ENSG00000124299                                                                                          |
| 19 | 34012903 | 34013382 | KD2-H4K8ac_peak_15297 | 5.54647  | PEPD_ENSG00000124299                                                                                          |
| 19 | 34175921 | 34176113 | KD2-H4K8ac_peak_15298 | 5.63428  |                                                                                                               |
| 19 | 34177410 | 34177703 | KD2-H4K8ac_peak_15299 | 5.405    |                                                                                                               |
| 19 | 34178022 | 34178245 | KD2-H4K8ac_peak_15300 | 8.10216  |                                                                                                               |
| 19 | 34178762 | 34179399 | KD2-H4K8ac_peak_15301 | 9.61895  |                                                                                                               |
| 19 | 34179910 | 34180861 | KD2-H4K8ac_peak_15302 | 7.1181   |                                                                                                               |
| 19 | 34215459 | 34215913 | KD2-H4K8ac_peak_15303 | 8.10216  |                                                                                                               |
| 19 | 34218766 | 34218992 | KD2-H4K8ac_peak_15304 | 6.25869  |                                                                                                               |
| 19 | 34285673 | 34286009 | KD2-H4K8ac_peak_15305 | 5.54647  | KCTD15_ENSG00000153885                                                                                        |
| 19 | 34286306 | 34286902 | KD2-H4K8ac_peak_15306 | 11.92978 | KCTD15_ENSG00000153885                                                                                        |
| 19 | 34287229 | 34287569 | KD2-H4K8ac_peak_15307 | 12.30509 | KCTD15_ENSG00000153885                                                                                        |
| 19 | 34287789 | 34288471 | KD2-H4K8ac_peak_15308 | 12.82202 | KCTD15_ENSG00000153885                                                                                        |
| 19 | 34353338 | 34353863 | KD2-H4K8ac_peak_15309 | 8.37231  |                                                                                                               |
| 19 | 34354231 | 34354569 | KD2-H4K8ac_peak_15310 | 4.42765  |                                                                                                               |
| 19 | 34359656 | 34360289 | KD2-H4K8ac_peak_15311 | 7.07117  |                                                                                                               |
| 19 | 34370810 | 34371300 | KD2-H4K8ac_peak_15312 | 15.25814 |                                                                                                               |
| 19 | 34396573 | 34397124 | KD2-H4K8ac_peak_15313 | 25.36636 |                                                                                                               |
| 19 | 34397382 | 34397693 | KD2-H4K8ac_peak_15314 | 7.67504  |                                                                                                               |
| 19 | 34624729 | 34624921 | KD2-H4K8ac_peak_15315 | 8.00457  |                                                                                                               |
| 19 | 34625501 | 34625955 | KD2-H4K8ac_peak_15316 | 17.25154 |                                                                                                               |

|    |          |          |                       |          |                                                                                                      |
|----|----------|----------|-----------------------|----------|------------------------------------------------------------------------------------------------------|
| 19 | 34662713 | 34663239 | KD2-H4K8ac_peak_15317 | 12.08081 | LSM14A_ENSG00000257103                                                                               |
| 19 | 34663436 | 34663981 | KD2-H4K8ac_peak_15318 | 24.52509 | LSM14A_ENSG00000257103                                                                               |
| 19 | 34745657 | 34746156 | KD2-H4K8ac_peak_15319 | 11.92978 | KIAA0355_ENSG00000166398                                                                             |
| 19 | 34797883 | 34798204 | KD2-H4K8ac_peak_15320 | 5.86783  |                                                                                                      |
| 19 | 34850409 | 34851019 | KD2-H4K8ac_peak_15321 | 10.77651 | AC010504.2_ENSG00000267219;GPI_ENSG00000105220                                                       |
| 19 | 34855557 | 34856504 | KD2-H4K8ac_peak_15322 | 13.73635 |                                                                                                      |
| 19 | 34894927 | 34895616 | KD2-H4K8ac_peak_15323 | 14.66631 | PDCD2L_ENSG00000126249                                                                               |
| 19 | 34918587 | 34919163 | KD2-H4K8ac_peak_15324 | 6.97919  | CTD-2588C8.8_ENSG00000267024;UBA2_ENSG00000126261                                                    |
| 19 | 35137045 | 35137299 | KD2-H4K8ac_peak_15325 | 7.76329  | SCGB2B3P_ENSG00000269811                                                                             |
| 19 | 35167715 | 35168398 | KD2-H4K8ac_peak_15326 | 5.75757  | AC020910.2_ENSG00000256383;ZNF302_ENSG00000089335                                                    |
| 19 | 35168665 | 35169097 | KD2-H4K8ac_peak_15327 | 9.57101  | AC020910.2_ENSG00000256383;ZNF302_ENSG00000089335                                                    |
| 19 | 35223832 | 35224639 | KD2-H4K8ac_peak_15328 | 6.97919  | ZNF181_ENSG00000197841                                                                               |
| 19 | 35225068 | 35225872 | KD2-H4K8ac_peak_15329 | 23.68363 | ZNF181_ENSG00000197841                                                                               |
| 19 | 35263724 | 35264038 | KD2-H4K8ac_peak_15330 | 9.89126  | ZNF599_ENSG00000153896                                                                               |
| 19 | 35454524 | 35455204 | KD2-H4K8ac_peak_15331 | 5.9696   | ZNF792_ENSG00000180884                                                                               |
| 19 | 35490533 | 35491029 | KD2-H4K8ac_peak_15332 | 9.11891  | CTD-2527I21.7_ENSG00000269303                                                                        |
| 19 | 35491319 | 35491894 | KD2-H4K8ac_peak_15333 | 17.70889 | CTD-2527I21.7_ENSG00000269303                                                                        |
| 19 | 35524869 | 35525166 | KD2-H4K8ac_peak_15334 | 5.88845  |                                                                                                      |
| 19 | 35584936 | 35585218 | KD2-H4K8ac_peak_15335 | 9.72244  |                                                                                                      |
| 19 | 35615134 | 35616468 | KD2-H4K8ac_peak_15336 | 18.80827 |                                                                                                      |
| 19 | 35626113 | 35626352 | KD2-H4K8ac_peak_15337 | 5.54647  |                                                                                                      |
| 19 | 35758093 | 35758978 | KD2-H4K8ac_peak_15338 | 10.96455 | USF2_ENSG00000105698                                                                                 |
| 19 | 35759486 | 35759758 | KD2-H4K8ac_peak_15339 | 15.22643 | USF2_ENSG00000105698                                                                                 |
| 19 | 35760159 | 35760475 | KD2-H4K8ac_peak_15340 | 11.05467 | USF2_ENSG00000105698                                                                                 |
| 19 | 36036187 | 36036846 | KD2-H4K8ac_peak_15341 | 11.92978 | AD000090.2_ENSG00000236144;TMEM147_ENSG00000105677                                                   |
| 19 | 36103069 | 36103458 | KD2-H4K8ac_peak_15342 | 11.3394  | AC002115.9_ENSG00000267626;HAUS5_ENSG00000249115                                                     |
| 19 | 36119261 | 36119673 | KD2-H4K8ac_peak_15343 | 9.08816  | RBM42_ENSG00000126254                                                                                |
| 19 | 36120043 | 36120261 | KD2-H4K8ac_peak_15344 | 8.10216  | RBM42_ENSG00000126254                                                                                |
| 19 | 36134009 | 36134655 | KD2-H4K8ac_peak_15345 | 17.42905 |                                                                                                      |
| 19 | 36134870 | 36135287 | KD2-H4K8ac_peak_15346 | 7.76329  |                                                                                                      |
| 19 | 36138534 | 36138833 | KD2-H4K8ac_peak_15347 | 8.33649  | COX6B1_ENSG00000126267                                                                               |
| 19 | 36192834 | 36193268 | KD2-H4K8ac_peak_15348 | 14.68449 |                                                                                                      |
| 19 | 36193581 | 36194095 | KD2-H4K8ac_peak_15349 | 5.88845  |                                                                                                      |
| 19 | 36206813 | 36207732 | KD2-H4K8ac_peak_15350 | 5.9696   |                                                                                                      |
| 19 | 36209062 | 36209429 | KD2-H4K8ac_peak_15351 | 5.01002  | KMT2B_ENSG00000105663;KMT2B_ENSG00000272333                                                          |
| 19 | 36231140 | 36231393 | KD2-H4K8ac_peak_15352 | 5.82799  |                                                                                                      |
| 19 | 36231807 | 36232210 | KD2-H4K8ac_peak_15353 | 5.13615  |                                                                                                      |
| 19 | 36235978 | 36236251 | KD2-H4K8ac_peak_15354 | 13.73635 | AD000671.6_ENSG00000267120;U2AF1L4_ENSG00000161265;PSENEN_ENSG00000205155;AC002398.9_ENSG00000188223 |
| 19 | 36236645 | 36237055 | KD2-H4K8ac_peak_15355 | 6.60096  | AD000671.6_ENSG00000267120;U2AF1L4_ENSG00000161265;PSENEN_ENSG00000205155;AC002398.9_ENSG00000188223 |
| 19 | 36247718 | 36248652 | KD2-H4K8ac_peak_15356 | 16.822   | HSPB6_ENSG00000004776;C19orf55_ENSG00000167595                                                       |
| 19 | 36249070 | 36249436 | KD2-H4K8ac_peak_15357 | 13.72842 | HSPB6_ENSG00000004776;C19orf55_ENSG00000167595                                                       |
| 19 | 36266466 | 36266923 | KD2-H4K8ac_peak_15358 | 8.59579  |                                                                                                      |
| 19 | 36358768 | 36359323 | KD2-H4K8ac_peak_15359 | 9.36516  | NPHS1_ENSG00000161270;APLP1_ENSG00000105290                                                          |
| 19 | 36359980 | 36360227 | KD2-H4K8ac_peak_15360 | 5.30799  | NPHS1_ENSG00000161270                                                                                |
| 19 | 36389604 | 36389984 | KD2-H4K8ac_peak_15361 | 6.40683  |                                                                                                      |
| 19 | 36391774 | 36392210 | KD2-H4K8ac_peak_15362 | 7.26089  | NFKBID_ENSG00000167604                                                                               |

|    |          |          |                       |          |                                                                              |
|----|----------|----------|-----------------------|----------|------------------------------------------------------------------------------|
| 19 | 36394407 | 36394685 | KD2-H4K8ac_peak_15363 | 6.66692  |                                                                              |
| 19 | 36426139 | 36426334 | KD2-H4K8ac_peak_15364 | 5.20908  | LRFN3_ENSG00000126243                                                        |
| 19 | 36426600 | 36427126 | KD2-H4K8ac_peak_15365 | 6.56211  | LRFN3_ENSG00000126243                                                        |
| 19 | 36427580 | 36427772 | KD2-H4K8ac_peak_15366 | 9.51688  |                                                                              |
| 19 | 36478577 | 36478826 | KD2-H4K8ac_peak_15367 | 5.57044  |                                                                              |
| 19 | 36484731 | 36485033 | KD2-H4K8ac_peak_15368 | 5.14125  |                                                                              |
| 19 | 36485718 | 36485917 | KD2-H4K8ac_peak_15369 | 8.83582  | SDHAF1_ENSG00000205138                                                       |
| 19 | 36486162 | 36486481 | KD2-H4K8ac_peak_15370 | 5.30799  | SDHAF1_ENSG00000205138                                                       |
| 19 | 36499365 | 36500892 | KD2-H4K8ac_peak_15371 | 14.8083  | SYNE4_ENSG00000181392                                                        |
| 19 | 36504636 | 36504873 | KD2-H4K8ac_peak_15372 | 5.75452  | AC002116.8_ENSG00000248101;ALKBH6_ENSG00000239382;AC002116.7_ENSG00000267698 |
| 19 | 36522913 | 36523681 | KD2-H4K8ac_peak_15373 | 7.94441  | CLIP3_ENSG00000105270                                                        |
| 19 | 36523932 | 36524162 | KD2-H4K8ac_peak_15374 | 10.86378 | CLIP3_ENSG00000105270                                                        |
| 19 | 36605209 | 36605599 | KD2-H4K8ac_peak_15375 | 6.65673  | POLR2I_ENSG00000105258;TBCB_ENSG00000105254                                  |
| 19 | 36606435 | 36606843 | KD2-H4K8ac_peak_15376 | 4.54006  | POLR2I_ENSG00000105258                                                       |
| 19 | 36630310 | 36630813 | KD2-H4K8ac_peak_15377 | 10.05081 | CAPNS1_ENSG00000126247                                                       |
| 19 | 36748219 | 36748959 | KD2-H4K8ac_peak_15378 | 9.96798  |                                                                              |
| 19 | 36822881 | 36823309 | KD2-H4K8ac_peak_15379 | 11.05407 | LINC00665_ENSG00000232677                                                    |
| 19 | 36870252 | 36870724 | KD2-H4K8ac_peak_15380 | 11.05467 | ZFP14_ENSG00000142065                                                        |
| 19 | 36908978 | 36909926 | KD2-H4K8ac_peak_15381 | 14.80472 | ZFP82_ENSG00000181007                                                        |
| 19 | 36979869 | 36980781 | KD2-H4K8ac_peak_15382 | 16.71655 | ZNF566_ENSG00000186017;CTD-2630F21.1_ENSG00000267309                         |
| 19 | 37064006 | 37064238 | KD2-H4K8ac_peak_15383 | 10.0692  | AC092295.7_ENSG00000233527                                                   |
| 19 | 37064516 | 37064749 | KD2-H4K8ac_peak_15384 | 11.89502 | AC092295.7_ENSG00000233527                                                   |
| 19 | 37095904 | 37096595 | KD2-H4K8ac_peak_15385 | 9.08816  | ZNF529_ENSG00000186020;ZNF382_ENSG00000161298                                |
| 19 | 37178564 | 37178780 | KD2-H4K8ac_peak_15386 | 9.1707   | AC074138.3_ENSG00000225975;ZNF567_ENSG00000189042                            |
| 19 | 37263489 | 37263951 | KD2-H4K8ac_peak_15387 | 8.55271  | ZNF850_ENSG00000267041;CTD-2162K18.4_ENSG00000267260                         |
| 19 | 37287786 | 37288046 | KD2-H4K8ac_peak_15388 | 5.93446  | CTD-2162K18.5_ENSG00000267254                                                |
| 19 | 37288471 | 37288800 | KD2-H4K8ac_peak_15389 | 11.05467 | CTD-2162K18.5_ENSG00000267254                                                |
| 19 | 37329016 | 37329870 | KD2-H4K8ac_peak_15390 | 11.05467 |                                                                              |
| 19 | 37406693 | 37407180 | KD2-H4K8ac_peak_15391 | 14.68449 | ZNF829_ENSG00000185869;ZNF568_ENSG00000198453                                |
| 19 | 37463370 | 37464314 | KD2-H4K8ac_peak_15392 | 16.71291 |                                                                              |
| 19 | 37569374 | 37569577 | KD2-H4K8ac_peak_15393 | 10.53377 | CTD-2293H3.2_ENSG00000267345                                                 |
| 19 | 37701889 | 37702083 | KD2-H4K8ac_peak_15394 | 10.29344 | CTC-454I21.3_ENSG00000267360                                                 |
| 19 | 37742854 | 37743068 | KD2-H4K8ac_peak_15395 | 12.84642 | AC012309.5_ENSG00000226686                                                   |
| 19 | 37794908 | 37795169 | KD2-H4K8ac_peak_15396 | 4.01115  |                                                                              |
| 19 | 37808882 | 37809098 | KD2-H4K8ac_peak_15397 | 8.30974  |                                                                              |
| 19 | 37825708 | 37825955 | KD2-H4K8ac_peak_15398 | 8.82366  |                                                                              |
| 19 | 37861388 | 37861746 | KD2-H4K8ac_peak_15399 | 5.75452  | ZNF527_ENSG00000189164                                                       |
| 19 | 37957890 | 37958302 | KD2-H4K8ac_peak_15400 | 6.65673  | ZNF570_ENSG00000171827                                                       |
| 19 | 37959267 | 37960778 | KD2-H4K8ac_peak_15401 | 19.85702 | ZNF569_ENSG00000196437;ZNF570_ENSG00000171827                                |
| 19 | 37996801 | 37997162 | KD2-H4K8ac_peak_15402 | 7.47462  | CTD-3064H18.1_ENSG00000266916;ZNF793_ENSG00000188227                         |
| 19 | 37997359 | 37997888 | KD2-H4K8ac_peak_15403 | 5.53033  | CTD-3064H18.1_ENSG00000266916;ZNF793_ENSG00000188227                         |
| 19 | 38041802 | 38042606 | KD2-H4K8ac_peak_15404 | 9.63487  | ZNF540_ENSG00000171817                                                       |
| 19 | 38145627 | 38146621 | KD2-H4K8ac_peak_15405 | 13.9234  |                                                                              |
| 19 | 38146820 | 38147170 | KD2-H4K8ac_peak_15406 | 8.85813  |                                                                              |
| 19 | 38182868 | 38183116 | KD2-H4K8ac_peak_15407 | 7.96322  | ZFP30_ENSG00000120784;ZNF781_ENSG00000196381                                 |
| 19 | 38210122 | 38210549 | KD2-H4K8ac_peak_15408 | 18.24717 | CTD-2528L19.4_ENSG00000267552;ZNF607_ENSG00000198182                         |

|    |          |          |                       |          |                                              |
|----|----------|----------|-----------------------|----------|----------------------------------------------|
| 19 | 38269855 | 38270060 | KD2-H4K8ac_peak_15409 | 7.47462  | CTD-2554C21.1_ENSG00000267422                |
| 19 | 38396907 | 38397155 | KD2-H4K8ac_peak_15410 | 8.82366  | WDR87_ENSG00000171804;SIP1L3_ENSG00000105738 |
| 19 | 38397477 | 38397702 | KD2-H4K8ac_peak_15411 | 13.50024 | WDR87_ENSG00000171804;SIP1L3_ENSG00000105738 |
| 19 | 38397936 | 38398200 | KD2-H4K8ac_peak_15412 | 10.0692  | WDR87_ENSG00000171804;SIP1L3_ENSG00000105738 |
| 19 | 38493645 | 38494010 | KD2-H4K8ac_peak_15413 | 8.55271  |                                              |
| 19 | 38494687 | 38495148 | KD2-H4K8ac_peak_15414 | 10.63441 |                                              |
| 19 | 38495895 | 38496481 | KD2-H4K8ac_peak_15415 | 8.17902  |                                              |
| 19 | 38644160 | 38644402 | KD2-H4K8ac_peak_15416 | 4.49003  |                                              |
| 19 | 38724687 | 38725054 | KD2-H4K8ac_peak_15417 | 13.12288 |                                              |
| 19 | 38741932 | 38742318 | KD2-H4K8ac_peak_15418 | 5.54647  |                                              |
| 19 | 38742529 | 38742727 | KD2-H4K8ac_peak_15419 | 10.12356 |                                              |
| 19 | 38746409 | 38747107 | KD2-H4K8ac_peak_15420 | 7.40111  | PPP1R14A_ENSG00000167641                     |
| 19 | 38755040 | 38755264 | KD2-H4K8ac_peak_15421 | 6.48713  |                                              |
| 19 | 38761292 | 38761576 | KD2-H4K8ac_peak_15422 | 3.75035  |                                              |
| 19 | 38779117 | 38779640 | KD2-H4K8ac_peak_15423 | 5.54647  | CTB-102L5.4_ENSG00000267748                  |
| 19 | 38810039 | 38811095 | KD2-H4K8ac_peak_15424 | 7.76104  | KCNK6_ENSG00000099337                        |
| 19 | 38812115 | 38812406 | KD2-H4K8ac_peak_15425 | 4.211    |                                              |
| 19 | 38864360 | 38865060 | KD2-H4K8ac_peak_15426 | 6.60096  | PSMD8_ENSG00000099341                        |
| 19 | 38865463 | 38865956 | KD2-H4K8ac_peak_15427 | 9.72244  | PSMD8_ENSG00000099341                        |
| 19 | 38877330 | 38877548 | KD2-H4K8ac_peak_15428 | 6.83936  |                                              |
| 19 | 38878116 | 38878580 | KD2-H4K8ac_peak_15429 | 7.76329  | GGN_ENSG00000179168;SPRED3_ENSG00000188766   |
| 19 | 38879367 | 38880026 | KD2-H4K8ac_peak_15430 | 9.96798  | GGN_ENSG00000179168;SPRED3_ENSG00000188766   |
| 19 | 38893872 | 38894860 | KD2-H4K8ac_peak_15431 | 10.43145 | FAM98C_ENSG00000130244                       |
| 19 | 38998258 | 38998494 | KD2-H4K8ac_peak_15432 | 9.76452  |                                              |
| 19 | 39005614 | 39006422 | KD2-H4K8ac_peak_15433 | 13.92307 |                                              |
| 19 | 39034260 | 39034591 | KD2-H4K8ac_peak_15434 | 9.90914  |                                              |
| 19 | 39055915 | 39056357 | KD2-H4K8ac_peak_15435 | 7.40314  |                                              |
| 19 | 39108516 | 39109538 | KD2-H4K8ac_peak_15436 | 11.24702 | EIF3K_ENSG00000178982;MAP4K1_ENSG00000104814 |
| 19 | 39137525 | 39137808 | KD2-H4K8ac_peak_15437 | 7.1181   | ACTN4_ENSG00000130402                        |
| 19 | 39183054 | 39183264 | KD2-H4K8ac_peak_15438 | 9.08816  | CTB-186G2.4_ENSG00000267375                  |
| 19 | 39226894 | 39227319 | KD2-H4K8ac_peak_15439 | 4.42765  |                                              |
| 19 | 39227782 | 39228291 | KD2-H4K8ac_peak_15440 | 5.7068   | CTD-2540F13.2_ENSG00000267892                |
| 19 | 39321860 | 39322400 | KD2-H4K8ac_peak_15441 | 8.30974  | ECH1_ENSG00000104823                         |
| 19 | 39340261 | 39340629 | KD2-H4K8ac_peak_15442 | 22.66567 |                                              |
| 19 | 39341425 | 39342337 | KD2-H4K8ac_peak_15443 | 6.99815  | HNRNPL_ENSG00000104824                       |
| 19 | 39342871 | 39343733 | KD2-H4K8ac_peak_15444 | 13.81781 | HNRNPL_ENSG00000104824                       |
| 19 | 39353989 | 39354282 | KD2-H4K8ac_peak_15445 | 4.42765  |                                              |
| 19 | 39359961 | 39360168 | KD2-H4K8ac_peak_15446 | 5.54647  | CTC-360G5.6_ENSG00000269050                  |
| 19 | 39368728 | 39368956 | KD2-H4K8ac_peak_15447 | 8.79106  | RINL_ENSG00000187994                         |
| 19 | 39408898 | 39409416 | KD2-H4K8ac_peak_15448 | 6.00226  |                                              |
| 19 | 39430331 | 39430532 | KD2-H4K8ac_peak_15449 | 5.57044  |                                              |
| 19 | 39465770 | 39466653 | KD2-H4K8ac_peak_15450 | 6.40297  | FBXO17_ENSG00000269190                       |
| 19 | 39466995 | 39467312 | KD2-H4K8ac_peak_15451 | 9.08816  | FBXO17_ENSG00000269190                       |
| 19 | 39522385 | 39522877 | KD2-H4K8ac_peak_15452 | 10.19949 | FBXO27_ENSG00000161243                       |
| 19 | 39523098 | 39523466 | KD2-H4K8ac_peak_15453 | 4.8888   | FBXO27_ENSG00000161243                       |
| 19 | 39616501 | 39616766 | KD2-H4K8ac_peak_15454 | 6.99815  | PAK4_ENSG00000130669                         |

|    |          |          |                       |          |                                                                               |
|----|----------|----------|-----------------------|----------|-------------------------------------------------------------------------------|
| 19 | 39630020 | 39630227 | KD2-H4K8ac_peak_15455 | 3.75035  |                                                                               |
| 19 | 39635767 | 39636200 | KD2-H4K8ac_peak_15456 | 7.08474  |                                                                               |
| 19 | 39658113 | 39658340 | KD2-H4K8ac_peak_15457 | 5.61067  |                                                                               |
| 19 | 39662978 | 39663366 | KD2-H4K8ac_peak_15458 | 6.57664  |                                                                               |
| 19 | 39687604 | 39687871 | KD2-H4K8ac_peak_15459 | 8.23062  | NCCRP1_ENSG00000188505                                                        |
| 19 | 39811055 | 39811514 | KD2-H4K8ac_peak_15460 | 7.47462  | CTC-246B18.8_ENSG00000268262                                                  |
| 19 | 39832174 | 39832522 | KD2-H4K8ac_peak_15461 | 5.54647  | GMFG_ENSG00000130755;CTC-246B18.10_ENSG00000269246;SAMD4B_ENSG00000179134     |
| 19 | 39881360 | 39881723 | KD2-H4K8ac_peak_15462 | 17.38513 | PAF1_ENSG00000006712;MED29_ENSG000000063322                                   |
| 19 | 39892616 | 39893788 | KD2-H4K8ac_peak_15463 | 11.79585 |                                                                               |
| 19 | 39893995 | 39894305 | KD2-H4K8ac_peak_15464 | 12.74183 |                                                                               |
| 19 | 39900062 | 39900957 | KD2-H4K8ac_peak_15465 | 22.21705 | MIR4530_ENSG00000266559                                                       |
| 19 | 39903278 | 39904017 | KD2-H4K8ac_peak_15466 | 7.59794  | PLEKHG2_ENSG00000090924                                                       |
| 19 | 39926225 | 39926586 | KD2-H4K8ac_peak_15467 | 7.76329  | RPS16_ENSG00000105193;SUPT5H_ENSG00000196235                                  |
| 19 | 39926900 | 39927191 | KD2-H4K8ac_peak_15468 | 6.30229  | RPS16_ENSG00000105193;SUPT5H_ENSG00000196235                                  |
| 19 | 39936294 | 39936663 | KD2-H4K8ac_peak_15469 | 5.34636  |                                                                               |
| 19 | 39970775 | 39971678 | KD2-H4K8ac_peak_15470 | 12.3187  | TIMM50_ENSG00000105197                                                        |
| 19 | 39988442 | 39988901 | KD2-H4K8ac_peak_15471 | 4.44527  | DLL3_ENSG00000090932                                                          |
| 19 | 39989693 | 39990054 | KD2-H4K8ac_peak_15472 | 9.1707   | DLL3_ENSG00000090932                                                          |
| 19 | 39997546 | 39998635 | KD2-H4K8ac_peak_15473 | 8.4716   |                                                                               |
| 19 | 40006077 | 40006593 | KD2-H4K8ac_peak_15474 | 4.91674  | SELV_ENSG00000186838                                                          |
| 19 | 40030132 | 40030756 | KD2-H4K8ac_peak_15475 | 11.24702 | EID2_ENSG00000176396                                                          |
| 19 | 40314802 | 40315043 | KD2-H4K8ac_peak_15476 | 4.76709  |                                                                               |
| 19 | 40315534 | 40315868 | KD2-H4K8ac_peak_15477 | 11.05407 |                                                                               |
| 19 | 40323913 | 40324141 | KD2-H4K8ac_peak_15478 | 5.01002  | DYRK1B_ENSG00000105204                                                        |
| 19 | 40324488 | 40324754 | KD2-H4K8ac_peak_15479 | 14.68449 | DYRK1B_ENSG00000105204                                                        |
| 19 | 40365999 | 40366725 | KD2-H4K8ac_peak_15480 | 9.96798  |                                                                               |
| 19 | 40476381 | 40476775 | KD2-H4K8ac_peak_15481 | 15.59774 | PSMC4_ENSG00000013275                                                         |
| 19 | 40477177 | 40477429 | KD2-H4K8ac_peak_15482 | 5.30799  | PSMC4_ENSG00000013275                                                         |
| 19 | 40487005 | 40487213 | KD2-H4K8ac_peak_15483 | 4.77079  |                                                                               |
| 19 | 40502460 | 40502809 | KD2-H4K8ac_peak_15484 | 5.14125  |                                                                               |
| 19 | 40503120 | 40503336 | KD2-H4K8ac_peak_15485 | 7.47462  |                                                                               |
| 19 | 40561644 | 40562071 | KD2-H4K8ac_peak_15486 | 12.23    | ZNF780B_ENSG00000128000                                                       |
| 19 | 40596430 | 40597142 | KD2-H4K8ac_peak_15487 | 11.24702 | AC005614.5_ENSG00000269749;ZNF780A_ENSG00000197782;AC005614.3_ENSG00000269296 |
| 19 | 40696510 | 40697562 | KD2-H4K8ac_peak_15488 | 8.1235   | MAP3K10_ENSG00000130758                                                       |
| 19 | 40698026 | 40698352 | KD2-H4K8ac_peak_15489 | 6.8713   | MAP3K10_ENSG00000130758                                                       |
| 19 | 40790483 | 40790696 | KD2-H4K8ac_peak_15490 | 5.54647  | AKT2_ENSG00000105221                                                          |
| 19 | 40791647 | 40792216 | KD2-H4K8ac_peak_15491 | 11.89502 | AKT2_ENSG00000105221                                                          |
| 19 | 40853251 | 40853457 | KD2-H4K8ac_peak_15492 | 8.84031  | C19orf47_ENSG00000160392;PLD3_ENSG00000105223                                 |
| 19 | 40909751 | 40910204 | KD2-H4K8ac_peak_15493 | 12.26331 |                                                                               |
| 19 | 40926821 | 40927126 | KD2-H4K8ac_peak_15494 | 9.95119  |                                                                               |
| 19 | 40927390 | 40927660 | KD2-H4K8ac_peak_15495 | 9.65086  |                                                                               |
| 19 | 40931464 | 40931710 | KD2-H4K8ac_peak_15496 | 11.79585 | SERTAD1_ENSG00000197019                                                       |
| 19 | 40938838 | 40940423 | KD2-H4K8ac_peak_15497 | 10.19949 |                                                                               |
| 19 | 40950919 | 40951306 | KD2-H4K8ac_peak_15498 | 5.53033  | SERTAD3_ENSG00000167565                                                       |
| 19 | 40973229 | 40973451 | KD2-H4K8ac_peak_15499 | 9.33782  |                                                                               |
| 19 | 41035454 | 41036805 | KD2-H4K8ac_peak_15500 | 14.8083  |                                                                               |

|    |          |          |                       |          |                                                |
|----|----------|----------|-----------------------|----------|------------------------------------------------|
| 19 | 41047253 | 41047492 | KD2-H4K8ac_peak_15501 | 8.30974  |                                                |
| 19 | 41054885 | 41055145 | KD2-H4K8ac_peak_15502 | 6.25869  |                                                |
| 19 | 41076011 | 41076354 | KD2-H4K8ac_peak_15503 | 5.20998  |                                                |
| 19 | 41081864 | 41082376 | KD2-H4K8ac_peak_15504 | 14.84212 | SHKBP1_ENSG00000160410                         |
| 19 | 41082801 | 41083299 | KD2-H4K8ac_peak_15505 | 8.80225  | SHKBP1_ENSG00000160410                         |
| 19 | 41107308 | 41107665 | KD2-H4K8ac_peak_15506 | 8.30974  |                                                |
| 19 | 41109716 | 41109936 | KD2-H4K8ac_peak_15507 | 6.20982  |                                                |
| 19 | 41115610 | 41115848 | KD2-H4K8ac_peak_15508 | 11.00372 |                                                |
| 19 | 41116243 | 41117755 | KD2-H4K8ac_peak_15509 | 5.54647  |                                                |
| 19 | 41169429 | 41169882 | KD2-H4K8ac_peak_15510 | 8.30974  |                                                |
| 19 | 41196845 | 41197141 | KD2-H4K8ac_peak_15511 | 4.91674  | NUMBL_ENSG00000105245                          |
| 19 | 41222128 | 41222607 | KD2-H4K8ac_peak_15512 | 4.06758  | ITPKC_ENSG00000086544                          |
| 19 | 41255123 | 41256339 | KD2-H4K8ac_peak_15513 | 11.60333 | SNRPA_ENSG00000077312                          |
| 19 | 41256757 | 41256996 | KD2-H4K8ac_peak_15514 | 17.8868  | C19orf54_ENSG00000188493;SNRPA_ENSG00000077312 |
| 19 | 41282958 | 41283262 | KD2-H4K8ac_peak_15515 | 7.01494  | RAB4B_ENSG00000167578                          |
| 19 | 41303624 | 41304052 | KD2-H4K8ac_peak_15516 | 4.211    |                                                |
| 19 | 41316657 | 41316911 | KD2-H4K8ac_peak_15517 | 4.42765  | CYP2T2P_ENSG00000233622                        |
| 19 | 41317159 | 41317733 | KD2-H4K8ac_peak_15518 | 16.32216 | CYP2T2P_ENSG00000233622                        |
| 19 | 41767929 | 41768305 | KD2-H4K8ac_peak_15519 | 9.02573  | HNRNPUL1_ENSG00000105323                       |
| 19 | 41769115 | 41769479 | KD2-H4K8ac_peak_15520 | 8.30974  | HNRNPUL1_ENSG00000105323                       |
| 19 | 41770300 | 41771071 | KD2-H4K8ac_peak_15521 | 14.99434 |                                                |
| 19 | 41815865 | 41816299 | KD2-H4K8ac_peak_15522 | 8.53092  | CCDC97_ENSG00000142039                         |
| 19 | 41829313 | 41829918 | KD2-H4K8ac_peak_15523 | 7.36799  |                                                |
| 19 | 41831566 | 41832359 | KD2-H4K8ac_peak_15524 | 12.97552 |                                                |
| 19 | 41837002 | 41837308 | KD2-H4K8ac_peak_15525 | 8.28994  |                                                |
| 19 | 41869022 | 41869555 | KD2-H4K8ac_peak_15526 | 14.93224 | B9D2_ENSG00000123810                           |
| 19 | 41870327 | 41870699 | KD2-H4K8ac_peak_15527 | 9.07715  | B9D2_ENSG00000123810                           |
| 19 | 41882332 | 41882646 | KD2-H4K8ac_peak_15528 | 12.46264 |                                                |
| 19 | 41903773 | 41904198 | KD2-H4K8ac_peak_15529 | 5.88845  | EXOSC5_ENSG00000077348                         |
| 19 | 41933059 | 41933286 | KD2-H4K8ac_peak_15530 | 8.98477  |                                                |
| 19 | 41933646 | 41934496 | KD2-H4K8ac_peak_15531 | 10.19949 | B3GNT8_ENSG00000177191                         |
| 19 | 41944929 | 41945808 | KD2-H4K8ac_peak_15532 | 11.05407 | ATP5SL_ENSG00000105341                         |
| 19 | 41946041 | 41946370 | KD2-H4K8ac_peak_15533 | 8.5781   | ATP5SL_ENSG00000105341                         |
| 19 | 42364360 | 42364863 | KD2-H4K8ac_peak_15534 | 14.80472 | RPS19_ENSG00000105372                          |
| 19 | 42386792 | 42387778 | KD2-H4K8ac_peak_15535 | 26.59744 | ARHGEF1_ENSG00000076928                        |
| 19 | 42443897 | 42445084 | KD2-H4K8ac_peak_15536 | 14.15075 |                                                |
| 19 | 42455833 | 42456171 | KD2-H4K8ac_peak_15537 | 5.88845  |                                                |
| 19 | 42463095 | 42463437 | KD2-H4K8ac_peak_15538 | 10.53377 | RABAC1_ENSG00000105404                         |
| 19 | 42497940 | 42498194 | KD2-H4K8ac_peak_15539 | 7.27716  |                                                |
| 19 | 42500530 | 42500977 | KD2-H4K8ac_peak_15540 | 16.93985 | ATP1A3_ENSG00000105409                         |
| 19 | 42501197 | 42501639 | KD2-H4K8ac_peak_15541 | 13.80019 | ATP1A3_ENSG00000105409                         |
| 19 | 42502544 | 42503369 | KD2-H4K8ac_peak_15542 | 8.17902  | ATP1A3_ENSG00000105409                         |
| 19 | 42572981 | 42573186 | KD2-H4K8ac_peak_15543 | 4.66652  | GRIK5_ENSG00000105737;ZNF574_ENSG00000105732   |
| 19 | 42573902 | 42574905 | KD2-H4K8ac_peak_15544 | 9.87284  | GRIK5_ENSG00000105737                          |
| 19 | 42579185 | 42579927 | KD2-H4K8ac_peak_15545 | 7.92775  |                                                |
| 19 | 42580404 | 42580608 | KD2-H4K8ac_peak_15546 | 5.13615  |                                                |

|    |          |          |                       |          |                                                                                |
|----|----------|----------|-----------------------|----------|--------------------------------------------------------------------------------|
| 19 | 42595404 | 42595608 | KD2-H4K8ac_peak_15547 | 7.12754  |                                                                                |
| 19 | 42633456 | 42633926 | KD2-H4K8ac_peak_15548 | 10.96455 |                                                                                |
| 19 | 42654058 | 42654425 | KD2-H4K8ac_peak_15549 | 3.97079  |                                                                                |
| 19 | 42654978 | 42655317 | KD2-H4K8ac_peak_15550 | 8.30974  |                                                                                |
| 19 | 42657877 | 42658126 | KD2-H4K8ac_peak_15551 | 9.26823  |                                                                                |
| 19 | 42658936 | 42659322 | KD2-H4K8ac_peak_15552 | 7.1181   |                                                                                |
| 19 | 42721359 | 42722327 | KD2-H4K8ac_peak_15553 | 15.09202 |                                                                                |
| 19 | 42746353 | 42746753 | KD2-H4K8ac_peak_15554 | 10.513   | AC006486.1_ENSG00000204957;GSK3A_ENSG00000105723                               |
| 19 | 42747042 | 42747314 | KD2-H4K8ac_peak_15555 | 11.88036 | AC006486.1_ENSG00000204957;GSK3A_ENSG00000105723                               |
| 19 | 42758063 | 42758898 | KD2-H4K8ac_peak_15556 | 9.03107  | AC006486.9_ENSG00000268643;ERF_ENSG00000105722                                 |
| 19 | 42759809 | 42760270 | KD2-H4K8ac_peak_15557 | 10.30284 | AC006486.9_ENSG00000268643;ERF_ENSG00000105722                                 |
| 19 | 42771860 | 42772249 | KD2-H4K8ac_peak_15558 | 10.65724 | CIC_ENSG00000079432                                                            |
| 19 | 42782074 | 42782356 | KD2-H4K8ac_peak_15559 | 6.22746  |                                                                                |
| 19 | 42784749 | 42785021 | KD2-H4K8ac_peak_15560 | 9.95119  |                                                                                |
| 19 | 42785333 | 42785771 | KD2-H4K8ac_peak_15561 | 10.7186  |                                                                                |
| 19 | 42786100 | 42786667 | KD2-H4K8ac_peak_15562 | 6.0605   |                                                                                |
| 19 | 42806068 | 42806721 | KD2-H4K8ac_peak_15563 | 3.90565  | PAFAH1B3_ENSG00000079462;PRR19_ENSG00000188368                                 |
| 19 | 42807343 | 42807751 | KD2-H4K8ac_peak_15564 | 8.30094  | PAFAH1B3_ENSG00000079462                                                       |
| 19 | 42817601 | 42818170 | KD2-H4K8ac_peak_15565 | 17.70889 | TMEM145_ENSG00000167619                                                        |
| 19 | 42900693 | 42900956 | KD2-H4K8ac_peak_15566 | 10.44656 | LIPE-AS1_ENSG00000213904                                                       |
| 19 | 42927287 | 42928252 | KD2-H4K8ac_peak_15567 | 13.65567 | CTB-50E14.4_ENSG00000268605                                                    |
| 19 | 43979222 | 43979422 | KD2-H4K8ac_peak_15568 | 8.30974  |                                                                                |
| 19 | 44008031 | 44008256 | KD2-H4K8ac_peak_15569 | 9.36516  | PHLDB3_ENSG00000176531                                                         |
| 19 | 44008585 | 44008985 | KD2-H4K8ac_peak_15570 | 6.40297  | PHLDB3_ENSG00000176531                                                         |
| 19 | 44036293 | 44037244 | KD2-H4K8ac_peak_15571 | 13.81781 |                                                                                |
| 19 | 44080879 | 44081317 | KD2-H4K8ac_peak_15572 | 5.14125  | PINLYP_ENSG00000234465                                                         |
| 19 | 44084899 | 44085474 | KD2-H4K8ac_peak_15573 | 4.86324  | XRCC1_ENSG00000073050                                                          |
| 19 | 44100612 | 44100823 | KD2-H4K8ac_peak_15574 | 6.20982  | IRGQ_ENSG00000167378;ZNF576_ENSG00000124444;SRRM5_ENSG00000226763              |
| 19 | 44123500 | 44124277 | KD2-H4K8ac_peak_15575 | 10.7186  | ZNF428_ENSG00000131116                                                         |
| 19 | 44143563 | 44143803 | KD2-H4K8ac_peak_15576 | 10.0692  | CADM4_ENSG00000105767                                                          |
| 19 | 44144211 | 44144628 | KD2-H4K8ac_peak_15577 | 4.37809  | CADM4_ENSG00000105767                                                          |
| 19 | 44174171 | 44174471 | KD2-H4K8ac_peak_15578 | 12.84642 | PLAUR_ENSG00000011422                                                          |
| 19 | 44237024 | 44237230 | KD2-H4K8ac_peak_15579 | 6.44277  |                                                                                |
| 19 | 44259326 | 44259691 | KD2-H4K8ac_peak_15580 | 10.17486 | SMG9_ENSG00000105771                                                           |
| 19 | 44259915 | 44260170 | KD2-H4K8ac_peak_15581 | 14.07373 | SMG9_ENSG00000105771                                                           |
| 19 | 44278318 | 44279155 | KD2-H4K8ac_peak_15582 | 8.28234  |                                                                                |
| 19 | 44281769 | 44282453 | KD2-H4K8ac_peak_15583 | 10.78136 |                                                                                |
| 19 | 44330921 | 44331339 | KD2-H4K8ac_peak_15584 | 15.22643 | LYPD5_ENSG00000159871;ZNF283_ENSG00000167637                                   |
| 19 | 44406079 | 44406413 | KD2-H4K8ac_peak_15585 | 12.57143 | ZNF404_ENSG00000176222;RP11-15A1.3_ENSG00000267058;RP11-15A1.2_ENSG00000267191 |
| 19 | 44439048 | 44439278 | KD2-H4K8ac_peak_15586 | 6.25869  | ZNF45_ENSG00000124459                                                          |
| 19 | 44439544 | 44439892 | KD2-H4K8ac_peak_15587 | 8.30974  | ZNF45_ENSG00000124459                                                          |
| 19 | 44455473 | 44455695 | KD2-H4K8ac_peak_15588 | 4.211    | ZNF221_ENSG00000159905                                                         |
| 19 | 44529011 | 44529339 | KD2-H4K8ac_peak_15589 | 10.05606 | AC067968.3_ENSG00000267144;ZNF222_ENSG00000159885;ZNF223_ENSG00000267022       |
| 19 | 44529581 | 44529804 | KD2-H4K8ac_peak_15590 | 9.89126  | AC067968.3_ENSG00000267144;ZNF222_ENSG00000159885;ZNF223_ENSG00000267022       |
| 19 | 44555293 | 44555850 | KD2-H4K8ac_peak_15591 | 8.5092   | ZNF223_ENSG00000178386                                                         |
| 19 | 44576422 | 44576813 | KD2-H4K8ac_peak_15592 | 7.13615  | ZNF284_ENSG00000186026                                                         |

|    |          |          |                       |          |                                                      |
|----|----------|----------|-----------------------|----------|------------------------------------------------------|
| 19 | 44617647 | 44618142 | KD2-H4K8ac_peak_15593 | 9.16531  | AC084219.4_ENSG00000186019                           |
| 19 | 44645748 | 44645943 | KD2-H4K8ac_peak_15594 | 5.13615  | ZNF234_ENSG00000263002                               |
| 19 | 44669264 | 44669585 | KD2-H4K8ac_peak_15595 | 18.78112 | ZNF226_ENSG00000167380                               |
| 19 | 44711314 | 44712005 | KD2-H4K8ac_peak_15596 | 9.36516  | ZNF227_ENSG00000131115                               |
| 19 | 44716083 | 44716336 | KD2-H4K8ac_peak_15597 | 8.00457  |                                                      |
| 19 | 44860224 | 44860767 | KD2-H4K8ac_peak_15598 | 10.05606 |                                                      |
| 19 | 44906293 | 44906664 | KD2-H4K8ac_peak_15599 | 5.57044  | CTC-512J12.6_ENSG00000267173;ZNF285_ENSG00000267508  |
| 19 | 44952249 | 44952633 | KD2-H4K8ac_peak_15600 | 17.14886 | CTC-512J12.4_ENSG00000267188;ZNF229_ENSG00000167383  |
| 19 | 45004318 | 45005367 | KD2-H4K8ac_peak_15601 | 26.77453 | ZNF180_ENSG00000167384                               |
| 19 | 45146425 | 45147401 | KD2-H4K8ac_peak_15602 | 14.8083  | PVR_ENSG00000073008                                  |
| 19 | 45349591 | 45349850 | KD2-H4K8ac_peak_15603 | 5.13615  | PVRL2_ENSG00000130202                                |
| 19 | 45394557 | 45394969 | KD2-H4K8ac_peak_15604 | 7.92775  | CTB-129P6.4_ENSG00000267282;TOMM40_ENSG00000130204   |
| 19 | 45408721 | 45409245 | KD2-H4K8ac_peak_15605 | 6.25869  | APOE_ENSG00000130203                                 |
| 19 | 45414408 | 45414632 | KD2-H4K8ac_peak_15606 | 5.71749  |                                                      |
| 19 | 45417698 | 45418361 | KD2-H4K8ac_peak_15607 | 8.4716   | APOC1_ENSG00000130208                                |
| 19 | 45429797 | 45430808 | KD2-H4K8ac_peak_15608 | 10.43145 | APOC1P1_ENSG00000214855                              |
| 19 | 45454665 | 45454891 | KD2-H4K8ac_peak_15609 | 7.76335  |                                                      |
| 19 | 45457982 | 45458443 | KD2-H4K8ac_peak_15610 | 7.76329  | CTB-129P6.11_ENSG00000267114;CLPTM1_ENSG00000104853  |
| 19 | 45458755 | 45459052 | KD2-H4K8ac_peak_15611 | 7.07117  | CLPTM1_ENSG00000104853                               |
| 19 | 45541552 | 45542162 | KD2-H4K8ac_peak_15612 | 14.8083  | CLASRP_ENSG00000104859                               |
| 19 | 45542366 | 45542677 | KD2-H4K8ac_peak_15613 | 11.60333 | CLASRP_ENSG00000104859                               |
| 19 | 45581914 | 45582326 | KD2-H4K8ac_peak_15614 | 9.48012  | GEMIN7_ENSG00000142252;MARK4_ENSG00000007047         |
| 19 | 45582585 | 45583034 | KD2-H4K8ac_peak_15615 | 6.65673  | GEMIN7_ENSG00000142252;MARK4_ENSG00000007047         |
| 19 | 45594242 | 45594663 | KD2-H4K8ac_peak_15616 | 11.89502 | CTB-179K24.3_ENSG00000267348;PPP1R37_ENSG00000104866 |
| 19 | 45595553 | 45596004 | KD2-H4K8ac_peak_15617 | 7.40111  | PPP1R37_ENSG00000104866                              |
| 19 | 45639785 | 45640277 | KD2-H4K8ac_peak_15618 | 11.84007 | AC005757.6_ENSG00000267044                           |
| 19 | 45664974 | 45665383 | KD2-H4K8ac_peak_15619 | 6.40683  |                                                      |
| 19 | 45682499 | 45682831 | KD2-H4K8ac_peak_15620 | 6.66692  | BLOC1S3_ENSG00000189114;AC005779.2_ENSG00000267545   |
| 19 | 45751654 | 45752213 | KD2-H4K8ac_peak_15621 | 7.40111  |                                                      |
| 19 | 45753783 | 45754398 | KD2-H4K8ac_peak_15622 | 5.01002  |                                                      |
| 19 | 45779426 | 45779744 | KD2-H4K8ac_peak_15623 | 3.75035  |                                                      |
| 19 | 45814929 | 45815226 | KD2-H4K8ac_peak_15624 | 6.0073   |                                                      |
| 19 | 45826662 | 45827409 | KD2-H4K8ac_peak_15625 | 12.06346 | CKM_ENSG00000104879                                  |
| 19 | 45874244 | 45874590 | KD2-H4K8ac_peak_15626 | 7.36799  | ERCC2_ENSG00000104884                                |
| 19 | 45895125 | 45895365 | KD2-H4K8ac_peak_15627 | 3.87368  |                                                      |
| 19 | 45905993 | 45906232 | KD2-H4K8ac_peak_15628 | 5.21139  |                                                      |
| 19 | 45908052 | 45908673 | KD2-H4K8ac_peak_15629 | 10.08707 | PPP1R13L_ENSG00000104881;CD3EAP_ENSG00000117877      |
| 19 | 45926303 | 45926655 | KD2-H4K8ac_peak_15630 | 5.30799  |                                                      |
| 19 | 45927436 | 45927840 | KD2-H4K8ac_peak_15631 | 13.87818 |                                                      |
| 19 | 45931739 | 45932331 | KD2-H4K8ac_peak_15632 | 10.43145 |                                                      |
| 19 | 45942898 | 45943399 | KD2-H4K8ac_peak_15633 | 10.7186  |                                                      |
| 19 | 45943628 | 45943841 | KD2-H4K8ac_peak_15634 | 6.25869  |                                                      |
| 19 | 45946934 | 45947204 | KD2-H4K8ac_peak_15635 | 8.85813  |                                                      |
| 19 | 45947743 | 45947957 | KD2-H4K8ac_peak_15636 | 7.47462  |                                                      |
| 19 | 45953575 | 45953862 | KD2-H4K8ac_peak_15637 | 6.25869  |                                                      |
| 19 | 45959184 | 45959664 | KD2-H4K8ac_peak_15638 | 13.73635 |                                                      |



|    |          |          |                       |          |                                                                         |
|----|----------|----------|-----------------------|----------|-------------------------------------------------------------------------|
| 19 | 45970512 | 45970885 | KD2-H4K8ac_peak_15639 | 12.08081 | FOSB_ENSG00000125740                                                    |
| 19 | 45988827 | 45989135 | KD2-H4K8ac_peak_15640 | 22.21127 |                                                                         |
| 19 | 45999888 | 46000184 | KD2-H4K8ac_peak_15641 | 17.07338 | RTN2_ENSG00000125744                                                    |
| 19 | 46000490 | 46000757 | KD2-H4K8ac_peak_15642 | 8.98477  | RTN2_ENSG00000125744                                                    |
| 19 | 46009134 | 46009401 | KD2-H4K8ac_peak_15643 | 4.42765  | VASP_ENSG00000125753                                                    |
| 19 | 46010304 | 46010554 | KD2-H4K8ac_peak_15644 | 5.53033  | VASP_ENSG00000125753                                                    |
| 19 | 46010770 | 46011066 | KD2-H4K8ac_peak_15645 | 15.25274 | VASP_ENSG00000125753                                                    |
| 19 | 46012860 | 46013075 | KD2-H4K8ac_peak_15646 | 6.19483  |                                                                         |
| 19 | 46086950 | 46087484 | KD2-H4K8ac_peak_15647 | 6.85193  |                                                                         |
| 19 | 46087812 | 46088053 | KD2-H4K8ac_peak_15648 | 19.43192 |                                                                         |
| 19 | 46088414 | 46088627 | KD2-H4K8ac_peak_15649 | 5.45396  |                                                                         |
| 19 | 46110191 | 46110547 | KD2-H4K8ac_peak_15650 | 6.20982  |                                                                         |
| 19 | 46110911 | 46111198 | KD2-H4K8ac_peak_15651 | 8.58069  |                                                                         |
| 19 | 46118980 | 46119211 | KD2-H4K8ac_peak_15652 | 7.76329  |                                                                         |
| 19 | 46119572 | 46119903 | KD2-H4K8ac_peak_15653 | 18.25771 |                                                                         |
| 19 | 46136139 | 46136584 | KD2-H4K8ac_peak_15654 | 12.86276 |                                                                         |
| 19 | 46148380 | 46148692 | KD2-H4K8ac_peak_15655 | 15.69839 | EML2_ENSG00000125746                                                    |
| 19 | 46149085 | 46149279 | KD2-H4K8ac_peak_15656 | 5.45396  | EML2_ENSG00000125746                                                    |
| 19 | 46174456 | 46174665 | KD2-H4K8ac_peak_15657 | 9.1707   |                                                                         |
| 19 | 46180949 | 46181553 | KD2-H4K8ac_peak_15658 | 11.68645 |                                                                         |
| 19 | 46184525 | 46185166 | KD2-H4K8ac_peak_15659 | 6.99815  |                                                                         |
| 19 | 46234471 | 46235250 | KD2-H4K8ac_peak_15660 | 14.15075 | FBXO46_ENSG00000177051                                                  |
| 19 | 46271400 | 46271810 | KD2-H4K8ac_peak_15661 | 5.30799  | SIX5_ENSG00000177045;AC074212.6_ENSG00000267395                         |
| 19 | 46273071 | 46273343 | KD2-H4K8ac_peak_15662 | 9.93893  | SIX5_ENSG00000177045                                                    |
| 19 | 46295526 | 46295973 | KD2-H4K8ac_peak_15663 | 14.68449 | DMWD_ENSG00000185800                                                    |
| 19 | 46318943 | 46320248 | KD2-H4K8ac_peak_15664 | 12.84642 | RSPH6A_ENSG00000104941                                                  |
| 19 | 46366678 | 46367911 | KD2-H4K8ac_peak_15665 | 10.43145 | SYMPK_ENSG00000125755;FOXA3_ENSG00000170608                             |
| 19 | 46388929 | 46389853 | KD2-H4K8ac_peak_15666 | 10.96455 | IRF2BP1_ENSG00000170604                                                 |
| 19 | 46390216 | 46390746 | KD2-H4K8ac_peak_15667 | 10.19949 | IRF2BP1_ENSG00000170604                                                 |
| 19 | 46406185 | 46406633 | KD2-H4K8ac_peak_15668 | 13.95627 | MYPOP_ENSG00000176182                                                   |
| 19 | 46431287 | 46431527 | KD2-H4K8ac_peak_15669 | 7.12754  |                                                                         |
| 19 | 46456246 | 46456465 | KD2-H4K8ac_peak_15670 | 4.9025   |                                                                         |
| 19 | 46497259 | 46497578 | KD2-H4K8ac_peak_15671 | 5.57044  | CCDC61_ENSG00000104983                                                  |
| 19 | 46502679 | 46503012 | KD2-H4K8ac_peak_15672 | 5.75757  |                                                                         |
| 19 | 46800493 | 46800804 | KD2-H4K8ac_peak_15673 | 4.86324  | HIF3A_ENSG00000124440                                                   |
| 19 | 46801719 | 46801988 | KD2-H4K8ac_peak_15674 | 11.02863 |                                                                         |
| 19 | 46804379 | 46804651 | KD2-H4K8ac_peak_15675 | 6.55628  |                                                                         |
| 19 | 46849765 | 46850069 | KD2-H4K8ac_peak_15676 | 7.67504  | PPP5C_ENSG00000011485                                                   |
| 19 | 46850410 | 46850680 | KD2-H4K8ac_peak_15677 | 9.26408  | PPP5C_ENSG00000011485                                                   |
| 19 | 46919385 | 46919774 | KD2-H4K8ac_peak_15678 | 11.5673  |                                                                         |
| 19 | 46990850 | 46991221 | KD2-H4K8ac_peak_15679 | 7.05051  |                                                                         |
| 19 | 46998820 | 46999379 | KD2-H4K8ac_peak_15680 | 9.6589   | PNMAL2_ENSG00000204851                                                  |
| 19 | 47049640 | 47049946 | KD2-H4K8ac_peak_15681 | 10.30284 |                                                                         |
| 19 | 47103492 | 47104161 | KD2-H4K8ac_peak_15682 | 9.95342  | PPP5D1_ENSG00000230510;AC011551.3_ENSG00000268423;CALM3_ENSG00000160014 |
| 19 | 47104644 | 47105055 | KD2-H4K8ac_peak_15683 | 11.05467 | PPP5D1_ENSG00000230510;AC011551.3_ENSG00000268423;CALM3_ENSG00000160014 |
| 19 | 47117292 | 47117491 | KD2-H4K8ac_peak_15684 | 9.51625  |                                                                         |

|    |          |          |                       |          |                                            |
|----|----------|----------|-----------------------|----------|--------------------------------------------|
| 19 | 47124380 | 47125166 | KD2-H4K8ac_peak_15685 | 13.3695  |                                            |
| 19 | 47125379 | 47125659 | KD2-H4K8ac_peak_15686 | 10.19949 |                                            |
| 19 | 47126877 | 47127621 | KD2-H4K8ac_peak_15687 | 7.67504  | PTGIR_ENSG00000160013                      |
| 19 | 47128525 | 47128856 | KD2-H4K8ac_peak_15688 | 7.36799  | PTGIR_ENSG00000160013                      |
| 19 | 47129051 | 47131320 | KD2-H4K8ac_peak_15689 | 8.85813  | PTGIR_ENSG00000160013                      |
| 19 | 47132298 | 47132953 | KD2-H4K8ac_peak_15690 | 8.55271  |                                            |
| 19 | 47133260 | 47133567 | KD2-H4K8ac_peak_15691 | 5.75757  |                                            |
| 19 | 47133769 | 47135699 | KD2-H4K8ac_peak_15692 | 12.57297 |                                            |
| 19 | 47136397 | 47136926 | KD2-H4K8ac_peak_15693 | 7.48958  |                                            |
| 19 | 47137825 | 47138533 | KD2-H4K8ac_peak_15694 | 12.44942 | GNG8_ENSG00000167414                       |
| 19 | 47142092 | 47142337 | KD2-H4K8ac_peak_15695 | 8.10216  |                                            |
| 19 | 47142634 | 47143446 | KD2-H4K8ac_peak_15696 | 8.88082  |                                            |
| 19 | 47143689 | 47143949 | KD2-H4K8ac_peak_15697 | 8.69797  |                                            |
| 19 | 47217200 | 47217570 | KD2-H4K8ac_peak_15698 | 8.4716   |                                            |
| 19 | 47217811 | 47218213 | KD2-H4K8ac_peak_15699 | 6.99815  |                                            |
| 19 | 47219269 | 47219480 | KD2-H4K8ac_peak_15700 | 4.67342  | PRKD2_ENSG00000105287                      |
| 19 | 47220510 | 47220890 | KD2-H4K8ac_peak_15701 | 14.19272 | PRKD2_ENSG00000105287                      |
| 19 | 47249346 | 47249670 | KD2-H4K8ac_peak_15702 | 16.57619 | STRN4_ENSG00000090372;FKRP_ENSG00000181027 |
| 19 | 47249897 | 47250220 | KD2-H4K8ac_peak_15703 | 8.10216  | STRN4_ENSG00000090372;FKRP_ENSG00000181027 |
| 19 | 47289683 | 47290029 | KD2-H4K8ac_peak_15704 | 9.1707   |                                            |
| 19 | 47290798 | 47291028 | KD2-H4K8ac_peak_15705 | 6.90231  | SLC1A5_ENSG00000105281                     |
| 19 | 47315945 | 47316801 | KD2-H4K8ac_peak_15706 | 10.96455 |                                            |
| 19 | 47332955 | 47333325 | KD2-H4K8ac_peak_15707 | 10.0692  |                                            |
| 19 | 47336873 | 47337393 | KD2-H4K8ac_peak_15708 | 5.14125  |                                            |
| 19 | 47337769 | 47338131 | KD2-H4K8ac_peak_15709 | 7.13615  |                                            |
| 19 | 47353799 | 47354062 | KD2-H4K8ac_peak_15710 | 8.55271  | AP2S1_ENSG00000042753                      |
| 19 | 47359875 | 47360117 | KD2-H4K8ac_peak_15711 | 6.66692  |                                            |
| 19 | 47363726 | 47364086 | KD2-H4K8ac_peak_15712 | 18.24798 |                                            |
| 19 | 47364369 | 47364587 | KD2-H4K8ac_peak_15713 | 11.20531 |                                            |
| 19 | 47461223 | 47461502 | KD2-H4K8ac_peak_15714 | 8.85813  |                                            |
| 19 | 47507208 | 47507543 | KD2-H4K8ac_peak_15715 | 4.42765  |                                            |
| 19 | 47516499 | 47517018 | KD2-H4K8ac_peak_15716 | 9.36516  |                                            |
| 19 | 47538517 | 47539025 | KD2-H4K8ac_peak_15717 | 5.88845  |                                            |
| 19 | 47539259 | 47539789 | KD2-H4K8ac_peak_15718 | 5.54647  |                                            |
| 19 | 47552377 | 47552695 | KD2-H4K8ac_peak_15719 | 10.0692  | TMEM160_ENSG00000130748                    |
| 19 | 47614159 | 47614575 | KD2-H4K8ac_peak_15720 | 6.84261  |                                            |
| 19 | 47614795 | 47616216 | KD2-H4K8ac_peak_15721 | 26.43146 | ZC3H4_ENSG00000130749;SAE1_ENSG00000142230 |
| 19 | 47616623 | 47616873 | KD2-H4K8ac_peak_15722 | 8.43115  | ZC3H4_ENSG00000130749;SAE1_ENSG00000142230 |
| 19 | 47714363 | 47714645 | KD2-H4K8ac_peak_15723 | 6.24747  |                                            |
| 19 | 47729827 | 47730404 | KD2-H4K8ac_peak_15724 | 17.43705 | MIR3191_ENSG00000265134                    |
| 19 | 47730764 | 47731798 | KD2-H4K8ac_peak_15725 | 14.8083  | MIR3191_ENSG00000265134                    |
| 19 | 47734586 | 47734884 | KD2-H4K8ac_peak_15726 | 6.65673  |                                            |
| 19 | 47743043 | 47743464 | KD2-H4K8ac_peak_15727 | 8.69797  |                                            |
| 19 | 47743666 | 47744440 | KD2-H4K8ac_peak_15728 | 9.1707   |                                            |
| 19 | 47747314 | 47747511 | KD2-H4K8ac_peak_15729 | 9.16531  |                                            |
| 19 | 47747777 | 47748079 | KD2-H4K8ac_peak_15730 | 11.60333 |                                            |

|    |          |          |                       |          |                                                    |
|----|----------|----------|-----------------------|----------|----------------------------------------------------|
| 19 | 47758234 | 47758507 | KD2-H4K8ac_peak_15731 | 6.66692  | CCDC9_ENSG00000105321                              |
| 19 | 47777666 | 47777867 | KD2-H4K8ac_peak_15732 | 11.48808 | PRR24_ENSG00000257704                              |
| 19 | 47852097 | 47852355 | KD2-H4K8ac_peak_15733 | 6.84261  | DHX34_ENSG00000134815                              |
| 19 | 47922363 | 47922623 | KD2-H4K8ac_peak_15734 | 8.4716   | MEIS3_ENSG00000105419                              |
| 19 | 47922979 | 47923499 | KD2-H4K8ac_peak_15735 | 9.89126  | MEIS3_ENSG00000105419                              |
| 19 | 47924389 | 47924868 | KD2-H4K8ac_peak_15736 | 7.76104  |                                                    |
| 19 | 47925188 | 47925758 | KD2-H4K8ac_peak_15737 | 5.57044  |                                                    |
| 19 | 47974846 | 47975043 | KD2-H4K8ac_peak_15738 | 8.55271  | SLC8A2_ENSG00000118160                             |
| 19 | 47987960 | 47988171 | KD2-H4K8ac_peak_15739 | 6.66692  | KPTN_ENSG00000118162;NAPA-AS1_ENSG00000268061      |
| 19 | 47996230 | 47996631 | KD2-H4K8ac_peak_15740 | 5.54647  |                                                    |
| 19 | 47997015 | 47997836 | KD2-H4K8ac_peak_15741 | 7.40314  |                                                    |
| 19 | 47998347 | 47998559 | KD2-H4K8ac_peak_15742 | 9.73431  |                                                    |
| 19 | 47998764 | 47999071 | KD2-H4K8ac_peak_15743 | 6.17833  |                                                    |
| 19 | 48018899 | 48019428 | KD2-H4K8ac_peak_15744 | 9.77606  | NAPA_ENSG00000105402                               |
| 19 | 48103891 | 48104511 | KD2-H4K8ac_peak_15745 | 12.88108 |                                                    |
| 19 | 48111463 | 48111835 | KD2-H4K8ac_peak_15746 | 10.65724 | CTD-2571L23.8_ENSG00000268746                      |
| 19 | 48221615 | 48223595 | KD2-H4K8ac_peak_15747 | 23.64558 |                                                    |
| 19 | 48226131 | 48226781 | KD2-H4K8ac_peak_15748 | 8.17902  |                                                    |
| 19 | 48233186 | 48233384 | KD2-H4K8ac_peak_15749 | 11.30637 |                                                    |
| 19 | 48233614 | 48234058 | KD2-H4K8ac_peak_15750 | 9.15329  |                                                    |
| 19 | 48246242 | 48247015 | KD2-H4K8ac_peak_15751 | 13.31016 |                                                    |
| 19 | 48248065 | 48248570 | KD2-H4K8ac_peak_15752 | 7.74292  |                                                    |
| 19 | 48280946 | 48281159 | KD2-H4K8ac_peak_15753 | 5.51783  | SEPW1_ENSG00000178980                              |
| 19 | 48281427 | 48282150 | KD2-H4K8ac_peak_15754 | 10.43145 | SEPW1_ENSG00000178980                              |
| 19 | 48613296 | 48614170 | KD2-H4K8ac_peak_15755 | 14.00658 | PLA2G4C_ENSG00000105499                            |
| 19 | 48673294 | 48673852 | KD2-H4K8ac_peak_15756 | 8.58725  | LIG1_ENSG00000105486;C19orf68_ENSG00000185453      |
| 19 | 48674121 | 48674408 | KD2-H4K8ac_peak_15757 | 7.59794  | LIG1_ENSG00000105486;C19orf68_ENSG00000185453      |
| 19 | 48758421 | 48758617 | KD2-H4K8ac_peak_15758 | 6.99815  | CARD8_ENSG00000105483;CTC-241F20.3_ENSG00000268001 |
| 19 | 48758961 | 48759180 | KD2-H4K8ac_peak_15759 | 10.19949 | CARD8_ENSG00000105483;CTC-241F20.3_ENSG00000268001 |
| 19 | 48774132 | 48774438 | KD2-H4K8ac_peak_15760 | 7.33266  | CTC-241F20.4_ENSG00000268186                       |
| 19 | 48775121 | 48775449 | KD2-H4K8ac_peak_15761 | 10.17486 | CTC-241F20.4_ENSG00000268186                       |
| 19 | 48794300 | 48794560 | KD2-H4K8ac_peak_15762 | 8.17902  |                                                    |
| 19 | 48824741 | 48825091 | KD2-H4K8ac_peak_15763 | 12.37731 | CCDC114_ENSG00000105479;EMP3_ENSG00000142227       |
| 19 | 48825424 | 48825772 | KD2-H4K8ac_peak_15764 | 7.40314  | CCDC114_ENSG00000105479;EMP3_ENSG00000142227       |
| 19 | 48833880 | 48834129 | KD2-H4K8ac_peak_15765 | 8.55271  |                                                    |
| 19 | 48836367 | 48836845 | KD2-H4K8ac_peak_15766 | 6.66692  |                                                    |
| 19 | 48837197 | 48837552 | KD2-H4K8ac_peak_15767 | 8.1718   |                                                    |
| 19 | 48866633 | 48867132 | KD2-H4K8ac_peak_15768 | 7.76104  | TMEM143_ENSG00000161558;SYNGR4_ENSG00000105467     |
| 19 | 48867671 | 48868316 | KD2-H4K8ac_peak_15769 | 11.75669 | TMEM143_ENSG00000161558;SYNGR4_ENSG00000105467     |
| 19 | 48874157 | 48874430 | KD2-H4K8ac_peak_15770 | 3.97079  |                                                    |
| 19 | 48876270 | 48876630 | KD2-H4K8ac_peak_15771 | 6.40297  |                                                    |
| 19 | 48893876 | 48894251 | KD2-H4K8ac_peak_15772 | 8.5092   | KDELR1_ENSG00000105438                             |
| 19 | 48896640 | 48897535 | KD2-H4K8ac_peak_15773 | 9.36516  | GRIN2D_ENSG00000105464                             |
| 19 | 48897916 | 48898156 | KD2-H4K8ac_peak_15774 | 5.54647  | GRIN2D_ENSG00000105464                             |
| 19 | 48899856 | 48900150 | KD2-H4K8ac_peak_15775 | 4.42765  |                                                    |
| 19 | 48901370 | 48902017 | KD2-H4K8ac_peak_15776 | 13.2669  |                                                    |

|    |          |          |                       |          |                                                     |
|----|----------|----------|-----------------------|----------|-----------------------------------------------------|
| 19 | 48903321 | 48903724 | KD2-H4K8ac_peak_15777 | 5.42867  |                                                     |
| 19 | 48922421 | 48923036 | KD2-H4K8ac_peak_15778 | 5.14125  |                                                     |
| 19 | 48947676 | 48948278 | KD2-H4K8ac_peak_15779 | 7.47462  | GRWD1_ENSG00000105447                               |
| 19 | 48949122 | 48949475 | KD2-H4K8ac_peak_15780 | 5.9696   | GRWD1_ENSG00000105447                               |
| 19 | 48971703 | 48972072 | KD2-H4K8ac_peak_15781 | 8.94469  | CTC-273B12.5_ENSG00000268530;CYTH2_ENSG00000105443  |
| 19 | 48972645 | 48972941 | KD2-H4K8ac_peak_15782 | 11.05155 | CTC-273B12.5_ENSG00000268530;CYTH2_ENSG00000105443  |
| 19 | 48973322 | 48973520 | KD2-H4K8ac_peak_15783 | 5.20998  | CTC-273B12.5_ENSG00000268530                        |
| 19 | 48996889 | 48997188 | KD2-H4K8ac_peak_15784 | 6.20982  |                                                     |
| 19 | 49016762 | 49017749 | KD2-H4K8ac_peak_15785 | 22.28018 | LMTK3_ENSG00000142235;CTC-273B12.10_ENSG00000269814 |
| 19 | 49092480 | 49092762 | KD2-H4K8ac_peak_15786 | 7.27716  |                                                     |
| 19 | 49111784 | 49112402 | KD2-H4K8ac_peak_15787 | 18.5703  |                                                     |
| 19 | 49112665 | 49112982 | KD2-H4K8ac_peak_15788 | 7.40111  |                                                     |
| 19 | 49121893 | 49122297 | KD2-H4K8ac_peak_15789 | 5.75757  | RPL18_ENSG00000063177;SPHK2_ENSG00000063176         |
| 19 | 49122784 | 49123116 | KD2-H4K8ac_peak_15790 | 9.03107  | RPL18_ENSG00000063177;SPHK2_ENSG00000063176         |
| 19 | 49126967 | 49127250 | KD2-H4K8ac_peak_15791 | 6.0073   | AC022154.7_ENSG00000268093                          |
| 19 | 49138114 | 49138450 | KD2-H4K8ac_peak_15792 | 9.34989  |                                                     |
| 19 | 49141700 | 49142396 | KD2-H4K8ac_peak_15793 | 9.44423  | SEC1P_ENSG00000232871                               |
| 19 | 49148607 | 49149294 | KD2-H4K8ac_peak_15794 | 10.46874 | CA11_ENSG00000063180                                |
| 19 | 49149539 | 49149936 | KD2-H4K8ac_peak_15795 | 25.36636 | CA11_ENSG00000063180                                |
| 19 | 49157369 | 49158385 | KD2-H4K8ac_peak_15796 | 7.07117  |                                                     |
| 19 | 49164624 | 49164872 | KD2-H4K8ac_peak_15797 | 7.40314  |                                                     |
| 19 | 49178075 | 49178762 | KD2-H4K8ac_peak_15798 | 8.4716   |                                                     |
| 19 | 49218725 | 49219141 | KD2-H4K8ac_peak_15799 | 5.02584  |                                                     |
| 19 | 49220187 | 49220480 | KD2-H4K8ac_peak_15800 | 4.86324  |                                                     |
| 19 | 49222902 | 49223858 | KD2-H4K8ac_peak_15801 | 8.23796  | MAMSTR_ENSG00000176909                              |
| 19 | 49224169 | 49224379 | KD2-H4K8ac_peak_15802 | 10.87093 |                                                     |
| 19 | 49227867 | 49228094 | KD2-H4K8ac_peak_15803 | 5.54647  |                                                     |
| 19 | 49242326 | 49242883 | KD2-H4K8ac_peak_15804 | 13.80019 |                                                     |
| 19 | 49250030 | 49250801 | KD2-H4K8ac_peak_15805 | 13.56049 | IZUMO1_ENSG00000182264                              |
| 19 | 49255733 | 49256766 | KD2-H4K8ac_peak_15806 | 11.05467 |                                                     |
| 19 | 49285257 | 49285494 | KD2-H4K8ac_peak_15807 | 6.94255  |                                                     |
| 19 | 49297856 | 49298744 | KD2-H4K8ac_peak_15808 | 13.09607 |                                                     |
| 19 | 49299120 | 49299328 | KD2-H4K8ac_peak_15809 | 9.1707   |                                                     |
| 19 | 49313637 | 49313969 | KD2-H4K8ac_peak_15810 | 6.66692  | BCAT2_ENSG00000105552                               |
| 19 | 49314178 | 49314459 | KD2-H4K8ac_peak_15811 | 4.211    | BCAT2_ENSG00000105552                               |
| 19 | 49338711 | 49339058 | KD2-H4K8ac_peak_15812 | 7.49599  | HSD17B14_ENSG00000087076                            |
| 19 | 49339599 | 49339796 | KD2-H4K8ac_peak_15813 | 6.0073   | HSD17B14_ENSG00000087076                            |
| 19 | 49340601 | 49340969 | KD2-H4K8ac_peak_15814 | 15.99047 | HSD17B14_ENSG00000087076                            |
| 19 | 49371269 | 49371519 | KD2-H4K8ac_peak_15815 | 6.86812  | PLEKHA4_ENSG00000105559                             |
| 19 | 49371867 | 49372185 | KD2-H4K8ac_peak_15816 | 5.75757  | PLEKHA4_ENSG00000105559                             |
| 19 | 49374958 | 49375434 | KD2-H4K8ac_peak_15817 | 13.53715 | PPP1R15A_ENSG00000087074                            |
| 19 | 49375698 | 49376075 | KD2-H4K8ac_peak_15818 | 13.70753 | PPP1R15A_ENSG00000087074                            |
| 19 | 49399064 | 49399537 | KD2-H4K8ac_peak_15819 | 15.57998 |                                                     |
| 19 | 49458285 | 49458667 | KD2-H4K8ac_peak_15820 | 8.16906  | BAX_ENSG00000087088                                 |
| 19 | 49466694 | 49467249 | KD2-H4K8ac_peak_15821 | 6.72021  | CTD-2639E6.9_ENSG00000267898                        |
| 19 | 49521190 | 49521615 | KD2-H4K8ac_peak_15822 | 10.21366 | LHB_ENSG00000104826                                 |

|    |          |          |                       |          |                                                       |
|----|----------|----------|-----------------------|----------|-------------------------------------------------------|
| 19 | 49522958 | 49523243 | KD2-H4K8ac_peak_15823 | 4.211    | CTB-60B18.10_ENSG00000268655                          |
| 19 | 49560310 | 49560505 | KD2-H4K8ac_peak_15824 | 4.42765  |                                                       |
| 19 | 49560731 | 49561124 | KD2-H4K8ac_peak_15825 | 5.88845  | CGB7_ENSG00000196337                                  |
| 19 | 49587902 | 49588292 | KD2-H4K8ac_peak_15826 | 8.53581  | SNRNP70_ENSG00000104852                               |
| 19 | 49588720 | 49589303 | KD2-H4K8ac_peak_15827 | 12.84642 | SNRNP70_ENSG00000104852                               |
| 19 | 49617290 | 49617828 | KD2-H4K8ac_peak_15828 | 10.86378 | LIN7B_ENSG00000104863                                 |
| 19 | 49622970 | 49623383 | KD2-H4K8ac_peak_15829 | 10.90543 | C19orf73_ENSG00000221916;PPFIA3_ENSG00000177380       |
| 19 | 49630797 | 49631263 | KD2-H4K8ac_peak_15830 | 8.86099  |                                                       |
| 19 | 49645304 | 49645525 | KD2-H4K8ac_peak_15831 | 6.15357  |                                                       |
| 19 | 49653989 | 49654239 | KD2-H4K8ac_peak_15832 | 10.96455 |                                                       |
| 19 | 49660621 | 49660918 | KD2-H4K8ac_peak_15833 | 9.06703  | TRPM4_ENSG00000130529                                 |
| 19 | 49864461 | 49864768 | KD2-H4K8ac_peak_15834 | 17.83205 | TEAD2_ENSG0000074219;DKKL1_ENSG00000104901            |
| 19 | 49865116 | 49865628 | KD2-H4K8ac_peak_15835 | 15.66774 | TEAD2_ENSG0000074219;DKKL1_ENSG00000104901            |
| 19 | 49865844 | 49866080 | KD2-H4K8ac_peak_15836 | 9.11031  | TEAD2_ENSG0000074219;DKKL1_ENSG00000104901            |
| 19 | 49954543 | 49954942 | KD2-H4K8ac_peak_15837 | 9.1707   |                                                       |
| 19 | 49956910 | 49957251 | KD2-H4K8ac_peak_15838 | 8.10216  | PIH1D1_ENSG00000104872;ALDH16A1_ENSG00000161618       |
| 19 | 49977112 | 49977630 | KD2-H4K8ac_peak_15839 | 9.90914  | FLT3LG_ENSG00000090554;CTD-3148I10.15_ENSG00000273189 |
| 19 | 49979405 | 49979636 | KD2-H4K8ac_peak_15840 | 7.19807  |                                                       |
| 19 | 49982349 | 49983079 | KD2-H4K8ac_peak_15841 | 9.11031  |                                                       |
| 19 | 49989861 | 49990546 | KD2-H4K8ac_peak_15842 | 15.039   | RPL13A_ENSG00000142541                                |
| 19 | 49990881 | 49991334 | KD2-H4K8ac_peak_15843 | 9.34989  | RPL13A_ENSG00000142541                                |
| 19 | 49998572 | 49999212 | KD2-H4K8ac_peak_15844 | 13.80019 | RPS11_ENSG00000142534                                 |
| 19 | 49999723 | 49999923 | KD2-H4K8ac_peak_15845 | 12.57143 | RPS11_ENSG00000142534                                 |
| 19 | 50015430 | 50016017 | KD2-H4K8ac_peak_15846 | 11.05407 |                                                       |
| 19 | 50016446 | 50016866 | KD2-H4K8ac_peak_15847 | 5.30799  |                                                       |
| 19 | 50030671 | 50030914 | KD2-H4K8ac_peak_15848 | 7.76329  | RCN3_ENSG00000142552                                  |
| 19 | 50084006 | 50084846 | KD2-H4K8ac_peak_15849 | 11.24422 | PRRG2_ENSG00000126460                                 |
| 19 | 50088087 | 50088419 | KD2-H4K8ac_peak_15850 | 8.37231  |                                                       |
| 19 | 50094464 | 50094695 | KD2-H4K8ac_peak_15851 | 12.85889 | NOSIP_ENSG00000142546;PRR12_ENSG00000126464           |
| 19 | 50095052 | 50095250 | KD2-H4K8ac_peak_15852 | 5.80249  | PRR12_ENSG00000126464                                 |
| 19 | 50143042 | 50143317 | KD2-H4K8ac_peak_15853 | 8.66888  | RRAS_ENSG00000126458                                  |
| 19 | 50143919 | 50145044 | KD2-H4K8ac_peak_15854 | 22.12789 | RRAS_ENSG00000126458;SCAF1_ENSG00000126461            |
| 19 | 50145502 | 50146143 | KD2-H4K8ac_peak_15855 | 12.82393 | SCAF1_ENSG00000126461                                 |
| 19 | 50167949 | 50168149 | KD2-H4K8ac_peak_15856 | 5.30799  | IRF3_ENSG00000126456;BCL2L12_ENSG00000126453          |
| 19 | 50169387 | 50169665 | KD2-H4K8ac_peak_15857 | 4.19765  | IRF3_ENSG00000126456;BCL2L12_ENSG00000126453          |
| 19 | 50178623 | 50178950 | KD2-H4K8ac_peak_15858 | 5.405    | PRMT1_ENSG00000126457                                 |
| 19 | 50180588 | 50181260 | KD2-H4K8ac_peak_15859 | 14.275   |                                                       |
| 19 | 50194471 | 50195119 | KD2-H4K8ac_peak_15860 | 6.40297  | CTB-33G10.6_ENSG00000268677;CPT1C_ENSG00000169169     |
| 19 | 50195365 | 50195631 | KD2-H4K8ac_peak_15861 | 13.56049 |                                                       |
| 19 | 50216100 | 50216374 | KD2-H4K8ac_peak_15862 | 7.47462  |                                                       |
| 19 | 50216638 | 50216920 | KD2-H4K8ac_peak_15863 | 5.69023  |                                                       |
| 19 | 50268970 | 50269260 | KD2-H4K8ac_peak_15864 | 9.9363   | AP2A1_ENSG00000196961                                 |
| 19 | 50305955 | 50306380 | KD2-H4K8ac_peak_15865 | 14.43704 |                                                       |
| 19 | 50315706 | 50316780 | KD2-H4K8ac_peak_15866 | 18.94636 |                                                       |
| 19 | 50317693 | 50317892 | KD2-H4K8ac_peak_15867 | 7.70289  |                                                       |
| 19 | 50321355 | 50321869 | KD2-H4K8ac_peak_15868 | 8.30974  | FUZ_ENSG0000010361;MED25_ENSG00000104973              |

|    |          |          |                       |          |                                                                  |
|----|----------|----------|-----------------------|----------|------------------------------------------------------------------|
| 19 | 50353386 | 50353601 | KD2-H4K8ac_peak_15869 | 5.04761  | PTOV1_ENSG00000104960                                            |
| 19 | 50370326 | 50370782 | KD2-H4K8ac_peak_15870 | 7.49599  | PNKP_ENSG00000039650                                             |
| 19 | 50371466 | 50371794 | KD2-H4K8ac_peak_15871 | 6.98302  | PNKP_ENSG00000039650                                             |
| 19 | 50372389 | 50372600 | KD2-H4K8ac_peak_15872 | 6.99815  |                                                                  |
| 19 | 50373181 | 50373553 | KD2-H4K8ac_peak_15873 | 19.33018 |                                                                  |
| 19 | 50379465 | 50379902 | KD2-H4K8ac_peak_15874 | 22.07161 | TBC1D17_ENSG00000104946                                          |
| 19 | 50380103 | 50380609 | KD2-H4K8ac_peak_15875 | 24.29798 | TBC1D17_ENSG00000104946                                          |
| 19 | 50394350 | 50394721 | KD2-H4K8ac_peak_15876 | 6.40683  |                                                                  |
| 19 | 50432131 | 50433251 | KD2-H4K8ac_peak_15877 | 23.8572  | IL4I1_ENSG00000104951;NUP62_ENSG00000213024;ATF5_ENSG00000169136 |
| 19 | 50528204 | 50528588 | KD2-H4K8ac_peak_15878 | 14.8083  | VRK3_ENSG00000105053;ZNF473_ENSG00000142528                      |
| 19 | 50815844 | 50816056 | KD2-H4K8ac_peak_15879 | 7.40633  |                                                                  |
| 19 | 50818574 | 50818775 | KD2-H4K8ac_peak_15880 | 8.30974  |                                                                  |
| 19 | 50828695 | 50828897 | KD2-H4K8ac_peak_15881 | 10.08874 |                                                                  |
| 19 | 50836409 | 50837068 | KD2-H4K8ac_peak_15882 | 5.54647  | KCNC3_ENSG00000131398                                            |
| 19 | 50837265 | 50837545 | KD2-H4K8ac_peak_15883 | 10.87093 | KCNC3_ENSG00000131398                                            |
| 19 | 50861025 | 50861595 | KD2-H4K8ac_peak_15884 | 7.13615  |                                                                  |
| 19 | 50872047 | 50872519 | KD2-H4K8ac_peak_15885 | 7.47462  | CTB-191K22.6_ENSG00000269392                                     |
| 19 | 50872865 | 50873316 | KD2-H4K8ac_peak_15886 | 7.47462  | CTB-191K22.6_ENSG00000269392                                     |
| 19 | 50878873 | 50879246 | KD2-H4K8ac_peak_15887 | 5.30799  |                                                                  |
| 19 | 50879772 | 50879998 | KD2-H4K8ac_peak_15888 | 15.25814 |                                                                  |
| 19 | 50886639 | 50886965 | KD2-H4K8ac_peak_15889 | 4.42765  | POLD1_ENSG00000062822                                            |
| 19 | 50935529 | 50935835 | KD2-H4K8ac_peak_15890 | 9.43685  | MYBPC2_ENSG00000086967                                           |
| 19 | 50964239 | 50964523 | KD2-H4K8ac_peak_15891 | 7.95563  |                                                                  |
| 19 | 50964924 | 50965154 | KD2-H4K8ac_peak_15892 | 7.45501  |                                                                  |
| 19 | 50979022 | 50979629 | KD2-H4K8ac_peak_15893 | 9.63487  | FAM71E1_ENSG00000142530;EMC10_ENSG00000161671                    |
| 19 | 50979829 | 50980085 | KD2-H4K8ac_peak_15894 | 10.65724 | FAM71E1_ENSG00000142530;EMC10_ENSG00000161671                    |
| 19 | 51003527 | 51003883 | KD2-H4K8ac_peak_15895 | 5.57044  |                                                                  |
| 19 | 51013637 | 51013860 | KD2-H4K8ac_peak_15896 | 5.34636  | JOSD2_ENSG00000161677                                            |
| 19 | 51014106 | 51014359 | KD2-H4K8ac_peak_15897 | 7.49599  | JOSD2_ENSG00000161677                                            |
| 19 | 51015785 | 51016189 | KD2-H4K8ac_peak_15898 | 4.62142  |                                                                  |
| 19 | 51016706 | 51017180 | KD2-H4K8ac_peak_15899 | 10.50156 | ASPDH_ENSG00000204653                                            |
| 19 | 51017376 | 51018461 | KD2-H4K8ac_peak_15900 | 12.84642 | ASPDH_ENSG00000204653                                            |
| 19 | 51071300 | 51071528 | KD2-H4K8ac_peak_15901 | 9.36516  | LRRC4B_ENSG00000131409                                           |
| 19 | 51109843 | 51110056 | KD2-H4K8ac_peak_15902 | 6.16888  |                                                                  |
| 19 | 51110797 | 51111051 | KD2-H4K8ac_peak_15903 | 7.12754  |                                                                  |
| 19 | 51142241 | 51142446 | KD2-H4K8ac_peak_15904 | 8.5092   |                                                                  |
| 19 | 51143173 | 51143567 | KD2-H4K8ac_peak_15905 | 13.9234  |                                                                  |
| 19 | 51153144 | 51153498 | KD2-H4K8ac_peak_15906 | 8.00457  | C19orf81_ENSG00000235034                                         |
| 19 | 51198872 | 51199254 | KD2-H4K8ac_peak_15907 | 11.59946 |                                                                  |
| 19 | 51222860 | 51223063 | KD2-H4K8ac_peak_15908 | 9.59147  | SHANK1_ENSG00000161681                                           |
| 19 | 51227596 | 51228056 | KD2-H4K8ac_peak_15909 | 8.66888  |                                                                  |
| 19 | 51228462 | 51228743 | KD2-H4K8ac_peak_15910 | 10.19949 |                                                                  |
| 19 | 51307583 | 51308157 | KD2-H4K8ac_peak_15911 | 9.36516  | C19orf48_ENSG00000167747                                         |
| 19 | 51308354 | 51308586 | KD2-H4K8ac_peak_15912 | 11.05407 | C19orf48_ENSG00000167747                                         |
| 19 | 51308816 | 51309021 | KD2-H4K8ac_peak_15913 | 7.12754  | C19orf48_ENSG00000167747                                         |
| 19 | 51612195 | 51612566 | KD2-H4K8ac_peak_15914 | 10.87093 | CTU1_ENSG00000142544                                             |

|    |          |          |                       |          |                                                                                 |
|----|----------|----------|-----------------------|----------|---------------------------------------------------------------------------------|
| 19 | 51815102 | 51815471 | KD2-H4K8ac_peak_15915 | 11.05407 |                                                                                 |
| 19 | 51843460 | 51843752 | KD2-H4K8ac_peak_15916 | 6.40297  | CTD-2616J11.16_ENSG00000267905                                                  |
| 19 | 51871212 | 51872278 | KD2-H4K8ac_peak_15917 | 5.85291  | CTD-2616J11.11_ENSG00000269403;CLDND2_ENSG00000160318                           |
| 19 | 51896977 | 51897309 | KD2-H4K8ac_peak_15918 | 4.37809  | CTD-2616J11.14_ENSG00000268889                                                  |
| 19 | 51897841 | 51898068 | KD2-H4K8ac_peak_15919 | 7.27716  | CTD-2616J11.14_ENSG00000268889                                                  |
| 19 | 52097150 | 52097426 | KD2-H4K8ac_peak_15920 | 4.24345  | AC018755.1_ENSG00000167765;AC018755.16_ENSG00000269388                          |
| 19 | 52097871 | 52098457 | KD2-H4K8ac_peak_15921 | 11.22681 | AC018755.1_ENSG00000167765;AC018755.16_ENSG00000269388                          |
| 19 | 52191548 | 52191848 | KD2-H4K8ac_peak_15922 | 7.70289  |                                                                                 |
| 19 | 52192664 | 52193159 | KD2-H4K8ac_peak_15923 | 9.1707   |                                                                                 |
| 19 | 52193457 | 52194026 | KD2-H4K8ac_peak_15924 | 6.40297  |                                                                                 |
| 19 | 52207585 | 52207838 | KD2-H4K8ac_peak_15925 | 12.00597 |                                                                                 |
| 19 | 52407817 | 52408198 | KD2-H4K8ac_peak_15926 | 5.71749  | ZNF649_ENSG00000198093                                                          |
| 19 | 52429752 | 52430261 | KD2-H4K8ac_peak_15927 | 10.0692  | ZNF613_ENSG00000176024                                                          |
| 19 | 52511557 | 52512218 | KD2-H4K8ac_peak_15928 | 8.74596  | ZNF615_ENSG00000197619                                                          |
| 19 | 52531177 | 52532141 | KD2-H4K8ac_peak_15929 | 14.15075 |                                                                                 |
| 19 | 52642754 | 52643166 | KD2-H4K8ac_peak_15930 | 10.96455 | ZNF616_ENSG00000204611                                                          |
| 19 | 52674292 | 52674832 | KD2-H4K8ac_peak_15931 | 5.88845  | CTC-471J1.8_ENSG00000267827;ZNF836_ENSG00000196267;CTD-2525I3.2_ENSG00000267927 |
| 19 | 52692521 | 52692867 | KD2-H4K8ac_peak_15932 | 6.07178  | PPP2R1A_ENSG00000105568                                                         |
| 19 | 52693359 | 52693936 | KD2-H4K8ac_peak_15933 | 10.05606 | PPP2R1A_ENSG00000105568                                                         |
| 19 | 52694218 | 52694412 | KD2-H4K8ac_peak_15934 | 6.16888  | PPP2R1A_ENSG00000105568                                                         |
| 19 | 52772209 | 52772457 | KD2-H4K8ac_peak_15935 | 5.10276  | ZNF766_ENSG00000196214                                                          |
| 19 | 52772968 | 52773328 | KD2-H4K8ac_peak_15936 | 16.8435  | ZNF766_ENSG00000196214                                                          |
| 19 | 52800503 | 52800945 | KD2-H4K8ac_peak_15937 | 16.32216 | CTD-2525I3.5_ENSG00000269102;ZNF480_ENSG00000198464                             |
| 19 | 52839698 | 52840428 | KD2-H4K8ac_peak_15938 | 9.51625  | ZNF610_ENSG00000167554                                                          |
| 19 | 53029973 | 53030658 | KD2-H4K8ac_peak_15939 | 5.73839  | ZNF808_ENSG00000198482                                                          |
| 19 | 53031007 | 53031639 | KD2-H4K8ac_peak_15940 | 9.1707   | ZNF808_ENSG00000198482                                                          |
| 19 | 53072962 | 53073273 | KD2-H4K8ac_peak_15941 | 6.66692  |                                                                                 |
| 19 | 53104792 | 53105096 | KD2-H4K8ac_peak_15942 | 6.0073   |                                                                                 |
| 19 | 53140900 | 53141565 | KD2-H4K8ac_peak_15943 | 14.74047 |                                                                                 |
| 19 | 53193080 | 53193315 | KD2-H4K8ac_peak_15944 | 6.85193  | ZNF83_ENSG00000167766                                                           |
| 19 | 53360994 | 53361556 | KD2-H4K8ac_peak_15945 | 5.88845  | ZNF28_ENSG00000198538;ZNF468_ENSG00000204604                                    |
| 19 | 53465833 | 53466034 | KD2-H4K8ac_peak_15946 | 6.25869  | ZNF816_ENSG00000180257;ZNF321P_ENSG00000221874                                  |
| 19 | 53466572 | 53466790 | KD2-H4K8ac_peak_15947 | 4.8888   | ZNF816_ENSG00000180257;ZNF321P_ENSG00000221874                                  |
| 19 | 53606084 | 53606389 | KD2-H4K8ac_peak_15948 | 10.8368  | ZNF160_ENSG00000170949                                                          |
| 19 | 53636253 | 53636447 | KD2-H4K8ac_peak_15949 | 5.14125  | ZNF415_ENSG00000170954                                                          |
| 19 | 53696054 | 53696588 | KD2-H4K8ac_peak_15950 | 7.12754  | ZNF665_ENSG00000197497                                                          |
| 19 | 53700427 | 53700803 | KD2-H4K8ac_peak_15951 | 3.97079  | CTD-2245F17.3_ENSG00000269051                                                   |
| 19 | 53868448 | 53868725 | KD2-H4K8ac_peak_15952 | 7.146    | ZNF525_ENSG00000203326                                                          |
| 19 | 53897815 | 53898030 | KD2-H4K8ac_peak_15953 | 8.58725  |                                                                                 |
| 19 | 53898640 | 53898992 | KD2-H4K8ac_peak_15954 | 8.75125  |                                                                                 |
| 19 | 54023461 | 54023875 | KD2-H4K8ac_peak_15955 | 8.59579  | ZNF331_ENSG00000130844                                                          |
| 19 | 54041289 | 54041605 | KD2-H4K8ac_peak_15956 | 4.0528   |                                                                                 |
| 19 | 54369159 | 54369546 | KD2-H4K8ac_peak_15957 | 16.54162 | MYADM_ENSG00000179820                                                           |
| 19 | 54369781 | 54370533 | KD2-H4K8ac_peak_15958 | 6.25869  | MYADM_ENSG00000179820                                                           |
| 19 | 54372215 | 54372479 | KD2-H4K8ac_peak_15959 | 5.13615  | AC008753.6_ENSG00000228323                                                      |
| 19 | 54382955 | 54383240 | KD2-H4K8ac_peak_15960 | 7.83489  | PRKCG_ENSG00000126583                                                           |

|    |          |          |                       |          |                                                     |
|----|----------|----------|-----------------------|----------|-----------------------------------------------------|
| 19 | 54385562 | 54385770 | KD2-H4K8ac_peak_15961 | 5.9696   |                                                     |
| 19 | 54392829 | 54393264 | KD2-H4K8ac_peak_15962 | 7.47462  |                                                     |
| 19 | 54409946 | 54410140 | KD2-H4K8ac_peak_15963 | 10.1591  |                                                     |
| 19 | 54411533 | 54411742 | KD2-H4K8ac_peak_15964 | 4.211    | CACNG7_ENSG00000105605                              |
| 19 | 54411973 | 54412289 | KD2-H4K8ac_peak_15965 | 4.77079  | CACNG7_ENSG00000105605                              |
| 19 | 54412719 | 54413196 | KD2-H4K8ac_peak_15966 | 10.2048  | CACNG7_ENSG00000105605                              |
| 19 | 54449026 | 54449224 | KD2-H4K8ac_peak_15967 | 7.27716  |                                                     |
| 19 | 54461075 | 54461460 | KD2-H4K8ac_peak_15968 | 6.00226  |                                                     |
| 19 | 54461868 | 54462205 | KD2-H4K8ac_peak_15969 | 11.20997 |                                                     |
| 19 | 54464990 | 54465610 | KD2-H4K8ac_peak_15970 | 7.27716  | CACNG8_ENSG00000142408                              |
| 19 | 54605371 | 54605929 | KD2-H4K8ac_peak_15971 | 17.70889 | OSCAR_ENSG00000170909;NDUFA3_ENSG00000170906        |
| 19 | 54606204 | 54606632 | KD2-H4K8ac_peak_15972 | 10.19949 | OSCAR_ENSG00000170909;NDUFA3_ENSG00000170906        |
| 19 | 54618012 | 54618433 | KD2-H4K8ac_peak_15973 | 6.0073   | TFPT_ENSG00000105619;PRPF31_ENSG00000105618         |
| 19 | 54618810 | 54619003 | KD2-H4K8ac_peak_15974 | 5.82799  | TFPT_ENSG00000105619;PRPF31_ENSG00000105618         |
| 19 | 54641496 | 54642150 | KD2-H4K8ac_peak_15975 | 17.43705 | CNOT3_ENSG00000088038                               |
| 19 | 54694140 | 54694444 | KD2-H4K8ac_peak_15976 | 11.50346 | MBOAT7_ENSG00000125505;TSEN34_ENSG00000170892       |
| 19 | 54694766 | 54695339 | KD2-H4K8ac_peak_15977 | 9.402    | TSEN34_ENSG00000170892                              |
| 19 | 54703748 | 54703962 | KD2-H4K8ac_peak_15978 | 7.13615  | AC012314.20_ENSG00000223660;RPS9_ENSG00000170889    |
| 19 | 54704190 | 54704535 | KD2-H4K8ac_peak_15979 | 9.08816  | AC012314.20_ENSG00000223660;RPS9_ENSG00000170889    |
| 19 | 54959455 | 54959979 | KD2-H4K8ac_peak_15980 | 6.40297  | LENG8-AS1_ENSG00000226696;LENG8_ENSG00000167615     |
| 19 | 54960456 | 54960837 | KD2-H4K8ac_peak_15981 | 5.30799  | LENG8-AS1_ENSG00000226696;LENG8_ENSG00000167615     |
| 19 | 54976118 | 54976591 | KD2-H4K8ac_peak_15982 | 11.9948  |                                                     |
| 19 | 55591204 | 55592069 | KD2-H4K8ac_peak_15983 | 12.30509 |                                                     |
| 19 | 55593666 | 55593887 | KD2-H4K8ac_peak_15984 | 5.34636  |                                                     |
| 19 | 55629252 | 55629632 | KD2-H4K8ac_peak_15985 | 13.73635 | PPP1R12C_ENSG00000125503                            |
| 19 | 55630043 | 55630262 | KD2-H4K8ac_peak_15986 | 3.97079  |                                                     |
| 19 | 55658013 | 55658592 | KD2-H4K8ac_peak_15987 | 14.98671 |                                                     |
| 19 | 55691236 | 55691432 | KD2-H4K8ac_peak_15988 | 4.42498  | SYT5_ENSG00000129990                                |
| 19 | 55718355 | 55718566 | KD2-H4K8ac_peak_15989 | 5.13615  |                                                     |
| 19 | 55728038 | 55728609 | KD2-H4K8ac_peak_15990 | 9.36516  | CTD-2587H24.10_ENSG00000267649                      |
| 19 | 55770017 | 55770320 | KD2-H4K8ac_peak_15991 | 8.85813  | PPP6R1_ENSG00000105063                              |
| 19 | 55771199 | 55771590 | KD2-H4K8ac_peak_15992 | 4.67342  | PPP6R1_ENSG00000105063                              |
| 19 | 55790652 | 55790881 | KD2-H4K8ac_peak_15993 | 7.8711   | HSPBP1_ENSG00000133265                              |
| 19 | 55791906 | 55792109 | KD2-H4K8ac_peak_15994 | 11.05467 | HSPBP1_ENSG00000133265                              |
| 19 | 55794736 | 55795091 | KD2-H4K8ac_peak_15995 | 5.88845  |                                                     |
| 19 | 55795501 | 55795996 | KD2-H4K8ac_peak_15996 | 16.8435  |                                                     |
| 19 | 55812760 | 55813902 | KD2-H4K8ac_peak_15997 | 10.1591  |                                                     |
| 19 | 55831390 | 55831696 | KD2-H4K8ac_peak_15998 | 5.9696   |                                                     |
| 19 | 55850161 | 55850527 | KD2-H4K8ac_peak_15999 | 7.74292  | SUV420H2_ENSG00000133247;AC020922.1_ENSG00000267531 |
| 19 | 55851573 | 55852043 | KD2-H4K8ac_peak_16000 | 5.76151  | SUV420H2_ENSG00000133247;AC020922.1_ENSG00000267531 |
| 19 | 55885466 | 55885689 | KD2-H4K8ac_peak_16001 | 7.22457  |                                                     |
| 19 | 55894751 | 55894990 | KD2-H4K8ac_peak_16002 | 10.7186  | TMEM238_ENSG00000233493                             |
| 19 | 55895277 | 55895737 | KD2-H4K8ac_peak_16003 | 11.00004 | TMEM238_ENSG00000233493;RPL28_ENSG00000108107       |
| 19 | 55896214 | 55896603 | KD2-H4K8ac_peak_16004 | 6.20982  | TMEM238_ENSG00000233493;RPL28_ENSG00000108107       |
| 19 | 55897660 | 55897860 | KD2-H4K8ac_peak_16005 | 5.32397  | RPL28_ENSG00000108107                               |
| 19 | 55918725 | 55919434 | KD2-H4K8ac_peak_16006 | 12.93253 | UBE2S_ENSG00000108106                               |



|    |          |          |                       |          |                                                                            |
|----|----------|----------|-----------------------|----------|----------------------------------------------------------------------------|
| 19 | 55919849 | 55920429 | KD2-H4K8ac_peak_16007 | 10.29842 | UBE2S_ENSG00000108106                                                      |
| 19 | 55951660 | 55952240 | KD2-H4K8ac_peak_16008 | 18.54875 |                                                                            |
| 19 | 55963870 | 55964217 | KD2-H4K8ac_peak_16009 | 6.25869  |                                                                            |
| 19 | 55972626 | 55972915 | KD2-H4K8ac_peak_16010 | 11.76021 | ISOC2_ENSG00000063241                                                      |
| 19 | 55986952 | 55988164 | KD2-H4K8ac_peak_16011 | 22.25695 | CTD-253719.16_ENSG00000269859;ZNF628_ENSG00000197483                       |
| 19 | 55995963 | 55996720 | KD2-H4K8ac_peak_16012 | 12.78054 | NAT14_ENSG00000090971                                                      |
| 19 | 55997894 | 55998399 | KD2-H4K8ac_peak_16013 | 7.30812  |                                                                            |
| 19 | 56028588 | 56028888 | KD2-H4K8ac_peak_16014 | 11.89502 |                                                                            |
| 19 | 56091611 | 56092177 | KD2-H4K8ac_peak_16015 | 11.92978 | ZNF579_ENSG00000218891                                                     |
| 19 | 56092381 | 56092991 | KD2-H4K8ac_peak_16016 | 10.59312 | ZNF579_ENSG00000218891                                                     |
| 19 | 56096920 | 56097164 | KD2-H4K8ac_peak_16017 | 10.19949 |                                                                            |
| 19 | 56097430 | 56097762 | KD2-H4K8ac_peak_16018 | 13.70753 |                                                                            |
| 19 | 56099221 | 56099462 | KD2-H4K8ac_peak_16019 | 5.57044  |                                                                            |
| 19 | 56110623 | 56110886 | KD2-H4K8ac_peak_16020 | 21.11201 | ZNF524_ENSG00000171443                                                     |
| 19 | 56111117 | 56111589 | KD2-H4K8ac_peak_16021 | 11.24702 | ZNF524_ENSG00000171443                                                     |
| 19 | 56111995 | 56112377 | KD2-H4K8ac_peak_16022 | 8.33649  | FIZ1_ENSG00000179943;ZNF524_ENSG00000171443                                |
| 19 | 56116034 | 56116393 | KD2-H4K8ac_peak_16023 | 10.96455 | ZNF865_ENSG00000261221                                                     |
| 19 | 56117066 | 56117417 | KD2-H4K8ac_peak_16024 | 9.63487  | ZNF865_ENSG00000261221                                                     |
| 19 | 56145704 | 56146002 | KD2-H4K8ac_peak_16025 | 6.40297  | ZNF580_ENSG00000213015;ZNF581_ENSG00000171425                              |
| 19 | 56146428 | 56146756 | KD2-H4K8ac_peak_16026 | 12.51591 | ZNF580_ENSG00000213015;ZNF581_ENSG00000171425                              |
| 19 | 56151683 | 56152035 | KD2-H4K8ac_peak_16027 | 6.52179  | CCDC106_ENSG00000173581                                                    |
| 19 | 56152368 | 56152941 | KD2-H4K8ac_peak_16028 | 14.95369 | CCDC106_ENSG00000173581                                                    |
| 19 | 56155035 | 56155412 | KD2-H4K8ac_peak_16029 | 7.74292  |                                                                            |
| 19 | 56158965 | 56160042 | KD2-H4K8ac_peak_16030 | 9.36665  |                                                                            |
| 19 | 56164803 | 56165021 | KD2-H4K8ac_peak_16031 | 7.45629  | U2AF2_ENSG00000063244                                                      |
| 19 | 56165336 | 56165613 | KD2-H4K8ac_peak_16032 | 5.30799  | U2AF2_ENSG00000063244                                                      |
| 19 | 56165940 | 56166172 | KD2-H4K8ac_peak_16033 | 9.20193  | U2AF2_ENSG00000063244                                                      |
| 19 | 56166384 | 56166737 | KD2-H4K8ac_peak_16034 | 20.03864 | U2AF2_ENSG00000063244                                                      |
| 19 | 56631761 | 56632264 | KD2-H4K8ac_peak_16035 | 11.20531 | ZNF787_ENSG00000142409                                                     |
| 19 | 56825620 | 56825814 | KD2-H4K8ac_peak_16036 | 7.98152  | AC006116.17_ENSG00000267549                                                |
| 19 | 56826020 | 56826235 | KD2-H4K8ac_peak_16037 | 11.89502 | AC006116.17_ENSG00000267549                                                |
| 19 | 56826709 | 56827129 | KD2-H4K8ac_peak_16038 | 11.90231 | AC006116.17_ENSG00000267549;Y_RNA_ENSG00000200646                          |
| 19 | 56879164 | 56880124 | KD2-H4K8ac_peak_16039 | 10.53377 | ZSCAN5A_ENSG00000131848;AC006116.21_ENSG00000267606;ZNF542_ENSG00000240225 |
| 19 | 56904636 | 56904905 | KD2-H4K8ac_peak_16040 | 10.0692  | ZNF582_ENSG00000018869;ZNF582-AS1_ENSG00000267454                          |
| 19 | 56905140 | 56905375 | KD2-H4K8ac_peak_16041 | 9.1707   | ZNF582_ENSG00000018869;ZNF582-AS1_ENSG00000267454                          |
| 19 | 56915058 | 56915940 | KD2-H4K8ac_peak_16042 | 37.48141 |                                                                            |
| 19 | 56988974 | 56989391 | KD2-H4K8ac_peak_16043 | 5.75757  | ZNF667_ENSG00000198046;ZNF667-AS1_ENSG00000166770                          |
| 19 | 57019218 | 57019455 | KD2-H4K8ac_peak_16044 | 13.73635 | ZNF471_ENSG00000196263                                                     |
| 19 | 57050418 | 57050617 | KD2-H4K8ac_peak_16045 | 7.79898  | ZFP28_ENSG00000196867;AC005498.3_ENSG00000267421                           |
| 19 | 57078431 | 57079543 | KD2-H4K8ac_peak_16046 | 12.57297 | AC007228.11_ENSG00000269696;ZNF470_ENSG00000197016                         |
| 19 | 57106679 | 57107060 | KD2-H4K8ac_peak_16047 | 22.21705 | ZNF71_ENSG00000197951                                                      |
| 19 | 57182549 | 57183095 | KD2-H4K8ac_peak_16048 | 7.76329  | ZNF835_ENSG00000127903;AC007228.5_ENSG00000268352                          |
| 19 | 57702470 | 57702735 | KD2-H4K8ac_peak_16049 | 10.17341 | ZNF264_ENSG00000083844                                                     |
| 19 | 57751142 | 57751753 | KD2-H4K8ac_peak_16050 | 10.05606 | ZNF805_ENSG00000204524                                                     |
| 19 | 57752045 | 57752661 | KD2-H4K8ac_peak_16051 | 7.36799  | ZNF805_ENSG00000204524                                                     |
| 19 | 57791328 | 57791614 | KD2-H4K8ac_peak_16052 | 13.27022 | CTC-444N24.6_ENSG00000267871;ZNF460_ENSG00000197714                        |

|    |          |          |                       |          |                                                                                                    |
|----|----------|----------|-----------------------|----------|----------------------------------------------------------------------------------------------------|
| 19 | 57791932 | 57792215 | KD2-H4K8ac_peak_16053 | 7.11824  | CTC-444N24.6_ENSG00000267871;ZNF460_ENSG00000197714                                                |
| 19 | 57831953 | 57832381 | KD2-H4K8ac_peak_16054 | 10.7186  | ZNF543_ENSG00000178229                                                                             |
| 19 | 57861187 | 57861425 | KD2-H4K8ac_peak_16055 | 6.94255  |                                                                                                    |
| 19 | 57862113 | 57862423 | KD2-H4K8ac_peak_16056 | 10.8368  | CTC-444N24.13_ENSG00000268678;ZNF304_ENSG00000131845                                               |
| 19 | 57862664 | 57863102 | KD2-H4K8ac_peak_16057 | 8.30974  | CTC-444N24.13_ENSG00000268678;ZNF304_ENSG00000131845                                               |
| 19 | 57946206 | 57946404 | KD2-H4K8ac_peak_16058 | 4.42765  | ZNF749_ENSG00000186230                                                                             |
| 19 | 57946832 | 57947381 | KD2-H4K8ac_peak_16059 | 5.30799  | ZNF749_ENSG00000186230                                                                             |
| 19 | 57988559 | 57988825 | KD2-H4K8ac_peak_16060 | 10.73467 | AC004076.9_ENSG00000268163;ZNF772_ENSG00000197128;AC003005.2_ENSG00000268266                       |
| 19 | 57989134 | 57989344 | KD2-H4K8ac_peak_16061 | 7.01964  | AC004076.9_ENSG00000268163;ZNF772_ENSG00000197128;AC003005.2_ENSG00000268266                       |
| 19 | 57998764 | 57999516 | KD2-H4K8ac_peak_16062 | 16.8435  | ZNF419_ENSG00000105136;AC003005.4_ENSG00000268107                                                  |
| 19 | 58038761 | 58039162 | KD2-H4K8ac_peak_16063 | 8.85813  | ZNF549_ENSG00000121406                                                                             |
| 19 | 58070805 | 58071148 | KD2-H4K8ac_peak_16064 | 7.36799  | ZNF550_ENSG00000251369                                                                             |
| 19 | 58089834 | 58090184 | KD2-H4K8ac_peak_16065 | 6.60096  | ZNF416_ENSG00000083817;ZIK1_ENSG00000171649                                                        |
| 19 | 58094959 | 58095300 | KD2-H4K8ac_peak_16066 | 5.92591  |                                                                                                    |
| 19 | 58125702 | 58126105 | KD2-H4K8ac_peak_16067 | 7.76329  | ZNF134_ENSG00000213762                                                                             |
| 19 | 58175655 | 58176208 | KD2-H4K8ac_peak_16068 | 8.02571  | AC003682.17_ENSG00000269097                                                                        |
| 19 | 58192725 | 58193060 | KD2-H4K8ac_peak_16069 | 4.77079  | ZNF551_ENSG00000204519;AC003006.7_ENSG00000269026                                                  |
| 19 | 58193444 | 58193851 | KD2-H4K8ac_peak_16070 | 6.45083  | ZNF551_ENSG00000204519;AC003006.7_ENSG00000269026                                                  |
| 19 | 58258263 | 58258729 | KD2-H4K8ac_peak_16071 | 7.47462  | ZNF776_ENSG00000152443                                                                             |
| 19 | 58315030 | 58315381 | KD2-H4K8ac_peak_16072 | 21.10246 |                                                                                                    |
| 19 | 58325875 | 58326163 | KD2-H4K8ac_peak_16073 | 6.2781   | ZNF552_ENSG00000178935                                                                             |
| 19 | 58331148 | 58331436 | KD2-H4K8ac_peak_16074 | 12.57297 | CTD-2583A14.10_ENSG00000268750;ZNF587B_ENSG00000269343                                             |
| 19 | 58361226 | 58361859 | KD2-H4K8ac_peak_16075 | 10.05606 | ZNF587_ENSG00000198466                                                                             |
| 19 | 58427590 | 58427898 | KD2-H4K8ac_peak_16076 | 22.12789 | CTD-2583A14.9_ENSG00000269476;ZNF417_ENSG00000173480                                               |
| 19 | 58458681 | 58458909 | KD2-H4K8ac_peak_16077 | 7.51054  | ZNF256_ENSG00000152454                                                                             |
| 19 | 58513550 | 58514799 | KD2-H4K8ac_peak_16078 | 22.04674 | ZNF606_ENSG00000166704;CTD-2368P22.1_ENSG00000176593                                               |
| 19 | 58545550 | 58545758 | KD2-H4K8ac_peak_16079 | 5.51783  | ZSCAN1_ENSG00000152467                                                                             |
| 19 | 58609221 | 58609578 | KD2-H4K8ac_peak_16080 | 26.59781 |                                                                                                    |
| 19 | 58661779 | 58662068 | KD2-H4K8ac_peak_16081 | 4.37809  |                                                                                                    |
| 19 | 58666178 | 58666425 | KD2-H4K8ac_peak_16082 | 12.00597 | ZNF329_ENSG00000181894                                                                             |
| 19 | 58666662 | 58667135 | KD2-H4K8ac_peak_16083 | 10.96455 | ZNF329_ENSG00000181894                                                                             |
| 19 | 58693970 | 58694196 | KD2-H4K8ac_peak_16084 | 9.07071  | ZNF274_ENSG00000171606                                                                             |
| 19 | 58694449 | 58695336 | KD2-H4K8ac_peak_16085 | 11.05467 | ZNF274_ENSG00000171606                                                                             |
| 19 | 58789831 | 58790032 | KD2-H4K8ac_peak_16086 | 7.07117  | CTD-3138B18.5_ENSG00000268516;ZNF8_ENSG00000083842;ZNF8_ENSG00000273439;AC010642.1_ENSG00000267216 |
| 19 | 58790400 | 58790675 | KD2-H4K8ac_peak_16087 | 6.80488  | CTD-3138B18.5_ENSG00000268516;ZNF8_ENSG00000083842;ZNF8_ENSG00000273439;AC010642.1_ENSG00000267216 |
| 19 | 58790956 | 58791180 | KD2-H4K8ac_peak_16088 | 8.55271  | CTD-3138B18.5_ENSG00000268516;ZNF8_ENSG00000083842;ZNF8_ENSG00000273439;AC010642.1_ENSG00000267216 |
| 19 | 58816773 | 58817193 | KD2-H4K8ac_peak_16089 | 7.81657  | ERVK3-1_ENSG00000142396                                                                            |
| 19 | 58838441 | 58839028 | KD2-H4K8ac_peak_16090 | 7.36799  | ZSCAN22_ENSG00000182318                                                                            |
| 19 | 58872720 | 58873704 | KD2-H4K8ac_peak_16091 | 12.79505 | CTD-2619J13.8_ENSG00000268230;ZNF497_ENSG00000174586;CTD-2619J13.3_ENSG00000269054                 |
| 19 | 58891535 | 58892400 | KD2-H4K8ac_peak_16092 | 12.92667 | ZNF837_ENSG00000152475                                                                             |
| 19 | 58897331 | 58898389 | KD2-H4K8ac_peak_16093 | 13.27022 | RPS5_ENSG00000083845;MIR4754_ENSG00000266640                                                       |
| 19 | 58912130 | 58912480 | KD2-H4K8ac_peak_16094 | 7.28827  | CTD-2619J13.13_ENSG00000268307;ZNF584_ENSG00000171574                                              |
| 19 | 58920137 | 58920686 | KD2-H4K8ac_peak_16095 | 10.19949 | CTD-2619J13.14_ENSG00000232098                                                                     |
| 19 | 58950946 | 58951490 | KD2-H4K8ac_peak_16096 | 12.30509 | ZNF132_ENSG00000131849;CTD-2619J13.19_ENSG00000269473                                              |
| 19 | 58951807 | 58952316 | KD2-H4K8ac_peak_16097 | 17.8868  | ZNF132_ENSG00000131849;CTD-2619J13.19_ENSG00000269473                                              |
| 19 | 58962998 | 58963416 | KD2-H4K8ac_peak_16098 | 6.36375  | ZNF324B_ENSG00000249471                                                                            |

|    |          |          |                       |          |                                                   |
|----|----------|----------|-----------------------|----------|---------------------------------------------------|
| 19 | 58978808 | 58979025 | KD2-H4K8ac_peak_16099 | 5.63633  | ZNF324_ENSG00000083812                            |
| 19 | 58987579 | 58988341 | KD2-H4K8ac_peak_16100 | 14.69247 | CTD-2619J13.23_ENSG00000269106                    |
| 19 | 59010996 | 59011296 | KD2-H4K8ac_peak_16101 | 7.96322  |                                                   |
| 19 | 59025032 | 59025308 | KD2-H4K8ac_peak_16102 | 7.07117  |                                                   |
| 19 | 59030368 | 59031144 | KD2-H4K8ac_peak_16103 | 13.70753 |                                                   |
| 19 | 59031511 | 59031852 | KD2-H4K8ac_peak_16104 | 7.36799  |                                                   |
| 19 | 59032113 | 59032312 | KD2-H4K8ac_peak_16105 | 6.68439  |                                                   |
| 19 | 59066072 | 59066383 | KD2-H4K8ac_peak_16106 | 20.64015 | CHMP2A_ENSG00000130724                            |
| 19 | 59066707 | 59067021 | KD2-H4K8ac_peak_16107 | 6.55628  | CHMP2A_ENSG00000130724                            |
| 19 | 59070578 | 59070928 | KD2-H4K8ac_peak_16108 | 11.90231 | UBE2M_ENSG00000130725;AC016629.8_ENSG00000267858  |
| 19 | 59071121 | 59071799 | KD2-H4K8ac_peak_16109 | 12.30509 | UBE2M_ENSG00000130725;AC016629.8_ENSG00000267858  |
| 19 | 59073688 | 59074726 | KD2-H4K8ac_peak_16110 | 10.78621 |                                                   |
| 19 | 59083825 | 59084067 | KD2-H4K8ac_peak_16111 | 9.1707   | MZF1_ENSG00000099326;CENPBD1P1_ENSG00000213753    |
| 19 | 59084277 | 59084740 | KD2-H4K8ac_peak_16112 | 11.24702 | MZF1_ENSG00000099326;CENPBD1P1_ENSG00000213753    |
| 19 | 59087117 | 59087416 | KD2-H4K8ac_peak_16113 | 8.58069  |                                                   |
| 2  | 263988   | 264551   | KD2-H4K8ac_peak_16114 | 18.43081 | ACP1_ENSG00000143727                              |
| 2  | 264986   | 265481   | KD2-H4K8ac_peak_16115 | 12.57297 | SH3YL1_ENSG00000035115;ACP1_ENSG00000143727       |
| 2  | 385251   | 385454   | KD2-H4K8ac_peak_16116 | 6.66692  |                                                   |
| 2  | 609701   | 609939   | KD2-H4K8ac_peak_16117 | 5.20908  |                                                   |
| 2  | 636630   | 637127   | KD2-H4K8ac_peak_16118 | 9.63487  |                                                   |
| 2  | 677151   | 677922   | KD2-H4K8ac_peak_16119 | 27.43474 | TMEM18_ENSG00000151353;AC092159.2_ENSG00000233296 |
| 2  | 690016   | 690252   | KD2-H4K8ac_peak_16120 | 5.75757  |                                                   |
| 2  | 764300   | 764518   | KD2-H4K8ac_peak_16121 | 3.75035  |                                                   |
| 2  | 844421   | 844890   | KD2-H4K8ac_peak_16122 | 14.68449 |                                                   |
| 2  | 945749   | 946064   | KD2-H4K8ac_peak_16123 | 12.99417 | AC116614.1_ENSG00000235688;SNTG2_ENSG00000172554  |
| 2  | 946571   | 946924   | KD2-H4K8ac_peak_16124 | 8.2413   | AC116614.1_ENSG00000235688;SNTG2_ENSG00000172554  |
| 2  | 1231223  | 1231469  | KD2-H4K8ac_peak_16125 | 6.72624  |                                                   |
| 2  | 1251165  | 1251410  | KD2-H4K8ac_peak_16126 | 6.40683  |                                                   |
| 2  | 1286794  | 1287531  | KD2-H4K8ac_peak_16127 | 4.86324  |                                                   |
| 2  | 1370326  | 1370706  | KD2-H4K8ac_peak_16128 | 8.4716   |                                                   |
| 2  | 1514177  | 1514369  | KD2-H4K8ac_peak_16129 | 4.52514  |                                                   |
| 2  | 1544821  | 1545252  | KD2-H4K8ac_peak_16130 | 4.06758  |                                                   |
| 2  | 1545628  | 1545991  | KD2-H4K8ac_peak_16131 | 4.37809  |                                                   |
| 2  | 1546562  | 1546767  | KD2-H4K8ac_peak_16132 | 5.81222  |                                                   |
| 2  | 1554276  | 1554860  | KD2-H4K8ac_peak_16133 | 5.54647  |                                                   |
| 2  | 1595711  | 1595948  | KD2-H4K8ac_peak_16134 | 4.04573  |                                                   |
| 2  | 1598166  | 1598846  | KD2-H4K8ac_peak_16135 | 7.38799  |                                                   |
| 2  | 1609324  | 1609560  | KD2-H4K8ac_peak_16136 | 4.13134  |                                                   |
| 2  | 1711696  | 1712479  | KD2-H4K8ac_peak_16137 | 6.84261  |                                                   |
| 2  | 1718036  | 1718481  | KD2-H4K8ac_peak_16138 | 8.1235   |                                                   |
| 2  | 1719217  | 1719613  | KD2-H4K8ac_peak_16139 | 8.55271  |                                                   |
| 2  | 1719835  | 1720098  | KD2-H4K8ac_peak_16140 | 6.65673  |                                                   |
| 2  | 1734025  | 1734557  | KD2-H4K8ac_peak_16141 | 6.40297  |                                                   |
| 2  | 1735183  | 1735594  | KD2-H4K8ac_peak_16142 | 8.90799  |                                                   |
| 2  | 1747674  | 1748110  | KD2-H4K8ac_peak_16143 | 14.48922 | PXDN_ENSG00000130508                              |
| 2  | 1748356  | 1748923  | KD2-H4K8ac_peak_16144 | 5.6845   | PXDN_ENSG00000130508                              |

|   |         |         |                       |          |                       |
|---|---------|---------|-----------------------|----------|-----------------------|
| 2 | 1820518 | 1820718 | KD2-H4K8ac_peak_16145 | 4.86324  |                       |
| 2 | 1870928 | 1871124 | KD2-H4K8ac_peak_16146 | 5.82799  |                       |
| 2 | 1972565 | 1972770 | KD2-H4K8ac_peak_16147 | 8.1235   |                       |
| 2 | 2110656 | 2111030 | KD2-H4K8ac_peak_16148 | 6.30607  |                       |
| 2 | 2111651 | 2112060 | KD2-H4K8ac_peak_16149 | 7.20567  |                       |
| 2 | 2112956 | 2113180 | KD2-H4K8ac_peak_16150 | 7.07117  |                       |
| 2 | 2114537 | 2115165 | KD2-H4K8ac_peak_16151 | 8.85813  |                       |
| 2 | 2116635 | 2117348 | KD2-H4K8ac_peak_16152 | 5.4779   |                       |
| 2 | 2156950 | 2157315 | KD2-H4K8ac_peak_16153 | 4.67342  |                       |
| 2 | 2192911 | 2193202 | KD2-H4K8ac_peak_16154 | 7.81657  |                       |
| 2 | 2195558 | 2196018 | KD2-H4K8ac_peak_16155 | 5.72327  |                       |
| 2 | 2196794 | 2197066 | KD2-H4K8ac_peak_16156 | 5.54647  |                       |
| 2 | 2256882 | 2257074 | KD2-H4K8ac_peak_16157 | 6.2781   |                       |
| 2 | 2275321 | 2275570 | KD2-H4K8ac_peak_16158 | 4.06758  |                       |
| 2 | 2326042 | 2326408 | KD2-H4K8ac_peak_16159 | 3.75035  |                       |
| 2 | 2327872 | 2328577 | KD2-H4K8ac_peak_16160 | 6.90231  |                       |
| 2 | 2329955 | 2330161 | KD2-H4K8ac_peak_16161 | 6.66692  |                       |
| 2 | 2335812 | 2336092 | KD2-H4K8ac_peak_16162 | 4.211    | MYT1L_ENSG00000186487 |
| 2 | 2336357 | 2336620 | KD2-H4K8ac_peak_16163 | 5.57044  |                       |
| 2 | 2337111 | 2337385 | KD2-H4K8ac_peak_16164 | 13.62729 |                       |
| 2 | 2467933 | 2468389 | KD2-H4K8ac_peak_16165 | 6.25869  |                       |
| 2 | 2527374 | 2527647 | KD2-H4K8ac_peak_16166 | 4.53319  |                       |
| 2 | 2585491 | 2585746 | KD2-H4K8ac_peak_16167 | 7.0754   |                       |
| 2 | 2616997 | 2617238 | KD2-H4K8ac_peak_16168 | 10.19949 |                       |
| 2 | 2617620 | 2618491 | KD2-H4K8ac_peak_16169 | 11.05467 |                       |
| 2 | 2737812 | 2738033 | KD2-H4K8ac_peak_16170 | 5.82799  |                       |
| 2 | 2751737 | 2751984 | KD2-H4K8ac_peak_16171 | 6.50882  |                       |
| 2 | 2791084 | 2791315 | KD2-H4K8ac_peak_16172 | 6.67092  |                       |
| 2 | 2849557 | 2850912 | KD2-H4K8ac_peak_16173 | 11.28831 |                       |
| 2 | 2851237 | 2851484 | KD2-H4K8ac_peak_16174 | 8.87149  |                       |
| 2 | 2851997 | 2852490 | KD2-H4K8ac_peak_16175 | 13.10449 |                       |
| 2 | 2852788 | 2855022 | KD2-H4K8ac_peak_16176 | 22.66567 |                       |
| 2 | 2855662 | 2856060 | KD2-H4K8ac_peak_16177 | 9.11876  |                       |
| 2 | 2870983 | 2871180 | KD2-H4K8ac_peak_16178 | 4.211    |                       |
| 2 | 2922794 | 2923507 | KD2-H4K8ac_peak_16179 | 10.87093 |                       |
| 2 | 2923943 | 2924144 | KD2-H4K8ac_peak_16180 | 4.44527  |                       |
| 2 | 2937162 | 2937731 | KD2-H4K8ac_peak_16181 | 12.30509 |                       |
| 2 | 2937975 | 2938338 | KD2-H4K8ac_peak_16182 | 5.30799  |                       |
| 2 | 2979713 | 2980011 | KD2-H4K8ac_peak_16183 | 6.99815  |                       |
| 2 | 3045060 | 3045399 | KD2-H4K8ac_peak_16184 | 9.55894  |                       |
| 2 | 3045917 | 3046357 | KD2-H4K8ac_peak_16185 | 5.78173  |                       |
| 2 | 3046672 | 3047002 | KD2-H4K8ac_peak_16186 | 7.38799  |                       |
| 2 | 3080809 | 3081884 | KD2-H4K8ac_peak_16187 | 15.69572 |                       |
| 2 | 3101627 | 3101957 | KD2-H4K8ac_peak_16188 | 6.93012  |                       |
| 2 | 3103006 | 3103850 | KD2-H4K8ac_peak_16189 | 7.146    |                       |
| 2 | 3104316 | 3105286 | KD2-H4K8ac_peak_16190 | 21.09086 |                       |

|   |         |         |                       |          |                                                     |
|---|---------|---------|-----------------------|----------|-----------------------------------------------------|
| 2 | 3105716 | 3107228 | KD2-H4K8ac_peak_16191 | 26.9893  |                                                     |
| 2 | 3108083 | 3108581 | KD2-H4K8ac_peak_16192 | 20.17267 |                                                     |
| 2 | 3109497 | 3110288 | KD2-H4K8ac_peak_16193 | 9.91109  |                                                     |
| 2 | 3111943 | 3112270 | KD2-H4K8ac_peak_16194 | 9.20193  |                                                     |
| 2 | 3115561 | 3115814 | KD2-H4K8ac_peak_16195 | 8.30974  |                                                     |
| 2 | 3118293 | 3118508 | KD2-H4K8ac_peak_16196 | 5.14125  |                                                     |
| 2 | 3121135 | 3121944 | KD2-H4K8ac_peak_16197 | 8.02571  |                                                     |
| 2 | 3129243 | 3130587 | KD2-H4K8ac_peak_16198 | 22.03039 | AC019118.2_ENSG00000234423                          |
| 2 | 3130809 | 3131079 | KD2-H4K8ac_peak_16199 | 9.26408  |                                                     |
| 2 | 3131545 | 3132063 | KD2-H4K8ac_peak_16200 | 21.46903 |                                                     |
| 2 | 3132596 | 3133510 | KD2-H4K8ac_peak_16201 | 7.73264  |                                                     |
| 2 | 3133873 | 3135697 | KD2-H4K8ac_peak_16202 | 14.63458 |                                                     |
| 2 | 3204729 | 3204941 | KD2-H4K8ac_peak_16203 | 9.62006  |                                                     |
| 2 | 3285740 | 3286253 | KD2-H4K8ac_peak_16204 | 3.97079  |                                                     |
| 2 | 3286973 | 3287374 | KD2-H4K8ac_peak_16205 | 6.25869  |                                                     |
| 2 | 3305714 | 3305934 | KD2-H4K8ac_peak_16206 | 7.54159  | TSSC1-IT1_ENSG00000224885                           |
| 2 | 3306265 | 3306494 | KD2-H4K8ac_peak_16207 | 7.07117  |                                                     |
| 2 | 3306722 | 3307361 | KD2-H4K8ac_peak_16208 | 17.09549 |                                                     |
| 2 | 3316836 | 3317830 | KD2-H4K8ac_peak_16209 | 9.95759  |                                                     |
| 2 | 3318442 | 3318769 | KD2-H4K8ac_peak_16210 | 9.8391   |                                                     |
| 2 | 3381236 | 3381452 | KD2-H4K8ac_peak_16211 | 9.20193  | TSSC1_ENSG00000032389                               |
| 2 | 3381987 | 3382371 | KD2-H4K8ac_peak_16212 | 8.88082  | TSSC1_ENSG00000032389                               |
| 2 | 3451827 | 3452690 | KD2-H4K8ac_peak_16213 | 15.61381 |                                                     |
| 2 | 3463438 | 3463699 | KD2-H4K8ac_peak_16214 | 6.45063  |                                                     |
| 2 | 3497070 | 3497597 | KD2-H4K8ac_peak_16215 | 5.3608   |                                                     |
| 2 | 3522197 | 3522590 | KD2-H4K8ac_peak_16216 | 7.25989  | AD11_ENSG00000182551;AC142528.1_ENSG00000235078     |
| 2 | 3523037 | 3523861 | KD2-H4K8ac_peak_16217 | 24.70186 | AD11_ENSG00000182551;AC142528.1_ENSG00000235078     |
| 2 | 3605517 | 3605920 | KD2-H4K8ac_peak_16218 | 13.02811 | RNASEH1_ENSG00000171865;RNASEH1-AS1_ENSG00000234171 |
| 2 | 3606166 | 3606829 | KD2-H4K8ac_peak_16219 | 11.05467 | RNASEH1_ENSG00000171865;RNASEH1-AS1_ENSG00000234171 |
| 2 | 3622228 | 3622721 | KD2-H4K8ac_peak_16220 | 18.40451 | RPS7_ENSG00000171863                                |
| 2 | 3622925 | 3623465 | KD2-H4K8ac_peak_16221 | 11.66477 | RPS7_ENSG00000171863                                |
| 2 | 3632687 | 3633387 | KD2-H4K8ac_peak_16222 | 10.72313 |                                                     |
| 2 | 3633604 | 3633962 | KD2-H4K8ac_peak_16223 | 4.85908  |                                                     |
| 2 | 3642064 | 3643293 | KD2-H4K8ac_peak_16224 | 10.09705 | COLEC11_ENSG00000118004                             |
| 2 | 3650096 | 3650431 | KD2-H4K8ac_peak_16225 | 9.48511  |                                                     |
| 2 | 3650688 | 3651821 | KD2-H4K8ac_peak_16226 | 12.93209 | AC010907.2_ENSG00000237370                          |
| 2 | 3652202 | 3652399 | KD2-H4K8ac_peak_16227 | 7.11824  | AC010907.2_ENSG00000237370                          |
| 2 | 3653326 | 3654627 | KD2-H4K8ac_peak_16228 | 20.64015 |                                                     |
| 2 | 3655192 | 3655690 | KD2-H4K8ac_peak_16229 | 11.24702 |                                                     |
| 2 | 3656176 | 3656637 | KD2-H4K8ac_peak_16230 | 3.83717  |                                                     |
| 2 | 3657150 | 3657584 | KD2-H4K8ac_peak_16231 | 6.65673  |                                                     |
| 2 | 3681144 | 3681387 | KD2-H4K8ac_peak_16232 | 5.20998  |                                                     |
| 2 | 3697817 | 3698517 | KD2-H4K8ac_peak_16233 | 10.20046 |                                                     |
| 2 | 3751441 | 3751919 | KD2-H4K8ac_peak_16234 | 14.48084 | AC010907.5_ENSG00000224661;DCDC2C_ENSG00000214866   |
| 2 | 5619471 | 5619741 | KD2-H4K8ac_peak_16235 | 8.4716   |                                                     |
| 2 | 5660626 | 5660822 | KD2-H4K8ac_peak_16236 | 6.24114  |                                                     |

|   |         |         |                       |          |                                                                             |
|---|---------|---------|-----------------------|----------|-----------------------------------------------------------------------------|
| 2 | 5661747 | 5662193 | KD2-H4K8ac_peak_16237 | 6.83936  |                                                                             |
| 2 | 5663523 | 5663716 | KD2-H4K8ac_peak_16238 | 4.54838  |                                                                             |
| 2 | 5679302 | 5680109 | KD2-H4K8ac_peak_16239 | 10.59312 |                                                                             |
| 2 | 5806363 | 5806785 | KD2-H4K8ac_peak_16240 | 4.86324  |                                                                             |
| 2 | 5813435 | 5814215 | KD2-H4K8ac_peak_16241 | 17.75427 |                                                                             |
| 2 | 5830941 | 5831388 | KD2-H4K8ac_peak_16242 | 9.95119  | AC107057.2_ENSG00000224128;AC108025.2_ENSG00000230090                       |
| 2 | 5831594 | 5832309 | KD2-H4K8ac_peak_16243 | 14.68449 | AC107057.2_ENSG00000224128;AC108025.2_ENSG00000230090;SOX11_ENSG00000176887 |
| 2 | 5833051 | 5833372 | KD2-H4K8ac_peak_16244 | 7.50083  | SOX11_ENSG00000176887                                                       |
| 2 | 5836062 | 5837282 | KD2-H4K8ac_peak_16245 | 9.1707   | AC010729.1_ENSG00000242540                                                  |
| 2 | 5979299 | 5979986 | KD2-H4K8ac_peak_16246 | 6.25869  |                                                                             |
| 2 | 5981326 | 5981548 | KD2-H4K8ac_peak_16247 | 6.0605   |                                                                             |
| 2 | 5982723 | 5982927 | KD2-H4K8ac_peak_16248 | 3.75035  |                                                                             |
| 2 | 5990869 | 5991229 | KD2-H4K8ac_peak_16249 | 5.34946  |                                                                             |
| 2 | 6052715 | 6052953 | KD2-H4K8ac_peak_16250 | 9.36516  |                                                                             |
| 2 | 6067056 | 6067495 | KD2-H4K8ac_peak_16251 | 6.65673  |                                                                             |
| 2 | 6072946 | 6073365 | KD2-H4K8ac_peak_16252 | 8.4814   | LINC01105_ENSG00000232044                                                   |
| 2 | 6078624 | 6078835 | KD2-H4K8ac_peak_16253 | 4.71229  |                                                                             |
| 2 | 6120639 | 6121140 | KD2-H4K8ac_peak_16254 | 8.87852  |                                                                             |
| 2 | 6121454 | 6122131 | KD2-H4K8ac_peak_16255 | 11.05155 |                                                                             |
| 2 | 6209637 | 6209833 | KD2-H4K8ac_peak_16256 | 7.54952  |                                                                             |
| 2 | 6212859 | 6213178 | KD2-H4K8ac_peak_16257 | 8.4716   |                                                                             |
| 2 | 6213781 | 6214080 | KD2-H4K8ac_peak_16258 | 5.88845  |                                                                             |
| 2 | 6214378 | 6214812 | KD2-H4K8ac_peak_16259 | 13.35153 |                                                                             |
| 2 | 6217246 | 6217475 | KD2-H4K8ac_peak_16260 | 5.88845  |                                                                             |
| 2 | 6220711 | 6221036 | KD2-H4K8ac_peak_16261 | 11.28831 |                                                                             |
| 2 | 6223024 | 6223423 | KD2-H4K8ac_peak_16262 | 8.34752  |                                                                             |
| 2 | 6251643 | 6251878 | KD2-H4K8ac_peak_16263 | 7.15405  |                                                                             |
| 2 | 6271548 | 6271840 | KD2-H4K8ac_peak_16264 | 11.75669 |                                                                             |
| 2 | 6324914 | 6325133 | KD2-H4K8ac_peak_16265 | 3.75035  |                                                                             |
| 2 | 6392714 | 6392912 | KD2-H4K8ac_peak_16266 | 6.82976  |                                                                             |
| 2 | 6429500 | 6430049 | KD2-H4K8ac_peak_16267 | 9.26287  |                                                                             |
| 2 | 6430795 | 6431170 | KD2-H4K8ac_peak_16268 | 9.57101  |                                                                             |
| 2 | 6450796 | 6451302 | KD2-H4K8ac_peak_16269 | 15.61313 |                                                                             |
| 2 | 6451547 | 6451808 | KD2-H4K8ac_peak_16270 | 4.86324  |                                                                             |
| 2 | 6651047 | 6651278 | KD2-H4K8ac_peak_16271 | 8.80225  |                                                                             |
| 2 | 6662097 | 6662390 | KD2-H4K8ac_peak_16272 | 5.16215  |                                                                             |
| 2 | 6663608 | 6663864 | KD2-H4K8ac_peak_16273 | 8.30974  |                                                                             |
| 2 | 6665586 | 6666123 | KD2-H4K8ac_peak_16274 | 12.70959 |                                                                             |
| 2 | 6675052 | 6675253 | KD2-H4K8ac_peak_16275 | 5.64449  |                                                                             |
| 2 | 6910200 | 6910644 | KD2-H4K8ac_peak_16276 | 8.85813  | LINC00487_ENSG00000205837                                                   |
| 2 | 6912237 | 6912855 | KD2-H4K8ac_peak_16277 | 9.96798  |                                                                             |
| 2 | 6968205 | 6968420 | KD2-H4K8ac_peak_16278 | 7.44366  |                                                                             |
| 2 | 7005166 | 7006182 | KD2-H4K8ac_peak_16279 | 13.97093 | CMPK2_ENSG00000134326;RSAD2_ENSG00000134321                                 |
| 2 | 7057077 | 7057376 | KD2-H4K8ac_peak_16280 | 9.36516  | RNF144A_ENSG00000151692                                                     |
| 2 | 7057646 | 7058620 | KD2-H4K8ac_peak_16281 | 11.24702 | RNF144A-AS1_ENSG00000228203;RNF144A_ENSG00000151692                         |
| 2 | 7133503 | 7133799 | KD2-H4K8ac_peak_16282 | 5.30799  |                                                                             |

|   |         |         |                       |          |                                                |
|---|---------|---------|-----------------------|----------|------------------------------------------------|
| 2 | 7134760 | 7135257 | KD2-H4K8ac_peak_16283 | 7.76329  |                                                |
| 2 | 7147603 | 7149053 | KD2-H4K8ac_peak_16284 | 8.35267  |                                                |
| 2 | 7149265 | 7149532 | KD2-H4K8ac_peak_16285 | 5.32397  |                                                |
| 2 | 7155166 | 7155593 | KD2-H4K8ac_peak_16286 | 5.32397  |                                                |
| 2 | 7157104 | 7157318 | KD2-H4K8ac_peak_16287 | 8.01338  |                                                |
| 2 | 7158150 | 7158589 | KD2-H4K8ac_peak_16288 | 13.73635 |                                                |
| 2 | 7160208 | 7160429 | KD2-H4K8ac_peak_16289 | 4.211    |                                                |
| 2 | 7237810 | 7238184 | KD2-H4K8ac_peak_16290 | 11.58876 |                                                |
| 2 | 8333980 | 8334243 | KD2-H4K8ac_peak_16291 | 6.2781   |                                                |
| 2 | 8369665 | 8369921 | KD2-H4K8ac_peak_16292 | 7.52168  |                                                |
| 2 | 8422249 | 8422588 | KD2-H4K8ac_peak_16293 | 4.67342  |                                                |
| 2 | 8442631 | 8442947 | KD2-H4K8ac_peak_16294 | 8.85813  |                                                |
| 2 | 8675870 | 8676302 | KD2-H4K8ac_peak_16295 | 4.37809  |                                                |
| 2 | 8676591 | 8676829 | KD2-H4K8ac_peak_16296 | 8.10216  |                                                |
| 2 | 8677049 | 8677364 | KD2-H4K8ac_peak_16297 | 9.91109  |                                                |
| 2 | 8679775 | 8680027 | KD2-H4K8ac_peak_16298 | 11.38464 |                                                |
| 2 | 8680357 | 8680707 | KD2-H4K8ac_peak_16299 | 7.92775  |                                                |
| 2 | 8683718 | 8684240 | KD2-H4K8ac_peak_16300 | 9.78882  |                                                |
| 2 | 8685597 | 8685835 | KD2-H4K8ac_peak_16301 | 4.211    |                                                |
| 2 | 8816920 | 8817814 | KD2-H4K8ac_peak_16302 | 8.55271  |                                                |
| 2 | 8818340 | 8818715 | KD2-H4K8ac_peak_16303 | 7.36799  | ID2_ENSG00000115738                            |
| 2 | 8819198 | 8819788 | KD2-H4K8ac_peak_16304 | 8.63033  | ID2_ENSG00000115738                            |
| 2 | 8825112 | 8825868 | KD2-H4K8ac_peak_16305 | 10.43145 |                                                |
| 2 | 8833666 | 8834066 | KD2-H4K8ac_peak_16306 | 8.85813  |                                                |
| 2 | 8977306 | 8977670 | KD2-H4K8ac_peak_16307 | 6.66692  | KIDINS220_ENSG00000134313                      |
| 2 | 9143548 | 9143848 | KD2-H4K8ac_peak_16308 | 10.45683 | MBOAT2_ENSG00000143797                         |
| 2 | 9144249 | 9144744 | KD2-H4K8ac_peak_16309 | 13.95627 | MBOAT2_ENSG00000143797                         |
| 2 | 9201438 | 9201636 | KD2-H4K8ac_peak_16310 | 6.25869  |                                                |
| 2 | 9324075 | 9324473 | KD2-H4K8ac_peak_16311 | 9.36665  |                                                |
| 2 | 9346360 | 9346726 | KD2-H4K8ac_peak_16312 | 28.09984 | ASAP2_ENSG00000151693                          |
| 2 | 9346920 | 9347997 | KD2-H4K8ac_peak_16313 | 16.8435  | ASAP2_ENSG00000151693                          |
| 2 | 9358423 | 9358620 | KD2-H4K8ac_peak_16314 | 4.62142  |                                                |
| 2 | 9370527 | 9370776 | KD2-H4K8ac_peak_16315 | 5.98692  |                                                |
| 2 | 9371753 | 9372064 | KD2-H4K8ac_peak_16316 | 4.44527  |                                                |
| 2 | 9374392 | 9374633 | KD2-H4K8ac_peak_16317 | 9.41741  |                                                |
| 2 | 9374836 | 9375147 | KD2-H4K8ac_peak_16318 | 5.81222  |                                                |
| 2 | 9375621 | 9376317 | KD2-H4K8ac_peak_16319 | 8.0287   |                                                |
| 2 | 9377652 | 9377901 | KD2-H4K8ac_peak_16320 | 5.81222  |                                                |
| 2 | 9386834 | 9387303 | KD2-H4K8ac_peak_16321 | 13.13965 |                                                |
| 2 | 9387750 | 9387986 | KD2-H4K8ac_peak_16322 | 8.10216  |                                                |
| 2 | 9389194 | 9389518 | KD2-H4K8ac_peak_16323 | 7.51682  |                                                |
| 2 | 9391203 | 9391515 | KD2-H4K8ac_peak_16324 | 8.64831  |                                                |
| 2 | 9476696 | 9476958 | KD2-H4K8ac_peak_16325 | 5.38504  |                                                |
| 2 | 9526621 | 9526869 | KD2-H4K8ac_peak_16326 | 4.90805  |                                                |
| 2 | 9563141 | 9563610 | KD2-H4K8ac_peak_16327 | 22.93827 | ITGB1BP1_ENSG00000119185;CPSF3_ENSG00000119203 |
| 2 | 9563892 | 9564318 | KD2-H4K8ac_peak_16328 | 7.73264  | ITGB1BP1_ENSG00000119185;CPSF3_ENSG00000119203 |

|   |          |          |                       |          |                                                                            |
|---|----------|----------|-----------------------|----------|----------------------------------------------------------------------------|
| 2 | 9614132  | 9615246  | KD2-H4K8ac_peak_16329 | 20.18381 | IAH1_ENSG00000134330                                                       |
| 2 | 9695433  | 9695826  | KD2-H4K8ac_peak_16330 | 12.37938 | ADAM17_ENSG00000151694;RP11-214N9.1_ENSG00000271855                        |
| 2 | 9696113  | 9696690  | KD2-H4K8ac_peak_16331 | 21.52156 | ADAM17_ENSG00000151694;RP11-214N9.1_ENSG00000271855                        |
| 2 | 9770401  | 9771092  | KD2-H4K8ac_peak_16332 | 12.08081 | YWHAQ_ENSG00000134308                                                      |
| 2 | 9771500  | 9771787  | KD2-H4K8ac_peak_16333 | 12.70959 | YWHAQ_ENSG00000134308                                                      |
| 2 | 9830466  | 9830700  | KD2-H4K8ac_peak_16334 | 7.57979  |                                                                            |
| 2 | 9893892  | 9894378  | KD2-H4K8ac_peak_16335 | 5.14125  |                                                                            |
| 2 | 9940114  | 9940478  | KD2-H4K8ac_peak_16336 | 7.74292  |                                                                            |
| 2 | 9983155  | 9983840  | KD2-H4K8ac_peak_16337 | 14.30822 | TAF1B_ENSG00000115750                                                      |
| 2 | 10092098 | 10092485 | KD2-H4K8ac_peak_16338 | 10.66719 |                                                                            |
| 2 | 10146593 | 10146894 | KD2-H4K8ac_peak_16339 | 7.62396  | AC010969.1_ENSG00000188525                                                 |
| 2 | 10149876 | 10150200 | KD2-H4K8ac_peak_16340 | 4.73897  |                                                                            |
| 2 | 10183769 | 10184210 | KD2-H4K8ac_peak_16341 | 12.93209 | KLF11_ENSG00000172059                                                      |
| 2 | 10197691 | 10197990 | KD2-H4K8ac_peak_16342 | 4.86574  |                                                                            |
| 2 | 10219753 | 10220197 | KD2-H4K8ac_peak_16343 | 6.60096  | CYS1_ENSG00000205795                                                       |
| 2 | 10259864 | 10260359 | KD2-H4K8ac_peak_16344 | 9.67696  | RP11-254F7.4_ENSG00000272524                                               |
| 2 | 10260631 | 10260853 | KD2-H4K8ac_peak_16345 | 9.78882  | RP11-254F7.4_ENSG00000272524                                               |
| 2 | 10262125 | 10262643 | KD2-H4K8ac_peak_16346 | 6.40874  | RRM2_ENSG00000171848                                                       |
| 2 | 10310656 | 10310911 | KD2-H4K8ac_peak_16347 | 7.07117  |                                                                            |
| 2 | 10394574 | 10395269 | KD2-H4K8ac_peak_16348 | 8.59579  |                                                                            |
| 2 | 10425444 | 10427484 | KD2-H4K8ac_peak_16349 | 27.99951 |                                                                            |
| 2 | 10442263 | 10442796 | KD2-H4K8ac_peak_16350 | 10.70697 | HPCAL1_ENSG00000115756                                                     |
| 2 | 10471347 | 10471568 | KD2-H4K8ac_peak_16351 | 4.37815  |                                                                            |
| 2 | 10482773 | 10482981 | KD2-H4K8ac_peak_16352 | 3.86308  |                                                                            |
| 2 | 10483716 | 10484142 | KD2-H4K8ac_peak_16353 | 5.13615  |                                                                            |
| 2 | 10487861 | 10488111 | KD2-H4K8ac_peak_16354 | 4.56666  |                                                                            |
| 2 | 10501117 | 10501387 | KD2-H4K8ac_peak_16355 | 6.65673  |                                                                            |
| 2 | 10502574 | 10502948 | KD2-H4K8ac_peak_16356 | 8.55271  |                                                                            |
| 2 | 10529397 | 10529604 | KD2-H4K8ac_peak_16357 | 4.98639  |                                                                            |
| 2 | 10530774 | 10531463 | KD2-H4K8ac_peak_16358 | 10.39103 |                                                                            |
| 2 | 10531942 | 10532423 | KD2-H4K8ac_peak_16359 | 7.36799  |                                                                            |
| 2 | 10532790 | 10533146 | KD2-H4K8ac_peak_16360 | 9.26408  |                                                                            |
| 2 | 10533609 | 10535113 | KD2-H4K8ac_peak_16361 | 9.87773  |                                                                            |
| 2 | 10544564 | 10545473 | KD2-H4K8ac_peak_16362 | 8.04448  |                                                                            |
| 2 | 10587842 | 10588567 | KD2-H4K8ac_peak_16363 | 16.67374 | ODC1_ENSG00000115758;SNORA80B_ENSG00000206633;RP11-320M2.1_ENSG00000257135 |
| 2 | 10588818 | 10589244 | KD2-H4K8ac_peak_16364 | 26.9893  | ODC1_ENSG00000115758;RP11-320M2.1_ENSG00000257135                          |
| 2 | 10688719 | 10689030 | KD2-H4K8ac_peak_16365 | 17.8737  |                                                                            |
| 2 | 10689432 | 10689642 | KD2-H4K8ac_peak_16366 | 3.86308  |                                                                            |
| 2 | 10689928 | 10690214 | KD2-H4K8ac_peak_16367 | 4.0809   |                                                                            |
| 2 | 10829865 | 10830987 | KD2-H4K8ac_peak_16368 | 8.25648  | NOL10_ENSG00000115761;RN7SL832P_ENSG00000243819                            |
| 2 | 10952057 | 10952500 | KD2-H4K8ac_peak_16369 | 4.33139  |                                                                            |
| 2 | 10955644 | 10955838 | KD2-H4K8ac_peak_16370 | 6.76298  | RNU7-176P_ENSG00000238962                                                  |
| 2 | 11008635 | 11009186 | KD2-H4K8ac_peak_16371 | 9.6247   |                                                                            |
| 2 | 11052165 | 11052498 | KD2-H4K8ac_peak_16372 | 5.9696   | KCNF1_ENSG00000162975                                                      |
| 2 | 11075463 | 11075655 | KD2-H4K8ac_peak_16373 | 4.35724  |                                                                            |
| 2 | 11270360 | 11270582 | KD2-H4K8ac_peak_16374 | 9.61895  |                                                                            |



|   |          |          |                       |          |                                                    |
|---|----------|----------|-----------------------|----------|----------------------------------------------------|
| 2 | 11272344 | 11272948 | KD2-H4K8ac_peak_16375 | 7.36799  | AC062028.1_ENSG00000145063;C2orf50_ENSG00000150873 |
| 2 | 11273192 | 11273744 | KD2-H4K8ac_peak_16376 | 10.21366 | AC062028.1_ENSG00000145063;C2orf50_ENSG00000150873 |
| 2 | 11294842 | 11295178 | KD2-H4K8ac_peak_16377 | 9.36516  | PQLC3_ENSG00000162976                              |
| 2 | 11295587 | 11296028 | KD2-H4K8ac_peak_16378 | 13.12288 | PQLC3_ENSG00000162976                              |
| 2 | 11484178 | 11484691 | KD2-H4K8ac_peak_16379 | 13.3695  |                                                    |
| 2 | 11484970 | 11485670 | KD2-H4K8ac_peak_16380 | 26.92276 |                                                    |
| 2 | 11527424 | 11527800 | KD2-H4K8ac_peak_16381 | 7.43041  |                                                    |
| 2 | 11605560 | 11606201 | KD2-H4K8ac_peak_16382 | 6.52179  | E2F6_ENSG00000169016                               |
| 2 | 11606517 | 11606815 | KD2-H4K8ac_peak_16383 | 6.20982  | E2F6_ENSG00000169016                               |
| 2 | 11622265 | 11622791 | KD2-H4K8ac_peak_16384 | 13.92465 |                                                    |
| 2 | 11623005 | 11623740 | KD2-H4K8ac_peak_16385 | 11.3923  |                                                    |
| 2 | 11780636 | 11780832 | KD2-H4K8ac_peak_16386 | 4.8888   |                                                    |
| 2 | 11822091 | 11822289 | KD2-H4K8ac_peak_16387 | 11.50346 | AC106875.1_ENSG00000228496                         |
| 2 | 11836724 | 11837905 | KD2-H4K8ac_peak_16388 | 11.80283 |                                                    |
| 2 | 11886157 | 11886627 | KD2-H4K8ac_peak_16389 | 7.49599  | AC012456.4_ENSG00000230790                         |
| 2 | 11886893 | 11887357 | KD2-H4K8ac_peak_16390 | 9.95119  |                                                    |
| 2 | 11969792 | 11970284 | KD2-H4K8ac_peak_16391 | 6.18657  |                                                    |
| 2 | 12070626 | 12071154 | KD2-H4K8ac_peak_16392 | 8.30974  |                                                    |
| 2 | 12222782 | 12223012 | KD2-H4K8ac_peak_16393 | 6.40297  |                                                    |
| 2 | 12856691 | 12856891 | KD2-H4K8ac_peak_16394 | 9.65086  | TRIB2_ENSG00000071575                              |
| 2 | 12857118 | 12857675 | KD2-H4K8ac_peak_16395 | 8.86099  | TRIB2_ENSG00000071575                              |
| 2 | 13087723 | 13088080 | KD2-H4K8ac_peak_16396 | 14.15075 |                                                    |
| 2 | 13088769 | 13089640 | KD2-H4K8ac_peak_16397 | 12.06346 |                                                    |
| 2 | 14453978 | 14454175 | KD2-H4K8ac_peak_16398 | 7.38933  |                                                    |
| 2 | 14772273 | 14772683 | KD2-H4K8ac_peak_16399 | 12.08081 | FAM84A_ENSG00000162981                             |
| 2 | 14774165 | 14774529 | KD2-H4K8ac_peak_16400 | 5.38581  | AC011897.1_ENSG00000265629                         |
| 2 | 14774879 | 14775659 | KD2-H4K8ac_peak_16401 | 16.33377 | AC011897.1_ENSG00000265629                         |
| 2 | 15701596 | 15702123 | KD2-H4K8ac_peak_16402 | 8.55271  | NBAS_ENSG00000151779                               |
| 2 | 15731190 | 15732420 | KD2-H4K8ac_peak_16403 | 16.25682 | DDX1_ENSG00000079785                               |
| 2 | 15965910 | 15966218 | KD2-H4K8ac_peak_16404 | 5.30799  |                                                    |
| 2 | 15982028 | 15982292 | KD2-H4K8ac_peak_16405 | 10.31695 |                                                    |
| 2 | 15982668 | 15983008 | KD2-H4K8ac_peak_16406 | 10.92268 |                                                    |
| 2 | 15983390 | 15984446 | KD2-H4K8ac_peak_16407 | 23.24123 |                                                    |
| 2 | 15986321 | 15986536 | KD2-H4K8ac_peak_16408 | 8.2413   |                                                    |
| 2 | 16031575 | 16031842 | KD2-H4K8ac_peak_16409 | 10.84242 |                                                    |
| 2 | 16080211 | 16080419 | KD2-H4K8ac_peak_16410 | 7.18615  | MYCN_ENSG00000134323                               |
| 2 | 16080907 | 16081425 | KD2-H4K8ac_peak_16411 | 4.28151  | MYCNOS_ENSG00000233718;MYCN_ENSG00000134323        |
| 2 | 16124317 | 16125304 | KD2-H4K8ac_peak_16412 | 13.10449 |                                                    |
| 2 | 16210432 | 16210708 | KD2-H4K8ac_peak_16413 | 5.88845  |                                                    |
| 2 | 16216869 | 16217088 | KD2-H4K8ac_peak_16414 | 7.04492  |                                                    |
| 2 | 16234775 | 16235287 | KD2-H4K8ac_peak_16415 | 9.63487  |                                                    |
| 2 | 16378531 | 16379338 | KD2-H4K8ac_peak_16416 | 16.33377 |                                                    |
| 2 | 16380345 | 16380830 | KD2-H4K8ac_peak_16417 | 10.46874 | SNORA40_ENSG00000251704                            |
| 2 | 16408040 | 16408246 | KD2-H4K8ac_peak_16418 | 7.76329  |                                                    |
| 2 | 16513141 | 16513385 | KD2-H4K8ac_peak_16419 | 5.88845  |                                                    |
| 2 | 16516261 | 16516481 | KD2-H4K8ac_peak_16420 | 6.24114  |                                                    |

|   |          |          |                       |          |                                                      |
|---|----------|----------|-----------------------|----------|------------------------------------------------------|
| 2 | 16517040 | 16517295 | KD2-H4K8ac_peak_16421 | 8.83582  |                                                      |
| 2 | 16575449 | 16575724 | KD2-H4K8ac_peak_16422 | 8.4716   |                                                      |
| 2 | 16689308 | 16689607 | KD2-H4K8ac_peak_16423 | 11.76169 |                                                      |
| 2 | 17180538 | 17180743 | KD2-H4K8ac_peak_16424 | 5.14125  |                                                      |
| 2 | 17181813 | 17182061 | KD2-H4K8ac_peak_16425 | 11.07495 |                                                      |
| 2 | 17190506 | 17190831 | KD2-H4K8ac_peak_16426 | 6.72334  |                                                      |
| 2 | 17192100 | 17192362 | KD2-H4K8ac_peak_16427 | 9.59814  |                                                      |
| 2 | 17199175 | 17199412 | KD2-H4K8ac_peak_16428 | 4.3015   |                                                      |
| 2 | 17212361 | 17212609 | KD2-H4K8ac_peak_16429 | 5.88845  |                                                      |
| 2 | 17264452 | 17264702 | KD2-H4K8ac_peak_16430 | 10.05606 |                                                      |
| 2 | 17266631 | 17266865 | KD2-H4K8ac_peak_16431 | 6.92624  |                                                      |
| 2 | 17267844 | 17268355 | KD2-H4K8ac_peak_16432 | 10.05606 |                                                      |
| 2 | 17490581 | 17490892 | KD2-H4K8ac_peak_16433 | 4.06758  |                                                      |
| 2 | 17719420 | 17719660 | KD2-H4K8ac_peak_16434 | 4.89359  | VSNL1_ENSG00000163032                                |
| 2 | 17720381 | 17720701 | KD2-H4K8ac_peak_16435 | 9.95119  | VSNL1_ENSG00000163032                                |
| 2 | 17721422 | 17721701 | KD2-H4K8ac_peak_16436 | 17.67328 |                                                      |
| 2 | 17751986 | 17752193 | KD2-H4K8ac_peak_16437 | 4.89656  |                                                      |
| 2 | 17934689 | 17935889 | KD2-H4K8ac_peak_16438 | 21.11201 | GEN1_ENSG00000178295                                 |
| 2 | 18741376 | 18741822 | KD2-H4K8ac_peak_16439 | 10.39576 | RDH14_ENSG00000240857                                |
| 2 | 18742467 | 18742735 | KD2-H4K8ac_peak_16440 | 5.98124  | RDH14_ENSG00000240857                                |
| 2 | 18784969 | 18785275 | KD2-H4K8ac_peak_16441 | 4.20044  |                                                      |
| 2 | 19547401 | 19547708 | KD2-H4K8ac_peak_16442 | 12.13241 | MIR4757_ENSG00000266738;AC092594.1_ENSG00000236204   |
| 2 | 20101009 | 20102224 | KD2-H4K8ac_peak_16443 | 14.17488 | TTC32_ENSG00000183891;RP11-79O8.1_ENSG00000271991    |
| 2 | 20103071 | 20103269 | KD2-H4K8ac_peak_16444 | 7.07512  |                                                      |
| 2 | 20123719 | 20124318 | KD2-H4K8ac_peak_16445 | 10.05606 |                                                      |
| 2 | 20190035 | 20190294 | KD2-H4K8ac_peak_16446 | 14.39182 | WDR35_ENSG00000118965;AC079145.4_ENSG00000227210     |
| 2 | 20210934 | 20211176 | KD2-H4K8ac_peak_16447 | 7.47462  |                                                      |
| 2 | 20211747 | 20212915 | KD2-H4K8ac_peak_16448 | 21.09086 | MATN3_ENSG00000132031                                |
| 2 | 20251640 | 20252675 | KD2-H4K8ac_peak_16449 | 20.10577 | LAPTM4A_ENSG00000068697;RP11-644K8.1_ENSG00000223734 |
| 2 | 20266086 | 20266535 | KD2-H4K8ac_peak_16450 | 5.59859  |                                                      |
| 2 | 20270248 | 20270947 | KD2-H4K8ac_peak_16451 | 11.9364  |                                                      |
| 2 | 20271241 | 20271467 | KD2-H4K8ac_peak_16452 | 7.28628  |                                                      |
| 2 | 20272470 | 20273165 | KD2-H4K8ac_peak_16453 | 9.95342  |                                                      |
| 2 | 20274020 | 20275027 | KD2-H4K8ac_peak_16454 | 7.11824  |                                                      |
| 2 | 20335509 | 20335713 | KD2-H4K8ac_peak_16455 | 5.72327  |                                                      |
| 2 | 20349118 | 20349733 | KD2-H4K8ac_peak_16456 | 10.19723 |                                                      |
| 2 | 20351085 | 20351277 | KD2-H4K8ac_peak_16457 | 5.53095  |                                                      |
| 2 | 20363977 | 20364231 | KD2-H4K8ac_peak_16458 | 3.90565  |                                                      |
| 2 | 20366981 | 20367622 | KD2-H4K8ac_peak_16459 | 8.07129  |                                                      |
| 2 | 20368355 | 20369057 | KD2-H4K8ac_peak_16460 | 13.95627 |                                                      |
| 2 | 20422333 | 20422954 | KD2-H4K8ac_peak_16461 | 4.84794  |                                                      |
| 2 | 20423254 | 20424661 | KD2-H4K8ac_peak_16462 | 14.66259 | SDC1_ENSG00000115884                                 |
| 2 | 20425085 | 20425573 | KD2-H4K8ac_peak_16463 | 8.21852  | SDC1_ENSG00000115884                                 |
| 2 | 20550120 | 20550519 | KD2-H4K8ac_peak_16464 | 24.3087  |                                                      |
| 2 | 20550871 | 20551497 | KD2-H4K8ac_peak_16465 | 14.07412 | PUM2_ENSG00000055917                                 |
| 2 | 20589902 | 20590310 | KD2-H4K8ac_peak_16466 | 7.74292  |                                                      |

|   |          |          |                       |          |                                                |
|---|----------|----------|-----------------------|----------|------------------------------------------------|
| 2 | 20604000 | 20604246 | KD2-H4K8ac_peak_16467 | 8.30974  |                                                |
| 2 | 20619111 | 20619337 | KD2-H4K8ac_peak_16468 | 5.33892  |                                                |
| 2 | 20624427 | 20624838 | KD2-H4K8ac_peak_16469 | 6.30229  |                                                |
| 2 | 20646056 | 20646602 | KD2-H4K8ac_peak_16470 | 9.20193  | RHOB_ENSG00000143878                           |
| 2 | 20646875 | 20647316 | KD2-H4K8ac_peak_16471 | 17.27897 | RHOB_ENSG00000143878                           |
| 2 | 20666121 | 20666419 | KD2-H4K8ac_peak_16472 | 5.29555  |                                                |
| 2 | 20691607 | 20691864 | KD2-H4K8ac_peak_16473 | 8.36432  |                                                |
| 2 | 20706437 | 20706649 | KD2-H4K8ac_peak_16474 | 4.38478  |                                                |
| 2 | 20798789 | 20799160 | KD2-H4K8ac_peak_16475 | 9.36516  |                                                |
| 2 | 20817743 | 20818002 | KD2-H4K8ac_peak_16476 | 4.35724  |                                                |
| 2 | 20834259 | 20834585 | KD2-H4K8ac_peak_16477 | 6.92611  |                                                |
| 2 | 20834960 | 20835558 | KD2-H4K8ac_peak_16478 | 8.55271  |                                                |
| 2 | 20835861 | 20836121 | KD2-H4K8ac_peak_16479 | 8.59224  |                                                |
| 2 | 20850566 | 20850846 | KD2-H4K8ac_peak_16480 | 11.7608  | HS1BP3_ENSG00000118960                         |
| 2 | 20851062 | 20851679 | KD2-H4K8ac_peak_16481 | 14.07846 | HS1BP3_ENSG00000118960                         |
| 2 | 21021842 | 21022788 | KD2-H4K8ac_peak_16482 | 15.2334  | C2orf43_ENSG00000118961                        |
| 2 | 21023582 | 21023783 | KD2-H4K8ac_peak_16483 | 5.30494  | C2orf43_ENSG00000118961                        |
| 2 | 21213007 | 21213253 | KD2-H4K8ac_peak_16484 | 6.97919  |                                                |
| 2 | 21214117 | 21214326 | KD2-H4K8ac_peak_16485 | 5.66705  |                                                |
| 2 | 21506179 | 21506409 | KD2-H4K8ac_peak_16486 | 4.67342  |                                                |
| 2 | 21856423 | 21856662 | KD2-H4K8ac_peak_16487 | 10.0692  |                                                |
| 2 | 22258459 | 22258690 | KD2-H4K8ac_peak_16488 | 4.77079  |                                                |
| 2 | 22552159 | 22552545 | KD2-H4K8ac_peak_16489 | 4.211    |                                                |
| 2 | 23573321 | 23575277 | KD2-H4K8ac_peak_16490 | 24.75714 |                                                |
| 2 | 23607529 | 23607887 | KD2-H4K8ac_peak_16491 | 11.79585 | KLHL29_ENSG00000119771                         |
| 2 | 23608534 | 23608726 | KD2-H4K8ac_peak_16492 | 6.62457  | KLHL29_ENSG00000119771                         |
| 2 | 23755573 | 23755847 | KD2-H4K8ac_peak_16493 | 5.9696   |                                                |
| 2 | 23768028 | 23768782 | KD2-H4K8ac_peak_16494 | 11.00372 |                                                |
| 2 | 23769783 | 23770002 | KD2-H4K8ac_peak_16495 | 6.24114  |                                                |
| 2 | 23771820 | 23772094 | KD2-H4K8ac_peak_16496 | 9.18237  |                                                |
| 2 | 23772810 | 23773002 | KD2-H4K8ac_peak_16497 | 4.21775  |                                                |
| 2 | 23787271 | 23787576 | KD2-H4K8ac_peak_16498 | 5.80191  |                                                |
| 2 | 23841841 | 23842251 | KD2-H4K8ac_peak_16499 | 11.05467 |                                                |
| 2 | 23859320 | 23860869 | KD2-H4K8ac_peak_16500 | 17.42905 |                                                |
| 2 | 23891518 | 23892613 | KD2-H4K8ac_peak_16501 | 12.88702 |                                                |
| 2 | 23893015 | 23893458 | KD2-H4K8ac_peak_16502 | 8.85813  |                                                |
| 2 | 23922131 | 23922681 | KD2-H4K8ac_peak_16503 | 7.76329  |                                                |
| 2 | 24109872 | 24110085 | KD2-H4K8ac_peak_16504 | 4.37815  |                                                |
| 2 | 24149246 | 24149891 | KD2-H4K8ac_peak_16505 | 13.22091 | ATAD2B_ENSG00000119778;UBXN2A_ENSG00000173960  |
| 2 | 24150191 | 24150393 | KD2-H4K8ac_peak_16506 | 16.57619 | ATAD2B_ENSG00000119778;UBXN2A_ENSG00000173960  |
| 2 | 24162322 | 24163734 | KD2-H4K8ac_peak_16507 | 23.72814 |                                                |
| 2 | 24270542 | 24271339 | KD2-H4K8ac_peak_16508 | 12.36441 |                                                |
| 2 | 24271879 | 24272201 | KD2-H4K8ac_peak_16509 | 5.01002  | C2orf44_ENSG00000163026;FKBP1B_ENSG00000119782 |
| 2 | 24272617 | 24273056 | KD2-H4K8ac_peak_16510 | 9.26408  | C2orf44_ENSG00000163026;FKBP1B_ENSG00000119782 |
| 2 | 24299756 | 24300157 | KD2-H4K8ac_peak_16511 | 8.4716   | SF3B14_ENSG00000115128;FAM228B_ENSG00000219626 |
| 2 | 24306411 | 24306668 | KD2-H4K8ac_peak_16512 | 15.70138 |                                                |

|   |          |          |                       |          |                                                     |
|---|----------|----------|-----------------------|----------|-----------------------------------------------------|
| 2 | 24306935 | 24308236 | KD2-H4K8ac_peak_16513 | 14.27217 | TP53I3_ENSG00000115129                              |
| 2 | 24345601 | 24347041 | KD2-H4K8ac_peak_16514 | 16.29636 | PFN4_ENSG00000176732;RP11-507M3.1_ENSG00000266118   |
| 2 | 24582787 | 24584484 | KD2-H4K8ac_peak_16515 | 18.73085 | ITSN2_ENSG00000198399                               |
| 2 | 24713132 | 24714337 | KD2-H4K8ac_peak_16516 | 9.96798  | NCOA1_ENSG00000084676                               |
| 2 | 25015378 | 25016836 | KD2-H4K8ac_peak_16517 | 16.67374 | PTRHD1_ENSG00000184924;CENPO_ENSG00000138092        |
| 2 | 25142398 | 25142989 | KD2-H4K8ac_peak_16518 | 8.21852  | ADCY3_ENSG00000138031                               |
| 2 | 25151504 | 25151776 | KD2-H4K8ac_peak_16519 | 5.14125  |                                                     |
| 2 | 25193939 | 25195643 | KD2-H4K8ac_peak_16520 | 25.75599 | DNAJC27_ENSG00000115137;DNAJC27-AS1_ENSG00000224165 |
| 2 | 25207508 | 25207701 | KD2-H4K8ac_peak_16521 | 6.30626  |                                                     |
| 2 | 25237636 | 25237843 | KD2-H4K8ac_peak_16522 | 5.88845  |                                                     |
| 2 | 25265356 | 25265781 | KD2-H4K8ac_peak_16523 | 3.82059  | EFR3B_ENSG00000084710                               |
| 2 | 25424598 | 25425027 | KD2-H4K8ac_peak_16524 | 5.51783  |                                                     |
| 2 | 25474166 | 25475122 | KD2-H4K8ac_peak_16525 | 32.38585 |                                                     |
| 2 | 25475442 | 25476115 | KD2-H4K8ac_peak_16526 | 10.66719 |                                                     |
| 2 | 25480693 | 25480891 | KD2-H4K8ac_peak_16527 | 5.48743  |                                                     |
| 2 | 25508318 | 25508624 | KD2-H4K8ac_peak_16528 | 5.66705  |                                                     |
| 2 | 25512487 | 25512854 | KD2-H4K8ac_peak_16529 | 5.75757  |                                                     |
| 2 | 25513732 | 25514072 | KD2-H4K8ac_peak_16530 | 8.36432  |                                                     |
| 2 | 25514278 | 25515247 | KD2-H4K8ac_peak_16531 | 16.29636 |                                                     |
| 2 | 25516635 | 25517059 | KD2-H4K8ac_peak_16532 | 10.43145 |                                                     |
| 2 | 25517265 | 25518419 | KD2-H4K8ac_peak_16533 | 14.73375 |                                                     |
| 2 | 25533286 | 25533897 | KD2-H4K8ac_peak_16534 | 17.66411 |                                                     |
| 2 | 25534660 | 25535378 | KD2-H4K8ac_peak_16535 | 12.82393 |                                                     |
| 2 | 25536961 | 25538504 | KD2-H4K8ac_peak_16536 | 20.30085 |                                                     |
| 2 | 25558206 | 25558475 | KD2-H4K8ac_peak_16537 | 9.46843  |                                                     |
| 2 | 25563071 | 25564785 | KD2-H4K8ac_peak_16538 | 17.43561 | DNMT3A_ENSG00000119772                              |
| 2 | 25565070 | 25565836 | KD2-H4K8ac_peak_16539 | 19.25648 | DNMT3A_ENSG00000119772                              |
| 2 | 25584547 | 25584807 | KD2-H4K8ac_peak_16540 | 7.30812  |                                                     |
| 2 | 25599425 | 25600594 | KD2-H4K8ac_peak_16541 | 13.73635 | AC012074.2_ENSG00000235072                          |
| 2 | 25600791 | 25601301 | KD2-H4K8ac_peak_16542 | 5.76151  |                                                     |
| 2 | 25739584 | 25739787 | KD2-H4K8ac_peak_16543 | 9.66321  |                                                     |
| 2 | 25895639 | 25896391 | KD2-H4K8ac_peak_16544 | 19.55721 | DTNB_ENSG00000138101                                |
| 2 | 25896634 | 25897065 | KD2-H4K8ac_peak_16545 | 12.13241 | DTNB_ENSG00000138101                                |
| 2 | 25970944 | 25971147 | KD2-H4K8ac_peak_16546 | 3.87414  |                                                     |
| 2 | 26100817 | 26101112 | KD2-H4K8ac_peak_16547 | 9.19869  | ASXL2_ENSG00000143970                               |
| 2 | 26174447 | 26174666 | KD2-H4K8ac_peak_16548 | 10.53377 |                                                     |
| 2 | 26204696 | 26205341 | KD2-H4K8ac_peak_16549 | 9.67696  | KIF3C_ENSG00000084731                               |
| 2 | 26205658 | 26206234 | KD2-H4K8ac_peak_16550 | 13.22091 | KIF3C_ENSG00000084731                               |
| 2 | 26256144 | 26256633 | KD2-H4K8ac_peak_16551 | 13.70605 | RAB10_ENSG00000084733                               |
| 2 | 26257001 | 26257551 | KD2-H4K8ac_peak_16552 | 12.66412 | RAB10_ENSG00000084733                               |
| 2 | 26396043 | 26396458 | KD2-H4K8ac_peak_16553 | 14.68449 | GAREML_ENSG00000157833                              |
| 2 | 26401537 | 26402160 | KD2-H4K8ac_peak_16554 | 12.08081 |                                                     |
| 2 | 26467251 | 26468087 | KD2-H4K8ac_peak_16555 | 12.57865 | HADHA_ENSG00000084754                               |
| 2 | 26553195 | 26553535 | KD2-H4K8ac_peak_16556 | 9.16531  |                                                     |
| 2 | 26568253 | 26568613 | KD2-H4K8ac_peak_16557 | 13.30514 |                                                     |
| 2 | 26619282 | 26619615 | KD2-H4K8ac_peak_16558 | 5.23279  |                                                     |

|   |          |          |                       |          |                                                    |
|---|----------|----------|-----------------------|----------|----------------------------------------------------|
| 2 | 26624872 | 26625414 | KD2-H4K8ac_peak_16559 | 4.79789  | DRC1_ENSG00000157856                               |
| 2 | 26700349 | 26700927 | KD2-H4K8ac_peak_16560 | 6.30229  |                                                    |
| 2 | 26784947 | 26785766 | KD2-H4K8ac_peak_16561 | 14.68449 | C2orf70_ENSG00000173557                            |
| 2 | 26875671 | 26876380 | KD2-H4K8ac_peak_16562 | 14.80472 |                                                    |
| 2 | 26943338 | 26943729 | KD2-H4K8ac_peak_16563 | 6.94249  |                                                    |
| 2 | 26973035 | 26973639 | KD2-H4K8ac_peak_16564 | 7.7031   |                                                    |
| 2 | 26976072 | 26976266 | KD2-H4K8ac_peak_16565 | 7.19631  |                                                    |
| 2 | 26986343 | 26987609 | KD2-H4K8ac_peak_16566 | 18.33962 | SLC35F6_ENSG00000213699;CENPA_ENSG00000115163      |
| 2 | 27008992 | 27009376 | KD2-H4K8ac_peak_16567 | 15.19625 |                                                    |
| 2 | 27069429 | 27069796 | KD2-H4K8ac_peak_16568 | 10.72313 | DPYSL5_ENSG00000157851                             |
| 2 | 27070387 | 27070776 | KD2-H4K8ac_peak_16569 | 7.57336  | DPYSL5_ENSG00000157851                             |
| 2 | 27071005 | 27071836 | KD2-H4K8ac_peak_16570 | 12.48406 | DPYSL5_ENSG00000157851                             |
| 2 | 27072255 | 27073035 | KD2-H4K8ac_peak_16571 | 11.24702 |                                                    |
| 2 | 27134628 | 27135017 | KD2-H4K8ac_peak_16572 | 3.97079  |                                                    |
| 2 | 27194079 | 27194331 | KD2-H4K8ac_peak_16573 | 8.3771   | MAPRE3_ENSG00000084764                             |
| 2 | 27255373 | 27255629 | KD2-H4K8ac_peak_16574 | 7.44324  | TMEM214_ENSG00000119777                            |
| 2 | 27272349 | 27273110 | KD2-H4K8ac_peak_16575 | 13.21979 | AGBL5-AS1_ENSG00000231636                          |
| 2 | 27274178 | 27275289 | KD2-H4K8ac_peak_16576 | 20.5832  |                                                    |
| 2 | 27294127 | 27294503 | KD2-H4K8ac_peak_16577 | 10.78621 | OST4_ENSG00000228474                               |
| 2 | 27294720 | 27296034 | KD2-H4K8ac_peak_16578 | 19.72564 | OST4_ENSG00000228474                               |
| 2 | 27298344 | 27298592 | KD2-H4K8ac_peak_16579 | 7.92775  |                                                    |
| 2 | 27300056 | 27301007 | KD2-H4K8ac_peak_16580 | 10.7186  | EMILIN1_ENSG00000138080                            |
| 2 | 27301528 | 27302206 | KD2-H4K8ac_peak_16581 | 10.35678 | EMILIN1_ENSG00000138080                            |
| 2 | 27308437 | 27309396 | KD2-H4K8ac_peak_16582 | 13.95627 | KHK_ENSG00000138030                                |
| 2 | 27318681 | 27319256 | KD2-H4K8ac_peak_16583 | 14.63726 |                                                    |
| 2 | 27341305 | 27342564 | KD2-H4K8ac_peak_16584 | 19.92174 | CGREF1_ENSG00000138028                             |
| 2 | 27346074 | 27347223 | KD2-H4K8ac_peak_16585 | 13.22091 | ABHD1_ENSG00000143994                              |
| 2 | 27357773 | 27358381 | KD2-H4K8ac_peak_16586 | 19.54082 | PREB_ENSG00000138073                               |
| 2 | 27371619 | 27371955 | KD2-H4K8ac_peak_16587 | 5.54647  | TCF23_ENSG00000163792                              |
| 2 | 27434936 | 27435662 | KD2-H4K8ac_peak_16588 | 9.20193  | SLC5A6_ENSG00000138074;ATRAID_ENSG00000138085      |
| 2 | 27439807 | 27440095 | KD2-H4K8ac_peak_16589 | 4.7158   | CAD_ENSG00000084774                                |
| 2 | 27440389 | 27440772 | KD2-H4K8ac_peak_16590 | 8.80432  | CAD_ENSG00000084774                                |
| 2 | 27477810 | 27478208 | KD2-H4K8ac_peak_16591 | 7.76104  |                                                    |
| 2 | 27485541 | 27485833 | KD2-H4K8ac_peak_16592 | 5.30799  |                                                    |
| 2 | 27487304 | 27488031 | KD2-H4K8ac_peak_16593 | 14.43794 |                                                    |
| 2 | 27526106 | 27526299 | KD2-H4K8ac_peak_16594 | 9.1511   |                                                    |
| 2 | 27545203 | 27546320 | KD2-H4K8ac_peak_16595 | 12.93209 |                                                    |
| 2 | 27578962 | 27580662 | KD2-H4K8ac_peak_16596 | 20.02161 | GTF3C2_ENSG00000115207;AC074117.10_ENSG00000234072 |
| 2 | 27592809 | 27593109 | KD2-H4K8ac_peak_16597 | 6.40874  | EIF2B4_ENSG00000115211;SNX17_ENSG00000115234       |
| 2 | 27593512 | 27594017 | KD2-H4K8ac_peak_16598 | 14.99434 | EIF2B4_ENSG00000115211;SNX17_ENSG00000115234       |
| 2 | 27600896 | 27601093 | KD2-H4K8ac_peak_16599 | 5.8127   |                                                    |
| 2 | 27601519 | 27601833 | KD2-H4K8ac_peak_16600 | 5.30799  |                                                    |
| 2 | 27602843 | 27603602 | KD2-H4K8ac_peak_16601 | 14.30822 | ZNF513_ENSG00000163795                             |
| 2 | 27603843 | 27604419 | KD2-H4K8ac_peak_16602 | 10.54778 | ZNF513_ENSG00000163795                             |
| 2 | 27631941 | 27632385 | KD2-H4K8ac_peak_16603 | 7.54635  | PPM1G_ENSG00000115241                              |
| 2 | 27632664 | 27632921 | KD2-H4K8ac_peak_16604 | 14.80472 | PPM1G_ENSG00000115241                              |

|   |          |          |                       |          |                                                                                 |
|---|----------|----------|-----------------------|----------|---------------------------------------------------------------------------------|
| 2 | 27633243 | 27633610 | KD2-H4K8ac_peak_16605 | 7.07117  | PPM1G_ENSG00000115241                                                           |
| 2 | 27651089 | 27651360 | KD2-H4K8ac_peak_16606 | 12.70959 | NRBP1_ENSG00000115216                                                           |
| 2 | 27651562 | 27651865 | KD2-H4K8ac_peak_16607 | 15.05445 | NRBP1_ENSG00000115216                                                           |
| 2 | 27717369 | 27718485 | KD2-H4K8ac_peak_16608 | 11.50346 | FNDC4_ENSG00000115226                                                           |
| 2 | 27804952 | 27805684 | KD2-H4K8ac_peak_16609 | 7.92775  | AC074091.1_ENSG00000221531;ZNF512_ENSG00000243943;RP11-158I13.2_ENSG00000259080 |
| 2 | 27851347 | 27851961 | KD2-H4K8ac_peak_16610 | 11.50346 | GPN1_ENSG00000198522;CCDC121_ENSG00000176714                                    |
| 2 | 27886209 | 27887360 | KD2-H4K8ac_peak_16611 | 16.49944 | SUPT7L_ENSG00000119760;SLC4A1AP_ENSG00000163798                                 |
| 2 | 27937776 | 27938651 | KD2-H4K8ac_peak_16612 | 16.67374 | AC074091.13_ENSG00000205334                                                     |
| 2 | 27960686 | 27960909 | KD2-H4K8ac_peak_16613 | 5.4779   |                                                                                 |
| 2 | 27961113 | 27961807 | KD2-H4K8ac_peak_16614 | 18.97568 |                                                                                 |
| 2 | 27975358 | 27975578 | KD2-H4K8ac_peak_16615 | 5.91443  |                                                                                 |
| 2 | 27994632 | 27994874 | KD2-H4K8ac_peak_16616 | 10.78621 | MRPL33_ENSG00000243147                                                          |
| 2 | 28112861 | 28113088 | KD2-H4K8ac_peak_16617 | 7.74292  | BRE_ENSG00000158019;RBKS_ENSG00000171174                                        |
| 2 | 28113688 | 28114421 | KD2-H4K8ac_peak_16618 | 15.82362 | BRE_ENSG00000158019;RBKS_ENSG00000171174                                        |
| 2 | 28548329 | 28549214 | KD2-H4K8ac_peak_16619 | 8.90799  |                                                                                 |
| 2 | 28557173 | 28557693 | KD2-H4K8ac_peak_16620 | 9.34989  |                                                                                 |
| 2 | 28569764 | 28570190 | KD2-H4K8ac_peak_16621 | 8.16212  |                                                                                 |
| 2 | 28577999 | 28578405 | KD2-H4K8ac_peak_16622 | 8.16906  |                                                                                 |
| 2 | 28578650 | 28580158 | KD2-H4K8ac_peak_16623 | 20.76319 |                                                                                 |
| 2 | 28589201 | 28589965 | KD2-H4K8ac_peak_16624 | 5.59859  |                                                                                 |
| 2 | 28612930 | 28614052 | KD2-H4K8ac_peak_16625 | 19.54082 |                                                                                 |
| 2 | 28614926 | 28615564 | KD2-H4K8ac_peak_16626 | 11.24702 | FOSL2_ENSG00000075426                                                           |
| 2 | 28616260 | 28616453 | KD2-H4K8ac_peak_16627 | 4.20044  | FOSL2_ENSG00000075426                                                           |
| 2 | 28789305 | 28789691 | KD2-H4K8ac_peak_16628 | 14.63458 |                                                                                 |
| 2 | 28886338 | 28886732 | KD2-H4K8ac_peak_16629 | 6.30607  | AC074011.2_ENSG00000230730                                                      |
| 2 | 28887510 | 28887776 | KD2-H4K8ac_peak_16630 | 10.7186  | AC074011.2_ENSG00000230730                                                      |
| 2 | 28973582 | 28974544 | KD2-H4K8ac_peak_16631 | 15.82362 | PPP1CB_ENSG00000213639                                                          |
| 2 | 28974924 | 28975395 | KD2-H4K8ac_peak_16632 | 14.99434 | PPP1CB_ENSG00000213639                                                          |
| 2 | 29033725 | 29034152 | KD2-H4K8ac_peak_16633 | 11.05155 | RP11-713D19.1_ENSG00000273233                                                   |
| 2 | 29092757 | 29093031 | KD2-H4K8ac_peak_16634 | 7.70633  | TRMT61B_ENSG00000171103                                                         |
| 2 | 29093528 | 29094197 | KD2-H4K8ac_peak_16635 | 5.4779   | TRMT61B_ENSG00000171103                                                         |
| 2 | 29116914 | 29117227 | KD2-H4K8ac_peak_16636 | 12.82393 | WDR43_ENSG00000163811                                                           |
| 2 | 29117613 | 29118105 | KD2-H4K8ac_peak_16637 | 19.07436 | WDR43_ENSG00000163811                                                           |
| 2 | 29177809 | 29178387 | KD2-H4K8ac_peak_16638 | 7.87496  |                                                                                 |
| 2 | 29181823 | 29182136 | KD2-H4K8ac_peak_16639 | 8.10216  |                                                                                 |
| 2 | 29191309 | 29191508 | KD2-H4K8ac_peak_16640 | 4.42765  |                                                                                 |
| 2 | 29245559 | 29246050 | KD2-H4K8ac_peak_16641 | 4.56666  |                                                                                 |
| 2 | 29265071 | 29265342 | KD2-H4K8ac_peak_16642 | 8.10216  |                                                                                 |
| 2 | 29265600 | 29266427 | KD2-H4K8ac_peak_16643 | 8.6202   |                                                                                 |
| 2 | 29275928 | 29276438 | KD2-H4K8ac_peak_16644 | 15.58442 |                                                                                 |
| 2 | 29287736 | 29288716 | KD2-H4K8ac_peak_16645 | 6.84261  |                                                                                 |
| 2 | 29291575 | 29291978 | KD2-H4K8ac_peak_16646 | 5.13615  |                                                                                 |
| 2 | 29293369 | 29293721 | KD2-H4K8ac_peak_16647 | 5.9696   |                                                                                 |
| 2 | 29299175 | 29299440 | KD2-H4K8ac_peak_16648 | 5.54647  |                                                                                 |
| 2 | 29337728 | 29338953 | KD2-H4K8ac_peak_16649 | 33.10165 |                                                                                 |
| 2 | 29340262 | 29340474 | KD2-H4K8ac_peak_16650 | 7.24717  |                                                                                 |

|   |          |          |                       |          |
|---|----------|----------|-----------------------|----------|
| 2 | 29418390 | 29418589 | KD2-H4K8ac_peak_16651 | 7.45501  |
| 2 | 29420162 | 29420457 | KD2-H4K8ac_peak_16652 | 7.79558  |
| 2 | 29447382 | 29448484 | KD2-H4K8ac_peak_16653 | 4.84794  |
| 2 | 29471278 | 29471536 | KD2-H4K8ac_peak_16654 | 6.16     |
| 2 | 29471778 | 29473348 | KD2-H4K8ac_peak_16655 | 20.64015 |
| 2 | 29474018 | 29474922 | KD2-H4K8ac_peak_16656 | 8.85813  |
| 2 | 29483353 | 29483680 | KD2-H4K8ac_peak_16657 | 7.76104  |
| 2 | 29484000 | 29485400 | KD2-H4K8ac_peak_16658 | 14.95275 |
| 2 | 29486165 | 29488356 | KD2-H4K8ac_peak_16659 | 13.70605 |
| 2 | 29488587 | 29488887 | KD2-H4K8ac_peak_16660 | 9.00811  |
| 2 | 29489510 | 29490506 | KD2-H4K8ac_peak_16661 | 18.53991 |
| 2 | 29490990 | 29491845 | KD2-H4K8ac_peak_16662 | 7.0728   |
| 2 | 29492064 | 29492939 | KD2-H4K8ac_peak_16663 | 12.40345 |
| 2 | 29493227 | 29494115 | KD2-H4K8ac_peak_16664 | 10.05953 |
| 2 | 29494439 | 29494968 | KD2-H4K8ac_peak_16665 | 13.73635 |
| 2 | 29495215 | 29495418 | KD2-H4K8ac_peak_16666 | 4.9532   |
| 2 | 29495852 | 29496905 | KD2-H4K8ac_peak_16667 | 21.12734 |
| 2 | 29497301 | 29497855 | KD2-H4K8ac_peak_16668 | 9.63487  |
| 2 | 29498094 | 29498617 | KD2-H4K8ac_peak_16669 | 12.30509 |
| 2 | 29498896 | 29499456 | KD2-H4K8ac_peak_16670 | 6.65673  |
| 2 | 29504056 | 29504415 | KD2-H4K8ac_peak_16671 | 9.41741  |
| 2 | 29622360 | 29622665 | KD2-H4K8ac_peak_16672 | 6.84261  |
| 2 | 29623584 | 29623776 | KD2-H4K8ac_peak_16673 | 4.64799  |
| 2 | 29666265 | 29666501 | KD2-H4K8ac_peak_16674 | 4.67342  |
| 2 | 29697724 | 29697935 | KD2-H4K8ac_peak_16675 | 4.98072  |
| 2 | 29703789 | 29704079 | KD2-H4K8ac_peak_16676 | 10.19949 |
| 2 | 29720189 | 29720389 | KD2-H4K8ac_peak_16677 | 5.30799  |
| 2 | 29738751 | 29739602 | KD2-H4K8ac_peak_16678 | 16.71655 |
| 2 | 29739905 | 29740191 | KD2-H4K8ac_peak_16679 | 11.33751 |
| 2 | 29740675 | 29740873 | KD2-H4K8ac_peak_16680 | 6.84261  |
| 2 | 29741320 | 29741610 | KD2-H4K8ac_peak_16681 | 8.79106  |
| 2 | 29742032 | 29742292 | KD2-H4K8ac_peak_16682 | 5.5478   |
| 2 | 29742555 | 29742821 | KD2-H4K8ac_peak_16683 | 6.99825  |
| 2 | 29750298 | 29750842 | KD2-H4K8ac_peak_16684 | 10.19949 |
| 2 | 29751245 | 29752843 | KD2-H4K8ac_peak_16685 | 8.16906  |
| 2 | 29783459 | 29783662 | KD2-H4K8ac_peak_16686 | 9.30297  |
| 2 | 29784592 | 29785974 | KD2-H4K8ac_peak_16687 | 10.96455 |
| 2 | 29793380 | 29793639 | KD2-H4K8ac_peak_16688 | 7.90197  |
| 2 | 29797516 | 29797972 | KD2-H4K8ac_peak_16689 | 7.81472  |
| 2 | 29798582 | 29798880 | KD2-H4K8ac_peak_16690 | 6.22071  |
| 2 | 29801387 | 29802280 | KD2-H4K8ac_peak_16691 | 14.15383 |
| 2 | 29802595 | 29802839 | KD2-H4K8ac_peak_16692 | 5.73924  |
| 2 | 29803732 | 29804472 | KD2-H4K8ac_peak_16693 | 11.67741 |
| 2 | 29805957 | 29806165 | KD2-H4K8ac_peak_16694 | 7.41896  |
| 2 | 29811082 | 29811321 | KD2-H4K8ac_peak_16695 | 7.20116  |
| 2 | 29835419 | 29835695 | KD2-H4K8ac_peak_16696 | 9.20808  |

|   |          |          |                       |          |                                                      |
|---|----------|----------|-----------------------|----------|------------------------------------------------------|
| 2 | 29836979 | 29837271 | KD2-H4K8ac_peak_16697 | 7.30812  |                                                      |
| 2 | 29838812 | 29839170 | KD2-H4K8ac_peak_16698 | 11.83301 |                                                      |
| 2 | 29840351 | 29840572 | KD2-H4K8ac_peak_16699 | 4.2447   |                                                      |
| 2 | 30039141 | 30039442 | KD2-H4K8ac_peak_16700 | 5.21035  |                                                      |
| 2 | 30057667 | 30057955 | KD2-H4K8ac_peak_16701 | 4.42765  |                                                      |
| 2 | 30248131 | 30248353 | KD2-H4K8ac_peak_16702 | 6.15163  |                                                      |
| 2 | 30249211 | 30249857 | KD2-H4K8ac_peak_16703 | 15.42656 |                                                      |
| 2 | 30251715 | 30251910 | KD2-H4K8ac_peak_16704 | 6.42941  |                                                      |
| 2 | 30307868 | 30308100 | KD2-H4K8ac_peak_16705 | 8.17902  |                                                      |
| 2 | 30338123 | 30338390 | KD2-H4K8ac_peak_16706 | 9.07715  |                                                      |
| 2 | 30453482 | 30453763 | KD2-H4K8ac_peak_16707 | 4.74647  | LBH_ENSG00000213626                                  |
| 2 | 30524289 | 30524800 | KD2-H4K8ac_peak_16708 | 7.47462  |                                                      |
| 2 | 30645783 | 30645992 | KD2-H4K8ac_peak_16709 | 6.25869  |                                                      |
| 2 | 30669520 | 30670670 | KD2-H4K8ac_peak_16710 | 11.97691 | LCLAT1_ENSG00000172954                               |
| 2 | 30736906 | 30737168 | KD2-H4K8ac_peak_16711 | 4.44748  |                                                      |
| 2 | 30912294 | 30912701 | KD2-H4K8ac_peak_16712 | 5.9696   |                                                      |
| 2 | 30960229 | 30960495 | KD2-H4K8ac_peak_16713 | 7.61026  |                                                      |
| 2 | 30980036 | 30980323 | KD2-H4K8ac_peak_16714 | 6.04107  |                                                      |
| 2 | 30981265 | 30981555 | KD2-H4K8ac_peak_16715 | 7.42964  |                                                      |
| 2 | 31094594 | 31094954 | KD2-H4K8ac_peak_16716 | 9.36516  |                                                      |
| 2 | 31138392 | 31138655 | KD2-H4K8ac_peak_16717 | 4.01115  |                                                      |
| 2 | 31216669 | 31217072 | KD2-H4K8ac_peak_16718 | 9.08816  |                                                      |
| 2 | 31345041 | 31345233 | KD2-H4K8ac_peak_16719 | 4.01115  |                                                      |
| 2 | 31353077 | 31353320 | KD2-H4K8ac_peak_16720 | 5.14125  |                                                      |
| 2 | 31360217 | 31361797 | KD2-H4K8ac_peak_16721 | 12.93209 |                                                      |
| 2 | 31457301 | 31457808 | KD2-H4K8ac_peak_16722 | 8.28234  | CAPN14_ENSG00000214711;EHD3_ENSG00000013016          |
| 2 | 32234747 | 32235081 | KD2-H4K8ac_peak_16723 | 4.86324  |                                                      |
| 2 | 32235445 | 32235645 | KD2-H4K8ac_peak_16724 | 12.90757 | MEMO1_ENSG00000162959                                |
| 2 | 32235903 | 32236475 | KD2-H4K8ac_peak_16725 | 21.60954 | MEMO1_ENSG00000162959                                |
| 2 | 32264991 | 32265188 | KD2-H4K8ac_peak_16726 | 9.6247   | DPY30_ENSG00000162961                                |
| 2 | 32288789 | 32289191 | KD2-H4K8ac_peak_16727 | 10.74343 | SPAST_ENSG00000021574                                |
| 2 | 32390277 | 32390619 | KD2-H4K8ac_peak_16728 | 9.26408  | RP11-563N4.1_ENSG00000272716;SLC30A6_ENSG00000152683 |
| 2 | 32501737 | 32502026 | KD2-H4K8ac_peak_16729 | 5.9696   | YIPF4_ENSG00000119820                                |
| 2 | 32502220 | 32502664 | KD2-H4K8ac_peak_16730 | 11.89502 | YIPF4_ENSG00000119820                                |
| 2 | 32503009 | 32503358 | KD2-H4K8ac_peak_16731 | 10.7186  | YIPF4_ENSG00000119820                                |
| 2 | 32581489 | 32581947 | KD2-H4K8ac_peak_16732 | 18.33962 | BIRC6_ENSG00000115760                                |
| 2 | 32582352 | 32582647 | KD2-H4K8ac_peak_16733 | 10.43145 | BIRC6_ENSG00000115760                                |
| 2 | 32853257 | 32853586 | KD2-H4K8ac_peak_16734 | 6.40297  | TTC27_ENSG00000018699                                |
| 2 | 33063947 | 33064262 | KD2-H4K8ac_peak_16735 | 4.56666  |                                                      |
| 2 | 33824630 | 33824950 | KD2-H4K8ac_peak_16736 | 9.06369  | FAM98A_ENSG00000119812                               |
| 2 | 36824911 | 36825266 | KD2-H4K8ac_peak_16737 | 30.35433 |                                                      |
| 2 | 37193402 | 37193633 | KD2-H4K8ac_peak_16738 | 13.59098 | STRN_ENSG00000115808                                 |
| 2 | 37311720 | 37311927 | KD2-H4K8ac_peak_16739 | 7.47462  | HEATR5B_ENSG00000008869;GPATCH11_ENSG00000152133     |
| 2 | 37383891 | 37384792 | KD2-H4K8ac_peak_16740 | 11.7608  | EIF2AK2_ENSG00000055332                              |
| 2 | 37422991 | 37423411 | KD2-H4K8ac_peak_16741 | 8.85813  | SULT6B1_ENSG00000138068;CEBPZ-AS1_ENSG00000218739    |
| 2 | 37423638 | 37424131 | KD2-H4K8ac_peak_16742 | 8.4716   | SULT6B1_ENSG00000138068;CEBPZ-AS1_ENSG00000218739    |



|   |          |          |                       |          |                                                    |
|---|----------|----------|-----------------------|----------|----------------------------------------------------|
| 2 | 37457888 | 37458160 | KD2-H4K8ac_peak_16743 | 6.72624  | CEBPZ_ENSG00000115816;NDUF77_ENSG00000003509       |
| 2 | 37458395 | 37459145 | KD2-H4K8ac_peak_16744 | 12.13241 | CEBPZ_ENSG00000115816;NDUF77_ENSG00000003509       |
| 2 | 37551307 | 37551883 | KD2-H4K8ac_peak_16745 | 10.86378 | PRKD3_ENSG00000115825;AC007391.2_ENSG00000232028   |
| 2 | 37552104 | 37552599 | KD2-H4K8ac_peak_16746 | 8.47116  | PRKD3_ENSG00000115825;AC007391.2_ENSG00000232028   |
| 2 | 37781752 | 37782266 | KD2-H4K8ac_peak_16747 | 4.76709  |                                                    |
| 2 | 37787523 | 37788325 | KD2-H4K8ac_peak_16748 | 6.08655  |                                                    |
| 2 | 37868024 | 37868382 | KD2-H4K8ac_peak_16749 | 5.54647  |                                                    |
| 2 | 37894186 | 37894410 | KD2-H4K8ac_peak_16750 | 5.12715  |                                                    |
| 2 | 37898455 | 37900103 | KD2-H4K8ac_peak_16751 | 16.54484 |                                                    |
| 2 | 38082418 | 38083164 | KD2-H4K8ac_peak_16752 | 7.57336  |                                                    |
| 2 | 38083696 | 38084302 | KD2-H4K8ac_peak_16753 | 9.57101  |                                                    |
| 2 | 38151944 | 38153265 | KD2-H4K8ac_peak_16754 | 17.38513 |                                                    |
| 2 | 38153828 | 38154034 | KD2-H4K8ac_peak_16755 | 3.75035  |                                                    |
| 2 | 38157658 | 38157851 | KD2-H4K8ac_peak_16756 | 5.54647  |                                                    |
| 2 | 38302678 | 38304274 | KD2-H4K8ac_peak_16757 | 23.72665 | CYP1B1-AS1_ENSG00000232973                         |
| 2 | 38332777 | 38333086 | KD2-H4K8ac_peak_16758 | 5.59859  |                                                    |
| 2 | 38333559 | 38333907 | KD2-H4K8ac_peak_16759 | 6.35843  |                                                    |
| 2 | 38334841 | 38335047 | KD2-H4K8ac_peak_16760 | 5.30799  |                                                    |
| 2 | 38336352 | 38336579 | KD2-H4K8ac_peak_16761 | 6.27719  | CYP1B1_ENSG00000138061                             |
| 2 | 38343173 | 38343431 | KD2-H4K8ac_peak_16762 | 7.94441  |                                                    |
| 2 | 38346288 | 38346950 | KD2-H4K8ac_peak_16763 | 9.98013  |                                                    |
| 2 | 38441110 | 38441437 | KD2-H4K8ac_peak_16764 | 5.92967  |                                                    |
| 2 | 38446285 | 38446526 | KD2-H4K8ac_peak_16765 | 8.30974  |                                                    |
| 2 | 38603823 | 38604394 | KD2-H4K8ac_peak_16766 | 15.61313 | ATL2_ENSG00000119787                               |
| 2 | 38762781 | 38763698 | KD2-H4K8ac_peak_16767 | 24.67911 | RP11-541E12.1_ENSG00000271443                      |
| 2 | 38829160 | 38830032 | KD2-H4K8ac_peak_16768 | 26.37453 | AC011247.3_ENSG00000235586;HNRNPLL_ENSG00000143889 |
| 2 | 38892792 | 38892997 | KD2-H4K8ac_peak_16769 | 6.24114  | GALM_ENSG00000143891                               |
| 2 | 38977677 | 38978448 | KD2-H4K8ac_peak_16770 | 13.3695  | SRSF7_ENSG00000115875;GEMIN6_ENSG00000152147       |
| 2 | 38981961 | 38982159 | KD2-H4K8ac_peak_16771 | 5.14125  |                                                    |
| 2 | 39004732 | 39005147 | KD2-H4K8ac_peak_16772 | 12.57865 |                                                    |
| 2 | 39005549 | 39005851 | KD2-H4K8ac_peak_16773 | 5.92591  |                                                    |
| 2 | 39102717 | 39103002 | KD2-H4K8ac_peak_16774 | 10.43145 | DHX57_ENSG00000163214;MORN2_ENSG00000188010        |
| 2 | 39162819 | 39163033 | KD2-H4K8ac_peak_16775 | 7.27716  |                                                    |
| 2 | 39288560 | 39288759 | KD2-H4K8ac_peak_16776 | 6.40683  |                                                    |
| 2 | 39347689 | 39348572 | KD2-H4K8ac_peak_16777 | 15.58442 |                                                    |
| 2 | 39349136 | 39349377 | KD2-H4K8ac_peak_16778 | 6.13909  |                                                    |
| 2 | 39350900 | 39351431 | KD2-H4K8ac_peak_16779 | 11.92978 | SOS1_ENSG00000115904                               |
| 2 | 39351942 | 39352289 | KD2-H4K8ac_peak_16780 | 4.35724  | SOS1_ENSG00000115904                               |
| 2 | 39470730 | 39472117 | KD2-H4K8ac_peak_16781 | 12.66138 |                                                    |
| 2 | 39664068 | 39664354 | KD2-H4K8ac_peak_16782 | 19.33018 | MAP4K3_ENSG0000011566;AC007246.3_ENSG00000231312   |
| 2 | 39664637 | 39665334 | KD2-H4K8ac_peak_16783 | 6.40297  | MAP4K3_ENSG0000011566;AC007246.3_ENSG00000231312   |
| 2 | 39893079 | 39893615 | KD2-H4K8ac_peak_16784 | 13.12288 | TMEM178A_ENSG00000152154                           |
| 2 | 40005974 | 40006358 | KD2-H4K8ac_peak_16785 | 27.01413 | THUMPD2_ENSG00000138050                            |
| 2 | 40006559 | 40007038 | KD2-H4K8ac_peak_16786 | 8.58069  | THUMPD2_ENSG00000138050                            |
| 2 | 40558785 | 40559152 | KD2-H4K8ac_peak_16787 | 4.86324  |                                                    |
| 2 | 40658496 | 40659006 | KD2-H4K8ac_peak_16788 | 9.65086  |                                                    |

|   |          |          |                       |          |                                                 |
|---|----------|----------|-----------------------|----------|-------------------------------------------------|
| 2 | 40679100 | 40679556 | KD2-H4K8ac_peak_16789 | 13.50024 |                                                 |
| 2 | 41737228 | 41737476 | KD2-H4K8ac_peak_16790 | 3.96965  |                                                 |
| 2 | 42068216 | 42068673 | KD2-H4K8ac_peak_16791 | 17.53289 |                                                 |
| 2 | 42105240 | 42105473 | KD2-H4K8ac_peak_16792 | 6.30229  |                                                 |
| 2 | 42106752 | 42107014 | KD2-H4K8ac_peak_16793 | 5.01002  |                                                 |
| 2 | 42180731 | 42180954 | KD2-H4K8ac_peak_16794 | 5.9696   | C2orf91_ENSG00000205086                         |
| 2 | 42181228 | 42181480 | KD2-H4K8ac_peak_16795 | 4.67342  | C2orf91_ENSG00000205086                         |
| 2 | 42182001 | 42182994 | KD2-H4K8ac_peak_16796 | 20.26332 | C2orf91_ENSG00000205086                         |
| 2 | 42190348 | 42190604 | KD2-H4K8ac_peak_16797 | 5.3608   |                                                 |
| 2 | 42191373 | 42191577 | KD2-H4K8ac_peak_16798 | 5.405    |                                                 |
| 2 | 42193821 | 42194044 | KD2-H4K8ac_peak_16799 | 6.55628  |                                                 |
| 2 | 42273514 | 42273733 | KD2-H4K8ac_peak_16800 | 10.35678 |                                                 |
| 2 | 42273959 | 42274935 | KD2-H4K8ac_peak_16801 | 17.43561 | PKDCC_ENSG00000162878                           |
| 2 | 42275256 | 42275529 | KD2-H4K8ac_peak_16802 | 4.54006  | PKDCC_ENSG00000162878                           |
| 2 | 42343827 | 42344021 | KD2-H4K8ac_peak_16803 | 3.89905  |                                                 |
| 2 | 42345139 | 42345650 | KD2-H4K8ac_peak_16804 | 10.86378 |                                                 |
| 2 | 42353023 | 42353286 | KD2-H4K8ac_peak_16805 | 6.40297  |                                                 |
| 2 | 42355332 | 42355603 | KD2-H4K8ac_peak_16806 | 6.92611  |                                                 |
| 2 | 42356523 | 42356892 | KD2-H4K8ac_peak_16807 | 5.405    |                                                 |
| 2 | 42359257 | 42359695 | KD2-H4K8ac_peak_16808 | 8.86099  |                                                 |
| 2 | 42360466 | 42361505 | KD2-H4K8ac_peak_16809 | 19.77698 |                                                 |
| 2 | 42363560 | 42363774 | KD2-H4K8ac_peak_16810 | 6.25869  |                                                 |
| 2 | 42364119 | 42364695 | KD2-H4K8ac_peak_16811 | 8.18929  |                                                 |
| 2 | 42365449 | 42365820 | KD2-H4K8ac_peak_16812 | 4.86324  |                                                 |
| 2 | 42367840 | 42369137 | KD2-H4K8ac_peak_16813 | 12.36441 |                                                 |
| 2 | 42369992 | 42370364 | KD2-H4K8ac_peak_16814 | 12.53053 |                                                 |
| 2 | 42371072 | 42371426 | KD2-H4K8ac_peak_16815 | 6.36375  |                                                 |
| 2 | 42374562 | 42374836 | KD2-H4K8ac_peak_16816 | 7.1181   |                                                 |
| 2 | 42395979 | 42396295 | KD2-H4K8ac_peak_16817 | 5.78173  | EML4_ENSG00000143924                            |
| 2 | 42396566 | 42396832 | KD2-H4K8ac_peak_16818 | 8.3261   | AC083949.1_ENSG00000224875;EML4_ENSG00000143924 |
| 2 | 42400685 | 42400898 | KD2-H4K8ac_peak_16819 | 4.70206  |                                                 |
| 2 | 42587904 | 42588616 | KD2-H4K8ac_peak_16820 | 10.19949 |                                                 |
| 2 | 42588875 | 42589072 | KD2-H4K8ac_peak_16821 | 9.90914  |                                                 |
| 2 | 42595966 | 42596326 | KD2-H4K8ac_peak_16822 | 6.0073   |                                                 |
| 2 | 42596553 | 42596800 | KD2-H4K8ac_peak_16823 | 8.26945  |                                                 |
| 2 | 42598830 | 42599349 | KD2-H4K8ac_peak_16824 | 11.50346 |                                                 |
| 2 | 42603540 | 42603748 | KD2-H4K8ac_peak_16825 | 9.95119  |                                                 |
| 2 | 42720495 | 42722009 | KD2-H4K8ac_peak_16826 | 11.32417 | KCNG3_ENSG00000171126;MTA3_ENSG00000057935      |
| 2 | 42737121 | 42737643 | KD2-H4K8ac_peak_16827 | 8.6475   |                                                 |
| 2 | 42795197 | 42795544 | KD2-H4K8ac_peak_16828 | 8.63033  |                                                 |
| 2 | 42795831 | 42796674 | KD2-H4K8ac_peak_16829 | 23.36419 |                                                 |
| 2 | 42831114 | 42831346 | KD2-H4K8ac_peak_16830 | 5.28072  |                                                 |
| 2 | 42917987 | 42918214 | KD2-H4K8ac_peak_16831 | 5.57044  |                                                 |
| 2 | 43012746 | 43012953 | KD2-H4K8ac_peak_16832 | 5.72327  |                                                 |
| 2 | 43037008 | 43037564 | KD2-H4K8ac_peak_16833 | 26.00609 |                                                 |
| 2 | 43037875 | 43039460 | KD2-H4K8ac_peak_16834 | 34.25782 |                                                 |

|   |          |          |                       |          |                            |
|---|----------|----------|-----------------------|----------|----------------------------|
| 2 | 43055039 | 43055498 | KD2-H4K8ac_peak_16835 | 5.4779   | AC098824.6_ENSG00000232202 |
| 2 | 43082724 | 43082959 | KD2-H4K8ac_peak_16836 | 4.211    |                            |
| 2 | 43084217 | 43084469 | KD2-H4K8ac_peak_16837 | 8.10216  |                            |
| 2 | 43085435 | 43085714 | KD2-H4K8ac_peak_16838 | 11.48808 |                            |
| 2 | 43132649 | 43134616 | KD2-H4K8ac_peak_16839 | 12.70959 |                            |
| 2 | 43152082 | 43152320 | KD2-H4K8ac_peak_16840 | 7.07117  |                            |
| 2 | 43153013 | 43153271 | KD2-H4K8ac_peak_16841 | 8.86099  |                            |
| 2 | 43154082 | 43154491 | KD2-H4K8ac_peak_16842 | 6.40808  |                            |
| 2 | 43154697 | 43155086 | KD2-H4K8ac_peak_16843 | 8.10216  |                            |
| 2 | 43156956 | 43157225 | KD2-H4K8ac_peak_16844 | 4.44527  |                            |
| 2 | 43194582 | 43195234 | KD2-H4K8ac_peak_16845 | 4.73897  |                            |
| 2 | 43202051 | 43202778 | KD2-H4K8ac_peak_16846 | 13.27022 |                            |
| 2 | 43227764 | 43228086 | KD2-H4K8ac_peak_16847 | 4.37815  |                            |
| 2 | 43251404 | 43251735 | KD2-H4K8ac_peak_16848 | 10.84242 |                            |
| 2 | 43268396 | 43268694 | KD2-H4K8ac_peak_16849 | 8.73935  |                            |
| 2 | 43269278 | 43269494 | KD2-H4K8ac_peak_16850 | 5.75757  |                            |
| 2 | 43273428 | 43273726 | KD2-H4K8ac_peak_16851 | 4.44527  |                            |
| 2 | 43294798 | 43295550 | KD2-H4K8ac_peak_16852 | 7.92775  |                            |
| 2 | 43307762 | 43308211 | KD2-H4K8ac_peak_16853 | 10.19949 |                            |
| 2 | 43309077 | 43309707 | KD2-H4K8ac_peak_16854 | 18.37277 |                            |
| 2 | 43309934 | 43310797 | KD2-H4K8ac_peak_16855 | 17.30994 |                            |
| 2 | 43312436 | 43312702 | KD2-H4K8ac_peak_16856 | 4.28801  |                            |
| 2 | 43367471 | 43367663 | KD2-H4K8ac_peak_16857 | 4.67342  |                            |
| 2 | 43382998 | 43383277 | KD2-H4K8ac_peak_16858 | 6.60096  |                            |
| 2 | 43395184 | 43395416 | KD2-H4K8ac_peak_16859 | 5.48272  |                            |
| 2 | 43395627 | 43396000 | KD2-H4K8ac_peak_16860 | 5.01002  |                            |
| 2 | 43437259 | 43437526 | KD2-H4K8ac_peak_16861 | 4.54006  |                            |
| 2 | 43444800 | 43445307 | KD2-H4K8ac_peak_16862 | 8.86099  |                            |
| 2 | 43445533 | 43446003 | KD2-H4K8ac_peak_16863 | 6.84261  |                            |
| 2 | 43446819 | 43447516 | KD2-H4K8ac_peak_16864 | 12.53675 |                            |
| 2 | 43447938 | 43448346 | KD2-H4K8ac_peak_16865 | 6.20038  |                            |
| 2 | 43452642 | 43453753 | KD2-H4K8ac_peak_16866 | 12.10046 | ZFP36L2_ENSG00000152518    |
| 2 | 43454006 | 43454907 | KD2-H4K8ac_peak_16867 | 20.10577 | ZFP36L2_ENSG00000152518    |
| 2 | 43476459 | 43476724 | KD2-H4K8ac_peak_16868 | 4.06758  |                            |
| 2 | 43478712 | 43479355 | KD2-H4K8ac_peak_16869 | 6.66359  |                            |
| 2 | 43494358 | 43494670 | KD2-H4K8ac_peak_16870 | 5.15342  |                            |
| 2 | 43495608 | 43496705 | KD2-H4K8ac_peak_16871 | 11.24702 |                            |
| 2 | 43503897 | 43504428 | KD2-H4K8ac_peak_16872 | 4.08993  |                            |
| 2 | 43505221 | 43505604 | KD2-H4K8ac_peak_16873 | 4.3437   |                            |
| 2 | 43540086 | 43540423 | KD2-H4K8ac_peak_16874 | 4.57371  |                            |
| 2 | 43540676 | 43541094 | KD2-H4K8ac_peak_16875 | 10.05606 |                            |
| 2 | 43546218 | 43546426 | KD2-H4K8ac_peak_16876 | 6.99815  |                            |
| 2 | 43555758 | 43555956 | KD2-H4K8ac_peak_16877 | 6.25869  |                            |
| 2 | 43572824 | 43573276 | KD2-H4K8ac_peak_16878 | 6.25225  |                            |
| 2 | 43573474 | 43573992 | KD2-H4K8ac_peak_16879 | 12.69561 |                            |
| 2 | 43576085 | 43576499 | KD2-H4K8ac_peak_16880 | 10.53377 |                            |

|   |          |          |                       |          |                                               |
|---|----------|----------|-----------------------|----------|-----------------------------------------------|
| 2 | 43620576 | 43620795 | KD2-H4K8ac_peak_16881 | 6.25869  |                                               |
| 2 | 43748401 | 43748788 | KD2-H4K8ac_peak_16882 | 6.25869  |                                               |
| 2 | 43822606 | 43823126 | KD2-H4K8ac_peak_16883 | 6.84261  | THADA_ENSG00000115970                         |
| 2 | 43823373 | 43823719 | KD2-H4K8ac_peak_16884 | 16.95399 | THADA_ENSG00000115970                         |
| 2 | 43864536 | 43864801 | KD2-H4K8ac_peak_16885 | 5.38581  | PLEKHH2_ENSG00000152527                       |
| 2 | 44001246 | 44001502 | KD2-H4K8ac_peak_16886 | 9.95119  | DYNC2L1I_ENSG00000138036                      |
| 2 | 44059144 | 44059430 | KD2-H4K8ac_peak_16887 | 5.88845  |                                               |
| 2 | 44222712 | 44223091 | KD2-H4K8ac_peak_16888 | 11.04256 | LRPPRC_ENSG00000138095                        |
| 2 | 44223621 | 44224379 | KD2-H4K8ac_peak_16889 | 14.275   | LRPPRC_ENSG00000138095                        |
| 2 | 44271575 | 44271810 | KD2-H4K8ac_peak_16890 | 16.57619 |                                               |
| 2 | 44314262 | 44314472 | KD2-H4K8ac_peak_16891 | 10.43145 |                                               |
| 2 | 44314769 | 44315138 | KD2-H4K8ac_peak_16892 | 7.36799  |                                               |
| 2 | 44394546 | 44394912 | KD2-H4K8ac_peak_16893 | 11.28831 | PPM1B_ENSG00000138032                         |
| 2 | 44588500 | 44588924 | KD2-H4K8ac_peak_16894 | 7.76329  | PREPL_ENSG00000138078;CAMKMT_ENSG00000143919  |
| 2 | 44589131 | 44589683 | KD2-H4K8ac_peak_16895 | 8.55271  | PREPL_ENSG00000138078;CAMKMT_ENSG00000143919  |
| 2 | 44906540 | 44906841 | KD2-H4K8ac_peak_16896 | 4.91516  |                                               |
| 2 | 44907880 | 44908073 | KD2-H4K8ac_peak_16897 | 6.62457  |                                               |
| 2 | 44932311 | 44932673 | KD2-H4K8ac_peak_16898 | 7.40314  |                                               |
| 2 | 44933082 | 44933805 | KD2-H4K8ac_peak_16899 | 9.36516  |                                               |
| 2 | 44935817 | 44936088 | KD2-H4K8ac_peak_16900 | 6.99815  |                                               |
| 2 | 44941850 | 44942197 | KD2-H4K8ac_peak_16901 | 3.86308  |                                               |
| 2 | 44995616 | 44995924 | KD2-H4K8ac_peak_16902 | 8.4716   |                                               |
| 2 | 44999280 | 44999525 | KD2-H4K8ac_peak_16903 | 14.56272 |                                               |
| 2 | 45160746 | 45160946 | KD2-H4K8ac_peak_16904 | 6.27245  |                                               |
| 2 | 45161358 | 45163523 | KD2-H4K8ac_peak_16905 | 15.58442 |                                               |
| 2 | 45164527 | 45164821 | KD2-H4K8ac_peak_16906 | 7.18615  |                                               |
| 2 | 45165480 | 45166575 | KD2-H4K8ac_peak_16907 | 8.58725  | RP11-89K21.1_ENSG00000259439                  |
| 2 | 45167832 | 45168526 | KD2-H4K8ac_peak_16908 | 17.42905 | SIX3-AS1_ENSG00000236502;SIX3_ENSG00000138083 |
| 2 | 45169230 | 45170576 | KD2-H4K8ac_peak_16909 | 13.35993 | SIX3-AS1_ENSG00000236502;SIX3_ENSG00000138083 |
| 2 | 45170970 | 45171314 | KD2-H4K8ac_peak_16910 | 12.08081 |                                               |
| 2 | 45178965 | 45179371 | KD2-H4K8ac_peak_16911 | 5.63142  |                                               |
| 2 | 45237293 | 45237684 | KD2-H4K8ac_peak_16912 | 5.78173  | SIX2_ENSG00000170577                          |
| 2 | 45240835 | 45241568 | KD2-H4K8ac_peak_16913 | 17.67328 | AC093702.1_ENSG00000231156                    |
| 2 | 45396288 | 45397439 | KD2-H4K8ac_peak_16914 | 20.18584 | AC009236.2_ENSG00000231054                    |
| 2 | 45417487 | 45418102 | KD2-H4K8ac_peak_16915 | 8.4716   |                                               |
| 2 | 45451793 | 45452114 | KD2-H4K8ac_peak_16916 | 5.88845  |                                               |
| 2 | 45483979 | 45484185 | KD2-H4K8ac_peak_16917 | 5.01002  |                                               |
| 2 | 45484470 | 45484710 | KD2-H4K8ac_peak_16918 | 9.30599  |                                               |
| 2 | 45794473 | 45794713 | KD2-H4K8ac_peak_16919 | 8.82427  |                                               |
| 2 | 45837937 | 45838278 | KD2-H4K8ac_peak_16920 | 7.28827  |                                               |
| 2 | 45838701 | 45839162 | KD2-H4K8ac_peak_16921 | 5.72327  | SRBD1_ENSG00000068784                         |
| 2 | 45870489 | 45870948 | KD2-H4K8ac_peak_16922 | 10.35678 |                                               |
| 2 | 45877758 | 45878607 | KD2-H4K8ac_peak_16923 | 7.07117  | PRKCE_ENSG00000171132                         |
| 2 | 45878883 | 45879200 | KD2-H4K8ac_peak_16924 | 9.03583  | PRKCE_ENSG00000171132                         |
| 2 | 45879424 | 45879624 | KD2-H4K8ac_peak_16925 | 5.01002  | PRKCE_ENSG00000171132                         |
| 2 | 45976061 | 45976433 | KD2-H4K8ac_peak_16926 | 5.07021  |                                               |

|   |          |          |                       |          |                                               |
|---|----------|----------|-----------------------|----------|-----------------------------------------------|
| 2 | 45998237 | 45998669 | KD2-H4K8ac_peak_16927 | 6.2781   |                                               |
| 2 | 46010440 | 46011033 | KD2-H4K8ac_peak_16928 | 7.54952  |                                               |
| 2 | 46013815 | 46014532 | KD2-H4K8ac_peak_16929 | 7.47462  |                                               |
| 2 | 46039639 | 46039852 | KD2-H4K8ac_peak_16930 | 4.42765  |                                               |
| 2 | 46110347 | 46111005 | KD2-H4K8ac_peak_16931 | 11.90231 |                                               |
| 2 | 46463017 | 46463604 | KD2-H4K8ac_peak_16932 | 17.55491 |                                               |
| 2 | 46465092 | 46465302 | KD2-H4K8ac_peak_16933 | 8.55271  |                                               |
| 2 | 46523939 | 46524331 | KD2-H4K8ac_peak_16934 | 7.11824  |                                               |
| 2 | 46534571 | 46534780 | KD2-H4K8ac_peak_16935 | 5.20908  |                                               |
| 2 | 46541475 | 46541681 | KD2-H4K8ac_peak_16936 | 6.36375  |                                               |
| 2 | 46542347 | 46542626 | KD2-H4K8ac_peak_16937 | 6.13909  |                                               |
| 2 | 46546726 | 46547012 | KD2-H4K8ac_peak_16938 | 6.85193  |                                               |
| 2 | 46554903 | 46555371 | KD2-H4K8ac_peak_16939 | 3.97079  |                                               |
| 2 | 46556657 | 46558134 | KD2-H4K8ac_peak_16940 | 10.40376 |                                               |
| 2 | 46558825 | 46559362 | KD2-H4K8ac_peak_16941 | 12.36528 |                                               |
| 2 | 46559712 | 46560111 | KD2-H4K8ac_peak_16942 | 7.92775  |                                               |
| 2 | 46561202 | 46561742 | KD2-H4K8ac_peak_16943 | 11.24702 |                                               |
| 2 | 46562927 | 46563867 | KD2-H4K8ac_peak_16944 | 5.59859  |                                               |
| 2 | 46564393 | 46564643 | KD2-H4K8ac_peak_16945 | 4.54006  |                                               |
| 2 | 46565495 | 46566031 | KD2-H4K8ac_peak_16946 | 11.50346 |                                               |
| 2 | 46566783 | 46567107 | KD2-H4K8ac_peak_16947 | 10.43145 |                                               |
| 2 | 46567738 | 46568201 | KD2-H4K8ac_peak_16948 | 10.54778 |                                               |
| 2 | 46569033 | 46569336 | KD2-H4K8ac_peak_16949 | 11.03268 |                                               |
| 2 | 46604248 | 46604515 | KD2-H4K8ac_peak_16950 | 4.44527  |                                               |
| 2 | 46604861 | 46605247 | KD2-H4K8ac_peak_16951 | 7.29931  |                                               |
| 2 | 46687353 | 46687558 | KD2-H4K8ac_peak_16952 | 7.07117  |                                               |
| 2 | 46727188 | 46727401 | KD2-H4K8ac_peak_16953 | 7.22919  | RP11-417F21.2_ENSG00000253515                 |
| 2 | 46768958 | 46769709 | KD2-H4K8ac_peak_16954 | 12.13241 | ATP6V1E2_ENSG00000250565;RHOQ_ENSG00000119729 |
| 2 | 46770737 | 46771021 | KD2-H4K8ac_peak_16955 | 4.67342  |                                               |
| 2 | 46843666 | 46844144 | KD2-H4K8ac_peak_16956 | 14.17488 | PIGF_ENSG00000151665;CRIPT_ENSG00000119878    |
| 2 | 46925019 | 46925858 | KD2-H4K8ac_peak_16957 | 8.16906  | SOCS5_ENSG00000171150                         |
| 2 | 46926436 | 46926821 | KD2-H4K8ac_peak_16958 | 21.12734 | SOCS5_ENSG00000171150                         |
| 2 | 47073831 | 47074354 | KD2-H4K8ac_peak_16959 | 16.49944 |                                               |
| 2 | 47074696 | 47075297 | KD2-H4K8ac_peak_16960 | 5.72657  |                                               |
| 2 | 47075618 | 47076040 | KD2-H4K8ac_peak_16961 | 4.84206  |                                               |
| 2 | 47076989 | 47077375 | KD2-H4K8ac_peak_16962 | 9.34195  |                                               |
| 2 | 47101257 | 47101539 | KD2-H4K8ac_peak_16963 | 4.54006  |                                               |
| 2 | 47142353 | 47142887 | KD2-H4K8ac_peak_16964 | 18.33962 | TTC7A_ENSG00000068724                         |
| 2 | 47143088 | 47143824 | KD2-H4K8ac_peak_16965 | 9.95119  | TTC7A_ENSG00000068724                         |
| 2 | 47167826 | 47168225 | KD2-H4K8ac_peak_16966 | 16.33377 | MCFD2_ENSG00000180398                         |
| 2 | 47168509 | 47168931 | KD2-H4K8ac_peak_16967 | 6.8713   | MCFD2_ENSG00000180398                         |
| 2 | 47210378 | 47210869 | KD2-H4K8ac_peak_16968 | 7.76674  |                                               |
| 2 | 47213665 | 47214173 | KD2-H4K8ac_peak_16969 | 15.58442 |                                               |
| 2 | 47214405 | 47214647 | KD2-H4K8ac_peak_16970 | 5.4779   |                                               |
| 2 | 47215046 | 47215263 | KD2-H4K8ac_peak_16971 | 10.7186  |                                               |
| 2 | 47215849 | 47216068 | KD2-H4K8ac_peak_16972 | 8.5333   |                                               |

|   |          |          |                       |          |                                                    |
|---|----------|----------|-----------------------|----------|----------------------------------------------------|
| 2 | 47216534 | 47216752 | KD2-H4K8ac_peak_16973 | 8.85813  |                                                    |
| 2 | 47223802 | 47224037 | KD2-H4K8ac_peak_16974 | 4.37809  |                                                    |
| 2 | 47225185 | 47225400 | KD2-H4K8ac_peak_16975 | 3.63069  |                                                    |
| 2 | 47227455 | 47229815 | KD2-H4K8ac_peak_16976 | 10.35678 |                                                    |
| 2 | 47230187 | 47231422 | KD2-H4K8ac_peak_16977 | 20.67053 |                                                    |
| 2 | 47235085 | 47236706 | KD2-H4K8ac_peak_16978 | 13.65567 |                                                    |
| 2 | 47254210 | 47254522 | KD2-H4K8ac_peak_16979 | 5.88127  |                                                    |
| 2 | 47254764 | 47254959 | KD2-H4K8ac_peak_16980 | 7.90806  |                                                    |
| 2 | 47258786 | 47259784 | KD2-H4K8ac_peak_16981 | 11.28765 |                                                    |
| 2 | 47260371 | 47262013 | KD2-H4K8ac_peak_16982 | 20.78173 |                                                    |
| 2 | 47267482 | 47268179 | KD2-H4K8ac_peak_16983 | 15.2334  | AC093732.1_ENSG00000233845                         |
| 2 | 47268467 | 47268825 | KD2-H4K8ac_peak_16984 | 8.78814  | AC093732.1_ENSG00000233845                         |
| 2 | 47269962 | 47270408 | KD2-H4K8ac_peak_16985 | 12.13241 |                                                    |
| 2 | 47270649 | 47271308 | KD2-H4K8ac_peak_16986 | 11.55163 |                                                    |
| 2 | 47276847 | 47277296 | KD2-H4K8ac_peak_16987 | 4.78037  |                                                    |
| 2 | 47282146 | 47284378 | KD2-H4K8ac_peak_16988 | 22.03039 |                                                    |
| 2 | 47284599 | 47286070 | KD2-H4K8ac_peak_16989 | 16.22559 |                                                    |
| 2 | 47286432 | 47287052 | KD2-H4K8ac_peak_16990 | 5.01002  |                                                    |
| 2 | 47287972 | 47288746 | KD2-H4K8ac_peak_16991 | 6.66359  |                                                    |
| 2 | 47288973 | 47289388 | KD2-H4K8ac_peak_16992 | 14.99434 |                                                    |
| 2 | 47290181 | 47290451 | KD2-H4K8ac_peak_16993 | 8.388    |                                                    |
| 2 | 47290754 | 47291864 | KD2-H4K8ac_peak_16994 | 30.11673 |                                                    |
| 2 | 47295109 | 47295444 | KD2-H4K8ac_peak_16995 | 6.59919  | AC073283.7_ENSG00000225187                         |
| 2 | 47296213 | 47296923 | KD2-H4K8ac_peak_16996 | 4.91674  |                                                    |
| 2 | 47297281 | 47297803 | KD2-H4K8ac_peak_16997 | 8.94905  |                                                    |
| 2 | 47298265 | 47298603 | KD2-H4K8ac_peak_16998 | 6.67538  |                                                    |
| 2 | 47298938 | 47299885 | KD2-H4K8ac_peak_16999 | 9.11891  |                                                    |
| 2 | 47300161 | 47300705 | KD2-H4K8ac_peak_17000 | 6.40297  |                                                    |
| 2 | 47302857 | 47303054 | KD2-H4K8ac_peak_17001 | 4.69702  |                                                    |
| 2 | 47306817 | 47307264 | KD2-H4K8ac_peak_17002 | 13.12288 |                                                    |
| 2 | 47309991 | 47310326 | KD2-H4K8ac_peak_17003 | 9.54616  |                                                    |
| 2 | 47310551 | 47311750 | KD2-H4K8ac_peak_17004 | 17.67328 |                                                    |
| 2 | 47312972 | 47313665 | KD2-H4K8ac_peak_17005 | 27.25041 |                                                    |
| 2 | 47314218 | 47315690 | KD2-H4K8ac_peak_17006 | 26.40805 |                                                    |
| 2 | 47315999 | 47317375 | KD2-H4K8ac_peak_17007 | 24.80313 |                                                    |
| 2 | 47317641 | 47317878 | KD2-H4K8ac_peak_17008 | 13.73635 |                                                    |
| 2 | 47322470 | 47322662 | KD2-H4K8ac_peak_17009 | 6.67092  |                                                    |
| 2 | 47402965 | 47403536 | KD2-H4K8ac_peak_17010 | 13.95627 | RP11-761B3.1_ENSG00000273269;CALM2_ENSG00000143933 |
| 2 | 47403748 | 47404666 | KD2-H4K8ac_peak_17011 | 8.58725  | RP11-761B3.1_ENSG00000273269;CALM2_ENSG00000143933 |
| 2 | 47419701 | 47420064 | KD2-H4K8ac_peak_17012 | 6.65673  |                                                    |
| 2 | 47432123 | 47432599 | KD2-H4K8ac_peak_17013 | 8.28234  |                                                    |
| 2 | 47463944 | 47464688 | KD2-H4K8ac_peak_17014 | 10.40889 |                                                    |
| 2 | 47465910 | 47466157 | KD2-H4K8ac_peak_17015 | 8.11222  |                                                    |
| 2 | 47466644 | 47467569 | KD2-H4K8ac_peak_17016 | 12.10889 |                                                    |
| 2 | 47470454 | 47471106 | KD2-H4K8ac_peak_17017 | 11.50346 |                                                    |
| 2 | 47471311 | 47471674 | KD2-H4K8ac_peak_17018 | 10.53377 |                                                    |

|   |          |          |                       |          |                                                       |
|---|----------|----------|-----------------------|----------|-------------------------------------------------------|
| 2 | 47491430 | 47492440 | KD2-H4K8ac_peak_17019 | 12.30509 |                                                       |
| 2 | 47492638 | 47492938 | KD2-H4K8ac_peak_17020 | 7.36799  |                                                       |
| 2 | 47501770 | 47501976 | KD2-H4K8ac_peak_17021 | 10.24494 |                                                       |
| 2 | 47510539 | 47510945 | KD2-H4K8ac_peak_17022 | 9.91109  |                                                       |
| 2 | 47529590 | 47530063 | KD2-H4K8ac_peak_17023 | 8.33304  |                                                       |
| 2 | 47537221 | 47537577 | KD2-H4K8ac_peak_17024 | 11.00004 |                                                       |
| 2 | 47538321 | 47538877 | KD2-H4K8ac_peak_17025 | 11.03268 |                                                       |
| 2 | 47546537 | 47547012 | KD2-H4K8ac_peak_17026 | 6.99815  |                                                       |
| 2 | 47571527 | 47571811 | KD2-H4K8ac_peak_17027 | 7.76329  | AC073283.4_ENSG00000234690;EPCAM_ENSG00000119888      |
| 2 | 47572791 | 47573220 | KD2-H4K8ac_peak_17028 | 4.13134  | AC073283.4_ENSG00000234690;EPCAM_ENSG00000119888      |
| 2 | 47596156 | 47596959 | KD2-H4K8ac_peak_17029 | 12.96152 |                                                       |
| 2 | 47629337 | 47629546 | KD2-H4K8ac_peak_17030 | 6.90231  | MSH2_ENSG00000095002                                  |
| 2 | 47629817 | 47630017 | KD2-H4K8ac_peak_17031 | 7.25989  | MSH2_ENSG00000095002                                  |
| 2 | 47630344 | 47630634 | KD2-H4K8ac_peak_17032 | 13.52195 | MSH2_ENSG00000095002                                  |
| 2 | 47747678 | 47748882 | KD2-H4K8ac_peak_17033 | 16.14659 |                                                       |
| 2 | 47994956 | 47995166 | KD2-H4K8ac_peak_17034 | 7.49599  |                                                       |
| 2 | 48009324 | 48010115 | KD2-H4K8ac_peak_17035 | 22.12955 | RNU6-688P_ENSG00000251872                             |
| 2 | 48010378 | 48010617 | KD2-H4K8ac_peak_17036 | 5.94405  |                                                       |
| 2 | 48132154 | 48132799 | KD2-H4K8ac_peak_17037 | 10.19949 | FBXO11_ENSG00000138081;AC079807.2_ENSG00000233230     |
| 2 | 48133029 | 48133608 | KD2-H4K8ac_peak_17038 | 12.42761 | FBXO11_ENSG00000138081;AC079807.2_ENSG00000233230     |
| 2 | 48333188 | 48333454 | KD2-H4K8ac_peak_17039 | 8.33649  |                                                       |
| 2 | 48338667 | 48339796 | KD2-H4K8ac_peak_17040 | 17.43561 |                                                       |
| 2 | 48541968 | 48542590 | KD2-H4K8ac_peak_17041 | 9.01262  | FOXN2_ENSG00000170802                                 |
| 2 | 48647374 | 48647798 | KD2-H4K8ac_peak_17042 | 5.38581  |                                                       |
| 2 | 48667358 | 48667671 | KD2-H4K8ac_peak_17043 | 8.10216  | RP11-191L17.1_ENSG00000272663;PPP1R21_ENSG00000162869 |
| 2 | 48757395 | 48757920 | KD2-H4K8ac_peak_17044 | 4.211    | STON1_ENSG00000243244;STON1-GTF2A1L_ENSG00000068781   |
| 2 | 51259436 | 51259844 | KD2-H4K8ac_peak_17045 | 4.42765  | NRXN1_ENSG00000179915;AC007682.1_ENSG00000231918      |
| 2 | 53994203 | 53994415 | KD2-H4K8ac_peak_17046 | 5.57044  | CHAC2_ENSG00000143942                                 |
| 2 | 53994958 | 53995206 | KD2-H4K8ac_peak_17047 | 7.22457  | CHAC2_ENSG00000143942                                 |
| 2 | 54013706 | 54013932 | KD2-H4K8ac_peak_17048 | 4.67342  | ERLEC1_ENSG00000068912                                |
| 2 | 54197741 | 54198762 | KD2-H4K8ac_peak_17049 | 14.15075 | PSME4_ENSG00000068878;ACYP2_ENSG00000170634           |
| 2 | 54342509 | 54342967 | KD2-H4K8ac_peak_17050 | 19.51835 |                                                       |
| 2 | 54557333 | 54557856 | KD2-H4K8ac_peak_17051 | 7.76329  | C2orf73_ENSG00000177994                               |
| 2 | 54558063 | 54558589 | KD2-H4K8ac_peak_17052 | 6.66692  | C2orf73_ENSG00000177994                               |
| 2 | 54682798 | 54683234 | KD2-H4K8ac_peak_17053 | 12.06346 | SPTBN1_ENSG00000115306                                |
| 2 | 54684423 | 54684948 | KD2-H4K8ac_peak_17054 | 10.08874 |                                                       |
| 2 | 55276326 | 55276853 | KD2-H4K8ac_peak_17055 | 7.73264  |                                                       |
| 2 | 55277049 | 55277539 | KD2-H4K8ac_peak_17056 | 8.53092  |                                                       |
| 2 | 55338713 | 55339231 | KD2-H4K8ac_peak_17057 | 8.04763  | RTN4_ENSG00000115310                                  |
| 2 | 55459982 | 55460281 | KD2-H4K8ac_peak_17058 | 5.29555  | CLHC1_ENSG00000162994;RPS27A_ENSG00000143947          |
| 2 | 55495805 | 55496825 | KD2-H4K8ac_peak_17059 | 9.59147  | MTIF2_ENSG00000085760                                 |
| 2 | 55646377 | 55646817 | KD2-H4K8ac_peak_17060 | 9.11031  | CCDC88A_ENSG00000115355                               |
| 2 | 55746116 | 55746459 | KD2-H4K8ac_peak_17061 | 5.54647  | CCDC104_ENSG00000163001                               |
| 2 | 55746870 | 55747090 | KD2-H4K8ac_peak_17062 | 4.54006  | CCDC104_ENSG00000163001                               |
| 2 | 55844472 | 55844756 | KD2-H4K8ac_peak_17063 | 16.822   | RP11-554J4.1_ENSG00000272606                          |
| 2 | 55845195 | 55845407 | KD2-H4K8ac_peak_17064 | 5.86783  | SMEK2_ENSG00000138041;RP11-554J4.1_ENSG00000272606    |

|   |          |          |                       |          |                                                     |
|---|----------|----------|-----------------------|----------|-----------------------------------------------------|
| 2 | 57948310 | 57948505 | KD2-H4K8ac_peak_17065 | 4.42765  |                                                     |
| 2 | 57987253 | 57987447 | KD2-H4K8ac_peak_17066 | 10.53377 |                                                     |
| 2 | 58468084 | 58468420 | KD2-H4K8ac_peak_17067 | 9.20193  | FANCL_ENSG00000115392;RP11-334G22.1_ENSG00000273063 |
| 2 | 58654766 | 58655092 | KD2-H4K8ac_peak_17068 | 6.31143  | LINC01122_ENSG00000233723                           |
| 2 | 58655866 | 58656302 | KD2-H4K8ac_peak_17069 | 9.11031  | LINC01122_ENSG00000233723                           |
| 2 | 60776597 | 60776834 | KD2-H4K8ac_peak_17070 | 6.94954  |                                                     |
| 2 | 60781177 | 60781460 | KD2-H4K8ac_peak_17071 | 5.32933  | BCL11A_ENSG00000119866                              |
| 2 | 60808734 | 60809032 | KD2-H4K8ac_peak_17072 | 8.86099  |                                                     |
| 2 | 61108208 | 61108506 | KD2-H4K8ac_peak_17073 | 12.17278 | AC010733.4_ENSG00000228414;REL_ENSG00000162924      |
| 2 | 61243977 | 61244758 | KD2-H4K8ac_peak_17074 | 9.63487  | PUS10_ENSG00000162927;PEX13_ENSG00000162928         |
| 2 | 61293054 | 61293671 | KD2-H4K8ac_peak_17075 | 17.42214 | KIAA1841_ENSG00000162929                            |
| 2 | 61371615 | 61372011 | KD2-H4K8ac_peak_17076 | 9.11031  | AC016747.3_ENSG00000212978;C2orf74_ENSG00000237651  |
| 2 | 61372631 | 61372944 | KD2-H4K8ac_peak_17077 | 5.14125  | AC016747.3_ENSG00000212978;C2orf74_ENSG00000237651  |
| 2 | 61403739 | 61405299 | KD2-H4K8ac_peak_17078 | 14.68449 | AHSA2_ENSG00000173209                               |
| 2 | 61407633 | 61407919 | KD2-H4K8ac_peak_17079 | 7.70289  |                                                     |
| 2 | 61697409 | 61697839 | KD2-H4K8ac_peak_17080 | 14.42504 | USP34_ENSG00000115464;RP11-355B11.2_ENSG00000270820 |
| 2 | 61698559 | 61698851 | KD2-H4K8ac_peak_17081 | 4.42765  | USP34_ENSG00000115464;RP11-355B11.2_ENSG00000270820 |
| 2 | 61764975 | 61765322 | KD2-H4K8ac_peak_17082 | 6.8713   | XPO1_ENSG00000082898                                |
| 2 | 61766036 | 61766300 | KD2-H4K8ac_peak_17083 | 5.30799  | XPO1_ENSG00000082898                                |
| 2 | 61921574 | 61921817 | KD2-H4K8ac_peak_17084 | 7.49599  |                                                     |
| 2 | 62080922 | 62081145 | KD2-H4K8ac_peak_17085 | 15.52826 | FAM161A_ENSG00000170264                             |
| 2 | 62081847 | 62082685 | KD2-H4K8ac_peak_17086 | 5.88845  | FAM161A_ENSG00000170264                             |
| 2 | 62115535 | 62115984 | KD2-H4K8ac_peak_17087 | 8.55271  | CCT4_ENSG00000115484;COMMD1_ENSG00000173163         |
| 2 | 62403614 | 62404019 | KD2-H4K8ac_peak_17088 | 4.211    |                                                     |
| 2 | 62404237 | 62404500 | KD2-H4K8ac_peak_17089 | 4.211    |                                                     |
| 2 | 62422462 | 62423089 | KD2-H4K8ac_peak_17090 | 13.09607 | B3GNT2_ENSG00000170340                              |
| 2 | 62423283 | 62423834 | KD2-H4K8ac_peak_17091 | 12.00273 | B3GNT2_ENSG00000170340                              |
| 2 | 62520789 | 62521534 | KD2-H4K8ac_peak_17092 | 17.16047 |                                                     |
| 2 | 62561545 | 62561770 | KD2-H4K8ac_peak_17093 | 7.44366  |                                                     |
| 2 | 62568704 | 62568900 | KD2-H4K8ac_peak_17094 | 6.40683  |                                                     |
| 2 | 62638928 | 62639149 | KD2-H4K8ac_peak_17095 | 11.30637 |                                                     |
| 2 | 62683865 | 62684973 | KD2-H4K8ac_peak_17096 | 16.11042 |                                                     |
| 2 | 62732493 | 62733612 | KD2-H4K8ac_peak_17097 | 24.94195 |                                                     |
| 2 | 63277347 | 63277556 | KD2-H4K8ac_peak_17098 | 6.03693  | OTX1_ENSG00000115507                                |
| 2 | 63278360 | 63278634 | KD2-H4K8ac_peak_17099 | 6.31143  |                                                     |
| 2 | 63816136 | 63816566 | KD2-H4K8ac_peak_17100 | 10.05606 | MDH1_ENSG00000014641                                |
| 2 | 64068193 | 64068778 | KD2-H4K8ac_peak_17101 | 12.84642 | UGP2_ENSG00000169764                                |
| 2 | 64246049 | 64246982 | KD2-H4K8ac_peak_17102 | 11.50346 | VPS54_ENSG00000143952                               |
| 2 | 64280328 | 64280702 | KD2-H4K8ac_peak_17103 | 9.1707   |                                                     |
| 2 | 64370818 | 64371442 | KD2-H4K8ac_peak_17104 | 13.9234  | PEL1I_ENSG00000197329;AC074289.1_ENSG00000225889    |
| 2 | 64454944 | 64455296 | KD2-H4K8ac_peak_17105 | 4.01115  |                                                     |
| 2 | 64455597 | 64455826 | KD2-H4K8ac_peak_17106 | 5.54647  |                                                     |
| 2 | 64631340 | 64631583 | KD2-H4K8ac_peak_17107 | 4.24756  |                                                     |
| 2 | 64681328 | 64682278 | KD2-H4K8ac_peak_17108 | 15.52826 | AC008074.3_ENSG00000223935;LGALS1L_ENSG00000119862  |
| 2 | 64751582 | 64751889 | KD2-H4K8ac_peak_17109 | 12.00597 | RP11-568N6.1_ENSG00000260101;AFTPH_ENSG00000119844  |
| 2 | 64852736 | 64852971 | KD2-H4K8ac_peak_17110 | 5.10505  |                                                     |



|   |          |          |                       |          |                                                 |
|---|----------|----------|-----------------------|----------|-------------------------------------------------|
| 2 | 64854775 | 64854997 | KD2-H4K8ac_peak_17111 | 5.21139  |                                                 |
| 2 | 64880544 | 64880943 | KD2-H4K8ac_peak_17112 | 12.22449 |                                                 |
| 2 | 64881485 | 64881844 | KD2-H4K8ac_peak_17113 | 6.84261  |                                                 |
| 2 | 64978645 | 64979010 | KD2-H4K8ac_peak_17114 | 10.05606 | SERTAD2_ENSG00000179833                         |
| 2 | 64995047 | 64995635 | KD2-H4K8ac_peak_17115 | 20.5798  |                                                 |
| 2 | 65084885 | 65085350 | KD2-H4K8ac_peak_17116 | 4.211    |                                                 |
| 2 | 65085636 | 65085946 | KD2-H4K8ac_peak_17117 | 5.75452  |                                                 |
| 2 | 65091311 | 65091664 | KD2-H4K8ac_peak_17118 | 6.44277  | AC007880.1_ENSG00000234572                      |
| 2 | 65092289 | 65093087 | KD2-H4K8ac_peak_17119 | 13.34404 |                                                 |
| 2 | 65100873 | 65101072 | KD2-H4K8ac_peak_17120 | 8.30974  |                                                 |
| 2 | 65101315 | 65101522 | KD2-H4K8ac_peak_17121 | 4.7849   |                                                 |
| 2 | 65186814 | 65187066 | KD2-H4K8ac_peak_17122 | 8.17902  | AC007386.3_ENSG00000227394                      |
| 2 | 65215552 | 65216351 | KD2-H4K8ac_peak_17123 | 19.55721 | SLC1A4_ENSG00000115902                          |
| 2 | 65216574 | 65217073 | KD2-H4K8ac_peak_17124 | 11.92978 | SLC1A4_ENSG00000115902                          |
| 2 | 65356732 | 65357167 | KD2-H4K8ac_peak_17125 | 10.1591  | RAB1A_ENSG00000138069                           |
| 2 | 65357878 | 65358320 | KD2-H4K8ac_peak_17126 | 5.30799  | RAB1A_ENSG00000138069                           |
| 2 | 65454414 | 65454613 | KD2-H4K8ac_peak_17127 | 5.54647  | ACTR2_ENSG00000138071                           |
| 2 | 65454989 | 65455283 | KD2-H4K8ac_peak_17128 | 13.70605 | ACTR2_ENSG00000138071                           |
| 2 | 65579023 | 65579372 | KD2-H4K8ac_peak_17129 | 5.25071  |                                                 |
| 2 | 65581352 | 65581562 | KD2-H4K8ac_peak_17130 | 7.12754  |                                                 |
| 2 | 65594051 | 65594289 | KD2-H4K8ac_peak_17131 | 4.04247  |                                                 |
| 2 | 65658314 | 65658525 | KD2-H4K8ac_peak_17132 | 6.30229  |                                                 |
| 2 | 65658749 | 65659049 | KD2-H4K8ac_peak_17133 | 4.91674  | SPRED2_ENSG00000198369                          |
| 2 | 65662780 | 65663488 | KD2-H4K8ac_peak_17134 | 11.55418 | AC074391.1_ENSG00000204929                      |
| 2 | 65693158 | 65693649 | KD2-H4K8ac_peak_17135 | 8.30974  |                                                 |
| 2 | 66072171 | 66072398 | KD2-H4K8ac_peak_17136 | 4.04247  |                                                 |
| 2 | 66296853 | 66297491 | KD2-H4K8ac_peak_17137 | 12.06346 |                                                 |
| 2 | 66652789 | 66653721 | KD2-H4K8ac_peak_17138 | 15.19698 |                                                 |
| 2 | 66661138 | 66662092 | KD2-H4K8ac_peak_17139 | 18.94636 | MEIS1-AS3_ENSG00000226819;MEIS1_ENSG00000143995 |
| 2 | 66664754 | 66665783 | KD2-H4K8ac_peak_17140 | 10.81728 |                                                 |
| 2 | 66666361 | 66667060 | KD2-H4K8ac_peak_17141 | 9.63487  | MEIS1-AS2_ENSG00000230749                       |
| 2 | 66802766 | 66803425 | KD2-H4K8ac_peak_17142 | 6.0073   |                                                 |
| 2 | 66804703 | 66804960 | KD2-H4K8ac_peak_17143 | 4.59928  |                                                 |
| 2 | 67190287 | 67190707 | KD2-H4K8ac_peak_17144 | 12.80176 |                                                 |
| 2 | 67215296 | 67215841 | KD2-H4K8ac_peak_17145 | 8.04763  |                                                 |
| 2 | 67232830 | 67233023 | KD2-H4K8ac_peak_17146 | 5.59859  |                                                 |
| 2 | 67234905 | 67235100 | KD2-H4K8ac_peak_17147 | 7.22457  |                                                 |
| 2 | 67440662 | 67440876 | KD2-H4K8ac_peak_17148 | 10.0692  |                                                 |
| 2 | 67545262 | 67545686 | KD2-H4K8ac_peak_17149 | 6.94954  |                                                 |
| 2 | 67546424 | 67546682 | KD2-H4K8ac_peak_17150 | 7.47462  |                                                 |
| 2 | 67551907 | 67552390 | KD2-H4K8ac_peak_17151 | 5.57044  | AC023115.4_ENSG00000236605                      |
| 2 | 67623689 | 67623909 | KD2-H4K8ac_peak_17152 | 8.17902  | ETAA1_ENSG00000143971                           |
| 2 | 67624674 | 67625131 | KD2-H4K8ac_peak_17153 | 6.84261  | ETAA1_ENSG00000143971                           |
| 2 | 67877042 | 67877373 | KD2-H4K8ac_peak_17154 | 5.88845  |                                                 |
| 2 | 67893286 | 67893851 | KD2-H4K8ac_peak_17155 | 8.04763  |                                                 |
| 2 | 67913369 | 67913573 | KD2-H4K8ac_peak_17156 | 5.88845  |                                                 |

|   |          |          |                       |          |                                                    |
|---|----------|----------|-----------------------|----------|----------------------------------------------------|
| 2 | 67928541 | 67928890 | KD2-H4K8ac_peak_17157 | 8.1233   |                                                    |
| 2 | 67945279 | 67945481 | KD2-H4K8ac_peak_17158 | 6.16888  |                                                    |
| 2 | 67981808 | 67982019 | KD2-H4K8ac_peak_17159 | 4.42765  |                                                    |
| 2 | 67982424 | 67982672 | KD2-H4K8ac_peak_17160 | 7.01658  |                                                    |
| 2 | 67983098 | 67984215 | KD2-H4K8ac_peak_17161 | 4.86324  |                                                    |
| 2 | 68069530 | 68069740 | KD2-H4K8ac_peak_17162 | 6.56211  |                                                    |
| 2 | 68072908 | 68073330 | KD2-H4K8ac_peak_17163 | 7.0983   |                                                    |
| 2 | 68271593 | 68271883 | KD2-H4K8ac_peak_17164 | 8.30974  |                                                    |
| 2 | 68274613 | 68274836 | KD2-H4K8ac_peak_17165 | 4.211    |                                                    |
| 2 | 68289800 | 68290421 | KD2-H4K8ac_peak_17166 | 11.30637 |                                                    |
| 2 | 68384324 | 68384893 | KD2-H4K8ac_peak_17167 | 8.30974  | WDR92_ENSG00000243667;PNO1_ENSG00000115946         |
| 2 | 68479142 | 68479569 | KD2-H4K8ac_peak_17168 | 5.88845  | RP11-474G23.3_ENSG00000273064                      |
| 2 | 68546150 | 68546466 | KD2-H4K8ac_peak_17169 | 11.24702 | CNRIP1_ENSG00000119865                             |
| 2 | 68546664 | 68547021 | KD2-H4K8ac_peak_17170 | 11.80283 | CNRIP1_ENSG00000119865                             |
| 2 | 68694791 | 68695041 | KD2-H4K8ac_peak_17171 | 9.34195  | FBXO48_ENSG00000204923;APLF_ENSG00000169621        |
| 2 | 68870164 | 68870892 | KD2-H4K8ac_peak_17172 | 8.74596  | PROKR1_ENSG00000169618                             |
| 2 | 69027007 | 69027434 | KD2-H4K8ac_peak_17173 | 9.08816  |                                                    |
| 2 | 69170895 | 69171569 | KD2-H4K8ac_peak_17174 | 18.94636 |                                                    |
| 2 | 69240485 | 69240782 | KD2-H4K8ac_peak_17175 | 11.05467 | ANTXR1_ENSG00000169604                             |
| 2 | 69532945 | 69533268 | KD2-H4K8ac_peak_17176 | 5.43522  |                                                    |
| 2 | 69533625 | 69534631 | KD2-H4K8ac_peak_17177 | 9.36516  |                                                    |
| 2 | 69614062 | 69614289 | KD2-H4K8ac_peak_17178 | 5.75757  | GFPT1_ENSG00000198380                              |
| 2 | 69664195 | 69664443 | KD2-H4K8ac_peak_17179 | 6.98244  | NFU1_ENSG00000169599                               |
| 2 | 69664818 | 69665444 | KD2-H4K8ac_peak_17180 | 6.90231  | NFU1_ENSG00000169599                               |
| 2 | 69871468 | 69871817 | KD2-H4K8ac_peak_17181 | 10.0692  | ANXA4_ENSG00000196975                              |
| 2 | 69968668 | 69969510 | KD2-H4K8ac_peak_17182 | 10.19949 |                                                    |
| 2 | 70056192 | 70057129 | KD2-H4K8ac_peak_17183 | 21.69575 | GMCL1_ENSG00000087338                              |
| 2 | 70120439 | 70120839 | KD2-H4K8ac_peak_17184 | 5.30799  | SNRNP27_ENSG00000124380                            |
| 2 | 70140812 | 70141049 | KD2-H4K8ac_peak_17185 | 3.75035  | snoU13_ENSG00000238465                             |
| 2 | 70141320 | 70141629 | KD2-H4K8ac_peak_17186 | 11.05467 |                                                    |
| 2 | 70298251 | 70298744 | KD2-H4K8ac_peak_17187 | 5.6755   |                                                    |
| 2 | 70312364 | 70312557 | KD2-H4K8ac_peak_17188 | 4.86324  |                                                    |
| 2 | 70313129 | 70314503 | KD2-H4K8ac_peak_17189 | 12.57865 | PCBP1_ENSG00000169564                              |
| 2 | 70335915 | 70336434 | KD2-H4K8ac_peak_17190 | 9.06703  |                                                    |
| 2 | 70350703 | 70353161 | KD2-H4K8ac_peak_17191 | 20.88898 | AC016700.5_ENSG00000231327                         |
| 2 | 70355341 | 70355534 | KD2-H4K8ac_peak_17192 | 6.44277  |                                                    |
| 2 | 70368683 | 70369688 | KD2-H4K8ac_peak_17193 | 31.88004 |                                                    |
| 2 | 70370428 | 70371127 | KD2-H4K8ac_peak_17194 | 8.30974  |                                                    |
| 2 | 70417641 | 70418136 | KD2-H4K8ac_peak_17195 | 14.8083  |                                                    |
| 2 | 70418360 | 70418714 | KD2-H4K8ac_peak_17196 | 5.20908  |                                                    |
| 2 | 70475259 | 70475716 | KD2-H4K8ac_peak_17197 | 22.00006 | C2orf42_ENSG00000115998;TIA1_ENSG00000116001       |
| 2 | 70484887 | 70485110 | KD2-H4K8ac_peak_17198 | 9.96798  | PCYOX1_ENSG00000116005                             |
| 2 | 70521065 | 70521589 | KD2-H4K8ac_peak_17199 | 20.78681 | SNRPG_ENSG00000143977                              |
| 2 | 70528658 | 70529147 | KD2-H4K8ac_peak_17200 | 13.57407 | FAM136A_ENSG00000035141;AC022201.5_ENSG00000233849 |
| 2 | 70530806 | 70531031 | KD2-H4K8ac_peak_17201 | 10.34425 |                                                    |
| 2 | 70704864 | 70705163 | KD2-H4K8ac_peak_17202 | 7.12754  |                                                    |

|   |          |          |                       |          |                                                          |
|---|----------|----------|-----------------------|----------|----------------------------------------------------------|
| 2 | 70781002 | 70781202 | KD2-H4K8ac_peak_17203 | 6.25869  | TGFA_ENSG00000163235                                     |
| 2 | 70947962 | 70948160 | KD2-H4K8ac_peak_17204 | 6.00226  |                                                          |
| 2 | 70994290 | 70995304 | KD2-H4K8ac_peak_17205 | 6.65673  | ADD2_ENSG00000075340                                     |
| 2 | 71127092 | 71127525 | KD2-H4K8ac_peak_17206 | 7.40314  | VAX2_ENSG00000116035                                     |
| 2 | 71166037 | 71166240 | KD2-H4K8ac_peak_17207 | 4.01796  |                                                          |
| 2 | 71203800 | 71204092 | KD2-H4K8ac_peak_17208 | 6.40683  |                                                          |
| 2 | 71227845 | 71228171 | KD2-H4K8ac_peak_17209 | 5.59859  |                                                          |
| 2 | 71228527 | 71228945 | KD2-H4K8ac_peak_17210 | 5.9696   |                                                          |
| 2 | 71270603 | 71270892 | KD2-H4K8ac_peak_17211 | 14.45402 |                                                          |
| 2 | 71294835 | 71295280 | KD2-H4K8ac_peak_17212 | 6.65673  | RP11-467P9.1_ENSG00000272735                             |
| 2 | 71295821 | 71296013 | KD2-H4K8ac_peak_17213 | 7.44324  | RP11-467P9.1_ENSG00000272735                             |
| 2 | 71357737 | 71358098 | KD2-H4K8ac_peak_17214 | 11.05407 | MCEE_ENSG00000124370;MPHOSPH10_ENSG00000124383           |
| 2 | 71453881 | 71454112 | KD2-H4K8ac_peak_17215 | 7.69287  | PAIP2B_ENSG00000124374                                   |
| 2 | 71503771 | 71504115 | KD2-H4K8ac_peak_17216 | 5.88845  | ZNF638_ENSG00000075292                                   |
| 2 | 71558943 | 71559449 | KD2-H4K8ac_peak_17217 | 12.93209 |                                                          |
| 2 | 73114168 | 73115005 | KD2-H4K8ac_peak_17218 | 7.76104  | SPR_ENSG00000116096                                      |
| 2 | 73298021 | 73298274 | KD2-H4K8ac_peak_17219 | 7.50083  |                                                          |
| 2 | 73299130 | 73299388 | KD2-H4K8ac_peak_17220 | 6.25869  |                                                          |
| 2 | 73402736 | 73403161 | KD2-H4K8ac_peak_17221 | 7.40314  |                                                          |
| 2 | 73404130 | 73404385 | KD2-H4K8ac_peak_17222 | 6.2781   |                                                          |
| 2 | 73441116 | 73441689 | KD2-H4K8ac_peak_17223 | 28.02409 | SMYD5_ENSG00000135632                                    |
| 2 | 73461479 | 73461965 | KD2-H4K8ac_peak_17224 | 14.66631 | CCT7_ENSG00000135624                                     |
| 2 | 73511167 | 73511383 | KD2-H4K8ac_peak_17225 | 4.91674  | FBXO41_ENSG00000163013                                   |
| 2 | 73511729 | 73512358 | KD2-H4K8ac_peak_17226 | 8.79106  | FBXO41_ENSG00000163013                                   |
| 2 | 73964735 | 73965430 | KD2-H4K8ac_peak_17227 | 8.55271  | TPRKB_ENSG00000144034                                    |
| 2 | 74056164 | 74056653 | KD2-H4K8ac_peak_17228 | 16.61426 | STAMBP_ENSG00000124356                                   |
| 2 | 74154058 | 74154288 | KD2-H4K8ac_peak_17229 | 9.36516  | DGUOK_ENSG00000114956                                    |
| 2 | 74211162 | 74212286 | KD2-H4K8ac_peak_17230 | 20.02161 | AC073046.25_ENSG00000235499                              |
| 2 | 74212603 | 74213218 | KD2-H4K8ac_peak_17231 | 14.07373 | AC073046.25_ENSG00000235499;RP11-711M9.1_ENSG00000255989 |
| 2 | 74347288 | 74347761 | KD2-H4K8ac_peak_17232 | 25.10776 | FNBP1P1_ENSG00000257800                                  |
| 2 | 74375219 | 74375686 | KD2-H4K8ac_peak_17233 | 5.13615  | BOLA3_ENSG00000163170;BOLA3-AS1_ENSG00000225439          |
| 2 | 74406433 | 74406905 | KD2-H4K8ac_peak_17234 | 7.27716  | MOB1A_ENSG00000114978                                    |
| 2 | 74425811 | 74426291 | KD2-H4K8ac_peak_17235 | 22.59108 | MTHFD2_ENSG00000065911                                   |
| 2 | 74618614 | 74618900 | KD2-H4K8ac_peak_17236 | 7.76329  | DCTN1_ENSG00000204843                                    |
| 2 | 74619543 | 74619830 | KD2-H4K8ac_peak_17237 | 5.08628  | DCTN1_ENSG00000204843                                    |
| 2 | 74648457 | 74648707 | KD2-H4K8ac_peak_17238 | 14.06758 | C2orf81_ENSG00000159239;WDR54_ENSG00000005448            |
| 2 | 74649024 | 74649757 | KD2-H4K8ac_peak_17239 | 11.89502 | C2orf81_ENSG00000159239;WDR54_ENSG00000005448            |
| 2 | 74667179 | 74668543 | KD2-H4K8ac_peak_17240 | 14.80472 |                                                          |
| 2 | 74684126 | 74684334 | KD2-H4K8ac_peak_17241 | 8.55271  |                                                          |
| 2 | 74684592 | 74685045 | KD2-H4K8ac_peak_17242 | 18.88045 | WBP1_ENSG00000239779                                     |
| 2 | 74685652 | 74686256 | KD2-H4K8ac_peak_17243 | 11.43863 | WBP1_ENSG00000239779                                     |
| 2 | 74692014 | 74692450 | KD2-H4K8ac_peak_17244 | 7.28628  | MOGS_ENSG00000115275                                     |
| 2 | 74692675 | 74692993 | KD2-H4K8ac_peak_17245 | 6.69204  | MOGS_ENSG00000115275                                     |
| 2 | 74699247 | 74700678 | KD2-H4K8ac_peak_17246 | 9.20193  | MRPL53_ENSG00000204822                                   |
| 2 | 74709633 | 74709959 | KD2-H4K8ac_peak_17247 | 7.18615  | CCDC142_ENSG00000135637;TTC31_ENSG00000115282            |
| 2 | 74726073 | 74726273 | KD2-H4K8ac_peak_17248 | 4.06758  | AC005041.17_ENSG00000258821                              |

|   |          |          |                       |          |                                                   |
|---|----------|----------|-----------------------|----------|---------------------------------------------------|
| 2 | 74734985 | 74735345 | KD2-H4K8ac_peak_17249 | 30.61401 | PCGF1_ENSG00000115289                             |
| 2 | 74735574 | 74735897 | KD2-H4K8ac_peak_17250 | 8.55552  | PCGF1_ENSG00000115289                             |
| 2 | 74739522 | 74742535 | KD2-H4K8ac_peak_17251 | 15.82362 | TLX2_ENSG00000115297                              |
| 2 | 74756369 | 74756767 | KD2-H4K8ac_peak_17252 | 10.29842 | AUP1_ENSG00000115307;HTRA2_ENSG00000115317        |
| 2 | 74776233 | 74776936 | KD2-H4K8ac_peak_17253 | 10.76532 | DOK1_ENSG00000115325                              |
| 2 | 74780261 | 74781087 | KD2-H4K8ac_peak_17254 | 9.402    |                                                   |
| 2 | 74781301 | 74782046 | KD2-H4K8ac_peak_17255 | 12.17278 | LOXL3_ENSG00000115318                             |
| 2 | 74782285 | 74782546 | KD2-H4K8ac_peak_17256 | 4.86324  | LOXL3_ENSG00000115318                             |
| 2 | 74874234 | 74874577 | KD2-H4K8ac_peak_17257 | 5.25071  | M1AP_ENSG00000159374                              |
| 2 | 74880745 | 74881050 | KD2-H4K8ac_peak_17258 | 8.53581  | SEMA4F_ENSG00000135622                            |
| 2 | 74881407 | 74881993 | KD2-H4K8ac_peak_17259 | 13.73635 | SEMA4F_ENSG00000135622                            |
| 2 | 75005687 | 75006263 | KD2-H4K8ac_peak_17260 | 6.40297  |                                                   |
| 2 | 75044017 | 75044241 | KD2-H4K8ac_peak_17261 | 9.11031  |                                                   |
| 2 | 75061920 | 75062224 | KD2-H4K8ac_peak_17262 | 9.65086  | RP11-259N19.1_ENSG00000272711;HK2_ENSG00000159399 |
| 2 | 75088087 | 75088349 | KD2-H4K8ac_peak_17263 | 6.37652  |                                                   |
| 2 | 75185392 | 75186218 | KD2-H4K8ac_peak_17264 | 13.80019 | POLE4_ENSG00000115350                             |
| 2 | 75720157 | 75720447 | KD2-H4K8ac_peak_17265 | 5.88845  |                                                   |
| 2 | 75835967 | 75836337 | KD2-H4K8ac_peak_17266 | 9.89126  |                                                   |
| 2 | 75873653 | 75874218 | KD2-H4K8ac_peak_17267 | 14.17488 | MRPL19_ENSG00000115364                            |
| 2 | 75937731 | 75938335 | KD2-H4K8ac_peak_17268 | 7.30812  | GCFC2_ENSG00000005436                             |
| 2 | 76015456 | 76015749 | KD2-H4K8ac_peak_17269 | 7.96194  |                                                   |
| 2 | 76026875 | 76027076 | KD2-H4K8ac_peak_17270 | 6.40683  |                                                   |
| 2 | 76300374 | 76300825 | KD2-H4K8ac_peak_17271 | 5.57044  |                                                   |
| 2 | 76303028 | 76303246 | KD2-H4K8ac_peak_17272 | 6.16888  |                                                   |
| 2 | 76497105 | 76497437 | KD2-H4K8ac_peak_17273 | 6.16888  |                                                   |
| 2 | 76537459 | 76537891 | KD2-H4K8ac_peak_17274 | 6.16888  |                                                   |
| 2 | 76829628 | 76829824 | KD2-H4K8ac_peak_17275 | 7.12754  |                                                   |
| 2 | 76911571 | 76912315 | KD2-H4K8ac_peak_17276 | 6.40683  |                                                   |
| 2 | 76918126 | 76918500 | KD2-H4K8ac_peak_17277 | 5.13615  |                                                   |
| 2 | 79006380 | 79006613 | KD2-H4K8ac_peak_17278 | 6.07178  |                                                   |
| 2 | 80276924 | 80277128 | KD2-H4K8ac_peak_17279 | 4.01115  |                                                   |
| 2 | 80593412 | 80593720 | KD2-H4K8ac_peak_17280 | 7.12754  |                                                   |
| 2 | 81708454 | 81708788 | KD2-H4K8ac_peak_17281 | 5.71749  |                                                   |
| 2 | 85132309 | 85132586 | KD2-H4K8ac_peak_17282 | 9.63487  | TMSB10_ENSG00000034510                            |
| 2 | 85132823 | 85133520 | KD2-H4K8ac_peak_17283 | 15.58442 | TRABD2A_ENSG00000186854;TMSB10_ENSG00000034510    |
| 2 | 85153589 | 85154083 | KD2-H4K8ac_peak_17284 | 4.8888   |                                                   |
| 2 | 85197182 | 85197988 | KD2-H4K8ac_peak_17285 | 8.30974  | KCMF1_ENSG00000176407                             |
| 2 | 85198434 | 85198778 | KD2-H4K8ac_peak_17286 | 9.1707   | KCMF1_ENSG00000176407                             |
| 2 | 85199028 | 85199374 | KD2-H4K8ac_peak_17287 | 5.75452  | KCMF1_ENSG00000176407                             |
| 2 | 85359829 | 85360032 | KD2-H4K8ac_peak_17288 | 6.0073   | TCF7L1_ENSG00000152284                            |
| 2 | 85443030 | 85444215 | KD2-H4K8ac_peak_17289 | 11.05407 |                                                   |
| 2 | 85472543 | 85472736 | KD2-H4K8ac_peak_17290 | 5.75452  |                                                   |
| 2 | 85481499 | 85483614 | KD2-H4K8ac_peak_17291 | 16.57619 |                                                   |
| 2 | 85483834 | 85485043 | KD2-H4K8ac_peak_17292 | 19.12154 |                                                   |
| 2 | 85494128 | 85494346 | KD2-H4K8ac_peak_17293 | 6.4095   |                                                   |
| 2 | 85555208 | 85555628 | KD2-H4K8ac_peak_17294 | 6.99815  | TGOLN2_ENSG00000152291                            |

|   |          |          |                       |          |                                                    |
|---|----------|----------|-----------------------|----------|----------------------------------------------------|
| 2 | 85581957 | 85582158 | KD2-H4K8ac_peak_17295 | 4.06758  | RETSAT_ENSG00000042445;ELMOD3_ENSG00000115459      |
| 2 | 85644798 | 85646661 | KD2-H4K8ac_peak_17296 | 24.23147 | CAPG_ENSG00000042493;SH2D6_ENSG00000152292         |
| 2 | 85648076 | 85648376 | KD2-H4K8ac_peak_17297 | 7.59794  |                                                    |
| 2 | 85657599 | 85657856 | KD2-H4K8ac_peak_17298 | 4.42765  |                                                    |
| 2 | 85660051 | 85662071 | KD2-H4K8ac_peak_17299 | 14.83804 | Y_RNA_ENSG00000207207                              |
| 2 | 85662292 | 85663101 | KD2-H4K8ac_peak_17300 | 7.69287  | Y_RNA_ENSG00000207207                              |
| 2 | 85663316 | 85665072 | KD2-H4K8ac_peak_17301 | 17.75427 |                                                    |
| 2 | 85665480 | 85666083 | KD2-H4K8ac_peak_17302 | 16.54484 |                                                    |
| 2 | 85672640 | 85673785 | KD2-H4K8ac_peak_17303 | 13.65567 |                                                    |
| 2 | 85673999 | 85674196 | KD2-H4K8ac_peak_17304 | 6.67538  |                                                    |
| 2 | 85674551 | 85674925 | KD2-H4K8ac_peak_17305 | 5.14125  |                                                    |
| 2 | 85750395 | 85751285 | KD2-H4K8ac_peak_17306 | 8.45238  |                                                    |
| 2 | 85751612 | 85752869 | KD2-H4K8ac_peak_17307 | 16.73922 |                                                    |
| 2 | 85764799 | 85765789 | KD2-H4K8ac_peak_17308 | 15.2334  | MAT2A_ENSG00000168906                              |
| 2 | 85766363 | 85767015 | KD2-H4K8ac_peak_17309 | 13.73635 | MAT2A_ENSG00000168906                              |
| 2 | 85788304 | 85788523 | KD2-H4K8ac_peak_17310 | 4.77079  | GGCX_ENSG00000115486;VAMP8_ENSG00000118640         |
| 2 | 85788809 | 85789108 | KD2-H4K8ac_peak_17311 | 6.85193  | GGCX_ENSG00000115486;VAMP8_ENSG00000118640         |
| 2 | 85811366 | 85811871 | KD2-H4K8ac_peak_17312 | 6.0605   | VAMP5_ENSG00000168899                              |
| 2 | 85822293 | 85822593 | KD2-H4K8ac_peak_17313 | 9.36665  | RNF181_ENSG00000168894                             |
| 2 | 85822934 | 85823208 | KD2-H4K8ac_peak_17314 | 10.20046 | RNF181_ENSG00000168894                             |
| 2 | 85829405 | 85829734 | KD2-H4K8ac_peak_17315 | 7.27716  | TMEM150A_ENSG00000168890;USP39_ENSG00000168883     |
| 2 | 85838884 | 85839159 | KD2-H4K8ac_peak_17316 | 10.17486 | C2orf68_ENSG00000168887                            |
| 2 | 85839576 | 85839962 | KD2-H4K8ac_peak_17317 | 11.79585 | C2orf68_ENSG00000168887                            |
| 2 | 85842642 | 85843089 | KD2-H4K8ac_peak_17318 | 8.7325   |                                                    |
| 2 | 85968499 | 85969259 | KD2-H4K8ac_peak_17319 | 6.20982  |                                                    |
| 2 | 85981490 | 85981822 | KD2-H4K8ac_peak_17320 | 4.82973  |                                                    |
| 2 | 85985895 | 85986132 | KD2-H4K8ac_peak_17321 | 4.56666  |                                                    |
| 2 | 85996760 | 85997375 | KD2-H4K8ac_peak_17322 | 7.20116  |                                                    |
| 2 | 85997788 | 85998166 | KD2-H4K8ac_peak_17323 | 4.66531  |                                                    |
| 2 | 85998501 | 85999069 | KD2-H4K8ac_peak_17324 | 4.54006  |                                                    |
| 2 | 85999944 | 86000798 | KD2-H4K8ac_peak_17325 | 10.46874 |                                                    |
| 2 | 86022059 | 86022334 | KD2-H4K8ac_peak_17326 | 5.88845  |                                                    |
| 2 | 86022775 | 86023024 | KD2-H4K8ac_peak_17327 | 5.08628  |                                                    |
| 2 | 86041135 | 86041367 | KD2-H4K8ac_peak_17328 | 6.66692  | AC105053.3_ENSG00000229498                         |
| 2 | 86054369 | 86054614 | KD2-H4K8ac_peak_17329 | 11.75669 |                                                    |
| 2 | 86054957 | 86055183 | KD2-H4K8ac_peak_17330 | 6.2159   |                                                    |
| 2 | 86115695 | 86116126 | KD2-H4K8ac_peak_17331 | 4.67342  | ST3GAL5_ENSG00000115525;AC105053.4_ENSG00000232504 |
| 2 | 86116490 | 86116792 | KD2-H4K8ac_peak_17332 | 7.13615  | ST3GAL5_ENSG00000115525;AC105053.4_ENSG00000232504 |
| 2 | 86262811 | 86263093 | KD2-H4K8ac_peak_17333 | 5.77905  |                                                    |
| 2 | 86263689 | 86264586 | KD2-H4K8ac_peak_17334 | 7.81657  |                                                    |
| 2 | 86333388 | 86333628 | KD2-H4K8ac_peak_17335 | 10.0692  | POLR1A_ENSG00000068654;PTCD3_ENSG00000132300       |
| 2 | 86422267 | 86422524 | KD2-H4K8ac_peak_17336 | 13.80019 | IMMT_ENSG00000132305;RP11-301O19.1_ENSG00000273080 |
| 2 | 86422955 | 86423423 | KD2-H4K8ac_peak_17337 | 7.76104  | IMMT_ENSG00000132305;RP11-301O19.1_ENSG00000273080 |
| 2 | 86426169 | 86426390 | KD2-H4K8ac_peak_17338 | 9.89126  | MRPL35_ENSG00000132313                             |
| 2 | 86476193 | 86476462 | KD2-H4K8ac_peak_17339 | 5.08628  |                                                    |
| 2 | 86564161 | 86564807 | KD2-H4K8ac_peak_17340 | 13.2739  | REEP1_ENSG00000068615                              |

|   |          |          |                       |          |                                                    |
|---|----------|----------|-----------------------|----------|----------------------------------------------------|
| 2 | 86595362 | 86595576 | KD2-H4K8ac_peak_17341 | 8.1233   |                                                    |
| 2 | 86789824 | 86790036 | KD2-H4K8ac_peak_17342 | 9.6247   | AC015971.2_ENSG00000228363                         |
| 2 | 86790843 | 86791298 | KD2-H4K8ac_peak_17343 | 9.08816  |                                                    |
| 2 | 86850270 | 86850630 | KD2-H4K8ac_peak_17344 | 6.84261  | RNF103_ENSG00000239305                             |
| 2 | 86851317 | 86851715 | KD2-H4K8ac_peak_17345 | 5.45396  | RNF103_ENSG00000239305                             |
| 2 | 87033619 | 87033933 | KD2-H4K8ac_peak_17346 | 9.15329  |                                                    |
| 2 | 87034270 | 87034650 | KD2-H4K8ac_peak_17347 | 5.75452  | CD8A_ENSG00000153563                               |
| 2 | 87303188 | 87303778 | KD2-H4K8ac_peak_17348 | 8.37231  | AC125232.1_ENSG00000231259                         |
| 2 | 87304058 | 87304282 | KD2-H4K8ac_peak_17349 | 14.15075 | AC125232.1_ENSG00000231259                         |
| 2 | 87568260 | 87568534 | KD2-H4K8ac_peak_17350 | 7.146    |                                                    |
| 2 | 87568930 | 87569600 | KD2-H4K8ac_peak_17351 | 17.51891 |                                                    |
| 2 | 87800559 | 87800805 | KD2-H4K8ac_peak_17352 | 10.21502 |                                                    |
| 2 | 87877298 | 87877828 | KD2-H4K8ac_peak_17353 | 10.21502 |                                                    |
| 2 | 87892950 | 87893278 | KD2-H4K8ac_peak_17354 | 9.11031  |                                                    |
| 2 | 87893537 | 87893785 | KD2-H4K8ac_peak_17355 | 10.21502 |                                                    |
| 2 | 87894083 | 87894493 | KD2-H4K8ac_peak_17356 | 16.57619 |                                                    |
| 2 | 87894697 | 87894920 | KD2-H4K8ac_peak_17357 | 9.63487  |                                                    |
| 2 | 87903487 | 87903714 | KD2-H4K8ac_peak_17358 | 11.30637 |                                                    |
| 2 | 87934067 | 87934768 | KD2-H4K8ac_peak_17359 | 11.30637 |                                                    |
| 2 | 87937115 | 87937344 | KD2-H4K8ac_peak_17360 | 5.88845  |                                                    |
| 2 | 88316118 | 88316880 | KD2-H4K8ac_peak_17361 | 10.21502 | RNU2-63P_ENSG00000222724                           |
| 2 | 88354654 | 88355254 | KD2-H4K8ac_peak_17362 | 6.66359  | KRCC1_ENSG00000172086                              |
| 2 | 88499350 | 88499666 | KD2-H4K8ac_peak_17363 | 7.59643  |                                                    |
| 2 | 88509724 | 88509961 | KD2-H4K8ac_peak_17364 | 5.90098  |                                                    |
| 2 | 88802612 | 88803139 | KD2-H4K8ac_peak_17365 | 15.58442 |                                                    |
| 2 | 88849340 | 88849734 | KD2-H4K8ac_peak_17366 | 5.75452  |                                                    |
| 2 | 88927452 | 88927730 | KD2-H4K8ac_peak_17367 | 7.07117  | EIF2AK3_ENSG00000172071;AC062029.1_ENSG00000234028 |
| 2 | 88991306 | 88991598 | KD2-H4K8ac_peak_17368 | 13.9234  | RPIA_ENSG00000153574                               |
| 2 | 91761774 | 91762325 | KD2-H4K8ac_peak_17369 | 17.84074 |                                                    |
| 2 | 91762866 | 91763588 | KD2-H4K8ac_peak_17370 | 12.49766 |                                                    |
| 2 | 91845547 | 91846087 | KD2-H4K8ac_peak_17371 | 14.89775 |                                                    |
| 2 | 91846677 | 91846905 | KD2-H4K8ac_peak_17372 | 6.20982  |                                                    |
| 2 | 91847146 | 91848474 | KD2-H4K8ac_peak_17373 | 19.00088 | AC027612.6_ENSG00000143429                         |
| 2 | 95742709 | 95742939 | KD2-H4K8ac_peak_17374 | 7.1181   |                                                    |
| 2 | 95787097 | 95788043 | KD2-H4K8ac_peak_17375 | 12.82393 |                                                    |
| 2 | 95824483 | 95825174 | KD2-H4K8ac_peak_17376 | 10.65724 |                                                    |
| 2 | 95825584 | 95826098 | KD2-H4K8ac_peak_17377 | 10.0692  |                                                    |
| 2 | 95830863 | 95831350 | KD2-H4K8ac_peak_17378 | 6.40297  | ZNF514_ENSG00000144026;ZNF2_ENSG00000163067        |
| 2 | 95872521 | 95873687 | KD2-H4K8ac_peak_17379 | 16.8435  | AC092835.2_ENSG00000233757                         |
| 2 | 96067786 | 96068296 | KD2-H4K8ac_peak_17380 | 8.28234  | FAHD2A_ENSG00000115042                             |
| 2 | 96068520 | 96068982 | KD2-H4K8ac_peak_17381 | 8.2413   | FAHD2A_ENSG00000115042                             |
| 2 | 96192224 | 96192922 | KD2-H4K8ac_peak_17382 | 11.02863 | RP11-440D17.3_ENSG00000272913                      |
| 2 | 96658324 | 96658569 | KD2-H4K8ac_peak_17383 | 12.42547 | ANKRD36C_ENSG00000174501                           |
| 2 | 96675609 | 96676182 | KD2-H4K8ac_peak_17384 | 9.63487  | FAHD2CP_ENSG00000231584                            |
| 2 | 96755731 | 96756060 | KD2-H4K8ac_peak_17385 | 10.53377 |                                                    |
| 2 | 96756658 | 96757260 | KD2-H4K8ac_peak_17386 | 4.66652  |                                                    |

|   |          |          |                       |          |                                                                          |
|---|----------|----------|-----------------------|----------|--------------------------------------------------------------------------|
| 2 | 96811847 | 96813157 | KD2-H4K8ac_peak_17387 | 17.70889 | DUSP2_ENSG00000158050;AC012307.2_ENSG00000228873                         |
| 2 | 96813357 | 96813906 | KD2-H4K8ac_peak_17388 | 13.13965 | AC012307.2_ENSG00000228873                                               |
| 2 | 96814249 | 96814501 | KD2-H4K8ac_peak_17389 | 5.00796  |                                                                          |
| 2 | 96874214 | 96874534 | KD2-H4K8ac_peak_17390 | 12.66412 | STARD7_ENSG00000084090;STARD7-AS1_ENSG00000204685                        |
| 2 | 96915632 | 96915845 | KD2-H4K8ac_peak_17391 | 7.74292  |                                                                          |
| 2 | 96931367 | 96931675 | KD2-H4K8ac_peak_17392 | 10.65724 | TMEM127_ENSG00000135956;CIAO1_ENSG00000144021                            |
| 2 | 96932056 | 96932294 | KD2-H4K8ac_peak_17393 | 8.10216  | TMEM127_ENSG00000135956;CIAO1_ENSG00000144021                            |
| 2 | 96970831 | 96971179 | KD2-H4K8ac_peak_17394 | 9.90914  | SNRNP200_ENSG00000144028                                                 |
| 2 | 96971378 | 96972020 | KD2-H4K8ac_peak_17395 | 8.86099  | SNRNP200_ENSG00000144028                                                 |
| 2 | 96972511 | 96972712 | KD2-H4K8ac_peak_17396 | 6.66692  |                                                                          |
| 2 | 96986630 | 96987213 | KD2-H4K8ac_peak_17397 | 8.10216  | AC021188.4_ENSG00000230747                                               |
| 2 | 96987438 | 96987794 | KD2-H4K8ac_peak_17398 | 6.25869  | AC021188.4_ENSG00000230747                                               |
| 2 | 96990574 | 96990972 | KD2-H4K8ac_peak_17399 | 7.98621  | ITPRIPL1_ENSG00000198885                                                 |
| 2 | 97000992 | 97001413 | KD2-H4K8ac_peak_17400 | 7.76329  | NCAPH_ENSG00000121152                                                    |
| 2 | 97197612 | 97197849 | KD2-H4K8ac_peak_17401 | 9.65086  | RP11-363D14.1_ENSG00000235480                                            |
| 2 | 97303559 | 97303790 | KD2-H4K8ac_peak_17402 | 10.05606 |                                                                          |
| 2 | 97308228 | 97308677 | KD2-H4K8ac_peak_17403 | 5.94347  | KANSL3_ENSG00000114982;FER1L5_ENSG00000249715                            |
| 2 | 97351246 | 97351744 | KD2-H4K8ac_peak_17404 | 8.23274  |                                                                          |
| 2 | 97406382 | 97406782 | KD2-H4K8ac_peak_17405 | 8.5781   | LMAN2L_ENSG00000114988                                                   |
| 2 | 97426036 | 97426370 | KD2-H4K8ac_peak_17406 | 9.06369  | CNNM4_ENSG00000158158                                                    |
| 2 | 97466324 | 97466589 | KD2-H4K8ac_peak_17407 | 6.31143  |                                                                          |
| 2 | 97481501 | 97481737 | KD2-H4K8ac_peak_17408 | 5.75757  | CNNM3_ENSG00000168763                                                    |
| 2 | 97482029 | 97482276 | KD2-H4K8ac_peak_17409 | 14.8083  | CNNM3_ENSG00000168763                                                    |
| 2 | 97523209 | 97523682 | KD2-H4K8ac_peak_17410 | 12.40345 | ANKRD23_ENSG00000163126;ANKRD39_ENSG00000213337                          |
| 2 | 97524312 | 97524607 | KD2-H4K8ac_peak_17411 | 5.75452  | ANKRD23_ENSG00000163126;ANKRD39_ENSG00000213337                          |
| 2 | 97534111 | 97535742 | KD2-H4K8ac_peak_17412 | 18.23876 | SEMA4C_ENSG00000168758                                                   |
| 2 | 97535936 | 97536353 | KD2-H4K8ac_peak_17413 | 9.34195  | SEMA4C_ENSG00000168758                                                   |
| 2 | 97572226 | 97573835 | KD2-H4K8ac_peak_17414 | 9.36516  |                                                                          |
| 2 | 97734142 | 97734390 | KD2-H4K8ac_peak_17415 | 5.25071  |                                                                          |
| 2 | 97751676 | 97751881 | KD2-H4K8ac_peak_17416 | 7.12754  |                                                                          |
| 2 | 97760753 | 97761365 | KD2-H4K8ac_peak_17417 | 14.74047 | FAHD2B_ENSG00000144199                                                   |
| 2 | 97778933 | 97779137 | KD2-H4K8ac_peak_17418 | 9.90914  | ANKRD36_ENSG00000135976                                                  |
| 2 | 98206979 | 98207300 | KD2-H4K8ac_peak_17419 | 8.10216  | ANKRD36B_ENSG00000196912                                                 |
| 2 | 98280012 | 98280306 | KD2-H4K8ac_peak_17420 | 11.89502 | ACTR1B_ENSG00000115073;LINC01125_ENSG00000228486;RNU4-8P_ENSG00000201806 |
| 2 | 98280734 | 98281192 | KD2-H4K8ac_peak_17421 | 11.1952  | ACTR1B_ENSG00000115073;LINC01125_ENSG00000228486;RNU4-8P_ENSG00000201806 |
| 2 | 98326600 | 98326907 | KD2-H4K8ac_peak_17422 | 5.1313   |                                                                          |
| 2 | 98329480 | 98329756 | KD2-H4K8ac_peak_17423 | 5.14125  | ZAP70_ENSG00000115085                                                    |
| 2 | 98329949 | 98330235 | KD2-H4K8ac_peak_17424 | 8.02571  | ZAP70_ENSG00000115085                                                    |
| 2 | 98611884 | 98612636 | KD2-H4K8ac_peak_17425 | 8.55271  | TMEM131_ENSG00000075568                                                  |
| 2 | 98613122 | 98613377 | KD2-H4K8ac_peak_17426 | 4.84206  | TMEM131_ENSG00000075568                                                  |
| 2 | 99060739 | 99061012 | KD2-H4K8ac_peak_17427 | 5.57044  | INPP4A_ENSG00000040933                                                   |
| 2 | 99081980 | 99082188 | KD2-H4K8ac_peak_17428 | 6.75424  |                                                                          |
| 2 | 99224450 | 99225355 | KD2-H4K8ac_peak_17429 | 10.43145 | COA5_ENSG00000183513;UNC50_ENSG00000115446                               |
| 2 | 99347794 | 99348279 | KD2-H4K8ac_peak_17430 | 10.0692  | MGAT4A_ENSG00000071073                                                   |
| 2 | 99422170 | 99422565 | KD2-H4K8ac_peak_17431 | 5.57044  |                                                                          |
| 2 | 99438660 | 99439816 | KD2-H4K8ac_peak_17432 | 10.19949 |                                                                          |

|   |           |          |                       |          |                                                                     |
|---|-----------|----------|-----------------------|----------|---------------------------------------------------------------------|
| 2 | 99528838  | 99529079 | KD2-H4K8ac_peak_17433 | 9.40857  |                                                                     |
| 2 | 99552939  | 99553138 | KD2-H4K8ac_peak_17434 | 6.05809  | KIAA1211L_ENSG00000196872                                           |
| 2 | 99757787  | 99758508 | KD2-H4K8ac_peak_17435 | 11.43353 | C2orf15_ENSG00000241962;C2ORF15_ENSG00000273045                     |
| 2 | 99771101  | 99771324 | KD2-H4K8ac_peak_17436 | 6.85193  | TSGA10_ENSG00000135951;LIPT1_ENSG00000144182;MRPL30_ENSG00000273155 |
| 2 | 99771612  | 99772071 | KD2-H4K8ac_peak_17437 | 4.86324  | TSGA10_ENSG00000135951;LIPT1_ENSG00000144182;MRPL30_ENSG00000273155 |
| 2 | 99954037  | 99954368 | KD2-H4K8ac_peak_17438 | 7.0754   | EIF5B_ENSG00000158417                                               |
| 2 | 100105766 | 1E+08    | KD2-H4K8ac_peak_17439 | 5.54647  | REV1_ENSG00000135945                                                |
| 2 | 100252001 | 1E+08    | KD2-H4K8ac_peak_17440 | 12.08081 |                                                                     |
| 2 | 100261488 | 1E+08    | KD2-H4K8ac_peak_17441 | 9.41046  |                                                                     |
| 2 | 100326487 | 1E+08    | KD2-H4K8ac_peak_17442 | 4.59928  |                                                                     |
| 2 | 100485256 | 1E+08    | KD2-H4K8ac_peak_17443 | 7.27716  |                                                                     |
| 2 | 100496805 | 1E+08    | KD2-H4K8ac_peak_17444 | 6.03693  |                                                                     |
| 2 | 100507003 | 1.01E+08 | KD2-H4K8ac_peak_17445 | 6.94954  |                                                                     |
| 2 | 100602234 | 1.01E+08 | KD2-H4K8ac_peak_17446 | 3.80759  |                                                                     |
| 2 | 100721384 | 1.01E+08 | KD2-H4K8ac_peak_17447 | 18.41184 | AC092667.2_ENSG00000230393                                          |
| 2 | 100754152 | 1.01E+08 | KD2-H4K8ac_peak_17448 | 5.9696   |                                                                     |
| 2 | 100814218 | 1.01E+08 | KD2-H4K8ac_peak_17449 | 5.75757  |                                                                     |
| 2 | 100815011 | 1.01E+08 | KD2-H4K8ac_peak_17450 | 7.51054  |                                                                     |
| 2 | 100859046 | 1.01E+08 | KD2-H4K8ac_peak_17451 | 4.86324  |                                                                     |
| 2 | 101033694 | 1.01E+08 | KD2-H4K8ac_peak_17452 | 9.20193  | CHST10_ENSG00000115526                                              |
| 2 | 101178484 | 1.01E+08 | KD2-H4K8ac_peak_17453 | 10.21502 | PDCL3_ENSG00000115539                                               |
| 2 | 101179463 | 1.01E+08 | KD2-H4K8ac_peak_17454 | 16.32216 | PDCL3_ENSG00000115539                                               |
| 2 | 101610997 | 1.02E+08 | KD2-H4K8ac_peak_17455 | 4.57371  |                                                                     |
| 2 | 101618258 | 1.02E+08 | KD2-H4K8ac_peak_17456 | 24.051   | AC016738.4_ENSG00000223947;RPL31_ENSG00000071082                    |
| 2 | 101618819 | 1.02E+08 | KD2-H4K8ac_peak_17457 | 7.76329  | AC016738.4_ENSG00000223947;RPL31_ENSG00000071082                    |
| 2 | 101726807 | 1.02E+08 | KD2-H4K8ac_peak_17458 | 4.73064  |                                                                     |
| 2 | 101729037 | 1.02E+08 | KD2-H4K8ac_peak_17459 | 7.40111  |                                                                     |
| 2 | 101731918 | 1.02E+08 | KD2-H4K8ac_peak_17460 | 5.54647  |                                                                     |
| 2 | 101768139 | 1.02E+08 | KD2-H4K8ac_peak_17461 | 7.47462  | RP11-299H21.1_ENSG00000272902                                       |
| 2 | 101868797 | 1.02E+08 | KD2-H4K8ac_peak_17462 | 7.12754  | TBC1D8_ENSG00000204634;CNOT11_ENSG00000158435                       |
| 2 | 101869383 | 1.02E+08 | KD2-H4K8ac_peak_17463 | 16.8435  | TBC1D8_ENSG00000204634;CNOT11_ENSG00000158435                       |
| 2 | 101924958 | 1.02E+08 | KD2-H4K8ac_peak_17464 | 10.86378 | MIR5696_ENSG00000264857;RNF149_ENSG00000163162                      |
| 2 | 102090742 | 1.02E+08 | KD2-H4K8ac_peak_17465 | 12.80176 | RFX8_ENSG00000196460                                                |
| 2 | 102112186 | 1.02E+08 | KD2-H4K8ac_peak_17466 | 6.00226  |                                                                     |
| 2 | 102313309 | 1.02E+08 | KD2-H4K8ac_peak_17467 | 15.16343 | MAP4K4_ENSG00000071054                                              |
| 2 | 102314317 | 1.02E+08 | KD2-H4K8ac_peak_17468 | 14.15075 |                                                                     |
| 2 | 102420889 | 1.02E+08 | KD2-H4K8ac_peak_17469 | 9.07071  |                                                                     |
| 2 | 102422950 | 1.02E+08 | KD2-H4K8ac_peak_17470 | 10.63441 |                                                                     |
| 2 | 103353026 | 1.03E+08 | KD2-H4K8ac_peak_17471 | 5.53033  | MFS9_ENSG00000135953;TMEM182_ENSG00000170417                        |
| 2 | 104994972 | 1.05E+08 | KD2-H4K8ac_peak_17472 | 9.59147  |                                                                     |
| 2 | 105305822 | 1.05E+08 | KD2-H4K8ac_peak_17473 | 7.12754  |                                                                     |
| 2 | 105459055 | 1.05E+08 | KD2-H4K8ac_peak_17474 | 7.94441  |                                                                     |
| 2 | 105460145 | 1.05E+08 | KD2-H4K8ac_peak_17475 | 9.6247   |                                                                     |
| 2 | 105460999 | 1.05E+08 | KD2-H4K8ac_peak_17476 | 12.3187  |                                                                     |
| 2 | 105471428 | 1.05E+08 | KD2-H4K8ac_peak_17477 | 10.1591  | POU3F3_ENSG00000198914                                              |
| 2 | 105654644 | 1.06E+08 | KD2-H4K8ac_peak_17478 | 6.36375  | AC010884.1_ENSG00000224509;MRPS9_ENSG00000135972                    |



|   |           |          |                       |          |                                                  |
|---|-----------|----------|-----------------------|----------|--------------------------------------------------|
| 2 | 105759846 | 1.06E+08 | KD2-H4K8ac_peak_17479 | 5.14125  | AC104655.3_ENSG00000226508                       |
| 2 | 105760506 | 1.06E+08 | KD2-H4K8ac_peak_17480 | 16.09057 | AC104655.3_ENSG00000226508                       |
| 2 | 105946218 | 1.06E+08 | KD2-H4K8ac_peak_17481 | 21.11201 | TGFBRAP1_ENSG00000135966                         |
| 2 | 106014859 | 1.06E+08 | KD2-H4K8ac_peak_17482 | 14.69247 |                                                  |
| 2 | 106054783 | 1.06E+08 | KD2-H4K8ac_peak_17483 | 9.96798  | FHL2_ENSG00000115641                             |
| 2 | 106360901 | 1.06E+08 | KD2-H4K8ac_peak_17484 | 14.45402 | NCK2_ENSG00000071051                             |
| 2 | 106681783 | 1.07E+08 | KD2-H4K8ac_peak_17485 | 10.21502 |                                                  |
| 2 | 106747027 | 1.07E+08 | KD2-H4K8ac_peak_17486 | 5.57044  |                                                  |
| 2 | 106809918 | 1.07E+08 | KD2-H4K8ac_peak_17487 | 20.91724 | UXS1_ENSG00000115652                             |
| 2 | 106811013 | 1.07E+08 | KD2-H4K8ac_peak_17488 | 6.66692  | UXS1_ENSG00000115652                             |
| 2 | 107191976 | 1.07E+08 | KD2-H4K8ac_peak_17489 | 6.25869  |                                                  |
| 2 | 107195387 | 1.07E+08 | KD2-H4K8ac_peak_17490 | 4.35346  |                                                  |
| 2 | 107196653 | 1.07E+08 | KD2-H4K8ac_peak_17491 | 11.86082 |                                                  |
| 2 | 107198582 | 1.07E+08 | KD2-H4K8ac_peak_17492 | 6.68439  |                                                  |
| 2 | 107502636 | 1.08E+08 | KD2-H4K8ac_peak_17493 | 8.55271  | ST6GAL2_ENSG00000144057                          |
| 2 | 107503288 | 1.08E+08 | KD2-H4K8ac_peak_17494 | 9.65086  | ST6GAL2_ENSG00000144057                          |
| 2 | 108993763 | 1.09E+08 | KD2-H4K8ac_peak_17495 | 6.05809  | SULT1C4_ENSG00000198075                          |
| 2 | 108994447 | 1.09E+08 | KD2-H4K8ac_peak_17496 | 5.75757  | SULT1C4_ENSG00000198075                          |
| 2 | 109065031 | 1.09E+08 | KD2-H4K8ac_peak_17497 | 16.822   | GCC2_ENSG00000135968                             |
| 2 | 109150390 | 1.09E+08 | KD2-H4K8ac_peak_17498 | 5.38581  | AC012487.2_ENSG00000214184;LIMS1_ENSG00000169756 |
| 2 | 109150897 | 1.09E+08 | KD2-H4K8ac_peak_17499 | 9.96798  | AC012487.2_ENSG00000214184;LIMS1_ENSG00000169756 |
| 2 | 109334824 | 1.09E+08 | KD2-H4K8ac_peak_17500 | 8.94469  | RANBP2_ENSG00000153201                           |
| 2 | 109336043 | 1.09E+08 | KD2-H4K8ac_peak_17501 | 10.53377 | RANBP2_ENSG00000153201                           |
| 2 | 109403294 | 1.09E+08 | KD2-H4K8ac_peak_17502 | 7.01964  | CCDC138_ENSG00000163006                          |
| 2 | 109787306 | 1.1E+08  | KD2-H4K8ac_peak_17503 | 10.25088 |                                                  |
| 2 | 109788353 | 1.1E+08  | KD2-H4K8ac_peak_17504 | 7.76104  |                                                  |
| 2 | 109790326 | 1.1E+08  | KD2-H4K8ac_peak_17505 | 7.11925  |                                                  |
| 2 | 109875315 | 1.1E+08  | KD2-H4K8ac_peak_17506 | 6.34383  |                                                  |
| 2 | 110062959 | 1.1E+08  | KD2-H4K8ac_peak_17507 | 5.75757  |                                                  |
| 2 | 110064368 | 1.1E+08  | KD2-H4K8ac_peak_17508 | 6.44277  |                                                  |
| 2 | 110064792 | 1.1E+08  | KD2-H4K8ac_peak_17509 | 7.44366  |                                                  |
| 2 | 110066539 | 1.1E+08  | KD2-H4K8ac_peak_17510 | 5.58333  |                                                  |
| 2 | 110088633 | 1.1E+08  | KD2-H4K8ac_peak_17511 | 6.40683  |                                                  |
| 2 | 110090240 | 1.1E+08  | KD2-H4K8ac_peak_17512 | 7.40111  |                                                  |
| 2 | 110371995 | 1.1E+08  | KD2-H4K8ac_peak_17513 | 6.67092  | SEPT10_ENSG00000186522;SOWAHC_ENSG00000198142    |
| 2 | 110450036 | 1.1E+08  | KD2-H4K8ac_peak_17514 | 8.17902  |                                                  |
| 2 | 110858230 | 1.11E+08 | KD2-H4K8ac_peak_17515 | 20.88898 |                                                  |
| 2 | 110859385 | 1.11E+08 | KD2-H4K8ac_peak_17516 | 16.8435  |                                                  |
| 2 | 110873225 | 1.11E+08 | KD2-H4K8ac_peak_17517 | 4.42765  | MALL_ENSG00000144063                             |
| 2 | 110962928 | 1.11E+08 | KD2-H4K8ac_peak_17518 | 6.16888  | NPHP1_ENSG00000144061                            |
| 2 | 110969758 | 1.11E+08 | KD2-H4K8ac_peak_17519 | 11.86082 |                                                  |
| 2 | 111435867 | 1.11E+08 | KD2-H4K8ac_peak_17520 | 3.97079  | BUB1_ENSG00000169679                             |
| 2 | 111527561 | 1.12E+08 | KD2-H4K8ac_peak_17521 | 10.05606 |                                                  |
| 2 | 111627189 | 1.12E+08 | KD2-H4K8ac_peak_17522 | 7.79898  |                                                  |
| 2 | 111660113 | 1.12E+08 | KD2-H4K8ac_peak_17523 | 4.67342  |                                                  |
| 2 | 111877649 | 1.12E+08 | KD2-H4K8ac_peak_17524 | 14.275   | BCL2L11_ENSG00000153094                          |

|   |           |          |                       |          |                                                     |
|---|-----------|----------|-----------------------|----------|-----------------------------------------------------|
| 2 | 112022191 | 1.12E+08 | KD2-H4K8ac_peak_17525 | 5.88845  | AC068491.2_ENSG00000229118                          |
| 2 | 112069834 | 1.12E+08 | KD2-H4K8ac_peak_17526 | 8.1233   |                                                     |
| 2 | 112070638 | 1.12E+08 | KD2-H4K8ac_peak_17527 | 7.27716  |                                                     |
| 2 | 112073272 | 1.12E+08 | KD2-H4K8ac_peak_17528 | 7.12754  |                                                     |
| 2 | 112112971 | 1.12E+08 | KD2-H4K8ac_peak_17529 | 19.6416  |                                                     |
| 2 | 112123760 | 1.12E+08 | KD2-H4K8ac_peak_17530 | 10.72656 |                                                     |
| 2 | 112221216 | 1.12E+08 | KD2-H4K8ac_peak_17531 | 6.16888  |                                                     |
| 2 | 112271121 | 1.12E+08 | KD2-H4K8ac_peak_17532 | 5.57044  |                                                     |
| 2 | 112280658 | 1.12E+08 | KD2-H4K8ac_peak_17533 | 8.30974  |                                                     |
| 2 | 112283796 | 1.12E+08 | KD2-H4K8ac_peak_17534 | 6.79289  |                                                     |
| 2 | 112293171 | 1.12E+08 | KD2-H4K8ac_peak_17535 | 5.25071  |                                                     |
| 2 | 112641408 | 1.13E+08 | KD2-H4K8ac_peak_17536 | 6.99194  | ANAPC1_ENSG00000153107                              |
| 2 | 112655606 | 1.13E+08 | KD2-H4K8ac_peak_17537 | 9.36516  | MERTK_ENSG00000153208                               |
| 2 | 112676540 | 1.13E+08 | KD2-H4K8ac_peak_17538 | 5.10505  |                                                     |
| 2 | 112732009 | 1.13E+08 | KD2-H4K8ac_peak_17539 | 4.01115  |                                                     |
| 2 | 113011968 | 1.13E+08 | KD2-H4K8ac_peak_17540 | 5.88845  | ZC3H8_ENSG00000144161                               |
| 2 | 113012830 | 1.13E+08 | KD2-H4K8ac_peak_17541 | 9.11031  | ZC3H8_ENSG00000144161                               |
| 2 | 113017473 | 1.13E+08 | KD2-H4K8ac_peak_17542 | 9.80695  |                                                     |
| 2 | 113033219 | 1.13E+08 | KD2-H4K8ac_peak_17543 | 15.69572 | ZC3H6_ENSG00000188177                               |
| 2 | 113238982 | 1.13E+08 | KD2-H4K8ac_peak_17544 | 16.40694 | TTL_ENSG00000114999                                 |
| 2 | 113299491 | 1.13E+08 | KD2-H4K8ac_peak_17545 | 12.36441 | POLR1B_ENSG00000125630                              |
| 2 | 113341511 | 1.13E+08 | KD2-H4K8ac_peak_17546 | 10.7186  | CHCHD5_ENSG00000125611                              |
| 2 | 113342642 | 1.13E+08 | KD2-H4K8ac_peak_17547 | 9.34989  | CHCHD5_ENSG00000125611                              |
| 2 | 113357250 | 1.13E+08 | KD2-H4K8ac_peak_17548 | 6.57893  |                                                     |
| 2 | 113383911 | 1.13E+08 | KD2-H4K8ac_peak_17549 | 16.61426 |                                                     |
| 2 | 113403563 | 1.13E+08 | KD2-H4K8ac_peak_17550 | 6.40297  | AC079922.3_ENSG00000237753;SLC20A1_ENSG00000144136  |
| 2 | 113484022 | 1.13E+08 | KD2-H4K8ac_peak_17551 | 10.19949 |                                                     |
| 2 | 113956978 | 1.14E+08 | KD2-H4K8ac_peak_17552 | 5.51783  |                                                     |
| 2 | 114082908 | 1.14E+08 | KD2-H4K8ac_peak_17553 | 5.25071  |                                                     |
| 2 | 114341192 | 1.14E+08 | KD2-H4K8ac_peak_17554 | 42.89502 | MIR1302-3_ENSG00000221055;WASH2P_ENSG00000146556    |
| 2 | 114341942 | 1.14E+08 | KD2-H4K8ac_peak_17555 | 13.57066 | WASH2P_ENSG00000146556                              |
| 2 | 114646682 | 1.15E+08 | KD2-H4K8ac_peak_17556 | 11.30637 | RP11-141B14.1_ENSG00000270019;ACTR3_ENSG00000115091 |
| 2 | 114647707 | 1.15E+08 | KD2-H4K8ac_peak_17557 | 8.17902  | RP11-141B14.1_ENSG00000270019;ACTR3_ENSG00000115091 |
| 2 | 117511901 | 1.18E+08 | KD2-H4K8ac_peak_17558 | 8.30974  |                                                     |
| 2 | 118449543 | 1.18E+08 | KD2-H4K8ac_peak_17559 | 4.86324  |                                                     |
| 2 | 118470459 | 1.18E+08 | KD2-H4K8ac_peak_17560 | 8.74596  |                                                     |
| 2 | 118472370 | 1.18E+08 | KD2-H4K8ac_peak_17561 | 6.4095   |                                                     |
| 2 | 118476297 | 1.18E+08 | KD2-H4K8ac_peak_17562 | 5.75452  |                                                     |
| 2 | 118477866 | 1.18E+08 | KD2-H4K8ac_peak_17563 | 13.09607 |                                                     |
| 2 | 118529426 | 1.19E+08 | KD2-H4K8ac_peak_17564 | 4.01115  |                                                     |
| 2 | 118530171 | 1.19E+08 | KD2-H4K8ac_peak_17565 | 10.0746  |                                                     |
| 2 | 118760298 | 1.19E+08 | KD2-H4K8ac_peak_17566 | 10.21502 |                                                     |
| 2 | 118771268 | 1.19E+08 | KD2-H4K8ac_peak_17567 | 8.59579  | CCDC93_ENSG00000125633                              |
| 2 | 118771866 | 1.19E+08 | KD2-H4K8ac_peak_17568 | 10.21502 | CCDC93_ENSG00000125633                              |
| 2 | 118900286 | 1.19E+08 | KD2-H4K8ac_peak_17569 | 8.1233   |                                                     |
| 2 | 118943267 | 1.19E+08 | KD2-H4K8ac_peak_17570 | 10.96455 | AC093901.1_ENSG00000226856                          |

|   |           |          |                       |          |                                                             |
|---|-----------|----------|-----------------------|----------|-------------------------------------------------------------|
| 2 | 118944122 | 1.19E+08 | KD2-H4K8ac_peak_17571 | 5.75757  | AC093901.1_ENSG00000226856                                  |
| 2 | 119427668 | 1.19E+08 | KD2-H4K8ac_peak_17572 | 5.57044  |                                                             |
| 2 | 119981061 | 1.2E+08  | KD2-H4K8ac_peak_17573 | 6.65673  | STEAP3_ENSG00000115107                                      |
| 2 | 119998225 | 1.2E+08  | KD2-H4K8ac_peak_17574 | 8.26945  |                                                             |
| 2 | 120124027 | 1.2E+08  | KD2-H4K8ac_peak_17575 | 5.00278  | C2orf76_ENSG00000186132;DBI_ENSG00000155368                 |
| 2 | 120188953 | 1.2E+08  | KD2-H4K8ac_peak_17576 | 10.05606 |                                                             |
| 2 | 120234209 | 1.2E+08  | KD2-H4K8ac_peak_17577 | 5.3778   | AC013275.2_ENSG00000231013                                  |
| 2 | 120242400 | 1.2E+08  | KD2-H4K8ac_peak_17578 | 6.98302  |                                                             |
| 2 | 120302093 | 1.2E+08  | KD2-H4K8ac_peak_17579 | 8.30974  | PCDPI1_ENSG00000163075                                      |
| 2 | 120436804 | 1.2E+08  | KD2-H4K8ac_peak_17580 | 9.11031  | TMEM177_ENSG00000144120                                     |
| 2 | 120517568 | 1.21E+08 | KD2-H4K8ac_peak_17581 | 7.27716  | PTPN4_ENSG00000088179                                       |
| 2 | 120980421 | 1.21E+08 | KD2-H4K8ac_peak_17582 | 15.58442 | TMEM185B_ENSG00000226479                                    |
| 2 | 121009842 | 1.21E+08 | KD2-H4K8ac_peak_17583 | 5.88845  |                                                             |
| 2 | 121010555 | 1.21E+08 | KD2-H4K8ac_peak_17584 | 9.36516  |                                                             |
| 2 | 121199411 | 1.21E+08 | KD2-H4K8ac_peak_17585 | 4.211    |                                                             |
| 2 | 121200078 | 1.21E+08 | KD2-H4K8ac_peak_17586 | 6.8836   |                                                             |
| 2 | 121334205 | 1.21E+08 | KD2-H4K8ac_peak_17587 | 8.10216  |                                                             |
| 2 | 121492739 | 1.21E+08 | KD2-H4K8ac_peak_17588 | 9.72244  |                                                             |
| 2 | 121499194 | 1.21E+08 | KD2-H4K8ac_peak_17589 | 17.42905 |                                                             |
| 2 | 121578107 | 1.22E+08 | KD2-H4K8ac_peak_17590 | 6.36375  |                                                             |
| 2 | 121662832 | 1.22E+08 | KD2-H4K8ac_peak_17591 | 10.05081 |                                                             |
| 2 | 121673584 | 1.22E+08 | KD2-H4K8ac_peak_17592 | 6.4562   |                                                             |
| 2 | 122003532 | 1.22E+08 | KD2-H4K8ac_peak_17593 | 4.59912  |                                                             |
| 2 | 122287771 | 1.22E+08 | KD2-H4K8ac_peak_17594 | 6.60096  | RP11-204L24.2_ENSG00000265451;RNU4ATAC_ENSG00000264229      |
| 2 | 122364597 | 1.22E+08 | KD2-H4K8ac_peak_17595 | 7.76329  |                                                             |
| 2 | 122406542 | 1.22E+08 | KD2-H4K8ac_peak_17596 | 7.76104  | CLASPI1_ENSG00000074054;NIFK-AS1_ENSG00000236859            |
| 2 | 122407393 | 1.22E+08 | KD2-H4K8ac_peak_17597 | 6.66692  | CLASPI1_ENSG00000074054;NIFK-AS1_ENSG00000236859            |
| 2 | 122494115 | 1.22E+08 | KD2-H4K8ac_peak_17598 | 9.63487  | NIFK_ENSG00000155438;TSN_ENSG00000211460                    |
| 2 | 122495024 | 1.22E+08 | KD2-H4K8ac_peak_17599 | 13.81781 | NIFK_ENSG00000155438;TSN_ENSG00000211460                    |
| 2 | 122513271 | 1.23E+08 | KD2-H4K8ac_peak_17600 | 10.96455 |                                                             |
| 2 | 122529174 | 1.23E+08 | KD2-H4K8ac_peak_17601 | 8.37231  |                                                             |
| 2 | 122530086 | 1.23E+08 | KD2-H4K8ac_peak_17602 | 7.79898  |                                                             |
| 2 | 122532114 | 1.23E+08 | KD2-H4K8ac_peak_17603 | 5.61067  |                                                             |
| 2 | 125065065 | 1.25E+08 | KD2-H4K8ac_peak_17604 | 7.47462  |                                                             |
| 2 | 125072646 | 1.25E+08 | KD2-H4K8ac_peak_17605 | 7.22457  |                                                             |
| 2 | 125074933 | 1.25E+08 | KD2-H4K8ac_peak_17606 | 8.74596  |                                                             |
| 2 | 125076424 | 1.25E+08 | KD2-H4K8ac_peak_17607 | 8.37043  |                                                             |
| 2 | 125083639 | 1.25E+08 | KD2-H4K8ac_peak_17608 | 5.15777  |                                                             |
| 2 | 125161482 | 1.25E+08 | KD2-H4K8ac_peak_17609 | 6.16888  |                                                             |
| 2 | 127534483 | 1.28E+08 | KD2-H4K8ac_peak_17610 | 4.42498  |                                                             |
| 2 | 127615180 | 1.28E+08 | KD2-H4K8ac_peak_17611 | 6.00226  |                                                             |
| 2 | 127615986 | 1.28E+08 | KD2-H4K8ac_peak_17612 | 7.18916  |                                                             |
| 2 | 127704191 | 1.28E+08 | KD2-H4K8ac_peak_17613 | 5.57044  |                                                             |
| 2 | 127729392 | 1.28E+08 | KD2-H4K8ac_peak_17614 | 3.90565  |                                                             |
| 2 | 127733913 | 1.28E+08 | KD2-H4K8ac_peak_17615 | 5.9696   |                                                             |
| 2 | 127782680 | 1.28E+08 | KD2-H4K8ac_peak_17616 | 11.28831 | RP11-521O16.1_ENSG00000260634;RP11-521O16.2_ENSG00000260163 |

|   |           |          |                       |          |                                                        |
|---|-----------|----------|-----------------------|----------|--------------------------------------------------------|
| 2 | 127807446 | 1.28E+08 | KD2-H4K8ac_peak_17617 | 10.01478 |                                                        |
| 2 | 127844766 | 1.28E+08 | KD2-H4K8ac_peak_17618 | 10.19949 |                                                        |
| 2 | 127863245 | 1.28E+08 | KD2-H4K8ac_peak_17619 | 5.26288  | BIN1_ENSG00000136717                                   |
| 2 | 127864810 | 1.28E+08 | KD2-H4K8ac_peak_17620 | 4.14655  | BIN1_ENSG00000136717                                   |
| 2 | 127976254 | 1.28E+08 | KD2-H4K8ac_peak_17621 | 5.92591  |                                                        |
| 2 | 127976723 | 1.28E+08 | KD2-H4K8ac_peak_17622 | 8.85813  | CYP27C1_ENSG00000186684                                |
| 2 | 127977511 | 1.28E+08 | KD2-H4K8ac_peak_17623 | 16.8435  | CYP27C1_ENSG00000186684                                |
| 2 | 128051348 | 1.28E+08 | KD2-H4K8ac_peak_17624 | 14.56955 | ERCC3_ENSG00000163161                                  |
| 2 | 128052011 | 1.28E+08 | KD2-H4K8ac_peak_17625 | 9.47671  | ERCC3_ENSG00000163161                                  |
| 2 | 128145077 | 1.28E+08 | KD2-H4K8ac_peak_17626 | 26.96144 | MAP3K2_ENSG00000169967                                 |
| 2 | 128145760 | 1.28E+08 | KD2-H4K8ac_peak_17627 | 14.15075 | MAP3K2_ENSG00000169967;AC068282.3_ENSG00000236682      |
| 2 | 128165723 | 1.28E+08 | KD2-H4K8ac_peak_17628 | 15.22643 |                                                        |
| 2 | 128283654 | 1.28E+08 | KD2-H4K8ac_peak_17629 | 11.02863 | IWS1_ENSG00000163166                                   |
| 2 | 128334370 | 1.28E+08 | KD2-H4K8ac_peak_17630 | 4.42765  |                                                        |
| 2 | 128391901 | 1.28E+08 | KD2-H4K8ac_peak_17631 | 4.44923  |                                                        |
| 2 | 128406936 | 1.28E+08 | KD2-H4K8ac_peak_17632 | 9.08816  |                                                        |
| 2 | 128409007 | 1.28E+08 | KD2-H4K8ac_peak_17633 | 11.92978 |                                                        |
| 2 | 128410308 | 1.28E+08 | KD2-H4K8ac_peak_17634 | 5.59859  |                                                        |
| 2 | 128432293 | 1.28E+08 | KD2-H4K8ac_peak_17635 | 6.25869  |                                                        |
| 2 | 128453132 | 1.28E+08 | KD2-H4K8ac_peak_17636 | 6.25869  |                                                        |
| 2 | 128458101 | 1.28E+08 | KD2-H4K8ac_peak_17637 | 8.59301  | SFT2D3_ENSG00000173349                                 |
| 2 | 128459113 | 1.28E+08 | KD2-H4K8ac_peak_17638 | 9.95342  | SFT2D3_ENSG00000173349                                 |
| 2 | 128568469 | 1.29E+08 | KD2-H4K8ac_peak_17639 | 14.27217 | WDR33_ENSG00000136709                                  |
| 2 | 128568922 | 1.29E+08 | KD2-H4K8ac_peak_17640 | 15.59774 | WDR33_ENSG00000136709                                  |
| 2 | 128615329 | 1.29E+08 | KD2-H4K8ac_peak_17641 | 12.25733 | POLR2D_ENSG00000144231                                 |
| 2 | 128643257 | 1.29E+08 | KD2-H4K8ac_peak_17642 | 6.31143  | AMMECR1L_ENSG00000144233;RP11-395A13.2_ENSG00000272667 |
| 2 | 128643963 | 1.29E+08 | KD2-H4K8ac_peak_17643 | 5.9696   | AMMECR1L_ENSG00000144233;RP11-395A13.2_ENSG00000272667 |
| 2 | 128785398 | 1.29E+08 | KD2-H4K8ac_peak_17644 | 5.01002  | SAP130_ENSG00000136715                                 |
| 2 | 128786072 | 1.29E+08 | KD2-H4K8ac_peak_17645 | 5.75452  | SAP130_ENSG00000136715                                 |
| 2 | 128990858 | 1.29E+08 | KD2-H4K8ac_peak_17646 | 14.12659 |                                                        |
| 2 | 129040008 | 1.29E+08 | KD2-H4K8ac_peak_17647 | 8.66368  |                                                        |
| 2 | 129076765 | 1.29E+08 | KD2-H4K8ac_peak_17648 | 9.89383  | HS6ST1_ENSG00000136720                                 |
| 2 | 129079641 | 1.29E+08 | KD2-H4K8ac_peak_17649 | 20.18381 |                                                        |
| 2 | 129105277 | 1.29E+08 | KD2-H4K8ac_peak_17650 | 6.99815  |                                                        |
| 2 | 129136227 | 1.29E+08 | KD2-H4K8ac_peak_17651 | 6.25869  |                                                        |
| 2 | 129137399 | 1.29E+08 | KD2-H4K8ac_peak_17652 | 5.34636  |                                                        |
| 2 | 129147985 | 1.29E+08 | KD2-H4K8ac_peak_17653 | 4.06722  |                                                        |
| 2 | 129164844 | 1.29E+08 | KD2-H4K8ac_peak_17654 | 3.97079  |                                                        |
| 2 | 129170804 | 1.29E+08 | KD2-H4K8ac_peak_17655 | 5.72327  |                                                        |
| 2 | 129179029 | 1.29E+08 | KD2-H4K8ac_peak_17656 | 6.60096  |                                                        |
| 2 | 129180763 | 1.29E+08 | KD2-H4K8ac_peak_17657 | 11.1952  |                                                        |
| 2 | 129182805 | 1.29E+08 | KD2-H4K8ac_peak_17658 | 13.88933 |                                                        |
| 2 | 129198546 | 1.29E+08 | KD2-H4K8ac_peak_17659 | 11.56469 |                                                        |
| 2 | 129206342 | 1.29E+08 | KD2-H4K8ac_peak_17660 | 5.9696   |                                                        |
| 2 | 129206780 | 1.29E+08 | KD2-H4K8ac_peak_17661 | 13.73635 |                                                        |
| 2 | 129208680 | 1.29E+08 | KD2-H4K8ac_peak_17662 | 13.22195 |                                                        |

|   |           |          |                       |          |                                                                          |
|---|-----------|----------|-----------------------|----------|--------------------------------------------------------------------------|
| 2 | 129215392 | 1.29E+08 | KD2-H4K8ac_peak_17663 | 6.34383  |                                                                          |
| 2 | 129252552 | 1.29E+08 | KD2-H4K8ac_peak_17664 | 6.36375  |                                                                          |
| 2 | 129381396 | 1.29E+08 | KD2-H4K8ac_peak_17665 | 10.21502 |                                                                          |
| 2 | 129382232 | 1.29E+08 | KD2-H4K8ac_peak_17666 | 9.15329  |                                                                          |
| 2 | 129494558 | 1.29E+08 | KD2-H4K8ac_peak_17667 | 6.40297  |                                                                          |
| 2 | 130566211 | 1.31E+08 | KD2-H4K8ac_peak_17668 | 8.53581  |                                                                          |
| 2 | 130635603 | 1.31E+08 | KD2-H4K8ac_peak_17669 | 15.00387 | AC079776.1_ENSG00000229536                                               |
| 2 | 130687172 | 1.31E+08 | KD2-H4K8ac_peak_17670 | 5.00796  |                                                                          |
| 2 | 130713350 | 1.31E+08 | KD2-H4K8ac_peak_17671 | 7.44324  |                                                                          |
| 2 | 130938780 | 1.31E+08 | KD2-H4K8ac_peak_17672 | 7.07117  | MZT2B_ENSG00000152082                                                    |
| 2 | 130939540 | 1.31E+08 | KD2-H4K8ac_peak_17673 | 10.43145 | MZT2B_ENSG00000152082;SMPD4_ENSG00000136699;AC018804.1_ENSG00000265280   |
| 2 | 130940418 | 1.31E+08 | KD2-H4K8ac_peak_17674 | 10.87093 | SMPD4_ENSG00000136699;AC018804.1_ENSG00000265280                         |
| 2 | 130941575 | 1.31E+08 | KD2-H4K8ac_peak_17675 | 6.99815  | AC018804.1_ENSG00000265280                                               |
| 2 | 131099177 | 1.31E+08 | KD2-H4K8ac_peak_17676 | 9.1707   | CCDC115_ENSG00000136710;IMP4_ENSG00000136718                             |
| 2 | 131113658 | 1.31E+08 | KD2-H4K8ac_peak_17677 | 12.93209 | PTPN18_ENSG00000072135                                                   |
| 2 | 131128805 | 1.31E+08 | KD2-H4K8ac_peak_17678 | 5.4779   |                                                                          |
| 2 | 131130304 | 1.31E+08 | KD2-H4K8ac_peak_17679 | 6.84261  |                                                                          |
| 2 | 131149017 | 1.31E+08 | KD2-H4K8ac_peak_17680 | 12.93253 |                                                                          |
| 2 | 131484157 | 1.31E+08 | KD2-H4K8ac_peak_17681 | 11.05467 |                                                                          |
| 2 | 131485475 | 1.31E+08 | KD2-H4K8ac_peak_17682 | 9.51625  | GPR148_ENSG00000173302                                                   |
| 2 | 131502479 | 1.32E+08 | KD2-H4K8ac_peak_17683 | 9.1707   |                                                                          |
| 2 | 131513938 | 1.32E+08 | KD2-H4K8ac_peak_17684 | 5.30799  | AMER3_ENSG00000178171;AC140481.8_ENSG00000229797                         |
| 2 | 131576925 | 1.32E+08 | KD2-H4K8ac_peak_17685 | 6.2781   |                                                                          |
| 2 | 131792488 | 1.32E+08 | KD2-H4K8ac_peak_17686 | 10.19949 |                                                                          |
| 2 | 131850523 | 1.32E+08 | KD2-H4K8ac_peak_17687 | 12.23    | FAM168B_ENSG00000152102                                                  |
| 2 | 131861553 | 1.32E+08 | KD2-H4K8ac_peak_17688 | 8.41122  | PLEKHB2_ENSG00000115762                                                  |
| 2 | 131862089 | 1.32E+08 | KD2-H4K8ac_peak_17689 | 5.61067  | PLEKHB2_ENSG00000115762                                                  |
| 2 | 131863082 | 1.32E+08 | KD2-H4K8ac_peak_17690 | 6.24114  | PLEKHB2_ENSG00000115762                                                  |
| 2 | 132182934 | 1.32E+08 | KD2-H4K8ac_peak_17691 | 5.13341  | GNAQP1_ENSG00000214077                                                   |
| 2 | 132249579 | 1.32E+08 | KD2-H4K8ac_peak_17692 | 22.21705 | MZT2A_ENSG00000173272;MIR4784_ENSG00000265575;AC093838.4_ENSG00000152117 |
| 2 | 132250527 | 1.32E+08 | KD2-H4K8ac_peak_17693 | 8.85813  | MZT2A_ENSG00000173272;AC093838.4_ENSG00000152117                         |
| 2 | 132285137 | 1.32E+08 | KD2-H4K8ac_peak_17694 | 7.40111  | CCDC74A_ENSG00000163040                                                  |
| 2 | 132290299 | 1.32E+08 | KD2-H4K8ac_peak_17695 | 5.4779   |                                                                          |
| 2 | 132291485 | 1.32E+08 | KD2-H4K8ac_peak_17696 | 8.7325   |                                                                          |
| 2 | 132439461 | 1.32E+08 | KD2-H4K8ac_peak_17697 | 14.06758 |                                                                          |
| 2 | 132559166 | 1.33E+08 | KD2-H4K8ac_peak_17698 | 8.5092   | C2orf27B_ENSG00000186825                                                 |
| 2 | 133104143 | 1.33E+08 | KD2-H4K8ac_peak_17699 | 6.36375  | RP11-725P16.2_ENSG00000272769                                            |
| 2 | 133105087 | 1.33E+08 | KD2-H4K8ac_peak_17700 | 22.92795 | RP11-725P16.2_ENSG00000272769                                            |
| 2 | 133110362 | 1.33E+08 | KD2-H4K8ac_peak_17701 | 20.61349 | FAM201B_ENSG00000230992                                                  |
| 2 | 134023055 | 1.34E+08 | KD2-H4K8ac_peak_17702 | 13.73635 | AC010890.1_ENSG00000226953                                               |
| 2 | 134357234 | 1.34E+08 | KD2-H4K8ac_peak_17703 | 9.15329  |                                                                          |
| 2 | 134469903 | 1.34E+08 | KD2-H4K8ac_peak_17704 | 14.45402 |                                                                          |
| 2 | 134534592 | 1.35E+08 | KD2-H4K8ac_peak_17705 | 5.25071  |                                                                          |
| 2 | 134877952 | 1.35E+08 | KD2-H4K8ac_peak_17706 | 11.09936 | MGAT5_ENSG00000152127                                                    |
| 2 | 134878857 | 1.35E+08 | KD2-H4K8ac_peak_17707 | 5.54647  |                                                                          |
| 2 | 134935362 | 1.35E+08 | KD2-H4K8ac_peak_17708 | 10.21502 |                                                                          |

|   |           |          |                       |          |                                                   |
|---|-----------|----------|-----------------------|----------|---------------------------------------------------|
| 2 | 135092596 | 1.35E+08 | KD2-H4K8ac_peak_17709 | 4.12757  |                                                   |
| 2 | 135168576 | 1.35E+08 | KD2-H4K8ac_peak_17710 | 6.40683  |                                                   |
| 2 | 135169404 | 1.35E+08 | KD2-H4K8ac_peak_17711 | 9.5456   |                                                   |
| 2 | 135257046 | 1.35E+08 | KD2-H4K8ac_peak_17712 | 6.90458  |                                                   |
| 2 | 135279705 | 1.35E+08 | KD2-H4K8ac_peak_17713 | 4.06758  |                                                   |
| 2 | 135281158 | 1.35E+08 | KD2-H4K8ac_peak_17714 | 5.7068   |                                                   |
| 2 | 135332302 | 1.35E+08 | KD2-H4K8ac_peak_17715 | 7.12754  |                                                   |
| 2 | 135675485 | 1.36E+08 | KD2-H4K8ac_peak_17716 | 5.23853  | CCNT2-AS1_ENSG00000224043;CCNT2_ENSG00000082258   |
| 2 | 135676503 | 1.36E+08 | KD2-H4K8ac_peak_17717 | 4.37809  | CCNT2-AS1_ENSG00000224043;CCNT2_ENSG00000082258   |
| 2 | 135810038 | 1.36E+08 | KD2-H4K8ac_peak_17718 | 11.05407 | RAB3GAP1_ENSG00000115839                          |
| 2 | 136499516 | 1.37E+08 | KD2-H4K8ac_peak_17719 | 7.36799  | UBXN4_ENSG00000144224                             |
| 2 | 136633514 | 1.37E+08 | KD2-H4K8ac_peak_17720 | 7.12754  | MCM6_ENSG00000076003                              |
| 2 | 136742772 | 1.37E+08 | KD2-H4K8ac_peak_17721 | 19.51835 | DARS_ENSG00000115866;AC093391.2_ENSG00000231890   |
| 2 | 136743341 | 1.37E+08 | KD2-H4K8ac_peak_17722 | 8.55271  | DARS_ENSG00000115866;AC093391.2_ENSG00000231890   |
| 2 | 136824978 | 1.37E+08 | KD2-H4K8ac_peak_17723 | 3.74443  |                                                   |
| 2 | 139258707 | 1.39E+08 | KD2-H4K8ac_peak_17724 | 9.34195  | AC097721.2_ENSG00000228043;SPOPL_ENSG00000144228  |
| 2 | 142888819 | 1.43E+08 | KD2-H4K8ac_peak_17725 | 4.86324  | LRP1B_ENSG00000168702                             |
| 2 | 144459103 | 1.44E+08 | KD2-H4K8ac_peak_17726 | 4.77079  |                                                   |
| 2 | 144694416 | 1.45E+08 | KD2-H4K8ac_peak_17727 | 9.63487  | AC016910.1_ENSG00000232377                        |
| 2 | 145089346 | 1.45E+08 | KD2-H4K8ac_peak_17728 | 13.57066 | GTDC1_ENSG00000121964                             |
| 2 | 145218998 | 1.45E+08 | KD2-H4K8ac_peak_17729 | 7.48133  |                                                   |
| 2 | 145273415 | 1.45E+08 | KD2-H4K8ac_peak_17730 | 15.22643 |                                                   |
| 2 | 145274200 | 1.45E+08 | KD2-H4K8ac_peak_17731 | 9.63487  | ZEB2-AS1_ENSG00000238057                          |
| 2 | 145280471 | 1.45E+08 | KD2-H4K8ac_peak_17732 | 8.30974  | ZEB2_ENSG00000169554                              |
| 2 | 148601454 | 1.49E+08 | KD2-H4K8ac_peak_17733 | 27.41885 | ACV2A_ENSG00000121989                             |
| 2 | 149401885 | 1.49E+08 | KD2-H4K8ac_peak_17734 | 15.66774 | EPC2_ENSG00000135999                              |
| 2 | 149423649 | 1.49E+08 | KD2-H4K8ac_peak_17735 | 4.49837  |                                                   |
| 2 | 149632029 | 1.5E+08  | KD2-H4K8ac_peak_17736 | 4.86324  | KIF5C_ENSG00000168280                             |
| 2 | 149632844 | 1.5E+08  | KD2-H4K8ac_peak_17737 | 13.92307 | KIF5C_ENSG00000168280                             |
| 2 | 149633830 | 1.5E+08  | KD2-H4K8ac_peak_17738 | 5.54647  |                                                   |
| 2 | 149640803 | 1.5E+08  | KD2-H4K8ac_peak_17739 | 6.40683  |                                                   |
| 2 | 149894996 | 1.5E+08  | KD2-H4K8ac_peak_17740 | 8.30974  | LYPD6B_ENSG00000150556                            |
| 2 | 150187123 | 1.5E+08  | KD2-H4K8ac_peak_17741 | 8.88082  | LYPD6_ENSG00000187123                             |
| 2 | 150443951 | 1.5E+08  | KD2-H4K8ac_peak_17742 | 6.55628  | MMADHC_ENSG00000168288;AC144449.1_ENSG00000231969 |
| 2 | 151184197 | 1.51E+08 | KD2-H4K8ac_peak_17743 | 8.17902  |                                                   |
| 2 | 151342747 | 1.51E+08 | KD2-H4K8ac_peak_17744 | 8.5092   |                                                   |
| 2 | 151669780 | 1.52E+08 | KD2-H4K8ac_peak_17745 | 8.55271  |                                                   |
| 2 | 151733180 | 1.52E+08 | KD2-H4K8ac_peak_17746 | 6.40683  |                                                   |
| 2 | 151741370 | 1.52E+08 | KD2-H4K8ac_peak_17747 | 8.5781   |                                                   |
| 2 | 151743412 | 1.52E+08 | KD2-H4K8ac_peak_17748 | 3.75035  |                                                   |
| 2 | 151770849 | 1.52E+08 | KD2-H4K8ac_peak_17749 | 4.37708  |                                                   |
| 2 | 151838690 | 1.52E+08 | KD2-H4K8ac_peak_17750 | 7.15405  | AC023469.2_ENSG00000228064                        |
| 2 | 151853013 | 1.52E+08 | KD2-H4K8ac_peak_17751 | 16.86926 |                                                   |
| 2 | 152094945 | 1.52E+08 | KD2-H4K8ac_peak_17752 | 5.73839  |                                                   |
| 2 | 152117579 | 1.52E+08 | KD2-H4K8ac_peak_17753 | 14.43794 | RBM43_ENSG00000184898                             |
| 2 | 152266509 | 1.52E+08 | KD2-H4K8ac_peak_17754 | 8.59579  | RIF1_ENSG00000080345                              |

|   |           |          |                       |          |                                                                         |
|---|-----------|----------|-----------------------|----------|-------------------------------------------------------------------------|
| 2 | 152684528 | 1.53E+08 | KD2-H4K8ac_peak_17755 | 7.76329  | ARL5A_ENSG00000162980                                                   |
| 2 | 152955431 | 1.53E+08 | KD2-H4K8ac_peak_17756 | 10.0692  | CACNB4_ENSG00000182389;AC079790.2_ENSG00000225214                       |
| 2 | 153031780 | 1.53E+08 | KD2-H4K8ac_peak_17757 | 6.65673  | STAM2_ENSG00000115145                                                   |
| 2 | 153191766 | 1.53E+08 | KD2-H4K8ac_peak_17758 | 10.05606 | FMNL2_ENSG00000157827                                                   |
| 2 | 153573417 | 1.54E+08 | KD2-H4K8ac_peak_17759 | 10.08707 | PRPF40A_ENSG00000196504;ARL6IP6_ENSG00000177917                         |
| 2 | 153574204 | 1.54E+08 | KD2-H4K8ac_peak_17760 | 9.048    | PRPF40A_ENSG00000196504;ARL6IP6_ENSG00000177917                         |
| 2 | 154078407 | 1.54E+08 | KD2-H4K8ac_peak_17761 | 6.66359  |                                                                         |
| 2 | 154727948 | 1.55E+08 | KD2-H4K8ac_peak_17762 | 8.10216  | GALNT13_ENSG00000144278                                                 |
| 2 | 154728501 | 1.55E+08 | KD2-H4K8ac_peak_17763 | 10.53596 | GALNT13_ENSG00000144278                                                 |
| 2 | 154985809 | 1.55E+08 | KD2-H4K8ac_peak_17764 | 5.25071  |                                                                         |
| 2 | 154986370 | 1.55E+08 | KD2-H4K8ac_peak_17765 | 6.8836   |                                                                         |
| 2 | 155163466 | 1.55E+08 | KD2-H4K8ac_peak_17766 | 6.16888  |                                                                         |
| 2 | 155553851 | 1.56E+08 | KD2-H4K8ac_peak_17767 | 6.85193  | AC061961.2_ENSG00000235949;KCNJ3_ENSG00000162989                        |
| 2 | 157292086 | 1.57E+08 | KD2-H4K8ac_peak_17768 | 15.40367 | GPD2_ENSG00000115159                                                    |
| 2 | 158485438 | 1.58E+08 | KD2-H4K8ac_peak_17769 | 9.11031  | ACVR1C_ENSG00000123612                                                  |
| 2 | 158694192 | 1.59E+08 | KD2-H4K8ac_peak_17770 | 4.77079  |                                                                         |
| 2 | 158733135 | 1.59E+08 | KD2-H4K8ac_peak_17771 | 12.42761 | ACVR1_ENSG00000115170;UPP2_ENSG00000007001;RP11-546J1.1_ENSG00000270557 |
| 2 | 158858799 | 1.59E+08 | KD2-H4K8ac_peak_17772 | 10.0692  |                                                                         |
| 2 | 159823690 | 1.6E+08  | KD2-H4K8ac_peak_17773 | 18.80403 | TANC1_ENSG00000115183                                                   |
| 2 | 159911487 | 1.6E+08  | KD2-H4K8ac_peak_17774 | 4.75764  |                                                                         |
| 2 | 160142791 | 1.6E+08  | KD2-H4K8ac_peak_17775 | 6.24114  | WDSUB1_ENSG00000196151                                                  |
| 2 | 160471914 | 1.6E+08  | KD2-H4K8ac_peak_17776 | 13.81781 | BAZ2B_ENSG00000123636;AC009506.1_ENSG00000224152                        |
| 2 | 160568630 | 1.61E+08 | KD2-H4K8ac_peak_17777 | 7.36799  | AC009961.3_ENSG00000226266;MARCH7_ENSG00000136536                       |
| 2 | 160569067 | 1.61E+08 | KD2-H4K8ac_peak_17778 | 13.35993 | AC009961.3_ENSG00000226266;MARCH7_ENSG00000136536                       |
| 2 | 160654323 | 1.61E+08 | KD2-H4K8ac_peak_17779 | 13.9234  | CD302_ENSG00000241399                                                   |
| 2 | 161264583 | 1.61E+08 | KD2-H4K8ac_peak_17780 | 7.05051  | MIR4785_ENSG00000263948                                                 |
| 2 | 161349003 | 1.61E+08 | KD2-H4K8ac_peak_17781 | 11.70505 | RBMS1_ENSG00000153250                                                   |
| 2 | 161349757 | 1.61E+08 | KD2-H4K8ac_peak_17782 | 10.96455 | RBMS1_ENSG00000153250                                                   |
| 2 | 161777652 | 1.62E+08 | KD2-H4K8ac_peak_17783 | 7.12754  |                                                                         |
| 2 | 162016128 | 1.62E+08 | KD2-H4K8ac_peak_17784 | 5.14125  | AC009313.1_ENSG00000224467                                              |
| 2 | 162016967 | 1.62E+08 | KD2-H4K8ac_peak_17785 | 10.96455 | AC009313.1_ENSG00000224467                                              |
| 2 | 162094211 | 1.62E+08 | KD2-H4K8ac_peak_17786 | 4.42765  |                                                                         |
| 2 | 162095124 | 1.62E+08 | KD2-H4K8ac_peak_17787 | 18.37277 |                                                                         |
| 2 | 162164984 | 1.62E+08 | KD2-H4K8ac_peak_17788 | 13.70605 | PSMD14_ENSG00000115233                                                  |
| 2 | 164592737 | 1.65E+08 | KD2-H4K8ac_peak_17789 | 13.3695  | FIGN_ENSG00000182263                                                    |
| 2 | 165477640 | 1.65E+08 | KD2-H4K8ac_peak_17790 | 5.30799  | GRB14_ENSG00000115290                                                   |
| 2 | 165687536 | 1.66E+08 | KD2-H4K8ac_peak_17791 | 9.15329  |                                                                         |
| 2 | 165697473 | 1.66E+08 | KD2-H4K8ac_peak_17792 | 5.98692  | AC019181.2_ENSG00000233255                                              |
| 2 | 165698318 | 1.66E+08 | KD2-H4K8ac_peak_17793 | 6.20982  |                                                                         |
| 2 | 165747602 | 1.66E+08 | KD2-H4K8ac_peak_17794 | 6.64891  |                                                                         |
| 2 | 165926744 | 1.66E+08 | KD2-H4K8ac_peak_17795 | 10.21502 |                                                                         |
| 2 | 167037893 | 1.67E+08 | KD2-H4K8ac_peak_17796 | 7.59643  | RN7SKP152_ENSG00000222376                                               |
| 2 | 167232024 | 1.67E+08 | KD2-H4K8ac_peak_17797 | 5.54647  | SCN9A_ENSG00000169432                                                   |
| 2 | 167232881 | 1.67E+08 | KD2-H4K8ac_peak_17798 | 5.71749  | SCN9A_ENSG00000169432                                                   |
| 2 | 167275922 | 1.67E+08 | KD2-H4K8ac_peak_17799 | 6.16888  |                                                                         |
| 2 | 167350620 | 1.67E+08 | KD2-H4K8ac_peak_17800 | 6.99815  | SCN7A_ENSG00000136546                                                   |

|   |           |          |                       |          |                                                                         |
|---|-----------|----------|-----------------------|----------|-------------------------------------------------------------------------|
| 2 | 167532942 | 1.68E+08 | KD2-H4K8ac_peak_17801 | 7.01964  |                                                                         |
| 2 | 168149035 | 1.68E+08 | KD2-H4K8ac_peak_17802 | 14.99434 | AC074363.1_ENSG00000228222                                              |
| 2 | 168964625 | 1.69E+08 | KD2-H4K8ac_peak_17803 | 8.1233   |                                                                         |
| 2 | 169103174 | 1.69E+08 | KD2-H4K8ac_peak_17804 | 8.59579  |                                                                         |
| 2 | 169103656 | 1.69E+08 | KD2-H4K8ac_peak_17805 | 16.32216 | STK39_ENSG00000198648                                                   |
| 2 | 169203444 | 1.69E+08 | KD2-H4K8ac_peak_17806 | 5.54647  |                                                                         |
| 2 | 169294507 | 1.69E+08 | KD2-H4K8ac_peak_17807 | 10.77174 |                                                                         |
| 2 | 169295573 | 1.69E+08 | KD2-H4K8ac_peak_17808 | 11.44456 |                                                                         |
| 2 | 169313331 | 1.69E+08 | KD2-H4K8ac_peak_17809 | 8.85813  | CERS6_ENSG00000172292                                                   |
| 2 | 169747171 | 1.7E+08  | KD2-H4K8ac_peak_17810 | 5.15777  |                                                                         |
| 2 | 169769587 | 1.7E+08  | KD2-H4K8ac_peak_17811 | 9.02371  | SPC25_ENSG00000152253                                                   |
| 2 | 169770096 | 1.7E+08  | KD2-H4K8ac_peak_17812 | 8.1233   | SPC25_ENSG00000152253                                                   |
| 2 | 170440911 | 1.7E+08  | KD2-H4K8ac_peak_17813 | 8.26945  | PIIG_ENSG00000138398                                                    |
| 2 | 170551084 | 1.71E+08 | KD2-H4K8ac_peak_17814 | 9.89383  | CCDC173_ENSG00000154479;PHOSPHO2_ENSG00000144362;KLHL23_ENSG00000213160 |
| 2 | 170570262 | 1.71E+08 | KD2-H4K8ac_peak_17815 | 7.27716  |                                                                         |
| 2 | 170572112 | 1.71E+08 | KD2-H4K8ac_peak_17816 | 5.88845  |                                                                         |
| 2 | 170572996 | 1.71E+08 | KD2-H4K8ac_peak_17817 | 13.81781 |                                                                         |
| 2 | 170574090 | 1.71E+08 | KD2-H4K8ac_peak_17818 | 10.0692  |                                                                         |
| 2 | 170590303 | 1.71E+08 | KD2-H4K8ac_peak_17819 | 13.44374 |                                                                         |
| 2 | 170654692 | 1.71E+08 | KD2-H4K8ac_peak_17820 | 7.71478  |                                                                         |
| 2 | 170681084 | 1.71E+08 | KD2-H4K8ac_peak_17821 | 10.29344 | METTL5_ENSG00000138382                                                  |
| 2 | 170681761 | 1.71E+08 | KD2-H4K8ac_peak_17822 | 4.86324  | METTL5_ENSG00000138382                                                  |
| 2 | 170684053 | 1.71E+08 | KD2-H4K8ac_peak_17823 | 8.4716   | UBR3_ENSG00000144357                                                    |
| 2 | 171627630 | 1.72E+08 | KD2-H4K8ac_peak_17824 | 7.76329  | AC007405.4_ENSG00000234350;AC007405.6_ENSG00000239467                   |
| 2 | 171729058 | 1.72E+08 | KD2-H4K8ac_peak_17825 | 4.77079  |                                                                         |
| 2 | 171784750 | 1.72E+08 | KD2-H4K8ac_peak_17826 | 9.1707   | GORASP2_ENSG00000115806                                                 |
| 2 | 171785777 | 1.72E+08 | KD2-H4K8ac_peak_17827 | 11.02863 | GORASP2_ENSG00000115806                                                 |
| 2 | 171829860 | 1.72E+08 | KD2-H4K8ac_peak_17828 | 22.25695 |                                                                         |
| 2 | 172016463 | 1.72E+08 | KD2-H4K8ac_peak_17829 | 8.23274  |                                                                         |
| 2 | 172017626 | 1.72E+08 | KD2-H4K8ac_peak_17830 | 7.12754  |                                                                         |
| 2 | 172290857 | 1.72E+08 | KD2-H4K8ac_peak_17831 | 9.41619  | METTL8_ENSG00000123600;DCAF17_ENSG00000115827                           |
| 2 | 172378995 | 1.72E+08 | KD2-H4K8ac_peak_17832 | 8.55271  | CYBRD1_ENSG00000071967                                                  |
| 2 | 172543999 | 1.73E+08 | KD2-H4K8ac_peak_17833 | 8.94469  | DYNC112_ENSG00000077380                                                 |
| 2 | 172544457 | 1.73E+08 | KD2-H4K8ac_peak_17834 | 7.36799  | DYNC112_ENSG00000077380                                                 |
| 2 | 172864542 | 1.73E+08 | KD2-H4K8ac_peak_17835 | 5.9696   | SLC25A12_ENSG00000115840;METAP1D_ENSG00000172878                        |
| 2 | 173099450 | 1.73E+08 | KD2-H4K8ac_peak_17836 | 6.07178  |                                                                         |
| 2 | 173099888 | 1.73E+08 | KD2-H4K8ac_peak_17837 | 13.57066 |                                                                         |
| 2 | 173291942 | 1.73E+08 | KD2-H4K8ac_peak_17838 | 6.13909  | ITGA6_ENSG00000091409                                                   |
| 2 | 173292362 | 1.73E+08 | KD2-H4K8ac_peak_17839 | 4.33139  | ITGA6_ENSG00000091409;AC078883.4_ENSG00000226963                        |
| 2 | 173420273 | 1.73E+08 | KD2-H4K8ac_peak_17840 | 8.5092   | AC093818.1_ENSG00000225205;PDK1_ENSG00000152256                         |
| 2 | 173420892 | 1.73E+08 | KD2-H4K8ac_peak_17841 | 8.52559  | AC093818.1_ENSG00000225205;PDK1_ENSG00000152256                         |
| 2 | 173591173 | 1.74E+08 | KD2-H4K8ac_peak_17842 | 5.01262  |                                                                         |
| 2 | 173600295 | 1.74E+08 | KD2-H4K8ac_peak_17843 | 7.92775  | RAPGEF4-AS1_ENSG00000228016;RAPGEF4_ENSG00000091428                     |
| 2 | 173940284 | 1.74E+08 | KD2-H4K8ac_peak_17844 | 15.13261 | MLTK_ENSG00000091436                                                    |
| 2 | 174219200 | 1.74E+08 | KD2-H4K8ac_peak_17845 | 9.20193  | AC092573.2_ENSG00000236391;CDCA7_ENSG00000144354                        |
| 2 | 174313634 | 1.74E+08 | KD2-H4K8ac_peak_17846 | 9.36516  |                                                                         |



|   |           |          |                       |          |                                                                        |
|---|-----------|----------|-----------------------|----------|------------------------------------------------------------------------|
| 2 | 174828739 | 1.75E+08 | KD2-H4K8ac_peak_17847 | 10.72656 |                                                                        |
| 2 | 174829687 | 1.75E+08 | KD2-H4K8ac_peak_17848 | 11.02863 | SP3_ENSG00000172845                                                    |
| 2 | 174830298 | 1.75E+08 | KD2-H4K8ac_peak_17849 | 6.40297  | SP3_ENSG00000172845                                                    |
| 2 | 174855799 | 1.75E+08 | KD2-H4K8ac_peak_17850 | 6.85193  |                                                                        |
| 2 | 174888571 | 1.75E+08 | KD2-H4K8ac_peak_17851 | 5.38581  |                                                                        |
| 2 | 174889223 | 1.75E+08 | KD2-H4K8ac_peak_17852 | 4.37815  | RP11-394I13.1_ENSG00000260868                                          |
| 2 | 174904391 | 1.75E+08 | KD2-H4K8ac_peak_17853 | 8.55271  |                                                                        |
| 2 | 175112889 | 1.75E+08 | KD2-H4K8ac_peak_17854 | 12.57143 | OLA1_ENSG00000138430                                                   |
| 2 | 175113531 | 1.75E+08 | KD2-H4K8ac_peak_17855 | 14.66631 | OLA1_ENSG00000138430                                                   |
| 2 | 175399035 | 1.75E+08 | KD2-H4K8ac_peak_17856 | 6.40683  |                                                                        |
| 2 | 175432574 | 1.75E+08 | KD2-H4K8ac_peak_17857 | 7.91974  |                                                                        |
| 2 | 175450554 | 1.75E+08 | KD2-H4K8ac_peak_17858 | 5.16439  |                                                                        |
| 2 | 175528656 | 1.76E+08 | KD2-H4K8ac_peak_17859 | 7.27716  |                                                                        |
| 2 | 175546854 | 1.76E+08 | KD2-H4K8ac_peak_17860 | 16.49944 | WIPF1_ENSG00000115935                                                  |
| 2 | 175637094 | 1.76E+08 | KD2-H4K8ac_peak_17861 | 10.72656 |                                                                        |
| 2 | 175651836 | 1.76E+08 | KD2-H4K8ac_peak_17862 | 7.59643  | AC018890.4_ENSG00000237104                                             |
| 2 | 175653479 | 1.76E+08 | KD2-H4K8ac_peak_17863 | 9.15329  | AC018890.4_ENSG00000237104                                             |
| 2 | 175869478 | 1.76E+08 | KD2-H4K8ac_peak_17864 | 17.51891 | CHN1_ENSG00000128656                                                   |
| 2 | 176032181 | 1.76E+08 | KD2-H4K8ac_peak_17865 | 10.53377 | ATF2_ENSG00000115966;MIR933_ENSG00000215973;AC096649.2_ENSG00000229750 |
| 2 | 176045666 | 1.76E+08 | KD2-H4K8ac_peak_17866 | 9.61895  |                                                                        |
| 2 | 176046756 | 1.76E+08 | KD2-H4K8ac_peak_17867 | 7.20567  |                                                                        |
| 2 | 176749416 | 1.77E+08 | KD2-H4K8ac_peak_17868 | 3.75035  |                                                                        |
| 2 | 176753809 | 1.77E+08 | KD2-H4K8ac_peak_17869 | 4.42765  |                                                                        |
| 2 | 176866462 | 1.77E+08 | KD2-H4K8ac_peak_17870 | 14.8083  | KIAA1715_ENSG00000144320                                               |
| 2 | 176867197 | 1.77E+08 | KD2-H4K8ac_peak_17871 | 13.81781 | KIAA1715_ENSG00000144320                                               |
| 2 | 176957329 | 1.77E+08 | KD2-H4K8ac_peak_17872 | 8.23062  | HOXD13_ENSG00000128714                                                 |
| 2 | 176969460 | 1.77E+08 | KD2-H4K8ac_peak_17873 | 6.8836   | HOXD11_ENSG00000128713                                                 |
| 2 | 176986672 | 1.77E+08 | KD2-H4K8ac_peak_17874 | 16.12525 | HOXD9_ENSG00000128709                                                  |
| 2 | 176994050 | 1.77E+08 | KD2-H4K8ac_peak_17875 | 23.70459 | HOXD8_ENSG00000175879                                                  |
| 2 | 176994710 | 1.77E+08 | KD2-H4K8ac_peak_17876 | 9.34989  | HOXD8_ENSG00000175879                                                  |
| 2 | 177000544 | 1.77E+08 | KD2-H4K8ac_peak_17877 | 8.85813  | HOXD3_ENSG00000128652                                                  |
| 2 | 177001139 | 1.77E+08 | KD2-H4K8ac_peak_17878 | 13.95627 | HOXD-AS2_ENSG00000237380;HOXD3_ENSG00000128652                         |
| 2 | 177021198 | 1.77E+08 | KD2-H4K8ac_peak_17879 | 6.66692  |                                                                        |
| 2 | 177021944 | 1.77E+08 | KD2-H4K8ac_peak_17880 | 7.49599  |                                                                        |
| 2 | 177022976 | 1.77E+08 | KD2-H4K8ac_peak_17881 | 5.01002  |                                                                        |
| 2 | 177024130 | 1.77E+08 | KD2-H4K8ac_peak_17882 | 6.36375  |                                                                        |
| 2 | 177052999 | 1.77E+08 | KD2-H4K8ac_peak_17883 | 8.4716   | HOXD-AS1_ENSG00000224189;HOXD1_ENSG00000128645                         |
| 2 | 177053461 | 1.77E+08 | KD2-H4K8ac_peak_17884 | 11.55418 | HOXD-AS1_ENSG00000224189;HOXD1_ENSG00000128645                         |
| 2 | 177134204 | 1.77E+08 | KD2-H4K8ac_peak_17885 | 7.92775  | MTX2_ENSG00000128654                                                   |
| 2 | 177329619 | 1.77E+08 | KD2-H4K8ac_peak_17886 | 4.77079  |                                                                        |
| 2 | 177419105 | 1.77E+08 | KD2-H4K8ac_peak_17887 | 8.30974  |                                                                        |
| 2 | 177440213 | 1.77E+08 | KD2-H4K8ac_peak_17888 | 14.55656 |                                                                        |
| 2 | 177453483 | 1.77E+08 | KD2-H4K8ac_peak_17889 | 5.25071  |                                                                        |
| 2 | 177502101 | 1.78E+08 | KD2-H4K8ac_peak_17890 | 19.9503  | LINC01116_ENSG00000163364;LINC01117_ENSG00000224577                    |
| 2 | 177903413 | 1.78E+08 | KD2-H4K8ac_peak_17891 | 6.75638  |                                                                        |
| 2 | 178029183 | 1.78E+08 | KD2-H4K8ac_peak_17892 | 6.16888  | AC079305.11_ENSG00000236501                                            |

|   |           |          |                       |          |                                                                              |
|---|-----------|----------|-----------------------|----------|------------------------------------------------------------------------------|
| 2 | 178076886 | 1.78E+08 | KD2-H4K8ac_peak_17893 | 6.65673  | AC079305.8_ENSG00000229337;HNRNPA3_ENSG00000170144;MIR4444-2_ENSG00000263721 |
| 2 | 178077543 | 1.78E+08 | KD2-H4K8ac_peak_17894 | 8.85813  | AC079305.8_ENSG00000229337;HNRNPA3_ENSG00000170144;MIR4444-2_ENSG00000263721 |
| 2 | 178128425 | 1.78E+08 | KD2-H4K8ac_peak_17895 | 17.17257 | AC079305.10_ENSG00000222043                                                  |
| 2 | 178129667 | 1.78E+08 | KD2-H4K8ac_peak_17896 | 11.05407 | AC079305.10_ENSG00000222043                                                  |
| 2 | 178256981 | 1.78E+08 | KD2-H4K8ac_peak_17897 | 7.49599  | NFE2L2_ENSG00000116044;AC074286.1_ENSG00000213963;AGPS_ENSG00000018510       |
| 2 | 178387353 | 1.78E+08 | KD2-H4K8ac_peak_17898 | 7.12754  |                                                                              |
| 2 | 178393749 | 1.78E+08 | KD2-H4K8ac_peak_17899 | 5.14125  |                                                                              |
| 2 | 178412599 | 1.78E+08 | KD2-H4K8ac_peak_17900 | 7.40633  |                                                                              |
| 2 | 178416720 | 1.78E+08 | KD2-H4K8ac_peak_17901 | 12.57865 | TTC30B_ENSG00000196659                                                       |
| 2 | 178483105 | 1.78E+08 | KD2-H4K8ac_peak_17902 | 5.38581  | TTC30A_ENSG00000197557                                                       |
| 2 | 178483523 | 1.78E+08 | KD2-H4K8ac_peak_17903 | 10.87093 | TTC30A_ENSG00000197557                                                       |
| 2 | 178623337 | 1.79E+08 | KD2-H4K8ac_peak_17904 | 6.65673  |                                                                              |
| 2 | 178872498 | 1.79E+08 | KD2-H4K8ac_peak_17905 | 6.40683  |                                                                              |
| 2 | 178937564 | 1.79E+08 | KD2-H4K8ac_peak_17906 | 15.13261 |                                                                              |
| 2 | 178976649 | 1.79E+08 | KD2-H4K8ac_peak_17907 | 4.9025   | RBM45_ENSG00000155636                                                        |
| 2 | 178977236 | 1.79E+08 | KD2-H4K8ac_peak_17908 | 5.13615  | RBM45_ENSG00000155636                                                        |
| 2 | 179058588 | 1.79E+08 | KD2-H4K8ac_peak_17909 | 8.74596  | OSBPL6_ENSG00000079156                                                       |
| 2 | 179277951 | 1.79E+08 | KD2-H4K8ac_peak_17910 | 11.24702 | AC009948.5_ENSG00000223960                                                   |
| 2 | 179315601 | 1.79E+08 | KD2-H4K8ac_peak_17911 | 12.13241 | PRKRA_ENSG00000180228;DFNB59_ENSG00000204311                                 |
| 2 | 179316307 | 1.79E+08 | KD2-H4K8ac_peak_17912 | 14.275   | PRKRA_ENSG00000180228;DFNB59_ENSG00000204311                                 |
| 2 | 179345263 | 1.79E+08 | KD2-H4K8ac_peak_17913 | 8.55271  | PLEKHA3_ENSG00000116095                                                      |
| 2 | 180129157 | 1.8E+08  | KD2-H4K8ac_peak_17914 | 8.30974  | SESTD1_ENSG00000187231                                                       |
| 2 | 180725878 | 1.81E+08 | KD2-H4K8ac_peak_17915 | 5.51783  | ZNF385B_ENSG00000144331;MIR1258_ENSG00000221240                              |
| 2 | 180871535 | 1.81E+08 | KD2-H4K8ac_peak_17916 | 11.24702 | CWC22_ENSG00000163510                                                        |
| 2 | 181844760 | 1.82E+08 | KD2-H4K8ac_peak_17917 | 17.25154 | AC104076.3_ENSG00000236153                                                   |
| 2 | 181845769 | 1.82E+08 | KD2-H4K8ac_peak_17918 | 13.34404 | AC104076.3_ENSG00000236153                                                   |
| 2 | 182321290 | 1.82E+08 | KD2-H4K8ac_peak_17919 | 8.10216  | ITGA4_ENSG00000115232                                                        |
| 2 | 182322128 | 1.82E+08 | KD2-H4K8ac_peak_17920 | 12.99417 | ITGA4_ENSG00000115232                                                        |
| 2 | 182521334 | 1.83E+08 | KD2-H4K8ac_peak_17921 | 9.31907  |                                                                              |
| 2 | 182545565 | 1.83E+08 | KD2-H4K8ac_peak_17922 | 5.54647  | CERKL_ENSG00000188452;NEUROD1_ENSG00000162992                                |
| 2 | 182548256 | 1.83E+08 | KD2-H4K8ac_peak_17923 | 11.89502 | AC013733.3_ENSG00000234595                                                   |
| 2 | 183580571 | 1.84E+08 | KD2-H4K8ac_peak_17924 | 10.43145 | DNAJC10_ENSG00000077232                                                      |
| 2 | 183731202 | 1.84E+08 | KD2-H4K8ac_peak_17925 | 10.86378 | FRZB_ENSG00000162998                                                         |
| 2 | 183902299 | 1.84E+08 | KD2-H4K8ac_peak_17926 | 11.79585 | NCKAP1_ENSG00000061676                                                       |
| 2 | 183903623 | 1.84E+08 | KD2-H4K8ac_peak_17927 | 4.42765  | NCKAP1_ENSG00000061676                                                       |
| 2 | 183989193 | 1.84E+08 | KD2-H4K8ac_peak_17928 | 8.55271  |                                                                              |
| 2 | 185462497 | 1.85E+08 | KD2-H4K8ac_peak_17929 | 4.37815  | ZNF804A_ENSG00000170396                                                      |
| 2 | 185463346 | 1.85E+08 | KD2-H4K8ac_peak_17930 | 6.20982  | ZNF804A_ENSG00000170396                                                      |
| 2 | 187350450 | 1.87E+08 | KD2-H4K8ac_peak_17931 | 10.63441 | ZC3H15_ENSG00000065548                                                       |
| 2 | 187351077 | 1.87E+08 | KD2-H4K8ac_peak_17932 | 6.99815  | ZC3H15_ENSG00000065548                                                       |
| 2 | 187454378 | 1.87E+08 | KD2-H4K8ac_peak_17933 | 14.00658 | ITGAV_ENSG00000138448                                                        |
| 2 | 187558501 | 1.88E+08 | KD2-H4K8ac_peak_17934 | 8.30974  | FAM171B_ENSG00000144369                                                      |
| 2 | 187713638 | 1.88E+08 | KD2-H4K8ac_peak_17935 | 6.99815  | ZSWIM2_ENSG00000163012                                                       |
| 2 | 188859188 | 1.89E+08 | KD2-H4K8ac_peak_17936 | 4.06758  |                                                                              |
| 2 | 189156323 | 1.89E+08 | KD2-H4K8ac_peak_17937 | 11.92978 | GULP1_ENSG00000144366                                                        |
| 2 | 189483415 | 1.89E+08 | KD2-H4K8ac_peak_17938 | 7.12754  |                                                                              |

|   |           |          |                       |          |                                                     |
|---|-----------|----------|-----------------------|----------|-----------------------------------------------------|
| 2 | 190119261 | 1.9E+08  | KD2-H4K8ac_peak_17939 | 7.12754  |                                                     |
| 2 | 190306070 | 1.9E+08  | KD2-H4K8ac_peak_17940 | 9.97423  | WDR75_ENSG00000115368                               |
| 2 | 190444960 | 1.9E+08  | KD2-H4K8ac_peak_17941 | 10.43145 |                                                     |
| 2 | 190467589 | 1.9E+08  | KD2-H4K8ac_peak_17942 | 9.15329  |                                                     |
| 2 | 190539001 | 1.91E+08 | KD2-H4K8ac_peak_17943 | 14.15075 | ANKAR_ENSG00000151687                               |
| 2 | 190627040 | 1.91E+08 | KD2-H4K8ac_peak_17944 | 8.17902  | OSGEPL1_ENSG00000128694;OSGEPL1-AS1_ENSG00000253559 |
| 2 | 190648492 | 1.91E+08 | KD2-H4K8ac_peak_17945 | 8.55271  | ORMDL1_ENSG00000128699;PMS1_ENSG00000064933         |
| 2 | 191044959 | 1.91E+08 | KD2-H4K8ac_peak_17946 | 9.89126  |                                                     |
| 2 | 191208001 | 1.91E+08 | KD2-H4K8ac_peak_17947 | 6.56211  | HIBCH_ENSG00000198130;INPP1_ENSG00000151689         |
| 2 | 191208433 | 1.91E+08 | KD2-H4K8ac_peak_17948 | 10.53377 | HIBCH_ENSG00000198130;INPP1_ENSG00000151689         |
| 2 | 191272733 | 1.91E+08 | KD2-H4K8ac_peak_17949 | 12.84642 | MFS66_ENSG00000151690                               |
| 2 | 191399086 | 1.91E+08 | KD2-H4K8ac_peak_17950 | 16.57619 | TMEM194B_ENSG00000189362;AC093388.3_ENSG00000233654 |
| 2 | 191492657 | 1.91E+08 | KD2-H4K8ac_peak_17951 | 13.92307 |                                                     |
| 2 | 191513023 | 1.92E+08 | KD2-H4K8ac_peak_17952 | 10.96455 |                                                     |
| 2 | 191513414 | 1.92E+08 | KD2-H4K8ac_peak_17953 | 6.40683  |                                                     |
| 2 | 191513870 | 1.92E+08 | KD2-H4K8ac_peak_17954 | 7.47462  |                                                     |
| 2 | 191885275 | 1.92E+08 | KD2-H4K8ac_peak_17955 | 13.95627 | STAT1_ENSG00000115415;AC067945.4_ENSG00000231858    |
| 2 | 192110222 | 1.92E+08 | KD2-H4K8ac_peak_17956 | 9.6247   | AC092614.2_ENSG00000227542;MYO1B_ENSG00000128641    |
| 2 | 192344514 | 1.92E+08 | KD2-H4K8ac_peak_17957 | 5.53033  |                                                     |
| 2 | 192365695 | 1.92E+08 | KD2-H4K8ac_peak_17958 | 13.56049 |                                                     |
| 2 | 193059853 | 1.93E+08 | KD2-H4K8ac_peak_17959 | 9.73431  | TMEFF2_ENSG00000144339                              |
| 2 | 196313076 | 1.96E+08 | KD2-H4K8ac_peak_17960 | 7.12754  | AC064834.1_ENSG00000224099                          |
| 2 | 196315160 | 1.96E+08 | KD2-H4K8ac_peak_17961 | 4.01115  |                                                     |
| 2 | 196316344 | 1.96E+08 | KD2-H4K8ac_peak_17962 | 5.16439  |                                                     |
| 2 | 196520700 | 1.97E+08 | KD2-H4K8ac_peak_17963 | 4.211    |                                                     |
| 2 | 196522003 | 1.97E+08 | KD2-H4K8ac_peak_17964 | 12.74171 |                                                     |
| 2 | 197457163 | 1.97E+08 | KD2-H4K8ac_peak_17965 | 11.66477 | HECW2_ENSG00000138411                               |
| 2 | 197466478 | 1.97E+08 | KD2-H4K8ac_peak_17966 | 12.42547 |                                                     |
| 2 | 197504141 | 1.98E+08 | KD2-H4K8ac_peak_17967 | 9.59147  | CCDC150_ENSG00000144395                             |
| 2 | 197664002 | 1.98E+08 | KD2-H4K8ac_peak_17968 | 4.86324  | GTF3C3_ENSG00000119041                              |
| 2 | 197664776 | 1.98E+08 | KD2-H4K8ac_peak_17969 | 4.0528   | GTF3C3_ENSG00000119041                              |
| 2 | 197791607 | 1.98E+08 | KD2-H4K8ac_peak_17970 | 4.54006  | PGAP1_ENSG00000197121                               |
| 2 | 197853500 | 1.98E+08 | KD2-H4K8ac_peak_17971 | 6.72021  |                                                     |
| 2 | 197861363 | 1.98E+08 | KD2-H4K8ac_peak_17972 | 8.70735  |                                                     |
| 2 | 197915692 | 1.98E+08 | KD2-H4K8ac_peak_17973 | 5.9696   |                                                     |
| 2 | 197917587 | 1.98E+08 | KD2-H4K8ac_peak_17974 | 9.59814  |                                                     |
| 2 | 197922360 | 1.98E+08 | KD2-H4K8ac_peak_17975 | 7.15405  |                                                     |
| 2 | 197955381 | 1.98E+08 | KD2-H4K8ac_peak_17976 | 6.40683  |                                                     |
| 2 | 197956017 | 1.98E+08 | KD2-H4K8ac_peak_17977 | 10.86378 |                                                     |
| 2 | 197960163 | 1.98E+08 | KD2-H4K8ac_peak_17978 | 3.75035  |                                                     |
| 2 | 197973159 | 1.98E+08 | KD2-H4K8ac_peak_17979 | 7.01964  |                                                     |
| 2 | 198008468 | 1.98E+08 | KD2-H4K8ac_peak_17980 | 7.12754  |                                                     |
| 2 | 198010290 | 1.98E+08 | KD2-H4K8ac_peak_17981 | 8.1233   |                                                     |
| 2 | 198028953 | 1.98E+08 | KD2-H4K8ac_peak_17982 | 3.75035  |                                                     |
| 2 | 198043641 | 1.98E+08 | KD2-H4K8ac_peak_17983 | 6.40683  |                                                     |
| 2 | 198045001 | 1.98E+08 | KD2-H4K8ac_peak_17984 | 5.46431  |                                                     |

|   |           |          |                       |          |                                                    |
|---|-----------|----------|-----------------------|----------|----------------------------------------------------|
| 2 | 198049606 | 1.98E+08 | KD2-H4K8ac_peak_17985 | 6.2781   |                                                    |
| 2 | 198111517 | 1.98E+08 | KD2-H4K8ac_peak_17986 | 10.05606 |                                                    |
| 2 | 198112343 | 1.98E+08 | KD2-H4K8ac_peak_17987 | 10.95611 |                                                    |
| 2 | 198144190 | 1.98E+08 | KD2-H4K8ac_peak_17988 | 6.66692  |                                                    |
| 2 | 198174534 | 1.98E+08 | KD2-H4K8ac_peak_17989 | 9.28039  | ANKRD44_ENSG00000065413;AC010746.3_ENSG00000225979 |
| 2 | 198224764 | 1.98E+08 | KD2-H4K8ac_peak_17990 | 8.10216  |                                                    |
| 2 | 198242500 | 1.98E+08 | KD2-H4K8ac_peak_17991 | 6.99815  |                                                    |
| 2 | 198243674 | 1.98E+08 | KD2-H4K8ac_peak_17992 | 5.30799  |                                                    |
| 2 | 198299385 | 1.98E+08 | KD2-H4K8ac_peak_17993 | 6.40683  | SF3B1_ENSG00000115524                              |
| 2 | 198300831 | 1.98E+08 | KD2-H4K8ac_peak_17994 | 5.73839  |                                                    |
| 2 | 198364279 | 1.98E+08 | KD2-H4K8ac_peak_17995 | 9.34989  | HSPE1_ENSG00000115541;HSPE1-MOB4_ENSG00000270757   |
| 2 | 198364881 | 1.98E+08 | KD2-H4K8ac_peak_17996 | 9.36516  | HSPE1_ENSG00000115541;HSPE1-MOB4_ENSG00000270757   |
| 2 | 198380330 | 1.98E+08 | KD2-H4K8ac_peak_17997 | 14.98936 | HSPD1_ENSG00000144381;MOB4_ENSG00000115540         |
| 2 | 198380865 | 1.98E+08 | KD2-H4K8ac_peak_17998 | 11.79585 | HSPD1_ENSG00000144381;MOB4_ENSG00000115540         |
| 2 | 198569648 | 1.99E+08 | KD2-H4K8ac_peak_17999 | 8.37231  | MARS2_ENSG00000247626                              |
| 2 | 200323778 | 2E+08    | KD2-H4K8ac_peak_18000 | 9.11031  |                                                    |
| 2 | 200787508 | 2.01E+08 | KD2-H4K8ac_peak_18001 | 6.16888  |                                                    |
| 2 | 200819053 | 2.01E+08 | KD2-H4K8ac_peak_18002 | 7.12754  | C2orf47_ENSG00000162972                            |
| 2 | 200819914 | 2.01E+08 | KD2-H4K8ac_peak_18003 | 18.41184 | TYW5_ENSG00000162971;C2orf47_ENSG00000162972       |
| 2 | 201171454 | 2.01E+08 | KD2-H4K8ac_peak_18004 | 7.07117  | SPATS2L_ENSG00000196141                            |
| 2 | 201374185 | 2.01E+08 | KD2-H4K8ac_peak_18005 | 13.73635 | SGOL2_ENSG00000163535                              |
| 2 | 201374961 | 2.01E+08 | KD2-H4K8ac_peak_18006 | 7.76329  | SGOL2_ENSG00000163535                              |
| 2 | 201676309 | 2.02E+08 | KD2-H4K8ac_peak_18007 | 12.57143 | AC007163.6_ENSG00000230408;BZW1_ENSG00000082153    |
| 2 | 201728794 | 2.02E+08 | KD2-H4K8ac_peak_18008 | 22.66567 | CLK1_ENSG00000013441;Y_RNA_ENSG00000252759         |
| 2 | 201729674 | 2.02E+08 | KD2-H4K8ac_peak_18009 | 14.27981 | CLK1_ENSG00000013441                               |
| 2 | 201754141 | 2.02E+08 | KD2-H4K8ac_peak_18010 | 13.80019 | PPIL3_ENSG00000240344;NIF3L1_ENSG00000196290       |
| 2 | 201754690 | 2.02E+08 | KD2-H4K8ac_peak_18011 | 6.40683  | PPIL3_ENSG00000240344;NIF3L1_ENSG00000196290       |
| 2 | 201827964 | 2.02E+08 | KD2-H4K8ac_peak_18012 | 13.13969 | ORC2_ENSG00000115942;AC005037.3_ENSG00000183308    |
| 2 | 201980485 | 2.02E+08 | KD2-H4K8ac_peak_18013 | 13.31016 | CFLAR_ENSG00000003402                              |
| 2 | 202316519 | 2.02E+08 | KD2-H4K8ac_peak_18014 | 13.09607 | TRAK2_ENSG00000115993                              |
| 2 | 202330358 | 2.02E+08 | KD2-H4K8ac_peak_18015 | 7.59643  |                                                    |
| 2 | 202507320 | 2.03E+08 | KD2-H4K8ac_peak_18016 | 19.35989 | TMEM237_ENSG00000155755                            |
| 2 | 202517809 | 2.03E+08 | KD2-H4K8ac_peak_18017 | 4.42765  |                                                    |
| 2 | 202645411 | 2.03E+08 | KD2-H4K8ac_peak_18018 | 7.0754   | ALS2_ENSG00000003393                               |
| 2 | 202679744 | 2.03E+08 | KD2-H4K8ac_peak_18019 | 8.1233   |                                                    |
| 2 | 202832127 | 2.03E+08 | KD2-H4K8ac_peak_18020 | 6.99815  |                                                    |
| 2 | 202849676 | 2.03E+08 | KD2-H4K8ac_peak_18021 | 7.47462  |                                                    |
| 2 | 202850829 | 2.03E+08 | KD2-H4K8ac_peak_18022 | 4.37709  |                                                    |
| 2 | 202855436 | 2.03E+08 | KD2-H4K8ac_peak_18023 | 4.7849   |                                                    |
| 2 | 202860831 | 2.03E+08 | KD2-H4K8ac_peak_18024 | 5.9696   |                                                    |
| 2 | 202862547 | 2.03E+08 | KD2-H4K8ac_peak_18025 | 18.5703  |                                                    |
| 2 | 202879959 | 2.03E+08 | KD2-H4K8ac_peak_18026 | 5.14125  |                                                    |
| 2 | 202881398 | 2.03E+08 | KD2-H4K8ac_peak_18027 | 6.94954  |                                                    |
| 2 | 202885075 | 2.03E+08 | KD2-H4K8ac_peak_18028 | 7.70289  |                                                    |
| 2 | 202885850 | 2.03E+08 | KD2-H4K8ac_peak_18029 | 8.05667  |                                                    |
| 2 | 202897396 | 2.03E+08 | KD2-H4K8ac_peak_18030 | 4.44527  | RP11-107N15.1_ENSG00000273209                      |

|   |           |          |                       |          |                                                    |
|---|-----------|----------|-----------------------|----------|----------------------------------------------------|
| 2 | 202898608 | 2.03E+08 | KD2-H4K8ac_peak_18031 | 12.69604 | RP11-107N15.1_ENSG00000273209;FZD7_ENSG00000155760 |
| 2 | 202904079 | 2.03E+08 | KD2-H4K8ac_peak_18032 | 5.80249  |                                                    |
| 2 | 203005795 | 2.03E+08 | KD2-H4K8ac_peak_18033 | 10.21502 |                                                    |
| 2 | 203102651 | 2.03E+08 | KD2-H4K8ac_peak_18034 | 11.05407 | SUMO1_ENSG00000116030;AC079354.2_ENSG00000267889   |
| 2 | 203129761 | 2.03E+08 | KD2-H4K8ac_peak_18035 | 8.86391  | NOP58_ENSG00000055044                              |
| 2 | 203130511 | 2.03E+08 | KD2-H4K8ac_peak_18036 | 9.63925  | NOP58_ENSG00000055044                              |
| 2 | 203239816 | 2.03E+08 | KD2-H4K8ac_peak_18037 | 9.6589   | RP11-686O6.2_ENSG00000273456;BMPR2_ENSG00000204217 |
| 2 | 203241175 | 2.03E+08 | KD2-H4K8ac_peak_18038 | 4.26235  | RP11-686O6.2_ENSG00000273456;BMPR2_ENSG00000204217 |
| 2 | 203453713 | 2.03E+08 | KD2-H4K8ac_peak_18039 | 4.37809  |                                                    |
| 2 | 203499092 | 2.03E+08 | KD2-H4K8ac_peak_18040 | 4.86324  | FAM117B_ENSG00000138439                            |
| 2 | 203499829 | 2.04E+08 | KD2-H4K8ac_peak_18041 | 10.19949 | FAM117B_ENSG00000138439                            |
| 2 | 203736268 | 2.04E+08 | KD2-H4K8ac_peak_18042 | 10.17341 | ICA1L_ENSG00000163596                              |
| 2 | 203776657 | 2.04E+08 | KD2-H4K8ac_peak_18043 | 7.48133  | CARF_ENSG00000138380                               |
| 2 | 204103724 | 2.04E+08 | KD2-H4K8ac_peak_18044 | 14.8083  | CYP20A1_ENSG00000119004                            |
| 2 | 204192344 | 2.04E+08 | KD2-H4K8ac_peak_18045 | 12.42761 | ABI2_ENSG00000138443                               |
| 2 | 204399507 | 2.04E+08 | KD2-H4K8ac_peak_18046 | 6.84261  | RAPH1_ENSG00000173166                              |
| 2 | 204400259 | 2.04E+08 | KD2-H4K8ac_peak_18047 | 4.44527  | RAPH1_ENSG00000173166                              |
| 2 | 205318671 | 2.05E+08 | KD2-H4K8ac_peak_18048 | 5.9696   |                                                    |
| 2 | 205409716 | 2.05E+08 | KD2-H4K8ac_peak_18049 | 7.44324  | PARD3B_ENSG00000116117                             |
| 2 | 205410298 | 2.05E+08 | KD2-H4K8ac_peak_18050 | 5.30799  | PARD3B_ENSG00000116117                             |
| 2 | 205889661 | 2.06E+08 | KD2-H4K8ac_peak_18051 | 5.15777  |                                                    |
| 2 | 206055177 | 2.06E+08 | KD2-H4K8ac_peak_18052 | 4.37708  |                                                    |
| 2 | 206477471 | 2.06E+08 | KD2-H4K8ac_peak_18053 | 7.27716  |                                                    |
| 2 | 206595560 | 2.07E+08 | KD2-H4K8ac_peak_18054 | 9.51625  |                                                    |
| 2 | 206598266 | 2.07E+08 | KD2-H4K8ac_peak_18055 | 9.11031  |                                                    |
| 2 | 206610521 | 2.07E+08 | KD2-H4K8ac_peak_18056 | 4.44527  |                                                    |
| 2 | 206611116 | 2.07E+08 | KD2-H4K8ac_peak_18057 | 7.1181   |                                                    |
| 2 | 206949696 | 2.07E+08 | KD2-H4K8ac_peak_18058 | 20.46575 | INO80D_ENSG00000114933;AC007383.3_ENSG00000227946  |
| 2 | 207023716 | 2.07E+08 | KD2-H4K8ac_peak_18059 | 10.65724 | NDUFS1_ENSG00000023228;EEF1B2_ENSG00000114942      |
| 2 | 207024605 | 2.07E+08 | KD2-H4K8ac_peak_18060 | 8.10216  | NDUFS1_ENSG00000023228;EEF1B2_ENSG00000114942      |
| 2 | 207082547 | 2.07E+08 | KD2-H4K8ac_peak_18061 | 4.73064  | GPR1_ENSG00000183671                               |
| 2 | 207083299 | 2.07E+08 | KD2-H4K8ac_peak_18062 | 6.51023  | GPR1_ENSG00000183671                               |
| 2 | 207084342 | 2.07E+08 | KD2-H4K8ac_peak_18063 | 7.27716  |                                                    |
| 2 | 207139657 | 2.07E+08 | KD2-H4K8ac_peak_18064 | 8.59579  | ZDBF2_ENSG00000204186                              |
| 2 | 207308325 | 2.07E+08 | KD2-H4K8ac_peak_18065 | 8.30974  | ADAM23_ENSG00000114948                             |
| 2 | 207629793 | 2.08E+08 | KD2-H4K8ac_peak_18066 | 11.09936 | MDH1B_ENSG00000138400;FASTKD2_ENSG00000118246      |
| 2 | 207646584 | 2.08E+08 | KD2-H4K8ac_peak_18067 | 6.07178  |                                                    |
| 2 | 207847172 | 2.08E+08 | KD2-H4K8ac_peak_18068 | 6.40683  |                                                    |
| 2 | 207847992 | 2.08E+08 | KD2-H4K8ac_peak_18069 | 5.43522  |                                                    |
| 2 | 207931024 | 2.08E+08 | KD2-H4K8ac_peak_18070 | 6.54442  |                                                    |
| 2 | 207950113 | 2.08E+08 | KD2-H4K8ac_peak_18071 | 6.66692  |                                                    |
| 2 | 207950991 | 2.08E+08 | KD2-H4K8ac_peak_18072 | 8.17902  |                                                    |
| 2 | 207953043 | 2.08E+08 | KD2-H4K8ac_peak_18073 | 7.13615  |                                                    |
| 2 | 208024474 | 2.08E+08 | KD2-H4K8ac_peak_18074 | 9.31907  |                                                    |
| 2 | 208025555 | 2.08E+08 | KD2-H4K8ac_peak_18075 | 5.08628  |                                                    |
| 2 | 208026348 | 2.08E+08 | KD2-H4K8ac_peak_18076 | 6.56926  |                                                    |

|   |           |          |                       |          |                                                     |
|---|-----------|----------|-----------------------|----------|-----------------------------------------------------|
| 2 | 208028960 | 2.08E+08 | KD2-H4K8ac_peak_18077 | 6.40297  |                                                     |
| 2 | 208031166 | 2.08E+08 | KD2-H4K8ac_peak_18078 | 11.80283 | KLF7_ENSG00000118263                                |
| 2 | 208116055 | 2.08E+08 | KD2-H4K8ac_peak_18079 | 4.211    |                                                     |
| 2 | 208116754 | 2.08E+08 | KD2-H4K8ac_peak_18080 | 11.03331 |                                                     |
| 2 | 208120528 | 2.08E+08 | KD2-H4K8ac_peak_18081 | 9.63487  |                                                     |
| 2 | 208122313 | 2.08E+08 | KD2-H4K8ac_peak_18082 | 4.86324  |                                                     |
| 2 | 208175135 | 2.08E+08 | KD2-H4K8ac_peak_18083 | 6.15357  |                                                     |
| 2 | 208184264 | 2.08E+08 | KD2-H4K8ac_peak_18084 | 6.07178  |                                                     |
| 2 | 208295524 | 2.08E+08 | KD2-H4K8ac_peak_18085 | 7.12754  |                                                     |
| 2 | 208301191 | 2.08E+08 | KD2-H4K8ac_peak_18086 | 9.8758   |                                                     |
| 2 | 208302865 | 2.08E+08 | KD2-H4K8ac_peak_18087 | 6.66692  |                                                     |
| 2 | 208305480 | 2.08E+08 | KD2-H4K8ac_peak_18088 | 3.96965  |                                                     |
| 2 | 208310091 | 2.08E+08 | KD2-H4K8ac_peak_18089 | 7.12754  |                                                     |
| 2 | 208330460 | 2.08E+08 | KD2-H4K8ac_peak_18090 | 5.61377  |                                                     |
| 2 | 208331114 | 2.08E+08 | KD2-H4K8ac_peak_18091 | 7.40633  |                                                     |
| 2 | 208333438 | 2.08E+08 | KD2-H4K8ac_peak_18092 | 5.01002  |                                                     |
| 2 | 208334397 | 2.08E+08 | KD2-H4K8ac_peak_18093 | 7.47462  |                                                     |
| 2 | 208335746 | 2.08E+08 | KD2-H4K8ac_peak_18094 | 7.36933  |                                                     |
| 2 | 208336991 | 2.08E+08 | KD2-H4K8ac_peak_18095 | 6.54442  |                                                     |
| 2 | 208339078 | 2.08E+08 | KD2-H4K8ac_peak_18096 | 12.20507 |                                                     |
| 2 | 208393835 | 2.08E+08 | KD2-H4K8ac_peak_18097 | 16.09057 | AC007879.5_ENSG00000223725;CREB1_ENSG00000118260    |
| 2 | 208489453 | 2.08E+08 | KD2-H4K8ac_peak_18098 | 16.8435  | METTL21A_ENSG00000144401                            |
| 2 | 208490760 | 2.08E+08 | KD2-H4K8ac_peak_18099 | 10.7186  | METTL21A_ENSG00000144401                            |
| 2 | 208661755 | 2.09E+08 | KD2-H4K8ac_peak_18100 | 5.93446  |                                                     |
| 2 | 208890010 | 2.09E+08 | KD2-H4K8ac_peak_18101 | 8.94469  | PLEKHM3_ENSG00000178385                             |
| 2 | 209129717 | 2.09E+08 | KD2-H4K8ac_peak_18102 | 10.0692  | IDH1_ENSG00000138413;PIKFYVE_ENSG00000115020        |
| 2 | 209131053 | 2.09E+08 | KD2-H4K8ac_peak_18103 | 10.43145 | IDH1_ENSG00000138413;PIKFYVE_ENSG00000115020        |
| 2 | 209224981 | 2.09E+08 | KD2-H4K8ac_peak_18104 | 10.30284 | AC012362.3_ENSG00000213081;PTH2R_ENSG00000144407    |
| 2 | 209794696 | 2.1E+08  | KD2-H4K8ac_peak_18105 | 7.12754  |                                                     |
| 2 | 210288152 | 2.1E+08  | KD2-H4K8ac_peak_18106 | 24.94195 | MAP2_ENSG00000078018                                |
| 2 | 210867410 | 2.11E+08 | KD2-H4K8ac_peak_18107 | 5.88845  | RPE_ENSG00000197713                                 |
| 2 | 211089582 | 2.11E+08 | KD2-H4K8ac_peak_18108 | 7.69287  | ACADL_ENSG00000115361                               |
| 2 | 214016089 | 2.14E+08 | KD2-H4K8ac_peak_18109 | 7.01964  | IKZF2_ENSG00000030419                               |
| 2 | 214016676 | 2.14E+08 | KD2-H4K8ac_peak_18110 | 7.47462  | IKZF2_ENSG00000030419;RP11-105N14.1_ENSG00000270659 |
| 2 | 214149225 | 2.14E+08 | KD2-H4K8ac_peak_18111 | 4.57782  | AC079610.2_ENSG00000196096;SPAG16_ENSG00000144451   |
| 2 | 215548674 | 2.16E+08 | KD2-H4K8ac_peak_18112 | 10.21502 | AC107218.3_ENSG00000197585                          |
| 2 | 216175862 | 2.16E+08 | KD2-H4K8ac_peak_18113 | 7.47462  | ATIC_ENSG00000138363                                |
| 2 | 216176392 | 2.16E+08 | KD2-H4K8ac_peak_18114 | 17.70837 | ATIC_ENSG00000138363                                |
| 2 | 216301055 | 2.16E+08 | KD2-H4K8ac_peak_18115 | 8.17902  | FN1_ENSG00000115414;AC012462.1_ENSG00000230695      |
| 2 | 216946238 | 2.17E+08 | KD2-H4K8ac_peak_18116 | 10.46874 | TMEM169_ENSG00000163449                             |
| 2 | 216972516 | 2.17E+08 | KD2-H4K8ac_peak_18117 | 4.42765  | XRCC5_ENSG00000079246                               |
| 2 | 216973126 | 2.17E+08 | KD2-H4K8ac_peak_18118 | 12.09025 | XRCC5_ENSG00000079246                               |
| 2 | 216974182 | 2.17E+08 | KD2-H4K8ac_peak_18119 | 10.0746  |                                                     |
| 2 | 216979871 | 2.17E+08 | KD2-H4K8ac_peak_18120 | 7.67504  |                                                     |
| 2 | 217080835 | 2.17E+08 | KD2-H4K8ac_peak_18121 | 5.88845  | RP11-566E18.3_ENSG00000260804                       |
| 2 | 217171775 | 2.17E+08 | KD2-H4K8ac_peak_18122 | 6.16888  |                                                     |

|   |           |          |                       |          |                                                      |
|---|-----------|----------|-----------------------|----------|------------------------------------------------------|
| 2 | 217277236 | 2.17E+08 | KD2-H4K8ac_peak_18123 | 10.84707 | AC098820.2_ENSG00000235042;SMARCAL1_ENSG00000138375  |
| 2 | 217362860 | 2.17E+08 | KD2-H4K8ac_peak_18124 | 6.30229  | AC098820.3_ENSG00000232485;RPL37A_ENSG00000197756    |
| 2 | 217363661 | 2.17E+08 | KD2-H4K8ac_peak_18125 | 8.58725  | AC098820.3_ENSG00000232485;RPL37A_ENSG00000197756    |
| 2 | 217460410 | 2.17E+08 | KD2-H4K8ac_peak_18126 | 5.88845  |                                                      |
| 2 | 217483282 | 2.17E+08 | KD2-H4K8ac_peak_18127 | 10.86378 |                                                      |
| 2 | 217485022 | 2.17E+08 | KD2-H4K8ac_peak_18128 | 13.77612 |                                                      |
| 2 | 217486610 | 2.17E+08 | KD2-H4K8ac_peak_18129 | 8.52559  |                                                      |
| 2 | 217487274 | 2.17E+08 | KD2-H4K8ac_peak_18130 | 8.30974  |                                                      |
| 2 | 217497642 | 2.17E+08 | KD2-H4K8ac_peak_18131 | 8.28234  | IGFBP2_ENSG00000115457                               |
| 2 | 217499821 | 2.18E+08 | KD2-H4K8ac_peak_18132 | 5.88845  |                                                      |
| 2 | 217500593 | 2.18E+08 | KD2-H4K8ac_peak_18133 | 7.99241  |                                                      |
| 2 | 217564324 | 2.18E+08 | KD2-H4K8ac_peak_18134 | 7.40314  |                                                      |
| 2 | 217599644 | 2.18E+08 | KD2-H4K8ac_peak_18135 | 5.45396  |                                                      |
| 2 | 217656483 | 2.18E+08 | KD2-H4K8ac_peak_18136 | 12.60538 |                                                      |
| 2 | 217659029 | 2.18E+08 | KD2-H4K8ac_peak_18137 | 4.87807  | RNA5SP120_ENSG00000222832                            |
| 2 | 218112944 | 2.18E+08 | KD2-H4K8ac_peak_18138 | 4.42765  |                                                      |
| 2 | 218155284 | 2.18E+08 | KD2-H4K8ac_peak_18139 | 7.27716  |                                                      |
| 2 | 218375765 | 2.18E+08 | KD2-H4K8ac_peak_18140 | 8.30974  |                                                      |
| 2 | 218458582 | 2.18E+08 | KD2-H4K8ac_peak_18141 | 5.16439  |                                                      |
| 2 | 218486629 | 2.18E+08 | KD2-H4K8ac_peak_18142 | 5.88845  |                                                      |
| 2 | 218501563 | 2.19E+08 | KD2-H4K8ac_peak_18143 | 5.13615  |                                                      |
| 2 | 218594354 | 2.19E+08 | KD2-H4K8ac_peak_18144 | 6.66692  |                                                      |
| 2 | 218787400 | 2.19E+08 | KD2-H4K8ac_peak_18145 | 5.63633  |                                                      |
| 2 | 218797892 | 2.19E+08 | KD2-H4K8ac_peak_18146 | 16.71655 |                                                      |
| 2 | 218807192 | 2.19E+08 | KD2-H4K8ac_peak_18147 | 3.97079  |                                                      |
| 2 | 218867441 | 2.19E+08 | KD2-H4K8ac_peak_18148 | 9.63487  | TNS1_ENSG00000079308                                 |
| 2 | 218874334 | 2.19E+08 | KD2-H4K8ac_peak_18149 | 21.42203 |                                                      |
| 2 | 218875983 | 2.19E+08 | KD2-H4K8ac_peak_18150 | 13.50024 |                                                      |
| 2 | 218880967 | 2.19E+08 | KD2-H4K8ac_peak_18151 | 13.03787 |                                                      |
| 2 | 218883165 | 2.19E+08 | KD2-H4K8ac_peak_18152 | 8.80225  |                                                      |
| 2 | 218899154 | 2.19E+08 | KD2-H4K8ac_peak_18153 | 5.88845  | RUFY4_ENSG00000188282                                |
| 2 | 218933810 | 2.19E+08 | KD2-H4K8ac_peak_18154 | 7.38933  |                                                      |
| 2 | 219082097 | 2.19E+08 | KD2-H4K8ac_peak_18155 | 14.98671 | ARPC2_ENSG00000163466                                |
| 2 | 219124226 | 2.19E+08 | KD2-H4K8ac_peak_18156 | 6.13909  | GPBAR1_ENSG00000179921                               |
| 2 | 219232196 | 2.19E+08 | KD2-H4K8ac_peak_18157 | 7.47462  | AC021016.6_ENSG00000225062                           |
| 2 | 219259587 | 2.19E+08 | KD2-H4K8ac_peak_18158 | 4.20044  |                                                      |
| 2 | 219260319 | 2.19E+08 | KD2-H4K8ac_peak_18159 | 5.1707   |                                                      |
| 2 | 219263112 | 2.19E+08 | KD2-H4K8ac_peak_18160 | 11.50346 | CTDSP1_ENSG00000144579;RP11-378A13.2_ENSG00000273361 |
| 2 | 219264788 | 2.19E+08 | KD2-H4K8ac_peak_18161 | 14.70748 | RP11-378A13.2_ENSG00000273361                        |
| 2 | 219271421 | 2.19E+08 | KD2-H4K8ac_peak_18162 | 9.63487  |                                                      |
| 2 | 219272469 | 2.19E+08 | KD2-H4K8ac_peak_18163 | 7.146    |                                                      |
| 2 | 219432712 | 2.19E+08 | KD2-H4K8ac_peak_18164 | 6.25869  | USP37_ENSG00000135913;RQCD1_ENSG00000144580          |
| 2 | 219433348 | 2.19E+08 | KD2-H4K8ac_peak_18165 | 11.1952  | USP37_ENSG00000135913;RQCD1_ENSG00000144580          |
| 2 | 219469389 | 2.19E+08 | KD2-H4K8ac_peak_18166 | 9.63925  |                                                      |
| 2 | 219472447 | 2.19E+08 | KD2-H4K8ac_peak_18167 | 7.36799  | PLCD4_ENSG00000115556                                |
| 2 | 219524024 | 2.2E+08  | KD2-H4K8ac_peak_18168 | 9.95119  | ZNF142_ENSG00000115568;BCS1L_ENSG00000074582         |

|   |           |         |                       |          |                                                     |
|---|-----------|---------|-----------------------|----------|-----------------------------------------------------|
| 2 | 219524490 | 2.2E+08 | KD2-H4K8ac_peak_18169 | 8.4716   | ZNF142_ENSG00000115568                              |
| 2 | 219536909 | 2.2E+08 | KD2-H4K8ac_peak_18170 | 8.55271  | RNF25_ENSG00000163481;STK36_ENSG00000163482         |
| 2 | 219574794 | 2.2E+08 | KD2-H4K8ac_peak_18171 | 6.66359  | TTLL4_ENSG00000135912                               |
| 2 | 219575670 | 2.2E+08 | KD2-H4K8ac_peak_18172 | 7.76329  | TTLL4_ENSG00000135912                               |
| 2 | 219720175 | 2.2E+08 | KD2-H4K8ac_peak_18173 | 15.59774 |                                                     |
| 2 | 219724651 | 2.2E+08 | KD2-H4K8ac_peak_18174 | 9.40857  | WNT6_ENSG00000115596                                |
| 2 | 219745292 | 2.2E+08 | KD2-H4K8ac_peak_18175 | 9.96798  | WNT10A_ENSG00000135925                              |
| 2 | 219757670 | 2.2E+08 | KD2-H4K8ac_peak_18176 | 11.50346 |                                                     |
| 2 | 219761374 | 2.2E+08 | KD2-H4K8ac_peak_18177 | 8.49556  |                                                     |
| 2 | 219773488 | 2.2E+08 | KD2-H4K8ac_peak_18178 | 12.42761 |                                                     |
| 2 | 219823645 | 2.2E+08 | KD2-H4K8ac_peak_18179 | 10.21366 | CDK5R2_ENSG00000171450                              |
| 2 | 219824435 | 2.2E+08 | KD2-H4K8ac_peak_18180 | 10.30284 | CDK5R2_ENSG00000171450                              |
| 2 | 219827424 | 2.2E+08 | KD2-H4K8ac_peak_18181 | 6.16883  | AC097468.7_ENSG00000235024                          |
| 2 | 219828274 | 2.2E+08 | KD2-H4K8ac_peak_18182 | 7.40314  |                                                     |
| 2 | 219848622 | 2.2E+08 | KD2-H4K8ac_peak_18183 | 9.95119  | FEV_ENSG00000163497                                 |
| 2 | 219861108 | 2.2E+08 | KD2-H4K8ac_peak_18184 | 9.14807  |                                                     |
| 2 | 219862066 | 2.2E+08 | KD2-H4K8ac_peak_18185 | 7.28827  |                                                     |
| 2 | 219863074 | 2.2E+08 | KD2-H4K8ac_peak_18186 | 10.74508 |                                                     |
| 2 | 219864126 | 2.2E+08 | KD2-H4K8ac_peak_18187 | 6.0605   |                                                     |
| 2 | 219865156 | 2.2E+08 | KD2-H4K8ac_peak_18188 | 9.95119  | MIR375_ENSG00000198973                              |
| 2 | 219866932 | 2.2E+08 | KD2-H4K8ac_peak_18189 | 13.50024 | MIR375_ENSG00000198973;AC097468.4_ENSG00000224090   |
| 2 | 219882476 | 2.2E+08 | KD2-H4K8ac_peak_18190 | 9.20388  |                                                     |
| 2 | 220025049 | 2.2E+08 | KD2-H4K8ac_peak_18191 | 11.60333 | NHEJ1_ENSG00000187736                               |
| 2 | 220040993 | 2.2E+08 | KD2-H4K8ac_peak_18192 | 18.5703  | CNPPD1_ENSG00000115649;FAM134A_ENSG00000144567      |
| 2 | 220043088 | 2.2E+08 | KD2-H4K8ac_peak_18193 | 11.89502 | CNPPD1_ENSG00000115649                              |
| 2 | 220083089 | 2.2E+08 | KD2-H4K8ac_peak_18194 | 9.01262  | ABCB6_ENSG00000115657                               |
| 2 | 220083919 | 2.2E+08 | KD2-H4K8ac_peak_18195 | 8.83582  | ABCB6_ENSG00000115657                               |
| 2 | 220094632 | 2.2E+08 | KD2-H4K8ac_peak_18196 | 5.20998  | ATG9A_ENSG00000198925;ANKZF1_ENSG00000163516        |
| 2 | 220110263 | 2.2E+08 | KD2-H4K8ac_peak_18197 | 6.84261  | STK16_ENSG00000115661                               |
| 2 | 220144150 | 2.2E+08 | KD2-H4K8ac_peak_18198 | 9.90914  | DNAJB2_ENSG00000135924                              |
| 2 | 220159167 | 2.2E+08 | KD2-H4K8ac_peak_18199 | 13.87818 | MIR153-1_ENSG00000207647                            |
| 2 | 220253315 | 2.2E+08 | KD2-H4K8ac_peak_18200 | 8.30974  | AC053503.4_ENSG00000229525                          |
| 2 | 220306377 | 2.2E+08 | KD2-H4K8ac_peak_18201 | 7.07117  |                                                     |
| 2 | 220310551 | 2.2E+08 | KD2-H4K8ac_peak_18202 | 6.9556   |                                                     |
| 2 | 220317270 | 2.2E+08 | KD2-H4K8ac_peak_18203 | 9.89126  |                                                     |
| 2 | 220318754 | 2.2E+08 | KD2-H4K8ac_peak_18204 | 10.30284 |                                                     |
| 2 | 220324433 | 2.2E+08 | KD2-H4K8ac_peak_18205 | 11.79585 |                                                     |
| 2 | 220336950 | 2.2E+08 | KD2-H4K8ac_peak_18206 | 7.5554   |                                                     |
| 2 | 220341492 | 2.2E+08 | KD2-H4K8ac_peak_18207 | 12.06346 |                                                     |
| 2 | 220362453 | 2.2E+08 | KD2-H4K8ac_peak_18208 | 14.00658 | RP11-316O14.1_ENSG00000268603;GMPPA_ENSG00000144591 |
| 2 | 220366783 | 2.2E+08 | KD2-H4K8ac_peak_18209 | 7.47462  |                                                     |
| 2 | 220369209 | 2.2E+08 | KD2-H4K8ac_peak_18210 | 7.96322  |                                                     |
| 2 | 220370098 | 2.2E+08 | KD2-H4K8ac_peak_18211 | 12.57865 |                                                     |
| 2 | 220373208 | 2.2E+08 | KD2-H4K8ac_peak_18212 | 11.11797 |                                                     |
| 2 | 220373743 | 2.2E+08 | KD2-H4K8ac_peak_18213 | 13.81781 |                                                     |
| 2 | 220374272 | 2.2E+08 | KD2-H4K8ac_peak_18214 | 9.34195  |                                                     |



|   |           |          |                       |          |                                                   |
|---|-----------|----------|-----------------------|----------|---------------------------------------------------|
| 2 | 220375121 | 2.2E+08  | KD2-H4K8ac_peak_18215 | 6.84261  |                                                   |
| 2 | 220375772 | 2.2E+08  | KD2-H4K8ac_peak_18216 | 5.54647  |                                                   |
| 2 | 220377302 | 2.2E+08  | KD2-H4K8ac_peak_18217 | 9.34989  | ASIC4_ENSG00000072182                             |
| 2 | 220378610 | 2.2E+08  | KD2-H4K8ac_peak_18218 | 8.30114  | ASIC4_ENSG00000072182                             |
| 2 | 220380444 | 2.2E+08  | KD2-H4K8ac_peak_18219 | 5.92591  | AC053503.11_ENSG000000227432                      |
| 2 | 220385081 | 2.2E+08  | KD2-H4K8ac_peak_18220 | 7.36799  |                                                   |
| 2 | 220385860 | 2.2E+08  | KD2-H4K8ac_peak_18221 | 16.822   |                                                   |
| 2 | 220387340 | 2.2E+08  | KD2-H4K8ac_peak_18222 | 6.58902  |                                                   |
| 2 | 220390973 | 2.2E+08  | KD2-H4K8ac_peak_18223 | 6.16883  |                                                   |
| 2 | 220394648 | 2.2E+08  | KD2-H4K8ac_peak_18224 | 7.07117  |                                                   |
| 2 | 220408800 | 2.2E+08  | KD2-H4K8ac_peak_18225 | 10.05606 | CHPF_ENSG00000123989;TMEM198_ENSG00000188760      |
| 2 | 220435536 | 2.2E+08  | KD2-H4K8ac_peak_18226 | 11.92978 | OBSL1_ENSG00000124006                             |
| 2 | 220437087 | 2.2E+08  | KD2-H4K8ac_peak_18227 | 12.80176 | OBSL1_ENSG00000124006                             |
| 2 | 220461021 | 2.2E+08  | KD2-H4K8ac_peak_18228 | 6.99815  |                                                   |
| 2 | 220461852 | 2.2E+08  | KD2-H4K8ac_peak_18229 | 7.76329  | STK11IP_ENSG00000144589                           |
| 2 | 220491851 | 2.2E+08  | KD2-H4K8ac_peak_18230 | 6.0605   | AC009955.8_ENSG00000228973;SLC4A3_ENSG00000114923 |
| 2 | 220492433 | 2.2E+08  | KD2-H4K8ac_peak_18231 | 9.95119  | SLC4A3_ENSG00000114923                            |
| 2 | 223185224 | 2.23E+08 | KD2-H4K8ac_peak_18232 | 6.00243  |                                                   |
| 2 | 223289153 | 2.23E+08 | KD2-H4K8ac_peak_18233 | 5.14125  | SGPP2_ENSG00000163082                             |
| 2 | 223535959 | 2.24E+08 | KD2-H4K8ac_peak_18234 | 9.95119  | MOGAT1_ENSG00000124003                            |
| 2 | 223859940 | 2.24E+08 | KD2-H4K8ac_peak_18235 | 7.27716  |                                                   |
| 2 | 224477872 | 2.24E+08 | KD2-H4K8ac_peak_18236 | 10.05606 |                                                   |
| 2 | 224702063 | 2.25E+08 | KD2-H4K8ac_peak_18237 | 15.32867 | AP1S3_ENSG00000152056                             |
| 2 | 224809159 | 2.25E+08 | KD2-H4K8ac_peak_18238 | 4.06758  | WDFY1_ENSG00000085449                             |
| 2 | 224809634 | 2.25E+08 | KD2-H4K8ac_peak_18239 | 10.29842 | WDFY1_ENSG00000085449                             |
| 2 | 224872790 | 2.25E+08 | KD2-H4K8ac_peak_18240 | 5.64449  |                                                   |
| 2 | 224874059 | 2.25E+08 | KD2-H4K8ac_peak_18241 | 8.37231  |                                                   |
| 2 | 224903720 | 2.25E+08 | KD2-H4K8ac_peak_18242 | 7.96322  | SERPINE2_ENSG00000135919                          |
| 2 | 224904176 | 2.25E+08 | KD2-H4K8ac_peak_18243 | 9.63487  | SERPINE2_ENSG00000135919                          |
| 2 | 225306926 | 2.25E+08 | KD2-H4K8ac_peak_18244 | 7.12754  |                                                   |
| 2 | 225449612 | 2.25E+08 | KD2-H4K8ac_peak_18245 | 4.42765  | CUL3_ENSG00000036257                              |
| 2 | 225847073 | 2.26E+08 | KD2-H4K8ac_peak_18246 | 8.97719  |                                                   |
| 2 | 225847807 | 2.26E+08 | KD2-H4K8ac_peak_18247 | 3.75035  |                                                   |
| 2 | 225848988 | 2.26E+08 | KD2-H4K8ac_peak_18248 | 10.0746  |                                                   |
| 2 | 225906744 | 2.26E+08 | KD2-H4K8ac_peak_18249 | 4.52514  | DOCK10_ENSG00000135905                            |
| 2 | 226263277 | 2.26E+08 | KD2-H4K8ac_peak_18250 | 6.16888  | AC067961.1_ENSG00000232784                        |
| 2 | 226307600 | 2.26E+08 | KD2-H4K8ac_peak_18251 | 4.01115  |                                                   |
| 2 | 227655887 | 2.28E+08 | KD2-H4K8ac_peak_18252 | 8.82366  |                                                   |
| 2 | 227666328 | 2.28E+08 | KD2-H4K8ac_peak_18253 | 5.80056  |                                                   |
| 2 | 227700107 | 2.28E+08 | KD2-H4K8ac_peak_18254 | 20.88898 | RHBDD1_ENSG00000144468                            |
| 2 | 227700853 | 2.28E+08 | KD2-H4K8ac_peak_18255 | 9.63487  | RHBDD1_ENSG00000144468                            |
| 2 | 228189382 | 2.28E+08 | KD2-H4K8ac_peak_18256 | 3.87368  | AC097662.2_ENSG00000236432;MFF_ENSG00000168958    |
| 2 | 228190185 | 2.28E+08 | KD2-H4K8ac_peak_18257 | 6.52179  | AC097662.2_ENSG00000236432;MFF_ENSG00000168958    |
| 2 | 228336917 | 2.28E+08 | KD2-H4K8ac_peak_18258 | 7.12754  | MIR5703_ENSG00000266382;AGFG1_ENSG00000173744     |
| 2 | 230786272 | 2.31E+08 | KD2-H4K8ac_peak_18259 | 11.86082 | FBXO36_ENSG00000153832                            |
| 2 | 230787332 | 2.31E+08 | KD2-H4K8ac_peak_18260 | 9.51625  | TRIP12_ENSG00000153827;FBXO36_ENSG00000153832     |

|   |           |          |                       |          |                                              |
|---|-----------|----------|-----------------------|----------|----------------------------------------------|
| 2 | 230932476 | 2.31E+08 | KD2-H4K8ac_peak_18261 | 10.19949 | SLC16A14_ENSG00000163053                     |
| 2 | 231084693 | 2.31E+08 | KD2-H4K8ac_peak_18262 | 4.0528   |                                              |
| 2 | 231577595 | 2.32E+08 | KD2-H4K8ac_peak_18263 | 18.41184 | CAB39_ENSG00000135932                        |
| 2 | 231712793 | 2.32E+08 | KD2-H4K8ac_peak_18264 | 15.22643 |                                              |
| 2 | 231728990 | 2.32E+08 | KD2-H4K8ac_peak_18265 | 5.30799  | ITM2C_ENSG00000135916                        |
| 2 | 231729810 | 2.32E+08 | KD2-H4K8ac_peak_18266 | 10.08707 | ITM2C_ENSG00000135916                        |
| 2 | 231730540 | 2.32E+08 | KD2-H4K8ac_peak_18267 | 6.85193  |                                              |
| 2 | 231733135 | 2.32E+08 | KD2-H4K8ac_peak_18268 | 25.8903  |                                              |
| 2 | 231734706 | 2.32E+08 | KD2-H4K8ac_peak_18269 | 8.85813  |                                              |
| 2 | 231851266 | 2.32E+08 | KD2-H4K8ac_peak_18270 | 5.75452  |                                              |
| 2 | 231852338 | 2.32E+08 | KD2-H4K8ac_peak_18271 | 10.02417 |                                              |
| 2 | 231902249 | 2.32E+08 | KD2-H4K8ac_peak_18272 | 14.69247 | C2orf72_ENSG00000204128                      |
| 2 | 231902842 | 2.32E+08 | KD2-H4K8ac_peak_18273 | 7.76104  | C2orf72_ENSG00000204128                      |
| 2 | 231921754 | 2.32E+08 | KD2-H4K8ac_peak_18274 | 7.81657  | PSMD1_ENSG00000173692                        |
| 2 | 232050956 | 2.32E+08 | KD2-H4K8ac_peak_18275 | 5.57044  |                                              |
| 2 | 232056965 | 2.32E+08 | KD2-H4K8ac_peak_18276 | 6.0073   |                                              |
| 2 | 232062442 | 2.32E+08 | KD2-H4K8ac_peak_18277 | 8.74596  | ARMC9_ENSG00000135931                        |
| 2 | 232134736 | 2.32E+08 | KD2-H4K8ac_peak_18278 | 5.30799  |                                              |
| 2 | 232220535 | 2.32E+08 | KD2-H4K8ac_peak_18279 | 11.70879 |                                              |
| 2 | 232222110 | 2.32E+08 | KD2-H4K8ac_peak_18280 | 5.82869  |                                              |
| 2 | 232229524 | 2.32E+08 | KD2-H4K8ac_peak_18281 | 8.58725  |                                              |
| 2 | 232230426 | 2.32E+08 | KD2-H4K8ac_peak_18282 | 7.32463  |                                              |
| 2 | 232235738 | 2.32E+08 | KD2-H4K8ac_peak_18283 | 5.43522  |                                              |
| 2 | 232253049 | 2.32E+08 | KD2-H4K8ac_peak_18284 | 6.99815  | AC017104.6_ENSG00000224376                   |
| 2 | 232260439 | 2.32E+08 | KD2-H4K8ac_peak_18285 | 5.405    | B3GNT7_ENSG00000156966                       |
| 2 | 232264948 | 2.32E+08 | KD2-H4K8ac_peak_18286 | 12.60538 |                                              |
| 2 | 232276783 | 2.32E+08 | KD2-H4K8ac_peak_18287 | 7.36799  |                                              |
| 2 | 232328726 | 2.32E+08 | KD2-H4K8ac_peak_18288 | 7.47462  |                                              |
| 2 | 232329545 | 2.32E+08 | KD2-H4K8ac_peak_18289 | 9.08816  |                                              |
| 2 | 232347425 | 2.32E+08 | KD2-H4K8ac_peak_18290 | 9.26408  | NCL_ENSG00000115053                          |
| 2 | 232379309 | 2.32E+08 | KD2-H4K8ac_peak_18291 | 10.77651 | LINC00471_ENSG00000181798                    |
| 2 | 232394742 | 2.32E+08 | KD2-H4K8ac_peak_18292 | 7.36799  | NMUR1_ENSG00000171596                        |
| 2 | 232395424 | 2.32E+08 | KD2-H4K8ac_peak_18293 | 12.93253 | NMUR1_ENSG00000171596                        |
| 2 | 232459809 | 2.32E+08 | KD2-H4K8ac_peak_18294 | 4.67342  |                                              |
| 2 | 232468614 | 2.32E+08 | KD2-H4K8ac_peak_18295 | 13.22091 |                                              |
| 2 | 232469665 | 2.32E+08 | KD2-H4K8ac_peak_18296 | 11.50346 |                                              |
| 2 | 232477076 | 2.32E+08 | KD2-H4K8ac_peak_18297 | 20.8599  |                                              |
| 2 | 232478020 | 2.32E+08 | KD2-H4K8ac_peak_18298 | 17.70837 |                                              |
| 2 | 232520144 | 2.33E+08 | KD2-H4K8ac_peak_18299 | 8.10216  |                                              |
| 2 | 232544962 | 2.33E+08 | KD2-H4K8ac_peak_18300 | 16.57619 |                                              |
| 2 | 232545982 | 2.33E+08 | KD2-H4K8ac_peak_18301 | 13.22091 |                                              |
| 2 | 232547669 | 2.33E+08 | KD2-H4K8ac_peak_18302 | 15.04266 |                                              |
| 2 | 232552281 | 2.33E+08 | KD2-H4K8ac_peak_18303 | 5.92591  |                                              |
| 2 | 232570873 | 2.33E+08 | KD2-H4K8ac_peak_18304 | 17.84477 | MGC4771_ENSG00000269363;PTMA_ENSG00000187514 |
| 2 | 232572034 | 2.33E+08 | KD2-H4K8ac_peak_18305 | 16.67374 | MGC4771_ENSG00000269363;PTMA_ENSG00000187514 |
| 2 | 232573371 | 2.33E+08 | KD2-H4K8ac_peak_18306 | 12.93209 |                                              |

|   |           |          |                       |          |                                                                              |
|---|-----------|----------|-----------------------|----------|------------------------------------------------------------------------------|
| 2 | 232574835 | 2.33E+08 | KD2-H4K8ac_peak_18307 | 6.25869  |                                                                              |
| 2 | 232645542 | 2.33E+08 | KD2-H4K8ac_peak_18308 | 7.13615  | COPS7B_ENSG00000144524                                                       |
| 2 | 232650668 | 2.33E+08 | KD2-H4K8ac_peak_18309 | 18.31034 | PDE6D_ENSG00000156973                                                        |
| 2 | 232825363 | 2.33E+08 | KD2-H4K8ac_peak_18310 | 5.57044  | DIS3L2_ENSG00000144535                                                       |
| 2 | 232825782 | 2.33E+08 | KD2-H4K8ac_peak_18311 | 13.12288 | DIS3L2_ENSG00000144535                                                       |
| 2 | 233072100 | 2.33E+08 | KD2-H4K8ac_peak_18312 | 5.25071  |                                                                              |
| 2 | 233308801 | 2.33E+08 | KD2-H4K8ac_peak_18313 | 9.16531  |                                                                              |
| 2 | 233367189 | 2.33E+08 | KD2-H4K8ac_peak_18314 | 17.8868  |                                                                              |
| 2 | 233370323 | 2.33E+08 | KD2-H4K8ac_peak_18315 | 4.86324  |                                                                              |
| 2 | 233388765 | 2.33E+08 | KD2-H4K8ac_peak_18316 | 9.16531  |                                                                              |
| 2 | 233397565 | 2.33E+08 | KD2-H4K8ac_peak_18317 | 6.75488  |                                                                              |
| 2 | 233414898 | 2.33E+08 | KD2-H4K8ac_peak_18318 | 14.68449 | TIGD1_ENSG00000221944;EIF4E2_ENSG00000135930;MIR5001_ENSG00000266620         |
| 2 | 233415444 | 2.33E+08 | KD2-H4K8ac_peak_18319 | 15.66774 | TIGD1_ENSG00000221944;EIF4E2_ENSG00000135930;MIR5001_ENSG00000266620         |
| 2 | 233470298 | 2.33E+08 | KD2-H4K8ac_peak_18320 | 16.80494 | EFHD1_ENSG00000115468                                                        |
| 2 | 233497876 | 2.33E+08 | KD2-H4K8ac_peak_18321 | 8.55271  |                                                                              |
| 2 | 233498433 | 2.33E+08 | KD2-H4K8ac_peak_18322 | 7.69287  |                                                                              |
| 2 | 233561160 | 2.34E+08 | KD2-H4K8ac_peak_18323 | 5.61377  | GIGYF2_ENSG00000204120                                                       |
| 2 | 233561581 | 2.34E+08 | KD2-H4K8ac_peak_18324 | 5.14125  | GIGYF2_ENSG00000204120                                                       |
| 2 | 233562077 | 2.34E+08 | KD2-H4K8ac_peak_18325 | 15.61313 | GIGYF2_ENSG00000204120                                                       |
| 2 | 233741009 | 2.34E+08 | KD2-H4K8ac_peak_18326 | 8.30974  |                                                                              |
| 2 | 233926529 | 2.34E+08 | KD2-H4K8ac_peak_18327 | 10.02431 |                                                                              |
| 2 | 234160379 | 2.34E+08 | KD2-H4K8ac_peak_18328 | 8.55271  |                                                                              |
| 2 | 234262207 | 2.34E+08 | KD2-H4K8ac_peak_18329 | 12.81138 | RP11-400N9.1_ENSG00000259793;DGKD_ENSG00000077044;AC019221.4_ENSG00000243637 |
| 2 | 234474890 | 2.34E+08 | KD2-H4K8ac_peak_18330 | 12.74171 | USP40_ENSG00000085982                                                        |
| 2 | 234608645 | 2.35E+08 | KD2-H4K8ac_peak_18331 | 6.16888  |                                                                              |
| 2 | 234762612 | 2.35E+08 | KD2-H4K8ac_peak_18332 | 7.28827  | HJURP_ENSG00000123485                                                        |
| 2 | 234906423 | 2.35E+08 | KD2-H4K8ac_peak_18333 | 4.9025   |                                                                              |
| 2 | 235241988 | 2.35E+08 | KD2-H4K8ac_peak_18334 | 10.0692  |                                                                              |
| 2 | 235242955 | 2.35E+08 | KD2-H4K8ac_peak_18335 | 8.74596  |                                                                              |
| 2 | 235244962 | 2.35E+08 | KD2-H4K8ac_peak_18336 | 10.29344 |                                                                              |
| 2 | 235404065 | 2.35E+08 | KD2-H4K8ac_peak_18337 | 5.14125  |                                                                              |
| 2 | 235405899 | 2.35E+08 | KD2-H4K8ac_peak_18338 | 22.38694 | ARL4C_ENSG00000188042                                                        |
| 2 | 235842090 | 2.36E+08 | KD2-H4K8ac_peak_18339 | 6.16888  |                                                                              |
| 2 | 235860130 | 2.36E+08 | KD2-H4K8ac_peak_18340 | 10.98959 | SH3BP4_ENSG00000130147                                                       |
| 2 | 235908879 | 2.36E+08 | KD2-H4K8ac_peak_18341 | 7.70289  |                                                                              |
| 2 | 235920322 | 2.36E+08 | KD2-H4K8ac_peak_18342 | 7.13615  |                                                                              |
| 2 | 235958521 | 2.36E+08 | KD2-H4K8ac_peak_18343 | 10.96455 |                                                                              |
| 2 | 235960096 | 2.36E+08 | KD2-H4K8ac_peak_18344 | 13.63179 |                                                                              |
| 2 | 236133429 | 2.36E+08 | KD2-H4K8ac_peak_18345 | 5.15777  |                                                                              |
| 2 | 236174288 | 2.36E+08 | KD2-H4K8ac_peak_18346 | 4.77079  |                                                                              |
| 2 | 236401607 | 2.36E+08 | KD2-H4K8ac_peak_18347 | 13.09607 | AGAP1_ENSG00000157985                                                        |
| 2 | 236402777 | 2.36E+08 | KD2-H4K8ac_peak_18348 | 11.14658 | AGAP1_ENSG00000157985                                                        |
| 2 | 236403421 | 2.36E+08 | KD2-H4K8ac_peak_18349 | 4.77079  | AGAP1_ENSG00000157985                                                        |
| 2 | 236413558 | 2.36E+08 | KD2-H4K8ac_peak_18350 | 6.36319  | AGAP1-IT1_ENSG00000235529                                                    |
| 2 | 236567633 | 2.37E+08 | KD2-H4K8ac_peak_18351 | 6.2781   |                                                                              |
| 2 | 236578423 | 2.37E+08 | KD2-H4K8ac_peak_18352 | 7.69294  |                                                                              |

|   |           |          |                       |          |                                                  |
|---|-----------|----------|-----------------------|----------|--------------------------------------------------|
| 2 | 236579257 | 2.37E+08 | KD2-H4K8ac_peak_18353 | 3.91903  |                                                  |
| 2 | 237993937 | 2.38E+08 | KD2-H4K8ac_peak_18354 | 11.03331 | AC105760.2_ENSG00000227252;COPS8_ENSG00000198612 |
| 2 | 238206321 | 2.38E+08 | KD2-H4K8ac_peak_18355 | 5.57044  |                                                  |
| 2 | 238207208 | 2.38E+08 | KD2-H4K8ac_peak_18356 | 5.14125  |                                                  |
| 2 | 238341773 | 2.38E+08 | KD2-H4K8ac_peak_18357 | 13.01932 |                                                  |
| 2 | 238360861 | 2.38E+08 | KD2-H4K8ac_peak_18358 | 11.03212 |                                                  |
| 2 | 238382988 | 2.38E+08 | KD2-H4K8ac_peak_18359 | 16.57619 |                                                  |
| 2 | 238391740 | 2.38E+08 | KD2-H4K8ac_peak_18360 | 4.211    |                                                  |
| 2 | 238535631 | 2.39E+08 | KD2-H4K8ac_peak_18361 | 23.43329 | LRRFIP1_ENSG00000124831                          |
| 2 | 238536289 | 2.39E+08 | KD2-H4K8ac_peak_18362 | 9.63487  | LRRFIP1_ENSG00000124831                          |
| 2 | 238600103 | 2.39E+08 | KD2-H4K8ac_peak_18363 | 8.23274  |                                                  |
| 2 | 238600849 | 2.39E+08 | KD2-H4K8ac_peak_18364 | 8.59579  |                                                  |
| 2 | 238610411 | 2.39E+08 | KD2-H4K8ac_peak_18365 | 6.24114  |                                                  |
| 2 | 238611363 | 2.39E+08 | KD2-H4K8ac_peak_18366 | 6.56211  |                                                  |
| 2 | 238612219 | 2.39E+08 | KD2-H4K8ac_peak_18367 | 5.34636  |                                                  |
| 2 | 238767391 | 2.39E+08 | KD2-H4K8ac_peak_18368 | 16.49944 | RAMP1_ENSG00000132329                            |
| 2 | 238771354 | 2.39E+08 | KD2-H4K8ac_peak_18369 | 6.67092  |                                                  |
| 2 | 238773125 | 2.39E+08 | KD2-H4K8ac_peak_18370 | 7.92775  |                                                  |
| 2 | 238774172 | 2.39E+08 | KD2-H4K8ac_peak_18371 | 10.01478 |                                                  |
| 2 | 238774773 | 2.39E+08 | KD2-H4K8ac_peak_18372 | 6.30229  |                                                  |
| 2 | 238778871 | 2.39E+08 | KD2-H4K8ac_peak_18373 | 7.95563  | SNORD39_ENSG00000263723                          |
| 2 | 238780837 | 2.39E+08 | KD2-H4K8ac_peak_18374 | 5.54647  |                                                  |
| 2 | 238783719 | 2.39E+08 | KD2-H4K8ac_peak_18375 | 5.59859  |                                                  |
| 2 | 238784837 | 2.39E+08 | KD2-H4K8ac_peak_18376 | 14.4458  |                                                  |
| 2 | 238786237 | 2.39E+08 | KD2-H4K8ac_peak_18377 | 7.44324  |                                                  |
| 2 | 238791046 | 2.39E+08 | KD2-H4K8ac_peak_18378 | 14.68449 |                                                  |
| 2 | 238793160 | 2.39E+08 | KD2-H4K8ac_peak_18379 | 27.60769 |                                                  |
| 2 | 238795844 | 2.39E+08 | KD2-H4K8ac_peak_18380 | 5.49478  |                                                  |
| 2 | 238796545 | 2.39E+08 | KD2-H4K8ac_peak_18381 | 6.25869  |                                                  |
| 2 | 238802989 | 2.39E+08 | KD2-H4K8ac_peak_18382 | 14.38934 |                                                  |
| 2 | 238804169 | 2.39E+08 | KD2-H4K8ac_peak_18383 | 10.21366 |                                                  |
| 2 | 238827016 | 2.39E+08 | KD2-H4K8ac_peak_18384 | 6.86812  |                                                  |
| 2 | 238830722 | 2.39E+08 | KD2-H4K8ac_peak_18385 | 5.30799  |                                                  |
| 2 | 238831709 | 2.39E+08 | KD2-H4K8ac_peak_18386 | 9.1707   |                                                  |
| 2 | 238832970 | 2.39E+08 | KD2-H4K8ac_peak_18387 | 10.86378 |                                                  |
| 2 | 238875071 | 2.39E+08 | KD2-H4K8ac_peak_18388 | 10.53377 | UBE2F_ENSG00000184182;UBE2F-SCLY_ENSG00000258984 |
| 2 | 238875700 | 2.39E+08 | KD2-H4K8ac_peak_18389 | 8.30974  | UBE2F_ENSG00000184182;UBE2F-SCLY_ENSG00000258984 |
| 2 | 238968902 | 2.39E+08 | KD2-H4K8ac_peak_18390 | 9.20193  | SCLY_ENSG00000132330                             |
| 2 | 239001935 | 2.39E+08 | KD2-H4K8ac_peak_18391 | 4.52039  |                                                  |
| 2 | 239009152 | 2.39E+08 | KD2-H4K8ac_peak_18392 | 5.47943  | ESPNL_ENSG00000144488                            |
| 2 | 239047323 | 2.39E+08 | KD2-H4K8ac_peak_18393 | 5.51783  | KLHL30_ENSG00000168427                           |
| 2 | 239047942 | 2.39E+08 | KD2-H4K8ac_peak_18394 | 6.14031  | KLHL30_ENSG00000168427                           |
| 2 | 239067621 | 2.39E+08 | KD2-H4K8ac_peak_18395 | 8.85813  | FAM132B_ENSG00000178752                          |
| 2 | 239111725 | 2.39E+08 | KD2-H4K8ac_peak_18396 | 13.80019 | ILKAP_ENSG00000132323                            |
| 2 | 239143152 | 2.39E+08 | KD2-H4K8ac_peak_18397 | 12.10889 |                                                  |
| 2 | 239147661 | 2.39E+08 | KD2-H4K8ac_peak_18398 | 6.60096  |                                                  |

|   |           |          |                       |          |                                                  |
|---|-----------|----------|-----------------------|----------|--------------------------------------------------|
| 2 | 239148919 | 2.39E+08 | KD2-H4K8ac_peak_18399 | 12.08557 | HES6_ENSG00000144485                             |
| 2 | 239149744 | 2.39E+08 | KD2-H4K8ac_peak_18400 | 4.86324  | HES6_ENSG00000144485                             |
| 2 | 239152070 | 2.39E+08 | KD2-H4K8ac_peak_18401 | 4.67342  |                                                  |
| 2 | 239229371 | 2.39E+08 | KD2-H4K8ac_peak_18402 | 7.96322  | TRAF3IP1_ENSG00000204104                         |
| 2 | 239335142 | 2.39E+08 | KD2-H4K8ac_peak_18403 | 15.2334  | ASB1_ENSG00000065802;AC016999.2_ENSG00000229915  |
| 2 | 239431595 | 2.39E+08 | KD2-H4K8ac_peak_18404 | 7.40111  |                                                  |
| 2 | 239432073 | 2.39E+08 | KD2-H4K8ac_peak_18405 | 7.36799  |                                                  |
| 2 | 239756166 | 2.4E+08  | KD2-H4K8ac_peak_18406 | 9.36621  | TWIST2_ENSG00000233608                           |
| 2 | 239957240 | 2.4E+08  | KD2-H4K8ac_peak_18407 | 11.05467 |                                                  |
| 2 | 239983554 | 2.4E+08  | KD2-H4K8ac_peak_18408 | 3.75035  |                                                  |
| 2 | 240000412 | 2.4E+08  | KD2-H4K8ac_peak_18409 | 4.42765  |                                                  |
| 2 | 240003770 | 2.4E+08  | KD2-H4K8ac_peak_18410 | 11.86082 |                                                  |
| 2 | 240004486 | 2.4E+08  | KD2-H4K8ac_peak_18411 | 5.57044  |                                                  |
| 2 | 240014764 | 2.4E+08  | KD2-H4K8ac_peak_18412 | 8.53092  |                                                  |
| 2 | 240015802 | 2.4E+08  | KD2-H4K8ac_peak_18413 | 6.35843  |                                                  |
| 2 | 240018463 | 2.4E+08  | KD2-H4K8ac_peak_18414 | 10.61986 |                                                  |
| 2 | 240019023 | 2.4E+08  | KD2-H4K8ac_peak_18415 | 5.88845  |                                                  |
| 2 | 240134274 | 2.4E+08  | KD2-H4K8ac_peak_18416 | 3.75035  |                                                  |
| 2 | 240161047 | 2.4E+08  | KD2-H4K8ac_peak_18417 | 4.80593  |                                                  |
| 2 | 240162628 | 2.4E+08  | KD2-H4K8ac_peak_18418 | 8.10216  |                                                  |
| 2 | 240174023 | 2.4E+08  | KD2-H4K8ac_peak_18419 | 5.14125  |                                                  |
| 2 | 240184364 | 2.4E+08  | KD2-H4K8ac_peak_18420 | 4.42765  |                                                  |
| 2 | 240187072 | 2.4E+08  | KD2-H4K8ac_peak_18421 | 3.75035  |                                                  |
| 2 | 240196295 | 2.4E+08  | KD2-H4K8ac_peak_18422 | 5.51783  |                                                  |
| 2 | 240196827 | 2.4E+08  | KD2-H4K8ac_peak_18423 | 10.29842 |                                                  |
| 2 | 240197804 | 2.4E+08  | KD2-H4K8ac_peak_18424 | 25.8903  |                                                  |
| 2 | 240198443 | 2.4E+08  | KD2-H4K8ac_peak_18425 | 17.19888 |                                                  |
| 2 | 240231567 | 2.4E+08  | KD2-H4K8ac_peak_18426 | 4.8888   |                                                  |
| 2 | 240251007 | 2.4E+08  | KD2-H4K8ac_peak_18427 | 5.54647  |                                                  |
| 2 | 240270683 | 2.4E+08  | KD2-H4K8ac_peak_18428 | 6.25869  |                                                  |
| 2 | 240323099 | 2.4E+08  | KD2-H4K8ac_peak_18429 | 8.58725  | HDAC4_ENSG00000068024;AC062017.1_ENSG00000222020 |
| 2 | 240508890 | 2.41E+08 | KD2-H4K8ac_peak_18430 | 4.12757  |                                                  |
| 2 | 240597895 | 2.41E+08 | KD2-H4K8ac_peak_18431 | 5.54647  |                                                  |
| 2 | 240639029 | 2.41E+08 | KD2-H4K8ac_peak_18432 | 4.67342  |                                                  |
| 2 | 240648270 | 2.41E+08 | KD2-H4K8ac_peak_18433 | 5.75452  |                                                  |
| 2 | 240964835 | 2.41E+08 | KD2-H4K8ac_peak_18434 | 20.88898 | NDUFA10_ENSG00000130414                          |
| 2 | 241075807 | 2.41E+08 | KD2-H4K8ac_peak_18435 | 9.95119  | MYEOV2_ENSG00000172428                           |
| 2 | 241083465 | 2.41E+08 | KD2-H4K8ac_peak_18436 | 6.40683  | OTOS_ENSG00000178602                             |
| 2 | 241190273 | 2.41E+08 | KD2-H4K8ac_peak_18437 | 5.54647  |                                                  |
| 2 | 241198412 | 2.41E+08 | KD2-H4K8ac_peak_18438 | 6.0073   |                                                  |
| 2 | 241247482 | 2.41E+08 | KD2-H4K8ac_peak_18439 | 6.47635  |                                                  |
| 2 | 241289224 | 2.41E+08 | KD2-H4K8ac_peak_18440 | 5.08628  |                                                  |
| 2 | 241290940 | 2.41E+08 | KD2-H4K8ac_peak_18441 | 5.75757  |                                                  |
| 2 | 241292311 | 2.41E+08 | KD2-H4K8ac_peak_18442 | 10.96455 |                                                  |
| 2 | 241374270 | 2.41E+08 | KD2-H4K8ac_peak_18443 | 11.82518 | GPC1_ENSG00000063660                             |
| 2 | 241391372 | 2.41E+08 | KD2-H4K8ac_peak_18444 | 15.19879 | AC110619.1_ENSG00000255735                       |

|   |           |          |                       |          |                                                   |
|---|-----------|----------|-----------------------|----------|---------------------------------------------------|
| 2 | 241499857 | 2.42E+08 | KD2-H4K8ac_peak_18445 | 9.48511  | DUSP28_ENSG00000188542                            |
| 2 | 241505631 | 2.42E+08 | KD2-H4K8ac_peak_18446 | 12.74171 | RNPEPL1_ENSG00000142327                           |
| 2 | 241506119 | 2.42E+08 | KD2-H4K8ac_peak_18447 | 5.14125  | RNPEPL1_ENSG00000142327                           |
| 2 | 241507302 | 2.42E+08 | KD2-H4K8ac_peak_18448 | 10.50587 | ANKMY1_ENSG00000144504                            |
| 2 | 241507981 | 2.42E+08 | KD2-H4K8ac_peak_18449 | 12.96672 | ANKMY1_ENSG00000144504                            |
| 2 | 241525799 | 2.42E+08 | KD2-H4K8ac_peak_18450 | 13.83097 | CAPN10-AS1_ENSG00000260942;CAPN10_ENSG00000142330 |
| 2 | 241562219 | 2.42E+08 | KD2-H4K8ac_peak_18451 | 7.19807  |                                                   |
| 2 | 241760169 | 2.42E+08 | KD2-H4K8ac_peak_18452 | 17.16047 | KIF1A_ENSG00000130294                             |
| 2 | 241771130 | 2.42E+08 | KD2-H4K8ac_peak_18453 | 6.13909  |                                                   |
| 2 | 241842273 | 2.42E+08 | KD2-H4K8ac_peak_18454 | 5.20908  |                                                   |
| 2 | 241853336 | 2.42E+08 | KD2-H4K8ac_peak_18455 | 5.53033  |                                                   |
| 2 | 241856256 | 2.42E+08 | KD2-H4K8ac_peak_18456 | 5.88845  |                                                   |
| 2 | 241897186 | 2.42E+08 | KD2-H4K8ac_peak_18457 | 5.30799  |                                                   |
| 2 | 241899949 | 2.42E+08 | KD2-H4K8ac_peak_18458 | 8.59579  |                                                   |
| 2 | 241902034 | 2.42E+08 | KD2-H4K8ac_peak_18459 | 6.65673  |                                                   |
| 2 | 241904896 | 2.42E+08 | KD2-H4K8ac_peak_18460 | 5.57044  |                                                   |
| 2 | 241937577 | 2.42E+08 | KD2-H4K8ac_peak_18461 | 8.17557  | SNED1_ENSG00000162804                             |
| 2 | 241949050 | 2.42E+08 | KD2-H4K8ac_peak_18462 | 14.05403 | AC093585.6_ENSG00000229996                        |
| 2 | 242041505 | 2.42E+08 | KD2-H4K8ac_peak_18463 | 9.95119  | MTERFD2_ENSG00000122085                           |
| 2 | 242088599 | 2.42E+08 | KD2-H4K8ac_peak_18464 | 7.40111  | PASK_ENSG00000115687;PPP1R7_ENSG00000115685       |
| 2 | 242089980 | 2.42E+08 | KD2-H4K8ac_peak_18465 | 13.95627 | PASK_ENSG00000115687;PPP1R7_ENSG00000115685       |
| 2 | 242156971 | 2.42E+08 | KD2-H4K8ac_peak_18466 | 4.44527  |                                                   |
| 2 | 242162959 | 2.42E+08 | KD2-H4K8ac_peak_18467 | 5.88845  |                                                   |
| 2 | 242211563 | 2.42E+08 | KD2-H4K8ac_peak_18468 | 4.42765  |                                                   |
| 2 | 242212364 | 2.42E+08 | KD2-H4K8ac_peak_18469 | 5.88845  |                                                   |
| 2 | 242244592 | 2.42E+08 | KD2-H4K8ac_peak_18470 | 6.67081  |                                                   |
| 2 | 242254182 | 2.42E+08 | KD2-H4K8ac_peak_18471 | 6.8713   | SEPT2_ENSG00000168385                             |
| 2 | 242254800 | 2.42E+08 | KD2-H4K8ac_peak_18472 | 10.43145 | SEPT2_ENSG00000168385                             |
| 2 | 242255386 | 2.42E+08 | KD2-H4K8ac_peak_18473 | 8.55271  | HDLBP_ENSG00000115677;SEPT2_ENSG00000168385       |
| 2 | 242294638 | 2.42E+08 | KD2-H4K8ac_peak_18474 | 10.05606 | FARP2_ENSG00000006607                             |
| 2 | 242295814 | 2.42E+08 | KD2-H4K8ac_peak_18475 | 7.47462  | FARP2_ENSG00000006607                             |
| 2 | 242447718 | 2.42E+08 | KD2-H4K8ac_peak_18476 | 10.96455 |                                                   |
| 2 | 242448310 | 2.42E+08 | KD2-H4K8ac_peak_18477 | 13.35993 | STK25_ENSG00000115694                             |
| 2 | 242480391 | 2.42E+08 | KD2-H4K8ac_peak_18478 | 7.79898  |                                                   |
| 2 | 242498216 | 2.42E+08 | KD2-H4K8ac_peak_18479 | 7.76335  | BOK-AS1_ENSG00000234235;BOK_ENSG00000176720       |
| 2 | 242576184 | 2.43E+08 | KD2-H4K8ac_peak_18480 | 13.62318 | THAP4_ENSG00000176946;ATG4B_ENSG00000168397       |
| 2 | 242625759 | 2.43E+08 | KD2-H4K8ac_peak_18481 | 9.11891  | DTYMK_ENSG00000168393                             |
| 2 | 242626519 | 2.43E+08 | KD2-H4K8ac_peak_18482 | 15.69572 | DTYMK_ENSG00000168393                             |
| 2 | 242640449 | 2.43E+08 | KD2-H4K8ac_peak_18483 | 9.73431  | ING5_ENSG00000168395                              |
| 2 | 242640954 | 2.43E+08 | KD2-H4K8ac_peak_18484 | 7.28827  | ING5_ENSG00000168395                              |
| 2 | 242668047 | 2.43E+08 | KD2-H4K8ac_peak_18485 | 7.01658  |                                                   |
| 2 | 242673450 | 2.43E+08 | KD2-H4K8ac_peak_18486 | 5.4779   | D2HGDH_ENSG00000180902                            |
| 2 | 242674121 | 2.43E+08 | KD2-H4K8ac_peak_18487 | 8.4716   | D2HGDH_ENSG00000180902;AC114730.8_ENSG00000215692 |
| 2 | 242703878 | 2.43E+08 | KD2-H4K8ac_peak_18488 | 10.0692  |                                                   |
| 2 | 242707239 | 2.43E+08 | KD2-H4K8ac_peak_18489 | 5.1313   |                                                   |
| 2 | 242714241 | 2.43E+08 | KD2-H4K8ac_peak_18490 | 12.06346 |                                                   |

|    |           |          |                       |          |                                                    |
|----|-----------|----------|-----------------------|----------|----------------------------------------------------|
| 2  | 242737136 | 2.43E+08 | KD2-H4K8ac_peak_18491 | 5.64449  |                                                    |
| 2  | 242741242 | 2.43E+08 | KD2-H4K8ac_peak_18492 | 5.14125  | AC114730.5_ENSG00000215023                         |
| 2  | 242742145 | 2.43E+08 | KD2-H4K8ac_peak_18493 | 6.99815  | AC114730.5_ENSG00000215023                         |
| 2  | 242743045 | 2.43E+08 | KD2-H4K8ac_peak_18494 | 20.18584 |                                                    |
| 2  | 242749275 | 2.43E+08 | KD2-H4K8ac_peak_18495 | 6.16888  | NEU4_ENSG00000204099                               |
| 2  | 242749712 | 2.43E+08 | KD2-H4K8ac_peak_18496 | 9.95119  | NEU4_ENSG00000204099                               |
| 2  | 242750560 | 2.43E+08 | KD2-H4K8ac_peak_18497 | 12.36441 | AC114730.3_ENSG00000224272;NEU4_ENSG00000204099    |
| 2  | 242785800 | 2.43E+08 | KD2-H4K8ac_peak_18498 | 11.30637 | AC114730.2_ENSG00000235151                         |
| 2  | 242786268 | 2.43E+08 | KD2-H4K8ac_peak_18499 | 16.32216 | AC114730.2_ENSG00000235151                         |
| 2  | 242796248 | 2.43E+08 | KD2-H4K8ac_peak_18500 | 8.55271  |                                                    |
| 2  | 242800640 | 2.43E+08 | KD2-H4K8ac_peak_18501 | 7.07117  | PDCD1_ENSG00000188389                              |
| 2  | 242810333 | 2.43E+08 | KD2-H4K8ac_peak_18502 | 4.66652  |                                                    |
| 2  | 242810841 | 2.43E+08 | KD2-H4K8ac_peak_18503 | 4.70388  | CXXC11_ENSG00000188011                             |
| 2  | 242822648 | 2.43E+08 | KD2-H4K8ac_peak_18504 | 22.18958 | AC131097.3_ENSG00000233806                         |
| 2  | 243011195 | 2.43E+08 | KD2-H4K8ac_peak_18505 | 9.11031  |                                                    |
| 20 | 247324    | 247977   | KD2-H4K8ac_peak_18506 | 4.54006  | RP5-1103G7.10_ENSG00000272874                      |
| 20 | 270719    | 270961   | KD2-H4K8ac_peak_18507 | 10.21502 | C20orf96_ENSG00000196476                           |
| 20 | 278281    | 278925   | KD2-H4K8ac_peak_18508 | 9.07715  | ZCCHC3_ENSG00000177764;AL034548.1_ENSG00000247315  |
| 20 | 290439    | 291139   | KD2-H4K8ac_peak_18509 | 11.89502 |                                                    |
| 20 | 306316    | 306865   | KD2-H4K8ac_peak_18510 | 10.96455 | SOX12_ENSG00000177732                              |
| 20 | 307114    | 307591   | KD2-H4K8ac_peak_18511 | 6.25869  | SOX12_ENSG00000177732                              |
| 20 | 327244    | 328298   | KD2-H4K8ac_peak_18512 | 17.19888 | RP5-1103G7.4_ENSG00000225377;NRSN2_ENSG00000125841 |
| 20 | 328595    | 328904   | KD2-H4K8ac_peak_18513 | 16.64426 | RP5-1103G7.4_ENSG00000225377                       |
| 20 | 340849    | 341189   | KD2-H4K8ac_peak_18514 | 4.77079  |                                                    |
| 20 | 343084    | 343442   | KD2-H4K8ac_peak_18515 | 4.42765  |                                                    |
| 20 | 344123    | 344566   | KD2-H4K8ac_peak_18516 | 6.00226  |                                                    |
| 20 | 361453    | 362566   | KD2-H4K8ac_peak_18517 | 12.00597 | TRIB3_ENSG00000101255                              |
| 20 | 388708    | 389619   | KD2-H4K8ac_peak_18518 | 18.80403 | RBCK1_ENSG00000125826                              |
| 20 | 524047    | 524631   | KD2-H4K8ac_peak_18519 | 15.61313 | CSNK2A1_ENSG00000101266                            |
| 20 | 524877    | 525207   | KD2-H4K8ac_peak_18520 | 10.33529 | CSNK2A1_ENSG00000101266                            |
| 20 | 633418    | 634004   | KD2-H4K8ac_peak_18521 | 13.2669  | SRXN1_ENSG00000271303                              |
| 20 | 655787    | 656325   | KD2-H4K8ac_peak_18522 | 8.59579  | RP5-850E9.3_ENSG00000270299;SCRT2_ENSG00000215397  |
| 20 | 656864    | 657097   | KD2-H4K8ac_peak_18523 | 7.8711   | RP5-850E9.3_ENSG00000270299;SCRT2_ENSG00000215397  |
| 20 | 657454    | 657704   | KD2-H4K8ac_peak_18524 | 7.13615  | SCRT2_ENSG00000215397                              |
| 20 | 680202    | 680522   | KD2-H4K8ac_peak_18525 | 5.61067  |                                                    |
| 20 | 680868    | 681062   | KD2-H4K8ac_peak_18526 | 5.30799  |                                                    |
| 20 | 690005    | 690330   | KD2-H4K8ac_peak_18527 | 5.32137  |                                                    |
| 20 | 690646    | 690894   | KD2-H4K8ac_peak_18528 | 8.30974  |                                                    |
| 20 | 708652    | 708996   | KD2-H4K8ac_peak_18529 | 3.90565  |                                                    |
| 20 | 814324    | 814555   | KD2-H4K8ac_peak_18530 | 14.8083  | FAM110A_ENSG00000125898                            |
| 20 | 825419    | 826087   | KD2-H4K8ac_peak_18531 | 12.30509 |                                                    |
| 20 | 982961    | 983246   | KD2-H4K8ac_peak_18532 | 9.11031  | RSPO4_ENSG00000101282                              |
| 20 | 1099257   | 1099862  | KD2-H4K8ac_peak_18533 | 19.9503  |                                                    |
| 20 | 1165571   | 1166004  | KD2-H4K8ac_peak_18534 | 5.82799  | TMEM74B_ENSG00000125895                            |
| 20 | 1206017   | 1206256  | KD2-H4K8ac_peak_18535 | 7.27716  | RAD21L1_ENSG00000244588                            |
| 20 | 1206860   | 1207225  | KD2-H4K8ac_peak_18536 | 12.32214 | RAD21L1_ENSG00000244588                            |

|    |         |         |                       |          |                                                                        |
|----|---------|---------|-----------------------|----------|------------------------------------------------------------------------|
| 20 | 1246552 | 1246777 | KD2-H4K8ac_peak_18537 | 5.57044  | SNPH_ENSG00000101298                                                   |
| 20 | 1256005 | 1256261 | KD2-H4K8ac_peak_18538 | 4.42765  |                                                                        |
| 20 | 1294032 | 1294243 | KD2-H4K8ac_peak_18539 | 6.66692  |                                                                        |
| 20 | 1306111 | 1306500 | KD2-H4K8ac_peak_18540 | 14.56955 | SDCBP2-AS1_ENSG00000234684                                             |
| 20 | 1374244 | 1374444 | KD2-H4K8ac_peak_18541 | 11.2938  | FKBP1A_ENSG00000088832                                                 |
| 20 | 1447093 | 1447460 | KD2-H4K8ac_peak_18542 | 11.89502 |                                                                        |
| 20 | 1447952 | 1448155 | KD2-H4K8ac_peak_18543 | 9.02573  |                                                                        |
| 20 | 1757614 | 1757837 | KD2-H4K8ac_peak_18544 | 8.83582  |                                                                        |
| 20 | 1875077 | 1875704 | KD2-H4K8ac_peak_18545 | 7.47462  | SIRPA_ENSG00000198053                                                  |
| 20 | 2082489 | 2084037 | KD2-H4K8ac_peak_18546 | 9.6247   | STK35_ENSG00000125834                                                  |
| 20 | 2187588 | 2188133 | KD2-H4K8ac_peak_18547 | 8.86099  | RP11-128M1.1_ENSG00000226644                                           |
| 20 | 2329187 | 2329454 | KD2-H4K8ac_peak_18548 | 6.07178  |                                                                        |
| 20 | 2450764 | 2451406 | KD2-H4K8ac_peak_18549 | 12.30509 | SNRPB_ENSG00000125835                                                  |
| 20 | 2489034 | 2489671 | KD2-H4K8ac_peak_18550 | 8.55271  | RP4-734P14.4_ENSG00000256566                                           |
| 20 | 2489903 | 2490289 | KD2-H4K8ac_peak_18551 | 7.76104  | RP4-734P14.4_ENSG00000256566                                           |
| 20 | 2505200 | 2505874 | KD2-H4K8ac_peak_18552 | 17.8868  | ZNF343_ENSG00000088876                                                 |
| 20 | 2515101 | 2515737 | KD2-H4K8ac_peak_18553 | 9.36516  |                                                                        |
| 20 | 2632523 | 2633046 | KD2-H4K8ac_peak_18554 | 16.32216 | NOP56_ENSG00000101361;MIR1292_ENSG00000221062                          |
| 20 | 2633470 | 2633970 | KD2-H4K8ac_peak_18555 | 10.1591  | NOP56_ENSG00000101361;MIR1292_ENSG00000221062;SNORD110_ENSG00000221116 |
| 20 | 2644339 | 2644769 | KD2-H4K8ac_peak_18556 | 5.13615  | IDH3B_ENSG00000101365;RP4-686C3.7_ENSG00000228293                      |
| 20 | 2645004 | 2645354 | KD2-H4K8ac_peak_18557 | 6.27931  | IDH3B_ENSG00000101365;RP4-686C3.7_ENSG00000228293                      |
| 20 | 2672518 | 2673262 | KD2-H4K8ac_peak_18558 | 14.15075 | EBF4_ENSG00000088881                                                   |
| 20 | 2673539 | 2673826 | KD2-H4K8ac_peak_18559 | 5.88562  | EBF4_ENSG00000088881                                                   |
| 20 | 2780017 | 2780444 | KD2-H4K8ac_peak_18560 | 6.25869  | CPXM1_ENSG00000088882                                                  |
| 20 | 2780752 | 2781204 | KD2-H4K8ac_peak_18561 | 10.7186  | CPXM1_ENSG00000088882                                                  |
| 20 | 2781791 | 2782369 | KD2-H4K8ac_peak_18562 | 10.05606 | CPXM1_ENSG00000088882                                                  |
| 20 | 2820368 | 2821280 | KD2-H4K8ac_peak_18563 | 25.6154  | PCED1A_ENSG00000132635;VPS16_ENSG00000215305                           |
| 20 | 2852933 | 2854618 | KD2-H4K8ac_peak_18564 | 13.09607 |                                                                        |
| 20 | 3026154 | 3026538 | KD2-H4K8ac_peak_18565 | 7.11824  | MRPS26_ENSG00000125901                                                 |
| 20 | 3026753 | 3027439 | KD2-H4K8ac_peak_18566 | 7.07117  | MRPS26_ENSG00000125901                                                 |
| 20 | 3140187 | 3140490 | KD2-H4K8ac_peak_18567 | 11.03331 | UBOX5_ENSG00000185019;FASTKD5_ENSG00000215251                          |
| 20 | 3140709 | 3140930 | KD2-H4K8ac_peak_18568 | 6.25869  | UBOX5_ENSG00000185019;FASTKD5_ENSG00000215251                          |
| 20 | 3183899 | 3184196 | KD2-H4K8ac_peak_18569 | 4.211    |                                                                        |
| 20 | 3184415 | 3185247 | KD2-H4K8ac_peak_18570 | 14.84212 | DDRGK1_ENSG00000198171                                                 |
| 20 | 3190137 | 3190808 | KD2-H4K8ac_peak_18571 | 6.40297  | ITPA_ENSG00000125877                                                   |
| 20 | 3219962 | 3220226 | KD2-H4K8ac_peak_18572 | 7.43893  | SLC4A11_ENSG00000088836                                                |
| 20 | 3321268 | 3321519 | KD2-H4K8ac_peak_18573 | 9.1707   |                                                                        |
| 20 | 3387887 | 3388237 | KD2-H4K8ac_peak_18574 | 8.17902  | C20orf194_ENSG00000088854                                              |
| 20 | 3451048 | 3451483 | KD2-H4K8ac_peak_18575 | 5.59859  | ATRN_ENSG00000088812                                                   |
| 20 | 3660099 | 3660434 | KD2-H4K8ac_peak_18576 | 5.557    |                                                                        |
| 20 | 3729893 | 3730460 | KD2-H4K8ac_peak_18577 | 7.51054  |                                                                        |
| 20 | 3748709 | 3749317 | KD2-H4K8ac_peak_18578 | 13.87818 | C20orf27_ENSG00000101220                                               |
| 20 | 3758203 | 3759395 | KD2-H4K8ac_peak_18579 | 12.08081 |                                                                        |
| 20 | 3766541 | 3766860 | KD2-H4K8ac_peak_18580 | 9.89126  | CENPB_ENSG00000125817;CDC25B_ENSG00000101224                           |
| 20 | 3776121 | 3776782 | KD2-H4K8ac_peak_18581 | 7.92775  |                                                                        |
| 20 | 3777114 | 3777712 | KD2-H4K8ac_peak_18582 | 11.86082 |                                                                        |



|    |         |         |                       |          |                                                     |
|----|---------|---------|-----------------------|----------|-----------------------------------------------------|
| 20 | 3788199 | 3788976 | KD2-H4K8ac_peak_18583 | 8.85813  |                                                     |
| 20 | 3791328 | 3791587 | KD2-H4K8ac_peak_18584 | 5.57044  |                                                     |
| 20 | 3792689 | 3793396 | KD2-H4K8ac_peak_18585 | 11.39383 |                                                     |
| 20 | 3799439 | 3799697 | KD2-H4K8ac_peak_18586 | 7.48133  |                                                     |
| 20 | 3800905 | 3801378 | KD2-H4K8ac_peak_18587 | 15.57998 | AP5S1_ENSG00000125843                               |
| 20 | 3826858 | 3827295 | KD2-H4K8ac_peak_18588 | 9.34195  | MAVS_ENSG00000088888                                |
| 20 | 3827578 | 3827917 | KD2-H4K8ac_peak_18589 | 6.20982  | MAVS_ENSG00000088888                                |
| 20 | 3868752 | 3869741 | KD2-H4K8ac_peak_18590 | 20.97251 | RP11-119B16.2_ENSG00000229539;PANK2_ENSG00000125779 |
| 20 | 3870118 | 3870378 | KD2-H4K8ac_peak_18591 | 9.01262  | RP11-119B16.2_ENSG00000229539;PANK2_ENSG00000125779 |
| 20 | 4066127 | 4066473 | KD2-H4K8ac_peak_18592 | 14.8083  |                                                     |
| 20 | 4128991 | 4129309 | KD2-H4K8ac_peak_18593 | 9.11031  |                                                     |
| 20 | 4129818 | 4130232 | KD2-H4K8ac_peak_18594 | 4.67342  |                                                     |
| 20 | 4148138 | 4148337 | KD2-H4K8ac_peak_18595 | 5.75452  |                                                     |
| 20 | 4152614 | 4153245 | KD2-H4K8ac_peak_18596 | 8.85813  |                                                     |
| 20 | 4667300 | 4667502 | KD2-H4K8ac_peak_18597 | 6.90231  | PRNP_ENSG00000171867                                |
| 20 | 4741435 | 4741999 | KD2-H4K8ac_peak_18598 | 18.5703  |                                                     |
| 20 | 4803880 | 4804175 | KD2-H4K8ac_peak_18599 | 10.05606 | RASSF2_ENSG00000101265                              |
| 20 | 4804529 | 4804856 | KD2-H4K8ac_peak_18600 | 7.28628  | RASSF2_ENSG00000101265                              |
| 20 | 5093037 | 5094142 | KD2-H4K8ac_peak_18601 | 10.05606 | TMEM230_ENSG00000089063;Y_RNA_ENSG00000252367       |
| 20 | 5100248 | 5100534 | KD2-H4K8ac_peak_18602 | 5.30799  |                                                     |
| 20 | 5107665 | 5108048 | KD2-H4K8ac_peak_18603 | 4.86324  | PCNA_ENSG00000132646;CDS2_ENSG00000101290           |
| 20 | 5277440 | 5277643 | KD2-H4K8ac_peak_18604 | 4.01115  |                                                     |
| 20 | 5285720 | 5285945 | KD2-H4K8ac_peak_18605 | 7.40111  |                                                     |
| 20 | 5372960 | 5373571 | KD2-H4K8ac_peak_18606 | 5.88845  |                                                     |
| 20 | 5391882 | 5392758 | KD2-H4K8ac_peak_18607 | 8.25022  |                                                     |
| 20 | 5429511 | 5429759 | KD2-H4K8ac_peak_18608 | 5.15777  |                                                     |
| 20 | 5484801 | 5485258 | KD2-H4K8ac_peak_18609 | 5.57044  | LINC00654_ENSG00000205181                           |
| 20 | 5591082 | 5591551 | KD2-H4K8ac_peak_18610 | 20.5798  | GPCPD1_ENSG00000125772                              |
| 20 | 5591856 | 5592140 | KD2-H4K8ac_peak_18611 | 6.90231  | GPCPD1_ENSG00000125772                              |
| 20 | 5730298 | 5731001 | KD2-H4K8ac_peak_18612 | 10.43145 | C20orf196_ENSG00000171984                           |
| 20 | 5731202 | 5732078 | KD2-H4K8ac_peak_18613 | 8.17902  | C20orf196_ENSG00000171984                           |
| 20 | 5787579 | 5787778 | KD2-H4K8ac_peak_18614 | 7.44366  |                                                     |
| 20 | 5810845 | 5811223 | KD2-H4K8ac_peak_18615 | 4.59928  |                                                     |
| 20 | 5891709 | 5891944 | KD2-H4K8ac_peak_18616 | 9.11031  | CHGB_ENSG00000089199                                |
| 20 | 5892193 | 5892552 | KD2-H4K8ac_peak_18617 | 18.41184 | CHGB_ENSG00000089199                                |
| 20 | 5930898 | 5931097 | KD2-H4K8ac_peak_18618 | 12.06346 | TRMT6_ENSG00000089195;MCM8_ENSG00000125885          |
| 20 | 5986839 | 5987205 | KD2-H4K8ac_peak_18619 | 7.36799  | CRLS1_ENSG00000088766                               |
| 20 | 7999925 | 8000338 | KD2-H4K8ac_peak_18620 | 20.02161 | TMX4_ENSG00000125827;RP5-971N18.3_ENSG00000229766   |
| 20 | 8001679 | 8001872 | KD2-H4K8ac_peak_18621 | 4.01115  |                                                     |
| 20 | 8112887 | 8113376 | KD2-H4K8ac_peak_18622 | 13.36684 | PLCB1_ENSG00000182621                               |
| 20 | 8412480 | 8412729 | KD2-H4K8ac_peak_18623 | 11.86708 |                                                     |
| 20 | 8625077 | 8625272 | KD2-H4K8ac_peak_18624 | 4.11746  |                                                     |
| 20 | 9047965 | 9048329 | KD2-H4K8ac_peak_18625 | 12.06346 | AL121898.1_ENSG00000252819                          |
| 20 | 9048893 | 9049362 | KD2-H4K8ac_peak_18626 | 15.13261 | PLCB4_ENSG00000101333                               |
| 20 | 9145633 | 9145851 | KD2-H4K8ac_peak_18627 | 5.25071  |                                                     |
| 20 | 9495118 | 9495327 | KD2-H4K8ac_peak_18628 | 7.01964  | RP5-1119D9.4_ENSG00000225988;LAMP5_ENSG00000125869  |

|    |          |          |                       |          |                                                     |
|----|----------|----------|-----------------------|----------|-----------------------------------------------------|
| 20 | 9496275  | 9497015  | KD2-H4K8ac_peak_18629 | 6.65673  | RP5-1119D9.4_ENSG00000225988                        |
| 20 | 9497241  | 9497536  | KD2-H4K8ac_peak_18630 | 5.88845  |                                                     |
| 20 | 10015772 | 10016052 | KD2-H4K8ac_peak_18631 | 5.9696   |                                                     |
| 20 | 10198382 | 10198648 | KD2-H4K8ac_peak_18632 | 5.30799  | SNAP25_ENSG00000132639                              |
| 20 | 10258369 | 10258607 | KD2-H4K8ac_peak_18633 | 7.12754  |                                                     |
| 20 | 10288337 | 10288640 | KD2-H4K8ac_peak_18634 | 4.54838  |                                                     |
| 20 | 10291110 | 10291512 | KD2-H4K8ac_peak_18635 | 4.59928  |                                                     |
| 20 | 10414309 | 10414863 | KD2-H4K8ac_peak_18636 | 11.66477 | MKKS_ENSG00000125863                                |
| 20 | 10415954 | 10416176 | KD2-H4K8ac_peak_18637 | 9.08816  | SLX4IP_ENSG00000149346                              |
| 20 | 10531270 | 10531483 | KD2-H4K8ac_peak_18638 | 4.01115  |                                                     |
| 20 | 10617254 | 10617462 | KD2-H4K8ac_peak_18639 | 6.56926  |                                                     |
| 20 | 10623017 | 10623218 | KD2-H4K8ac_peak_18640 | 4.47369  |                                                     |
| 20 | 10624566 | 10624808 | KD2-H4K8ac_peak_18641 | 10.19949 |                                                     |
| 20 | 10632050 | 10632527 | KD2-H4K8ac_peak_18642 | 5.05318  |                                                     |
| 20 | 10633124 | 10633381 | KD2-H4K8ac_peak_18643 | 4.98072  |                                                     |
| 20 | 10652282 | 10652589 | KD2-H4K8ac_peak_18644 | 7.27716  | RP11-103J8.1_ENSG00000270792                        |
| 20 | 10655196 | 10655737 | KD2-H4K8ac_peak_18645 | 8.94469  | JAG1_ENSG00000101384                                |
| 20 | 11871611 | 11872268 | KD2-H4K8ac_peak_18646 | 10.43145 | BTBD3_ENSG00000132640                               |
| 20 | 13619163 | 13619513 | KD2-H4K8ac_peak_18647 | 4.86324  | TASPI1_ENSG00000089123                              |
| 20 | 13619754 | 13620039 | KD2-H4K8ac_peak_18648 | 8.37231  | TASPI1_ENSG00000089123                              |
| 20 | 13765676 | 13766160 | KD2-H4K8ac_peak_18649 | 14.43704 | ESF1_ENSG00000089048;NDUFAF5_ENSG00000101247        |
| 20 | 13975508 | 13975860 | KD2-H4K8ac_peak_18650 | 5.13615  | MACROD2_ENSG00000172264                             |
| 20 | 14207993 | 14208216 | KD2-H4K8ac_peak_18651 | 4.37708  |                                                     |
| 20 | 16330972 | 16331289 | KD2-H4K8ac_peak_18652 | 10.0692  |                                                     |
| 20 | 16553803 | 16554002 | KD2-H4K8ac_peak_18653 | 9.36516  | KIF16B_ENSG00000089177                              |
| 20 | 16628078 | 16628325 | KD2-H4K8ac_peak_18654 | 8.09303  |                                                     |
| 20 | 16633324 | 16633727 | KD2-H4K8ac_peak_18655 | 5.14125  |                                                     |
| 20 | 16635092 | 16635437 | KD2-H4K8ac_peak_18656 | 6.40683  |                                                     |
| 20 | 16709982 | 16710503 | KD2-H4K8ac_peak_18657 | 16.54162 | SNRPB2_ENSG00000125870                              |
| 20 | 16710709 | 16711286 | KD2-H4K8ac_peak_18658 | 15.01306 | SNRPB2_ENSG00000125870;RP4-705D16.3_ENSG00000228809 |
| 20 | 17485019 | 17485232 | KD2-H4K8ac_peak_18659 | 8.85813  |                                                     |
| 20 | 17485867 | 17486238 | KD2-H4K8ac_peak_18660 | 5.57044  |                                                     |
| 20 | 17511849 | 17512128 | KD2-H4K8ac_peak_18661 | 5.405    |                                                     |
| 20 | 17550347 | 17550608 | KD2-H4K8ac_peak_18662 | 6.66692  | BFSP1_ENSG00000125864;DSTN_ENSG00000125868          |
| 20 | 17550842 | 17551239 | KD2-H4K8ac_peak_18663 | 8.2413   | BFSP1_ENSG00000125864;DSTN_ENSG00000125868          |
| 20 | 17617142 | 17617346 | KD2-H4K8ac_peak_18664 | 6.25869  |                                                     |
| 20 | 17626727 | 17626926 | KD2-H4K8ac_peak_18665 | 5.3778   |                                                     |
| 20 | 17663224 | 17663453 | KD2-H4K8ac_peak_18666 | 15.19698 | RRBP1_ENSG00000125844                               |
| 20 | 17787304 | 17787836 | KD2-H4K8ac_peak_18667 | 7.22457  |                                                     |
| 20 | 17790413 | 17790611 | KD2-H4K8ac_peak_18668 | 7.12754  |                                                     |
| 20 | 17854366 | 17854585 | KD2-H4K8ac_peak_18669 | 10.53377 |                                                     |
| 20 | 17948627 | 17950055 | KD2-H4K8ac_peak_18670 | 12.08081 | SNX5_ENSG00000089006;MGME1_ENSG00000125871          |
| 20 | 17988348 | 17988747 | KD2-H4K8ac_peak_18671 | 5.54647  |                                                     |
| 20 | 18117778 | 18119134 | KD2-H4K8ac_peak_18672 | 28.93328 | PET117_ENSG00000232838;CSR2BP_ENSG00000149474       |
| 20 | 18268154 | 18268732 | KD2-H4K8ac_peak_18673 | 5.72327  | ZNF133_ENSG00000125846                              |
| 20 | 18394090 | 18394444 | KD2-H4K8ac_peak_18674 | 4.86824  |                                                     |

|    |          |          |                       |          |                                                         |
|----|----------|----------|-----------------------|----------|---------------------------------------------------------|
| 20 | 18548100 | 18548306 | KD2-H4K8ac_peak_18675 | 11.05407 | LINC00493_ENSG00000232388                               |
| 20 | 18568756 | 18569074 | KD2-H4K8ac_peak_18676 | 10.19949 | DTD1_ENSG00000125821                                    |
| 20 | 18774773 | 18774974 | KD2-H4K8ac_peak_18677 | 9.96798  | LINC00652_ENSG00000179935;RP5-1068E13.7_ENSG00000273148 |
| 20 | 19738008 | 19738660 | KD2-H4K8ac_peak_18678 | 7.76329  | AL121761.2_ENSG00000268628;RP1-122P22.2_ENSG00000233895 |
| 20 | 19956009 | 19956442 | KD2-H4K8ac_peak_18679 | 5.54647  |                                                         |
| 20 | 19997317 | 19997713 | KD2-H4K8ac_peak_18680 | 8.02571  | NAA20_ENSG00000173418                                   |
| 20 | 19998203 | 19998566 | KD2-H4K8ac_peak_18681 | 7.74292  | NAA20_ENSG00000173418                                   |
| 20 | 20032649 | 20033037 | KD2-H4K8ac_peak_18682 | 14.15075 | C20orf26_ENSG00000089101                                |
| 20 | 20175997 | 20176252 | KD2-H4K8ac_peak_18683 | 7.96322  |                                                         |
| 20 | 20184590 | 20184841 | KD2-H4K8ac_peak_18684 | 6.72021  |                                                         |
| 20 | 20213988 | 20214195 | KD2-H4K8ac_peak_18685 | 8.59579  |                                                         |
| 20 | 21081382 | 21083160 | KD2-H4K8ac_peak_18686 | 18.53838 |                                                         |
| 20 | 21086036 | 21087160 | KD2-H4K8ac_peak_18687 | 12.88108 | LINC00237_ENSG00000225127                               |
| 20 | 21272337 | 21272934 | KD2-H4K8ac_peak_18688 | 13.73635 |                                                         |
| 20 | 21284000 | 21284344 | KD2-H4K8ac_peak_18689 | 14.68449 | XRN2_ENSG00000088930                                    |
| 20 | 23330810 | 23331160 | KD2-H4K8ac_peak_18690 | 25.35008 | RP3-322G13.7_ENSG00000234832;NXT1_ENSG00000132661       |
| 20 | 23331536 | 23331728 | KD2-H4K8ac_peak_18691 | 7.49599  | RP3-322G13.7_ENSG00000234832;NXT1_ENSG00000132661       |
| 20 | 23338365 | 23338716 | KD2-H4K8ac_peak_18692 | 8.1331   | RP3-322G13.5_ENSG00000232645                            |
| 20 | 23342127 | 23342430 | KD2-H4K8ac_peak_18693 | 7.76329  | GZF1_ENSG00000125812                                    |
| 20 | 23401342 | 23402020 | KD2-H4K8ac_peak_18694 | 9.72244  | NAPB_ENSG00000125814                                    |
| 20 | 23402292 | 23402734 | KD2-H4K8ac_peak_18695 | 7.40111  | NAPB_ENSG00000125814                                    |
| 20 | 23618158 | 23618561 | KD2-H4K8ac_peak_18696 | 16.51005 | CST3_ENSG00000101439                                    |
| 20 | 24973044 | 24973300 | KD2-H4K8ac_peak_18697 | 12.93209 | APMAP_ENSG00000101474                                   |
| 20 | 24973560 | 24973909 | KD2-H4K8ac_peak_18698 | 8.52559  | APMAP_ENSG00000101474                                   |
| 20 | 24975705 | 24975913 | KD2-H4K8ac_peak_18699 | 6.03693  |                                                         |
| 20 | 25176447 | 25176713 | KD2-H4K8ac_peak_18700 | 6.76298  | ENTPD6_ENSG00000197586                                  |
| 20 | 25228909 | 25229362 | KD2-H4K8ac_peak_18701 | 15.64127 | PYGB_ENSG00000100994                                    |
| 20 | 25290280 | 25290762 | KD2-H4K8ac_peak_18702 | 7.40633  |                                                         |
| 20 | 25370459 | 25370981 | KD2-H4K8ac_peak_18703 | 13.44374 | ABHD12_ENSG00000100997                                  |
| 20 | 25512709 | 25512908 | KD2-H4K8ac_peak_18704 | 4.98072  |                                                         |
| 20 | 25564797 | 25565071 | KD2-H4K8ac_peak_18705 | 6.75638  |                                                         |
| 20 | 25565383 | 25566135 | KD2-H4K8ac_peak_18706 | 18.94636 | NINL_ENSG00000101004                                    |
| 20 | 25566346 | 25566898 | KD2-H4K8ac_peak_18707 | 8.26945  | NINL_ENSG00000101004                                    |
| 20 | 25604852 | 25605146 | KD2-H4K8ac_peak_18708 | 7.07117  | NANP_ENSG00000170191;ZNF337-AS1_ENSG00000213742         |
| 20 | 25605594 | 25605815 | KD2-H4K8ac_peak_18709 | 9.06703  | NANP_ENSG00000170191;ZNF337-AS1_ENSG00000213742         |
| 20 | 25677017 | 25677404 | KD2-H4K8ac_peak_18710 | 8.85813  | ZNF337_ENSG00000130684                                  |
| 20 | 25834883 | 25835143 | KD2-H4K8ac_peak_18711 | 11.43353 |                                                         |
| 20 | 25846338 | 25847181 | KD2-H4K8ac_peak_18712 | 9.89126  |                                                         |
| 20 | 25848491 | 25848755 | KD2-H4K8ac_peak_18713 | 4.42765  | FAM182B_ENSG00000175170                                 |
| 20 | 25967585 | 25967821 | KD2-H4K8ac_peak_18714 | 5.88845  |                                                         |
| 20 | 25990137 | 25990579 | KD2-H4K8ac_peak_18715 | 11.30637 | RP4-760C5.3_ENSG00000231081                             |
| 20 | 29518170 | 29518765 | KD2-H4K8ac_peak_18716 | 13.50024 |                                                         |
| 20 | 29518969 | 29519418 | KD2-H4K8ac_peak_18717 | 6.25869  |                                                         |
| 20 | 29611238 | 29611713 | KD2-H4K8ac_peak_18718 | 11.05467 | FRG1B_ENSG00000149531                                   |
| 20 | 29612032 | 29612468 | KD2-H4K8ac_peak_18719 | 12.93209 | FRG1B_ENSG00000149531                                   |
| 20 | 30102326 | 30102598 | KD2-H4K8ac_peak_18720 | 20.67053 | HM13_ENSG00000101294                                    |

|    |          |          |                       |          |                                                  |
|----|----------|----------|-----------------------|----------|--------------------------------------------------|
| 20 | 30157687 | 30158044 | KD2-H4K8ac_peak_18721 | 7.76329  |                                                  |
| 20 | 30158332 | 30158552 | KD2-H4K8ac_peak_18722 | 5.54647  |                                                  |
| 20 | 30160145 | 30160685 | KD2-H4K8ac_peak_18723 | 11.92978 | HM13-AS1_ENSG00000230613                         |
| 20 | 30161297 | 30161611 | KD2-H4K8ac_peak_18724 | 5.30799  | HM13-AS1_ENSG00000230613                         |
| 20 | 30175355 | 30175992 | KD2-H4K8ac_peak_18725 | 10.86378 |                                                  |
| 20 | 30182904 | 30183115 | KD2-H4K8ac_peak_18726 | 6.53915  |                                                  |
| 20 | 30191515 | 30192020 | KD2-H4K8ac_peak_18727 | 10.54874 |                                                  |
| 20 | 30196081 | 30196412 | KD2-H4K8ac_peak_18728 | 11.43863 |                                                  |
| 20 | 30200461 | 30200662 | KD2-H4K8ac_peak_18729 | 10.2519  |                                                  |
| 20 | 30200943 | 30201278 | KD2-H4K8ac_peak_18730 | 4.66652  |                                                  |
| 20 | 30225384 | 30225855 | KD2-H4K8ac_peak_18731 | 10.17341 | COX4I2_ENSG00000131055                           |
| 20 | 30226422 | 30227046 | KD2-H4K8ac_peak_18732 | 9.34989  | COX4I2_ENSG00000131055                           |
| 20 | 30310847 | 30311749 | KD2-H4K8ac_peak_18733 | 18.37277 | BCL2L1_ENSG00000171552                           |
| 20 | 30423831 | 30424199 | KD2-H4K8ac_peak_18734 | 9.09777  |                                                  |
| 20 | 30424669 | 30424878 | KD2-H4K8ac_peak_18735 | 4.0528   |                                                  |
| 20 | 30430213 | 30431094 | KD2-H4K8ac_peak_18736 | 7.13615  |                                                  |
| 20 | 30440256 | 30440853 | KD2-H4K8ac_peak_18737 | 7.48133  |                                                  |
| 20 | 30449627 | 30449951 | KD2-H4K8ac_peak_18738 | 12.37731 |                                                  |
| 20 | 30450295 | 30450567 | KD2-H4K8ac_peak_18739 | 4.7158   |                                                  |
| 20 | 30458035 | 30458950 | KD2-H4K8ac_peak_18740 | 12.14909 | DUSP15_ENSG00000149599;TTL9_ENSG00000131044      |
| 20 | 30468141 | 30468429 | KD2-H4K8ac_peak_18741 | 3.75035  |                                                  |
| 20 | 30498706 | 30499319 | KD2-H4K8ac_peak_18742 | 6.50927  |                                                  |
| 20 | 30539392 | 30539656 | KD2-H4K8ac_peak_18743 | 5.75757  | PDRG1_ENSG00000088356                            |
| 20 | 30555943 | 30556193 | KD2-H4K8ac_peak_18744 | 7.69287  | XKR7_ENSG00000260903                             |
| 20 | 30595863 | 30596064 | KD2-H4K8ac_peak_18745 | 5.88845  | RNA5SP481_ENSG00000252623                        |
| 20 | 30606172 | 30607207 | KD2-H4K8ac_peak_18746 | 6.20982  |                                                  |
| 20 | 30679634 | 30680207 | KD2-H4K8ac_peak_18747 | 9.82729  |                                                  |
| 20 | 30697008 | 30698347 | KD2-H4K8ac_peak_18748 | 10.43145 | TM9SF4_ENSG00000101337                           |
| 20 | 30777658 | 30778193 | KD2-H4K8ac_peak_18749 | 16.54162 | TSPY26P_ENSG00000235217                          |
| 20 | 30795013 | 30795507 | KD2-H4K8ac_peak_18750 | 23.33626 | POFUT1_ENSG00000101346                           |
| 20 | 30795731 | 30796129 | KD2-H4K8ac_peak_18751 | 10.96455 | POFUT1_ENSG00000101346                           |
| 20 | 30864845 | 30865836 | KD2-H4K8ac_peak_18752 | 11.80283 | KIF3B_ENSG00000101350;AL121897.1_ENSG00000264308 |
| 20 | 30946210 | 30946431 | KD2-H4K8ac_peak_18753 | 4.67342  | ASXL1_ENSG00000171456                            |
| 20 | 30946649 | 30947061 | KD2-H4K8ac_peak_18754 | 5.59859  | ASXL1_ENSG00000171456                            |
| 20 | 31033552 | 31033746 | KD2-H4K8ac_peak_18755 | 6.25869  |                                                  |
| 20 | 31034110 | 31034375 | KD2-H4K8ac_peak_18756 | 7.07117  |                                                  |
| 20 | 31036308 | 31036763 | KD2-H4K8ac_peak_18757 | 8.82006  | RP5-1184F4.5_ENSG00000236772                     |
| 20 | 31037397 | 31037625 | KD2-H4K8ac_peak_18758 | 6.35843  | RP5-1184F4.5_ENSG00000236772                     |
| 20 | 31039130 | 31039343 | KD2-H4K8ac_peak_18759 | 5.13615  |                                                  |
| 20 | 31043916 | 31044862 | KD2-H4K8ac_peak_18760 | 8.4716   |                                                  |
| 20 | 31071065 | 31071264 | KD2-H4K8ac_peak_18761 | 10.0692  |                                                  |
| 20 | 31071677 | 31072742 | KD2-H4K8ac_peak_18762 | 36.03116 |                                                  |
| 20 | 31084486 | 31084804 | KD2-H4K8ac_peak_18763 | 9.36516  |                                                  |
| 20 | 31085251 | 31085795 | KD2-H4K8ac_peak_18764 | 5.4779   |                                                  |
| 20 | 31086389 | 31086923 | KD2-H4K8ac_peak_18765 | 9.63925  |                                                  |
| 20 | 31094585 | 31094858 | KD2-H4K8ac_peak_18766 | 8.05311  |                                                  |

|    |          |          |                       |          |                                                   |
|----|----------|----------|-----------------------|----------|---------------------------------------------------|
| 20 | 31096930 | 31097123 | KD2-H4K8ac_peak_18767 | 4.211    |                                                   |
| 20 | 31104529 | 31105119 | KD2-H4K8ac_peak_18768 | 22.12955 |                                                   |
| 20 | 31105398 | 31106797 | KD2-H4K8ac_peak_18769 | 16.54162 |                                                   |
| 20 | 31109209 | 31109539 | KD2-H4K8ac_peak_18770 | 6.29509  |                                                   |
| 20 | 31110591 | 31111048 | KD2-H4K8ac_peak_18771 | 6.67092  |                                                   |
| 20 | 31111339 | 31111577 | KD2-H4K8ac_peak_18772 | 5.49497  |                                                   |
| 20 | 31114998 | 31116589 | KD2-H4K8ac_peak_18773 | 13.81781 |                                                   |
| 20 | 31123904 | 31124198 | KD2-H4K8ac_peak_18774 | 11.79585 |                                                   |
| 20 | 31169216 | 31169599 | KD2-H4K8ac_peak_18775 | 7.40111  | RP11-410N8.1_ENSG00000228156                      |
| 20 | 31170548 | 31171227 | KD2-H4K8ac_peak_18776 | 10.46264 | RP11-410N8.1_ENSG00000228156                      |
| 20 | 31171527 | 31171827 | KD2-H4K8ac_peak_18777 | 12.2973  |                                                   |
| 20 | 31195701 | 31196114 | KD2-H4K8ac_peak_18778 | 9.05418  |                                                   |
| 20 | 31214690 | 31215992 | KD2-H4K8ac_peak_18779 | 12.79505 |                                                   |
| 20 | 31226459 | 31226733 | KD2-H4K8ac_peak_18780 | 4.06758  |                                                   |
| 20 | 31252390 | 31252790 | KD2-H4K8ac_peak_18781 | 5.15777  |                                                   |
| 20 | 31260608 | 31260815 | KD2-H4K8ac_peak_18782 | 7.79898  | C20orf203_ENSG00000198547                         |
| 20 | 31268904 | 31269489 | KD2-H4K8ac_peak_18783 | 4.86324  |                                                   |
| 20 | 31273784 | 31274004 | KD2-H4K8ac_peak_18784 | 5.51783  |                                                   |
| 20 | 31330475 | 31330951 | KD2-H4K8ac_peak_18785 | 5.9696   | COMMD7_ENSG00000149600                            |
| 20 | 31349542 | 31349877 | KD2-H4K8ac_peak_18786 | 11.64359 | DNMT3B_ENSG00000088305                            |
| 20 | 31406983 | 31407357 | KD2-H4K8ac_peak_18787 | 10.86378 | MAPRE1_ENSG00000101367                            |
| 20 | 31407780 | 31408244 | KD2-H4K8ac_peak_18788 | 10.29344 | MAPRE1_ENSG00000101367                            |
| 20 | 31864473 | 31864736 | KD2-H4K8ac_peak_18789 | 6.82976  |                                                   |
| 20 | 31989091 | 31989313 | KD2-H4K8ac_peak_18790 | 9.73431  | CDK5RAP1_ENSG00000101391                          |
| 20 | 31989744 | 31990162 | KD2-H4K8ac_peak_18791 | 9.59814  | CDK5RAP1_ENSG00000101391                          |
| 20 | 32077198 | 32077558 | KD2-H4K8ac_peak_18792 | 7.47462  | CBFA2T2_ENSG00000078699                           |
| 20 | 32077975 | 32078264 | KD2-H4K8ac_peak_18793 | 8.79106  | CBFA2T2_ENSG00000078699                           |
| 20 | 32086188 | 32086808 | KD2-H4K8ac_peak_18794 | 11.60333 |                                                   |
| 20 | 32152338 | 32152579 | KD2-H4K8ac_peak_18795 | 5.45396  |                                                   |
| 20 | 32156751 | 32157033 | KD2-H4K8ac_peak_18796 | 4.59928  |                                                   |
| 20 | 32157767 | 32158088 | KD2-H4K8ac_peak_18797 | 9.11031  |                                                   |
| 20 | 32162207 | 32162602 | KD2-H4K8ac_peak_18798 | 10.0692  |                                                   |
| 20 | 32163498 | 32163944 | KD2-H4K8ac_peak_18799 | 10.05606 |                                                   |
| 20 | 32168346 | 32168581 | KD2-H4K8ac_peak_18800 | 6.91644  |                                                   |
| 20 | 32251180 | 32251439 | KD2-H4K8ac_peak_18801 | 8.52921  |                                                   |
| 20 | 32251664 | 32252220 | KD2-H4K8ac_peak_18802 | 8.10216  |                                                   |
| 20 | 32254264 | 32254457 | KD2-H4K8ac_peak_18803 | 6.45083  | ACTL10_ENSG00000182584                            |
| 20 | 32261349 | 32261637 | KD2-H4K8ac_peak_18804 | 6.48242  | NECAB3_ENSG00000125967;RP1-63M2.5_ENSG00000271803 |
| 20 | 32261941 | 32262146 | KD2-H4K8ac_peak_18805 | 4.91674  | NECAB3_ENSG00000125967;RP1-63M2.5_ENSG00000271803 |
| 20 | 32274567 | 32274827 | KD2-H4K8ac_peak_18806 | 3.95782  | E2F1_ENSG00000101412                              |
| 20 | 32281636 | 32282252 | KD2-H4K8ac_peak_18807 | 18.72657 |                                                   |
| 20 | 32283759 | 32284227 | KD2-H4K8ac_peak_18808 | 5.14125  |                                                   |
| 20 | 32284735 | 32285100 | KD2-H4K8ac_peak_18809 | 6.56926  |                                                   |
| 20 | 32291124 | 32291371 | KD2-H4K8ac_peak_18810 | 3.87414  |                                                   |
| 20 | 32307769 | 32308024 | KD2-H4K8ac_peak_18811 | 11.09936 | PXMP4_ENSG00000101417                             |
| 20 | 32308346 | 32309039 | KD2-H4K8ac_peak_18812 | 14.74047 | PXMP4_ENSG00000101417                             |

|    |          |          |                       |          |                                                                       |
|----|----------|----------|-----------------------|----------|-----------------------------------------------------------------------|
| 20 | 32319202 | 32319704 | KD2-H4K8ac_peak_18813 | 5.75757  | RP4-553F4.2_ENSG00000229188;ZNF341_ENSG00000131061                    |
| 20 | 32319927 | 32320603 | KD2-H4K8ac_peak_18814 | 17.17257 | RP4-553F4.2_ENSG00000229188;ZNF341_ENSG00000131061                    |
| 20 | 32376159 | 32376664 | KD2-H4K8ac_peak_18815 | 7.54952  |                                                                       |
| 20 | 32377131 | 32377385 | KD2-H4K8ac_peak_18816 | 10.21366 |                                                                       |
| 20 | 32399199 | 32399640 | KD2-H4K8ac_peak_18817 | 5.53033  | RP4-553F4.6_ENSG00000230753;CHMP4B_ENSG00000101421                    |
| 20 | 32426962 | 32427180 | KD2-H4K8ac_peak_18818 | 7.13615  |                                                                       |
| 20 | 32430157 | 32430520 | KD2-H4K8ac_peak_18819 | 5.14125  |                                                                       |
| 20 | 32433610 | 32433806 | KD2-H4K8ac_peak_18820 | 4.44748  |                                                                       |
| 20 | 32447701 | 32447905 | KD2-H4K8ac_peak_18821 | 4.19341  |                                                                       |
| 20 | 32450652 | 32451230 | KD2-H4K8ac_peak_18822 | 7.74292  |                                                                       |
| 20 | 32451820 | 32452220 | KD2-H4K8ac_peak_18823 | 10.30284 |                                                                       |
| 20 | 32452735 | 32454259 | KD2-H4K8ac_peak_18824 | 12.78794 |                                                                       |
| 20 | 32516093 | 32516294 | KD2-H4K8ac_peak_18825 | 3.75035  |                                                                       |
| 20 | 32581502 | 32582257 | KD2-H4K8ac_peak_18826 | 9.89383  | RP5-1125A11.1_ENSG00000228265;RALY_ENSG00000125970                    |
| 20 | 32699399 | 32699971 | KD2-H4K8ac_peak_18827 | 11.04256 | EIF2S2_ENSG00000125977                                                |
| 20 | 32700423 | 32700831 | KD2-H4K8ac_peak_18828 | 7.52168  | EIF2S2_ENSG00000125977                                                |
| 20 | 32890480 | 32890729 | KD2-H4K8ac_peak_18829 | 6.0605   |                                                                       |
| 20 | 32951208 | 32951658 | KD2-H4K8ac_peak_18830 | 7.36799  | ITCH_ENSG00000078747                                                  |
| 20 | 33103415 | 33104527 | KD2-H4K8ac_peak_18831 | 12.99417 | DYNLRB1_ENSG00000125971                                               |
| 20 | 33145883 | 33146332 | KD2-H4K8ac_peak_18832 | 12.08081 |                                                                       |
| 20 | 33146563 | 33146877 | KD2-H4K8ac_peak_18833 | 9.95119  |                                                                       |
| 20 | 33264218 | 33264446 | KD2-H4K8ac_peak_18834 | 5.54647  | PIGU_ENSG00000101464                                                  |
| 20 | 33291507 | 33292947 | KD2-H4K8ac_peak_18835 | 14.12454 | TP53INP2_ENSG00000078804                                              |
| 20 | 33297058 | 33297505 | KD2-H4K8ac_peak_18836 | 4.37809  |                                                                       |
| 20 | 33412574 | 33413865 | KD2-H4K8ac_peak_18837 | 12.08081 | NCOA6_ENSG00000198646                                                 |
| 20 | 33543139 | 33544481 | KD2-H4K8ac_peak_18838 | 13.73635 | GSS_ENSG00000100983                                                   |
| 20 | 33568386 | 33568727 | KD2-H4K8ac_peak_18839 | 8.6308   |                                                                       |
| 20 | 33680164 | 33680576 | KD2-H4K8ac_peak_18840 | 6.60096  | TRPC4AP_ENSG00000100991                                               |
| 20 | 33734425 | 33735056 | KD2-H4K8ac_peak_18841 | 7.76104  |                                                                       |
| 20 | 33754141 | 33754584 | KD2-H4K8ac_peak_18842 | 6.66692  |                                                                       |
| 20 | 33754780 | 33755362 | KD2-H4K8ac_peak_18843 | 9.15329  |                                                                       |
| 20 | 33864948 | 33865504 | KD2-H4K8ac_peak_18844 | 7.44324  | EDEM2_ENSG00000088298;MMP24-AS1_ENSG00000126005                       |
| 20 | 33872082 | 33872370 | KD2-H4K8ac_peak_18845 | 9.95119  | EIF6_ENSG00000242372;FAM83C-AS1_ENSG00000235214                       |
| 20 | 33872691 | 33873489 | KD2-H4K8ac_peak_18846 | 7.49599  | EIF6_ENSG00000242372;FAM83C-AS1_ENSG00000235214                       |
| 20 | 33883845 | 33884211 | KD2-H4K8ac_peak_18847 | 4.68932  |                                                                       |
| 20 | 33999267 | 33999732 | KD2-H4K8ac_peak_18848 | 8.58069  | UQCC1_ENSG00000101019                                                 |
| 20 | 34000011 | 34000352 | KD2-H4K8ac_peak_18849 | 13.50024 | UQCC1_ENSG00000101019                                                 |
| 20 | 34026932 | 34027240 | KD2-H4K8ac_peak_18850 | 6.64891  |                                                                       |
| 20 | 34041930 | 34042425 | KD2-H4K8ac_peak_18851 | 6.56211  | GDF5_ENSG00000125965;MIR1289-1_ENSG00000221763;CEP250_ENSG00000126001 |
| 20 | 34043015 | 34043308 | KD2-H4K8ac_peak_18852 | 5.75757  | GDF5_ENSG00000125965;CEP250_ENSG00000126001                           |
| 20 | 34129877 | 34130422 | KD2-H4K8ac_peak_18853 | 14.68449 | ERGIC3_ENSG00000125991                                                |
| 20 | 34189031 | 34189448 | KD2-H4K8ac_peak_18854 | 5.57044  |                                                                       |
| 20 | 34203772 | 34204011 | KD2-H4K8ac_peak_18855 | 4.30033  | SPAG4_ENSG00000061656                                                 |
| 20 | 34252346 | 34252811 | KD2-H4K8ac_peak_18856 | 20.0792  | CPNE1_ENSG00000214078;RBM12_ENSG00000244462                           |
| 20 | 34253665 | 34253963 | KD2-H4K8ac_peak_18857 | 4.42765  | CPNE1_ENSG00000214078;RBM12_ENSG00000244462                           |
| 20 | 34286859 | 34287233 | KD2-H4K8ac_peak_18858 | 10.65724 | NFS1_ENSG00000244005;ROMO1_ENSG00000125995                            |

|    |          |          |                       |          |                                                                                  |
|----|----------|----------|-----------------------|----------|----------------------------------------------------------------------------------|
| 20 | 34329676 | 34330107 | KD2-H4K8ac_peak_18859 | 8.36432  | RBM39_ENSG00000131051                                                            |
| 20 | 34359518 | 34359748 | KD2-H4K8ac_peak_18860 | 11.05467 | PHF20_ENSG00000025293                                                            |
| 20 | 34541860 | 34542175 | KD2-H4K8ac_peak_18861 | 10.46874 |                                                                                  |
| 20 | 34579603 | 34579914 | KD2-H4K8ac_peak_18862 | 7.91974  |                                                                                  |
| 20 | 34638389 | 34638833 | KD2-H4K8ac_peak_18863 | 10.20046 | LINC00657_ENSG00000260032                                                        |
| 20 | 34639077 | 34639629 | KD2-H4K8ac_peak_18864 | 16.09057 | LINC00657_ENSG00000260032                                                        |
| 20 | 34652287 | 34652615 | KD2-H4K8ac_peak_18865 | 18.29344 |                                                                                  |
| 20 | 34680118 | 34680428 | KD2-H4K8ac_peak_18866 | 11.05407 | EPB41L1_ENSG00000088367                                                          |
| 20 | 34681192 | 34681581 | KD2-H4K8ac_peak_18867 | 6.40683  |                                                                                  |
| 20 | 34742039 | 34742327 | KD2-H4K8ac_peak_18868 | 8.85813  |                                                                                  |
| 20 | 34742705 | 34742928 | KD2-H4K8ac_peak_18869 | 5.9696   | RP11-234K24.3_ENSG00000232406                                                    |
| 20 | 34823950 | 34824183 | KD2-H4K8ac_peak_18870 | 4.30033  | AAR2_ENSG00000131043                                                             |
| 20 | 34824453 | 34824717 | KD2-H4K8ac_peak_18871 | 6.66692  | AAR2_ENSG00000131043                                                             |
| 20 | 34861937 | 34862414 | KD2-H4K8ac_peak_18872 | 3.83717  |                                                                                  |
| 20 | 34863622 | 34863871 | KD2-H4K8ac_peak_18873 | 6.40297  |                                                                                  |
| 20 | 34894274 | 34894935 | KD2-H4K8ac_peak_18874 | 6.25869  | DLGAP4_ENSG00000080845                                                           |
| 20 | 35064368 | 35064674 | KD2-H4K8ac_peak_18875 | 5.82799  |                                                                                  |
| 20 | 35088962 | 35089509 | KD2-H4K8ac_peak_18876 | 19.55721 |                                                                                  |
| 20 | 35090261 | 35090951 | KD2-H4K8ac_peak_18877 | 13.2669  |                                                                                  |
| 20 | 35200971 | 35201772 | KD2-H4K8ac_peak_18878 | 13.49029 | RP5-977B1.7_ENSG00000232907;TGIF2_ENSG00000118707                                |
| 20 | 35202059 | 35202779 | KD2-H4K8ac_peak_18879 | 6.40297  | RP5-977B1.7_ENSG00000232907;TGIF2_ENSG00000118707;TGIF2-C20orf24_ENSG00000259399 |
| 20 | 35203005 | 35203304 | KD2-H4K8ac_peak_18880 | 10.96455 | TGIF2-C20orf24_ENSG00000259399                                                   |
| 20 | 35233575 | 35233884 | KD2-H4K8ac_peak_18881 | 8.55271  | RP5-977B1.11_ENSG00000259716;C20orf24_ENSG00000101084                            |
| 20 | 35234189 | 35234606 | KD2-H4K8ac_peak_18882 | 13.73635 | C20orf24_ENSG00000101084                                                         |
| 20 | 35401724 | 35402161 | KD2-H4K8ac_peak_18883 | 10.65724 | DSN1_ENSG00000149636                                                             |
| 20 | 35402398 | 35402648 | KD2-H4K8ac_peak_18884 | 9.36516  | DSN1_ENSG00000149636                                                             |
| 20 | 35402856 | 35403175 | KD2-H4K8ac_peak_18885 | 10.65724 | DSN1_ENSG00000149636                                                             |
| 20 | 35463598 | 35464062 | KD2-H4K8ac_peak_18886 | 12.84642 |                                                                                  |
| 20 | 35491415 | 35491948 | KD2-H4K8ac_peak_18887 | 11.02863 | SOGA1_ENSG00000149639                                                            |
| 20 | 35492258 | 35492908 | KD2-H4K8ac_peak_18888 | 9.65086  | SOGA1_ENSG00000149639                                                            |
| 20 | 35515185 | 35515609 | KD2-H4K8ac_peak_18889 | 10.87093 |                                                                                  |
| 20 | 35580481 | 35580947 | KD2-H4K8ac_peak_18890 | 7.45501  | SAMHD1_ENSG00000101347                                                           |
| 20 | 35723606 | 35723895 | KD2-H4K8ac_peak_18891 | 7.40111  | RBL1_ENSG00000080839;RBL1_ENSG00000269846                                        |
| 20 | 35724124 | 35725203 | KD2-H4K8ac_peak_18892 | 12.82393 | RBL1_ENSG00000080839;RBL1_ENSG00000269846                                        |
| 20 | 35806467 | 35806689 | KD2-H4K8ac_peak_18893 | 6.30229  | RPN2_ENSG00000118705                                                             |
| 20 | 35806984 | 35807246 | KD2-H4K8ac_peak_18894 | 9.36516  | MROH8_ENSG00000101353;RPN2_ENSG00000118705                                       |
| 20 | 35807515 | 35808096 | KD2-H4K8ac_peak_18895 | 13.73635 | MROH8_ENSG00000101353;RPN2_ENSG00000118705                                       |
| 20 | 35831346 | 35831547 | KD2-H4K8ac_peak_18896 | 5.15777  |                                                                                  |
| 20 | 35849158 | 35849436 | KD2-H4K8ac_peak_18897 | 5.77029  |                                                                                  |
| 20 | 35849659 | 35849885 | KD2-H4K8ac_peak_18898 | 10.0692  |                                                                                  |
| 20 | 35860290 | 35860814 | KD2-H4K8ac_peak_18899 | 5.9696   |                                                                                  |
| 20 | 35863122 | 35863467 | KD2-H4K8ac_peak_18900 | 13.80019 |                                                                                  |
| 20 | 35863864 | 35864332 | KD2-H4K8ac_peak_18901 | 15.48665 |                                                                                  |
| 20 | 35865819 | 35867112 | KD2-H4K8ac_peak_18902 | 12.99417 |                                                                                  |
| 20 | 35867962 | 35868402 | KD2-H4K8ac_peak_18903 | 5.14125  |                                                                                  |
| 20 | 35869026 | 35869231 | KD2-H4K8ac_peak_18904 | 7.27716  |                                                                                  |

|    |          |          |                       |          |                        |
|----|----------|----------|-----------------------|----------|------------------------|
| 20 | 35870370 | 35870646 | KD2-H4K8ac_peak_18905 | 7.9076   |                        |
| 20 | 35871841 | 35872478 | KD2-H4K8ac_peak_18906 | 14.49045 |                        |
| 20 | 35872902 | 35873337 | KD2-H4K8ac_peak_18907 | 9.55735  |                        |
| 20 | 35879920 | 35880231 | KD2-H4K8ac_peak_18908 | 4.42765  |                        |
| 20 | 35887783 | 35888122 | KD2-H4K8ac_peak_18909 | 10.08707 |                        |
| 20 | 35896522 | 35896855 | KD2-H4K8ac_peak_18910 | 7.76329  |                        |
| 20 | 35905041 | 35905797 | KD2-H4K8ac_peak_18911 | 8.17557  |                        |
| 20 | 35917555 | 35917912 | KD2-H4K8ac_peak_18912 | 13.83528 | MANBAL_ENSG00000101363 |
| 20 | 35918127 | 35918445 | KD2-H4K8ac_peak_18913 | 11.04256 | MANBAL_ENSG00000101363 |
| 20 | 35931339 | 35931622 | KD2-H4K8ac_peak_18914 | 5.02756  |                        |
| 20 | 35940251 | 35940473 | KD2-H4K8ac_peak_18915 | 7.75971  |                        |
| 20 | 35942026 | 35942955 | KD2-H4K8ac_peak_18916 | 12.79505 |                        |
| 20 | 35943760 | 35945472 | KD2-H4K8ac_peak_18917 | 15.40367 |                        |
| 20 | 35946516 | 35947688 | KD2-H4K8ac_peak_18918 | 12.84642 |                        |
| 20 | 35954325 | 35955139 | KD2-H4K8ac_peak_18919 | 12.5605  |                        |
| 20 | 35956872 | 35957626 | KD2-H4K8ac_peak_18920 | 5.9696   |                        |
| 20 | 35958735 | 35959012 | KD2-H4K8ac_peak_18921 | 6.24114  |                        |
| 20 | 35959509 | 35960557 | KD2-H4K8ac_peak_18922 | 14.8083  |                        |
| 20 | 35960841 | 35962594 | KD2-H4K8ac_peak_18923 | 24.80313 |                        |
| 20 | 35964191 | 35964882 | KD2-H4K8ac_peak_18924 | 11.24702 |                        |
| 20 | 35965251 | 35965522 | KD2-H4K8ac_peak_18925 | 11.89502 |                        |
| 20 | 35965859 | 35966064 | KD2-H4K8ac_peak_18926 | 6.0073   |                        |
| 20 | 35968883 | 35969353 | KD2-H4K8ac_peak_18927 | 11.9948  |                        |
| 20 | 35969914 | 35970234 | KD2-H4K8ac_peak_18928 | 5.32933  |                        |
| 20 | 35972966 | 35973208 | KD2-H4K8ac_peak_18929 | 4.95872  | SRC_ENSG00000197122    |
| 20 | 35973567 | 35974077 | KD2-H4K8ac_peak_18930 | 10.87093 | SRC_ENSG00000197122    |
| 20 | 35974287 | 35974677 | KD2-H4K8ac_peak_18931 | 8.4716   |                        |
| 20 | 35974940 | 35975342 | KD2-H4K8ac_peak_18932 | 13.12288 |                        |
| 20 | 36007613 | 36007868 | KD2-H4K8ac_peak_18933 | 7.167    |                        |
| 20 | 36013288 | 36013729 | KD2-H4K8ac_peak_18934 | 5.54647  |                        |
| 20 | 36014206 | 36014713 | KD2-H4K8ac_peak_18935 | 5.57044  |                        |
| 20 | 36015160 | 36015589 | KD2-H4K8ac_peak_18936 | 7.27716  |                        |
| 20 | 36020778 | 36021125 | KD2-H4K8ac_peak_18937 | 5.30799  |                        |
| 20 | 36021450 | 36021779 | KD2-H4K8ac_peak_18938 | 4.68806  |                        |
| 20 | 36022252 | 36022584 | KD2-H4K8ac_peak_18939 | 6.28103  |                        |
| 20 | 36023368 | 36024597 | KD2-H4K8ac_peak_18940 | 21.38135 |                        |
| 20 | 36024937 | 36027253 | KD2-H4K8ac_peak_18941 | 14.74638 |                        |
| 20 | 36034650 | 36035069 | KD2-H4K8ac_peak_18942 | 15.05364 |                        |
| 20 | 36035768 | 36036854 | KD2-H4K8ac_peak_18943 | 7.36799  |                        |
| 20 | 36038033 | 36038298 | KD2-H4K8ac_peak_18944 | 15.039   |                        |
| 20 | 36051333 | 36051575 | KD2-H4K8ac_peak_18945 | 4.42765  |                        |
| 20 | 36145973 | 36146242 | KD2-H4K8ac_peak_18946 | 5.18447  |                        |
| 20 | 36147364 | 36147655 | KD2-H4K8ac_peak_18947 | 4.23819  |                        |
| 20 | 36156685 | 36156926 | KD2-H4K8ac_peak_18948 | 6.67092  | BLCAP_ENSG00000166619  |
| 20 | 36162474 | 36162899 | KD2-H4K8ac_peak_18949 | 8.79106  |                        |
| 20 | 36192567 | 36192895 | KD2-H4K8ac_peak_18950 | 7.40111  |                        |



|    |          |          |                       |          |                                                 |
|----|----------|----------|-----------------------|----------|-------------------------------------------------|
| 20 | 36226476 | 36226723 | KD2-H4K8ac_peak_18951 | 4.84794  |                                                 |
| 20 | 36340192 | 36340505 | KD2-H4K8ac_peak_18952 | 5.14125  |                                                 |
| 20 | 36531496 | 36531897 | KD2-H4K8ac_peak_18953 | 12.84642 | VSTM2L_ENSG00000132821                          |
| 20 | 36539877 | 36540202 | KD2-H4K8ac_peak_18954 | 6.60096  |                                                 |
| 20 | 36540754 | 36541103 | KD2-H4K8ac_peak_18955 | 7.74292  |                                                 |
| 20 | 36543547 | 36543816 | KD2-H4K8ac_peak_18956 | 8.2413   |                                                 |
| 20 | 36544420 | 36544982 | KD2-H4K8ac_peak_18957 | 6.25869  |                                                 |
| 20 | 36616539 | 36616783 | KD2-H4K8ac_peak_18958 | 5.5051   |                                                 |
| 20 | 36661307 | 36661627 | KD2-H4K8ac_peak_18959 | 10.46264 | TTII_ENSG00000101407;RPRD1B_ENSG00000101413     |
| 20 | 36661922 | 36662364 | KD2-H4K8ac_peak_18960 | 12.96152 | TTII_ENSG00000101407;RPRD1B_ENSG00000101413     |
| 20 | 36695630 | 36695932 | KD2-H4K8ac_peak_18961 | 8.30094  |                                                 |
| 20 | 36723694 | 36723893 | KD2-H4K8ac_peak_18962 | 7.70289  |                                                 |
| 20 | 36737852 | 36738158 | KD2-H4K8ac_peak_18963 | 15.13261 |                                                 |
| 20 | 36739355 | 36739582 | KD2-H4K8ac_peak_18964 | 4.54006  |                                                 |
| 20 | 36739869 | 36740119 | KD2-H4K8ac_peak_18965 | 7.70289  |                                                 |
| 20 | 36751560 | 36751789 | KD2-H4K8ac_peak_18966 | 9.16531  |                                                 |
| 20 | 36755305 | 36755574 | KD2-H4K8ac_peak_18967 | 4.211    |                                                 |
| 20 | 36767948 | 36768290 | KD2-H4K8ac_peak_18968 | 10.74057 |                                                 |
| 20 | 36768739 | 36768946 | KD2-H4K8ac_peak_18969 | 6.42097  |                                                 |
| 20 | 36779878 | 36780441 | KD2-H4K8ac_peak_18970 | 10.21366 |                                                 |
| 20 | 36781215 | 36781914 | KD2-H4K8ac_peak_18971 | 13.51732 |                                                 |
| 20 | 36793228 | 36793771 | KD2-H4K8ac_peak_18972 | 9.31907  |                                                 |
| 20 | 36888808 | 36889048 | KD2-H4K8ac_peak_18973 | 9.63487  | KIAA1755_ENSG00000149633;BPI_ENSG00000101425    |
| 20 | 37063573 | 37063943 | KD2-H4K8ac_peak_18974 | 10.66719 | SNHG17_ENSG00000196756;SNORA71D_ENSG00000200354 |
| 20 | 37074859 | 37075066 | KD2-H4K8ac_peak_18975 | 4.70206  | SNHG11_ENSG00000174365                          |
| 20 | 37075349 | 37075857 | KD2-H4K8ac_peak_18976 | 13.12288 | SNHG11_ENSG00000174365                          |
| 20 | 37101522 | 37101798 | KD2-H4K8ac_peak_18977 | 13.95627 | RALGAPB_ENSG00000170471                         |
| 20 | 37302508 | 37302988 | KD2-H4K8ac_peak_18978 | 6.65673  |                                                 |
| 20 | 37303277 | 37303778 | KD2-H4K8ac_peak_18979 | 10.86378 |                                                 |
| 20 | 37360080 | 37360299 | KD2-H4K8ac_peak_18980 | 10.96455 |                                                 |
| 20 | 37377150 | 37377357 | KD2-H4K8ac_peak_18981 | 10.43145 | ACTR5_ENSG00000101442                           |
| 20 | 37434920 | 37435113 | KD2-H4K8ac_peak_18982 | 3.87414  | PPP1R16B_ENSG00000101445                        |
| 20 | 37435727 | 37436038 | KD2-H4K8ac_peak_18983 | 7.27716  |                                                 |
| 20 | 37485001 | 37485216 | KD2-H4K8ac_peak_18984 | 6.9809   |                                                 |
| 20 | 37490669 | 37490891 | KD2-H4K8ac_peak_18985 | 7.47462  |                                                 |
| 20 | 37493173 | 37494158 | KD2-H4K8ac_peak_18986 | 7.51054  |                                                 |
| 20 | 37494384 | 37495349 | KD2-H4K8ac_peak_18987 | 17.8868  |                                                 |
| 20 | 37495789 | 37496129 | KD2-H4K8ac_peak_18988 | 10.58016 |                                                 |
| 20 | 37499375 | 37500072 | KD2-H4K8ac_peak_18989 | 6.25869  |                                                 |
| 20 | 37501846 | 37503444 | KD2-H4K8ac_peak_18990 | 13.56049 | RN7SL116P_ENSG00000240474                       |
| 20 | 37504326 | 37504847 | KD2-H4K8ac_peak_18991 | 10.38558 |                                                 |
| 20 | 37505825 | 37506222 | KD2-H4K8ac_peak_18992 | 9.58924  |                                                 |
| 20 | 37507572 | 37507853 | KD2-H4K8ac_peak_18993 | 6.25869  |                                                 |
| 20 | 37509730 | 37510275 | KD2-H4K8ac_peak_18994 | 13.43171 |                                                 |
| 20 | 37511555 | 37511886 | KD2-H4K8ac_peak_18995 | 12.93209 |                                                 |
| 20 | 37512371 | 37512867 | KD2-H4K8ac_peak_18996 | 7.93362  |                                                 |

|    |          |          |                       |          |                                                   |
|----|----------|----------|-----------------------|----------|---------------------------------------------------|
| 20 | 37513878 | 37514117 | KD2-H4K8ac_peak_18997 | 4.89359  |                                                   |
| 20 | 37518255 | 37518635 | KD2-H4K8ac_peak_18998 | 8.26945  |                                                   |
| 20 | 37522896 | 37523152 | KD2-H4K8ac_peak_18999 | 7.07512  |                                                   |
| 20 | 37590321 | 37590680 | KD2-H4K8ac_peak_19000 | 4.0528   | RP4-616B8.4_ENSG00000261431;DHX35_ENSG00000101452 |
| 20 | 37591013 | 37591434 | KD2-H4K8ac_peak_19001 | 21.11201 | RP4-616B8.4_ENSG00000261431;DHX35_ENSG00000101452 |
| 20 | 37678676 | 37679456 | KD2-H4K8ac_peak_19002 | 8.52559  |                                                   |
| 20 | 38589669 | 38589946 | KD2-H4K8ac_peak_19003 | 4.89656  |                                                   |
| 20 | 38907489 | 38907700 | KD2-H4K8ac_peak_19004 | 5.57044  |                                                   |
| 20 | 38915504 | 38915985 | KD2-H4K8ac_peak_19005 | 9.15329  |                                                   |
| 20 | 39317258 | 39317740 | KD2-H4K8ac_peak_19006 | 12.06346 | MAFB_ENSG00000204103                              |
| 20 | 39318109 | 39318755 | KD2-H4K8ac_peak_19007 | 11.89502 | MAFB_ENSG00000204103                              |
| 20 | 39525463 | 39525726 | KD2-H4K8ac_peak_19008 | 6.72021  |                                                   |
| 20 | 39531897 | 39532198 | KD2-H4K8ac_peak_19009 | 6.14257  |                                                   |
| 20 | 39597732 | 39598055 | KD2-H4K8ac_peak_19010 | 5.25071  |                                                   |
| 20 | 39658254 | 39658454 | KD2-H4K8ac_peak_19011 | 6.24114  | TOP1_ENSG00000198900                              |
| 20 | 39765140 | 39765432 | KD2-H4K8ac_peak_19012 | 5.08628  | PLCG1_ENSG00000124181                             |
| 20 | 39765645 | 39765988 | KD2-H4K8ac_peak_19013 | 22.66567 | RP1-1J6.2_ENSG00000226648;PLCG1_ENSG00000124181   |
| 20 | 39766190 | 39766886 | KD2-H4K8ac_peak_19014 | 12.93209 | RP1-1J6.2_ENSG00000226648;PLCG1_ENSG00000124181   |
| 20 | 39945515 | 39946201 | KD2-H4K8ac_peak_19015 | 11.92978 | ZHX3_ENSG00000174306                              |
| 20 | 39946562 | 39946807 | KD2-H4K8ac_peak_19016 | 9.36516  | ZHX3_ENSG00000174306                              |
| 20 | 40015733 | 40015931 | KD2-H4K8ac_peak_19017 | 9.11031  |                                                   |
| 20 | 40016165 | 40016430 | KD2-H4K8ac_peak_19018 | 4.211    |                                                   |
| 20 | 40246659 | 40246918 | KD2-H4K8ac_peak_19019 | 12.42761 | CHD6_ENSG00000124177                              |
| 20 | 40247468 | 40247774 | KD2-H4K8ac_peak_19020 | 13.73635 | CHD6_ENSG00000124177                              |
| 20 | 40321059 | 40322106 | KD2-H4K8ac_peak_19021 | 7.76329  |                                                   |
| 20 | 42018851 | 42019085 | KD2-H4K8ac_peak_19022 | 6.07178  |                                                   |
| 20 | 42073960 | 42074165 | KD2-H4K8ac_peak_19023 | 7.45501  |                                                   |
| 20 | 42074851 | 42075217 | KD2-H4K8ac_peak_19024 | 14.48084 |                                                   |
| 20 | 42075518 | 42075947 | KD2-H4K8ac_peak_19025 | 7.40111  |                                                   |
| 20 | 42077250 | 42077457 | KD2-H4K8ac_peak_19026 | 4.42765  |                                                   |
| 20 | 42086582 | 42087338 | KD2-H4K8ac_peak_19027 | 23.72814 | SRSF6_ENSG00000124193                             |
| 20 | 42135895 | 42136668 | KD2-H4K8ac_peak_19028 | 13.88933 | L3MBTL1_ENSG00000185513                           |
| 20 | 42218821 | 42219041 | KD2-H4K8ac_peak_19029 | 6.65673  | IFT52_ENSG00000101052                             |
| 20 | 42219632 | 42219936 | KD2-H4K8ac_peak_19030 | 12.00273 | IFT52_ENSG00000101052                             |
| 20 | 42285714 | 42286109 | KD2-H4K8ac_peak_19031 | 6.40874  |                                                   |
| 20 | 42286339 | 42286598 | KD2-H4K8ac_peak_19032 | 7.07117  |                                                   |
| 20 | 42295803 | 42296167 | KD2-H4K8ac_peak_19033 | 6.56211  | MYBL2_ENSG00000101057                             |
| 20 | 42375405 | 42375653 | KD2-H4K8ac_peak_19034 | 6.2781   |                                                   |
| 20 | 42542969 | 42543348 | KD2-H4K8ac_peak_19035 | 14.66631 | TOX2_ENSG00000124191                              |
| 20 | 42544692 | 42545118 | KD2-H4K8ac_peak_19036 | 7.74292  |                                                   |
| 20 | 42554006 | 42554341 | KD2-H4K8ac_peak_19037 | 6.44277  |                                                   |
| 20 | 42587839 | 42588079 | KD2-H4K8ac_peak_19038 | 5.4497   |                                                   |
| 20 | 42591029 | 42591314 | KD2-H4K8ac_peak_19039 | 12.77963 |                                                   |
| 20 | 42637613 | 42637907 | KD2-H4K8ac_peak_19040 | 5.57044  |                                                   |
| 20 | 42638304 | 42638604 | KD2-H4K8ac_peak_19041 | 6.40297  |                                                   |
| 20 | 42639168 | 42640003 | KD2-H4K8ac_peak_19042 | 14.8083  |                                                   |

|    |          |          |                       |          |                                                      |
|----|----------|----------|-----------------------|----------|------------------------------------------------------|
| 20 | 42640817 | 42641200 | KD2-H4K8ac_peak_19043 | 7.47462  |                                                      |
| 20 | 42642896 | 42643390 | KD2-H4K8ac_peak_19044 | 9.16531  |                                                      |
| 20 | 42644538 | 42646718 | KD2-H4K8ac_peak_19045 | 14.69247 |                                                      |
| 20 | 42647160 | 42647558 | KD2-H4K8ac_peak_19046 | 9.05418  |                                                      |
| 20 | 42647924 | 42648363 | KD2-H4K8ac_peak_19047 | 12.74183 |                                                      |
| 20 | 42649165 | 42649460 | KD2-H4K8ac_peak_19048 | 7.76329  |                                                      |
| 20 | 42649713 | 42650055 | KD2-H4K8ac_peak_19049 | 5.14125  |                                                      |
| 20 | 42651188 | 42651503 | KD2-H4K8ac_peak_19050 | 12.3187  |                                                      |
| 20 | 42655334 | 42655604 | KD2-H4K8ac_peak_19051 | 9.1707   |                                                      |
| 20 | 42656004 | 42656260 | KD2-H4K8ac_peak_19052 | 5.54647  |                                                      |
| 20 | 42661089 | 42661452 | KD2-H4K8ac_peak_19053 | 12.16946 |                                                      |
| 20 | 42667803 | 42668096 | KD2-H4K8ac_peak_19054 | 9.36516  |                                                      |
| 20 | 42703647 | 42703924 | KD2-H4K8ac_peak_19055 | 11.02863 |                                                      |
| 20 | 42704306 | 42704751 | KD2-H4K8ac_peak_19056 | 9.1707   |                                                      |
| 20 | 42710158 | 42710525 | KD2-H4K8ac_peak_19057 | 9.40857  |                                                      |
| 20 | 42839033 | 42839332 | KD2-H4K8ac_peak_19058 | 4.54006  | OSER1_ENSG00000132823;OSER1-AS1_ENSG00000223891      |
| 20 | 42875902 | 42876261 | KD2-H4K8ac_peak_19059 | 11.89502 | GDAP1L1_ENSG00000124194                              |
| 20 | 42924679 | 42924930 | KD2-H4K8ac_peak_19060 | 4.65111  |                                                      |
| 20 | 42939436 | 42939796 | KD2-H4K8ac_peak_19061 | 10.7186  | FITM2_ENSG00000197296                                |
| 20 | 42940063 | 42940415 | KD2-H4K8ac_peak_19062 | 5.1707   | FITM2_ENSG00000197296                                |
| 20 | 42964705 | 42965061 | KD2-H4K8ac_peak_19063 | 4.42765  | R3HDML_ENSG00000101074                               |
| 20 | 43031185 | 43031460 | KD2-H4K8ac_peak_19064 | 7.76329  |                                                      |
| 20 | 43104023 | 43105274 | KD2-H4K8ac_peak_19065 | 13.73635 | TTPAL_ENSG00000124120                                |
| 20 | 43159954 | 43160384 | KD2-H4K8ac_peak_19066 | 10.73134 | PKIG_ENSG00000168734                                 |
| 20 | 43270627 | 43271202 | KD2-H4K8ac_peak_19067 | 5.88845  |                                                      |
| 20 | 43271493 | 43271719 | KD2-H4K8ac_peak_19068 | 9.402    |                                                      |
| 20 | 43280022 | 43280771 | KD2-H4K8ac_peak_19069 | 15.25814 | ADA_ENSG00000196839                                  |
| 20 | 43367638 | 43368352 | KD2-H4K8ac_peak_19070 | 8.55271  |                                                      |
| 20 | 43374310 | 43375014 | KD2-H4K8ac_peak_19071 | 11.79585 | RP11-445H22.4_ENSG00000244558;KCNK15_ENSG00000124249 |
| 20 | 43388668 | 43388886 | KD2-H4K8ac_peak_19072 | 7.76329  |                                                      |
| 20 | 43389914 | 43390311 | KD2-H4K8ac_peak_19073 | 3.97079  |                                                      |
| 20 | 43390768 | 43391055 | KD2-H4K8ac_peak_19074 | 8.16906  |                                                      |
| 20 | 43392018 | 43392245 | KD2-H4K8ac_peak_19075 | 6.11333  |                                                      |
| 20 | 43438194 | 43438459 | KD2-H4K8ac_peak_19076 | 4.54006  | RIMS4_ENSG00000101098                                |
| 20 | 43438666 | 43438947 | KD2-H4K8ac_peak_19077 | 6.30229  | RIMS4_ENSG00000101098                                |
| 20 | 43439252 | 43439671 | KD2-H4K8ac_peak_19078 | 7.49599  | RIMS4_ENSG00000101098                                |
| 20 | 43496058 | 43496314 | KD2-H4K8ac_peak_19079 | 9.15329  |                                                      |
| 20 | 43514462 | 43514682 | KD2-H4K8ac_peak_19080 | 10.66719 | YWHAB_ENSG00000166913                                |
| 20 | 43538774 | 43539132 | KD2-H4K8ac_peak_19081 | 13.34404 | PABPC1L_ENSG00000101104                              |
| 20 | 43539425 | 43539650 | KD2-H4K8ac_peak_19082 | 7.12754  | PABPC1L_ENSG00000101104                              |
| 20 | 43588730 | 43588991 | KD2-H4K8ac_peak_19083 | 11.03331 | TOMM34_ENSG0000025772                                |
| 20 | 43594564 | 43595000 | KD2-H4K8ac_peak_19084 | 7.1181   | STK4-AS1_ENSG00000227477;STK4_ENSG00000101109        |
| 20 | 43595199 | 43595508 | KD2-H4K8ac_peak_19085 | 8.16906  | STK4-AS1_ENSG00000227477;STK4_ENSG00000101109        |
| 20 | 43921855 | 43922499 | KD2-H4K8ac_peak_19086 | 9.68068  |                                                      |
| 20 | 43970940 | 43971140 | KD2-H4K8ac_peak_19087 | 8.10216  |                                                      |
| 20 | 43976602 | 43976983 | KD2-H4K8ac_peak_19088 | 13.1684  | SDC4_ENSG00000124145                                 |

|    |          |          |                       |          |                                                        |
|----|----------|----------|-----------------------|----------|--------------------------------------------------------|
| 20 | 43991081 | 43991392 | KD2-H4K8ac_peak_19089 | 12.0857  | SYS1_ENSG00000204070;SYS1-DBNDD2_ENSG00000254806       |
| 20 | 44034640 | 44036017 | KD2-H4K8ac_peak_19090 | 8.86099  | TP53TG5_ENSG00000124251;DBNDD2_ENSG00000244274         |
| 20 | 44044137 | 44044599 | KD2-H4K8ac_peak_19091 | 6.31143  | PIGT_ENSG00000124155                                   |
| 20 | 44044805 | 44045196 | KD2-H4K8ac_peak_19092 | 9.73431  | PIGT_ENSG00000124155                                   |
| 20 | 44099262 | 44099717 | KD2-H4K8ac_peak_19093 | 4.06758  | WFDC2_ENSG00000101443                                  |
| 20 | 44400048 | 44400683 | KD2-H4K8ac_peak_19094 | 15.5861  |                                                        |
| 20 | 44420022 | 44420445 | KD2-H4K8ac_peak_19095 | 7.47462  | WFDC3_ENSG00000124116;DNTTIP1_ENSG00000101457          |
| 20 | 44441326 | 44441817 | KD2-H4K8ac_peak_19096 | 6.52179  | UBE2C_ENSG00000175063                                  |
| 20 | 44462067 | 44462318 | KD2-H4K8ac_peak_19097 | 5.75757  | TNNC2_ENSG00000101470;SNX21_ENSG00000124104            |
| 20 | 44462785 | 44463239 | KD2-H4K8ac_peak_19098 | 7.95563  | TNNC2_ENSG00000101470;SNX21_ENSG00000124104            |
| 20 | 44485738 | 44485952 | KD2-H4K8ac_peak_19099 | 8.55271  | ACOT8_ENSG00000101473;ZSWIM3_ENSG00000132801           |
| 20 | 44486313 | 44486830 | KD2-H4K8ac_peak_19100 | 13.9234  | ACOT8_ENSG00000101473;ZSWIM3_ENSG00000132801           |
| 20 | 44508970 | 44509557 | KD2-H4K8ac_peak_19101 | 6.36319  | ZSWIM1_ENSG00000168612                                 |
| 20 | 44518925 | 44520190 | KD2-H4K8ac_peak_19102 | 20.96279 | NEURL2_ENSG00000124257;CTSA_ENSG00000064601            |
| 20 | 44540859 | 44541434 | KD2-H4K8ac_peak_19103 | 8.09472  | PLTP_ENSG00000100979                                   |
| 20 | 44563088 | 44563713 | KD2-H4K8ac_peak_19104 | 16.57619 | PCIF1_ENSG00000100982                                  |
| 20 | 44599848 | 44601050 | KD2-H4K8ac_peak_19105 | 19.43192 | ZNF335_ENSG00000198026                                 |
| 20 | 44601537 | 44601749 | KD2-H4K8ac_peak_19106 | 6.24747  | ZNF335_ENSG00000198026                                 |
| 20 | 44650288 | 44650528 | KD2-H4K8ac_peak_19107 | 14.56955 | RP11-465L10.10_ENSG00000204044;SLC12A5_ENSG00000124140 |
| 20 | 44718074 | 44718575 | KD2-H4K8ac_peak_19108 | 17.42905 | NCOA5_ENSG00000124160                                  |
| 20 | 44767645 | 44768399 | KD2-H4K8ac_peak_19109 | 10.96455 |                                                        |
| 20 | 44768679 | 44769054 | KD2-H4K8ac_peak_19110 | 6.66359  |                                                        |
| 20 | 44777691 | 44777912 | KD2-H4K8ac_peak_19111 | 4.33002  |                                                        |
| 20 | 44960206 | 44960556 | KD2-H4K8ac_peak_19112 | 5.20908  |                                                        |
| 20 | 44960992 | 44961192 | KD2-H4K8ac_peak_19113 | 5.13615  |                                                        |
| 20 | 44962803 | 44963005 | KD2-H4K8ac_peak_19114 | 3.75035  |                                                        |
| 20 | 44992622 | 44993067 | KD2-H4K8ac_peak_19115 | 30.37291 | SLC35C2_ENSG00000080189                                |
| 20 | 45141835 | 45142159 | KD2-H4K8ac_peak_19116 | 13.12288 | ZNF334_ENSG00000198185                                 |
| 20 | 45190390 | 45190586 | KD2-H4K8ac_peak_19117 | 5.57044  |                                                        |
| 20 | 45190808 | 45191215 | KD2-H4K8ac_peak_19118 | 9.63487  |                                                        |
| 20 | 45191483 | 45191690 | KD2-H4K8ac_peak_19119 | 10.96455 |                                                        |
| 20 | 45200741 | 45201012 | KD2-H4K8ac_peak_19120 | 6.25869  |                                                        |
| 20 | 45337934 | 45338848 | KD2-H4K8ac_peak_19121 | 18.54875 | SLC2A10_ENSG00000197496                                |
| 20 | 45479055 | 45479320 | KD2-H4K8ac_peak_19122 | 8.1233   |                                                        |
| 20 | 45592266 | 45592486 | KD2-H4K8ac_peak_19123 | 7.40314  |                                                        |
| 20 | 45599893 | 45600098 | KD2-H4K8ac_peak_19124 | 6.00243  |                                                        |
| 20 | 45660490 | 45660687 | KD2-H4K8ac_peak_19125 | 3.75035  |                                                        |
| 20 | 45664560 | 45664843 | KD2-H4K8ac_peak_19126 | 9.1707   |                                                        |
| 20 | 45870828 | 45871089 | KD2-H4K8ac_peak_19127 | 3.69804  |                                                        |
| 20 | 45891052 | 45891270 | KD2-H4K8ac_peak_19128 | 4.44923  |                                                        |
| 20 | 45898562 | 45898821 | KD2-H4K8ac_peak_19129 | 5.25071  |                                                        |
| 20 | 45981339 | 45981614 | KD2-H4K8ac_peak_19130 | 6.40297  | RP4-569M23.2_ENSG00000231119                           |
| 20 | 45985659 | 45986849 | KD2-H4K8ac_peak_19131 | 29.92854 | ZMYND8_ENSG00000101040                                 |
| 20 | 45987497 | 45987922 | KD2-H4K8ac_peak_19132 | 8.85813  |                                                        |
| 20 | 45988860 | 45990437 | KD2-H4K8ac_peak_19133 | 11.05467 |                                                        |
| 20 | 45991203 | 45991469 | KD2-H4K8ac_peak_19134 | 5.82859  |                                                        |

|    |          |          |                       |          |                                                                      |
|----|----------|----------|-----------------------|----------|----------------------------------------------------------------------|
| 20 | 46096959 | 46097153 | KD2-H4K8ac_peak_19135 | 6.2781   |                                                                      |
| 20 | 46121470 | 46121680 | KD2-H4K8ac_peak_19136 | 4.75764  | RNU6-563P_ENSG00000201742                                            |
| 20 | 46130768 | 46131026 | KD2-H4K8ac_peak_19137 | 10.30284 | NCOA3_ENSG00000124151                                                |
| 20 | 46204938 | 46205133 | KD2-H4K8ac_peak_19138 | 5.55317  |                                                                      |
| 20 | 46336223 | 46336487 | KD2-H4K8ac_peak_19139 | 9.96941  |                                                                      |
| 20 | 46339206 | 46339479 | KD2-H4K8ac_peak_19140 | 7.35686  |                                                                      |
| 20 | 46429100 | 46429818 | KD2-H4K8ac_peak_19141 | 4.211    |                                                                      |
| 20 | 46586050 | 46586718 | KD2-H4K8ac_peak_19142 | 14.12659 | RP11-347D21.2_ENSG00000228503                                        |
| 20 | 46601366 | 46601607 | KD2-H4K8ac_peak_19143 | 4.42765  |                                                                      |
| 20 | 46653951 | 46654225 | KD2-H4K8ac_peak_19144 | 7.47462  |                                                                      |
| 20 | 46915774 | 46916066 | KD2-H4K8ac_peak_19145 | 6.56926  |                                                                      |
| 20 | 46996261 | 46996662 | KD2-H4K8ac_peak_19146 | 6.40683  |                                                                      |
| 20 | 47096406 | 47096795 | KD2-H4K8ac_peak_19147 | 6.72021  |                                                                      |
| 20 | 47236719 | 47237089 | KD2-H4K8ac_peak_19148 | 9.20193  |                                                                      |
| 20 | 47298684 | 47299172 | KD2-H4K8ac_peak_19149 | 7.61026  |                                                                      |
| 20 | 47367899 | 47368097 | KD2-H4K8ac_peak_19150 | 6.40683  |                                                                      |
| 20 | 47444801 | 47445228 | KD2-H4K8ac_peak_19151 | 14.63458 | PREX1_ENSG00000124126                                                |
| 20 | 47463234 | 47463667 | KD2-H4K8ac_peak_19152 | 5.01002  |                                                                      |
| 20 | 47537470 | 47537930 | KD2-H4K8ac_peak_19153 | 5.30799  | ARFGEF2_ENSG00000124198                                              |
| 20 | 47538337 | 47539197 | KD2-H4K8ac_peak_19154 | 9.89126  | ARFGEF2_ENSG00000124198                                              |
| 20 | 47662948 | 47663214 | KD2-H4K8ac_peak_19155 | 12.15474 | RP1-155G6.4_ENSG00000227431;CSE1L_ENSG00000124207                    |
| 20 | 47804407 | 47804630 | KD2-H4K8ac_peak_19156 | 6.00226  | STAU1_ENSG00000124214                                                |
| 20 | 47835070 | 47835358 | KD2-H4K8ac_peak_19157 | 5.57044  | DDX27_ENSG00000124228                                                |
| 20 | 47894700 | 47894950 | KD2-H4K8ac_peak_19158 | 9.63487  | ZNFX1_ENSG00000124201;ZFAS1_ENSG00000177410;SNORD12C_ENSG00000209042 |
| 20 | 47962264 | 47962480 | KD2-H4K8ac_peak_19159 | 4.86824  |                                                                      |
| 20 | 48004321 | 48004888 | KD2-H4K8ac_peak_19160 | 5.30799  |                                                                      |
| 20 | 48066621 | 48066864 | KD2-H4K8ac_peak_19161 | 7.59643  |                                                                      |
| 20 | 48184075 | 48184564 | KD2-H4K8ac_peak_19162 | 15.25814 | PTGIS_ENSG00000124212                                                |
| 20 | 48330060 | 48330340 | KD2-H4K8ac_peak_19163 | 19.39805 | B4GALT5_ENSG00000158470                                              |
| 20 | 48364191 | 48364394 | KD2-H4K8ac_peak_19164 | 6.03693  |                                                                      |
| 20 | 48364650 | 48364848 | KD2-H4K8ac_peak_19165 | 5.88845  |                                                                      |
| 20 | 48429075 | 48429644 | KD2-H4K8ac_peak_19166 | 11.70879 | SLC9A8_ENSG00000197818                                               |
| 20 | 48531645 | 48532792 | KD2-H4K8ac_peak_19167 | 16.822   | SPATA2_ENSG00000158480                                               |
| 20 | 48551878 | 48552605 | KD2-H4K8ac_peak_19168 | 12.08081 | RNF114_ENSG00000124226                                               |
| 20 | 48595763 | 48596342 | KD2-H4K8ac_peak_19169 | 8.55271  |                                                                      |
| 20 | 48605790 | 48607195 | KD2-H4K8ac_peak_19170 | 9.90914  |                                                                      |
| 20 | 48630441 | 48631375 | KD2-H4K8ac_peak_19171 | 8.55271  |                                                                      |
| 20 | 48631663 | 48632532 | KD2-H4K8ac_peak_19172 | 12.57143 |                                                                      |
| 20 | 48632827 | 48633171 | KD2-H4K8ac_peak_19173 | 8.4716   |                                                                      |
| 20 | 48636155 | 48636363 | KD2-H4K8ac_peak_19174 | 6.05809  |                                                                      |
| 20 | 48645858 | 48647055 | KD2-H4K8ac_peak_19175 | 12.42761 |                                                                      |
| 20 | 48657079 | 48657949 | KD2-H4K8ac_peak_19176 | 6.65673  | TRERNA1_ENSG00000231265                                              |
| 20 | 48663462 | 48663748 | KD2-H4K8ac_peak_19177 | 8.10216  |                                                                      |
| 20 | 48669255 | 48669705 | KD2-H4K8ac_peak_19178 | 4.06758  |                                                                      |
| 20 | 48669942 | 48670727 | KD2-H4K8ac_peak_19179 | 4.54006  |                                                                      |
| 20 | 48672294 | 48672516 | KD2-H4K8ac_peak_19180 | 10.05606 |                                                                      |

|    |          |          |                       |          |                                                           |
|----|----------|----------|-----------------------|----------|-----------------------------------------------------------|
| 20 | 48673871 | 48674075 | KD2-H4K8ac_peak_19181 | 3.97079  |                                                           |
| 20 | 48687333 | 48687547 | KD2-H4K8ac_peak_19182 | 3.65228  |                                                           |
| 20 | 48692326 | 48692555 | KD2-H4K8ac_peak_19183 | 8.21084  |                                                           |
| 20 | 48729200 | 48730270 | KD2-H4K8ac_peak_19184 | 9.95119  |                                                           |
| 20 | 48732847 | 48733386 | KD2-H4K8ac_peak_19185 | 11.35142 | UBE2V1_ENSG00000244687                                    |
| 20 | 48769766 | 48770133 | KD2-H4K8ac_peak_19186 | 4.06758  | TMEM189-UBE2V1_ENSG00000124208;TMEM189_ENSG00000240849    |
| 20 | 48770495 | 48770728 | KD2-H4K8ac_peak_19187 | 6.84261  | TMEM189-UBE2V1_ENSG00000124208;TMEM189_ENSG00000240849    |
| 20 | 48770950 | 48771166 | KD2-H4K8ac_peak_19188 | 4.86324  | TMEM189-UBE2V1_ENSG00000124208;TMEM189_ENSG00000240849    |
| 20 | 48782803 | 48783127 | KD2-H4K8ac_peak_19189 | 6.94954  | RP11-112L6.3_ENSG00000237595;RP11-112L6.2_ENSG00000234698 |
| 20 | 48806565 | 48806903 | KD2-H4K8ac_peak_19190 | 7.76329  | CEBPB_ENSG00000172216                                     |
| 20 | 48807674 | 48808732 | KD2-H4K8ac_peak_19191 | 8.16906  | CEBPB_ENSG00000172216                                     |
| 20 | 48809545 | 48809781 | KD2-H4K8ac_peak_19192 | 11.5673  |                                                           |
| 20 | 48890182 | 48890388 | KD2-H4K8ac_peak_19193 | 6.30229  |                                                           |
| 20 | 48912887 | 48913089 | KD2-H4K8ac_peak_19194 | 5.88845  |                                                           |
| 20 | 48920213 | 48921270 | KD2-H4K8ac_peak_19195 | 9.06369  |                                                           |
| 20 | 48921609 | 48921841 | KD2-H4K8ac_peak_19196 | 5.92591  |                                                           |
| 20 | 48922905 | 48923160 | KD2-H4K8ac_peak_19197 | 6.60096  |                                                           |
| 20 | 48925443 | 48925825 | KD2-H4K8ac_peak_19198 | 13.70753 |                                                           |
| 20 | 48995301 | 48995822 | KD2-H4K8ac_peak_19199 | 5.14125  |                                                           |
| 20 | 49031611 | 49032321 | KD2-H4K8ac_peak_19200 | 15.61313 |                                                           |
| 20 | 49032586 | 49032856 | KD2-H4K8ac_peak_19201 | 6.90231  |                                                           |
| 20 | 49115605 | 49115954 | KD2-H4K8ac_peak_19202 | 8.02571  |                                                           |
| 20 | 49126283 | 49126577 | KD2-H4K8ac_peak_19203 | 6.84261  | PTPN1_ENSG00000196396                                     |
| 20 | 49244804 | 49245631 | KD2-H4K8ac_peak_19204 | 12.60538 |                                                           |
| 20 | 49252264 | 49252461 | KD2-H4K8ac_peak_19205 | 8.98477  |                                                           |
| 20 | 49271244 | 49271442 | KD2-H4K8ac_peak_19206 | 5.51783  |                                                           |
| 20 | 49272387 | 49272696 | KD2-H4K8ac_peak_19207 | 5.37864  |                                                           |
| 20 | 49307580 | 49308167 | KD2-H4K8ac_peak_19208 | 7.76329  | FAM65C_ENSG00000042062                                    |
| 20 | 49332288 | 49332504 | KD2-H4K8ac_peak_19209 | 4.04247  |                                                           |
| 20 | 49341166 | 49341649 | KD2-H4K8ac_peak_19210 | 11.05407 |                                                           |
| 20 | 49347189 | 49347623 | KD2-H4K8ac_peak_19211 | 15.13261 | PARD6B_ENSG00000124171                                    |
| 20 | 49348026 | 49348400 | KD2-H4K8ac_peak_19212 | 10.46874 | PARD6B_ENSG00000124171                                    |
| 20 | 49379857 | 49380184 | KD2-H4K8ac_peak_19213 | 11.03331 |                                                           |
| 20 | 49407051 | 49407870 | KD2-H4K8ac_peak_19214 | 14.19272 |                                                           |
| 20 | 49411848 | 49412098 | KD2-H4K8ac_peak_19215 | 9.70057  | BCAS4_ENSG00000124243                                     |
| 20 | 49546704 | 49547735 | KD2-H4K8ac_peak_19216 | 11.80497 | ADNP_ENSG00000101126;RP5-914P20.5_ENSG00000259456         |
| 20 | 49575537 | 49575856 | KD2-H4K8ac_peak_19217 | 7.36799  | DPM1_ENSG00000000419;MOCS3_ENSG00000124217                |
| 20 | 49639263 | 49640367 | KD2-H4K8ac_peak_19218 | 15.82362 | KCNG1_ENSG00000026559                                     |
| 20 | 49711647 | 49711852 | KD2-H4K8ac_peak_19219 | 7.87794  |                                                           |
| 20 | 49737177 | 49737651 | KD2-H4K8ac_peak_19220 | 5.8536   |                                                           |
| 20 | 49742518 | 49742739 | KD2-H4K8ac_peak_19221 | 8.02571  |                                                           |
| 20 | 49749052 | 49749275 | KD2-H4K8ac_peak_19222 | 5.54647  | RPSAP1_ENSG00000228820                                    |
| 20 | 49755487 | 49755911 | KD2-H4K8ac_peak_19223 | 5.88845  |                                                           |
| 20 | 49772843 | 49773047 | KD2-H4K8ac_peak_19224 | 10.46264 |                                                           |
| 20 | 49774688 | 49774959 | KD2-H4K8ac_peak_19225 | 5.32933  |                                                           |
| 20 | 49854483 | 49854729 | KD2-H4K8ac_peak_19226 | 5.57044  |                                                           |

|    |          |          |                       |          |                                             |
|----|----------|----------|-----------------------|----------|---------------------------------------------|
| 20 | 50029092 | 50029390 | KD2-H4K8ac_peak_19227 | 11.05407 |                                             |
| 20 | 50061405 | 50061859 | KD2-H4K8ac_peak_19228 | 7.70289  |                                             |
| 20 | 50073788 | 50074033 | KD2-H4K8ac_peak_19229 | 8.37043  |                                             |
| 20 | 50079300 | 50079603 | KD2-H4K8ac_peak_19230 | 8.59579  |                                             |
| 20 | 50416962 | 50417245 | KD2-H4K8ac_peak_19231 | 6.1228   |                                             |
| 20 | 50417565 | 50418611 | KD2-H4K8ac_peak_19232 | 20.47312 | SALL4_ENSG00000101115                       |
| 20 | 50602088 | 50602484 | KD2-H4K8ac_peak_19233 | 10.21502 |                                             |
| 20 | 50807688 | 50808961 | KD2-H4K8ac_peak_19234 | 13.22091 |                                             |
| 20 | 51098749 | 51098964 | KD2-H4K8ac_peak_19235 | 5.71749  |                                             |
| 20 | 51512808 | 51513000 | KD2-H4K8ac_peak_19236 | 4.3015   |                                             |
| 20 | 51576121 | 51576334 | KD2-H4K8ac_peak_19237 | 4.56666  |                                             |
| 20 | 51589965 | 51590287 | KD2-H4K8ac_peak_19238 | 5.30799  |                                             |
| 20 | 51787059 | 51787589 | KD2-H4K8ac_peak_19239 | 7.27716  |                                             |
| 20 | 52110544 | 52110843 | KD2-H4K8ac_peak_19240 | 6.2159   |                                             |
| 20 | 52209484 | 52210187 | KD2-H4K8ac_peak_19241 | 10.86378 |                                             |
| 20 | 52210579 | 52210775 | KD2-H4K8ac_peak_19242 | 10.63441 |                                             |
| 20 | 52238255 | 52238483 | KD2-H4K8ac_peak_19243 | 5.57044  |                                             |
| 20 | 52239923 | 52240466 | KD2-H4K8ac_peak_19244 | 6.99815  |                                             |
| 20 | 52354329 | 52354561 | KD2-H4K8ac_peak_19245 | 7.12754  |                                             |
| 20 | 52530812 | 52531691 | KD2-H4K8ac_peak_19246 | 6.16888  |                                             |
| 20 | 52532078 | 52532358 | KD2-H4K8ac_peak_19247 | 8.30974  |                                             |
| 20 | 52533149 | 52533377 | KD2-H4K8ac_peak_19248 | 4.98072  |                                             |
| 20 | 52558703 | 52559056 | KD2-H4K8ac_peak_19249 | 4.86324  |                                             |
| 20 | 52630534 | 52630920 | KD2-H4K8ac_peak_19250 | 5.25071  |                                             |
| 20 | 52824325 | 52825151 | KD2-H4K8ac_peak_19251 | 9.20193  | PFDN4_ENSG00000101132                       |
| 20 | 53298506 | 53298827 | KD2-H4K8ac_peak_19252 | 6.2781   |                                             |
| 20 | 53459086 | 53459338 | KD2-H4K8ac_peak_19253 | 8.10216  |                                             |
| 20 | 53653102 | 53653315 | KD2-H4K8ac_peak_19254 | 8.02571  |                                             |
| 20 | 53711148 | 53711380 | KD2-H4K8ac_peak_19255 | 8.45238  |                                             |
| 20 | 54052983 | 54053220 | KD2-H4K8ac_peak_19256 | 7.12754  |                                             |
| 20 | 54053848 | 54054095 | KD2-H4K8ac_peak_19257 | 11.30637 |                                             |
| 20 | 54056014 | 54056225 | KD2-H4K8ac_peak_19258 | 7.79898  |                                             |
| 20 | 54092918 | 54093126 | KD2-H4K8ac_peak_19259 | 7.27716  |                                             |
| 20 | 54096528 | 54097298 | KD2-H4K8ac_peak_19260 | 4.44527  |                                             |
| 20 | 54365361 | 54365567 | KD2-H4K8ac_peak_19261 | 8.1233   |                                             |
| 20 | 54763148 | 54763409 | KD2-H4K8ac_peak_19262 | 6.31143  |                                             |
| 20 | 54935261 | 54935474 | KD2-H4K8ac_peak_19263 | 7.47462  |                                             |
| 20 | 54967045 | 54967237 | KD2-H4K8ac_peak_19264 | 8.55271  | AURKA_ENSG00000087586;CSTF1_ENSG00000101138 |
| 20 | 54967775 | 54968076 | KD2-H4K8ac_peak_19265 | 4.211    | AURKA_ENSG00000087586;CSTF1_ENSG00000101138 |
| 20 | 55033393 | 55033932 | KD2-H4K8ac_peak_19266 | 6.94255  | RPL39P_ENSG00000228601                      |
| 20 | 55776778 | 55777161 | KD2-H4K8ac_peak_19267 | 7.27716  |                                             |
| 20 | 55796220 | 55796426 | KD2-H4K8ac_peak_19268 | 9.1994   |                                             |
| 20 | 55816369 | 55816825 | KD2-H4K8ac_peak_19269 | 10.0692  |                                             |
| 20 | 55817021 | 55818770 | KD2-H4K8ac_peak_19270 | 15.22643 |                                             |
| 20 | 55819076 | 55819729 | KD2-H4K8ac_peak_19271 | 11.22681 |                                             |
| 20 | 55822073 | 55822277 | KD2-H4K8ac_peak_19272 | 6.72334  |                                             |

|    |          |          |                       |          |                                                   |
|----|----------|----------|-----------------------|----------|---------------------------------------------------|
| 20 | 55824265 | 55824512 | KD2-H4K8ac_peak_19273 | 6.40683  |                                                   |
| 20 | 55826035 | 55826295 | KD2-H4K8ac_peak_19274 | 3.82395  |                                                   |
| 20 | 55826500 | 55826847 | KD2-H4K8ac_peak_19275 | 9.06369  |                                                   |
| 20 | 55835462 | 55836150 | KD2-H4K8ac_peak_19276 | 5.58324  |                                                   |
| 20 | 55840273 | 55841280 | KD2-H4K8ac_peak_19277 | 9.16531  | BMP7_ENSG00000101144;RP4-813D12.3_ENSG00000226308 |
| 20 | 55841918 | 55842266 | KD2-H4K8ac_peak_19278 | 6.66692  | BMP7_ENSG00000101144;RP4-813D12.3_ENSG00000226308 |
| 20 | 55848208 | 55848456 | KD2-H4K8ac_peak_19279 | 6.76298  |                                                   |
| 20 | 55848690 | 55849428 | KD2-H4K8ac_peak_19280 | 6.72334  |                                                   |
| 20 | 55926396 | 55926809 | KD2-H4K8ac_peak_19281 | 9.36516  | RAE1_ENSG00000101146                              |
| 20 | 55965620 | 55966252 | KD2-H4K8ac_peak_19282 | 9.06369  | RBM38_ENSG00000132819                             |
| 20 | 55966579 | 55966878 | KD2-H4K8ac_peak_19283 | 7.47462  | RBM38_ENSG00000132819                             |
| 20 | 56015720 | 56016784 | KD2-H4K8ac_peak_19284 | 7.36799  |                                                   |
| 20 | 56025814 | 56026390 | KD2-H4K8ac_peak_19285 | 7.40314  |                                                   |
| 20 | 56027493 | 56027705 | KD2-H4K8ac_peak_19286 | 5.43522  |                                                   |
| 20 | 56046438 | 56046713 | KD2-H4K8ac_peak_19287 | 5.14125  |                                                   |
| 20 | 56171809 | 56172120 | KD2-H4K8ac_peak_19288 | 11.02863 |                                                   |
| 20 | 56203655 | 56204035 | KD2-H4K8ac_peak_19289 | 11.43863 |                                                   |
| 20 | 56241652 | 56242557 | KD2-H4K8ac_peak_19290 | 5.01002  |                                                   |
| 20 | 56242958 | 56243300 | KD2-H4K8ac_peak_19291 | 6.60096  |                                                   |
| 20 | 56243698 | 56244058 | KD2-H4K8ac_peak_19292 | 4.211    |                                                   |
| 20 | 56245286 | 56245634 | KD2-H4K8ac_peak_19293 | 4.06758  |                                                   |
| 20 | 56247568 | 56247998 | KD2-H4K8ac_peak_19294 | 7.20567  |                                                   |
| 20 | 56257186 | 56257652 | KD2-H4K8ac_peak_19295 | 8.33649  |                                                   |
| 20 | 56259428 | 56259766 | KD2-H4K8ac_peak_19296 | 11.92978 |                                                   |
| 20 | 56260756 | 56261760 | KD2-H4K8ac_peak_19297 | 7.47462  |                                                   |
| 20 | 56284347 | 56284557 | KD2-H4K8ac_peak_19298 | 7.11925  |                                                   |
| 20 | 56321819 | 56322364 | KD2-H4K8ac_peak_19299 | 9.1707   |                                                   |
| 20 | 56323188 | 56323394 | KD2-H4K8ac_peak_19300 | 5.75757  |                                                   |
| 20 | 56324067 | 56324607 | KD2-H4K8ac_peak_19301 | 12.93253 |                                                   |
| 20 | 56383293 | 56383510 | KD2-H4K8ac_peak_19302 | 5.75452  |                                                   |
| 20 | 56412639 | 56412859 | KD2-H4K8ac_peak_19303 | 5.61067  |                                                   |
| 20 | 56413149 | 56413802 | KD2-H4K8ac_peak_19304 | 16.57619 |                                                   |
| 20 | 56414355 | 56415373 | KD2-H4K8ac_peak_19305 | 11.66477 |                                                   |
| 20 | 56441770 | 56441962 | KD2-H4K8ac_peak_19306 | 6.8836   |                                                   |
| 20 | 56457516 | 56457989 | KD2-H4K8ac_peak_19307 | 14.06758 |                                                   |
| 20 | 56504938 | 56505501 | KD2-H4K8ac_peak_19308 | 5.88845  |                                                   |
| 20 | 56569007 | 56569292 | KD2-H4K8ac_peak_19309 | 11.86082 |                                                   |
| 20 | 56574417 | 56574685 | KD2-H4K8ac_peak_19310 | 4.06758  |                                                   |
| 20 | 56576234 | 56576428 | KD2-H4K8ac_peak_19311 | 4.86324  |                                                   |
| 20 | 56576801 | 56577045 | KD2-H4K8ac_peak_19312 | 8.26945  |                                                   |
| 20 | 56613183 | 56613685 | KD2-H4K8ac_peak_19313 | 15.81711 |                                                   |
| 20 | 56614493 | 56615474 | KD2-H4K8ac_peak_19314 | 9.95119  |                                                   |
| 20 | 56618123 | 56618462 | KD2-H4K8ac_peak_19315 | 10.99466 |                                                   |
| 20 | 56619848 | 56620451 | KD2-H4K8ac_peak_19316 | 10.70006 |                                                   |
| 20 | 56621316 | 56621786 | KD2-H4K8ac_peak_19317 | 18.82114 |                                                   |
| 20 | 56622477 | 56623190 | KD2-H4K8ac_peak_19318 | 13.81781 |                                                   |



|    |          |          |                       |          |                                                    |
|----|----------|----------|-----------------------|----------|----------------------------------------------------|
| 20 | 56662219 | 56662413 | KD2-H4K8ac_peak_19319 | 4.42765  |                                                    |
| 20 | 56706075 | 56706375 | KD2-H4K8ac_peak_19320 | 4.44923  |                                                    |
| 20 | 56749478 | 56750059 | KD2-H4K8ac_peak_19321 | 7.07117  |                                                    |
| 20 | 56750607 | 56750857 | KD2-H4K8ac_peak_19322 | 11.09936 |                                                    |
| 20 | 56803134 | 56803637 | KD2-H4K8ac_peak_19323 | 9.08816  | ANKRD60_ENSG00000124227                            |
| 20 | 56883745 | 56884517 | KD2-H4K8ac_peak_19324 | 16.32216 | PPP4R1L_ENSG00000124224;RAB22A_ENSG00000124209     |
| 20 | 56884796 | 56885237 | KD2-H4K8ac_peak_19325 | 15.81711 | PPP4R1L_ENSG00000124224;RAB22A_ENSG00000124209     |
| 20 | 56964406 | 56964798 | KD2-H4K8ac_peak_19326 | 8.10216  | VAPB_ENSG00000124164                               |
| 20 | 57032940 | 57033152 | KD2-H4K8ac_peak_19327 | 7.40314  |                                                    |
| 20 | 57046205 | 57046459 | KD2-H4K8ac_peak_19328 | 6.84261  |                                                    |
| 20 | 57046977 | 57047328 | KD2-H4K8ac_peak_19329 | 5.1707   |                                                    |
| 20 | 57186482 | 57187026 | KD2-H4K8ac_peak_19330 | 7.27716  |                                                    |
| 20 | 57210250 | 57210606 | KD2-H4K8ac_peak_19331 | 5.57044  | MGC4294_ENSG00000268941                            |
| 20 | 57225036 | 57225515 | KD2-H4K8ac_peak_19332 | 4.67342  | STX16_ENSG00000124222;STX16-NPEPL1_ENSG00000254995 |
| 20 | 57225944 | 57226669 | KD2-H4K8ac_peak_19333 | 15.82362 | STX16_ENSG00000124222;STX16-NPEPL1_ENSG00000254995 |
| 20 | 57452298 | 57452967 | KD2-H4K8ac_peak_19334 | 13.92307 | RP1-309F20.4_ENSG00000270951                       |
| 20 | 57454987 | 57455317 | KD2-H4K8ac_peak_19335 | 6.05809  |                                                    |
| 20 | 57464024 | 57464243 | KD2-H4K8ac_peak_19336 | 6.56211  | RP1-309F20.3_ENSG00000225806                       |
| 20 | 57465578 | 57465876 | KD2-H4K8ac_peak_19337 | 6.52179  |                                                    |
| 20 | 57466202 | 57466442 | KD2-H4K8ac_peak_19338 | 4.56666  |                                                    |
| 20 | 57466793 | 57467316 | KD2-H4K8ac_peak_19339 | 5.14125  |                                                    |
| 20 | 57473764 | 57473978 | KD2-H4K8ac_peak_19340 | 6.4095   |                                                    |
| 20 | 57555523 | 57556145 | KD2-H4K8ac_peak_19341 | 7.76329  | NELFCD_ENSG00000101158                             |
| 20 | 57556387 | 57556585 | KD2-H4K8ac_peak_19342 | 10.46874 | NELFCD_ENSG00000101158                             |
| 20 | 57607081 | 57607307 | KD2-H4K8ac_peak_19343 | 6.40874  | ATP5E_ENSG00000124172                              |
| 20 | 57617242 | 57617781 | KD2-H4K8ac_peak_19344 | 5.08628  | SLMO2_ENSG00000101166                              |
| 20 | 57618126 | 57618556 | KD2-H4K8ac_peak_19345 | 5.9696   | SLMO2_ENSG00000101166                              |
| 20 | 57638493 | 57638717 | KD2-H4K8ac_peak_19346 | 7.12754  |                                                    |
| 20 | 57797021 | 57797487 | KD2-H4K8ac_peak_19347 | 8.53092  |                                                    |
| 20 | 57893542 | 57893736 | KD2-H4K8ac_peak_19348 | 7.48958  |                                                    |
| 20 | 57896910 | 57897221 | KD2-H4K8ac_peak_19349 | 4.70206  |                                                    |
| 20 | 57931283 | 57931706 | KD2-H4K8ac_peak_19350 | 6.2781   |                                                    |
| 20 | 57965908 | 57966229 | KD2-H4K8ac_peak_19351 | 7.95563  |                                                    |
| 20 | 57974616 | 57974901 | KD2-H4K8ac_peak_19352 | 3.85282  |                                                    |
| 20 | 57978365 | 57978901 | KD2-H4K8ac_peak_19353 | 13.36684 |                                                    |
| 20 | 57987664 | 57987887 | KD2-H4K8ac_peak_19354 | 4.67342  |                                                    |
| 20 | 57999110 | 57999328 | KD2-H4K8ac_peak_19355 | 5.14125  |                                                    |
| 20 | 58001584 | 58001788 | KD2-H4K8ac_peak_19356 | 5.14125  |                                                    |
| 20 | 58146828 | 58147385 | KD2-H4K8ac_peak_19357 | 13.73635 |                                                    |
| 20 | 58152220 | 58152763 | KD2-H4K8ac_peak_19358 | 6.83936  | PHACTR3_ENSG00000087495                            |
| 20 | 58178946 | 58179447 | KD2-H4K8ac_peak_19359 | 12.84642 |                                                    |
| 20 | 58179744 | 58180810 | KD2-H4K8ac_peak_19360 | 6.65673  |                                                    |
| 20 | 58508376 | 58508741 | KD2-H4K8ac_peak_19361 | 13.36684 | SYCP2_ENSG00000196074;FAM217B_ENSG00000196227      |
| 20 | 58508970 | 58509179 | KD2-H4K8ac_peak_19362 | 8.4716   | SYCP2_ENSG00000196074;FAM217B_ENSG00000196227      |
| 20 | 58514593 | 58514791 | KD2-H4K8ac_peak_19363 | 6.2159   | PPP1R3D_ENSG00000132825                            |
| 20 | 58516101 | 58516339 | KD2-H4K8ac_peak_19364 | 5.9696   | PPP1R3D_ENSG00000132825                            |

|    |          |          |                       |          |                                                      |
|----|----------|----------|-----------------------|----------|------------------------------------------------------|
| 20 | 60640665 | 60640858 | KD2-H4K8ac_peak_19365 | 12.04009 | TAF4_ENSG00000130699;hsa-mir-3195_ENSG00000265306    |
| 20 | 60641527 | 60641756 | KD2-H4K8ac_peak_19366 | 6.66692  | TAF4_ENSG00000130699                                 |
| 20 | 60697628 | 60697906 | KD2-H4K8ac_peak_19367 | 4.42765  | LSM14B_ENSG00000149657                               |
| 20 | 60717769 | 60718789 | KD2-H4K8ac_peak_19368 | 20.6423  | PSMA7_ENSG00000101182;SS18L1_ENSG00000184402         |
| 20 | 60719103 | 60719364 | KD2-H4K8ac_peak_19369 | 10.86318 | PSMA7_ENSG00000101182;SS18L1_ENSG00000184402         |
| 20 | 60751536 | 60752265 | KD2-H4K8ac_peak_19370 | 12.06346 |                                                      |
| 20 | 60752675 | 60752938 | KD2-H4K8ac_peak_19371 | 7.47462  |                                                      |
| 20 | 60757574 | 60758738 | KD2-H4K8ac_peak_19372 | 14.8083  | MTG2_ENSG00000101181                                 |
| 20 | 60785088 | 60785376 | KD2-H4K8ac_peak_19373 | 5.02474  |                                                      |
| 20 | 60785618 | 60786079 | KD2-H4K8ac_peak_19374 | 7.47462  |                                                      |
| 20 | 60877570 | 60877777 | KD2-H4K8ac_peak_19375 | 8.79106  | ADRM1_ENSG00000130706                                |
| 20 | 60878119 | 60878689 | KD2-H4K8ac_peak_19376 | 7.74292  | ADRM1_ENSG00000130706                                |
| 20 | 60927087 | 60927616 | KD2-H4K8ac_peak_19377 | 9.49967  | RP11-157P1.5_ENSG00000228812                         |
| 20 | 60928205 | 60928885 | KD2-H4K8ac_peak_19378 | 12.00597 | RP11-157P1.5_ENSG00000228812                         |
| 20 | 60929530 | 60930465 | KD2-H4K8ac_peak_19379 | 10.73134 |                                                      |
| 20 | 60930718 | 60931085 | KD2-H4K8ac_peak_19380 | 9.57101  |                                                      |
| 20 | 60931619 | 60932489 | KD2-H4K8ac_peak_19381 | 6.20982  |                                                      |
| 20 | 60941805 | 60943935 | KD2-H4K8ac_peak_19382 | 18.86697 | LAMA5_ENSG00000130702                                |
| 20 | 60945614 | 60946065 | KD2-H4K8ac_peak_19383 | 8.16906  |                                                      |
| 20 | 60947572 | 60947980 | KD2-H4K8ac_peak_19384 | 5.94136  |                                                      |
| 20 | 60961430 | 60961846 | KD2-H4K8ac_peak_19385 | 8.85813  | RPS21_ENSG00000171858                                |
| 20 | 60962286 | 60962866 | KD2-H4K8ac_peak_19386 | 11.09936 | RPS21_ENSG00000171858                                |
| 20 | 60981880 | 60982151 | KD2-H4K8ac_peak_19387 | 10.08707 | CABLES2_ENSG00000149679                              |
| 20 | 60982510 | 60983015 | KD2-H4K8ac_peak_19388 | 19.55721 | CABLES2_ENSG00000149679                              |
| 20 | 60983286 | 60983538 | KD2-H4K8ac_peak_19389 | 5.54647  | CABLES2_ENSG00000149679                              |
| 20 | 60985526 | 60985929 | KD2-H4K8ac_peak_19390 | 5.75757  |                                                      |
| 20 | 61071037 | 61071420 | KD2-H4K8ac_peak_19391 | 7.29632  |                                                      |
| 20 | 61265392 | 61265666 | KD2-H4K8ac_peak_19392 | 6.2781   | RP13-30A9.2_ENSG00000229882                          |
| 20 | 61270175 | 61270438 | KD2-H4K8ac_peak_19393 | 8.1718   |                                                      |
| 20 | 61273248 | 61273653 | KD2-H4K8ac_peak_19394 | 7.73264  | SLCO4A1_ENSG00000101187                              |
| 20 | 61273849 | 61274779 | KD2-H4K8ac_peak_19395 | 8.59301  | RP11-93B14.6_ENSG00000167046;SLCO4A1_ENSG00000101187 |
| 20 | 61278308 | 61278545 | KD2-H4K8ac_peak_19396 | 9.96798  |                                                      |
| 20 | 61279182 | 61279900 | KD2-H4K8ac_peak_19397 | 7.40314  |                                                      |
| 20 | 61280437 | 61280710 | KD2-H4K8ac_peak_19398 | 5.9696   |                                                      |
| 20 | 61281163 | 61281409 | KD2-H4K8ac_peak_19399 | 7.44324  |                                                      |
| 20 | 61281729 | 61282348 | KD2-H4K8ac_peak_19400 | 16.71655 |                                                      |
| 20 | 61283103 | 61284364 | KD2-H4K8ac_peak_19401 | 11.24702 |                                                      |
| 20 | 61306031 | 61306660 | KD2-H4K8ac_peak_19402 | 17.63891 |                                                      |
| 20 | 61307039 | 61307297 | KD2-H4K8ac_peak_19403 | 5.88845  |                                                      |
| 20 | 61343030 | 61343241 | KD2-H4K8ac_peak_19404 | 7.07117  |                                                      |
| 20 | 61407953 | 61408235 | KD2-H4K8ac_peak_19405 | 7.96322  |                                                      |
| 20 | 61408667 | 61408947 | KD2-H4K8ac_peak_19406 | 8.17902  |                                                      |
| 20 | 61415766 | 61416095 | KD2-H4K8ac_peak_19407 | 4.77079  |                                                      |
| 20 | 61416954 | 61417167 | KD2-H4K8ac_peak_19408 | 4.42765  |                                                      |
| 20 | 61417449 | 61417715 | KD2-H4K8ac_peak_19409 | 4.67342  |                                                      |
| 20 | 61426870 | 61427332 | KD2-H4K8ac_peak_19410 | 16.89856 | MRGBP_ENSG00000101189                                |

|    |          |          |                       |          |                                                      |
|----|----------|----------|-----------------------|----------|------------------------------------------------------|
| 20 | 61427876 | 61428107 | KD2-H4K8ac_peak_19411 | 13.21541 | MRGBP_ENSG00000101189                                |
| 20 | 61435535 | 61435912 | KD2-H4K8ac_peak_19412 | 14.8083  | OGFR_ENSG00000060491                                 |
| 20 | 61448733 | 61451757 | KD2-H4K8ac_peak_19413 | 13.95627 |                                                      |
| 20 | 61454876 | 61455105 | KD2-H4K8ac_peak_19414 | 6.45083  |                                                      |
| 20 | 61456017 | 61456338 | KD2-H4K8ac_peak_19415 | 8.55271  |                                                      |
| 20 | 61456649 | 61457093 | KD2-H4K8ac_peak_19416 | 5.9696   |                                                      |
| 20 | 61507153 | 61507870 | KD2-H4K8ac_peak_19417 | 13.44374 |                                                      |
| 20 | 61508386 | 61508769 | KD2-H4K8ac_peak_19418 | 5.88845  |                                                      |
| 20 | 61557254 | 61557834 | KD2-H4K8ac_peak_19419 | 9.95119  |                                                      |
| 20 | 61568863 | 61569210 | KD2-H4K8ac_peak_19420 | 11.80283 | DIDO1_ENSG00000101191;GID8_ENSG00000101193           |
| 20 | 61569488 | 61569968 | KD2-H4K8ac_peak_19421 | 27.41885 | DIDO1_ENSG00000101191;GID8_ENSG00000101193           |
| 20 | 61846802 | 61847241 | KD2-H4K8ac_peak_19422 | 4.67342  | YTHDF1_ENSG00000149658                               |
| 20 | 61847829 | 61848099 | KD2-H4K8ac_peak_19423 | 9.95119  | YTHDF1_ENSG00000149658                               |
| 20 | 61904216 | 61904710 | KD2-H4K8ac_peak_19424 | 7.47462  | NKAIN4_ENSG00000101198;ARFGAP1_ENSG00000101199       |
| 20 | 61940696 | 61940957 | KD2-H4K8ac_peak_19425 | 4.86324  |                                                      |
| 20 | 62047552 | 62048064 | KD2-H4K8ac_peak_19426 | 12.84642 |                                                      |
| 20 | 62048355 | 62048613 | KD2-H4K8ac_peak_19427 | 8.4716   |                                                      |
| 20 | 62084481 | 62085320 | KD2-H4K8ac_peak_19428 | 12.82393 |                                                      |
| 20 | 62085564 | 62086527 | KD2-H4K8ac_peak_19429 | 21.14153 |                                                      |
| 20 | 62086735 | 62087212 | KD2-H4K8ac_peak_19430 | 15.12992 |                                                      |
| 20 | 62087448 | 62088227 | KD2-H4K8ac_peak_19431 | 17.51891 |                                                      |
| 20 | 62088584 | 62089651 | KD2-H4K8ac_peak_19432 | 20.30085 |                                                      |
| 20 | 62089888 | 62090307 | KD2-H4K8ac_peak_19433 | 6.12046  |                                                      |
| 20 | 62093640 | 62094139 | KD2-H4K8ac_peak_19434 | 5.8057   |                                                      |
| 20 | 62094561 | 62095189 | KD2-H4K8ac_peak_19435 | 10.20041 |                                                      |
| 20 | 62095647 | 62095872 | KD2-H4K8ac_peak_19436 | 7.28827  |                                                      |
| 20 | 62102511 | 62102846 | KD2-H4K8ac_peak_19437 | 6.30607  |                                                      |
| 20 | 62103342 | 62103950 | KD2-H4K8ac_peak_19438 | 3.97079  | KCNQ2_ENSG00000075043                                |
| 20 | 62104481 | 62104799 | KD2-H4K8ac_peak_19439 | 7.76329  | KCNQ2_ENSG00000075043                                |
| 20 | 62113388 | 62113808 | KD2-H4K8ac_peak_19440 | 8.23274  |                                                      |
| 20 | 62114181 | 62114427 | KD2-H4K8ac_peak_19441 | 4.7158   |                                                      |
| 20 | 62115156 | 62115514 | KD2-H4K8ac_peak_19442 | 6.66692  |                                                      |
| 20 | 62128022 | 62128280 | KD2-H4K8ac_peak_19443 | 5.75452  |                                                      |
| 20 | 62129615 | 62130962 | KD2-H4K8ac_peak_19444 | 17.8868  | EEF1A2_ENSG00000101210                               |
| 20 | 62133653 | 62134261 | KD2-H4K8ac_peak_19445 | 11.24702 | RP4-697K14.3_ENSG00000230226                         |
| 20 | 62150936 | 62151271 | KD2-H4K8ac_peak_19446 | 6.65673  | PPDPF_ENSG00000125534                                |
| 20 | 62151617 | 62151933 | KD2-H4K8ac_peak_19447 | 11.8457  | PPDPF_ENSG00000125534                                |
| 20 | 62167702 | 62168402 | KD2-H4K8ac_peak_19448 | 10.7679  | PTK6_ENSG00000101213                                 |
| 20 | 62169050 | 62169446 | KD2-H4K8ac_peak_19449 | 9.91109  | PTK6_ENSG00000101213                                 |
| 20 | 62184018 | 62184519 | KD2-H4K8ac_peak_19450 | 5.59859  | C20orf195_ENSG00000125531                            |
| 20 | 62185177 | 62185487 | KD2-H4K8ac_peak_19451 | 6.99815  | C20orf195_ENSG00000125531                            |
| 20 | 62205671 | 62206202 | KD2-H4K8ac_peak_19452 | 9.63487  | HELZ2_ENSG00000130589                                |
| 20 | 62257644 | 62258782 | KD2-H4K8ac_peak_19453 | 20.78681 | GMEB2_ENSG00000101216;CTD-3184A7.4_ENSG00000232442   |
| 20 | 62283981 | 62284709 | KD2-H4K8ac_peak_19454 | 5.01002  | STMN3_ENSG00000197457                                |
| 20 | 62285383 | 62285923 | KD2-H4K8ac_peak_19455 | 6.8713   | STMN3_ENSG00000197457                                |
| 20 | 62289041 | 62290153 | KD2-H4K8ac_peak_19456 | 11.50346 | RTEL1_ENSG00000258366;RTEL1-TNFRSF6B_ENSG00000026036 |

|    |          |          |                       |          |                                                                            |
|----|----------|----------|-----------------------|----------|----------------------------------------------------------------------------|
| 20 | 62338623 | 62340013 | KD2-H4K8ac_peak_19457 | 13.70753 | ARFRP1_ENSG00000101246;ZGPAT_ENSG00000197114;RP4-583P15.15_ENSG00000273154 |
| 20 | 62406416 | 62406860 | KD2-H4K8ac_peak_19458 | 4.91674  |                                                                            |
| 20 | 62417843 | 62418145 | KD2-H4K8ac_peak_19459 | 6.56926  |                                                                            |
| 20 | 62462829 | 62463032 | KD2-H4K8ac_peak_19460 | 7.47462  | ZBTB46_ENSG00000130584                                                     |
| 20 | 62465761 | 62466302 | KD2-H4K8ac_peak_19461 | 9.08816  |                                                                            |
| 20 | 62466554 | 62466822 | KD2-H4K8ac_peak_19462 | 9.20193  |                                                                            |
| 20 | 62485638 | 62487101 | KD2-H4K8ac_peak_19463 | 10.30284 |                                                                            |
| 20 | 62495904 | 62496279 | KD2-H4K8ac_peak_19464 | 5.349    | TPD52L2_ENSG00000101150                                                    |
| 20 | 62496760 | 62497033 | KD2-H4K8ac_peak_19465 | 7.49599  | TPD52L2_ENSG00000101150                                                    |
| 20 | 62587213 | 62587703 | KD2-H4K8ac_peak_19466 | 16.57619 | UCKL1_ENSG00000198276                                                      |
| 20 | 62588377 | 62588613 | KD2-H4K8ac_peak_19467 | 5.59859  | UCKL1_ENSG00000198276                                                      |
| 20 | 62600571 | 62601189 | KD2-H4K8ac_peak_19468 | 11.05467 |                                                                            |
| 20 | 62601428 | 62601785 | KD2-H4K8ac_peak_19469 | 14.87555 |                                                                            |
| 20 | 62610273 | 62612906 | KD2-H4K8ac_peak_19470 | 14.8083  | SAMD10_ENSG00000130590;PRPF6_ENSG00000101161                               |
| 20 | 62670114 | 62670847 | KD2-H4K8ac_peak_19471 | 14.12659 |                                                                            |
| 20 | 62673303 | 62674027 | KD2-H4K8ac_peak_19472 | 16.8435  |                                                                            |
| 20 | 62685523 | 62685824 | KD2-H4K8ac_peak_19473 | 11.24702 |                                                                            |
| 20 | 62693853 | 62694330 | KD2-H4K8ac_peak_19474 | 28.26254 |                                                                            |
| 20 | 62709929 | 62710144 | KD2-H4K8ac_peak_19475 | 5.82859  |                                                                            |
| 20 | 62710535 | 62711158 | KD2-H4K8ac_peak_19476 | 14.23999 | RGS19_ENSG00000171700;OPRL1_ENSG00000125510                                |
| 20 | 62715133 | 62715618 | KD2-H4K8ac_peak_19477 | 8.10216  | C20orf201_ENSG00000171695                                                  |
| 20 | 62733705 | 62733922 | KD2-H4K8ac_peak_19478 | 7.74292  |                                                                            |
| 20 | 62778136 | 62778589 | KD2-H4K8ac_peak_19479 | 10.05606 |                                                                            |
| 20 | 62785919 | 62786412 | KD2-H4K8ac_peak_19480 | 8.86099  |                                                                            |
| 20 | 62786986 | 62788012 | KD2-H4K8ac_peak_19481 | 5.30799  |                                                                            |
| 20 | 62886532 | 62886920 | KD2-H4K8ac_peak_19482 | 9.01262  | PCMTD2_ENSG00000203880                                                     |
| 20 | 62887154 | 62887392 | KD2-H4K8ac_peak_19483 | 6.48713  | PCMTD2_ENSG00000203880                                                     |
| 21 | 10596378 | 10596795 | KD2-H4K8ac_peak_19484 | 3.82395  |                                                                            |
| 21 | 10597131 | 10598417 | KD2-H4K8ac_peak_19485 | 9.44322  |                                                                            |
| 21 | 10602023 | 10602672 | KD2-H4K8ac_peak_19486 | 9.56945  |                                                                            |
| 21 | 15435699 | 15435931 | KD2-H4K8ac_peak_19487 | 4.42765  | ANKRD20A18P_ENSG00000249493                                                |
| 21 | 17443194 | 17443601 | KD2-H4K8ac_peak_19488 | 5.57044  | LINC00478_ENSG00000215386                                                  |
| 21 | 17791053 | 17791524 | KD2-H4K8ac_peak_19489 | 6.16888  | AP001172.3_ENSG00000270139                                                 |
| 21 | 17960543 | 17960736 | KD2-H4K8ac_peak_19490 | 5.20908  |                                                                            |
| 21 | 18827961 | 18828173 | KD2-H4K8ac_peak_19491 | 6.82976  |                                                                            |
| 21 | 18885047 | 18885884 | KD2-H4K8ac_peak_19492 | 12.08081 | CXADR_ENSG00000154639                                                      |
| 21 | 18984314 | 18984541 | KD2-H4K8ac_peak_19493 | 4.8888   | BTG3_ENSG00000154640                                                       |
| 21 | 18984918 | 18985122 | KD2-H4K8ac_peak_19494 | 6.25869  | BTG3_ENSG00000154640                                                       |
| 21 | 18985369 | 18985873 | KD2-H4K8ac_peak_19495 | 26.621   | BTG3_ENSG00000154640                                                       |
| 21 | 19191135 | 19191999 | KD2-H4K8ac_peak_19496 | 16.8435  | C21orf91_ENSG00000154642                                                   |
| 21 | 22370076 | 22370503 | KD2-H4K8ac_peak_19497 | 6.66359  | NCAM2_ENSG00000154654                                                      |
| 21 | 24116178 | 24116406 | KD2-H4K8ac_peak_19498 | 7.27716  |                                                                            |
| 21 | 26979442 | 26979813 | KD2-H4K8ac_peak_19499 | 16.54484 | MRPL39_ENSG00000154719                                                     |
| 21 | 27011146 | 27012292 | KD2-H4K8ac_peak_19500 | 10.65724 | JAM2_ENSG00000154721                                                       |
| 21 | 27106916 | 27107233 | KD2-H4K8ac_peak_19501 | 10.05606 | ATP5J_ENSG00000154723;GABPA_ENSG00000154727                                |
| 21 | 27107453 | 27108382 | KD2-H4K8ac_peak_19502 | 24.85162 | ATP5J_ENSG00000154723;GABPA_ENSG00000154727                                |

|    |          |          |                       |          |                                                      |
|----|----------|----------|-----------------------|----------|------------------------------------------------------|
| 21 | 27162636 | 27163133 | KD2-H4K8ac_peak_19503 | 7.59643  |                                                      |
| 21 | 27541664 | 27542171 | KD2-H4K8ac_peak_19504 | 7.38799  |                                                      |
| 21 | 27542404 | 27543360 | KD2-H4K8ac_peak_19505 | 6.55628  | APP_ENSG00000142192;AP000230.1_ENSG00000273492       |
| 21 | 27926186 | 27926400 | KD2-H4K8ac_peak_19506 | 9.15329  |                                                      |
| 21 | 27959658 | 27959926 | KD2-H4K8ac_peak_19507 | 5.07241  |                                                      |
| 21 | 28218003 | 28219155 | KD2-H4K8ac_peak_19508 | 6.40297  | ADAMTS1_ENSG00000154734                              |
| 21 | 28338280 | 28338650 | KD2-H4K8ac_peak_19509 | 4.06758  | ADAMTS5_ENSG00000154736                              |
| 21 | 28339707 | 28340248 | KD2-H4K8ac_peak_19510 | 15.22643 | ADAMTS5_ENSG00000154736                              |
| 21 | 29630664 | 29630932 | KD2-H4K8ac_peak_19511 | 5.57044  |                                                      |
| 21 | 29642352 | 29642581 | KD2-H4K8ac_peak_19512 | 8.1233   |                                                      |
| 21 | 29706763 | 29706966 | KD2-H4K8ac_peak_19513 | 6.16888  |                                                      |
| 21 | 29707598 | 29707856 | KD2-H4K8ac_peak_19514 | 5.14125  |                                                      |
| 21 | 29731526 | 29731755 | KD2-H4K8ac_peak_19515 | 6.00226  |                                                      |
| 21 | 29754209 | 29754461 | KD2-H4K8ac_peak_19516 | 5.14125  |                                                      |
| 21 | 30257462 | 30257676 | KD2-H4K8ac_peak_19517 | 14.8083  | N6AMT1_ENSG00000156239                               |
| 21 | 30375195 | 30375413 | KD2-H4K8ac_peak_19518 | 8.55271  |                                                      |
| 21 | 30391292 | 30391549 | KD2-H4K8ac_peak_19519 | 6.99815  | RWDD2B_ENSG00000156253                               |
| 21 | 30391846 | 30392176 | KD2-H4K8ac_peak_19520 | 10.96455 | RWDD2B_ENSG00000156253                               |
| 21 | 30396302 | 30396656 | KD2-H4K8ac_peak_19521 | 7.45501  | RP1-100J12.1_ENSG00000273254;USP16_ENSG00000156256   |
| 21 | 30397002 | 30397215 | KD2-H4K8ac_peak_19522 | 14.80472 | RP1-100J12.1_ENSG00000273254;USP16_ENSG00000156256   |
| 21 | 30445510 | 30445931 | KD2-H4K8ac_peak_19523 | 12.88108 | CCT8_ENSG00000156261                                 |
| 21 | 30565744 | 30566243 | KD2-H4K8ac_peak_19524 | 6.40683  | LINC00189_ENSG00000215533;BACH1_ENSG00000156273      |
| 21 | 30670600 | 30671865 | KD2-H4K8ac_peak_19525 | 11.05467 |                                                      |
| 21 | 32518312 | 32518552 | KD2-H4K8ac_peak_19526 | 5.6755   |                                                      |
| 21 | 32536500 | 32536704 | KD2-H4K8ac_peak_19527 | 6.40683  |                                                      |
| 21 | 32544156 | 32544468 | KD2-H4K8ac_peak_19528 | 9.11031  |                                                      |
| 21 | 32546433 | 32546641 | KD2-H4K8ac_peak_19529 | 5.10505  |                                                      |
| 21 | 32546978 | 32547594 | KD2-H4K8ac_peak_19530 | 10.54933 |                                                      |
| 21 | 32932082 | 32932603 | KD2-H4K8ac_peak_19531 | 14.43704 | TIAM1_ENSG00000156299;AP000251.3_ENSG00000237594     |
| 21 | 33032039 | 33032264 | KD2-H4K8ac_peak_19532 | 8.30974  | AP000253.1_ENSG00000234509;SOD1_ENSG00000142168      |
| 21 | 33103803 | 33104201 | KD2-H4K8ac_peak_19533 | 8.17902  | SCAF4_ENSG00000156304                                |
| 21 | 33104636 | 33105072 | KD2-H4K8ac_peak_19534 | 9.01262  | SCAF4_ENSG00000156304                                |
| 21 | 33244924 | 33246453 | KD2-H4K8ac_peak_19535 | 15.57998 | HUNK_ENSG00000142149                                 |
| 21 | 33319112 | 33319381 | KD2-H4K8ac_peak_19536 | 7.47462  |                                                      |
| 21 | 33507059 | 33507310 | KD2-H4K8ac_peak_19537 | 6.00243  |                                                      |
| 21 | 33507989 | 33508264 | KD2-H4K8ac_peak_19538 | 7.63551  |                                                      |
| 21 | 33651963 | 33652188 | KD2-H4K8ac_peak_19539 | 4.01115  | MIS18A_ENSG00000159055                               |
| 21 | 33765034 | 33765258 | KD2-H4K8ac_peak_19540 | 11.05467 | URB1_ENSG00000142207;C21orf119_ENSG00000256073       |
| 21 | 33765495 | 33766041 | KD2-H4K8ac_peak_19541 | 9.89126  | URB1_ENSG00000142207;C21orf119_ENSG00000256073       |
| 21 | 33783787 | 33784224 | KD2-H4K8ac_peak_19542 | 11.09936 | EVA1C_ENSG00000166979                                |
| 21 | 33784422 | 33784639 | KD2-H4K8ac_peak_19543 | 5.13615  | EVA1C_ENSG00000166979                                |
| 21 | 33941959 | 33942157 | KD2-H4K8ac_peak_19544 | 5.53033  |                                                      |
| 21 | 33984475 | 33985830 | KD2-H4K8ac_peak_19545 | 21.52958 | AP000275.65_ENSG00000265590;C21orf59_ENSG00000159079 |
| 21 | 33986168 | 33986491 | KD2-H4K8ac_peak_19546 | 6.42097  | C21orf59_ENSG00000159079                             |
| 21 | 34099765 | 34100251 | KD2-H4K8ac_peak_19547 | 6.99815  | SYNJ1_ENSG00000159082;PAXBP1-AS1_ENSG00000238197     |
| 21 | 34100458 | 34100739 | KD2-H4K8ac_peak_19548 | 19.72117 | SYNJ1_ENSG00000159082;PAXBP1-AS1_ENSG00000238197     |

|    |          |          |                       |          |                                                                                                |
|----|----------|----------|-----------------------|----------|------------------------------------------------------------------------------------------------|
| 21 | 34143319 | 34143998 | KD2-H4K8ac_peak_19549 | 10.0692  | PAXBP1_ENSG00000159086;C21orf49_ENSG00000205930                                                |
| 21 | 34602288 | 34602623 | KD2-H4K8ac_peak_19550 | 9.36516  | IFNAR2_ENSG00000159110                                                                         |
| 21 | 34638723 | 34638948 | KD2-H4K8ac_peak_19551 | 11.05467 | IL10RB-AS1_ENSG00000223799;IL10RB_ENSG00000243646                                              |
| 21 | 34696703 | 34697060 | KD2-H4K8ac_peak_19552 | 9.63487  | IFNAR1_ENSG00000142166                                                                         |
| 21 | 34697382 | 34697712 | KD2-H4K8ac_peak_19553 | 5.01002  | IFNAR1_ENSG00000142166                                                                         |
| 21 | 34775430 | 34776725 | KD2-H4K8ac_peak_19554 | 10.43145 | IFNGR2_ENSG00000159128                                                                         |
| 21 | 34851876 | 34852109 | KD2-H4K8ac_peak_19555 | 5.54647  | TMEM50B_ENSG00000142188                                                                        |
| 21 | 34852665 | 34852861 | KD2-H4K8ac_peak_19556 | 6.66692  | TMEM50B_ENSG00000142188                                                                        |
| 21 | 34863649 | 34864463 | KD2-H4K8ac_peak_19557 | 15.22643 | DNAJC28_ENSG00000177692                                                                        |
| 21 | 34961287 | 34961540 | KD2-H4K8ac_peak_19558 | 6.72334  | DONSON_ENSG00000159147                                                                         |
| 21 | 35014875 | 35015504 | KD2-H4K8ac_peak_19559 | 10.05606 | CRYZL1_ENSG00000205758;ITSN1_ENSG00000205726                                                   |
| 21 | 35287678 | 35287971 | KD2-H4K8ac_peak_19560 | 10.65724 | ATP5O_ENSG00000241837;LINC00649_ENSG00000237945                                                |
| 21 | 35288421 | 35288684 | KD2-H4K8ac_peak_19561 | 5.4919   | ATP5O_ENSG00000241837;LINC00649_ENSG00000237945                                                |
| 21 | 35401904 | 35402339 | KD2-H4K8ac_peak_19562 | 6.56926  |                                                                                                |
| 21 | 35444872 | 35445586 | KD2-H4K8ac_peak_19563 | 40.814   | MRPS6_ENSG00000243927;SLC5A3_ENSG00000272962;SLC5A3_ENSG00000198743;AP000320.7_ENSG00000272657 |
| 21 | 35576756 | 35577055 | KD2-H4K8ac_peak_19564 | 7.12754  | AP000318.2_ENSG00000214955                                                                     |
| 21 | 35577343 | 35577591 | KD2-H4K8ac_peak_19565 | 10.21502 | AP000318.2_ENSG00000214955                                                                     |
| 21 | 35747056 | 35747623 | KD2-H4K8ac_peak_19566 | 5.94405  | AP000320.6_ENSG00000225555;SMIM11_ENSG00000205670                                              |
| 21 | 35986998 | 35987520 | KD2-H4K8ac_peak_19567 | 14.15075 | RCAN1_ENSG00000159200                                                                          |
| 21 | 37432110 | 37433181 | KD2-H4K8ac_peak_19568 | 7.76329  | AP000688.11_ENSG00000236677                                                                    |
| 21 | 37442311 | 37442685 | KD2-H4K8ac_peak_19569 | 13.21979 | CBR1_ENSG00000159228                                                                           |
| 21 | 37485387 | 37485817 | KD2-H4K8ac_peak_19570 | 4.86324  |                                                                                                |
| 21 | 37501985 | 37502216 | KD2-H4K8ac_peak_19571 | 6.40683  | MEMO1P1_ENSG00000226054                                                                        |
| 21 | 37502469 | 37502994 | KD2-H4K8ac_peak_19572 | 8.1331   | MEMO1P1_ENSG00000226054                                                                        |
| 21 | 37507317 | 37508019 | KD2-H4K8ac_peak_19573 | 6.99815  | CBR3_ENSG00000159231                                                                           |
| 21 | 37529269 | 37529584 | KD2-H4K8ac_peak_19574 | 5.82799  | CBR3-AS1_ENSG00000236830;DOPEY2_ENSG00000142197                                                |
| 21 | 37632679 | 37632906 | KD2-H4K8ac_peak_19575 | 5.16439  |                                                                                                |
| 21 | 37691558 | 37692323 | KD2-H4K8ac_peak_19576 | 11.03331 | AP000692.10_ENSG00000273199;MORC3_ENSG00000159256                                              |
| 21 | 37692616 | 37693166 | KD2-H4K8ac_peak_19577 | 10.96455 | AP000692.10_ENSG00000273199;MORC3_ENSG00000159256                                              |
| 21 | 37694662 | 37695059 | KD2-H4K8ac_peak_19578 | 7.05877  |                                                                                                |
| 21 | 37757724 | 37758183 | KD2-H4K8ac_peak_19579 | 10.88859 | CHAF1B_ENSG00000159259                                                                         |
| 21 | 37833344 | 37833619 | KD2-H4K8ac_peak_19580 | 4.19473  |                                                                                                |
| 21 | 38120294 | 38120646 | KD2-H4K8ac_peak_19581 | 4.44527  |                                                                                                |
| 21 | 38338231 | 38338934 | KD2-H4K8ac_peak_19582 | 17.8868  | AP000704.5_ENSG00000224790                                                                     |
| 21 | 38339225 | 38339713 | KD2-H4K8ac_peak_19583 | 14.45402 | AP000704.5_ENSG00000224790                                                                     |
| 21 | 38361725 | 38362941 | KD2-H4K8ac_peak_19584 | 13.70753 | HLCS_ENSG00000159267                                                                           |
| 21 | 38381978 | 38382269 | KD2-H4K8ac_peak_19585 | 10.05606 |                                                                                                |
| 21 | 38382613 | 38382812 | KD2-H4K8ac_peak_19586 | 5.557    |                                                                                                |
| 21 | 38416290 | 38416536 | KD2-H4K8ac_peak_19587 | 7.0983   |                                                                                                |
| 21 | 38444825 | 38445309 | KD2-H4K8ac_peak_19588 | 11.04256 | PIGP_ENSG00000185808;TTC3_ENSG00000182670                                                      |
| 21 | 38445626 | 38446082 | KD2-H4K8ac_peak_19589 | 7.18615  | PIGP_ENSG00000185808;TTC3_ENSG00000182670                                                      |
| 21 | 38592709 | 38593501 | KD2-H4K8ac_peak_19590 | 5.26288  | AP001432.14_ENSG00000242553                                                                    |
| 21 | 38593788 | 38594097 | KD2-H4K8ac_peak_19591 | 5.20998  | AP001432.14_ENSG00000242553                                                                    |
| 21 | 38640099 | 38640555 | KD2-H4K8ac_peak_19592 | 9.57101  | DSCR3_ENSG00000157538;AP001412.1_ENSG00000272948                                               |
| 21 | 38738154 | 38738571 | KD2-H4K8ac_peak_19593 | 18.54875 | AP001437.1_ENSG00000273210;DYRK1A_ENSG00000157540                                              |
| 21 | 38739159 | 38740527 | KD2-H4K8ac_peak_19594 | 13.80019 | AP001437.1_ENSG00000273210                                                                     |

|    |          |          |                       |          |                                                                          |
|----|----------|----------|-----------------------|----------|--------------------------------------------------------------------------|
| 21 | 38935631 | 38936148 | KD2-H4K8ac_peak_19595 | 15.20126 |                                                                          |
| 21 | 38936427 | 38936639 | KD2-H4K8ac_peak_19596 | 7.51054  |                                                                          |
| 21 | 38936934 | 38937239 | KD2-H4K8ac_peak_19597 | 7.67504  |                                                                          |
| 21 | 40177943 | 40178243 | KD2-H4K8ac_peak_19598 | 11.92978 | ETS2_ENSG00000157557                                                     |
| 21 | 40684993 | 40686384 | KD2-H4K8ac_peak_19599 | 18.91876 | BRWD1-IT2_ENSG00000255568                                                |
| 21 | 40720298 | 40720973 | KD2-H4K8ac_peak_19600 | 28.21903 | HMG11_ENSG00000205581                                                    |
| 21 | 40721548 | 40721845 | KD2-H4K8ac_peak_19601 | 9.18237  | HMG11_ENSG00000205581                                                    |
| 21 | 40758211 | 40758481 | KD2-H4K8ac_peak_19602 | 9.72244  |                                                                          |
| 21 | 40817327 | 40817574 | KD2-H4K8ac_peak_19603 | 8.30974  | LCA5L_ENSG00000157578;SH3BGR_ENSG00000185437                             |
| 21 | 40817835 | 40818051 | KD2-H4K8ac_peak_19604 | 8.16133  | LCA5L_ENSG00000157578;SH3BGR_ENSG00000185437                             |
| 21 | 40984685 | 40985030 | KD2-H4K8ac_peak_19605 | 6.25869  | C21orf88_ENSG00000184809                                                 |
| 21 | 41032536 | 41032801 | KD2-H4K8ac_peak_19606 | 5.26591  |                                                                          |
| 21 | 41045065 | 41045368 | KD2-H4K8ac_peak_19607 | 7.27716  |                                                                          |
| 21 | 41047366 | 41047796 | KD2-H4K8ac_peak_19608 | 9.1707   |                                                                          |
| 21 | 41048579 | 41048986 | KD2-H4K8ac_peak_19609 | 11.92209 |                                                                          |
| 21 | 41549859 | 41550054 | KD2-H4K8ac_peak_19610 | 5.15777  |                                                                          |
| 21 | 42213522 | 42213840 | KD2-H4K8ac_peak_19611 | 6.07178  |                                                                          |
| 21 | 43298717 | 43298941 | KD2-H4K8ac_peak_19612 | 9.19305  | PRDM15_ENSG00000141956;AP001619.2_ENSG00000227698                        |
| 21 | 43299403 | 43300051 | KD2-H4K8ac_peak_19613 | 24.48793 | PRDM15_ENSG00000141956                                                   |
| 21 | 43373348 | 43374616 | KD2-H4K8ac_peak_19614 | 8.83582  | C2CD2_ENSG00000157617                                                    |
| 21 | 43430293 | 43431237 | KD2-H4K8ac_peak_19615 | 13.80019 | ZBTB21_ENSG00000173276;ZNF295-AS1_ENSG00000237232                        |
| 21 | 43576913 | 43577149 | KD2-H4K8ac_peak_19616 | 5.45396  |                                                                          |
| 21 | 43640598 | 43640815 | KD2-H4K8ac_peak_19617 | 4.86324  | RNA5SP492_ENSG00000223262                                                |
| 21 | 43654611 | 43655493 | KD2-H4K8ac_peak_19618 | 5.9696   |                                                                          |
| 21 | 43916729 | 43917053 | KD2-H4K8ac_peak_19619 | 11.86082 | RSPH1_ENSG00000160188;SLC37A1_ENSG00000160190;AP001625.4_ENSG00000239930 |
| 21 | 43933599 | 43934346 | KD2-H4K8ac_peak_19620 | 9.15069  |                                                                          |
| 21 | 43991077 | 43991472 | KD2-H4K8ac_peak_19621 | 4.42765  |                                                                          |
| 21 | 44012811 | 44013485 | KD2-H4K8ac_peak_19622 | 5.30799  |                                                                          |
| 21 | 44034917 | 44035150 | KD2-H4K8ac_peak_19623 | 6.66692  | AP001626.1_ENSG00000225431                                               |
| 21 | 44072909 | 44073550 | KD2-H4K8ac_peak_19624 | 14.69247 | PDE9A_ENSG00000160191                                                    |
| 21 | 44073854 | 44074508 | KD2-H4K8ac_peak_19625 | 5.38581  | PDE9A_ENSG00000160191                                                    |
| 21 | 44201446 | 44201988 | KD2-H4K8ac_peak_19626 | 9.15329  | AP001628.7_ENSG00000233754                                               |
| 21 | 44202205 | 44202729 | KD2-H4K8ac_peak_19627 | 12.42547 | AP001628.7_ENSG00000233754                                               |
| 21 | 44298924 | 44299532 | KD2-H4K8ac_peak_19628 | 17.43705 | WDR4_ENSG00000160193;NDUFV3_ENSG00000160194                              |
| 21 | 44299797 | 44300234 | KD2-H4K8ac_peak_19629 | 12.26331 | WDR4_ENSG00000160193;NDUFV3_ENSG00000160194                              |
| 21 | 44312917 | 44313190 | KD2-H4K8ac_peak_19630 | 8.55271  |                                                                          |
| 21 | 44313481 | 44313832 | KD2-H4K8ac_peak_19631 | 7.146    |                                                                          |
| 21 | 44393525 | 44394277 | KD2-H4K8ac_peak_19632 | 21.2844  | PKNOX1_ENSG00000160199                                                   |
| 21 | 44394787 | 44395056 | KD2-H4K8ac_peak_19633 | 13.80019 | PKNOX1_ENSG00000160199                                                   |
| 21 | 44395307 | 44395530 | KD2-H4K8ac_peak_19634 | 11.03331 | PKNOX1_ENSG00000160199                                                   |
| 21 | 44494755 | 44495154 | KD2-H4K8ac_peak_19635 | 5.98692  |                                                                          |
| 21 | 44495431 | 44495908 | KD2-H4K8ac_peak_19636 | 11.28831 |                                                                          |
| 21 | 44496446 | 44496854 | KD2-H4K8ac_peak_19637 | 7.36799  | CBS_ENSG00000160200                                                      |
| 21 | 44527222 | 44527644 | KD2-H4K8ac_peak_19638 | 11.3394  | U2AF1_ENSG00000160201                                                    |
| 21 | 44527875 | 44528120 | KD2-H4K8ac_peak_19639 | 11.09936 | U2AF1_ENSG00000160201                                                    |
| 21 | 44537213 | 44537439 | KD2-H4K8ac_peak_19640 | 7.27716  |                                                                          |

|    |          |          |                       |          |                                                       |
|----|----------|----------|-----------------------|----------|-------------------------------------------------------|
| 21 | 44598420 | 44599138 | KD2-H4K8ac_peak_19641 | 6.60096  |                                                       |
| 21 | 44777937 | 44778129 | KD2-H4K8ac_peak_19642 | 4.54838  |                                                       |
| 21 | 44779863 | 44780104 | KD2-H4K8ac_peak_19643 | 5.69023  |                                                       |
| 21 | 44780333 | 44780559 | KD2-H4K8ac_peak_19644 | 7.99241  |                                                       |
| 21 | 44781563 | 44782062 | KD2-H4K8ac_peak_19645 | 6.65673  | AP001046.5_ENSG00000237989                            |
| 21 | 44782865 | 44783078 | KD2-H4K8ac_peak_19646 | 8.36514  | AP001046.5_ENSG00000237989;AP001046.6_ENSG00000225637 |
| 21 | 44783370 | 44783665 | KD2-H4K8ac_peak_19647 | 6.66692  | AP001046.6_ENSG00000225637                            |
| 21 | 44787069 | 44787523 | KD2-H4K8ac_peak_19648 | 9.76863  |                                                       |
| 21 | 44803575 | 44803826 | KD2-H4K8ac_peak_19649 | 8.53581  |                                                       |
| 21 | 44847439 | 44847692 | KD2-H4K8ac_peak_19650 | 8.16906  | SIK1_ENSG00000142178                                  |
| 21 | 44870757 | 44871027 | KD2-H4K8ac_peak_19651 | 10.7186  |                                                       |
| 21 | 44871543 | 44871798 | KD2-H4K8ac_peak_19652 | 7.36799  |                                                       |
| 21 | 44906114 | 44906494 | KD2-H4K8ac_peak_19653 | 4.98072  |                                                       |
| 21 | 44936431 | 44936720 | KD2-H4K8ac_peak_19654 | 4.54006  |                                                       |
| 21 | 44938237 | 44938458 | KD2-H4K8ac_peak_19655 | 8.94469  |                                                       |
| 21 | 45025976 | 45026379 | KD2-H4K8ac_peak_19656 | 7.70289  |                                                       |
| 21 | 45078563 | 45079200 | KD2-H4K8ac_peak_19657 | 7.28628  | HSF2BP_ENSG00000160207;RRP1B_ENSG00000160208          |
| 21 | 45138174 | 45138722 | KD2-H4K8ac_peak_19658 | 14.48084 | PDXK_ENSG00000160209                                  |
| 21 | 45139051 | 45139248 | KD2-H4K8ac_peak_19659 | 6.65673  | PDXK_ENSG00000160209                                  |
| 21 | 45147932 | 45148924 | KD2-H4K8ac_peak_19660 | 13.50024 |                                                       |
| 21 | 45195999 | 45196708 | KD2-H4K8ac_peak_19661 | 10.43145 | CSTB_ENSG00000160213                                  |
| 21 | 45208818 | 45209067 | KD2-H4K8ac_peak_19662 | 5.9696   | RRP1_ENSG00000160214                                  |
| 21 | 45209508 | 45209756 | KD2-H4K8ac_peak_19663 | 8.95692  | RRP1_ENSG00000160214                                  |
| 21 | 45284189 | 45284681 | KD2-H4K8ac_peak_19664 | 20.15307 | AGPAT3_ENSG00000160216                                |
| 21 | 45284980 | 45285884 | KD2-H4K8ac_peak_19665 | 17.06312 | AGPAT3_ENSG00000160216                                |
| 21 | 45431735 | 45432032 | KD2-H4K8ac_peak_19666 | 12.23    | TRAPPC10_ENSG00000160218                              |
| 21 | 45432271 | 45432483 | KD2-H4K8ac_peak_19667 | 7.36799  | TRAPPC10_ENSG00000160218                              |
| 21 | 45553040 | 45553319 | KD2-H4K8ac_peak_19668 | 15.81711 | C21orf33_ENSG00000160221                              |
| 21 | 45553578 | 45553911 | KD2-H4K8ac_peak_19669 | 10.43145 | C21orf33_ENSG00000160221                              |
| 21 | 45719470 | 45720871 | KD2-H4K8ac_peak_19670 | 15.52424 | PFKL_ENSG00000141959                                  |
| 21 | 45759395 | 45759866 | KD2-H4K8ac_peak_19671 | 10.53377 | C21orf2_ENSG00000160226;AP001062.9_ENSG00000232969    |
| 21 | 45857519 | 45858709 | KD2-H4K8ac_peak_19672 | 14.8083  | snoZ6_ENSG00000266692;snoZ6_ENSG00000264452           |
| 21 | 45870250 | 45870493 | KD2-H4K8ac_peak_19673 | 7.13615  |                                                       |
| 21 | 45906260 | 45906467 | KD2-H4K8ac_peak_19674 | 7.87794  | AP001065.15_ENSG00000228709                           |
| 21 | 45936777 | 45936984 | KD2-H4K8ac_peak_19675 | 7.69287  | C21orf90_ENSG00000182912                              |
| 21 | 46185924 | 46186151 | KD2-H4K8ac_peak_19676 | 6.9556   |                                                       |
| 21 | 46237900 | 46238514 | KD2-H4K8ac_peak_19677 | 18.37277 | SUMO3_ENSG00000184900                                 |
| 21 | 46265876 | 46266085 | KD2-H4K8ac_peak_19678 | 9.68448  |                                                       |
| 21 | 46293011 | 46293572 | KD2-H4K8ac_peak_19679 | 10.0692  | PTTG1IP_ENSG00000183255                               |
| 21 | 46294011 | 46294830 | KD2-H4K8ac_peak_19680 | 7.76329  | PTTG1IP_ENSG00000183255                               |
| 21 | 46359357 | 46360340 | KD2-H4K8ac_peak_19681 | 17.16047 | C21orf67_ENSG00000183250;FAM207A_ENSG00000160256      |
| 21 | 46386705 | 46387295 | KD2-H4K8ac_peak_19682 | 11.50346 |                                                       |
| 21 | 46400314 | 46400549 | KD2-H4K8ac_peak_19683 | 6.16883  |                                                       |
| 21 | 46400813 | 46401133 | KD2-H4K8ac_peak_19684 | 5.70596  |                                                       |
| 21 | 46404996 | 46405636 | KD2-H4K8ac_peak_19685 | 10.7186  |                                                       |
| 21 | 46406628 | 46407389 | KD2-H4K8ac_peak_19686 | 7.69287  |                                                       |



|    |          |          |                       |          |                                                    |
|----|----------|----------|-----------------------|----------|----------------------------------------------------|
| 21 | 46408936 | 46409155 | KD2-H4K8ac_peak_19687 | 5.54647  |                                                    |
| 21 | 46409983 | 46410353 | KD2-H4K8ac_peak_19688 | 8.79106  |                                                    |
| 21 | 46438245 | 46439397 | KD2-H4K8ac_peak_19689 | 8.10216  |                                                    |
| 21 | 46494050 | 46494347 | KD2-H4K8ac_peak_19690 | 14.8083  | SSR4P1_ENSG00000235374;ADARB1_ENSG00000197381      |
| 21 | 46494779 | 46495226 | KD2-H4K8ac_peak_19691 | 8.59579  | SSR4P1_ENSG00000235374                             |
| 21 | 46513134 | 46513408 | KD2-H4K8ac_peak_19692 | 6.05809  |                                                    |
| 21 | 46573350 | 46573836 | KD2-H4K8ac_peak_19693 | 8.41122  |                                                    |
| 21 | 46575170 | 46575378 | KD2-H4K8ac_peak_19694 | 7.22457  |                                                    |
| 21 | 46578183 | 46578781 | KD2-H4K8ac_peak_19695 | 12.85889 |                                                    |
| 21 | 46623064 | 46623292 | KD2-H4K8ac_peak_19696 | 10.29344 |                                                    |
| 21 | 46668806 | 46669028 | KD2-H4K8ac_peak_19697 | 5.57044  |                                                    |
| 21 | 46708002 | 46708626 | KD2-H4K8ac_peak_19698 | 9.72244  | POFUT2_ENSG00000186866;BX322557.10_ENSG00000215447 |
| 21 | 46712530 | 46712801 | KD2-H4K8ac_peak_19699 | 5.82799  | LINC00205_ENSG00000223768                          |
| 21 | 46769745 | 46770071 | KD2-H4K8ac_peak_19700 | 3.91903  |                                                    |
| 21 | 46772643 | 46773006 | KD2-H4K8ac_peak_19701 | 9.34989  |                                                    |
| 21 | 46779317 | 46779916 | KD2-H4K8ac_peak_19702 | 12.06346 |                                                    |
| 21 | 46780280 | 46780692 | KD2-H4K8ac_peak_19703 | 4.73543  |                                                    |
| 21 | 46781012 | 46781896 | KD2-H4K8ac_peak_19704 | 9.73431  |                                                    |
| 21 | 46824387 | 46824599 | KD2-H4K8ac_peak_19705 | 6.66692  | COL18A1_ENSG00000182871                            |
| 21 | 46825397 | 46825597 | KD2-H4K8ac_peak_19706 | 5.94347  | COL18A1_ENSG00000182871                            |
| 21 | 46825917 | 46826238 | KD2-H4K8ac_peak_19707 | 7.07117  | COL18A1_ENSG00000182871                            |
| 21 | 46851523 | 46851818 | KD2-H4K8ac_peak_19708 | 7.95934  |                                                    |
| 21 | 46885891 | 46886369 | KD2-H4K8ac_peak_19709 | 4.35346  |                                                    |
| 21 | 46887147 | 46887454 | KD2-H4K8ac_peak_19710 | 7.40111  |                                                    |
| 21 | 46897763 | 46898126 | KD2-H4K8ac_peak_19711 | 12.30509 |                                                    |
| 21 | 46961411 | 46961929 | KD2-H4K8ac_peak_19712 | 9.1707   |                                                    |
| 21 | 46962785 | 46963390 | KD2-H4K8ac_peak_19713 | 14.09907 | SLC19A1_ENSG00000173638                            |
| 21 | 46974407 | 46974920 | KD2-H4K8ac_peak_19714 | 8.21084  |                                                    |
| 21 | 46975580 | 46976044 | KD2-H4K8ac_peak_19715 | 14.15075 |                                                    |
| 21 | 46991856 | 46992434 | KD2-H4K8ac_peak_19716 | 10.16666 |                                                    |
| 21 | 47035807 | 47036647 | KD2-H4K8ac_peak_19717 | 9.1994   |                                                    |
| 21 | 47058855 | 47059320 | KD2-H4K8ac_peak_19718 | 7.67504  |                                                    |
| 21 | 47059731 | 47060127 | KD2-H4K8ac_peak_19719 | 9.20193  |                                                    |
| 21 | 47060325 | 47061152 | KD2-H4K8ac_peak_19720 | 9.16531  |                                                    |
| 21 | 47061372 | 47061675 | KD2-H4K8ac_peak_19721 | 3.90565  |                                                    |
| 21 | 47062070 | 47062708 | KD2-H4K8ac_peak_19722 | 11.16154 | PCBP3_ENSG00000183570                              |
| 21 | 47123362 | 47124490 | KD2-H4K8ac_peak_19723 | 12.82393 |                                                    |
| 21 | 47124910 | 47125555 | KD2-H4K8ac_peak_19724 | 11.05467 |                                                    |
| 21 | 47126027 | 47126617 | KD2-H4K8ac_peak_19725 | 6.36375  |                                                    |
| 21 | 47128724 | 47128926 | KD2-H4K8ac_peak_19726 | 5.58324  |                                                    |
| 21 | 47145409 | 47145686 | KD2-H4K8ac_peak_19727 | 9.16531  |                                                    |
| 21 | 47146429 | 47146712 | KD2-H4K8ac_peak_19728 | 5.08628  |                                                    |
| 21 | 47167360 | 47167668 | KD2-H4K8ac_peak_19729 | 8.85813  |                                                    |
| 21 | 47186333 | 47186650 | KD2-H4K8ac_peak_19730 | 5.14125  |                                                    |
| 21 | 47240029 | 47240263 | KD2-H4K8ac_peak_19731 | 5.75757  |                                                    |
| 21 | 47281066 | 47281340 | KD2-H4K8ac_peak_19732 | 8.98477  |                                                    |

|    |          |          |                       |          |                                                       |
|----|----------|----------|-----------------------|----------|-------------------------------------------------------|
| 21 | 47307336 | 47307596 | KD2-H4K8ac_peak_19733 | 6.92624  |                                                       |
| 21 | 47314371 | 47314572 | KD2-H4K8ac_peak_19734 | 7.27716  |                                                       |
| 21 | 47390233 | 47391685 | KD2-H4K8ac_peak_19735 | 23.59427 |                                                       |
| 21 | 47392124 | 47394796 | KD2-H4K8ac_peak_19736 | 17.55491 |                                                       |
| 21 | 47498701 | 47499356 | KD2-H4K8ac_peak_19737 | 8.99803  |                                                       |
| 21 | 47499905 | 47500414 | KD2-H4K8ac_peak_19738 | 13.47439 |                                                       |
| 21 | 47517302 | 47518853 | KD2-H4K8ac_peak_19739 | 12.14909 | AP001471.1_ENSG00000227438;COL6A2_ENSG00000142173     |
| 21 | 47548602 | 47549154 | KD2-H4K8ac_peak_19740 | 5.34636  |                                                       |
| 21 | 47573545 | 47573909 | KD2-H4K8ac_peak_19741 | 5.13615  |                                                       |
| 21 | 47604709 | 47604993 | KD2-H4K8ac_peak_19742 | 6.40683  | SPATC1L_ENSG00000160284;AP001468.58_ENSG00000228404   |
| 21 | 47614354 | 47614936 | KD2-H4K8ac_peak_19743 | 9.34195  | AP001468.1_ENSG00000235878                            |
| 21 | 47649151 | 47649702 | KD2-H4K8ac_peak_19744 | 11.05467 | LSS_ENSG00000160285;MCM3AP-AS1_ENSG00000215424        |
| 21 | 47705947 | 47706404 | KD2-H4K8ac_peak_19745 | 6.98244  | MCM3AP_ENSG00000160294;YBEY_ENSG00000182362           |
| 21 | 47714922 | 47715511 | KD2-H4K8ac_peak_19746 | 10.05606 |                                                       |
| 21 | 47743143 | 47743718 | KD2-H4K8ac_peak_19747 | 8.55271  | PCNT_ENSG00000160299;C21orf58_ENSG00000160298         |
| 21 | 47744042 | 47744389 | KD2-H4K8ac_peak_19748 | 31.533   | PCNT_ENSG00000160299;C21orf58_ENSG00000160298         |
| 21 | 47744665 | 47745252 | KD2-H4K8ac_peak_19749 | 14.48084 | PCNT_ENSG00000160299;C21orf58_ENSG00000160298         |
| 21 | 47878133 | 47878577 | KD2-H4K8ac_peak_19750 | 11.50346 | DIP2A_ENSG00000160305                                 |
| 21 | 47878895 | 47879135 | KD2-H4K8ac_peak_19751 | 10.21366 | DIP2A_ENSG00000160305                                 |
| 21 | 48054298 | 48054731 | KD2-H4K8ac_peak_19752 | 6.85193  | PRMT2_ENSG00000160310                                 |
| 21 | 48055122 | 48055869 | KD2-H4K8ac_peak_19753 | 19.43192 | PRMT2_ENSG00000160310                                 |
| 21 | 48087674 | 48087933 | KD2-H4K8ac_peak_19754 | 7.07117  |                                                       |
| 22 | 17601760 | 17602070 | KD2-H4K8ac_peak_19755 | 11.39383 | CECR6_ENSG00000183307;AC006946.15_ENSG00000235478     |
| 22 | 17602545 | 17602901 | KD2-H4K8ac_peak_19756 | 11.24702 | CECR6_ENSG00000183307;AC006946.15_ENSG00000235478     |
| 22 | 17639675 | 17640055 | KD2-H4K8ac_peak_19757 | 8.30974  | CECR5-AS1_ENSG00000185837                             |
| 22 | 17640290 | 17640686 | KD2-H4K8ac_peak_19758 | 10.21366 | CECR5-AS1_ENSG00000185837                             |
| 22 | 17652176 | 17653559 | KD2-H4K8ac_peak_19759 | 10.7186  |                                                       |
| 22 | 17679875 | 17680281 | KD2-H4K8ac_peak_19760 | 8.28994  |                                                       |
| 22 | 17739079 | 17739470 | KD2-H4K8ac_peak_19761 | 4.80593  |                                                       |
| 22 | 17745003 | 17745329 | KD2-H4K8ac_peak_19762 | 7.47462  |                                                       |
| 22 | 18009046 | 18009276 | KD2-H4K8ac_peak_19763 | 7.76104  |                                                       |
| 22 | 18061220 | 18061433 | KD2-H4K8ac_peak_19764 | 5.88845  |                                                       |
| 22 | 18111120 | 18111475 | KD2-H4K8ac_peak_19765 | 11.89502 | ATP6V1E1_ENSG00000131100;BCL2L13_ENSG00000099968      |
| 22 | 18111773 | 18112081 | KD2-H4K8ac_peak_19766 | 7.01964  | ATP6V1E1_ENSG00000131100;BCL2L13_ENSG00000099968      |
| 22 | 18121056 | 18121882 | KD2-H4K8ac_peak_19767 | 9.36516  |                                                       |
| 22 | 18256875 | 18257924 | KD2-H4K8ac_peak_19768 | 12.66412 | BID_ENSG00000015475                                   |
| 22 | 18483979 | 18484216 | KD2-H4K8ac_peak_19769 | 11.2938  |                                                       |
| 22 | 18484816 | 18485339 | KD2-H4K8ac_peak_19770 | 6.65673  |                                                       |
| 22 | 18560987 | 18561257 | KD2-H4K8ac_peak_19771 | 5.59859  | XXbac-B476C20.9_ENSG00000225335;PEX26_ENSG00000215193 |
| 22 | 18592938 | 18593697 | KD2-H4K8ac_peak_19772 | 5.72327  | TUBA8_ENSG00000183785                                 |
| 22 | 18632280 | 18632554 | KD2-H4K8ac_peak_19773 | 4.77079  | USP18_ENSG00000184979                                 |
| 22 | 18893293 | 18893641 | KD2-H4K8ac_peak_19774 | 10.29842 | DGCR6_ENSG00000183628                                 |
| 22 | 18893909 | 18894135 | KD2-H4K8ac_peak_19775 | 5.75757  | DGCR6_ENSG00000183628                                 |
| 22 | 18904215 | 18904440 | KD2-H4K8ac_peak_19776 | 5.14125  |                                                       |
| 22 | 18910232 | 18910435 | KD2-H4K8ac_peak_19777 | 4.54006  |                                                       |
| 22 | 18923528 | 18923755 | KD2-H4K8ac_peak_19778 | 8.02571  | PRODH_ENSG00000100033                                 |

|    |          |          |                       |          |                                                                          |
|----|----------|----------|-----------------------|----------|--------------------------------------------------------------------------|
| 22 | 18955472 | 18956000 | KD2-H4K8ac_peak_19779 | 5.9696   |                                                                          |
| 22 | 18957212 | 18958956 | KD2-H4K8ac_peak_19780 | 14.8083  | DGCR5_ENSG00000237517                                                    |
| 22 | 19109653 | 19109899 | KD2-H4K8ac_peak_19781 | 15.22643 | DGCR2_ENSG00000070413;AC004471.9_ENSG00000223461                         |
| 22 | 19110322 | 19110720 | KD2-H4K8ac_peak_19782 | 6.99815  | DGCR2_ENSG00000070413                                                    |
| 22 | 19158537 | 19159665 | KD2-H4K8ac_peak_19783 | 27.59    | AC004463.6_ENSG00000260924                                               |
| 22 | 19165949 | 19166230 | KD2-H4K8ac_peak_19784 | 11.3394  | SLC25A1_ENSG00000100075                                                  |
| 22 | 19278638 | 19279205 | KD2-H4K8ac_peak_19785 | 9.8758   | CLTCL1_ENSG00000070371                                                   |
| 22 | 19279478 | 19279688 | KD2-H4K8ac_peak_19786 | 12.26331 | CLTCL1_ENSG00000070371                                                   |
| 22 | 19418849 | 19419097 | KD2-H4K8ac_peak_19787 | 7.96322  | MRPL40_ENSG00000185608                                                   |
| 22 | 19419319 | 19419826 | KD2-H4K8ac_peak_19788 | 15.69572 | MRPL40_ENSG00000185608                                                   |
| 22 | 19434744 | 19435180 | KD2-H4K8ac_peak_19789 | 18.94636 | HIRA_ENSG00000100084;C22orf39_ENSG00000242259;AC000068.5_ENSG00000185065 |
| 22 | 19435479 | 19435783 | KD2-H4K8ac_peak_19790 | 7.76329  | HIRA_ENSG00000100084;C22orf39_ENSG00000242259;AC000068.5_ENSG00000185065 |
| 22 | 19683829 | 19684048 | KD2-H4K8ac_peak_19791 | 9.61895  |                                                                          |
| 22 | 19701018 | 19701244 | KD2-H4K8ac_peak_19792 | 6.25869  | SEPT5_ENSG00000184702                                                    |
| 22 | 19701471 | 19701885 | KD2-H4K8ac_peak_19793 | 14.66631 | SEPT5_ENSG00000184702                                                    |
| 22 | 19702091 | 19702306 | KD2-H4K8ac_peak_19794 | 6.76298  | SEPT5_ENSG00000184702                                                    |
| 22 | 19705418 | 19705617 | KD2-H4K8ac_peak_19795 | 8.4716   |                                                                          |
| 22 | 19705997 | 19706250 | KD2-H4K8ac_peak_19796 | 6.04107  |                                                                          |
| 22 | 19732853 | 19733436 | KD2-H4K8ac_peak_19797 | 5.08628  |                                                                          |
| 22 | 19799559 | 19800193 | KD2-H4K8ac_peak_19798 | 7.146    |                                                                          |
| 22 | 19832053 | 19832379 | KD2-H4K8ac_peak_19799 | 10.54933 |                                                                          |
| 22 | 19842660 | 19843282 | KD2-H4K8ac_peak_19800 | 14.59156 | GNB1L_ENSG00000185838;C22orf29_ENSG00000215012                           |
| 22 | 19878833 | 19879162 | KD2-H4K8ac_peak_19801 | 9.08816  |                                                                          |
| 22 | 19879465 | 19879682 | KD2-H4K8ac_peak_19802 | 11.00004 |                                                                          |
| 22 | 19880000 | 19880703 | KD2-H4K8ac_peak_19803 | 10.77651 |                                                                          |
| 22 | 19883939 | 19884513 | KD2-H4K8ac_peak_19804 | 6.66692  |                                                                          |
| 22 | 19928904 | 19929998 | KD2-H4K8ac_peak_19805 | 18.94636 | TXNRD2_ENSG00000184470;COMT_ENSG00000093010                              |
| 22 | 19930433 | 19930648 | KD2-H4K8ac_peak_19806 | 5.14125  |                                                                          |
| 22 | 19974327 | 19974643 | KD2-H4K8ac_peak_19807 | 5.9696   |                                                                          |
| 22 | 19984514 | 19984840 | KD2-H4K8ac_peak_19808 | 8.55271  |                                                                          |
| 22 | 19985747 | 19986666 | KD2-H4K8ac_peak_19809 | 9.402    |                                                                          |
| 22 | 20004030 | 20004227 | KD2-H4K8ac_peak_19810 | 8.10216  | ARVCF_ENSG00000099889;TANGO2_ENSG00000183597                             |
| 22 | 20008107 | 20008378 | KD2-H4K8ac_peak_19811 | 12.93209 |                                                                          |
| 22 | 20066667 | 20067413 | KD2-H4K8ac_peak_19812 | 5.9696   | DGCR8_ENSG00000128191                                                    |
| 22 | 20067815 | 20068259 | KD2-H4K8ac_peak_19813 | 12.79505 | DGCR8_ENSG00000128191                                                    |
| 22 | 20103961 | 20104205 | KD2-H4K8ac_peak_19814 | 11.43353 | TRMT2A_ENSG00000099899;RANBP1_ENSG00000099901                            |
| 22 | 20105195 | 20105552 | KD2-H4K8ac_peak_19815 | 15.58442 | TRMT2A_ENSG00000099899                                                   |
| 22 | 20118215 | 20118433 | KD2-H4K8ac_peak_19816 | 5.34636  |                                                                          |
| 22 | 20118830 | 20119183 | KD2-H4K8ac_peak_19817 | 12.44942 |                                                                          |
| 22 | 20142126 | 20142909 | KD2-H4K8ac_peak_19818 | 13.44374 |                                                                          |
| 22 | 20143293 | 20143516 | KD2-H4K8ac_peak_19819 | 6.60096  |                                                                          |
| 22 | 20143734 | 20143946 | KD2-H4K8ac_peak_19820 | 5.54647  |                                                                          |
| 22 | 20144809 | 20145464 | KD2-H4K8ac_peak_19821 | 4.67342  |                                                                          |
| 22 | 20194315 | 20194643 | KD2-H4K8ac_peak_19822 | 4.80593  | LINC00896_ENSG00000236499                                                |
| 22 | 20198043 | 20198754 | KD2-H4K8ac_peak_19823 | 8.05667  |                                                                          |
| 22 | 20199178 | 20199933 | KD2-H4K8ac_peak_19824 | 10.63725 |                                                                          |

|    |          |          |                       |          |                                                                       |
|----|----------|----------|-----------------------|----------|-----------------------------------------------------------------------|
| 22 | 20255293 | 20255762 | KD2-H4K8ac_peak_19825 | 8.10216  |                                                                       |
| 22 | 20256062 | 20256772 | KD2-H4K8ac_peak_19826 | 10.78136 |                                                                       |
| 22 | 20307748 | 20308189 | KD2-H4K8ac_peak_19827 | 9.57101  | DGCR6L_ENSG00000128185;XXbac-B444P24.14_ENSG00000273139               |
| 22 | 20747347 | 20748121 | KD2-H4K8ac_peak_19828 | 13.80019 | ZNF74_ENSG00000185252                                                 |
| 22 | 20748508 | 20748830 | KD2-H4K8ac_peak_19829 | 11.05467 | ZNF74_ENSG00000185252                                                 |
| 22 | 20772748 | 20772963 | KD2-H4K8ac_peak_19830 | 6.65673  |                                                                       |
| 22 | 20776263 | 20777651 | KD2-H4K8ac_peak_19831 | 12.82393 |                                                                       |
| 22 | 20791843 | 20792045 | KD2-H4K8ac_peak_19832 | 5.30799  | SCARF2_ENSG00000244486                                                |
| 22 | 20792292 | 20792722 | KD2-H4K8ac_peak_19833 | 13.80019 | SCARF2_ENSG00000244486                                                |
| 22 | 20810866 | 20811407 | KD2-H4K8ac_peak_19834 | 4.86324  |                                                                       |
| 22 | 20849393 | 20849962 | KD2-H4K8ac_peak_19835 | 4.91674  | KLHL22_ENSG00000099910;MED15_ENSG00000099917                          |
| 22 | 20860915 | 20861699 | KD2-H4K8ac_peak_19836 | 7.76329  |                                                                       |
| 22 | 20885777 | 20885970 | KD2-H4K8ac_peak_19837 | 4.57782  |                                                                       |
| 22 | 20886963 | 20887177 | KD2-H4K8ac_peak_19838 | 10.7186  |                                                                       |
| 22 | 20887450 | 20887699 | KD2-H4K8ac_peak_19839 | 6.05809  |                                                                       |
| 22 | 20888609 | 20889091 | KD2-H4K8ac_peak_19840 | 7.09076  |                                                                       |
| 22 | 20890337 | 20890551 | KD2-H4K8ac_peak_19841 | 10.84242 |                                                                       |
| 22 | 20891440 | 20891906 | KD2-H4K8ac_peak_19842 | 8.56219  |                                                                       |
| 22 | 21056521 | 21056909 | KD2-H4K8ac_peak_19843 | 5.835    |                                                                       |
| 22 | 21270473 | 21271378 | KD2-H4K8ac_peak_19844 | 12.06346 | CRKL_ENSG00000099942                                                  |
| 22 | 21271790 | 21271993 | KD2-H4K8ac_peak_19845 | 5.59859  | CRKL_ENSG00000099942                                                  |
| 22 | 21319622 | 21319830 | KD2-H4K8ac_peak_19846 | 4.67342  | AIFM3_ENSG00000183773                                                 |
| 22 | 21336296 | 21337137 | KD2-H4K8ac_peak_19847 | 7.90806  | XXbac-B135H6.18_ENSG00000272829                                       |
| 22 | 21355596 | 21355959 | KD2-H4K8ac_peak_19848 | 7.92775  | THAP7_ENSG00000184436;THAP7-AS1_ENSG00000230513                       |
| 22 | 21356165 | 21356893 | KD2-H4K8ac_peak_19849 | 18.25771 | THAP7_ENSG00000184436;THAP7-AS1_ENSG00000230513                       |
| 22 | 21357250 | 21357558 | KD2-H4K8ac_peak_19850 | 9.36516  | THAP7_ENSG00000184436                                                 |
| 22 | 21368200 | 21368425 | KD2-H4K8ac_peak_19851 | 7.49599  | TUBA3FP_ENSG00000161149                                               |
| 22 | 21368792 | 21369004 | KD2-H4K8ac_peak_19852 | 6.36375  | TUBA3FP_ENSG00000161149                                               |
| 22 | 21369284 | 21370463 | KD2-H4K8ac_peak_19853 | 16.09057 | TUBA3FP_ENSG00000161149                                               |
| 22 | 21400252 | 21400623 | KD2-H4K8ac_peak_19854 | 9.1707   | P2RX6P_ENSG00000206145;AC002472.13_ENSG00000187905                    |
| 22 | 21457315 | 21457539 | KD2-H4K8ac_peak_19855 | 15.22643 | BCRP2_ENSG00000169668                                                 |
| 22 | 21770730 | 21770934 | KD2-H4K8ac_peak_19856 | 5.88845  | HIC2_ENSG00000169635                                                  |
| 22 | 21921470 | 21921711 | KD2-H4K8ac_peak_19857 | 6.83936  |                                                                       |
| 22 | 21922053 | 21922617 | KD2-H4K8ac_peak_19858 | 17.43561 |                                                                       |
| 22 | 21983305 | 21983615 | KD2-H4K8ac_peak_19859 | 10.08707 | YDJC_ENSG00000161179                                                  |
| 22 | 21983820 | 21984240 | KD2-H4K8ac_peak_19860 | 15.58442 | YDJC_ENSG00000161179                                                  |
| 22 | 21984532 | 21984794 | KD2-H4K8ac_peak_19861 | 12.00273 | YDJC_ENSG00000161179                                                  |
| 22 | 21996629 | 21996830 | KD2-H4K8ac_peak_19862 | 7.1181   | SDF2L1_ENSG00000128228                                                |
| 22 | 22005799 | 22006236 | KD2-H4K8ac_peak_19863 | 10.46874 | PPIL2_ENSG00000100023                                                 |
| 22 | 22006545 | 22007303 | KD2-H4K8ac_peak_19864 | 7.0754   | PPIL2_ENSG00000100023;MIR301B_ENSG00000212102;MIR130B_ENSG00000207751 |
| 22 | 22011475 | 22012746 | KD2-H4K8ac_peak_19865 | 13.26049 |                                                                       |
| 22 | 22019556 | 22020846 | KD2-H4K8ac_peak_19866 | 20.42362 |                                                                       |
| 22 | 22089757 | 22090014 | KD2-H4K8ac_peak_19867 | 11.09936 | YPEL1_ENSG00000100027                                                 |
| 22 | 22090521 | 22090827 | KD2-H4K8ac_peak_19868 | 5.01002  | YPEL1_ENSG00000100027                                                 |
| 22 | 22222147 | 22222370 | KD2-H4K8ac_peak_19869 | 10.96455 | MAPK1_ENSG00000100030                                                 |
| 22 | 22306617 | 22307156 | KD2-H4K8ac_peak_19870 | 8.59579  | PPM1F_ENSG00000100034                                                 |

|    |          |          |                       |          |                                                                                |
|----|----------|----------|-----------------------|----------|--------------------------------------------------------------------------------|
| 22 | 22652561 | 22652873 | KD2-H4K8ac_peak_19871 | 11.92978 |                                                                                |
| 22 | 22862697 | 22863103 | KD2-H4K8ac_peak_19872 | 6.8713   | ZNF280B_ENSG00000198477                                                        |
| 22 | 22899657 | 22899999 | KD2-H4K8ac_peak_19873 | 13.74404 |                                                                                |
| 22 | 22901374 | 22901603 | KD2-H4K8ac_peak_19874 | 10.05606 | PRAME_ENSG00000185686;LL22NC03-63E9.3_ENSG00000220891                          |
| 22 | 22901891 | 22902193 | KD2-H4K8ac_peak_19875 | 7.98621  | PRAME_ENSG00000185686;LL22NC03-63E9.3_ENSG00000220891                          |
| 22 | 22993886 | 22994233 | KD2-H4K8ac_peak_19876 | 5.15777  |                                                                                |
| 22 | 23411856 | 23412257 | KD2-H4K8ac_peak_19877 | 8.30974  | GNAZ_ENSG00000128266                                                           |
| 22 | 23412664 | 23413339 | KD2-H4K8ac_peak_19878 | 7.99241  | GNAZ_ENSG00000128266                                                           |
| 22 | 23453518 | 23453879 | KD2-H4K8ac_peak_19879 | 5.71749  |                                                                                |
| 22 | 23455563 | 23455857 | KD2-H4K8ac_peak_19880 | 6.30229  |                                                                                |
| 22 | 23483829 | 23484111 | KD2-H4K8ac_peak_19881 | 5.30799  |                                                                                |
| 22 | 23522160 | 23522472 | KD2-H4K8ac_peak_19882 | 7.47462  | BCR_ENSG00000186716;BCRP8_ENSG00000236794                                      |
| 22 | 23744510 | 23744814 | KD2-H4K8ac_peak_19883 | 8.28234  | ZDHHC8P1_ENSG00000133519                                                       |
| 22 | 23745051 | 23745596 | KD2-H4K8ac_peak_19884 | 17.51891 | ZDHHC8P1_ENSG00000133519                                                       |
| 22 | 23778262 | 23778696 | KD2-H4K8ac_peak_19885 | 12.17278 |                                                                                |
| 22 | 23778935 | 23779362 | KD2-H4K8ac_peak_19886 | 5.59859  |                                                                                |
| 22 | 23779584 | 23779868 | KD2-H4K8ac_peak_19887 | 4.22101  |                                                                                |
| 22 | 23799094 | 23799968 | KD2-H4K8ac_peak_19888 | 7.76329  |                                                                                |
| 22 | 23803042 | 23803261 | KD2-H4K8ac_peak_19889 | 7.22936  |                                                                                |
| 22 | 23806703 | 23806995 | KD2-H4K8ac_peak_19890 | 6.94255  |                                                                                |
| 22 | 23843053 | 23843258 | KD2-H4K8ac_peak_19891 | 4.98072  |                                                                                |
| 22 | 23856824 | 23857084 | KD2-H4K8ac_peak_19892 | 11.51672 |                                                                                |
| 22 | 23860881 | 23861344 | KD2-H4K8ac_peak_19893 | 9.6247   |                                                                                |
| 22 | 23862787 | 23865898 | KD2-H4K8ac_peak_19894 | 30.32576 |                                                                                |
| 22 | 23875120 | 23875480 | KD2-H4K8ac_peak_19895 | 5.20908  |                                                                                |
| 22 | 23876604 | 23876808 | KD2-H4K8ac_peak_19896 | 6.56211  |                                                                                |
| 22 | 23907847 | 23908838 | KD2-H4K8ac_peak_19897 | 9.28039  | AP000345.2_ENSG00000224277                                                     |
| 22 | 24058891 | 24060103 | KD2-H4K8ac_peak_19898 | 11.04256 | GUSBP11_ENSG00000228315;KB-1572G7.2_ENSG00000273000;AP000347.2_ENSG00000272578 |
| 22 | 24093465 | 24094522 | KD2-H4K8ac_peak_19899 | 12.93209 | ZNF70_ENSG00000187792                                                          |
| 22 | 24109905 | 24110814 | KD2-H4K8ac_peak_19900 | 9.34989  | CHCHD10_ENSG00000250479;MMP11_ENSG00000099953                                  |
| 22 | 24113357 | 24113928 | KD2-H4K8ac_peak_19901 | 6.72624  |                                                                                |
| 22 | 24114589 | 24115413 | KD2-H4K8ac_peak_19902 | 13.70605 |                                                                                |
| 22 | 24128522 | 24129008 | KD2-H4K8ac_peak_19903 | 17.42905 | SMARCB1_ENSG00000099956                                                        |
| 22 | 24129201 | 24129522 | KD2-H4K8ac_peak_19904 | 32.77198 | SMARCB1_ENSG00000099956                                                        |
| 22 | 24168100 | 24168302 | KD2-H4K8ac_peak_19905 | 6.90231  |                                                                                |
| 22 | 24187307 | 24187994 | KD2-H4K8ac_peak_19906 | 7.36799  |                                                                                |
| 22 | 24188307 | 24188762 | KD2-H4K8ac_peak_19907 | 13.34898 |                                                                                |
| 22 | 24189075 | 24189409 | KD2-H4K8ac_peak_19908 | 6.04107  |                                                                                |
| 22 | 24191144 | 24191796 | KD2-H4K8ac_peak_19909 | 16.14659 |                                                                                |
| 22 | 24198888 | 24199167 | KD2-H4K8ac_peak_19910 | 10.63441 | KB-1125A3.11_ENSG00000272973;SLC2A11_ENSG00000133460                           |
| 22 | 24199383 | 24199653 | KD2-H4K8ac_peak_19911 | 5.4779   | KB-1125A3.11_ENSG00000272973;SLC2A11_ENSG00000133460                           |
| 22 | 24200135 | 24200476 | KD2-H4K8ac_peak_19912 | 9.63487  | KB-1125A3.11_ENSG00000272973                                                   |
| 22 | 24236027 | 24237602 | KD2-H4K8ac_peak_19913 | 12.69604 | MIF_ENSG00000240972                                                            |
| 22 | 24255613 | 24256135 | KD2-H4K8ac_peak_19914 | 14.74047 |                                                                                |
| 22 | 24359582 | 24360027 | KD2-H4K8ac_peak_19915 | 9.36516  |                                                                                |
| 22 | 24360376 | 24360580 | KD2-H4K8ac_peak_19916 | 3.87414  |                                                                                |

|    |          |          |                       |          |                                                                                    |
|----|----------|----------|-----------------------|----------|------------------------------------------------------------------------------------|
| 22 | 24407862 | 24408085 | KD2-H4K8ac_peak_19917 | 8.16906  | CABIN1_ENSG00000099991                                                             |
| 22 | 24638444 | 24638811 | KD2-H4K8ac_peak_19918 | 7.40111  |                                                                                    |
| 22 | 24639380 | 24640813 | KD2-H4K8ac_peak_19919 | 13.60392 | GGT5_ENSG00000099998                                                               |
| 22 | 24641221 | 24641931 | KD2-H4K8ac_peak_19920 | 9.20193  | GGT5_ENSG00000099998                                                               |
| 22 | 24643084 | 24643912 | KD2-H4K8ac_peak_19921 | 7.49599  |                                                                                    |
| 22 | 24655188 | 24655490 | KD2-H4K8ac_peak_19922 | 9.11031  |                                                                                    |
| 22 | 24660926 | 24661170 | KD2-H4K8ac_peak_19923 | 6.09229  |                                                                                    |
| 22 | 24666868 | 24667383 | KD2-H4K8ac_peak_19924 | 12.93209 | AP000354.2_ENSG00000215464;SPECC1L_ENSG00000100014;SPECC1L-ADORA2A_ENSG00000258555 |
| 22 | 24720650 | 24720928 | KD2-H4K8ac_peak_19925 | 5.14125  |                                                                                    |
| 22 | 24755493 | 24755730 | KD2-H4K8ac_peak_19926 | 7.12754  |                                                                                    |
| 22 | 24775871 | 24776118 | KD2-H4K8ac_peak_19927 | 9.11031  |                                                                                    |
| 22 | 24789073 | 24789428 | KD2-H4K8ac_peak_19928 | 3.90565  |                                                                                    |
| 22 | 24797893 | 24798532 | KD2-H4K8ac_peak_19929 | 12.2973  |                                                                                    |
| 22 | 24799543 | 24800840 | KD2-H4K8ac_peak_19930 | 14.67919 |                                                                                    |
| 22 | 24802280 | 24802530 | KD2-H4K8ac_peak_19931 | 4.06758  |                                                                                    |
| 22 | 24803097 | 24803516 | KD2-H4K8ac_peak_19932 | 6.99815  |                                                                                    |
| 22 | 24803887 | 24804135 | KD2-H4K8ac_peak_19933 | 9.09777  |                                                                                    |
| 22 | 24811737 | 24812035 | KD2-H4K8ac_peak_19934 | 7.20567  |                                                                                    |
| 22 | 24812490 | 24812941 | KD2-H4K8ac_peak_19935 | 6.55628  | ADORA2A_ENSG00000128271                                                            |
| 22 | 24816432 | 24816624 | KD2-H4K8ac_peak_19936 | 5.72327  |                                                                                    |
| 22 | 24819625 | 24819828 | KD2-H4K8ac_peak_19937 | 9.90319  |                                                                                    |
| 22 | 24820059 | 24820656 | KD2-H4K8ac_peak_19938 | 12.70308 |                                                                                    |
| 22 | 24828872 | 24829334 | KD2-H4K8ac_peak_19939 | 4.56666  |                                                                                    |
| 22 | 24840342 | 24841850 | KD2-H4K8ac_peak_19940 | 7.76104  |                                                                                    |
| 22 | 24845527 | 24846463 | KD2-H4K8ac_peak_19941 | 11.64359 |                                                                                    |
| 22 | 24919146 | 24919903 | KD2-H4K8ac_peak_19942 | 7.95563  |                                                                                    |
| 22 | 24920265 | 24920507 | KD2-H4K8ac_peak_19943 | 7.49599  |                                                                                    |
| 22 | 24950586 | 24951078 | KD2-H4K8ac_peak_19944 | 5.75452  | SNRPD3_ENSG00000100028;GUCD1_ENSG00000138867                                       |
| 22 | 24951428 | 24952212 | KD2-H4K8ac_peak_19945 | 17.94825 | SNRPD3_ENSG00000100028;GUCD1_ENSG00000138867                                       |
| 22 | 24984548 | 24984921 | KD2-H4K8ac_peak_19946 | 4.68059  |                                                                                    |
| 22 | 24988519 | 24989410 | KD2-H4K8ac_peak_19947 | 16.49944 | FAM211B_ENSG00000178026                                                            |
| 22 | 25018854 | 25019257 | KD2-H4K8ac_peak_19948 | 6.31143  |                                                                                    |
| 22 | 25029224 | 25029424 | KD2-H4K8ac_peak_19949 | 8.85813  | BCRP3_ENSG00000215481                                                              |
| 22 | 25201868 | 25202641 | KD2-H4K8ac_peak_19950 | 8.4716   | SGSM1_ENSG00000167037                                                              |
| 22 | 25289367 | 25289573 | KD2-H4K8ac_peak_19951 | 6.47962  |                                                                                    |
| 22 | 25289989 | 25290266 | KD2-H4K8ac_peak_19952 | 5.75757  |                                                                                    |
| 22 | 25346211 | 25346418 | KD2-H4K8ac_peak_19953 | 9.40857  |                                                                                    |
| 22 | 25348247 | 25348502 | KD2-H4K8ac_peak_19954 | 5.29555  | KIAA1671_ENSG00000197077                                                           |
| 22 | 25363489 | 25363869 | KD2-H4K8ac_peak_19955 | 5.91443  |                                                                                    |
| 22 | 25366175 | 25366455 | KD2-H4K8ac_peak_19956 | 10.43145 |                                                                                    |
| 22 | 25372582 | 25372832 | KD2-H4K8ac_peak_19957 | 5.02474  |                                                                                    |
| 22 | 25373327 | 25373666 | KD2-H4K8ac_peak_19958 | 7.40111  |                                                                                    |
| 22 | 25457629 | 25457834 | KD2-H4K8ac_peak_19959 | 4.42765  |                                                                                    |
| 22 | 25464257 | 25464589 | KD2-H4K8ac_peak_19960 | 6.97919  |                                                                                    |
| 22 | 25616374 | 25616579 | KD2-H4K8ac_peak_19961 | 6.8836   | CRYBB2_ENSG00000244752                                                             |
| 22 | 25631712 | 25631906 | KD2-H4K8ac_peak_19962 | 10.63441 |                                                                                    |

|    |          |          |                       |          |                                                                            |
|----|----------|----------|-----------------------|----------|----------------------------------------------------------------------------|
| 22 | 25816431 | 25816655 | KD2-H4K8ac_peak_19963 | 8.1233   |                                                                            |
| 22 | 25816919 | 25817199 | KD2-H4K8ac_peak_19964 | 13.57066 |                                                                            |
| 22 | 25871329 | 25871523 | KD2-H4K8ac_peak_19965 | 4.01115  | CTA-390C10.10_ENSG00000272977                                              |
| 22 | 25871960 | 25872564 | KD2-H4K8ac_peak_19966 | 9.15329  | CTA-390C10.10_ENSG00000272977                                              |
| 22 | 25877067 | 25877271 | KD2-H4K8ac_peak_19967 | 10.21502 |                                                                            |
| 22 | 25878865 | 25879136 | KD2-H4K8ac_peak_19968 | 4.77079  |                                                                            |
| 22 | 25888571 | 25889160 | KD2-H4K8ac_peak_19969 | 8.1233   |                                                                            |
| 22 | 25960183 | 25960744 | KD2-H4K8ac_peak_19970 | 13.02811 | CTA-407F11.8_ENSG00000234884;ADRBK2_ENSG00000100077                        |
| 22 | 25961052 | 25961345 | KD2-H4K8ac_peak_19971 | 15.61313 | CTA-407F11.8_ENSG00000234884;ADRBK2_ENSG00000100077                        |
| 22 | 26091971 | 26092244 | KD2-H4K8ac_peak_19972 | 8.55271  |                                                                            |
| 22 | 26093495 | 26093816 | KD2-H4K8ac_peak_19973 | 5.75757  |                                                                            |
| 22 | 26143914 | 26144440 | KD2-H4K8ac_peak_19974 | 6.66692  |                                                                            |
| 22 | 26165063 | 26165479 | KD2-H4K8ac_peak_19975 | 6.16888  |                                                                            |
| 22 | 26171301 | 26171565 | KD2-H4K8ac_peak_19976 | 10.96455 |                                                                            |
| 22 | 26175718 | 26176508 | KD2-H4K8ac_peak_19977 | 13.80019 |                                                                            |
| 22 | 26177650 | 26177869 | KD2-H4K8ac_peak_19978 | 5.88845  |                                                                            |
| 22 | 26178233 | 26178518 | KD2-H4K8ac_peak_19979 | 7.27716  |                                                                            |
| 22 | 26339209 | 26339434 | KD2-H4K8ac_peak_19980 | 7.44366  |                                                                            |
| 22 | 26564361 | 26564680 | KD2-H4K8ac_peak_19981 | 5.46431  | SEZ6L_ENSG00000100095                                                      |
| 22 | 26824829 | 26825042 | KD2-H4K8ac_peak_19982 | 6.40297  | ASPHD2_ENSG00000128203                                                     |
| 22 | 26825401 | 26825606 | KD2-H4K8ac_peak_19983 | 5.20998  | ASPHD2_ENSG00000128203                                                     |
| 22 | 26879331 | 26879785 | KD2-H4K8ac_peak_19984 | 20.02161 | HPS4_ENSG00000100099;SRRD_ENSG00000100104                                  |
| 22 | 26908594 | 26909064 | KD2-H4K8ac_peak_19985 | 7.27716  | TFIP11_ENSG00000100109;CTA-445C9.14_ENSG00000261188                        |
| 22 | 27013133 | 27013521 | KD2-H4K8ac_peak_19986 | 6.27931  | CRYBB1_ENSG00000100122                                                     |
| 22 | 27013864 | 27014408 | KD2-H4K8ac_peak_19987 | 8.01894  | CRYBB1_ENSG00000100122                                                     |
| 22 | 27041023 | 27041674 | KD2-H4K8ac_peak_19988 | 9.89126  | ISCA2P1_ENSG00000226912;MIAT_ENSG00000225783                               |
| 22 | 27044066 | 27044693 | KD2-H4K8ac_peak_19989 | 11.49574 |                                                                            |
| 22 | 27053037 | 27053230 | KD2-H4K8ac_peak_19990 | 10.19949 |                                                                            |
| 22 | 27053551 | 27053761 | KD2-H4K8ac_peak_19991 | 5.9696   |                                                                            |
| 22 | 27054455 | 27055224 | KD2-H4K8ac_peak_19992 | 13.56049 |                                                                            |
| 22 | 27065648 | 27065910 | KD2-H4K8ac_peak_19993 | 9.11031  |                                                                            |
| 22 | 27067912 | 27068896 | KD2-H4K8ac_peak_19994 | 13.73635 | CTA-373H7.7_ENSG00000206028;CTA-211A9.5_ENSG00000244625                    |
| 22 | 27069128 | 27069524 | KD2-H4K8ac_peak_19995 | 7.76329  | CTA-373H7.7_ENSG00000206028;CTA-211A9.5_ENSG00000244625                    |
| 22 | 27152780 | 27153150 | KD2-H4K8ac_peak_19996 | 9.89126  |                                                                            |
| 22 | 28111315 | 28111670 | KD2-H4K8ac_peak_19997 | 4.77079  | RP1-213J1P_B.1_ENSG00000227838;RP11-375H17.1_ENSG00000226169               |
| 22 | 28197222 | 28198489 | KD2-H4K8ac_peak_19998 | 14.8083  | MN1_ENSG00000169184                                                        |
| 22 | 28314989 | 28315181 | KD2-H4K8ac_peak_19999 | 5.61067  | PITPNB_ENSG00000180957;TTC28-AS1_ENSG00000235954                           |
| 22 | 28315573 | 28315881 | KD2-H4K8ac_peak_20000 | 7.98621  | PITPNB_ENSG00000180957;TTC28-AS1_ENSG00000235954;MIR3199-2_ENSG00000264073 |
| 22 | 28411464 | 28411821 | KD2-H4K8ac_peak_20001 | 7.146    |                                                                            |
| 22 | 28413065 | 28413446 | KD2-H4K8ac_peak_20002 | 7.48309  |                                                                            |
| 22 | 28413765 | 28414112 | KD2-H4K8ac_peak_20003 | 8.30974  |                                                                            |
| 22 | 28416897 | 28417109 | KD2-H4K8ac_peak_20004 | 4.211    |                                                                            |
| 22 | 28430220 | 28430739 | KD2-H4K8ac_peak_20005 | 12.93253 |                                                                            |
| 22 | 29026084 | 29026372 | KD2-H4K8ac_peak_20006 | 4.01115  |                                                                            |
| 22 | 29076014 | 29076540 | KD2-H4K8ac_peak_20007 | 12.79505 | TTC28_ENSG00000100154                                                      |
| 22 | 29138097 | 29138406 | KD2-H4K8ac_peak_20008 | 12.84642 | CHEK2_ENSG00000183765;HSCB_ENSG00000100209                                 |

|    |          |          |                       |          |                                                         |
|----|----------|----------|-----------------------|----------|---------------------------------------------------------|
| 22 | 29168044 | 29168421 | KD2-H4K8ac_peak_20009 | 7.76329  | CCDC117_ENSG00000159873                                 |
| 22 | 29168762 | 29168962 | KD2-H4K8ac_peak_20010 | 9.51625  | CCDC117_ENSG00000159873                                 |
| 22 | 29196159 | 29196446 | KD2-H4K8ac_peak_20011 | 5.9696   | XBPI_ENSG00000100219;CTA-292E10.6_ENSG00000226471       |
| 22 | 29280076 | 29280296 | KD2-H4K8ac_peak_20012 | 6.60096  | ZNRF3_ENSG00000183579                                   |
| 22 | 29319854 | 29320165 | KD2-H4K8ac_peak_20013 | 5.25071  |                                                         |
| 22 | 29426776 | 29427019 | KD2-H4K8ac_peak_20014 | 5.14125  | ZNRF3-AS1_ENSG00000177993                               |
| 22 | 29427580 | 29427790 | KD2-H4K8ac_peak_20015 | 5.54647  | ZNRF3-AS1_ENSG00000177993                               |
| 22 | 29469061 | 29469842 | KD2-H4K8ac_peak_20016 | 8.10216  | KREMEN1_ENSG00000183762                                 |
| 22 | 29601518 | 29601809 | KD2-H4K8ac_peak_20017 | 10.73134 | EMID1_ENSG00000186998                                   |
| 22 | 29663625 | 29664828 | KD2-H4K8ac_peak_20018 | 23.72814 | RHBDD3_ENSG00000100263;EWSR1_ENSG00000182944            |
| 22 | 29702019 | 29703430 | KD2-H4K8ac_peak_20019 | 13.73635 | GAS2L1_ENSG00000185340                                  |
| 22 | 29714590 | 29714848 | KD2-H4K8ac_peak_20020 | 11.05056 | RASL10A_ENSG00000100276                                 |
| 22 | 29784017 | 29784542 | KD2-H4K8ac_peak_20021 | 17.76996 |                                                         |
| 22 | 29876246 | 29876981 | KD2-H4K8ac_peak_20022 | 10.66719 | NEFH_ENSG00000100285                                    |
| 22 | 29877588 | 29877872 | KD2-H4K8ac_peak_20023 | 4.42765  |                                                         |
| 22 | 29949223 | 29949646 | KD2-H4K8ac_peak_20024 | 12.65056 |                                                         |
| 22 | 29950079 | 29950710 | KD2-H4K8ac_peak_20025 | 7.167    | THOC5_ENSG00000100296                                   |
| 22 | 29976024 | 29977086 | KD2-H4K8ac_peak_20026 | 11.22681 | NIPSNAP1_ENSG00000184117                                |
| 22 | 29977560 | 29977902 | KD2-H4K8ac_peak_20027 | 5.01002  | NIPSNAP1_ENSG00000184117                                |
| 22 | 29998691 | 29998884 | KD2-H4K8ac_peak_20028 | 6.56211  | NF2_ENSG00000186575                                     |
| 22 | 29999727 | 30000029 | KD2-H4K8ac_peak_20029 | 11.55418 | NF2_ENSG00000186575                                     |
| 22 | 30101217 | 30101796 | KD2-H4K8ac_peak_20030 | 6.72464  |                                                         |
| 22 | 30106418 | 30106714 | KD2-H4K8ac_peak_20031 | 4.93968  |                                                         |
| 22 | 30107667 | 30107882 | KD2-H4K8ac_peak_20032 | 4.52514  |                                                         |
| 22 | 30162595 | 30162838 | KD2-H4K8ac_peak_20033 | 8.30974  | ZMAT5_ENSG00000100319;UQCR10_ENSG00000184076            |
| 22 | 30163393 | 30163604 | KD2-H4K8ac_peak_20034 | 11.05056 | ZMAT5_ENSG00000100319;UQCR10_ENSG00000184076            |
| 22 | 30279225 | 30279508 | KD2-H4K8ac_peak_20035 | 9.71513  | MTMR3_ENSG00000100330                                   |
| 22 | 30604872 | 30605108 | KD2-H4K8ac_peak_20036 | 5.54647  |                                                         |
| 22 | 30641889 | 30642651 | KD2-H4K8ac_peak_20037 | 16.18205 | LIF_ENSG00000128342;RP1-102K2.8_ENSG00000268812         |
| 22 | 30646835 | 30647233 | KD2-H4K8ac_peak_20038 | 4.41495  |                                                         |
| 22 | 30648598 | 30649102 | KD2-H4K8ac_peak_20039 | 6.66359  |                                                         |
| 22 | 30649676 | 30650139 | KD2-H4K8ac_peak_20040 | 5.54647  |                                                         |
| 22 | 30650386 | 30650982 | KD2-H4K8ac_peak_20041 | 9.01743  |                                                         |
| 22 | 30651912 | 30652567 | KD2-H4K8ac_peak_20042 | 5.37864  |                                                         |
| 22 | 30686935 | 30687372 | KD2-H4K8ac_peak_20043 | 7.47462  |                                                         |
| 22 | 30752615 | 30752862 | KD2-H4K8ac_peak_20044 | 17.27647 | SF3A1_ENSG00000099995;CCDC157_ENSG00000187860           |
| 22 | 30782560 | 30783353 | KD2-H4K8ac_peak_20045 | 9.63487  |                                                         |
| 22 | 30783586 | 30784086 | KD2-H4K8ac_peak_20046 | 9.34195  |                                                         |
| 22 | 30793027 | 30793479 | KD2-H4K8ac_peak_20047 | 6.30607  | SEC14L2_ENSG00000100003                                 |
| 22 | 30819024 | 30819847 | KD2-H4K8ac_peak_20048 | 9.63487  |                                                         |
| 22 | 30820285 | 30821190 | KD2-H4K8ac_peak_20049 | 13.46824 | MTFP1_ENSG00000242114                                   |
| 22 | 30821447 | 30822019 | KD2-H4K8ac_peak_20050 | 15.25814 | MTFP1_ENSG00000242114                                   |
| 22 | 30831082 | 30831301 | KD2-H4K8ac_peak_20051 | 12.42547 | RP4-539M6.22_ENSG00000273428;AC004832.1_ENSG00000203606 |
| 22 | 30831664 | 30832312 | KD2-H4K8ac_peak_20052 | 11.30637 | RP4-539M6.22_ENSG00000273428;AC004832.1_ENSG00000203606 |
| 22 | 30840947 | 30841233 | KD2-H4K8ac_peak_20053 | 9.73431  |                                                         |
| 22 | 30987476 | 30988091 | KD2-H4K8ac_peak_20054 | 9.10868  |                                                         |



|    |          |          |                       |          |                                                    |
|----|----------|----------|-----------------------|----------|----------------------------------------------------|
| 22 | 31001325 | 31001695 | KD2-H4K8ac_peak_20055 | 7.1181   |                                                    |
| 22 | 31003269 | 31003470 | KD2-H4K8ac_peak_20056 | 5.05318  | PES1_ENSG00000100029;TCN2_ENSG00000185339          |
| 22 | 31030684 | 31031428 | KD2-H4K8ac_peak_20057 | 13.73635 | SLC35E4_ENSG00000100036                            |
| 22 | 31064099 | 31064479 | KD2-H4K8ac_peak_20058 | 7.38799  | DUSP18_ENSG00000167065                             |
| 22 | 31070966 | 31071382 | KD2-H4K8ac_peak_20059 | 8.17902  |                                                    |
| 22 | 31072117 | 31072328 | KD2-H4K8ac_peak_20060 | 5.75452  |                                                    |
| 22 | 31090132 | 31090520 | KD2-H4K8ac_peak_20061 | 7.27716  | OSBP2_ENSG00000184792                              |
| 22 | 31090937 | 31091228 | KD2-H4K8ac_peak_20062 | 8.58725  |                                                    |
| 22 | 31271984 | 31272643 | KD2-H4K8ac_peak_20063 | 5.88845  |                                                    |
| 22 | 31275485 | 31275812 | KD2-H4K8ac_peak_20064 | 6.99815  |                                                    |
| 22 | 31364488 | 31365919 | KD2-H4K8ac_peak_20065 | 23.29435 | MORC2_ENSG00000133422;TUG1_ENSG00000253352         |
| 22 | 31455799 | 31456029 | KD2-H4K8ac_peak_20066 | 4.77079  | RN7SL633P_ENSG00000240186                          |
| 22 | 31480718 | 31481680 | KD2-H4K8ac_peak_20067 | 10.05606 |                                                    |
| 22 | 31502933 | 31503494 | KD2-H4K8ac_peak_20068 | 5.9696   |                                                    |
| 22 | 31518654 | 31518846 | KD2-H4K8ac_peak_20069 | 7.36799  | INPP5J_ENSG00000185133                             |
| 22 | 31521372 | 31521750 | KD2-H4K8ac_peak_20070 | 11.43353 |                                                    |
| 22 | 31539169 | 31539498 | KD2-H4K8ac_peak_20071 | 4.47369  |                                                    |
| 22 | 31555626 | 31556045 | KD2-H4K8ac_peak_20072 | 11.43353 | MIR3928_ENSG00000264141;RNF185_ENSG00000138942     |
| 22 | 31625461 | 31625942 | KD2-H4K8ac_peak_20073 | 5.57044  | Y_RNA_ENSG00000202019                              |
| 22 | 31739980 | 31740174 | KD2-H4K8ac_peak_20074 | 7.51005  |                                                    |
| 22 | 31742112 | 31742510 | KD2-H4K8ac_peak_20075 | 7.67504  | PATZ1_ENSG00000100105;AC005003.1_ENSG00000213888   |
| 22 | 31742735 | 31743790 | KD2-H4K8ac_peak_20076 | 16.67374 | PATZ1_ENSG00000100105;AC005003.1_ENSG00000213888   |
| 22 | 31745812 | 31746152 | KD2-H4K8ac_peak_20077 | 3.75035  |                                                    |
| 22 | 31795087 | 31795312 | KD2-H4K8ac_peak_20078 | 7.76329  | DRG1_ENSG00000185721                               |
| 22 | 31795735 | 31796030 | KD2-H4K8ac_peak_20079 | 7.67504  | DRG1_ENSG00000185721                               |
| 22 | 31885224 | 31885552 | KD2-H4K8ac_peak_20080 | 9.402    | SFI1_ENSG00000198089                               |
| 22 | 31885916 | 31886325 | KD2-H4K8ac_peak_20081 | 17.94825 |                                                    |
| 22 | 31892102 | 31892357 | KD2-H4K8ac_peak_20082 | 8.82366  | EIF4ENIF1_ENSG00000184708                          |
| 22 | 31892585 | 31892887 | KD2-H4K8ac_peak_20083 | 4.44527  | EIF4ENIF1_ENSG00000184708                          |
| 22 | 32025862 | 32026292 | KD2-H4K8ac_peak_20084 | 10.54073 |                                                    |
| 22 | 32061258 | 32061582 | KD2-H4K8ac_peak_20085 | 6.27931  |                                                    |
| 22 | 32145312 | 32145504 | KD2-H4K8ac_peak_20086 | 5.20998  | PRR14L_ENSG00000183530                             |
| 22 | 32145745 | 32146064 | KD2-H4K8ac_peak_20087 | 9.20193  | PRR14L_ENSG00000183530                             |
| 22 | 32148354 | 32148566 | KD2-H4K8ac_peak_20088 | 8.66368  |                                                    |
| 22 | 32149393 | 32149773 | KD2-H4K8ac_peak_20089 | 14.56955 | DEPDC5_ENSG00000100150                             |
| 22 | 32150030 | 32150297 | KD2-H4K8ac_peak_20090 | 12.14909 | DEPDC5_ENSG00000100150                             |
| 22 | 32324846 | 32325185 | KD2-H4K8ac_peak_20091 | 4.06758  |                                                    |
| 22 | 32325609 | 32325941 | KD2-H4K8ac_peak_20092 | 9.26823  |                                                    |
| 22 | 32339431 | 32340267 | KD2-H4K8ac_peak_20093 | 15.52424 | YWHAH_ENSG00000128245                              |
| 22 | 32340505 | 32341395 | KD2-H4K8ac_peak_20094 | 22.07309 | YWHAH_ENSG00000128245;C22orf24_ENSG00000128254     |
| 22 | 32601310 | 32601518 | KD2-H4K8ac_peak_20095 | 4.52326  | RFPL2_ENSG00000128253;RP1-90G24.10_ENSG00000242082 |
| 22 | 32869779 | 32870020 | KD2-H4K8ac_peak_20096 | 7.27716  | FBXO7_ENSG00000100225                              |
| 22 | 32870788 | 32871145 | KD2-H4K8ac_peak_20097 | 11.55163 | FBXO7_ENSG00000100225                              |
| 22 | 32928310 | 32928635 | KD2-H4K8ac_peak_20098 | 7.146    |                                                    |
| 22 | 33140828 | 33141049 | KD2-H4K8ac_peak_20099 | 4.17128  |                                                    |
| 22 | 33276034 | 33276541 | KD2-H4K8ac_peak_20100 | 4.84794  |                                                    |

|    |          |          |                       |          |                                                       |
|----|----------|----------|-----------------------|----------|-------------------------------------------------------|
| 22 | 33277495 | 33278352 | KD2-H4K8ac_peak_20101 | 24.47492 |                                                       |
| 22 | 33279500 | 33280104 | KD2-H4K8ac_peak_20102 | 4.86324  |                                                       |
| 22 | 33281836 | 33282039 | KD2-H4K8ac_peak_20103 | 5.1313   |                                                       |
| 22 | 33282908 | 33283147 | KD2-H4K8ac_peak_20104 | 7.01658  |                                                       |
| 22 | 33299496 | 33299697 | KD2-H4K8ac_peak_20105 | 5.14125  |                                                       |
| 22 | 33300328 | 33301502 | KD2-H4K8ac_peak_20106 | 7.9265   |                                                       |
| 22 | 33301872 | 33302124 | KD2-H4K8ac_peak_20107 | 5.9696   |                                                       |
| 22 | 33307351 | 33307778 | KD2-H4K8ac_peak_20108 | 5.14125  |                                                       |
| 22 | 33313572 | 33314049 | KD2-H4K8ac_peak_20109 | 6.66359  |                                                       |
| 22 | 33314854 | 33315336 | KD2-H4K8ac_peak_20110 | 10.43145 |                                                       |
| 22 | 33346096 | 33347360 | KD2-H4K8ac_peak_20111 | 8.16906  |                                                       |
| 22 | 33347587 | 33347818 | KD2-H4K8ac_peak_20112 | 9.34989  |                                                       |
| 22 | 33348097 | 33348692 | KD2-H4K8ac_peak_20113 | 7.47462  |                                                       |
| 22 | 33352834 | 33353141 | KD2-H4K8ac_peak_20114 | 6.2781   |                                                       |
| 22 | 33353600 | 33354375 | KD2-H4K8ac_peak_20115 | 9.11031  |                                                       |
| 22 | 33359848 | 33360135 | KD2-H4K8ac_peak_20116 | 8.62078  |                                                       |
| 22 | 33383249 | 33383590 | KD2-H4K8ac_peak_20117 | 4.42765  |                                                       |
| 22 | 33387845 | 33388238 | KD2-H4K8ac_peak_20118 | 9.51625  |                                                       |
| 22 | 33396550 | 33396751 | KD2-H4K8ac_peak_20119 | 8.59579  |                                                       |
| 22 | 33454582 | 33454882 | KD2-H4K8ac_peak_20120 | 12.85889 | SYN3_ENSG00000185666                                  |
| 22 | 34317580 | 34317966 | KD2-H4K8ac_peak_20121 | 7.47462  | LARGE_ENSG00000133424;LL22NC03-32F9.1_ENSG00000273082 |
| 22 | 35552834 | 35553124 | KD2-H4K8ac_peak_20122 | 8.1233   |                                                       |
| 22 | 35653526 | 35654039 | KD2-H4K8ac_peak_20123 | 12.00597 | HMGXB4_ENSG00000100281                                |
| 22 | 35746609 | 35746810 | KD2-H4K8ac_peak_20124 | 9.56945  |                                                       |
| 22 | 35777090 | 35777575 | KD2-H4K8ac_peak_20125 | 13.31016 | HMOX1_ENSG00000100292                                 |
| 22 | 35795187 | 35795714 | KD2-H4K8ac_peak_20126 | 8.53092  | MCM5_ENSG00000100297                                  |
| 22 | 35848426 | 35849114 | KD2-H4K8ac_peak_20127 | 6.99815  |                                                       |
| 22 | 35863718 | 35864313 | KD2-H4K8ac_peak_20128 | 13.09607 |                                                       |
| 22 | 35885096 | 35885530 | KD2-H4K8ac_peak_20129 | 10.05606 |                                                       |
| 22 | 35919374 | 35919771 | KD2-H4K8ac_peak_20130 | 10.53596 |                                                       |
| 22 | 35920263 | 35920553 | KD2-H4K8ac_peak_20131 | 5.6755   |                                                       |
| 22 | 35922011 | 35922585 | KD2-H4K8ac_peak_20132 | 8.09472  | RP4-569D19.8_ENSG00000273044                          |
| 22 | 35936100 | 35936431 | KD2-H4K8ac_peak_20133 | 9.66321  | RASD2_ENSG00000100302                                 |
| 22 | 35982792 | 35983101 | KD2-H4K8ac_peak_20134 | 6.9556   |                                                       |
| 22 | 35988625 | 35988947 | KD2-H4K8ac_peak_20135 | 9.242    |                                                       |
| 22 | 36001752 | 36002119 | KD2-H4K8ac_peak_20136 | 14.27217 |                                                       |
| 22 | 36002469 | 36002831 | KD2-H4K8ac_peak_20137 | 11.05467 |                                                       |
| 22 | 36003247 | 36003893 | KD2-H4K8ac_peak_20138 | 5.88845  |                                                       |
| 22 | 36034981 | 36035256 | KD2-H4K8ac_peak_20139 | 5.45396  | MB_ENSG00000198125                                    |
| 22 | 36312351 | 36312806 | KD2-H4K8ac_peak_20140 | 7.47462  |                                                       |
| 22 | 36366402 | 36366869 | KD2-H4K8ac_peak_20141 | 7.13615  |                                                       |
| 22 | 36370404 | 36371040 | KD2-H4K8ac_peak_20142 | 6.30229  |                                                       |
| 22 | 36404599 | 36404801 | KD2-H4K8ac_peak_20143 | 4.57371  |                                                       |
| 22 | 36413276 | 36413502 | KD2-H4K8ac_peak_20144 | 7.47462  |                                                       |
| 22 | 36414517 | 36414795 | KD2-H4K8ac_peak_20145 | 4.01115  |                                                       |
| 22 | 36424042 | 36424938 | KD2-H4K8ac_peak_20146 | 12.2054  | RBFOX2_ENSG00000100320                                |

|    |          |          |                       |          |                                                      |
|----|----------|----------|-----------------------|----------|------------------------------------------------------|
| 22 | 36430843 | 36431119 | KD2-H4K8ac_peak_20147 | 8.37231  |                                                      |
| 22 | 36433246 | 36433817 | KD2-H4K8ac_peak_20148 | 8.85813  |                                                      |
| 22 | 36461518 | 36461793 | KD2-H4K8ac_peak_20149 | 4.06758  |                                                      |
| 22 | 36462156 | 36463036 | KD2-H4K8ac_peak_20150 | 6.66359  |                                                      |
| 22 | 36506220 | 36506690 | KD2-H4K8ac_peak_20151 | 8.94469  |                                                      |
| 22 | 36597404 | 36598443 | KD2-H4K8ac_peak_20152 | 6.40297  |                                                      |
| 22 | 36634919 | 36635228 | KD2-H4K8ac_peak_20153 | 3.90565  | APOL2_ENSG00000128335                                |
| 22 | 36651087 | 36651542 | KD2-H4K8ac_peak_20154 | 10.46264 |                                                      |
| 22 | 36783596 | 36783887 | KD2-H4K8ac_peak_20155 | 4.67342  | MYH9_ENSG00000100345;RP4-633O19__A.1_ENSG00000223695 |
| 22 | 36828592 | 36828800 | KD2-H4K8ac_peak_20156 | 4.66652  |                                                      |
| 22 | 36850856 | 36851902 | KD2-H4K8ac_peak_20157 | 13.70605 | RP5-1119A7.14_ENSG00000228719                        |
| 22 | 36877055 | 36878075 | KD2-H4K8ac_peak_20158 | 15.81711 | TXN2_ENSG00000100348                                 |
| 22 | 36878405 | 36878624 | KD2-H4K8ac_peak_20159 | 8.55271  | TXN2_ENSG00000100348                                 |
| 22 | 36902286 | 36902840 | KD2-H4K8ac_peak_20160 | 10.05081 | FOXRED2_ENSG00000100350                              |
| 22 | 36903505 | 36903717 | KD2-H4K8ac_peak_20161 | 4.8888   | FOXRED2_ENSG00000100350                              |
| 22 | 36925873 | 36926513 | KD2-H4K8ac_peak_20162 | 7.36799  | EIF3D_ENSG00000100353                                |
| 22 | 36966110 | 36966321 | KD2-H4K8ac_peak_20163 | 5.88845  |                                                      |
| 22 | 37055901 | 37056719 | KD2-H4K8ac_peak_20164 | 6.40683  |                                                      |
| 22 | 37139947 | 37140433 | KD2-H4K8ac_peak_20165 | 6.0073   |                                                      |
| 22 | 37172757 | 37173057 | KD2-H4K8ac_peak_20166 | 10.19949 | IFT27_ENSG00000100360                                |
| 22 | 37373448 | 37374011 | KD2-H4K8ac_peak_20167 | 7.47462  |                                                      |
| 22 | 37376630 | 37377165 | KD2-H4K8ac_peak_20168 | 5.73839  |                                                      |
| 22 | 37415296 | 37415743 | KD2-H4K8ac_peak_20169 | 22.21705 | TST_ENSG00000128311;MPST_ENSG00000128309             |
| 22 | 37415961 | 37416329 | KD2-H4K8ac_peak_20170 | 11.92978 | TST_ENSG00000128311;MPST_ENSG00000128309             |
| 22 | 37430094 | 37430340 | KD2-H4K8ac_peak_20171 | 6.40683  |                                                      |
| 22 | 37447819 | 37448091 | KD2-H4K8ac_peak_20172 | 11.66477 | KCTD17_ENSG00000100379                               |
| 22 | 37562876 | 37563138 | KD2-H4K8ac_peak_20173 | 7.0754   | RP1-151B14.6_ENSG00000235237                         |
| 22 | 37583048 | 37583408 | KD2-H4K8ac_peak_20174 | 8.09303  |                                                      |
| 22 | 37583716 | 37584214 | KD2-H4K8ac_peak_20175 | 10.43145 |                                                      |
| 22 | 37594932 | 37595401 | KD2-H4K8ac_peak_20176 | 15.69572 | C1QTNF6_ENSG00000133466                              |
| 22 | 37595741 | 37596125 | KD2-H4K8ac_peak_20177 | 14.39182 | C1QTNF6_ENSG00000133466                              |
| 22 | 37607946 | 37608145 | KD2-H4K8ac_peak_20178 | 7.27716  | SSTR3_ENSG00000183473                                |
| 22 | 37608642 | 37608894 | KD2-H4K8ac_peak_20179 | 7.47462  | SSTR3_ENSG00000183473                                |
| 22 | 37625092 | 37625390 | KD2-H4K8ac_peak_20180 | 4.95193  |                                                      |
| 22 | 37663300 | 37663953 | KD2-H4K8ac_peak_20181 | 16.11042 |                                                      |
| 22 | 37740878 | 37742382 | KD2-H4K8ac_peak_20182 | 8.10216  |                                                      |
| 22 | 37767374 | 37768063 | KD2-H4K8ac_peak_20183 | 5.57044  | RP1-63G5.8_ENSG00000272694                           |
| 22 | 37816403 | 37816704 | KD2-H4K8ac_peak_20184 | 8.30974  |                                                      |
| 22 | 37860076 | 37860316 | KD2-H4K8ac_peak_20185 | 6.8836   |                                                      |
| 22 | 37879767 | 37880191 | KD2-H4K8ac_peak_20186 | 9.51688  |                                                      |
| 22 | 37882145 | 37882745 | KD2-H4K8ac_peak_20187 | 5.88845  | MFNG_ENSG00000100060                                 |
| 22 | 37883060 | 37883307 | KD2-H4K8ac_peak_20188 | 5.88845  | MFNG_ENSG00000100060                                 |
| 22 | 37904447 | 37905790 | KD2-H4K8ac_peak_20189 | 14.22723 |                                                      |
| 22 | 37914816 | 37915338 | KD2-H4K8ac_peak_20190 | 9.34195  | CARD10_ENSG00000100065                               |
| 22 | 37955987 | 37956315 | KD2-H4K8ac_peak_20191 | 9.36516  | CDC42EP1_ENSG00000128283                             |
| 22 | 37957040 | 37957806 | KD2-H4K8ac_peak_20192 | 10.05606 | CDC42EP1_ENSG00000128283                             |

|    |          |          |                       |          |                                                                      |
|----|----------|----------|-----------------------|----------|----------------------------------------------------------------------|
| 22 | 38004982 | 38005411 | KD2-H4K8ac_peak_20193 | 10.84242 | GGA1_ENSG00000100083                                                 |
| 22 | 38029180 | 38029566 | KD2-H4K8ac_peak_20194 | 11.28765 |                                                                      |
| 22 | 38031497 | 38031785 | KD2-H4K8ac_peak_20195 | 4.90805  | SH3BP1_ENSG00000100092                                               |
| 22 | 38035119 | 38035746 | KD2-H4K8ac_peak_20196 | 5.4779   |                                                                      |
| 22 | 38070502 | 38071389 | KD2-H4K8ac_peak_20197 | 8.10216  | LGALS1_ENSG00000100097                                               |
| 22 | 38071713 | 38072080 | KD2-H4K8ac_peak_20198 | 5.98764  | LGALS1_ENSG00000100097                                               |
| 22 | 38072444 | 38072967 | KD2-H4K8ac_peak_20199 | 5.13615  | LGALS1_ENSG00000100097                                               |
| 22 | 38081771 | 38083110 | KD2-H4K8ac_peak_20200 | 14.275   |                                                                      |
| 22 | 38093071 | 38093590 | KD2-H4K8ac_peak_20201 | 8.85813  | TRIOBP_ENSG00000100106                                               |
| 22 | 38137087 | 38137303 | KD2-H4K8ac_peak_20202 | 6.30607  |                                                                      |
| 22 | 38141747 | 38142028 | KD2-H4K8ac_peak_20203 | 18.54875 |                                                                      |
| 22 | 38142347 | 38143042 | KD2-H4K8ac_peak_20204 | 11.80283 |                                                                      |
| 22 | 38147634 | 38148262 | KD2-H4K8ac_peak_20205 | 7.146    |                                                                      |
| 22 | 38148670 | 38149047 | KD2-H4K8ac_peak_20206 | 9.1707   |                                                                      |
| 22 | 38198086 | 38198837 | KD2-H4K8ac_peak_20207 | 19.88442 |                                                                      |
| 22 | 38200016 | 38201129 | KD2-H4K8ac_peak_20208 | 23.08992 | H1FO_ENSG00000189060                                                 |
| 22 | 38214474 | 38214930 | KD2-H4K8ac_peak_20209 | 9.23578  |                                                                      |
| 22 | 38240031 | 38240322 | KD2-H4K8ac_peak_20210 | 8.16906  | MIR658_ENSG00000207945                                               |
| 22 | 38244421 | 38245212 | KD2-H4K8ac_peak_20211 | 9.51625  | ANKRD54_ENSG00000100124;MIR659_ENSG00000207696;EIF3L_ENSG00000100129 |
| 22 | 38245465 | 38245724 | KD2-H4K8ac_peak_20212 | 10.19949 | ANKRD54_ENSG00000100124;EIF3L_ENSG00000100129                        |
| 22 | 38301299 | 38303020 | KD2-H4K8ac_peak_20213 | 12.93209 | MICALL1_ENSG00000100139                                              |
| 22 | 38453194 | 38453596 | KD2-H4K8ac_peak_20214 | 9.15329  | PICK1_ENSG00000100151                                                |
| 22 | 38476878 | 38477470 | KD2-H4K8ac_peak_20215 | 8.1233   |                                                                      |
| 22 | 38669088 | 38669317 | KD2-H4K8ac_peak_20216 | 8.1233   | TMEM184B_ENSG00000198792                                             |
| 22 | 38712886 | 38713300 | KD2-H4K8ac_peak_20217 | 10.21502 |                                                                      |
| 22 | 38713558 | 38714078 | KD2-H4K8ac_peak_20218 | 4.42765  |                                                                      |
| 22 | 38851765 | 38852113 | KD2-H4K8ac_peak_20219 | 7.12754  | KCNJ4_ENSG00000168135                                                |
| 22 | 38857327 | 38857584 | KD2-H4K8ac_peak_20220 | 9.02371  |                                                                      |
| 22 | 38901510 | 38902152 | KD2-H4K8ac_peak_20221 | 8.1718   |                                                                      |
| 22 | 38902720 | 38903543 | KD2-H4K8ac_peak_20222 | 8.59579  | DDX17_ENSG00000100201                                                |
| 22 | 38965792 | 38965987 | KD2-H4K8ac_peak_20223 | 7.12754  | DMC1_ENSG00000100206                                                 |
| 22 | 38966484 | 38966741 | KD2-H4K8ac_peak_20224 | 9.15329  | DMC1_ENSG00000100206                                                 |
| 22 | 39052425 | 39052917 | KD2-H4K8ac_peak_20225 | 13.57066 | FAM227A_ENSG00000184949;CBY1_ENSG00000100211                         |
| 22 | 39078108 | 39078443 | KD2-H4K8ac_peak_20226 | 7.12754  | RP3-508I15.9_ENSG00000228274;TOMM22_ENSG00000100216                  |
| 22 | 39102004 | 39102206 | KD2-H4K8ac_peak_20227 | 8.1233   | GTPBP1_ENSG00000100226                                               |
| 22 | 39151550 | 39151820 | KD2-H4K8ac_peak_20228 | 7.27716  |                                                                      |
| 22 | 39152215 | 39152462 | KD2-H4K8ac_peak_20229 | 6.66692  |                                                                      |
| 22 | 39158853 | 39159091 | KD2-H4K8ac_peak_20230 | 5.07241  |                                                                      |
| 22 | 39165090 | 39165374 | KD2-H4K8ac_peak_20231 | 4.77079  |                                                                      |
| 22 | 39190559 | 39190778 | KD2-H4K8ac_peak_20232 | 10.21502 | SUN2_ENSG00000100242;DNAL4_ENSG00000100246                           |
| 22 | 39268854 | 39269171 | KD2-H4K8ac_peak_20233 | 12.06346 | CBX6_ENSG00000183741                                                 |
| 22 | 39269891 | 39270088 | KD2-H4K8ac_peak_20234 | 7.12754  |                                                                      |
| 22 | 39409758 | 39409989 | KD2-H4K8ac_peak_20235 | 7.27716  | APOBEC3C_ENSG00000244509;APOBEC3D_ENSG00000243811                    |
| 22 | 39416565 | 39416791 | KD2-H4K8ac_peak_20236 | 7.27716  |                                                                      |
| 22 | 39417334 | 39417649 | KD2-H4K8ac_peak_20237 | 4.42765  |                                                                      |
| 22 | 39436830 | 39437034 | KD2-H4K8ac_peak_20238 | 11.30637 | APOBEC3F_ENSG00000128394;APOBEC3G_ENSG00000239713                    |

|    |          |          |                       |          |                                                     |
|----|----------|----------|-----------------------|----------|-----------------------------------------------------|
| 22 | 39493281 | 39493610 | KD2-H4K8ac_peak_20239 | 8.1233   | APOBEC3H_ENSG00000100298                            |
| 22 | 39541367 | 39541621 | KD2-H4K8ac_peak_20240 | 8.17902  |                                                     |
| 22 | 39715956 | 39716383 | KD2-H4K8ac_peak_20241 | 10.21502 | RPL3_ENSG00000100316;SNORD43_ENSG00000263764        |
| 22 | 39744954 | 39745637 | KD2-H4K8ac_peak_20242 | 5.45396  | SYNGR1_ENSG00000100321                              |
| 22 | 39795276 | 39795479 | KD2-H4K8ac_peak_20243 | 6.16888  | TAB1_ENSG00000100324                                |
| 22 | 39795809 | 39796120 | KD2-H4K8ac_peak_20244 | 17.14886 | TAB1_ENSG00000100324                                |
| 22 | 39833708 | 39833948 | KD2-H4K8ac_peak_20245 | 11.30637 |                                                     |
| 22 | 39852827 | 39853099 | KD2-H4K8ac_peak_20246 | 10.08707 | MGAT3_ENSG00000128268                               |
| 22 | 39853531 | 39854333 | KD2-H4K8ac_peak_20247 | 5.88845  | MGAT3_ENSG00000128268                               |
| 22 | 39886478 | 39886689 | KD2-H4K8ac_peak_20248 | 8.1233   |                                                     |
| 22 | 39897844 | 39898116 | KD2-H4K8ac_peak_20249 | 9.59147  |                                                     |
| 22 | 39915525 | 39915997 | KD2-H4K8ac_peak_20250 | 4.42765  | ATF4_ENSG00000128272                                |
| 22 | 39916633 | 39916927 | KD2-H4K8ac_peak_20251 | 5.30799  | ATF4_ENSG00000128272                                |
| 22 | 39928379 | 39928688 | KD2-H4K8ac_peak_20252 | 11.00372 | RPS19BP1_ENSG00000187051                            |
| 22 | 41032288 | 41032645 | KD2-H4K8ac_peak_20253 | 7.13615  | MKL1_ENSG00000196588                                |
| 22 | 41033111 | 41033368 | KD2-H4K8ac_peak_20254 | 7.59643  | MKL1_ENSG00000196588                                |
| 22 | 41047911 | 41048114 | KD2-H4K8ac_peak_20255 | 8.1233   |                                                     |
| 22 | 41048318 | 41048528 | KD2-H4K8ac_peak_20256 | 6.16888  |                                                     |
| 22 | 41252323 | 41252540 | KD2-H4K8ac_peak_20257 | 4.3015   | ST13_ENSG00000100380;XPNPEP3_ENSG00000196236        |
| 22 | 41346661 | 41346967 | KD2-H4K8ac_peak_20258 | 5.57044  | RBX1_ENSG00000100387                                |
| 22 | 41417976 | 41418817 | KD2-H4K8ac_peak_20259 | 7.47462  |                                                     |
| 22 | 41487852 | 41488599 | KD2-H4K8ac_peak_20260 | 9.11031  | EP300_ENSG00000100393;MIR1281_ENSG00000221160       |
| 22 | 41601412 | 41601615 | KD2-H4K8ac_peak_20261 | 5.57044  | L3MBTL2_ENSG00000100395                             |
| 22 | 41798030 | 41798683 | KD2-H4K8ac_peak_20262 | 8.1233   |                                                     |
| 22 | 41809178 | 41809963 | KD2-H4K8ac_peak_20263 | 11.30637 |                                                     |
| 22 | 41843312 | 41844296 | KD2-H4K8ac_peak_20264 | 10.30284 | TOB2_ENSG00000183864                                |
| 22 | 41956573 | 41956782 | KD2-H4K8ac_peak_20265 | 4.37708  | CSDC2_ENSG00000172346                               |
| 22 | 42017345 | 42017671 | KD2-H4K8ac_peak_20266 | 12.42547 | DESII_ENSG00000100418;XRCC6_ENSG00000196419         |
| 22 | 42062930 | 42063197 | KD2-H4K8ac_peak_20267 | 4.42765  |                                                     |
| 22 | 42195922 | 42196247 | KD2-H4K8ac_peak_20268 | 7.27716  | CCDC134_ENSG00000100147                             |
| 22 | 42228309 | 42228608 | KD2-H4K8ac_peak_20269 | 8.1718   | SREBF2_ENSG00000198911                              |
| 22 | 42229467 | 42229828 | KD2-H4K8ac_peak_20270 | 8.30974  | RP5-821D11.7_ENSG00000184068;SREBF2_ENSG00000198911 |
| 22 | 42469859 | 42470580 | KD2-H4K8ac_peak_20271 | 9.11031  | FAM109B_ENSG00000177096                             |
| 22 | 42475076 | 42475475 | KD2-H4K8ac_peak_20272 | 12.42547 | SMDT1_ENSG00000183172                               |
| 22 | 42739294 | 42739523 | KD2-H4K8ac_peak_20273 | 8.1233   | TCF20_ENSG00000100207                               |
| 22 | 42743504 | 42743808 | KD2-H4K8ac_peak_20274 | 6.16888  |                                                     |
| 22 | 42761496 | 42761932 | KD2-H4K8ac_peak_20275 | 5.14125  |                                                     |
| 22 | 42808871 | 42809070 | KD2-H4K8ac_peak_20276 | 6.16888  |                                                     |
| 22 | 42839832 | 42840081 | KD2-H4K8ac_peak_20277 | 5.25071  |                                                     |
| 22 | 42977683 | 42977954 | KD2-H4K8ac_peak_20278 | 7.12754  | RRP7B_ENSG00000182841                               |
| 22 | 43539639 | 43539892 | KD2-H4K8ac_peak_20279 | 6.16888  | MCAT_ENSG00000100294                                |
| 22 | 43547042 | 43547407 | KD2-H4K8ac_peak_20280 | 6.66692  | TSPO_ENSG00000100300                                |
| 22 | 43547637 | 43547842 | KD2-H4K8ac_peak_20281 | 6.07178  | TSPO_ENSG00000100300                                |
| 22 | 43660638 | 43660834 | KD2-H4K8ac_peak_20282 | 4.01115  |                                                     |
| 22 | 43685789 | 43686239 | KD2-H4K8ac_peak_20283 | 9.10868  |                                                     |
| 22 | 44208353 | 44208689 | KD2-H4K8ac_peak_20284 | 4.42765  | EFCAB6_ENSG00000186976;RP3-388M5.9_ENSG00000261251  |

|    |          |          |                       |          |                                                                                                           |
|----|----------|----------|-----------------------|----------|-----------------------------------------------------------------------------------------------------------|
| 22 | 44319758 | 44320376 | KD2-H4K8ac_peak_20285 | 4.86324  | PNPLA3_ENSG00000100344                                                                                    |
| 22 | 44350914 | 44351534 | KD2-H4K8ac_peak_20286 | 13.80019 | SAMM50_ENSG00000100347                                                                                    |
| 22 | 44419912 | 44420737 | KD2-H4K8ac_peak_20287 | 17.70837 |                                                                                                           |
| 22 | 44444519 | 44445363 | KD2-H4K8ac_peak_20288 | 7.36799  |                                                                                                           |
| 22 | 44791033 | 44791418 | KD2-H4K8ac_peak_20289 | 8.55271  |                                                                                                           |
| 22 | 44893448 | 44894096 | KD2-H4K8ac_peak_20290 | 35.93287 | LDOC1L_ENSG00000188636                                                                                    |
| 22 | 44894489 | 44894761 | KD2-H4K8ac_peak_20291 | 9.77606  | LDOC1L_ENSG00000188636                                                                                    |
| 22 | 45036086 | 45036472 | KD2-H4K8ac_peak_20292 | 7.70289  |                                                                                                           |
| 22 | 45054349 | 45054624 | KD2-H4K8ac_peak_20293 | 4.70206  |                                                                                                           |
| 22 | 45064069 | 45064439 | KD2-H4K8ac_peak_20294 | 7.76329  | PRR5_ENSG00000186654                                                                                      |
| 22 | 45072442 | 45073403 | KD2-H4K8ac_peak_20295 | 12.06346 |                                                                                                           |
| 22 | 45081563 | 45081804 | KD2-H4K8ac_peak_20296 | 7.13615  |                                                                                                           |
| 22 | 45097555 | 45097825 | KD2-H4K8ac_peak_20297 | 8.02571  | PRR5-ARHGAP8_ENSG00000248405;ARHGAP8_ENSG00000241484                                                      |
| 22 | 45124970 | 45125502 | KD2-H4K8ac_peak_20298 | 8.1235   |                                                                                                           |
| 22 | 45125778 | 45126145 | KD2-H4K8ac_peak_20299 | 12.93007 |                                                                                                           |
| 22 | 45148136 | 45148364 | KD2-H4K8ac_peak_20300 | 11.80497 |                                                                                                           |
| 22 | 45154111 | 45154310 | KD2-H4K8ac_peak_20301 | 5.61377  |                                                                                                           |
| 22 | 45403759 | 45404142 | KD2-H4K8ac_peak_20302 | 7.8711   |                                                                                                           |
| 22 | 45405305 | 45405635 | KD2-H4K8ac_peak_20303 | 7.36799  | PHF21B_ENSG00000056487                                                                                    |
| 22 | 45559323 | 45559699 | KD2-H4K8ac_peak_20304 | 11.95211 | CTA-217C.1_ENSG00000226328;NUP50_ENSG00000093000                                                          |
| 22 | 45559947 | 45560212 | KD2-H4K8ac_peak_20305 | 8.17902  | CTA-217C.1_ENSG00000226328;NUP50_ENSG00000093000                                                          |
| 22 | 45608077 | 45608527 | KD2-H4K8ac_peak_20306 | 10.21366 |                                                                                                           |
| 22 | 45637009 | 45637523 | KD2-H4K8ac_peak_20307 | 15.09202 | KIAA0930_ENSG00000100364                                                                                  |
| 22 | 45641945 | 45642147 | KD2-H4K8ac_peak_20308 | 5.14125  |                                                                                                           |
| 22 | 45659449 | 45659698 | KD2-H4K8ac_peak_20309 | 10.96455 | CTA-268H5.14_ENSG00000273287                                                                              |
| 22 | 45660027 | 45660236 | KD2-H4K8ac_peak_20310 | 8.26945  | CTA-268H5.14_ENSG00000273287                                                                              |
| 22 | 45663760 | 45664009 | KD2-H4K8ac_peak_20311 | 7.27716  |                                                                                                           |
| 22 | 45665413 | 45665635 | KD2-H4K8ac_peak_20312 | 4.76709  |                                                                                                           |
| 22 | 45704915 | 45705331 | KD2-H4K8ac_peak_20313 | 7.98621  | FAM118A_ENSG00000100376                                                                                   |
| 22 | 45897964 | 45898646 | KD2-H4K8ac_peak_20314 | 12.82393 | FBLN1_ENSG00000077942                                                                                     |
| 22 | 45899831 | 45900336 | KD2-H4K8ac_peak_20315 | 7.372    |                                                                                                           |
| 22 | 45900589 | 45901058 | KD2-H4K8ac_peak_20316 | 9.65086  |                                                                                                           |
| 22 | 46067211 | 46068410 | KD2-H4K8ac_peak_20317 | 15.40891 | ATXN10_ENSG00000130638                                                                                    |
| 22 | 46282177 | 46282418 | KD2-H4K8ac_peak_20318 | 10.54933 |                                                                                                           |
| 22 | 46390940 | 46391220 | KD2-H4K8ac_peak_20319 | 12.93253 |                                                                                                           |
| 22 | 46392309 | 46392656 | KD2-H4K8ac_peak_20320 | 8.5092   |                                                                                                           |
| 22 | 46393016 | 46393494 | KD2-H4K8ac_peak_20321 | 11.15405 |                                                                                                           |
| 22 | 46393709 | 46393953 | KD2-H4K8ac_peak_20322 | 6.10575  |                                                                                                           |
| 22 | 46402561 | 46404438 | KD2-H4K8ac_peak_20323 | 10.01546 |                                                                                                           |
| 22 | 46409487 | 46410305 | KD2-H4K8ac_peak_20324 | 15.20126 | CITF22-92A6.1_ENSG00000273145                                                                             |
| 22 | 46436521 | 46436750 | KD2-H4K8ac_peak_20325 | 7.76329  |                                                                                                           |
| 22 | 46439696 | 46441306 | KD2-H4K8ac_peak_20326 | 9.11031  | LINC00899_ENSG00000231711                                                                                 |
| 22 | 46448890 | 46450090 | KD2-H4K8ac_peak_20327 | 20.30085 | C22orf26_ENSG00000182257;FLJ27365_ENSG00000197182;RP6-109B7.5_ENSG00000273289;RP6-109B7.3_ENSG00000241990 |
| 22 | 46450293 | 46451331 | KD2-H4K8ac_peak_20328 | 11.05467 | C22orf26_ENSG00000182257;FLJ27365_ENSG00000197182;RP6-109B7.3_ENSG00000241990                             |
| 22 | 46451593 | 46452221 | KD2-H4K8ac_peak_20329 | 14.70748 |                                                                                                           |
| 22 | 46454713 | 46455024 | KD2-H4K8ac_peak_20330 | 10.43145 | RP6-109B7.2_ENSG00000231010                                                                               |

|    |          |          |                       |          |                                                        |
|----|----------|----------|-----------------------|----------|--------------------------------------------------------|
| 22 | 46460141 | 46460490 | KD2-H4K8ac_peak_20331 | 12.25733 |                                                        |
| 22 | 46462544 | 46463107 | KD2-H4K8ac_peak_20332 | 9.63925  |                                                        |
| 22 | 46465151 | 46465347 | KD2-H4K8ac_peak_20333 | 8.83582  | RP6-109B7.4_ENSG00000235159                            |
| 22 | 46465985 | 46466885 | KD2-H4K8ac_peak_20334 | 22.25695 | RP6-109B7.4_ENSG00000235159                            |
| 22 | 46467244 | 46468535 | KD2-H4K8ac_peak_20335 | 10.86378 |                                                        |
| 22 | 46474900 | 46475112 | KD2-H4K8ac_peak_20336 | 4.44527  |                                                        |
| 22 | 46475503 | 46475700 | KD2-H4K8ac_peak_20337 | 5.81222  |                                                        |
| 22 | 46477383 | 46477672 | KD2-H4K8ac_peak_20338 | 11.00085 |                                                        |
| 22 | 46479987 | 46480444 | KD2-H4K8ac_peak_20339 | 5.92591  |                                                        |
| 22 | 46480665 | 46480915 | KD2-H4K8ac_peak_20340 | 8.4716   |                                                        |
| 22 | 46481207 | 46482441 | KD2-H4K8ac_peak_20341 | 8.4716   |                                                        |
| 22 | 46483373 | 46483688 | KD2-H4K8ac_peak_20342 | 4.52039  |                                                        |
| 22 | 46518653 | 46518885 | KD2-H4K8ac_peak_20343 | 6.97919  |                                                        |
| 22 | 46545850 | 46546106 | KD2-H4K8ac_peak_20344 | 8.85813  | PPARA_ENSG00000186951                                  |
| 22 | 46546795 | 46547198 | KD2-H4K8ac_peak_20345 | 9.36516  | PPARA_ENSG00000186951                                  |
| 22 | 46629169 | 46629449 | KD2-H4K8ac_peak_20346 | 7.10552  |                                                        |
| 22 | 46641431 | 46641784 | KD2-H4K8ac_peak_20347 | 4.33139  |                                                        |
| 22 | 46645731 | 46646844 | KD2-H4K8ac_peak_20348 | 14.43794 | CDPF1_ENSG00000205643                                  |
| 22 | 46663385 | 46663722 | KD2-H4K8ac_peak_20349 | 6.25869  | TTC38_ENSG00000075234                                  |
| 22 | 46663990 | 46664286 | KD2-H4K8ac_peak_20350 | 8.82366  | TTC38_ENSG00000075234                                  |
| 22 | 46692188 | 46692526 | KD2-H4K8ac_peak_20351 | 14.70748 | GTSE1_ENSG00000075218                                  |
| 22 | 46692858 | 46693328 | KD2-H4K8ac_peak_20352 | 8.30974  | GTSE1_ENSG00000075218                                  |
| 22 | 46731183 | 46732038 | KD2-H4K8ac_peak_20353 | 16.822   |                                                        |
| 22 | 46956853 | 46957153 | KD2-H4K8ac_peak_20354 | 11.75669 |                                                        |
| 22 | 46957629 | 46958035 | KD2-H4K8ac_peak_20355 | 8.90387  |                                                        |
| 22 | 46971729 | 46973662 | KD2-H4K8ac_peak_20356 | 22.21705 | GRAMD4_ENSG00000075240                                 |
| 22 | 46984060 | 46984521 | KD2-H4K8ac_peak_20357 | 4.42765  |                                                        |
| 22 | 46991537 | 46991888 | KD2-H4K8ac_peak_20358 | 8.53092  |                                                        |
| 22 | 47008414 | 47008637 | KD2-H4K8ac_peak_20359 | 5.08628  |                                                        |
| 22 | 47015369 | 47015703 | KD2-H4K8ac_peak_20360 | 5.20998  |                                                        |
| 22 | 47016019 | 47016845 | KD2-H4K8ac_peak_20361 | 14.69247 |                                                        |
| 22 | 47017589 | 47017834 | KD2-H4K8ac_peak_20362 | 5.98124  |                                                        |
| 22 | 47133515 | 47134100 | KD2-H4K8ac_peak_20363 | 13.73635 | CERK_ENSG00000100422                                   |
| 22 | 47134351 | 47134904 | KD2-H4K8ac_peak_20364 | 8.55271  | CERK_ENSG00000100422                                   |
| 22 | 47158572 | 47159108 | KD2-H4K8ac_peak_20365 | 13.95627 | CTA-29F11.1_ENSG00000260708;TBC1D22A_ENSG00000054611   |
| 22 | 48027538 | 48027873 | KD2-H4K8ac_peak_20366 | 7.47462  | LINC00898_ENSG00000205634;RP11-191L9.4_ENSG00000224271 |
| 22 | 49031101 | 49031296 | KD2-H4K8ac_peak_20367 | 6.16888  |                                                        |
| 22 | 49035823 | 49036137 | KD2-H4K8ac_peak_20368 | 8.1233   |                                                        |
| 22 | 49406909 | 49407856 | KD2-H4K8ac_peak_20369 | 8.94415  |                                                        |
| 22 | 49408138 | 49408427 | KD2-H4K8ac_peak_20370 | 11.70879 |                                                        |
| 22 | 49410377 | 49411677 | KD2-H4K8ac_peak_20371 | 7.27716  |                                                        |
| 22 | 49423207 | 49423440 | KD2-H4K8ac_peak_20372 | 9.36516  |                                                        |
| 22 | 49463731 | 49463961 | KD2-H4K8ac_peak_20373 | 10.34425 |                                                        |
| 22 | 49473035 | 49473647 | KD2-H4K8ac_peak_20374 | 6.56211  |                                                        |
| 22 | 49545709 | 49546486 | KD2-H4K8ac_peak_20375 | 8.30974  |                                                        |
| 22 | 49546793 | 49547476 | KD2-H4K8ac_peak_20376 | 7.47462  |                                                        |

|    |          |          |                       |          |                                                     |
|----|----------|----------|-----------------------|----------|-----------------------------------------------------|
| 22 | 49547964 | 49549033 | KD2-H4K8ac_peak_20377 | 15.06766 |                                                     |
| 22 | 50220633 | 50220997 | KD2-H4K8ac_peak_20378 | 7.146    | BRD1_ENSG00000100425                                |
| 22 | 50221598 | 50221956 | KD2-H4K8ac_peak_20379 | 19.11513 | BRD1_ENSG00000100425                                |
| 22 | 50243205 | 50243401 | KD2-H4K8ac_peak_20380 | 4.42765  |                                                     |
| 22 | 50246763 | 50247123 | KD2-H4K8ac_peak_20381 | 10.92268 | ZBED4_ENSG00000100426                               |
| 22 | 50312335 | 50312579 | KD2-H4K8ac_peak_20382 | 18.62998 | ALG12_ENSG00000182858;CRELD2_ENSG00000184164        |
| 22 | 50328681 | 50328989 | KD2-H4K8ac_peak_20383 | 13.03787 |                                                     |
| 22 | 50339661 | 50339926 | KD2-H4K8ac_peak_20384 | 7.47462  |                                                     |
| 22 | 50340827 | 50341038 | KD2-H4K8ac_peak_20385 | 4.73064  |                                                     |
| 22 | 50353592 | 50353932 | KD2-H4K8ac_peak_20386 | 17.75813 | PIM3_ENSG00000198355                                |
| 22 | 50354142 | 50354776 | KD2-H4K8ac_peak_20387 | 15.49029 | PIM3_ENSG00000198355                                |
| 22 | 50552952 | 50553473 | KD2-H4K8ac_peak_20388 | 10.63441 |                                                     |
| 22 | 50553991 | 50554425 | KD2-H4K8ac_peak_20389 | 8.66387  |                                                     |
| 22 | 50584329 | 50584629 | KD2-H4K8ac_peak_20390 | 5.08628  |                                                     |
| 22 | 50608195 | 50608426 | KD2-H4K8ac_peak_20391 | 13.5195  | PANX2_ENSG00000073150                               |
| 22 | 50623686 | 50624089 | KD2-H4K8ac_peak_20392 | 9.65086  | TRABD_ENSG00000170638                               |
| 22 | 50638496 | 50638736 | KD2-H4K8ac_peak_20393 | 5.51783  | RP3-402G11.26_ENSG00000273253;SELO_ENSG00000073169  |
| 22 | 50638955 | 50639220 | KD2-H4K8ac_peak_20394 | 16.88883 | RP3-402G11.26_ENSG00000273253;SELO_ENSG00000073169  |
| 22 | 50639461 | 50640205 | KD2-H4K8ac_peak_20395 | 10.86378 | RP3-402G11.26_ENSG00000273253;SELO_ENSG00000073169  |
| 22 | 50689250 | 50690234 | KD2-H4K8ac_peak_20396 | 15.40891 | HDAC10_ENSG00000100429                              |
| 22 | 50698923 | 50700329 | KD2-H4K8ac_peak_20397 | 10.05606 | MAPK12_ENSG00000188130                              |
| 22 | 50708170 | 50708441 | KD2-H4K8ac_peak_20398 | 8.55271  | MAPK11_ENSG00000185386                              |
| 22 | 50708918 | 50710147 | KD2-H4K8ac_peak_20399 | 10.66719 | MAPK11_ENSG00000185386                              |
| 22 | 50710535 | 50710772 | KD2-H4K8ac_peak_20400 | 13.09607 |                                                     |
| 22 | 50746427 | 50746773 | KD2-H4K8ac_peak_20401 | 8.4716   | PLXNB2_ENSG00000196576                              |
| 22 | 50765625 | 50766492 | KD2-H4K8ac_peak_20402 | 18.39704 | DENND6B_ENSG00000205593                             |
| 22 | 50781188 | 50781427 | KD2-H4K8ac_peak_20403 | 7.96322  | PPP6R2_ENSG00000100239                              |
| 22 | 50781788 | 50782049 | KD2-H4K8ac_peak_20404 | 19.72117 | PPP6R2_ENSG00000100239                              |
| 22 | 50913696 | 50914093 | KD2-H4K8ac_peak_20405 | 9.41619  | SBF1_ENSG00000100241                                |
| 22 | 50919707 | 50920825 | KD2-H4K8ac_peak_20406 | 9.78882  | ADM2_ENSG00000128165                                |
| 22 | 50945771 | 50946009 | KD2-H4K8ac_peak_20407 | 7.47462  | LMF2_ENSG00000100258;NCAPH2_ENSG00000025770         |
| 22 | 50946671 | 50946894 | KD2-H4K8ac_peak_20408 | 19.1048  | LMF2_ENSG00000100258;NCAPH2_ENSG00000025770         |
| 22 | 50963501 | 50963935 | KD2-H4K8ac_peak_20409 | 6.84261  | SCO2_ENSG00000130489                                |
| 22 | 50964237 | 50965357 | KD2-H4K8ac_peak_20410 | 12.82393 | SCO2_ENSG00000130489                                |
| 22 | 50969792 | 50970006 | KD2-H4K8ac_peak_20411 | 6.99194  |                                                     |
| 22 | 50970313 | 50971123 | KD2-H4K8ac_peak_20412 | 9.95119  | ODF3B_ENSG00000177989                               |
| 22 | 51020625 | 51021210 | KD2-H4K8ac_peak_20413 | 9.26408  | CHKB-CPT1B_ENSG00000254413;CHKB-AS1_ENSG00000205559 |
| 22 | 51066090 | 51066495 | KD2-H4K8ac_peak_20414 | 5.9696   | ARSA_ENSG00000100299                                |
| 22 | 51194892 | 51195099 | KD2-H4K8ac_peak_20415 | 7.01964  | RPL23AP82_ENSG00000184319                           |
| 22 | 51195368 | 51195623 | KD2-H4K8ac_peak_20416 | 8.59579  | RPL23AP82_ENSG00000184319                           |
| 3  | 238925   | 240173   | KD2-H4K8ac_peak_20417 | 10.0746  | CHL1-AS2_ENSG00000224318;CHL1_ENSG00000134121       |
| 3  | 334362   | 334634   | KD2-H4K8ac_peak_20418 | 5.15777  |                                                     |
| 3  | 2342367  | 2342564  | KD2-H4K8ac_peak_20419 | 6.40683  |                                                     |
| 3  | 2458196  | 2458639  | KD2-H4K8ac_peak_20420 | 9.63487  |                                                     |
| 3  | 2492444  | 2492651  | KD2-H4K8ac_peak_20421 | 7.12754  |                                                     |
| 3  | 2552591  | 2553374  | KD2-H4K8ac_peak_20422 | 12.26331 |                                                     |



|   |         |         |                       |          |                                                                             |
|---|---------|---------|-----------------------|----------|-----------------------------------------------------------------------------|
| 3 | 3168275 | 3168470 | KD2-H4K8ac_peak_20423 | 10.19949 | IL5RA_ENSG00000091181;TRNT1_ENSG00000072756                                 |
| 3 | 3168959 | 3169162 | KD2-H4K8ac_peak_20424 | 6.13909  | IL5RA_ENSG00000091181;TRNT1_ENSG00000072756                                 |
| 3 | 3840376 | 3840758 | KD2-H4K8ac_peak_20425 | 20.76534 | LRRN1_ENSG00000175928                                                       |
| 3 | 3841147 | 3841593 | KD2-H4K8ac_peak_20426 | 6.40683  | LRRN1_ENSG00000175928                                                       |
| 3 | 3842572 | 3842772 | KD2-H4K8ac_peak_20427 | 4.42765  |                                                                             |
| 3 | 4345030 | 4345716 | KD2-H4K8ac_peak_20428 | 10.87093 | SETMAR_ENSG00000170364                                                      |
| 3 | 4345976 | 4346286 | KD2-H4K8ac_peak_20429 | 7.27716  | SETMAR_ENSG00000170364                                                      |
| 3 | 4508508 | 4509456 | KD2-H4K8ac_peak_20430 | 9.11031  | SUMF1_ENSG00000144455                                                       |
| 3 | 4534557 | 4534761 | KD2-H4K8ac_peak_20431 | 7.95563  | ITPR1-AS1_ENSG00000231249;ITPR1_ENSG00000150995                             |
| 3 | 4544280 | 4544562 | KD2-H4K8ac_peak_20432 | 4.86324  |                                                                             |
| 3 | 4547027 | 4547254 | KD2-H4K8ac_peak_20433 | 8.83582  |                                                                             |
| 3 | 4549415 | 4549657 | KD2-H4K8ac_peak_20434 | 6.31143  |                                                                             |
| 3 | 4550295 | 4550598 | KD2-H4K8ac_peak_20435 | 5.29352  |                                                                             |
| 3 | 4551464 | 4551749 | KD2-H4K8ac_peak_20436 | 6.00226  |                                                                             |
| 3 | 4552578 | 4553365 | KD2-H4K8ac_peak_20437 | 5.88845  |                                                                             |
| 3 | 4553609 | 4554139 | KD2-H4K8ac_peak_20438 | 13.03344 |                                                                             |
| 3 | 4555374 | 4555821 | KD2-H4K8ac_peak_20439 | 15.5861  |                                                                             |
| 3 | 4564570 | 4564940 | KD2-H4K8ac_peak_20440 | 5.25667  |                                                                             |
| 3 | 4572785 | 4573218 | KD2-H4K8ac_peak_20441 | 7.27716  |                                                                             |
| 3 | 4574933 | 4575426 | KD2-H4K8ac_peak_20442 | 6.83936  |                                                                             |
| 3 | 4757224 | 4757473 | KD2-H4K8ac_peak_20443 | 5.15777  |                                                                             |
| 3 | 4910315 | 4910854 | KD2-H4K8ac_peak_20444 | 11.58876 |                                                                             |
| 3 | 5067911 | 5068126 | KD2-H4K8ac_peak_20445 | 10.53377 |                                                                             |
| 3 | 5069040 | 5069654 | KD2-H4K8ac_peak_20446 | 8.1233   |                                                                             |
| 3 | 5163981 | 5164366 | KD2-H4K8ac_peak_20447 | 15.81711 | ARL8B_ENSG00000134108                                                       |
| 3 | 5229506 | 5229786 | KD2-H4K8ac_peak_20448 | 6.52179  | AC026202.3_ENSG00000233912;AC026202.1_ENSG00000268509;EDEM1_ENSG00000134109 |
| 3 | 5292817 | 5293062 | KD2-H4K8ac_peak_20449 | 6.16888  | MIR4790_ENSG00000265180                                                     |
| 3 | 6902318 | 6902577 | KD2-H4K8ac_peak_20450 | 9.1707   |                                                                             |
| 3 | 6908438 | 6908734 | KD2-H4K8ac_peak_20451 | 4.76709  |                                                                             |
| 3 | 8570956 | 8571210 | KD2-H4K8ac_peak_20452 | 4.59928  |                                                                             |
| 3 | 8571603 | 8572227 | KD2-H4K8ac_peak_20453 | 6.0073   |                                                                             |
| 3 | 8596102 | 8596792 | KD2-H4K8ac_peak_20454 | 15.99047 |                                                                             |
| 3 | 8597044 | 8597264 | KD2-H4K8ac_peak_20455 | 8.94469  |                                                                             |
| 3 | 8598347 | 8598624 | KD2-H4K8ac_peak_20456 | 7.167    |                                                                             |
| 3 | 8665052 | 8665371 | KD2-H4K8ac_peak_20457 | 7.07117  |                                                                             |
| 3 | 8690504 | 8691927 | KD2-H4K8ac_peak_20458 | 17.51891 |                                                                             |
| 3 | 8693400 | 8694317 | KD2-H4K8ac_peak_20459 | 8.53092  |                                                                             |
| 3 | 8694596 | 8694807 | KD2-H4K8ac_peak_20460 | 6.8108   |                                                                             |
| 3 | 8699388 | 8700332 | KD2-H4K8ac_peak_20461 | 22.9953  |                                                                             |
| 3 | 8701015 | 8701386 | KD2-H4K8ac_peak_20462 | 14.70804 |                                                                             |
| 3 | 8703788 | 8704164 | KD2-H4K8ac_peak_20463 | 6.66692  |                                                                             |
| 3 | 8706132 | 8706329 | KD2-H4K8ac_peak_20464 | 5.57044  |                                                                             |
| 3 | 8717401 | 8717624 | KD2-H4K8ac_peak_20465 | 4.44923  |                                                                             |
| 3 | 8810831 | 8811121 | KD2-H4K8ac_peak_20466 | 7.96322  | OXTR_ENSG00000180914                                                        |
| 3 | 8826720 | 8826952 | KD2-H4K8ac_peak_20467 | 8.94469  |                                                                             |
| 3 | 8827364 | 8827642 | KD2-H4K8ac_peak_20468 | 4.86824  |                                                                             |

|   |          |          |                       |          |                                                                             |
|---|----------|----------|-----------------------|----------|-----------------------------------------------------------------------------|
| 3 | 8834506  | 8834864  | KD2-H4K8ac_peak_20469 | 9.6247   |                                                                             |
| 3 | 9143822  | 9144264  | KD2-H4K8ac_peak_20470 | 4.211    |                                                                             |
| 3 | 9244022  | 9244547  | KD2-H4K8ac_peak_20471 | 12.42761 |                                                                             |
| 3 | 9259448  | 9259697  | KD2-H4K8ac_peak_20472 | 7.70289  | SRGAP3-AS3_ENSG00000227929                                                  |
| 3 | 9404408  | 9404970  | KD2-H4K8ac_peak_20473 | 10.19949 | SRGAP3_ENSG00000196220;RP11-380O24.1_ENSG00000254485;THUMP3_ENSG00000134077 |
| 3 | 9438004  | 9438432  | KD2-H4K8ac_peak_20474 | 5.51783  | SETD5_ENSG00000168137                                                       |
| 3 | 9439640  | 9439938  | KD2-H4K8ac_peak_20475 | 6.65673  | SETD5-AS1_ENSG00000206573;SETD5_ENSG00000168137                             |
| 3 | 9595988  | 9596231  | KD2-H4K8ac_peak_20476 | 4.8888   | LHFPL4_ENSG00000156959                                                      |
| 3 | 9772427  | 9772827  | KD2-H4K8ac_peak_20477 | 5.54647  | BRPF1_ENSG00000156983                                                       |
| 3 | 9773220  | 9773821  | KD2-H4K8ac_peak_20478 | 12.36441 | BRPF1_ENSG00000156983                                                       |
| 3 | 9791169  | 9791390  | KD2-H4K8ac_peak_20479 | 5.13615  | OGG1_ENSG00000114026                                                        |
| 3 | 9807423  | 9807655  | KD2-H4K8ac_peak_20480 | 5.90098  |                                                                             |
| 3 | 9811238  | 9811583  | KD2-H4K8ac_peak_20481 | 9.63487  | CAMK1_ENSG00000134072                                                       |
| 3 | 9811868  | 9812267  | KD2-H4K8ac_peak_20482 | 11.79585 | CAMK1_ENSG00000134072                                                       |
| 3 | 9833801  | 9834565  | KD2-H4K8ac_peak_20483 | 23.67389 | TADA3_ENSG00000171148;ARPC4_ENSG00000241553;ARPC4-TTLL3_ENSG00000250151     |
| 3 | 9851361  | 9852705  | KD2-H4K8ac_peak_20484 | 16.40694 |                                                                             |
| 3 | 9885136  | 9885569  | KD2-H4K8ac_peak_20485 | 4.54006  | RPUSD3_ENSG00000156990                                                      |
| 3 | 9906921  | 9907120  | KD2-H4K8ac_peak_20486 | 4.01115  |                                                                             |
| 3 | 9913167  | 9913377  | KD2-H4K8ac_peak_20487 | 4.70206  |                                                                             |
| 3 | 9931673  | 9932034  | KD2-H4K8ac_peak_20488 | 7.8711   | JAGN1_ENSG00000171135                                                       |
| 3 | 9932330  | 9932869  | KD2-H4K8ac_peak_20489 | 11.80283 | JAGN1_ENSG00000171135                                                       |
| 3 | 9955458  | 9955822  | KD2-H4K8ac_peak_20490 | 7.14562  |                                                                             |
| 3 | 9956890  | 9957869  | KD2-H4K8ac_peak_20491 | 16.8471  | IL17RC_ENSG00000163702                                                      |
| 3 | 9958925  | 9959233  | KD2-H4K8ac_peak_20492 | 5.9696   | IL17RC_ENSG00000163702                                                      |
| 3 | 9974154  | 9975248  | KD2-H4K8ac_peak_20493 | 11.89502 | CRELD1_ENSG00000163703                                                      |
| 3 | 9987675  | 9988054  | KD2-H4K8ac_peak_20494 | 5.54647  |                                                                             |
| 3 | 10028117 | 10028473 | KD2-H4K8ac_peak_20495 | 5.9696   | EMC3-AS1_ENSG00000180385                                                    |
| 3 | 10052434 | 10052743 | KD2-H4K8ac_peak_20496 | 8.23274  | EMC3_ENSG00000125037;AC022007.5_ENSG00000206567                             |
| 3 | 10067628 | 10068676 | KD2-H4K8ac_peak_20497 | 6.40683  | CIDECP_ENSG00000186162;FANCD2_ENSG00000144554                               |
| 3 | 10156430 | 10156833 | KD2-H4K8ac_peak_20498 | 6.99815  | BRK1_ENSG00000254999                                                        |
| 3 | 10157509 | 10157716 | KD2-H4K8ac_peak_20499 | 6.99815  | BRK1_ENSG00000254999                                                        |
| 3 | 10182940 | 10183923 | KD2-H4K8ac_peak_20500 | 16.8435  | VHL_ENSG00000134086;snoU13_ENSG00000238345                                  |
| 3 | 10206649 | 10206928 | KD2-H4K8ac_peak_20501 | 6.06203  | IRAK2_ENSG00000134070                                                       |
| 3 | 10276193 | 10276507 | KD2-H4K8ac_peak_20502 | 8.17902  |                                                                             |
| 3 | 10362514 | 10362786 | KD2-H4K8ac_peak_20503 | 11.05407 | SEC13_ENSG00000157020                                                       |
| 3 | 10396421 | 10396700 | KD2-H4K8ac_peak_20504 | 6.56211  |                                                                             |
| 3 | 10546521 | 10546870 | KD2-H4K8ac_peak_20505 | 7.146    |                                                                             |
| 3 | 10857498 | 10858499 | KD2-H4K8ac_peak_20506 | 9.95119  | SLC6A11_ENSG00000132164                                                     |
| 3 | 10968301 | 10969698 | KD2-H4K8ac_peak_20507 | 11.66477 |                                                                             |
| 3 | 10969976 | 10970263 | KD2-H4K8ac_peak_20508 | 6.00226  |                                                                             |
| 3 | 10970611 | 10971027 | KD2-H4K8ac_peak_20509 | 8.09472  |                                                                             |
| 3 | 11033403 | 11033850 | KD2-H4K8ac_peak_20510 | 9.1707   | SLC6A1_ENSG00000157103                                                      |
| 3 | 11138529 | 11138841 | KD2-H4K8ac_peak_20511 | 6.12046  |                                                                             |
| 3 | 11237796 | 11238070 | KD2-H4K8ac_peak_20512 | 8.00457  |                                                                             |
| 3 | 11314095 | 11314442 | KD2-H4K8ac_peak_20513 | 28.28058 | ATG7_ENSG00000197548                                                        |
| 3 | 11489703 | 11489916 | KD2-H4K8ac_peak_20514 | 4.01115  |                                                                             |

|   |          |          |                       |          |                                                   |
|---|----------|----------|-----------------------|----------|---------------------------------------------------|
| 3 | 11680662 | 11680876 | KD2-H4K8ac_peak_20515 | 5.29555  |                                                   |
| 3 | 11684118 | 11684481 | KD2-H4K8ac_peak_20516 | 13.70753 |                                                   |
| 3 | 11684690 | 11684891 | KD2-H4K8ac_peak_20517 | 9.1707   |                                                   |
| 3 | 11760519 | 11760995 | KD2-H4K8ac_peak_20518 | 9.1707   |                                                   |
| 3 | 11812343 | 11812717 | KD2-H4K8ac_peak_20519 | 4.0528   |                                                   |
| 3 | 11888041 | 11888314 | KD2-H4K8ac_peak_20520 | 4.42765  | TAMM41_ENSG00000144559                            |
| 3 | 11996591 | 11996962 | KD2-H4K8ac_peak_20521 | 6.16888  |                                                   |
| 3 | 12222018 | 12222252 | KD2-H4K8ac_peak_20522 | 4.7849   |                                                   |
| 3 | 12521165 | 12521395 | KD2-H4K8ac_peak_20523 | 6.60096  |                                                   |
| 3 | 12521599 | 12521937 | KD2-H4K8ac_peak_20524 | 9.57101  |                                                   |
| 3 | 12525308 | 12525692 | KD2-H4K8ac_peak_20525 | 12.99417 | TSEN2_ENSG00000154743                             |
| 3 | 12526085 | 12526348 | KD2-H4K8ac_peak_20526 | 3.86308  | TSEN2_ENSG00000154743                             |
| 3 | 12595463 | 12595873 | KD2-H4K8ac_peak_20527 | 11.05407 |                                                   |
| 3 | 12597181 | 12597514 | KD2-H4K8ac_peak_20528 | 8.28994  | MKRN2_ENSG00000075975                             |
| 3 | 12597838 | 12598392 | KD2-H4K8ac_peak_20529 | 12.00597 | MKRN2_ENSG00000075975                             |
| 3 | 12705073 | 12705587 | KD2-H4K8ac_peak_20530 | 15.76765 | RAF1_ENSG00000132155                              |
| 3 | 12706413 | 12706684 | KD2-H4K8ac_peak_20531 | 4.42765  | RAF1_ENSG00000132155                              |
| 3 | 12837676 | 12838582 | KD2-H4K8ac_peak_20532 | 16.822   | CAND2_ENSG00000144712                             |
| 3 | 12858632 | 12859119 | KD2-H4K8ac_peak_20533 | 10.29344 |                                                   |
| 3 | 12882491 | 12882998 | KD2-H4K8ac_peak_20534 | 12.84642 | RPL32_ENSG00000144713;SNORA7A_ENSG00000207496     |
| 3 | 12917402 | 12917680 | KD2-H4K8ac_peak_20535 | 14.69247 |                                                   |
| 3 | 12964721 | 12964938 | KD2-H4K8ac_peak_20536 | 4.66652  |                                                   |
| 3 | 12996648 | 12996856 | KD2-H4K8ac_peak_20537 | 5.85704  |                                                   |
| 3 | 13009517 | 13009822 | KD2-H4K8ac_peak_20538 | 6.14031  |                                                   |
| 3 | 13063499 | 13063883 | KD2-H4K8ac_peak_20539 | 11.76021 |                                                   |
| 3 | 13064283 | 13064759 | KD2-H4K8ac_peak_20540 | 7.36799  |                                                   |
| 3 | 13064966 | 13065329 | KD2-H4K8ac_peak_20541 | 4.211    |                                                   |
| 3 | 13082024 | 13082326 | KD2-H4K8ac_peak_20542 | 6.25869  |                                                   |
| 3 | 13083058 | 13083868 | KD2-H4K8ac_peak_20543 | 12.74171 |                                                   |
| 3 | 13284992 | 13285264 | KD2-H4K8ac_peak_20544 | 9.08816  |                                                   |
| 3 | 13302091 | 13302345 | KD2-H4K8ac_peak_20545 | 5.94347  |                                                   |
| 3 | 13338311 | 13338552 | KD2-H4K8ac_peak_20546 | 4.211    |                                                   |
| 3 | 13461138 | 13461668 | KD2-H4K8ac_peak_20547 | 13.77586 | NUP210_ENSG00000132182                            |
| 3 | 13461881 | 13462487 | KD2-H4K8ac_peak_20548 | 17.94825 | NUP210_ENSG00000132182                            |
| 3 | 13493506 | 13493938 | KD2-H4K8ac_peak_20549 | 9.06369  |                                                   |
| 3 | 13494152 | 13494355 | KD2-H4K8ac_peak_20550 | 6.31143  |                                                   |
| 3 | 13521009 | 13521540 | KD2-H4K8ac_peak_20551 | 13.35993 | HDAC11-AS1_ENSG00000244502;HDAC11_ENSG00000163517 |
| 3 | 13521965 | 13522185 | KD2-H4K8ac_peak_20552 | 5.92591  | HDAC11-AS1_ENSG00000244502;HDAC11_ENSG00000163517 |
| 3 | 13526363 | 13526577 | KD2-H4K8ac_peak_20553 | 6.99815  |                                                   |
| 3 | 13554562 | 13554852 | KD2-H4K8ac_peak_20554 | 6.65673  |                                                   |
| 3 | 13560798 | 13561045 | KD2-H4K8ac_peak_20555 | 5.32933  |                                                   |
| 3 | 13590234 | 13590487 | KD2-H4K8ac_peak_20556 | 12.00273 |                                                   |
| 3 | 13590713 | 13591004 | KD2-H4K8ac_peak_20557 | 14.38358 |                                                   |
| 3 | 13606144 | 13606540 | KD2-H4K8ac_peak_20558 | 4.86324  |                                                   |
| 3 | 13610294 | 13610977 | KD2-H4K8ac_peak_20559 | 5.54647  |                                                   |
| 3 | 13615478 | 13615939 | KD2-H4K8ac_peak_20560 | 11.92978 |                                                   |

|   |          |          |                       |          |                                                |
|---|----------|----------|-----------------------|----------|------------------------------------------------|
| 3 | 13616166 | 13617224 | KD2-H4K8ac_peak_20561 | 11.89502 |                                                |
| 3 | 13624906 | 13625430 | KD2-H4K8ac_peak_20562 | 5.52329  |                                                |
| 3 | 13696547 | 13696831 | KD2-H4K8ac_peak_20563 | 5.9696   |                                                |
| 3 | 13824319 | 13824585 | KD2-H4K8ac_peak_20564 | 9.59147  |                                                |
| 3 | 13936212 | 13936894 | KD2-H4K8ac_peak_20565 | 16.05022 |                                                |
| 3 | 14165162 | 14166180 | KD2-H4K8ac_peak_20566 | 18.29344 | CHCHD4_ENSG00000163528;TMEM43_ENSG00000170876  |
| 3 | 14219691 | 14220008 | KD2-H4K8ac_peak_20567 | 8.4716   | XPC_ENSG00000154767;LSM3_ENSG00000170860       |
| 3 | 14257226 | 14257664 | KD2-H4K8ac_peak_20568 | 4.59928  |                                                |
| 3 | 14382753 | 14383102 | KD2-H4K8ac_peak_20569 | 4.211    |                                                |
| 3 | 14443534 | 14443855 | KD2-H4K8ac_peak_20570 | 14.06758 | SLC6A6_ENSG00000131389                         |
| 3 | 14480525 | 14480788 | KD2-H4K8ac_peak_20571 | 8.16133  |                                                |
| 3 | 14481748 | 14482003 | KD2-H4K8ac_peak_20572 | 6.16747  |                                                |
| 3 | 14576314 | 14576508 | KD2-H4K8ac_peak_20573 | 5.71749  |                                                |
| 3 | 14581414 | 14581904 | KD2-H4K8ac_peak_20574 | 10.08707 |                                                |
| 3 | 14582390 | 14582902 | KD2-H4K8ac_peak_20575 | 4.67342  | GRIP2_ENSG00000144596                          |
| 3 | 14644041 | 14644466 | KD2-H4K8ac_peak_20576 | 7.76329  |                                                |
| 3 | 14692438 | 14692776 | KD2-H4K8ac_peak_20577 | 8.04763  | CCDC174_ENSG00000154781                        |
| 3 | 14988716 | 14988952 | KD2-H4K8ac_peak_20578 | 7.76329  | FGD5-AS1_ENSG00000225733;NR2C2_ENSG00000177463 |
| 3 | 15064410 | 15064753 | KD2-H4K8ac_peak_20579 | 5.49367  |                                                |
| 3 | 15106401 | 15106747 | KD2-H4K8ac_peak_20580 | 4.44527  | MRPS25_ENSG00000131368                         |
| 3 | 15140385 | 15140628 | KD2-H4K8ac_peak_20581 | 16.1002  | ZFYVE20_ENSG00000131381                        |
| 3 | 15140847 | 15141047 | KD2-H4K8ac_peak_20582 | 9.16531  | ZFYVE20_ENSG00000131381                        |
| 3 | 15247782 | 15248120 | KD2-H4K8ac_peak_20583 | 6.65673  | COL6A4P1_ENSG00000230524;CAPN7_ENSG00000131375 |
| 3 | 15373685 | 15373907 | KD2-H4K8ac_peak_20584 | 5.80191  |                                                |
| 3 | 15374196 | 15374431 | KD2-H4K8ac_peak_20585 | 8.53092  |                                                |
| 3 | 15403382 | 15403590 | KD2-H4K8ac_peak_20586 | 4.66652  |                                                |
| 3 | 15468614 | 15469408 | KD2-H4K8ac_peak_20587 | 13.80019 | EAF1_ENSG00000144597                           |
| 3 | 15502950 | 15503341 | KD2-H4K8ac_peak_20588 | 3.75035  |                                                |
| 3 | 15642608 | 15643001 | KD2-H4K8ac_peak_20589 | 8.55271  | HACL1_ENSG00000131373;BTD_ENSG00000169814      |
| 3 | 15901597 | 15902334 | KD2-H4K8ac_peak_20590 | 14.45402 | ANKRD28_ENSG00000206560                        |
| 3 | 16508952 | 16509530 | KD2-H4K8ac_peak_20591 | 12.05219 |                                                |
| 3 | 16510922 | 16511340 | KD2-H4K8ac_peak_20592 | 8.85813  |                                                |
| 3 | 16551223 | 16551706 | KD2-H4K8ac_peak_20593 | 8.4627   |                                                |
| 3 | 16553545 | 16553775 | KD2-H4K8ac_peak_20594 | 5.30799  |                                                |
| 3 | 16554044 | 16555010 | KD2-H4K8ac_peak_20595 | 9.01262  | RFTN1_ENSG00000131378                          |
| 3 | 16555255 | 16555589 | KD2-H4K8ac_peak_20596 | 8.16906  | RFTN1_ENSG00000131378                          |
| 3 | 16557757 | 16558096 | KD2-H4K8ac_peak_20597 | 8.55271  |                                                |
| 3 | 16559518 | 16560025 | KD2-H4K8ac_peak_20598 | 6.33462  |                                                |
| 3 | 16561415 | 16561755 | KD2-H4K8ac_peak_20599 | 7.27716  |                                                |
| 3 | 16592485 | 16592783 | KD2-H4K8ac_peak_20600 | 11.89502 |                                                |
| 3 | 16925877 | 16926320 | KD2-H4K8ac_peak_20601 | 20.8593  |                                                |
| 3 | 17783463 | 17784036 | KD2-H4K8ac_peak_20602 | 16.822   |                                                |
| 3 | 18155092 | 18155755 | KD2-H4K8ac_peak_20603 | 7.27716  |                                                |
| 3 | 18167289 | 18167629 | KD2-H4K8ac_peak_20604 | 5.57044  |                                                |
| 3 | 18168659 | 18169060 | KD2-H4K8ac_peak_20605 | 12.06346 |                                                |
| 3 | 18169922 | 18170295 | KD2-H4K8ac_peak_20606 | 5.73839  |                                                |

|   |          |          |                       |          |                                                   |
|---|----------|----------|-----------------------|----------|---------------------------------------------------|
| 3 | 18180486 | 18180980 | KD2-H4K8ac_peak_20607 | 7.01964  |                                                   |
| 3 | 18465485 | 18465679 | KD2-H4K8ac_peak_20608 | 6.83936  |                                                   |
| 3 | 18467149 | 18467663 | KD2-H4K8ac_peak_20609 | 11.05407 |                                                   |
| 3 | 19188718 | 19188980 | KD2-H4K8ac_peak_20610 | 10.53377 | KCNH8_ENSG00000183960                             |
| 3 | 19189190 | 19190115 | KD2-H4K8ac_peak_20611 | 8.55271  | KCNH8_ENSG00000183960                             |
| 3 | 19275963 | 19276361 | KD2-H4K8ac_peak_20612 | 10.05606 |                                                   |
| 3 | 19987578 | 19988298 | KD2-H4K8ac_peak_20613 | 4.42765  | EFHB_ENSG00000163576;RAB5A_ENSG00000144566        |
| 3 | 19988748 | 19989204 | KD2-H4K8ac_peak_20614 | 6.76298  | EFHB_ENSG00000163576;RAB5A_ENSG00000144566        |
| 3 | 20065268 | 20065462 | KD2-H4K8ac_peak_20615 | 4.3015   |                                                   |
| 3 | 20081283 | 20081660 | KD2-H4K8ac_peak_20616 | 5.29555  | KAT2B_ENSG00000114166                             |
| 3 | 20589501 | 20589705 | KD2-H4K8ac_peak_20617 | 5.16439  |                                                   |
| 3 | 22492935 | 22493162 | KD2-H4K8ac_peak_20618 | 8.17902  |                                                   |
| 3 | 23244703 | 23245010 | KD2-H4K8ac_peak_20619 | 10.96455 | UBE2E2-AS1_ENSG00000233153;UBE2E2_ENSG00000182247 |
| 3 | 23804816 | 23805339 | KD2-H4K8ac_peak_20620 | 4.211    |                                                   |
| 3 | 23847604 | 23848707 | KD2-H4K8ac_peak_20621 | 12.84642 | UBE2E1-AS1_ENSG00000223791;UBE2E1_ENSG00000170142 |
| 3 | 23851955 | 23852592 | KD2-H4K8ac_peak_20622 | 11.90231 |                                                   |
| 3 | 23958694 | 23959078 | KD2-H4K8ac_peak_20623 | 4.91674  | RPL15_ENSG00000174748                             |
| 3 | 23986339 | 23986539 | KD2-H4K8ac_peak_20624 | 11.89502 | NR1D2_ENSG00000174738                             |
| 3 | 24034656 | 24034882 | KD2-H4K8ac_peak_20625 | 4.42765  |                                                   |
| 3 | 24536382 | 24536677 | KD2-H4K8ac_peak_20626 | 6.66692  | THRB_ENSG00000151090;THRB-AS1_ENSG00000228791     |
| 3 | 24562780 | 24563823 | KD2-H4K8ac_peak_20627 | 8.10216  | MIR4792_ENSG00000265028                           |
| 3 | 25469236 | 25469560 | KD2-H4K8ac_peak_20628 | 9.11031  |                                                   |
| 3 | 25469791 | 25469989 | KD2-H4K8ac_peak_20629 | 12.06346 |                                                   |
| 3 | 25494295 | 25494502 | KD2-H4K8ac_peak_20630 | 5.40638  |                                                   |
| 3 | 25495097 | 25495391 | KD2-H4K8ac_peak_20631 | 6.09229  |                                                   |
| 3 | 25496820 | 25497233 | KD2-H4K8ac_peak_20632 | 6.44277  |                                                   |
| 3 | 25510297 | 25510673 | KD2-H4K8ac_peak_20633 | 4.77079  |                                                   |
| 3 | 25515053 | 25515265 | KD2-H4K8ac_peak_20634 | 7.12754  |                                                   |
| 3 | 25705676 | 25706327 | KD2-H4K8ac_peak_20635 | 14.98671 | TOP2B_ENSG00000077097;MIR4442_ENSG00000264219     |
| 3 | 25706708 | 25706933 | KD2-H4K8ac_peak_20636 | 4.9025   | TOP2B_ENSG00000077097;MIR4442_ENSG00000264219     |
| 3 | 25825165 | 25825414 | KD2-H4K8ac_peak_20637 | 5.88845  | OXSM_ENSG00000151093                              |
| 3 | 25831851 | 25832062 | KD2-H4K8ac_peak_20638 | 6.0073   |                                                   |
| 3 | 27167091 | 27167489 | KD2-H4K8ac_peak_20639 | 9.15329  |                                                   |
| 3 | 27525075 | 27525830 | KD2-H4K8ac_peak_20640 | 8.26945  | SLC4A7_ENSG000000033867                           |
| 3 | 27526220 | 27526489 | KD2-H4K8ac_peak_20641 | 12.42547 | SLC4A7_ENSG000000033867                           |
| 3 | 27601829 | 27602069 | KD2-H4K8ac_peak_20642 | 8.00457  |                                                   |
| 3 | 27673990 | 27674879 | KD2-H4K8ac_peak_20643 | 15.9336  | AC098614.2_ENSG00000213846                        |
| 3 | 27770281 | 27770514 | KD2-H4K8ac_peak_20644 | 4.42765  |                                                   |
| 3 | 28007426 | 28007877 | KD2-H4K8ac_peak_20645 | 7.12754  |                                                   |
| 3 | 28283158 | 28283482 | KD2-H4K8ac_peak_20646 | 21.26856 | CMC1_ENSG00000187118                              |
| 3 | 28390122 | 28390535 | KD2-H4K8ac_peak_20647 | 6.40874  | AZI2_ENSG00000163512;ZCWPW2_ENSG00000206559       |
| 3 | 28616763 | 28617210 | KD2-H4K8ac_peak_20648 | 11.43863 | LINC00693_ENSG00000228214                         |
| 3 | 28617425 | 28617636 | KD2-H4K8ac_peak_20649 | 5.4779   |                                                   |
| 3 | 28686535 | 28686762 | KD2-H4K8ac_peak_20650 | 6.16888  |                                                   |
| 3 | 28886475 | 28886714 | KD2-H4K8ac_peak_20651 | 4.86324  |                                                   |
| 3 | 28958445 | 28958654 | KD2-H4K8ac_peak_20652 | 7.27716  |                                                   |

|   |          |          |                       |          |                                                    |
|---|----------|----------|-----------------------|----------|----------------------------------------------------|
| 3 | 29322135 | 29322602 | KD2-H4K8ac_peak_20653 | 7.27716  | RBMS3_ENSG00000144642                              |
| 3 | 29327151 | 29327500 | KD2-H4K8ac_peak_20654 | 5.54647  |                                                    |
| 3 | 29425665 | 29425883 | KD2-H4K8ac_peak_20655 | 8.1233   |                                                    |
| 3 | 29495060 | 29495353 | KD2-H4K8ac_peak_20656 | 6.65673  |                                                    |
| 3 | 29566398 | 29566596 | KD2-H4K8ac_peak_20657 | 6.07178  |                                                    |
| 3 | 29683266 | 29683789 | KD2-H4K8ac_peak_20658 | 13.57066 | RBMS3-AS2_ENSG00000203506                          |
| 3 | 29691846 | 29692038 | KD2-H4K8ac_peak_20659 | 9.15329  |                                                    |
| 3 | 30647982 | 30648629 | KD2-H4K8ac_peak_20660 | 9.90914  | TGFBR2_ENSG00000163513                             |
| 3 | 30723077 | 30723636 | KD2-H4K8ac_peak_20661 | 4.95402  |                                                    |
| 3 | 31574164 | 31574369 | KD2-H4K8ac_peak_20662 | 8.1235   | STT3B_ENSG00000163527                              |
| 3 | 31789448 | 31789679 | KD2-H4K8ac_peak_20663 | 7.75499  |                                                    |
| 3 | 32147529 | 32147862 | KD2-H4K8ac_peak_20664 | 10.17341 | GPD1L_ENSG00000152642                              |
| 3 | 32148281 | 32148539 | KD2-H4K8ac_peak_20665 | 4.86324  |                                                    |
| 3 | 32280474 | 32280716 | KD2-H4K8ac_peak_20666 | 6.97919  | RP11-384L8.1_ENSG00000261572;CMTM8_ENSG00000170293 |
| 3 | 32433503 | 32433880 | KD2-H4K8ac_peak_20667 | 6.65673  | CMTM7_ENSG00000153551                              |
| 3 | 32442736 | 32443404 | KD2-H4K8ac_peak_20668 | 24.89958 |                                                    |
| 3 | 32443706 | 32443977 | KD2-H4K8ac_peak_20669 | 9.44423  |                                                    |
| 3 | 32543796 | 32544306 | KD2-H4K8ac_peak_20670 | 4.86324  | CMTM6_ENSG00000091317                              |
| 3 | 32544704 | 32545052 | KD2-H4K8ac_peak_20671 | 4.42765  | CMTM6_ENSG00000091317                              |
| 3 | 32611578 | 32612219 | KD2-H4K8ac_peak_20672 | 11.60333 | DYNC1LI1_ENSG00000144635                           |
| 3 | 32726785 | 32727094 | KD2-H4K8ac_peak_20673 | 10.87093 | CNOT10_ENSG00000182973                             |
| 3 | 32822098 | 32822961 | KD2-H4K8ac_peak_20674 | 6.40683  |                                                    |
| 3 | 32851515 | 32851766 | KD2-H4K8ac_peak_20675 | 5.22731  |                                                    |
| 3 | 32858164 | 32858862 | KD2-H4K8ac_peak_20676 | 10.96455 | TRIM71_ENSG00000206557                             |
| 3 | 32944502 | 32944708 | KD2-H4K8ac_peak_20677 | 6.0073   |                                                    |
| 3 | 33111870 | 33112235 | KD2-H4K8ac_peak_20678 | 3.75035  |                                                    |
| 3 | 33138254 | 33138571 | KD2-H4K8ac_peak_20679 | 12.06346 | TMPPE_ENSG00000188167                              |
| 3 | 33138912 | 33139268 | KD2-H4K8ac_peak_20680 | 9.15069  | TMPPE_ENSG00000188167                              |
| 3 | 33139574 | 33139804 | KD2-H4K8ac_peak_20681 | 8.17902  |                                                    |
| 3 | 33155500 | 33155984 | KD2-H4K8ac_peak_20682 | 7.93948  | CRTAP_ENSG00000170275                              |
| 3 | 33318246 | 33318472 | KD2-H4K8ac_peak_20683 | 5.43522  | FBXL2_ENSG00000153558                              |
| 3 | 33482381 | 33482784 | KD2-H4K8ac_peak_20684 | 11.04256 | UBP1_ENSG00000153560                               |
| 3 | 33759318 | 33759649 | KD2-H4K8ac_peak_20685 | 7.49599  | CLASP2_ENSG00000163539                             |
| 3 | 33760200 | 33760421 | KD2-H4K8ac_peak_20686 | 9.11031  | CLASP2_ENSG00000163539                             |
| 3 | 35831057 | 35831573 | KD2-H4K8ac_peak_20687 | 8.1233   |                                                    |
| 3 | 36422015 | 36422263 | KD2-H4K8ac_peak_20688 | 7.62396  | STAC_ENSG00000144681                               |
| 3 | 36552908 | 36553595 | KD2-H4K8ac_peak_20689 | 6.40683  |                                                    |
| 3 | 36554533 | 36555103 | KD2-H4K8ac_peak_20690 | 8.1233   |                                                    |
| 3 | 36562847 | 36563054 | KD2-H4K8ac_peak_20691 | 9.97423  |                                                    |
| 3 | 36563311 | 36563530 | KD2-H4K8ac_peak_20692 | 4.16871  |                                                    |
| 3 | 36563932 | 36564428 | KD2-H4K8ac_peak_20693 | 11.04694 |                                                    |
| 3 | 36565427 | 36566085 | KD2-H4K8ac_peak_20694 | 5.14125  |                                                    |
| 3 | 36738661 | 36739035 | KD2-H4K8ac_peak_20695 | 9.31907  |                                                    |
| 3 | 36756045 | 36756247 | KD2-H4K8ac_peak_20696 | 4.49837  |                                                    |
| 3 | 36805460 | 36805669 | KD2-H4K8ac_peak_20697 | 6.13909  |                                                    |
| 3 | 36805898 | 36806109 | KD2-H4K8ac_peak_20698 | 7.62396  |                                                    |

|   |          |          |                       |          |                                                                                |
|---|----------|----------|-----------------------|----------|--------------------------------------------------------------------------------|
| 3 | 36966294 | 36966557 | KD2-H4K8ac_peak_20699 | 5.54647  |                                                                                |
| 3 | 37034181 | 37034544 | KD2-H4K8ac_peak_20700 | 9.11891  | EPM2AIP1_ENSG00000178567;MLH1_ENSG00000076242                                  |
| 3 | 37217465 | 37218279 | KD2-H4K8ac_peak_20701 | 20.02161 |                                                                                |
| 3 | 37283443 | 37283680 | KD2-H4K8ac_peak_20702 | 6.64891  | GOLGA4_ENSG00000144674                                                         |
| 3 | 37284113 | 37284694 | KD2-H4K8ac_peak_20703 | 16.3889  | RP11-259K5.2_ENSG00000270194;AC097359.1_ENSG00000176354;GOLGA4_ENSG00000144674 |
| 3 | 37493655 | 37494294 | KD2-H4K8ac_peak_20704 | 8.58069  | ITGA9_ENSG00000144668                                                          |
| 3 | 37518706 | 37519209 | KD2-H4K8ac_peak_20705 | 4.42765  |                                                                                |
| 3 | 37520887 | 37521101 | KD2-H4K8ac_peak_20706 | 6.8108   |                                                                                |
| 3 | 37532555 | 37532862 | KD2-H4K8ac_peak_20707 | 7.70289  |                                                                                |
| 3 | 37533635 | 37534073 | KD2-H4K8ac_peak_20708 | 14.48084 |                                                                                |
| 3 | 37535345 | 37535876 | KD2-H4K8ac_peak_20709 | 11.05407 |                                                                                |
| 3 | 37562197 | 37562555 | KD2-H4K8ac_peak_20710 | 7.70289  |                                                                                |
| 3 | 37563865 | 37564292 | KD2-H4K8ac_peak_20711 | 4.86324  |                                                                                |
| 3 | 37579284 | 37579538 | KD2-H4K8ac_peak_20712 | 4.70206  |                                                                                |
| 3 | 37580050 | 37580276 | KD2-H4K8ac_peak_20713 | 6.40297  |                                                                                |
| 3 | 37587006 | 37587361 | KD2-H4K8ac_peak_20714 | 7.76329  |                                                                                |
| 3 | 37741548 | 37741764 | KD2-H4K8ac_peak_20715 | 6.09229  |                                                                                |
| 3 | 37742737 | 37743147 | KD2-H4K8ac_peak_20716 | 7.47462  |                                                                                |
| 3 | 37814088 | 37814437 | KD2-H4K8ac_peak_20717 | 4.211    |                                                                                |
| 3 | 37901482 | 37901891 | KD2-H4K8ac_peak_20718 | 12.14909 |                                                                                |
| 3 | 37903463 | 37904008 | KD2-H4K8ac_peak_20719 | 6.66692  | AC093415.2_ENSG00000235257;CTDSPL_ENSG00000144677                              |
| 3 | 37964397 | 37964794 | KD2-H4K8ac_peak_20720 | 6.98292  |                                                                                |
| 3 | 37977312 | 37977638 | KD2-H4K8ac_peak_20721 | 5.45396  |                                                                                |
| 3 | 37988225 | 37988855 | KD2-H4K8ac_peak_20722 | 8.17902  |                                                                                |
| 3 | 38035344 | 38036081 | KD2-H4K8ac_peak_20723 | 9.67696  |                                                                                |
| 3 | 38065564 | 38065783 | KD2-H4K8ac_peak_20724 | 4.77079  |                                                                                |
| 3 | 38070220 | 38070429 | KD2-H4K8ac_peak_20725 | 6.45018  | PLCD1_ENSG00000187091                                                          |
| 3 | 38071382 | 38071592 | KD2-H4K8ac_peak_20726 | 8.21852  | PLCD1_ENSG00000187091                                                          |
| 3 | 38178937 | 38179171 | KD2-H4K8ac_peak_20727 | 7.70289  | ACAA1_ENSG00000060971;MYD88_ENSG00000172936                                    |
| 3 | 38179763 | 38181272 | KD2-H4K8ac_peak_20728 | 14.69247 | MYD88_ENSG00000172936                                                          |
| 3 | 38355436 | 38355735 | KD2-H4K8ac_peak_20729 | 5.71749  |                                                                                |
| 3 | 38495605 | 38496881 | KD2-H4K8ac_peak_20730 | 9.95119  | ACVR2B-AS1_ENSG00000229589;ACVR2B_ENSG00000114739                              |
| 3 | 38537906 | 38538236 | KD2-H4K8ac_peak_20731 | 4.91674  | EXOG_ENSG00000157036                                                           |
| 3 | 38583926 | 38584126 | KD2-H4K8ac_peak_20732 | 4.66652  |                                                                                |
| 3 | 38617069 | 38617298 | KD2-H4K8ac_peak_20733 | 5.20908  |                                                                                |
| 3 | 38620886 | 38621698 | KD2-H4K8ac_peak_20734 | 7.36799  |                                                                                |
| 3 | 38622162 | 38622418 | KD2-H4K8ac_peak_20735 | 12.06346 |                                                                                |
| 3 | 38624934 | 38625402 | KD2-H4K8ac_peak_20736 | 6.66692  |                                                                                |
| 3 | 38690306 | 38691163 | KD2-H4K8ac_peak_20737 | 9.51625  | SCN5A_ENSG00000183873                                                          |
| 3 | 38764662 | 38765092 | KD2-H4K8ac_peak_20738 | 7.1181   |                                                                                |
| 3 | 39092919 | 39093299 | KD2-H4K8ac_peak_20739 | 8.04448  | WDR48_ENSG00000114742                                                          |
| 3 | 39093571 | 39093853 | KD2-H4K8ac_peak_20740 | 9.63487  | WDR48_ENSG00000114742                                                          |
| 3 | 39148692 | 39149055 | KD2-H4K8ac_peak_20741 | 13.81781 | GORASP1_ENSG00000114745;TTC21A_ENSG00000168026                                 |
| 3 | 39189225 | 39189418 | KD2-H4K8ac_peak_20742 | 8.26945  |                                                                                |
| 3 | 39194690 | 39195426 | KD2-H4K8ac_peak_20743 | 10.05606 | CSRNP1_ENSG00000144655                                                         |
| 3 | 39219570 | 39219776 | KD2-H4K8ac_peak_20744 | 7.76104  |                                                                                |

|   |          |          |                       |          |                                                     |
|---|----------|----------|-----------------------|----------|-----------------------------------------------------|
| 3 | 39222464 | 39222699 | KD2-H4K8ac_peak_20745 | 9.89126  |                                                     |
| 3 | 39424367 | 39425320 | KD2-H4K8ac_peak_20746 | 6.99815  | SLC25A38_ENSG00000144659                            |
| 3 | 39543775 | 39544351 | KD2-H4K8ac_peak_20747 | 15.81711 |                                                     |
| 3 | 39794644 | 39794904 | KD2-H4K8ac_peak_20748 | 6.10699  |                                                     |
| 3 | 39851142 | 39851514 | KD2-H4K8ac_peak_20749 | 15.13261 | MYRIP_ENSG00000170011                               |
| 3 | 39948368 | 39948647 | KD2-H4K8ac_peak_20750 | 4.77079  |                                                     |
| 3 | 39950357 | 39950677 | KD2-H4K8ac_peak_20751 | 8.17902  |                                                     |
| 3 | 40085418 | 40085760 | KD2-H4K8ac_peak_20752 | 11.30637 |                                                     |
| 3 | 40350396 | 40350999 | KD2-H4K8ac_peak_20753 | 11.80283 | EIF1B_ENSG00000114784                               |
| 3 | 40351379 | 40351878 | KD2-H4K8ac_peak_20754 | 7.76104  | EIF1B_ENSG00000114784                               |
| 3 | 40498943 | 40499167 | KD2-H4K8ac_peak_20755 | 3.82395  | RPL14_ENSG00000188846                               |
| 3 | 40517641 | 40517899 | KD2-H4K8ac_peak_20756 | 6.16888  | ZNF619_ENSG00000177873                              |
| 3 | 40518350 | 40518869 | KD2-H4K8ac_peak_20757 | 16.32216 | ZNF619_ENSG00000177873                              |
| 3 | 40547019 | 40547613 | KD2-H4K8ac_peak_20758 | 17.42905 | ZNF620_ENSG00000177842                              |
| 3 | 40565974 | 40566254 | KD2-H4K8ac_peak_20759 | 11.05467 | ZNF621_ENSG00000172888                              |
| 3 | 40566476 | 40566891 | KD2-H4K8ac_peak_20760 | 7.76104  | ZNF621_ENSG00000172888                              |
| 3 | 40657108 | 40657660 | KD2-H4K8ac_peak_20761 | 7.40314  |                                                     |
| 3 | 40762276 | 40762476 | KD2-H4K8ac_peak_20762 | 4.92515  |                                                     |
| 3 | 41038448 | 41038968 | KD2-H4K8ac_peak_20763 | 6.40683  |                                                     |
| 3 | 41240188 | 41240851 | KD2-H4K8ac_peak_20764 | 17.75427 |                                                     |
| 3 | 42004143 | 42004411 | KD2-H4K8ac_peak_20765 | 10.08707 | ULK4_ENSG00000168038                                |
| 3 | 42054512 | 42055031 | KD2-H4K8ac_peak_20766 | 13.73635 | TRAK1_ENSG00000182606                               |
| 3 | 42055226 | 42055651 | KD2-H4K8ac_peak_20767 | 8.4716   | TRAK1_ENSG00000182606                               |
| 3 | 42065429 | 42065650 | KD2-H4K8ac_peak_20768 | 4.42765  |                                                     |
| 3 | 42084588 | 42084949 | KD2-H4K8ac_peak_20769 | 5.9696   |                                                     |
| 3 | 42623082 | 42623363 | KD2-H4K8ac_peak_20770 | 5.9696   | SS18L2_ENSG00000008324                              |
| 3 | 42623710 | 42624078 | KD2-H4K8ac_peak_20771 | 11.43353 | SS18L2_ENSG00000008324                              |
| 3 | 42631105 | 42631933 | KD2-H4K8ac_peak_20772 | 6.83936  |                                                     |
| 3 | 42642225 | 42642576 | KD2-H4K8ac_peak_20773 | 5.54647  | SEC22C_ENSG00000093183;NKTR_ENSG00000114857         |
| 3 | 42694260 | 42694473 | KD2-H4K8ac_peak_20774 | 3.76273  | ZBTB47_ENSG00000114853                              |
| 3 | 42695401 | 42695693 | KD2-H4K8ac_peak_20775 | 11.79585 | ZBTB47_ENSG00000114853;RP4-613B23.1_ENSG00000230084 |
| 3 | 42695965 | 42696850 | KD2-H4K8ac_peak_20776 | 13.73635 | ZBTB47_ENSG00000114853;RP4-613B23.1_ENSG00000230084 |
| 3 | 42845611 | 42845826 | KD2-H4K8ac_peak_20777 | 6.24114  | HIGD1A_ENSG00000181061;ACKR2_ENSG00000144648        |
| 3 | 42922173 | 42922954 | KD2-H4K8ac_peak_20778 | 10.66719 |                                                     |
| 3 | 42947135 | 42947778 | KD2-H4K8ac_peak_20779 | 7.146    | ZNF662_ENSG00000182983                              |
| 3 | 43060706 | 43060913 | KD2-H4K8ac_peak_20780 | 6.90458  |                                                     |
| 3 | 43147200 | 43147494 | KD2-H4K8ac_peak_20781 | 13.09607 | POMGNT2_ENSG00000144647                             |
| 3 | 43327679 | 43328307 | KD2-H4K8ac_peak_20782 | 13.57066 | SNRK_ENSG00000163788                                |
| 3 | 43663045 | 43663439 | KD2-H4K8ac_peak_20783 | 6.65673  |                                                     |
| 3 | 43664060 | 43664633 | KD2-H4K8ac_peak_20784 | 5.88845  |                                                     |
| 3 | 43731665 | 43732225 | KD2-H4K8ac_peak_20785 | 8.30974  | ANO10_ENSG00000160746;ABHD5_ENSG00000011198         |
| 3 | 43732526 | 43732974 | KD2-H4K8ac_peak_20786 | 7.76329  | ANO10_ENSG00000160746;ABHD5_ENSG00000011198         |
| 3 | 43811220 | 43811988 | KD2-H4K8ac_peak_20787 | 4.37809  |                                                     |
| 3 | 43812642 | 43813456 | KD2-H4K8ac_peak_20788 | 4.91674  |                                                     |
| 3 | 43814281 | 43814602 | KD2-H4K8ac_peak_20789 | 6.60096  |                                                     |
| 3 | 43814964 | 43815259 | KD2-H4K8ac_peak_20790 | 9.63487  |                                                     |



|   |          |          |                       |          |                                                     |
|---|----------|----------|-----------------------|----------|-----------------------------------------------------|
| 3 | 43827076 | 43827681 | KD2-H4K8ac_peak_20791 | 7.07512  |                                                     |
| 3 | 43828281 | 43828581 | KD2-H4K8ac_peak_20792 | 5.405    |                                                     |
| 3 | 43924873 | 43925370 | KD2-H4K8ac_peak_20793 | 4.44527  |                                                     |
| 3 | 43994332 | 43994602 | KD2-H4K8ac_peak_20794 | 7.40111  |                                                     |
| 3 | 44036740 | 44037526 | KD2-H4K8ac_peak_20795 | 5.64429  | RP4-555D20.3_ENSG00000271192                        |
| 3 | 44039970 | 44040602 | KD2-H4K8ac_peak_20796 | 10.43145 | RP4-555D20.4_ENSG00000272121                        |
| 3 | 44063296 | 44063795 | KD2-H4K8ac_peak_20797 | 7.01964  |                                                     |
| 3 | 44379350 | 44380142 | KD2-H4K8ac_peak_20798 | 12.08081 | RP11-424N24.2_ENSG00000271937;TCAIM_ENSG00000179152 |
| 3 | 44480723 | 44481163 | KD2-H4K8ac_peak_20799 | 5.88845  |                                                     |
| 3 | 44518849 | 44519901 | KD2-H4K8ac_peak_20800 | 22.36554 | ZNF445_ENSG00000185219                              |
| 3 | 44552331 | 44552951 | KD2-H4K8ac_peak_20801 | 12.06346 | ZNF852_ENSG00000178917                              |
| 3 | 44596095 | 44597087 | KD2-H4K8ac_peak_20802 | 11.50346 | ZKSCAN7_ENSG00000196345                             |
| 3 | 44626429 | 44626766 | KD2-H4K8ac_peak_20803 | 9.95119  | ZNF197_ENSG00000186448                              |
| 3 | 44666162 | 44666378 | KD2-H4K8ac_peak_20804 | 10.1591  | ZNF197-AS1_ENSG00000233509                          |
| 3 | 44666607 | 44666857 | KD2-H4K8ac_peak_20805 | 15.61313 | ZNF197-AS1_ENSG00000233509                          |
| 3 | 44689952 | 44690676 | KD2-H4K8ac_peak_20806 | 16.72355 | ZNF35_ENSG00000169981                               |
| 3 | 44726786 | 44727081 | KD2-H4K8ac_peak_20807 | 6.65673  | RP11-944L7.4_ENSG00000236869                        |
| 3 | 44753722 | 44753957 | KD2-H4K8ac_peak_20808 | 6.16888  | ZNF502_ENSG00000196653                              |
| 3 | 44754189 | 44754600 | KD2-H4K8ac_peak_20809 | 10.96455 | ZNF502_ENSG00000196653                              |
| 3 | 44770562 | 44771486 | KD2-H4K8ac_peak_20810 | 12.42761 | ZNF501_ENSG00000186446                              |
| 3 | 44902877 | 44903948 | KD2-H4K8ac_peak_20811 | 13.73635 | TMEM42_ENSG00000169964;MIR564_ENSG00000207783       |
| 3 | 45037495 | 45037699 | KD2-H4K8ac_peak_20812 | 4.67342  |                                                     |
| 3 | 45208522 | 45208846 | KD2-H4K8ac_peak_20813 | 8.5781   |                                                     |
| 3 | 45379960 | 45380377 | KD2-H4K8ac_peak_20814 | 5.835    |                                                     |
| 3 | 45422987 | 45423478 | KD2-H4K8ac_peak_20815 | 10.46264 |                                                     |
| 3 | 45429528 | 45429821 | KD2-H4K8ac_peak_20816 | 8.23274  | LARS2_ENSG00000011376                               |
| 3 | 45430143 | 45430337 | KD2-H4K8ac_peak_20817 | 6.65673  | LARS2_ENSG00000011376                               |
| 3 | 45624567 | 45625028 | KD2-H4K8ac_peak_20818 | 9.59147  |                                                     |
| 3 | 45634957 | 45636034 | KD2-H4K8ac_peak_20819 | 11.92978 |                                                     |
| 3 | 45730918 | 45731202 | KD2-H4K8ac_peak_20820 | 7.76329  | LIMD1-AS1_ENSG00000230530;SACM1L_ENSG00000211456    |
| 3 | 45837777 | 45838107 | KD2-H4K8ac_peak_20821 | 8.30974  | SLC6A20_ENSG00000163817                             |
| 3 | 45849663 | 45849902 | KD2-H4K8ac_peak_20822 | 6.94255  |                                                     |
| 3 | 45883311 | 45883528 | KD2-H4K8ac_peak_20823 | 7.59643  |                                                     |
| 3 | 45883798 | 45884313 | KD2-H4K8ac_peak_20824 | 12.80176 |                                                     |
| 3 | 46036751 | 46037255 | KD2-H4K8ac_peak_20825 | 7.45501  | FYCO1_ENSG00000163820                               |
| 3 | 46530459 | 46530688 | KD2-H4K8ac_peak_20826 | 8.23274  |                                                     |
| 3 | 46607496 | 46607741 | KD2-H4K8ac_peak_20827 | 8.4716   |                                                     |
| 3 | 46650899 | 46651110 | KD2-H4K8ac_peak_20828 | 4.01115  |                                                     |
| 3 | 46705091 | 46705362 | KD2-H4K8ac_peak_20829 | 9.89126  |                                                     |
| 3 | 46735295 | 46735585 | KD2-H4K8ac_peak_20830 | 17.55491 | ALS2CL_ENSG00000178038                              |
| 3 | 46736960 | 46737240 | KD2-H4K8ac_peak_20831 | 8.52881  |                                                     |
| 3 | 46741661 | 46742073 | KD2-H4K8ac_peak_20832 | 12.40345 | TMIE_ENSG00000181585                                |
| 3 | 46742668 | 46743477 | KD2-H4K8ac_peak_20833 | 11.92978 | TMIE_ENSG00000181585                                |
| 3 | 46886085 | 46886291 | KD2-H4K8ac_peak_20834 | 5.14125  |                                                     |
| 3 | 46886906 | 46887370 | KD2-H4K8ac_peak_20835 | 15.05364 |                                                     |
| 3 | 46887676 | 46888511 | KD2-H4K8ac_peak_20836 | 18.86697 |                                                     |

|   |          |          |                       |          |                                                     |
|---|----------|----------|-----------------------|----------|-----------------------------------------------------|
| 3 | 46951405 | 46951627 | KD2-H4K8ac_peak_20837 | 5.4779   |                                                     |
| 3 | 47018544 | 47018785 | KD2-H4K8ac_peak_20838 | 9.63925  |                                                     |
| 3 | 47020370 | 47020992 | KD2-H4K8ac_peak_20839 | 10.29344 | NBEAL2_ENSG00000160796                              |
| 3 | 47021214 | 47021409 | KD2-H4K8ac_peak_20840 | 8.30974  | NBEAL2_ENSG00000160796                              |
| 3 | 47050168 | 47050493 | KD2-H4K8ac_peak_20841 | 4.76709  |                                                     |
| 3 | 47051187 | 47051717 | KD2-H4K8ac_peak_20842 | 15.40891 |                                                     |
| 3 | 47204872 | 47205214 | KD2-H4K8ac_peak_20843 | 6.0605   | SETD2_ENSG00000181555;KIF9-AS1_ENSG00000227398      |
| 3 | 47324130 | 47324828 | KD2-H4K8ac_peak_20844 | 6.20982  | KIF9_ENSG00000088727;KLHL18_ENSG00000114648         |
| 3 | 47462749 | 47463323 | KD2-H4K8ac_peak_20845 | 6.99815  |                                                     |
| 3 | 47516975 | 47517288 | KD2-H4K8ac_peak_20846 | 5.61067  |                                                     |
| 3 | 47517570 | 47517959 | KD2-H4K8ac_peak_20847 | 18.80827 | SCAP_ENSG00000114650                                |
| 3 | 47518172 | 47518443 | KD2-H4K8ac_peak_20848 | 6.25869  | SCAP_ENSG00000114650                                |
| 3 | 47554497 | 47554778 | KD2-H4K8ac_peak_20849 | 6.20982  | ELP6_ENSG00000163832                                |
| 3 | 47555020 | 47555820 | KD2-H4K8ac_peak_20850 | 5.59859  | ELP6_ENSG00000163832                                |
| 3 | 47823067 | 47823289 | KD2-H4K8ac_peak_20851 | 9.41619  | SMARCC1_ENSG00000173473                             |
| 3 | 47823661 | 47824009 | KD2-H4K8ac_peak_20852 | 11.80283 | SMARCC1_ENSG00000173473                             |
| 3 | 47830149 | 47830657 | KD2-H4K8ac_peak_20853 | 9.402    |                                                     |
| 3 | 47844149 | 47845290 | KD2-H4K8ac_peak_20854 | 22.76112 | DHX30_ENSG00000132153                               |
| 3 | 47866490 | 47867067 | KD2-H4K8ac_peak_20855 | 18.39704 |                                                     |
| 3 | 48130573 | 48130793 | KD2-H4K8ac_peak_20856 | 11.50346 | MAP4_ENSG00000047849                                |
| 3 | 48192363 | 48192745 | KD2-H4K8ac_peak_20857 | 9.15329  |                                                     |
| 3 | 48193032 | 48193598 | KD2-H4K8ac_peak_20858 | 6.07178  |                                                     |
| 3 | 48228920 | 48229428 | KD2-H4K8ac_peak_20859 | 9.31907  | CDC25A_ENSG00000164045                              |
| 3 | 48230176 | 48230689 | KD2-H4K8ac_peak_20860 | 19.43192 | CDC25A_ENSG00000164045                              |
| 3 | 48236334 | 48236531 | KD2-H4K8ac_peak_20861 | 4.01115  |                                                     |
| 3 | 48274542 | 48274866 | KD2-H4K8ac_peak_20862 | 6.30229  |                                                     |
| 3 | 48281807 | 48282054 | KD2-H4K8ac_peak_20863 | 5.53095  | ZNF589_ENSG00000164048                              |
| 3 | 48342371 | 48343409 | KD2-H4K8ac_peak_20864 | 13.3695  | NME6_ENSG00000172113                                |
| 3 | 48392850 | 48393161 | KD2-H4K8ac_peak_20865 | 4.75764  |                                                     |
| 3 | 48411285 | 48411661 | KD2-H4K8ac_peak_20866 | 6.0073   |                                                     |
| 3 | 48469569 | 48470095 | KD2-H4K8ac_peak_20867 | 11.15071 |                                                     |
| 3 | 48470343 | 48471809 | KD2-H4K8ac_peak_20868 | 15.40891 | PLXNB1_ENSG00000164050                              |
| 3 | 48481059 | 48481459 | KD2-H4K8ac_peak_20869 | 10.05606 | CCDC51_ENSG00000164051;TMA7_ENSG00000232112         |
| 3 | 48481733 | 48482213 | KD2-H4K8ac_peak_20870 | 7.96322  | CCDC51_ENSG00000164051;TMA7_ENSG00000232112         |
| 3 | 48487770 | 48488395 | KD2-H4K8ac_peak_20871 | 11.05467 | RP11-24C3.2_ENSG00000244380;ATRIP_ENSG00000164053   |
| 3 | 48507217 | 48507842 | KD2-H4K8ac_peak_20872 | 10.29842 | TREX1_ENSG00000213689                               |
| 3 | 48540912 | 48542396 | KD2-H4K8ac_peak_20873 | 13.73635 | SHISA5_ENSG00000164054                              |
| 3 | 48586007 | 48586490 | KD2-H4K8ac_peak_20874 | 9.1707   |                                                     |
| 3 | 48598314 | 48598999 | KD2-H4K8ac_peak_20875 | 6.99815  | PFKFB4_ENSG00000114268                              |
| 3 | 48632456 | 48632732 | KD2-H4K8ac_peak_20876 | 6.83936  | COL7A1_ENSG00000114270                              |
| 3 | 48646646 | 48647785 | KD2-H4K8ac_peak_20877 | 13.59098 | UQCRC1_ENSG0000010256                               |
| 3 | 48672173 | 48672855 | KD2-H4K8ac_peak_20878 | 9.34989  | SLC26A6_ENSG00000225697                             |
| 3 | 48673321 | 48673570 | KD2-H4K8ac_peak_20879 | 5.405    | SLC26A6_ENSG00000225697                             |
| 3 | 48700612 | 48701014 | KD2-H4K8ac_peak_20880 | 11.82518 | CELSR3_ENSG0000008300;RP11-148G20.1_ENSG00000228350 |
| 3 | 48722929 | 48723261 | KD2-H4K8ac_peak_20881 | 6.99815  | NCKIPSD_ENSG00000213672                             |
| 3 | 48754223 | 48754544 | KD2-H4K8ac_peak_20882 | 11.2938  |                                                     |

|   |          |          |                       |          |                                                                                              |
|---|----------|----------|-----------------------|----------|----------------------------------------------------------------------------------------------|
| 3 | 48755041 | 48755360 | KD2-H4K8ac_peak_20883 | 9.73431  |                                                                                              |
| 3 | 48777261 | 48777720 | KD2-H4K8ac_peak_20884 | 9.34195  | IP6K2_ENSG00000068745                                                                        |
| 3 | 48936614 | 48936822 | KD2-H4K8ac_peak_20885 | 4.42765  | SLC25A20_ENSG00000178537                                                                     |
| 3 | 48955970 | 48956473 | KD2-H4K8ac_peak_20886 | 6.66692  | ARIH2OS_ENSG00000221883;ARIH2_ENSG00000177479                                                |
| 3 | 49035399 | 49036130 | KD2-H4K8ac_peak_20887 | 7.27716  |                                                                                              |
| 3 | 49043641 | 49044563 | KD2-H4K8ac_peak_20888 | 9.36516  | WDR6_ENSG00000178252                                                                         |
| 3 | 49044866 | 49045239 | KD2-H4K8ac_peak_20889 | 14.12659 | WDR6_ENSG00000178252                                                                         |
| 3 | 49055663 | 49056236 | KD2-H4K8ac_peak_20890 | 18.94636 |                                                                                              |
| 3 | 49058236 | 49058775 | KD2-H4K8ac_peak_20891 | 11.8696  | DALRD3_ENSG00000178149;MIR425_ENSG00000199032;NDUFAF3_ENSG00000178057;MIR191_ENSG00000207605 |
| 3 | 49059142 | 49060099 | KD2-H4K8ac_peak_20892 | 23.70459 | DALRD3_ENSG00000178149                                                                       |
| 3 | 49131081 | 49131424 | KD2-H4K8ac_peak_20893 | 6.67538  | QRICH1_ENSG00000198218                                                                       |
| 3 | 49141807 | 49142152 | KD2-H4K8ac_peak_20894 | 18.37277 | QARS_ENSG00000172053                                                                         |
| 3 | 49157700 | 49158948 | KD2-H4K8ac_peak_20895 | 14.68449 | USP19_ENSG00000172046                                                                        |
| 3 | 49170732 | 49171116 | KD2-H4K8ac_peak_20896 | 9.81419  | LAMB2_ENSG00000172037                                                                        |
| 3 | 49203075 | 49204456 | KD2-H4K8ac_peak_20897 | 10.7186  | CCDC71_ENSG00000177352                                                                       |
| 3 | 49208362 | 49208598 | KD2-H4K8ac_peak_20898 | 6.45083  | KLHDC8B_ENSG00000185909                                                                      |
| 3 | 49209127 | 49209363 | KD2-H4K8ac_peak_20899 | 6.60096  | KLHDC8B_ENSG00000185909                                                                      |
| 3 | 49210187 | 49210571 | KD2-H4K8ac_peak_20900 | 8.16906  |                                                                                              |
| 3 | 49211637 | 49211843 | KD2-H4K8ac_peak_20901 | 6.99194  |                                                                                              |
| 3 | 49377036 | 49377410 | KD2-H4K8ac_peak_20902 | 12.08081 | USP4_ENSG00000114316                                                                         |
| 3 | 49377700 | 49378644 | KD2-H4K8ac_peak_20903 | 13.73635 | USP4_ENSG00000114316                                                                         |
| 3 | 49395351 | 49395756 | KD2-H4K8ac_peak_20904 | 12.70959 | GPX1_ENSG00000233276                                                                         |
| 3 | 49395981 | 49396603 | KD2-H4K8ac_peak_20905 | 10.73134 | GPX1_ENSG00000233276                                                                         |
| 3 | 49448866 | 49449338 | KD2-H4K8ac_peak_20906 | 11.89502 | TCTA_ENSG00000145022                                                                         |
| 3 | 49449781 | 49450051 | KD2-H4K8ac_peak_20907 | 22.78932 | RHOA_ENSG00000067560;TCTA_ENSG00000145022                                                    |
| 3 | 49459349 | 49459655 | KD2-H4K8ac_peak_20908 | 7.69287  | AMT_ENSG00000145020;NICN1-AS1_ENSG00000235261                                                |
| 3 | 49466536 | 49467039 | KD2-H4K8ac_peak_20909 | 10.96455 | NICN1_ENSG00000145029                                                                        |
| 3 | 49467468 | 49467811 | KD2-H4K8ac_peak_20910 | 7.76329  | NICN1_ENSG00000145029                                                                        |
| 3 | 49506899 | 49507394 | KD2-H4K8ac_peak_20911 | 7.76329  | DAG1_ENSG00000173402                                                                         |
| 3 | 49507889 | 49508279 | KD2-H4K8ac_peak_20912 | 8.30974  |                                                                                              |
| 3 | 49576808 | 49577210 | KD2-H4K8ac_peak_20913 | 9.16531  |                                                                                              |
| 3 | 49577567 | 49578111 | KD2-H4K8ac_peak_20914 | 11.79585 |                                                                                              |
| 3 | 49591429 | 49591725 | KD2-H4K8ac_peak_20915 | 7.07117  | BSN-AS2_ENSG00000226913;BSN_ENSG00000164061                                                  |
| 3 | 49647322 | 49647682 | KD2-H4K8ac_peak_20916 | 6.40683  |                                                                                              |
| 3 | 49710777 | 49711156 | KD2-H4K8ac_peak_20917 | 15.36189 | APEH_ENSG00000164062                                                                         |
| 3 | 49724424 | 49724859 | KD2-H4K8ac_peak_20918 | 5.54647  |                                                                                              |
| 3 | 49726184 | 49727251 | KD2-H4K8ac_peak_20919 | 12.17278 | MST1_ENSG00000173531;RNF123_ENSG00000164068                                                  |
| 3 | 49760985 | 49761324 | KD2-H4K8ac_peak_20920 | 4.44527  | AMIGO3_ENSG00000176020;GMPPB_ENSG00000173540                                                 |
| 3 | 49761701 | 49762239 | KD2-H4K8ac_peak_20921 | 10.86378 | AMIGO3_ENSG00000176020;GMPPB_ENSG00000173540                                                 |
| 3 | 49823661 | 49823940 | KD2-H4K8ac_peak_20922 | 15.25814 | IP6K1_ENSG00000176095                                                                        |
| 3 | 49824250 | 49824575 | KD2-H4K8ac_peak_20923 | 19.91242 | IP6K1_ENSG00000176095                                                                        |
| 3 | 49840728 | 49840993 | KD2-H4K8ac_peak_20924 | 11.92978 | FAM212A_ENSG00000185614                                                                      |
| 3 | 49843105 | 49843605 | KD2-H4K8ac_peak_20925 | 17.55491 | MIR5193_ENSG00000263506                                                                      |
| 3 | 49844046 | 49844714 | KD2-H4K8ac_peak_20926 | 10.7186  | MIR5193_ENSG00000263506                                                                      |
| 3 | 49845074 | 49845418 | KD2-H4K8ac_peak_20927 | 5.50645  |                                                                                              |
| 3 | 49845653 | 49845890 | KD2-H4K8ac_peak_20928 | 6.20524  |                                                                                              |

|   |          |          |                       |          |                                            |
|---|----------|----------|-----------------------|----------|--------------------------------------------|
| 3 | 49894114 | 49894479 | KD2-H4K8ac_peak_20929 | 18.29344 | TRAIIP_ENSG00000183763                     |
| 3 | 49906969 | 49907542 | KD2-H4K8ac_peak_20930 | 9.70019  | CAMKV_ENSG00000164076                      |
| 3 | 49910528 | 49910971 | KD2-H4K8ac_peak_20931 | 5.88845  |                                            |
| 3 | 49967459 | 49968170 | KD2-H4K8ac_peak_20932 | 20.24043 | MON1A_ENSG00000164077                      |
| 3 | 49976946 | 49977266 | KD2-H4K8ac_peak_20933 | 14.8083  | RBM6_ENSG00000004534                       |
| 3 | 50125622 | 50126028 | KD2-H4K8ac_peak_20934 | 7.146    | RBM5_ENSG00000003756                       |
| 3 | 50126464 | 50126895 | KD2-H4K8ac_peak_20935 | 8.65175  | RBM5_ENSG00000003756                       |
| 3 | 50163055 | 50163496 | KD2-H4K8ac_peak_20936 | 10.05606 |                                            |
| 3 | 50175336 | 50175644 | KD2-H4K8ac_peak_20937 | 5.14125  |                                            |
| 3 | 50176027 | 50176454 | KD2-H4K8ac_peak_20938 | 6.66692  |                                            |
| 3 | 50187429 | 50187689 | KD2-H4K8ac_peak_20939 | 6.25869  |                                            |
| 3 | 50188068 | 50188338 | KD2-H4K8ac_peak_20940 | 4.55978  |                                            |
| 3 | 50188627 | 50189564 | KD2-H4K8ac_peak_20941 | 6.52179  |                                            |
| 3 | 50191873 | 50192191 | KD2-H4K8ac_peak_20942 | 7.69287  | SEMA3F_ENSG00000001617                     |
| 3 | 50242422 | 50242940 | KD2-H4K8ac_peak_20943 | 7.76329  | SLC38A3_ENSG00000188338                    |
| 3 | 50263827 | 50264411 | KD2-H4K8ac_peak_20944 | 7.49599  | GNAI2_ENSG00000114353                      |
| 3 | 50265131 | 50265855 | KD2-H4K8ac_peak_20945 | 14.68449 |                                            |
| 3 | 50275834 | 50276165 | KD2-H4K8ac_peak_20946 | 5.88845  | U73169.1_ENSG00000213600                   |
| 3 | 50282973 | 50283730 | KD2-H4K8ac_peak_20947 | 15.40891 |                                            |
| 3 | 50283981 | 50284184 | KD2-H4K8ac_peak_20948 | 3.90565  |                                            |
| 3 | 50297165 | 50297449 | KD2-H4K8ac_peak_20949 | 9.73431  | U73166.2_ENSG00000230454                   |
| 3 | 50297750 | 50298791 | KD2-H4K8ac_peak_20950 | 23.17425 | U73166.2_ENSG00000230454                   |
| 3 | 50329407 | 50329821 | KD2-H4K8ac_peak_20951 | 14.03725 | IFRD2_ENSG00000214706                      |
| 3 | 50330267 | 50330680 | KD2-H4K8ac_peak_20952 | 6.40297  | IFRD2_ENSG00000214706                      |
| 3 | 50336355 | 50336600 | KD2-H4K8ac_peak_20953 | 6.66359  | HYAL3_ENSG00000186792;NAT6_ENSG00000243477 |
| 3 | 50340856 | 50341207 | KD2-H4K8ac_peak_20954 | 5.91842  |                                            |
| 3 | 50358363 | 50359159 | KD2-H4K8ac_peak_20955 | 9.95119  |                                            |
| 3 | 50359443 | 50359660 | KD2-H4K8ac_peak_20956 | 8.10216  | HYAL2_ENSG00000068001                      |
| 3 | 50374376 | 50374795 | KD2-H4K8ac_peak_20957 | 12.93209 |                                            |
| 3 | 50375185 | 50375682 | KD2-H4K8ac_peak_20958 | 8.55271  |                                            |
| 3 | 50375987 | 50376439 | KD2-H4K8ac_peak_20959 | 6.60096  |                                            |
| 3 | 50396552 | 50396886 | KD2-H4K8ac_peak_20960 | 8.4716   | TMEM115_ENSG00000126062                    |
| 3 | 50405761 | 50405979 | KD2-H4K8ac_peak_20961 | 7.40111  |                                            |
| 3 | 50412182 | 50412652 | KD2-H4K8ac_peak_20962 | 7.76329  |                                            |
| 3 | 50413671 | 50413890 | KD2-H4K8ac_peak_20963 | 5.54647  |                                            |
| 3 | 50414961 | 50415325 | KD2-H4K8ac_peak_20964 | 7.40314  |                                            |
| 3 | 50415662 | 50416306 | KD2-H4K8ac_peak_20965 | 4.54006  |                                            |
| 3 | 50416716 | 50417487 | KD2-H4K8ac_peak_20966 | 9.43857  |                                            |
| 3 | 50417714 | 50418832 | KD2-H4K8ac_peak_20967 | 26.8781  |                                            |
| 3 | 50419164 | 50419888 | KD2-H4K8ac_peak_20968 | 14.17923 |                                            |
| 3 | 50420192 | 50420987 | KD2-H4K8ac_peak_20969 | 9.26287  |                                            |
| 3 | 50422442 | 50423283 | KD2-H4K8ac_peak_20970 | 13.21979 |                                            |
| 3 | 50423631 | 50424194 | KD2-H4K8ac_peak_20971 | 8.2413   |                                            |
| 3 | 50424450 | 50425464 | KD2-H4K8ac_peak_20972 | 16.95399 |                                            |
| 3 | 50425697 | 50428267 | KD2-H4K8ac_peak_20973 | 17.42905 |                                            |
| 3 | 50428603 | 50430305 | KD2-H4K8ac_peak_20974 | 17.43561 |                                            |

|   |          |          |                       |          |                                                                                                               |
|---|----------|----------|-----------------------|----------|---------------------------------------------------------------------------------------------------------------|
| 3 | 50431958 | 50432267 | KD2-H4K8ac_peak_20975 | 5.06602  |                                                                                                               |
| 3 | 50432800 | 50433013 | KD2-H4K8ac_peak_20976 | 5.06602  |                                                                                                               |
| 3 | 50462599 | 50463055 | KD2-H4K8ac_peak_20977 | 9.06369  |                                                                                                               |
| 3 | 50463373 | 50465767 | KD2-H4K8ac_peak_20978 | 13.77586 |                                                                                                               |
| 3 | 50466020 | 50466688 | KD2-H4K8ac_peak_20979 | 17.97634 |                                                                                                               |
| 3 | 50467073 | 50468357 | KD2-H4K8ac_peak_20980 | 21.07675 |                                                                                                               |
| 3 | 50468834 | 50469251 | KD2-H4K8ac_peak_20981 | 12.82393 |                                                                                                               |
| 3 | 50469447 | 50471057 | KD2-H4K8ac_peak_20982 | 7.49599  |                                                                                                               |
| 3 | 50471259 | 50472776 | KD2-H4K8ac_peak_20983 | 10.19949 |                                                                                                               |
| 3 | 50473168 | 50474287 | KD2-H4K8ac_peak_20984 | 8.34752  |                                                                                                               |
| 3 | 50474505 | 50476250 | KD2-H4K8ac_peak_20985 | 10.46843 |                                                                                                               |
| 3 | 50477101 | 50477339 | KD2-H4K8ac_peak_20986 | 4.67342  |                                                                                                               |
| 3 | 50540593 | 50540799 | KD2-H4K8ac_peak_20987 | 5.14125  | CACNA2D2_ENSG00000007402                                                                                      |
| 3 | 50541243 | 50541731 | KD2-H4K8ac_peak_20988 | 8.30974  | CACNA2D2_ENSG00000007402                                                                                      |
| 3 | 50550553 | 50550857 | KD2-H4K8ac_peak_20989 | 5.61067  |                                                                                                               |
| 3 | 50552671 | 50553223 | KD2-H4K8ac_peak_20990 | 11.05467 |                                                                                                               |
| 3 | 50553717 | 50554937 | KD2-H4K8ac_peak_20991 | 13.73635 |                                                                                                               |
| 3 | 50562737 | 50563186 | KD2-H4K8ac_peak_20992 | 7.95934  |                                                                                                               |
| 3 | 50569874 | 50570140 | KD2-H4K8ac_peak_20993 | 5.01002  |                                                                                                               |
| 3 | 50604704 | 50605181 | KD2-H4K8ac_peak_20994 | 12.70959 |                                                                                                               |
| 3 | 50605816 | 50606041 | KD2-H4K8ac_peak_20995 | 8.56219  | HEMK1_ENSG00000114735                                                                                         |
| 3 | 50606327 | 50607497 | KD2-H4K8ac_peak_20996 | 12.82393 | C3orf18_ENSG00000088543;HEMK1_ENSG00000114735                                                                 |
| 3 | 50638267 | 50638536 | KD2-H4K8ac_peak_20997 | 5.34636  |                                                                                                               |
| 3 | 50638840 | 50639403 | KD2-H4K8ac_peak_20998 | 5.4779   |                                                                                                               |
| 3 | 50639615 | 50639830 | KD2-H4K8ac_peak_20999 | 8.99803  |                                                                                                               |
| 3 | 50648996 | 50649397 | KD2-H4K8ac_peak_21000 | 5.75757  | CISH_ENSG00000114737;MAPKAPK3_ENSG00000114738                                                                 |
| 3 | 50668953 | 50669442 | KD2-H4K8ac_peak_21001 | 5.57044  |                                                                                                               |
| 3 | 51421608 | 51422410 | KD2-H4K8ac_peak_21002 | 18.54875 | MANF_ENSG00000145050                                                                                          |
| 3 | 51422785 | 51423192 | KD2-H4K8ac_peak_21003 | 4.06758  | MANF_ENSG00000145050                                                                                          |
| 3 | 51428765 | 51429267 | KD2-H4K8ac_peak_21004 | 9.20193  | RBM15B_ENSG00000179837                                                                                        |
| 3 | 51534641 | 51535040 | KD2-H4K8ac_peak_21005 | 5.54647  | VPRBP_ENSG00000145041                                                                                         |
| 3 | 51571910 | 51573331 | KD2-H4K8ac_peak_21006 | 11.05407 |                                                                                                               |
| 3 | 51704794 | 51705031 | KD2-H4K8ac_peak_21007 | 6.66692  |                                                                                                               |
| 3 | 51705289 | 51705855 | KD2-H4K8ac_peak_21008 | 17.27647 |                                                                                                               |
| 3 | 51846466 | 51846691 | KD2-H4K8ac_peak_21009 | 5.15777  |                                                                                                               |
| 3 | 51976398 | 51976875 | KD2-H4K8ac_peak_21010 | 12.30509 | RRP9_ENSG00000114767;PARP3_ENSG00000041880                                                                    |
| 3 | 51990286 | 51991048 | KD2-H4K8ac_peak_21011 | 7.47462  | GPR62_ENSG00000180929                                                                                         |
| 3 | 52001012 | 52002307 | KD2-H4K8ac_peak_21012 | 28.09167 | PCBP4_ENSG00000090097                                                                                         |
| 3 | 52002601 | 52002866 | KD2-H4K8ac_peak_21013 | 9.05418  | PCBP4_ENSG00000090097                                                                                         |
| 3 | 52003606 | 52003862 | KD2-H4K8ac_peak_21014 | 3.76327  |                                                                                                               |
| 3 | 52007736 | 52007960 | KD2-H4K8ac_peak_21015 | 6.65673  | RP11-155D18.14_ENSG00000272762;RP11-155D18.12_ENSG00000254782                                                 |
| 3 | 52008222 | 52009386 | KD2-H4K8ac_peak_21016 | 15.61313 | RP11-155D18.14_ENSG00000272762;RP11-155D18.12_ENSG00000254782;ACY1_ENSG00000243989;ABHD14A-ACY1_ENSG000001147 |
| 3 | 52017091 | 52018140 | KD2-H4K8ac_peak_21017 | 16.822   | ABHD14B_ENSG00000114779                                                                                       |
| 3 | 52029505 | 52029863 | KD2-H4K8ac_peak_21018 | 10.05606 | RPL29_ENSG00000162244                                                                                         |
| 3 | 52039001 | 52040855 | KD2-H4K8ac_peak_21019 | 10.43145 |                                                                                                               |
| 3 | 52050183 | 52050390 | KD2-H4K8ac_peak_21020 | 5.98692  |                                                                                                               |

|   |          |          |                       |          |                                                                         |
|---|----------|----------|-----------------------|----------|-------------------------------------------------------------------------|
| 3 | 52053229 | 52053640 | KD2-H4K8ac_peak_21021 | 5.82799  |                                                                         |
| 3 | 52055164 | 52056510 | KD2-H4K8ac_peak_21022 | 17.55491 |                                                                         |
| 3 | 52057772 | 52058043 | KD2-H4K8ac_peak_21023 | 10.08707 |                                                                         |
| 3 | 52059950 | 52060775 | KD2-H4K8ac_peak_21024 | 8.26945  |                                                                         |
| 3 | 52062239 | 52064969 | KD2-H4K8ac_peak_21025 | 22.21705 |                                                                         |
| 3 | 52065730 | 52066369 | KD2-H4K8ac_peak_21026 | 14.84786 |                                                                         |
| 3 | 52066639 | 52067769 | KD2-H4K8ac_peak_21027 | 18.86697 |                                                                         |
| 3 | 52070103 | 52070330 | KD2-H4K8ac_peak_21028 | 5.30799  |                                                                         |
| 3 | 52071567 | 52071867 | KD2-H4K8ac_peak_21029 | 9.02745  |                                                                         |
| 3 | 52075560 | 52075949 | KD2-H4K8ac_peak_21030 | 4.211    |                                                                         |
| 3 | 52079335 | 52079719 | KD2-H4K8ac_peak_21031 | 6.53538  |                                                                         |
| 3 | 52090820 | 52091156 | KD2-H4K8ac_peak_21032 | 5.02474  | DUSP7_ENSG00000164086                                                   |
| 3 | 52091677 | 52091957 | KD2-H4K8ac_peak_21033 | 6.75585  |                                                                         |
| 3 | 52096731 | 52097684 | KD2-H4K8ac_peak_21034 | 8.23274  | LINC00696_ENSG00000256097                                               |
| 3 | 52100165 | 52100557 | KD2-H4K8ac_peak_21035 | 5.13615  |                                                                         |
| 3 | 52101271 | 52102114 | KD2-H4K8ac_peak_21036 | 14.1139  |                                                                         |
| 3 | 52102381 | 52103265 | KD2-H4K8ac_peak_21037 | 13.12288 |                                                                         |
| 3 | 52103609 | 52104100 | KD2-H4K8ac_peak_21038 | 5.54647  |                                                                         |
| 3 | 52104327 | 52104580 | KD2-H4K8ac_peak_21039 | 7.95563  |                                                                         |
| 3 | 52122229 | 52122731 | KD2-H4K8ac_peak_21040 | 7.47462  |                                                                         |
| 3 | 52142874 | 52143169 | KD2-H4K8ac_peak_21041 | 7.76329  |                                                                         |
| 3 | 52231466 | 52232488 | KD2-H4K8ac_peak_21042 | 16.09057 | ALAS1_ENSG00000023330                                                   |
| 3 | 52273329 | 52274597 | KD2-H4K8ac_peak_21043 | 9.402    | TLR9_ENSG00000239732;TWF2_ENSG00000247596;RP5-1157M23.2_ENSG00000243224 |
| 3 | 52279483 | 52280315 | KD2-H4K8ac_peak_21044 | 4.91674  | PPM1M_ENSG00000164088                                                   |
| 3 | 52312078 | 52312505 | KD2-H4K8ac_peak_21045 | 5.9696   |                                                                         |
| 3 | 52313268 | 52313553 | KD2-H4K8ac_peak_21046 | 12.82393 |                                                                         |
| 3 | 52321130 | 52321543 | KD2-H4K8ac_peak_21047 | 7.67504  | WDR82_ENSG00000164091                                                   |
| 3 | 52321831 | 52322728 | KD2-H4K8ac_peak_21048 | 10.96455 | WDR82_ENSG00000164091                                                   |
| 3 | 52331765 | 52332880 | KD2-H4K8ac_peak_21049 | 8.10216  |                                                                         |
| 3 | 52333189 | 52334615 | KD2-H4K8ac_peak_21050 | 21.75906 |                                                                         |
| 3 | 52340926 | 52341499 | KD2-H4K8ac_peak_21051 | 11.92978 |                                                                         |
| 3 | 52342145 | 52342411 | KD2-H4K8ac_peak_21052 | 5.9696   |                                                                         |
| 3 | 52345000 | 52345330 | KD2-H4K8ac_peak_21053 | 14.72123 |                                                                         |
| 3 | 52345841 | 52346222 | KD2-H4K8ac_peak_21054 | 12.65012 |                                                                         |
| 3 | 52443632 | 52443949 | KD2-H4K8ac_peak_21055 | 11.92978 | BAP1_ENSG00000163930;PHF7_ENSG00000010318                               |
| 3 | 52444619 | 52444899 | KD2-H4K8ac_peak_21056 | 9.35804  | BAP1_ENSG00000163930;PHF7_ENSG00000010318                               |
| 3 | 52480931 | 52481125 | KD2-H4K8ac_peak_21057 | 4.8888   |                                                                         |
| 3 | 52489078 | 52489485 | KD2-H4K8ac_peak_21058 | 13.30586 | TNNC1_ENSG00000114854;NISCH_ENSG00000010322                             |
| 3 | 52490282 | 52490475 | KD2-H4K8ac_peak_21059 | 4.78225  |                                                                         |
| 3 | 52558701 | 52558925 | KD2-H4K8ac_peak_21060 | 7.40314  |                                                                         |
| 3 | 52564847 | 52565300 | KD2-H4K8ac_peak_21061 | 7.36799  |                                                                         |
| 3 | 52566874 | 52567637 | KD2-H4K8ac_peak_21062 | 10.15155 | SMIM4_ENSG00000168273                                                   |
| 3 | 52568037 | 52568663 | KD2-H4K8ac_peak_21063 | 13.48341 | NT5DC2_ENSG00000168268;SMIM4_ENSG00000168273                            |
| 3 | 52719702 | 52719936 | KD2-H4K8ac_peak_21064 | 12.57143 | PBRM1_ENSG00000163939                                                   |
| 3 | 52720244 | 52720517 | KD2-H4K8ac_peak_21065 | 5.88845  | PBRM1_ENSG00000163939                                                   |
| 3 | 52739407 | 52740448 | KD2-H4K8ac_peak_21066 | 11.24702 | SPCS1_ENSG00000114902                                                   |

|   |          |          |                       |          |                                                  |
|---|----------|----------|-----------------------|----------|--------------------------------------------------|
| 3 | 52805271 | 52805875 | KD2-H4K8ac_peak_21067 | 4.52039  | NEK4_ENSG00000114904                             |
| 3 | 52809276 | 52809537 | KD2-H4K8ac_peak_21068 | 4.42643  |                                                  |
| 3 | 53019789 | 53020063 | KD2-H4K8ac_peak_21069 | 14.74047 |                                                  |
| 3 | 53079680 | 53080360 | KD2-H4K8ac_peak_21070 | 14.8083  | SFMBT1_ENSG00000163935                           |
| 3 | 53107294 | 53107906 | KD2-H4K8ac_peak_21071 | 9.34989  |                                                  |
| 3 | 53164145 | 53164417 | KD2-H4K8ac_peak_21072 | 15.58442 | RFT1_ENSG00000163933                             |
| 3 | 53164655 | 53165146 | KD2-H4K8ac_peak_21073 | 8.23274  | RFT1_ENSG00000163933                             |
| 3 | 53194565 | 53194832 | KD2-H4K8ac_peak_21074 | 5.14125  |                                                  |
| 3 | 53195265 | 53195582 | KD2-H4K8ac_peak_21075 | 8.94469  |                                                  |
| 3 | 53270473 | 53270843 | KD2-H4K8ac_peak_21076 | 4.67342  |                                                  |
| 3 | 53303639 | 53303972 | KD2-H4K8ac_peak_21077 | 6.66692  |                                                  |
| 3 | 53304230 | 53304936 | KD2-H4K8ac_peak_21078 | 15.00387 |                                                  |
| 3 | 53381155 | 53381519 | KD2-H4K8ac_peak_21079 | 14.80472 | DCP1A_ENSG00000162290                            |
| 3 | 53381806 | 53382220 | KD2-H4K8ac_peak_21080 | 11.28831 | DCP1A_ENSG00000162290                            |
| 3 | 53527955 | 53528564 | KD2-H4K8ac_peak_21081 | 9.63487  | CACNA1D_ENSG00000157388                          |
| 3 | 53568979 | 53569183 | KD2-H4K8ac_peak_21082 | 3.75035  |                                                  |
| 3 | 53569483 | 53570041 | KD2-H4K8ac_peak_21083 | 4.70388  |                                                  |
| 3 | 53705023 | 53705428 | KD2-H4K8ac_peak_21084 | 8.94469  |                                                  |
| 3 | 53707876 | 53708152 | KD2-H4K8ac_peak_21085 | 5.86783  |                                                  |
| 3 | 53807354 | 53807614 | KD2-H4K8ac_peak_21086 | 15.06766 |                                                  |
| 3 | 53807920 | 53808444 | KD2-H4K8ac_peak_21087 | 10.0692  |                                                  |
| 3 | 53829719 | 53830019 | KD2-H4K8ac_peak_21088 | 7.40314  |                                                  |
| 3 | 53879779 | 53880884 | KD2-H4K8ac_peak_21089 | 10.96455 | CHDH_ENSG00000016391;IL17RB_ENSG00000056736      |
| 3 | 53915935 | 53916131 | KD2-H4K8ac_peak_21090 | 7.57336  | ACTR8_ENSG00000113812;AC012467.1_ENSG00000222888 |
| 3 | 53925537 | 53925736 | KD2-H4K8ac_peak_21091 | 6.30607  | SELK_ENSG00000113811                             |
| 3 | 54081054 | 54081656 | KD2-H4K8ac_peak_21092 | 6.30626  |                                                  |
| 3 | 54180553 | 54180786 | KD2-H4K8ac_peak_21093 | 11.1952  |                                                  |
| 3 | 54965196 | 54965434 | KD2-H4K8ac_peak_21094 | 9.11818  |                                                  |
| 3 | 55522632 | 55522862 | KD2-H4K8ac_peak_21095 | 6.36375  | WNT5A-AS1_ENSG00000244586                        |
| 3 | 56320007 | 56320292 | KD2-H4K8ac_peak_21096 | 6.16888  |                                                  |
| 3 | 56501775 | 56502438 | KD2-H4K8ac_peak_21097 | 7.76329  | ERC2_ENSG00000187672                             |
| 3 | 56591380 | 56591616 | KD2-H4K8ac_peak_21098 | 7.40314  | CCDC66_ENSG00000180376                           |
| 3 | 56716404 | 56717648 | KD2-H4K8ac_peak_21099 | 29.48993 | FAM208A_ENSG00000163946                          |
| 3 | 57010794 | 57011290 | KD2-H4K8ac_peak_21100 | 4.77079  |                                                  |
| 3 | 57011490 | 57011781 | KD2-H4K8ac_peak_21101 | 9.06703  |                                                  |
| 3 | 57019629 | 57019844 | KD2-H4K8ac_peak_21102 | 3.72574  |                                                  |
| 3 | 57020459 | 57020710 | KD2-H4K8ac_peak_21103 | 5.14125  |                                                  |
| 3 | 57155215 | 57155957 | KD2-H4K8ac_peak_21104 | 8.02571  |                                                  |
| 3 | 57157151 | 57157493 | KD2-H4K8ac_peak_21105 | 10.46264 |                                                  |
| 3 | 57159038 | 57159709 | KD2-H4K8ac_peak_21106 | 5.88845  |                                                  |
| 3 | 57160511 | 57161116 | KD2-H4K8ac_peak_21107 | 6.11333  |                                                  |
| 3 | 57163233 | 57163784 | KD2-H4K8ac_peak_21108 | 7.72801  |                                                  |
| 3 | 57164017 | 57164709 | KD2-H4K8ac_peak_21109 | 6.04107  |                                                  |
| 3 | 57165358 | 57166344 | KD2-H4K8ac_peak_21110 | 10.19949 |                                                  |
| 3 | 57168573 | 57169102 | KD2-H4K8ac_peak_21111 | 10.0089  | RP11-157F20.1_ENSG00000229863                    |
| 3 | 57172636 | 57172832 | KD2-H4K8ac_peak_21112 | 7.5554   |                                                  |

|   |          |          |                       |          |                                                       |
|---|----------|----------|-----------------------|----------|-------------------------------------------------------|
| 3 | 57177144 | 57178166 | KD2-H4K8ac_peak_21113 | 13.62729 |                                                       |
| 3 | 57178512 | 57179233 | KD2-H4K8ac_peak_21114 | 7.27716  |                                                       |
| 3 | 57182777 | 57183240 | KD2-H4K8ac_peak_21115 | 6.44277  |                                                       |
| 3 | 57184546 | 57184799 | KD2-H4K8ac_peak_21116 | 5.45396  |                                                       |
| 3 | 57185736 | 57186520 | KD2-H4K8ac_peak_21117 | 13.1258  |                                                       |
| 3 | 57187903 | 57188183 | KD2-H4K8ac_peak_21118 | 8.70727  |                                                       |
| 3 | 57191203 | 57191500 | KD2-H4K8ac_peak_21119 | 11.43863 |                                                       |
| 3 | 57193466 | 57194249 | KD2-H4K8ac_peak_21120 | 7.146    |                                                       |
| 3 | 57194510 | 57194729 | KD2-H4K8ac_peak_21121 | 7.146    |                                                       |
| 3 | 57196047 | 57196404 | KD2-H4K8ac_peak_21122 | 6.22239  |                                                       |
| 3 | 57198849 | 57199370 | KD2-H4K8ac_peak_21123 | 12.16946 |                                                       |
| 3 | 57203868 | 57204631 | KD2-H4K8ac_peak_21124 | 9.51625  | IL17RD_ENSG00000144730                                |
| 3 | 57251720 | 57251920 | KD2-H4K8ac_peak_21125 | 7.12754  |                                                       |
| 3 | 57261896 | 57262287 | KD2-H4K8ac_peak_21126 | 9.96798  | APPL1_ENSG00000157500                                 |
| 3 | 57540591 | 57540989 | KD2-H4K8ac_peak_21127 | 6.11333  |                                                       |
| 3 | 57541549 | 57541761 | KD2-H4K8ac_peak_21128 | 8.16906  | PDE12_ENSG00000174840                                 |
| 3 | 57542043 | 57542376 | KD2-H4K8ac_peak_21129 | 7.90806  | PDE12_ENSG00000174840                                 |
| 3 | 57582827 | 57583048 | KD2-H4K8ac_peak_21130 | 7.98621  | ARF4_ENSG00000168374;RP11-755B10.4_ENSG00000272146    |
| 3 | 57678488 | 57678769 | KD2-H4K8ac_peak_21131 | 13.81781 | DENND6A_ENSG00000174839;RP11-755B10.3_ENSG00000241933 |
| 3 | 57679194 | 57679398 | KD2-H4K8ac_peak_21132 | 4.42765  | DENND6A_ENSG00000174839;RP11-755B10.3_ENSG00000241933 |
| 3 | 57937050 | 57937378 | KD2-H4K8ac_peak_21133 | 7.47462  |                                                       |
| 3 | 57993638 | 57994445 | KD2-H4K8ac_peak_21134 | 23.8815  | FLNB_ENSG00000136068                                  |
| 3 | 58000588 | 58000791 | KD2-H4K8ac_peak_21135 | 4.54006  |                                                       |
| 3 | 58163656 | 58164032 | KD2-H4K8ac_peak_21136 | 8.85813  |                                                       |
| 3 | 58291502 | 58291769 | KD2-H4K8ac_peak_21137 | 14.56955 | RPP14_ENSG00000163684                                 |
| 3 | 58292028 | 58292220 | KD2-H4K8ac_peak_21138 | 10.08707 | RPP14_ENSG00000163684                                 |
| 3 | 58317960 | 58318563 | KD2-H4K8ac_peak_21139 | 12.82393 | PXK_ENSG00000168297                                   |
| 3 | 58419271 | 58419503 | KD2-H4K8ac_peak_21140 | 11.22681 | PDHB_ENSG00000168291                                  |
| 3 | 58419734 | 58419984 | KD2-H4K8ac_peak_21141 | 10.43145 | PDHB_ENSG00000168291                                  |
| 3 | 58477019 | 58477230 | KD2-H4K8ac_peak_21142 | 7.76329  | RP11-359I18.5_ENSG00000272360;KCTD6_ENSG00000168301   |
| 3 | 58477895 | 58478289 | KD2-H4K8ac_peak_21143 | 5.75757  | RP11-359I18.5_ENSG00000272360;KCTD6_ENSG00000168301   |
| 3 | 58570870 | 58571516 | KD2-H4K8ac_peak_21144 | 5.54647  |                                                       |
| 3 | 59035305 | 59035727 | KD2-H4K8ac_peak_21145 | 20.47312 | C3orf67_ENSG00000163689                               |
| 3 | 59235838 | 59236079 | KD2-H4K8ac_peak_21146 | 5.73839  |                                                       |
| 3 | 59593010 | 59593214 | KD2-H4K8ac_peak_21147 | 5.80249  |                                                       |
| 3 | 59686976 | 59687275 | KD2-H4K8ac_peak_21148 | 4.77079  |                                                       |
| 3 | 59693097 | 59693294 | KD2-H4K8ac_peak_21149 | 5.13341  |                                                       |
| 3 | 59695519 | 59696118 | KD2-H4K8ac_peak_21150 | 10.12553 |                                                       |
| 3 | 59719248 | 59719915 | KD2-H4K8ac_peak_21151 | 11.86082 |                                                       |
| 3 | 59758982 | 59759567 | KD2-H4K8ac_peak_21152 | 7.27716  |                                                       |
| 3 | 59761113 | 59761320 | KD2-H4K8ac_peak_21153 | 5.29352  |                                                       |
| 3 | 59803570 | 59803784 | KD2-H4K8ac_peak_21154 | 5.80249  |                                                       |
| 3 | 61236625 | 61237089 | KD2-H4K8ac_peak_21155 | 17.8868  | FHIT_ENSG00000189283                                  |
| 3 | 61237526 | 61237817 | KD2-H4K8ac_peak_21156 | 7.71478  | FHIT_ENSG00000189283                                  |
| 3 | 61318768 | 61319101 | KD2-H4K8ac_peak_21157 | 10.72656 |                                                       |
| 3 | 61546319 | 61546560 | KD2-H4K8ac_peak_21158 | 7.22936  | PTPRG_ENSG00000144724                                 |



|   |          |          |                       |          |                                                                                    |
|---|----------|----------|-----------------------|----------|------------------------------------------------------------------------------------|
| 3 | 61546847 | 61547064 | KD2-H4K8ac_peak_21159 | 6.66692  | PTPRG_ENSG00000144724                                                              |
| 3 | 61579903 | 61580280 | KD2-H4K8ac_peak_21160 | 5.14125  |                                                                                    |
| 3 | 62304747 | 62305054 | KD2-H4K8ac_peak_21161 | 4.211    | C3orf14_ENSG00000114405                                                            |
| 3 | 62554864 | 62555103 | KD2-H4K8ac_peak_21162 | 6.40683  |                                                                                    |
| 3 | 62572198 | 62572433 | KD2-H4K8ac_peak_21163 | 6.31143  |                                                                                    |
| 3 | 63001086 | 63001417 | KD2-H4K8ac_peak_21164 | 4.59928  |                                                                                    |
| 3 | 63072199 | 63072746 | KD2-H4K8ac_peak_21165 | 6.16888  |                                                                                    |
| 3 | 63328780 | 63329369 | KD2-H4K8ac_peak_21166 | 8.5781   |                                                                                    |
| 3 | 63330402 | 63330609 | KD2-H4K8ac_peak_21167 | 6.40683  |                                                                                    |
| 3 | 63848964 | 63849491 | KD2-H4K8ac_peak_21168 | 17.55491 | THOC7_ENSG00000163634;ATXN7_ENSG00000163635                                        |
| 3 | 63849757 | 63850367 | KD2-H4K8ac_peak_21169 | 15.53798 | THOC7_ENSG00000163634;ATXN7_ENSG00000163635                                        |
| 3 | 64008932 | 64009128 | KD2-H4K8ac_peak_21170 | 10.29842 | PSMD6_ENSG00000163636                                                              |
| 3 | 64136204 | 64136497 | KD2-H4K8ac_peak_21171 | 6.27931  |                                                                                    |
| 3 | 64210804 | 64211121 | KD2-H4K8ac_peak_21172 | 5.71749  |                                                                                    |
| 3 | 64430860 | 64431388 | KD2-H4K8ac_peak_21173 | 5.45396  | PRICKLE2_ENSG00000163637;RP11-14D22.2_ENSG00000243993;RP11-14D22.1_ENSG00000244564 |
| 3 | 64628317 | 64628665 | KD2-H4K8ac_peak_21174 | 7.47462  |                                                                                    |
| 3 | 64658699 | 64659153 | KD2-H4K8ac_peak_21175 | 10.06887 |                                                                                    |
| 3 | 64661075 | 64661425 | KD2-H4K8ac_peak_21176 | 4.42765  |                                                                                    |
| 3 | 64663026 | 64663225 | KD2-H4K8ac_peak_21177 | 5.29555  |                                                                                    |
| 3 | 64671773 | 64672020 | KD2-H4K8ac_peak_21178 | 6.90231  |                                                                                    |
| 3 | 64673891 | 64674451 | KD2-H4K8ac_peak_21179 | 8.86099  | ADAMTS9_ENSG00000163638                                                            |
| 3 | 64843283 | 64843692 | KD2-H4K8ac_peak_21180 | 7.75499  |                                                                                    |
| 3 | 64844706 | 64845044 | KD2-H4K8ac_peak_21181 | 10.0746  |                                                                                    |
| 3 | 65156335 | 65156694 | KD2-H4K8ac_peak_21182 | 7.12754  |                                                                                    |
| 3 | 65194955 | 65195172 | KD2-H4K8ac_peak_21183 | 6.2781   |                                                                                    |
| 3 | 65196774 | 65197118 | KD2-H4K8ac_peak_21184 | 5.14125  |                                                                                    |
| 3 | 65216426 | 65217015 | KD2-H4K8ac_peak_21185 | 5.54647  |                                                                                    |
| 3 | 65218158 | 65218422 | KD2-H4K8ac_peak_21186 | 5.88845  | AC104331.1_ENSG00000264871                                                         |
| 3 | 65545416 | 65545673 | KD2-H4K8ac_peak_21187 | 6.1846   |                                                                                    |
| 3 | 65582335 | 65582832 | KD2-H4K8ac_peak_21188 | 10.29344 |                                                                                    |
| 3 | 65583306 | 65584126 | KD2-H4K8ac_peak_21189 | 14.66631 |                                                                                    |
| 3 | 66024157 | 66024413 | KD2-H4K8ac_peak_21190 | 7.51054  | MAGI1_ENSG00000151276                                                              |
| 3 | 66024902 | 66025634 | KD2-H4K8ac_peak_21191 | 14.84212 | MAGI1_ENSG00000151276                                                              |
| 3 | 66063407 | 66063700 | KD2-H4K8ac_peak_21192 | 5.51783  |                                                                                    |
| 3 | 66448698 | 66449124 | KD2-H4K8ac_peak_21193 | 6.63018  |                                                                                    |
| 3 | 66550912 | 66551113 | KD2-H4K8ac_peak_21194 | 4.68059  | LRIG1_ENSG00000144749                                                              |
| 3 | 67704499 | 67705669 | KD2-H4K8ac_peak_21195 | 12.82393 | SUCLG2_ENSG00000172340;RP11-81N13.1_ENSG00000241316                                |
| 3 | 69062081 | 69063190 | KD2-H4K8ac_peak_21196 | 18.7894  | EOGT_ENSG00000163378;CTD-2013N24.2_ENSG00000244513                                 |
| 3 | 69101852 | 69102269 | KD2-H4K8ac_peak_21197 | 5.20908  | TMF1_ENSG00000144747                                                               |
| 3 | 69128980 | 69129284 | KD2-H4K8ac_peak_21198 | 13.81781 | UBA3_ENSG00000144744                                                               |
| 3 | 69133470 | 69133899 | KD2-H4K8ac_peak_21199 | 10.21502 | ARL6IP5_ENSG00000144746                                                            |
| 3 | 69134235 | 69134553 | KD2-H4K8ac_peak_21200 | 11.05407 | ARL6IP5_ENSG00000144746                                                            |
| 3 | 69503587 | 69503835 | KD2-H4K8ac_peak_21201 | 6.56926  |                                                                                    |
| 3 | 69788649 | 69788903 | KD2-H4K8ac_peak_21202 | 6.56211  | MITF_ENSG00000187098                                                               |
| 3 | 71032103 | 71032328 | KD2-H4K8ac_peak_21203 | 6.40683  |                                                                                    |
| 3 | 71102549 | 71102829 | KD2-H4K8ac_peak_21204 | 5.30799  |                                                                                    |

|   |          |          |                       |          |                                                      |
|---|----------|----------|-----------------------|----------|------------------------------------------------------|
| 3 | 71113582 | 71114039 | KD2-H4K8ac_peak_21205 | 10.21502 |                                                      |
| 3 | 71114249 | 71114791 | KD2-H4K8ac_peak_21206 | 12.42547 |                                                      |
| 3 | 71150101 | 71150602 | KD2-H4K8ac_peak_21207 | 6.40683  |                                                      |
| 3 | 71215483 | 71215685 | KD2-H4K8ac_peak_21208 | 5.25071  |                                                      |
| 3 | 71296400 | 71296786 | KD2-H4K8ac_peak_21209 | 8.62078  |                                                      |
| 3 | 71592610 | 71592868 | KD2-H4K8ac_peak_21210 | 6.56211  |                                                      |
| 3 | 71630564 | 71631013 | KD2-H4K8ac_peak_21211 | 6.66692  |                                                      |
| 3 | 71631543 | 71633104 | KD2-H4K8ac_peak_21212 | 9.73431  | FOXP1_ENSG00000114861;RP11-154H23.3_ENSG00000270562  |
| 3 | 71774291 | 71774484 | KD2-H4K8ac_peak_21213 | 4.19765  |                                                      |
| 3 | 71774717 | 71775004 | KD2-H4K8ac_peak_21214 | 9.95119  |                                                      |
| 3 | 71802560 | 71803812 | KD2-H4K8ac_peak_21215 | 16.822   | EIF4E3_ENSG00000163412;GPR27_ENSG00000170837         |
| 3 | 71834367 | 71834619 | KD2-H4K8ac_peak_21216 | 9.36516  | PROK2_ENSG00000163421                                |
| 3 | 72005573 | 72005825 | KD2-H4K8ac_peak_21217 | 5.45396  |                                                      |
| 3 | 72201009 | 72201793 | KD2-H4K8ac_peak_21218 | 5.88845  | LINC00870_ENSG00000243083                            |
| 3 | 72226999 | 72227196 | KD2-H4K8ac_peak_21219 | 5.6755   | RP11-433A10.3_ENSG00000272774                        |
| 3 | 72304515 | 72304746 | KD2-H4K8ac_peak_21220 | 5.88845  |                                                      |
| 3 | 72337666 | 72337911 | KD2-H4K8ac_peak_21221 | 5.20908  |                                                      |
| 3 | 72338114 | 72338818 | KD2-H4K8ac_peak_21222 | 8.26945  |                                                      |
| 3 | 72345573 | 72346030 | KD2-H4K8ac_peak_21223 | 7.36799  |                                                      |
| 3 | 72353049 | 72353449 | KD2-H4K8ac_peak_21224 | 6.99815  |                                                      |
| 3 | 72360311 | 72360530 | KD2-H4K8ac_peak_21225 | 5.08628  |                                                      |
| 3 | 72385964 | 72386273 | KD2-H4K8ac_peak_21226 | 9.89383  |                                                      |
| 3 | 72496518 | 72496953 | KD2-H4K8ac_peak_21227 | 14.12659 | RYBP_ENSG00000163602                                 |
| 3 | 72619669 | 72619863 | KD2-H4K8ac_peak_21228 | 7.47462  |                                                      |
| 3 | 72818625 | 72818856 | KD2-H4K8ac_peak_21229 | 8.59579  |                                                      |
| 3 | 72897304 | 72897547 | KD2-H4K8ac_peak_21230 | 6.65673  |                                                      |
| 3 | 72937277 | 72937739 | KD2-H4K8ac_peak_21231 | 6.66692  | GXYLT2_ENSG00000172986                               |
| 3 | 73045121 | 73045673 | KD2-H4K8ac_peak_21232 | 3.86308  | PPP4R2_ENSG00000163605                               |
| 3 | 73046026 | 73046506 | KD2-H4K8ac_peak_21233 | 10.7186  | PPP4R2_ENSG00000163605                               |
| 3 | 73242029 | 73242241 | KD2-H4K8ac_peak_21234 | 9.11031  |                                                      |
| 3 | 73400065 | 73400319 | KD2-H4K8ac_peak_21235 | 8.74596  |                                                      |
| 3 | 73481299 | 73481696 | KD2-H4K8ac_peak_21236 | 5.54647  |                                                      |
| 3 | 73519667 | 73519890 | KD2-H4K8ac_peak_21237 | 7.01964  |                                                      |
| 3 | 73520135 | 73521128 | KD2-H4K8ac_peak_21238 | 19.6416  |                                                      |
| 3 | 73522192 | 73522394 | KD2-H4K8ac_peak_21239 | 4.37708  |                                                      |
| 3 | 73673528 | 73673952 | KD2-H4K8ac_peak_21240 | 8.12706  | PDZRN3_ENSG00000121440                               |
| 3 | 74382051 | 74382243 | KD2-H4K8ac_peak_21241 | 5.22731  |                                                      |
| 3 | 74663700 | 74664135 | KD2-H4K8ac_peak_21242 | 7.27716  |                                                      |
| 3 | 75485036 | 75485229 | KD2-H4K8ac_peak_21243 | 7.40314  | FAM86DP_ENSG00000244026;RP11-803B1.8_ENSG00000272690 |
| 3 | 75834013 | 75834691 | KD2-H4K8ac_peak_21244 | 26.9893  | ZNF717_ENSG00000227124                               |
| 3 | 75835103 | 75835336 | KD2-H4K8ac_peak_21245 | 4.95402  | ZNF717_ENSG00000227124                               |
| 3 | 75955936 | 75956184 | KD2-H4K8ac_peak_21246 | 8.10216  | ROBO2_ENSG00000185008                                |
| 3 | 77088703 | 77089110 | KD2-H4K8ac_peak_21247 | 6.60096  |                                                      |
| 3 | 81810200 | 81811143 | KD2-H4K8ac_peak_21248 | 14.275   | GBE1_ENSG00000114480                                 |
| 3 | 85553715 | 85554127 | KD2-H4K8ac_peak_21249 | 15.5861  |                                                      |
| 3 | 87275926 | 87276321 | KD2-H4K8ac_peak_21250 | 7.40111  | MIR4795_ENSG00000264119;CHMP2B_ENSG00000083937       |

|   |           |          |                       |          |                                                     |
|---|-----------|----------|-----------------------|----------|-----------------------------------------------------|
| 3 | 87276581  | 87276864 | KD2-H4K8ac_peak_21251 | 8.4716   | CHMP2B_ENSG00000083937                              |
| 3 | 88107574  | 88108061 | KD2-H4K8ac_peak_21252 | 4.54006  | RP11-159G9.5_ENSG00000229729                        |
| 3 | 88108440  | 88108772 | KD2-H4K8ac_peak_21253 | 13.39763 | RP11-159G9.5_ENSG00000229729                        |
| 3 | 88198344  | 88198961 | KD2-H4K8ac_peak_21254 | 9.36516  | CGGBP1_ENSG00000163320;C3orf38_ENSG00000179021      |
| 3 | 88199170  | 88199563 | KD2-H4K8ac_peak_21255 | 15.22643 | CGGBP1_ENSG00000163320;C3orf38_ENSG00000179021      |
| 3 | 93531330  | 93531547 | KD2-H4K8ac_peak_21256 | 5.01262  |                                                     |
| 3 | 93692561  | 93693136 | KD2-H4K8ac_peak_21257 | 6.99815  | PROS1_ENSG00000184500                               |
| 3 | 93693358  | 93693550 | KD2-H4K8ac_peak_21258 | 5.77029  | PROS1_ENSG00000184500                               |
| 3 | 93781906  | 93782108 | KD2-H4K8ac_peak_21259 | 13.92465 | DHFRL1_ENSG00000178700;NSUN3_ENSG00000178694        |
| 3 | 93782559  | 93782965 | KD2-H4K8ac_peak_21260 | 4.37815  | DHFRL1_ENSG00000178700;NSUN3_ENSG00000178694        |
| 3 | 94131291  | 94131488 | KD2-H4K8ac_peak_21261 | 7.12754  |                                                     |
| 3 | 94150810  | 94151064 | KD2-H4K8ac_peak_21262 | 7.12754  |                                                     |
| 3 | 96147463  | 96147714 | KD2-H4K8ac_peak_21263 | 7.12754  |                                                     |
| 3 | 96532307  | 96532690 | KD2-H4K8ac_peak_21264 | 6.60096  | EPHA6_ENSG00000080224                               |
| 3 | 97483109  | 97483831 | KD2-H4K8ac_peak_21265 | 8.55271  | ARL6_ENSG00000113966                                |
| 3 | 97540925  | 97541516 | KD2-H4K8ac_peak_21266 | 9.6589   | CRYBG3_ENSG00000233280                              |
| 3 | 97691604  | 97691976 | KD2-H4K8ac_peak_21267 | 5.58333  | MINA_ENSG00000170854                                |
| 3 | 98312697  | 98313101 | KD2-H4K8ac_peak_21268 | 8.98477  | CPOX_ENSG00000080819                                |
| 3 | 98451628  | 98452192 | KD2-H4K8ac_peak_21269 | 11.04256 | ST3GAL6-AS1_ENSG00000239445;ST3GAL6_ENSG00000064225 |
| 3 | 98482604  | 98483057 | KD2-H4K8ac_peak_21270 | 8.97719  |                                                     |
| 3 | 98685816  | 98686087 | KD2-H4K8ac_peak_21271 | 9.02371  |                                                     |
| 3 | 99594858  | 99595230 | KD2-H4K8ac_peak_21272 | 5.13615  |                                                     |
| 3 | 99978958  | 99979257 | KD2-H4K8ac_peak_21273 | 13.68542 | TBC1D23_ENSG00000036054                             |
| 3 | 99979876  | 99980084 | KD2-H4K8ac_peak_21274 | 6.0605   | TBC1D23_ENSG00000036054                             |
| 3 | 100053687 | 1E+08    | KD2-H4K8ac_peak_21275 | 9.95119  | NIT2_ENSG00000114021                                |
| 3 | 100119351 | 1E+08    | KD2-H4K8ac_peak_21276 | 10.65724 | TOMM70A_ENSG00000154174;LNP1_ENSG00000206535        |
| 3 | 100210816 | 1E+08    | KD2-H4K8ac_peak_21277 | 8.23274  | TMEM45A_ENSG00000181458                             |
| 3 | 100428393 | 1E+08    | KD2-H4K8ac_peak_21278 | 8.59579  | TFG_ENSG00000114354                                 |
| 3 | 100428803 | 1E+08    | KD2-H4K8ac_peak_21279 | 11.15509 | TFG_ENSG00000114354                                 |
| 3 | 101231386 | 1.01E+08 | KD2-H4K8ac_peak_21280 | 14.74047 | SENPF7_ENSG00000138468                              |
| 3 | 101280315 | 1.01E+08 | KD2-H4K8ac_peak_21281 | 14.43704 | TRMT10C_ENSG00000174173                             |
| 3 | 101293222 | 1.01E+08 | KD2-H4K8ac_peak_21282 | 17.16047 | PCNP_ENSG00000081154                                |
| 3 | 101395391 | 1.01E+08 | KD2-H4K8ac_peak_21283 | 9.242    | ZBTB11_ENSG00000066422;ZBTB11-AS1_ENSG00000256628   |
| 3 | 101405258 | 1.01E+08 | KD2-H4K8ac_peak_21284 | 10.17341 | RPL24_ENSG00000114391                               |
| 3 | 101443959 | 1.01E+08 | KD2-H4K8ac_peak_21285 | 5.14125  |                                                     |
| 3 | 101497714 | 1.01E+08 | KD2-H4K8ac_peak_21286 | 9.34195  | NXPE3_ENSG00000144815                               |
| 3 | 101567733 | 1.02E+08 | KD2-H4K8ac_peak_21287 | 11.43353 |                                                     |
| 3 | 101568563 | 1.02E+08 | KD2-H4K8ac_peak_21288 | 6.36375  |                                                     |
| 3 | 102440166 | 1.02E+08 | KD2-H4K8ac_peak_21289 | 14.15075 |                                                     |
| 3 | 102929642 | 1.03E+08 | KD2-H4K8ac_peak_21290 | 7.01964  |                                                     |
| 3 | 103623193 | 1.04E+08 | KD2-H4K8ac_peak_21291 | 10.05606 |                                                     |
| 3 | 104628063 | 1.05E+08 | KD2-H4K8ac_peak_21292 | 6.40683  |                                                     |
| 3 | 104675866 | 1.05E+08 | KD2-H4K8ac_peak_21293 | 5.45396  |                                                     |
| 3 | 104700564 | 1.05E+08 | KD2-H4K8ac_peak_21294 | 5.57044  |                                                     |
| 3 | 104711514 | 1.05E+08 | KD2-H4K8ac_peak_21295 | 7.12754  |                                                     |
| 3 | 105074188 | 1.05E+08 | KD2-H4K8ac_peak_21296 | 5.14125  |                                                     |

|   |           |          |                       |          |                                                       |
|---|-----------|----------|-----------------------|----------|-------------------------------------------------------|
| 3 | 105085058 | 1.05E+08 | KD2-H4K8ac_peak_21297 | 5.835    | ALCAM_ENSG00000170017                                 |
| 3 | 105587261 | 1.06E+08 | KD2-H4K8ac_peak_21298 | 7.49599  | CBLB_ENSG00000114423                                  |
| 3 | 105588046 | 1.06E+08 | KD2-H4K8ac_peak_21299 | 7.76329  | CBLB_ENSG00000114423                                  |
| 3 | 106117766 | 1.06E+08 | KD2-H4K8ac_peak_21300 | 5.57044  |                                                       |
| 3 | 106545155 | 1.07E+08 | KD2-H4K8ac_peak_21301 | 6.2159   |                                                       |
| 3 | 107149936 | 1.07E+08 | KD2-H4K8ac_peak_21302 | 14.80472 | RP11-115H18.1_ENSG00000273125                         |
| 3 | 107241207 | 1.07E+08 | KD2-H4K8ac_peak_21303 | 4.81242  | BBX_ENSG00000114439                                   |
| 3 | 107241907 | 1.07E+08 | KD2-H4K8ac_peak_21304 | 7.76329  | BBX_ENSG00000114439                                   |
| 3 | 107646176 | 1.08E+08 | KD2-H4K8ac_peak_21305 | 6.2781   |                                                       |
| 3 | 107706843 | 1.08E+08 | KD2-H4K8ac_peak_21306 | 12.85889 |                                                       |
| 3 | 107810032 | 1.08E+08 | KD2-H4K8ac_peak_21307 | 12.82393 | CD47_ENSG00000196776                                  |
| 3 | 108228709 | 1.08E+08 | KD2-H4K8ac_peak_21308 | 8.25022  |                                                       |
| 3 | 111578168 | 1.12E+08 | KD2-H4K8ac_peak_21309 | 5.13615  |                                                       |
| 3 | 111717651 | 1.12E+08 | KD2-H4K8ac_peak_21310 | 7.95563  |                                                       |
| 3 | 111718355 | 1.12E+08 | KD2-H4K8ac_peak_21311 | 4.67342  |                                                       |
| 3 | 111804734 | 1.12E+08 | KD2-H4K8ac_peak_21312 | 9.08816  | C3orf52_ENSG00000114529                               |
| 3 | 112022262 | 1.12E+08 | KD2-H4K8ac_peak_21313 | 6.64891  | RP11-90K6.1_ENSG00000239482                           |
| 3 | 112022745 | 1.12E+08 | KD2-H4K8ac_peak_21314 | 7.27716  |                                                       |
| 3 | 112052004 | 1.12E+08 | KD2-H4K8ac_peak_21315 | 9.11031  | CD200_ENSG00000091972                                 |
| 3 | 112052998 | 1.12E+08 | KD2-H4K8ac_peak_21316 | 6.66692  |                                                       |
| 3 | 112280504 | 1.12E+08 | KD2-H4K8ac_peak_21317 | 13.73635 | ATG3_ENSG00000144848;SLC35A5_ENSG00000138459          |
| 3 | 112280945 | 1.12E+08 | KD2-H4K8ac_peak_21318 | 7.70289  | ATG3_ENSG00000144848;SLC35A5_ENSG00000138459          |
| 3 | 112353870 | 1.12E+08 | KD2-H4K8ac_peak_21319 | 6.56926  |                                                       |
| 3 | 112361977 | 1.12E+08 | KD2-H4K8ac_peak_21320 | 7.63551  |                                                       |
| 3 | 112709480 | 1.13E+08 | KD2-H4K8ac_peak_21321 | 7.76329  | RP11-484K9.4_ENSG00000272844;GTPBP8_ENSG00000163607   |
| 3 | 112738705 | 1.13E+08 | KD2-H4K8ac_peak_21322 | 6.56211  | C3orf17_ENSG00000163608;RP11-572M11.4_ENSG00000240057 |
| 3 | 112867453 | 1.13E+08 | KD2-H4K8ac_peak_21323 | 8.30974  |                                                       |
| 3 | 112870699 | 1.13E+08 | KD2-H4K8ac_peak_21324 | 6.66692  |                                                       |
| 3 | 112883916 | 1.13E+08 | KD2-H4K8ac_peak_21325 | 13.09607 |                                                       |
| 3 | 112885085 | 1.13E+08 | KD2-H4K8ac_peak_21326 | 4.44748  |                                                       |
| 3 | 112888034 | 1.13E+08 | KD2-H4K8ac_peak_21327 | 6.56211  |                                                       |
| 3 | 112888699 | 1.13E+08 | KD2-H4K8ac_peak_21328 | 13.34404 |                                                       |
| 3 | 112911891 | 1.13E+08 | KD2-H4K8ac_peak_21329 | 6.16888  |                                                       |
| 3 | 112929747 | 1.13E+08 | KD2-H4K8ac_peak_21330 | 9.59147  | BOC_ENSG00000144857                                   |
| 3 | 112930486 | 1.13E+08 | KD2-H4K8ac_peak_21331 | 5.75757  | BOC_ENSG00000144857                                   |
| 3 | 112940614 | 1.13E+08 | KD2-H4K8ac_peak_21332 | 9.1707   |                                                       |
| 3 | 112960232 | 1.13E+08 | KD2-H4K8ac_peak_21333 | 6.30229  |                                                       |
| 3 | 112961171 | 1.13E+08 | KD2-H4K8ac_peak_21334 | 10.48739 |                                                       |
| 3 | 112967687 | 1.13E+08 | KD2-H4K8ac_peak_21335 | 5.51783  |                                                       |
| 3 | 112994700 | 1.13E+08 | KD2-H4K8ac_peak_21336 | 10.0692  |                                                       |
| 3 | 113251691 | 1.13E+08 | KD2-H4K8ac_peak_21337 | 7.76104  | SIDT1_ENSG00000072858                                 |
| 3 | 113464259 | 1.13E+08 | KD2-H4K8ac_peak_21338 | 11.22681 | NAA50_ENSG00000121579;ATP6V1A_ENSG00000114573         |
| 3 | 113666761 | 1.14E+08 | KD2-H4K8ac_peak_21339 | 11.05467 | RP11-255E6.6_ENSG00000273394;ZDHHC23_ENSG00000184307  |
| 3 | 113774946 | 1.14E+08 | KD2-H4K8ac_peak_21340 | 11.05407 | KIAA1407_ENSG00000163617                              |
| 3 | 113871465 | 1.14E+08 | KD2-H4K8ac_peak_21341 | 9.16531  |                                                       |
| 3 | 114119435 | 1.14E+08 | KD2-H4K8ac_peak_21342 | 9.15329  |                                                       |

|   |           |          |                       |          |                                                     |
|---|-----------|----------|-----------------------|----------|-----------------------------------------------------|
| 3 | 114129489 | 1.14E+08 | KD2-H4K8ac_peak_21343 | 6.16888  |                                                     |
| 3 | 114173218 | 1.14E+08 | KD2-H4K8ac_peak_21344 | 3.75035  | RP11-197K3.1_ENSG00000242290                        |
| 3 | 114343460 | 1.14E+08 | KD2-H4K8ac_peak_21345 | 4.01115  |                                                     |
| 3 | 114865408 | 1.15E+08 | KD2-H4K8ac_peak_21346 | 12.42547 | ZBTB20_ENSG00000181722                              |
| 3 | 114866765 | 1.15E+08 | KD2-H4K8ac_peak_21347 | 7.12754  | ZBTB20_ENSG00000181722                              |
| 3 | 115113612 | 1.15E+08 | KD2-H4K8ac_peak_21348 | 4.01115  |                                                     |
| 3 | 115238449 | 1.15E+08 | KD2-H4K8ac_peak_21349 | 5.57044  |                                                     |
| 3 | 115377390 | 1.15E+08 | KD2-H4K8ac_peak_21350 | 18.31034 | RP11-326J18.1_ENSG00000241596                       |
| 3 | 115427483 | 1.15E+08 | KD2-H4K8ac_peak_21351 | 8.30974  |                                                     |
| 3 | 115430389 | 1.15E+08 | KD2-H4K8ac_peak_21352 | 9.11818  |                                                     |
| 3 | 115503065 | 1.16E+08 | KD2-H4K8ac_peak_21353 | 6.84261  |                                                     |
| 3 | 115837090 | 1.16E+08 | KD2-H4K8ac_peak_21354 | 7.12754  |                                                     |
| 3 | 115851024 | 1.16E+08 | KD2-H4K8ac_peak_21355 | 7.12754  |                                                     |
| 3 | 115855600 | 1.16E+08 | KD2-H4K8ac_peak_21356 | 4.37708  |                                                     |
| 3 | 116649238 | 1.17E+08 | KD2-H4K8ac_peak_21357 | 14.29602 |                                                     |
| 3 | 116739985 | 1.17E+08 | KD2-H4K8ac_peak_21358 | 6.40683  |                                                     |
| 3 | 117250099 | 1.17E+08 | KD2-H4K8ac_peak_21359 | 8.1233   |                                                     |
| 3 | 117640125 | 1.18E+08 | KD2-H4K8ac_peak_21360 | 6.82976  |                                                     |
| 3 | 117641104 | 1.18E+08 | KD2-H4K8ac_peak_21361 | 6.16888  |                                                     |
| 3 | 117648287 | 1.18E+08 | KD2-H4K8ac_peak_21362 | 7.0983   |                                                     |
| 3 | 117715820 | 1.18E+08 | KD2-H4K8ac_peak_21363 | 11.60333 | LSAMP_ENSG00000185565;RP11-384F7.2_ENSG00000239268  |
| 3 | 118220013 | 1.18E+08 | KD2-H4K8ac_peak_21364 | 5.88845  |                                                     |
| 3 | 118959453 | 1.19E+08 | KD2-H4K8ac_peak_21365 | 5.88845  | B4GALT4_ENSG00000121578                             |
| 3 | 118995100 | 1.19E+08 | KD2-H4K8ac_peak_21366 | 4.77079  |                                                     |
| 3 | 119011535 | 1.19E+08 | KD2-H4K8ac_peak_21367 | 6.99815  |                                                     |
| 3 | 119012866 | 1.19E+08 | KD2-H4K8ac_peak_21368 | 14.275   | ARHGAP31_ENSG00000031081                            |
| 3 | 119041348 | 1.19E+08 | KD2-H4K8ac_peak_21369 | 12.74171 | ARHGAP31-AS1_ENSG00000241155                        |
| 3 | 119050679 | 1.19E+08 | KD2-H4K8ac_peak_21370 | 8.83582  |                                                     |
| 3 | 119051103 | 1.19E+08 | KD2-H4K8ac_peak_21371 | 11.92978 |                                                     |
| 3 | 119052924 | 1.19E+08 | KD2-H4K8ac_peak_21372 | 13.09607 |                                                     |
| 3 | 119078390 | 1.19E+08 | KD2-H4K8ac_peak_21373 | 7.13615  |                                                     |
| 3 | 119080429 | 1.19E+08 | KD2-H4K8ac_peak_21374 | 6.2781   |                                                     |
| 3 | 119083431 | 1.19E+08 | KD2-H4K8ac_peak_21375 | 4.86324  |                                                     |
| 3 | 119085586 | 1.19E+08 | KD2-H4K8ac_peak_21376 | 6.40683  |                                                     |
| 3 | 119182157 | 1.19E+08 | KD2-H4K8ac_peak_21377 | 10.05606 |                                                     |
| 3 | 119182684 | 1.19E+08 | KD2-H4K8ac_peak_21378 | 8.00457  |                                                     |
| 3 | 119187540 | 1.19E+08 | KD2-H4K8ac_peak_21379 | 9.63487  | TMEM39A_ENSG00000176142                             |
| 3 | 119270711 | 1.19E+08 | KD2-H4K8ac_peak_21380 | 5.15777  |                                                     |
| 3 | 119298303 | 1.19E+08 | KD2-H4K8ac_peak_21381 | 10.96455 | RP11-190C22.9_ENSG00000272967;ADPRH_ENSG00000144843 |
| 3 | 119349556 | 1.19E+08 | KD2-H4K8ac_peak_21382 | 3.80759  |                                                     |
| 3 | 119351829 | 1.19E+08 | KD2-H4K8ac_peak_21383 | 9.27888  |                                                     |
| 3 | 119356057 | 1.19E+08 | KD2-H4K8ac_peak_21384 | 8.86391  |                                                     |
| 3 | 119357277 | 1.19E+08 | KD2-H4K8ac_peak_21385 | 8.17902  |                                                     |
| 3 | 119359451 | 1.19E+08 | KD2-H4K8ac_peak_21386 | 20.09573 |                                                     |
| 3 | 119378783 | 1.19E+08 | KD2-H4K8ac_peak_21387 | 15.22643 |                                                     |
| 3 | 119422170 | 1.19E+08 | KD2-H4K8ac_peak_21388 | 9.96798  | MAATS1_ENSG00000183833                              |

|   |           |          |                       |          |                                                                                    |
|---|-----------|----------|-----------------------|----------|------------------------------------------------------------------------------------|
| 3 | 119812790 | 1.2E+08  | KD2-H4K8ac_peak_21389 | 14.8083  | GSK3B_ENSG00000082701;RP11-18H7.1_ENSG000000242622                                 |
| 3 | 119814151 | 1.2E+08  | KD2-H4K8ac_peak_21390 | 24.8283  | GSK3B_ENSG00000082701;RP11-18H7.1_ENSG000000242622                                 |
| 3 | 120003865 | 1.2E+08  | KD2-H4K8ac_peak_21391 | 13.70605 | GPR156_ENSG000000175697                                                            |
| 3 | 120067705 | 1.2E+08  | KD2-H4K8ac_peak_21392 | 6.16883  | LRRCS58_ENSG000000163428;RP11-174O3.3_ENSG000000240661                             |
| 3 | 120069605 | 1.2E+08  | KD2-H4K8ac_peak_21393 | 9.02573  |                                                                                    |
| 3 | 120169736 | 1.2E+08  | KD2-H4K8ac_peak_21394 | 10.43145 | FSTL1_ENSG000000163430                                                             |
| 3 | 120278135 | 1.2E+08  | KD2-H4K8ac_peak_21395 | 4.67342  |                                                                                    |
| 3 | 120461105 | 1.2E+08  | KD2-H4K8ac_peak_21396 | 17.16047 | RABL3_ENSG000000144840;GTF2E1_ENSG000000153767                                     |
| 3 | 121468086 | 1.21E+08 | KD2-H4K8ac_peak_21397 | 8.55271  | GOLGB1_ENSG000000173230                                                            |
| 3 | 122101854 | 1.22E+08 | KD2-H4K8ac_peak_21398 | 13.92307 | CCDC58_ENSG000000160124;FAM162A_ENSG000000114023                                   |
| 3 | 122135147 | 1.22E+08 | KD2-H4K8ac_peak_21399 | 7.20567  | WDR5B_ENSG000000196981;RP11-299J3.8_ENSG000000272758;RP11-299J3.6_ENSG000000242531 |
| 3 | 122135606 | 1.22E+08 | KD2-H4K8ac_peak_21400 | 4.86324  | WDR5B_ENSG000000196981;RP11-299J3.8_ENSG000000272758;RP11-299J3.6_ENSG000000242531 |
| 3 | 122282485 | 1.22E+08 | KD2-H4K8ac_peak_21401 | 17.43705 | PARP9_ENSG000000138496;DTX3L_ENSG000000163840                                      |
| 3 | 122399637 | 1.22E+08 | KD2-H4K8ac_peak_21402 | 10.46264 | PARP14_ENSG000000173193                                                            |
| 3 | 122512358 | 1.23E+08 | KD2-H4K8ac_peak_21403 | 6.99815  | HSPBAP1_ENSG000000169087                                                           |
| 3 | 122513956 | 1.23E+08 | KD2-H4K8ac_peak_21404 | 12.93209 | DIRC2_ENSG000000138463                                                             |
| 3 | 122647643 | 1.23E+08 | KD2-H4K8ac_peak_21405 | 15.14522 |                                                                                    |
| 3 | 122649084 | 1.23E+08 | KD2-H4K8ac_peak_21406 | 5.9696   |                                                                                    |
| 3 | 122654652 | 1.23E+08 | KD2-H4K8ac_peak_21407 | 9.70057  |                                                                                    |
| 3 | 122656087 | 1.23E+08 | KD2-H4K8ac_peak_21408 | 9.44423  |                                                                                    |
| 3 | 122659977 | 1.23E+08 | KD2-H4K8ac_peak_21409 | 12.65397 |                                                                                    |
| 3 | 122691966 | 1.23E+08 | KD2-H4K8ac_peak_21410 | 7.47462  |                                                                                    |
| 3 | 122693984 | 1.23E+08 | KD2-H4K8ac_peak_21411 | 7.76329  |                                                                                    |
| 3 | 122695014 | 1.23E+08 | KD2-H4K8ac_peak_21412 | 4.57699  |                                                                                    |
| 3 | 122695545 | 1.23E+08 | KD2-H4K8ac_peak_21413 | 6.66692  |                                                                                    |
| 3 | 122697399 | 1.23E+08 | KD2-H4K8ac_peak_21414 | 4.06758  |                                                                                    |
| 3 | 122711882 | 1.23E+08 | KD2-H4K8ac_peak_21415 | 4.54006  |                                                                                    |
| 3 | 122715633 | 1.23E+08 | KD2-H4K8ac_peak_21416 | 6.83936  |                                                                                    |
| 3 | 122745720 | 1.23E+08 | KD2-H4K8ac_peak_21417 | 6.24114  |                                                                                    |
| 3 | 122746817 | 1.23E+08 | KD2-H4K8ac_peak_21418 | 10.19949 | SEMA5B_ENSG000000082684                                                            |
| 3 | 122785943 | 1.23E+08 | KD2-H4K8ac_peak_21419 | 12.70959 | PDIA5_ENSG000000065485                                                             |
| 3 | 122800924 | 1.23E+08 | KD2-H4K8ac_peak_21420 | 13.34404 |                                                                                    |
| 3 | 122803077 | 1.23E+08 | KD2-H4K8ac_peak_21421 | 3.75035  |                                                                                    |
| 3 | 122803888 | 1.23E+08 | KD2-H4K8ac_peak_21422 | 10.0692  |                                                                                    |
| 3 | 122872662 | 1.23E+08 | KD2-H4K8ac_peak_21423 | 7.89389  |                                                                                    |
| 3 | 122920248 | 1.23E+08 | KD2-H4K8ac_peak_21424 | 6.65673  | SEC22A_ENSG000000121542                                                            |
| 3 | 122920849 | 1.23E+08 | KD2-H4K8ac_peak_21425 | 13.3695  | SEC22A_ENSG000000121542                                                            |
| 3 | 123303575 | 1.23E+08 | KD2-H4K8ac_peak_21426 | 12.57143 | PTPLB_ENSG000000206527;MYLK-AS1_ENSG000000239523                                   |
| 3 | 123304153 | 1.23E+08 | KD2-H4K8ac_peak_21427 | 5.72327  | PTPLB_ENSG000000206527;MYLK-AS1_ENSG000000239523                                   |
| 3 | 123492481 | 1.23E+08 | KD2-H4K8ac_peak_21428 | 5.25071  |                                                                                    |
| 3 | 123602644 | 1.24E+08 | KD2-H4K8ac_peak_21429 | 4.42765  | MYLK_ENSG00000065534                                                               |
| 3 | 123751418 | 1.24E+08 | KD2-H4K8ac_peak_21430 | 16.49944 |                                                                                    |
| 3 | 123752199 | 1.24E+08 | KD2-H4K8ac_peak_21431 | 29.22161 |                                                                                    |
| 3 | 123779510 | 1.24E+08 | KD2-H4K8ac_peak_21432 | 9.31907  |                                                                                    |
| 3 | 123876617 | 1.24E+08 | KD2-H4K8ac_peak_21433 | 9.15329  |                                                                                    |
| 3 | 123894045 | 1.24E+08 | KD2-H4K8ac_peak_21434 | 7.0754   |                                                                                    |

|   |           |          |                       |          |                              |
|---|-----------|----------|-----------------------|----------|------------------------------|
| 3 | 124001690 | 1.24E+08 | KD2-H4K8ac_peak_21435 | 10.81728 |                              |
| 3 | 124015387 | 1.24E+08 | KD2-H4K8ac_peak_21436 | 6.66692  |                              |
| 3 | 124017419 | 1.24E+08 | KD2-H4K8ac_peak_21437 | 9.51625  |                              |
| 3 | 124035897 | 1.24E+08 | KD2-H4K8ac_peak_21438 | 7.22457  |                              |
| 3 | 124039265 | 1.24E+08 | KD2-H4K8ac_peak_21439 | 5.57044  |                              |
| 3 | 124085604 | 1.24E+08 | KD2-H4K8ac_peak_21440 | 5.19569  |                              |
| 3 | 124449498 | 1.24E+08 | KD2-H4K8ac_peak_21441 | 5.88845  | UMPS_ENSG00000114491         |
| 3 | 124490251 | 1.24E+08 | KD2-H4K8ac_peak_21442 | 6.22746  |                              |
| 3 | 124491839 | 1.24E+08 | KD2-H4K8ac_peak_21443 | 5.88845  |                              |
| 3 | 124492395 | 1.24E+08 | KD2-H4K8ac_peak_21444 | 5.30799  |                              |
| 3 | 124553744 | 1.25E+08 | KD2-H4K8ac_peak_21445 | 7.28827  |                              |
| 3 | 124605321 | 1.25E+08 | KD2-H4K8ac_peak_21446 | 4.86324  |                              |
| 3 | 124606343 | 1.25E+08 | KD2-H4K8ac_peak_21447 | 7.44324  |                              |
| 3 | 124762523 | 1.25E+08 | KD2-H4K8ac_peak_21448 | 3.97079  |                              |
| 3 | 124774454 | 1.25E+08 | KD2-H4K8ac_peak_21449 | 9.402    | HEG1_ENSG00000173706         |
| 3 | 124839458 | 1.25E+08 | KD2-H4K8ac_peak_21450 | 6.65673  |                              |
| 3 | 124860151 | 1.25E+08 | KD2-H4K8ac_peak_21451 | 17.70837 |                              |
| 3 | 125093364 | 1.25E+08 | KD2-H4K8ac_peak_21452 | 6.5996   | ZNF148_ENSG00000163848       |
| 3 | 125093944 | 1.25E+08 | KD2-H4K8ac_peak_21453 | 17.43705 | ZNF148_ENSG00000163848       |
| 3 | 125238825 | 1.25E+08 | KD2-H4K8ac_peak_21454 | 13.34404 | SNX4_ENSG00000114520         |
| 3 | 125315335 | 1.25E+08 | KD2-H4K8ac_peak_21455 | 7.05051  |                              |
| 3 | 125477556 | 1.25E+08 | KD2-H4K8ac_peak_21456 | 8.30974  |                              |
| 3 | 125634345 | 1.26E+08 | KD2-H4K8ac_peak_21457 | 6.25869  | FAM86JP_ENSG00000171084      |
| 3 | 125709369 | 1.26E+08 | KD2-H4K8ac_peak_21458 | 8.17902  |                              |
| 3 | 125802344 | 1.26E+08 | KD2-H4K8ac_peak_21459 | 8.55271  | RP11-124N2.1_ENSG00000250012 |
| 3 | 125819782 | 1.26E+08 | KD2-H4K8ac_peak_21460 | 4.59928  | SLC41A3_ENSG00000114544      |
| 3 | 125889965 | 1.26E+08 | KD2-H4K8ac_peak_21461 | 7.12754  |                              |
| 3 | 125900064 | 1.26E+08 | KD2-H4K8ac_peak_21462 | 4.42765  |                              |
| 3 | 125931540 | 1.26E+08 | KD2-H4K8ac_peak_21463 | 14.8083  |                              |
| 3 | 125979945 | 1.26E+08 | KD2-H4K8ac_peak_21464 | 6.61376  |                              |
| 3 | 125986133 | 1.26E+08 | KD2-H4K8ac_peak_21465 | 5.88845  | RP11-71E19.1_ENSG00000250934 |
| 3 | 125986556 | 1.26E+08 | KD2-H4K8ac_peak_21466 | 4.12757  | RP11-71E19.1_ENSG00000250934 |
| 3 | 126006272 | 1.26E+08 | KD2-H4K8ac_peak_21467 | 5.88845  |                              |
| 3 | 126074274 | 1.26E+08 | KD2-H4K8ac_peak_21468 | 9.34989  |                              |
| 3 | 126075103 | 1.26E+08 | KD2-H4K8ac_peak_21469 | 5.85704  | KLF15_ENSG00000163884        |
| 3 | 126107866 | 1.26E+08 | KD2-H4K8ac_peak_21470 | 11.43353 |                              |
| 3 | 126194474 | 1.26E+08 | KD2-H4K8ac_peak_21471 | 24.48793 | ZXDC_ENSG00000070476         |
| 3 | 126195228 | 1.26E+08 | KD2-H4K8ac_peak_21472 | 5.53033  | ZXDC_ENSG00000070476         |
| 3 | 126200066 | 1.26E+08 | KD2-H4K8ac_peak_21473 | 6.25869  |                              |
| 3 | 126248004 | 1.26E+08 | KD2-H4K8ac_peak_21474 | 7.82935  |                              |
| 3 | 126373293 | 1.26E+08 | KD2-H4K8ac_peak_21475 | 12.84642 | TXNRD3_ENSG00000197763       |
| 3 | 126397613 | 1.26E+08 | KD2-H4K8ac_peak_21476 | 9.15069  |                              |
| 3 | 126398336 | 1.26E+08 | KD2-H4K8ac_peak_21477 | 7.76329  |                              |
| 3 | 126402549 | 1.26E+08 | KD2-H4K8ac_peak_21478 | 9.27888  |                              |
| 3 | 126423193 | 1.26E+08 | KD2-H4K8ac_peak_21479 | 4.36736  | CHCHD6_ENSG00000159685       |
| 3 | 126645910 | 1.27E+08 | KD2-H4K8ac_peak_21480 | 7.27716  |                              |

|   |           |          |                       |          |                                            |
|---|-----------|----------|-----------------------|----------|--------------------------------------------|
| 3 | 126656252 | 1.27E+08 | KD2-H4K8ac_peak_21481 | 5.20908  |                                            |
| 3 | 126678401 | 1.27E+08 | KD2-H4K8ac_peak_21482 | 5.13615  |                                            |
| 3 | 126690642 | 1.27E+08 | KD2-H4K8ac_peak_21483 | 5.57044  |                                            |
| 3 | 126701241 | 1.27E+08 | KD2-H4K8ac_peak_21484 | 8.16906  |                                            |
| 3 | 126702242 | 1.27E+08 | KD2-H4K8ac_peak_21485 | 4.76709  |                                            |
| 3 | 126719983 | 1.27E+08 | KD2-H4K8ac_peak_21486 | 12.44942 |                                            |
| 3 | 126721278 | 1.27E+08 | KD2-H4K8ac_peak_21487 | 8.85813  |                                            |
| 3 | 126726946 | 1.27E+08 | KD2-H4K8ac_peak_21488 | 5.47227  |                                            |
| 3 | 126729324 | 1.27E+08 | KD2-H4K8ac_peak_21489 | 9.56573  |                                            |
| 3 | 126730558 | 1.27E+08 | KD2-H4K8ac_peak_21490 | 8.7723   |                                            |
| 3 | 126733598 | 1.27E+08 | KD2-H4K8ac_peak_21491 | 5.90414  |                                            |
| 3 | 126792003 | 1.27E+08 | KD2-H4K8ac_peak_21492 | 5.9696   |                                            |
| 3 | 126807566 | 1.27E+08 | KD2-H4K8ac_peak_21493 | 6.72624  |                                            |
| 3 | 126852911 | 1.27E+08 | KD2-H4K8ac_peak_21494 | 11.68645 |                                            |
| 3 | 126854552 | 1.27E+08 | KD2-H4K8ac_peak_21495 | 9.18237  |                                            |
| 3 | 126889902 | 1.27E+08 | KD2-H4K8ac_peak_21496 | 11.90231 |                                            |
| 3 | 126892333 | 1.27E+08 | KD2-H4K8ac_peak_21497 | 13.83097 |                                            |
| 3 | 127023465 | 1.27E+08 | KD2-H4K8ac_peak_21498 | 7.59643  |                                            |
| 3 | 127089718 | 1.27E+08 | KD2-H4K8ac_peak_21499 | 7.70289  |                                            |
| 3 | 127145075 | 1.27E+08 | KD2-H4K8ac_peak_21500 | 5.64449  |                                            |
| 3 | 127174024 | 1.27E+08 | KD2-H4K8ac_peak_21501 | 5.54647  |                                            |
| 3 | 127174715 | 1.27E+08 | KD2-H4K8ac_peak_21502 | 9.6247   |                                            |
| 3 | 127265988 | 1.27E+08 | KD2-H4K8ac_peak_21503 | 7.146    |                                            |
| 3 | 127271089 | 1.27E+08 | KD2-H4K8ac_peak_21504 | 6.09229  |                                            |
| 3 | 127294211 | 1.27E+08 | KD2-H4K8ac_peak_21505 | 5.54647  |                                            |
| 3 | 127309781 | 1.27E+08 | KD2-H4K8ac_peak_21506 | 15.81711 |                                            |
| 3 | 127316666 | 1.27E+08 | KD2-H4K8ac_peak_21507 | 13.70753 | TPRA1_ENSG00000163870;MCM2_ENSG00000073111 |
| 3 | 127348065 | 1.27E+08 | KD2-H4K8ac_peak_21508 | 14.45402 | PODXL2_ENSG00000114631                     |
| 3 | 127390755 | 1.27E+08 | KD2-H4K8ac_peak_21509 | 15.59774 | ABTB1_ENSG00000114626                      |
| 3 | 127391977 | 1.27E+08 | KD2-H4K8ac_peak_21510 | 6.99815  | ABTB1_ENSG00000114626                      |
| 3 | 127406924 | 1.27E+08 | KD2-H4K8ac_peak_21511 | 9.51625  |                                            |
| 3 | 127408063 | 1.27E+08 | KD2-H4K8ac_peak_21512 | 12.16946 |                                            |
| 3 | 127414817 | 1.27E+08 | KD2-H4K8ac_peak_21513 | 7.95563  |                                            |
| 3 | 127415440 | 1.27E+08 | KD2-H4K8ac_peak_21514 | 13.27022 |                                            |
| 3 | 127417665 | 1.27E+08 | KD2-H4K8ac_peak_21515 | 6.40297  |                                            |
| 3 | 127425723 | 1.27E+08 | KD2-H4K8ac_peak_21516 | 7.27716  |                                            |
| 3 | 127436288 | 1.27E+08 | KD2-H4K8ac_peak_21517 | 6.33462  |                                            |
| 3 | 127462595 | 1.27E+08 | KD2-H4K8ac_peak_21518 | 4.9025   |                                            |
| 3 | 127500572 | 1.28E+08 | KD2-H4K8ac_peak_21519 | 12.13163 |                                            |
| 3 | 127503297 | 1.28E+08 | KD2-H4K8ac_peak_21520 | 20.0792  |                                            |
| 3 | 127505601 | 1.28E+08 | KD2-H4K8ac_peak_21521 | 9.63487  |                                            |
| 3 | 127506214 | 1.28E+08 | KD2-H4K8ac_peak_21522 | 9.1707   |                                            |
| 3 | 127515952 | 1.28E+08 | KD2-H4K8ac_peak_21523 | 4.01115  |                                            |
| 3 | 127542272 | 1.28E+08 | KD2-H4K8ac_peak_21524 | 7.96322  |                                            |
| 3 | 127725106 | 1.28E+08 | KD2-H4K8ac_peak_21525 | 8.17902  |                                            |
| 3 | 127740845 | 1.28E+08 | KD2-H4K8ac_peak_21526 | 4.37708  |                                            |



|   |           |          |                       |          |                                               |
|---|-----------|----------|-----------------------|----------|-----------------------------------------------|
| 3 | 127771359 | 1.28E+08 | KD2-H4K8ac_peak_21527 | 4.44527  | SEC61A1_ENSG00000058262                       |
| 3 | 127842337 | 1.28E+08 | KD2-H4K8ac_peak_21528 | 5.9696   |                                               |
| 3 | 127842997 | 1.28E+08 | KD2-H4K8ac_peak_21529 | 14.29602 |                                               |
| 3 | 127872380 | 1.28E+08 | KD2-H4K8ac_peak_21530 | 10.0692  | RUVBL1_ENSG00000175792;EEFSEC_ENSG00000132394 |
| 3 | 127886290 | 1.28E+08 | KD2-H4K8ac_peak_21531 | 6.60096  |                                               |
| 3 | 127888145 | 1.28E+08 | KD2-H4K8ac_peak_21532 | 4.64388  |                                               |
| 3 | 127953132 | 1.28E+08 | KD2-H4K8ac_peak_21533 | 3.93917  |                                               |
| 3 | 127955556 | 1.28E+08 | KD2-H4K8ac_peak_21534 | 7.61026  |                                               |
| 3 | 127957809 | 1.28E+08 | KD2-H4K8ac_peak_21535 | 5.9696   |                                               |
| 3 | 127983030 | 1.28E+08 | KD2-H4K8ac_peak_21536 | 8.02571  |                                               |
| 3 | 127994801 | 1.28E+08 | KD2-H4K8ac_peak_21537 | 5.96443  |                                               |
| 3 | 127995649 | 1.28E+08 | KD2-H4K8ac_peak_21538 | 7.11824  |                                               |
| 3 | 127996407 | 1.28E+08 | KD2-H4K8ac_peak_21539 | 16.822   |                                               |
| 3 | 127998116 | 1.28E+08 | KD2-H4K8ac_peak_21540 | 16.3889  |                                               |
| 3 | 127999214 | 1.28E+08 | KD2-H4K8ac_peak_21541 | 8.73351  |                                               |
| 3 | 128000755 | 1.28E+08 | KD2-H4K8ac_peak_21542 | 10.19949 |                                               |
| 3 | 128001756 | 1.28E+08 | KD2-H4K8ac_peak_21543 | 11.89502 |                                               |
| 3 | 128005943 | 1.28E+08 | KD2-H4K8ac_peak_21544 | 5.71749  |                                               |
| 3 | 128035901 | 1.28E+08 | KD2-H4K8ac_peak_21545 | 8.09231  |                                               |
| 3 | 128036455 | 1.28E+08 | KD2-H4K8ac_peak_21546 | 9.61895  |                                               |
| 3 | 128073885 | 1.28E+08 | KD2-H4K8ac_peak_21547 | 4.06758  |                                               |
| 3 | 128113492 | 1.28E+08 | KD2-H4K8ac_peak_21548 | 10.77651 |                                               |
| 3 | 128116045 | 1.28E+08 | KD2-H4K8ac_peak_21549 | 4.85062  |                                               |
| 3 | 128117379 | 1.28E+08 | KD2-H4K8ac_peak_21550 | 12.58841 |                                               |
| 3 | 128118496 | 1.28E+08 | KD2-H4K8ac_peak_21551 | 6.99815  |                                               |
| 3 | 128124788 | 1.28E+08 | KD2-H4K8ac_peak_21552 | 7.3948   |                                               |
| 3 | 128125899 | 1.28E+08 | KD2-H4K8ac_peak_21553 | 8.80432  |                                               |
| 3 | 128128399 | 1.28E+08 | KD2-H4K8ac_peak_21554 | 24.91915 |                                               |
| 3 | 128130808 | 1.28E+08 | KD2-H4K8ac_peak_21555 | 23.04547 |                                               |
| 3 | 128131769 | 1.28E+08 | KD2-H4K8ac_peak_21556 | 13.22555 |                                               |
| 3 | 128133876 | 1.28E+08 | KD2-H4K8ac_peak_21557 | 5.4779   |                                               |
| 3 | 128134455 | 1.28E+08 | KD2-H4K8ac_peak_21558 | 6.8713   |                                               |
| 3 | 128135029 | 1.28E+08 | KD2-H4K8ac_peak_21559 | 6.66359  |                                               |
| 3 | 128139703 | 1.28E+08 | KD2-H4K8ac_peak_21560 | 8.23274  |                                               |
| 3 | 128144116 | 1.28E+08 | KD2-H4K8ac_peak_21561 | 4.93687  |                                               |
| 3 | 128144920 | 1.28E+08 | KD2-H4K8ac_peak_21562 | 13.81781 |                                               |
| 3 | 128146410 | 1.28E+08 | KD2-H4K8ac_peak_21563 | 4.86324  |                                               |
| 3 | 128151200 | 1.28E+08 | KD2-H4K8ac_peak_21564 | 7.6718   |                                               |
| 3 | 128154043 | 1.28E+08 | KD2-H4K8ac_peak_21565 | 8.55271  |                                               |
| 3 | 128173276 | 1.28E+08 | KD2-H4K8ac_peak_21566 | 10.21366 |                                               |
| 3 | 128174742 | 1.28E+08 | KD2-H4K8ac_peak_21567 | 29.36444 |                                               |
| 3 | 128176364 | 1.28E+08 | KD2-H4K8ac_peak_21568 | 21.07675 |                                               |
| 3 | 128178305 | 1.28E+08 | KD2-H4K8ac_peak_21569 | 10.73134 |                                               |
| 3 | 128186081 | 1.28E+08 | KD2-H4K8ac_peak_21570 | 12.57865 | DNAJB8_ENSG00000179407                        |
| 3 | 128187769 | 1.28E+08 | KD2-H4K8ac_peak_21571 | 15.76765 |                                               |
| 3 | 128189358 | 1.28E+08 | KD2-H4K8ac_peak_21572 | 12.57297 |                                               |

|   |           |          |                       |          |                                                    |
|---|-----------|----------|-----------------------|----------|----------------------------------------------------|
| 3 | 128194076 | 1.28E+08 | KD2-H4K8ac_peak_21573 | 7.99241  |                                                    |
| 3 | 128200966 | 1.28E+08 | KD2-H4K8ac_peak_21574 | 6.27719  |                                                    |
| 3 | 128201674 | 1.28E+08 | KD2-H4K8ac_peak_21575 | 7.76329  |                                                    |
| 3 | 128202376 | 1.28E+08 | KD2-H4K8ac_peak_21576 | 4.37809  |                                                    |
| 3 | 128205883 | 1.28E+08 | KD2-H4K8ac_peak_21577 | 6.24992  |                                                    |
| 3 | 128206519 | 1.28E+08 | KD2-H4K8ac_peak_21578 | 12.14719 |                                                    |
| 3 | 128207326 | 1.28E+08 | KD2-H4K8ac_peak_21579 | 6.75585  | RP11-475N22.4_ENSG00000244300                      |
| 3 | 128207783 | 1.28E+08 | KD2-H4K8ac_peak_21580 | 14.06758 | RP11-475N22.4_ENSG00000244300                      |
| 3 | 128209827 | 1.28E+08 | KD2-H4K8ac_peak_21581 | 6.60096  |                                                    |
| 3 | 128210376 | 1.28E+08 | KD2-H4K8ac_peak_21582 | 13.018   | GATA2_ENSG00000179348                              |
| 3 | 128212197 | 1.28E+08 | KD2-H4K8ac_peak_21583 | 9.1707   | GATA2_ENSG00000179348                              |
| 3 | 128214585 | 1.28E+08 | KD2-H4K8ac_peak_21584 | 11.03331 |                                                    |
| 3 | 128215191 | 1.28E+08 | KD2-H4K8ac_peak_21585 | 13.73635 |                                                    |
| 3 | 128236554 | 1.28E+08 | KD2-H4K8ac_peak_21586 | 6.1228   |                                                    |
| 3 | 128268144 | 1.28E+08 | KD2-H4K8ac_peak_21587 | 8.10216  |                                                    |
| 3 | 128303280 | 1.28E+08 | KD2-H4K8ac_peak_21588 | 5.9696   |                                                    |
| 3 | 128326745 | 1.28E+08 | KD2-H4K8ac_peak_21589 | 8.30974  |                                                    |
| 3 | 128336040 | 1.28E+08 | KD2-H4K8ac_peak_21590 | 15.58442 |                                                    |
| 3 | 128336745 | 1.28E+08 | KD2-H4K8ac_peak_21591 | 12.70983 |                                                    |
| 3 | 128369154 | 1.28E+08 | KD2-H4K8ac_peak_21592 | 13.13969 |                                                    |
| 3 | 128369988 | 1.28E+08 | KD2-H4K8ac_peak_21593 | 10.96455 |                                                    |
| 3 | 128370496 | 1.28E+08 | KD2-H4K8ac_peak_21594 | 4.26087  |                                                    |
| 3 | 128398832 | 1.28E+08 | KD2-H4K8ac_peak_21595 | 10.59312 | RPN1_ENSG00000163902                               |
| 3 | 128399744 | 1.28E+08 | KD2-H4K8ac_peak_21596 | 6.97919  | RPN1_ENSG00000163902                               |
| 3 | 128400335 | 1.28E+08 | KD2-H4K8ac_peak_21597 | 4.98072  | RPN1_ENSG00000163902                               |
| 3 | 128420254 | 1.28E+08 | KD2-H4K8ac_peak_21598 | 8.10216  |                                                    |
| 3 | 128421190 | 1.28E+08 | KD2-H4K8ac_peak_21599 | 6.1846   |                                                    |
| 3 | 128444476 | 1.28E+08 | KD2-H4K8ac_peak_21600 | 9.34989  | RAB7A_ENSG00000075785                              |
| 3 | 128445104 | 1.28E+08 | KD2-H4K8ac_peak_21601 | 10.19949 | RAB7A_ENSG00000075785                              |
| 3 | 128564581 | 1.29E+08 | KD2-H4K8ac_peak_21602 | 7.07117  |                                                    |
| 3 | 128583168 | 1.29E+08 | KD2-H4K8ac_peak_21603 | 9.16531  |                                                    |
| 3 | 128598512 | 1.29E+08 | KD2-H4K8ac_peak_21604 | 9.07715  | ACAD9_ENSG00000177646                              |
| 3 | 128712431 | 1.29E+08 | KD2-H4K8ac_peak_21605 | 10.0692  |                                                    |
| 3 | 128780790 | 1.29E+08 | KD2-H4K8ac_peak_21606 | 5.57044  |                                                    |
| 3 | 128840884 | 1.29E+08 | KD2-H4K8ac_peak_21607 | 8.70727  | RAB43_ENSG00000172780;RP11-434H6.6_ENSG00000273174 |
| 3 | 128880053 | 1.29E+08 | KD2-H4K8ac_peak_21608 | 6.66692  | ISY1-RAB43_ENSG00000261796;ISY1_ENSG00000240682    |
| 3 | 128902002 | 1.29E+08 | KD2-H4K8ac_peak_21609 | 7.07117  | CNBP_ENSG00000169714                               |
| 3 | 128902958 | 1.29E+08 | KD2-H4K8ac_peak_21610 | 8.85813  | CNBP_ENSG00000169714                               |
| 3 | 128997130 | 1.29E+08 | KD2-H4K8ac_peak_21611 | 8.26945  | HMCES_ENSG00000183624                              |
| 3 | 129033566 | 1.29E+08 | KD2-H4K8ac_peak_21612 | 6.40683  | H1FX-AS1_ENSG00000206417                           |
| 3 | 129033971 | 1.29E+08 | KD2-H4K8ac_peak_21613 | 13.12288 | H1FX_ENSG00000184897;H1FX-AS1_ENSG00000206417      |
| 3 | 129035375 | 1.29E+08 | KD2-H4K8ac_peak_21614 | 16.87121 | H1FX_ENSG00000184897                               |
| 3 | 129085134 | 1.29E+08 | KD2-H4K8ac_peak_21615 | 7.1181   |                                                    |
| 3 | 129104654 | 1.29E+08 | KD2-H4K8ac_peak_21616 | 4.42765  |                                                    |
| 3 | 129158556 | 1.29E+08 | KD2-H4K8ac_peak_21617 | 8.4716   | MBD4_ENSG00000129071;IFT122_ENSG00000163913        |
| 3 | 129159197 | 1.29E+08 | KD2-H4K8ac_peak_21618 | 7.52168  | MBD4_ENSG00000129071;IFT122_ENSG00000163913        |

|   |           |          |                       |          |                                                      |
|---|-----------|----------|-----------------------|----------|------------------------------------------------------|
| 3 | 129276773 | 1.29E+08 | KD2-H4K8ac_peak_21619 | 7.67504  |                                                      |
| 3 | 129277457 | 1.29E+08 | KD2-H4K8ac_peak_21620 | 7.47462  |                                                      |
| 3 | 129279120 | 1.29E+08 | KD2-H4K8ac_peak_21621 | 9.61895  |                                                      |
| 3 | 129279864 | 1.29E+08 | KD2-H4K8ac_peak_21622 | 10.96455 |                                                      |
| 3 | 129280652 | 1.29E+08 | KD2-H4K8ac_peak_21623 | 11.09936 |                                                      |
| 3 | 129284237 | 1.29E+08 | KD2-H4K8ac_peak_21624 | 5.88845  |                                                      |
| 3 | 129285617 | 1.29E+08 | KD2-H4K8ac_peak_21625 | 8.44476  |                                                      |
| 3 | 129315243 | 1.29E+08 | KD2-H4K8ac_peak_21626 | 8.83582  |                                                      |
| 3 | 129316673 | 1.29E+08 | KD2-H4K8ac_peak_21627 | 4.211    |                                                      |
| 3 | 129325212 | 1.29E+08 | KD2-H4K8ac_peak_21628 | 6.11333  | PLXND1_ENSG00000004399                               |
| 3 | 129341114 | 1.29E+08 | KD2-H4K8ac_peak_21629 | 6.64891  |                                                      |
| 3 | 129409523 | 1.29E+08 | KD2-H4K8ac_peak_21630 | 5.73839  |                                                      |
| 3 | 129611815 | 1.3E+08  | KD2-H4K8ac_peak_21631 | 10.0692  | TMCC1_ENSG00000172765;TMCC1-AS1_ENSG00000271270      |
| 3 | 129612731 | 1.3E+08  | KD2-H4K8ac_peak_21632 | 5.57044  | TMCC1_ENSG00000172765;TMCC1-AS1_ENSG00000271270      |
| 3 | 129831114 | 1.3E+08  | KD2-H4K8ac_peak_21633 | 7.76329  | FAM86HP_ENSG00000253540;RP11-77P16.4_ENSG00000249846 |
| 3 | 130466514 | 1.3E+08  | KD2-H4K8ac_peak_21634 | 4.77079  | PIK3R4_ENSG00000196455                               |
| 3 | 130745298 | 1.31E+08 | KD2-H4K8ac_peak_21635 | 11.24702 | ASTE1_ENSG00000034533;NEK11_ENSG00000114670          |
| 3 | 131099945 | 1.31E+08 | KD2-H4K8ac_peak_21636 | 10.96455 | RP11-933H2.4_ENSG00000250608;NUDT16_ENSG00000198585  |
| 3 | 131100680 | 1.31E+08 | KD2-H4K8ac_peak_21637 | 7.76329  | RP11-933H2.4_ENSG00000250608;NUDT16_ENSG00000198585  |
| 3 | 131221468 | 1.31E+08 | KD2-H4K8ac_peak_21638 | 10.77651 | MRPL3_ENSG00000114686                                |
| 3 | 131222216 | 1.31E+08 | KD2-H4K8ac_peak_21639 | 6.66692  | MRPL3_ENSG00000114686                                |
| 3 | 132122514 | 1.32E+08 | KD2-H4K8ac_peak_21640 | 8.02571  |                                                      |
| 3 | 132124575 | 1.32E+08 | KD2-H4K8ac_peak_21641 | 10.25088 |                                                      |
| 3 | 132135573 | 1.32E+08 | KD2-H4K8ac_peak_21642 | 6.85193  | DNAJC13_ENSG00000138246                              |
| 3 | 132136407 | 1.32E+08 | KD2-H4K8ac_peak_21643 | 16.53429 | DNAJC13_ENSG00000138246                              |
| 3 | 132378400 | 1.32E+08 | KD2-H4K8ac_peak_21644 | 5.54647  | ACAD11_ENSG00000240303                               |
| 3 | 132379219 | 1.32E+08 | KD2-H4K8ac_peak_21645 | 9.61895  | ACAD11_ENSG00000240303                               |
| 3 | 132756703 | 1.33E+08 | KD2-H4K8ac_peak_21646 | 11.43353 | RP11-469L4.1_ENSG00000249725;TMEM108_ENSG00000144868 |
| 3 | 132757294 | 1.33E+08 | KD2-H4K8ac_peak_21647 | 6.65673  | TMEM108_ENSG00000144868                              |
| 3 | 132759846 | 1.33E+08 | KD2-H4K8ac_peak_21648 | 7.13615  |                                                      |
| 3 | 132842715 | 1.33E+08 | KD2-H4K8ac_peak_21649 | 10.88859 |                                                      |
| 3 | 132965335 | 1.33E+08 | KD2-H4K8ac_peak_21650 | 10.0692  |                                                      |
| 3 | 132983581 | 1.33E+08 | KD2-H4K8ac_peak_21651 | 4.77079  |                                                      |
| 3 | 132985277 | 1.33E+08 | KD2-H4K8ac_peak_21652 | 6.4095   |                                                      |
| 3 | 132986850 | 1.33E+08 | KD2-H4K8ac_peak_21653 | 14.69317 |                                                      |
| 3 | 132988668 | 1.33E+08 | KD2-H4K8ac_peak_21654 | 7.08474  |                                                      |
| 3 | 133005295 | 1.33E+08 | KD2-H4K8ac_peak_21655 | 5.58333  |                                                      |
| 3 | 133380409 | 1.33E+08 | KD2-H4K8ac_peak_21656 | 12.99417 | TOPBP1_ENSG00000163781;TFP1_ENSG00000242337          |
| 3 | 133380999 | 1.33E+08 | KD2-H4K8ac_peak_21657 | 7.75499  | TOPBP1_ENSG00000163781;TFP1_ENSG00000242337          |
| 3 | 133614295 | 1.34E+08 | KD2-H4K8ac_peak_21658 | 12.84642 | RAB6B_ENSG00000154917                                |
| 3 | 133646012 | 1.34E+08 | KD2-H4K8ac_peak_21659 | 12.88108 |                                                      |
| 3 | 133675059 | 1.34E+08 | KD2-H4K8ac_peak_21660 | 13.44374 |                                                      |
| 3 | 133969213 | 1.34E+08 | KD2-H4K8ac_peak_21661 | 4.211    | RYK_ENSG00000163785                                  |
| 3 | 133970853 | 1.34E+08 | KD2-H4K8ac_peak_21662 | 4.211    |                                                      |
| 3 | 134082361 | 1.34E+08 | KD2-H4K8ac_peak_21663 | 10.86378 |                                                      |
| 3 | 134093065 | 1.34E+08 | KD2-H4K8ac_peak_21664 | 7.36799  | AMOTL2_ENSG00000114019                               |

|   |           |          |                       |          |                                                     |
|---|-----------|----------|-----------------------|----------|-----------------------------------------------------|
| 3 | 134125145 | 1.34E+08 | KD2-H4K8ac_peak_21665 | 11.00372 |                                                     |
| 3 | 134125787 | 1.34E+08 | KD2-H4K8ac_peak_21666 | 6.31838  |                                                     |
| 3 | 134203883 | 1.34E+08 | KD2-H4K8ac_peak_21667 | 7.47462  | CEP63_ENSG00000182923                               |
| 3 | 134204589 | 1.34E+08 | KD2-H4K8ac_peak_21668 | 9.16531  | ANAPC13_ENSG00000129055;CEP63_ENSG00000182923       |
| 3 | 134205016 | 1.34E+08 | KD2-H4K8ac_peak_21669 | 9.63487  | ANAPC13_ENSG00000129055;CEP63_ENSG00000182923       |
| 3 | 134336618 | 1.34E+08 | KD2-H4K8ac_peak_21670 | 11.2938  |                                                     |
| 3 | 134337863 | 1.34E+08 | KD2-H4K8ac_peak_21671 | 7.9076   |                                                     |
| 3 | 134957072 | 1.35E+08 | KD2-H4K8ac_peak_21672 | 7.79558  |                                                     |
| 3 | 135914282 | 1.36E+08 | KD2-H4K8ac_peak_21673 | 17.16047 | MSL2_ENSG00000174579                                |
| 3 | 135915503 | 1.36E+08 | KD2-H4K8ac_peak_21674 | 13.65567 | MSL2_ENSG00000174579                                |
| 3 | 135968757 | 1.36E+08 | KD2-H4K8ac_peak_21675 | 13.09607 | PCCB_ENSG00000114054                                |
| 3 | 136470293 | 1.36E+08 | KD2-H4K8ac_peak_21676 | 16.57619 | STAG1_ENSG00000118007;RP11-102M11.2_ENSG00000261758 |
| 3 | 136471603 | 1.36E+08 | KD2-H4K8ac_peak_21677 | 17.8868  | STAG1_ENSG00000118007;RP11-102M11.2_ENSG00000261758 |
| 3 | 136538031 | 1.37E+08 | KD2-H4K8ac_peak_21678 | 6.13909  | SLC35G2_ENSG00000168917                             |
| 3 | 136538926 | 1.37E+08 | KD2-H4K8ac_peak_21679 | 6.25869  |                                                     |
| 3 | 137307164 | 1.37E+08 | KD2-H4K8ac_peak_21680 | 7.12754  |                                                     |
| 3 | 137308029 | 1.37E+08 | KD2-H4K8ac_peak_21681 | 4.42765  |                                                     |
| 3 | 137833976 | 1.38E+08 | KD2-H4K8ac_peak_21682 | 8.36432  | DZIP1L_ENSG00000158163                              |
| 3 | 137894091 | 1.38E+08 | KD2-H4K8ac_peak_21683 | 10.29344 | DBR1_ENSG00000138231                                |
| 3 | 137906354 | 1.38E+08 | KD2-H4K8ac_peak_21684 | 9.89383  | ARMC8_ENSG00000114098                               |
| 3 | 138048148 | 1.38E+08 | KD2-H4K8ac_peak_21685 | 9.16531  | NME9_ENSG00000181322                                |
| 3 | 138066993 | 1.38E+08 | KD2-H4K8ac_peak_21686 | 15.22643 | MRAS_ENSG00000158186                                |
| 3 | 138327329 | 1.38E+08 | KD2-H4K8ac_peak_21687 | 14.68449 | FAIM_ENSG00000158234                                |
| 3 | 138553426 | 1.39E+08 | KD2-H4K8ac_peak_21688 | 10.17486 | PIK3CB_ENSG00000051382                              |
| 3 | 138553927 | 1.39E+08 | KD2-H4K8ac_peak_21689 | 10.21366 | PIK3CB_ENSG00000051382                              |
| 3 | 139062110 | 1.39E+08 | KD2-H4K8ac_peak_21690 | 12.91654 |                                                     |
| 3 | 139108812 | 1.39E+08 | KD2-H4K8ac_peak_21691 | 5.34636  | COPB2_ENSG00000184432;RP11-319G6.1_ENSG00000248932  |
| 3 | 139109307 | 1.39E+08 | KD2-H4K8ac_peak_21692 | 7.01964  | COPB2_ENSG00000184432;RP11-319G6.1_ENSG00000248932  |
| 3 | 139253542 | 1.39E+08 | KD2-H4K8ac_peak_21693 | 9.89383  |                                                     |
| 3 | 139256528 | 1.39E+08 | KD2-H4K8ac_peak_21694 | 6.83165  | RBP1_ENSG00000114115                                |
| 3 | 139258066 | 1.39E+08 | KD2-H4K8ac_peak_21695 | 6.38689  | RBP1_ENSG00000114115                                |
| 3 | 139258763 | 1.39E+08 | KD2-H4K8ac_peak_21696 | 13.80019 | RBP1_ENSG00000114115                                |
| 3 | 139260014 | 1.39E+08 | KD2-H4K8ac_peak_21697 | 5.1707   |                                                     |
| 3 | 139654426 | 1.4E+08  | KD2-H4K8ac_peak_21698 | 3.75035  | CLSTN2_ENSG00000158258                              |
| 3 | 140660156 | 1.41E+08 | KD2-H4K8ac_peak_21699 | 7.45501  | SLC25A36_ENSG00000114120                            |
| 3 | 140660732 | 1.41E+08 | KD2-H4K8ac_peak_21700 | 14.98936 | SLC25A36_ENSG00000114120                            |
| 3 | 140661199 | 1.41E+08 | KD2-H4K8ac_peak_21701 | 6.40683  | SLC25A36_ENSG00000114120                            |
| 3 | 140769769 | 1.41E+08 | KD2-H4K8ac_peak_21702 | 7.51054  | SPSB4_ENSG00000175093                               |
| 3 | 140771615 | 1.41E+08 | KD2-H4K8ac_peak_21703 | 5.18553  |                                                     |
| 3 | 140802122 | 1.41E+08 | KD2-H4K8ac_peak_21704 | 8.74596  |                                                     |
| 3 | 140949865 | 1.41E+08 | KD2-H4K8ac_peak_21705 | 21.26856 |                                                     |
| 3 | 141029928 | 1.41E+08 | KD2-H4K8ac_peak_21706 | 6.66692  |                                                     |
| 3 | 141112292 | 1.41E+08 | KD2-H4K8ac_peak_21707 | 9.68448  |                                                     |
| 3 | 141120835 | 1.41E+08 | KD2-H4K8ac_peak_21708 | 12.99417 |                                                     |
| 3 | 141205300 | 1.41E+08 | KD2-H4K8ac_peak_21709 | 7.59643  | RASA2_ENSG00000155903                               |
| 3 | 141206005 | 1.41E+08 | KD2-H4K8ac_peak_21710 | 9.36516  | RASA2_ENSG00000155903                               |

|   |           |          |                       |          |                                                                           |
|---|-----------|----------|-----------------------|----------|---------------------------------------------------------------------------|
| 3 | 141378524 | 1.41E+08 | KD2-H4K8ac_peak_21711 | 8.23274  |                                                                           |
| 3 | 141457207 | 1.41E+08 | KD2-H4K8ac_peak_21712 | 5.9696   | RNF7_ENSG00000114125                                                      |
| 3 | 141594729 | 1.42E+08 | KD2-H4K8ac_peak_21713 | 6.66692  | ATP1B3_ENSG00000069849                                                    |
| 3 | 141595956 | 1.42E+08 | KD2-H4K8ac_peak_21714 | 5.51783  | ATP1B3_ENSG00000069849                                                    |
| 3 | 141868612 | 1.42E+08 | KD2-H4K8ac_peak_21715 | 11.05467 | TFDP2_ENSG00000114126                                                     |
| 3 | 141943802 | 1.42E+08 | KD2-H4K8ac_peak_21716 | 11.92978 | GK5_ENSG00000175066                                                       |
| 3 | 142166482 | 1.42E+08 | KD2-H4K8ac_peak_21717 | 5.9696   | XRN1_ENSG00000114127                                                      |
| 3 | 142166940 | 1.42E+08 | KD2-H4K8ac_peak_21718 | 8.37231  | XRN1_ENSG00000114127                                                      |
| 3 | 142297147 | 1.42E+08 | KD2-H4K8ac_peak_21719 | 12.99417 | ATR_ENSG00000175054                                                       |
| 3 | 142442962 | 1.42E+08 | KD2-H4K8ac_peak_21720 | 12.82393 | TRPC1_ENSG00000144935                                                     |
| 3 | 142607415 | 1.43E+08 | KD2-H4K8ac_peak_21721 | 7.18615  | PCOLCE2_ENSG00000163710                                                   |
| 3 | 142607979 | 1.43E+08 | KD2-H4K8ac_peak_21722 | 6.05809  | PCOLCE2_ENSG00000163710                                                   |
| 3 | 142682036 | 1.43E+08 | KD2-H4K8ac_peak_21723 | 5.30799  | PAQR9_ENSG00000188582;RP11-372E1.6_ENSG00000241570;U2SURP_ENSG00000163714 |
| 3 | 142720480 | 1.43E+08 | KD2-H4K8ac_peak_21724 | 14.15075 | RP11-91G21.1_ENSG00000268129                                              |
| 3 | 145051096 | 1.45E+08 | KD2-H4K8ac_peak_21725 | 5.30799  |                                                                           |
| 3 | 147110236 | 1.47E+08 | KD2-H4K8ac_peak_21726 | 7.95563  | ZIC1_ENSG00000152977                                                      |
| 3 | 147111108 | 1.47E+08 | KD2-H4K8ac_peak_21727 | 7.51054  | ZIC1_ENSG00000152977                                                      |
| 3 | 147138991 | 1.47E+08 | KD2-H4K8ac_peak_21728 | 9.41046  |                                                                           |
| 3 | 148709537 | 1.49E+08 | KD2-H4K8ac_peak_21729 | 11.08187 | GYG1_ENSG00000163754                                                      |
| 3 | 148804536 | 1.49E+08 | KD2-H4K8ac_peak_21730 | 8.02571  | HLTF_ENSG00000071794;HLTF-AS1_ENSG00000239718                             |
| 3 | 149265136 | 1.49E+08 | KD2-H4K8ac_peak_21731 | 5.57044  |                                                                           |
| 3 | 149266086 | 1.49E+08 | KD2-H4K8ac_peak_21732 | 4.42765  |                                                                           |
| 3 | 149272535 | 1.49E+08 | KD2-H4K8ac_peak_21733 | 7.13615  |                                                                           |
| 3 | 149375209 | 1.49E+08 | KD2-H4K8ac_peak_21734 | 5.77029  | WWTR1-AS1_ENSG00000241313                                                 |
| 3 | 149375900 | 1.49E+08 | KD2-H4K8ac_peak_21735 | 8.94469  |                                                                           |
| 3 | 149470011 | 1.49E+08 | KD2-H4K8ac_peak_21736 | 9.65086  | COMMD2_ENSG00000114744                                                    |
| 3 | 149530424 | 1.5E+08  | KD2-H4K8ac_peak_21737 | 16.33377 | RNF13_ENSG00000082996                                                     |
| 3 | 149687440 | 1.5E+08  | KD2-H4K8ac_peak_21738 | 5.16439  |                                                                           |
| 3 | 149688009 | 1.5E+08  | KD2-H4K8ac_peak_21739 | 23.68363 | AC117395.1_ENSG00000268175                                                |
| 3 | 150126215 | 1.5E+08  | KD2-H4K8ac_peak_21740 | 10.19949 | TSC22D2_ENSG00000196428                                                   |
| 3 | 150263787 | 1.5E+08  | KD2-H4K8ac_peak_21741 | 12.66412 | EIF2A_ENSG00000144895                                                     |
| 3 | 150320801 | 1.5E+08  | KD2-H4K8ac_peak_21742 | 8.52559  | SERP1_ENSG00000120742;SELT_ENSG00000198843                                |
| 3 | 150421383 | 1.5E+08  | KD2-H4K8ac_peak_21743 | 4.42765  | FAM194A_ENSG00000163645;RP11-103G8.2_ENSG00000240137                      |
| 3 | 150479732 | 1.5E+08  | KD2-H4K8ac_peak_21744 | 6.94954  | SIAH2-AS1_ENSG00000244265                                                 |
| 3 | 150481392 | 1.5E+08  | KD2-H4K8ac_peak_21745 | 13.36684 | SIAH2_ENSG00000181788                                                     |
| 3 | 150803578 | 1.51E+08 | KD2-H4K8ac_peak_21746 | 7.44324  | MED12L_ENSG00000144893                                                    |
| 3 | 150934239 | 1.51E+08 | KD2-H4K8ac_peak_21747 | 6.16888  |                                                                           |
| 3 | 151870458 | 1.52E+08 | KD2-H4K8ac_peak_21748 | 8.5781   | RP11-246A10.1_ENSG00000239941                                             |
| 3 | 151986318 | 1.52E+08 | KD2-H4K8ac_peak_21749 | 11.05407 | MBNL1-AS1_ENSG00000229619                                                 |
| 3 | 152880105 | 1.53E+08 | KD2-H4K8ac_peak_21750 | 6.97919  | RP11-529G21.2_ENSG00000244268;RAP2B_ENSG00000181467                       |
| 3 | 152880981 | 1.53E+08 | KD2-H4K8ac_peak_21751 | 4.67342  | RAP2B_ENSG00000181467                                                     |
| 3 | 154041889 | 1.54E+08 | KD2-H4K8ac_peak_21752 | 15.7388  | DHX36_ENSG00000174953                                                     |
| 3 | 154797500 | 1.55E+08 | KD2-H4K8ac_peak_21753 | 10.21502 |                                                                           |
| 3 | 155462098 | 1.55E+08 | KD2-H4K8ac_peak_21754 | 10.46264 | PLCH1_ENSG00000114805;AC104472.1_ENSG00000214919                          |
| 3 | 155523625 | 1.56E+08 | KD2-H4K8ac_peak_21755 | 8.55271  | C3orf33_ENSG00000174928                                                   |
| 3 | 155588586 | 1.56E+08 | KD2-H4K8ac_peak_21756 | 11.05467 | GMPS_ENSG00000163655                                                      |

|   |           |          |                       |          |                                                                                |
|---|-----------|----------|-----------------------|----------|--------------------------------------------------------------------------------|
| 3 | 156101141 | 1.56E+08 | KD2-H4K8ac_peak_21757 | 5.43522  |                                                                                |
| 3 | 156272599 | 1.56E+08 | KD2-H4K8ac_peak_21758 | 6.65673  | SSR3_ENSG00000114850                                                           |
| 3 | 156273200 | 1.56E+08 | KD2-H4K8ac_peak_21759 | 8.1718   | SSR3_ENSG00000114850                                                           |
| 3 | 156533812 | 1.57E+08 | KD2-H4K8ac_peak_21760 | 7.49599  | LINC00886_ENSG00000240875                                                      |
| 3 | 156543758 | 1.57E+08 | KD2-H4K8ac_peak_21761 | 9.34195  | LEKR1_ENSG00000197980                                                          |
| 3 | 156806494 | 1.57E+08 | KD2-H4K8ac_peak_21762 | 4.54006  | LINC00881_ENSG00000241135                                                      |
| 3 | 156877328 | 1.57E+08 | KD2-H4K8ac_peak_21763 | 14.56955 | CCNL1_ENSG00000163660                                                          |
| 3 | 156878307 | 1.57E+08 | KD2-H4K8ac_peak_21764 | 6.13177  | CCNL1_ENSG00000163660                                                          |
| 3 | 156892080 | 1.57E+08 | KD2-H4K8ac_peak_21765 | 6.40297  | RNA5SP146_ENSG00000222675;RP11-550I24.2_ENSG00000243176                        |
| 3 | 156893533 | 1.57E+08 | KD2-H4K8ac_peak_21766 | 4.44923  | RP11-550I24.2_ENSG00000243176                                                  |
| 3 | 157074116 | 1.57E+08 | KD2-H4K8ac_peak_21767 | 4.37708  |                                                                                |
| 3 | 157155370 | 1.57E+08 | KD2-H4K8ac_peak_21768 | 18.5703  | PTX3_ENSG00000163661                                                           |
| 3 | 157155947 | 1.57E+08 | KD2-H4K8ac_peak_21769 | 6.66692  |                                                                                |
| 3 | 157251048 | 1.57E+08 | KD2-H4K8ac_peak_21770 | 5.57044  | VEPH1_ENSG00000197415                                                          |
| 3 | 157260562 | 1.57E+08 | KD2-H4K8ac_peak_21771 | 6.20982  | C3orf55_ENSG00000174899                                                        |
| 3 | 157336956 | 1.57E+08 | KD2-H4K8ac_peak_21772 | 6.31143  |                                                                                |
| 3 | 157588586 | 1.58E+08 | KD2-H4K8ac_peak_21773 | 6.16888  |                                                                                |
| 3 | 157590425 | 1.58E+08 | KD2-H4K8ac_peak_21774 | 12.42547 |                                                                                |
| 3 | 157723338 | 1.58E+08 | KD2-H4K8ac_peak_21775 | 7.12754  |                                                                                |
| 3 | 157822964 | 1.58E+08 | KD2-H4K8ac_peak_21776 | 5.9696   | SHOX2_ENSG00000168779;RSCR1_ENSG00000174891                                    |
| 3 | 157824911 | 1.58E+08 | KD2-H4K8ac_peak_21777 | 5.71749  | SHOX2_ENSG00000168779                                                          |
| 3 | 157827867 | 1.58E+08 | KD2-H4K8ac_peak_21778 | 11.89502 |                                                                                |
| 3 | 158086077 | 1.58E+08 | KD2-H4K8ac_peak_21779 | 6.40683  |                                                                                |
| 3 | 158201780 | 1.58E+08 | KD2-H4K8ac_peak_21780 | 6.16888  |                                                                                |
| 3 | 158205293 | 1.58E+08 | KD2-H4K8ac_peak_21781 | 6.25869  |                                                                                |
| 3 | 158449472 | 1.58E+08 | KD2-H4K8ac_peak_21782 | 8.85813  | RARRES1_ENSG00000118849;MFSD1_ENSG00000118855;RP11-379F4.4_ENSG00000240207     |
| 3 | 158518992 | 1.59E+08 | KD2-H4K8ac_peak_21783 | 7.07117  | RP11-379F4.9_ENSG00000272247                                                   |
| 3 | 159476362 | 1.59E+08 | KD2-H4K8ac_peak_21784 | 4.75764  |                                                                                |
| 3 | 159481014 | 1.59E+08 | KD2-H4K8ac_peak_21785 | 6.99815  |                                                                                |
| 3 | 159481884 | 1.59E+08 | KD2-H4K8ac_peak_21786 | 9.63487  |                                                                                |
| 3 | 159557806 | 1.6E+08  | KD2-H4K8ac_peak_21787 | 5.01002  | SCHIP1_ENSG00000151967                                                         |
| 3 | 159569491 | 1.6E+08  | KD2-H4K8ac_peak_21788 | 4.9025   |                                                                                |
| 3 | 159570734 | 1.6E+08  | KD2-H4K8ac_peak_21789 | 11.75669 |                                                                                |
| 3 | 159574035 | 1.6E+08  | KD2-H4K8ac_peak_21790 | 9.36516  |                                                                                |
| 3 | 159574900 | 1.6E+08  | KD2-H4K8ac_peak_21791 | 5.05318  |                                                                                |
| 3 | 159578410 | 1.6E+08  | KD2-H4K8ac_peak_21792 | 5.14125  |                                                                                |
| 3 | 159597502 | 1.6E+08  | KD2-H4K8ac_peak_21793 | 3.75035  |                                                                                |
| 3 | 159706555 | 1.6E+08  | KD2-H4K8ac_peak_21794 | 6.67538  | IL12A_ENSG00000168811                                                          |
| 3 | 159935578 | 1.6E+08  | KD2-H4K8ac_peak_21795 | 7.12754  |                                                                                |
| 3 | 159943987 | 1.6E+08  | KD2-H4K8ac_peak_21796 | 5.14125  | IL12A-AS1_ENSG00000244040;C3orf80_ENSG00000180044;RP11-431I8.1_ENSG00000244078 |
| 3 | 160117780 | 1.6E+08  | KD2-H4K8ac_peak_21797 | 9.65086  | IFT80_ENSG00000068885;SMC4_ENSG00000113810                                     |
| 3 | 160283605 | 1.6E+08  | KD2-H4K8ac_peak_21798 | 12.84642 | KPNA4_ENSG00000186432;KRT8P12_ENSG00000229320                                  |
| 3 | 160472589 | 1.6E+08  | KD2-H4K8ac_peak_21799 | 3.75035  | RP11-16N11.2_ENSG00000260572;PPM1L_ENSG00000163590                             |
| 3 | 160603398 | 1.61E+08 | KD2-H4K8ac_peak_21800 | 8.1233   |                                                                                |
| 3 | 160939157 | 1.61E+08 | KD2-H4K8ac_peak_21801 | 7.47462  |                                                                                |
| 3 | 161089776 | 1.61E+08 | KD2-H4K8ac_peak_21802 | 6.04107  | SPTSSB_ENSG00000196542                                                         |

|   |           |          |                       |          |                                                     |
|---|-----------|----------|-----------------------|----------|-----------------------------------------------------|
| 3 | 161090318 | 1.61E+08 | KD2-H4K8ac_peak_21803 | 4.91674  | SPTSSB_ENSG00000196542                              |
| 3 | 167452228 | 1.67E+08 | KD2-H4K8ac_peak_21804 | 10.05606 | PDCD10_ENSG00000114209;SERPINI1_ENSG00000163536     |
| 3 | 167453077 | 1.67E+08 | KD2-H4K8ac_peak_21805 | 5.75757  | PDCD10_ENSG00000114209;SERPINI1_ENSG00000163536     |
| 3 | 167812865 | 1.68E+08 | KD2-H4K8ac_peak_21806 | 7.76329  | GOLIM4_ENSG00000173905                              |
| 3 | 167967519 | 1.68E+08 | KD2-H4K8ac_peak_21807 | 7.07117  | EGFEM1P_ENSG00000206120                             |
| 3 | 169380028 | 1.69E+08 | KD2-H4K8ac_peak_21808 | 7.76329  |                                                     |
| 3 | 169482039 | 1.69E+08 | KD2-H4K8ac_peak_21809 | 10.96455 | TERC_ENSG00000270141                                |
| 3 | 169487142 | 1.69E+08 | KD2-H4K8ac_peak_21810 | 13.39763 | ACTRT3_ENSG00000184378;RP11-816J6.3_ENSG00000269889 |
| 3 | 169490662 | 1.69E+08 | KD2-H4K8ac_peak_21811 | 11.05467 | MYNN_ENSG00000085274                                |
| 3 | 169491262 | 1.69E+08 | KD2-H4K8ac_peak_21812 | 7.07117  | MYNN_ENSG00000085274                                |
| 3 | 169529977 | 1.7E+08  | KD2-H4K8ac_peak_21813 | 17.27897 | LRRRC34_ENSG00000171757                             |
| 3 | 169684805 | 1.7E+08  | KD2-H4K8ac_peak_21814 | 9.36516  | RP11-379K17.4_ENSG00000239219;SEC62_ENSG00000008952 |
| 3 | 169755708 | 1.7E+08  | KD2-H4K8ac_peak_21815 | 9.11031  | GPR160_ENSG00000173890                              |
| 3 | 169898973 | 1.7E+08  | KD2-H4K8ac_peak_21816 | 10.21366 | PHC3_ENSG00000173889                                |
| 3 | 169939373 | 1.7E+08  | KD2-H4K8ac_peak_21817 | 7.59643  | PRKCI_ENSG00000163558                               |
| 3 | 169939977 | 1.7E+08  | KD2-H4K8ac_peak_21818 | 10.72656 | PRKCI_ENSG00000163558                               |
| 3 | 170074022 | 1.7E+08  | KD2-H4K8ac_peak_21819 | 10.29736 | SKIL_ENSG00000136603                                |
| 3 | 170075516 | 1.7E+08  | KD2-H4K8ac_peak_21820 | 9.63487  | SKIL_ENSG00000136603                                |
| 3 | 170143460 | 1.7E+08  | KD2-H4K8ac_peak_21821 | 5.57044  |                                                     |
| 3 | 170166512 | 1.7E+08  | KD2-H4K8ac_peak_21822 | 5.25071  |                                                     |
| 3 | 170304041 | 1.7E+08  | KD2-H4K8ac_peak_21823 | 8.74596  | SLC7A14_ENSG00000013293                             |
| 3 | 170368937 | 1.7E+08  | KD2-H4K8ac_peak_21824 | 5.45396  |                                                     |
| 3 | 170588209 | 1.71E+08 | KD2-H4K8ac_peak_21825 | 4.8888   | RPL22L1_ENSG00000163584                             |
| 3 | 171178738 | 1.71E+08 | KD2-H4K8ac_peak_21826 | 8.97719  | TNIK_ENSG00000154310                                |
| 3 | 171528426 | 1.72E+08 | KD2-H4K8ac_peak_21827 | 4.42765  | PLD1_ENSG00000075651;PP13439_ENSG00000183657        |
| 3 | 171757536 | 1.72E+08 | KD2-H4K8ac_peak_21828 | 4.54006  | FNDC3B_ENSG00000075420                              |
| 3 | 171758482 | 1.72E+08 | KD2-H4K8ac_peak_21829 | 12.00273 |                                                     |
| 3 | 172428586 | 1.72E+08 | KD2-H4K8ac_peak_21830 | 5.88845  | NCEH1_ENSG00000144959                               |
| 3 | 172468578 | 1.72E+08 | KD2-H4K8ac_peak_21831 | 7.76329  | ECT2_ENSG00000114346                                |
| 3 | 173115525 | 1.73E+08 | KD2-H4K8ac_peak_21832 | 11.92978 |                                                     |
| 3 | 173302843 | 1.73E+08 | KD2-H4K8ac_peak_21833 | 5.14125  |                                                     |
| 3 | 176914213 | 1.77E+08 | KD2-H4K8ac_peak_21834 | 5.14125  | TBL1XR1_ENSG00000177565                             |
| 3 | 176914886 | 1.77E+08 | KD2-H4K8ac_peak_21835 | 9.41046  | TBL1XR1_ENSG00000177565                             |
| 3 | 176915551 | 1.77E+08 | KD2-H4K8ac_peak_21836 | 20.42458 | TBL1XR1_ENSG00000177565                             |
| 3 | 177074823 | 1.77E+08 | KD2-H4K8ac_peak_21837 | 7.70289  |                                                     |
| 3 | 177076664 | 1.77E+08 | KD2-H4K8ac_peak_21838 | 24.85162 |                                                     |
| 3 | 177079568 | 1.77E+08 | KD2-H4K8ac_peak_21839 | 9.97423  |                                                     |
| 3 | 177234145 | 1.77E+08 | KD2-H4K8ac_peak_21840 | 5.14125  |                                                     |
| 3 | 177244054 | 1.77E+08 | KD2-H4K8ac_peak_21841 | 10.17698 |                                                     |
| 3 | 177261909 | 1.77E+08 | KD2-H4K8ac_peak_21842 | 5.14125  |                                                     |
| 3 | 177264221 | 1.77E+08 | KD2-H4K8ac_peak_21843 | 10.0692  |                                                     |
| 3 | 177265307 | 1.77E+08 | KD2-H4K8ac_peak_21844 | 6.40683  |                                                     |
| 3 | 177278701 | 1.77E+08 | KD2-H4K8ac_peak_21845 | 8.1233   |                                                     |
| 3 | 177281467 | 1.77E+08 | KD2-H4K8ac_peak_21846 | 4.86824  |                                                     |
| 3 | 177308863 | 1.77E+08 | KD2-H4K8ac_peak_21847 | 6.66692  |                                                     |
| 3 | 177314388 | 1.77E+08 | KD2-H4K8ac_peak_21848 | 7.71478  |                                                     |

|   |           |          |                       |          |                                                      |
|---|-----------|----------|-----------------------|----------|------------------------------------------------------|
| 3 | 177315075 | 1.77E+08 | KD2-H4K8ac_peak_21849 | 8.1718   |                                                      |
| 3 | 177430534 | 1.77E+08 | KD2-H4K8ac_peak_21850 | 5.45396  |                                                      |
| 3 | 177469780 | 1.77E+08 | KD2-H4K8ac_peak_21851 | 7.01964  |                                                      |
| 3 | 177472275 | 1.77E+08 | KD2-H4K8ac_peak_21852 | 6.40297  |                                                      |
| 3 | 177541535 | 1.78E+08 | KD2-H4K8ac_peak_21853 | 7.13615  |                                                      |
| 3 | 177543273 | 1.78E+08 | KD2-H4K8ac_peak_21854 | 7.70289  |                                                      |
| 3 | 177593872 | 1.78E+08 | KD2-H4K8ac_peak_21855 | 4.42765  |                                                      |
| 3 | 177652025 | 1.78E+08 | KD2-H4K8ac_peak_21856 | 6.16888  | RP11-2L8.1_ENSG00000225790                           |
| 3 | 177796655 | 1.78E+08 | KD2-H4K8ac_peak_21857 | 6.31143  |                                                      |
| 3 | 177801233 | 1.78E+08 | KD2-H4K8ac_peak_21858 | 8.45238  |                                                      |
| 3 | 177802422 | 1.78E+08 | KD2-H4K8ac_peak_21859 | 5.64449  |                                                      |
| 3 | 177803160 | 1.78E+08 | KD2-H4K8ac_peak_21860 | 8.17902  |                                                      |
| 3 | 177899571 | 1.78E+08 | KD2-H4K8ac_peak_21861 | 11.75669 |                                                      |
| 3 | 178006798 | 1.78E+08 | KD2-H4K8ac_peak_21862 | 9.11818  |                                                      |
| 3 | 178008813 | 1.78E+08 | KD2-H4K8ac_peak_21863 | 4.01115  |                                                      |
| 3 | 178011466 | 1.78E+08 | KD2-H4K8ac_peak_21864 | 8.94469  |                                                      |
| 3 | 178038510 | 1.78E+08 | KD2-H4K8ac_peak_21865 | 6.16888  |                                                      |
| 3 | 178789097 | 1.79E+08 | KD2-H4K8ac_peak_21866 | 8.55271  | ZMAT3_ENSG00000172667                                |
| 3 | 178850197 | 1.79E+08 | KD2-H4K8ac_peak_21867 | 6.16888  |                                                      |
| 3 | 178866172 | 1.79E+08 | KD2-H4K8ac_peak_21868 | 11.89502 | RP11-360P21.2_ENSG00000229102;PIK3CA_ENSG00000121879 |
| 3 | 178978901 | 1.79E+08 | KD2-H4K8ac_peak_21869 | 12.13241 | LRRFIP1P1_ENSG00000240429                            |
| 3 | 179040293 | 1.79E+08 | KD2-H4K8ac_peak_21870 | 8.12964  | ZNF639_ENSG00000121864                               |
| 3 | 179040809 | 1.79E+08 | KD2-H4K8ac_peak_21871 | 10.4923  | ZNF639_ENSG00000121864                               |
| 3 | 179064696 | 1.79E+08 | KD2-H4K8ac_peak_21872 | 6.60096  | MFN1_ENSG00000171109                                 |
| 3 | 179065538 | 1.79E+08 | KD2-H4K8ac_peak_21873 | 10.02417 | MFN1_ENSG00000171109                                 |
| 3 | 179168681 | 1.79E+08 | KD2-H4K8ac_peak_21874 | 16.09057 | GNB4_ENSG00000114450                                 |
| 3 | 179169549 | 1.79E+08 | KD2-H4K8ac_peak_21875 | 5.14125  | GNB4_ENSG00000114450;RP11-145M9.2_ENSG00000239255    |
| 3 | 179322643 | 1.79E+08 | KD2-H4K8ac_peak_21876 | 12.84642 | MRPL47_ENSG00000136522;NDUFB5_ENSG00000136521        |
| 3 | 179370469 | 1.79E+08 | KD2-H4K8ac_peak_21877 | 9.1707   | USP13_ENSG00000058056                                |
| 3 | 179371014 | 1.79E+08 | KD2-H4K8ac_peak_21878 | 5.1707   | USP13_ENSG00000058056                                |
| 3 | 179660001 | 1.8E+08  | KD2-H4K8ac_peak_21879 | 10.96455 |                                                      |
| 3 | 180320048 | 1.8E+08  | KD2-H4K8ac_peak_21880 | 10.53377 | RP11-496B10.3_ENSG00000239774;TTC14_ENSG00000163728  |
| 3 | 180397363 | 1.8E+08  | KD2-H4K8ac_peak_21881 | 15.9336  | CCDC39-AS1_ENSG00000243187                           |
| 3 | 180588010 | 1.81E+08 | KD2-H4K8ac_peak_21882 | 9.15329  | CCDC39_ENSG00000145075                               |
| 3 | 180630074 | 1.81E+08 | KD2-H4K8ac_peak_21883 | 16.86926 |                                                      |
| 3 | 180707181 | 1.81E+08 | KD2-H4K8ac_peak_21884 | 9.36516  | DNAJC19_ENSG00000205981;SOX2-OT_ENSG00000242808      |
| 3 | 181429049 | 1.81E+08 | KD2-H4K8ac_peak_21885 | 6.14257  | SOX2_ENSG00000181449                                 |
| 3 | 181598661 | 1.82E+08 | KD2-H4K8ac_peak_21886 | 6.25869  |                                                      |
| 3 | 182082327 | 1.82E+08 | KD2-H4K8ac_peak_21887 | 4.76709  | RP11-338L18.1_ENSG00000242012                        |
| 3 | 182400528 | 1.82E+08 | KD2-H4K8ac_peak_21888 | 4.42765  |                                                      |
| 3 | 182443587 | 1.82E+08 | KD2-H4K8ac_peak_21889 | 14.16941 |                                                      |
| 3 | 182444337 | 1.82E+08 | KD2-H4K8ac_peak_21890 | 6.9809   |                                                      |
| 3 | 182510807 | 1.83E+08 | KD2-H4K8ac_peak_21891 | 13.57066 | RP11-225N10.1_ENSG00000240063;ATP11B_ENSG00000058063 |
| 3 | 182511383 | 1.83E+08 | KD2-H4K8ac_peak_21892 | 12.06346 | RP11-225N10.1_ENSG00000240063;ATP11B_ENSG00000058063 |
| 3 | 182638411 | 1.83E+08 | KD2-H4K8ac_peak_21893 | 9.15329  |                                                      |
| 3 | 182697623 | 1.83E+08 | KD2-H4K8ac_peak_21894 | 9.57101  |                                                      |



|   |           |          |                       |          |                                                        |
|---|-----------|----------|-----------------------|----------|--------------------------------------------------------|
| 3 | 182880403 | 1.83E+08 | KD2-H4K8ac_peak_21895 | 5.54647  | LAMP3_ENSG00000078081                                  |
| 3 | 182971802 | 1.83E+08 | KD2-H4K8ac_peak_21896 | 18.54875 | B3GNT5_ENSG000000176597                                |
| 3 | 183104612 | 1.83E+08 | KD2-H4K8ac_peak_21897 | 6.54442  |                                                        |
| 3 | 183165475 | 1.83E+08 | KD2-H4K8ac_peak_21898 | 6.05809  | LINC00888_ENSG000000240024                             |
| 3 | 183195664 | 1.83E+08 | KD2-H4K8ac_peak_21899 | 7.40111  |                                                        |
| 3 | 183196467 | 1.83E+08 | KD2-H4K8ac_peak_21900 | 6.0073   |                                                        |
| 3 | 183353975 | 1.83E+08 | KD2-H4K8ac_peak_21901 | 4.86324  | KLHL24_ENSG000000114796                                |
| 3 | 183415037 | 1.83E+08 | KD2-H4K8ac_peak_21902 | 6.83936  | YEATS2_ENSG000000163872                                |
| 3 | 183415627 | 1.83E+08 | KD2-H4K8ac_peak_21903 | 14.68449 | YEATS2_ENSG000000163872                                |
| 3 | 183602277 | 1.84E+08 | KD2-H4K8ac_peak_21904 | 11.89502 | PARL_ENSG000000175193;RP11-315J22.5_ENSG000000234371   |
| 3 | 183602878 | 1.84E+08 | KD2-H4K8ac_peak_21905 | 8.59579  | PARL_ENSG000000175193;RP11-315J22.5_ENSG000000234371   |
| 3 | 183735384 | 1.84E+08 | KD2-H4K8ac_peak_21906 | 13.56049 | ABCC5_ENSG000000114770                                 |
| 3 | 183735868 | 1.84E+08 | KD2-H4K8ac_peak_21907 | 16.73922 | ABCC5_ENSG000000114770                                 |
| 3 | 183852796 | 1.84E+08 | KD2-H4K8ac_peak_21908 | 8.58069  | RP11-778D9.12_ENSG000000272721;EIF2B5_ENSG000000145191 |
| 3 | 183872463 | 1.84E+08 | KD2-H4K8ac_peak_21909 | 10.0692  | DVL3_ENSG000000161202                                  |
| 3 | 183873823 | 1.84E+08 | KD2-H4K8ac_peak_21910 | 5.15777  | DVL3_ENSG000000161202                                  |
| 3 | 183874290 | 1.84E+08 | KD2-H4K8ac_peak_21911 | 5.88845  |                                                        |
| 3 | 183892698 | 1.84E+08 | KD2-H4K8ac_peak_21912 | 11.92978 | AP2M1_ENSG000000161203                                 |
| 3 | 183903222 | 1.84E+08 | KD2-H4K8ac_peak_21913 | 7.40314  | ABCF3_ENSG000000161204                                 |
| 3 | 183928408 | 1.84E+08 | KD2-H4K8ac_peak_21914 | 5.25071  |                                                        |
| 3 | 183929951 | 1.84E+08 | KD2-H4K8ac_peak_21915 | 9.15329  |                                                        |
| 3 | 183966070 | 1.84E+08 | KD2-H4K8ac_peak_21916 | 8.83582  | ALG3_ENSG000000214160                                  |
| 3 | 183967599 | 1.84E+08 | KD2-H4K8ac_peak_21917 | 6.44277  | ALG3_ENSG000000214160;ECE2_ENSG000000145194            |
| 3 | 184016010 | 1.84E+08 | KD2-H4K8ac_peak_21918 | 10.96455 | PSMD2_ENSG000000175166                                 |
| 3 | 184032523 | 1.84E+08 | KD2-H4K8ac_peak_21919 | 11.43863 | EIF4G1_ENSG000000114867                                |
| 3 | 184054128 | 1.84E+08 | KD2-H4K8ac_peak_21920 | 10.87093 | FAM131A_ENSG000000175182                               |
| 3 | 184079075 | 1.84E+08 | KD2-H4K8ac_peak_21921 | 6.25869  | CLCN2_ENSG000000114859;POLR2H_ENSG000000163882         |
| 3 | 184079586 | 1.84E+08 | KD2-H4K8ac_peak_21922 | 10.43145 | CLCN2_ENSG000000114859;POLR2H_ENSG000000163882         |
| 3 | 184080277 | 1.84E+08 | KD2-H4K8ac_peak_21923 | 23.78494 | CLCN2_ENSG000000114859;POLR2H_ENSG000000163882         |
| 3 | 184163010 | 1.84E+08 | KD2-H4K8ac_peak_21924 | 4.01115  |                                                        |
| 3 | 184243117 | 1.84E+08 | KD2-H4K8ac_peak_21925 | 12.74171 |                                                        |
| 3 | 184279637 | 1.84E+08 | KD2-H4K8ac_peak_21926 | 7.20116  | EPHB3_ENSG000000182580                                 |
| 3 | 184286156 | 1.84E+08 | KD2-H4K8ac_peak_21927 | 14.69247 |                                                        |
| 3 | 184286967 | 1.84E+08 | KD2-H4K8ac_peak_21928 | 8.10216  |                                                        |
| 3 | 184291996 | 1.84E+08 | KD2-H4K8ac_peak_21929 | 7.84589  |                                                        |
| 3 | 184292624 | 1.84E+08 | KD2-H4K8ac_peak_21930 | 17.86695 |                                                        |
| 3 | 184309974 | 1.84E+08 | KD2-H4K8ac_peak_21931 | 11.79585 |                                                        |
| 3 | 184310957 | 1.84E+08 | KD2-H4K8ac_peak_21932 | 14.16977 |                                                        |
| 3 | 184315417 | 1.84E+08 | KD2-H4K8ac_peak_21933 | 18.19257 |                                                        |
| 3 | 184316636 | 1.84E+08 | KD2-H4K8ac_peak_21934 | 5.9696   |                                                        |
| 3 | 184320714 | 1.84E+08 | KD2-H4K8ac_peak_21935 | 6.40683  |                                                        |
| 3 | 184352853 | 1.84E+08 | KD2-H4K8ac_peak_21936 | 9.15069  |                                                        |
| 3 | 184353589 | 1.84E+08 | KD2-H4K8ac_peak_21937 | 18.94636 |                                                        |
| 3 | 184360790 | 1.84E+08 | KD2-H4K8ac_peak_21938 | 6.25869  |                                                        |
| 3 | 184376414 | 1.84E+08 | KD2-H4K8ac_peak_21939 | 9.36516  |                                                        |
| 3 | 184377758 | 1.84E+08 | KD2-H4K8ac_peak_21940 | 6.20982  |                                                        |

|   |           |          |                       |          |                                                                             |
|---|-----------|----------|-----------------------|----------|-----------------------------------------------------------------------------|
| 3 | 184395298 | 1.84E+08 | KD2-H4K8ac_peak_21941 | 7.76335  |                                                                             |
| 3 | 184396827 | 1.84E+08 | KD2-H4K8ac_peak_21942 | 13.70753 |                                                                             |
| 3 | 184402847 | 1.84E+08 | KD2-H4K8ac_peak_21943 | 6.40683  |                                                                             |
| 3 | 184409764 | 1.84E+08 | KD2-H4K8ac_peak_21944 | 7.27716  |                                                                             |
| 3 | 184410668 | 1.84E+08 | KD2-H4K8ac_peak_21945 | 5.88845  |                                                                             |
| 3 | 184429100 | 1.84E+08 | KD2-H4K8ac_peak_21946 | 16.61426 | MAGEF1_ENSG00000177383                                                      |
| 3 | 184430111 | 1.84E+08 | KD2-H4K8ac_peak_21947 | 9.36621  | MAGEF1_ENSG00000177383                                                      |
| 3 | 184434553 | 1.84E+08 | KD2-H4K8ac_peak_21948 | 5.57044  |                                                                             |
| 3 | 184443193 | 1.84E+08 | KD2-H4K8ac_peak_21949 | 6.64891  |                                                                             |
| 3 | 184460474 | 1.84E+08 | KD2-H4K8ac_peak_21950 | 9.28039  | RP11-329B9.3_ENSG00000273403;RP11-329B9.5_ENSG00000272922                   |
| 3 | 184490731 | 1.84E+08 | KD2-H4K8ac_peak_21951 | 7.83489  | RP11-329B9.1_ENSG00000229433                                                |
| 3 | 184491207 | 1.84E+08 | KD2-H4K8ac_peak_21952 | 6.25869  | RP11-329B9.1_ENSG00000229433                                                |
| 3 | 184512974 | 1.85E+08 | KD2-H4K8ac_peak_21953 | 12.84642 |                                                                             |
| 3 | 184788355 | 1.85E+08 | KD2-H4K8ac_peak_21954 | 7.45501  |                                                                             |
| 3 | 184870337 | 1.85E+08 | KD2-H4K8ac_peak_21955 | 10.05606 | C3orf70_ENSG00000187068                                                     |
| 3 | 184893486 | 1.85E+08 | KD2-H4K8ac_peak_21956 | 7.1181   |                                                                             |
| 3 | 185000318 | 1.85E+08 | KD2-H4K8ac_peak_21957 | 5.57044  | EHHADH_ENSG00000113790;MAP3K13_ENSG00000073803                              |
| 3 | 185119785 | 1.85E+08 | KD2-H4K8ac_peak_21958 | 10.53596 |                                                                             |
| 3 | 185216258 | 1.85E+08 | KD2-H4K8ac_peak_21959 | 9.63487  | TMEM41A_ENSG00000163900                                                     |
| 3 | 185277063 | 1.85E+08 | KD2-H4K8ac_peak_21960 | 11.92209 |                                                                             |
| 3 | 185655359 | 1.86E+08 | KD2-H4K8ac_peak_21961 | 15.69572 | TRA2B_ENSG00000136527                                                       |
| 3 | 185661202 | 1.86E+08 | KD2-H4K8ac_peak_21962 | 9.34989  |                                                                             |
| 3 | 185815275 | 1.86E+08 | KD2-H4K8ac_peak_21963 | 6.05809  |                                                                             |
| 3 | 185826135 | 1.86E+08 | KD2-H4K8ac_peak_21964 | 6.85193  |                                                                             |
| 3 | 185828099 | 1.86E+08 | KD2-H4K8ac_peak_21965 | 8.55271  | ETV5_ENSG00000244405                                                        |
| 3 | 185927680 | 1.86E+08 | KD2-H4K8ac_peak_21966 | 11.89502 |                                                                             |
| 3 | 185977649 | 1.86E+08 | KD2-H4K8ac_peak_21967 | 4.3289   |                                                                             |
| 3 | 186501100 | 1.87E+08 | KD2-H4K8ac_peak_21968 | 7.76329  | RP11-573D15.9_ENSG00000263826;EIF4A2_ENSG00000156976;SNORD2_ENSG00000238942 |
| 3 | 186524398 | 1.87E+08 | KD2-H4K8ac_peak_21969 | 8.4716   | RFC4_ENSG00000163918;RP11-573D15.3_ENSG00000231724                          |
| 3 | 186648594 | 1.87E+08 | KD2-H4K8ac_peak_21970 | 9.02371  | ST6GAL1_ENSG00000073849                                                     |
| 3 | 186856662 | 1.87E+08 | KD2-H4K8ac_peak_21971 | 8.30974  |                                                                             |
| 3 | 191046119 | 1.91E+08 | KD2-H4K8ac_peak_21972 | 24.85162 | UTS2B_ENSG00000188958;CCDC50_ENSG00000152492                                |
| 3 | 192958716 | 1.93E+08 | KD2-H4K8ac_peak_21973 | 7.40314  | HRASLS_ENSG00000127252                                                      |
| 3 | 193310187 | 1.93E+08 | KD2-H4K8ac_peak_21974 | 7.15405  | ATP13A4_ENSG00000127249;RP11-175P19.2_ENSG00000236297;OPA1_ENSG00000198836  |
| 3 | 193534684 | 1.94E+08 | KD2-H4K8ac_peak_21975 | 4.49837  |                                                                             |
| 3 | 193721364 | 1.94E+08 | KD2-H4K8ac_peak_21976 | 10.87093 | RP11-699L21.1_ENSG00000214146                                               |
| 3 | 193788032 | 1.94E+08 | KD2-H4K8ac_peak_21977 | 22.93827 | RP11-407B7.1_ENSG00000230102                                                |
| 3 | 193789319 | 1.94E+08 | KD2-H4K8ac_peak_21978 | 7.40633  | RP11-407B7.1_ENSG00000230102                                                |
| 3 | 193801208 | 1.94E+08 | KD2-H4K8ac_peak_21979 | 7.76335  |                                                                             |
| 3 | 193810892 | 1.94E+08 | KD2-H4K8ac_peak_21980 | 9.41046  |                                                                             |
| 3 | 193813264 | 1.94E+08 | KD2-H4K8ac_peak_21981 | 8.4939   |                                                                             |
| 3 | 193819701 | 1.94E+08 | KD2-H4K8ac_peak_21982 | 5.07241  |                                                                             |
| 3 | 193852157 | 1.94E+08 | KD2-H4K8ac_peak_21983 | 14.66631 |                                                                             |
| 3 | 193855572 | 1.94E+08 | KD2-H4K8ac_peak_21984 | 6.45083  |                                                                             |
| 3 | 193858544 | 1.94E+08 | KD2-H4K8ac_peak_21985 | 11.04256 |                                                                             |
| 3 | 193859506 | 1.94E+08 | KD2-H4K8ac_peak_21986 | 14.98671 |                                                                             |

|   |           |          |                       |          |                                                                             |
|---|-----------|----------|-----------------------|----------|-----------------------------------------------------------------------------|
| 3 | 193967622 | 1.94E+08 | KD2-H4K8ac_peak_21987 | 4.06758  | RP11-513G11.4_ENSG00000225742                                               |
| 3 | 193973221 | 1.94E+08 | KD2-H4K8ac_peak_21988 | 5.42867  |                                                                             |
| 3 | 193988390 | 1.94E+08 | KD2-H4K8ac_peak_21989 | 12.46522 |                                                                             |
| 3 | 193989288 | 1.94E+08 | KD2-H4K8ac_peak_21990 | 18.62675 |                                                                             |
| 3 | 193991136 | 1.94E+08 | KD2-H4K8ac_peak_21991 | 10.19949 |                                                                             |
| 3 | 193994485 | 1.94E+08 | KD2-H4K8ac_peak_21992 | 3.97079  | RP11-513G11.2_ENSG00000228271                                               |
| 3 | 193995154 | 1.94E+08 | KD2-H4K8ac_peak_21993 | 8.10216  | RP11-513G11.2_ENSG00000228271                                               |
| 3 | 194018029 | 1.94E+08 | KD2-H4K8ac_peak_21994 | 5.30799  |                                                                             |
| 3 | 194030508 | 1.94E+08 | KD2-H4K8ac_peak_21995 | 4.24345  | LINC00887_ENSG00000214145                                                   |
| 3 | 194033267 | 1.94E+08 | KD2-H4K8ac_peak_21996 | 4.03256  |                                                                             |
| 3 | 194102275 | 1.94E+08 | KD2-H4K8ac_peak_21997 | 5.57044  |                                                                             |
| 3 | 194207850 | 1.94E+08 | KD2-H4K8ac_peak_21998 | 14.00658 | LINC00884_ENSG00000233058                                                   |
| 3 | 194353417 | 1.94E+08 | KD2-H4K8ac_peak_21999 | 11.05467 | TMEM44_ENSG00000145014;AC046143.3_ENSG00000229334                           |
| 3 | 194354419 | 1.94E+08 | KD2-H4K8ac_peak_22000 | 7.47462  | TMEM44_ENSG00000145014;AC046143.3_ENSG00000229334                           |
| 3 | 194393419 | 1.94E+08 | KD2-H4K8ac_peak_22001 | 4.77079  | LSG1_ENSG00000041802                                                        |
| 3 | 194395994 | 1.94E+08 | KD2-H4K8ac_peak_22002 | 8.30974  |                                                                             |
| 3 | 194407696 | 1.94E+08 | KD2-H4K8ac_peak_22003 | 5.91443  |                                                                             |
| 3 | 194413186 | 1.94E+08 | KD2-H4K8ac_peak_22004 | 8.1718   |                                                                             |
| 3 | 194489208 | 1.94E+08 | KD2-H4K8ac_peak_22005 | 11.89502 | AC090505.4_ENSG00000230401                                                  |
| 3 | 194573747 | 1.95E+08 | KD2-H4K8ac_peak_22006 | 6.0073   |                                                                             |
| 3 | 194592360 | 1.95E+08 | KD2-H4K8ac_peak_22007 | 10.8368  |                                                                             |
| 3 | 194601609 | 1.95E+08 | KD2-H4K8ac_peak_22008 | 7.47462  |                                                                             |
| 3 | 194651577 | 1.95E+08 | KD2-H4K8ac_peak_22009 | 4.59928  |                                                                             |
| 3 | 194673692 | 1.95E+08 | KD2-H4K8ac_peak_22010 | 6.2781   |                                                                             |
| 3 | 194733455 | 1.95E+08 | KD2-H4K8ac_peak_22011 | 4.01115  |                                                                             |
| 3 | 194734278 | 1.95E+08 | KD2-H4K8ac_peak_22012 | 8.4939   |                                                                             |
| 3 | 194796568 | 1.95E+08 | KD2-H4K8ac_peak_22013 | 6.2781   |                                                                             |
| 3 | 194873691 | 1.95E+08 | KD2-H4K8ac_peak_22014 | 8.26945  |                                                                             |
| 3 | 194875602 | 1.95E+08 | KD2-H4K8ac_peak_22015 | 4.0528   |                                                                             |
| 3 | 194882551 | 1.95E+08 | KD2-H4K8ac_peak_22016 | 6.25869  |                                                                             |
| 3 | 194899396 | 1.95E+08 | KD2-H4K8ac_peak_22017 | 6.34383  |                                                                             |
| 3 | 194900708 | 1.95E+08 | KD2-H4K8ac_peak_22018 | 5.53033  |                                                                             |
| 3 | 194930187 | 1.95E+08 | KD2-H4K8ac_peak_22019 | 7.38799  |                                                                             |
| 3 | 194930756 | 1.95E+08 | KD2-H4K8ac_peak_22020 | 10.01478 |                                                                             |
| 3 | 194967388 | 1.95E+08 | KD2-H4K8ac_peak_22021 | 6.2159   |                                                                             |
| 3 | 194974727 | 1.95E+08 | KD2-H4K8ac_peak_22022 | 14.99078 |                                                                             |
| 3 | 194991182 | 1.95E+08 | KD2-H4K8ac_peak_22023 | 14.56955 | XXYLT1_ENSG00000173950                                                      |
| 3 | 195163209 | 1.95E+08 | KD2-H4K8ac_peak_22024 | 8.5092   | ACAP2_ENSG00000114331                                                       |
| 3 | 195269710 | 1.95E+08 | KD2-H4K8ac_peak_22025 | 10.19949 | PPP1R2_ENSG00000184203;AC091633.3_ENSG00000223711                           |
| 3 | 195384363 | 1.95E+08 | KD2-H4K8ac_peak_22026 | 16.8435  | AC069513.4_ENSG00000229178;LINC00969_ENSG00000242086;SDHAP2_ENSG00000215837 |
| 3 | 195474474 | 1.95E+08 | KD2-H4K8ac_peak_22027 | 6.97919  |                                                                             |
| 3 | 195618531 | 1.96E+08 | KD2-H4K8ac_peak_22028 | 4.70206  |                                                                             |
| 3 | 195619095 | 1.96E+08 | KD2-H4K8ac_peak_22029 | 6.90231  |                                                                             |
| 3 | 195619847 | 1.96E+08 | KD2-H4K8ac_peak_22030 | 5.01002  |                                                                             |
| 3 | 195620678 | 1.96E+08 | KD2-H4K8ac_peak_22031 | 6.18308  |                                                                             |
| 3 | 195622576 | 1.96E+08 | KD2-H4K8ac_peak_22032 | 7.0762   |                                                                             |

|   |           |          |                       |          |                                                                                    |
|---|-----------|----------|-----------------------|----------|------------------------------------------------------------------------------------|
| 3 | 195623947 | 1.96E+08 | KD2-H4K8ac_peak_22033 | 9.90319  |                                                                                    |
| 3 | 195636762 | 1.96E+08 | KD2-H4K8ac_peak_22034 | 7.76329  |                                                                                    |
| 3 | 195641681 | 1.96E+08 | KD2-H4K8ac_peak_22035 | 6.83936  |                                                                                    |
| 3 | 195682172 | 1.96E+08 | KD2-H4K8ac_peak_22036 | 9.15329  |                                                                                    |
| 3 | 195717421 | 1.96E+08 | KD2-H4K8ac_peak_22037 | 17.43368 | SDHAP1_ENSG00000185485                                                             |
| 3 | 195808534 | 1.96E+08 | KD2-H4K8ac_peak_22038 | 10.77651 | TFRC_ENSG00000072274                                                               |
| 3 | 195809676 | 1.96E+08 | KD2-H4K8ac_peak_22039 | 7.40111  | TFRC_ENSG00000072274                                                               |
| 3 | 195913561 | 1.96E+08 | KD2-H4K8ac_peak_22040 | 9.34989  |                                                                                    |
| 3 | 195946527 | 1.96E+08 | KD2-H4K8ac_peak_22041 | 5.75452  |                                                                                    |
| 3 | 196014835 | 1.96E+08 | KD2-H4K8ac_peak_22042 | 19.72117 | PCYT1A_ENSG00000161217                                                             |
| 3 | 196044416 | 1.96E+08 | KD2-H4K8ac_peak_22043 | 9.1707   | RP11-447L10.1_ENSG00000272741;TCTEX1D2_ENSG00000213123;TM4SF19-AS1_ENSG00000235897 |
| 3 | 196045277 | 1.96E+08 | KD2-H4K8ac_peak_22044 | 8.10216  | RP11-447L10.1_ENSG00000272741;TCTEX1D2_ENSG00000213123;TM4SF19-AS1_ENSG00000235897 |
| 3 | 196045796 | 1.96E+08 | KD2-H4K8ac_peak_22045 | 6.56211  | RP11-447L10.1_ENSG00000272741;TCTEX1D2_ENSG00000213123;TM4SF19-AS1_ENSG00000235897 |
| 3 | 196047167 | 1.96E+08 | KD2-H4K8ac_peak_22046 | 6.94255  |                                                                                    |
| 3 | 196158507 | 1.96E+08 | KD2-H4K8ac_peak_22047 | 5.01002  | UBXN7_ENSG00000163960;UBXN7-AS1_ENSG00000225822                                    |
| 3 | 196230893 | 1.96E+08 | KD2-H4K8ac_peak_22048 | 15.9336  | RNF168_ENSG00000163961                                                             |
| 3 | 196255452 | 1.96E+08 | KD2-H4K8ac_peak_22049 | 16.32216 | AC092933.4_ENSG00000213358                                                         |
| 3 | 196295028 | 1.96E+08 | KD2-H4K8ac_peak_22050 | 8.02571  | WDR53_ENSG00000185798;FBXO45_ENSG00000174013                                       |
| 3 | 196295620 | 1.96E+08 | KD2-H4K8ac_peak_22051 | 5.9696   | WDR53_ENSG00000185798;FBXO45_ENSG00000174013                                       |
| 3 | 196358648 | 1.96E+08 | KD2-H4K8ac_peak_22052 | 16.23438 | LINC01063_ENSG00000232065                                                          |
| 3 | 196366201 | 1.96E+08 | KD2-H4K8ac_peak_22053 | 9.65086  | NRROS_ENSG00000174004;PIGX_ENSG00000163964                                         |
| 3 | 196439256 | 1.96E+08 | KD2-H4K8ac_peak_22054 | 10.53377 | CEP19_ENSG00000174007                                                              |
| 3 | 196466976 | 1.96E+08 | KD2-H4K8ac_peak_22055 | 9.63487  | PAK2_ENSG00000180370                                                               |
| 3 | 196668863 | 1.97E+08 | KD2-H4K8ac_peak_22056 | 15.01306 | NCBP2_ENSG00000114503;NCBP2-AS2_ENSG00000270170                                    |
| 3 | 196669583 | 1.97E+08 | KD2-H4K8ac_peak_22057 | 8.10216  | NCBP2_ENSG00000114503;NCBP2-AS2_ENSG00000270170                                    |
| 3 | 196695418 | 1.97E+08 | KD2-H4K8ac_peak_22058 | 9.63487  | PIGZ_ENSG00000119227                                                               |
| 3 | 196729282 | 1.97E+08 | KD2-H4K8ac_peak_22059 | 15.81711 |                                                                                    |
| 3 | 196755697 | 1.97E+08 | KD2-H4K8ac_peak_22060 | 15.58442 | MFI2_ENSG00000163975                                                               |
| 3 | 196757287 | 1.97E+08 | KD2-H4K8ac_peak_22061 | 7.95934  | MFI2_ENSG00000163975                                                               |
| 3 | 197024409 | 1.97E+08 | KD2-H4K8ac_peak_22062 | 9.11031  | DLG1-AS1_ENSG00000227375                                                           |
| 3 | 197025200 | 1.97E+08 | KD2-H4K8ac_peak_22063 | 9.36516  | DLG1_ENSG00000075711;DLG1-AS1_ENSG00000227375                                      |
| 3 | 197025753 | 1.97E+08 | KD2-H4K8ac_peak_22064 | 5.54647  | DLG1_ENSG00000075711;DLG1-AS1_ENSG00000227375                                      |
| 3 | 197062740 | 1.97E+08 | KD2-H4K8ac_peak_22065 | 6.36375  |                                                                                    |
| 3 | 197152962 | 1.97E+08 | KD2-H4K8ac_peak_22066 | 4.87807  |                                                                                    |
| 3 | 197153596 | 1.97E+08 | KD2-H4K8ac_peak_22067 | 7.146    |                                                                                    |
| 3 | 197185150 | 1.97E+08 | KD2-H4K8ac_peak_22068 | 9.15329  | AC128709.3_ENSG00000235126;AC128709.2_ENSG00000237167                              |
| 3 | 197191496 | 1.97E+08 | KD2-H4K8ac_peak_22069 | 3.75035  |                                                                                    |
| 3 | 197192185 | 1.97E+08 | KD2-H4K8ac_peak_22070 | 5.77265  |                                                                                    |
| 3 | 197193509 | 1.97E+08 | KD2-H4K8ac_peak_22071 | 8.86099  |                                                                                    |
| 3 | 197194320 | 1.97E+08 | KD2-H4K8ac_peak_22072 | 10.46264 |                                                                                    |
| 3 | 197211652 | 1.97E+08 | KD2-H4K8ac_peak_22073 | 5.60968  |                                                                                    |
| 3 | 197214025 | 1.97E+08 | KD2-H4K8ac_peak_22074 | 7.64093  |                                                                                    |
| 3 | 197215244 | 1.97E+08 | KD2-H4K8ac_peak_22075 | 7.96322  |                                                                                    |
| 3 | 197216042 | 1.97E+08 | KD2-H4K8ac_peak_22076 | 9.1707   |                                                                                    |
| 3 | 197216838 | 1.97E+08 | KD2-H4K8ac_peak_22077 | 4.36417  |                                                                                    |
| 3 | 197219353 | 1.97E+08 | KD2-H4K8ac_peak_22078 | 4.56666  |                                                                                    |

|   |           |          |                       |          |                                                         |
|---|-----------|----------|-----------------------|----------|---------------------------------------------------------|
| 3 | 197220019 | 1.97E+08 | KD2-H4K8ac_peak_22079 | 6.66692  |                                                         |
| 3 | 197229066 | 1.97E+08 | KD2-H4K8ac_peak_22080 | 5.64429  |                                                         |
| 3 | 197230067 | 1.97E+08 | KD2-H4K8ac_peak_22081 | 5.78354  |                                                         |
| 3 | 197231351 | 1.97E+08 | KD2-H4K8ac_peak_22082 | 6.65673  |                                                         |
| 3 | 197232370 | 1.97E+08 | KD2-H4K8ac_peak_22083 | 5.13615  |                                                         |
| 3 | 197232851 | 1.97E+08 | KD2-H4K8ac_peak_22084 | 4.67342  | RP13-616I3.1_ENSG00000272989;AC128709.1_ENSG00000250443 |
| 3 | 197233505 | 1.97E+08 | KD2-H4K8ac_peak_22085 | 5.02584  | RP13-616I3.1_ENSG00000272989;AC128709.1_ENSG00000250443 |
| 3 | 197236270 | 1.97E+08 | KD2-H4K8ac_peak_22086 | 13.3695  |                                                         |
| 3 | 197246062 | 1.97E+08 | KD2-H4K8ac_peak_22087 | 8.79106  |                                                         |
| 3 | 197247950 | 1.97E+08 | KD2-H4K8ac_peak_22088 | 6.56211  |                                                         |
| 3 | 197282077 | 1.97E+08 | KD2-H4K8ac_peak_22089 | 10.66719 |                                                         |
| 3 | 197354907 | 1.97E+08 | KD2-H4K8ac_peak_22090 | 12.25733 | AC024560.3_ENSG00000214135                              |
| 3 | 197382616 | 1.97E+08 | KD2-H4K8ac_peak_22091 | 12.42547 |                                                         |
| 3 | 197391730 | 1.97E+08 | KD2-H4K8ac_peak_22092 | 8.1718   | AC024560.2_ENSG00000236833                              |
| 3 | 197476197 | 1.97E+08 | KD2-H4K8ac_peak_22093 | 10.29344 | KIAA0226_ENSG00000145016                                |
| 3 | 197476869 | 1.97E+08 | KD2-H4K8ac_peak_22094 | 14.12659 | KIAA0226_ENSG00000145016                                |
| 3 | 197518212 | 1.98E+08 | KD2-H4K8ac_peak_22095 | 13.87818 | LRCH3_ENSG00000186001                                   |
| 3 | 197687162 | 1.98E+08 | KD2-H4K8ac_peak_22096 | 9.08816  | IQCG_ENSG00000114473;LMLN_ENSG00000185621               |
| 4 | 52256     | 52457    | KD2-H4K8ac_peak_22097 | 4.8136   | ZNF595_ENSG00000197701                                  |
| 4 | 52772     | 52995    | KD2-H4K8ac_peak_22098 | 16.1315  | ZNF595_ENSG00000197701                                  |
| 4 | 53261     | 53806    | KD2-H4K8ac_peak_22099 | 16.31433 | ZNF595_ENSG00000197701                                  |
| 4 | 330009    | 331211   | KD2-H4K8ac_peak_22100 | 13.81781 | RP11-478C6.1_ENSG00000251535;ZNF141_ENSG00000131127     |
| 4 | 467295    | 467904   | KD2-H4K8ac_peak_22101 | 25.36636 | ABCA11P_ENSG00000251595                                 |
| 4 | 468397    | 468799   | KD2-H4K8ac_peak_22102 | 6.79289  | ABCA11P_ENSG00000251595                                 |
| 4 | 493048    | 493702   | KD2-H4K8ac_peak_22103 | 16.09057 | ZNF721_ENSG00000182903;PIGG_ENSG00000174227             |
| 4 | 503187    | 503389   | KD2-H4K8ac_peak_22104 | 8.1233   |                                                         |
| 4 | 657081    | 658914   | KD2-H4K8ac_peak_22105 | 17.55491 |                                                         |
| 4 | 667328    | 667716   | KD2-H4K8ac_peak_22106 | 15.34166 | ATP5I_ENSG00000169020;MYL5_ENSG00000215375              |
| 4 | 668357    | 668980   | KD2-H4K8ac_peak_22107 | 12.08081 | ATP5I_ENSG00000169020;MYL5_ENSG00000215375              |
| 4 | 674623    | 675201   | KD2-H4K8ac_peak_22108 | 12.2118  |                                                         |
| 4 | 677520    | 677857   | KD2-H4K8ac_peak_22109 | 8.23274  |                                                         |
| 4 | 678055    | 678691   | KD2-H4K8ac_peak_22110 | 13.80019 |                                                         |
| 4 | 699658    | 699997   | KD2-H4K8ac_peak_22111 | 13.12288 | PCGF3_ENSG00000185619                                   |
| 4 | 775332    | 775594   | KD2-H4K8ac_peak_22112 | 17.16047 | RP11-440L14.1_ENSG00000249592                           |
| 4 | 776410    | 777152   | KD2-H4K8ac_peak_22113 | 14.62911 | RP11-440L14.1_ENSG00000249592                           |
| 4 | 925733    | 926051   | KD2-H4K8ac_peak_22114 | 9.6589   | GAK_ENSG00000178950;TMEM175_ENSG00000127419             |
| 4 | 967526    | 967984   | KD2-H4K8ac_peak_22115 | 11.50346 |                                                         |
| 4 | 980334    | 980579   | KD2-H4K8ac_peak_22116 | 7.47462  | DGKQ_ENSG00000145214;IDUA_ENSG00000127415               |
| 4 | 980888    | 981245   | KD2-H4K8ac_peak_22117 | 6.65673  | DGKQ_ENSG00000145214;IDUA_ENSG00000127415               |
| 4 | 1187817   | 1188740  | KD2-H4K8ac_peak_22118 | 14.8083  |                                                         |
| 4 | 1241761   | 1242467  | KD2-H4K8ac_peak_22119 | 12.82393 | CTBP1-AS2_ENSG00000196810                               |
| 4 | 1243030   | 1243909  | KD2-H4K8ac_peak_22120 | 10.66719 | CTBP1_ENSG00000159692;CTBP1-AS2_ENSG00000196810         |
| 4 | 1282510   | 1282906  | KD2-H4K8ac_peak_22121 | 6.64891  | MAEA_ENSG00000090316                                    |
| 4 | 1283122   | 1283423  | KD2-H4K8ac_peak_22122 | 5.75757  | MAEA_ENSG00000090316                                    |
| 4 | 1283726   | 1284034  | KD2-H4K8ac_peak_22123 | 10.96455 | MAEA_ENSG00000090316                                    |
| 4 | 1340101   | 1340646  | KD2-H4K8ac_peak_22124 | 7.36799  | UVSSA_ENSG00000163945                                   |

|   |         |         |                       |          |                                                       |
|---|---------|---------|-----------------------|----------|-------------------------------------------------------|
| 4 | 1341094 | 1341688 | KD2-H4K8ac_peak_22125 | 7.49599  | UVSSA_ENSG00000163945                                 |
| 4 | 1647167 | 1647500 | KD2-H4K8ac_peak_22126 | 12.40345 |                                                       |
| 4 | 1685518 | 1685926 | KD2-H4K8ac_peak_22127 | 8.10216  | FAM53A_ENSG00000174137;Y_RNA_ENSG00000207009          |
| 4 | 1686339 | 1686920 | KD2-H4K8ac_peak_22128 | 16.8435  | FAM53A_ENSG00000174137                                |
| 4 | 1714622 | 1714953 | KD2-H4K8ac_peak_22129 | 9.1707   | SLBP_ENSG00000163950;RP11-572O17.1_ENSG00000270195    |
| 4 | 1722045 | 1722951 | KD2-H4K8ac_peak_22130 | 11.79585 | TMEM129_ENSG00000168936;TACC3_ENSG00000013810         |
| 4 | 1756010 | 1756292 | KD2-H4K8ac_peak_22131 | 7.13615  |                                                       |
| 4 | 1756694 | 1756928 | KD2-H4K8ac_peak_22132 | 8.17902  |                                                       |
| 4 | 1768474 | 1769601 | KD2-H4K8ac_peak_22133 | 12.84642 |                                                       |
| 4 | 1857378 | 1857801 | KD2-H4K8ac_peak_22134 | 9.96798  | LETM1_ENSG00000168924                                 |
| 4 | 1858240 | 1859179 | KD2-H4K8ac_peak_22135 | 8.55271  | LETM1_ENSG00000168924                                 |
| 4 | 1871838 | 1872677 | KD2-H4K8ac_peak_22136 | 20.18381 | RN7SL671P_ENSG00000240455;WHSC1_ENSG00000109685       |
| 4 | 1873228 | 1873856 | KD2-H4K8ac_peak_22137 | 13.80019 | WHSC1_ENSG00000109685                                 |
| 4 | 1985480 | 1985733 | KD2-H4K8ac_peak_22138 | 4.56666  |                                                       |
| 4 | 2010407 | 2011358 | KD2-H4K8ac_peak_22139 | 10.19949 |                                                       |
| 4 | 2043162 | 2043532 | KD2-H4K8ac_peak_22140 | 9.91109  | NELFA_ENSG00000185049;C4orf48_ENSG00000243449         |
| 4 | 2044012 | 2044415 | KD2-H4K8ac_peak_22141 | 6.90231  | NELFA_ENSG00000185049;C4orf48_ENSG00000243449         |
| 4 | 2060014 | 2060685 | KD2-H4K8ac_peak_22142 | 12.86276 | NAT8L_ENSG00000185818                                 |
| 4 | 2262970 | 2263195 | KD2-H4K8ac_peak_22143 | 7.47462  | MXD4_ENSG00000123933                                  |
| 4 | 2264363 | 2264693 | KD2-H4K8ac_peak_22144 | 9.01262  | MXD4_ENSG00000123933                                  |
| 4 | 2293789 | 2294265 | KD2-H4K8ac_peak_22145 | 6.99815  |                                                       |
| 4 | 2414664 | 2415542 | KD2-H4K8ac_peak_22146 | 7.47462  |                                                       |
| 4 | 2420034 | 2420253 | KD2-H4K8ac_peak_22147 | 10.46874 | ZFYVE28_ENSG00000159733;RP11-503N18.1_ENSG00000206113 |
| 4 | 2463867 | 2464494 | KD2-H4K8ac_peak_22148 | 7.47462  | RNF4_ENSG00000063978                                  |
| 4 | 2470128 | 2470620 | KD2-H4K8ac_peak_22149 | 17.19888 |                                                       |
| 4 | 2470900 | 2471470 | KD2-H4K8ac_peak_22150 | 12.46522 |                                                       |
| 4 | 2536841 | 2537897 | KD2-H4K8ac_peak_22151 | 11.05467 |                                                       |
| 4 | 2538617 | 2539164 | KD2-H4K8ac_peak_22152 | 5.66705  |                                                       |
| 4 | 2600538 | 2600825 | KD2-H4K8ac_peak_22153 | 5.88845  |                                                       |
| 4 | 2757590 | 2758033 | KD2-H4K8ac_peak_22154 | 11.05467 | TNIP2_ENSG00000168884                                 |
| 4 | 2758418 | 2758922 | KD2-H4K8ac_peak_22155 | 5.88845  | TNIP2_ENSG00000168884                                 |
| 4 | 2770583 | 2770937 | KD2-H4K8ac_peak_22156 | 8.30974  |                                                       |
| 4 | 2789647 | 2789929 | KD2-H4K8ac_peak_22157 | 6.62541  |                                                       |
| 4 | 2790403 | 2790642 | KD2-H4K8ac_peak_22158 | 9.02745  |                                                       |
| 4 | 2796360 | 2796666 | KD2-H4K8ac_peak_22159 | 9.06369  |                                                       |
| 4 | 2800289 | 2800976 | KD2-H4K8ac_peak_22160 | 9.08816  |                                                       |
| 4 | 2813782 | 2814224 | KD2-H4K8ac_peak_22161 | 5.14125  |                                                       |
| 4 | 2819464 | 2820593 | KD2-H4K8ac_peak_22162 | 22.7107  |                                                       |
| 4 | 2844682 | 2845374 | KD2-H4K8ac_peak_22163 | 13.36684 | ADD1_ENSG00000087274                                  |
| 4 | 2935363 | 2936060 | KD2-H4K8ac_peak_22164 | 11.51672 | MFSD10_ENSG00000109736;NOP14-AS1_ENSG00000249673      |
| 4 | 2936841 | 2937272 | KD2-H4K8ac_peak_22165 | 7.96322  | MFSD10_ENSG00000109736;NOP14-AS1_ENSG00000249673      |
| 4 | 2964681 | 2965080 | KD2-H4K8ac_peak_22166 | 11.60333 | NOP14_ENSG00000087269;GRK4_ENSG00000125388            |
| 4 | 2965424 | 2965790 | KD2-H4K8ac_peak_22167 | 4.35724  | NOP14_ENSG00000087269;GRK4_ENSG00000125388            |
| 4 | 3018699 | 3018964 | KD2-H4K8ac_peak_22168 | 4.77079  |                                                       |
| 4 | 3075166 | 3075648 | KD2-H4K8ac_peak_22169 | 12.30509 | HTT-AS_ENSG00000251075;HTT_ENSG00000197386            |
| 4 | 3194765 | 3195021 | KD2-H4K8ac_peak_22170 | 9.15329  |                                                       |

|   |         |         |                       |          |                                                       |
|---|---------|---------|-----------------------|----------|-------------------------------------------------------|
| 4 | 3196189 | 3196446 | KD2-H4K8ac_peak_22171 | 7.12754  |                                                       |
| 4 | 3465362 | 3465607 | KD2-H4K8ac_peak_22172 | 7.22457  | DOK7_ENSG00000175920                                  |
| 4 | 3494557 | 3495440 | KD2-H4K8ac_peak_22173 | 6.65673  |                                                       |
| 4 | 3534356 | 3534814 | KD2-H4K8ac_peak_22174 | 11.86082 | LRPAP1_ENSG00000163956                                |
| 4 | 3587031 | 3587253 | KD2-H4K8ac_peak_22175 | 5.9696   |                                                       |
| 4 | 3587781 | 3588043 | KD2-H4K8ac_peak_22176 | 8.06145  |                                                       |
| 4 | 3588472 | 3588692 | KD2-H4K8ac_peak_22177 | 6.76298  |                                                       |
| 4 | 3615720 | 3616639 | KD2-H4K8ac_peak_22178 | 9.34195  |                                                       |
| 4 | 3659817 | 3660774 | KD2-H4K8ac_peak_22179 | 8.52559  |                                                       |
| 4 | 3708758 | 3709547 | KD2-H4K8ac_peak_22180 | 5.75757  |                                                       |
| 4 | 3709802 | 3710254 | KD2-H4K8ac_peak_22181 | 8.4716   |                                                       |
| 4 | 3732743 | 3732978 | KD2-H4K8ac_peak_22182 | 6.37652  |                                                       |
| 4 | 3735053 | 3735287 | KD2-H4K8ac_peak_22183 | 5.23853  |                                                       |
| 4 | 3747969 | 3748168 | KD2-H4K8ac_peak_22184 | 9.1707   |                                                       |
| 4 | 3748632 | 3748987 | KD2-H4K8ac_peak_22185 | 4.85384  |                                                       |
| 4 | 3767170 | 3767573 | KD2-H4K8ac_peak_22186 | 4.8402   | ADRA2C_ENSG00000184160                                |
| 4 | 3782614 | 3782880 | KD2-H4K8ac_peak_22187 | 4.44527  |                                                       |
| 4 | 3787636 | 3787945 | KD2-H4K8ac_peak_22188 | 7.18615  |                                                       |
| 4 | 3829263 | 3830190 | KD2-H4K8ac_peak_22189 | 14.8083  |                                                       |
| 4 | 3957955 | 3958277 | KD2-H4K8ac_peak_22190 | 12.06346 | AC226119.5_ENSG00000253917;FAM86EP_ENSG00000251669    |
| 4 | 4249409 | 4249885 | KD2-H4K8ac_peak_22191 | 11.05407 | TMEM128_ENSG00000132406                               |
| 4 | 4292046 | 4292238 | KD2-H4K8ac_peak_22192 | 9.91109  | LYAR_ENSG00000145220;ZBTB49_ENSG00000168826           |
| 4 | 4388296 | 4388527 | KD2-H4K8ac_peak_22193 | 8.04448  |                                                       |
| 4 | 4388977 | 4389176 | KD2-H4K8ac_peak_22194 | 6.67092  |                                                       |
| 4 | 4543374 | 4543703 | KD2-H4K8ac_peak_22195 | 17.16047 | STX18_ENSG00000168818;STX18-AS1_ENSG00000247708       |
| 4 | 4543899 | 4544187 | KD2-H4K8ac_peak_22196 | 10.05606 | STX18_ENSG00000168818;STX18-AS1_ENSG00000247708       |
| 4 | 5710029 | 5710539 | KD2-H4K8ac_peak_22197 | 6.15357  | EVC2_ENSG00000173040                                  |
| 4 | 5712420 | 5712707 | KD2-H4K8ac_peak_22198 | 8.94469  | EVC_ENSG00000072840                                   |
| 4 | 5712933 | 5713570 | KD2-H4K8ac_peak_22199 | 8.55271  | EVC_ENSG00000072840                                   |
| 4 | 5889461 | 5890235 | KD2-H4K8ac_peak_22200 | 11.04256 |                                                       |
| 4 | 5890492 | 5890763 | KD2-H4K8ac_peak_22201 | 5.88845  |                                                       |
| 4 | 5894194 | 5894398 | KD2-H4K8ac_peak_22202 | 6.72624  | CRMP1_ENSG00000072832                                 |
| 4 | 5957995 | 5958473 | KD2-H4K8ac_peak_22203 | 5.14125  |                                                       |
| 4 | 6163668 | 6164206 | KD2-H4K8ac_peak_22204 | 8.30974  |                                                       |
| 4 | 6173395 | 6173665 | KD2-H4K8ac_peak_22205 | 6.4095   |                                                       |
| 4 | 6177346 | 6177582 | KD2-H4K8ac_peak_22206 | 7.05051  |                                                       |
| 4 | 6179611 | 6179879 | KD2-H4K8ac_peak_22207 | 7.27716  |                                                       |
| 4 | 6200864 | 6201225 | KD2-H4K8ac_peak_22208 | 7.13615  |                                                       |
| 4 | 6201900 | 6202169 | KD2-H4K8ac_peak_22209 | 6.99815  | JAKMIP1_ENSG00000152969;RP11-586D19.1_ENSG00000249896 |
| 4 | 6202440 | 6202699 | KD2-H4K8ac_peak_22210 | 20.42362 | JAKMIP1_ENSG00000152969;RP11-586D19.1_ENSG00000249896 |
| 4 | 6223894 | 6224158 | KD2-H4K8ac_peak_22211 | 4.67342  |                                                       |
| 4 | 6271633 | 6271837 | KD2-H4K8ac_peak_22212 | 8.6308   | WFS1_ENSG00000109501                                  |
| 4 | 6310650 | 6311167 | KD2-H4K8ac_peak_22213 | 9.20193  |                                                       |
| 4 | 6418594 | 6418853 | KD2-H4K8ac_peak_22214 | 8.74596  |                                                       |
| 4 | 6577036 | 6577388 | KD2-H4K8ac_peak_22215 | 6.65673  | MAN2B2_ENSG00000013288                                |
| 4 | 6641461 | 6642152 | KD2-H4K8ac_peak_22216 | 4.44527  | MRFAP1_ENSG00000179010                                |

|   |         |         |                       |          |                                                          |
|---|---------|---------|-----------------------|----------|----------------------------------------------------------|
| 4 | 6674663 | 6674887 | KD2-H4K8ac_peak_22217 | 7.07117  | RP11-539L10.3_ENSG00000251580;AC093323.3_ENSG00000170846 |
| 4 | 6711180 | 6711511 | KD2-H4K8ac_peak_22218 | 8.55271  | MRFAP1L1_ENSG00000178988                                 |
| 4 | 6711851 | 6712088 | KD2-H4K8ac_peak_22219 | 8.5781   | MRFAP1L1_ENSG00000178988                                 |
| 4 | 6717905 | 6718462 | KD2-H4K8ac_peak_22220 | 9.20193  | BLOC1S4_ENSG00000186222                                  |
| 4 | 6751399 | 6751717 | KD2-H4K8ac_peak_22221 | 4.0528   |                                                          |
| 4 | 6763219 | 6763688 | KD2-H4K8ac_peak_22222 | 11.92978 |                                                          |
| 4 | 6773072 | 6773461 | KD2-H4K8ac_peak_22223 | 4.77079  |                                                          |
| 4 | 6783891 | 6784257 | KD2-H4K8ac_peak_22224 | 11.05467 | KIAA0232_ENSG00000170871                                 |
| 4 | 6784490 | 6785261 | KD2-H4K8ac_peak_22225 | 13.9234  |                                                          |
| 4 | 6911209 | 6911894 | KD2-H4K8ac_peak_22226 | 12.08081 | TBC1D14_ENSG00000132405                                  |
| 4 | 7045322 | 7045638 | KD2-H4K8ac_peak_22227 | 9.70057  | CCDC96_ENSG00000173013                                   |
| 4 | 7069465 | 7069673 | KD2-H4K8ac_peak_22228 | 5.405    | GRPEL1_ENSG00000109519                                   |
| 4 | 7075140 | 7075351 | KD2-H4K8ac_peak_22229 | 6.56926  |                                                          |
| 4 | 7103504 | 7103835 | KD2-H4K8ac_peak_22230 | 13.92465 |                                                          |
| 4 | 7141439 | 7141638 | KD2-H4K8ac_peak_22231 | 4.40093  |                                                          |
| 4 | 7207958 | 7208247 | KD2-H4K8ac_peak_22232 | 5.91443  |                                                          |
| 4 | 7208701 | 7209416 | KD2-H4K8ac_peak_22233 | 18.68247 |                                                          |
| 4 | 7209740 | 7209981 | KD2-H4K8ac_peak_22234 | 7.40314  |                                                          |
| 4 | 7227305 | 7229265 | KD2-H4K8ac_peak_22235 | 14.43704 |                                                          |
| 4 | 7253854 | 7254115 | KD2-H4K8ac_peak_22236 | 5.557    |                                                          |
| 4 | 7399399 | 7399794 | KD2-H4K8ac_peak_22237 | 4.77079  |                                                          |
| 4 | 7818342 | 7818582 | KD2-H4K8ac_peak_22238 | 10.58016 |                                                          |
| 4 | 7820709 | 7820909 | KD2-H4K8ac_peak_22239 | 8.69797  |                                                          |
| 4 | 7821843 | 7822037 | KD2-H4K8ac_peak_22240 | 7.99241  |                                                          |
| 4 | 7882297 | 7882509 | KD2-H4K8ac_peak_22241 | 5.57044  |                                                          |
| 4 | 7887883 | 7888132 | KD2-H4K8ac_peak_22242 | 5.15777  |                                                          |
| 4 | 7894416 | 7894624 | KD2-H4K8ac_peak_22243 | 10.08707 |                                                          |
| 4 | 7894954 | 7895196 | KD2-H4K8ac_peak_22244 | 8.76725  |                                                          |
| 4 | 7896230 | 7896458 | KD2-H4K8ac_peak_22245 | 5.75757  |                                                          |
| 4 | 7899277 | 7899487 | KD2-H4K8ac_peak_22246 | 5.11586  |                                                          |
| 4 | 7899872 | 7900134 | KD2-H4K8ac_peak_22247 | 6.75424  |                                                          |
| 4 | 7904444 | 7905352 | KD2-H4K8ac_peak_22248 | 8.10216  |                                                          |
| 4 | 7906505 | 7906834 | KD2-H4K8ac_peak_22249 | 4.42765  |                                                          |
| 4 | 7907483 | 7907833 | KD2-H4K8ac_peak_22250 | 14.66631 |                                                          |
| 4 | 7912263 | 7912682 | KD2-H4K8ac_peak_22251 | 11.47476 |                                                          |
| 4 | 7940993 | 7941412 | KD2-H4K8ac_peak_22252 | 8.04448  | AFAP1_ENSG00000196526;AC097381.1_ENSG00000228919         |
| 4 | 7951272 | 7951720 | KD2-H4K8ac_peak_22253 | 11.86708 |                                                          |
| 4 | 7989436 | 7989673 | KD2-H4K8ac_peak_22254 | 7.27716  |                                                          |
| 4 | 8012025 | 8012325 | KD2-H4K8ac_peak_22255 | 9.36516  |                                                          |
| 4 | 8052006 | 8052987 | KD2-H4K8ac_peak_22256 | 12.82393 |                                                          |
| 4 | 8129753 | 8130009 | KD2-H4K8ac_peak_22257 | 5.51783  |                                                          |
| 4 | 8160882 | 8161094 | KD2-H4K8ac_peak_22258 | 9.08816  | ABLIM2_ENSG00000163995                                   |
| 4 | 8190977 | 8191292 | KD2-H4K8ac_peak_22259 | 4.44527  |                                                          |
| 4 | 8193178 | 8193509 | KD2-H4K8ac_peak_22260 | 5.97274  |                                                          |
| 4 | 8194308 | 8194514 | KD2-H4K8ac_peak_22261 | 8.82427  |                                                          |
| 4 | 8200151 | 8200772 | KD2-H4K8ac_peak_22262 | 8.85813  |                                                          |



|   |          |          |                       |          |                                                 |
|---|----------|----------|-----------------------|----------|-------------------------------------------------|
| 4 | 8201090  | 8201764  | KD2-H4K8ac_peak_22263 | 7.70067  |                                                 |
| 4 | 8207502  | 8207731  | KD2-H4K8ac_peak_22264 | 4.67342  |                                                 |
| 4 | 8224691  | 8224892  | KD2-H4K8ac_peak_22265 | 6.83936  |                                                 |
| 4 | 8230153  | 8230850  | KD2-H4K8ac_peak_22266 | 5.32397  |                                                 |
| 4 | 8244278  | 8244668  | KD2-H4K8ac_peak_22267 | 10.05606 |                                                 |
| 4 | 8261592  | 8261833  | KD2-H4K8ac_peak_22268 | 6.39197  |                                                 |
| 4 | 8263602  | 8263798  | KD2-H4K8ac_peak_22269 | 6.22239  |                                                 |
| 4 | 8268709  | 8269026  | KD2-H4K8ac_peak_22270 | 5.57044  |                                                 |
| 4 | 8274528  | 8275191  | KD2-H4K8ac_peak_22271 | 7.79741  |                                                 |
| 4 | 8275502  | 8275707  | KD2-H4K8ac_peak_22272 | 5.14125  |                                                 |
| 4 | 8275966  | 8276431  | KD2-H4K8ac_peak_22273 | 11.79585 |                                                 |
| 4 | 8276892  | 8277511  | KD2-H4K8ac_peak_22274 | 5.75757  |                                                 |
| 4 | 8287456  | 8287663  | KD2-H4K8ac_peak_22275 | 6.66692  |                                                 |
| 4 | 8317837  | 8318327  | KD2-H4K8ac_peak_22276 | 4.98072  |                                                 |
| 4 | 8342465  | 8342809  | KD2-H4K8ac_peak_22277 | 5.14125  |                                                 |
| 4 | 8598762  | 8599013  | KD2-H4K8ac_peak_22278 | 4.36417  |                                                 |
| 4 | 8706479  | 8707555  | KD2-H4K8ac_peak_22279 | 7.47462  |                                                 |
| 4 | 8873961  | 8874335  | KD2-H4K8ac_peak_22280 | 4.42765  | HMX1_ENSG00000215612                            |
| 4 | 8894574  | 8894845  | KD2-H4K8ac_peak_22281 | 10.63441 |                                                 |
| 4 | 8910189  | 8910447  | KD2-H4K8ac_peak_22282 | 4.73064  |                                                 |
| 4 | 8912363  | 8913457  | KD2-H4K8ac_peak_22283 | 7.29632  |                                                 |
| 4 | 9153843  | 9154260  | KD2-H4K8ac_peak_22284 | 10.0692  | FAM86KP_ENSG00000163612                         |
| 4 | 9155155  | 9155392  | KD2-H4K8ac_peak_22285 | 6.76298  | FAM86KP_ENSG00000163612                         |
| 4 | 9382663  | 9383070  | KD2-H4K8ac_peak_22286 | 10.21502 |                                                 |
| 4 | 9533996  | 9534203  | KD2-H4K8ac_peak_22287 | 7.59643  |                                                 |
| 4 | 10020607 | 10020804 | KD2-H4K8ac_peak_22288 | 7.47462  |                                                 |
| 4 | 10118112 | 10118425 | KD2-H4K8ac_peak_22289 | 8.37231  | WDR1_ENSG00000071127;RNA5SP155_ENSG00000223086  |
| 4 | 12610990 | 12611446 | KD2-H4K8ac_peak_22290 | 10.05606 |                                                 |
| 4 | 13143969 | 13144242 | KD2-H4K8ac_peak_22291 | 9.23578  |                                                 |
| 4 | 13485399 | 13485814 | KD2-H4K8ac_peak_22292 | 8.00457  | RAB28_ENSG00000157869                           |
| 4 | 13486401 | 13486598 | KD2-H4K8ac_peak_22293 | 10.1591  | RAB28_ENSG00000157869                           |
| 4 | 13628956 | 13629294 | KD2-H4K8ac_peak_22294 | 6.45083  | BOD1L1_ENSG00000038219;MIR5091_ENSG00000266240  |
| 4 | 13655928 | 13656254 | KD2-H4K8ac_peak_22295 | 5.75452  | RP11-341G5.1_ENSG00000250634                    |
| 4 | 15003147 | 15003569 | KD2-H4K8ac_peak_22296 | 4.77079  | CPEB2-AS1_ENSG00000247624;CPEB2_ENSG00000137449 |
| 4 | 15004164 | 15004729 | KD2-H4K8ac_peak_22297 | 9.51625  | CPEB2-AS1_ENSG00000247624;CPEB2_ENSG00000137449 |
| 4 | 15005028 | 15005671 | KD2-H4K8ac_peak_22298 | 6.60096  | CPEB2_ENSG00000137449                           |
| 4 | 15005911 | 15006686 | KD2-H4K8ac_peak_22299 | 6.25869  |                                                 |
| 4 | 15022559 | 15022766 | KD2-H4K8ac_peak_22300 | 9.15329  |                                                 |
| 4 | 15134791 | 15135113 | KD2-H4K8ac_peak_22301 | 11.30637 |                                                 |
| 4 | 15149061 | 15150069 | KD2-H4K8ac_peak_22302 | 10.1591  |                                                 |
| 4 | 15150285 | 15150816 | KD2-H4K8ac_peak_22303 | 7.51935  |                                                 |
| 4 | 15481144 | 15481510 | KD2-H4K8ac_peak_22304 | 15.39543 |                                                 |
| 4 | 15656545 | 15656874 | KD2-H4K8ac_peak_22305 | 10.05606 |                                                 |
| 4 | 15657163 | 15657530 | KD2-H4K8ac_peak_22306 | 13.95627 |                                                 |
| 4 | 15683467 | 15683831 | KD2-H4K8ac_peak_22307 | 16.32216 | FBXL5_ENSG00000118564;FAM200B_ENSG00000237765   |
| 4 | 15704349 | 15704989 | KD2-H4K8ac_peak_22308 | 10.96455 | BST1_ENSG00000109743                            |

|   |          |          |                       |          |                                                                               |
|---|----------|----------|-----------------------|----------|-------------------------------------------------------------------------------|
| 4 | 16084327 | 16084865 | KD2-H4K8ac_peak_22309 | 5.9696   |                                                                               |
| 4 | 16227713 | 16227980 | KD2-H4K8ac_peak_22310 | 7.27716  | TAPT1-AS1_ENSG00000263327                                                     |
| 4 | 16228281 | 16228821 | KD2-H4K8ac_peak_22311 | 16.63953 | TAPT1_ENSG00000169762;TAPT1-AS1_ENSG00000263327                               |
| 4 | 17128474 | 17128748 | KD2-H4K8ac_peak_22312 | 6.16888  |                                                                               |
| 4 | 17491565 | 17492168 | KD2-H4K8ac_peak_22313 | 5.14125  |                                                                               |
| 4 | 17513273 | 17513654 | KD2-H4K8ac_peak_22314 | 7.07117  | QDPR_ENSG00000151552                                                          |
| 4 | 17614866 | 17615396 | KD2-H4K8ac_peak_22315 | 6.82976  | AC006160.5_ENSG00000249502;MED28_ENSG00000118579                              |
| 4 | 17616387 | 17616785 | KD2-H4K8ac_peak_22316 | 12.88108 | AC006160.5_ENSG00000249502;MED28_ENSG00000118579                              |
| 4 | 17669506 | 17669703 | KD2-H4K8ac_peak_22317 | 6.16888  |                                                                               |
| 4 | 17672775 | 17673149 | KD2-H4K8ac_peak_22318 | 11.30637 |                                                                               |
| 4 | 17811994 | 17812200 | KD2-H4K8ac_peak_22319 | 6.25869  | DCAF16_ENSG00000163257;NCAPG_ENSG00000109805                                  |
| 4 | 18022930 | 18023262 | KD2-H4K8ac_peak_22320 | 8.1718   | LCORL_ENSG00000178177                                                         |
| 4 | 18320850 | 18321212 | KD2-H4K8ac_peak_22321 | 11.30637 |                                                                               |
| 4 | 20701215 | 20701667 | KD2-H4K8ac_peak_22322 | 5.25071  |                                                                               |
| 4 | 20702111 | 20702333 | KD2-H4K8ac_peak_22323 | 7.45501  |                                                                               |
| 4 | 22517107 | 22517623 | KD2-H4K8ac_peak_22324 | 14.87555 | GPR125_ENSG00000152990                                                        |
| 4 | 22517831 | 22518216 | KD2-H4K8ac_peak_22325 | 11.75669 | GPR125_ENSG00000152990                                                        |
| 4 | 24585611 | 24586054 | KD2-H4K8ac_peak_22326 | 17.19888 | DHX15_ENSG00000109606                                                         |
| 4 | 24586536 | 24586858 | KD2-H4K8ac_peak_22327 | 13.39763 | DHX15_ENSG00000109606                                                         |
| 4 | 25161271 | 25161488 | KD2-H4K8ac_peak_22328 | 6.76298  | SEPSECS_ENSG00000109618;PI4K2B_ENSG00000038210                                |
| 4 | 25161737 | 25162011 | KD2-H4K8ac_peak_22329 | 9.95119  | SEPSECS_ENSG00000109618;PI4K2B_ENSG00000038210                                |
| 4 | 25235677 | 25236088 | KD2-H4K8ac_peak_22330 | 12.08081 |                                                                               |
| 4 | 25377973 | 25378545 | KD2-H4K8ac_peak_22331 | 11.05407 | ANAPC4_ENSG00000053900                                                        |
| 4 | 25378872 | 25379093 | KD2-H4K8ac_peak_22332 | 7.36799  | ANAPC4_ENSG00000053900                                                        |
| 4 | 25914993 | 25915230 | KD2-H4K8ac_peak_22333 | 9.96798  |                                                                               |
| 4 | 26321484 | 26321817 | KD2-H4K8ac_peak_22334 | 9.15069  |                                                                               |
| 4 | 26805197 | 26805407 | KD2-H4K8ac_peak_22335 | 4.06758  |                                                                               |
| 4 | 26858846 | 26859140 | KD2-H4K8ac_peak_22336 | 8.5092   | STIM2_ENSG00000109689                                                         |
| 4 | 26859467 | 26859677 | KD2-H4K8ac_peak_22337 | 6.97919  | STIM2_ENSG00000109689                                                         |
| 4 | 26862598 | 26862860 | KD2-H4K8ac_peak_22338 | 6.25869  | RP11-293A21.1_ENSG00000240005                                                 |
| 4 | 30836949 | 30837261 | KD2-H4K8ac_peak_22339 | 7.12754  |                                                                               |
| 4 | 37675380 | 37675636 | KD2-H4K8ac_peak_22340 | 6.66692  |                                                                               |
| 4 | 37688965 | 37689331 | KD2-H4K8ac_peak_22341 | 5.77029  | RELL1_ENSG00000181826                                                         |
| 4 | 37828344 | 37828709 | KD2-H4K8ac_peak_22342 | 12.00597 | PGM2_ENSG00000169299                                                          |
| 4 | 37892568 | 37892800 | KD2-H4K8ac_peak_22343 | 5.54647  | TBC1D1_ENSG00000065882                                                        |
| 4 | 37979196 | 37979422 | KD2-H4K8ac_peak_22344 | 8.86099  |                                                                               |
| 4 | 38321740 | 38322147 | KD2-H4K8ac_peak_22345 | 8.1233   |                                                                               |
| 4 | 38384863 | 38385095 | KD2-H4K8ac_peak_22346 | 4.211    |                                                                               |
| 4 | 38664661 | 38665346 | KD2-H4K8ac_peak_22347 | 7.76104  | KLF3_ENSG00000109787                                                          |
| 4 | 38665937 | 38666484 | KD2-H4K8ac_peak_22348 | 9.50015  | RP11-617D20.1_ENSG00000231160;AC021860.1_ENSG00000196355;KLF3_ENSG00000109787 |
| 4 | 38869030 | 38869963 | KD2-H4K8ac_peak_22349 | 7.07117  | FAM114A1_ENSG00000197712;MIR574_ENSG00000207944                               |
| 4 | 39038911 | 39039109 | KD2-H4K8ac_peak_22350 | 5.07901  |                                                                               |
| 4 | 39046245 | 39047007 | KD2-H4K8ac_peak_22351 | 11.89502 | KLHL5_ENSG00000109790                                                         |
| 4 | 39367590 | 39368584 | KD2-H4K8ac_peak_22352 | 7.40314  | RFC1_ENSG00000035928                                                          |
| 4 | 39460740 | 39461119 | KD2-H4K8ac_peak_22353 | 11.05407 | RPL9_ENSG00000163682;LIAS_ENSG00000121897                                     |
| 4 | 39528601 | 39528963 | KD2-H4K8ac_peak_22354 | 8.28234  | UGDH_ENSG00000109814;UGDH-AS1_ENSG00000249348                                 |

|   |          |          |                       |          |                                                      |
|---|----------|----------|-----------------------|----------|------------------------------------------------------|
| 4 | 39529362 | 39530032 | KD2-H4K8ac_peak_22355 | 17.27897 | UGDH_ENSG00000109814;UGDH-AS1_ENSG00000249348        |
| 4 | 39641158 | 39641392 | KD2-H4K8ac_peak_22356 | 6.00226  | SMIM14_ENSG00000163683;RP11-539G18.2_ENSG00000255458 |
| 4 | 39699362 | 39699594 | KD2-H4K8ac_peak_22357 | 8.17902  | UBE2K_ENSG00000078140                                |
| 4 | 39699804 | 39700344 | KD2-H4K8ac_peak_22358 | 11.79585 | UBE2K_ENSG00000078140                                |
| 4 | 39978642 | 39979490 | KD2-H4K8ac_peak_22359 | 7.07117  | PDS5A_ENSG00000121892                                |
| 4 | 39979819 | 39980073 | KD2-H4K8ac_peak_22360 | 7.44324  | PDS5A_ENSG00000121892                                |
| 4 | 40055991 | 40056206 | KD2-H4K8ac_peak_22361 | 4.12757  |                                                      |
| 4 | 40057471 | 40058188 | KD2-H4K8ac_peak_22362 | 12.36441 | RP11-333E13.4_ENSG00000205794;N4BP2_ENSG00000078177  |
| 4 | 40058395 | 40059196 | KD2-H4K8ac_peak_22363 | 12.93253 | RP11-333E13.4_ENSG00000205794;N4BP2_ENSG00000078177  |
| 4 | 40266723 | 40267422 | KD2-H4K8ac_peak_22364 | 5.40638  | RP11-395I6.2_ENSG00000250338                         |
| 4 | 40318889 | 40319107 | KD2-H4K8ac_peak_22365 | 5.54647  | AC195454.1_ENSG00000249241                           |
| 4 | 40631592 | 40631865 | KD2-H4K8ac_peak_22366 | 7.83656  |                                                      |
| 4 | 40751709 | 40752425 | KD2-H4K8ac_peak_22367 | 6.40297  | NSUN7_ENSG00000179299                                |
| 4 | 40884242 | 40884443 | KD2-H4K8ac_peak_22368 | 7.18916  |                                                      |
| 4 | 41218546 | 41219042 | KD2-H4K8ac_peak_22369 | 20.42362 | APBB2_ENSG00000163697                                |
| 4 | 41259059 | 41259517 | KD2-H4K8ac_peak_22370 | 13.13965 | UCHL1-AS1_ENSG00000251173;UCHL1_ENSG00000154277      |
| 4 | 41361159 | 41361782 | KD2-H4K8ac_peak_22371 | 17.19888 | LIMCH1_ENSG00000064042                               |
| 4 | 41361985 | 41362605 | KD2-H4K8ac_peak_22372 | 6.66359  | LIMCH1_ENSG00000064042                               |
| 4 | 41362894 | 41363582 | KD2-H4K8ac_peak_22373 | 11.89502 |                                                      |
| 4 | 41386225 | 41386878 | KD2-H4K8ac_peak_22374 | 7.29632  |                                                      |
| 4 | 41468116 | 41468333 | KD2-H4K8ac_peak_22375 | 7.05051  |                                                      |
| 4 | 41592175 | 41592454 | KD2-H4K8ac_peak_22376 | 7.70289  |                                                      |
| 4 | 41640622 | 41640871 | KD2-H4K8ac_peak_22377 | 6.94255  |                                                      |
| 4 | 41689054 | 41689483 | KD2-H4K8ac_peak_22378 | 7.12754  |                                                      |
| 4 | 41733654 | 41733940 | KD2-H4K8ac_peak_22379 | 4.77079  |                                                      |
| 4 | 41747395 | 41748096 | KD2-H4K8ac_peak_22380 | 11.03331 |                                                      |
| 4 | 41748324 | 41749626 | KD2-H4K8ac_peak_22381 | 11.89502 | RP11-227F19.1_ENSG00000250467                        |
| 4 | 41750334 | 41750631 | KD2-H4K8ac_peak_22382 | 7.38933  | PHOX2B_ENSG00000109132;RP11-227F19.1_ENSG00000250467 |
| 4 | 41751749 | 41752021 | KD2-H4K8ac_peak_22383 | 10.96455 | PHOX2B_ENSG00000109132;RP11-227F19.2_ENSG00000249122 |
| 4 | 41752792 | 41753065 | KD2-H4K8ac_peak_22384 | 6.56211  | RP11-227F19.2_ENSG00000249122                        |
| 4 | 41753262 | 41754161 | KD2-H4K8ac_peak_22385 | 20.57085 | RP11-227F19.2_ENSG00000249122                        |
| 4 | 41786056 | 41786434 | KD2-H4K8ac_peak_22386 | 5.25071  |                                                      |
| 4 | 41787076 | 41787375 | KD2-H4K8ac_peak_22387 | 14.74047 |                                                      |
| 4 | 41790055 | 41790247 | KD2-H4K8ac_peak_22388 | 6.40683  |                                                      |
| 4 | 41823160 | 41823488 | KD2-H4K8ac_peak_22389 | 4.76709  |                                                      |
| 4 | 41836733 | 41836967 | KD2-H4K8ac_peak_22390 | 9.34989  |                                                      |
| 4 | 41848393 | 41848662 | KD2-H4K8ac_peak_22391 | 8.17902  |                                                      |
| 4 | 41857706 | 41857960 | KD2-H4K8ac_peak_22392 | 6.99815  |                                                      |
| 4 | 41864486 | 41864817 | KD2-H4K8ac_peak_22393 | 8.1718   |                                                      |
| 4 | 41865297 | 41865711 | KD2-H4K8ac_peak_22394 | 6.0073   |                                                      |
| 4 | 41868323 | 41869537 | KD2-H4K8ac_peak_22395 | 10.05606 |                                                      |
| 4 | 41875394 | 41875841 | KD2-H4K8ac_peak_22396 | 11.90231 |                                                      |
| 4 | 41876527 | 41876756 | KD2-H4K8ac_peak_22397 | 12.00597 |                                                      |
| 4 | 41877531 | 41877779 | KD2-H4K8ac_peak_22398 | 4.53319  |                                                      |
| 4 | 41879250 | 41880003 | KD2-H4K8ac_peak_22399 | 15.50259 |                                                      |
| 4 | 41880297 | 41881444 | KD2-H4K8ac_peak_22400 | 9.26408  |                                                      |

|   |          |          |                       |          |                                                                       |
|---|----------|----------|-----------------------|----------|-----------------------------------------------------------------------|
| 4 | 41881654 | 41884524 | KD2-H4K8ac_peak_22401 | 23.67389 | LINC00682_ENSG00000245870                                             |
| 4 | 41885195 | 41885399 | KD2-H4K8ac_peak_22402 | 4.82973  | LINC00682_ENSG00000245870                                             |
| 4 | 41888532 | 41888767 | KD2-H4K8ac_peak_22403 | 3.83999  |                                                                       |
| 4 | 41937269 | 41937792 | KD2-H4K8ac_peak_22404 | 6.20982  | TMEM33_ENSG00000109133                                                |
| 4 | 42152662 | 42152902 | KD2-H4K8ac_peak_22405 | 5.30799  |                                                                       |
| 4 | 42153320 | 42153621 | KD2-H4K8ac_peak_22406 | 9.08816  |                                                                       |
| 4 | 42154002 | 42154913 | KD2-H4K8ac_peak_22407 | 9.65086  | BEND4_ENSG00000188848                                                 |
| 4 | 42307621 | 42307960 | KD2-H4K8ac_peak_22408 | 4.06758  |                                                                       |
| 4 | 42309823 | 42310350 | KD2-H4K8ac_peak_22409 | 14.52995 |                                                                       |
| 4 | 42310872 | 42311444 | KD2-H4K8ac_peak_22410 | 9.73431  |                                                                       |
| 4 | 42312268 | 42312545 | KD2-H4K8ac_peak_22411 | 6.99815  |                                                                       |
| 4 | 42312928 | 42313183 | KD2-H4K8ac_peak_22412 | 8.58069  |                                                                       |
| 4 | 42317588 | 42317780 | KD2-H4K8ac_peak_22413 | 4.77079  |                                                                       |
| 4 | 42485461 | 42486046 | KD2-H4K8ac_peak_22414 | 9.50015  |                                                                       |
| 4 | 42658698 | 42659044 | KD2-H4K8ac_peak_22415 | 9.51625  | ATP8A1_ENSG00000124406;RP11-109E24.2_ENSG00000260519                  |
| 4 | 42659399 | 42659780 | KD2-H4K8ac_peak_22416 | 10.43145 | ATP8A1_ENSG00000124406;RP11-109E24.2_ENSG00000260519                  |
| 4 | 42660162 | 42660456 | KD2-H4K8ac_peak_22417 | 8.66387  | RP11-109E24.2_ENSG00000260519                                         |
| 4 | 42677418 | 42677743 | KD2-H4K8ac_peak_22418 | 5.57044  |                                                                       |
| 4 | 44680471 | 44680664 | KD2-H4K8ac_peak_22419 | 6.66692  | YIPF7_ENSG00000177752;GUF1_ENSG00000151806                            |
| 4 | 44728293 | 44728530 | KD2-H4K8ac_peak_22420 | 11.2938  | GNPDA2_ENSG00000163281                                                |
| 4 | 46996147 | 46996345 | KD2-H4K8ac_peak_22421 | 5.57044  | GABRA4_ENSG00000109158;GABRB1_ENSG00000163288                         |
| 4 | 47465229 | 47465700 | KD2-H4K8ac_peak_22422 | 19.6416  | COMMD8_ENSG00000169019                                                |
| 4 | 47915824 | 47916423 | KD2-H4K8ac_peak_22423 | 4.91674  | NFXL1_ENSG00000170448;NIPAL1_ENSG00000163293                          |
| 4 | 48272047 | 48272362 | KD2-H4K8ac_peak_22424 | 6.25869  | TEC_ENSG00000135605                                                   |
| 4 | 48343659 | 48344181 | KD2-H4K8ac_peak_22425 | 10.77651 | SLAIN2_ENSG00000109171                                                |
| 4 | 48484415 | 48484639 | KD2-H4K8ac_peak_22426 | 5.57044  | SLC10A4_ENSG00000145248                                               |
| 4 | 48485537 | 48486433 | KD2-H4K8ac_peak_22427 | 13.87818 | SLC10A4_ENSG00000145248                                               |
| 4 | 48781328 | 48782203 | KD2-H4K8ac_peak_22428 | 9.36516  | FRYL_ENSG00000075539                                                  |
| 4 | 48782748 | 48783092 | KD2-H4K8ac_peak_22429 | 6.40683  | FRYL_ENSG00000075539                                                  |
| 4 | 48832681 | 48832888 | KD2-H4K8ac_peak_22430 | 11.70505 |                                                                       |
| 4 | 48833166 | 48833552 | KD2-H4K8ac_peak_22431 | 12.13241 |                                                                       |
| 4 | 48908019 | 48909602 | KD2-H4K8ac_peak_22432 | 10.29842 | OCIAD2_ENSG00000145247                                                |
| 4 | 52861893 | 52862299 | KD2-H4K8ac_peak_22433 | 8.1233   |                                                                       |
| 4 | 52903916 | 52904164 | KD2-H4K8ac_peak_22434 | 10.21502 | SGCB_ENSG00000163069                                                  |
| 4 | 52904408 | 52904950 | KD2-H4K8ac_peak_22435 | 6.40297  | SGCB_ENSG00000163069                                                  |
| 4 | 53524881 | 53525312 | KD2-H4K8ac_peak_22436 | 10.96455 | USP46_ENSG00000109189;USP46-AS1_ENSG00000248866                       |
| 4 | 53525593 | 53526355 | KD2-H4K8ac_peak_22437 | 9.1707   | USP46_ENSG00000109189;USP46-AS1_ENSG00000248866                       |
| 4 | 53578727 | 53579199 | KD2-H4K8ac_peak_22438 | 8.34752  | DANCR_ENSG00000226950;MIR4449_ENSG00000264585;SNORA26_ENSG00000212588 |
| 4 | 53588123 | 53588473 | KD2-H4K8ac_peak_22439 | 12.00273 |                                                                       |
| 4 | 53589283 | 53589646 | KD2-H4K8ac_peak_22440 | 7.12754  |                                                                       |
| 4 | 53617200 | 53617506 | KD2-H4K8ac_peak_22441 | 5.45396  | ERVMER34-1_ENSG00000226887;AC104066.1_ENSG00000266656                 |
| 4 | 53617734 | 53618142 | KD2-H4K8ac_peak_22442 | 5.54647  | ERVMER34-1_ENSG00000226887;AC104066.1_ENSG00000266656                 |
| 4 | 53706818 | 53707226 | KD2-H4K8ac_peak_22443 | 6.47635  |                                                                       |
| 4 | 53707737 | 53707951 | KD2-H4K8ac_peak_22444 | 4.86324  |                                                                       |
| 4 | 53708229 | 53708432 | KD2-H4K8ac_peak_22445 | 5.45396  |                                                                       |
| 4 | 53727911 | 53728297 | KD2-H4K8ac_peak_22446 | 12.84642 | RASL11B_ENSG00000128045                                               |

|   |          |          |                       |          |                                                    |
|---|----------|----------|-----------------------|----------|----------------------------------------------------|
| 4 | 53730667 | 53731067 | KD2-H4K8ac_peak_22447 | 7.13615  |                                                    |
| 4 | 53731585 | 53732207 | KD2-H4K8ac_peak_22448 | 8.69797  |                                                    |
| 4 | 53733810 | 53734881 | KD2-H4K8ac_peak_22449 | 9.242    |                                                    |
| 4 | 53736128 | 53736926 | KD2-H4K8ac_peak_22450 | 6.66692  |                                                    |
| 4 | 53858417 | 53858838 | KD2-H4K8ac_peak_22451 | 6.14031  |                                                    |
| 4 | 53861422 | 53862081 | KD2-H4K8ac_peak_22452 | 11.11809 |                                                    |
| 4 | 53863062 | 53863816 | KD2-H4K8ac_peak_22453 | 10.08707 |                                                    |
| 4 | 53915551 | 53915765 | KD2-H4K8ac_peak_22454 | 4.95193  |                                                    |
| 4 | 53916129 | 53916332 | KD2-H4K8ac_peak_22455 | 5.71749  |                                                    |
| 4 | 54231579 | 54231818 | KD2-H4K8ac_peak_22456 | 6.16888  | SCFD2_ENSG00000184178                              |
| 4 | 54243894 | 54244431 | KD2-H4K8ac_peak_22457 | 9.8758   | FIP1L1_ENSG00000145216                             |
| 4 | 54567447 | 54568151 | KD2-H4K8ac_peak_22458 | 8.94469  | LNK1_ENSG00000072201                               |
| 4 | 54568593 | 54568790 | KD2-H4K8ac_peak_22459 | 4.86324  |                                                    |
| 4 | 54569180 | 54569627 | KD2-H4K8ac_peak_22460 | 8.6308   |                                                    |
| 4 | 54615545 | 54615802 | KD2-H4K8ac_peak_22461 | 4.01115  |                                                    |
| 4 | 54772140 | 54772564 | KD2-H4K8ac_peak_22462 | 4.211    |                                                    |
| 4 | 54930206 | 54930693 | KD2-H4K8ac_peak_22463 | 4.67342  | CHIC2_ENSG00000109220                              |
| 4 | 54957940 | 54958599 | KD2-H4K8ac_peak_22464 | 9.1707   |                                                    |
| 4 | 55062845 | 55063114 | KD2-H4K8ac_peak_22465 | 6.16888  |                                                    |
| 4 | 55063483 | 55063927 | KD2-H4K8ac_peak_22466 | 5.45396  |                                                    |
| 4 | 55093581 | 55093825 | KD2-H4K8ac_peak_22467 | 10.46264 |                                                    |
| 4 | 55094231 | 55094560 | KD2-H4K8ac_peak_22468 | 4.42765  | PDGFRA_ENSG00000134853                             |
| 4 | 55099718 | 55099981 | KD2-H4K8ac_peak_22469 | 6.76298  |                                                    |
| 4 | 55149275 | 55149595 | KD2-H4K8ac_peak_22470 | 5.73839  |                                                    |
| 4 | 55953566 | 55953879 | KD2-H4K8ac_peak_22471 | 7.47462  |                                                    |
| 4 | 56262307 | 56262729 | KD2-H4K8ac_peak_22472 | 11.75669 | SRD5A3-AS1_ENSG00000249700;TMEM165_ENSG00000134851 |
| 4 | 56411914 | 56412634 | KD2-H4K8ac_peak_22473 | 12.42761 | CLOCK_ENSG00000134852;RP11-528I4.2_ENSG00000272969 |
| 4 | 56412987 | 56413501 | KD2-H4K8ac_peak_22474 | 6.40297  | CLOCK_ENSG00000134852;RP11-528I4.2_ENSG00000272969 |
| 4 | 56502076 | 56502334 | KD2-H4K8ac_peak_22475 | 9.65086  | NMU_ENSG00000109255                                |
| 4 | 56502800 | 56503113 | KD2-H4K8ac_peak_22476 | 6.99815  | NMU_ENSG00000109255                                |
| 4 | 56719934 | 56720311 | KD2-H4K8ac_peak_22477 | 10.29344 | EXOC1_ENSG00000090989                              |
| 4 | 56815076 | 56815351 | KD2-H4K8ac_peak_22478 | 13.80019 | CEP135_ENSG00000174799                             |
| 4 | 56914807 | 56916139 | KD2-H4K8ac_peak_22479 | 23.55663 |                                                    |
| 4 | 57014454 | 57014717 | KD2-H4K8ac_peak_22480 | 7.27716  |                                                    |
| 4 | 57015063 | 57015473 | KD2-H4K8ac_peak_22481 | 5.49367  |                                                    |
| 4 | 57102037 | 57102234 | KD2-H4K8ac_peak_22482 | 5.93446  |                                                    |
| 4 | 57108697 | 57109032 | KD2-H4K8ac_peak_22483 | 12.36633 |                                                    |
| 4 | 57162700 | 57162898 | KD2-H4K8ac_peak_22484 | 5.51783  |                                                    |
| 4 | 57253394 | 57253885 | KD2-H4K8ac_peak_22485 | 11.75669 | AASDH_ENSG00000157426;RP11-646I6.5_ENSG00000269921 |
| 4 | 57411044 | 57411420 | KD2-H4K8ac_peak_22486 | 10.0746  |                                                    |
| 4 | 57737505 | 57738343 | KD2-H4K8ac_peak_22487 | 10.0692  |                                                    |
| 4 | 57774839 | 57775299 | KD2-H4K8ac_peak_22488 | 6.99815  | REST_ENSG00000084093                               |
| 4 | 57843238 | 57843609 | KD2-H4K8ac_peak_22489 | 5.32933  | POLR2B_ENSG00000047315                             |
| 4 | 57844163 | 57844658 | KD2-H4K8ac_peak_22490 | 9.37314  | NOA1_ENSG00000084092;POLR2B_ENSG00000047315        |
| 4 | 57922862 | 57923059 | KD2-H4K8ac_peak_22491 | 5.77029  |                                                    |
| 4 | 58023358 | 58023662 | KD2-H4K8ac_peak_22492 | 4.77079  |                                                    |

|   |          |          |                       |          |                                                           |
|---|----------|----------|-----------------------|----------|-----------------------------------------------------------|
| 4 | 58030003 | 58030591 | KD2-H4K8ac_peak_22493 | 7.67504  |                                                           |
| 4 | 60721817 | 60722095 | KD2-H4K8ac_peak_22494 | 5.25071  |                                                           |
| 4 | 66864203 | 66864927 | KD2-H4K8ac_peak_22495 | 14.74047 | RP11-25H12.1_ENSG00000249413                              |
| 4 | 69215976 | 69216432 | KD2-H4K8ac_peak_22496 | 5.14125  | YTHDC1_ENSG00000083896                                    |
| 4 | 71553107 | 71553845 | KD2-H4K8ac_peak_22497 | 16.49944 | UTP3_ENSG00000132467                                      |
| 4 | 71554311 | 71554711 | KD2-H4K8ac_peak_22498 | 4.86324  | UTP3_ENSG00000132467                                      |
| 4 | 71570106 | 71571539 | KD2-H4K8ac_peak_22499 | 7.76104  | RP11-46J23.1_ENSG00000272986;RUFY3_ENSG00000018189        |
| 4 | 71705173 | 71705593 | KD2-H4K8ac_peak_22500 | 20.8593  | GRSF1_ENSG00000132463                                     |
| 4 | 71767571 | 71767894 | KD2-H4K8ac_peak_22501 | 10.05606 | MOB1B_ENSG00000173542                                     |
| 4 | 71768184 | 71768607 | KD2-H4K8ac_peak_22502 | 11.1952  | MOB1B_ENSG00000173542                                     |
| 4 | 71858852 | 71859120 | KD2-H4K8ac_peak_22503 | 4.86324  | DCK_ENSG00000156136                                       |
| 4 | 71859374 | 71859861 | KD2-H4K8ac_peak_22504 | 9.20193  |                                                           |
| 4 | 72898096 | 72898440 | KD2-H4K8ac_peak_22505 | 5.25071  | NPF2FR2_ENSG00000056291                                   |
| 4 | 73177788 | 73178057 | KD2-H4K8ac_peak_22506 | 8.17902  |                                                           |
| 4 | 73284838 | 73285334 | KD2-H4K8ac_peak_22507 | 8.17902  |                                                           |
| 4 | 73292412 | 73292608 | KD2-H4K8ac_peak_22508 | 8.88549  |                                                           |
| 4 | 73434742 | 73435493 | KD2-H4K8ac_peak_22509 | 11.05407 | ADAMTS3_ENSG00000156140                                   |
| 4 | 73934954 | 73935433 | KD2-H4K8ac_peak_22510 | 14.63458 | COX18_ENSG00000163626                                     |
| 4 | 74123855 | 74124468 | KD2-H4K8ac_peak_22511 | 8.02571  | ANKRD17_ENSG00000132466;RP11-692D12.1_ENSG00000250220     |
| 4 | 74124683 | 74125246 | KD2-H4K8ac_peak_22512 | 9.63487  | ANKRD17_ENSG00000132466;RP11-692D12.1_ENSG00000250220     |
| 4 | 76439005 | 76439441 | KD2-H4K8ac_peak_22513 | 10.73467 | RCHY1_ENSG00000163743;THAP6_ENSG00000174796               |
| 4 | 76439703 | 76439940 | KD2-H4K8ac_peak_22514 | 14.66631 | RCHY1_ENSG00000163743;THAP6_ENSG00000174796               |
| 4 | 76555379 | 76555583 | KD2-H4K8ac_peak_22515 | 6.25869  | CDKL2_ENSG00000138769                                     |
| 4 | 76597959 | 76598528 | KD2-H4K8ac_peak_22516 | 13.80019 |                                                           |
| 4 | 76598847 | 76599359 | KD2-H4K8ac_peak_22517 | 5.88845  |                                                           |
| 4 | 76650067 | 76650531 | KD2-H4K8ac_peak_22518 | 10.96455 | G3BP2_ENSG00000138757;USO1_ENSG00000138768                |
| 4 | 76911647 | 76911877 | KD2-H4K8ac_peak_22519 | 6.66692  | SDAD1_ENSG00000198301                                     |
| 4 | 76912331 | 76912581 | KD2-H4K8ac_peak_22520 | 10.7186  | SDAD1_ENSG00000198301                                     |
| 4 | 77118352 | 77118709 | KD2-H4K8ac_peak_22521 | 6.56926  |                                                           |
| 4 | 77120849 | 77121256 | KD2-H4K8ac_peak_22522 | 6.31143  |                                                           |
| 4 | 77134497 | 77135768 | KD2-H4K8ac_peak_22523 | 18.70522 | SCARB2_ENSG00000138760;FAM47E_ENSG00000189157             |
| 4 | 77155165 | 77155863 | KD2-H4K8ac_peak_22524 | 9.72244  |                                                           |
| 4 | 77172602 | 77173498 | KD2-H4K8ac_peak_22525 | 12.84642 | FAM47E-STBD1_ENSG00000272414;FAM47E-STBD1_ENSG00000118804 |
| 4 | 77227295 | 77227633 | KD2-H4K8ac_peak_22526 | 6.52179  |                                                           |
| 4 | 77228183 | 77228471 | KD2-H4K8ac_peak_22527 | 7.73264  |                                                           |
| 4 | 77342078 | 77342716 | KD2-H4K8ac_peak_22528 | 11.92978 | CCDC158_ENSG00000163749                                   |
| 4 | 77501782 | 77502080 | KD2-H4K8ac_peak_22529 | 6.8836   |                                                           |
| 4 | 77504189 | 77504693 | KD2-H4K8ac_peak_22530 | 12.06346 |                                                           |
| 4 | 77610274 | 77611127 | KD2-H4K8ac_peak_22531 | 13.73635 |                                                           |
| 4 | 77870966 | 77871205 | KD2-H4K8ac_peak_22532 | 12.82393 | SEPT11_ENSG00000138758                                    |
| 4 | 77871579 | 77872028 | KD2-H4K8ac_peak_22533 | 7.76329  | SEPT11_ENSG00000138758                                    |
| 4 | 77996691 | 77996951 | KD2-H4K8ac_peak_22534 | 14.74047 | CCNI_ENSG00000118816                                      |
| 4 | 77997185 | 77997473 | KD2-H4K8ac_peak_22535 | 19.85702 | CCNI_ENSG00000118816                                      |
| 4 | 78078072 | 78078300 | KD2-H4K8ac_peak_22536 | 12.36441 | CCNG2_ENSG00000138764                                     |
| 4 | 78078594 | 78078955 | KD2-H4K8ac_peak_22537 | 6.84261  | CCNG2_ENSG00000138764                                     |
| 4 | 78740271 | 78741226 | KD2-H4K8ac_peak_22538 | 10.72656 | CNOT6L_ENSG00000138767                                    |

|   |          |          |                       |          |                                                      |
|---|----------|----------|-----------------------|----------|------------------------------------------------------|
| 4 | 78741606 | 78741841 | KD2-H4K8ac_peak_22539 | 6.13909  | CNOT6L_ENSG00000138767                               |
| 4 | 78976834 | 78978007 | KD2-H4K8ac_peak_22540 | 13.70753 | FRAS1_ENSG00000138759                                |
| 4 | 78980102 | 78980477 | KD2-H4K8ac_peak_22541 | 4.86324  |                                                      |
| 4 | 79126171 | 79126657 | KD2-H4K8ac_peak_22542 | 7.12754  |                                                      |
| 4 | 79472768 | 79473329 | KD2-H4K8ac_peak_22543 | 17.17257 | ANXA3_ENSG00000138772                                |
| 4 | 79696624 | 79697059 | KD2-H4K8ac_peak_22544 | 6.84261  | RP11-109G23.3_ENSG00000260278;BMP2K_ENSG00000138756  |
| 4 | 79697264 | 79697915 | KD2-H4K8ac_peak_22545 | 9.11031  | RP11-109G23.3_ENSG00000260278;BMP2K_ENSG00000138756  |
| 4 | 79860038 | 79860521 | KD2-H4K8ac_peak_22546 | 14.15075 | PAQR3_ENSG00000163291                                |
| 4 | 79971852 | 79972133 | KD2-H4K8ac_peak_22547 | 9.15329  |                                                      |
| 4 | 80993138 | 80994406 | KD2-H4K8ac_peak_22548 | 11.8457  |                                                      |
| 4 | 81117898 | 81118090 | KD2-H4K8ac_peak_22549 | 5.54647  |                                                      |
| 4 | 81187740 | 81188239 | KD2-H4K8ac_peak_22550 | 8.10216  | FGF5_ENSG00000138675                                 |
| 4 | 83294591 | 83295108 | KD2-H4K8ac_peak_22551 | 9.36516  | HNRNPD_ENSG00000138668;RP11-127B20.3_ENSG00000272677 |
| 4 | 83295511 | 83295794 | KD2-H4K8ac_peak_22552 | 14.8083  | HNRNPD_ENSG00000138668;RP11-127B20.3_ENSG00000272677 |
| 4 | 83350307 | 83350540 | KD2-H4K8ac_peak_22553 | 12.3187  | HNRNPDL_ENSG00000152795                              |
| 4 | 83350892 | 83351350 | KD2-H4K8ac_peak_22554 | 10.19949 | HNRNPDL_ENSG00000152795;ENOPH1_ENSG00000145293       |
| 4 | 83482851 | 83483436 | KD2-H4K8ac_peak_22555 | 9.96798  | TMEM150C_ENSG00000249242                             |
| 4 | 83651819 | 83652038 | KD2-H4K8ac_peak_22556 | 6.31143  |                                                      |
| 4 | 83812440 | 83812762 | KD2-H4K8ac_peak_22557 | 12.91654 |                                                      |
| 4 | 83934653 | 83934904 | KD2-H4K8ac_peak_22558 | 10.08874 | LIN54_ENSG00000189308                                |
| 4 | 83955525 | 83955834 | KD2-H4K8ac_peak_22559 | 8.1233   | COPS4_ENSG00000138663                                |
| 4 | 84205681 | 84205957 | KD2-H4K8ac_peak_22560 | 19.3524  | COQ2_ENSG00000173085                                 |
| 4 | 84376648 | 84376951 | KD2-H4K8ac_peak_22561 | 10.19949 | HELQ_ENSG00000163312;MRPS18C_ENSG00000163319         |
| 4 | 84405820 | 84406144 | KD2-H4K8ac_peak_22562 | 6.65673  |                                                      |
| 4 | 84406505 | 84406709 | KD2-H4K8ac_peak_22563 | 6.2781   |                                                      |
| 4 | 85886964 | 85888065 | KD2-H4K8ac_peak_22564 | 19.6416  | WDFY3_ENSG00000163625;WDFY3-AS2_ENSG00000180769      |
| 4 | 86396367 | 86396635 | KD2-H4K8ac_peak_22565 | 5.14125  | ARHGAP24_ENSG00000138639                             |
| 4 | 86941685 | 86941880 | KD2-H4K8ac_peak_22566 | 4.211    |                                                      |
| 4 | 87813334 | 87813672 | KD2-H4K8ac_peak_22567 | 6.08439  |                                                      |
| 4 | 87856320 | 87856573 | KD2-H4K8ac_peak_22568 | 5.9696   | C4orf36_ENSG00000163633;AFF1_ENSG00000172493         |
| 4 | 87927656 | 87928260 | KD2-H4K8ac_peak_22569 | 8.10216  |                                                      |
| 4 | 87989981 | 87990261 | KD2-H4K8ac_peak_22570 | 4.47369  |                                                      |
| 4 | 88133513 | 88133763 | KD2-H4K8ac_peak_22571 | 5.16439  |                                                      |
| 4 | 88141115 | 88141600 | KD2-H4K8ac_peak_22572 | 5.92591  |                                                      |
| 4 | 88311132 | 88311602 | KD2-H4K8ac_peak_22573 | 10.72656 | HSD17B11_ENSG00000198189                             |
| 4 | 88312580 | 88312986 | KD2-H4K8ac_peak_22574 | 6.8836   | HSD17B11_ENSG00000198189                             |
| 4 | 88343288 | 88343528 | KD2-H4K8ac_peak_22575 | 5.94405  | NUDT9_ENSG00000170502                                |
| 4 | 88441002 | 88441349 | KD2-H4K8ac_peak_22576 | 8.1233   |                                                      |
| 4 | 88928897 | 88929348 | KD2-H4K8ac_peak_22577 | 5.84991  | PKD2_ENSG00000118762                                 |
| 4 | 89204904 | 89205195 | KD2-H4K8ac_peak_22578 | 10.29344 | PPM1K_ENSG00000163644;RP11-10L7.1_ENSG00000246375    |
| 4 | 89300228 | 89300637 | KD2-H4K8ac_peak_22579 | 8.4716   | HERC6_ENSG00000138642                                |
| 4 | 89378410 | 89378943 | KD2-H4K8ac_peak_22580 | 5.30799  | HERC5_ENSG00000138646                                |
| 4 | 89444306 | 89445249 | KD2-H4K8ac_peak_22581 | 16.15695 | PYURF_ENSG00000145337                                |
| 4 | 89619216 | 89619430 | KD2-H4K8ac_peak_22582 | 4.86324  | NAP1L5_ENSG00000177432                               |
| 4 | 89744330 | 89744629 | KD2-H4K8ac_peak_22583 | 8.1233   |                                                      |
| 4 | 90228671 | 90229522 | KD2-H4K8ac_peak_22584 | 10.43145 | GPRIN3_ENSG00000185477                               |

|   |           |          |                       |          |                                                                                |
|---|-----------|----------|-----------------------|----------|--------------------------------------------------------------------------------|
| 4 | 90757994  | 90758866 | KD2-H4K8ac_peak_22585 | 13.57066 | SNCA_ENSG00000145335;RP11-67M1.1_ENSG00000247775                               |
| 4 | 91049040  | 91049592 | KD2-H4K8ac_peak_22586 | 11.04256 | CCSER1_ENSG00000184305                                                         |
| 4 | 93227069  | 93227359 | KD2-H4K8ac_peak_22587 | 6.07178  |                                                                                |
| 4 | 95127795  | 95128019 | KD2-H4K8ac_peak_22588 | 4.42765  | RP11-363G15.2_ENSG00000246541;SMARCAD1_ENSG00000163104                         |
| 4 | 95128783  | 95129817 | KD2-H4K8ac_peak_22589 | 13.57066 | RP11-363G15.2_ENSG00000246541;SMARCAD1_ENSG00000163104                         |
| 4 | 95569581  | 95570420 | KD2-H4K8ac_peak_22590 | 9.51625  |                                                                                |
| 4 | 95572201  | 95572503 | KD2-H4K8ac_peak_22591 | 5.57044  |                                                                                |
| 4 | 95573294  | 95573580 | KD2-H4K8ac_peak_22592 | 9.15329  |                                                                                |
| 4 | 95575439  | 95576020 | KD2-H4K8ac_peak_22593 | 6.40683  |                                                                                |
| 4 | 95601177  | 95601560 | KD2-H4K8ac_peak_22594 | 7.83489  |                                                                                |
| 4 | 95678542  | 95680540 | KD2-H4K8ac_peak_22595 | 32.24865 | RP11-168E14.1_ENSG00000249599;BMPR1B_ENSG00000138696                           |
| 4 | 95681644  | 95681892 | KD2-H4K8ac_peak_22596 | 7.59643  |                                                                                |
| 4 | 95736254  | 95736494 | KD2-H4K8ac_peak_22597 | 5.01262  |                                                                                |
| 4 | 95746301  | 95746533 | KD2-H4K8ac_peak_22598 | 9.11818  |                                                                                |
| 4 | 95972562  | 95972759 | KD2-H4K8ac_peak_22599 | 9.15329  |                                                                                |
| 4 | 95980186  | 95980422 | KD2-H4K8ac_peak_22600 | 10.0746  |                                                                                |
| 4 | 95983011  | 95983225 | KD2-H4K8ac_peak_22601 | 8.17902  |                                                                                |
| 4 | 96115071  | 96115301 | KD2-H4K8ac_peak_22602 | 6.90458  |                                                                                |
| 4 | 96435844  | 96436093 | KD2-H4K8ac_peak_22603 | 4.42765  |                                                                                |
| 4 | 96441772  | 96442213 | KD2-H4K8ac_peak_22604 | 12.42547 |                                                                                |
| 4 | 96442482  | 96442899 | KD2-H4K8ac_peak_22605 | 6.16888  |                                                                                |
| 4 | 96444218  | 96444491 | KD2-H4K8ac_peak_22606 | 10.0692  |                                                                                |
| 4 | 96456654  | 96456852 | KD2-H4K8ac_peak_22607 | 4.42765  |                                                                                |
| 4 | 96457327  | 96457543 | KD2-H4K8ac_peak_22608 | 10.21502 |                                                                                |
| 4 | 96468383  | 96469518 | KD2-H4K8ac_peak_22609 | 16.11042 | UNC5C_ENSG00000182168;RP11-710C12.1_ENSG00000271474                            |
| 4 | 96469726  | 96470014 | KD2-H4K8ac_peak_22610 | 12.08081 | UNC5C_ENSG00000182168;RP11-710C12.1_ENSG00000271474                            |
| 4 | 96470466  | 96471063 | KD2-H4K8ac_peak_22611 | 12.08081 | UNC5C_ENSG00000182168;RP11-710C12.1_ENSG00000271474                            |
| 4 | 99063889  | 99064456 | KD2-H4K8ac_peak_22612 | 4.67342  | STPG2_ENSG00000163116                                                          |
| 4 | 99181379  | 99182256 | KD2-H4K8ac_peak_22613 | 9.95119  | RP11-323J4.1_ENSG00000214559;RAP1GDS1_ENSG00000138698                          |
| 4 | 99182654  | 99183109 | KD2-H4K8ac_peak_22614 | 9.59147  | RP11-323J4.1_ENSG00000214559;RAP1GDS1_ENSG00000138698                          |
| 4 | 99580069  | 99580276 | KD2-H4K8ac_peak_22615 | 7.36799  | TSPAN5_ENSG00000168785;RP11-1299A16.3_ENSG00000260641                          |
| 4 | 99849622  | 99850217 | KD2-H4K8ac_peak_22616 | 10.43145 | RP11-571L19.7_ENSG00000263923;AC019131.1_ENSG00000238449                       |
| 4 | 99850579  | 99851215 | KD2-H4K8ac_peak_22617 | 4.7849   | EIF4E_ENSG00000151247;RP11-571L19.7_ENSG00000263923;AC019131.1_ENSG00000238449 |
| 4 | 99916907  | 99917423 | KD2-H4K8ac_peak_22618 | 9.24683  | METAP1_ENSG00000164024                                                         |
| 4 | 100010198 | 1E+08    | KD2-H4K8ac_peak_22619 | 9.15329  | ADH5_ENSG00000197894;RP11-696N14.1_ENSG00000246090                             |
| 4 | 100484009 | 1E+08    | KD2-H4K8ac_peak_22620 | 10.53377 | TRMT10A_ENSG00000145331;MTTP_ENSG00000138823                                   |
| 4 | 100484942 | 1E+08    | KD2-H4K8ac_peak_22621 | 18.91876 | TRMT10A_ENSG00000145331;MTTP_ENSG00000138823                                   |
| 4 | 100765034 | 1.01E+08 | KD2-H4K8ac_peak_22622 | 6.16888  |                                                                                |
| 4 | 100772115 | 1.01E+08 | KD2-H4K8ac_peak_22623 | 8.1233   |                                                                                |
| 4 | 100815197 | 1.01E+08 | KD2-H4K8ac_peak_22624 | 8.85813  | LAMTOR3_ENSG00000109270                                                        |
| 4 | 100815911 | 1.01E+08 | KD2-H4K8ac_peak_22625 | 7.40111  | LAMTOR3_ENSG00000109270                                                        |
| 4 | 100867392 | 1.01E+08 | KD2-H4K8ac_peak_22626 | 6.99815  | DNAJB14_ENSG00000164031                                                        |
| 4 | 100870422 | 1.01E+08 | KD2-H4K8ac_peak_22627 | 14.15075 | H2AFZ_ENSG00000164032;RP11-15B17.1_ENSG00000245322                             |
| 4 | 102963606 | 1.03E+08 | KD2-H4K8ac_peak_22628 | 5.16439  |                                                                                |
| 4 | 103089884 | 1.03E+08 | KD2-H4K8ac_peak_22629 | 3.75035  |                                                                                |
| 4 | 103265714 | 1.03E+08 | KD2-H4K8ac_peak_22630 | 6.99815  |                                                                                |



|   |           |          |                       |          |                                                       |
|---|-----------|----------|-----------------------|----------|-------------------------------------------------------|
| 4 | 103352177 | 1.03E+08 | KD2-H4K8ac_peak_22631 | 13.57066 | SLC39A8_ENSG00000138821                               |
| 4 | 103422108 | 1.03E+08 | KD2-H4K8ac_peak_22632 | 15.40891 | AF213884.2_ENSG00000260651;NFKB1_ENSG00000109320      |
| 4 | 103748171 | 1.04E+08 | KD2-H4K8ac_peak_22633 | 19.87796 | RP11-10L12.4_ENSG00000246560                          |
| 4 | 103997475 | 1.04E+08 | KD2-H4K8ac_peak_22634 | 13.50024 |                                                       |
| 4 | 104119727 | 1.04E+08 | KD2-H4K8ac_peak_22635 | 6.16888  | CENPE_ENSG00000138778                                 |
| 4 | 105411940 | 1.05E+08 | KD2-H4K8ac_peak_22636 | 5.25071  | AC093628.1_ENSG00000272082;AC004053.1_ENSG00000245384 |
| 4 | 105412687 | 1.05E+08 | KD2-H4K8ac_peak_22637 | 26.19661 | AC093628.1_ENSG00000272082;AC004053.1_ENSG00000245384 |
| 4 | 105415943 | 1.05E+08 | KD2-H4K8ac_peak_22638 | 4.42765  | CXXC4_ENSG00000168772                                 |
| 4 | 106067518 | 1.06E+08 | KD2-H4K8ac_peak_22639 | 13.34404 | TET2_ENSG00000168769                                  |
| 4 | 106394661 | 1.06E+08 | KD2-H4K8ac_peak_22640 | 7.07117  | PPA2_ENSG00000138777                                  |
| 4 | 106629525 | 1.07E+08 | KD2-H4K8ac_peak_22641 | 12.06346 | GSTCD_ENSG00000138780                                 |
| 4 | 106630029 | 1.07E+08 | KD2-H4K8ac_peak_22642 | 4.42765  | GSTCD_ENSG00000138780                                 |
| 4 | 107236771 | 1.07E+08 | KD2-H4K8ac_peak_22643 | 7.76329  | AIMP1_ENSG00000164022                                 |
| 4 | 107237648 | 1.07E+08 | KD2-H4K8ac_peak_22644 | 4.77079  | AIMP1_ENSG00000164022                                 |
| 4 | 107446556 | 1.07E+08 | KD2-H4K8ac_peak_22645 | 11.89502 |                                                       |
| 4 | 107956486 | 1.08E+08 | KD2-H4K8ac_peak_22646 | 6.40683  |                                                       |
| 4 | 108132712 | 1.08E+08 | KD2-H4K8ac_peak_22647 | 7.27716  |                                                       |
| 4 | 108134160 | 1.08E+08 | KD2-H4K8ac_peak_22648 | 8.1233   |                                                       |
| 4 | 108179408 | 1.08E+08 | KD2-H4K8ac_peak_22649 | 5.25071  | RP11-713M6.2_ENSG00000251081                          |
| 4 | 108299479 | 1.08E+08 | KD2-H4K8ac_peak_22650 | 3.75035  |                                                       |
| 4 | 108641121 | 1.09E+08 | KD2-H4K8ac_peak_22651 | 8.30974  | PAPSS1_ENSG00000138801                                |
| 4 | 108642755 | 1.09E+08 | KD2-H4K8ac_peak_22652 | 6.64891  |                                                       |
| 4 | 108852067 | 1.09E+08 | KD2-H4K8ac_peak_22653 | 5.30799  | CYP2U1_ENSG00000155016                                |
| 4 | 108852777 | 1.09E+08 | KD2-H4K8ac_peak_22654 | 3.86308  | CYP2U1_ENSG00000155016                                |
| 4 | 108911084 | 1.09E+08 | KD2-H4K8ac_peak_22655 | 11.15509 | HADH_ENSG00000138796                                  |
| 4 | 109093671 | 1.09E+08 | KD2-H4K8ac_peak_22656 | 13.70753 |                                                       |
| 4 | 109541853 | 1.1E+08  | KD2-H4K8ac_peak_22657 | 6.65673  | RPL34-AS1_ENSG00000234492;RPL34_ENSG00000109475       |
| 4 | 110354417 | 1.1E+08  | KD2-H4K8ac_peak_22658 | 12.17278 | SEC24B-AS1_ENSG00000247950;SEC24B_ENSG00000138802     |
| 4 | 110480809 | 1.1E+08  | KD2-H4K8ac_peak_22659 | 9.20193  | CCDC109B_ENSG00000005059                              |
| 4 | 110623577 | 1.11E+08 | KD2-H4K8ac_peak_22660 | 8.98477  | CASP6_ENSG00000138794                                 |
| 4 | 110624379 | 1.11E+08 | KD2-H4K8ac_peak_22661 | 6.84261  | CASP6_ENSG00000138794                                 |
| 4 | 110650719 | 1.11E+08 | KD2-H4K8ac_peak_22662 | 11.70505 | PLA2G12A_ENSG00000123739                              |
| 4 | 110735550 | 1.11E+08 | KD2-H4K8ac_peak_22663 | 10.21502 | RP11-602N24.3_ENSG00000272795;GAR1_ENSG00000109534    |
| 4 | 110737109 | 1.11E+08 | KD2-H4K8ac_peak_22664 | 5.43522  | RP11-602N24.3_ENSG00000272795;GAR1_ENSG00000109534    |
| 4 | 111114523 | 1.11E+08 | KD2-H4K8ac_peak_22665 | 6.57893  |                                                       |
| 4 | 111117154 | 1.11E+08 | KD2-H4K8ac_peak_22666 | 8.85813  |                                                       |
| 4 | 111119822 | 1.11E+08 | KD2-H4K8ac_peak_22667 | 4.67342  | ELOVL6_ENSG00000170522                                |
| 4 | 111120796 | 1.11E+08 | KD2-H4K8ac_peak_22668 | 6.0073   | ELOVL6_ENSG00000170522                                |
| 4 | 113152190 | 1.13E+08 | KD2-H4K8ac_peak_22669 | 7.95563  | RP11-73K9.2_ENSG00000260526;APIAR_ENSG00000138660     |
| 4 | 113153035 | 1.13E+08 | KD2-H4K8ac_peak_22670 | 7.40314  | RP11-73K9.2_ENSG00000260526;APIAR_ENSG00000138660     |
| 4 | 113206845 | 1.13E+08 | KD2-H4K8ac_peak_22671 | 6.0605   | TIFA_ENSG00000145365;ALPK1_ENSG00000073331            |
| 4 | 113247014 | 1.13E+08 | KD2-H4K8ac_peak_22672 | 5.88845  |                                                       |
| 4 | 113269501 | 1.13E+08 | KD2-H4K8ac_peak_22673 | 4.77079  |                                                       |
| 4 | 113298926 | 1.13E+08 | KD2-H4K8ac_peak_22674 | 6.56926  |                                                       |
| 4 | 113430961 | 1.13E+08 | KD2-H4K8ac_peak_22675 | 11.50346 |                                                       |
| 4 | 113435665 | 1.13E+08 | KD2-H4K8ac_peak_22676 | 5.30799  | NEUROG2_ENSG00000178403;RP11-402J6.1_ENSG00000249509  |

|   |           |          |                       |          |                                                      |
|---|-----------|----------|-----------------------|----------|------------------------------------------------------|
| 4 | 113436774 | 1.13E+08 | KD2-H4K8ac_peak_22677 | 5.75757  | NEUROG2_ENSG00000178403;RP11-402J6.1_ENSG00000249509 |
| 4 | 113438195 | 1.13E+08 | KD2-H4K8ac_peak_22678 | 4.67342  | NEUROG2_ENSG00000178403                              |
| 4 | 113441871 | 1.13E+08 | KD2-H4K8ac_peak_22679 | 10.96455 |                                                      |
| 4 | 113443033 | 1.13E+08 | KD2-H4K8ac_peak_22680 | 5.15777  |                                                      |
| 4 | 113451543 | 1.13E+08 | KD2-H4K8ac_peak_22681 | 6.66692  | RP11-402J6.2_ENSG00000248439                         |
| 4 | 113454820 | 1.13E+08 | KD2-H4K8ac_peak_22682 | 4.42765  |                                                      |
| 4 | 113478606 | 1.13E+08 | KD2-H4K8ac_peak_22683 | 6.16888  |                                                      |
| 4 | 113483144 | 1.13E+08 | KD2-H4K8ac_peak_22684 | 8.30974  |                                                      |
| 4 | 113626735 | 1.14E+08 | KD2-H4K8ac_peak_22685 | 11.30637 | RP11-148B6.2_ENSG00000250046                         |
| 4 | 113627294 | 1.14E+08 | KD2-H4K8ac_peak_22686 | 10.21502 | RP11-148B6.2_ENSG00000250046                         |
| 4 | 113629164 | 1.14E+08 | KD2-H4K8ac_peak_22687 | 8.17902  |                                                      |
| 4 | 113817043 | 1.14E+08 | KD2-H4K8ac_peak_22688 | 3.75035  |                                                      |
| 4 | 113817770 | 1.14E+08 | KD2-H4K8ac_peak_22689 | 9.59147  |                                                      |
| 4 | 113833024 | 1.14E+08 | KD2-H4K8ac_peak_22690 | 7.22457  |                                                      |
| 4 | 113866671 | 1.14E+08 | KD2-H4K8ac_peak_22691 | 9.11031  |                                                      |
| 4 | 113893890 | 1.14E+08 | KD2-H4K8ac_peak_22692 | 6.16888  |                                                      |
| 4 | 113897392 | 1.14E+08 | KD2-H4K8ac_peak_22693 | 6.94255  |                                                      |
| 4 | 114006307 | 1.14E+08 | KD2-H4K8ac_peak_22694 | 4.8402   |                                                      |
| 4 | 114683194 | 1.15E+08 | KD2-H4K8ac_peak_22695 | 13.81781 | CAMK2D_ENSG00000145349                               |
| 4 | 114900524 | 1.15E+08 | KD2-H4K8ac_peak_22696 | 4.8888   | AR SJ_ENSG00000180801                                |
| 4 | 118954436 | 1.19E+08 | KD2-H4K8ac_peak_22697 | 11.24702 | NDST3_ENSG00000164100                                |
| 4 | 119186484 | 1.19E+08 | KD2-H4K8ac_peak_22698 | 6.05809  |                                                      |
| 4 | 119199411 | 1.19E+08 | KD2-H4K8ac_peak_22699 | 7.27716  | SNHG8_ENSG00000269893                                |
| 4 | 119199977 | 1.19E+08 | KD2-H4K8ac_peak_22700 | 8.09113  | SNHG8_ENSG00000269893                                |
| 4 | 119231913 | 1.19E+08 | KD2-H4K8ac_peak_22701 | 6.07178  |                                                      |
| 4 | 119249984 | 1.19E+08 | KD2-H4K8ac_peak_22702 | 5.75757  |                                                      |
| 4 | 119258562 | 1.19E+08 | KD2-H4K8ac_peak_22703 | 9.02371  |                                                      |
| 4 | 119268797 | 1.19E+08 | KD2-H4K8ac_peak_22704 | 7.05877  |                                                      |
| 4 | 119273268 | 1.19E+08 | KD2-H4K8ac_peak_22705 | 7.49599  | PRSS12_ENSG00000164099                               |
| 4 | 119274093 | 1.19E+08 | KD2-H4K8ac_peak_22706 | 5.13615  | PRSS12_ENSG00000164099                               |
| 4 | 119274642 | 1.19E+08 | KD2-H4K8ac_peak_22707 | 8.37231  | PRSS12_ENSG00000164099                               |
| 4 | 119319128 | 1.19E+08 | KD2-H4K8ac_peak_22708 | 6.79289  |                                                      |
| 4 | 119321579 | 1.19E+08 | KD2-H4K8ac_peak_22709 | 6.16888  | NDUFS5P5_ENSG00000230671                             |
| 4 | 119512951 | 1.2E+08  | KD2-H4K8ac_peak_22710 | 9.59147  | RP11-384K6.6_ENSG00000260404                         |
| 4 | 119592763 | 1.2E+08  | KD2-H4K8ac_peak_22711 | 9.11031  |                                                      |
| 4 | 119593252 | 1.2E+08  | KD2-H4K8ac_peak_22712 | 4.77079  |                                                      |
| 4 | 119604729 | 1.2E+08  | KD2-H4K8ac_peak_22713 | 7.22457  |                                                      |
| 4 | 119606071 | 1.2E+08  | KD2-H4K8ac_peak_22714 | 6.8836   | METTL14_ENSG00000145388                              |
| 4 | 119690891 | 1.2E+08  | KD2-H4K8ac_peak_22715 | 7.12754  |                                                      |
| 4 | 119693759 | 1.2E+08  | KD2-H4K8ac_peak_22716 | 7.27716  |                                                      |
| 4 | 119727625 | 1.2E+08  | KD2-H4K8ac_peak_22717 | 6.27931  |                                                      |
| 4 | 119756955 | 1.2E+08  | KD2-H4K8ac_peak_22718 | 7.07117  |                                                      |
| 4 | 119786136 | 1.2E+08  | KD2-H4K8ac_peak_22719 | 19.6416  |                                                      |
| 4 | 119802681 | 1.2E+08  | KD2-H4K8ac_peak_22720 | 6.31143  |                                                      |
| 4 | 119804904 | 1.2E+08  | KD2-H4K8ac_peak_22721 | 6.16888  |                                                      |
| 4 | 119831304 | 1.2E+08  | KD2-H4K8ac_peak_22722 | 6.16888  |                                                      |

|   |           |          |                       |          |                                                     |
|---|-----------|----------|-----------------------|----------|-----------------------------------------------------|
| 4 | 120133926 | 1.2E+08  | KD2-H4K8ac_peak_22723 | 6.20982  | RP11-455G16.1_ENSG00000178636;USP53_ENSG00000145390 |
| 4 | 120222178 | 1.2E+08  | KD2-H4K8ac_peak_22724 | 6.65673  |                                                     |
| 4 | 120549850 | 1.21E+08 | KD2-H4K8ac_peak_22725 | 6.0073   | PDE5A_ENSG00000138735                               |
| 4 | 120817369 | 1.21E+08 | KD2-H4K8ac_peak_22726 | 7.12754  |                                                     |
| 4 | 120970943 | 1.21E+08 | KD2-H4K8ac_peak_22727 | 7.59643  |                                                     |
| 4 | 121843389 | 1.22E+08 | KD2-H4K8ac_peak_22728 | 15.58442 | PRDM5_ENSG00000138738                               |
| 4 | 121992619 | 1.22E+08 | KD2-H4K8ac_peak_22729 | 3.97079  | NDNF_ENSG00000173376;RP11-647P12.1_ENSG00000250344  |
| 4 | 121993983 | 1.22E+08 | KD2-H4K8ac_peak_22730 | 8.17902  | NDNF_ENSG00000173376                                |
| 4 | 122744306 | 1.23E+08 | KD2-H4K8ac_peak_22731 | 6.8836   | CCNA2_ENSG00000145386                               |
| 4 | 122791164 | 1.23E+08 | KD2-H4K8ac_peak_22732 | 9.402    | BBS7_ENSG00000138686;RP11-63B13.1_ENSG00000261501   |
| 4 | 123747862 | 1.24E+08 | KD2-H4K8ac_peak_22733 | 9.36516  | FGF2_ENSG00000138685;AC021205.1_ENSG00000253069     |
| 4 | 124666184 | 1.25E+08 | KD2-H4K8ac_peak_22734 | 5.25071  | RPL21P50_ENSG00000228489;AC096732.2_ENSG00000226655 |
| 4 | 125633084 | 1.26E+08 | KD2-H4K8ac_peak_22735 | 13.9234  | ANKRD50_ENSG00000151458                             |
| 4 | 127490365 | 1.27E+08 | KD2-H4K8ac_peak_22736 | 10.21502 |                                                     |
| 4 | 128543890 | 1.29E+08 | KD2-H4K8ac_peak_22737 | 16.23438 | INTU_ENSG00000164066                                |
| 4 | 128554153 | 1.29E+08 | KD2-H4K8ac_peak_22738 | 5.57044  |                                                     |
| 4 | 128702897 | 1.29E+08 | KD2-H4K8ac_peak_22739 | 13.3695  | HSPA4L_ENSG00000164070                              |
| 4 | 128885774 | 1.29E+08 | KD2-H4K8ac_peak_22740 | 5.1707   | C4orf29_ENSG00000164074                             |
| 4 | 128886584 | 1.29E+08 | KD2-H4K8ac_peak_22741 | 11.2938  | MFSD8_ENSG00000164073;C4orf29_ENSG00000164074       |
| 4 | 128981755 | 1.29E+08 | KD2-H4K8ac_peak_22742 | 28.92332 | LARP1B_ENSG00000138709                              |
| 4 | 128982524 | 1.29E+08 | KD2-H4K8ac_peak_22743 | 5.9696   | LARP1B_ENSG00000138709                              |
| 4 | 129209248 | 1.29E+08 | KD2-H4K8ac_peak_22744 | 8.26945  | PGRMC2_ENSG00000164040                              |
| 4 | 129308551 | 1.29E+08 | KD2-H4K8ac_peak_22745 | 5.45396  |                                                     |
| 4 | 129474321 | 1.29E+08 | KD2-H4K8ac_peak_22746 | 18.5703  | RP11-130C6.1_ENSG00000273077                        |
| 4 | 129522215 | 1.3E+08  | KD2-H4K8ac_peak_22747 | 12.06346 | RP11-184M15.2_ENSG00000248802                       |
| 4 | 129730953 | 1.3E+08  | KD2-H4K8ac_peak_22748 | 7.70289  | JADE1_ENSG00000077684                               |
| 4 | 129732506 | 1.3E+08  | KD2-H4K8ac_peak_22749 | 12.14909 |                                                     |
| 4 | 129733446 | 1.3E+08  | KD2-H4K8ac_peak_22750 | 8.10216  |                                                     |
| 4 | 130065931 | 1.3E+08  | KD2-H4K8ac_peak_22751 | 9.02371  |                                                     |
| 4 | 133265266 | 1.33E+08 | KD2-H4K8ac_peak_22752 | 5.57044  |                                                     |
| 4 | 133266292 | 1.33E+08 | KD2-H4K8ac_peak_22753 | 7.12754  |                                                     |
| 4 | 135122609 | 1.35E+08 | KD2-H4K8ac_peak_22754 | 5.25071  | PABPC4L_ENSG00000254535                             |
| 4 | 137316437 | 1.37E+08 | KD2-H4K8ac_peak_22755 | 7.01964  | RP11-775H9.2_ENSG00000251567                        |
| 4 | 138310082 | 1.38E+08 | KD2-H4K8ac_peak_22756 | 7.12754  |                                                     |
| 4 | 138529218 | 1.39E+08 | KD2-H4K8ac_peak_22757 | 8.1233   |                                                     |
| 4 | 139812943 | 1.4E+08  | KD2-H4K8ac_peak_22758 | 6.16888  |                                                     |
| 4 | 139832385 | 1.4E+08  | KD2-H4K8ac_peak_22759 | 7.95563  |                                                     |
| 4 | 139836414 | 1.4E+08  | KD2-H4K8ac_peak_22760 | 11.42902 |                                                     |
| 4 | 140004588 | 1.4E+08  | KD2-H4K8ac_peak_22761 | 9.16531  |                                                     |
| 4 | 140099764 | 1.4E+08  | KD2-H4K8ac_peak_22762 | 7.45501  |                                                     |
| 4 | 140223161 | 1.4E+08  | KD2-H4K8ac_peak_22763 | 8.79106  | NDUFC1_ENSG00000109390;NAA15_ENSG00000164134        |
| 4 | 140374445 | 1.4E+08  | KD2-H4K8ac_peak_22764 | 28.29986 | RP11-83A24.2_ENSG00000273247;RAB33B_ENSG00000172007 |
| 4 | 140476643 | 1.4E+08  | KD2-H4K8ac_peak_22765 | 13.70605 | RP11-342I1.2_ENSG00000272717                        |
| 4 | 140654650 | 1.41E+08 | KD2-H4K8ac_peak_22766 | 5.23279  |                                                     |
| 4 | 140656643 | 1.41E+08 | KD2-H4K8ac_peak_22767 | 18.94636 |                                                     |
| 4 | 140659166 | 1.41E+08 | KD2-H4K8ac_peak_22768 | 4.89359  |                                                     |

|   |           |          |                       |          |                       |
|---|-----------|----------|-----------------------|----------|-----------------------|
| 4 | 140661322 | 1.41E+08 | KD2-H4K8ac_peak_22769 | 6.65673  |                       |
| 4 | 140661911 | 1.41E+08 | KD2-H4K8ac_peak_22770 | 14.66631 |                       |
| 4 | 140697621 | 1.41E+08 | KD2-H4K8ac_peak_22771 | 5.88845  |                       |
| 4 | 140699580 | 1.41E+08 | KD2-H4K8ac_peak_22772 | 4.42765  |                       |
| 4 | 140701848 | 1.41E+08 | KD2-H4K8ac_peak_22773 | 8.98093  |                       |
| 4 | 140703647 | 1.41E+08 | KD2-H4K8ac_peak_22774 | 8.16133  |                       |
| 4 | 140704519 | 1.41E+08 | KD2-H4K8ac_peak_22775 | 5.88845  |                       |
| 4 | 140707852 | 1.41E+08 | KD2-H4K8ac_peak_22776 | 9.1707   |                       |
| 4 | 140735469 | 1.41E+08 | KD2-H4K8ac_peak_22777 | 7.79898  |                       |
| 4 | 140737238 | 1.41E+08 | KD2-H4K8ac_peak_22778 | 8.79557  |                       |
| 4 | 140746287 | 1.41E+08 | KD2-H4K8ac_peak_22779 | 6.44277  |                       |
| 4 | 140754277 | 1.41E+08 | KD2-H4K8ac_peak_22780 | 3.97079  |                       |
| 4 | 140760464 | 1.41E+08 | KD2-H4K8ac_peak_22781 | 4.66652  |                       |
| 4 | 140766164 | 1.41E+08 | KD2-H4K8ac_peak_22782 | 6.31143  |                       |
| 4 | 140784672 | 1.41E+08 | KD2-H4K8ac_peak_22783 | 4.77079  |                       |
| 4 | 140786967 | 1.41E+08 | KD2-H4K8ac_peak_22784 | 12.00597 |                       |
| 4 | 140788945 | 1.41E+08 | KD2-H4K8ac_peak_22785 | 7.22457  |                       |
| 4 | 140797704 | 1.41E+08 | KD2-H4K8ac_peak_22786 | 4.42765  |                       |
| 4 | 140800928 | 1.41E+08 | KD2-H4K8ac_peak_22787 | 5.57044  |                       |
| 4 | 140809282 | 1.41E+08 | KD2-H4K8ac_peak_22788 | 6.47635  |                       |
| 4 | 140810164 | 1.41E+08 | KD2-H4K8ac_peak_22789 | 4.211    |                       |
| 4 | 140811398 | 1.41E+08 | KD2-H4K8ac_peak_22790 | 8.55271  |                       |
| 4 | 140841718 | 1.41E+08 | KD2-H4K8ac_peak_22791 | 6.9809   |                       |
| 4 | 140842909 | 1.41E+08 | KD2-H4K8ac_peak_22792 | 5.835    |                       |
| 4 | 140846114 | 1.41E+08 | KD2-H4K8ac_peak_22793 | 6.16888  |                       |
| 4 | 140850250 | 1.41E+08 | KD2-H4K8ac_peak_22794 | 6.03693  |                       |
| 4 | 140854057 | 1.41E+08 | KD2-H4K8ac_peak_22795 | 8.66387  |                       |
| 4 | 140857677 | 1.41E+08 | KD2-H4K8ac_peak_22796 | 6.40683  |                       |
| 4 | 140862969 | 1.41E+08 | KD2-H4K8ac_peak_22797 | 9.11031  |                       |
| 4 | 140864423 | 1.41E+08 | KD2-H4K8ac_peak_22798 | 8.1233   |                       |
| 4 | 140876938 | 1.41E+08 | KD2-H4K8ac_peak_22799 | 7.45501  |                       |
| 4 | 140925461 | 1.41E+08 | KD2-H4K8ac_peak_22800 | 9.11031  |                       |
| 4 | 140926161 | 1.41E+08 | KD2-H4K8ac_peak_22801 | 5.6755   |                       |
| 4 | 140974468 | 1.41E+08 | KD2-H4K8ac_peak_22802 | 6.47635  |                       |
| 4 | 141016676 | 1.41E+08 | KD2-H4K8ac_peak_22803 | 5.88845  |                       |
| 4 | 141056168 | 1.41E+08 | KD2-H4K8ac_peak_22804 | 4.77079  |                       |
| 4 | 141056979 | 1.41E+08 | KD2-H4K8ac_peak_22805 | 7.27716  |                       |
| 4 | 141071889 | 1.41E+08 | KD2-H4K8ac_peak_22806 | 23.43329 |                       |
| 4 | 141073153 | 1.41E+08 | KD2-H4K8ac_peak_22807 | 3.86308  |                       |
| 4 | 141073880 | 1.41E+08 | KD2-H4K8ac_peak_22808 | 6.40297  |                       |
| 4 | 141075436 | 1.41E+08 | KD2-H4K8ac_peak_22809 | 13.09607 | MAML3_ENSG00000196782 |
| 4 | 141157724 | 1.41E+08 | KD2-H4K8ac_peak_22810 | 7.27716  |                       |
| 4 | 141159093 | 1.41E+08 | KD2-H4K8ac_peak_22811 | 13.80019 |                       |
| 4 | 141160683 | 1.41E+08 | KD2-H4K8ac_peak_22812 | 6.56926  |                       |
| 4 | 141164090 | 1.41E+08 | KD2-H4K8ac_peak_22813 | 6.66692  |                       |
| 4 | 141173150 | 1.41E+08 | KD2-H4K8ac_peak_22814 | 18.40451 |                       |

|   |           |          |                       |          |                                                        |
|---|-----------|----------|-----------------------|----------|--------------------------------------------------------|
| 4 | 141294018 | 1.41E+08 | KD2-H4K8ac_peak_22815 | 7.01964  | RP11-425I13.3_ENSG00000196951                          |
| 4 | 141294833 | 1.41E+08 | KD2-H4K8ac_peak_22816 | 10.65724 | RP11-425I13.3_ENSG00000196951                          |
| 4 | 141348096 | 1.41E+08 | KD2-H4K8ac_peak_22817 | 9.73431  | CLGN_ENSG00000153132                                   |
| 4 | 141444827 | 1.41E+08 | KD2-H4K8ac_peak_22818 | 7.27716  | ELMOD2_ENSG00000179387                                 |
| 4 | 141445355 | 1.41E+08 | KD2-H4K8ac_peak_22819 | 12.57143 | ELMOD2_ENSG00000179387                                 |
| 4 | 141489786 | 1.41E+08 | KD2-H4K8ac_peak_22820 | 5.54647  | UCP1_ENSG00000109424                                   |
| 4 | 141530787 | 1.42E+08 | KD2-H4K8ac_peak_22821 | 11.30637 |                                                        |
| 4 | 141609453 | 1.42E+08 | KD2-H4K8ac_peak_22822 | 7.47462  |                                                        |
| 4 | 141677271 | 1.42E+08 | KD2-H4K8ac_peak_22823 | 8.3261   | TBC1D9_ENSG00000109436;RP11-102N12.3_ENSG00000273472   |
| 4 | 141823935 | 1.42E+08 | KD2-H4K8ac_peak_22824 | 4.42765  |                                                        |
| 4 | 141846722 | 1.42E+08 | KD2-H4K8ac_peak_22825 | 7.70289  |                                                        |
| 4 | 141855246 | 1.42E+08 | KD2-H4K8ac_peak_22826 | 10.68173 |                                                        |
| 4 | 142053408 | 1.42E+08 | KD2-H4K8ac_peak_22827 | 5.13615  |                                                        |
| 4 | 142054165 | 1.42E+08 | KD2-H4K8ac_peak_22828 | 7.76329  |                                                        |
| 4 | 142141475 | 1.42E+08 | KD2-H4K8ac_peak_22829 | 4.06758  | ZNF330_ENSG00000109445                                 |
| 4 | 142557464 | 1.43E+08 | KD2-H4K8ac_peak_22830 | 7.47462  | IL15_ENSG00000164136                                   |
| 4 | 143043303 | 1.43E+08 | KD2-H4K8ac_peak_22831 | 5.57044  |                                                        |
| 4 | 144106118 | 1.44E+08 | KD2-H4K8ac_peak_22832 | 9.402    | RP11-284M14.1_ENSG00000250326;USP38_ENSG00000170185    |
| 4 | 144256725 | 1.44E+08 | KD2-H4K8ac_peak_22833 | 14.275   | GAB1_ENSG00000109458                                   |
| 4 | 144257393 | 1.44E+08 | KD2-H4K8ac_peak_22834 | 8.53092  | GAB1_ENSG00000109458                                   |
| 4 | 144434605 | 1.44E+08 | KD2-H4K8ac_peak_22835 | 10.29344 | SMARCA5_ENSG00000153147;SMARCA5-AS1_ENSG00000245112    |
| 4 | 144444299 | 1.44E+08 | KD2-H4K8ac_peak_22836 | 6.16888  |                                                        |
| 4 | 144480555 | 1.44E+08 | KD2-H4K8ac_peak_22837 | 13.80019 | GUSBP5_ENSG00000236296                                 |
| 4 | 146019507 | 1.46E+08 | KD2-H4K8ac_peak_22838 | 7.27716  | ANAPC10_ENSG00000164162;ABCE1_ENSG00000164163          |
| 4 | 146101042 | 1.46E+08 | KD2-H4K8ac_peak_22839 | 14.84212 | OTUD4_ENSG00000164164                                  |
| 4 | 146402971 | 1.46E+08 | KD2-H4K8ac_peak_22840 | 16.09057 | SMAD1_ENSG00000170365                                  |
| 4 | 146539945 | 1.47E+08 | KD2-H4K8ac_peak_22841 | 11.86082 | MMAA_ENSG00000151611                                   |
| 4 | 146540665 | 1.47E+08 | KD2-H4K8ac_peak_22842 | 4.42765  |                                                        |
| 4 | 146653950 | 1.47E+08 | KD2-H4K8ac_peak_22843 | 22.21705 |                                                        |
| 4 | 146857237 | 1.47E+08 | KD2-H4K8ac_peak_22844 | 14.3374  |                                                        |
| 4 | 146858391 | 1.47E+08 | KD2-H4K8ac_peak_22845 | 10.43145 |                                                        |
| 4 | 147157705 | 1.47E+08 | KD2-H4K8ac_peak_22846 | 5.43522  |                                                        |
| 4 | 147158929 | 1.47E+08 | KD2-H4K8ac_peak_22847 | 4.42765  |                                                        |
| 4 | 147162755 | 1.47E+08 | KD2-H4K8ac_peak_22848 | 6.9809   | RP11-6L6.7_ENSG00000251010                             |
| 4 | 147163437 | 1.47E+08 | KD2-H4K8ac_peak_22849 | 10.19949 | RP11-6L6.7_ENSG00000251010                             |
| 4 | 147443675 | 1.47E+08 | KD2-H4K8ac_peak_22850 | 10.19949 | SLC10A7_ENSG00000120519                                |
| 4 | 147569082 | 1.48E+08 | KD2-H4K8ac_peak_22851 | 7.12754  |                                                        |
| 4 | 148000917 | 1.48E+08 | KD2-H4K8ac_peak_22852 | 4.49837  |                                                        |
| 4 | 148538677 | 1.49E+08 | KD2-H4K8ac_peak_22853 | 9.06369  | RP11-425A23.1_ENSG00000251298;TMEM184C_ENSG00000164168 |
| 4 | 148643919 | 1.49E+08 | KD2-H4K8ac_peak_22854 | 5.13341  |                                                        |
| 4 | 148652866 | 1.49E+08 | KD2-H4K8ac_peak_22855 | 7.18615  | ARHGAP10_ENSG00000071205                               |
| 4 | 148653510 | 1.49E+08 | KD2-H4K8ac_peak_22856 | 9.41619  | ARHGAP10_ENSG00000071205                               |
| 4 | 148783099 | 1.49E+08 | KD2-H4K8ac_peak_22857 | 6.66692  |                                                        |
| 4 | 149206516 | 1.49E+08 | KD2-H4K8ac_peak_22858 | 8.84031  |                                                        |
| 4 | 149363874 | 1.49E+08 | KD2-H4K8ac_peak_22859 | 5.75757  |                                                        |
| 4 | 150998325 | 1.51E+08 | KD2-H4K8ac_peak_22860 | 6.31143  | DCLK2_ENSG00000170390                                  |

|   |           |          |                       |          |                                                        |
|---|-----------|----------|-----------------------|----------|--------------------------------------------------------|
| 4 | 150999489 | 1.51E+08 | KD2-H4K8ac_peak_22861 | 10.21366 | DCLK2_ENSG00000170390                                  |
| 4 | 151000291 | 1.51E+08 | KD2-H4K8ac_peak_22862 | 4.06758  | DCLK2_ENSG00000170390                                  |
| 4 | 151936598 | 1.52E+08 | KD2-H4K8ac_peak_22863 | 11.80283 | LRBA_ENSG00000198589                                   |
| 4 | 152019254 | 1.52E+08 | KD2-H4K8ac_peak_22864 | 5.6755   |                                                        |
| 4 | 152019852 | 1.52E+08 | KD2-H4K8ac_peak_22865 | 9.89126  | RPS3A_ENSG00000145425                                  |
| 4 | 152020861 | 1.52E+08 | KD2-H4K8ac_peak_22866 | 3.90565  | RPS3A_ENSG00000145425                                  |
| 4 | 152246293 | 1.52E+08 | KD2-H4K8ac_peak_22867 | 10.77651 | SH3D19_ENSG00000109686                                 |
| 4 | 152329698 | 1.52E+08 | KD2-H4K8ac_peak_22868 | 9.15069  | RP11-610P16.1_ENSG00000251611;FAM160A1_ENSG00000164142 |
| 4 | 152330581 | 1.52E+08 | KD2-H4K8ac_peak_22869 | 6.0073   | RP11-610P16.1_ENSG00000251611;FAM160A1_ENSG00000164142 |
| 4 | 152463158 | 1.52E+08 | KD2-H4K8ac_peak_22870 | 10.39154 |                                                        |
| 4 | 152596143 | 1.53E+08 | KD2-H4K8ac_peak_22871 | 5.57044  | RP11-164P12.3_ENSG00000251455                          |
| 4 | 152681470 | 1.53E+08 | KD2-H4K8ac_peak_22872 | 10.63441 | PET112_ENSG00000059691                                 |
| 4 | 152682400 | 1.53E+08 | KD2-H4K8ac_peak_22873 | 6.79289  | PET112_ENSG00000059691                                 |
| 4 | 153168881 | 1.53E+08 | KD2-H4K8ac_peak_22874 | 7.22457  |                                                        |
| 4 | 153457617 | 1.53E+08 | KD2-H4K8ac_peak_22875 | 6.83936  | FBXW7_ENSG00000109670;MIR4453_ENSG00000268471          |
| 4 | 153600910 | 1.54E+08 | KD2-H4K8ac_peak_22876 | 5.54647  | TMEM154_ENSG00000170006                                |
| 4 | 153700429 | 1.54E+08 | KD2-H4K8ac_peak_22877 | 13.70753 | TIGD4_ENSG00000169989;ARFIP1_ENSG00000164144           |
| 4 | 153701209 | 1.54E+08 | KD2-H4K8ac_peak_22878 | 10.29344 | TIGD4_ENSG00000169989;ARFIP1_ENSG00000164144           |
| 4 | 154004064 | 1.54E+08 | KD2-H4K8ac_peak_22879 | 8.84031  |                                                        |
| 4 | 154048839 | 1.54E+08 | KD2-H4K8ac_peak_22880 | 7.51935  |                                                        |
| 4 | 154049603 | 1.54E+08 | KD2-H4K8ac_peak_22881 | 10.72656 |                                                        |
| 4 | 154060301 | 1.54E+08 | KD2-H4K8ac_peak_22882 | 3.75035  |                                                        |
| 4 | 154063074 | 1.54E+08 | KD2-H4K8ac_peak_22883 | 8.30974  |                                                        |
| 4 | 154063686 | 1.54E+08 | KD2-H4K8ac_peak_22884 | 11.00314 |                                                        |
| 4 | 154064365 | 1.54E+08 | KD2-H4K8ac_peak_22885 | 12.84642 |                                                        |
| 4 | 154067439 | 1.54E+08 | KD2-H4K8ac_peak_22886 | 3.75035  |                                                        |
| 4 | 154072609 | 1.54E+08 | KD2-H4K8ac_peak_22887 | 6.86699  | TRIM2_ENSG00000109654                                  |
| 4 | 154073207 | 1.54E+08 | KD2-H4K8ac_peak_22888 | 9.63776  | TRIM2_ENSG00000109654                                  |
| 4 | 154073691 | 1.54E+08 | KD2-H4K8ac_peak_22889 | 19.33282 | TRIM2_ENSG00000109654                                  |
| 4 | 154077594 | 1.54E+08 | KD2-H4K8ac_peak_22890 | 6.44277  |                                                        |
| 4 | 154143395 | 1.54E+08 | KD2-H4K8ac_peak_22891 | 7.27716  |                                                        |
| 4 | 154144012 | 1.54E+08 | KD2-H4K8ac_peak_22892 | 11.92978 |                                                        |
| 4 | 154170664 | 1.54E+08 | KD2-H4K8ac_peak_22893 | 7.76329  |                                                        |
| 4 | 154182340 | 1.54E+08 | KD2-H4K8ac_peak_22894 | 7.11925  |                                                        |
| 4 | 154240614 | 1.54E+08 | KD2-H4K8ac_peak_22895 | 4.77079  |                                                        |
| 4 | 154386738 | 1.54E+08 | KD2-H4K8ac_peak_22896 | 6.99815  | KIAA0922_ENSG00000121210                               |
| 4 | 154605721 | 1.55E+08 | KD2-H4K8ac_peak_22897 | 6.64891  |                                                        |
| 4 | 154680532 | 1.55E+08 | KD2-H4K8ac_peak_22898 | 17.8868  | RNF175_ENSG00000145428                                 |
| 4 | 156298323 | 1.56E+08 | KD2-H4K8ac_peak_22899 | 7.12754  | MAP9_ENSG00000164114                                   |
| 4 | 156513222 | 1.57E+08 | KD2-H4K8ac_peak_22900 | 6.64891  |                                                        |
| 4 | 156587913 | 1.57E+08 | KD2-H4K8ac_peak_22901 | 7.92775  | GUCY1A3_ENSG00000164116                                |
| 4 | 156680238 | 1.57E+08 | KD2-H4K8ac_peak_22902 | 12.00273 | GUCY1B3_ENSG00000061918                                |
| 4 | 156680985 | 1.57E+08 | KD2-H4K8ac_peak_22903 | 3.90565  | GUCY1B3_ENSG00000061918                                |
| 4 | 156874497 | 1.57E+08 | KD2-H4K8ac_peak_22904 | 12.57297 | CTSO_ENSG00000256043                                   |
| 4 | 157211304 | 1.57E+08 | KD2-H4K8ac_peak_22905 | 6.16888  |                                                        |
| 4 | 157997504 | 1.58E+08 | KD2-H4K8ac_peak_22906 | 5.92591  |                                                        |

|   |           |          |                       |          |                                                     |
|---|-----------|----------|-----------------------|----------|-----------------------------------------------------|
| 4 | 159220044 | 1.59E+08 | KD2-H4K8ac_peak_22907 | 4.35346  |                                                     |
| 4 | 159644161 | 1.6E+08  | KD2-H4K8ac_peak_22908 | 4.54006  | PPID_ENSG00000171497                                |
| 4 | 159644669 | 1.6E+08  | KD2-H4K8ac_peak_22909 | 17.14886 | PPID_ENSG00000171497                                |
| 4 | 159689137 | 1.6E+08  | KD2-H4K8ac_peak_22910 | 10.21502 | FNIP2_ENSG00000052795                               |
| 4 | 159689604 | 1.6E+08  | KD2-H4K8ac_peak_22911 | 15.61313 | FNIP2_ENSG00000052795                               |
| 4 | 159745666 | 1.6E+08  | KD2-H4K8ac_peak_22912 | 4.211    |                                                     |
| 4 | 159791551 | 1.6E+08  | KD2-H4K8ac_peak_22913 | 6.40297  |                                                     |
| 4 | 160023637 | 1.6E+08  | KD2-H4K8ac_peak_22914 | 8.2413   |                                                     |
| 4 | 160024320 | 1.6E+08  | KD2-H4K8ac_peak_22915 | 5.01002  | RAPGEF2_ENSG00000109756                             |
| 4 | 160423155 | 1.6E+08  | KD2-H4K8ac_peak_22916 | 5.40638  |                                                     |
| 4 | 160427300 | 1.6E+08  | KD2-H4K8ac_peak_22917 | 5.57044  | U3_ENSG00000251979                                  |
| 4 | 164087619 | 1.64E+08 | KD2-H4K8ac_peak_22918 | 8.79106  | NAF1_ENSG00000145414                                |
| 4 | 164088198 | 1.64E+08 | KD2-H4K8ac_peak_22919 | 10.05606 | NAF1_ENSG00000145414                                |
| 4 | 164414798 | 1.64E+08 | KD2-H4K8ac_peak_22920 | 4.37708  | TMA16_ENSG00000198498                               |
| 4 | 164415323 | 1.64E+08 | KD2-H4K8ac_peak_22921 | 14.8083  | TMA16_ENSG00000198498                               |
| 4 | 165877961 | 1.66E+08 | KD2-H4K8ac_peak_22922 | 6.40683  | FAM218A_ENSG00000250486                             |
| 4 | 166128204 | 1.66E+08 | KD2-H4K8ac_peak_22923 | 11.05407 | TMEM192_ENSG00000170088;KLHL2_ENSG00000109466       |
| 4 | 166248865 | 1.66E+08 | KD2-H4K8ac_peak_22924 | 15.039   | MSMO1_ENSG00000052802                               |
| 4 | 169239566 | 1.69E+08 | KD2-H4K8ac_peak_22925 | 12.84642 | DDX60_ENSG00000137628                               |
| 4 | 169401253 | 1.69E+08 | KD2-H4K8ac_peak_22926 | 17.43705 |                                                     |
| 4 | 169555307 | 1.7E+08  | KD2-H4K8ac_peak_22927 | 4.7849   |                                                     |
| 4 | 169563592 | 1.7E+08  | KD2-H4K8ac_peak_22928 | 8.59579  |                                                     |
| 4 | 169569268 | 1.7E+08  | KD2-H4K8ac_peak_22929 | 5.40638  | RP11-610J23.1_ENSG00000249623                       |
| 4 | 169579517 | 1.7E+08  | KD2-H4K8ac_peak_22930 | 5.64449  |                                                     |
| 4 | 169752990 | 1.7E+08  | KD2-H4K8ac_peak_22931 | 12.00273 | RP11-635L1.3_ENSG00000249609                        |
| 4 | 169930557 | 1.7E+08  | KD2-H4K8ac_peak_22932 | 6.90231  | CBR4_ENSG00000145439;RP11-483A20.3_ENSG00000251445  |
| 4 | 169936470 | 1.7E+08  | KD2-H4K8ac_peak_22933 | 7.55771  |                                                     |
| 4 | 169959916 | 1.7E+08  | KD2-H4K8ac_peak_22934 | 5.01262  |                                                     |
| 4 | 170006571 | 1.7E+08  | KD2-H4K8ac_peak_22935 | 6.51023  |                                                     |
| 4 | 170191810 | 1.7E+08  | KD2-H4K8ac_peak_22936 | 16.57619 | SH3RF1_ENSG00000154447                              |
| 4 | 170533405 | 1.71E+08 | KD2-H4K8ac_peak_22937 | 5.9696   | NEK1_ENSG00000137601;CLCN3_ENSG00000109572          |
| 4 | 170713176 | 1.71E+08 | KD2-H4K8ac_peak_22938 | 9.73431  | PTGES3P3_ENSG00000229204                            |
| 4 | 170728475 | 1.71E+08 | KD2-H4K8ac_peak_22939 | 5.57044  |                                                     |
| 4 | 170947214 | 1.71E+08 | KD2-H4K8ac_peak_22940 | 11.77304 |                                                     |
| 4 | 170947729 | 1.71E+08 | KD2-H4K8ac_peak_22941 | 10.96455 |                                                     |
| 4 | 171010953 | 1.71E+08 | KD2-H4K8ac_peak_22942 | 9.402    |                                                     |
| 4 | 174089986 | 1.74E+08 | KD2-H4K8ac_peak_22943 | 16.73922 | RP11-10K16.1_ENSG00000245213;GALNT7_ENSG00000109586 |
| 4 | 174255042 | 1.74E+08 | KD2-H4K8ac_peak_22944 | 16.32216 | HMGB2_ENSG00000164104                               |
| 4 | 174255978 | 1.74E+08 | KD2-H4K8ac_peak_22945 | 8.85813  | HMGB2_ENSG00000164104                               |
| 4 | 174411922 | 1.74E+08 | KD2-H4K8ac_peak_22946 | 8.17902  |                                                     |
| 4 | 174427875 | 1.74E+08 | KD2-H4K8ac_peak_22947 | 10.17341 |                                                     |
| 4 | 174429631 | 1.74E+08 | KD2-H4K8ac_peak_22948 | 8.95692  |                                                     |
| 4 | 174430413 | 1.74E+08 | KD2-H4K8ac_peak_22949 | 9.91109  |                                                     |
| 4 | 174431531 | 1.74E+08 | KD2-H4K8ac_peak_22950 | 4.52804  |                                                     |
| 4 | 174432133 | 1.74E+08 | KD2-H4K8ac_peak_22951 | 7.24717  |                                                     |
| 4 | 174437751 | 1.74E+08 | KD2-H4K8ac_peak_22952 | 7.36799  |                                                     |

|   |           |          |                       |          |                                                                               |
|---|-----------|----------|-----------------------|----------|-------------------------------------------------------------------------------|
| 4 | 174439042 | 1.74E+08 | KD2-H4K8ac_peak_22953 | 9.1707   |                                                                               |
| 4 | 174439644 | 1.74E+08 | KD2-H4K8ac_peak_22954 | 11.52628 |                                                                               |
| 4 | 174442801 | 1.74E+08 | KD2-H4K8ac_peak_22955 | 6.65673  |                                                                               |
| 4 | 174443771 | 1.74E+08 | KD2-H4K8ac_peak_22956 | 5.61067  |                                                                               |
| 4 | 174444585 | 1.74E+08 | KD2-H4K8ac_peak_22957 | 6.67092  |                                                                               |
| 4 | 174446459 | 1.74E+08 | KD2-H4K8ac_peak_22958 | 6.9039   |                                                                               |
| 4 | 174450710 | 1.74E+08 | KD2-H4K8ac_peak_22959 | 5.13615  | HAND2_ENSG00000164107                                                         |
| 4 | 174451760 | 1.74E+08 | KD2-H4K8ac_peak_22960 | 6.76298  | HAND2_ENSG00000164107                                                         |
| 4 | 174452395 | 1.74E+08 | KD2-H4K8ac_peak_22961 | 16.95032 |                                                                               |
| 4 | 174453987 | 1.74E+08 | KD2-H4K8ac_peak_22962 | 7.09076  |                                                                               |
| 4 | 174458826 | 1.74E+08 | KD2-H4K8ac_peak_22963 | 14.66631 |                                                                               |
| 4 | 174857082 | 1.75E+08 | KD2-H4K8ac_peak_22964 | 4.59928  |                                                                               |
| 4 | 174910018 | 1.75E+08 | KD2-H4K8ac_peak_22965 | 8.17902  |                                                                               |
| 4 | 174925959 | 1.75E+08 | KD2-H4K8ac_peak_22966 | 6.03693  |                                                                               |
| 4 | 174929234 | 1.75E+08 | KD2-H4K8ac_peak_22967 | 5.835    |                                                                               |
| 4 | 174931835 | 1.75E+08 | KD2-H4K8ac_peak_22968 | 10.21502 |                                                                               |
| 4 | 174986391 | 1.75E+08 | KD2-H4K8ac_peak_22969 | 4.62142  |                                                                               |
| 4 | 175055514 | 1.75E+08 | KD2-H4K8ac_peak_22970 | 7.12754  |                                                                               |
| 4 | 175073580 | 1.75E+08 | KD2-H4K8ac_peak_22971 | 4.04247  |                                                                               |
| 4 | 175138163 | 1.75E+08 | KD2-H4K8ac_peak_22972 | 11.1952  |                                                                               |
| 4 | 175204928 | 1.75E+08 | KD2-H4K8ac_peak_22973 | 4.44527  | FBXO8_ENSG00000164117;CEP44_ENSG00000164118                                   |
| 4 | 176986594 | 1.77E+08 | KD2-H4K8ac_peak_22974 | 11.15509 | WDR17_ENSG00000150627                                                         |
| 4 | 176987162 | 1.77E+08 | KD2-H4K8ac_peak_22975 | 4.42765  | WDR17_ENSG00000150627                                                         |
| 4 | 177241318 | 1.77E+08 | KD2-H4K8ac_peak_22976 | 4.52514  | RP11-87F15.2_ENSG00000248980;SPCS3_ENSG00000129128                            |
| 4 | 178363336 | 1.78E+08 | KD2-H4K8ac_peak_22977 | 8.16906  | AGA_ENSG00000038002                                                           |
| 4 | 178364127 | 1.78E+08 | KD2-H4K8ac_peak_22978 | 9.15069  | AGA_ENSG00000038002                                                           |
| 4 | 181881468 | 1.82E+08 | KD2-H4K8ac_peak_22979 | 6.40683  |                                                                               |
| 4 | 182887605 | 1.83E+08 | KD2-H4K8ac_peak_22980 | 6.40683  |                                                                               |
| 4 | 183012499 | 1.83E+08 | KD2-H4K8ac_peak_22981 | 10.17698 |                                                                               |
| 4 | 183065405 | 1.83E+08 | KD2-H4K8ac_peak_22982 | 19.3524  | AC108142.1_ENSG00000177822;TENM3_ENSG00000218336;RP11-402C9.1_ENSG00000248266 |
| 4 | 183369249 | 1.83E+08 | KD2-H4K8ac_peak_22983 | 10.43145 |                                                                               |
| 4 | 183727484 | 1.84E+08 | KD2-H4K8ac_peak_22984 | 7.07117  |                                                                               |
| 4 | 183799849 | 1.84E+08 | KD2-H4K8ac_peak_22985 | 4.06758  |                                                                               |
| 4 | 183801354 | 1.84E+08 | KD2-H4K8ac_peak_22986 | 5.45396  |                                                                               |
| 4 | 183802047 | 1.84E+08 | KD2-H4K8ac_peak_22987 | 6.2781   | RP11-188P17.2_ENSG00000272646                                                 |
| 4 | 183837630 | 1.84E+08 | KD2-H4K8ac_peak_22988 | 16.57619 | DCTD_ENSG00000129187                                                          |
| 4 | 183838673 | 1.84E+08 | KD2-H4K8ac_peak_22989 | 13.44374 | DCTD_ENSG00000129187                                                          |
| 4 | 184019395 | 1.84E+08 | KD2-H4K8ac_peak_22990 | 11.92978 | WWC2-AS2_ENSG00000251359;WWC2_ENSG00000151718                                 |
| 4 | 184062873 | 1.84E+08 | KD2-H4K8ac_peak_22991 | 4.57371  |                                                                               |
| 4 | 184319035 | 1.84E+08 | KD2-H4K8ac_peak_22992 | 26.15943 |                                                                               |
| 4 | 184365036 | 1.84E+08 | KD2-H4K8ac_peak_22993 | 13.81781 | CDKN2AIP_ENSG00000168564                                                      |
| 4 | 184366018 | 1.84E+08 | KD2-H4K8ac_peak_22994 | 6.67092  | CDKN2AIP_ENSG00000168564                                                      |
| 4 | 184426845 | 1.84E+08 | KD2-H4K8ac_peak_22995 | 13.88933 | ING2_ENSG00000168556                                                          |
| 4 | 184579814 | 1.85E+08 | KD2-H4K8ac_peak_22996 | 15.59774 | RWDD4_ENSG00000182552;TRAPPC11_ENSG00000168538                                |
| 4 | 184643374 | 1.85E+08 | KD2-H4K8ac_peak_22997 | 11.89502 |                                                                               |
| 4 | 184719186 | 1.85E+08 | KD2-H4K8ac_peak_22998 | 6.30229  |                                                                               |



|   |           |          |                       |          |                                                      |
|---|-----------|----------|-----------------------|----------|------------------------------------------------------|
| 4 | 184797741 | 1.85E+08 | KD2-H4K8ac_peak_22999 | 6.90231  |                                                      |
| 4 | 184827827 | 1.85E+08 | KD2-H4K8ac_peak_23000 | 11.86082 |                                                      |
| 4 | 184986168 | 1.85E+08 | KD2-H4K8ac_peak_23001 | 6.1846   |                                                      |
| 4 | 184987185 | 1.85E+08 | KD2-H4K8ac_peak_23002 | 6.31143  |                                                      |
| 4 | 184988746 | 1.85E+08 | KD2-H4K8ac_peak_23003 | 4.67342  |                                                      |
| 4 | 185015737 | 1.85E+08 | KD2-H4K8ac_peak_23004 | 5.08628  |                                                      |
| 4 | 185018355 | 1.85E+08 | KD2-H4K8ac_peak_23005 | 5.87879  |                                                      |
| 4 | 185184911 | 1.85E+08 | KD2-H4K8ac_peak_23006 | 9.97423  |                                                      |
| 4 | 185264922 | 1.85E+08 | KD2-H4K8ac_peak_23007 | 4.06758  |                                                      |
| 4 | 185373329 | 1.85E+08 | KD2-H4K8ac_peak_23008 | 3.96965  |                                                      |
| 4 | 185393892 | 1.85E+08 | KD2-H4K8ac_peak_23009 | 15.20126 | IRF2_ENSG00000168310;RP11-326I11.5_ENSG00000270426   |
| 4 | 185395990 | 1.85E+08 | KD2-H4K8ac_peak_23010 | 9.73431  | IRF2_ENSG00000168310;RP11-326I11.3_ENSG00000271646   |
| 4 | 185458437 | 1.85E+08 | KD2-H4K8ac_peak_23011 | 7.47462  | RP11-326I11.4_ENSG00000271538                        |
| 4 | 185570000 | 1.86E+08 | KD2-H4K8ac_peak_23012 | 5.30799  | CASP3_ENSG00000164305;PRIMPOL_ENSG00000164306        |
| 4 | 185570849 | 1.86E+08 | KD2-H4K8ac_peak_23013 | 10.0692  | CASP3_ENSG00000164305;PRIMPOL_ENSG00000164306        |
| 4 | 185669576 | 1.86E+08 | KD2-H4K8ac_peak_23014 | 4.57371  |                                                      |
| 4 | 185705733 | 1.86E+08 | KD2-H4K8ac_peak_23015 | 5.14125  |                                                      |
| 4 | 185707070 | 1.86E+08 | KD2-H4K8ac_peak_23016 | 6.65673  |                                                      |
| 4 | 185746487 | 1.86E+08 | KD2-H4K8ac_peak_23017 | 5.61067  |                                                      |
| 4 | 185747398 | 1.86E+08 | KD2-H4K8ac_peak_23018 | 6.98244  | ACSL1_ENSG00000151726                                |
| 4 | 185775223 | 1.86E+08 | KD2-H4K8ac_peak_23019 | 5.15777  |                                                      |
| 4 | 186048211 | 1.86E+08 | KD2-H4K8ac_peak_23020 | 9.63487  |                                                      |
| 4 | 186063880 | 1.86E+08 | KD2-H4K8ac_peak_23021 | 7.96322  | SLC25A4_ENSG00000151729                              |
| 4 | 186070752 | 1.86E+08 | KD2-H4K8ac_peak_23022 | 6.4095   |                                                      |
| 4 | 186124613 | 1.86E+08 | KD2-H4K8ac_peak_23023 | 8.85813  | SNX25_ENSG00000109762                                |
| 4 | 186130883 | 1.86E+08 | KD2-H4K8ac_peak_23024 | 6.25869  | KIAA1430_ENSG00000164323                             |
| 4 | 186266768 | 1.86E+08 | KD2-H4K8ac_peak_23025 | 5.3778   |                                                      |
| 4 | 186317170 | 1.86E+08 | KD2-H4K8ac_peak_23026 | 8.85813  | LRP2BP_ENSG00000109771;ANKRD37_ENSG00000186352       |
| 4 | 186347233 | 1.86E+08 | KD2-H4K8ac_peak_23027 | 5.75757  | UFSP2_ENSG00000109775;C4orf47_ENSG00000205129        |
| 4 | 186392732 | 1.86E+08 | KD2-H4K8ac_peak_23028 | 4.54006  | CCDC110_ENSG00000168491;RP11-279O9.4_ENSG00000249679 |
| 4 | 186456227 | 1.86E+08 | KD2-H4K8ac_peak_23029 | 12.57828 | PDLIM3_ENSG00000154553                               |
| 4 | 186494796 | 1.86E+08 | KD2-H4K8ac_peak_23030 | 10.05606 |                                                      |
| 4 | 186559869 | 1.87E+08 | KD2-H4K8ac_peak_23031 | 8.17902  |                                                      |
| 4 | 186732138 | 1.87E+08 | KD2-H4K8ac_peak_23032 | 10.0746  |                                                      |
| 4 | 186768825 | 1.87E+08 | KD2-H4K8ac_peak_23033 | 6.25869  |                                                      |
| 4 | 186831563 | 1.87E+08 | KD2-H4K8ac_peak_23034 | 7.96194  |                                                      |
| 4 | 186877287 | 1.87E+08 | KD2-H4K8ac_peak_23035 | 5.9696   | SORBS2_ENSG00000154556                               |
| 4 | 186942674 | 1.87E+08 | KD2-H4K8ac_peak_23036 | 13.56967 |                                                      |
| 4 | 186951251 | 1.87E+08 | KD2-H4K8ac_peak_23037 | 11.24702 |                                                      |
| 4 | 187025976 | 1.87E+08 | KD2-H4K8ac_peak_23038 | 10.53377 | FAM149A_ENSG00000109794                              |
| 4 | 187066209 | 1.87E+08 | KD2-H4K8ac_peak_23039 | 7.76329  |                                                      |
| 4 | 187111846 | 1.87E+08 | KD2-H4K8ac_peak_23040 | 16.57619 | AC110771.1_ENSG00000269302;CYP4V2_ENSG00000145476    |
| 4 | 187476576 | 1.87E+08 | KD2-H4K8ac_peak_23041 | 4.42765  | RP11-215A19.2_ENSG00000272297;MTNR1A_ENSG00000168412 |
| 4 | 187644494 | 1.88E+08 | KD2-H4K8ac_peak_23042 | 10.21502 |                                                      |
| 4 | 187647594 | 1.88E+08 | KD2-H4K8ac_peak_23043 | 5.88845  | FAT1_ENSG00000083857                                 |
| 4 | 190224447 | 1.9E+08  | KD2-H4K8ac_peak_23044 | 6.40683  |                                                      |

|   |           |          |                       |          |                                                           |
|---|-----------|----------|-----------------------|----------|-----------------------------------------------------------|
| 4 | 190504346 | 1.91E+08 | KD2-H4K8ac_peak_23045 | 7.55771  |                                                           |
| 4 | 190508935 | 1.91E+08 | KD2-H4K8ac_peak_23046 | 7.01964  |                                                           |
| 4 | 190520523 | 1.91E+08 | KD2-H4K8ac_peak_23047 | 9.11818  |                                                           |
| 4 | 190521245 | 1.91E+08 | KD2-H4K8ac_peak_23048 | 16.57619 |                                                           |
| 4 | 190522359 | 1.91E+08 | KD2-H4K8ac_peak_23049 | 5.10276  |                                                           |
| 4 | 190522953 | 1.91E+08 | KD2-H4K8ac_peak_23050 | 9.16531  |                                                           |
| 4 | 190524368 | 1.91E+08 | KD2-H4K8ac_peak_23051 | 7.12754  |                                                           |
| 4 | 190825891 | 1.91E+08 | KD2-H4K8ac_peak_23052 | 6.64891  |                                                           |
| 4 | 190861416 | 1.91E+08 | KD2-H4K8ac_peak_23053 | 20.02161 | AF146191.4_ENSG00000245685;FRG1_ENSG00000109536           |
| 4 | 190862128 | 1.91E+08 | KD2-H4K8ac_peak_23054 | 7.76329  | AF146191.4_ENSG00000245685;FRG1_ENSG00000109536           |
| 5 | 53773     | 54206    | KD2-H4K8ac_peak_23055 | 7.12754  |                                                           |
| 5 | 90630     | 92054    | KD2-H4K8ac_peak_23056 | 24.47492 | CTD-2231H16.1_ENSG00000249430                             |
| 5 | 218471    | 219023   | KD2-H4K8ac_peak_23057 | 15.81711 | CCDC127_ENSG00000164366;SDHA_ENSG00000073578              |
| 5 | 271240    | 271470   | KD2-H4K8ac_peak_23058 | 9.34195  | CTD-2083E4.6_ENSG00000248925;PDCD6_ENSG00000249915        |
| 5 | 316160    | 316357   | KD2-H4K8ac_peak_23059 | 4.42765  |                                                           |
| 5 | 344199    | 344579   | KD2-H4K8ac_peak_23060 | 18.5703  |                                                           |
| 5 | 373375    | 374646   | KD2-H4K8ac_peak_23061 | 16.32216 |                                                           |
| 5 | 442224    | 442609   | KD2-H4K8ac_peak_23062 | 6.04107  | C5orf55_ENSG00000221990;EXOC3_ENSG00000180104             |
| 5 | 442861    | 443158   | KD2-H4K8ac_peak_23063 | 5.75757  | C5orf55_ENSG00000221990;EXOC3_ENSG00000180104             |
| 5 | 443471    | 443820   | KD2-H4K8ac_peak_23064 | 7.167    | C5orf55_ENSG00000221990;EXOC3_ENSG00000180104             |
| 5 | 472504    | 473120   | KD2-H4K8ac_peak_23065 | 17.19888 | CTD-2228K2.5_ENSG00000188242;CTD-2228K2.7_ENSG00000225138 |
| 5 | 473418    | 473659   | KD2-H4K8ac_peak_23066 | 6.65673  | CTD-2228K2.5_ENSG00000188242;CTD-2228K2.7_ENSG00000225138 |
| 5 | 612018    | 612260   | KD2-H4K8ac_peak_23067 | 13.31016 | RP11-310P5.1_ENSG00000249650;CEP72_ENSG00000112877        |
| 5 | 612626    | 612938   | KD2-H4K8ac_peak_23068 | 10.96455 | RP11-310P5.1_ENSG00000249650;CEP72_ENSG00000112877        |
| 5 | 693636    | 693968   | KD2-H4K8ac_peak_23069 | 15.9336  | TPPP_ENSG00000171368                                      |
| 5 | 785008    | 785591   | KD2-H4K8ac_peak_23070 | 15.66774 |                                                           |
| 5 | 850378    | 850590   | KD2-H4K8ac_peak_23071 | 6.99815  | ZDHHC11_ENSG00000188818                                   |
| 5 | 892430    | 892896   | KD2-H4K8ac_peak_23072 | 11.92978 | BRD9_ENSG00000028310;TRIP13_ENSG00000071539               |
| 5 | 893323    | 893532   | KD2-H4K8ac_peak_23073 | 9.402    | BRD9_ENSG00000028310;TRIP13_ENSG00000071539               |
| 5 | 947006    | 947319   | KD2-H4K8ac_peak_23074 | 8.02571  | RP11-661C8.2_ENSG00000248949                              |
| 5 | 947518    | 947711   | KD2-H4K8ac_peak_23075 | 6.66692  |                                                           |
| 5 | 1295592   | 1295794  | KD2-H4K8ac_peak_23076 | 5.88845  | TERT_ENSG00000164362                                      |
| 5 | 1344586   | 1344782  | KD2-H4K8ac_peak_23077 | 6.05809  | CLPTM1L_ENSG00000049656                                   |
| 5 | 1345316   | 1345615  | KD2-H4K8ac_peak_23078 | 11.09936 | CLPTM1L_ENSG00000049656                                   |
| 5 | 1386295   | 1386538  | KD2-H4K8ac_peak_23079 | 9.36665  |                                                           |
| 5 | 1467758   | 1468153  | KD2-H4K8ac_peak_23080 | 4.92515  |                                                           |
| 5 | 1523727   | 1525065  | KD2-H4K8ac_peak_23081 | 28.94181 | LPCAT1_ENSG00000153395                                    |
| 5 | 1594772   | 1595225  | KD2-H4K8ac_peak_23082 | 19.55721 | SDHAP3_ENSG00000185986;CTD-2012J19.3_ENSG00000271119      |
| 5 | 1633553   | 1634928  | KD2-H4K8ac_peak_23083 | 12.36441 | RP11-43F13.1_ENSG00000188002                              |
| 5 | 1799467   | 1799740  | KD2-H4K8ac_peak_23084 | 4.67342  |                                                           |
| 5 | 1800359   | 1800565  | KD2-H4K8ac_peak_23085 | 4.37815  | MRPL36_ENSG00000171421;NDUFS6_ENSG00000145494             |
| 5 | 1801594   | 1801848  | KD2-H4K8ac_peak_23086 | 12.93209 | MRPL36_ENSG00000171421;NDUFS6_ENSG00000145494             |
| 5 | 5026282   | 5026711  | KD2-H4K8ac_peak_23087 | 7.76329  |                                                           |
| 5 | 5270966   | 5271415  | KD2-H4K8ac_peak_23088 | 6.2781   |                                                           |
| 5 | 5272721   | 5272915  | KD2-H4K8ac_peak_23089 | 7.12754  |                                                           |
| 5 | 5273212   | 5273493  | KD2-H4K8ac_peak_23090 | 6.16888  |                                                           |

|   |          |          |                       |          |                                                           |
|---|----------|----------|-----------------------|----------|-----------------------------------------------------------|
| 5 | 5299201  | 5299514  | KD2-H4K8ac_peak_23091 | 4.66652  |                                                           |
| 5 | 5318139  | 5318465  | KD2-H4K8ac_peak_23092 | 8.17902  |                                                           |
| 5 | 5422534  | 5423428  | KD2-H4K8ac_peak_23093 | 11.22681 |                                                           |
| 5 | 5512150  | 5512388  | KD2-H4K8ac_peak_23094 | 8.17902  |                                                           |
| 5 | 5712310  | 5713513  | KD2-H4K8ac_peak_23095 | 9.63487  |                                                           |
| 5 | 6312385  | 6312646  | KD2-H4K8ac_peak_23096 | 6.31143  |                                                           |
| 5 | 6360473  | 6360751  | KD2-H4K8ac_peak_23097 | 9.23578  |                                                           |
| 5 | 6378843  | 6379742  | KD2-H4K8ac_peak_23098 | 15.5861  | MED10_ENSG00000133398                                     |
| 5 | 6632926  | 6633338  | KD2-H4K8ac_peak_23099 | 5.64429  | NSUN2_ENSG00000037474;SRD5A1_ENSG00000145545              |
| 5 | 6633844  | 6634267  | KD2-H4K8ac_peak_23100 | 3.90092  | NSUN2_ENSG00000037474;SRD5A1_ENSG00000145545              |
| 5 | 6704815  | 6705036  | KD2-H4K8ac_peak_23101 | 6.66692  |                                                           |
| 5 | 6712248  | 6712972  | KD2-H4K8ac_peak_23102 | 8.85813  |                                                           |
| 5 | 6766215  | 6766542  | KD2-H4K8ac_peak_23103 | 9.06369  | RP11-332J15.3_ENSG00000251365                             |
| 5 | 6772812  | 6773536  | KD2-H4K8ac_peak_23104 | 11.05407 |                                                           |
| 5 | 7851015  | 7851545  | KD2-H4K8ac_peak_23105 | 11.05407 | C5orf49_ENSG00000215217;MTRR_ENSG00000124275              |
| 5 | 7868753  | 7869039  | KD2-H4K8ac_peak_23106 | 4.86324  | FASTKD3_ENSG00000124279                                   |
| 5 | 7869388  | 7869764  | KD2-H4K8ac_peak_23107 | 6.97919  | FASTKD3_ENSG00000124279                                   |
| 5 | 8457894  | 8458209  | KD2-H4K8ac_peak_23108 | 8.4716   | RP11-480D4.1_ENSG00000245729;RP11-480D4.2_ENSG00000249159 |
| 5 | 9954095  | 9954293  | KD2-H4K8ac_peak_23109 | 6.8836   |                                                           |
| 5 | 10249655 | 10249926 | KD2-H4K8ac_peak_23110 | 18.41507 | FAM173B_ENSG00000150756;CCT5_ENSG00000150753              |
| 5 | 10250571 | 10250990 | KD2-H4K8ac_peak_23111 | 13.12288 | FAM173B_ENSG00000150756;CCT5_ENSG00000150753              |
| 5 | 10307597 | 10308001 | KD2-H4K8ac_peak_23112 | 9.20193  | CMBL_ENSG00000164237                                      |
| 5 | 10352981 | 10353660 | KD2-H4K8ac_peak_23113 | 14.39547 | CTD-2256P15.2_ENSG00000259802;MARCH6_ENSG00000145495      |
| 5 | 10353949 | 10354282 | KD2-H4K8ac_peak_23114 | 11.50346 | CTD-2256P15.2_ENSG00000259802;MARCH6_ENSG00000145495      |
| 5 | 10527558 | 10528192 | KD2-H4K8ac_peak_23115 | 7.40111  |                                                           |
| 5 | 10601755 | 10602466 | KD2-H4K8ac_peak_23116 | 8.59579  |                                                           |
| 5 | 10654955 | 10655315 | KD2-H4K8ac_peak_23117 | 10.02417 | RP11-54F2.1_ENSG00000251196;RP11-215G15.5_ENSG00000272016 |
| 5 | 10662684 | 10662921 | KD2-H4K8ac_peak_23118 | 6.00226  |                                                           |
| 5 | 10760794 | 10761182 | KD2-H4K8ac_peak_23119 | 9.11031  | DAP_ENSG00000112977;CTD-2154B17.4_ENSG00000272324         |
| 5 | 10761636 | 10761899 | KD2-H4K8ac_peak_23120 | 8.52559  | DAP_ENSG00000112977;CTD-2154B17.4_ENSG00000272324         |
| 5 | 12574090 | 12574577 | KD2-H4K8ac_peak_23121 | 8.94469  | RP11-308B16.2_ENSG00000248783;CT49_ENSG00000248131        |
| 5 | 14011236 | 14011465 | KD2-H4K8ac_peak_23122 | 7.13615  |                                                           |
| 5 | 14142795 | 14143157 | KD2-H4K8ac_peak_23123 | 11.09936 | TRIO_ENSG00000038382                                      |
| 5 | 14250307 | 14250659 | KD2-H4K8ac_peak_23124 | 13.81781 |                                                           |
| 5 | 14410228 | 14410421 | KD2-H4K8ac_peak_23125 | 7.47462  |                                                           |
| 5 | 14416929 | 14417231 | KD2-H4K8ac_peak_23126 | 15.81711 |                                                           |
| 5 | 14417931 | 14419123 | KD2-H4K8ac_peak_23127 | 16.63953 |                                                           |
| 5 | 14441155 | 14441749 | KD2-H4K8ac_peak_23128 | 6.36375  |                                                           |
| 5 | 14448394 | 14448789 | KD2-H4K8ac_peak_23129 | 6.2781   |                                                           |
| 5 | 14581444 | 14581728 | KD2-H4K8ac_peak_23130 | 6.66692  | FAM105A_ENSG00000145569                                   |
| 5 | 14581959 | 14582620 | KD2-H4K8ac_peak_23131 | 5.45396  | FAM105A_ENSG00000145569                                   |
| 5 | 14594583 | 14595019 | KD2-H4K8ac_peak_23132 | 12.2054  |                                                           |
| 5 | 14664304 | 14665181 | KD2-H4K8ac_peak_23133 | 12.06346 | CTD-2165H16.4_ENSG00000261360;FAM105B_ENSG00000154124     |
| 5 | 14871440 | 14871881 | KD2-H4K8ac_peak_23134 | 9.36516  | ANKH_ENSG00000154122;CTB-40H15.4_ENSG00000272057          |
| 5 | 14872201 | 14872670 | KD2-H4K8ac_peak_23135 | 19.6416  | ANKH_ENSG00000154122;CTB-40H15.4_ENSG00000272057          |
| 5 | 15500293 | 15500645 | KD2-H4K8ac_peak_23136 | 9.08816  | FBXL7_ENSG00000183580                                     |

|   |          |          |                       |          |                                                                                    |
|---|----------|----------|-----------------------|----------|------------------------------------------------------------------------------------|
| 5 | 15960645 | 15961206 | KD2-H4K8ac_peak_23137 | 5.88845  |                                                                                    |
| 5 | 16420211 | 16420458 | KD2-H4K8ac_peak_23138 | 5.07241  |                                                                                    |
| 5 | 16465153 | 16465352 | KD2-H4K8ac_peak_23139 | 9.50015  | ZNF622_ENSG00000173545                                                             |
| 5 | 16465575 | 16466387 | KD2-H4K8ac_peak_23140 | 17.91241 | ZNF622_ENSG00000173545                                                             |
| 5 | 16568805 | 16569014 | KD2-H4K8ac_peak_23141 | 7.12754  |                                                                                    |
| 5 | 16616725 | 16617644 | KD2-H4K8ac_peak_23142 | 13.50024 | FAM134B_ENSG00000154153;RP11-260E18.1_ENSG00000246214;CTC-461F20.1_ENSG00000250415 |
| 5 | 16936157 | 16936405 | KD2-H4K8ac_peak_23143 | 8.52559  | MYO10_ENSG00000145555                                                              |
| 5 | 16936602 | 16936967 | KD2-H4K8ac_peak_23144 | 7.59643  | MYO10_ENSG00000145555                                                              |
| 5 | 17217769 | 17218040 | KD2-H4K8ac_peak_23145 | 8.17902  | AC091878.1_ENSG00000215196                                                         |
| 5 | 17218505 | 17218774 | KD2-H4K8ac_peak_23146 | 5.71749  |                                                                                    |
| 5 | 17219399 | 17219814 | KD2-H4K8ac_peak_23147 | 6.07178  |                                                                                    |
| 5 | 17380223 | 17380519 | KD2-H4K8ac_peak_23148 | 4.77079  |                                                                                    |
| 5 | 21481733 | 21482366 | KD2-H4K8ac_peak_23149 | 11.00597 |                                                                                    |
| 5 | 21482659 | 21482916 | KD2-H4K8ac_peak_23150 | 14.38886 |                                                                                    |
| 5 | 31682949 | 31683149 | KD2-H4K8ac_peak_23151 | 6.24747  |                                                                                    |
| 5 | 31700927 | 31701685 | KD2-H4K8ac_peak_23152 | 10.29344 |                                                                                    |
| 5 | 31702210 | 31703295 | KD2-H4K8ac_peak_23153 | 18.5461  |                                                                                    |
| 5 | 31758448 | 31758881 | KD2-H4K8ac_peak_23154 | 6.05809  |                                                                                    |
| 5 | 32173855 | 32174306 | KD2-H4K8ac_peak_23155 | 7.49599  | GOLPH3_ENSG00000113384;CTD-2186M15.3_ENSG00000272086                               |
| 5 | 32174537 | 32174969 | KD2-H4K8ac_peak_23156 | 24.23593 | GOLPH3_ENSG00000113384;CTD-2186M15.3_ENSG00000272086                               |
| 5 | 32190544 | 32190772 | KD2-H4K8ac_peak_23157 | 6.79289  |                                                                                    |
| 5 | 32312479 | 32313000 | KD2-H4K8ac_peak_23158 | 16.8435  | MTMR12_ENSG00000150712                                                             |
| 5 | 32444216 | 32445447 | KD2-H4K8ac_peak_23159 | 9.36516  | ZFR_ENSG00000056097                                                                |
| 5 | 32585224 | 32585423 | KD2-H4K8ac_peak_23160 | 6.2781   |                                                                                    |
| 5 | 32585771 | 32586087 | KD2-H4K8ac_peak_23161 | 11.92978 |                                                                                    |
| 5 | 33441144 | 33441376 | KD2-H4K8ac_peak_23162 | 10.87093 | TARS_ENSG00000113407;CTD-2203K17.1_ENSG00000249572                                 |
| 5 | 34007738 | 34008139 | KD2-H4K8ac_peak_23163 | 10.96455 | AMACR_ENSG00000242110                                                              |
| 5 | 34008413 | 34008606 | KD2-H4K8ac_peak_23164 | 6.40683  | AMACR_ENSG00000242110                                                              |
| 5 | 34191461 | 34193732 | KD2-H4K8ac_peak_23165 | 49.08989 |                                                                                    |
| 5 | 34244986 | 34245291 | KD2-H4K8ac_peak_23166 | 18.38518 | RP11-1023L17.1_ENSG00000215158                                                     |
| 5 | 34656515 | 34657220 | KD2-H4K8ac_peak_23167 | 7.12754  | RAI14_ENSG00000039560;CTD-2024P10.1_ENSG00000250234                                |
| 5 | 34838814 | 34839205 | KD2-H4K8ac_peak_23168 | 8.52559  | CTD-2517O10.6_ENSG00000272323;TTC23L_ENSG00000205838                               |
| 5 | 34839549 | 34839745 | KD2-H4K8ac_peak_23169 | 8.30974  | CTD-2517O10.6_ENSG00000272323;TTC23L_ENSG00000205838                               |
| 5 | 34915869 | 34916205 | KD2-H4K8ac_peak_23170 | 18.29344 | BRIX1_ENSG00000113460                                                              |
| 5 | 34930031 | 34930374 | KD2-H4K8ac_peak_23171 | 9.92477  | DNAJC21_ENSG00000168724                                                            |
| 5 | 35617481 | 35617795 | KD2-H4K8ac_peak_23172 | 5.54647  | SPEF2_ENSG00000152582                                                              |
| 5 | 35618370 | 35618569 | KD2-H4K8ac_peak_23173 | 6.40683  | SPEF2_ENSG00000152582                                                              |
| 5 | 36079644 | 36079867 | KD2-H4K8ac_peak_23174 | 6.16888  |                                                                                    |
| 5 | 36151588 | 36151925 | KD2-H4K8ac_peak_23175 | 5.51783  | LMBRD2_ENSG00000164187;SKP2_ENSG00000145604                                        |
| 5 | 36157533 | 36157740 | KD2-H4K8ac_peak_23176 | 5.57044  |                                                                                    |
| 5 | 36159062 | 36159569 | KD2-H4K8ac_peak_23177 | 5.15777  |                                                                                    |
| 5 | 36241396 | 36242170 | KD2-H4K8ac_peak_23178 | 13.13969 | NADK2_ENSG00000152620                                                              |
| 5 | 36242842 | 36243168 | KD2-H4K8ac_peak_23179 | 13.68542 | NADK2_ENSG00000152620                                                              |
| 5 | 36690197 | 36690572 | KD2-H4K8ac_peak_23180 | 9.89126  |                                                                                    |
| 5 | 36876188 | 36876740 | KD2-H4K8ac_peak_23181 | 10.29842 | NIPBL_ENSG00000164190                                                              |
| 5 | 37249099 | 37249371 | KD2-H4K8ac_peak_23182 | 10.72656 | C5orf42_ENSG00000197603                                                            |

|   |          |          |                       |          |                                                           |
|---|----------|----------|-----------------------|----------|-----------------------------------------------------------|
| 5 | 37249602 | 37250206 | KD2-H4K8ac_peak_23183 | 9.20193  | C5orf42_ENSG00000197603                                   |
| 5 | 37379466 | 37379695 | KD2-H4K8ac_peak_23184 | 6.25869  | WDR70_ENSG00000082068                                     |
| 5 | 38258382 | 38259405 | KD2-H4K8ac_peak_23185 | 5.88845  | EGFLAM_ENSG00000164318                                    |
| 5 | 38317866 | 38318088 | KD2-H4K8ac_peak_23186 | 8.79557  |                                                           |
| 5 | 38556219 | 38556564 | KD2-H4K8ac_peak_23187 | 7.59643  | LIFR-AS1_ENSG00000244968                                  |
| 5 | 39073672 | 39074434 | KD2-H4K8ac_peak_23188 | 10.08707 | RICTOR_ENSG00000164327                                    |
| 5 | 39074682 | 39075218 | KD2-H4K8ac_peak_23189 | 6.99815  | RICTOR_ENSG00000164327                                    |
| 5 | 40755526 | 40755868 | KD2-H4K8ac_peak_23190 | 12.93209 | TTC33_ENSG00000113638                                     |
| 5 | 40798573 | 40798847 | KD2-H4K8ac_peak_23191 | 6.65673  | PRKAA1_ENSG00000132356                                    |
| 5 | 40834949 | 40835256 | KD2-H4K8ac_peak_23192 | 7.67504  | RPL37_ENSG00000145592                                     |
| 5 | 40835560 | 40835913 | KD2-H4K8ac_peak_23193 | 12.17278 | RPL37_ENSG00000145592                                     |
| 5 | 41371631 | 41372007 | KD2-H4K8ac_peak_23194 | 4.70388  |                                                           |
| 5 | 41509732 | 41510226 | KD2-H4K8ac_peak_23195 | 7.22457  | PLCXD3_ENSG00000182836                                    |
| 5 | 41786236 | 41786429 | KD2-H4K8ac_peak_23196 | 6.40683  |                                                           |
| 5 | 41791922 | 41792218 | KD2-H4K8ac_peak_23197 | 11.70505 |                                                           |
| 5 | 41792752 | 41792998 | KD2-H4K8ac_peak_23198 | 5.43522  |                                                           |
| 5 | 41795269 | 41795467 | KD2-H4K8ac_peak_23199 | 5.57044  |                                                           |
| 5 | 41870190 | 41871069 | KD2-H4K8ac_peak_23200 | 16.25886 | OXCT1_ENSG00000083720;OXCT1-AS1_ENSG00000248668           |
| 5 | 41904563 | 41904818 | KD2-H4K8ac_peak_23201 | 5.54647  | C5orf51_ENSG00000205765                                   |
| 5 | 41924964 | 41925938 | KD2-H4K8ac_peak_23202 | 24.58052 | FBXO4_ENSG00000151876                                     |
| 5 | 42757476 | 42757729 | KD2-H4K8ac_peak_23203 | 8.1233   | CCDC152_ENSG00000198865                                   |
| 5 | 43007288 | 43008672 | KD2-H4K8ac_peak_23204 | 7.07117  | CTD-2201E18.5_ENSG00000271788                             |
| 5 | 43009614 | 43010015 | KD2-H4K8ac_peak_23205 | 6.40683  |                                                           |
| 5 | 43066047 | 43066967 | KD2-H4K8ac_peak_23206 | 11.70505 | CTD-2201E18.3_ENSG00000177738;ZNF131_ENSG00000172262      |
| 5 | 43067196 | 43067774 | KD2-H4K8ac_peak_23207 | 14.66631 | CTD-2201E18.3_ENSG00000177738                             |
| 5 | 43120710 | 43121511 | KD2-H4K8ac_peak_23208 | 6.65673  |                                                           |
| 5 | 43121814 | 43122097 | KD2-H4K8ac_peak_23209 | 5.57044  |                                                           |
| 5 | 43311187 | 43311396 | KD2-H4K8ac_peak_23210 | 5.80249  |                                                           |
| 5 | 43483500 | 43483919 | KD2-H4K8ac_peak_23211 | 8.17902  | C5orf28_ENSG00000151881;RP11-159F24.3_ENSG00000249492     |
| 5 | 43484212 | 43484515 | KD2-H4K8ac_peak_23212 | 15.06766 | C5orf28_ENSG00000151881;RP11-159F24.3_ENSG00000249492     |
| 5 | 43521993 | 43522607 | KD2-H4K8ac_peak_23213 | 11.30637 |                                                           |
| 5 | 43556078 | 43557139 | KD2-H4K8ac_peak_23214 | 23.22963 | PAIP1_ENSG00000172239                                     |
| 5 | 43557398 | 43558015 | KD2-H4K8ac_peak_23215 | 8.23274  | PAIP1_ENSG00000172239                                     |
| 5 | 43602746 | 43603574 | KD2-H4K8ac_peak_23216 | 11.05056 | NNT-AS1_ENSG00000248092;NNT_ENSG00000112992               |
| 5 | 44809101 | 44809746 | KD2-H4K8ac_peak_23217 | 9.11031  | RP11-53O19.1_ENSG00000251141;MRPS30_ENSG00000112996       |
| 5 | 49736865 | 49737468 | KD2-H4K8ac_peak_23218 | 5.13615  |                                                           |
| 5 | 49962273 | 49962566 | KD2-H4K8ac_peak_23219 | 6.40683  | PARP8_ENSG00000151883                                     |
| 5 | 49963017 | 49963875 | KD2-H4K8ac_peak_23220 | 13.73635 |                                                           |
| 5 | 50259042 | 50259567 | KD2-H4K8ac_peak_23221 | 6.99815  |                                                           |
| 5 | 50259834 | 50260166 | KD2-H4K8ac_peak_23222 | 11.00314 |                                                           |
| 5 | 50262121 | 50262980 | KD2-H4K8ac_peak_23223 | 9.11031  | CTD-2089N3.1_ENSG00000250360                              |
| 5 | 50264334 | 50264856 | KD2-H4K8ac_peak_23224 | 7.01494  | CTD-2089N3.3_ENSG00000248918                              |
| 5 | 50265077 | 50265902 | KD2-H4K8ac_peak_23225 | 18.94636 | CTD-2089N3.2_ENSG00000251573;CTD-2089N3.3_ENSG00000248918 |
| 5 | 50480981 | 50481198 | KD2-H4K8ac_peak_23226 | 5.16439  |                                                           |
| 5 | 50575725 | 50575951 | KD2-H4K8ac_peak_23227 | 5.25071  |                                                           |
| 5 | 50673180 | 50673586 | KD2-H4K8ac_peak_23228 | 6.16888  |                                                           |

|   |          |          |                       |          |                                                      |
|---|----------|----------|-----------------------|----------|------------------------------------------------------|
| 5 | 50674135 | 50674449 | KD2-H4K8ac_peak_23229 | 4.67342  |                                                      |
| 5 | 50678399 | 50679040 | KD2-H4K8ac_peak_23230 | 11.28831 | CTD-2314G24.2_ENSG00000259663;ISL1_ENSG00000016082   |
| 5 | 50679622 | 50679856 | KD2-H4K8ac_peak_23231 | 6.06203  | CTD-2314G24.2_ENSG00000259663;ISL1_ENSG00000016082   |
| 5 | 50683187 | 50683507 | KD2-H4K8ac_peak_23232 | 6.65673  |                                                      |
| 5 | 50684610 | 50685049 | KD2-H4K8ac_peak_23233 | 7.18916  |                                                      |
| 5 | 50685417 | 50685730 | KD2-H4K8ac_peak_23234 | 13.44374 |                                                      |
| 5 | 50686193 | 50686395 | KD2-H4K8ac_peak_23235 | 12.17278 |                                                      |
| 5 | 50694659 | 50694894 | KD2-H4K8ac_peak_23236 | 8.30974  |                                                      |
| 5 | 50764233 | 50764677 | KD2-H4K8ac_peak_23237 | 7.01964  |                                                      |
| 5 | 51282176 | 51282467 | KD2-H4K8ac_peak_23238 | 9.02371  |                                                      |
| 5 | 51283526 | 51283943 | KD2-H4K8ac_peak_23239 | 7.47462  |                                                      |
| 5 | 51284370 | 51284929 | KD2-H4K8ac_peak_23240 | 9.59147  |                                                      |
| 5 | 51285540 | 51286171 | KD2-H4K8ac_peak_23241 | 7.12754  |                                                      |
| 5 | 51287798 | 51288000 | KD2-H4K8ac_peak_23242 | 5.86783  |                                                      |
| 5 | 51288308 | 51288596 | KD2-H4K8ac_peak_23243 | 13.57066 |                                                      |
| 5 | 51291008 | 51291333 | KD2-H4K8ac_peak_23244 | 5.43522  |                                                      |
| 5 | 51292091 | 51292322 | KD2-H4K8ac_peak_23245 | 7.45501  |                                                      |
| 5 | 51294136 | 51294411 | KD2-H4K8ac_peak_23246 | 5.57044  |                                                      |
| 5 | 51296081 | 51296422 | KD2-H4K8ac_peak_23247 | 9.15329  |                                                      |
| 5 | 51654280 | 51654534 | KD2-H4K8ac_peak_23248 | 9.15329  |                                                      |
| 5 | 51859859 | 51860309 | KD2-H4K8ac_peak_23249 | 4.42765  |                                                      |
| 5 | 52096177 | 52096685 | KD2-H4K8ac_peak_23250 | 7.27716  |                                                      |
| 5 | 52285229 | 52285579 | KD2-H4K8ac_peak_23251 | 13.92307 | CTD-2175A23.1_ENSG00000249899;ITGA2_ENSG00000164171  |
| 5 | 52405799 | 52406186 | KD2-H4K8ac_peak_23252 | 5.01002  | MOCSS2_ENSG00000164172;CTD-2366F13.1_ENSG00000247796 |
| 5 | 53606028 | 53606247 | KD2-H4K8ac_peak_23253 | 4.42765  | ARL15_ENSG00000185305                                |
| 5 | 53606611 | 53606928 | KD2-H4K8ac_peak_23254 | 6.25869  | ARL15_ENSG00000185305                                |
| 5 | 53813650 | 53814248 | KD2-H4K8ac_peak_23255 | 10.19949 | SNX18_ENSG00000178996                                |
| 5 | 54603837 | 54604073 | KD2-H4K8ac_peak_23256 | 9.65086  | DHX29_ENSG00000067248;SKIV2L2_ENSG00000039123        |
| 5 | 54830278 | 54830818 | KD2-H4K8ac_peak_23257 | 13.77586 | PPAP2A_ENSG00000067113                               |
| 5 | 55007846 | 55008118 | KD2-H4K8ac_peak_23258 | 9.65086  |                                                      |
| 5 | 55117662 | 55117855 | KD2-H4K8ac_peak_23259 | 4.33139  |                                                      |
| 5 | 55290477 | 55290737 | KD2-H4K8ac_peak_23260 | 9.95119  | IL6ST_ENSG00000134352;CTD-2031P19.3_ENSG00000227908  |
| 5 | 55310534 | 55310816 | KD2-H4K8ac_peak_23261 | 4.01115  |                                                      |
| 5 | 55567101 | 55567406 | KD2-H4K8ac_peak_23262 | 5.54647  |                                                      |
| 5 | 55569297 | 55569565 | KD2-H4K8ac_peak_23263 | 8.17902  |                                                      |
| 5 | 55776615 | 55778135 | KD2-H4K8ac_peak_23264 | 8.4716   | CTC-236F12.4_ENSG00000248727                         |
| 5 | 55790244 | 55790490 | KD2-H4K8ac_peak_23265 | 8.17902  |                                                      |
| 5 | 56012330 | 56012565 | KD2-H4K8ac_peak_23266 | 4.35346  |                                                      |
| 5 | 56058842 | 56059565 | KD2-H4K8ac_peak_23267 | 9.82729  |                                                      |
| 5 | 56060411 | 56060671 | KD2-H4K8ac_peak_23268 | 4.42765  |                                                      |
| 5 | 56110327 | 56110893 | KD2-H4K8ac_peak_23269 | 4.86324  | MAP3K1_ENSG00000095015                               |
| 5 | 56111375 | 56112935 | KD2-H4K8ac_peak_23270 | 16.8435  | MAP3K1_ENSG00000095015                               |
| 5 | 56131998 | 56132194 | KD2-H4K8ac_peak_23271 | 4.01115  |                                                      |
| 5 | 56205015 | 56205586 | KD2-H4K8ac_peak_23272 | 17.55491 | AC008937.3_ENSG00000225230;SETD9_ENSG00000155542     |
| 5 | 56205937 | 56206332 | KD2-H4K8ac_peak_23273 | 7.47462  | AC008937.3_ENSG00000225230;SETD9_ENSG00000155542     |
| 5 | 56247387 | 56247898 | KD2-H4K8ac_peak_23274 | 20.53952 |                                                      |

|   |          |          |                       |          |                                                       |
|---|----------|----------|-----------------------|----------|-------------------------------------------------------|
| 5 | 56248147 | 56248581 | KD2-H4K8ac_peak_23275 | 9.63487  |                                                       |
| 5 | 56407856 | 56408153 | KD2-H4K8ac_peak_23276 | 8.1233   |                                                       |
| 5 | 56469015 | 56469312 | KD2-H4K8ac_peak_23277 | 9.72244  | GPBP1_ENSG00000062194                                 |
| 5 | 56469734 | 56470522 | KD2-H4K8ac_peak_23278 | 7.36799  | GPBP1_ENSG00000062194                                 |
| 5 | 57373013 | 57373208 | KD2-H4K8ac_peak_23279 | 5.25071  |                                                       |
| 5 | 57756067 | 57756326 | KD2-H4K8ac_peak_23280 | 6.60096  | PLK2_ENSG00000145632                                  |
| 5 | 57877827 | 57878316 | KD2-H4K8ac_peak_23281 | 6.25869  | RAB3C_ENSG00000152932                                 |
| 5 | 57962216 | 57962502 | KD2-H4K8ac_peak_23282 | 5.25071  |                                                       |
| 5 | 58187294 | 58187717 | KD2-H4K8ac_peak_23283 | 6.27931  |                                                       |
| 5 | 58422620 | 58423237 | KD2-H4K8ac_peak_23284 | 7.27716  |                                                       |
| 5 | 58505131 | 58505342 | KD2-H4K8ac_peak_23285 | 5.73839  |                                                       |
| 5 | 58894436 | 58894718 | KD2-H4K8ac_peak_23286 | 6.66692  |                                                       |
| 5 | 58955726 | 58955918 | KD2-H4K8ac_peak_23287 | 9.15329  |                                                       |
| 5 | 58957207 | 58957716 | KD2-H4K8ac_peak_23288 | 6.14257  |                                                       |
| 5 | 59995383 | 59995907 | KD2-H4K8ac_peak_23289 | 10.21366 | DEPDC1B_ENSG00000035499                               |
| 5 | 59996104 | 59996349 | KD2-H4K8ac_peak_23290 | 11.24702 | DEPDC1B_ENSG00000035499                               |
| 5 | 60325491 | 60325740 | KD2-H4K8ac_peak_23291 | 5.73839  |                                                       |
| 5 | 60457820 | 60458021 | KD2-H4K8ac_peak_23292 | 4.42765  | SMIM15_ENSG00000188725;CTC-436P18.1_ENSG00000251279   |
| 5 | 60458437 | 60458908 | KD2-H4K8ac_peak_23293 | 17.17257 | SMIM15_ENSG00000188725;CTC-436P18.1_ENSG00000251279   |
| 5 | 60570956 | 60571179 | KD2-H4K8ac_peak_23294 | 8.66387  |                                                       |
| 5 | 60626683 | 60626952 | KD2-H4K8ac_peak_23295 | 13.13969 |                                                       |
| 5 | 60627196 | 60627462 | KD2-H4K8ac_peak_23296 | 4.06758  | ZSWIM6_ENSG00000130449                                |
| 5 | 60629085 | 60629362 | KD2-H4K8ac_peak_23297 | 5.14125  | ZSWIM6_ENSG00000130449                                |
| 5 | 61601238 | 61601798 | KD2-H4K8ac_peak_23298 | 13.9234  | KIF2A_ENSG00000068796                                 |
| 5 | 61602055 | 61602681 | KD2-H4K8ac_peak_23299 | 6.99815  | KIF2A_ENSG00000068796                                 |
| 5 | 61700092 | 61700380 | KD2-H4K8ac_peak_23300 | 5.61067  | DIMT1_ENSG00000086189;IPO11_ENSG00000086200           |
| 5 | 61708673 | 61708980 | KD2-H4K8ac_peak_23301 | 4.85908  |                                                       |
| 5 | 64064658 | 64065139 | KD2-H4K8ac_peak_23302 | 4.8888   | SREK1IP1_ENSG00000153006;CWC27_ENSG00000153015        |
| 5 | 64330751 | 64331955 | KD2-H4K8ac_peak_23303 | 9.89126  |                                                       |
| 5 | 64357491 | 64357730 | KD2-H4K8ac_peak_23304 | 8.17902  |                                                       |
| 5 | 64398571 | 64399312 | KD2-H4K8ac_peak_23305 | 7.76329  |                                                       |
| 5 | 64778858 | 64779124 | KD2-H4K8ac_peak_23306 | 7.79558  |                                                       |
| 5 | 64919917 | 64920392 | KD2-H4K8ac_peak_23307 | 10.72656 | TRAPPC13_ENSG00000113597;CTC-534A2.2_ENSG00000253251  |
| 5 | 65017587 | 65017860 | KD2-H4K8ac_peak_23308 | 8.66387  | NLN_ENSG00000123213                                   |
| 5 | 65220780 | 65221366 | KD2-H4K8ac_peak_23309 | 12.08081 | CTD-2033C11.1_ENSG00000269961;ERBB2IP_ENSG00000112851 |
| 5 | 65221665 | 65222135 | KD2-H4K8ac_peak_23310 | 17.67328 | CTD-2033C11.1_ENSG00000269961;ERBB2IP_ENSG00000112851 |
| 5 | 65440126 | 65440361 | KD2-H4K8ac_peak_23311 | 8.58725  | AC025442.3_ENSG00000253744                            |
| 5 | 66299645 | 66299945 | KD2-H4K8ac_peak_23312 | 6.40297  | MAST4-AS1_ENSG00000229666                             |
| 5 | 66300675 | 66301150 | KD2-H4K8ac_peak_23313 | 9.15329  | MAST4-AS1_ENSG00000229666                             |
| 5 | 66497807 | 66498001 | KD2-H4K8ac_peak_23314 | 9.23578  |                                                       |
| 5 | 66498743 | 66499034 | KD2-H4K8ac_peak_23315 | 3.96965  |                                                       |
| 5 | 66499253 | 66499709 | KD2-H4K8ac_peak_23316 | 9.41046  |                                                       |
| 5 | 66500667 | 66500987 | KD2-H4K8ac_peak_23317 | 4.98072  |                                                       |
| 5 | 66511407 | 66512024 | KD2-H4K8ac_peak_23318 | 4.06758  |                                                       |
| 5 | 66563207 | 66564040 | KD2-H4K8ac_peak_23319 | 12.08081 | CTD-2187J20.1_ENSG00000251206                         |
| 5 | 66564820 | 66565654 | KD2-H4K8ac_peak_23320 | 4.44527  | CTD-2187J20.1_ENSG00000251206                         |

|   |          |          |                       |          |                                                  |
|---|----------|----------|-----------------------|----------|--------------------------------------------------|
| 5 | 67294656 | 67294884 | KD2-H4K8ac_peak_23321 | 4.77079  |                                                  |
| 5 | 67316274 | 67316542 | KD2-H4K8ac_peak_23322 | 6.64891  |                                                  |
| 5 | 67510944 | 67511393 | KD2-H4K8ac_peak_23323 | 9.11031  | PIK3R1_ENSG00000145675                           |
| 5 | 67533813 | 67534017 | KD2-H4K8ac_peak_23324 | 6.16888  |                                                  |
| 5 | 67545877 | 67546186 | KD2-H4K8ac_peak_23325 | 12.06346 |                                                  |
| 5 | 67552560 | 67553191 | KD2-H4K8ac_peak_23326 | 6.50927  |                                                  |
| 5 | 67555314 | 67555507 | KD2-H4K8ac_peak_23327 | 5.88562  |                                                  |
| 5 | 67583862 | 67584230 | KD2-H4K8ac_peak_23328 | 5.71749  |                                                  |
| 5 | 67584846 | 67585100 | KD2-H4K8ac_peak_23329 | 6.40683  |                                                  |
| 5 | 67702566 | 67702849 | KD2-H4K8ac_peak_23330 | 7.12754  |                                                  |
| 5 | 67724219 | 67724468 | KD2-H4K8ac_peak_23331 | 4.37708  |                                                  |
| 5 | 67829313 | 67829567 | KD2-H4K8ac_peak_23332 | 10.21502 | CTC-537E7.2_ENSG00000248359                      |
| 5 | 67830274 | 67830628 | KD2-H4K8ac_peak_23333 | 7.07117  | CTC-537E7.2_ENSG00000248359                      |
| 5 | 67834437 | 67834675 | KD2-H4K8ac_peak_23334 | 6.00226  |                                                  |
| 5 | 67857146 | 67857426 | KD2-H4K8ac_peak_23335 | 9.15329  |                                                  |
| 5 | 67952943 | 67953234 | KD2-H4K8ac_peak_23336 | 5.43522  |                                                  |
| 5 | 68170798 | 68171010 | KD2-H4K8ac_peak_23337 | 6.66692  |                                                  |
| 5 | 68253274 | 68253514 | KD2-H4K8ac_peak_23338 | 4.77079  |                                                  |
| 5 | 68291200 | 68291494 | KD2-H4K8ac_peak_23339 | 4.42765  |                                                  |
| 5 | 68327356 | 68327639 | KD2-H4K8ac_peak_23340 | 7.27716  |                                                  |
| 5 | 68331175 | 68331429 | KD2-H4K8ac_peak_23341 | 6.00243  |                                                  |
| 5 | 68332505 | 68332737 | KD2-H4K8ac_peak_23342 | 10.72656 |                                                  |
| 5 | 68389210 | 68389535 | KD2-H4K8ac_peak_23343 | 5.88845  | SLC30A5_ENSG00000145740                          |
| 5 | 68389881 | 68390420 | KD2-H4K8ac_peak_23344 | 14.39547 | SLC30A5_ENSG00000145740                          |
| 5 | 68485427 | 68485626 | KD2-H4K8ac_peak_23345 | 11.24702 | CENPH_ENSG00000153044                            |
| 5 | 68513690 | 68513961 | KD2-H4K8ac_peak_23346 | 12.23    | MRPS36_ENSG00000134056                           |
| 5 | 68628302 | 68629398 | KD2-H4K8ac_peak_23347 | 14.56955 | CCDC125_ENSG00000183323;CHCHD2P2_ENSG00000215006 |
| 5 | 68665192 | 68665891 | KD2-H4K8ac_peak_23348 | 8.93954  | TAF9_ENSG00000085231;RAD17_ENSG00000152942       |
| 5 | 68788187 | 68788480 | KD2-H4K8ac_peak_23349 | 5.51783  | OCLN_ENSG00000197822                             |
| 5 | 68789512 | 68789804 | KD2-H4K8ac_peak_23350 | 3.97079  |                                                  |
| 5 | 68855547 | 68855816 | KD2-H4K8ac_peak_23351 | 6.2781   | GTF2H2C_ENSG00000183474                          |
| 5 | 69344948 | 69345205 | KD2-H4K8ac_peak_23352 | 7.12754  | SMN2_ENSG00000205571                             |
| 5 | 70751557 | 70751929 | KD2-H4K8ac_peak_23353 | 7.76329  | BDP1_ENSG00000145734                             |
| 5 | 70881738 | 70882069 | KD2-H4K8ac_peak_23354 | 5.88845  |                                                  |
| 5 | 70882673 | 70882955 | KD2-H4K8ac_peak_23355 | 6.55628  | MCCC2_ENSG00000131844                            |
| 5 | 70883205 | 70883430 | KD2-H4K8ac_peak_23356 | 11.02863 | MCCC2_ENSG00000131844                            |
| 5 | 70989832 | 70990197 | KD2-H4K8ac_peak_23357 | 5.73839  |                                                  |
| 5 | 71361715 | 71361935 | KD2-H4K8ac_peak_23358 | 6.25869  |                                                  |
| 5 | 71402784 | 71403079 | KD2-H4K8ac_peak_23359 | 8.10216  | MAP1B_ENSG00000131711                            |
| 5 | 71403477 | 71404969 | KD2-H4K8ac_peak_23360 | 16.64426 | MAP1B_ENSG00000131711                            |
| 5 | 71461851 | 71462194 | KD2-H4K8ac_peak_23361 | 6.2781   |                                                  |
| 5 | 71603840 | 71604088 | KD2-H4K8ac_peak_23362 | 7.07117  |                                                  |
| 5 | 71616301 | 71616918 | KD2-H4K8ac_peak_23363 | 7.36799  | MRPS27_ENSG00000113048;PTCD2_ENSG00000049883     |
| 5 | 71747866 | 71748205 | KD2-H4K8ac_peak_23364 | 4.77079  |                                                  |
| 5 | 71855344 | 71855543 | KD2-H4K8ac_peak_23365 | 4.49837  |                                                  |
| 5 | 71985524 | 71985729 | KD2-H4K8ac_peak_23366 | 5.19569  |                                                  |



|   |          |          |                       |          |                                                                                 |
|---|----------|----------|-----------------------|----------|---------------------------------------------------------------------------------|
| 5 | 71988377 | 71988723 | KD2-H4K8ac_peak_23367 | 5.16439  |                                                                                 |
| 5 | 72112571 | 72113143 | KD2-H4K8ac_peak_23368 | 12.30509 | CTD-2631K10.1_ENSG00000249085;TNPO1_ENSG00000083312                             |
| 5 | 72251093 | 72251628 | KD2-H4K8ac_peak_23369 | 10.05606 | CTD-237614.1_ENSG00000271926;CTD-237614.2_ENSG00000272081;FCHO2_ENSG00000157107 |
| 5 | 72511962 | 72512325 | KD2-H4K8ac_peak_23370 | 4.86324  |                                                                                 |
| 5 | 72715548 | 72715755 | KD2-H4K8ac_peak_23371 | 8.5781   |                                                                                 |
| 5 | 72793910 | 72794735 | KD2-H4K8ac_peak_23372 | 22.5974  | RP11-79P5.9_ENSG00000272525;BTF3_ENSG00000145741                                |
| 5 | 72860865 | 72861193 | KD2-H4K8ac_peak_23373 | 4.86324  | ANKRA2_ENSG00000164331;UTP15_ENSG00000164338                                    |
| 5 | 73480385 | 73480813 | KD2-H4K8ac_peak_23374 | 6.40683  |                                                                                 |
| 5 | 73729094 | 73729296 | KD2-H4K8ac_peak_23375 | 6.14257  |                                                                                 |
| 5 | 73936174 | 73937101 | KD2-H4K8ac_peak_23376 | 7.81657  | ENC1_ENSG00000171617;HEXB_ENSG00000049860                                       |
| 5 | 73980627 | 73980890 | KD2-H4K8ac_peak_23377 | 5.66705  |                                                                                 |
| 5 | 73981174 | 73981493 | KD2-H4K8ac_peak_23378 | 5.9696   |                                                                                 |
| 5 | 74061852 | 74062120 | KD2-H4K8ac_peak_23379 | 7.01964  | NSA2_ENSG00000164346                                                            |
| 5 | 74062551 | 74062881 | KD2-H4K8ac_peak_23380 | 10.29344 | GFM2_ENSG00000164347;NSA2_ENSG00000164346                                       |
| 5 | 74063119 | 74063568 | KD2-H4K8ac_peak_23381 | 10.72656 | GFM2_ENSG00000164347;NSA2_ENSG00000164346                                       |
| 5 | 74161635 | 74162968 | KD2-H4K8ac_peak_23382 | 14.68449 | FAM169A_ENSG00000198780;CTD-2377O17.1_ENSG00000271714                           |
| 5 | 74348368 | 74348660 | KD2-H4K8ac_peak_23383 | 6.25869  | RP11-229C3.2_ENSG00000250889                                                    |
| 5 | 74531444 | 74531816 | KD2-H4K8ac_peak_23384 | 5.15777  | ANKRD31_ENSG00000145700                                                         |
| 5 | 74532311 | 74532515 | KD2-H4K8ac_peak_23385 | 8.30974  | ANKRD31_ENSG00000145700                                                         |
| 5 | 74629524 | 74630001 | KD2-H4K8ac_peak_23386 | 6.90458  |                                                                                 |
| 5 | 74632300 | 74632598 | KD2-H4K8ac_peak_23387 | 7.22457  | CTD-2235C13.2_ENSG00000247372;HMGCRCR_ENSG00000113161                           |
| 5 | 74952514 | 74952791 | KD2-H4K8ac_peak_23388 | 5.45396  |                                                                                 |
| 5 | 74959462 | 74960335 | KD2-H4K8ac_peak_23389 | 7.27716  |                                                                                 |
| 5 | 74962732 | 74963383 | KD2-H4K8ac_peak_23390 | 9.11031  |                                                                                 |
| 5 | 75013015 | 75013219 | KD2-H4K8ac_peak_23391 | 8.10216  | POC5_ENSG00000152359                                                            |
| 5 | 75013545 | 75014055 | KD2-H4K8ac_peak_23392 | 11.2938  | POC5_ENSG00000152359                                                            |
| 5 | 75327000 | 75327356 | KD2-H4K8ac_peak_23393 | 9.11031  |                                                                                 |
| 5 | 75377722 | 75377952 | KD2-H4K8ac_peak_23394 | 5.57044  |                                                                                 |
| 5 | 75379282 | 75380322 | KD2-H4K8ac_peak_23395 | 10.87093 | CTC-235G5.3_ENSG00000248127;SV2C_ENSG00000122012                                |
| 5 | 75380583 | 75380998 | KD2-H4K8ac_peak_23396 | 10.05606 | CTC-235G5.3_ENSG00000248127                                                     |
| 5 | 75551832 | 75552111 | KD2-H4K8ac_peak_23397 | 9.11818  |                                                                                 |
| 5 | 75668226 | 75668498 | KD2-H4K8ac_peak_23398 | 8.17902  |                                                                                 |
| 5 | 75698817 | 75699459 | KD2-H4K8ac_peak_23399 | 10.08707 | IQGAP2_ENSG00000145703                                                          |
| 5 | 76011106 | 76011379 | KD2-H4K8ac_peak_23400 | 6.42097  | CTD-2384B11.2_ENSG00000225407;F2R_ENSG00000181104                               |
| 5 | 76011966 | 76012298 | KD2-H4K8ac_peak_23401 | 9.51625  | CTD-2384B11.2_ENSG00000225407;F2R_ENSG00000181104                               |
| 5 | 76114860 | 76115272 | KD2-H4K8ac_peak_23402 | 6.35843  | F2RL1_ENSG00000164251                                                           |
| 5 | 76373004 | 76373565 | KD2-H4K8ac_peak_23403 | 9.36516  |                                                                                 |
| 5 | 76382747 | 76382961 | KD2-H4K8ac_peak_23404 | 8.16906  | ZBED3_ENSG00000132846;ZBED3-AS1_ENSG00000250802                                 |
| 5 | 76383749 | 76383987 | KD2-H4K8ac_peak_23405 | 3.69804  | ZBED3_ENSG00000132846                                                           |
| 5 | 76475884 | 76476322 | KD2-H4K8ac_peak_23406 | 5.9696   |                                                                                 |
| 5 | 76651400 | 76651693 | KD2-H4K8ac_peak_23407 | 4.66652  |                                                                                 |
| 5 | 76787838 | 76788046 | KD2-H4K8ac_peak_23408 | 8.85813  |                                                                                 |
| 5 | 76788450 | 76788747 | KD2-H4K8ac_peak_23409 | 8.79557  |                                                                                 |
| 5 | 77071700 | 77071944 | KD2-H4K8ac_peak_23410 | 4.39858  |                                                                                 |
| 5 | 77147171 | 77147989 | KD2-H4K8ac_peak_23411 | 23.33626 |                                                                                 |
| 5 | 77148556 | 77148797 | KD2-H4K8ac_peak_23412 | 9.89126  |                                                                                 |

|   |          |          |                       |          |                                                      |
|---|----------|----------|-----------------------|----------|------------------------------------------------------|
| 5 | 77268457 | 77268777 | KD2-H4K8ac_peak_23413 | 6.85193  |                                                      |
| 5 | 77590809 | 77591727 | KD2-H4K8ac_peak_23414 | 8.30974  | AP3B1_ENSG00000132842                                |
| 5 | 77655426 | 77656184 | KD2-H4K8ac_peak_23415 | 6.25869  | CTD-2037K23.2_ENSG00000245556;SCAMP1_ENSG00000085365 |
| 5 | 77944199 | 77945178 | KD2-H4K8ac_peak_23416 | 11.05467 |                                                      |
| 5 | 77967158 | 77967368 | KD2-H4K8ac_peak_23417 | 7.87794  |                                                      |
| 5 | 78099730 | 78099927 | KD2-H4K8ac_peak_23418 | 7.96322  |                                                      |
| 5 | 78101234 | 78101438 | KD2-H4K8ac_peak_23419 | 6.2159   |                                                      |
| 5 | 78102540 | 78102856 | KD2-H4K8ac_peak_23420 | 4.01115  |                                                      |
| 5 | 78126296 | 78126509 | KD2-H4K8ac_peak_23421 | 4.01115  |                                                      |
| 5 | 78202913 | 78203666 | KD2-H4K8ac_peak_23422 | 6.06203  |                                                      |
| 5 | 78208987 | 78209249 | KD2-H4K8ac_peak_23423 | 9.9302   |                                                      |
| 5 | 78280170 | 78281794 | KD2-H4K8ac_peak_23424 | 18.62998 | ARSB_ENSG00000113273                                 |
| 5 | 78365963 | 78366448 | KD2-H4K8ac_peak_23425 | 7.29632  | BHMT2_ENSG00000132840                                |
| 5 | 78531467 | 78531733 | KD2-H4K8ac_peak_23426 | 5.01002  | DMGDH_ENSG00000132837;JMY_ENSG00000152409            |
| 5 | 78809440 | 78810346 | KD2-H4K8ac_peak_23427 | 21.09577 | HOMER1_ENSG00000152413                               |
| 5 | 78907712 | 78908083 | KD2-H4K8ac_peak_23428 | 15.69572 | PAPD4_ENSG00000164329                                |
| 5 | 78908351 | 78908876 | KD2-H4K8ac_peak_23429 | 6.65673  | PAPD4_ENSG00000164329                                |
| 5 | 79152438 | 79152630 | KD2-H4K8ac_peak_23430 | 5.25071  |                                                      |
| 5 | 79286478 | 79287022 | KD2-H4K8ac_peak_23431 | 11.24702 | MTX3_ENSG00000177034;THBS4_ENSG00000113296           |
| 5 | 79330842 | 79331569 | KD2-H4K8ac_peak_23432 | 11.05467 |                                                      |
| 5 | 79405854 | 79406236 | KD2-H4K8ac_peak_23433 | 10.0692  |                                                      |
| 5 | 79476955 | 79477276 | KD2-H4K8ac_peak_23434 | 7.79898  |                                                      |
| 5 | 79552088 | 79552468 | KD2-H4K8ac_peak_23435 | 8.17902  | SERINC5_ENSG00000164300                              |
| 5 | 79702883 | 79703230 | KD2-H4K8ac_peak_23436 | 8.84031  | ZFYVE16_ENSG00000039319                              |
| 5 | 79703435 | 79703679 | KD2-H4K8ac_peak_23437 | 9.11031  | ZFYVE16_ENSG00000039319                              |
| 5 | 79703892 | 79704219 | KD2-H4K8ac_peak_23438 | 9.89126  | ZFYVE16_ENSG00000039319                              |
| 5 | 79783145 | 79783550 | KD2-H4K8ac_peak_23439 | 4.20044  | CTD-2015H6.3_ENSG00000249042;FAM151B_ENSG00000152380 |
| 5 | 79784040 | 79784239 | KD2-H4K8ac_peak_23440 | 5.02474  | CTD-2015H6.3_ENSG00000249042;FAM151B_ENSG00000152380 |
| 5 | 79950555 | 79950777 | KD2-H4K8ac_peak_23441 | 7.27716  | DHFR_ENSG00000228716;MSH3_ENSG00000113318            |
| 5 | 80256139 | 80256723 | KD2-H4K8ac_peak_23442 | 7.20567  | CTC-459I6.1_ENSG00000251450;RASGRF2_ENSG00000113319  |
| 5 | 80436317 | 80436553 | KD2-H4K8ac_peak_23443 | 3.75035  |                                                      |
| 5 | 80480529 | 80481524 | KD2-H4K8ac_peak_23444 | 10.05606 |                                                      |
| 5 | 80597488 | 80597711 | KD2-H4K8ac_peak_23445 | 11.02863 | CKMT2-AS1_ENSG00000247572;ZCCHC9_ENSG00000131732     |
| 5 | 80874814 | 80875169 | KD2-H4K8ac_peak_23446 | 6.16888  |                                                      |
| 5 | 81047370 | 81048062 | KD2-H4K8ac_peak_23447 | 25.6154  | SSBP2_ENSG00000145687                                |
| 5 | 81145617 | 81145903 | KD2-H4K8ac_peak_23448 | 3.75035  |                                                      |
| 5 | 81146542 | 81147022 | KD2-H4K8ac_peak_23449 | 9.15069  | CTD-2249K22.1_ENSG00000249483                        |
| 5 | 81147244 | 81147596 | KD2-H4K8ac_peak_23450 | 5.01002  | CTD-2249K22.1_ENSG00000249483                        |
| 5 | 81267874 | 81268423 | KD2-H4K8ac_peak_23451 | 16.54484 | ATG10_ENSG00000152348                                |
| 5 | 81573714 | 81574008 | KD2-H4K8ac_peak_23452 | 13.56049 | RPS23_ENSG00000186468                                |
| 5 | 81574717 | 81574949 | KD2-H4K8ac_peak_23453 | 10.86378 | RPS23_ENSG00000186468;ATP6AP1L_ENSG00000205464       |
| 5 | 81683539 | 81683828 | KD2-H4K8ac_peak_23454 | 14.98671 |                                                      |
| 5 | 81684153 | 81684432 | KD2-H4K8ac_peak_23455 | 8.1718   |                                                      |
| 5 | 81692278 | 81692477 | KD2-H4K8ac_peak_23456 | 4.77079  |                                                      |
| 5 | 81832972 | 81833167 | KD2-H4K8ac_peak_23457 | 8.53581  |                                                      |
| 5 | 81833917 | 81834510 | KD2-H4K8ac_peak_23458 | 6.05809  |                                                      |

|   |          |          |                       |          |                                                       |
|---|----------|----------|-----------------------|----------|-------------------------------------------------------|
| 5 | 81834938 | 81835267 | KD2-H4K8ac_peak_23459 | 4.211    |                                                       |
| 5 | 82331075 | 82331322 | KD2-H4K8ac_peak_23460 | 8.94469  |                                                       |
| 5 | 82344658 | 82344854 | KD2-H4K8ac_peak_23461 | 5.25071  |                                                       |
| 5 | 82372816 | 82373131 | KD2-H4K8ac_peak_23462 | 7.27716  | TMEM167A_ENSG00000174695;XRCC4_ENSG00000152422        |
| 5 | 82373494 | 82373745 | KD2-H4K8ac_peak_23463 | 7.36799  | TMEM167A_ENSG00000174695;XRCC4_ENSG00000152422        |
| 5 | 82768246 | 82769080 | KD2-H4K8ac_peak_23464 | 9.36516  | VCAN_ENSG00000038427                                  |
| 5 | 83214751 | 83215110 | KD2-H4K8ac_peak_23465 | 5.25071  |                                                       |
| 5 | 84959059 | 84959394 | KD2-H4K8ac_peak_23466 | 4.86324  | CTC-480C2.1_ENSG00000250874                           |
| 5 | 85865338 | 85865673 | KD2-H4K8ac_peak_23467 | 7.1181   |                                                       |
| 5 | 85913059 | 85913410 | KD2-H4K8ac_peak_23468 | 7.12754  | COX7C_ENSG00000127184                                 |
| 5 | 85913801 | 85914651 | KD2-H4K8ac_peak_23469 | 17.43705 | COX7C_ENSG00000127184                                 |
| 5 | 86563253 | 86563502 | KD2-H4K8ac_peak_23470 | 15.22643 | RASA1_ENSG00000145715                                 |
| 5 | 86808123 | 86808414 | KD2-H4K8ac_peak_23471 | 10.21502 |                                                       |
| 5 | 87564121 | 87564568 | KD2-H4K8ac_peak_23472 | 17.76996 | TMEM161B_ENSG00000164180;TMEM161B-AS1_ENSG00000247828 |
| 5 | 87800114 | 87800314 | KD2-H4K8ac_peak_23473 | 8.1233   |                                                       |
| 5 | 87956248 | 87956629 | KD2-H4K8ac_peak_23474 | 5.54647  |                                                       |
| 5 | 87970154 | 87970681 | KD2-H4K8ac_peak_23475 | 14.06758 |                                                       |
| 5 | 88185204 | 88185600 | KD2-H4K8ac_peak_23476 | 5.53033  |                                                       |
| 5 | 89704768 | 89705509 | KD2-H4K8ac_peak_23477 | 11.05407 | CETN3_ENSG00000153140;AC093510.1_ENSG00000255647      |
| 5 | 89769911 | 89770223 | KD2-H4K8ac_peak_23478 | 8.34752  | MBLAC2_ENSG00000176055                                |
| 5 | 89825091 | 89825364 | KD2-H4K8ac_peak_23479 | 12.00597 | LYSMD3_ENSG00000176018;GPR98_ENSG00000164199          |
| 5 | 90575186 | 90575402 | KD2-H4K8ac_peak_23480 | 9.11031  |                                                       |
| 5 | 90609085 | 90609284 | KD2-H4K8ac_peak_23481 | 3.61633  | LUCAT1_ENSG00000248323;RP11-213H15.4_ENSG00000271762  |
| 5 | 90610593 | 90611047 | KD2-H4K8ac_peak_23482 | 7.74292  | LUCAT1_ENSG00000248323;RP11-213H15.4_ENSG00000271762  |
| 5 | 90647793 | 90648190 | KD2-H4K8ac_peak_23483 | 7.67504  |                                                       |
| 5 | 90676509 | 90676721 | KD2-H4K8ac_peak_23484 | 5.30799  |                                                       |
| 5 | 92757303 | 92757692 | KD2-H4K8ac_peak_23485 | 4.86324  |                                                       |
| 5 | 92914584 | 92914828 | KD2-H4K8ac_peak_23486 | 5.32397  |                                                       |
| 5 | 92915837 | 92916181 | KD2-H4K8ac_peak_23487 | 7.38799  |                                                       |
| 5 | 92919700 | 92920205 | KD2-H4K8ac_peak_23488 | 11.89502 | NR2F1_ENSG00000175745                                 |
| 5 | 92920442 | 92921109 | KD2-H4K8ac_peak_23489 | 9.98013  | NR2F1-AS1_ENSG00000237187                             |
| 5 | 92923469 | 92924113 | KD2-H4K8ac_peak_23490 | 7.76329  |                                                       |
| 5 | 92932681 | 92932873 | KD2-H4K8ac_peak_23491 | 4.7849   |                                                       |
| 5 | 92934362 | 92934677 | KD2-H4K8ac_peak_23492 | 9.15069  |                                                       |
| 5 | 92937793 | 92938467 | KD2-H4K8ac_peak_23493 | 10.21502 |                                                       |
| 5 | 92939625 | 92940141 | KD2-H4K8ac_peak_23494 | 10.21502 |                                                       |
| 5 | 92956599 | 92956835 | KD2-H4K8ac_peak_23495 | 8.4716   | MIR2277_ENSG00000251725                               |
| 5 | 93804900 | 93805189 | KD2-H4K8ac_peak_23496 | 17.14886 |                                                       |
| 5 | 93808240 | 93808436 | KD2-H4K8ac_peak_23497 | 10.08707 |                                                       |
| 5 | 94110531 | 94110746 | KD2-H4K8ac_peak_23498 | 6.16888  |                                                       |
| 5 | 94114084 | 94114315 | KD2-H4K8ac_peak_23499 | 5.57044  |                                                       |
| 5 | 94890912 | 94891132 | KD2-H4K8ac_peak_23500 | 9.65086  | TTC37_ENSG00000198677;ARSK_ENSG00000164291            |
| 5 | 94955612 | 94957374 | KD2-H4K8ac_peak_23501 | 14.8083  | GPR150_ENSG00000178015                                |
| 5 | 95066683 | 95066941 | KD2-H4K8ac_peak_23502 | 6.30229  |                                                       |
| 5 | 95067206 | 95067707 | KD2-H4K8ac_peak_23503 | 7.44324  | CTD-2154I11.2_ENSG00000250240                         |
| 5 | 95296316 | 95296511 | KD2-H4K8ac_peak_23504 | 3.75035  |                                                       |

|   |           |          |                       |          |                                                     |
|---|-----------|----------|-----------------------|----------|-----------------------------------------------------|
| 5 | 95297123  | 95297338 | KD2-H4K8ac_peak_23505 | 6.25869  | ELL2_ENSG00000118985;CTD-2337A12.1_ENSG00000251314  |
| 5 | 96038588  | 96038807 | KD2-H4K8ac_peak_23506 | 7.83656  |                                                     |
| 5 | 96142814  | 96143821 | KD2-H4K8ac_peak_23507 | 13.95627 | ERAP1_ENSG00000164307                               |
| 5 | 96144191  | 96144415 | KD2-H4K8ac_peak_23508 | 6.65673  | ERAP1_ENSG00000164307                               |
| 5 | 96270610  | 96271276 | KD2-H4K8ac_peak_23509 | 6.40297  | LNPEP_ENSG00000113441;CTD-2260A17.2_ENSG00000247121 |
| 5 | 96518932  | 96519285 | KD2-H4K8ac_peak_23510 | 4.9025   | RP11-155G15.2_ENSG00000251513;RIOK2_ENSG00000058729 |
| 5 | 96519752  | 96520186 | KD2-H4K8ac_peak_23511 | 17.91241 | RP11-155G15.2_ENSG00000251513;RIOK2_ENSG00000058729 |
| 5 | 98104513  | 98104770 | KD2-H4K8ac_peak_23512 | 6.45083  | RGMB_ENSG00000174136                                |
| 5 | 98105141  | 98105344 | KD2-H4K8ac_peak_23513 | 5.66705  | RGMB_ENSG00000174136                                |
| 5 | 98263966  | 98264549 | KD2-H4K8ac_peak_23514 | 11.29366 | CTD-2007H13.3_ENSG00000248489                       |
| 5 | 98264966  | 98265281 | KD2-H4K8ac_peak_23515 | 5.84991  | CTD-2007H13.3_ENSG00000248489                       |
| 5 | 101385745 | 1.01E+08 | KD2-H4K8ac_peak_23516 | 4.01115  |                                                     |
| 5 | 101631405 | 1.02E+08 | KD2-H4K8ac_peak_23517 | 6.66359  | SLCO4C1_ENSG00000173930                             |
| 5 | 101632096 | 1.02E+08 | KD2-H4K8ac_peak_23518 | 5.9696   | SLCO4C1_ENSG00000173930                             |
| 5 | 102089808 | 1.02E+08 | KD2-H4K8ac_peak_23519 | 10.21366 | PAM_ENSG00000145730                                 |
| 5 | 102090560 | 1.02E+08 | KD2-H4K8ac_peak_23520 | 14.275   | PAM_ENSG00000145730                                 |
| 5 | 102097840 | 1.02E+08 | KD2-H4K8ac_peak_23521 | 9.15329  |                                                     |
| 5 | 102594597 | 1.03E+08 | KD2-H4K8ac_peak_23522 | 13.20052 | C5orf30_ENSG00000181751                             |
| 5 | 102780251 | 1.03E+08 | KD2-H4K8ac_peak_23523 | 4.77079  |                                                     |
| 5 | 102898229 | 1.03E+08 | KD2-H4K8ac_peak_23524 | 11.05407 | NUDT12_ENSG00000112874                              |
| 5 | 103576831 | 1.04E+08 | KD2-H4K8ac_peak_23525 | 5.57044  |                                                     |
| 5 | 106802226 | 1.07E+08 | KD2-H4K8ac_peak_23526 | 4.89656  |                                                     |
| 5 | 106850581 | 1.07E+08 | KD2-H4K8ac_peak_23527 | 7.146    |                                                     |
| 5 | 106851115 | 1.07E+08 | KD2-H4K8ac_peak_23528 | 10.05606 |                                                     |
| 5 | 107004909 | 1.07E+08 | KD2-H4K8ac_peak_23529 | 5.60968  |                                                     |
| 5 | 107005810 | 1.07E+08 | KD2-H4K8ac_peak_23530 | 17.8868  | EFNA5_ENSG00000184349                               |
| 5 | 107009207 | 1.07E+08 | KD2-H4K8ac_peak_23531 | 5.9696   |                                                     |
| 5 | 107419415 | 1.07E+08 | KD2-H4K8ac_peak_23532 | 5.25071  |                                                     |
| 5 | 107716406 | 1.08E+08 | KD2-H4K8ac_peak_23533 | 9.63487  | FBXL17_ENSG00000145743                              |
| 5 | 108063675 | 1.08E+08 | KD2-H4K8ac_peak_23534 | 8.36432  | LINC01023_ENSG00000272523                           |
| 5 | 108083944 | 1.08E+08 | KD2-H4K8ac_peak_23535 | 13.87818 | FER_ENSG00000151422                                 |
| 5 | 108084691 | 1.08E+08 | KD2-H4K8ac_peak_23536 | 10.43145 |                                                     |
| 5 | 109025673 | 1.09E+08 | KD2-H4K8ac_peak_23537 | 5.405    | MAN2A1_ENSG00000112893                              |
| 5 | 110427328 | 1.1E+08  | KD2-H4K8ac_peak_23538 | 8.37231  | CTC-551A13.2_ENSG00000253613;WDR36_ENSG00000134987  |
| 5 | 110559325 | 1.11E+08 | KD2-H4K8ac_peak_23539 | 15.039   | CAMK4_ENSG00000152495                               |
| 5 | 110560183 | 1.11E+08 | KD2-H4K8ac_peak_23540 | 5.00796  | CAMK4_ENSG00000152495                               |
| 5 | 110571578 | 1.11E+08 | KD2-H4K8ac_peak_23541 | 4.77079  |                                                     |
| 5 | 110720329 | 1.11E+08 | KD2-H4K8ac_peak_23542 | 7.12754  |                                                     |
| 5 | 110721201 | 1.11E+08 | KD2-H4K8ac_peak_23543 | 12.42547 |                                                     |
| 5 | 110722433 | 1.11E+08 | KD2-H4K8ac_peak_23544 | 15.61313 |                                                     |
| 5 | 110789076 | 1.11E+08 | KD2-H4K8ac_peak_23545 | 9.11031  |                                                     |
| 5 | 110868388 | 1.11E+08 | KD2-H4K8ac_peak_23546 | 6.16888  |                                                     |
| 5 | 110886462 | 1.11E+08 | KD2-H4K8ac_peak_23547 | 3.75035  |                                                     |
| 5 | 111017373 | 1.11E+08 | KD2-H4K8ac_peak_23548 | 11.05467 |                                                     |
| 5 | 111093194 | 1.11E+08 | KD2-H4K8ac_peak_23549 | 19.33282 |                                                     |
| 5 | 111094304 | 1.11E+08 | KD2-H4K8ac_peak_23550 | 8.17902  |                                                     |

|   |           |          |                       |          |                                                       |
|---|-----------|----------|-----------------------|----------|-------------------------------------------------------|
| 5 | 111398976 | 1.11E+08 | KD2-H4K8ac_peak_23551 | 5.64449  |                                                       |
| 5 | 111678370 | 1.12E+08 | KD2-H4K8ac_peak_23552 | 9.02371  |                                                       |
| 5 | 111755795 | 1.12E+08 | KD2-H4K8ac_peak_23553 | 6.35843  | EPB41L4A_ENSG00000129595;EPB41L4A-AS2_ENSG00000268358 |
| 5 | 112042788 | 1.12E+08 | KD2-H4K8ac_peak_23554 | 7.70289  | APC_ENSG00000134982                                   |
| 5 | 112043324 | 1.12E+08 | KD2-H4K8ac_peak_23555 | 15.81711 | APC_ENSG00000134982                                   |
| 5 | 112196384 | 1.12E+08 | KD2-H4K8ac_peak_23556 | 5.88845  | CTC-487M23.8_ENSG00000272869;SRP19_ENSG00000153037    |
| 5 | 112197003 | 1.12E+08 | KD2-H4K8ac_peak_23557 | 15.53798 | CTC-487M23.8_ENSG00000272869;SRP19_ENSG00000153037    |
| 5 | 112256971 | 1.12E+08 | KD2-H4K8ac_peak_23558 | 16.09057 | REEP5_ENSG00000129625                                 |
| 5 | 112394029 | 1.12E+08 | KD2-H4K8ac_peak_23559 | 10.30284 |                                                       |
| 5 | 112395266 | 1.12E+08 | KD2-H4K8ac_peak_23560 | 15.13261 |                                                       |
| 5 | 112452770 | 1.12E+08 | KD2-H4K8ac_peak_23561 | 8.41122  |                                                       |
| 5 | 112454537 | 1.12E+08 | KD2-H4K8ac_peak_23562 | 5.75757  |                                                       |
| 5 | 112538774 | 1.13E+08 | KD2-H4K8ac_peak_23563 | 15.10495 |                                                       |
| 5 | 112823710 | 1.13E+08 | KD2-H4K8ac_peak_23564 | 8.10216  | MCC_ENSG00000171444                                   |
| 5 | 112849106 | 1.13E+08 | KD2-H4K8ac_peak_23565 | 18.38518 | YTHDC2_ENSG00000047188                                |
| 5 | 114504834 | 1.15E+08 | KD2-H4K8ac_peak_23566 | 8.98477  |                                                       |
| 5 | 114515085 | 1.15E+08 | KD2-H4K8ac_peak_23567 | 14.84212 | TRIM36_ENSG00000152503                                |
| 5 | 114516108 | 1.15E+08 | KD2-H4K8ac_peak_23568 | 12.82393 | TRIM36_ENSG00000152503                                |
| 5 | 114598209 | 1.15E+08 | KD2-H4K8ac_peak_23569 | 6.25869  | PGGT1B_ENSG00000164219;CTC-428G20.6_ENSG00000271797   |
| 5 | 114599207 | 1.15E+08 | KD2-H4K8ac_peak_23570 | 7.12754  | PGGT1B_ENSG00000164219                                |
| 5 | 114880022 | 1.15E+08 | KD2-H4K8ac_peak_23571 | 14.15075 | FEM1C_ENSG00000145780                                 |
| 5 | 114880755 | 1.15E+08 | KD2-H4K8ac_peak_23572 | 6.40683  | FEM1C_ENSG00000145780                                 |
| 5 | 114961275 | 1.15E+08 | KD2-H4K8ac_peak_23573 | 12.82393 | TICAM2_ENSG00000243414;TMED7-TICAM2_ENSG00000251201   |
| 5 | 115177065 | 1.15E+08 | KD2-H4K8ac_peak_23574 | 8.10216  | ATG12_ENSG00000145782;AP3S1_ENSG00000177879           |
| 5 | 115297459 | 1.15E+08 | KD2-H4K8ac_peak_23575 | 4.211    | AQPEP_ENSG00000172901                                 |
| 5 | 115420444 | 1.15E+08 | KD2-H4K8ac_peak_23576 | 6.65673  | CTD-2287O16.5_ENSG00000271918;COMMD10_ENSG00000145781 |
| 5 | 115912077 | 1.16E+08 | KD2-H4K8ac_peak_23577 | 8.16906  |                                                       |
| 5 | 116074134 | 1.16E+08 | KD2-H4K8ac_peak_23578 | 9.06703  |                                                       |
| 5 | 116640284 | 1.17E+08 | KD2-H4K8ac_peak_23579 | 5.25071  |                                                       |
| 5 | 118323982 | 1.18E+08 | KD2-H4K8ac_peak_23580 | 17.43705 | DTWD2_ENSG00000169570                                 |
| 5 | 118406841 | 1.18E+08 | KD2-H4K8ac_peak_23581 | 8.55271  | CTB-161M19.4_ENSG00000249494                          |
| 5 | 118747466 | 1.19E+08 | KD2-H4K8ac_peak_23582 | 8.1233   |                                                       |
| 5 | 118788231 | 1.19E+08 | KD2-H4K8ac_peak_23583 | 3.75035  | HSD17B4_ENSG00000133835                               |
| 5 | 119799657 | 1.2E+08  | KD2-H4K8ac_peak_23584 | 8.59579  | PRR16_ENSG00000184838                                 |
| 5 | 121296614 | 1.21E+08 | KD2-H4K8ac_peak_23585 | 6.40683  | SRFBP1_ENSG00000151304                                |
| 5 | 121413127 | 1.21E+08 | KD2-H4K8ac_peak_23586 | 4.56666  | LOX_ENSG00000113083                                   |
| 5 | 122110818 | 1.22E+08 | KD2-H4K8ac_peak_23587 | 9.08816  | AC093267.1_ENSG00000212114;SNX2_ENSG00000205302       |
| 5 | 122181002 | 1.22E+08 | KD2-H4K8ac_peak_23588 | 18.62998 |                                                       |
| 5 | 122506471 | 1.23E+08 | KD2-H4K8ac_peak_23589 | 7.12754  |                                                       |
| 5 | 122758624 | 1.23E+08 | KD2-H4K8ac_peak_23590 | 8.34752  | CEP120_ENSG00000168944                                |
| 5 | 122847952 | 1.23E+08 | KD2-H4K8ac_peak_23591 | 17.14886 | CSNK1G3_ENSG00000151292                               |
| 5 | 123121362 | 1.23E+08 | KD2-H4K8ac_peak_23592 | 5.43522  |                                                       |
| 5 | 123149792 | 1.23E+08 | KD2-H4K8ac_peak_23593 | 3.91903  |                                                       |
| 5 | 123211328 | 1.23E+08 | KD2-H4K8ac_peak_23594 | 5.14125  |                                                       |
| 5 | 123392612 | 1.23E+08 | KD2-H4K8ac_peak_23595 | 10.48739 |                                                       |
| 5 | 123461195 | 1.23E+08 | KD2-H4K8ac_peak_23596 | 6.40683  |                                                       |

|   |           |          |                       |          |                                                           |
|---|-----------|----------|-----------------------|----------|-----------------------------------------------------------|
| 5 | 123462763 | 1.23E+08 | KD2-H4K8ac_peak_23597 | 9.15329  |                                                           |
| 5 | 123463935 | 1.23E+08 | KD2-H4K8ac_peak_23598 | 7.83656  |                                                           |
| 5 | 123730425 | 1.24E+08 | KD2-H4K8ac_peak_23599 | 8.26945  | CTC-369A16.2_ENSG00000251421;CTC-369A16.3_ENSG00000251662 |
| 5 | 123731130 | 1.24E+08 | KD2-H4K8ac_peak_23600 | 7.59643  | CTC-369A16.2_ENSG00000251421;CTC-369A16.3_ENSG00000251662 |
| 5 | 123916544 | 1.24E+08 | KD2-H4K8ac_peak_23601 | 10.29344 |                                                           |
| 5 | 123934712 | 1.24E+08 | KD2-H4K8ac_peak_23602 | 6.40683  |                                                           |
| 5 | 123973815 | 1.24E+08 | KD2-H4K8ac_peak_23603 | 6.40683  |                                                           |
| 5 | 123995711 | 1.24E+08 | KD2-H4K8ac_peak_23604 | 5.63633  |                                                           |
| 5 | 124041649 | 1.24E+08 | KD2-H4K8ac_peak_23605 | 4.77079  |                                                           |
| 5 | 124042741 | 1.24E+08 | KD2-H4K8ac_peak_23606 | 13.57066 | RP11-43D2.2_ENSG00000249112                               |
| 5 | 124079321 | 1.24E+08 | KD2-H4K8ac_peak_23607 | 6.39197  |                                                           |
| 5 | 124079810 | 1.24E+08 | KD2-H4K8ac_peak_23608 | 14.68449 |                                                           |
| 5 | 124084836 | 1.24E+08 | KD2-H4K8ac_peak_23609 | 7.13615  | ZNF608_ENSG00000168916                                    |
| 5 | 124085318 | 1.24E+08 | KD2-H4K8ac_peak_23610 | 5.61377  | ZNF608_ENSG00000168916                                    |
| 5 | 124341904 | 1.24E+08 | KD2-H4K8ac_peak_23611 | 4.77079  |                                                           |
| 5 | 124682292 | 1.25E+08 | KD2-H4K8ac_peak_23612 | 5.88845  |                                                           |
| 5 | 124747770 | 1.25E+08 | KD2-H4K8ac_peak_23613 | 6.56211  |                                                           |
| 5 | 124819487 | 1.25E+08 | KD2-H4K8ac_peak_23614 | 4.86824  |                                                           |
| 5 | 124912422 | 1.25E+08 | KD2-H4K8ac_peak_23615 | 4.01115  |                                                           |
| 5 | 125398583 | 1.25E+08 | KD2-H4K8ac_peak_23616 | 7.22936  |                                                           |
| 5 | 125758841 | 1.26E+08 | KD2-H4K8ac_peak_23617 | 10.05606 |                                                           |
| 5 | 125936146 | 1.26E+08 | KD2-H4K8ac_peak_23618 | 11.79585 | PHAX_ENSG00000164902                                      |
| 5 | 125936659 | 1.26E+08 | KD2-H4K8ac_peak_23619 | 19.87796 | PHAX_ENSG00000164902                                      |
| 5 | 126111462 | 1.26E+08 | KD2-H4K8ac_peak_23620 | 6.25869  | RP11-434D11.4_ENSG00000251072;LMNB1_ENSG00000113368       |
| 5 | 126112277 | 1.26E+08 | KD2-H4K8ac_peak_23621 | 7.79558  | RP11-434D11.4_ENSG00000251072;LMNB1_ENSG00000113368       |
| 5 | 126112890 | 1.26E+08 | KD2-H4K8ac_peak_23622 | 11.24702 | RP11-434D11.4_ENSG00000251072;LMNB1_ENSG00000113368       |
| 5 | 126253051 | 1.26E+08 | KD2-H4K8ac_peak_23623 | 7.12754  |                                                           |
| 5 | 126366544 | 1.26E+08 | KD2-H4K8ac_peak_23624 | 5.1628   | MARCH3_ENSG00000173926                                    |
| 5 | 126409065 | 1.26E+08 | KD2-H4K8ac_peak_23625 | 7.1181   | C5orf63_ENSG00000164241                                   |
| 5 | 126565056 | 1.27E+08 | KD2-H4K8ac_peak_23626 | 5.14125  |                                                           |
| 5 | 126852854 | 1.27E+08 | KD2-H4K8ac_peak_23627 | 10.21502 | PRRC1_ENSG00000164244                                     |
| 5 | 127418478 | 1.27E+08 | KD2-H4K8ac_peak_23628 | 18.54875 | SLC12A2_ENSG00000064651;CTC-228N24.3_ENSG00000245937      |
| 5 | 127419115 | 1.27E+08 | KD2-H4K8ac_peak_23629 | 7.95563  | SLC12A2_ENSG00000064651;CTC-228N24.3_ENSG00000245937      |
| 5 | 128300647 | 1.28E+08 | KD2-H4K8ac_peak_23630 | 7.36799  |                                                           |
| 5 | 128399454 | 1.28E+08 | KD2-H4K8ac_peak_23631 | 7.27716  |                                                           |
| 5 | 128429945 | 1.28E+08 | KD2-H4K8ac_peak_23632 | 10.08707 | ISOC1_ENSG00000066583                                     |
| 5 | 128430558 | 1.28E+08 | KD2-H4K8ac_peak_23633 | 8.85813  | ISOC1_ENSG00000066583                                     |
| 5 | 128795344 | 1.29E+08 | KD2-H4K8ac_peak_23634 | 6.25869  | ADAMTS19-AS1_ENSG00000249421;ADAMTS19_ENSG00000145808     |
| 5 | 128796744 | 1.29E+08 | KD2-H4K8ac_peak_23635 | 10.05606 | ADAMTS19-AS1_ENSG00000249421;ADAMTS19_ENSG00000145808     |
| 5 | 130500307 | 1.31E+08 | KD2-H4K8ac_peak_23636 | 12.3187  |                                                           |
| 5 | 130501102 | 1.31E+08 | KD2-H4K8ac_peak_23637 | 4.67342  |                                                           |
| 5 | 130599798 | 1.31E+08 | KD2-H4K8ac_peak_23638 | 9.36516  |                                                           |
| 5 | 130971156 | 1.31E+08 | KD2-H4K8ac_peak_23639 | 11.75669 | RAPGEF6_ENSG00000158987                                   |
| 5 | 131132135 | 1.31E+08 | KD2-H4K8ac_peak_23640 | 10.46264 | CTC-432M15.3_ENSG00000273217;FNIP1_ENSG00000217128        |
| 5 | 131132993 | 1.31E+08 | KD2-H4K8ac_peak_23641 | 6.83936  | CTC-432M15.3_ENSG00000273217;FNIP1_ENSG00000217128        |
| 5 | 131347099 | 1.31E+08 | KD2-H4K8ac_peak_23642 | 7.76104  | ACSL6_ENSG00000164398;AC034228.2_ENSG00000231585          |

|   |           |          |                       |          |                                                                                                            |
|---|-----------|----------|-----------------------|----------|------------------------------------------------------------------------------------------------------------|
| 5 | 131563331 | 1.32E+08 | KD2-H4K8ac_peak_23643 | 17.43705 |                                                                                                            |
| 5 | 131592859 | 1.32E+08 | KD2-H4K8ac_peak_23644 | 13.9234  | PDLIM4_ENSG00000131435                                                                                     |
| 5 | 131593536 | 1.32E+08 | KD2-H4K8ac_peak_23645 | 8.69797  | PDLIM4_ENSG00000131435                                                                                     |
| 5 | 131595088 | 1.32E+08 | KD2-H4K8ac_peak_23646 | 13.73635 |                                                                                                            |
| 5 | 131605234 | 1.32E+08 | KD2-H4K8ac_peak_23647 | 5.13615  |                                                                                                            |
| 5 | 131628819 | 1.32E+08 | KD2-H4K8ac_peak_23648 | 11.50346 | SLC22A4_ENSG00000197208                                                                                    |
| 5 | 131705232 | 1.32E+08 | KD2-H4K8ac_peak_23649 | 9.20193  | AC034220.3_ENSG00000233006;SLC22A5_ENSG00000197375                                                         |
| 5 | 131746054 | 1.32E+08 | KD2-H4K8ac_peak_23650 | 25.44388 | C5orf56_ENSG00000197536                                                                                    |
| 5 | 131755798 | 1.32E+08 | KD2-H4K8ac_peak_23651 | 14.36023 |                                                                                                            |
| 5 | 131825727 | 1.32E+08 | KD2-H4K8ac_peak_23652 | 10.19949 | IRF1_ENSG00000125347                                                                                       |
| 5 | 131826758 | 1.32E+08 | KD2-H4K8ac_peak_23653 | 5.00278  | IRF1_ENSG00000125347                                                                                       |
| 5 | 131830877 | 1.32E+08 | KD2-H4K8ac_peak_23654 | 11.7296  |                                                                                                            |
| 5 | 131862406 | 1.32E+08 | KD2-H4K8ac_peak_23655 | 5.57044  |                                                                                                            |
| 5 | 131887158 | 1.32E+08 | KD2-H4K8ac_peak_23656 | 7.12754  |                                                                                                            |
| 5 | 131892284 | 1.32E+08 | KD2-H4K8ac_peak_23657 | 9.63487  | IL5_ENSG00000113525;RAD50_ENSG00000113522                                                                  |
| 5 | 131892695 | 1.32E+08 | KD2-H4K8ac_peak_23658 | 9.20193  | IL5_ENSG00000113525;RAD50_ENSG00000113522                                                                  |
| 5 | 131991772 | 1.32E+08 | KD2-H4K8ac_peak_23659 | 8.10216  | IL13_ENSG00000169194                                                                                       |
| 5 | 132072807 | 1.32E+08 | KD2-H4K8ac_peak_23660 | 5.9696   | KIF3A_ENSG00000131437                                                                                      |
| 5 | 132073441 | 1.32E+08 | KD2-H4K8ac_peak_23661 | 4.20044  | KIF3A_ENSG00000131437                                                                                      |
| 5 | 132082826 | 1.32E+08 | KD2-H4K8ac_peak_23662 | 11.09936 | CCNI2_ENSG00000205089                                                                                      |
| 5 | 132111936 | 1.32E+08 | KD2-H4K8ac_peak_23663 | 6.24747  |                                                                                                            |
| 5 | 132112410 | 1.32E+08 | KD2-H4K8ac_peak_23664 | 6.40297  |                                                                                                            |
| 5 | 132112964 | 1.32E+08 | KD2-H4K8ac_peak_23665 | 13.73635 |                                                                                                            |
| 5 | 132148918 | 1.32E+08 | KD2-H4K8ac_peak_23666 | 8.37231  | SOWAHA_ENSG00000198944                                                                                     |
| 5 | 132165860 | 1.32E+08 | KD2-H4K8ac_peak_23667 | 20.76319 | SHROOM1_ENSG00000164403                                                                                    |
| 5 | 132166452 | 1.32E+08 | KD2-H4K8ac_peak_23668 | 8.10216  | SHROOM1_ENSG00000164403                                                                                    |
| 5 | 132201584 | 1.32E+08 | KD2-H4K8ac_peak_23669 | 15.25814 | GDF9_ENSG00000164404;UQCQRQ_ENSG00000164405                                                                |
| 5 | 132298609 | 1.32E+08 | KD2-H4K8ac_peak_23670 | 9.89126  | AFF4_ENSG00000072364;CTC-350I8.1_ENSG00000272023                                                           |
| 5 | 132299448 | 1.32E+08 | KD2-H4K8ac_peak_23671 | 11.05467 | AFF4_ENSG00000072364;CTC-350I8.1_ENSG00000272023                                                           |
| 5 | 132361813 | 1.32E+08 | KD2-H4K8ac_peak_23672 | 14.8083  | ZCCHC10_ENSG00000155329                                                                                    |
| 5 | 132386631 | 1.32E+08 | KD2-H4K8ac_peak_23673 | 12.82393 | HSPA4_ENSG00000170606                                                                                      |
| 5 | 132387766 | 1.32E+08 | KD2-H4K8ac_peak_23674 | 8.16906  | HSPA4_ENSG00000170606                                                                                      |
| 5 | 132579843 | 1.33E+08 | KD2-H4K8ac_peak_23675 | 6.40683  | CTB-49A3.5_ENSG00000249478                                                                                 |
| 5 | 133257594 | 1.33E+08 | KD2-H4K8ac_peak_23676 | 7.40111  |                                                                                                            |
| 5 | 133262314 | 1.33E+08 | KD2-H4K8ac_peak_23677 | 9.72244  |                                                                                                            |
| 5 | 133303646 | 1.33E+08 | KD2-H4K8ac_peak_23678 | 10.73134 | C5orf15_ENSG00000113583                                                                                    |
| 5 | 133339802 | 1.33E+08 | KD2-H4K8ac_peak_23679 | 9.16531  | VDAC1_ENSG00000213585;CTB-113I20.2_ENSG00000271737                                                         |
| 5 | 133340589 | 1.33E+08 | KD2-H4K8ac_peak_23680 | 14.69247 | VDAC1_ENSG00000213585;CTB-113I20.2_ENSG00000271737                                                         |
| 5 | 133439872 | 1.33E+08 | KD2-H4K8ac_peak_23681 | 7.96322  |                                                                                                            |
| 5 | 133440901 | 1.33E+08 | KD2-H4K8ac_peak_23682 | 7.47462  |                                                                                                            |
| 5 | 133442315 | 1.33E+08 | KD2-H4K8ac_peak_23683 | 16.61426 |                                                                                                            |
| 5 | 133443593 | 1.33E+08 | KD2-H4K8ac_peak_23684 | 12.00597 |                                                                                                            |
| 5 | 133460419 | 1.33E+08 | KD2-H4K8ac_peak_23685 | 8.58069  |                                                                                                            |
| 5 | 133512683 | 1.34E+08 | KD2-H4K8ac_peak_23686 | 12.57297 | SKP1_ENSG00000113558                                                                                       |
| 5 | 133561336 | 1.34E+08 | KD2-H4K8ac_peak_23687 | 18.37277 | CTD-2410N18.5_ENSG00000272772;PPP2CA_ENSG00000113575;MIR3661_ENSG00000266751;CTD-2410N18.3_ENSG00000270177 |
| 5 | 133562152 | 1.34E+08 | KD2-H4K8ac_peak_23688 | 11.05467 | CTD-2410N18.5_ENSG00000272772;PPP2CA_ENSG00000113575;MIR3661_ENSG00000266751;CTD-2410N18.3_ENSG00000270177 |

|   |           |          |                       |          |                                                                          |
|---|-----------|----------|-----------------------|----------|--------------------------------------------------------------------------|
| 5 | 133702568 | 1.34E+08 | KD2-H4K8ac_peak_23689 | 5.75757  |                                                                          |
| 5 | 133703119 | 1.34E+08 | KD2-H4K8ac_peak_23690 | 8.17902  |                                                                          |
| 5 | 133707290 | 1.34E+08 | KD2-H4K8ac_peak_23691 | 5.59859  | CDKL3_ENSG0000006837;CTD-2410N18.4_ENSG00000273345;UBE2B_ENSG00000119048 |
| 5 | 133747163 | 1.34E+08 | KD2-H4K8ac_peak_23692 | 9.20193  | CDKN2AIPNL_ENSG00000237190                                               |
| 5 | 133747755 | 1.34E+08 | KD2-H4K8ac_peak_23693 | 8.4716   | CDKN2AIPNL_ENSG00000237190                                               |
| 5 | 133801250 | 1.34E+08 | KD2-H4K8ac_peak_23694 | 13.08184 |                                                                          |
| 5 | 133842158 | 1.34E+08 | KD2-H4K8ac_peak_23695 | 5.30494  | AC005355.2_ENSG00000251169                                               |
| 5 | 133859753 | 1.34E+08 | KD2-H4K8ac_peak_23696 | 23.2707  | JADE2_ENSG00000043143                                                    |
| 5 | 133861404 | 1.34E+08 | KD2-H4K8ac_peak_23697 | 11.03331 |                                                                          |
| 5 | 133862318 | 1.34E+08 | KD2-H4K8ac_peak_23698 | 6.24114  |                                                                          |
| 5 | 133888845 | 1.34E+08 | KD2-H4K8ac_peak_23699 | 5.01002  |                                                                          |
| 5 | 133890494 | 1.34E+08 | KD2-H4K8ac_peak_23700 | 10.66719 |                                                                          |
| 5 | 133904697 | 1.34E+08 | KD2-H4K8ac_peak_23701 | 7.1181   |                                                                          |
| 5 | 133922661 | 1.34E+08 | KD2-H4K8ac_peak_23702 | 7.76329  |                                                                          |
| 5 | 133968752 | 1.34E+08 | KD2-H4K8ac_peak_23703 | 4.06758  |                                                                          |
| 5 | 133984572 | 1.34E+08 | KD2-H4K8ac_peak_23704 | 6.99194  | SAR1B_ENSG00000152700;SEC24A_ENSG00000113615                             |
| 5 | 134072891 | 1.34E+08 | KD2-H4K8ac_peak_23705 | 7.76329  | CAMLG_ENSG00000164615                                                    |
| 5 | 134074372 | 1.34E+08 | KD2-H4K8ac_peak_23706 | 7.07117  | CAMLG_ENSG00000164615                                                    |
| 5 | 134093423 | 1.34E+08 | KD2-H4K8ac_peak_23707 | 11.60333 | DDX46_ENSG00000145833                                                    |
| 5 | 134094582 | 1.34E+08 | KD2-H4K8ac_peak_23708 | 5.88845  | DDX46_ENSG00000145833                                                    |
| 5 | 134181701 | 1.34E+08 | KD2-H4K8ac_peak_23709 | 14.275   | C5orf24_ENSG00000181904                                                  |
| 5 | 134209476 | 1.34E+08 | KD2-H4K8ac_peak_23710 | 13.95627 | TXNDC15_ENSG00000113621                                                  |
| 5 | 134240100 | 1.34E+08 | KD2-H4K8ac_peak_23711 | 16.57619 | PCBD2_ENSG00000132570                                                    |
| 5 | 134526801 | 1.35E+08 | KD2-H4K8ac_peak_23712 | 15.61313 |                                                                          |
| 5 | 134734414 | 1.35E+08 | KD2-H4K8ac_peak_23713 | 22.12789 | H2AFY_ENSG00000113648;CTC-203F4.2_ENSG00000270021                        |
| 5 | 135336802 | 1.35E+08 | KD2-H4K8ac_peak_23714 | 6.40683  |                                                                          |
| 5 | 135467795 | 1.35E+08 | KD2-H4K8ac_peak_23715 | 10.96455 | SMAD5_ENSG00000113658                                                    |
| 5 | 135468612 | 1.35E+08 | KD2-H4K8ac_peak_23716 | 11.03331 | SMAD5_ENSG00000113658                                                    |
| 5 | 136515362 | 1.37E+08 | KD2-H4K8ac_peak_23717 | 5.52329  |                                                                          |
| 5 | 136709062 | 1.37E+08 | KD2-H4K8ac_peak_23718 | 10.11379 |                                                                          |
| 5 | 136711370 | 1.37E+08 | KD2-H4K8ac_peak_23719 | 7.18916  |                                                                          |
| 5 | 136834284 | 1.37E+08 | KD2-H4K8ac_peak_23720 | 10.1591  |                                                                          |
| 5 | 136834740 | 1.37E+08 | KD2-H4K8ac_peak_23721 | 11.05407 |                                                                          |
| 5 | 136900247 | 1.37E+08 | KD2-H4K8ac_peak_23722 | 7.79741  |                                                                          |
| 5 | 136901828 | 1.37E+08 | KD2-H4K8ac_peak_23723 | 11.09936 |                                                                          |
| 5 | 136954336 | 1.37E+08 | KD2-H4K8ac_peak_23724 | 4.37709  |                                                                          |
| 5 | 137089565 | 1.37E+08 | KD2-H4K8ac_peak_23725 | 6.24114  | HNRNPA0_ENSG00000177733                                                  |
| 5 | 137090174 | 1.37E+08 | KD2-H4K8ac_peak_23726 | 28.03233 | HNRNPA0_ENSG00000177733                                                  |
| 5 | 137224321 | 1.37E+08 | KD2-H4K8ac_peak_23727 | 8.04448  | RP11-381K20.2_ENSG00000250159;PKD2L2_ENSG00000078795                     |
| 5 | 137368405 | 1.37E+08 | KD2-H4K8ac_peak_23728 | 15.81711 | RP11-325L7.1_ENSG00000246323                                             |
| 5 | 137371983 | 1.37E+08 | KD2-H4K8ac_peak_23729 | 6.83936  |                                                                          |
| 5 | 137475120 | 1.37E+08 | KD2-H4K8ac_peak_23730 | 7.59643  | NME5_ENSG00000112981                                                     |
| 5 | 137549520 | 1.38E+08 | KD2-H4K8ac_peak_23731 | 4.24345  | CDC23_ENSG00000094880                                                    |
| 5 | 137577472 | 1.38E+08 | KD2-H4K8ac_peak_23732 | 14.68449 |                                                                          |
| 5 | 137609779 | 1.38E+08 | KD2-H4K8ac_peak_23733 | 10.05606 | GFRA3_ENSG00000146013                                                    |
| 5 | 137673477 | 1.38E+08 | KD2-H4K8ac_peak_23734 | 11.04256 | CDC25C_ENSG00000158402                                                   |



|   |           |          |                       |          |                               |
|---|-----------|----------|-----------------------|----------|-------------------------------|
| 5 | 137774486 | 1.38E+08 | KD2-H4K8ac_peak_23735 | 7.69287  | REEP2_ENSG00000132563         |
| 5 | 137775856 | 1.38E+08 | KD2-H4K8ac_peak_23736 | 6.66692  |                               |
| 5 | 137784785 | 1.38E+08 | KD2-H4K8ac_peak_23737 | 10.96455 |                               |
| 5 | 137785909 | 1.38E+08 | KD2-H4K8ac_peak_23738 | 13.82493 |                               |
| 5 | 137799479 | 1.38E+08 | KD2-H4K8ac_peak_23739 | 12.30509 |                               |
| 5 | 137826978 | 1.38E+08 | KD2-H4K8ac_peak_23740 | 19.33018 |                               |
| 5 | 137829708 | 1.38E+08 | KD2-H4K8ac_peak_23741 | 3.97079  |                               |
| 5 | 137878310 | 1.38E+08 | KD2-H4K8ac_peak_23742 | 9.63487  | ETF1_ENSG00000120705          |
| 5 | 137910751 | 1.38E+08 | KD2-H4K8ac_peak_23743 | 13.59098 | HSPA9_ENSG00000113013         |
| 5 | 137911598 | 1.38E+08 | KD2-H4K8ac_peak_23744 | 13.80019 | HSPA9_ENSG00000113013         |
| 5 | 137946295 | 1.38E+08 | KD2-H4K8ac_peak_23745 | 18.85772 | CTNNA1_ENSG00000044115        |
| 5 | 138061071 | 1.38E+08 | KD2-H4K8ac_peak_23746 | 7.05051  |                               |
| 5 | 138088542 | 1.38E+08 | KD2-H4K8ac_peak_23747 | 26.59781 | AC034243.1_ENSG00000253404    |
| 5 | 138264280 | 1.38E+08 | KD2-H4K8ac_peak_23748 | 11.6141  |                               |
| 5 | 138281273 | 1.38E+08 | KD2-H4K8ac_peak_23749 | 10.05606 |                               |
| 5 | 138283593 | 1.38E+08 | KD2-H4K8ac_peak_23750 | 6.34074  |                               |
| 5 | 138284234 | 1.38E+08 | KD2-H4K8ac_peak_23751 | 6.31785  |                               |
| 5 | 138284920 | 1.38E+08 | KD2-H4K8ac_peak_23752 | 13.00656 |                               |
| 5 | 138286074 | 1.38E+08 | KD2-H4K8ac_peak_23753 | 9.95119  |                               |
| 5 | 138288357 | 1.38E+08 | KD2-H4K8ac_peak_23754 | 14.12659 |                               |
| 5 | 138289610 | 1.38E+08 | KD2-H4K8ac_peak_23755 | 6.0605   |                               |
| 5 | 138291270 | 1.38E+08 | KD2-H4K8ac_peak_23756 | 6.25869  |                               |
| 5 | 138292151 | 1.38E+08 | KD2-H4K8ac_peak_23757 | 6.36319  |                               |
| 5 | 138515024 | 1.39E+08 | KD2-H4K8ac_peak_23758 | 6.2781   |                               |
| 5 | 138533602 | 1.39E+08 | KD2-H4K8ac_peak_23759 | 7.36799  |                               |
| 5 | 138597982 | 1.39E+08 | KD2-H4K8ac_peak_23760 | 7.45501  |                               |
| 5 | 138629482 | 1.39E+08 | KD2-H4K8ac_peak_23761 | 18.54875 | SIL1_ENSG00000120725          |
| 5 | 138677588 | 1.39E+08 | KD2-H4K8ac_peak_23762 | 21.2844  | PAIP2_ENSG00000120727         |
| 5 | 138739964 | 1.39E+08 | KD2-H4K8ac_peak_23763 | 10.17341 | SPATA24_ENSG00000170469       |
| 5 | 138774911 | 1.39E+08 | KD2-H4K8ac_peak_23764 | 6.66359  |                               |
| 5 | 138775593 | 1.39E+08 | KD2-H4K8ac_peak_23765 | 4.86324  |                               |
| 5 | 138897267 | 1.39E+08 | KD2-H4K8ac_peak_23766 | 13.80019 |                               |
| 5 | 138939989 | 1.39E+08 | KD2-H4K8ac_peak_23767 | 6.40297  |                               |
| 5 | 138940995 | 1.39E+08 | KD2-H4K8ac_peak_23768 | 8.88082  |                               |
| 5 | 139014867 | 1.39E+08 | KD2-H4K8ac_peak_23769 | 5.92591  |                               |
| 5 | 139017213 | 1.39E+08 | KD2-H4K8ac_peak_23770 | 13.13969 |                               |
| 5 | 139027957 | 1.39E+08 | KD2-H4K8ac_peak_23771 | 10.19949 | CTD-3224K15.2_ENSG00000250635 |
| 5 | 139029213 | 1.39E+08 | KD2-H4K8ac_peak_23772 | 6.90231  | CTD-3224K15.2_ENSG00000250635 |
| 5 | 139038950 | 1.39E+08 | KD2-H4K8ac_peak_23773 | 8.85813  |                               |
| 5 | 139040657 | 1.39E+08 | KD2-H4K8ac_peak_23774 | 5.75757  |                               |
| 5 | 139041520 | 1.39E+08 | KD2-H4K8ac_peak_23775 | 6.40297  |                               |
| 5 | 139046818 | 1.39E+08 | KD2-H4K8ac_peak_23776 | 4.0528   |                               |
| 5 | 139047893 | 1.39E+08 | KD2-H4K8ac_peak_23777 | 12.48986 |                               |
| 5 | 139049223 | 1.39E+08 | KD2-H4K8ac_peak_23778 | 8.28234  |                               |
| 5 | 139050908 | 1.39E+08 | KD2-H4K8ac_peak_23779 | 8.23274  |                               |
| 5 | 139056594 | 1.39E+08 | KD2-H4K8ac_peak_23780 | 7.20116  |                               |

|   |           |          |                       |          |                                                                                    |
|---|-----------|----------|-----------------------|----------|------------------------------------------------------------------------------------|
| 5 | 139057964 | 1.39E+08 | KD2-H4K8ac_peak_23781 | 6.36375  |                                                                                    |
| 5 | 139066590 | 1.39E+08 | KD2-H4K8ac_peak_23782 | 4.72599  |                                                                                    |
| 5 | 139076155 | 1.39E+08 | KD2-H4K8ac_peak_23783 | 22.21705 |                                                                                    |
| 5 | 139087176 | 1.39E+08 | KD2-H4K8ac_peak_23784 | 3.7063   |                                                                                    |
| 5 | 139087932 | 1.39E+08 | KD2-H4K8ac_peak_23785 | 8.4716   |                                                                                    |
| 5 | 139089126 | 1.39E+08 | KD2-H4K8ac_peak_23786 | 19.28826 |                                                                                    |
| 5 | 139126076 | 1.39E+08 | KD2-H4K8ac_peak_23787 | 12.08081 | CTB-35F21.2_ENSG00000249131                                                        |
| 5 | 139126973 | 1.39E+08 | KD2-H4K8ac_peak_23788 | 13.59098 |                                                                                    |
| 5 | 139138246 | 1.39E+08 | KD2-H4K8ac_peak_23789 | 9.6247   |                                                                                    |
| 5 | 139145278 | 1.39E+08 | KD2-H4K8ac_peak_23790 | 6.83936  |                                                                                    |
| 5 | 139227537 | 1.39E+08 | KD2-H4K8ac_peak_23791 | 15.69839 | CTB-35F21.4_ENSG00000250692                                                        |
| 5 | 139228018 | 1.39E+08 | KD2-H4K8ac_peak_23792 | 15.47237 | CTB-35F21.4_ENSG00000250692                                                        |
| 5 | 139260328 | 1.39E+08 | KD2-H4K8ac_peak_23793 | 6.8836   |                                                                                    |
| 5 | 139273128 | 1.39E+08 | KD2-H4K8ac_peak_23794 | 6.90231  |                                                                                    |
| 5 | 139421414 | 1.39E+08 | KD2-H4K8ac_peak_23795 | 8.17902  |                                                                                    |
| 5 | 139422076 | 1.39E+08 | KD2-H4K8ac_peak_23796 | 3.75035  | NRG2_ENSG00000158458                                                               |
| 5 | 139423082 | 1.39E+08 | KD2-H4K8ac_peak_23797 | 10.1591  | NRG2_ENSG00000158458                                                               |
| 5 | 139486712 | 1.39E+08 | KD2-H4K8ac_peak_23798 | 11.90231 | LINC01024_ENSG00000245146;PURA_ENSG00000185129                                     |
| 5 | 139493109 | 1.39E+08 | KD2-H4K8ac_peak_23799 | 9.36516  |                                                                                    |
| 5 | 139554121 | 1.4E+08  | KD2-H4K8ac_peak_23800 | 17.00119 | CYSTM1_ENSG00000120306                                                             |
| 5 | 139682373 | 1.4E+08  | KD2-H4K8ac_peak_23801 | 11.66477 | PFDN1_ENSG00000113068                                                              |
| 5 | 139683060 | 1.4E+08  | KD2-H4K8ac_peak_23802 | 8.30974  | PFDN1_ENSG00000113068                                                              |
| 5 | 139742947 | 1.4E+08  | KD2-H4K8ac_peak_23803 | 6.76298  |                                                                                    |
| 5 | 139752963 | 1.4E+08  | KD2-H4K8ac_peak_23804 | 7.79898  |                                                                                    |
| 5 | 139780287 | 1.4E+08  | KD2-H4K8ac_peak_23805 | 10.96455 | CTC-329D1.2_ENSG00000249637;ANKHD1_ENSG00000131503;ANKHD1-EIF4EBP3_ENSG00000254996 |
| 5 | 139781491 | 1.4E+08  | KD2-H4K8ac_peak_23806 | 11.2938  | CTC-329D1.2_ENSG00000249637;ANKHD1_ENSG00000131503;ANKHD1-EIF4EBP3_ENSG00000254996 |
| 5 | 139927399 | 1.4E+08  | KD2-H4K8ac_peak_23807 | 5.92967  | EIF4EBP3_ENSG00000243056                                                           |
| 5 | 139937171 | 1.4E+08  | KD2-H4K8ac_peak_23808 | 17.16047 | SRA1_ENSG00000213523                                                               |
| 5 | 140019150 | 1.4E+08  | KD2-H4K8ac_peak_23809 | 7.28827  | TMCO6_ENSG00000113119                                                              |
| 5 | 140026915 | 1.4E+08  | KD2-H4K8ac_peak_23810 | 6.83936  | NDUFA2_ENSG00000131495;IK_ENSG00000113141;MIR3655_ENSG00000264052                  |
| 5 | 140027454 | 1.4E+08  | KD2-H4K8ac_peak_23811 | 7.26029  | NDUFA2_ENSG00000131495;IK_ENSG00000113141;MIR3655_ENSG00000264052                  |
| 5 | 140043790 | 1.4E+08  | KD2-H4K8ac_peak_23812 | 5.30799  | WDR55_ENSG00000120314                                                              |
| 5 | 140186727 | 1.4E+08  | KD2-H4K8ac_peak_23813 | 7.22457  | PCDHA4_ENSG00000204967                                                             |
| 5 | 140346151 | 1.4E+08  | KD2-H4K8ac_peak_23814 | 8.04448  | PCDHAC2_ENSG00000243232                                                            |
| 5 | 140380995 | 1.4E+08  | KD2-H4K8ac_peak_23815 | 9.89283  |                                                                                    |
| 5 | 140382251 | 1.4E+08  | KD2-H4K8ac_peak_23816 | 6.00226  |                                                                                    |
| 5 | 140700057 | 1.41E+08 | KD2-H4K8ac_peak_23817 | 8.55271  | TAF7_ENSG00000178913;AC005618.1_ENSG00000255729                                    |
| 5 | 140762333 | 1.41E+08 | KD2-H4K8ac_peak_23818 | 8.04763  | PCDHGA7_ENSG00000253537                                                            |
| 5 | 140887631 | 1.41E+08 | KD2-H4K8ac_peak_23819 | 5.13615  |                                                                                    |
| 5 | 140888602 | 1.41E+08 | KD2-H4K8ac_peak_23820 | 9.402    |                                                                                    |
| 5 | 140892171 | 1.41E+08 | KD2-H4K8ac_peak_23821 | 6.20982  |                                                                                    |
| 5 | 140893407 | 1.41E+08 | KD2-H4K8ac_peak_23822 | 8.85813  |                                                                                    |
| 5 | 140898186 | 1.41E+08 | KD2-H4K8ac_peak_23823 | 6.63018  |                                                                                    |
| 5 | 140903660 | 1.41E+08 | KD2-H4K8ac_peak_23824 | 8.1718   |                                                                                    |
| 5 | 140904576 | 1.41E+08 | KD2-H4K8ac_peak_23825 | 4.211    |                                                                                    |
| 5 | 140905181 | 1.41E+08 | KD2-H4K8ac_peak_23826 | 9.1707   |                                                                                    |

|   |           |          |                       |          |                                                  |
|---|-----------|----------|-----------------------|----------|--------------------------------------------------|
| 5 | 140914507 | 1.41E+08 | KD2-H4K8ac_peak_23827 | 9.98013  |                                                  |
| 5 | 140936923 | 1.41E+08 | KD2-H4K8ac_peak_23828 | 9.4551   | CTD-2024I7.13_ENSG00000246422                    |
| 5 | 140939055 | 1.41E+08 | KD2-H4K8ac_peak_23829 | 5.34946  |                                                  |
| 5 | 140939859 | 1.41E+08 | KD2-H4K8ac_peak_23830 | 4.42765  |                                                  |
| 5 | 141030511 | 1.41E+08 | KD2-H4K8ac_peak_23831 | 7.13615  | FCHSD1_ENSG00000197948                           |
| 5 | 141060796 | 1.41E+08 | KD2-H4K8ac_peak_23832 | 8.86099  | ARAP3_ENSG00000120318                            |
| 5 | 141190990 | 1.41E+08 | KD2-H4K8ac_peak_23833 | 11.2938  |                                                  |
| 5 | 141201762 | 1.41E+08 | KD2-H4K8ac_peak_23834 | 5.57044  |                                                  |
| 5 | 141217670 | 1.41E+08 | KD2-H4K8ac_peak_23835 | 4.3437   |                                                  |
| 5 | 141221062 | 1.41E+08 | KD2-H4K8ac_peak_23836 | 8.98093  |                                                  |
| 5 | 141228551 | 1.41E+08 | KD2-H4K8ac_peak_23837 | 20.5798  |                                                  |
| 5 | 141230378 | 1.41E+08 | KD2-H4K8ac_peak_23838 | 16.75834 |                                                  |
| 5 | 141262601 | 1.41E+08 | KD2-H4K8ac_peak_23839 | 7.70289  |                                                  |
| 5 | 141293896 | 1.41E+08 | KD2-H4K8ac_peak_23840 | 6.40297  |                                                  |
| 5 | 141302505 | 1.41E+08 | KD2-H4K8ac_peak_23841 | 16.49944 | KIAA0141_ENSG00000081791                         |
| 5 | 141339867 | 1.41E+08 | KD2-H4K8ac_peak_23842 | 8.74596  |                                                  |
| 5 | 141392175 | 1.41E+08 | KD2-H4K8ac_peak_23843 | 12.08081 | GNPDA1_ENSG00000113552                           |
| 5 | 141443656 | 1.41E+08 | KD2-H4K8ac_peak_23844 | 12.99417 |                                                  |
| 5 | 141487883 | 1.41E+08 | KD2-H4K8ac_peak_23845 | 12.93209 | NDFIP1_ENSG00000131507                           |
| 5 | 141546086 | 1.42E+08 | KD2-H4K8ac_peak_23846 | 4.52326  |                                                  |
| 5 | 141547443 | 1.42E+08 | KD2-H4K8ac_peak_23847 | 7.36933  |                                                  |
| 5 | 141548587 | 1.42E+08 | KD2-H4K8ac_peak_23848 | 7.27716  |                                                  |
| 5 | 141559138 | 1.42E+08 | KD2-H4K8ac_peak_23849 | 19.49525 |                                                  |
| 5 | 141560621 | 1.42E+08 | KD2-H4K8ac_peak_23850 | 12.3187  |                                                  |
| 5 | 141561740 | 1.42E+08 | KD2-H4K8ac_peak_23851 | 7.72801  |                                                  |
| 5 | 141562992 | 1.42E+08 | KD2-H4K8ac_peak_23852 | 4.86324  |                                                  |
| 5 | 141564200 | 1.42E+08 | KD2-H4K8ac_peak_23853 | 4.06758  |                                                  |
| 5 | 141565124 | 1.42E+08 | KD2-H4K8ac_peak_23854 | 11.05407 |                                                  |
| 5 | 141566407 | 1.42E+08 | KD2-H4K8ac_peak_23855 | 10.72656 |                                                  |
| 5 | 141640516 | 1.42E+08 | KD2-H4K8ac_peak_23856 | 6.91644  |                                                  |
| 5 | 141667325 | 1.42E+08 | KD2-H4K8ac_peak_23857 | 4.54006  |                                                  |
| 5 | 141669974 | 1.42E+08 | KD2-H4K8ac_peak_23858 | 5.92967  |                                                  |
| 5 | 141703804 | 1.42E+08 | KD2-H4K8ac_peak_23859 | 6.40683  | AC005592.2_ENSG00000231185                       |
| 5 | 141704859 | 1.42E+08 | KD2-H4K8ac_peak_23860 | 13.1684  | SPRY4_ENSG00000187678;AC005592.2_ENSG00000231185 |
| 5 | 141705468 | 1.42E+08 | KD2-H4K8ac_peak_23861 | 24.1491  | SPRY4_ENSG00000187678;AC005592.2_ENSG00000231185 |
| 5 | 141735611 | 1.42E+08 | KD2-H4K8ac_peak_23862 | 18.94636 |                                                  |
| 5 | 141874541 | 1.42E+08 | KD2-H4K8ac_peak_23863 | 9.8758   |                                                  |
| 5 | 142064050 | 1.42E+08 | KD2-H4K8ac_peak_23864 | 4.70388  |                                                  |
| 5 | 142064603 | 1.42E+08 | KD2-H4K8ac_peak_23865 | 4.44748  |                                                  |
| 5 | 142065445 | 1.42E+08 | KD2-H4K8ac_peak_23866 | 13.80319 |                                                  |
| 5 | 142066237 | 1.42E+08 | KD2-H4K8ac_peak_23867 | 10.1591  |                                                  |
| 5 | 142068159 | 1.42E+08 | KD2-H4K8ac_peak_23868 | 8.45238  |                                                  |
| 5 | 142069050 | 1.42E+08 | KD2-H4K8ac_peak_23869 | 10.58496 |                                                  |
| 5 | 142077057 | 1.42E+08 | KD2-H4K8ac_peak_23870 | 6.00226  | FGF1_ENSG00000113578                             |
| 5 | 142078416 | 1.42E+08 | KD2-H4K8ac_peak_23871 | 5.20908  | FGF1_ENSG00000113578                             |
| 5 | 142092882 | 1.42E+08 | KD2-H4K8ac_peak_23872 | 9.47671  |                                                  |

|   |           |          |                       |          |                                                      |
|---|-----------|----------|-----------------------|----------|------------------------------------------------------|
| 5 | 142189029 | 1.42E+08 | KD2-H4K8ac_peak_23873 | 9.11031  |                                                      |
| 5 | 142782941 | 1.43E+08 | KD2-H4K8ac_peak_23874 | 4.24345  |                                                      |
| 5 | 142784481 | 1.43E+08 | KD2-H4K8ac_peak_23875 | 10.43145 |                                                      |
| 5 | 142813238 | 1.43E+08 | KD2-H4K8ac_peak_23876 | 6.68439  |                                                      |
| 5 | 142814753 | 1.43E+08 | KD2-H4K8ac_peak_23877 | 5.3778   | NR3C1_ENSG00000113580                                |
| 5 | 143265575 | 1.43E+08 | KD2-H4K8ac_peak_23878 | 7.47462  |                                                      |
| 5 | 143397807 | 1.43E+08 | KD2-H4K8ac_peak_23879 | 9.11818  |                                                      |
| 5 | 143407219 | 1.43E+08 | KD2-H4K8ac_peak_23880 | 9.11031  |                                                      |
| 5 | 143411832 | 1.43E+08 | KD2-H4K8ac_peak_23881 | 5.54647  |                                                      |
| 5 | 145214318 | 1.45E+08 | KD2-H4K8ac_peak_23882 | 14.10697 | PRELID2_ENSG00000186314                              |
| 5 | 145561911 | 1.46E+08 | KD2-H4K8ac_peak_23883 | 7.92775  | LARS_ENSG00000133706                                 |
| 5 | 145582689 | 1.46E+08 | KD2-H4K8ac_peak_23884 | 8.59579  | RBM27_ENSG00000091009                                |
| 5 | 145583214 | 1.46E+08 | KD2-H4K8ac_peak_23885 | 6.99815  | RBM27_ENSG00000091009                                |
| 5 | 145826959 | 1.46E+08 | KD2-H4K8ac_peak_23886 | 19.33282 | TCERG1_ENSG00000113649                               |
| 5 | 145945561 | 1.46E+08 | KD2-H4K8ac_peak_23887 | 5.71749  |                                                      |
| 5 | 146614332 | 1.47E+08 | KD2-H4K8ac_peak_23888 | 5.14125  | CTC-255N20.1_ENSG00000250343;STK32A_ENSG00000169302  |
| 5 | 146833678 | 1.47E+08 | KD2-H4K8ac_peak_23889 | 10.65724 |                                                      |
| 5 | 146859525 | 1.47E+08 | KD2-H4K8ac_peak_23890 | 6.57893  |                                                      |
| 5 | 146888653 | 1.47E+08 | KD2-H4K8ac_peak_23891 | 8.85813  | DPYSL3_ENSG00000113657                               |
| 5 | 147699571 | 1.48E+08 | KD2-H4K8ac_peak_23892 | 11.75669 | SPINK9_ENSG00000204909                               |
| 5 | 147763563 | 1.48E+08 | KD2-H4K8ac_peak_23893 | 16.32216 | RP11-373N22.3_ENSG00000247199;FBXO38_ENSG00000145868 |
| 5 | 148033423 | 1.48E+08 | KD2-H4K8ac_peak_23894 | 6.99815  |                                                      |
| 5 | 148205736 | 1.48E+08 | KD2-H4K8ac_peak_23895 | 11.43353 | ADRB2_ENSG00000169252                                |
| 5 | 148331757 | 1.48E+08 | KD2-H4K8ac_peak_23896 | 5.57044  |                                                      |
| 5 | 148651464 | 1.49E+08 | KD2-H4K8ac_peak_23897 | 5.30799  | AFAP1L1_ENSG00000157510                              |
| 5 | 148697151 | 1.49E+08 | KD2-H4K8ac_peak_23898 | 5.54647  |                                                      |
| 5 | 148699901 | 1.49E+08 | KD2-H4K8ac_peak_23899 | 11.89502 |                                                      |
| 5 | 148723970 | 1.49E+08 | KD2-H4K8ac_peak_23900 | 6.05809  | GRPEL2_ENSG00000164284                               |
| 5 | 148725118 | 1.49E+08 | KD2-H4K8ac_peak_23901 | 8.85813  | GRPEL2_ENSG00000164284                               |
| 5 | 148761017 | 1.49E+08 | KD2-H4K8ac_peak_23902 | 7.76329  |                                                      |
| 5 | 148765093 | 1.49E+08 | KD2-H4K8ac_peak_23903 | 9.31907  |                                                      |
| 5 | 148785776 | 1.49E+08 | KD2-H4K8ac_peak_23904 | 11.80497 | MIR143HG_ENSG00000249669;AC131025.8_ENSG00000253864  |
| 5 | 148786308 | 1.49E+08 | KD2-H4K8ac_peak_23905 | 7.83489  | MIR143HG_ENSG00000249669;AC131025.8_ENSG00000253864  |
| 5 | 148786890 | 1.49E+08 | KD2-H4K8ac_peak_23906 | 8.86391  | MIR143HG_ENSG00000249669;AC131025.8_ENSG00000253864  |
| 5 | 148792301 | 1.49E+08 | KD2-H4K8ac_peak_23907 | 5.82869  |                                                      |
| 5 | 148799682 | 1.49E+08 | KD2-H4K8ac_peak_23908 | 9.34195  |                                                      |
| 5 | 148800326 | 1.49E+08 | KD2-H4K8ac_peak_23909 | 13.70605 |                                                      |
| 5 | 148802615 | 1.49E+08 | KD2-H4K8ac_peak_23910 | 13.81781 |                                                      |
| 5 | 148930643 | 1.49E+08 | KD2-H4K8ac_peak_23911 | 10.17341 | CSNK1A1_ENSG00000113712;ARHGFEF37_ENSG00000183111    |
| 5 | 148960571 | 1.49E+08 | KD2-H4K8ac_peak_23912 | 16.57619 |                                                      |
| 5 | 149026293 | 1.49E+08 | KD2-H4K8ac_peak_23913 | 10.21502 |                                                      |
| 5 | 149109951 | 1.49E+08 | KD2-H4K8ac_peak_23914 | 6.25869  | PPARGC1B_ENSG00000155846                             |
| 5 | 149185759 | 1.49E+08 | KD2-H4K8ac_peak_23915 | 7.146    |                                                      |
| 5 | 149339780 | 1.49E+08 | KD2-H4K8ac_peak_23916 | 12.23    | SLC26A2_ENSG00000155850                              |
| 5 | 149340370 | 1.49E+08 | KD2-H4K8ac_peak_23917 | 9.73431  | SLC26A2_ENSG00000155850                              |
| 5 | 149379703 | 1.49E+08 | KD2-H4K8ac_peak_23918 | 6.84261  | TIGD6_ENSG00000164296;HMGXB3_ENSG00000113716         |

|   |           |          |                       |          |                                                    |
|---|-----------|----------|-----------------------|----------|----------------------------------------------------|
| 5 | 149380308 | 1.49E+08 | KD2-H4K8ac_peak_23919 | 9.61895  | TIGD6_ENSG00000164296;HMGXB3_ENSG00000113716       |
| 5 | 149492093 | 1.49E+08 | KD2-H4K8ac_peak_23920 | 4.62142  | CSF1R_ENSG00000182578                              |
| 5 | 149517831 | 1.5E+08  | KD2-H4K8ac_peak_23921 | 3.97079  |                                                    |
| 5 | 149518583 | 1.5E+08  | KD2-H4K8ac_peak_23922 | 5.92591  |                                                    |
| 5 | 149519806 | 1.5E+08  | KD2-H4K8ac_peak_23923 | 5.63186  |                                                    |
| 5 | 149523157 | 1.5E+08  | KD2-H4K8ac_peak_23924 | 5.71781  |                                                    |
| 5 | 149526676 | 1.5E+08  | KD2-H4K8ac_peak_23925 | 5.14125  |                                                    |
| 5 | 149533372 | 1.5E+08  | KD2-H4K8ac_peak_23926 | 8.2413   |                                                    |
| 5 | 149535087 | 1.5E+08  | KD2-H4K8ac_peak_23927 | 8.4716   | PDGFRB_ENSG00000113721                             |
| 5 | 149535663 | 1.5E+08  | KD2-H4K8ac_peak_23928 | 6.16103  | PDGFRB_ENSG00000113721                             |
| 5 | 149536877 | 1.5E+08  | KD2-H4K8ac_peak_23929 | 12.79505 |                                                    |
| 5 | 149538182 | 1.5E+08  | KD2-H4K8ac_peak_23930 | 7.95563  |                                                    |
| 5 | 149539405 | 1.5E+08  | KD2-H4K8ac_peak_23931 | 8.85813  |                                                    |
| 5 | 149660231 | 1.5E+08  | KD2-H4K8ac_peak_23932 | 4.01115  |                                                    |
| 5 | 149696982 | 1.5E+08  | KD2-H4K8ac_peak_23933 | 6.85193  |                                                    |
| 5 | 149737308 | 1.5E+08  | KD2-H4K8ac_peak_23934 | 9.20193  | TCOF1_ENSG00000070814                              |
| 5 | 149789688 | 1.5E+08  | KD2-H4K8ac_peak_23935 | 10.72656 |                                                    |
| 5 | 149828937 | 1.5E+08  | KD2-H4K8ac_peak_23936 | 5.13615  | RPS14_ENSG00000164587                              |
| 5 | 149837718 | 1.5E+08  | KD2-H4K8ac_peak_23937 | 5.42867  |                                                    |
| 5 | 149864857 | 1.5E+08  | KD2-H4K8ac_peak_23938 | 19.55721 | CTC-367J11.1_ENSG00000254333;NDST1_ENSG00000070614 |
| 5 | 149883416 | 1.5E+08  | KD2-H4K8ac_peak_23939 | 6.15399  |                                                    |
| 5 | 149891603 | 1.5E+08  | KD2-H4K8ac_peak_23940 | 4.36736  |                                                    |
| 5 | 149950670 | 1.5E+08  | KD2-H4K8ac_peak_23941 | 7.27716  |                                                    |
| 5 | 149953913 | 1.5E+08  | KD2-H4K8ac_peak_23942 | 20.47312 |                                                    |
| 5 | 149962007 | 1.5E+08  | KD2-H4K8ac_peak_23943 | 9.36516  |                                                    |
| 5 | 149963195 | 1.5E+08  | KD2-H4K8ac_peak_23944 | 4.06758  |                                                    |
| 5 | 149964196 | 1.5E+08  | KD2-H4K8ac_peak_23945 | 7.47462  |                                                    |
| 5 | 149969737 | 1.5E+08  | KD2-H4K8ac_peak_23946 | 10.17486 |                                                    |
| 5 | 149970494 | 1.5E+08  | KD2-H4K8ac_peak_23947 | 9.65086  |                                                    |
| 5 | 149972124 | 1.5E+08  | KD2-H4K8ac_peak_23948 | 4.89359  |                                                    |
| 5 | 149973728 | 1.5E+08  | KD2-H4K8ac_peak_23949 | 5.14125  |                                                    |
| 5 | 149975449 | 1.5E+08  | KD2-H4K8ac_peak_23950 | 10.23436 |                                                    |
| 5 | 149977566 | 1.5E+08  | KD2-H4K8ac_peak_23951 | 7.59183  |                                                    |
| 5 | 149978397 | 1.5E+08  | KD2-H4K8ac_peak_23952 | 5.10665  |                                                    |
| 5 | 149979701 | 1.5E+08  | KD2-H4K8ac_peak_23953 | 13.87818 | SYNPO_ENSG00000171992                              |
| 5 | 149980636 | 1.5E+08  | KD2-H4K8ac_peak_23954 | 13.92465 | SYNPO_ENSG00000171992                              |
| 5 | 149994914 | 1.5E+08  | KD2-H4K8ac_peak_23955 | 6.76298  | CTB-140J7.2_ENSG00000253852                        |
| 5 | 149997950 | 1.5E+08  | KD2-H4K8ac_peak_23956 | 9.20193  |                                                    |
| 5 | 150004502 | 1.5E+08  | KD2-H4K8ac_peak_23957 | 6.99815  |                                                    |
| 5 | 150024530 | 1.5E+08  | KD2-H4K8ac_peak_23958 | 7.22919  |                                                    |
| 5 | 150035828 | 1.5E+08  | KD2-H4K8ac_peak_23959 | 26.05481 |                                                    |
| 5 | 150051052 | 1.5E+08  | KD2-H4K8ac_peak_23960 | 19.33018 | CTC-345K18.2_ENSG00000250309                       |
| 5 | 150080187 | 1.5E+08  | KD2-H4K8ac_peak_23961 | 26.77453 | RBM22_ENSG00000086589                              |
| 5 | 150137729 | 1.5E+08  | KD2-H4K8ac_peak_23962 | 5.57044  | DCTN4_ENSG00000132912                              |
| 5 | 150138365 | 1.5E+08  | KD2-H4K8ac_peak_23963 | 9.34195  | DCTN4_ENSG00000132912                              |
| 5 | 150158108 | 1.5E+08  | KD2-H4K8ac_peak_23964 | 5.30799  | SMIM3_ENSG00000256235;AC010441.1_ENSG00000269636   |

|   |           |          |                       |          |                                                   |
|---|-----------|----------|-----------------------|----------|---------------------------------------------------|
| 5 | 150460325 | 1.5E+08  | KD2-H4K8ac_peak_23965 | 15.57998 |                                                   |
| 5 | 150536842 | 1.51E+08 | KD2-H4K8ac_peak_23966 | 7.0754   | ANXA6_ENSG00000197043;CTB-17P3.4_ENSG00000254298  |
| 5 | 150827195 | 1.51E+08 | KD2-H4K8ac_peak_23967 | 13.21979 |                                                   |
| 5 | 151066352 | 1.51E+08 | KD2-H4K8ac_peak_23968 | 6.83936  | SPARC_ENSG00000113140                             |
| 5 | 151138387 | 1.51E+08 | KD2-H4K8ac_peak_23969 | 4.37815  |                                                   |
| 5 | 151150356 | 1.51E+08 | KD2-H4K8ac_peak_23970 | 15.16343 | G3BP1_ENSG00000145907                             |
| 5 | 151151934 | 1.51E+08 | KD2-H4K8ac_peak_23971 | 8.02571  | ATOX1_ENSG00000177556                             |
| 5 | 153418222 | 1.53E+08 | KD2-H4K8ac_peak_23972 | 11.70505 | FAM114A2_ENSG00000055147;MFAP3_ENSG00000037749    |
| 5 | 153569444 | 1.54E+08 | KD2-H4K8ac_peak_23973 | 11.92978 | GALNT10_ENSG00000164574                           |
| 5 | 153596973 | 1.54E+08 | KD2-H4K8ac_peak_23974 | 6.9809   |                                                   |
| 5 | 153825680 | 1.54E+08 | KD2-H4K8ac_peak_23975 | 6.60096  | SAP30L-AS1_ENSG00000245275;SAP30L_ENSG00000164576 |
| 5 | 153847658 | 1.54E+08 | KD2-H4K8ac_peak_23976 | 7.1181   |                                                   |
| 5 | 153849760 | 1.54E+08 | KD2-H4K8ac_peak_23977 | 4.42498  |                                                   |
| 5 | 153853248 | 1.54E+08 | KD2-H4K8ac_peak_23978 | 11.55418 |                                                   |
| 5 | 153854057 | 1.54E+08 | KD2-H4K8ac_peak_23979 | 7.73418  |                                                   |
| 5 | 153855103 | 1.54E+08 | KD2-H4K8ac_peak_23980 | 7.40111  |                                                   |
| 5 | 153856930 | 1.54E+08 | KD2-H4K8ac_peak_23981 | 7.92775  | HAND1_ENSG00000113196                             |
| 5 | 153858228 | 1.54E+08 | KD2-H4K8ac_peak_23982 | 4.36736  | HAND1_ENSG00000113196                             |
| 5 | 153862405 | 1.54E+08 | KD2-H4K8ac_peak_23983 | 4.44527  |                                                   |
| 5 | 153863468 | 1.54E+08 | KD2-H4K8ac_peak_23984 | 11.24702 |                                                   |
| 5 | 153864058 | 1.54E+08 | KD2-H4K8ac_peak_23985 | 9.20193  |                                                   |
| 5 | 153865158 | 1.54E+08 | KD2-H4K8ac_peak_23986 | 7.47462  | CTB-158E9.1_ENSG00000254293                       |
| 5 | 153874685 | 1.54E+08 | KD2-H4K8ac_peak_23987 | 6.40683  |                                                   |
| 5 | 153884717 | 1.54E+08 | KD2-H4K8ac_peak_23988 | 14.12659 |                                                   |
| 5 | 153885462 | 1.54E+08 | KD2-H4K8ac_peak_23989 | 12.57297 |                                                   |
| 5 | 153890348 | 1.54E+08 | KD2-H4K8ac_peak_23990 | 6.0073   |                                                   |
| 5 | 153894349 | 1.54E+08 | KD2-H4K8ac_peak_23991 | 6.56211  |                                                   |
| 5 | 153895384 | 1.54E+08 | KD2-H4K8ac_peak_23992 | 6.8836   |                                                   |
| 5 | 153895840 | 1.54E+08 | KD2-H4K8ac_peak_23993 | 9.11031  |                                                   |
| 5 | 153897119 | 1.54E+08 | KD2-H4K8ac_peak_23994 | 14.8083  |                                                   |
| 5 | 153898548 | 1.54E+08 | KD2-H4K8ac_peak_23995 | 15.22643 |                                                   |
| 5 | 153900704 | 1.54E+08 | KD2-H4K8ac_peak_23996 | 7.95934  |                                                   |
| 5 | 153901303 | 1.54E+08 | KD2-H4K8ac_peak_23997 | 10.96455 |                                                   |
| 5 | 153902479 | 1.54E+08 | KD2-H4K8ac_peak_23998 | 14.98671 |                                                   |
| 5 | 153903587 | 1.54E+08 | KD2-H4K8ac_peak_23999 | 14.72959 |                                                   |
| 5 | 153904328 | 1.54E+08 | KD2-H4K8ac_peak_24000 | 5.61067  |                                                   |
| 5 | 153905876 | 1.54E+08 | KD2-H4K8ac_peak_24001 | 7.64093  |                                                   |
| 5 | 153921138 | 1.54E+08 | KD2-H4K8ac_peak_24002 | 8.00457  |                                                   |
| 5 | 153948577 | 1.54E+08 | KD2-H4K8ac_peak_24003 | 7.11925  |                                                   |
| 5 | 153967211 | 1.54E+08 | KD2-H4K8ac_peak_24004 | 8.17902  |                                                   |
| 5 | 153975438 | 1.54E+08 | KD2-H4K8ac_peak_24005 | 6.56926  | MIR3141_ENSG00000264760                           |
| 5 | 153988812 | 1.54E+08 | KD2-H4K8ac_peak_24006 | 5.08628  |                                                   |
| 5 | 153990123 | 1.54E+08 | KD2-H4K8ac_peak_24007 | 9.11891  |                                                   |
| 5 | 154061723 | 1.54E+08 | KD2-H4K8ac_peak_24008 | 5.30799  |                                                   |
| 5 | 154062587 | 1.54E+08 | KD2-H4K8ac_peak_24009 | 13.88933 |                                                   |
| 5 | 154134192 | 1.54E+08 | KD2-H4K8ac_peak_24010 | 10.29842 |                                                   |

|   |           |          |                       |          |                                                     |
|---|-----------|----------|-----------------------|----------|-----------------------------------------------------|
| 5 | 154134938 | 1.54E+08 | KD2-H4K8ac_peak_24011 | 13.36684 |                                                     |
| 5 | 154194005 | 1.54E+08 | KD2-H4K8ac_peak_24012 | 5.29352  |                                                     |
| 5 | 154214200 | 1.54E+08 | KD2-H4K8ac_peak_24013 | 4.8888   |                                                     |
| 5 | 154236275 | 1.54E+08 | KD2-H4K8ac_peak_24014 | 11.55418 | CNOT8_ENSG00000155508                               |
| 5 | 154317224 | 1.54E+08 | KD2-H4K8ac_peak_24015 | 4.37815  | GEMIN5_ENSG00000082516                              |
| 5 | 154317891 | 1.54E+08 | KD2-H4K8ac_peak_24016 | 6.85193  | GEMIN5_ENSG00000082516                              |
| 5 | 154320432 | 1.54E+08 | KD2-H4K8ac_peak_24017 | 6.65673  | MRPL22_ENSG00000082515                              |
| 5 | 155754029 | 1.56E+08 | KD2-H4K8ac_peak_24018 | 4.77079  |                                                     |
| 5 | 156569430 | 1.57E+08 | KD2-H4K8ac_peak_24019 | 12.84642 | HAVCR2_ENSG00000135077;ITK_ENSG00000113263          |
| 5 | 156570363 | 1.57E+08 | KD2-H4K8ac_peak_24020 | 8.25022  | HAVCR2_ENSG00000135077;ITK_ENSG00000113263          |
| 5 | 156692704 | 1.57E+08 | KD2-H4K8ac_peak_24021 | 5.84991  | CTC-248O19.1_ENSG00000253653;CYFIP2_ENSG00000055163 |
| 5 | 156693148 | 1.57E+08 | KD2-H4K8ac_peak_24022 | 8.16906  | CTC-248O19.1_ENSG00000253653;CYFIP2_ENSG00000055163 |
| 5 | 156811345 | 1.57E+08 | KD2-H4K8ac_peak_24023 | 10.05606 | CTB-47B11.3_ENSG00000248544                         |
| 5 | 156814784 | 1.57E+08 | KD2-H4K8ac_peak_24024 | 10.58016 |                                                     |
| 5 | 156870506 | 1.57E+08 | KD2-H4K8ac_peak_24025 | 5.14125  |                                                     |
| 5 | 156871418 | 1.57E+08 | KD2-H4K8ac_peak_24026 | 5.29555  |                                                     |
| 5 | 156876618 | 1.57E+08 | KD2-H4K8ac_peak_24027 | 3.75035  |                                                     |
| 5 | 156886964 | 1.57E+08 | KD2-H4K8ac_peak_24028 | 12.30509 | CTB-109A12.1_ENSG00000251405;NIPAL4_ENSG00000172548 |
| 5 | 157002345 | 1.57E+08 | KD2-H4K8ac_peak_24029 | 11.05467 | ADAM19_ENSG00000135074                              |
| 5 | 157098626 | 1.57E+08 | KD2-H4K8ac_peak_24030 | 5.71749  | SOX30_ENSG00000039600;C5orf52_ENSG00000187658       |
| 5 | 157145788 | 1.57E+08 | KD2-H4K8ac_peak_24031 | 6.66692  |                                                     |
| 5 | 157285544 | 1.57E+08 | KD2-H4K8ac_peak_24032 | 17.14886 | CLINT1_ENSG00000113282                              |
| 5 | 157376092 | 1.57E+08 | KD2-H4K8ac_peak_24033 | 6.06203  |                                                     |
| 5 | 157388079 | 1.57E+08 | KD2-H4K8ac_peak_24034 | 5.57044  |                                                     |
| 5 | 157910469 | 1.58E+08 | KD2-H4K8ac_peak_24035 | 6.40683  |                                                     |
| 5 | 158448342 | 1.58E+08 | KD2-H4K8ac_peak_24036 | 8.26945  |                                                     |
| 5 | 158522139 | 1.59E+08 | KD2-H4K8ac_peak_24037 | 10.19949 |                                                     |
| 5 | 158527837 | 1.59E+08 | KD2-H4K8ac_peak_24038 | 4.03256  | RP11-175K6.1_ENSG00000245812                        |
| 5 | 158635975 | 1.59E+08 | KD2-H4K8ac_peak_24039 | 7.47462  | RNF145_ENSG00000145860;CTB-11I22.1_ENSG00000253256  |
| 5 | 158636675 | 1.59E+08 | KD2-H4K8ac_peak_24040 | 6.66692  | RNF145_ENSG00000145860;CTB-11I22.1_ENSG00000253256  |
| 5 | 158689643 | 1.59E+08 | KD2-H4K8ac_peak_24041 | 11.89502 | UBLCP1_ENSG00000164332                              |
| 5 | 158758538 | 1.59E+08 | KD2-H4K8ac_peak_24042 | 17.17257 | IL12B_ENSG00000113302                               |
| 5 | 159435528 | 1.59E+08 | KD2-H4K8ac_peak_24043 | 11.1952  | Y_RNA_ENSG00000199398;TTC1_ENSG00000113312          |
| 5 | 159545954 | 1.6E+08  | KD2-H4K8ac_peak_24044 | 16.8435  | PWWP2A_ENSG00000170234                              |
| 5 | 159591386 | 1.6E+08  | KD2-H4K8ac_peak_24045 | 14.63458 |                                                     |
| 5 | 159626420 | 1.6E+08  | KD2-H4K8ac_peak_24046 | 15.57998 |                                                     |
| 5 | 159714040 | 1.6E+08  | KD2-H4K8ac_peak_24047 | 5.72327  |                                                     |
| 5 | 159738708 | 1.6E+08  | KD2-H4K8ac_peak_24048 | 14.66631 |                                                     |
| 5 | 159743119 | 1.6E+08  | KD2-H4K8ac_peak_24049 | 7.59643  |                                                     |
| 5 | 159771938 | 1.6E+08  | KD2-H4K8ac_peak_24050 | 15.22643 | CCNJL_ENSG00000135083                               |
| 5 | 159797375 | 1.6E+08  | KD2-H4K8ac_peak_24051 | 4.42765  | C1QTNF2_ENSG00000145861                             |
| 5 | 159826784 | 1.6E+08  | KD2-H4K8ac_peak_24052 | 13.73635 | C5orf54_ENSG00000221886                             |
| 5 | 162886702 | 1.63E+08 | KD2-H4K8ac_peak_24053 | 9.36516  | NUDCD2_ENSG00000170584;HMMR_ENSG00000072571         |
| 5 | 162887720 | 1.63E+08 | KD2-H4K8ac_peak_24054 | 7.48133  | NUDCD2_ENSG00000170584;HMMR_ENSG00000072571         |
| 5 | 162930895 | 1.63E+08 | KD2-H4K8ac_peak_24055 | 8.88549  | MAT2B_ENSG00000038274                               |
| 5 | 162931317 | 1.63E+08 | KD2-H4K8ac_peak_24056 | 5.54647  |                                                     |

|   |           |          |                       |          |                             |
|---|-----------|----------|-----------------------|----------|-----------------------------|
| 5 | 163087143 | 1.63E+08 | KD2-H4K8ac_peak_24057 | 11.70505 |                             |
| 5 | 164008366 | 1.64E+08 | KD2-H4K8ac_peak_24058 | 5.14125  |                             |
| 5 | 167589251 | 1.68E+08 | KD2-H4K8ac_peak_24059 | 11.03331 |                             |
| 5 | 167589900 | 1.68E+08 | KD2-H4K8ac_peak_24060 | 8.23274  |                             |
| 5 | 167605011 | 1.68E+08 | KD2-H4K8ac_peak_24061 | 5.92591  |                             |
| 5 | 167718336 | 1.68E+08 | KD2-H4K8ac_peak_24062 | 5.75757  | WWC1_ENSG00000113645        |
| 5 | 167912929 | 1.68E+08 | KD2-H4K8ac_peak_24063 | 10.1591  | RARS_ENSG00000113643        |
| 5 | 167913542 | 1.68E+08 | KD2-H4K8ac_peak_24064 | 7.1181   | RARS_ENSG00000113643        |
| 5 | 167956035 | 1.68E+08 | KD2-H4K8ac_peak_24065 | 16.09057 | FBLL1_ENSG00000188573       |
| 5 | 167956823 | 1.68E+08 | KD2-H4K8ac_peak_24066 | 6.20982  | FBLL1_ENSG00000188573       |
| 5 | 168006068 | 1.68E+08 | KD2-H4K8ac_peak_24067 | 8.16906  | PANK3_ENSG00000120137       |
| 5 | 168080624 | 1.68E+08 | KD2-H4K8ac_peak_24068 | 10.0692  | CTC-558O2.2_ENSG00000254192 |
| 5 | 168084576 | 1.68E+08 | KD2-H4K8ac_peak_24069 | 4.211    |                             |
| 5 | 168182981 | 1.68E+08 | KD2-H4K8ac_peak_24070 | 12.74183 |                             |
| 5 | 168184084 | 1.68E+08 | KD2-H4K8ac_peak_24071 | 7.73418  |                             |
| 5 | 168185538 | 1.68E+08 | KD2-H4K8ac_peak_24072 | 4.86324  |                             |
| 5 | 168186395 | 1.68E+08 | KD2-H4K8ac_peak_24073 | 13.72842 |                             |
| 5 | 168189465 | 1.68E+08 | KD2-H4K8ac_peak_24074 | 6.99815  |                             |
| 5 | 168190620 | 1.68E+08 | KD2-H4K8ac_peak_24075 | 4.44923  |                             |
| 5 | 168193378 | 1.68E+08 | KD2-H4K8ac_peak_24076 | 12.36633 |                             |
| 5 | 168194251 | 1.68E+08 | KD2-H4K8ac_peak_24077 | 17.59645 | MIR218-2_ENSG00000207739    |
| 5 | 168198014 | 1.68E+08 | KD2-H4K8ac_peak_24078 | 10.43145 |                             |
| 5 | 168199928 | 1.68E+08 | KD2-H4K8ac_peak_24079 | 8.55271  |                             |
| 5 | 168200580 | 1.68E+08 | KD2-H4K8ac_peak_24080 | 7.56441  |                             |
| 5 | 168201873 | 1.68E+08 | KD2-H4K8ac_peak_24081 | 5.9696   |                             |
| 5 | 168206351 | 1.68E+08 | KD2-H4K8ac_peak_24082 | 4.211    |                             |
| 5 | 168224129 | 1.68E+08 | KD2-H4K8ac_peak_24083 | 8.30974  |                             |
| 5 | 168241012 | 1.68E+08 | KD2-H4K8ac_peak_24084 | 4.44527  |                             |
| 5 | 168271118 | 1.68E+08 | KD2-H4K8ac_peak_24085 | 21.36133 |                             |
| 5 | 168275229 | 1.68E+08 | KD2-H4K8ac_peak_24086 | 8.52559  |                             |
| 5 | 168278848 | 1.68E+08 | KD2-H4K8ac_peak_24087 | 5.88845  |                             |
| 5 | 168303099 | 1.68E+08 | KD2-H4K8ac_peak_24088 | 5.71749  |                             |
| 5 | 168307185 | 1.68E+08 | KD2-H4K8ac_peak_24089 | 6.25869  |                             |
| 5 | 168308832 | 1.68E+08 | KD2-H4K8ac_peak_24090 | 5.45396  |                             |
| 5 | 168309934 | 1.68E+08 | KD2-H4K8ac_peak_24091 | 11.09936 |                             |
| 5 | 168311870 | 1.68E+08 | KD2-H4K8ac_peak_24092 | 14.48084 |                             |
| 5 | 168312778 | 1.68E+08 | KD2-H4K8ac_peak_24093 | 7.96322  |                             |
| 5 | 168314027 | 1.68E+08 | KD2-H4K8ac_peak_24094 | 8.44476  |                             |
| 5 | 168314591 | 1.68E+08 | KD2-H4K8ac_peak_24095 | 5.88845  |                             |
| 5 | 168316860 | 1.68E+08 | KD2-H4K8ac_peak_24096 | 8.09472  |                             |
| 5 | 168322014 | 1.68E+08 | KD2-H4K8ac_peak_24097 | 8.30974  |                             |
| 5 | 168323771 | 1.68E+08 | KD2-H4K8ac_peak_24098 | 7.76329  |                             |
| 5 | 168324218 | 1.68E+08 | KD2-H4K8ac_peak_24099 | 7.42204  |                             |
| 5 | 168324733 | 1.68E+08 | KD2-H4K8ac_peak_24100 | 14.59844 |                             |
| 5 | 168326213 | 1.68E+08 | KD2-H4K8ac_peak_24101 | 8.55271  |                             |
| 5 | 168346042 | 1.68E+08 | KD2-H4K8ac_peak_24102 | 6.40683  |                             |



|   |           |          |                       |          |                                              |
|---|-----------|----------|-----------------------|----------|----------------------------------------------|
| 5 | 168363110 | 1.68E+08 | KD2-H4K8ac_peak_24103 | 8.28994  |                                              |
| 5 | 168369693 | 1.68E+08 | KD2-H4K8ac_peak_24104 | 6.1846   |                                              |
| 5 | 168371243 | 1.68E+08 | KD2-H4K8ac_peak_24105 | 5.71749  |                                              |
| 5 | 168372321 | 1.68E+08 | KD2-H4K8ac_peak_24106 | 11.00314 |                                              |
| 5 | 168374456 | 1.68E+08 | KD2-H4K8ac_peak_24107 | 12.06346 |                                              |
| 5 | 169010843 | 1.69E+08 | KD2-H4K8ac_peak_24108 | 11.89502 | SPDL1_ENSG00000040275                        |
| 5 | 169372989 | 1.69E+08 | KD2-H4K8ac_peak_24109 | 5.26591  |                                              |
| 5 | 169853625 | 1.7E+08  | KD2-H4K8ac_peak_24110 | 9.16531  |                                              |
| 5 | 170025199 | 1.7E+08  | KD2-H4K8ac_peak_24111 | 6.40683  |                                              |
| 5 | 170033739 | 1.7E+08  | KD2-H4K8ac_peak_24112 | 8.80225  |                                              |
| 5 | 170178964 | 1.7E+08  | KD2-H4K8ac_peak_24113 | 8.10216  |                                              |
| 5 | 170179602 | 1.7E+08  | KD2-H4K8ac_peak_24114 | 6.40297  |                                              |
| 5 | 170209600 | 1.7E+08  | KD2-H4K8ac_peak_24115 | 5.88845  |                                              |
| 5 | 170289074 | 1.7E+08  | KD2-H4K8ac_peak_24116 | 7.76329  | RANBP17_ENSG00000204764                      |
| 5 | 170702975 | 1.71E+08 | KD2-H4K8ac_peak_24117 | 5.25071  |                                              |
| 5 | 170735384 | 1.71E+08 | KD2-H4K8ac_peak_24118 | 7.76329  | TLX3_ENSG00000164438                         |
| 5 | 170762593 | 1.71E+08 | KD2-H4K8ac_peak_24119 | 5.13341  |                                              |
| 5 | 170813383 | 1.71E+08 | KD2-H4K8ac_peak_24120 | 9.63925  | MIR3912_ENSG00000264249;NPM1_ENSG00000181163 |
| 5 | 170814045 | 1.71E+08 | KD2-H4K8ac_peak_24121 | 9.242    | MIR3912_ENSG00000264249;NPM1_ENSG00000181163 |
| 5 | 170864445 | 1.71E+08 | KD2-H4K8ac_peak_24122 | 3.75035  |                                              |
| 5 | 171071473 | 1.71E+08 | KD2-H4K8ac_peak_24123 | 6.40683  |                                              |
| 5 | 171432877 | 1.71E+08 | KD2-H4K8ac_peak_24124 | 9.63487  | FBXW11_ENSG00000072803                       |
| 5 | 171434086 | 1.71E+08 | KD2-H4K8ac_peak_24125 | 9.20193  | FBXW11_ENSG00000072803                       |
| 5 | 171531001 | 1.72E+08 | KD2-H4K8ac_peak_24126 | 5.58333  |                                              |
| 5 | 171533450 | 1.72E+08 | KD2-H4K8ac_peak_24127 | 8.94415  |                                              |
| 5 | 171538333 | 1.72E+08 | KD2-H4K8ac_peak_24128 | 6.99815  |                                              |
| 5 | 171541951 | 1.72E+08 | KD2-H4K8ac_peak_24129 | 4.211    |                                              |
| 5 | 171571433 | 1.72E+08 | KD2-H4K8ac_peak_24130 | 4.86324  |                                              |
| 5 | 171614498 | 1.72E+08 | KD2-H4K8ac_peak_24131 | 8.59579  | STK10_ENSG00000072786                        |
| 5 | 171615449 | 1.72E+08 | KD2-H4K8ac_peak_24132 | 8.55271  | STK10_ENSG00000072786                        |
| 5 | 171672381 | 1.72E+08 | KD2-H4K8ac_peak_24133 | 9.15329  |                                              |
| 5 | 171710859 | 1.72E+08 | KD2-H4K8ac_peak_24134 | 14.06758 | UBTD2_ENSG00000168246                        |
| 5 | 171711335 | 1.72E+08 | KD2-H4K8ac_peak_24135 | 8.36432  | UBTD2_ENSG00000168246                        |
| 5 | 171880338 | 1.72E+08 | KD2-H4K8ac_peak_24136 | 7.76329  | SH3PXD2B_ENSG00000174705                     |
| 5 | 171881751 | 1.72E+08 | KD2-H4K8ac_peak_24137 | 10.01478 | SH3PXD2B_ENSG00000174705                     |
| 5 | 171977325 | 1.72E+08 | KD2-H4K8ac_peak_24138 | 7.70289  |                                              |
| 5 | 171978045 | 1.72E+08 | KD2-H4K8ac_peak_24139 | 6.99815  |                                              |
| 5 | 172067763 | 1.72E+08 | KD2-H4K8ac_peak_24140 | 8.10216  | NEURL1B_ENSG00000214357                      |
| 5 | 172068324 | 1.72E+08 | KD2-H4K8ac_peak_24141 | 7.38799  | NEURL1B_ENSG00000214357                      |
| 5 | 172086658 | 1.72E+08 | KD2-H4K8ac_peak_24142 | 12.88108 |                                              |
| 5 | 172092135 | 1.72E+08 | KD2-H4K8ac_peak_24143 | 11.00314 |                                              |
| 5 | 172133796 | 1.72E+08 | KD2-H4K8ac_peak_24144 | 6.16888  |                                              |
| 5 | 172134406 | 1.72E+08 | KD2-H4K8ac_peak_24145 | 12.06346 |                                              |
| 5 | 172192046 | 1.72E+08 | KD2-H4K8ac_peak_24146 | 10.0692  |                                              |
| 5 | 172197557 | 1.72E+08 | KD2-H4K8ac_peak_24147 | 10.30284 | DUSP1_ENSG00000120129                        |
| 5 | 172198513 | 1.72E+08 | KD2-H4K8ac_peak_24148 | 9.08816  | DUSP1_ENSG00000120129                        |

|   |           |          |                       |          |                                                      |
|---|-----------|----------|-----------------------|----------|------------------------------------------------------|
| 5 | 172199196 | 1.72E+08 | KD2-H4K8ac_peak_24149 | 18.31034 | DUSP1_ENSG00000120129                                |
| 5 | 172385594 | 1.72E+08 | KD2-H4K8ac_peak_24150 | 11.43353 | CTC-308K20.1_ENSG00000204758;RPL26L1_ENSG00000037241 |
| 5 | 172410264 | 1.72E+08 | KD2-H4K8ac_peak_24151 | 6.45083  | ATP6V0E1_ENSG00000113732                             |
| 5 | 172571272 | 1.73E+08 | KD2-H4K8ac_peak_24152 | 7.76329  | BNIP1_ENSG00000113734;CTC-209H22.3_ENSG00000253172   |
| 5 | 172710744 | 1.73E+08 | KD2-H4K8ac_peak_24153 | 5.54647  |                                                      |
| 5 | 172719060 | 1.73E+08 | KD2-H4K8ac_peak_24154 | 6.92624  | RNA5SP200_ENSG00000252169                            |
| 5 | 172750360 | 1.73E+08 | KD2-H4K8ac_peak_24155 | 7.67504  |                                                      |
| 5 | 172754228 | 1.73E+08 | KD2-H4K8ac_peak_24156 | 8.17557  |                                                      |
| 5 | 172755733 | 1.73E+08 | KD2-H4K8ac_peak_24157 | 4.04573  | STC2_ENSG00000113739                                 |
| 5 | 172756175 | 1.73E+08 | KD2-H4K8ac_peak_24158 | 13.09607 | STC2_ENSG00000113739                                 |
| 5 | 173043182 | 1.73E+08 | KD2-H4K8ac_peak_24159 | 16.8435  | BOD1_ENSG00000145919                                 |
| 5 | 173043900 | 1.73E+08 | KD2-H4K8ac_peak_24160 | 7.40633  | BOD1_ENSG00000145919                                 |
| 5 | 173060845 | 1.73E+08 | KD2-H4K8ac_peak_24161 | 3.80759  |                                                      |
| 5 | 173071135 | 1.73E+08 | KD2-H4K8ac_peak_24162 | 11.05407 |                                                      |
| 5 | 173124218 | 1.73E+08 | KD2-H4K8ac_peak_24163 | 5.40356  |                                                      |
| 5 | 173125423 | 1.73E+08 | KD2-H4K8ac_peak_24164 | 5.08628  |                                                      |
| 5 | 173126018 | 1.73E+08 | KD2-H4K8ac_peak_24165 | 7.96322  |                                                      |
| 5 | 173127331 | 1.73E+08 | KD2-H4K8ac_peak_24166 | 8.59579  |                                                      |
| 5 | 173146639 | 1.73E+08 | KD2-H4K8ac_peak_24167 | 14.66631 |                                                      |
| 5 | 173147353 | 1.73E+08 | KD2-H4K8ac_peak_24168 | 8.30974  |                                                      |
| 5 | 173148579 | 1.73E+08 | KD2-H4K8ac_peak_24169 | 9.08816  |                                                      |
| 5 | 173149942 | 1.73E+08 | KD2-H4K8ac_peak_24170 | 4.211    |                                                      |
| 5 | 173180202 | 1.73E+08 | KD2-H4K8ac_peak_24171 | 6.13909  |                                                      |
| 5 | 173184716 | 1.73E+08 | KD2-H4K8ac_peak_24172 | 11.94983 |                                                      |
| 5 | 173209237 | 1.73E+08 | KD2-H4K8ac_peak_24173 | 8.1233   |                                                      |
| 5 | 173314569 | 1.73E+08 | KD2-H4K8ac_peak_24174 | 11.3394  | CPEB4_ENSG00000113742                                |
| 5 | 173400435 | 1.73E+08 | KD2-H4K8ac_peak_24175 | 8.55271  | C5orf47_ENSG00000185056                              |
| 5 | 173510023 | 1.74E+08 | KD2-H4K8ac_peak_24176 | 8.37231  |                                                      |
| 5 | 173510583 | 1.74E+08 | KD2-H4K8ac_peak_24177 | 6.25869  |                                                      |
| 5 | 173511045 | 1.74E+08 | KD2-H4K8ac_peak_24178 | 12.80176 |                                                      |
| 5 | 173547366 | 1.74E+08 | KD2-H4K8ac_peak_24179 | 4.67342  |                                                      |
| 5 | 173594638 | 1.74E+08 | KD2-H4K8ac_peak_24180 | 5.25071  |                                                      |
| 5 | 173618148 | 1.74E+08 | KD2-H4K8ac_peak_24181 | 7.1181   |                                                      |
| 5 | 173622154 | 1.74E+08 | KD2-H4K8ac_peak_24182 | 6.66692  |                                                      |
| 5 | 173648783 | 1.74E+08 | KD2-H4K8ac_peak_24183 | 8.17902  |                                                      |
| 5 | 173659460 | 1.74E+08 | KD2-H4K8ac_peak_24184 | 6.0073   |                                                      |
| 5 | 173661574 | 1.74E+08 | KD2-H4K8ac_peak_24185 | 5.14125  |                                                      |
| 5 | 173663832 | 1.74E+08 | KD2-H4K8ac_peak_24186 | 6.56211  |                                                      |
| 5 | 173738477 | 1.74E+08 | KD2-H4K8ac_peak_24187 | 7.74292  |                                                      |
| 5 | 173738904 | 1.74E+08 | KD2-H4K8ac_peak_24188 | 15.40367 |                                                      |
| 5 | 173750898 | 1.74E+08 | KD2-H4K8ac_peak_24189 | 6.40683  |                                                      |
| 5 | 173756102 | 1.74E+08 | KD2-H4K8ac_peak_24190 | 3.83717  | CTC-430J12.2_ENSG00000249722                         |
| 5 | 173763966 | 1.74E+08 | KD2-H4K8ac_peak_24191 | 6.85193  | RP11-267A15.1_ENSG00000249306                        |
| 5 | 173811515 | 1.74E+08 | KD2-H4K8ac_peak_24192 | 5.88845  |                                                      |
| 5 | 173991518 | 1.74E+08 | KD2-H4K8ac_peak_24193 | 4.42765  |                                                      |
| 5 | 174035718 | 1.74E+08 | KD2-H4K8ac_peak_24194 | 7.13615  |                                                      |

|   |           |          |                       |          |                                                       |
|---|-----------|----------|-----------------------|----------|-------------------------------------------------------|
| 5 | 174150862 | 1.74E+08 | KD2-H4K8ac_peak_24195 | 6.14257  | MSX2_ENSG00000120149                                  |
| 5 | 174178028 | 1.74E+08 | KD2-H4K8ac_peak_24196 | 10.7186  | CTD-2532K18.1_ENSG00000251670;MIR4634_ENSG00000266890 |
| 5 | 174905597 | 1.75E+08 | KD2-H4K8ac_peak_24197 | 12.57143 |                                                       |
| 5 | 175223649 | 1.75E+08 | KD2-H4K8ac_peak_24198 | 10.73134 | CPLX2_ENSG00000145920                                 |
| 5 | 175288433 | 1.75E+08 | KD2-H4K8ac_peak_24199 | 4.54006  |                                                       |
| 5 | 175335613 | 1.75E+08 | KD2-H4K8ac_peak_24200 | 3.75035  |                                                       |
| 5 | 175336082 | 1.75E+08 | KD2-H4K8ac_peak_24201 | 9.15329  |                                                       |
| 5 | 175395018 | 1.75E+08 | KD2-H4K8ac_peak_24202 | 11.7608  |                                                       |
| 5 | 175561429 | 1.76E+08 | KD2-H4K8ac_peak_24203 | 11.05467 |                                                       |
| 5 | 175662424 | 1.76E+08 | KD2-H4K8ac_peak_24204 | 6.40683  |                                                       |
| 5 | 175788311 | 1.76E+08 | KD2-H4K8ac_peak_24205 | 8.10216  | KIAA1191_ENSG00000122203                              |
| 5 | 175792120 | 1.76E+08 | KD2-H4K8ac_peak_24206 | 4.86324  | ARL10_ENSG00000175414                                 |
| 5 | 175792531 | 1.76E+08 | KD2-H4K8ac_peak_24207 | 14.98671 | ARL10_ENSG00000175414                                 |
| 5 | 175815207 | 1.76E+08 | KD2-H4K8ac_peak_24208 | 10.95625 | NOP16_ENSG00000048162;HIGD2A_ENSG00000146066          |
| 5 | 175843733 | 1.76E+08 | KD2-H4K8ac_peak_24209 | 6.05809  | CLTB_ENSG00000175416                                  |
| 5 | 175874296 | 1.76E+08 | KD2-H4K8ac_peak_24210 | 6.65673  | FAF2_ENSG00000113194                                  |
| 5 | 175875430 | 1.76E+08 | KD2-H4K8ac_peak_24211 | 7.76329  | FAF2_ENSG00000113194                                  |
| 5 | 175962642 | 1.76E+08 | KD2-H4K8ac_peak_24212 | 20.02161 | RNF44_ENSG00000146083                                 |
| 5 | 175969741 | 1.76E+08 | KD2-H4K8ac_peak_24213 | 10.37746 | CDHR2_ENSG00000074276                                 |
| 5 | 175970890 | 1.76E+08 | KD2-H4K8ac_peak_24214 | 7.45501  |                                                       |
| 5 | 176037314 | 1.76E+08 | KD2-H4K8ac_peak_24215 | 24.02151 | GPRIN1_ENSG00000169258                                |
| 5 | 176037835 | 1.76E+08 | KD2-H4K8ac_peak_24216 | 7.86151  | GPRIN1_ENSG00000169258                                |
| 5 | 176073809 | 1.76E+08 | KD2-H4K8ac_peak_24217 | 14.66631 | TSPAN17_ENSG00000048140                               |
| 5 | 176074498 | 1.76E+08 | KD2-H4K8ac_peak_24218 | 9.77606  | TSPAN17_ENSG00000048140                               |
| 5 | 176165939 | 1.76E+08 | KD2-H4K8ac_peak_24219 | 6.14031  | RP11-375B1.2_ENSG00000251446                          |
| 5 | 176166443 | 1.76E+08 | KD2-H4K8ac_peak_24220 | 16.40085 | RP11-375B1.2_ENSG00000251446                          |
| 5 | 176220229 | 1.76E+08 | KD2-H4K8ac_peak_24221 | 6.55628  |                                                       |
| 5 | 176244335 | 1.76E+08 | KD2-H4K8ac_peak_24222 | 13.13969 |                                                       |
| 5 | 176262168 | 1.76E+08 | KD2-H4K8ac_peak_24223 | 3.75035  |                                                       |
| 5 | 176264300 | 1.76E+08 | KD2-H4K8ac_peak_24224 | 4.211    |                                                       |
| 5 | 176267578 | 1.76E+08 | KD2-H4K8ac_peak_24225 | 8.42997  |                                                       |
| 5 | 176271221 | 1.76E+08 | KD2-H4K8ac_peak_24226 | 5.54647  |                                                       |
| 5 | 176271904 | 1.76E+08 | KD2-H4K8ac_peak_24227 | 9.36516  |                                                       |
| 5 | 176289912 | 1.76E+08 | KD2-H4K8ac_peak_24228 | 5.51783  |                                                       |
| 5 | 176293099 | 1.76E+08 | KD2-H4K8ac_peak_24229 | 4.62548  |                                                       |
| 5 | 176310859 | 1.76E+08 | KD2-H4K8ac_peak_24230 | 8.2413   |                                                       |
| 5 | 176433348 | 1.76E+08 | KD2-H4K8ac_peak_24231 | 8.16906  |                                                       |
| 5 | 176433992 | 1.76E+08 | KD2-H4K8ac_peak_24232 | 4.44748  |                                                       |
| 5 | 176449790 | 1.76E+08 | KD2-H4K8ac_peak_24233 | 7.49599  | UIMC1_ENSG00000087206;ZNF346_ENSG00000113761          |
| 5 | 176514174 | 1.77E+08 | KD2-H4K8ac_peak_24234 | 3.75035  | FGFR4_ENSG00000160867                                 |
| 5 | 176541196 | 1.77E+08 | KD2-H4K8ac_peak_24235 | 10.2048  |                                                       |
| 5 | 176560124 | 1.77E+08 | KD2-H4K8ac_peak_24236 | 25.36636 | NSD1_ENSG00000165671                                  |
| 5 | 176730234 | 1.77E+08 | KD2-H4K8ac_peak_24237 | 11.3394  | RAB24_ENSG00000169228;PRELID1_ENSG00000169230         |
| 5 | 176778286 | 1.77E+08 | KD2-H4K8ac_peak_24238 | 15.58442 | LMAN2_ENSG00000169223                                 |
| 5 | 176779104 | 1.77E+08 | KD2-H4K8ac_peak_24239 | 9.20193  | LMAN2_ENSG00000169223                                 |
| 5 | 176789901 | 1.77E+08 | KD2-H4K8ac_peak_24240 | 9.1707   |                                                       |

|   |           |          |                       |          |                                                       |
|---|-----------|----------|-----------------------|----------|-------------------------------------------------------|
| 5 | 176793051 | 1.77E+08 | KD2-H4K8ac_peak_24241 | 18.25771 |                                                       |
| 5 | 176794371 | 1.77E+08 | KD2-H4K8ac_peak_24242 | 5.59859  |                                                       |
| 5 | 176797822 | 1.77E+08 | KD2-H4K8ac_peak_24243 | 6.22239  |                                                       |
| 5 | 176817857 | 1.77E+08 | KD2-H4K8ac_peak_24244 | 12.82393 |                                                       |
| 5 | 176829245 | 1.77E+08 | KD2-H4K8ac_peak_24245 | 13.50024 | GRK6_ENSG00000198055                                  |
| 5 | 176830142 | 1.77E+08 | KD2-H4K8ac_peak_24246 | 5.38581  | GRK6_ENSG00000198055                                  |
| 5 | 176831647 | 1.77E+08 | KD2-H4K8ac_peak_24247 | 8.5251   |                                                       |
| 5 | 176852613 | 1.77E+08 | KD2-H4K8ac_peak_24248 | 8.55271  |                                                       |
| 5 | 176853876 | 1.77E+08 | KD2-H4K8ac_peak_24249 | 7.70289  |                                                       |
| 5 | 176873180 | 1.77E+08 | KD2-H4K8ac_peak_24250 | 11.05467 | PRR7-AS1_ENSG00000246334;PRR7_ENSG00000131188         |
| 5 | 176880963 | 1.77E+08 | KD2-H4K8ac_peak_24251 | 8.58725  |                                                       |
| 5 | 176881956 | 1.77E+08 | KD2-H4K8ac_peak_24252 | 8.23274  |                                                       |
| 5 | 176882443 | 1.77E+08 | KD2-H4K8ac_peak_24253 | 4.79789  |                                                       |
| 5 | 176899777 | 1.77E+08 | KD2-H4K8ac_peak_24254 | 17.83665 | DBN1_ENSG00000113758                                  |
| 5 | 176901070 | 1.77E+08 | KD2-H4K8ac_peak_24255 | 6.41015  | DBN1_ENSG00000113758                                  |
| 5 | 176906918 | 1.77E+08 | KD2-H4K8ac_peak_24256 | 11.89502 |                                                       |
| 5 | 176924132 | 1.77E+08 | KD2-H4K8ac_peak_24257 | 7.07117  | PDLIM7_ENSG00000196923                                |
| 5 | 176927602 | 1.77E+08 | KD2-H4K8ac_peak_24258 | 5.51783  |                                                       |
| 5 | 176928293 | 1.77E+08 | KD2-H4K8ac_peak_24259 | 7.13615  |                                                       |
| 5 | 176943639 | 1.77E+08 | KD2-H4K8ac_peak_24260 | 11.05467 | DDX41_ENSG00000183258                                 |
| 5 | 176944257 | 1.77E+08 | KD2-H4K8ac_peak_24261 | 5.9696   | DDX41_ENSG00000183258                                 |
| 5 | 176981204 | 1.77E+08 | KD2-H4K8ac_peak_24262 | 7.98621  | FAM193B_ENSG00000146067;RP11-1277A3.3_ENSG00000272459 |
| 5 | 176981755 | 1.77E+08 | KD2-H4K8ac_peak_24263 | 6.40683  | FAM193B_ENSG00000146067;RP11-1277A3.3_ENSG00000272459 |
| 5 | 177019272 | 1.77E+08 | KD2-H4K8ac_peak_24264 | 12.17278 | TMED9_ENSG00000184840                                 |
| 5 | 177026425 | 1.77E+08 | KD2-H4K8ac_peak_24265 | 16.14659 | B4GALT7_ENSG00000027847                               |
| 5 | 177540308 | 1.78E+08 | KD2-H4K8ac_peak_24266 | 9.16531  | N4BP3_ENSG00000145911                                 |
| 5 | 177548324 | 1.78E+08 | KD2-H4K8ac_peak_24267 | 5.51783  |                                                       |
| 5 | 177556749 | 1.78E+08 | KD2-H4K8ac_peak_24268 | 4.66652  | RMND5B_ENSG00000145916                                |
| 5 | 177557244 | 1.78E+08 | KD2-H4K8ac_peak_24269 | 8.16906  | RMND5B_ENSG00000145916                                |
| 5 | 177591055 | 1.78E+08 | KD2-H4K8ac_peak_24270 | 14.48084 |                                                       |
| 5 | 177614035 | 1.78E+08 | KD2-H4K8ac_peak_24271 | 8.30974  | GMCL1P1_ENSG00000244234                               |
| 5 | 177630925 | 1.78E+08 | KD2-H4K8ac_peak_24272 | 5.30799  | HNRNPAB_ENSG00000197451                               |
| 5 | 177631596 | 1.78E+08 | KD2-H4K8ac_peak_24273 | 9.61895  | HNRNPAB_ENSG00000197451                               |
| 5 | 177658899 | 1.78E+08 | KD2-H4K8ac_peak_24274 | 25.71759 | PHYKPL_ENSG00000175309                                |
| 5 | 177758437 | 1.78E+08 | KD2-H4K8ac_peak_24275 | 6.30229  |                                                       |
| 5 | 177763978 | 1.78E+08 | KD2-H4K8ac_peak_24276 | 9.20193  |                                                       |
| 5 | 177767512 | 1.78E+08 | KD2-H4K8ac_peak_24277 | 4.77079  |                                                       |
| 5 | 177775404 | 1.78E+08 | KD2-H4K8ac_peak_24278 | 6.65673  |                                                       |
| 5 | 177783645 | 1.78E+08 | KD2-H4K8ac_peak_24279 | 9.59147  |                                                       |
| 5 | 177799037 | 1.78E+08 | KD2-H4K8ac_peak_24280 | 5.40356  |                                                       |
| 5 | 177809244 | 1.78E+08 | KD2-H4K8ac_peak_24281 | 11.07495 |                                                       |
| 5 | 177824071 | 1.78E+08 | KD2-H4K8ac_peak_24282 | 5.14125  |                                                       |
| 5 | 177825878 | 1.78E+08 | KD2-H4K8ac_peak_24283 | 11.05407 |                                                       |
| 5 | 177841161 | 1.78E+08 | KD2-H4K8ac_peak_24284 | 5.49367  |                                                       |
| 5 | 177855858 | 1.78E+08 | KD2-H4K8ac_peak_24285 | 9.89383  |                                                       |
| 5 | 177861013 | 1.78E+08 | KD2-H4K8ac_peak_24286 | 9.95119  |                                                       |

|   |           |          |                       |          |                                               |
|---|-----------|----------|-----------------------|----------|-----------------------------------------------|
| 5 | 177862273 | 1.78E+08 | KD2-H4K8ac_peak_24287 | 12.52363 |                                               |
| 5 | 177877133 | 1.78E+08 | KD2-H4K8ac_peak_24288 | 9.73431  |                                               |
| 5 | 177896524 | 1.78E+08 | KD2-H4K8ac_peak_24289 | 6.40683  |                                               |
| 5 | 178016638 | 1.78E+08 | KD2-H4K8ac_peak_24290 | 7.45501  | COL23A1_ENSG00000050767                       |
| 5 | 178053722 | 1.78E+08 | KD2-H4K8ac_peak_24291 | 11.00004 |                                               |
| 5 | 178054294 | 1.78E+08 | KD2-H4K8ac_peak_24292 | 15.82362 |                                               |
| 5 | 178157884 | 1.78E+08 | KD2-H4K8ac_peak_24293 | 6.57893  | ZNF354A_ENSG00000169131                       |
| 5 | 178287043 | 1.78E+08 | KD2-H4K8ac_peak_24294 | 7.95563  | ZNF354B_ENSG00000178338                       |
| 5 | 178322314 | 1.78E+08 | KD2-H4K8ac_peak_24295 | 17.42905 | ZFP2_ENSG00000198939                          |
| 5 | 178367498 | 1.78E+08 | KD2-H4K8ac_peak_24296 | 10.94087 | ZNF454_ENSG00000178187                        |
| 5 | 178450227 | 1.78E+08 | KD2-H4K8ac_peak_24297 | 19.33282 | ZNF879_ENSG00000234284                        |
| 5 | 178487419 | 1.78E+08 | KD2-H4K8ac_peak_24298 | 10.96455 | ZNF354C_ENSG00000177932                       |
| 5 | 178593889 | 1.79E+08 | KD2-H4K8ac_peak_24299 | 6.65673  |                                               |
| 5 | 178688675 | 1.79E+08 | KD2-H4K8ac_peak_24300 | 4.67342  |                                               |
| 5 | 178694308 | 1.79E+08 | KD2-H4K8ac_peak_24301 | 6.18308  |                                               |
| 5 | 178696772 | 1.79E+08 | KD2-H4K8ac_peak_24302 | 6.90231  |                                               |
| 5 | 178697216 | 1.79E+08 | KD2-H4K8ac_peak_24303 | 8.55271  |                                               |
| 5 | 178712431 | 1.79E+08 | KD2-H4K8ac_peak_24304 | 9.96798  |                                               |
| 5 | 178712911 | 1.79E+08 | KD2-H4K8ac_peak_24305 | 7.70289  |                                               |
| 5 | 178713334 | 1.79E+08 | KD2-H4K8ac_peak_24306 | 5.40356  |                                               |
| 5 | 178714080 | 1.79E+08 | KD2-H4K8ac_peak_24307 | 9.70057  |                                               |
| 5 | 178714817 | 1.79E+08 | KD2-H4K8ac_peak_24308 | 9.36516  |                                               |
| 5 | 178721405 | 1.79E+08 | KD2-H4K8ac_peak_24309 | 5.88845  |                                               |
| 5 | 178728841 | 1.79E+08 | KD2-H4K8ac_peak_24310 | 6.40683  |                                               |
| 5 | 178735765 | 1.79E+08 | KD2-H4K8ac_peak_24311 | 6.25869  |                                               |
| 5 | 178736879 | 1.79E+08 | KD2-H4K8ac_peak_24312 | 8.85813  |                                               |
| 5 | 178740891 | 1.79E+08 | KD2-H4K8ac_peak_24313 | 29.10149 |                                               |
| 5 | 178742171 | 1.79E+08 | KD2-H4K8ac_peak_24314 | 8.16133  |                                               |
| 5 | 178748339 | 1.79E+08 | KD2-H4K8ac_peak_24315 | 5.88845  |                                               |
| 5 | 178749660 | 1.79E+08 | KD2-H4K8ac_peak_24316 | 10.19949 |                                               |
| 5 | 178750317 | 1.79E+08 | KD2-H4K8ac_peak_24317 | 6.99815  |                                               |
| 5 | 178757598 | 1.79E+08 | KD2-H4K8ac_peak_24318 | 7.59643  |                                               |
| 5 | 178772622 | 1.79E+08 | KD2-H4K8ac_peak_24319 | 6.98302  | ADAMTS2_ENSG00000087116                       |
| 5 | 178862829 | 1.79E+08 | KD2-H4K8ac_peak_24320 | 5.88845  |                                               |
| 5 | 178864553 | 1.79E+08 | KD2-H4K8ac_peak_24321 | 7.62396  |                                               |
| 5 | 178865397 | 1.79E+08 | KD2-H4K8ac_peak_24322 | 14.27217 |                                               |
| 5 | 178977215 | 1.79E+08 | KD2-H4K8ac_peak_24323 | 18.54875 | RUFY1_ENSG00000176783                         |
| 5 | 178986230 | 1.79E+08 | KD2-H4K8ac_peak_24324 | 11.03331 |                                               |
| 5 | 179051041 | 1.79E+08 | KD2-H4K8ac_peak_24325 | 12.14909 |                                               |
| 5 | 179105103 | 1.79E+08 | KD2-H4K8ac_peak_24326 | 8.53092  | CANX_ENSG00000127022;HMGB3P22_ENSG00000225051 |
| 5 | 179105806 | 1.79E+08 | KD2-H4K8ac_peak_24327 | 12.74171 | CANX_ENSG00000127022;HMGB3P22_ENSG00000225051 |
| 5 | 179126051 | 1.79E+08 | KD2-H4K8ac_peak_24328 | 5.13615  |                                               |
| 5 | 179159896 | 1.79E+08 | KD2-H4K8ac_peak_24329 | 8.58069  | MAML1_ENSG00000161021                         |
| 5 | 179222162 | 1.79E+08 | KD2-H4K8ac_peak_24330 | 6.99815  |                                               |
| 5 | 179223434 | 1.79E+08 | KD2-H4K8ac_peak_24331 | 8.30974  |                                               |
| 5 | 179234075 | 1.79E+08 | KD2-H4K8ac_peak_24332 | 16.15695 | MGAT4B_ENSG00000161013;SQSTM1_ENSG00000161011 |

|   |           |          |                       |          |                                                           |
|---|-----------|----------|-----------------------|----------|-----------------------------------------------------------|
| 5 | 179245714 | 1.79E+08 | KD2-H4K8ac_peak_24333 | 9.20193  |                                                           |
| 5 | 179246474 | 1.79E+08 | KD2-H4K8ac_peak_24334 | 11.80283 |                                                           |
| 5 | 179247403 | 1.79E+08 | KD2-H4K8ac_peak_24335 | 14.63726 |                                                           |
| 5 | 179247995 | 1.79E+08 | KD2-H4K8ac_peak_24336 | 4.19765  |                                                           |
| 5 | 179286057 | 1.79E+08 | KD2-H4K8ac_peak_24337 | 13.81781 | CTC-241N9.1_ENSG00000245317                               |
| 5 | 179334217 | 1.79E+08 | KD2-H4K8ac_peak_24338 | 6.65673  | TBC1D9B_ENSG00000197226                                   |
| 5 | 179335456 | 1.79E+08 | KD2-H4K8ac_peak_24339 | 6.85193  | TBC1D9B_ENSG00000197226                                   |
| 5 | 179498157 | 1.79E+08 | KD2-H4K8ac_peak_24340 | 7.47462  | RNF130_ENSG00000113269                                    |
| 5 | 179498865 | 1.79E+08 | KD2-H4K8ac_peak_24341 | 16.71655 | RNF130_ENSG00000113269                                    |
| 5 | 179517121 | 1.8E+08  | KD2-H4K8ac_peak_24342 | 13.36684 |                                                           |
| 5 | 179518056 | 1.8E+08  | KD2-H4K8ac_peak_24343 | 7.22457  |                                                           |
| 5 | 179604281 | 1.8E+08  | KD2-H4K8ac_peak_24344 | 10.77651 |                                                           |
| 5 | 179635592 | 1.8E+08  | KD2-H4K8ac_peak_24345 | 7.63551  | RASGEF1C_ENSG00000146090                                  |
| 5 | 179636404 | 1.8E+08  | KD2-H4K8ac_peak_24346 | 10.17698 | RASGEF1C_ENSG00000146090                                  |
| 5 | 179716958 | 1.8E+08  | KD2-H4K8ac_peak_24347 | 10.17698 |                                                           |
| 5 | 179718374 | 1.8E+08  | KD2-H4K8ac_peak_24348 | 11.81257 | MAPK9_ENSG00000050748                                     |
| 5 | 179719225 | 1.8E+08  | KD2-H4K8ac_peak_24349 | 7.47462  | MAPK9_ENSG00000050748;CTB-129O4.1_ENSG00000248367         |
| 5 | 179741003 | 1.8E+08  | KD2-H4K8ac_peak_24350 | 6.47635  |                                                           |
| 5 | 179808082 | 1.8E+08  | KD2-H4K8ac_peak_24351 | 6.55628  |                                                           |
| 5 | 179808915 | 1.8E+08  | KD2-H4K8ac_peak_24352 | 6.40297  |                                                           |
| 5 | 179921484 | 1.8E+08  | KD2-H4K8ac_peak_24353 | 8.1235   | CNOT6_ENSG00000113300                                     |
| 5 | 180229997 | 1.8E+08  | KD2-H4K8ac_peak_24354 | 14.43704 |                                                           |
| 5 | 180236910 | 1.8E+08  | KD2-H4K8ac_peak_24355 | 16.8435  |                                                           |
| 5 | 180258018 | 1.8E+08  | KD2-H4K8ac_peak_24356 | 11.80283 | LINC00847_ENSG00000245060                                 |
| 5 | 180287461 | 1.8E+08  | KD2-H4K8ac_peak_24357 | 15.81711 | ZFP62_ENSG00000196670                                     |
| 5 | 180586864 | 1.81E+08 | KD2-H4K8ac_peak_24358 | 9.26408  |                                                           |
| 5 | 180588277 | 1.81E+08 | KD2-H4K8ac_peak_24359 | 5.13615  |                                                           |
| 5 | 180611368 | 1.81E+08 | KD2-H4K8ac_peak_24360 | 4.8888   |                                                           |
| 5 | 180617853 | 1.81E+08 | KD2-H4K8ac_peak_24361 | 6.17833  | CTC-338M12.2_ENSG00000248473;CTC-338M12.5_ENSG00000250222 |
| 5 | 180618910 | 1.81E+08 | KD2-H4K8ac_peak_24362 | 11.79585 | CTC-338M12.2_ENSG00000248473;CTC-338M12.5_ENSG00000250222 |
| 5 | 180634064 | 1.81E+08 | KD2-H4K8ac_peak_24363 | 5.43522  | CTC-338M12.1_ENSG00000248514                              |
| 5 | 180649055 | 1.81E+08 | KD2-H4K8ac_peak_24364 | 8.17557  | TRIM41_ENSG00000146063;MIR4638_ENSG00000264732            |
| 5 | 180650701 | 1.81E+08 | KD2-H4K8ac_peak_24365 | 11.03331 |                                                           |
| 5 | 180670638 | 1.81E+08 | KD2-H4K8ac_peak_24366 | 11.58876 | SNORD95_ENSG00000264549                                   |
| 5 | 180672655 | 1.81E+08 | KD2-H4K8ac_peak_24367 | 9.63487  | CTC-338M12.4_ENSG00000233937                              |
| 5 | 180673548 | 1.81E+08 | KD2-H4K8ac_peak_24368 | 11.24702 | CTC-338M12.4_ENSG00000233937                              |
| 5 | 180688258 | 1.81E+08 | KD2-H4K8ac_peak_24369 | 11.16154 | TRIM52_ENSG00000183718;TRIM52-AS1_ENSG00000248275         |
| 5 | 180689348 | 1.81E+08 | KD2-H4K8ac_peak_24370 | 5.14125  |                                                           |
| 6 | 291603    | 292338   | KD2-H4K8ac_peak_24371 | 23.13674 | DUSP22_ENSG00000112679                                    |
| 6 | 692885    | 693671   | KD2-H4K8ac_peak_24372 | 14.12659 | EXOC2_ENSG00000112685                                     |
| 6 | 1604439   | 1604631  | KD2-H4K8ac_peak_24373 | 5.75452  |                                                           |
| 6 | 1609269   | 1609955  | KD2-H4K8ac_peak_24374 | 13.49029 | FOXC1_ENSG00000054598                                     |
| 6 | 1611560   | 1612132  | KD2-H4K8ac_peak_24375 | 4.86324  | FOXC1_ENSG00000054598                                     |
| 6 | 1766841   | 1767237  | KD2-H4K8ac_peak_24376 | 6.16888  |                                                           |
| 6 | 1801602   | 1801879  | KD2-H4K8ac_peak_24377 | 4.42765  |                                                           |
| 6 | 1802201   | 1802399  | KD2-H4K8ac_peak_24378 | 6.8836   |                                                           |

|   |         |         |                       |          |                                                                                |
|---|---------|---------|-----------------------|----------|--------------------------------------------------------------------------------|
| 6 | 1804471 | 1804782 | KD2-H4K8ac_peak_24379 | 10.21502 |                                                                                |
| 6 | 1821408 | 1821600 | KD2-H4K8ac_peak_24380 | 5.57044  |                                                                                |
| 6 | 1855484 | 1855816 | KD2-H4K8ac_peak_24381 | 4.59928  |                                                                                |
| 6 | 1903730 | 1904091 | KD2-H4K8ac_peak_24382 | 6.83936  |                                                                                |
| 6 | 1904747 | 1904969 | KD2-H4K8ac_peak_24383 | 9.08816  |                                                                                |
| 6 | 2634380 | 2634789 | KD2-H4K8ac_peak_24384 | 10.19949 | C6orf195_ENSG00000164385                                                       |
| 6 | 2764988 | 2765252 | KD2-H4K8ac_peak_24385 | 11.86082 | WRNIP1_ENSG00000124535                                                         |
| 6 | 2765877 | 2766126 | KD2-H4K8ac_peak_24386 | 7.90806  | WRNIP1_ENSG00000124535                                                         |
| 6 | 2766333 | 2766699 | KD2-H4K8ac_peak_24387 | 6.65673  | WRNIP1_ENSG00000124535                                                         |
| 6 | 2841987 | 2842224 | KD2-H4K8ac_peak_24388 | 9.10868  | SERPINB1_ENSG00000021355                                                       |
| 6 | 2875600 | 2876368 | KD2-H4K8ac_peak_24389 | 13.57066 |                                                                                |
| 6 | 2876571 | 2876906 | KD2-H4K8ac_peak_24390 | 6.16888  |                                                                                |
| 6 | 2971149 | 2971594 | KD2-H4K8ac_peak_24391 | 16.71655 | SERPINB6_ENSG00000124570                                                       |
| 6 | 2971818 | 2972329 | KD2-H4K8ac_peak_24392 | 8.10216  | SERPINB6_ENSG00000124570                                                       |
| 6 | 2988412 | 2988669 | KD2-H4K8ac_peak_24393 | 12.42761 | LINC01011_ENSG00000244041;NQO2_ENSG00000124588                                 |
| 6 | 2989000 | 2989647 | KD2-H4K8ac_peak_24394 | 12.79505 | LINC01011_ENSG00000244041;NQO2_ENSG00000124588                                 |
| 6 | 2991245 | 2991451 | KD2-H4K8ac_peak_24395 | 3.75035  |                                                                                |
| 6 | 3000149 | 3000694 | KD2-H4K8ac_peak_24396 | 11.05407 | RP1-90J20.8_ENSG00000224846                                                    |
| 6 | 3053762 | 3054389 | KD2-H4K8ac_peak_24397 | 9.1707   |                                                                                |
| 6 | 3064162 | 3064888 | KD2-H4K8ac_peak_24398 | 6.72334  | RIPK1_ENSG00000137275                                                          |
| 6 | 3068772 | 3069529 | KD2-H4K8ac_peak_24399 | 10.76532 | RP1-40E16.12_ENSG00000272277                                                   |
| 6 | 3157545 | 3158279 | KD2-H4K8ac_peak_24400 | 19.47291 | TUBB2A_ENSG00000137267                                                         |
| 6 | 3162884 | 3163330 | KD2-H4K8ac_peak_24401 | 18.37277 |                                                                                |
| 6 | 3195193 | 3195700 | KD2-H4K8ac_peak_24402 | 7.76329  | RP1-40E16.9_ENSG00000230269                                                    |
| 6 | 3209530 | 3209973 | KD2-H4K8ac_peak_24403 | 10.0089  |                                                                                |
| 6 | 3228139 | 3228746 | KD2-H4K8ac_peak_24404 | 20.64015 |                                                                                |
| 6 | 3229108 | 3230086 | KD2-H4K8ac_peak_24405 | 6.67092  |                                                                                |
| 6 | 3231388 | 3232265 | KD2-H4K8ac_peak_24406 | 14.8083  | TUBB2B_ENSG00000137285;PSMG4_ENSG00000180822                                   |
| 6 | 3259267 | 3259675 | KD2-H4K8ac_peak_24407 | 7.76329  |                                                                                |
| 6 | 4018438 | 4018738 | KD2-H4K8ac_peak_24408 | 4.91674  | RP3-406P24.4_ENSG00000272248                                                   |
| 6 | 4021607 | 4021968 | KD2-H4K8ac_peak_24409 | 10.21366 | RP3-406P24.3_ENSG00000230648;PRPF4B_ENSG00000112739                            |
| 6 | 4135380 | 4135635 | KD2-H4K8ac_peak_24410 | 6.66692  | ECI2_ENSG00000198721;RP3-400B16.4_ENSG00000254821;RP3-400B16.1_ENSG00000234817 |
| 6 | 4136229 | 4136580 | KD2-H4K8ac_peak_24411 | 6.25869  | ECI2_ENSG00000198721;RP3-400B16.4_ENSG00000254821;RP3-400B16.1_ENSG00000234817 |
| 6 | 4775370 | 4775564 | KD2-H4K8ac_peak_24412 | 5.30799  | RP3-430A16.1_ENSG00000236336                                                   |
| 6 | 4974315 | 4974567 | KD2-H4K8ac_peak_24413 | 5.82799  |                                                                                |
| 6 | 5004441 | 5004789 | KD2-H4K8ac_peak_24414 | 8.1233   | RPP40_ENSG00000124787                                                          |
| 6 | 5026486 | 5027053 | KD2-H4K8ac_peak_24415 | 4.211    |                                                                                |
| 6 | 5261526 | 5262165 | KD2-H4K8ac_peak_24416 | 9.65086  | LYRM4_ENSG00000214113;FARS2_ENSG00000145982                                    |
| 6 | 5604212 | 5604423 | KD2-H4K8ac_peak_24417 | 9.15329  |                                                                                |
| 6 | 5663964 | 5664388 | KD2-H4K8ac_peak_24418 | 12.80176 |                                                                                |
| 6 | 5744219 | 5744438 | KD2-H4K8ac_peak_24419 | 8.16133  |                                                                                |
| 6 | 5752793 | 5753132 | KD2-H4K8ac_peak_24420 | 6.66692  |                                                                                |
| 6 | 5938013 | 5938582 | KD2-H4K8ac_peak_24421 | 8.1718   |                                                                                |
| 6 | 7052073 | 7052475 | KD2-H4K8ac_peak_24422 | 5.57044  |                                                                                |
| 6 | 7107489 | 7107701 | KD2-H4K8ac_peak_24423 | 4.8402   | RREB1_ENSG00000124782                                                          |
| 6 | 7140991 | 7141245 | KD2-H4K8ac_peak_24424 | 8.5781   |                                                                                |

|   |          |          |                       |          |                                                                                                           |
|---|----------|----------|-----------------------|----------|-----------------------------------------------------------------------------------------------------------|
| 6 | 7314006  | 7314206  | KD2-H4K8ac_peak_24425 | 5.30799  |                                                                                                           |
| 6 | 7389651  | 7390436  | KD2-H4K8ac_peak_24426 | 9.89126  | CAGE1_ENSG00000164304;RIOK1_ENSG00000124784                                                               |
| 6 | 7468766  | 7469050  | KD2-H4K8ac_peak_24427 | 9.11031  |                                                                                                           |
| 6 | 7910120  | 7910412  | KD2-H4K8ac_peak_24428 | 10.41994 |                                                                                                           |
| 6 | 7911209  | 7911604  | KD2-H4K8ac_peak_24429 | 7.81657  |                                                                                                           |
| 6 | 8064133  | 8064570  | KD2-H4K8ac_peak_24430 | 12.82393 | BLOC1S5-TXNDC5_ENSG00000259040;BLOC1S5_ENSG00000188428                                                    |
| 6 | 8102152  | 8103133  | KD2-H4K8ac_peak_24431 | 9.11031  | EEF1E1-BLOC1S5_ENSG00000265818;EEF1E1_ENSG00000124802                                                     |
| 6 | 8237532  | 8237790  | KD2-H4K8ac_peak_24432 | 5.29555  |                                                                                                           |
| 6 | 8435479  | 8436360  | KD2-H4K8ac_peak_24433 | 14.55656 | SLC35B3_ENSG00000124786                                                                                   |
| 6 | 10404861 | 10405196 | KD2-H4K8ac_peak_24434 | 17.94825 |                                                                                                           |
| 6 | 10510937 | 10511133 | KD2-H4K8ac_peak_24435 | 6.16888  |                                                                                                           |
| 6 | 10659945 | 10660702 | KD2-H4K8ac_peak_24436 | 7.36799  |                                                                                                           |
| 6 | 10720387 | 10721200 | KD2-H4K8ac_peak_24437 | 8.28234  |                                                                                                           |
| 6 | 10723437 | 10723707 | KD2-H4K8ac_peak_24438 | 6.66099  | TMEM14C_ENSG00000111843                                                                                   |
| 6 | 10747387 | 10747748 | KD2-H4K8ac_peak_24439 | 4.98072  | RP11-421M1.8_ENSG00000272097;TMEM14B_ENSG00000137210;SYCP2L_ENSG00000153157;RP11-637O19.3_ENSG00000272162 |
| 6 | 11043920 | 11044505 | KD2-H4K8ac_peak_24440 | 8.17902  | ELOVL2_ENSG00000197977;ELOVL2-AS1_ENSG00000230314                                                         |
| 6 | 11094086 | 11094727 | KD2-H4K8ac_peak_24441 | 21.6161  | SMIM13_ENSG00000224531                                                                                    |
| 6 | 11537981 | 11538898 | KD2-H4K8ac_peak_24442 | 12.36441 | TMEM170B_ENSG00000205269                                                                                  |
| 6 | 12008520 | 12008805 | KD2-H4K8ac_peak_24443 | 5.835    | RP11-456H18.2_ENSG00000229896;HIVEP1_ENSG00000095951                                                      |
| 6 | 12011902 | 12012429 | KD2-H4K8ac_peak_24444 | 10.29344 |                                                                                                           |
| 6 | 12012622 | 12013113 | KD2-H4K8ac_peak_24445 | 5.14125  |                                                                                                           |
| 6 | 13328916 | 13329304 | KD2-H4K8ac_peak_24446 | 14.8083  | TBC1D7_ENSG00000145979                                                                                    |
| 6 | 13527226 | 13527692 | KD2-H4K8ac_peak_24447 | 4.211    |                                                                                                           |
| 6 | 13558679 | 13558981 | KD2-H4K8ac_peak_24448 | 4.211    |                                                                                                           |
| 6 | 13574463 | 13575514 | KD2-H4K8ac_peak_24449 | 13.9234  | SIRT5_ENSG00000124523                                                                                     |
| 6 | 13614963 | 13615219 | KD2-H4K8ac_peak_24450 | 6.25869  | RP1-223E5.4_ENSG00000261071;NOL7_ENSG00000225921                                                          |
| 6 | 13711620 | 13711997 | KD2-H4K8ac_peak_24451 | 10.95611 | RANBP9_ENSG0000010017                                                                                     |
| 6 | 13712207 | 13712597 | KD2-H4K8ac_peak_24452 | 6.25869  | RANBP9_ENSG0000010017                                                                                     |
| 6 | 13814073 | 13814753 | KD2-H4K8ac_peak_24453 | 17.55491 | MCUR1_ENSG00000050393                                                                                     |
| 6 | 13860221 | 13860756 | KD2-H4K8ac_peak_24454 | 4.42765  |                                                                                                           |
| 6 | 13873771 | 13874555 | KD2-H4K8ac_peak_24455 | 9.63487  |                                                                                                           |
| 6 | 13924226 | 13924424 | KD2-H4K8ac_peak_24456 | 5.43522  | RNF182_ENSG00000180537                                                                                    |
| 6 | 13924636 | 13925038 | KD2-H4K8ac_peak_24457 | 7.12754  | RNF182_ENSG00000180537                                                                                    |
| 6 | 14117414 | 14118365 | KD2-H4K8ac_peak_24458 | 19.77886 | CD83_ENSG00000112149                                                                                      |
| 6 | 14210960 | 14211273 | KD2-H4K8ac_peak_24459 | 11.90231 |                                                                                                           |
| 6 | 14211964 | 14212213 | KD2-H4K8ac_peak_24460 | 6.99815  |                                                                                                           |
| 6 | 14515887 | 14516124 | KD2-H4K8ac_peak_24461 | 5.04237  |                                                                                                           |
| 6 | 14519533 | 14519811 | KD2-H4K8ac_peak_24462 | 5.93446  |                                                                                                           |
| 6 | 14621598 | 14621831 | KD2-H4K8ac_peak_24463 | 5.6755   |                                                                                                           |
| 6 | 14694196 | 14694428 | KD2-H4K8ac_peak_24464 | 4.3015   |                                                                                                           |
| 6 | 15245072 | 15245433 | KD2-H4K8ac_peak_24465 | 3.86308  | RP11-560J1.2_ENSG00000271888                                                                              |
| 6 | 15245690 | 15246174 | KD2-H4K8ac_peak_24466 | 17.8868  | RP11-560J1.2_ENSG00000271888;JARID2_ENSG00000008083                                                       |
| 6 | 15338044 | 15338250 | KD2-H4K8ac_peak_24467 | 4.98318  |                                                                                                           |
| 6 | 15342435 | 15342636 | KD2-H4K8ac_peak_24468 | 10.21502 |                                                                                                           |
| 6 | 15662483 | 15662851 | KD2-H4K8ac_peak_24469 | 5.405    | DTNBP1_ENSG00000047579                                                                                    |
| 6 | 15663569 | 15663763 | KD2-H4K8ac_peak_24470 | 4.9025   | DTNBP1_ENSG00000047579                                                                                    |



|   |          |          |                       |          |                                                      |
|---|----------|----------|-----------------------|----------|------------------------------------------------------|
| 6 | 15880700 | 15880977 | KD2-H4K8ac_peak_24471 | 6.27931  |                                                      |
| 6 | 15883648 | 15883957 | KD2-H4K8ac_peak_24472 | 4.04247  |                                                      |
| 6 | 16129376 | 16129641 | KD2-H4K8ac_peak_24473 | 8.23274  | MYLIP_ENSG0000007944                                 |
| 6 | 16160059 | 16160267 | KD2-H4K8ac_peak_24474 | 7.51935  | RP1-13D10.2_ENSG00000218073                          |
| 6 | 16238596 | 16239040 | KD2-H4K8ac_peak_24475 | 5.57044  | GMPR_ENSG00000137198                                 |
| 6 | 16239705 | 16239936 | KD2-H4K8ac_peak_24476 | 10.25088 | GMPR_ENSG00000137198                                 |
| 6 | 16337893 | 16338250 | KD2-H4K8ac_peak_24477 | 8.05667  |                                                      |
| 6 | 16345665 | 16345930 | KD2-H4K8ac_peak_24478 | 4.66652  |                                                      |
| 6 | 16346334 | 16346640 | KD2-H4K8ac_peak_24479 | 6.90231  |                                                      |
| 6 | 16760659 | 16761086 | KD2-H4K8ac_peak_24480 | 17.70837 | ATXN1_ENSG00000124788;RP1-151F17.1_ENSG00000229931   |
| 6 | 17280747 | 17280990 | KD2-H4K8ac_peak_24481 | 6.16888  | RBM24_ENSG00000112183                                |
| 6 | 17282104 | 17282300 | KD2-H4K8ac_peak_24482 | 6.25869  | RBM24_ENSG00000112183                                |
| 6 | 17393470 | 17394301 | KD2-H4K8ac_peak_24483 | 7.27716  | CAP2_ENSG00000112186                                 |
| 6 | 17580887 | 17581267 | KD2-H4K8ac_peak_24484 | 6.84261  | SUMO2P13_ENSG00000218359                             |
| 6 | 17599873 | 17600344 | KD2-H4K8ac_peak_24485 | 4.42765  | FAM8A1_ENSG00000137414                               |
| 6 | 17600670 | 17601020 | KD2-H4K8ac_peak_24486 | 10.63441 | FAM8A1_ENSG00000137414                               |
| 6 | 17706394 | 17706920 | KD2-H4K8ac_peak_24487 | 5.13615  | NUP153_ENSG00000124789;RP11-500C11.3_ENSG00000272269 |
| 6 | 17708248 | 17708509 | KD2-H4K8ac_peak_24488 | 8.37043  |                                                      |
| 6 | 17987504 | 17987807 | KD2-H4K8ac_peak_24489 | 8.26945  | KIF13A_ENSG00000137177                               |
| 6 | 17988016 | 17988379 | KD2-H4K8ac_peak_24490 | 12.25733 | KIF13A_ENSG00000137177                               |
| 6 | 18155032 | 18155225 | KD2-H4K8ac_peak_24491 | 8.05667  | TPMT_ENSG00000137364;KDM1B_ENSG00000165097           |
| 6 | 18155758 | 18155977 | KD2-H4K8ac_peak_24492 | 5.4779   | TPMT_ENSG00000137364;KDM1B_ENSG00000165097           |
| 6 | 18264014 | 18264664 | KD2-H4K8ac_peak_24493 | 8.55552  | DEK_ENSG00000124795                                  |
| 6 | 18264918 | 18265529 | KD2-H4K8ac_peak_24494 | 4.211    | DEK_ENSG00000124795                                  |
| 6 | 19601022 | 19601235 | KD2-H4K8ac_peak_24495 | 5.07241  |                                                      |
| 6 | 20212297 | 20212640 | KD2-H4K8ac_peak_24496 | 15.52826 | MBOAT1_ENSG00000172197;RP11-239H6.2_ENSG00000227803  |
| 6 | 20402308 | 20403140 | KD2-H4K8ac_peak_24497 | 19.91242 | E2F3_ENSG00000112242                                 |
| 6 | 20403930 | 20404292 | KD2-H4K8ac_peak_24498 | 21.26856 |                                                      |
| 6 | 20534047 | 20534321 | KD2-H4K8ac_peak_24499 | 5.96828  | CDKAL1_ENSG00000145996                               |
| 6 | 20673852 | 20674181 | KD2-H4K8ac_peak_24500 | 4.01115  |                                                      |
| 6 | 20679340 | 20679563 | KD2-H4K8ac_peak_24501 | 6.16888  |                                                      |
| 6 | 20691241 | 20691508 | KD2-H4K8ac_peak_24502 | 6.16888  |                                                      |
| 6 | 21004935 | 21005141 | KD2-H4K8ac_peak_24503 | 6.66692  |                                                      |
| 6 | 21198968 | 21199255 | KD2-H4K8ac_peak_24504 | 4.37815  |                                                      |
| 6 | 21200887 | 21201106 | KD2-H4K8ac_peak_24505 | 9.55735  |                                                      |
| 6 | 21241090 | 21241434 | KD2-H4K8ac_peak_24506 | 5.57044  |                                                      |
| 6 | 21244290 | 21244580 | KD2-H4K8ac_peak_24507 | 8.30974  |                                                      |
| 6 | 21381958 | 21382607 | KD2-H4K8ac_peak_24508 | 8.17902  |                                                      |
| 6 | 21383206 | 21383425 | KD2-H4K8ac_peak_24509 | 6.66692  |                                                      |
| 6 | 21384679 | 21384954 | KD2-H4K8ac_peak_24510 | 9.98013  |                                                      |
| 6 | 21394726 | 21394929 | KD2-H4K8ac_peak_24511 | 4.77079  |                                                      |
| 6 | 21500747 | 21501498 | KD2-H4K8ac_peak_24512 | 7.33266  |                                                      |
| 6 | 21587104 | 21588955 | KD2-H4K8ac_peak_24513 | 14.27217 |                                                      |
| 6 | 21589235 | 21589524 | KD2-H4K8ac_peak_24514 | 6.09229  |                                                      |
| 6 | 21595130 | 21595322 | KD2-H4K8ac_peak_24515 | 7.47462  |                                                      |
| 6 | 21595582 | 21596135 | KD2-H4K8ac_peak_24516 | 5.75757  |                                                      |

|   |          |          |                       |          |                                                                             |
|---|----------|----------|-----------------------|----------|-----------------------------------------------------------------------------|
| 6 | 21665884 | 21666492 | KD2-H4K8ac_peak_24517 | 9.02573  | CASC15_ENSG00000272168                                                      |
| 6 | 21666691 | 21666955 | KD2-H4K8ac_peak_24518 | 8.10216  |                                                                             |
| 6 | 21667326 | 21667808 | KD2-H4K8ac_peak_24519 | 4.42765  |                                                                             |
| 6 | 21949643 | 21949982 | KD2-H4K8ac_peak_24520 | 6.9809   |                                                                             |
| 6 | 22000050 | 22000524 | KD2-H4K8ac_peak_24521 | 7.27716  |                                                                             |
| 6 | 22146967 | 22147597 | KD2-H4K8ac_peak_24522 | 8.30974  | CASC14_ENSG00000260455                                                      |
| 6 | 22148218 | 22148425 | KD2-H4K8ac_peak_24523 | 7.47462  | CASC14_ENSG00000260455                                                      |
| 6 | 22327153 | 22327420 | KD2-H4K8ac_peak_24524 | 12.06346 |                                                                             |
| 6 | 22363861 | 22364278 | KD2-H4K8ac_peak_24525 | 4.42765  |                                                                             |
| 6 | 22928106 | 22928338 | KD2-H4K8ac_peak_24526 | 13.39763 |                                                                             |
| 6 | 23004575 | 23004870 | KD2-H4K8ac_peak_24527 | 8.85813  |                                                                             |
| 6 | 23179802 | 23180184 | KD2-H4K8ac_peak_24528 | 6.07178  |                                                                             |
| 6 | 23180611 | 23180844 | KD2-H4K8ac_peak_24529 | 6.16888  |                                                                             |
| 6 | 23182972 | 23183197 | KD2-H4K8ac_peak_24530 | 7.12754  |                                                                             |
| 6 | 23281754 | 23282323 | KD2-H4K8ac_peak_24531 | 8.87298  |                                                                             |
| 6 | 23347703 | 23348257 | KD2-H4K8ac_peak_24532 | 11.89502 |                                                                             |
| 6 | 23412396 | 23412655 | KD2-H4K8ac_peak_24533 | 9.15329  |                                                                             |
| 6 | 23443317 | 23443746 | KD2-H4K8ac_peak_24534 | 8.17902  |                                                                             |
| 6 | 23444838 | 23445183 | KD2-H4K8ac_peak_24535 | 7.12754  |                                                                             |
| 6 | 23446113 | 23446342 | KD2-H4K8ac_peak_24536 | 6.16888  |                                                                             |
| 6 | 23446992 | 23447242 | KD2-H4K8ac_peak_24537 | 7.12754  |                                                                             |
| 6 | 23447532 | 23447834 | KD2-H4K8ac_peak_24538 | 6.16888  |                                                                             |
| 6 | 23523284 | 23523481 | KD2-H4K8ac_peak_24539 | 5.13615  |                                                                             |
| 6 | 23657436 | 23658132 | KD2-H4K8ac_peak_24540 | 8.28994  |                                                                             |
| 6 | 24191160 | 24191399 | KD2-H4K8ac_peak_24541 | 6.16888  |                                                                             |
| 6 | 24402613 | 24402960 | KD2-H4K8ac_peak_24542 | 4.42765  | MRS2_ENSG00000124532                                                        |
| 6 | 24403236 | 24403534 | KD2-H4K8ac_peak_24543 | 14.00658 | MRS2_ENSG00000124532                                                        |
| 6 | 24494919 | 24496046 | KD2-H4K8ac_peak_24544 | 9.89383  | GPLD1_ENSG00000112293;ALDH5A1_ENSG00000112294                               |
| 6 | 24631161 | 24631555 | KD2-H4K8ac_peak_24545 | 6.14257  |                                                                             |
| 6 | 24646576 | 24646935 | KD2-H4K8ac_peak_24546 | 11.30637 | KIAA0319_ENSG00000137261                                                    |
| 6 | 24666781 | 24667018 | KD2-H4K8ac_peak_24547 | 6.40297  | TDP2_ENSG00000111802;ACOT13_ENSG00000112304                                 |
| 6 | 24720545 | 24721005 | KD2-H4K8ac_peak_24548 | 10.0692  | C6orf62_ENSG00000112308                                                     |
| 6 | 24721757 | 24722214 | KD2-H4K8ac_peak_24549 | 9.1707   | C6orf62_ENSG00000112308                                                     |
| 6 | 24774722 | 24775418 | KD2-H4K8ac_peak_24550 | 7.76104  | GMNN_ENSG00000112312                                                        |
| 6 | 25121977 | 25122383 | KD2-H4K8ac_peak_24551 | 7.12754  |                                                                             |
| 6 | 25279298 | 25279794 | KD2-H4K8ac_peak_24552 | 5.59859  | LRRC16A_ENSG00000079691                                                     |
| 6 | 26020746 | 26021116 | KD2-H4K8ac_peak_24553 | 10.08707 | HIST1H3A_ENSG00000198366;HIST1H4A_ENSG00000196176                           |
| 6 | 26028945 | 26029165 | KD2-H4K8ac_peak_24554 | 7.70289  |                                                                             |
| 6 | 26043302 | 26043598 | KD2-H4K8ac_peak_24555 | 6.40683  | HIST1H2BB_ENSG00000196226;U91328.2_ENSG00000234816                          |
| 6 | 26044793 | 26045143 | KD2-H4K8ac_peak_24556 | 11.2938  | HIST1H2BB_ENSG00000196226;U91328.2_ENSG00000234816;HIST1H3C_ENSG00000196532 |
| 6 | 26057377 | 26057580 | KD2-H4K8ac_peak_24557 | 10.1591  | HIST1H1C_ENSG00000187837                                                    |
| 6 | 26123600 | 26124125 | KD2-H4K8ac_peak_24558 | 10.29344 | HIST1H2BC_ENSG00000180596;HIST1H2AC_ENSG00000180573                         |
| 6 | 26172537 | 26173015 | KD2-H4K8ac_peak_24559 | 5.01002  |                                                                             |
| 6 | 26184114 | 26184388 | KD2-H4K8ac_peak_24560 | 6.40683  | HIST1H2BE_ENSG00000197697                                                   |
| 6 | 26188444 | 26189055 | KD2-H4K8ac_peak_24561 | 5.71749  | HIST1H4D_ENSG00000188987                                                    |
| 6 | 26215690 | 26215926 | KD2-H4K8ac_peak_24562 | 5.07241  | HIST1H2BG_ENSG00000187990                                                   |

|   |          |          |                       |          |                                                                                |
|---|----------|----------|-----------------------|----------|--------------------------------------------------------------------------------|
| 6 | 26218048 | 26218704 | KD2-H4K8ac_peak_24563 | 8.45238  | HIST1H2AE_ENSG00000168274                                                      |
| 6 | 26234575 | 26234811 | KD2-H4K8ac_peak_24564 | 6.90231  | HIST1H1D_ENSG00000124575                                                       |
| 6 | 26249970 | 26250634 | KD2-H4K8ac_peak_24565 | 5.9696   | HIST1H3F_ENSG00000256316                                                       |
| 6 | 26272289 | 26272755 | KD2-H4K8ac_peak_24566 | 16.8184  | HIST1H3G_ENSG00000256018;HIST1H2APS4_ENSG00000218690;HIST1H2BI_ENSG00000168242 |
| 6 | 26364166 | 26364553 | KD2-H4K8ac_peak_24567 | 4.211    | BTN3A2_ENSG00000186470                                                         |
| 6 | 26383607 | 26384163 | KD2-H4K8ac_peak_24568 | 12.57828 | BTN2A2_ENSG00000124508                                                         |
| 6 | 26421109 | 26421415 | KD2-H4K8ac_peak_24569 | 14.43704 | BTN2A3P_ENSG00000124549                                                        |
| 6 | 26458239 | 26458605 | KD2-H4K8ac_peak_24570 | 11.05407 | BTN2A1_ENSG00000112763                                                         |
| 6 | 26473907 | 26474316 | KD2-H4K8ac_peak_24571 | 6.64891  |                                                                                |
| 6 | 26501706 | 26502063 | KD2-H4K8ac_peak_24572 | 8.1233   | BTN1A1_ENSG00000124557                                                         |
| 6 | 26520648 | 26520914 | KD2-H4K8ac_peak_24573 | 7.96194  | RNU6-502P_ENSG00000199289                                                      |
| 6 | 26537007 | 26537204 | KD2-H4K8ac_peak_24574 | 6.53915  |                                                                                |
| 6 | 26538361 | 26538918 | KD2-H4K8ac_peak_24575 | 12.76041 | HMG44_ENSG00000182952                                                          |
| 6 | 26550382 | 26551154 | KD2-H4K8ac_peak_24576 | 6.56211  |                                                                                |
| 6 | 26569364 | 26569670 | KD2-H4K8ac_peak_24577 | 5.25071  |                                                                                |
| 6 | 26572516 | 26572912 | KD2-H4K8ac_peak_24578 | 6.8836   |                                                                                |
| 6 | 26596198 | 26596449 | KD2-H4K8ac_peak_24579 | 10.21502 | ABT1_ENSG00000146109                                                           |
| 6 | 26597185 | 26597501 | KD2-H4K8ac_peak_24580 | 10.19949 | ABT1_ENSG00000146109                                                           |
| 6 | 26924458 | 26924708 | KD2-H4K8ac_peak_24581 | 29.60293 | GUSBP2_ENSG00000241549;LINC00240_ENSG00000224843                               |
| 6 | 26987507 | 26988042 | KD2-H4K8ac_peak_24582 | 16.09057 | TRNAI2_ENSG00000238621                                                         |
| 6 | 27094480 | 27094775 | KD2-H4K8ac_peak_24583 | 7.22457  |                                                                                |
| 6 | 27100066 | 27100357 | KD2-H4K8ac_peak_24584 | 11.15509 | HIST1H2BJ_ENSG00000124635;HIST1H2AG_ENSG00000196787                            |
| 6 | 27113260 | 27113685 | KD2-H4K8ac_peak_24585 | 7.12754  | HIST1H2BK_ENSG00000197903                                                      |
| 6 | 27114156 | 27114377 | KD2-H4K8ac_peak_24586 | 7.70289  | HIST1H2BK_ENSG00000197903;HIST1H2AH_ENSG00000184825                            |
| 6 | 27145264 | 27145856 | KD2-H4K8ac_peak_24587 | 10.21502 |                                                                                |
| 6 | 27146193 | 27146501 | KD2-H4K8ac_peak_24588 | 7.12754  |                                                                                |
| 6 | 27342648 | 27342862 | KD2-H4K8ac_peak_24589 | 8.5092   | ZNF391_ENSG00000124613                                                         |
| 6 | 27356201 | 27357279 | KD2-H4K8ac_peak_24590 | 8.58725  |                                                                                |
| 6 | 27440406 | 27440696 | KD2-H4K8ac_peak_24591 | 10.19949 | ZNF184_ENSG00000096654                                                         |
| 6 | 27655608 | 27655822 | KD2-H4K8ac_peak_24592 | 8.5781   |                                                                                |
| 6 | 27661425 | 27661642 | KD2-H4K8ac_peak_24593 | 5.71749  |                                                                                |
| 6 | 27706057 | 27706271 | KD2-H4K8ac_peak_24594 | 7.12754  | RP1-97D16.1_ENSG00000216915                                                    |
| 6 | 27740493 | 27740689 | KD2-H4K8ac_peak_24595 | 10.21502 |                                                                                |
| 6 | 27775309 | 27775579 | KD2-H4K8ac_peak_24596 | 6.25869  | HIST1H4PS1_ENSG00000217862;HIST1H2BL_ENSG00000185130;HIST1H2AI_ENSG00000196747 |
| 6 | 27783492 | 27784014 | KD2-H4K8ac_peak_24597 | 4.67342  | HIST1H2AJ_ENSG00000182611;HIST1H2BM_ENSG00000196374                            |
| 6 | 27794589 | 27794809 | KD2-H4K8ac_peak_24598 | 6.60096  |                                                                                |
| 6 | 27805379 | 27805984 | KD2-H4K8ac_peak_24599 | 10.19949 | HIST1H2AK_ENSG00000184348;HIST1H2BN_ENSG00000233822                            |
| 6 | 27833232 | 27833459 | KD2-H4K8ac_peak_24600 | 5.14125  | HIST1H2AL_ENSG00000198374                                                      |
| 6 | 27838007 | 27838204 | KD2-H4K8ac_peak_24601 | 5.60968  |                                                                                |
| 6 | 27840754 | 27841112 | KD2-H4K8ac_peak_24602 | 8.02571  | HIST1H3I_ENSG00000182572;HIST1H4L_ENSG00000198558                              |
| 6 | 27842900 | 27843157 | KD2-H4K8ac_peak_24603 | 6.31143  |                                                                                |
| 6 | 27859798 | 27860153 | KD2-H4K8ac_peak_24604 | 5.51783  | HIST1H3J_ENSG00000197153;HIST1H2AM_ENSG00000233224                             |
| 6 | 27870448 | 27870641 | KD2-H4K8ac_peak_24605 | 6.40683  |                                                                                |
| 6 | 28048012 | 28048225 | KD2-H4K8ac_peak_24606 | 4.35346  | RP1-313I6.12_ENSG00000272009;ZNF165_ENSG00000197279                            |
| 6 | 28048768 | 28048969 | KD2-H4K8ac_peak_24607 | 10.0746  | RP1-313I6.12_ENSG00000272009;ZNF165_ENSG00000197279                            |
| 6 | 28058836 | 28059224 | KD2-H4K8ac_peak_24608 | 3.75035  | ZSCAN12P1_ENSG00000219891                                                      |

|   |          |          |                       |          |                                                                    |
|---|----------|----------|-----------------------|----------|--------------------------------------------------------------------|
| 6 | 28072323 | 28072833 | KD2-H4K8ac_peak_24609 | 8.55271  |                                                                    |
| 6 | 28092366 | 28092687 | KD2-H4K8ac_peak_24610 | 11.70505 | ZSCAN16_ENSG00000196812                                            |
| 6 | 28104702 | 28105162 | KD2-H4K8ac_peak_24611 | 21.60865 | ZSCAN16-AS1_ENSG00000269293;RP1-265C24.8_ENSG00000261839           |
| 6 | 28109385 | 28109989 | KD2-H4K8ac_peak_24612 | 6.04107  | ZKSCAN8_ENSG00000198315                                            |
| 6 | 28129606 | 28129806 | KD2-H4K8ac_peak_24613 | 8.86099  | ZNF192P1_ENSG00000226314                                           |
| 6 | 28185993 | 28186659 | KD2-H4K8ac_peak_24614 | 10.05606 | TOB2P1_ENSG00000176933                                             |
| 6 | 28191939 | 28192251 | KD2-H4K8ac_peak_24615 | 9.15329  | ZSCAN9_ENSG00000137185                                             |
| 6 | 28193182 | 28193434 | KD2-H4K8ac_peak_24616 | 8.2413   | ZSCAN9_ENSG00000137185                                             |
| 6 | 28219411 | 28220018 | KD2-H4K8ac_peak_24617 | 12.42547 |                                                                    |
| 6 | 28220323 | 28220866 | KD2-H4K8ac_peak_24618 | 12.25733 |                                                                    |
| 6 | 28249076 | 28249712 | KD2-H4K8ac_peak_24619 | 11.70505 | PGBD1_ENSG00000137338                                              |
| 6 | 28302793 | 28303132 | KD2-H4K8ac_peak_24620 | 8.1233   |                                                                    |
| 6 | 28303486 | 28304180 | KD2-H4K8ac_peak_24621 | 14.15075 |                                                                    |
| 6 | 28317729 | 28317959 | KD2-H4K8ac_peak_24622 | 5.54647  | ZKSCAN3_ENSG00000189298                                            |
| 6 | 28410963 | 28411208 | KD2-H4K8ac_peak_24623 | 15.28177 | ZSCAN23_ENSG00000187987                                            |
| 6 | 28510042 | 28510808 | KD2-H4K8ac_peak_24624 | 9.11031  |                                                                    |
| 6 | 28554789 | 28555112 | KD2-H4K8ac_peak_24625 | 8.5092   | RP5-1186N24.3_ENSG00000246350                                      |
| 6 | 28565790 | 28566099 | KD2-H4K8ac_peak_24626 | 4.9025   |                                                                    |
| 6 | 28574753 | 28575124 | KD2-H4K8ac_peak_24627 | 4.42765  |                                                                    |
| 6 | 28589044 | 28589393 | KD2-H4K8ac_peak_24628 | 8.1233   |                                                                    |
| 6 | 28834142 | 28835053 | KD2-H4K8ac_peak_24629 | 6.65673  |                                                                    |
| 6 | 28890869 | 28891694 | KD2-H4K8ac_peak_24630 | 16.8435  | TRIM27_ENSG00000204713                                             |
| 6 | 28891915 | 28892301 | KD2-H4K8ac_peak_24631 | 8.23062  | TRIM27_ENSG00000204713                                             |
| 6 | 28948618 | 28948885 | KD2-H4K8ac_peak_24632 | 9.15329  |                                                                    |
| 6 | 28953733 | 28953966 | KD2-H4K8ac_peak_24633 | 6.40683  | HCG15_ENSG00000227214;HCG16_ENSG00000244349                        |
| 6 | 29595354 | 29595772 | KD2-H4K8ac_peak_24634 | 19.72117 |                                                                    |
| 6 | 29601092 | 29601348 | KD2-H4K8ac_peak_24635 | 10.96455 | GABBR1_ENSG00000204681                                             |
| 6 | 29617565 | 29617802 | KD2-H4K8ac_peak_24636 | 10.21502 |                                                                    |
| 6 | 29909945 | 29910137 | KD2-H4K8ac_peak_24637 | 12.42547 | HLA-A_ENSG00000206503;HCG4P5_ENSG00000227766                       |
| 6 | 29933037 | 29933262 | KD2-H4K8ac_peak_24638 | 6.76298  |                                                                    |
| 6 | 29944255 | 29944698 | KD2-H4K8ac_peak_24639 | 10.08707 |                                                                    |
| 6 | 30028530 | 30028898 | KD2-H4K8ac_peak_24640 | 4.42765  | ZNRD1-AS1_ENSG00000204623                                          |
| 6 | 30029152 | 30029504 | KD2-H4K8ac_peak_24641 | 6.05809  | ZNRD1-AS1_ENSG00000204623                                          |
| 6 | 30181463 | 30182282 | KD2-H4K8ac_peak_24642 | 12.00597 | TRIM26_ENSG00000234127                                             |
| 6 | 30226838 | 30228211 | KD2-H4K8ac_peak_24643 | 16.11042 | HLA-L_ENSG00000243753                                              |
| 6 | 30293944 | 30295400 | KD2-H4K8ac_peak_24644 | 28.31632 | HCG17_ENSG00000270604;HCG18_ENSG00000231074;TRIM39_ENSG00000204599 |
| 6 | 30313074 | 30313368 | KD2-H4K8ac_peak_24645 | 7.98621  | RPP21_ENSG00000241370                                              |
| 6 | 30457336 | 30457786 | KD2-H4K8ac_peak_24646 | 6.25869  | HLA-E_ENSG00000204592                                              |
| 6 | 30483825 | 30484142 | KD2-H4K8ac_peak_24647 | 4.14296  | XXbac-BPG249D20.9_ENSG00000235781                                  |
| 6 | 30524489 | 30525449 | KD2-H4K8ac_peak_24648 | 12.13241 | GNL1_ENSG00000204590;PRR3_ENSG00000204576                          |
| 6 | 30583788 | 30584101 | KD2-H4K8ac_peak_24649 | 8.23062  | AL662800.1_ENSG00000222894                                         |
| 6 | 30584526 | 30584756 | KD2-H4K8ac_peak_24650 | 9.51625  | AL662800.1_ENSG00000222894;MRPS18B_ENSG00000204568                 |
| 6 | 30585468 | 30585717 | KD2-H4K8ac_peak_24651 | 4.77079  | PPP1R10_ENSG00000204569;MRPS18B_ENSG00000204568                    |
| 6 | 30594709 | 30594971 | KD2-H4K8ac_peak_24652 | 9.36516  | ATAT1_ENSG00000137343                                              |
| 6 | 30614953 | 30615520 | KD2-H4K8ac_peak_24653 | 18.22876 | C6orf136_ENSG00000204564;AL662800.2_ENSG00000266183                |
| 6 | 30650067 | 30650291 | KD2-H4K8ac_peak_24654 | 4.95872  |                                                                    |

|   |          |          |                       |          |                                                                                  |
|---|----------|----------|-----------------------|----------|----------------------------------------------------------------------------------|
| 6 | 30654703 | 30654969 | KD2-H4K8ac_peak_24655 | 15.52826 | PPP1R18_ENSG00000146112                                                          |
| 6 | 30655254 | 30655751 | KD2-H4K8ac_peak_24656 | 11.92978 | PPP1R18_ENSG00000146112                                                          |
| 6 | 30658357 | 30658633 | KD2-H4K8ac_peak_24657 | 4.89656  | NRM_ENSG00000137404                                                              |
| 6 | 30684750 | 30684990 | KD2-H4K8ac_peak_24658 | 11.92978 | MDC1_ENSG00000137337                                                             |
| 6 | 30688620 | 30689004 | KD2-H4K8ac_peak_24659 | 12.5605  | TUBB_ENSG00000196230                                                             |
| 6 | 30709893 | 30710936 | KD2-H4K8ac_peak_24660 | 12.84642 | FLOT1_ENSG00000137312;XXbac-BPG252P9.10_ENSG00000272273                          |
| 6 | 30737364 | 30737633 | KD2-H4K8ac_peak_24661 | 8.00457  |                                                                                  |
| 6 | 30746919 | 30747227 | KD2-H4K8ac_peak_24662 | 6.60096  |                                                                                  |
| 6 | 30747537 | 30747745 | KD2-H4K8ac_peak_24663 | 4.42765  |                                                                                  |
| 6 | 30748134 | 30748480 | KD2-H4K8ac_peak_24664 | 6.63018  |                                                                                  |
| 6 | 30748794 | 30749625 | KD2-H4K8ac_peak_24665 | 16.58076 |                                                                                  |
| 6 | 30845302 | 30846087 | KD2-H4K8ac_peak_24666 | 11.05407 |                                                                                  |
| 6 | 30851310 | 30851927 | KD2-H4K8ac_peak_24667 | 8.16906  |                                                                                  |
| 6 | 30875288 | 30875672 | KD2-H4K8ac_peak_24668 | 6.24114  | RN7SL175P_ENSG00000264731;GTF2H4_ENSG00000213780;VAR2_ENSG00000137411            |
| 6 | 30882539 | 30882838 | KD2-H4K8ac_peak_24669 | 10.45683 |                                                                                  |
| 6 | 31164755 | 31165387 | KD2-H4K8ac_peak_24670 | 10.0692  | XXbac-BPG299F13.17_ENSG00000272501;HCG27_ENSG00000206344                         |
| 6 | 31239137 | 31239856 | KD2-H4K8ac_peak_24671 | 10.29344 | HLA-C_ENSG00000204525                                                            |
| 6 | 31509190 | 31509652 | KD2-H4K8ac_peak_24672 | 11.24422 | DDX39B_ENSG00000198563;SNORD84_ENSG00000265236;DDX39B-AS1_ENSG00000234006        |
| 6 | 31515537 | 31516156 | KD2-H4K8ac_peak_24673 | 7.76104  | ATP6V1G2_ENSG00000213760;NFKBIL1_ENSG00000204498                                 |
| 6 | 31548377 | 31549536 | KD2-H4K8ac_peak_24674 | 9.20193  | LTB_ENSG00000227507                                                              |
| 6 | 31587282 | 31587524 | KD2-H4K8ac_peak_24675 | 6.99815  | PRRC2A_ENSG00000204469                                                           |
| 6 | 31587889 | 31588099 | KD2-H4K8ac_peak_24676 | 14.00658 | PRRC2A_ENSG00000204469                                                           |
| 6 | 31588575 | 31589447 | KD2-H4K8ac_peak_24677 | 13.13969 | PRRC2A_ENSG00000204469                                                           |
| 6 | 31620928 | 31621135 | KD2-H4K8ac_peak_24678 | 5.71749  | BAG6_ENSG00000204463;APOM_ENSG00000204444                                        |
| 6 | 31621550 | 31621772 | KD2-H4K8ac_peak_24679 | 5.73839  |                                                                                  |
| 6 | 31628004 | 31628465 | KD2-H4K8ac_peak_24680 | 8.2413   | C6orf47_ENSG00000204439                                                          |
| 6 | 31632940 | 31633595 | KD2-H4K8ac_peak_24681 | 12.84642 | GPANK1_ENSG00000204438;CSNK2B_ENSG00000204435;CSNK2B-LY6G5B-1181_ENSG00000263020 |
| 6 | 31633890 | 31634255 | KD2-H4K8ac_peak_24682 | 9.36516  | GPANK1_ENSG00000204438;CSNK2B_ENSG00000204435;CSNK2B-LY6G5B-1181_ENSG00000263020 |
| 6 | 31648180 | 31648574 | KD2-H4K8ac_peak_24683 | 7.27716  |                                                                                  |
| 6 | 31648944 | 31649311 | KD2-H4K8ac_peak_24684 | 9.20193  |                                                                                  |
| 6 | 31671540 | 31672032 | KD2-H4K8ac_peak_24685 | 10.44656 | ABHD16A_ENSG00000204427                                                          |
| 6 | 31703987 | 31704579 | KD2-H4K8ac_peak_24686 | 9.19305  |                                                                                  |
| 6 | 31707096 | 31707321 | KD2-H4K8ac_peak_24687 | 7.22457  | CLIC1_ENSG00000213719;MSH5_ENSG00000204410;MSH5-SAPCD1_ENSG00000255152           |
| 6 | 31707876 | 31708763 | KD2-H4K8ac_peak_24688 | 5.9696   | CLIC1_ENSG00000213719;MSH5_ENSG00000204410;MSH5-SAPCD1_ENSG00000255152           |
| 6 | 31744878 | 31745082 | KD2-H4K8ac_peak_24689 | 9.51625  | VWA7_ENSG00000204396                                                             |
| 6 | 31762624 | 31763738 | KD2-H4K8ac_peak_24690 | 11.24702 | VAR2_ENSG00000204394                                                             |
| 6 | 31763937 | 31764287 | KD2-H4K8ac_peak_24691 | 9.26408  | VAR2_ENSG00000204394                                                             |
| 6 | 31774012 | 31774328 | KD2-H4K8ac_peak_24692 | 5.26591  | LSM2_ENSG00000204392                                                             |
| 6 | 31781637 | 31782004 | KD2-H4K8ac_peak_24693 | 6.85193  |                                                                                  |
| 6 | 31789233 | 31789587 | KD2-H4K8ac_peak_24694 | 8.1233   |                                                                                  |
| 6 | 31801761 | 31802254 | KD2-H4K8ac_peak_24695 | 9.1707   | C6orf48_ENSG00000204387;SNORD48_ENSG00000201823                                  |
| 6 | 31869324 | 31869884 | KD2-H4K8ac_peak_24696 | 13.9438  | ZBTB12_ENSG00000204366                                                           |
| 6 | 31870217 | 31870890 | KD2-H4K8ac_peak_24697 | 8.90387  | ZBTB12_ENSG00000204366                                                           |
| 6 | 31926200 | 31926669 | KD2-H4K8ac_peak_24698 | 10.09333 | NELFE_ENSG00000204356;SKIV2L_ENSG00000204351                                     |
| 6 | 31938677 | 31940888 | KD2-H4K8ac_peak_24699 | 17.16047 | DXO_ENSG00000204348;STK19_ENSG00000204344                                        |
| 6 | 32016160 | 32016457 | KD2-H4K8ac_peak_24700 | 4.42765  |                                                                                  |

|   |          |          |                       |          |                                                                       |
|---|----------|----------|-----------------------|----------|-----------------------------------------------------------------------|
| 6 | 32095695 | 32095905 | KD2-H4K8ac_peak_24701 | 5.54647  | ATF6B_ENSG00000213676                                                 |
| 6 | 32096599 | 32096941 | KD2-H4K8ac_peak_24702 | 5.14125  | ATF6B_ENSG00000213676                                                 |
| 6 | 32098573 | 32098863 | KD2-H4K8ac_peak_24703 | 10.0692  | FKBPL_ENSG00000204315                                                 |
| 6 | 32121511 | 32121718 | KD2-H4K8ac_peak_24704 | 10.05606 | PRRT1_ENSG00000204314;PPT2_ENSG00000221988;PPT2-EGFL8_ENSG00000258388 |
| 6 | 32121996 | 32122258 | KD2-H4K8ac_peak_24705 | 11.05407 | PRRT1_ENSG00000204314;PPT2_ENSG00000221988;PPT2-EGFL8_ENSG00000258388 |
| 6 | 32143468 | 32143778 | KD2-H4K8ac_peak_24706 | 13.09607 |                                                                       |
| 6 | 32144970 | 32145443 | KD2-H4K8ac_peak_24707 | 11.05056 | AGPAT1_ENSG00000204310;RNF5_ENSG00000204308                           |
| 6 | 32158117 | 32158501 | KD2-H4K8ac_peak_24708 | 8.55271  | PBX2_ENSG00000204304                                                  |
| 6 | 32162988 | 32163273 | KD2-H4K8ac_peak_24709 | 4.06758  | GPSM3_ENSG00000213654                                                 |
| 6 | 32163868 | 32164261 | KD2-H4K8ac_peak_24710 | 25.94184 | GPSM3_ENSG00000213654                                                 |
| 6 | 32164617 | 32165417 | KD2-H4K8ac_peak_24711 | 7.28628  |                                                                       |
| 6 | 32806316 | 32806549 | KD2-H4K8ac_peak_24712 | 15.53082 | TAP2_ENSG00000250264;TAP2_ENSG00000204267                             |
| 6 | 32861777 | 32862717 | KD2-H4K8ac_peak_24713 | 13.70753 |                                                                       |
| 6 | 32935841 | 32936240 | KD2-H4K8ac_peak_24714 | 16.01525 | HLA-DMA_ENSG00000204257;BRD2_ENSG00000204256                          |
| 6 | 32937135 | 32939075 | KD2-H4K8ac_peak_24715 | 7.11824  | HLA-DMA_ENSG00000204257;BRD2_ENSG00000204256;BRD2-IT1_ENSG00000223837 |
| 6 | 33129449 | 33129863 | KD2-H4K8ac_peak_24716 | 12.57297 |                                                                       |
| 6 | 33167925 | 33168434 | KD2-H4K8ac_peak_24717 | 10.05606 | RXRБ_ENSG00000204231;RNY4P10_ENSG00000202441;SLC39A7_ENSG00000112473  |
| 6 | 33172769 | 33172982 | KD2-H4K8ac_peak_24718 | 10.0692  | HSD17B8_ENSG00000204228                                               |
| 6 | 33175205 | 33176451 | KD2-H4K8ac_peak_24719 | 7.28628  | MIR219-1_ENSG00000199036;RING1_ENSG00000204227                        |
| 6 | 33181435 | 33181631 | KD2-H4K8ac_peak_24720 | 9.63487  |                                                                       |
| 6 | 33216469 | 33216922 | KD2-H4K8ac_peak_24721 | 5.14125  | HCG25_ENSG00000232940                                                 |
| 6 | 33238883 | 33239583 | KD2-H4K8ac_peak_24722 | 15.25814 | VPS52_ENSG00000223501;RPS18_ENSG00000231500                           |
| 6 | 33239939 | 33240265 | KD2-H4K8ac_peak_24723 | 10.05606 | VPS52_ENSG00000223501;RPS18_ENSG00000231500                           |
| 6 | 33244967 | 33245532 | KD2-H4K8ac_peak_24724 | 7.36799  | B3GALT4_ENSG00000235863                                               |
| 6 | 33257602 | 33257862 | KD2-H4K8ac_peak_24725 | 7.89389  | WDR46_ENSG00000227057;PFDN6_ENSG00000204220                           |
| 6 | 33266579 | 33267129 | KD2-H4K8ac_peak_24726 | 12.93209 |                                                                       |
| 6 | 33290090 | 33290286 | KD2-H4K8ac_peak_24727 | 6.69204  |                                                                       |
| 6 | 33291117 | 33291878 | KD2-H4K8ac_peak_24728 | 4.86324  |                                                                       |
| 6 | 33359709 | 33359920 | KD2-H4K8ac_peak_24729 | 8.2413   | KIFC1_ENSG00000237649                                                 |
| 6 | 33377664 | 33377898 | KD2-H4K8ac_peak_24730 | 4.86324  | PHF1_ENSG00000112511                                                  |
| 6 | 33378526 | 33379220 | KD2-H4K8ac_peak_24731 | 10.11379 | PHF1_ENSG00000112511                                                  |
| 6 | 33385369 | 33385563 | KD2-H4K8ac_peak_24732 | 6.30607  | CUTA_ENSG00000112514                                                  |
| 6 | 33386484 | 33386989 | KD2-H4K8ac_peak_24733 | 10.11379 | CUTA_ENSG00000112514;SYNGAP1_ENSG00000197283                          |
| 6 | 33392937 | 33393354 | KD2-H4K8ac_peak_24734 | 10.1591  |                                                                       |
| 6 | 33454092 | 33454366 | KD2-H4K8ac_peak_24735 | 6.40683  |                                                                       |
| 6 | 33539907 | 33540197 | KD2-H4K8ac_peak_24736 | 7.70289  |                                                                       |
| 6 | 33547612 | 33547900 | KD2-H4K8ac_peak_24737 | 8.16906  | BAK1_ENSG0000030110                                                   |
| 6 | 33553124 | 33553850 | KD2-H4K8ac_peak_24738 | 6.84261  |                                                                       |
| 6 | 33574743 | 33575104 | KD2-H4K8ac_peak_24739 | 6.25869  |                                                                       |
| 6 | 33575777 | 33576382 | KD2-H4K8ac_peak_24740 | 9.77606  |                                                                       |
| 6 | 33577793 | 33578517 | KD2-H4K8ac_peak_24741 | 10.46264 |                                                                       |
| 6 | 33578772 | 33579440 | KD2-H4K8ac_peak_24742 | 9.36516  |                                                                       |
| 6 | 33588493 | 33588962 | KD2-H4K8ac_peak_24743 | 18.29344 | ITPR3_ENSG00000096433                                                 |
| 6 | 33623405 | 33623667 | KD2-H4K8ac_peak_24744 | 9.68068  |                                                                       |
| 6 | 33624866 | 33625115 | KD2-H4K8ac_peak_24745 | 5.43522  |                                                                       |
| 6 | 33678551 | 33678840 | KD2-H4K8ac_peak_24746 | 5.51783  | UQCC2_ENSG00000137288                                                 |

|   |          |          |                       |          |                                                        |
|---|----------|----------|-----------------------|----------|--------------------------------------------------------|
| 6 | 33729551 | 33729948 | KD2-H4K8ac_peak_24747 | 5.14125  |                                                        |
| 6 | 33756139 | 33756379 | KD2-H4K8ac_peak_24748 | 6.99194  | LEMD2_ENSG00000161904                                  |
| 6 | 33756589 | 33756855 | KD2-H4K8ac_peak_24749 | 10.29842 | LEMD2_ENSG00000161904                                  |
| 6 | 33757351 | 33757607 | KD2-H4K8ac_peak_24750 | 3.90565  | LEMD2_ENSG00000161904                                  |
| 6 | 33783451 | 33783757 | KD2-H4K8ac_peak_24751 | 13.88933 |                                                        |
| 6 | 33811221 | 33811461 | KD2-H4K8ac_peak_24752 | 7.76335  |                                                        |
| 6 | 34122477 | 34122836 | KD2-H4K8ac_peak_24753 | 7.47462  | GRM4_ENSG00000124493                                   |
| 6 | 34164270 | 34164766 | KD2-H4K8ac_peak_24754 | 8.16906  |                                                        |
| 6 | 34191325 | 34191672 | KD2-H4K8ac_peak_24755 | 11.60333 |                                                        |
| 6 | 34192087 | 34192429 | KD2-H4K8ac_peak_24756 | 9.63487  |                                                        |
| 6 | 34204192 | 34204514 | KD2-H4K8ac_peak_24757 | 10.30284 | HMGA1_ENSG00000137309                                  |
| 6 | 34205388 | 34206049 | KD2-H4K8ac_peak_24758 | 13.95627 | HMGA1_ENSG00000137309                                  |
| 6 | 34216496 | 34216717 | KD2-H4K8ac_peak_24759 | 8.1235   | C6orf1_ENSG00000186577                                 |
| 6 | 34359635 | 34360306 | KD2-H4K8ac_peak_24760 | 15.82743 | NUDT3_ENSG00000272325                                  |
| 6 | 34393398 | 34393790 | KD2-H4K8ac_peak_24761 | 5.92591  | RPS10-NUDT3_ENSG00000270800;RPS10_ENSG00000124614      |
| 6 | 34394283 | 34394674 | KD2-H4K8ac_peak_24762 | 12.91654 | RPS10-NUDT3_ENSG00000270800;RPS10_ENSG00000124614      |
| 6 | 34433472 | 34433672 | KD2-H4K8ac_peak_24763 | 10.05606 | PACSIN1_ENSG00000124507                                |
| 6 | 34433910 | 34434190 | KD2-H4K8ac_peak_24764 | 4.66652  | PACSIN1_ENSG00000124507                                |
| 6 | 34482706 | 34482976 | KD2-H4K8ac_peak_24765 | 5.88845  |                                                        |
| 6 | 34493063 | 34494593 | KD2-H4K8ac_peak_24766 | 10.7186  |                                                        |
| 6 | 34664816 | 34665073 | KD2-H4K8ac_peak_24767 | 6.66692  | C6orf106_ENSG00000196821;RP11-140K17.3_ENSG00000272288 |
| 6 | 34677738 | 34678261 | KD2-H4K8ac_peak_24768 | 4.62507  |                                                        |
| 6 | 34724016 | 34724828 | KD2-H4K8ac_peak_24769 | 14.8083  | SNRPC_ENSG00000124562                                  |
| 6 | 34725316 | 34725531 | KD2-H4K8ac_peak_24770 | 12.06346 | SNRPC_ENSG00000124562                                  |
| 6 | 34759476 | 34760654 | KD2-H4K8ac_peak_24771 | 13.74404 | UHRF1BP1_ENSG00000065060                               |
| 6 | 34807406 | 34807735 | KD2-H4K8ac_peak_24772 | 4.211    |                                                        |
| 6 | 34856788 | 34857446 | KD2-H4K8ac_peak_24773 | 14.98936 | TAF11_ENSG00000064995;ANKS1A_ENSG00000064999           |
| 6 | 35226789 | 35227029 | KD2-H4K8ac_peak_24774 | 4.54037  | ZNF76_ENSG00000065029                                  |
| 6 | 35227583 | 35227785 | KD2-H4K8ac_peak_24775 | 16.40478 | ZNF76_ENSG00000065029                                  |
| 6 | 35286013 | 35286220 | KD2-H4K8ac_peak_24776 | 6.67092  |                                                        |
| 6 | 35286441 | 35286699 | KD2-H4K8ac_peak_24777 | 3.75035  |                                                        |
| 6 | 35420307 | 35420713 | KD2-H4K8ac_peak_24778 | 6.40683  | FANCE_ENSG00000112039                                  |
| 6 | 35435638 | 35436026 | KD2-H4K8ac_peak_24779 | 6.25869  | RPL10A_ENSG00000198755                                 |
| 6 | 35436227 | 35436731 | KD2-H4K8ac_peak_24780 | 9.63487  | RPL10A_ENSG00000198755                                 |
| 6 | 35464009 | 35464401 | KD2-H4K8ac_peak_24781 | 5.30799  | TEAD3_ENSG00000007866                                  |
| 6 | 35464959 | 35465587 | KD2-H4K8ac_peak_24782 | 13.21979 | TEAD3_ENSG00000007866                                  |
| 6 | 35499733 | 35500254 | KD2-H4K8ac_peak_24783 | 6.40683  |                                                        |
| 6 | 35501460 | 35502020 | KD2-H4K8ac_peak_24784 | 6.94954  |                                                        |
| 6 | 35503578 | 35503784 | KD2-H4K8ac_peak_24785 | 5.88845  |                                                        |
| 6 | 35656291 | 35656640 | KD2-H4K8ac_peak_24786 | 9.34195  |                                                        |
| 6 | 35687076 | 35688584 | KD2-H4K8ac_peak_24787 | 11.92978 |                                                        |
| 6 | 35695123 | 35696947 | KD2-H4K8ac_peak_24788 | 15.58442 | FKBP5_ENSG00000096060                                  |
| 6 | 35699463 | 35700045 | KD2-H4K8ac_peak_24789 | 8.4716   |                                                        |
| 6 | 35704819 | 35705373 | KD2-H4K8ac_peak_24790 | 15.53798 | RP3-510O8.4_ENSG00000232909;ARMC12_ENSG00000157343     |
| 6 | 35705587 | 35705942 | KD2-H4K8ac_peak_24791 | 6.66692  | RP3-510O8.4_ENSG00000232909;ARMC12_ENSG00000157343     |
| 6 | 35744247 | 35744915 | KD2-H4K8ac_peak_24792 | 18.29344 | CLPSL2_ENSG00000196748                                 |

|   |          |          |                       |          |                                                     |
|---|----------|----------|-----------------------|----------|-----------------------------------------------------|
| 6 | 35772925 | 35773295 | KD2-H4K8ac_peak_24793 | 4.86324  | LHFPL5_ENSG00000197753                              |
| 6 | 35888128 | 35888378 | KD2-H4K8ac_peak_24794 | 6.99815  | SRPK1_ENSG00000096063                               |
| 6 | 35889021 | 35889267 | KD2-H4K8ac_peak_24795 | 10.08707 | SRPK1_ENSG00000096063                               |
| 6 | 35995639 | 35995996 | KD2-H4K8ac_peak_24796 | 10.19949 | MAPK14_ENSG00000112062                              |
| 6 | 36098779 | 36099464 | KD2-H4K8ac_peak_24797 | 8.16906  |                                                     |
| 6 | 36099865 | 36100733 | KD2-H4K8ac_peak_24798 | 6.40297  |                                                     |
| 6 | 36164210 | 36164756 | KD2-H4K8ac_peak_24799 | 12.82393 | RP1-179N16.6_ENSG00000246982;BRPF3_ENSG00000096070  |
| 6 | 36213444 | 36213888 | KD2-H4K8ac_peak_24800 | 7.1181   |                                                     |
| 6 | 36309037 | 36309270 | KD2-H4K8ac_peak_24801 | 7.40633  |                                                     |
| 6 | 36328193 | 36328603 | KD2-H4K8ac_peak_24802 | 7.96322  |                                                     |
| 6 | 36409911 | 36410148 | KD2-H4K8ac_peak_24803 | 6.51023  | PXT1_ENSG00000179165;KCTD20_ENSG00000112078         |
| 6 | 36410909 | 36411250 | KD2-H4K8ac_peak_24804 | 5.54647  | PXT1_ENSG00000179165;KCTD20_ENSG00000112078         |
| 6 | 36514905 | 36515141 | KD2-H4K8ac_peak_24805 | 7.44324  | STK38_ENSG00000112079                               |
| 6 | 36515604 | 36516029 | KD2-H4K8ac_peak_24806 | 4.49837  | STK38_ENSG00000112079                               |
| 6 | 36602100 | 36602472 | KD2-H4K8ac_peak_24807 | 5.80056  |                                                     |
| 6 | 36605255 | 36605538 | KD2-H4K8ac_peak_24808 | 5.05318  |                                                     |
| 6 | 36617421 | 36617947 | KD2-H4K8ac_peak_24809 | 9.11031  |                                                     |
| 6 | 36634761 | 36635278 | KD2-H4K8ac_peak_24810 | 6.25869  |                                                     |
| 6 | 36644075 | 36644419 | KD2-H4K8ac_peak_24811 | 5.9696   | CDKN1A_ENSG00000124762                              |
| 6 | 36761637 | 36761869 | KD2-H4K8ac_peak_24812 | 4.24345  |                                                     |
| 6 | 36842195 | 36842778 | KD2-H4K8ac_peak_24813 | 15.13261 | PPIL1_ENSG00000137168                               |
| 6 | 36843181 | 36843550 | KD2-H4K8ac_peak_24814 | 3.75035  | PPIL1_ENSG00000137168                               |
| 6 | 36852988 | 36853490 | KD2-H4K8ac_peak_24815 | 5.57044  |                                                     |
| 6 | 36953620 | 36954517 | KD2-H4K8ac_peak_24816 | 12.30509 | MTCH1_ENSG00000137409                               |
| 6 | 36965550 | 36965789 | KD2-H4K8ac_peak_24817 | 4.81242  |                                                     |
| 6 | 37045036 | 37046064 | KD2-H4K8ac_peak_24818 | 11.92209 |                                                     |
| 6 | 37069932 | 37070181 | KD2-H4K8ac_peak_24819 | 9.1707   |                                                     |
| 6 | 37071068 | 37071385 | KD2-H4K8ac_peak_24820 | 4.42765  |                                                     |
| 6 | 37077524 | 37077953 | KD2-H4K8ac_peak_24821 | 4.95402  |                                                     |
| 6 | 37099071 | 37099339 | KD2-H4K8ac_peak_24822 | 5.9696   |                                                     |
| 6 | 37189560 | 37190487 | KD2-H4K8ac_peak_24823 | 11.2938  |                                                     |
| 6 | 37225636 | 37226261 | KD2-H4K8ac_peak_24824 | 9.34989  | TMEM217_ENSG00000172738;TBC1D22B_ENSG00000065491    |
| 6 | 37321291 | 37321608 | KD2-H4K8ac_peak_24825 | 5.25071  | RNF8_ENSG00000112130                                |
| 6 | 37321836 | 37322386 | KD2-H4K8ac_peak_24826 | 10.96455 | RNF8_ENSG00000112130                                |
| 6 | 37400243 | 37401382 | KD2-H4K8ac_peak_24827 | 13.95627 | CMTR1_ENSG00000137200                               |
| 6 | 37458151 | 37458805 | KD2-H4K8ac_peak_24828 | 7.96322  |                                                     |
| 6 | 37467327 | 37467523 | KD2-H4K8ac_peak_24829 | 5.9696   | CCDC167_ENSG00000198937                             |
| 6 | 37483411 | 37483742 | KD2-H4K8ac_peak_24830 | 6.65673  |                                                     |
| 6 | 37484048 | 37485085 | KD2-H4K8ac_peak_24831 | 6.66359  |                                                     |
| 6 | 37504125 | 37504517 | KD2-H4K8ac_peak_24832 | 6.99815  |                                                     |
| 6 | 37533079 | 37534151 | KD2-H4K8ac_peak_24833 | 8.83582  |                                                     |
| 6 | 37543597 | 37544018 | KD2-H4K8ac_peak_24834 | 7.83489  |                                                     |
| 6 | 37592730 | 37593573 | KD2-H4K8ac_peak_24835 | 9.67696  |                                                     |
| 6 | 37767996 | 37768428 | KD2-H4K8ac_peak_24836 | 10.43925 |                                                     |
| 6 | 37786113 | 37786732 | KD2-H4K8ac_peak_24837 | 3.90565  | RP3-441A12.1_ENSG00000225945;ZFAND3_ENSG00000156639 |
| 6 | 37786960 | 37787578 | KD2-H4K8ac_peak_24838 | 18.94636 | RP3-441A12.1_ENSG00000225945;ZFAND3_ENSG00000156639 |



|   |          |          |                       |          |                                                     |
|---|----------|----------|-----------------------|----------|-----------------------------------------------------|
| 6 | 37787993 | 37788195 | KD2-H4K8ac_peak_24839 | 8.30974  | RP3-441A12.1_ENSG00000225945;ZFAND3_ENSG00000156639 |
| 6 | 38023076 | 38023381 | KD2-H4K8ac_peak_24840 | 7.05877  |                                                     |
| 6 | 38137885 | 38138095 | KD2-H4K8ac_peak_24841 | 7.27716  |                                                     |
| 6 | 38235192 | 38235617 | KD2-H4K8ac_peak_24842 | 4.86824  |                                                     |
| 6 | 38325105 | 38325308 | KD2-H4K8ac_peak_24843 | 6.82976  |                                                     |
| 6 | 38326855 | 38327131 | KD2-H4K8ac_peak_24844 | 4.86324  | AL031905.1_ENSG00000238716                          |
| 6 | 38607023 | 38608040 | KD2-H4K8ac_peak_24845 | 7.73264  | BTBD9_ENSG00000183826                               |
| 6 | 38670400 | 38670875 | KD2-H4K8ac_peak_24846 | 19.09174 |                                                     |
| 6 | 38682906 | 38683346 | KD2-H4K8ac_peak_24847 | 4.67342  | RP3-503A6.2_ENSG00000236355;DNAH8_ENSG00000124721   |
| 6 | 38943123 | 38943366 | KD2-H4K8ac_peak_24848 | 6.64891  |                                                     |
| 6 | 39016069 | 39016892 | KD2-H4K8ac_peak_24849 | 18.94636 |                                                     |
| 6 | 39026667 | 39027609 | KD2-H4K8ac_peak_24850 | 7.27716  |                                                     |
| 6 | 39082604 | 39082813 | KD2-H4K8ac_peak_24851 | 7.36799  | SAYS1_ENSG00000112167                               |
| 6 | 39196916 | 39197558 | KD2-H4K8ac_peak_24852 | 11.70505 | KCNK5_ENSG00000164626                               |
| 6 | 39399472 | 39399790 | KD2-H4K8ac_peak_24853 | 9.89126  |                                                     |
| 6 | 39692865 | 39693102 | KD2-H4K8ac_peak_24854 | 9.16531  | KIF6_ENSG00000164627                                |
| 6 | 39693342 | 39693834 | KD2-H4K8ac_peak_24855 | 14.66631 | KIF6_ENSG00000164627                                |
| 6 | 39798419 | 39798646 | KD2-H4K8ac_peak_24856 | 4.65111  |                                                     |
| 6 | 39901865 | 39902435 | KD2-H4K8ac_peak_24857 | 10.43145 | MOC1_ENSG00000124615                                |
| 6 | 40317694 | 40317889 | KD2-H4K8ac_peak_24858 | 3.75035  |                                                     |
| 6 | 40374231 | 40374904 | KD2-H4K8ac_peak_24859 | 9.1707   | RNU6-250P_ENSG00000252767                           |
| 6 | 40377530 | 40377978 | KD2-H4K8ac_peak_24860 | 10.05606 |                                                     |
| 6 | 40378954 | 40379648 | KD2-H4K8ac_peak_24861 | 22.25031 |                                                     |
| 6 | 40392408 | 40393087 | KD2-H4K8ac_peak_24862 | 18.31034 |                                                     |
| 6 | 40404268 | 40404534 | KD2-H4K8ac_peak_24863 | 9.72244  |                                                     |
| 6 | 40405721 | 40406477 | KD2-H4K8ac_peak_24864 | 5.9696   |                                                     |
| 6 | 40407166 | 40407579 | KD2-H4K8ac_peak_24865 | 6.66692  |                                                     |
| 6 | 40410192 | 40410623 | KD2-H4K8ac_peak_24866 | 11.03331 |                                                     |
| 6 | 40411682 | 40411908 | KD2-H4K8ac_peak_24867 | 10.17486 |                                                     |
| 6 | 40445244 | 40445492 | KD2-H4K8ac_peak_24868 | 4.54838  |                                                     |
| 6 | 40452114 | 40452365 | KD2-H4K8ac_peak_24869 | 4.42765  |                                                     |
| 6 | 40458740 | 40458966 | KD2-H4K8ac_peak_24870 | 6.35295  |                                                     |
| 6 | 40467809 | 40468009 | KD2-H4K8ac_peak_24871 | 6.75488  |                                                     |
| 6 | 40478439 | 40478676 | KD2-H4K8ac_peak_24872 | 4.77079  |                                                     |
| 6 | 40535874 | 40536114 | KD2-H4K8ac_peak_24873 | 4.01115  |                                                     |
| 6 | 40554166 | 40554409 | KD2-H4K8ac_peak_24874 | 6.20982  | LRFN2_ENSG00000156564                               |
| 6 | 40598305 | 40599028 | KD2-H4K8ac_peak_24875 | 9.1707   |                                                     |
| 6 | 40639348 | 40639640 | KD2-H4K8ac_peak_24876 | 7.27716  |                                                     |
| 6 | 40674119 | 40674324 | KD2-H4K8ac_peak_24877 | 7.27716  |                                                     |
| 6 | 40686898 | 40687380 | KD2-H4K8ac_peak_24878 | 13.35153 |                                                     |
| 6 | 40687746 | 40687969 | KD2-H4K8ac_peak_24879 | 6.40297  |                                                     |
| 6 | 40688512 | 40688916 | KD2-H4K8ac_peak_24880 | 11.92978 |                                                     |
| 6 | 40689524 | 40690037 | KD2-H4K8ac_peak_24881 | 13.6476  |                                                     |
| 6 | 40722444 | 40722884 | KD2-H4K8ac_peak_24882 | 6.65673  |                                                     |
| 6 | 40764933 | 40765241 | KD2-H4K8ac_peak_24883 | 5.60968  |                                                     |
| 6 | 40837021 | 40837379 | KD2-H4K8ac_peak_24884 | 7.96322  |                                                     |

|   |          |          |                       |          |                                            |
|---|----------|----------|-----------------------|----------|--------------------------------------------|
| 6 | 40848714 | 40848970 | KD2-H4K8ac_peak_24885 | 8.88549  |                                            |
| 6 | 40854642 | 40854914 | KD2-H4K8ac_peak_24886 | 4.57371  |                                            |
| 6 | 40856427 | 40856684 | KD2-H4K8ac_peak_24887 | 6.00226  |                                            |
| 6 | 40858115 | 40858472 | KD2-H4K8ac_peak_24888 | 10.05606 |                                            |
| 6 | 40995474 | 40996507 | KD2-H4K8ac_peak_24889 | 12.82393 |                                            |
| 6 | 41039672 | 41040137 | KD2-H4K8ac_peak_24890 | 12.08081 | NFYA_ENSG00000001167                       |
| 6 | 41040944 | 41041402 | KD2-H4K8ac_peak_24891 | 12.93209 | NFYA_ENSG00000001167                       |
| 6 | 41395739 | 41395958 | KD2-H4K8ac_peak_24892 | 9.08816  |                                            |
| 6 | 41455949 | 41456189 | KD2-H4K8ac_peak_24893 | 5.30799  |                                            |
| 6 | 41456643 | 41457140 | KD2-H4K8ac_peak_24894 | 4.42765  |                                            |
| 6 | 41471525 | 41472440 | KD2-H4K8ac_peak_24895 | 13.81781 |                                            |
| 6 | 41487703 | 41487927 | KD2-H4K8ac_peak_24896 | 13.57066 |                                            |
| 6 | 41513383 | 41513762 | KD2-H4K8ac_peak_24897 | 14.80472 | FOXP4_ENSG00000137166                      |
| 6 | 41570633 | 41570878 | KD2-H4K8ac_peak_24898 | 4.211    |                                            |
| 6 | 41605032 | 41606024 | KD2-H4K8ac_peak_24899 | 14.72959 | MDFI_ENSG00000112559                       |
| 6 | 41606416 | 41606688 | KD2-H4K8ac_peak_24900 | 10.7186  |                                            |
| 6 | 41642909 | 41643159 | KD2-H4K8ac_peak_24901 | 6.30229  |                                            |
| 6 | 41702726 | 41703242 | KD2-H4K8ac_peak_24902 | 6.33462  | TFEB_ENSG00000112561                       |
| 6 | 41703581 | 41703927 | KD2-H4K8ac_peak_24903 | 6.2781   | TFEB_ENSG00000112561                       |
| 6 | 41748811 | 41749224 | KD2-H4K8ac_peak_24904 | 4.67342  | PRICKLE4_ENSG00000124593                   |
| 6 | 41753888 | 41754258 | KD2-H4K8ac_peak_24905 | 14.98936 | FRS3_ENSG00000137218                       |
| 6 | 41754494 | 41755266 | KD2-H4K8ac_peak_24906 | 8.16906  | FRS3_ENSG00000137218;TOMM6_ENSG00000214736 |
| 6 | 41755460 | 41755961 | KD2-H4K8ac_peak_24907 | 15.52826 | TOMM6_ENSG00000214736                      |
| 6 | 41862472 | 41862679 | KD2-H4K8ac_peak_24908 | 8.30974  | USP49_ENSG00000164663                      |
| 6 | 41888462 | 41888779 | KD2-H4K8ac_peak_24909 | 5.02474  | MED20_ENSG00000124641;BYSL_ENSG00000112578 |
| 6 | 41889013 | 41889870 | KD2-H4K8ac_peak_24910 | 14.98936 | MED20_ENSG00000124641;BYSL_ENSG00000112578 |
| 6 | 41909843 | 41910270 | KD2-H4K8ac_peak_24911 | 5.9696   |                                            |
| 6 | 42015819 | 42016969 | KD2-H4K8ac_peak_24912 | 12.74171 |                                            |
| 6 | 42017789 | 42018037 | KD2-H4K8ac_peak_24913 | 8.28994  | CCND3_ENSG00000112576;TAF8_ENSG00000137413 |
| 6 | 42018279 | 42018501 | KD2-H4K8ac_peak_24914 | 12.81138 | CCND3_ENSG00000112576;TAF8_ENSG00000137413 |
| 6 | 42086139 | 42086441 | KD2-H4K8ac_peak_24915 | 6.66692  |                                            |
| 6 | 42104471 | 42104798 | KD2-H4K8ac_peak_24916 | 12.42761 |                                            |
| 6 | 42104999 | 42105384 | KD2-H4K8ac_peak_24917 | 13.63179 |                                            |
| 6 | 42108998 | 42110178 | KD2-H4K8ac_peak_24918 | 10.29344 | C6orf132_ENSG00000188112                   |
| 6 | 42125941 | 42126230 | KD2-H4K8ac_peak_24919 | 5.13615  |                                            |
| 6 | 42134489 | 42134806 | KD2-H4K8ac_peak_24920 | 5.10505  |                                            |
| 6 | 42145612 | 42146482 | KD2-H4K8ac_peak_24921 | 11.79585 |                                            |
| 6 | 42185177 | 42185500 | KD2-H4K8ac_peak_24922 | 5.54647  | MRPS10_ENSG00000048544                     |
| 6 | 42419492 | 42419726 | KD2-H4K8ac_peak_24923 | 5.57044  | TRERF1_ENSG00000124496                     |
| 6 | 42420104 | 42420439 | KD2-H4K8ac_peak_24924 | 12.08081 | TRERF1_ENSG00000124496                     |
| 6 | 42421090 | 42421551 | KD2-H4K8ac_peak_24925 | 4.211    |                                            |
| 6 | 42500215 | 42500461 | KD2-H4K8ac_peak_24926 | 10.53596 |                                            |
| 6 | 42515558 | 42516068 | KD2-H4K8ac_peak_24927 | 9.1707   |                                            |
| 6 | 42531810 | 42532406 | KD2-H4K8ac_peak_24928 | 12.06346 | UBR2_ENSG00000024048                       |
| 6 | 42713251 | 42713666 | KD2-H4K8ac_peak_24929 | 8.55271  | TBCC_ENSG00000124659                       |
| 6 | 42714176 | 42714506 | KD2-H4K8ac_peak_24930 | 8.01894  | TBCC_ENSG00000124659                       |

|   |          |          |                       |          |                                                 |
|---|----------|----------|-----------------------|----------|-------------------------------------------------|
| 6 | 42715240 | 42715447 | KD2-H4K8ac_peak_24931 | 6.40683  | TBCC_ENSG00000124659                            |
| 6 | 42750356 | 42751766 | KD2-H4K8ac_peak_24932 | 37.36644 |                                                 |
| 6 | 42846553 | 42847201 | KD2-H4K8ac_peak_24933 | 8.02571  | RPL7L1_ENSG00000146223                          |
| 6 | 42847506 | 42848167 | KD2-H4K8ac_peak_24934 | 6.85193  | RPL7L1_ENSG00000146223                          |
| 6 | 42858289 | 42858522 | KD2-H4K8ac_peak_24935 | 13.48341 | C6orf226_ENSG00000221821                        |
| 6 | 42859023 | 42859480 | KD2-H4K8ac_peak_24936 | 5.9696   | C6orf226_ENSG00000221821                        |
| 6 | 42896060 | 42897561 | KD2-H4K8ac_peak_24937 | 12.82393 | CNPY3_ENSG00000137161                           |
| 6 | 42928650 | 42928847 | KD2-H4K8ac_peak_24938 | 6.66692  | GNMT_ENSG00000124713                            |
| 6 | 42946517 | 42947464 | KD2-H4K8ac_peak_24939 | 11.05467 | PEX6_ENSG00000124587                            |
| 6 | 42951664 | 42951995 | KD2-H4K8ac_peak_24940 | 7.95563  | PPP2R5D_ENSG00000112640                         |
| 6 | 42988603 | 42989233 | KD2-H4K8ac_peak_24941 | 9.20193  | RRP36_ENSG00000124541                           |
| 6 | 42989691 | 42990154 | KD2-H4K8ac_peak_24942 | 7.65815  | RRP36_ENSG00000124541                           |
| 6 | 43020981 | 43021594 | KD2-H4K8ac_peak_24943 | 13.80019 | CUL7_ENSG00000044090                            |
| 6 | 43026914 | 43027134 | KD2-H4K8ac_peak_24944 | 7.76329  | MRPL2_ENSG00000112651                           |
| 6 | 43027462 | 43027824 | KD2-H4K8ac_peak_24945 | 5.30799  | MRPL2_ENSG00000112651                           |
| 6 | 43043485 | 43043852 | KD2-H4K8ac_peak_24946 | 9.08816  | PTK7_ENSG00000112655                            |
| 6 | 43044624 | 43044983 | KD2-H4K8ac_peak_24947 | 8.59579  | PTK7_ENSG00000112655                            |
| 6 | 43082076 | 43082773 | KD2-H4K8ac_peak_24948 | 8.10216  |                                                 |
| 6 | 43083155 | 43083607 | KD2-H4K8ac_peak_24949 | 10.77174 |                                                 |
| 6 | 43087372 | 43087610 | KD2-H4K8ac_peak_24950 | 4.40093  |                                                 |
| 6 | 43089743 | 43090185 | KD2-H4K8ac_peak_24951 | 7.69287  |                                                 |
| 6 | 43090620 | 43091208 | KD2-H4K8ac_peak_24952 | 4.86324  |                                                 |
| 6 | 43091451 | 43092890 | KD2-H4K8ac_peak_24953 | 13.73635 |                                                 |
| 6 | 43093582 | 43093870 | KD2-H4K8ac_peak_24954 | 6.61611  |                                                 |
| 6 | 43110716 | 43111003 | KD2-H4K8ac_peak_24955 | 6.63018  |                                                 |
| 6 | 43149645 | 43150446 | KD2-H4K8ac_peak_24956 | 6.25869  | CUL9_ENSG00000112659                            |
| 6 | 43196507 | 43197608 | KD2-H4K8ac_peak_24957 | 23.83732 | DNPH1_ENSG00000112667                           |
| 6 | 43210962 | 43211751 | KD2-H4K8ac_peak_24958 | 23.38883 | TTBK1_ENSG00000146216                           |
| 6 | 43214673 | 43214990 | KD2-H4K8ac_peak_24959 | 11.60333 |                                                 |
| 6 | 43215293 | 43215589 | KD2-H4K8ac_peak_24960 | 8.55271  |                                                 |
| 6 | 43336516 | 43337368 | KD2-H4K8ac_peak_24961 | 8.10216  | ZNF318_ENSG00000171467                          |
| 6 | 43337592 | 43338063 | KD2-H4K8ac_peak_24962 | 10.05606 | ZNF318_ENSG00000171467                          |
| 6 | 43394520 | 43395910 | KD2-H4K8ac_peak_24963 | 15.039   | ABCC10_ENSG00000124574                          |
| 6 | 43444631 | 43444980 | KD2-H4K8ac_peak_24964 | 6.82976  | TJAP1_ENSG00000137221                           |
| 6 | 43478402 | 43478679 | KD2-H4K8ac_peak_24965 | 7.70289  | LRRRC73_ENSG00000204052;POLR1C_ENSG00000171453  |
| 6 | 43484258 | 43484621 | KD2-H4K8ac_peak_24966 | 13.9234  | YIPF3_ENSG00000137207                           |
| 6 | 43543344 | 43543707 | KD2-H4K8ac_peak_24967 | 8.85813  | XPO5_ENSG00000124571;POLH_ENSG00000170734       |
| 6 | 43596323 | 43596874 | KD2-H4K8ac_peak_24968 | 18.5703  | GTPBP2_ENSG00000172432;MAD2L1BP_ENSG00000124688 |
| 6 | 43597309 | 43597614 | KD2-H4K8ac_peak_24969 | 14.66631 | GTPBP2_ENSG00000172432;MAD2L1BP_ENSG00000124688 |
| 6 | 43598062 | 43598394 | KD2-H4K8ac_peak_24970 | 11.11809 | MAD2L1BP_ENSG00000124688                        |
| 6 | 43603128 | 43603478 | KD2-H4K8ac_peak_24971 | 12.79505 |                                                 |
| 6 | 43655179 | 43655962 | KD2-H4K8ac_peak_24972 | 10.05606 | MRPS18A_ENSG00000096080                         |
| 6 | 43682233 | 43682494 | KD2-H4K8ac_peak_24973 | 4.86324  |                                                 |
| 6 | 43683620 | 43684273 | KD2-H4K8ac_peak_24974 | 5.54647  |                                                 |
| 6 | 43736682 | 43736918 | KD2-H4K8ac_peak_24975 | 4.58615  |                                                 |
| 6 | 43739240 | 43740219 | KD2-H4K8ac_peak_24976 | 9.63487  | RP1-261G23.7_ENSG00000272114                    |

|   |          |          |                       |          |                                                             |
|---|----------|----------|-----------------------|----------|-------------------------------------------------------------|
| 6 | 43742861 | 43743290 | KD2-H4K8ac_peak_24977 | 10.0665  |                                                             |
| 6 | 43774963 | 43775434 | KD2-H4K8ac_peak_24978 | 4.86324  |                                                             |
| 6 | 43822588 | 43822956 | KD2-H4K8ac_peak_24979 | 5.80374  |                                                             |
| 6 | 43824135 | 43824568 | KD2-H4K8ac_peak_24980 | 10.58016 |                                                             |
| 6 | 43858569 | 43858764 | KD2-H4K8ac_peak_24981 | 4.77079  |                                                             |
| 6 | 43868435 | 43868770 | KD2-H4K8ac_peak_24982 | 6.99815  |                                                             |
| 6 | 43869121 | 43869386 | KD2-H4K8ac_peak_24983 | 7.47462  |                                                             |
| 6 | 43871081 | 43871363 | KD2-H4K8ac_peak_24984 | 5.88845  |                                                             |
| 6 | 43879013 | 43879248 | KD2-H4K8ac_peak_24985 | 5.88845  |                                                             |
| 6 | 43895006 | 43895297 | KD2-H4K8ac_peak_24986 | 6.35843  |                                                             |
| 6 | 43905192 | 43905916 | KD2-H4K8ac_peak_24987 | 8.5092   |                                                             |
| 6 | 43906363 | 43906731 | KD2-H4K8ac_peak_24988 | 9.1707   |                                                             |
| 6 | 43907055 | 43907456 | KD2-H4K8ac_peak_24989 | 9.16531  |                                                             |
| 6 | 43908926 | 43909520 | KD2-H4K8ac_peak_24990 | 7.76329  |                                                             |
| 6 | 43909882 | 43910120 | KD2-H4K8ac_peak_24991 | 5.08628  |                                                             |
| 6 | 43910417 | 43910722 | KD2-H4K8ac_peak_24992 | 7.95563  |                                                             |
| 6 | 43910945 | 43911290 | KD2-H4K8ac_peak_24993 | 9.36516  |                                                             |
| 6 | 43918801 | 43919022 | KD2-H4K8ac_peak_24994 | 6.27931  |                                                             |
| 6 | 43919480 | 43919750 | KD2-H4K8ac_peak_24995 | 6.25869  |                                                             |
| 6 | 43936093 | 43936331 | KD2-H4K8ac_peak_24996 | 6.13909  |                                                             |
| 6 | 43957223 | 43959333 | KD2-H4K8ac_peak_24997 | 11.02863 |                                                             |
| 6 | 43970357 | 43970834 | KD2-H4K8ac_peak_24998 | 6.43014  |                                                             |
| 6 | 43992466 | 43992839 | KD2-H4K8ac_peak_24999 | 6.83936  |                                                             |
| 6 | 44011291 | 44012214 | KD2-H4K8ac_peak_25000 | 7.76104  |                                                             |
| 6 | 44018321 | 44019792 | KD2-H4K8ac_peak_25001 | 10.96455 |                                                             |
| 6 | 44020144 | 44021096 | KD2-H4K8ac_peak_25002 | 7.146    |                                                             |
| 6 | 44021970 | 44022431 | KD2-H4K8ac_peak_25003 | 5.59859  |                                                             |
| 6 | 44022626 | 44022877 | KD2-H4K8ac_peak_25004 | 8.1235   |                                                             |
| 6 | 44024424 | 44025179 | KD2-H4K8ac_peak_25005 | 13.27022 |                                                             |
| 6 | 44040451 | 44040944 | KD2-H4K8ac_peak_25006 | 7.07117  | RP5-1120P11.3_ENSG00000231881                               |
| 6 | 44041420 | 44041860 | KD2-H4K8ac_peak_25007 | 5.3157   | RP5-1120P11.1_ENSG00000237686;RP5-1120P11.3_ENSG00000231881 |
| 6 | 44044638 | 44044981 | KD2-H4K8ac_peak_25008 | 12.74171 |                                                             |
| 6 | 44050692 | 44050932 | KD2-H4K8ac_peak_25009 | 8.14467  |                                                             |
| 6 | 44095431 | 44095653 | KD2-H4K8ac_peak_25010 | 9.06369  | MRPL14_ENSG00000180992;TMEM63B_ENSG00000137216              |
| 6 | 44186929 | 44187822 | KD2-H4K8ac_peak_25011 | 12.79505 | SLC29A1_ENSG00000112759                                     |
| 6 | 44204960 | 44205229 | KD2-H4K8ac_peak_25012 | 5.14125  |                                                             |
| 6 | 44205598 | 44205811 | KD2-H4K8ac_peak_25013 | 15.40891 |                                                             |
| 6 | 44213367 | 44214111 | KD2-H4K8ac_peak_25014 | 10.05606 | HSP90AB1_ENSG00000096384                                    |
| 6 | 44214344 | 44214587 | KD2-H4K8ac_peak_25015 | 7.36799  | HSP90AB1_ENSG00000096384                                    |
| 6 | 44215038 | 44215381 | KD2-H4K8ac_peak_25016 | 4.52514  | HSP90AB1_ENSG00000096384                                    |
| 6 | 44224890 | 44225102 | KD2-H4K8ac_peak_25017 | 8.55271  | SLC35B2_ENSG00000157593                                     |
| 6 | 44233102 | 44233823 | KD2-H4K8ac_peak_25018 | 6.25869  | NFKBIE_ENSG00000146232                                      |
| 6 | 44237866 | 44238089 | KD2-H4K8ac_peak_25019 | 13.11967 | TMEM151B_ENSG00000178233                                    |
| 6 | 44238422 | 44239038 | KD2-H4K8ac_peak_25020 | 8.02571  | TMEM151B_ENSG00000178233                                    |
| 6 | 44280836 | 44281064 | KD2-H4K8ac_peak_25021 | 8.85813  | AARS2_ENSG00000124608                                       |
| 6 | 44310198 | 44310875 | KD2-H4K8ac_peak_25022 | 18.94636 | SPATS1_ENSG00000249481                                      |

|   |          |          |                       |          |                                                    |
|---|----------|----------|-----------------------|----------|----------------------------------------------------|
| 6 | 44355401 | 44355644 | KD2-H4K8ac_peak_25023 | 8.55271  | CDC5L_ENSG00000096401                              |
| 6 | 44683205 | 44683501 | KD2-H4K8ac_peak_25024 | 8.80225  |                                                    |
| 6 | 45345281 | 45345587 | KD2-H4K8ac_peak_25025 | 11.09936 | SUPT3H_ENSG00000196284                             |
| 6 | 45345975 | 45346450 | KD2-H4K8ac_peak_25026 | 4.211    | SUPT3H_ENSG00000196284                             |
| 6 | 47205603 | 47205844 | KD2-H4K8ac_peak_25027 | 7.51935  |                                                    |
| 6 | 47209700 | 47209961 | KD2-H4K8ac_peak_25028 | 8.17902  |                                                    |
| 6 | 47277160 | 47277440 | KD2-H4K8ac_peak_25029 | 6.8836   | TNFRSF21_ENSG00000146072                           |
| 6 | 47445038 | 47445332 | KD2-H4K8ac_peak_25030 | 6.83936  | RP11-385F7.1_ENSG00000270761;CD2AP_ENSG00000198087 |
| 6 | 48036118 | 48036345 | KD2-H4K8ac_peak_25031 | 6.16888  | PTCHD4_ENSG00000244694                             |
| 6 | 49430497 | 49430914 | KD2-H4K8ac_peak_25032 | 14.74047 | MUT_ENSG00000146085;CENPQ_ENSG00000031691          |
| 6 | 50692339 | 50692577 | KD2-H4K8ac_peak_25033 | 5.57044  |                                                    |
| 6 | 50787268 | 50788074 | KD2-H4K8ac_peak_25034 | 16.57619 | TFAP2B_ENSG00000008196                             |
| 6 | 50788710 | 50788963 | KD2-H4K8ac_peak_25035 | 6.25869  |                                                    |
| 6 | 50789850 | 50790432 | KD2-H4K8ac_peak_25036 | 10.08874 |                                                    |
| 6 | 50790634 | 50791621 | KD2-H4K8ac_peak_25037 | 12.93209 |                                                    |
| 6 | 50793483 | 50794121 | KD2-H4K8ac_peak_25038 | 10.72656 |                                                    |
| 6 | 50816985 | 50817315 | KD2-H4K8ac_peak_25039 | 4.211    |                                                    |
| 6 | 50817719 | 50818786 | KD2-H4K8ac_peak_25040 | 13.74404 |                                                    |
| 6 | 50857322 | 50857563 | KD2-H4K8ac_peak_25041 | 4.37708  |                                                    |
| 6 | 50858416 | 50858663 | KD2-H4K8ac_peak_25042 | 5.25071  |                                                    |
| 6 | 50903031 | 50903322 | KD2-H4K8ac_peak_25043 | 6.25869  |                                                    |
| 6 | 50904909 | 50905123 | KD2-H4K8ac_peak_25044 | 8.17902  |                                                    |
| 6 | 51124846 | 51125049 | KD2-H4K8ac_peak_25045 | 7.01964  |                                                    |
| 6 | 51125796 | 51126292 | KD2-H4K8ac_peak_25046 | 6.16888  |                                                    |
| 6 | 51128980 | 51129244 | KD2-H4K8ac_peak_25047 | 9.15329  |                                                    |
| 6 | 51130091 | 51130582 | KD2-H4K8ac_peak_25048 | 7.27716  |                                                    |
| 6 | 51418534 | 51418751 | KD2-H4K8ac_peak_25049 | 10.53377 |                                                    |
| 6 | 51445210 | 51445436 | KD2-H4K8ac_peak_25050 | 7.12754  |                                                    |
| 6 | 51474444 | 51474652 | KD2-H4K8ac_peak_25051 | 5.25071  |                                                    |
| 6 | 51540783 | 51541019 | KD2-H4K8ac_peak_25052 | 16.32216 |                                                    |
| 6 | 51544499 | 51544767 | KD2-H4K8ac_peak_25053 | 7.27716  |                                                    |
| 6 | 51682271 | 51682753 | KD2-H4K8ac_peak_25054 | 7.87794  |                                                    |
| 6 | 51708061 | 51708418 | KD2-H4K8ac_peak_25055 | 7.91974  |                                                    |
| 6 | 51814419 | 51814679 | KD2-H4K8ac_peak_25056 | 4.01115  |                                                    |
| 6 | 51857402 | 51857674 | KD2-H4K8ac_peak_25057 | 6.25869  |                                                    |
| 6 | 51873832 | 51874136 | KD2-H4K8ac_peak_25058 | 12.3187  |                                                    |
| 6 | 51880372 | 51880928 | KD2-H4K8ac_peak_25059 | 6.40683  |                                                    |
| 6 | 51881153 | 51881364 | KD2-H4K8ac_peak_25060 | 9.15329  |                                                    |
| 6 | 51882142 | 51882442 | KD2-H4K8ac_peak_25061 | 5.9696   |                                                    |
| 6 | 51883436 | 51883663 | KD2-H4K8ac_peak_25062 | 7.12754  |                                                    |
| 6 | 51885100 | 51885465 | KD2-H4K8ac_peak_25063 | 6.16888  |                                                    |
| 6 | 52149085 | 52149473 | KD2-H4K8ac_peak_25064 | 6.65673  | MCM3_ENSG00000112118                               |
| 6 | 52226961 | 52227721 | KD2-H4K8ac_peak_25065 | 7.11824  | PAQR8_ENSG00000170915                              |
| 6 | 52284612 | 52284838 | KD2-H4K8ac_peak_25066 | 8.79106  | EFHC1_ENSG00000096093                              |
| 6 | 52377190 | 52377507 | KD2-H4K8ac_peak_25067 | 6.75638  |                                                    |
| 6 | 52382937 | 52383190 | KD2-H4K8ac_peak_25068 | 8.04448  |                                                    |

|   |           |           |                       |          |                                                                                        |
|---|-----------|-----------|-----------------------|----------|----------------------------------------------------------------------------------------|
| 6 | 52411911  | 52412238  | KD2-H4K8ac_peak_25069 | 8.1718   |                                                                                        |
| 6 | 52416862  | 52417132  | KD2-H4K8ac_peak_25070 | 4.211    |                                                                                        |
| 6 | 52436223  | 52436512  | KD2-H4K8ac_peak_25071 | 4.01115  |                                                                                        |
| 6 | 52441663  | 52442473  | KD2-H4K8ac_peak_25072 | 18.54875 | TRAM2_ENSG00000065308;TRAM2-AS1_ENSG00000225791                                        |
| 6 | 52461575  | 52461796  | KD2-H4K8ac_peak_25073 | 6.94954  |                                                                                        |
| 6 | 52529289  | 52529481  | KD2-H4K8ac_peak_25074 | 6.66692  | RP1-152L7.5_ENSG00000216775                                                            |
| 6 | 52535357  | 52536328  | KD2-H4K8ac_peak_25075 | 14.15075 | TMEM14A_ENSG00000096092                                                                |
| 6 | 52859544  | 52859861  | KD2-H4K8ac_peak_25076 | 7.40314  | GSTA4_ENSG00000170899;RN7SK_ENSG00000202198                                            |
| 6 | 52926191  | 52926606  | KD2-H4K8ac_peak_25077 | 13.80019 | ICK_ENSG00000112144                                                                    |
| 6 | 52930371  | 52930630  | KD2-H4K8ac_peak_25078 | 8.85813  |                                                                                        |
| 6 | 53213049  | 53213688  | KD2-H4K8ac_peak_25079 | 4.54006  | ELOVL5_ENSG00000012660                                                                 |
| 6 | 53223653  | 53224183  | KD2-H4K8ac_peak_25080 | 18.86697 |                                                                                        |
| 6 | 53409233  | 53409749  | KD2-H4K8ac_peak_25081 | 5.30799  |                                                                                        |
| 6 | 53413050  | 53413549  | KD2-H4K8ac_peak_25082 | 12.05219 |                                                                                        |
| 6 | 53469146  | 53469349  | KD2-H4K8ac_peak_25083 | 8.1233   |                                                                                        |
| 6 | 53516357  | 53517411  | KD2-H4K8ac_peak_25084 | 6.85193  |                                                                                        |
| 6 | 53658857  | 53659049  | KD2-H4K8ac_peak_25085 | 6.64891  | RP13-476E20.1_ENSG00000228614;LRRC1_ENSG00000137269                                    |
| 6 | 53659267  | 53659548  | KD2-H4K8ac_peak_25086 | 13.56049 | RP13-476E20.1_ENSG00000228614;LRRC1_ENSG00000137269                                    |
| 6 | 53659862  | 53660099  | KD2-H4K8ac_peak_25087 | 7.13615  | RP13-476E20.1_ENSG00000228614;LRRC1_ENSG00000137269                                    |
| 6 | 56707921  | 56708410  | KD2-H4K8ac_peak_25088 | 10.43145 | RP11-472M19.2_ENSG00000231441                                                          |
| 6 | 56708717  | 56709042  | KD2-H4K8ac_peak_25089 | 11.92209 | RP11-472M19.2_ENSG00000231441                                                          |
| 6 | 56716074  | 56716307  | KD2-H4K8ac_peak_25090 | 9.1707   |                                                                                        |
| 6 | 56819076  | 56820169  | KD2-H4K8ac_peak_25091 | 14.56955 | DST_ENSG00000151914;BEND6_ENSG00000151917                                              |
| 6 | 57037176  | 57037797  | KD2-H4K8ac_peak_25092 | 11.92978 | BAG2_ENSG00000112208                                                                   |
| 6 | 57086741  | 57086968  | KD2-H4K8ac_peak_25093 | 8.4716   | RAB23_ENSG00000112210                                                                  |
| 6 | 58287421  | 58287649  | KD2-H4K8ac_peak_25094 | 12.06346 | LINC00680_ENSG00000215190                                                              |
| 6 | 58287966  | 58288599  | KD2-H4K8ac_peak_25095 | 9.15329  | LINC00680_ENSG00000215190                                                              |
| 6 | 64282627  | 64283293  | KD2-H4K8ac_peak_25096 | 5.01002  | RP5-1148A21.3_ENSG00000266680                                                          |
| 6 | 64346293  | 64346569  | KD2-H4K8ac_peak_25097 | 8.23274  | PHF3_ENSG00000118482                                                                   |
| 6 | 70311266  | 70311556  | KD2-H4K8ac_peak_25098 | 5.13341  |                                                                                        |
| 6 | 70506416  | 70507583  | KD2-H4K8ac_peak_25099 | 10.58496 | LMBRD1_ENSG00000168216                                                                 |
| 6 | 70577304  | 70577621  | KD2-H4K8ac_peak_25100 | 8.26945  | COL19A1_ENSG00000082293                                                                |
| 6 | 711122511 | 711122746 | KD2-H4K8ac_peak_25101 | 9.08816  | RP11-462G2.2_ENSG00000224349;FAM135A_ENSG00000082269                                   |
| 6 | 71123299  | 71123800  | KD2-H4K8ac_peak_25102 | 6.97919  | RP11-462G2.2_ENSG00000224349;FAM135A_ENSG00000082269                                   |
| 6 | 71275965  | 71276307  | KD2-H4K8ac_peak_25103 | 7.22457  | C6orf57_ENSG00000154079                                                                |
| 6 | 71276692  | 71277046  | KD2-H4K8ac_peak_25104 | 8.85813  | C6orf57_ENSG00000154079                                                                |
| 6 | 71376709  | 71377253  | KD2-H4K8ac_peak_25105 | 5.71749  | SMAP1_ENSG00000112305                                                                  |
| 6 | 71997795  | 71998398  | KD2-H4K8ac_peak_25106 | 14.68449 | OGFRL1_ENSG00000119900                                                                 |
| 6 | 71998593  | 71999076  | KD2-H4K8ac_peak_25107 | 13.81781 | OGFRL1_ENSG00000119900                                                                 |
| 6 | 72596895  | 72597097  | KD2-H4K8ac_peak_25108 | 6.99815  | RIMS1_ENSG00000079841                                                                  |
| 6 | 72926307  | 72926619  | KD2-H4K8ac_peak_25109 | 8.00457  |                                                                                        |
| 6 | 73331422  | 73331740  | KD2-H4K8ac_peak_25110 | 7.1181   | KCNQ5_ENSG00000185760                                                                  |
| 6 | 73331992  | 73332463  | KD2-H4K8ac_peak_25111 | 14.69065 | KCNQ5_ENSG00000185760                                                                  |
| 6 | 73332831  | 73333062  | KD2-H4K8ac_peak_25112 | 10.21502 |                                                                                        |
| 6 | 73972932  | 73973445  | KD2-H4K8ac_peak_25113 | 16.32216 | AC019205.1_ENSG00000263378;RP11-257K9.8_ENSG00000243501;RP11-398K22.12_ENSG00000229852 |
| 6 | 74008795  | 74009729  | KD2-H4K8ac_peak_25114 | 8.4716   |                                                                                        |

|   |          |          |                       |          |                                             |
|---|----------|----------|-----------------------|----------|---------------------------------------------|
| 6 | 74161207 | 74162252 | KD2-H4K8ac_peak_25115 | 12.80176 | MB21D1_ENSG00000164430                      |
| 6 | 74170917 | 74171140 | KD2-H4K8ac_peak_25116 | 8.30974  | MTO1_ENSG00000135297                        |
| 6 | 74171502 | 74171873 | KD2-H4K8ac_peak_25117 | 15.7388  | MTO1_ENSG00000135297                        |
| 6 | 74230160 | 74230714 | KD2-H4K8ac_peak_25118 | 8.85813  |                                             |
| 6 | 74231152 | 74231552 | KD2-H4K8ac_peak_25119 | 24.19623 |                                             |
| 6 | 74289062 | 74289371 | KD2-H4K8ac_peak_25120 | 9.15329  |                                             |
| 6 | 74363302 | 74363537 | KD2-H4K8ac_peak_25121 | 11.1952  | SLC17A5_ENSG00000119899                     |
| 6 | 76058617 | 76059594 | KD2-H4K8ac_peak_25122 | 11.70505 |                                             |
| 6 | 76311271 | 76312505 | KD2-H4K8ac_peak_25123 | 7.28628  | SENPE6_ENSG00000112701                      |
| 6 | 76458321 | 76458731 | KD2-H4K8ac_peak_25124 | 5.01002  | MYO6_ENSG00000196586                        |
| 6 | 79576824 | 79577088 | KD2-H4K8ac_peak_25125 | 8.17902  | IRAK1BP1_ENSG00000146243                    |
| 6 | 79577295 | 79577609 | KD2-H4K8ac_peak_25126 | 11.2938  | IRAK1BP1_ENSG00000146243                    |
| 6 | 79786965 | 79787265 | KD2-H4K8ac_peak_25127 | 7.27716  | PHIP_ENSG00000146247                        |
| 6 | 79787745 | 79788844 | KD2-H4K8ac_peak_25128 | 10.96455 | PHIP_ENSG00000146247                        |
| 6 | 80487883 | 80488496 | KD2-H4K8ac_peak_25129 | 9.50015  |                                             |
| 6 | 80518717 | 80518934 | KD2-H4K8ac_peak_25130 | 4.49837  |                                             |
| 6 | 80520823 | 80521039 | KD2-H4K8ac_peak_25131 | 7.36799  |                                             |
| 6 | 80521563 | 80522224 | KD2-H4K8ac_peak_25132 | 7.40633  |                                             |
| 6 | 80579480 | 80579887 | KD2-H4K8ac_peak_25133 | 11.30637 |                                             |
| 6 | 80657462 | 80657681 | KD2-H4K8ac_peak_25134 | 13.81781 | ELOVL4_ENSG00000118402                      |
| 6 | 80713905 | 80714138 | KD2-H4K8ac_peak_25135 | 9.96798  | TTK_ENSG00000112742                         |
| 6 | 80816461 | 80816757 | KD2-H4K8ac_peak_25136 | 10.96455 | BCKDHB_ENSG00000083123                      |
| 6 | 80921080 | 80921508 | KD2-H4K8ac_peak_25137 | 4.86324  |                                             |
| 6 | 82463284 | 82463590 | KD2-H4K8ac_peak_25138 | 5.45396  | FAM46A_ENSG00000112773                      |
| 6 | 82750180 | 82750390 | KD2-H4K8ac_peak_25139 | 7.27716  |                                             |
| 6 | 82957150 | 82958007 | KD2-H4K8ac_peak_25140 | 7.07117  | IBTK_ENSG00000005700                        |
| 6 | 83775356 | 83775924 | KD2-H4K8ac_peak_25141 | 5.9696   | UBE3D_ENSG00000118420                       |
| 6 | 83902611 | 83902866 | KD2-H4K8ac_peak_25142 | 8.1233   | PGM3_ENSG00000013375;RWDD2A_ENSG00000013392 |
| 6 | 84140415 | 84141388 | KD2-H4K8ac_peak_25143 | 20.02161 | ME1_ENSG00000065833                         |
| 6 | 84322265 | 84322541 | KD2-H4K8ac_peak_25144 | 9.15329  |                                             |
| 6 | 84325885 | 84326345 | KD2-H4K8ac_peak_25145 | 4.77079  |                                             |
| 6 | 84417938 | 84418360 | KD2-H4K8ac_peak_25146 | 4.44527  |                                             |
| 6 | 84563047 | 84563767 | KD2-H4K8ac_peak_25147 | 10.96455 | RIPPLY2_ENSG00000203877                     |
| 6 | 84729682 | 84729941 | KD2-H4K8ac_peak_25148 | 4.86824  |                                             |
| 6 | 84737111 | 84737335 | KD2-H4K8ac_peak_25149 | 6.8836   |                                             |
| 6 | 84743256 | 84744064 | KD2-H4K8ac_peak_25150 | 20.02161 | MRAP2_ENSG00000135324                       |
| 6 | 84937423 | 84937880 | KD2-H4K8ac_peak_25151 | 8.74596  | KIAA1009_ENSG00000135315                    |
| 6 | 86302865 | 86303450 | KD2-H4K8ac_peak_25152 | 5.01002  | SNX14_ENSG00000135317                       |
| 6 | 86303792 | 86304216 | KD2-H4K8ac_peak_25153 | 10.96455 | SNX14_ENSG00000135317                       |
| 6 | 86351954 | 86352486 | KD2-H4K8ac_peak_25154 | 11.79585 |                                             |
| 6 | 86352766 | 86353061 | KD2-H4K8ac_peak_25155 | 16.48166 | SYNCRIP_ENSG00000135316                     |
| 6 | 86353430 | 86353939 | KD2-H4K8ac_peak_25156 | 6.40683  | SYNCRIP_ENSG00000135316                     |
| 6 | 86387953 | 86388270 | KD2-H4K8ac_peak_25157 | 5.49367  | SNHG5_ENSG00000203875                       |
| 6 | 86388828 | 86389099 | KD2-H4K8ac_peak_25158 | 9.08816  | SNHG5_ENSG00000203875                       |
| 6 | 87246636 | 87246833 | KD2-H4K8ac_peak_25159 | 5.14125  |                                             |
| 6 | 87305207 | 87305523 | KD2-H4K8ac_peak_25160 | 6.16888  |                                             |

|   |          |          |                       |          |                                                     |
|---|----------|----------|-----------------------|----------|-----------------------------------------------------|
| 6 | 87647039 | 87647686 | KD2-H4K8ac_peak_25161 | 8.10216  | HTR1E_ENSG00000168830                               |
| 6 | 87861530 | 87862347 | KD2-H4K8ac_peak_25162 | 12.08081 | ZNF292_ENSG00000188994                              |
| 6 | 87864641 | 87864879 | KD2-H4K8ac_peak_25163 | 5.15777  | RP11-393I2.4_ENSG00000272008                        |
| 6 | 87865294 | 87866018 | KD2-H4K8ac_peak_25164 | 30.13194 | RP11-393I2.4_ENSG00000272008                        |
| 6 | 88031459 | 88031915 | KD2-H4K8ac_peak_25165 | 7.47462  | SMIM8_ENSG00000111850;RP1-102H19.8_ENSG00000226524  |
| 6 | 88032370 | 88032659 | KD2-H4K8ac_peak_25166 | 9.11031  | SMIM8_ENSG00000111850;RP1-102H19.8_ENSG00000226524  |
| 6 | 88182449 | 88182920 | KD2-H4K8ac_peak_25167 | 13.73635 |                                                     |
| 6 | 88411045 | 88411907 | KD2-H4K8ac_peak_25168 | 12.17278 | AKIRIN2_ENSG00000135334                             |
| 6 | 88875723 | 88876915 | KD2-H4K8ac_peak_25169 | 10.05606 | CNR1_ENSG00000118432                                |
| 6 | 89672906 | 89673232 | KD2-H4K8ac_peak_25170 | 6.45083  | RNGTT_ENSG00000111880                               |
| 6 | 89790796 | 89791122 | KD2-H4K8ac_peak_25171 | 7.40314  | RP11-63L7.5_ENSG00000271931;PNRC1_ENSG00000146278   |
| 6 | 89827104 | 89827663 | KD2-H4K8ac_peak_25172 | 11.79585 | SRSF12_ENSG00000154548                              |
| 6 | 89827914 | 89828331 | KD2-H4K8ac_peak_25173 | 6.30229  | SRSF12_ENSG00000154548                              |
| 6 | 89855575 | 89856388 | KD2-H4K8ac_peak_25174 | 8.58725  | PM20D2_ENSG00000146281                              |
| 6 | 90062170 | 90063302 | KD2-H4K8ac_peak_25175 | 15.58442 | UBE2J1_ENSG00000198833                              |
| 6 | 90121897 | 90122672 | KD2-H4K8ac_peak_25176 | 11.03331 | RRAGD_ENSG00000025039                               |
| 6 | 90122912 | 90123149 | KD2-H4K8ac_peak_25177 | 5.20908  | RRAGD_ENSG00000025039                               |
| 6 | 90142466 | 90142692 | KD2-H4K8ac_peak_25178 | 5.75452  | ANKRD6_ENSG00000135299                              |
| 6 | 90142935 | 90143291 | KD2-H4K8ac_peak_25179 | 4.84794  | ANKRD6_ENSG00000135299                              |
| 6 | 90240291 | 90240501 | KD2-H4K8ac_peak_25180 | 5.52329  |                                                     |
| 6 | 90245675 | 90246324 | KD2-H4K8ac_peak_25181 | 7.27716  |                                                     |
| 6 | 90348240 | 90348434 | KD2-H4K8ac_peak_25182 | 7.76104  | LYRM2_ENSG00000083099                               |
| 6 | 90529070 | 90529454 | KD2-H4K8ac_peak_25183 | 5.42867  | MDN1_ENSG00000112159                                |
| 6 | 90529676 | 90530004 | KD2-H4K8ac_peak_25184 | 4.67342  | MDN1_ENSG00000112159                                |
| 6 | 90538366 | 90539075 | KD2-H4K8ac_peak_25185 | 6.40297  | CASP8AP2_ENSG00000118412                            |
| 6 | 90539634 | 90539898 | KD2-H4K8ac_peak_25186 | 11.05467 | CASP8AP2_ENSG00000118412                            |
| 6 | 90555825 | 90556057 | KD2-H4K8ac_peak_25187 | 6.07178  |                                                     |
| 6 | 90689740 | 90690253 | KD2-H4K8ac_peak_25188 | 9.1707   |                                                     |
| 6 | 90695356 | 90695899 | KD2-H4K8ac_peak_25189 | 19.31583 |                                                     |
| 6 | 90696941 | 90697151 | KD2-H4K8ac_peak_25190 | 5.43522  |                                                     |
| 6 | 90734732 | 90734935 | KD2-H4K8ac_peak_25191 | 8.79106  |                                                     |
| 6 | 90856866 | 90857260 | KD2-H4K8ac_peak_25192 | 7.27716  |                                                     |
| 6 | 91006881 | 91007334 | KD2-H4K8ac_peak_25193 | 14.56955 | BACH2_ENSG00000112182                               |
| 6 | 91149585 | 91150233 | KD2-H4K8ac_peak_25194 | 12.42547 |                                                     |
| 6 | 91150548 | 91150970 | KD2-H4K8ac_peak_25195 | 6.40683  |                                                     |
| 6 | 91296462 | 91296963 | KD2-H4K8ac_peak_25196 | 11.05467 | MAP3K7_ENSG00000135341                              |
| 6 | 96025431 | 96026265 | KD2-H4K8ac_peak_25197 | 10.0692  | MANEA-AS1_ENSG00000261366;MANEA_ENSG00000172469     |
| 6 | 96463224 | 96463653 | KD2-H4K8ac_peak_25198 | 6.66692  | FUT9_ENSG00000172461                                |
| 6 | 96463884 | 96464561 | KD2-H4K8ac_peak_25199 | 7.45501  | FUT9_ENSG00000172461                                |
| 6 | 96969728 | 96970185 | KD2-H4K8ac_peak_25200 | 10.29344 | UFL1-AS1_ENSG00000233797;UFL1_ENSG00000014123       |
| 6 | 97285444 | 97285957 | KD2-H4K8ac_peak_25201 | 18.5703  | GPR63_ENSG00000112218                               |
| 6 | 97345390 | 97345584 | KD2-H4K8ac_peak_25202 | 9.96798  | NDUFAF4_ENSG00000123545                             |
| 6 | 97371791 | 97372312 | KD2-H4K8ac_peak_25203 | 10.19949 | KLHL32_ENSG00000186231                              |
| 6 | 97731323 | 97731523 | KD2-H4K8ac_peak_25204 | 8.74596  | MMS22L_ENSG00000146263;RP3-418C23.2_ENSG00000226684 |
| 6 | 98994745 | 98995393 | KD2-H4K8ac_peak_25205 | 7.47462  |                                                     |
| 6 | 99282728 | 99282932 | KD2-H4K8ac_peak_25206 | 6.83936  | POU3F2_ENSG00000184486                              |



|   |           |          |                       |          |                                                     |
|---|-----------|----------|-----------------------|----------|-----------------------------------------------------|
| 6 | 99290416  | 99290794 | KD2-H4K8ac_peak_25207 | 4.73064  |                                                     |
| 6 | 99293010  | 99293447 | KD2-H4K8ac_peak_25208 | 9.65086  |                                                     |
| 6 | 99395260  | 99395822 | KD2-H4K8ac_peak_25209 | 14.74047 | FBXL4_ENSG00000112234                               |
| 6 | 99796788  | 99797899 | KD2-H4K8ac_peak_25210 | 8.4716   | FAXC_ENSG00000146267                                |
| 6 | 99841632  | 99842433 | KD2-H4K8ac_peak_25211 | 6.66692  | COQ3_ENSG00000132423                                |
| 6 | 99872815  | 99873083 | KD2-H4K8ac_peak_25212 | 11.05407 | PNISR_ENSG00000132424;RP11-98I9.4_ENSG00000228506   |
| 6 | 99873369  | 99873844 | KD2-H4K8ac_peak_25213 | 12.80176 | PNISR_ENSG00000132424;RP11-98I9.4_ENSG00000228506   |
| 6 | 99962946  | 99963243 | KD2-H4K8ac_peak_25214 | 6.66692  |                                                     |
| 6 | 99968970  | 99969327 | KD2-H4K8ac_peak_25215 | 7.76104  | USP45_ENSG00000123552;TSTD3_ENSG00000228439         |
| 6 | 100016033 | 1E+08    | KD2-H4K8ac_peak_25216 | 11.2938  | CCNC_ENSG00000112237;RP1-199J3.7_ENSG00000272017    |
| 6 | 100017116 | 1E+08    | KD2-H4K8ac_peak_25217 | 7.79898  | CCNC_ENSG00000112237                                |
| 6 | 101328853 | 1.01E+08 | KD2-H4K8ac_peak_25218 | 8.23274  | ASCC3_ENSG00000112249;RP3-467N11.1_ENSG00000260000  |
| 6 | 101846514 | 1.02E+08 | KD2-H4K8ac_peak_25219 | 9.97423  | GRIK2_ENSG00000164418                               |
| 6 | 101850227 | 1.02E+08 | KD2-H4K8ac_peak_25220 | 10.46874 |                                                     |
| 6 | 102837852 | 1.03E+08 | KD2-H4K8ac_peak_25221 | 6.16888  |                                                     |
| 6 | 104249993 | 1.04E+08 | KD2-H4K8ac_peak_25222 | 5.14125  |                                                     |
| 6 | 104432219 | 1.04E+08 | KD2-H4K8ac_peak_25223 | 5.25071  |                                                     |
| 6 | 105307146 | 1.05E+08 | KD2-H4K8ac_peak_25224 | 13.34404 | HACE1_ENSG00000085382;RP11-809N15.3_ENSG00000271099 |
| 6 | 105308623 | 1.05E+08 | KD2-H4K8ac_peak_25225 | 6.86699  | HACE1_ENSG00000085382;RP11-809N15.3_ENSG00000271099 |
| 6 | 105388541 | 1.05E+08 | KD2-H4K8ac_peak_25226 | 11.05467 | LINC00577_ENSG00000203809                           |
| 6 | 105584050 | 1.06E+08 | KD2-H4K8ac_peak_25227 | 10.96455 | BVES_ENSG00000112276;BVES-AS1_ENSG00000203808       |
| 6 | 105585207 | 1.06E+08 | KD2-H4K8ac_peak_25228 | 12.93253 | BVES_ENSG00000112276                                |
| 6 | 105627470 | 1.06E+08 | KD2-H4K8ac_peak_25229 | 15.06766 | AL359709.1_ENSG00000221544;POPCDC3_ENSG00000132429  |
| 6 | 105769237 | 1.06E+08 | KD2-H4K8ac_peak_25230 | 3.89889  |                                                     |
| 6 | 105850551 | 1.06E+08 | KD2-H4K8ac_peak_25231 | 7.76104  | PREP_ENSG00000085377                                |
| 6 | 105851200 | 1.06E+08 | KD2-H4K8ac_peak_25232 | 6.25869  | PREP_ENSG00000085377                                |
| 6 | 106440602 | 1.06E+08 | KD2-H4K8ac_peak_25233 | 4.77079  |                                                     |
| 6 | 106773216 | 1.07E+08 | KD2-H4K8ac_peak_25234 | 8.10216  | ATG5_ENSG00000057663                                |
| 6 | 106773817 | 1.07E+08 | KD2-H4K8ac_peak_25235 | 8.5092   | ATG5_ENSG00000057663                                |
| 6 | 106808059 | 1.07E+08 | KD2-H4K8ac_peak_25236 | 11.15509 | RP11-404H14.1_ENSG00000233941                       |
| 6 | 107077149 | 1.07E+08 | KD2-H4K8ac_peak_25237 | 11.97761 | RTN4IP1_ENSG00000130347;QRSL1_ENSG00000130348       |
| 6 | 107367715 | 1.07E+08 | KD2-H4K8ac_peak_25238 | 7.12754  |                                                     |
| 6 | 107435912 | 1.07E+08 | KD2-H4K8ac_peak_25239 | 9.63487  | BEND3_ENSG00000178409                               |
| 6 | 107440330 | 1.07E+08 | KD2-H4K8ac_peak_25240 | 4.9025   |                                                     |
| 6 | 107781055 | 1.08E+08 | KD2-H4K8ac_peak_25241 | 9.63487  | PDSS2_ENSG00000164494                               |
| 6 | 107810622 | 1.08E+08 | KD2-H4K8ac_peak_25242 | 9.51625  | SOBP_ENSG00000112320                                |
| 6 | 107860201 | 1.08E+08 | KD2-H4K8ac_peak_25243 | 7.27716  |                                                     |
| 6 | 107978835 | 1.08E+08 | KD2-H4K8ac_peak_25244 | 4.54006  |                                                     |
| 6 | 107991562 | 1.08E+08 | KD2-H4K8ac_peak_25245 | 6.40683  |                                                     |
| 6 | 107992328 | 1.08E+08 | KD2-H4K8ac_peak_25246 | 12.2054  |                                                     |
| 6 | 107996485 | 1.08E+08 | KD2-H4K8ac_peak_25247 | 13.09607 |                                                     |
| 6 | 108034664 | 1.08E+08 | KD2-H4K8ac_peak_25248 | 4.0528   |                                                     |
| 6 | 108169650 | 1.08E+08 | KD2-H4K8ac_peak_25249 | 13.70605 |                                                     |
| 6 | 108274848 | 1.08E+08 | KD2-H4K8ac_peak_25250 | 6.8836   |                                                     |
| 6 | 108278906 | 1.08E+08 | KD2-H4K8ac_peak_25251 | 7.79898  | SEC63_ENSG00000025796;RP1-191J18.66_ENSG00000272476 |
| 6 | 108279652 | 1.08E+08 | KD2-H4K8ac_peak_25252 | 9.73431  | SEC63_ENSG00000025796                               |

|   |           |          |                       |          |                                                      |
|---|-----------|----------|-----------------------|----------|------------------------------------------------------|
| 6 | 108454958 | 1.08E+08 | KD2-H4K8ac_peak_25253 | 17.43561 |                                                      |
| 6 | 108455863 | 1.08E+08 | KD2-H4K8ac_peak_25254 | 6.16888  |                                                      |
| 6 | 108478555 | 1.08E+08 | KD2-H4K8ac_peak_25255 | 12.57865 |                                                      |
| 6 | 108581801 | 1.09E+08 | KD2-H4K8ac_peak_25256 | 5.59859  | SNX3_ENSG00000112335                                 |
| 6 | 108583012 | 1.09E+08 | KD2-H4K8ac_peak_25257 | 12.60983 | SNX3_ENSG00000112335                                 |
| 6 | 108616009 | 1.09E+08 | KD2-H4K8ac_peak_25258 | 14.84212 | LACE1_ENSG00000135537                                |
| 6 | 108878981 | 1.09E+08 | KD2-H4K8ac_peak_25259 | 4.44748  |                                                      |
| 6 | 108880494 | 1.09E+08 | KD2-H4K8ac_peak_25260 | 4.91674  | FOXO3_ENSG00000118689                                |
| 6 | 108881143 | 1.09E+08 | KD2-H4K8ac_peak_25261 | 8.02571  | FOXO3_ENSG00000118689                                |
| 6 | 108882194 | 1.09E+08 | KD2-H4K8ac_peak_25262 | 7.19807  |                                                      |
| 6 | 108976678 | 1.09E+08 | KD2-H4K8ac_peak_25263 | 10.2048  |                                                      |
| 6 | 108982094 | 1.09E+08 | KD2-H4K8ac_peak_25264 | 10.96455 |                                                      |
| 6 | 109117500 | 1.09E+08 | KD2-H4K8ac_peak_25265 | 5.57044  |                                                      |
| 6 | 109119121 | 1.09E+08 | KD2-H4K8ac_peak_25266 | 11.89502 |                                                      |
| 6 | 109119986 | 1.09E+08 | KD2-H4K8ac_peak_25267 | 3.97079  |                                                      |
| 6 | 109126915 | 1.09E+08 | KD2-H4K8ac_peak_25268 | 5.91443  |                                                      |
| 6 | 109703208 | 1.1E+08  | KD2-H4K8ac_peak_25269 | 7.81657  | CD164_ENSG00000135535;RP11-425D10.10_ENSG00000260273 |
| 6 | 109762068 | 1.1E+08  | KD2-H4K8ac_peak_25270 | 11.92978 | PPIL6_ENSG00000185250;SMPD2_ENSG00000135587          |
| 6 | 109775919 | 1.1E+08  | KD2-H4K8ac_peak_25271 | 8.85813  |                                                      |
| 6 | 109777092 | 1.1E+08  | KD2-H4K8ac_peak_25272 | 10.17486 |                                                      |
| 6 | 109803939 | 1.1E+08  | KD2-H4K8ac_peak_25273 | 15.71138 | ZBTB24_ENSG00000112365                               |
| 6 | 110011502 | 1.1E+08  | KD2-H4K8ac_peak_25274 | 5.45396  | AK9_ENSG00000155085;FIG4_ENSG00000112367             |
| 6 | 110012550 | 1.1E+08  | KD2-H4K8ac_peak_25275 | 8.04448  | AK9_ENSG00000155085;FIG4_ENSG00000112367             |
| 6 | 110500316 | 1.11E+08 | KD2-H4K8ac_peak_25276 | 12.93209 | WASF1_ENSG00000112290;CDC40_ENSG00000168438          |
| 6 | 110650774 | 1.11E+08 | KD2-H4K8ac_peak_25277 | 6.4095   |                                                      |
| 6 | 110678744 | 1.11E+08 | KD2-H4K8ac_peak_25278 | 6.65673  | METTL24_ENSG00000053328                              |
| 6 | 111195209 | 1.11E+08 | KD2-H4K8ac_peak_25279 | 6.66692  | AMD1_ENSG00000123505                                 |
| 6 | 111196854 | 1.11E+08 | KD2-H4K8ac_peak_25280 | 7.44324  | AMD1_ENSG00000123505                                 |
| 6 | 111278800 | 1.11E+08 | KD2-H4K8ac_peak_25281 | 11.90267 | GTF3C6_ENSG00000155115                               |
| 6 | 111279546 | 1.11E+08 | KD2-H4K8ac_peak_25282 | 21.2844  | GTF3C6_ENSG00000155115                               |
| 6 | 111302766 | 1.11E+08 | KD2-H4K8ac_peak_25283 | 6.52179  | RPF2_ENSG00000197498                                 |
| 6 | 111409059 | 1.11E+08 | KD2-H4K8ac_peak_25284 | 5.61067  | SLC16A10_ENSG00000112394                             |
| 6 | 111804618 | 1.12E+08 | KD2-H4K8ac_peak_25285 | 9.57101  | REV3L_ENSG00000009413;TRAF3IP2-AS1_ENSG00000231889   |
| 6 | 111881171 | 1.12E+08 | KD2-H4K8ac_peak_25286 | 10.30951 |                                                      |
| 6 | 111887162 | 1.12E+08 | KD2-H4K8ac_peak_25287 | 8.30974  |                                                      |
| 6 | 111887851 | 1.12E+08 | KD2-H4K8ac_peak_25288 | 6.04107  |                                                      |
| 6 | 111889833 | 1.12E+08 | KD2-H4K8ac_peak_25289 | 6.89708  |                                                      |
| 6 | 111913044 | 1.12E+08 | KD2-H4K8ac_peak_25290 | 6.4095   |                                                      |
| 6 | 111946884 | 1.12E+08 | KD2-H4K8ac_peak_25291 | 6.31143  |                                                      |
| 6 | 112059666 | 1.12E+08 | KD2-H4K8ac_peak_25292 | 9.89126  |                                                      |
| 6 | 112061986 | 1.12E+08 | KD2-H4K8ac_peak_25293 | 6.47635  |                                                      |
| 6 | 112080683 | 1.12E+08 | KD2-H4K8ac_peak_25294 | 5.13615  |                                                      |
| 6 | 112114881 | 1.12E+08 | KD2-H4K8ac_peak_25295 | 7.76329  |                                                      |
| 6 | 112193815 | 1.12E+08 | KD2-H4K8ac_peak_25296 | 12.46522 | FYN_ENSG00000010810                                  |
| 6 | 112408363 | 1.12E+08 | KD2-H4K8ac_peak_25297 | 5.57044  | TUBE1_ENSG00000074935;FAM229B_ENSG00000203778        |
| 6 | 112464723 | 1.12E+08 | KD2-H4K8ac_peak_25298 | 5.43522  |                                                      |

|   |           |          |                       |          |                                                                        |
|---|-----------|----------|-----------------------|----------|------------------------------------------------------------------------|
| 6 | 112470748 | 1.12E+08 | KD2-H4K8ac_peak_25299 | 5.73839  |                                                                        |
| 6 | 112519737 | 1.13E+08 | KD2-H4K8ac_peak_25300 | 5.57044  |                                                                        |
| 6 | 112524172 | 1.13E+08 | KD2-H4K8ac_peak_25301 | 8.09472  |                                                                        |
| 6 | 113680857 | 1.14E+08 | KD2-H4K8ac_peak_25302 | 5.14125  |                                                                        |
| 6 | 113886198 | 1.14E+08 | KD2-H4K8ac_peak_25303 | 8.1233   |                                                                        |
| 6 | 114053724 | 1.14E+08 | KD2-H4K8ac_peak_25304 | 6.16888  |                                                                        |
| 6 | 114175883 | 1.14E+08 | KD2-H4K8ac_peak_25305 | 7.27716  |                                                                        |
| 6 | 114176572 | 1.14E+08 | KD2-H4K8ac_peak_25306 | 8.37043  |                                                                        |
| 6 | 114177589 | 1.14E+08 | KD2-H4K8ac_peak_25307 | 7.18916  | MARCKS_ENSG00000155130                                                 |
| 6 | 114178909 | 1.14E+08 | KD2-H4K8ac_peak_25308 | 9.11031  | MARCKS_ENSG00000155130                                                 |
| 6 | 114291280 | 1.14E+08 | KD2-H4K8ac_peak_25309 | 14.15075 | RP3-399L15.3_ENSG00000228624                                           |
| 6 | 114662860 | 1.15E+08 | KD2-H4K8ac_peak_25310 | 10.21502 |                                                                        |
| 6 | 114664502 | 1.15E+08 | KD2-H4K8ac_peak_25311 | 4.44527  | HS3ST5_ENSG00000249853                                                 |
| 6 | 115859979 | 1.16E+08 | KD2-H4K8ac_peak_25312 | 5.14125  |                                                                        |
| 6 | 116421627 | 1.16E+08 | KD2-H4K8ac_peak_25313 | 11.02863 | NT5DC1_ENSG00000178425                                                 |
| 6 | 116574925 | 1.17E+08 | KD2-H4K8ac_peak_25314 | 6.25869  | TSPYL4_ENSG00000187189;DSE_ENSG00000111817;RP3-486I3.7_ENSG00000237021 |
| 6 | 116600580 | 1.17E+08 | KD2-H4K8ac_peak_25315 | 6.40683  | TSPYL1_ENSG00000189241;RP1-93H18.1_ENSG00000240050                     |
| 6 | 116691884 | 1.17E+08 | KD2-H4K8ac_peak_25316 | 3.75035  |                                                                        |
| 6 | 116989579 | 1.17E+08 | KD2-H4K8ac_peak_25317 | 3.75035  | ZUFSP_ENSG00000153975                                                  |
| 6 | 117001556 | 1.17E+08 | KD2-H4K8ac_peak_25318 | 10.02417 | KPNA5_ENSG00000196911                                                  |
| 6 | 117002421 | 1.17E+08 | KD2-H4K8ac_peak_25319 | 6.99815  | KPNA5_ENSG00000196911                                                  |
| 6 | 117085822 | 1.17E+08 | KD2-H4K8ac_peak_25320 | 7.27716  | FAM162B_ENSG00000183807                                                |
| 6 | 117869142 | 1.18E+08 | KD2-H4K8ac_peak_25321 | 11.09936 |                                                                        |
| 6 | 117923377 | 1.18E+08 | KD2-H4K8ac_peak_25322 | 10.63441 | GOPC_ENSG00000047932                                                   |
| 6 | 117923817 | 1.18E+08 | KD2-H4K8ac_peak_25323 | 5.9696   | GOPC_ENSG00000047932                                                   |
| 6 | 118971794 | 1.19E+08 | KD2-H4K8ac_peak_25324 | 3.97079  |                                                                        |
| 6 | 118972994 | 1.19E+08 | KD2-H4K8ac_peak_25325 | 8.37043  |                                                                        |
| 6 | 119215973 | 1.19E+08 | KD2-H4K8ac_peak_25326 | 6.67092  | ASF1A_ENSG00000111875                                                  |
| 6 | 119255774 | 1.19E+08 | KD2-H4K8ac_peak_25327 | 8.79106  | MCM9_ENSG00000111877;RP11-351A11.1_ENSG00000253194                     |
| 6 | 119399450 | 1.19E+08 | KD2-H4K8ac_peak_25328 | 5.01002  |                                                                        |
| 6 | 119400035 | 1.19E+08 | KD2-H4K8ac_peak_25329 | 3.90092  |                                                                        |
| 6 | 119516532 | 1.2E+08  | KD2-H4K8ac_peak_25330 | 8.37231  |                                                                        |
| 6 | 121654987 | 1.22E+08 | KD2-H4K8ac_peak_25331 | 10.21502 | TBC1D32_ENSG00000146350                                                |
| 6 | 121655731 | 1.22E+08 | KD2-H4K8ac_peak_25332 | 7.47462  | TBC1D32_ENSG00000146350                                                |
| 6 | 122720267 | 1.23E+08 | KD2-H4K8ac_peak_25333 | 6.40683  | HSF2_ENSG00000025156                                                   |
| 6 | 122720915 | 1.23E+08 | KD2-H4K8ac_peak_25334 | 6.65673  | HSF2_ENSG00000025156                                                   |
| 6 | 123316972 | 1.23E+08 | KD2-H4K8ac_peak_25335 | 9.08816  | CLVS2_ENSG00000146352                                                  |
| 6 | 125622787 | 1.26E+08 | KD2-H4K8ac_peak_25336 | 12.06346 | HDDC2_ENSG00000111906                                                  |
| 6 | 126102028 | 1.26E+08 | KD2-H4K8ac_peak_25337 | 7.12754  | NCOA7_ENSG00000111912                                                  |
| 6 | 126111045 | 1.26E+08 | KD2-H4K8ac_peak_25338 | 11.05467 |                                                                        |
| 6 | 126277976 | 1.26E+08 | KD2-H4K8ac_peak_25339 | 9.34195  | HINT3_ENSG00000111911                                                  |
| 6 | 126306796 | 1.26E+08 | KD2-H4K8ac_peak_25340 | 7.40314  | TRMT11_ENSG00000066651                                                 |
| 6 | 127588100 | 1.28E+08 | KD2-H4K8ac_peak_25341 | 10.17486 | RNF146_ENSG00000118518                                                 |
| 6 | 127664207 | 1.28E+08 | KD2-H4K8ac_peak_25342 | 6.40683  | ECHDC1_ENSG00000093144                                                 |
| 6 | 127664680 | 1.28E+08 | KD2-H4K8ac_peak_25343 | 7.45501  | ECHDC1_ENSG00000093144                                                 |
| 6 | 127839741 | 1.28E+08 | KD2-H4K8ac_peak_25344 | 11.30637 | SOGA3_ENSG00000214338;SOGA3_ENSG00000255330;C6orf58_ENSG00000184530    |

|   |           |          |                       |          |                                                   |
|---|-----------|----------|-----------------------|----------|---------------------------------------------------|
| 6 | 133134696 | 1.33E+08 | KD2-H4K8ac_peak_25345 | 11.22681 | RPS12_ENSG00000112306                             |
| 6 | 133135856 | 1.33E+08 | KD2-H4K8ac_peak_25346 | 5.14125  | RPS12_ENSG00000112306;SNORD101_ENSG00000206754    |
| 6 | 133432202 | 1.33E+08 | KD2-H4K8ac_peak_25347 | 8.1233   |                                                   |
| 6 | 133452702 | 1.33E+08 | KD2-H4K8ac_peak_25348 | 6.07178  |                                                   |
| 6 | 134242012 | 1.34E+08 | KD2-H4K8ac_peak_25349 | 3.87414  |                                                   |
| 6 | 134273229 | 1.34E+08 | KD2-H4K8ac_peak_25350 | 17.10757 | TBPL1_ENSG00000028839                             |
| 6 | 134496276 | 1.34E+08 | KD2-H4K8ac_peak_25351 | 5.30799  |                                                   |
| 6 | 135043930 | 1.35E+08 | KD2-H4K8ac_peak_25352 | 5.93446  |                                                   |
| 6 | 135376310 | 1.35E+08 | KD2-H4K8ac_peak_25353 | 7.59794  | CTA-212D2.2_ENSG00000232876                       |
| 6 | 135501986 | 1.36E+08 | KD2-H4K8ac_peak_25354 | 12.93209 | MYB_ENSG00000118513                               |
| 6 | 135818601 | 1.36E+08 | KD2-H4K8ac_peak_25355 | 8.23274  | AHI1_ENSG00000135541;LINC00271_ENSG00000231028    |
| 6 | 135819601 | 1.36E+08 | KD2-H4K8ac_peak_25356 | 3.75035  | AHI1_ENSG00000135541                              |
| 6 | 136358625 | 1.36E+08 | KD2-H4K8ac_peak_25357 | 10.29344 |                                                   |
| 6 | 136359186 | 1.36E+08 | KD2-H4K8ac_peak_25358 | 3.75035  |                                                   |
| 6 | 136433211 | 1.36E+08 | KD2-H4K8ac_peak_25359 | 9.4551   |                                                   |
| 6 | 136435732 | 1.36E+08 | KD2-H4K8ac_peak_25360 | 5.45396  |                                                   |
| 6 | 136611610 | 1.37E+08 | KD2-H4K8ac_peak_25361 | 4.54006  | BCLAF1_ENSG00000029363                            |
| 6 | 136814373 | 1.37E+08 | KD2-H4K8ac_peak_25362 | 7.27716  |                                                   |
| 6 | 136870963 | 1.37E+08 | KD2-H4K8ac_peak_25363 | 9.20193  | MAP7_ENSG00000135525;RP3-325F22.5_ENSG00000272189 |
| 6 | 137112996 | 1.37E+08 | KD2-H4K8ac_peak_25364 | 7.44324  | MAP3K5_ENSG00000197442                            |
| 6 | 137113792 | 1.37E+08 | KD2-H4K8ac_peak_25365 | 7.07117  | MAP3K5_ENSG00000197442                            |
| 6 | 137143257 | 1.37E+08 | KD2-H4K8ac_peak_25366 | 4.8888   | PEX7_ENSG00000112357                              |
| 6 | 137143772 | 1.37E+08 | KD2-H4K8ac_peak_25367 | 12.14909 | PEX7_ENSG00000112357                              |
| 6 | 137242637 | 1.37E+08 | KD2-H4K8ac_peak_25368 | 13.59098 | SLC35D3_ENSG00000182747                           |
| 6 | 137278489 | 1.37E+08 | KD2-H4K8ac_peak_25369 | 10.02431 |                                                   |
| 6 | 137280234 | 1.37E+08 | KD2-H4K8ac_peak_25370 | 10.25088 |                                                   |
| 6 | 137283507 | 1.37E+08 | KD2-H4K8ac_peak_25371 | 4.86324  |                                                   |
| 6 | 137288560 | 1.37E+08 | KD2-H4K8ac_peak_25372 | 10.7186  |                                                   |
| 6 | 137291037 | 1.37E+08 | KD2-H4K8ac_peak_25373 | 4.37815  |                                                   |
| 6 | 137291904 | 1.37E+08 | KD2-H4K8ac_peak_25374 | 13.81781 |                                                   |
| 6 | 137293242 | 1.37E+08 | KD2-H4K8ac_peak_25375 | 5.5051   |                                                   |
| 6 | 137294751 | 1.37E+08 | KD2-H4K8ac_peak_25376 | 9.08816  | RPL35AP3_ENSG00000230350                          |
| 6 | 137296511 | 1.37E+08 | KD2-H4K8ac_peak_25377 | 4.42765  |                                                   |
| 6 | 137298394 | 1.37E+08 | KD2-H4K8ac_peak_25378 | 7.55771  |                                                   |
| 6 | 137299609 | 1.37E+08 | KD2-H4K8ac_peak_25379 | 8.33001  |                                                   |
| 6 | 137300461 | 1.37E+08 | KD2-H4K8ac_peak_25380 | 18.62998 |                                                   |
| 6 | 137301565 | 1.37E+08 | KD2-H4K8ac_peak_25381 | 17.42214 |                                                   |
| 6 | 137302643 | 1.37E+08 | KD2-H4K8ac_peak_25382 | 21.11201 |                                                   |
| 6 | 137310496 | 1.37E+08 | KD2-H4K8ac_peak_25383 | 16.57619 |                                                   |
| 6 | 137365221 | 1.37E+08 | KD2-H4K8ac_peak_25384 | 14.98671 | IL20RA_ENSG00000016402                            |
| 6 | 137540123 | 1.38E+08 | KD2-H4K8ac_peak_25385 | 17.76996 | IFNGR1_ENSG00000027697                            |
| 6 | 138724435 | 1.39E+08 | KD2-H4K8ac_peak_25386 | 8.59579  | MARCKSL1P2_ENSG00000215878;HEBP2_ENSG00000051620  |
| 6 | 138725513 | 1.39E+08 | KD2-H4K8ac_peak_25387 | 13.56049 | MARCKSL1P2_ENSG00000215878;HEBP2_ENSG00000051620  |
| 6 | 139308424 | 1.39E+08 | KD2-H4K8ac_peak_25388 | 6.40297  | REPS1_ENSG00000135597                             |
| 6 | 139308890 | 1.39E+08 | KD2-H4K8ac_peak_25389 | 12.74171 | REPS1_ENSG00000135597                             |
| 6 | 139309771 | 1.39E+08 | KD2-H4K8ac_peak_25390 | 10.02431 | REPS1_ENSG00000135597                             |

|   |           |          |                       |          |                                                                      |
|---|-----------|----------|-----------------------|----------|----------------------------------------------------------------------|
| 6 | 139350081 | 1.39E+08 | KD2-H4K8ac_peak_25391 | 5.59859  | ABRACL_ENSG00000146386                                               |
| 6 | 142839579 | 1.43E+08 | KD2-H4K8ac_peak_25392 | 9.15069  |                                                                      |
| 6 | 142973011 | 1.43E+08 | KD2-H4K8ac_peak_25393 | 4.75764  |                                                                      |
| 6 | 143164567 | 1.43E+08 | KD2-H4K8ac_peak_25394 | 6.00226  |                                                                      |
| 6 | 143166723 | 1.43E+08 | KD2-H4K8ac_peak_25395 | 11.2938  |                                                                      |
| 6 | 143247588 | 1.43E+08 | KD2-H4K8ac_peak_25396 | 14.66631 |                                                                      |
| 6 | 143265622 | 1.43E+08 | KD2-H4K8ac_peak_25397 | 10.05606 | HIVEP2_ENSG00000010818                                               |
| 6 | 143268014 | 1.43E+08 | KD2-H4K8ac_peak_25398 | 12.14909 |                                                                      |
| 6 | 143382212 | 1.43E+08 | KD2-H4K8ac_peak_25399 | 12.25733 | AIG1_ENSG00000146416                                                 |
| 6 | 143771394 | 1.44E+08 | KD2-H4K8ac_peak_25400 | 14.15075 | ADAT2_ENSG00000189007;RNA5SP221_ENSG00000223203;PEX3_ENSG00000034693 |
| 6 | 143832406 | 1.44E+08 | KD2-H4K8ac_peak_25401 | 13.57066 | FUCA2_ENSG00000001036                                                |
| 6 | 143857740 | 1.44E+08 | KD2-H4K8ac_peak_25402 | 13.73635 | PHACTR2_ENSG00000112419                                              |
| 6 | 143999149 | 1.44E+08 | KD2-H4K8ac_peak_25403 | 6.83936  |                                                                      |
| 6 | 144163205 | 1.44E+08 | KD2-H4K8ac_peak_25404 | 6.60096  | LTV1_ENSG00000135521                                                 |
| 6 | 144163930 | 1.44E+08 | KD2-H4K8ac_peak_25405 | 10.43145 | LTV1_ENSG00000135521                                                 |
| 6 | 144164511 | 1.44E+08 | KD2-H4K8ac_peak_25406 | 10.0692  | LTV1_ENSG00000135521                                                 |
| 6 | 144329323 | 1.44E+08 | KD2-H4K8ac_peak_25407 | 7.01964  |                                                                      |
| 6 | 144416469 | 1.44E+08 | KD2-H4K8ac_peak_25408 | 4.54006  | SF3B5_ENSG00000169976                                                |
| 6 | 144417069 | 1.44E+08 | KD2-H4K8ac_peak_25409 | 12.42761 | SF3B5_ENSG00000169976                                                |
| 6 | 144537089 | 1.45E+08 | KD2-H4K8ac_peak_25410 | 14.00658 |                                                                      |
| 6 | 145243385 | 1.45E+08 | KD2-H4K8ac_peak_25411 | 4.211    |                                                                      |
| 6 | 145528156 | 1.46E+08 | KD2-H4K8ac_peak_25412 | 4.77079  |                                                                      |
| 6 | 146056062 | 1.46E+08 | KD2-H4K8ac_peak_25413 | 16.57619 | EPM2A_ENSG00000112425;RP3-466P17.1_ENSG00000270638                   |
| 6 | 146135450 | 1.46E+08 | KD2-H4K8ac_peak_25414 | 9.95119  | FBXO30_ENSG00000118496;RP11-545I5.3_ENSG00000235652                  |
| 6 | 146136086 | 1.46E+08 | KD2-H4K8ac_peak_25415 | 7.27716  | FBXO30_ENSG00000118496;RP11-545I5.3_ENSG00000235652                  |
| 6 | 146285795 | 1.46E+08 | KD2-H4K8ac_peak_25416 | 8.30974  | SHPRH_ENSG00000146414                                                |
| 6 | 146755511 | 1.47E+08 | KD2-H4K8ac_peak_25417 | 8.94469  |                                                                      |
| 6 | 146864426 | 1.47E+08 | KD2-H4K8ac_peak_25418 | 14.275   | RAB32_ENSG00000118508                                                |
| 6 | 146864974 | 1.47E+08 | KD2-H4K8ac_peak_25419 | 5.54647  | RAB32_ENSG00000118508                                                |
| 6 | 147522943 | 1.48E+08 | KD2-H4K8ac_peak_25420 | 8.1233   |                                                                      |
| 6 | 147524829 | 1.48E+08 | KD2-H4K8ac_peak_25421 | 5.14125  | STXBP5-AS1_ENSG00000233452;STXBP5_ENSG00000164506                    |
| 6 | 147525359 | 1.48E+08 | KD2-H4K8ac_peak_25422 | 7.47462  | STXBP5-AS1_ENSG00000233452;STXBP5_ENSG00000164506                    |
| 6 | 149638087 | 1.5E+08  | KD2-H4K8ac_peak_25423 | 12.30509 |                                                                      |
| 6 | 149638825 | 1.5E+08  | KD2-H4K8ac_peak_25424 | 10.08707 |                                                                      |
| 6 | 149771746 | 1.5E+08  | KD2-H4K8ac_peak_25425 | 11.00004 |                                                                      |
| 6 | 149867317 | 1.5E+08  | KD2-H4K8ac_peak_25426 | 11.43863 | PPIL4_ENSG00000131013                                                |
| 6 | 149868176 | 1.5E+08  | KD2-H4K8ac_peak_25427 | 10.21502 |                                                                      |
| 6 | 149969472 | 1.5E+08  | KD2-H4K8ac_peak_25428 | 12.06346 | KATNA1_ENSG00000186625                                               |
| 6 | 150038757 | 1.5E+08  | KD2-H4K8ac_peak_25429 | 18.25771 | LATS1_ENSG00000131023                                                |
| 6 | 150067553 | 1.5E+08  | KD2-H4K8ac_peak_25430 | 5.23853  |                                                                      |
| 6 | 150068252 | 1.5E+08  | KD2-H4K8ac_peak_25431 | 4.42765  |                                                                      |
| 6 | 150070539 | 1.5E+08  | KD2-H4K8ac_peak_25432 | 7.47462  | NUP43_ENSG00000120253;PCMT1_ENSG00000120265                          |
| 6 | 150070952 | 1.5E+08  | KD2-H4K8ac_peak_25433 | 11.05467 | NUP43_ENSG00000120253;PCMT1_ENSG00000120265                          |
| 6 | 150184685 | 1.5E+08  | KD2-H4K8ac_peak_25434 | 7.74292  | RP11-244K5.8_ENSG00000268592                                         |
| 6 | 150246965 | 1.5E+08  | KD2-H4K8ac_peak_25435 | 5.82799  |                                                                      |
| 6 | 151186870 | 1.51E+08 | KD2-H4K8ac_peak_25436 | 15.69572 | MTHFD1L_ENSG00000120254                                              |

|   |           |          |                       |          |                                                    |
|---|-----------|----------|-----------------------|----------|----------------------------------------------------|
| 6 | 151187662 | 1.51E+08 | KD2-H4K8ac_peak_25437 | 11.89502 | MTHFD1L_ENSG00000120254                            |
| 6 | 151365888 | 1.51E+08 | KD2-H4K8ac_peak_25438 | 9.08816  |                                                    |
| 6 | 151378553 | 1.51E+08 | KD2-H4K8ac_peak_25439 | 11.43863 |                                                    |
| 6 | 151433639 | 1.51E+08 | KD2-H4K8ac_peak_25440 | 12.80176 |                                                    |
| 6 | 151561178 | 1.52E+08 | KD2-H4K8ac_peak_25441 | 4.37809  | AKAP12_ENSG00000131016                             |
| 6 | 151609369 | 1.52E+08 | KD2-H4K8ac_peak_25442 | 5.49367  |                                                    |
| 6 | 151646142 | 1.52E+08 | KD2-H4K8ac_peak_25443 | 6.37652  |                                                    |
| 6 | 151710423 | 1.52E+08 | KD2-H4K8ac_peak_25444 | 14.66631 |                                                    |
| 6 | 151711921 | 1.52E+08 | KD2-H4K8ac_peak_25445 | 11.60333 | ZBTB2_ENSG00000181472                              |
| 6 | 151772677 | 1.52E+08 | KD2-H4K8ac_peak_25446 | 4.77079  | RMND1_ENSG00000155906;C6orf211_ENSG00000146476     |
| 6 | 151773681 | 1.52E+08 | KD2-H4K8ac_peak_25447 | 12.84642 | RMND1_ENSG00000155906;C6orf211_ENSG00000146476     |
| 6 | 152420989 | 1.52E+08 | KD2-H4K8ac_peak_25448 | 4.42765  |                                                    |
| 6 | 152431788 | 1.52E+08 | KD2-H4K8ac_peak_25449 | 6.2781   |                                                    |
| 6 | 152622841 | 1.53E+08 | KD2-H4K8ac_peak_25450 | 4.20044  |                                                    |
| 6 | 153137820 | 1.53E+08 | KD2-H4K8ac_peak_25451 | 6.16888  |                                                    |
| 6 | 153303345 | 1.53E+08 | KD2-H4K8ac_peak_25452 | 7.07117  |                                                    |
| 6 | 153303903 | 1.53E+08 | KD2-H4K8ac_peak_25453 | 11.05467 | FBXO5_ENSG00000112029;RP1-101K10.6_ENSG00000227627 |
| 6 | 153304456 | 1.53E+08 | KD2-H4K8ac_peak_25454 | 14.83804 | FBXO5_ENSG00000112029;RP1-101K10.6_ENSG00000227627 |
| 6 | 153324215 | 1.53E+08 | KD2-H4K8ac_peak_25455 | 4.01115  | MTRF1L_ENSG00000112031                             |
| 6 | 153452664 | 1.53E+08 | KD2-H4K8ac_peak_25456 | 9.63776  | RGS17_ENSG00000091844                              |
| 6 | 153471416 | 1.53E+08 | KD2-H4K8ac_peak_25457 | 6.30229  |                                                    |
| 6 | 154360330 | 1.54E+08 | KD2-H4K8ac_peak_25458 | 7.1181   |                                                    |
| 6 | 154414182 | 1.54E+08 | KD2-H4K8ac_peak_25459 | 14.15075 |                                                    |
| 6 | 154416171 | 1.54E+08 | KD2-H4K8ac_peak_25460 | 5.30799  |                                                    |
| 6 | 154417289 | 1.54E+08 | KD2-H4K8ac_peak_25461 | 7.79898  |                                                    |
| 6 | 154765622 | 1.55E+08 | KD2-H4K8ac_peak_25462 | 4.59928  |                                                    |
| 6 | 154767732 | 1.55E+08 | KD2-H4K8ac_peak_25463 | 8.70735  |                                                    |
| 6 | 154770488 | 1.55E+08 | KD2-H4K8ac_peak_25464 | 6.9809   |                                                    |
| 6 | 154775546 | 1.55E+08 | KD2-H4K8ac_peak_25465 | 6.40683  |                                                    |
| 6 | 154776165 | 1.55E+08 | KD2-H4K8ac_peak_25466 | 5.14125  |                                                    |
| 6 | 154780360 | 1.55E+08 | KD2-H4K8ac_peak_25467 | 3.75035  |                                                    |
| 6 | 154780975 | 1.55E+08 | KD2-H4K8ac_peak_25468 | 7.27716  |                                                    |
| 6 | 154781811 | 1.55E+08 | KD2-H4K8ac_peak_25469 | 5.14125  |                                                    |
| 6 | 154783636 | 1.55E+08 | KD2-H4K8ac_peak_25470 | 11.05467 |                                                    |
| 6 | 154784488 | 1.55E+08 | KD2-H4K8ac_peak_25471 | 10.72656 |                                                    |
| 6 | 154891814 | 1.55E+08 | KD2-H4K8ac_peak_25472 | 5.14125  |                                                    |
| 6 | 154936834 | 1.55E+08 | KD2-H4K8ac_peak_25473 | 6.16888  |                                                    |
| 6 | 155053349 | 1.55E+08 | KD2-H4K8ac_peak_25474 | 6.8836   | SCAF8_ENSG00000213079                              |
| 6 | 155053774 | 1.55E+08 | KD2-H4K8ac_peak_25475 | 19.63735 | SCAF8_ENSG00000213079                              |
| 6 | 155169361 | 1.55E+08 | KD2-H4K8ac_peak_25476 | 7.59643  |                                                    |
| 6 | 155276701 | 1.55E+08 | KD2-H4K8ac_peak_25477 | 5.57044  |                                                    |
| 6 | 155316134 | 1.55E+08 | KD2-H4K8ac_peak_25478 | 7.69287  |                                                    |
| 6 | 155316773 | 1.55E+08 | KD2-H4K8ac_peak_25479 | 6.35843  |                                                    |
| 6 | 155361737 | 1.55E+08 | KD2-H4K8ac_peak_25480 | 11.05407 |                                                    |
| 6 | 155476388 | 1.55E+08 | KD2-H4K8ac_peak_25481 | 6.0073   |                                                    |
| 6 | 155579300 | 1.56E+08 | KD2-H4K8ac_peak_25482 | 7.91974  |                                                    |

|   |           |          |                       |          |                                                                                                          |
|---|-----------|----------|-----------------------|----------|----------------------------------------------------------------------------------------------------------|
| 6 | 155596150 | 1.56E+08 | KD2-H4K8ac_peak_25483 | 9.07071  |                                                                                                          |
| 6 | 155635046 | 1.56E+08 | KD2-H4K8ac_peak_25484 | 3.87414  | TFB1M_ENSG00000029639                                                                                    |
| 6 | 155725662 | 1.56E+08 | KD2-H4K8ac_peak_25485 | 5.43522  |                                                                                                          |
| 6 | 155763169 | 1.56E+08 | KD2-H4K8ac_peak_25486 | 6.66692  |                                                                                                          |
| 6 | 155768241 | 1.56E+08 | KD2-H4K8ac_peak_25487 | 8.1718   |                                                                                                          |
| 6 | 155771151 | 1.56E+08 | KD2-H4K8ac_peak_25488 | 8.30974  |                                                                                                          |
| 6 | 155850880 | 1.56E+08 | KD2-H4K8ac_peak_25489 | 9.15329  |                                                                                                          |
| 6 | 156348372 | 1.56E+08 | KD2-H4K8ac_peak_25490 | 9.11031  |                                                                                                          |
| 6 | 156349758 | 1.56E+08 | KD2-H4K8ac_peak_25491 | 4.67342  |                                                                                                          |
| 6 | 156350805 | 1.56E+08 | KD2-H4K8ac_peak_25492 | 10.21502 |                                                                                                          |
| 6 | 156583941 | 1.57E+08 | KD2-H4K8ac_peak_25493 | 7.59643  |                                                                                                          |
| 6 | 156600275 | 1.57E+08 | KD2-H4K8ac_peak_25494 | 7.79898  |                                                                                                          |
| 6 | 157008703 | 1.57E+08 | KD2-H4K8ac_peak_25495 | 10.96455 |                                                                                                          |
| 6 | 157098383 | 1.57E+08 | KD2-H4K8ac_peak_25496 | 4.44527  | RP11-230C9.2_ENSG00000271551;ARID1B_ENSG00000049618                                                      |
| 6 | 157099013 | 1.57E+08 | KD2-H4K8ac_peak_25497 | 15.58442 | RP11-230C9.2_ENSG00000271551;ARID1B_ENSG00000049618;MIR4466_ENSG00000271899;RP11-230C9.3_ENSG00000270487 |
| 6 | 157297768 | 1.57E+08 | KD2-H4K8ac_peak_25498 | 6.64891  | RP11-2J18.1_ENSG00000218596                                                                              |
| 6 | 157342256 | 1.57E+08 | KD2-H4K8ac_peak_25499 | 16.8435  |                                                                                                          |
| 6 | 157633071 | 1.58E+08 | KD2-H4K8ac_peak_25500 | 5.57044  |                                                                                                          |
| 6 | 157695239 | 1.58E+08 | KD2-H4K8ac_peak_25501 | 11.22681 |                                                                                                          |
| 6 | 157696385 | 1.58E+08 | KD2-H4K8ac_peak_25502 | 4.52039  |                                                                                                          |
| 6 | 157744145 | 1.58E+08 | KD2-H4K8ac_peak_25503 | 3.86308  | TMEM242_ENSG00000215712;RP5-933K21.3_ENSG00000271040                                                     |
| 6 | 157744685 | 1.58E+08 | KD2-H4K8ac_peak_25504 | 7.44324  | TMEM242_ENSG00000215712;RP5-933K21.3_ENSG00000271040                                                     |
| 6 | 157800735 | 1.58E+08 | KD2-H4K8ac_peak_25505 | 9.23578  |                                                                                                          |
| 6 | 157801215 | 1.58E+08 | KD2-H4K8ac_peak_25506 | 17.42905 | ZDHHC14_ENSG00000175048                                                                                  |
| 6 | 158139898 | 1.58E+08 | KD2-H4K8ac_peak_25507 | 6.66692  |                                                                                                          |
| 6 | 158243731 | 1.58E+08 | KD2-H4K8ac_peak_25508 | 17.43561 | SNX9_ENSG00000130340                                                                                     |
| 6 | 158402639 | 1.58E+08 | KD2-H4K8ac_peak_25509 | 5.01002  | SYNJ2_ENSG00000078269                                                                                    |
| 6 | 158420467 | 1.58E+08 | KD2-H4K8ac_peak_25510 | 5.63633  |                                                                                                          |
| 6 | 158447107 | 1.58E+08 | KD2-H4K8ac_peak_25511 | 7.27716  |                                                                                                          |
| 6 | 158589364 | 1.59E+08 | KD2-H4K8ac_peak_25512 | 30.32389 | SERAC1_ENSG00000122335;GTF2H5_ENSG00000272047                                                            |
| 6 | 158652775 | 1.59E+08 | KD2-H4K8ac_peak_25513 | 12.08081 |                                                                                                          |
| 6 | 158653266 | 1.59E+08 | KD2-H4K8ac_peak_25514 | 14.69247 |                                                                                                          |
| 6 | 158862121 | 1.59E+08 | KD2-H4K8ac_peak_25515 | 7.13615  |                                                                                                          |
| 6 | 158863301 | 1.59E+08 | KD2-H4K8ac_peak_25516 | 7.52168  |                                                                                                          |
| 6 | 158958325 | 1.59E+08 | KD2-H4K8ac_peak_25517 | 6.83936  | TMEM181_ENSG00000146433                                                                                  |
| 6 | 158980590 | 1.59E+08 | KD2-H4K8ac_peak_25518 | 17.70837 |                                                                                                          |
| 6 | 159065153 | 1.59E+08 | KD2-H4K8ac_peak_25519 | 7.07117  | DYNLT1_ENSG00000146425                                                                                   |
| 6 | 159075446 | 1.59E+08 | KD2-H4K8ac_peak_25520 | 6.66692  |                                                                                                          |
| 6 | 159172232 | 1.59E+08 | KD2-H4K8ac_peak_25521 | 7.22936  |                                                                                                          |
| 6 | 159172862 | 1.59E+08 | KD2-H4K8ac_peak_25522 | 5.32933  |                                                                                                          |
| 6 | 159174320 | 1.59E+08 | KD2-H4K8ac_peak_25523 | 4.57699  |                                                                                                          |
| 6 | 159176457 | 1.59E+08 | KD2-H4K8ac_peak_25524 | 4.44527  |                                                                                                          |
| 6 | 159178592 | 1.59E+08 | KD2-H4K8ac_peak_25525 | 7.36799  |                                                                                                          |
| 6 | 159179791 | 1.59E+08 | KD2-H4K8ac_peak_25526 | 8.04448  |                                                                                                          |
| 6 | 159240546 | 1.59E+08 | KD2-H4K8ac_peak_25527 | 10.05606 | EZR_ENSG00000092820                                                                                      |
| 6 | 159290433 | 1.59E+08 | KD2-H4K8ac_peak_25528 | 8.55271  | C6orf99_ENSG00000203711                                                                                  |

|   |           |          |                       |          |                                                     |
|---|-----------|----------|-----------------------|----------|-----------------------------------------------------|
| 6 | 159290959 | 1.59E+08 | KD2-H4K8ac_peak_25529 | 11.05467 | C6orf99_ENSG00000203711                             |
| 6 | 159420432 | 1.59E+08 | KD2-H4K8ac_peak_25530 | 7.38799  | RSPH3_ENSG00000130363                               |
| 6 | 159421006 | 1.59E+08 | KD2-H4K8ac_peak_25531 | 18.54875 | RSPH3_ENSG00000130363                               |
| 6 | 159524802 | 1.6E+08  | KD2-H4K8ac_peak_25532 | 4.211    |                                                     |
| 6 | 160114587 | 1.6E+08  | KD2-H4K8ac_peak_25533 | 7.47462  |                                                     |
| 6 | 160148581 | 1.6E+08  | KD2-H4K8ac_peak_25534 | 14.8083  |                                                     |
| 6 | 160182508 | 1.6E+08  | KD2-H4K8ac_peak_25535 | 8.04448  | SOD2_ENSG00000112096                                |
| 6 | 160210164 | 1.6E+08  | KD2-H4K8ac_peak_25536 | 9.90914  | TCP1_ENSG00000120438;MRPL18_ENSG00000112110         |
| 6 | 160210981 | 1.6E+08  | KD2-H4K8ac_peak_25537 | 10.0692  | TCP1_ENSG00000120438;MRPL18_ENSG00000112110         |
| 6 | 160211578 | 1.6E+08  | KD2-H4K8ac_peak_25538 | 5.86783  | TCP1_ENSG00000120438;MRPL18_ENSG00000112110         |
| 6 | 160389547 | 1.6E+08  | KD2-H4K8ac_peak_25539 | 16.8435  | IGF2R_ENSG00000197081                               |
| 6 | 160390253 | 1.6E+08  | KD2-H4K8ac_peak_25540 | 7.59643  | IGF2R_ENSG00000197081                               |
| 6 | 161188081 | 1.61E+08 | KD2-H4K8ac_peak_25541 | 7.45501  |                                                     |
| 6 | 161412413 | 1.61E+08 | KD2-H4K8ac_peak_25542 | 7.07117  | RP3-428L16.2_ENSG00000272841;MAP3K4_ENSG00000085511 |
| 6 | 161695281 | 1.62E+08 | KD2-H4K8ac_peak_25543 | 7.47462  | AGPAT4_ENSG00000026652                              |
| 6 | 161834523 | 1.62E+08 | KD2-H4K8ac_peak_25544 | 9.4551   |                                                     |
| 6 | 162043440 | 1.62E+08 | KD2-H4K8ac_peak_25545 | 7.27716  |                                                     |
| 6 | 162047349 | 1.62E+08 | KD2-H4K8ac_peak_25546 | 4.211    |                                                     |
| 6 | 162257095 | 1.62E+08 | KD2-H4K8ac_peak_25547 | 5.20908  |                                                     |
| 6 | 162259695 | 1.62E+08 | KD2-H4K8ac_peak_25548 | 6.56926  |                                                     |
| 6 | 162344747 | 1.62E+08 | KD2-H4K8ac_peak_25549 | 7.12754  |                                                     |
| 6 | 162934259 | 1.63E+08 | KD2-H4K8ac_peak_25550 | 8.37231  |                                                     |
| 6 | 162954408 | 1.63E+08 | KD2-H4K8ac_peak_25551 | 6.25869  |                                                     |
| 6 | 162955754 | 1.63E+08 | KD2-H4K8ac_peak_25552 | 8.75125  |                                                     |
| 6 | 162959105 | 1.63E+08 | KD2-H4K8ac_peak_25553 | 7.27716  |                                                     |
| 6 | 162960995 | 1.63E+08 | KD2-H4K8ac_peak_25554 | 6.66692  |                                                     |
| 6 | 163014555 | 1.63E+08 | KD2-H4K8ac_peak_25555 | 7.59643  |                                                     |
| 6 | 163134299 | 1.63E+08 | KD2-H4K8ac_peak_25556 | 9.11031  |                                                     |
| 6 | 163135963 | 1.63E+08 | KD2-H4K8ac_peak_25557 | 6.0073   |                                                     |
| 6 | 163148325 | 1.63E+08 | KD2-H4K8ac_peak_25558 | 13.15254 | PARK2_ENSG00000185345;PACRG_ENSG00000112530         |
| 6 | 163149319 | 1.63E+08 | KD2-H4K8ac_peak_25559 | 7.12754  | PARK2_ENSG00000185345                               |
| 6 | 163586305 | 1.64E+08 | KD2-H4K8ac_peak_25560 | 8.55271  |                                                     |
| 6 | 163766991 | 1.64E+08 | KD2-H4K8ac_peak_25561 | 5.23853  |                                                     |
| 6 | 163834549 | 1.64E+08 | KD2-H4K8ac_peak_25562 | 13.12288 | CAHM_ENSG00000270419;QKI_ENSG00000112531            |
| 6 | 163835723 | 1.64E+08 | KD2-H4K8ac_peak_25563 | 6.40683  | CAHM_ENSG00000270419;QKI_ENSG00000112531            |
| 6 | 163836337 | 1.64E+08 | KD2-H4K8ac_peak_25564 | 5.20908  |                                                     |
| 6 | 163945621 | 1.64E+08 | KD2-H4K8ac_peak_25565 | 5.25071  |                                                     |
| 6 | 164133337 | 1.64E+08 | KD2-H4K8ac_peak_25566 | 4.77079  |                                                     |
| 6 | 164228336 | 1.64E+08 | KD2-H4K8ac_peak_25567 | 8.94469  |                                                     |
| 6 | 166062304 | 1.66E+08 | KD2-H4K8ac_peak_25568 | 8.12706  |                                                     |
| 6 | 166066562 | 1.66E+08 | KD2-H4K8ac_peak_25569 | 6.06203  |                                                     |
| 6 | 166073655 | 1.66E+08 | KD2-H4K8ac_peak_25570 | 14.39182 |                                                     |
| 6 | 166075360 | 1.66E+08 | KD2-H4K8ac_peak_25571 | 6.30229  |                                                     |
| 6 | 166314911 | 1.66E+08 | KD2-H4K8ac_peak_25572 | 6.90231  |                                                     |
| 6 | 166401159 | 1.66E+08 | KD2-H4K8ac_peak_25573 | 7.44324  | LINC00473_ENSG00000223414                           |
| 6 | 166402056 | 1.66E+08 | KD2-H4K8ac_peak_25574 | 10.18408 | LINC00473_ENSG00000223414                           |



|   |           |          |                       |          |                                                       |
|---|-----------|----------|-----------------------|----------|-------------------------------------------------------|
| 6 | 166418176 | 1.66E+08 | KD2-H4K8ac_peak_25575 | 6.89708  |                                                       |
| 6 | 166418746 | 1.66E+08 | KD2-H4K8ac_peak_25576 | 10.66719 |                                                       |
| 6 | 166420399 | 1.66E+08 | KD2-H4K8ac_peak_25577 | 6.61611  |                                                       |
| 6 | 166421901 | 1.66E+08 | KD2-H4K8ac_peak_25578 | 4.20044  |                                                       |
| 6 | 166666657 | 1.67E+08 | KD2-H4K8ac_peak_25579 | 8.17902  |                                                       |
| 6 | 166720265 | 1.67E+08 | KD2-H4K8ac_peak_25580 | 10.21366 | PRR18_ENSG00000176381                                 |
| 6 | 166755661 | 1.67E+08 | KD2-H4K8ac_peak_25581 | 13.95627 | SFT2D1_ENSG00000198818                                |
| 6 | 166796965 | 1.67E+08 | KD2-H4K8ac_peak_25582 | 5.75452  | MPC1_ENSG00000060762;RP1-168L15.5_ENSG00000261420     |
| 6 | 166808549 | 1.67E+08 | KD2-H4K8ac_peak_25583 | 6.2159   |                                                       |
| 6 | 166814937 | 1.67E+08 | KD2-H4K8ac_peak_25584 | 4.57699  |                                                       |
| 6 | 166849210 | 1.67E+08 | KD2-H4K8ac_peak_25585 | 6.0073   |                                                       |
| 6 | 166850285 | 1.67E+08 | KD2-H4K8ac_peak_25586 | 5.54647  |                                                       |
| 6 | 166852624 | 1.67E+08 | KD2-H4K8ac_peak_25587 | 10.46264 |                                                       |
| 6 | 166853612 | 1.67E+08 | KD2-H4K8ac_peak_25588 | 7.69287  |                                                       |
| 6 | 166854862 | 1.67E+08 | KD2-H4K8ac_peak_25589 | 4.67342  |                                                       |
| 6 | 166873377 | 1.67E+08 | KD2-H4K8ac_peak_25590 | 18.41184 |                                                       |
| 6 | 166874464 | 1.67E+08 | KD2-H4K8ac_peak_25591 | 7.27716  |                                                       |
| 6 | 166875244 | 1.67E+08 | KD2-H4K8ac_peak_25592 | 5.59859  |                                                       |
| 6 | 166877551 | 1.67E+08 | KD2-H4K8ac_peak_25593 | 3.87414  |                                                       |
| 6 | 166881015 | 1.67E+08 | KD2-H4K8ac_peak_25594 | 8.90012  |                                                       |
| 6 | 166883443 | 1.67E+08 | KD2-H4K8ac_peak_25595 | 8.95692  |                                                       |
| 6 | 166884610 | 1.67E+08 | KD2-H4K8ac_peak_25596 | 9.36516  |                                                       |
| 6 | 166886049 | 1.67E+08 | KD2-H4K8ac_peak_25597 | 6.13909  |                                                       |
| 6 | 166890083 | 1.67E+08 | KD2-H4K8ac_peak_25598 | 8.52559  |                                                       |
| 6 | 166892421 | 1.67E+08 | KD2-H4K8ac_peak_25599 | 8.83582  |                                                       |
| 6 | 166902190 | 1.67E+08 | KD2-H4K8ac_peak_25600 | 5.32137  |                                                       |
| 6 | 166902842 | 1.67E+08 | KD2-H4K8ac_peak_25601 | 11.05407 |                                                       |
| 6 | 166904004 | 1.67E+08 | KD2-H4K8ac_peak_25602 | 8.59579  |                                                       |
| 6 | 166906355 | 1.67E+08 | KD2-H4K8ac_peak_25603 | 4.86324  |                                                       |
| 6 | 166907096 | 1.67E+08 | KD2-H4K8ac_peak_25604 | 5.14125  |                                                       |
| 6 | 166907495 | 1.67E+08 | KD2-H4K8ac_peak_25605 | 8.02571  |                                                       |
| 6 | 166909025 | 1.67E+08 | KD2-H4K8ac_peak_25606 | 4.42765  |                                                       |
| 6 | 167032937 | 1.67E+08 | KD2-H4K8ac_peak_25607 | 7.26089  |                                                       |
| 6 | 167066325 | 1.67E+08 | KD2-H4K8ac_peak_25608 | 8.30974  |                                                       |
| 6 | 167085242 | 1.67E+08 | KD2-H4K8ac_peak_25609 | 4.86324  |                                                       |
| 6 | 167086687 | 1.67E+08 | KD2-H4K8ac_peak_25610 | 5.1707   |                                                       |
| 6 | 167103396 | 1.67E+08 | KD2-H4K8ac_peak_25611 | 8.09472  |                                                       |
| 6 | 167171053 | 1.67E+08 | KD2-H4K8ac_peak_25612 | 9.5456   |                                                       |
| 6 | 167275718 | 1.67E+08 | KD2-H4K8ac_peak_25613 | 3.97079  |                                                       |
| 6 | 167276356 | 1.67E+08 | KD2-H4K8ac_peak_25614 | 6.40297  |                                                       |
| 6 | 167370467 | 1.67E+08 | KD2-H4K8ac_peak_25615 | 9.20193  | RP11-514O12.4_ENSG00000249141;RNASET2_ENSG00000026297 |
| 6 | 167441619 | 1.67E+08 | KD2-H4K8ac_peak_25616 | 12.81138 |                                                       |
| 6 | 167442874 | 1.67E+08 | KD2-H4K8ac_peak_25617 | 5.46431  |                                                       |
| 6 | 167444514 | 1.67E+08 | KD2-H4K8ac_peak_25618 | 11.09837 |                                                       |
| 6 | 167530257 | 1.68E+08 | KD2-H4K8ac_peak_25619 | 4.59928  |                                                       |
| 6 | 167648575 | 1.68E+08 | KD2-H4K8ac_peak_25620 | 5.13615  |                                                       |

|   |           |          |                       |          |                                                                                 |
|---|-----------|----------|-----------------------|----------|---------------------------------------------------------------------------------|
| 6 | 167651155 | 1.68E+08 | KD2-H4K8ac_peak_25621 | 6.40683  |                                                                                 |
| 6 | 167657730 | 1.68E+08 | KD2-H4K8ac_peak_25622 | 9.89283  |                                                                                 |
| 6 | 167733989 | 1.68E+08 | KD2-H4K8ac_peak_25623 | 6.16888  |                                                                                 |
| 6 | 167764260 | 1.68E+08 | KD2-H4K8ac_peak_25624 | 12.82393 |                                                                                 |
| 6 | 167830129 | 1.68E+08 | KD2-H4K8ac_peak_25625 | 8.97719  |                                                                                 |
| 6 | 167834562 | 1.68E+08 | KD2-H4K8ac_peak_25626 | 5.14125  |                                                                                 |
| 6 | 168096901 | 1.68E+08 | KD2-H4K8ac_peak_25627 | 7.47462  |                                                                                 |
| 6 | 168099953 | 1.68E+08 | KD2-H4K8ac_peak_25628 | 8.28234  |                                                                                 |
| 6 | 168196696 | 1.68E+08 | KD2-H4K8ac_peak_25629 | 5.82799  | AL009178.1_ENSG00000269155;C6orf123_ENSG00000146521                             |
| 6 | 168226454 | 1.68E+08 | KD2-H4K8ac_peak_25630 | 13.09607 | MLLT4-AS1_ENSG00000198221;MLLT4_ENSG00000130396                                 |
| 6 | 168227697 | 1.68E+08 | KD2-H4K8ac_peak_25631 | 12.06346 | MLLT4-AS1_ENSG00000198221;MLLT4_ENSG00000130396                                 |
| 6 | 168435810 | 1.68E+08 | KD2-H4K8ac_peak_25632 | 10.21502 |                                                                                 |
| 6 | 168436251 | 1.68E+08 | KD2-H4K8ac_peak_25633 | 7.27716  |                                                                                 |
| 6 | 168496581 | 1.68E+08 | KD2-H4K8ac_peak_25634 | 7.79898  |                                                                                 |
| 6 | 168498065 | 1.68E+08 | KD2-H4K8ac_peak_25635 | 5.29555  |                                                                                 |
| 6 | 168498837 | 1.68E+08 | KD2-H4K8ac_peak_25636 | 4.67342  |                                                                                 |
| 6 | 168507828 | 1.69E+08 | KD2-H4K8ac_peak_25637 | 6.64891  |                                                                                 |
| 6 | 168558849 | 1.69E+08 | KD2-H4K8ac_peak_25638 | 7.13615  |                                                                                 |
| 6 | 168563777 | 1.69E+08 | KD2-H4K8ac_peak_25639 | 7.69294  |                                                                                 |
| 6 | 168653823 | 1.69E+08 | KD2-H4K8ac_peak_25640 | 10.21502 |                                                                                 |
| 6 | 168672715 | 1.69E+08 | KD2-H4K8ac_peak_25641 | 4.66652  |                                                                                 |
| 6 | 168694232 | 1.69E+08 | KD2-H4K8ac_peak_25642 | 3.75035  |                                                                                 |
| 6 | 169049614 | 1.69E+08 | KD2-H4K8ac_peak_25643 | 8.10216  |                                                                                 |
| 6 | 169613373 | 1.7E+08  | KD2-H4K8ac_peak_25644 | 12.42547 | XXyac-YX65C7_A.2_ENSG00000226445                                                |
| 6 | 170102338 | 1.7E+08  | KD2-H4K8ac_peak_25645 | 8.21852  | WDR27_ENSG00000184465;C6orf120_ENSG00000185127                                  |
| 6 | 170123775 | 1.7E+08  | KD2-H4K8ac_peak_25646 | 9.11031  | PHF10_ENSG00000130024                                                           |
| 6 | 170124281 | 1.7E+08  | KD2-H4K8ac_peak_25647 | 12.42547 | PHF10_ENSG00000130024                                                           |
| 6 | 170124882 | 1.7E+08  | KD2-H4K8ac_peak_25648 | 13.73635 | PHF10_ENSG00000130024;RP1-266L20.2_ENSG00000232640;RP1-266L20.4_ENSG00000227704 |
| 6 | 170151328 | 1.7E+08  | KD2-H4K8ac_peak_25649 | 7.95563  | TCTE3_ENSG00000184786;ERMARD_ENSG00000130023                                    |
| 6 | 170151771 | 1.7E+08  | KD2-H4K8ac_peak_25650 | 18.08366 | TCTE3_ENSG00000184786;ERMARD_ENSG00000130023                                    |
| 6 | 170190533 | 1.7E+08  | KD2-H4K8ac_peak_25651 | 8.30974  | LINC00574_ENSG00000231690                                                       |
| 6 | 170210463 | 1.7E+08  | KD2-H4K8ac_peak_25652 | 10.05606 | RP1-182D15.2_ENSG00000236173                                                    |
| 6 | 170403600 | 1.7E+08  | KD2-H4K8ac_peak_25653 | 4.56666  |                                                                                 |
| 6 | 170493405 | 1.7E+08  | KD2-H4K8ac_peak_25654 | 4.86324  | RP11-302L19.3_ENSG00000273100                                                   |
| 6 | 170552965 | 1.71E+08 | KD2-H4K8ac_peak_25655 | 9.1707   |                                                                                 |
| 6 | 170553827 | 1.71E+08 | KD2-H4K8ac_peak_25656 | 12.82393 |                                                                                 |
| 6 | 170615270 | 1.71E+08 | KD2-H4K8ac_peak_25657 | 6.99815  |                                                                                 |
| 6 | 170615895 | 1.71E+08 | KD2-H4K8ac_peak_25658 | 18.54875 |                                                                                 |
| 6 | 170746502 | 1.71E+08 | KD2-H4K8ac_peak_25659 | 11.05467 |                                                                                 |
| 6 | 170748137 | 1.71E+08 | KD2-H4K8ac_peak_25660 | 8.55271  |                                                                                 |
| 6 | 170863530 | 1.71E+08 | KD2-H4K8ac_peak_25661 | 21.60954 | TBP_ENSG00000112592                                                             |
| 6 | 170893198 | 1.71E+08 | KD2-H4K8ac_peak_25662 | 21.01976 | PDCD2_ENSG00000071994                                                           |
| 7 | 142030    | 143036   | KD2-H4K8ac_peak_25663 | 6.40297  |                                                                                 |
| 7 | 148930    | 149493   | KD2-H4K8ac_peak_25664 | 8.10216  | AC093627.9_ENSG00000242474;AC093627.10_ENSG00000240859                          |
| 7 | 149767    | 151095   | KD2-H4K8ac_peak_25665 | 29.64378 | AC093627.9_ENSG00000242474;AC093627.10_ENSG00000240859                          |
| 7 | 164648    | 165154   | KD2-H4K8ac_peak_25666 | 5.13615  | RP11-90P13.1_ENSG00000261795                                                    |

|   |         |         |                       |          |                                                    |
|---|---------|---------|-----------------------|----------|----------------------------------------------------|
| 7 | 362400  | 362704  | KD2-H4K8ac_peak_25667 | 7.98621  |                                                    |
| 7 | 495339  | 495771  | KD2-H4K8ac_peak_25668 | 13.87818 |                                                    |
| 7 | 504790  | 504992  | KD2-H4K8ac_peak_25669 | 6.03353  |                                                    |
| 7 | 532969  | 534158  | KD2-H4K8ac_peak_25670 | 21.50391 |                                                    |
| 7 | 750801  | 752187  | KD2-H4K8ac_peak_25671 | 17.42905 |                                                    |
| 7 | 752422  | 752868  | KD2-H4K8ac_peak_25672 | 21.67214 |                                                    |
| 7 | 765846  | 767013  | KD2-H4K8ac_peak_25673 | 27.73899 | PRKAR1B_ENSG00000188191;HEATR2_ENSG00000164818     |
| 7 | 767554  | 767767  | KD2-H4K8ac_peak_25674 | 4.86324  | PRKAR1B_ENSG00000188191                            |
| 7 | 806637  | 807001  | KD2-H4K8ac_peak_25675 | 4.98879  |                                                    |
| 7 | 807198  | 807671  | KD2-H4K8ac_peak_25676 | 14.43794 |                                                    |
| 7 | 808323  | 809228  | KD2-H4K8ac_peak_25677 | 11.82518 |                                                    |
| 7 | 809456  | 809854  | KD2-H4K8ac_peak_25678 | 6.99815  |                                                    |
| 7 | 810051  | 810544  | KD2-H4K8ac_peak_25679 | 18.54875 |                                                    |
| 7 | 810775  | 811073  | KD2-H4K8ac_peak_25680 | 8.79106  |                                                    |
| 7 | 819178  | 819371  | KD2-H4K8ac_peak_25681 | 6.59798  |                                                    |
| 7 | 841330  | 842274  | KD2-H4K8ac_peak_25682 | 7.76104  |                                                    |
| 7 | 855246  | 855729  | KD2-H4K8ac_peak_25683 | 11.92978 | SUN1_ENSG00000164828                               |
| 7 | 856331  | 856787  | KD2-H4K8ac_peak_25684 | 6.66359  | SUN1_ENSG00000164828                               |
| 7 | 915727  | 915919  | KD2-H4K8ac_peak_25685 | 6.66359  | GET4_ENSG00000239857                               |
| 7 | 916235  | 916846  | KD2-H4K8ac_peak_25686 | 10.24981 | GET4_ENSG00000239857                               |
| 7 | 937128  | 937575  | KD2-H4K8ac_peak_25687 | 7.34308  |                                                    |
| 7 | 940387  | 940581  | KD2-H4K8ac_peak_25688 | 6.36375  |                                                    |
| 7 | 940852  | 941120  | KD2-H4K8ac_peak_25689 | 6.31838  |                                                    |
| 7 | 941479  | 941888  | KD2-H4K8ac_peak_25690 | 17.8868  |                                                    |
| 7 | 948369  | 948566  | KD2-H4K8ac_peak_25691 | 7.49599  |                                                    |
| 7 | 949108  | 949516  | KD2-H4K8ac_peak_25692 | 6.65673  |                                                    |
| 7 | 1014887 | 1015136 | KD2-H4K8ac_peak_25693 | 17.92491 | COX19_ENSG00000240230                              |
| 7 | 1015368 | 1015710 | KD2-H4K8ac_peak_25694 | 9.44322  | COX19_ENSG00000240230                              |
| 7 | 1026007 | 1026203 | KD2-H4K8ac_peak_25695 | 5.87295  |                                                    |
| 7 | 1067338 | 1068283 | KD2-H4K8ac_peak_25696 | 16.54162 | AC073957.15_ENSG00000225146                        |
| 7 | 1121272 | 1121638 | KD2-H4K8ac_peak_25697 | 8.84853  | AC091729.8_ENSG00000226291;GPER1_ENSG00000164850   |
| 7 | 1121879 | 1122349 | KD2-H4K8ac_peak_25698 | 7.76104  | GPER1_ENSG00000164850                              |
| 7 | 1126279 | 1126596 | KD2-H4K8ac_peak_25699 | 8.58725  |                                                    |
| 7 | 1127658 | 1128023 | KD2-H4K8ac_peak_25700 | 5.3157   |                                                    |
| 7 | 1139896 | 1140150 | KD2-H4K8ac_peak_25701 | 3.90565  |                                                    |
| 7 | 1140458 | 1140767 | KD2-H4K8ac_peak_25702 | 11.50346 |                                                    |
| 7 | 1178118 | 1178641 | KD2-H4K8ac_peak_25703 | 14.275   | C7orf50_ENSG00000146540                            |
| 7 | 1181687 | 1181985 | KD2-H4K8ac_peak_25704 | 8.30974  |                                                    |
| 7 | 1182323 | 1182623 | KD2-H4K8ac_peak_25705 | 9.402    |                                                    |
| 7 | 1184074 | 1184475 | KD2-H4K8ac_peak_25706 | 10.30284 |                                                    |
| 7 | 1200076 | 1200789 | KD2-H4K8ac_peak_25707 | 24.12047 | ZFAND2A_ENSG00000178381;AC091729.9_ENSG00000229043 |
| 7 | 1215192 | 1216235 | KD2-H4K8ac_peak_25708 | 13.13969 |                                                    |
| 7 | 1543538 | 1543964 | KD2-H4K8ac_peak_25709 | 11.24702 |                                                    |
| 7 | 1544223 | 1544761 | KD2-H4K8ac_peak_25710 | 8.21523  | INTS1_ENSG00000164880                              |
| 7 | 1545198 | 1545420 | KD2-H4K8ac_peak_25711 | 5.53033  | INTS1_ENSG00000164880                              |
| 7 | 1546617 | 1547481 | KD2-H4K8ac_peak_25712 | 7.07117  |                                                    |

|   |         |         |                       |          |                                                 |
|---|---------|---------|-----------------------|----------|-------------------------------------------------|
| 7 | 1569586 | 1570122 | KD2-H4K8ac_peak_25713 | 10.17341 | MAFK_ENSG00000198517                            |
| 7 | 1594976 | 1595972 | KD2-H4K8ac_peak_25714 | 7.07117  |                                                 |
| 7 | 1609085 | 1610326 | KD2-H4K8ac_peak_25715 | 25.12968 | PSMG3_ENSG00000157778;PSMG3-AS1_ENSG00000230487 |
| 7 | 1625327 | 1627353 | KD2-H4K8ac_peak_25716 | 16.54484 |                                                 |
| 7 | 1677855 | 1678336 | KD2-H4K8ac_peak_25717 | 7.30812  |                                                 |
| 7 | 1678619 | 1679150 | KD2-H4K8ac_peak_25718 | 12.57865 |                                                 |
| 7 | 1679610 | 1681659 | KD2-H4K8ac_peak_25719 | 18.54875 |                                                 |
| 7 | 1681995 | 1682259 | KD2-H4K8ac_peak_25720 | 5.85291  |                                                 |
| 7 | 1687790 | 1688341 | KD2-H4K8ac_peak_25721 | 4.28151  |                                                 |
| 7 | 1690819 | 1691095 | KD2-H4K8ac_peak_25722 | 3.97079  |                                                 |
| 7 | 1706884 | 1707349 | KD2-H4K8ac_peak_25723 | 5.75757  |                                                 |
| 7 | 1753722 | 1753981 | KD2-H4K8ac_peak_25724 | 5.01002  |                                                 |
| 7 | 1755871 | 1756529 | KD2-H4K8ac_peak_25725 | 4.91674  |                                                 |
| 7 | 1782667 | 1783203 | KD2-H4K8ac_peak_25726 | 6.04107  | AC074389.9_ENSG00000236081                      |
| 7 | 1788123 | 1788597 | KD2-H4K8ac_peak_25727 | 10.03348 |                                                 |
| 7 | 1878306 | 1878534 | KD2-H4K8ac_peak_25728 | 5.13615  | AC110781.3_ENSG00000176349                      |
| 7 | 1878801 | 1879198 | KD2-H4K8ac_peak_25729 | 7.30812  | AC110781.3_ENSG00000176349                      |
| 7 | 1881406 | 1881601 | KD2-H4K8ac_peak_25730 | 5.75757  |                                                 |
| 7 | 1881885 | 1882380 | KD2-H4K8ac_peak_25731 | 5.349    |                                                 |
| 7 | 1895740 | 1896083 | KD2-H4K8ac_peak_25732 | 7.08655  |                                                 |
| 7 | 1896373 | 1897033 | KD2-H4K8ac_peak_25733 | 10.52259 |                                                 |
| 7 | 1897409 | 1897638 | KD2-H4K8ac_peak_25734 | 5.84991  |                                                 |
| 7 | 1962207 | 1962493 | KD2-H4K8ac_peak_25735 | 8.2413   |                                                 |
| 7 | 2041729 | 2042408 | KD2-H4K8ac_peak_25736 | 14.68449 |                                                 |
| 7 | 2105794 | 2105986 | KD2-H4K8ac_peak_25737 | 8.11476  |                                                 |
| 7 | 2106322 | 2106705 | KD2-H4K8ac_peak_25738 | 9.95119  |                                                 |
| 7 | 2118648 | 2118888 | KD2-H4K8ac_peak_25739 | 6.80488  |                                                 |
| 7 | 2119648 | 2119857 | KD2-H4K8ac_peak_25740 | 13.12288 |                                                 |
| 7 | 2121251 | 2121614 | KD2-H4K8ac_peak_25741 | 9.20193  |                                                 |
| 7 | 2122382 | 2122716 | KD2-H4K8ac_peak_25742 | 6.24372  |                                                 |
| 7 | 2142739 | 2144114 | KD2-H4K8ac_peak_25743 | 13.95627 |                                                 |
| 7 | 2144385 | 2145606 | KD2-H4K8ac_peak_25744 | 11.3923  |                                                 |
| 7 | 2146510 | 2147247 | KD2-H4K8ac_peak_25745 | 8.18596  |                                                 |
| 7 | 2148361 | 2148853 | KD2-H4K8ac_peak_25746 | 14.95121 |                                                 |
| 7 | 2150599 | 2150865 | KD2-H4K8ac_peak_25747 | 5.13615  |                                                 |
| 7 | 2178190 | 2178472 | KD2-H4K8ac_peak_25748 | 9.84999  |                                                 |
| 7 | 2190426 | 2190669 | KD2-H4K8ac_peak_25749 | 5.81188  |                                                 |
| 7 | 2191910 | 2192133 | KD2-H4K8ac_peak_25750 | 6.76298  |                                                 |
| 7 | 2201399 | 2201796 | KD2-H4K8ac_peak_25751 | 10.74343 |                                                 |
| 7 | 2202904 | 2203111 | KD2-H4K8ac_peak_25752 | 4.67342  |                                                 |
| 7 | 2203424 | 2203727 | KD2-H4K8ac_peak_25753 | 4.63016  |                                                 |
| 7 | 2209772 | 2210213 | KD2-H4K8ac_peak_25754 | 9.2116   |                                                 |
| 7 | 2212087 | 2212553 | KD2-H4K8ac_peak_25755 | 6.55628  |                                                 |
| 7 | 2226393 | 2226589 | KD2-H4K8ac_peak_25756 | 5.88845  |                                                 |
| 7 | 2268763 | 2269117 | KD2-H4K8ac_peak_25757 | 8.10216  |                                                 |
| 7 | 2272101 | 2273009 | KD2-H4K8ac_peak_25758 | 11.379   | MAD1L1_ENSG00000002822                          |

|   |         |         |                       |          |                                             |
|---|---------|---------|-----------------------|----------|---------------------------------------------|
| 7 | 2281078 | 2283169 | KD2-H4K8ac_peak_25759 | 20.2003  | FTSJ2_ENSG00000122687;NUDT1_ENSG00000106268 |
| 7 | 2320490 | 2320730 | KD2-H4K8ac_peak_25760 | 4.70206  |                                             |
| 7 | 2321378 | 2321750 | KD2-H4K8ac_peak_25761 | 19.28826 |                                             |
| 7 | 2353704 | 2353979 | KD2-H4K8ac_peak_25762 | 11.80283 |                                             |
| 7 | 2393199 | 2393516 | KD2-H4K8ac_peak_25763 | 4.67342  | SNX8_ENSG00000106266;EIF3B_ENSG00000106263  |
| 7 | 2393772 | 2394937 | KD2-H4K8ac_peak_25764 | 17.42905 | SNX8_ENSG00000106266;EIF3B_ENSG00000106263  |
| 7 | 2424217 | 2424575 | KD2-H4K8ac_peak_25765 | 3.83717  | AC004840.8_ENSG00000230914                  |
| 7 | 2439762 | 2440141 | KD2-H4K8ac_peak_25766 | 16.49944 |                                             |
| 7 | 2443397 | 2443816 | KD2-H4K8ac_peak_25767 | 6.40297  | CHST12_ENSG00000136213                      |
| 7 | 2449145 | 2449475 | KD2-H4K8ac_peak_25768 | 4.54006  |                                             |
| 7 | 2490848 | 2491041 | KD2-H4K8ac_peak_25769 | 3.83591  |                                             |
| 7 | 2491340 | 2492087 | KD2-H4K8ac_peak_25770 | 9.5953   |                                             |
| 7 | 2517129 | 2517790 | KD2-H4K8ac_peak_25771 | 8.56962  | GRIFIN_ENSG00000236734                      |
| 7 | 2535117 | 2535670 | KD2-H4K8ac_peak_25772 | 25.00847 |                                             |
| 7 | 2535873 | 2536220 | KD2-H4K8ac_peak_25773 | 8.01338  |                                             |
| 7 | 2548084 | 2549251 | KD2-H4K8ac_peak_25774 | 5.09772  |                                             |
| 7 | 2552127 | 2553262 | KD2-H4K8ac_peak_25775 | 6.84261  | LFNG_ENSG00000106003                        |
| 7 | 2553578 | 2554076 | KD2-H4K8ac_peak_25776 | 20.18584 |                                             |
| 7 | 2563163 | 2564296 | KD2-H4K8ac_peak_25777 | 8.0287   |                                             |
| 7 | 2594791 | 2596104 | KD2-H4K8ac_peak_25778 | 37.61861 | BRAT1_ENSG00000106009                       |
| 7 | 2598136 | 2598430 | KD2-H4K8ac_peak_25779 | 6.84261  | IQCE_ENSG00000106012                        |
| 7 | 2598978 | 2599263 | KD2-H4K8ac_peak_25780 | 6.28103  | IQCE_ENSG00000106012                        |
| 7 | 2653238 | 2653578 | KD2-H4K8ac_peak_25781 | 7.62396  |                                             |
| 7 | 2660681 | 2661130 | KD2-H4K8ac_peak_25782 | 5.59859  |                                             |
| 7 | 2661581 | 2662098 | KD2-H4K8ac_peak_25783 | 24.97362 |                                             |
| 7 | 2662418 | 2663248 | KD2-H4K8ac_peak_25784 | 8.3261   |                                             |
| 7 | 2666166 | 2666555 | KD2-H4K8ac_peak_25785 | 9.66628  |                                             |
| 7 | 2670797 | 2671252 | KD2-H4K8ac_peak_25786 | 21.47208 | TTYH3_ENSG00000136295                       |
| 7 | 2671647 | 2672513 | KD2-H4K8ac_peak_25787 | 12.66141 | TTYH3_ENSG00000136295                       |
| 7 | 2677750 | 2678233 | KD2-H4K8ac_peak_25788 | 11.52765 |                                             |
| 7 | 2678470 | 2678796 | KD2-H4K8ac_peak_25789 | 7.92775  |                                             |
| 7 | 2681078 | 2681803 | KD2-H4K8ac_peak_25790 | 5.13615  |                                             |
| 7 | 2684311 | 2684877 | KD2-H4K8ac_peak_25791 | 5.26288  |                                             |
| 7 | 2685214 | 2685646 | KD2-H4K8ac_peak_25792 | 7.62396  |                                             |
| 7 | 2798032 | 2798695 | KD2-H4K8ac_peak_25793 | 14.99806 |                                             |
| 7 | 2799459 | 2799921 | KD2-H4K8ac_peak_25794 | 6.60096  |                                             |
| 7 | 2884343 | 2884712 | KD2-H4K8ac_peak_25795 | 9.36516  | GNA12_ENSG00000146535                       |
| 7 | 2926191 | 2926600 | KD2-H4K8ac_peak_25796 | 7.25989  |                                             |
| 7 | 2967986 | 2968279 | KD2-H4K8ac_peak_25797 | 5.4919   |                                             |
| 7 | 2968895 | 2969797 | KD2-H4K8ac_peak_25798 | 8.12964  |                                             |
| 7 | 3066157 | 3066441 | KD2-H4K8ac_peak_25799 | 13.73635 |                                             |
| 7 | 3067070 | 3068067 | KD2-H4K8ac_peak_25800 | 13.73635 |                                             |
| 7 | 3068801 | 3069394 | KD2-H4K8ac_peak_25801 | 20.46575 |                                             |
| 7 | 3069650 | 3070007 | KD2-H4K8ac_peak_25802 | 4.86324  |                                             |
| 7 | 3072832 | 3073641 | KD2-H4K8ac_peak_25803 | 5.04587  |                                             |
| 7 | 3094133 | 3094505 | KD2-H4K8ac_peak_25804 | 5.51783  |                                             |

|   |         |         |                       |          |                                                    |
|---|---------|---------|-----------------------|----------|----------------------------------------------------|
| 7 | 3112491 | 3112989 | KD2-H4K8ac_peak_25805 | 10.05606 |                                                    |
| 7 | 3113338 | 3113738 | KD2-H4K8ac_peak_25806 | 7.67504  |                                                    |
| 7 | 3189337 | 3189958 | KD2-H4K8ac_peak_25807 | 7.13615  |                                                    |
| 7 | 3205685 | 3205915 | KD2-H4K8ac_peak_25808 | 4.2043   |                                                    |
| 7 | 3282525 | 3283741 | KD2-H4K8ac_peak_25809 | 15.74255 |                                                    |
| 7 | 3284031 | 3284402 | KD2-H4K8ac_peak_25810 | 6.05809  |                                                    |
| 7 | 3285642 | 3285845 | KD2-H4K8ac_peak_25811 | 4.79789  |                                                    |
| 7 | 3286405 | 3286602 | KD2-H4K8ac_peak_25812 | 8.40646  |                                                    |
| 7 | 3339798 | 3340594 | KD2-H4K8ac_peak_25813 | 23.33626 | SDK1_ENSG00000146555                               |
| 7 | 3341451 | 3341722 | KD2-H4K8ac_peak_25814 | 4.67342  | SDK1_ENSG00000146555;AC073316.1_ENSG00000236708    |
| 7 | 3794766 | 3795061 | KD2-H4K8ac_peak_25815 | 9.51625  |                                                    |
| 7 | 4046839 | 4047127 | KD2-H4K8ac_peak_25816 | 4.54006  |                                                    |
| 7 | 4091316 | 4091706 | KD2-H4K8ac_peak_25817 | 15.039   |                                                    |
| 7 | 4179783 | 4180240 | KD2-H4K8ac_peak_25818 | 4.91674  |                                                    |
| 7 | 4183137 | 4184475 | KD2-H4K8ac_peak_25819 | 20.18381 |                                                    |
| 7 | 4184753 | 4185575 | KD2-H4K8ac_peak_25820 | 17.69527 |                                                    |
| 7 | 4229090 | 4229498 | KD2-H4K8ac_peak_25821 | 8.6202   |                                                    |
| 7 | 4230096 | 4230601 | KD2-H4K8ac_peak_25822 | 12.35756 |                                                    |
| 7 | 4347965 | 4348160 | KD2-H4K8ac_peak_25823 | 6.24114  |                                                    |
| 7 | 4456530 | 4456862 | KD2-H4K8ac_peak_25824 | 3.97079  |                                                    |
| 7 | 4680844 | 4681319 | KD2-H4K8ac_peak_25825 | 9.95759  |                                                    |
| 7 | 4681694 | 4682325 | KD2-H4K8ac_peak_25826 | 11.50346 |                                                    |
| 7 | 4690538 | 4690793 | KD2-H4K8ac_peak_25827 | 3.90565  |                                                    |
| 7 | 4721227 | 4721793 | KD2-H4K8ac_peak_25828 | 23.28866 |                                                    |
| 7 | 4742568 | 4743078 | KD2-H4K8ac_peak_25829 | 7.76329  |                                                    |
| 7 | 4765290 | 4765521 | KD2-H4K8ac_peak_25830 | 4.86324  |                                                    |
| 7 | 4779292 | 4779774 | KD2-H4K8ac_peak_25831 | 5.56817  |                                                    |
| 7 | 4814334 | 4815028 | KD2-H4K8ac_peak_25832 | 10.7186  | AP5Z1_ENSG00000242802                              |
| 7 | 4870085 | 4870283 | KD2-H4K8ac_peak_25833 | 5.66705  |                                                    |
| 7 | 4885693 | 4885936 | KD2-H4K8ac_peak_25834 | 5.92591  |                                                    |
| 7 | 4911007 | 4911328 | KD2-H4K8ac_peak_25835 | 6.84261  |                                                    |
| 7 | 4911627 | 4911974 | KD2-H4K8ac_peak_25836 | 7.92775  |                                                    |
| 7 | 4912332 | 4912748 | KD2-H4K8ac_peak_25837 | 7.27573  |                                                    |
| 7 | 4913571 | 4913899 | KD2-H4K8ac_peak_25838 | 4.0809   |                                                    |
| 7 | 4914119 | 4914336 | KD2-H4K8ac_peak_25839 | 4.211    |                                                    |
| 7 | 4922684 | 4923256 | KD2-H4K8ac_peak_25840 | 14.80472 | RADIL_ENSG00000157927                              |
| 7 | 4998370 | 4998605 | KD2-H4K8ac_peak_25841 | 11.79585 | MMD2_ENSG00000136297                               |
| 7 | 5084720 | 5086203 | KD2-H4K8ac_peak_25842 | 11.67741 | RBAK_ENSG00000146587                               |
| 7 | 5111918 | 5112128 | KD2-H4K8ac_peak_25843 | 7.23581  | RBAKDN_ENSG00000273313                             |
| 7 | 5216422 | 5217446 | KD2-H4K8ac_peak_25844 | 12.43831 |                                                    |
| 7 | 5229127 | 5229652 | KD2-H4K8ac_peak_25845 | 13.51987 | WIPI2_ENSG00000157954                              |
| 7 | 5230099 | 5230353 | KD2-H4K8ac_peak_25846 | 11.00004 | WIPI2_ENSG00000157954                              |
| 7 | 5280084 | 5280531 | KD2-H4K8ac_peak_25847 | 16.53429 |                                                    |
| 7 | 5280749 | 5281210 | KD2-H4K8ac_peak_25848 | 5.30799  |                                                    |
| 7 | 5314748 | 5315312 | KD2-H4K8ac_peak_25849 | 8.56962  | SLC29A4_ENSG00000164638;AC093376.1_ENSG00000263808 |
| 7 | 5315680 | 5316417 | KD2-H4K8ac_peak_25850 | 12.88702 | AC093376.1_ENSG00000263808                         |

|   |         |         |                       |          |                                                               |
|---|---------|---------|-----------------------|----------|---------------------------------------------------------------|
| 7 | 5316769 | 5317093 | KD2-H4K8ac_peak_25851 | 9.26408  | AC093376.1_ENSG00000263808                                    |
| 7 | 5321141 | 5321413 | KD2-H4K8ac_peak_25852 | 3.90565  |                                                               |
| 7 | 5322585 | 5323162 | KD2-H4K8ac_peak_25853 | 14.3305  |                                                               |
| 7 | 5421789 | 5422042 | KD2-H4K8ac_peak_25854 | 5.4919   |                                                               |
| 7 | 5460518 | 5460858 | KD2-H4K8ac_peak_25855 | 5.75757  |                                                               |
| 7 | 5462957 | 5463329 | KD2-H4K8ac_peak_25856 | 7.44247  |                                                               |
| 7 | 5463875 | 5464322 | KD2-H4K8ac_peak_25857 | 8.99996  | TNRC18_ENSG00000182095                                        |
| 7 | 5464678 | 5464975 | KD2-H4K8ac_peak_25858 | 15.66774 | TNRC18_ENSG00000182095;RP11-1275H24.2_ENSG00000272953         |
| 7 | 5465320 | 5465772 | KD2-H4K8ac_peak_25859 | 20.02905 | TNRC18_ENSG00000182095;RP11-1275H24.2_ENSG00000272953         |
| 7 | 5465992 | 5466675 | KD2-H4K8ac_peak_25860 | 22.92963 | TNRC18_ENSG00000182095;RP11-1275H24.2_ENSG00000272953         |
| 7 | 5466917 | 5468235 | KD2-H4K8ac_peak_25861 | 19.28826 | RP11-1275H24.1_ENSG00000234432;RP11-1275H24.3_ENSG00000273084 |
| 7 | 5468785 | 5469708 | KD2-H4K8ac_peak_25862 | 12.57865 | RP11-1275H24.1_ENSG00000234432;RP11-1275H24.3_ENSG00000273084 |
| 7 | 5517721 | 5518548 | KD2-H4K8ac_peak_25863 | 8.65175  |                                                               |
| 7 | 5518901 | 5519337 | KD2-H4K8ac_peak_25864 | 8.2413   |                                                               |
| 7 | 5519644 | 5519897 | KD2-H4K8ac_peak_25865 | 4.42337  |                                                               |
| 7 | 5553122 | 5553783 | KD2-H4K8ac_peak_25866 | 21.09086 | FBXL18_ENSG00000155034                                        |
| 7 | 5553988 | 5554558 | KD2-H4K8ac_peak_25867 | 6.0605   | FBXL18_ENSG00000155034                                        |
| 7 | 5568945 | 5569287 | KD2-H4K8ac_peak_25868 | 10.09705 |                                                               |
| 7 | 5569780 | 5570938 | KD2-H4K8ac_peak_25869 | 27.81039 |                                                               |
| 7 | 5594540 | 5596644 | KD2-H4K8ac_peak_25870 | 23.72199 | CTB-161C1.1_ENSG00000272719                                   |
| 7 | 5601101 | 5601582 | KD2-H4K8ac_peak_25871 | 11.5328  | AC006483.5_ENSG00000228974                                    |
| 7 | 5601851 | 5602345 | KD2-H4K8ac_peak_25872 | 17.09549 |                                                               |
| 7 | 5609398 | 5609815 | KD2-H4K8ac_peak_25873 | 16.89142 |                                                               |
| 7 | 5610021 | 5610551 | KD2-H4K8ac_peak_25874 | 20.64015 |                                                               |
| 7 | 5613463 | 5614107 | KD2-H4K8ac_peak_25875 | 8.63033  |                                                               |
| 7 | 5614587 | 5615224 | KD2-H4K8ac_peak_25876 | 15.51136 |                                                               |
| 7 | 5631983 | 5632236 | KD2-H4K8ac_peak_25877 | 7.92924  | FSCN1_ENSG00000075618                                         |
| 7 | 5633269 | 5633541 | KD2-H4K8ac_peak_25878 | 6.15163  | FSCN1_ENSG00000075618                                         |
| 7 | 5634163 | 5634747 | KD2-H4K8ac_peak_25879 | 16.77041 |                                                               |
| 7 | 5636020 | 5636244 | KD2-H4K8ac_peak_25880 | 4.84794  |                                                               |
| 7 | 5666989 | 5667473 | KD2-H4K8ac_peak_25881 | 6.16883  |                                                               |
| 7 | 5672499 | 5673429 | KD2-H4K8ac_peak_25882 | 5.59859  |                                                               |
| 7 | 5674222 | 5674797 | KD2-H4K8ac_peak_25883 | 20.30085 |                                                               |
| 7 | 5675105 | 5675330 | KD2-H4K8ac_peak_25884 | 9.62006  |                                                               |
| 7 | 5676696 | 5677765 | KD2-H4K8ac_peak_25885 | 6.72464  |                                                               |
| 7 | 5730626 | 5730922 | KD2-H4K8ac_peak_25886 | 7.79634  |                                                               |
| 7 | 5821599 | 5822109 | KD2-H4K8ac_peak_25887 | 11.79585 | RNF216_ENSG00000011275                                        |
| 7 | 5861737 | 5862464 | KD2-H4K8ac_peak_25888 | 12.82393 | ZNF815P_ENSG00000235944                                       |
| 7 | 5862755 | 5863504 | KD2-H4K8ac_peak_25889 | 20.40378 | ZNF815P_ENSG00000235944                                       |
| 7 | 5936865 | 5937063 | KD2-H4K8ac_peak_25890 | 6.30229  |                                                               |
| 7 | 5937464 | 5937766 | KD2-H4K8ac_peak_25891 | 13.81781 | CCZ1_ENSG00000122674                                          |
| 7 | 5937966 | 5938287 | KD2-H4K8ac_peak_25892 | 22.21705 | CCZ1_ENSG00000122674                                          |
| 7 | 6048124 | 6048655 | KD2-H4K8ac_peak_25893 | 18.40451 | PMS2_ENSG00000122512;AIMP2_ENSG00000106305                    |
| 7 | 6048926 | 6049425 | KD2-H4K8ac_peak_25894 | 7.49599  | PMS2_ENSG00000122512;AIMP2_ENSG00000106305                    |
| 7 | 6098375 | 6098785 | KD2-H4K8ac_peak_25895 | 13.77586 | EIF2AK1_ENSG00000086232                                       |
| 7 | 6099035 | 6099444 | KD2-H4K8ac_peak_25896 | 9.90914  | EIF2AK1_ENSG00000086232                                       |

|   |         |         |                       |          |                                                   |
|---|---------|---------|-----------------------|----------|---------------------------------------------------|
| 7 | 6120610 | 6121031 | KD2-H4K8ac_peak_25897 | 5.13615  | AC004895.4_ENSG00000231704                        |
| 7 | 6121837 | 6122213 | KD2-H4K8ac_peak_25898 | 13.73635 | AC004895.1_ENSG00000264605                        |
| 7 | 6143972 | 6144193 | KD2-H4K8ac_peak_25899 | 5.3157   | USP42_ENSG00000106346                             |
| 7 | 6144639 | 6145012 | KD2-H4K8ac_peak_25900 | 8.58069  | USP42_ENSG00000106346                             |
| 7 | 6204860 | 6205092 | KD2-H4K8ac_peak_25901 | 4.90047  |                                                   |
| 7 | 6211761 | 6212129 | KD2-H4K8ac_peak_25902 | 8.5092   |                                                   |
| 7 | 6266066 | 6266553 | KD2-H4K8ac_peak_25903 | 5.88845  |                                                   |
| 7 | 6312412 | 6312827 | KD2-H4K8ac_peak_25904 | 13.51987 | CYTH3_ENSG0000008256                              |
| 7 | 6347353 | 6347724 | KD2-H4K8ac_peak_25905 | 8.30094  |                                                   |
| 7 | 6388243 | 6388510 | KD2-H4K8ac_peak_25906 | 4.33139  | FAM220A_ENSG00000178397                           |
| 7 | 6388833 | 6389046 | KD2-H4K8ac_peak_25907 | 9.34195  | FAM220A_ENSG00000178397                           |
| 7 | 6413013 | 6413873 | KD2-H4K8ac_peak_25908 | 10.82243 | RAC1_ENSG00000136238                              |
| 7 | 6414169 | 6414744 | KD2-H4K8ac_peak_25909 | 20.46575 | RAC1_ENSG00000136238                              |
| 7 | 6487177 | 6487442 | KD2-H4K8ac_peak_25910 | 6.99194  |                                                   |
| 7 | 6523771 | 6524398 | KD2-H4K8ac_peak_25911 | 10.73392 | KDELR2_ENSG00000136240;FLJ20306_ENSG00000269781   |
| 7 | 6535895 | 6536198 | KD2-H4K8ac_peak_25912 | 5.405    |                                                   |
| 7 | 6542967 | 6543217 | KD2-H4K8ac_peak_25913 | 9.95119  |                                                   |
| 7 | 6544114 | 6544715 | KD2-H4K8ac_peak_25914 | 15.58442 |                                                   |
| 7 | 6566032 | 6566564 | KD2-H4K8ac_peak_25915 | 7.38799  |                                                   |
| 7 | 6576662 | 6576905 | KD2-H4K8ac_peak_25916 | 18.37277 |                                                   |
| 7 | 6616139 | 6616424 | KD2-H4K8ac_peak_25917 | 15.61313 | ZDHHC4_ENSG00000136247                            |
| 7 | 6616982 | 6617926 | KD2-H4K8ac_peak_25918 | 20.30085 | ZDHHC4_ENSG00000136247                            |
| 7 | 6629697 | 6630244 | KD2-H4K8ac_peak_25919 | 18.79293 | C7orf26_ENSG00000146576                           |
| 7 | 6654405 | 6655133 | KD2-H4K8ac_peak_25920 | 20.18584 | ZNF853_ENSG00000236609                            |
| 7 | 6655344 | 6656306 | KD2-H4K8ac_peak_25921 | 20.5798  | ZNF853_ENSG00000236609                            |
| 7 | 6656906 | 6657108 | KD2-H4K8ac_peak_25922 | 6.18308  |                                                   |
| 7 | 6676188 | 6677059 | KD2-H4K8ac_peak_25923 | 16.13752 | ZNF316_ENSG00000205903                            |
| 7 | 6677267 | 6677925 | KD2-H4K8ac_peak_25924 | 8.21852  | ZNF316_ENSG00000205903                            |
| 7 | 6703516 | 6704082 | KD2-H4K8ac_peak_25925 | 21.79955 | AC073343.13_ENSG00000228010                       |
| 7 | 6746044 | 6746537 | KD2-H4K8ac_peak_25926 | 10.54778 | ZNF12_ENSG00000164631                             |
| 7 | 6746781 | 6747091 | KD2-H4K8ac_peak_25927 | 11.28831 | ZNF12_ENSG00000164631                             |
| 7 | 6768649 | 6769964 | KD2-H4K8ac_peak_25928 | 13.77586 |                                                   |
| 7 | 6894529 | 6895830 | KD2-H4K8ac_peak_25929 | 20.30085 |                                                   |
| 7 | 6967898 | 6968171 | KD2-H4K8ac_peak_25930 | 5.04587  |                                                   |
| 7 | 7221286 | 7221624 | KD2-H4K8ac_peak_25931 | 5.02474  |                                                   |
| 7 | 7222377 | 7222674 | KD2-H4K8ac_peak_25932 | 4.76255  |                                                   |
| 7 | 7469302 | 7469496 | KD2-H4K8ac_peak_25933 | 8.33649  |                                                   |
| 7 | 7606299 | 7607138 | KD2-H4K8ac_peak_25934 | 15.58442 | RP5-1159O4.1_ENSG00000272894;MIOS_ENSG00000164654 |
| 7 | 7621207 | 7621461 | KD2-H4K8ac_peak_25935 | 8.66387  |                                                   |
| 7 | 7679747 | 7680000 | KD2-H4K8ac_peak_25936 | 9.78882  | RPA3-AS1_ENSG00000219545                          |
| 7 | 8008477 | 8008729 | KD2-H4K8ac_peak_25937 | 11.379   | AC006042.7_ENSG00000233108                        |
| 7 | 8008958 | 8009412 | KD2-H4K8ac_peak_25938 | 9.18237  | AC006042.7_ENSG00000233108                        |
| 7 | 8254703 | 8254954 | KD2-H4K8ac_peak_25939 | 5.92591  |                                                   |
| 7 | 8255691 | 8255911 | KD2-H4K8ac_peak_25940 | 3.65228  |                                                   |
| 7 | 8265958 | 8266213 | KD2-H4K8ac_peak_25941 | 4.8485   |                                                   |
| 7 | 8270413 | 8270964 | KD2-H4K8ac_peak_25942 | 11.96169 |                                                   |



|   |          |          |                       |          |                                                                            |
|---|----------|----------|-----------------------|----------|----------------------------------------------------------------------------|
| 7 | 8273115  | 8273328  | KD2-H4K8ac_peak_25943 | 5.01002  |                                                                            |
| 7 | 8273598  | 8274086  | KD2-H4K8ac_peak_25944 | 11.92978 |                                                                            |
| 7 | 8276436  | 8276766  | KD2-H4K8ac_peak_25945 | 4.37809  |                                                                            |
| 7 | 8298525  | 8299035  | KD2-H4K8ac_peak_25946 | 6.66692  |                                                                            |
| 7 | 8300810  | 8302394  | KD2-H4K8ac_peak_25947 | 27.01413 | ICA1_ENSG00000003147;AC007009.1_ENSG00000244239;AC007128.1_ENSG00000229970 |
| 7 | 8329842  | 8330446  | KD2-H4K8ac_peak_25948 | 9.51625  |                                                                            |
| 7 | 8331709  | 8332084  | KD2-H4K8ac_peak_25949 | 11.24702 |                                                                            |
| 7 | 8473128  | 8473425  | KD2-H4K8ac_peak_25950 | 7.08655  | NXPH1_ENSG00000122584                                                      |
| 7 | 10119261 | 10119462 | KD2-H4K8ac_peak_25951 | 7.15405  |                                                                            |
| 7 | 10141009 | 10141252 | KD2-H4K8ac_peak_25952 | 4.37708  |                                                                            |
| 7 | 10144039 | 10144268 | KD2-H4K8ac_peak_25953 | 5.80249  |                                                                            |
| 7 | 10161325 | 10161589 | KD2-H4K8ac_peak_25954 | 4.86324  |                                                                            |
| 7 | 10161977 | 10162247 | KD2-H4K8ac_peak_25955 | 5.54647  |                                                                            |
| 7 | 10163586 | 10163822 | KD2-H4K8ac_peak_25956 | 5.54647  |                                                                            |
| 7 | 10164403 | 10164685 | KD2-H4K8ac_peak_25957 | 6.09229  |                                                                            |
| 7 | 10175734 | 10175937 | KD2-H4K8ac_peak_25958 | 4.73064  |                                                                            |
| 7 | 10448822 | 10449170 | KD2-H4K8ac_peak_25959 | 7.12754  |                                                                            |
| 7 | 10979490 | 10979979 | KD2-H4K8ac_peak_25960 | 14.8083  | NDUFA4_ENSG00000189043;RP5-855F16.1_ENSG00000271185                        |
| 7 | 10980289 | 10980873 | KD2-H4K8ac_peak_25961 | 10.43145 | NDUFA4_ENSG00000189043;RP5-855F16.1_ENSG00000271185                        |
| 7 | 11012422 | 11012699 | KD2-H4K8ac_peak_25962 | 11.43863 | PHF14_ENSG00000106443                                                      |
| 7 | 11013574 | 11014304 | KD2-H4K8ac_peak_25963 | 13.73635 | PHF14_ENSG00000106443                                                      |
| 7 | 11190906 | 11191109 | KD2-H4K8ac_peak_25964 | 4.77079  |                                                                            |
| 7 | 11233119 | 11233328 | KD2-H4K8ac_peak_25965 | 5.40356  |                                                                            |
| 7 | 11815949 | 11816209 | KD2-H4K8ac_peak_25966 | 6.54442  |                                                                            |
| 7 | 11820741 | 11821064 | KD2-H4K8ac_peak_25967 | 7.01964  |                                                                            |
| 7 | 11837286 | 11837479 | KD2-H4K8ac_peak_25968 | 5.14125  |                                                                            |
| 7 | 11871260 | 11872042 | KD2-H4K8ac_peak_25969 | 9.95759  | THSD7A_ENSG00000005108                                                     |
| 7 | 11873154 | 11873642 | KD2-H4K8ac_peak_25970 | 7.26089  |                                                                            |
| 7 | 12129640 | 12130615 | KD2-H4K8ac_peak_25971 | 7.33452  |                                                                            |
| 7 | 12131684 | 12132163 | KD2-H4K8ac_peak_25972 | 8.30974  |                                                                            |
| 7 | 12151122 | 12151834 | KD2-H4K8ac_peak_25973 | 6.20982  |                                                                            |
| 7 | 12191410 | 12191617 | KD2-H4K8ac_peak_25974 | 4.37708  |                                                                            |
| 7 | 12250974 | 12251305 | KD2-H4K8ac_peak_25975 | 16.67374 | TMEM106B_ENSG00000106460                                                   |
| 7 | 12424927 | 12425231 | KD2-H4K8ac_peak_25976 | 4.01115  |                                                                            |
| 7 | 12443209 | 12443765 | KD2-H4K8ac_peak_25977 | 9.67696  | VWDE_ENSG00000146530                                                       |
| 7 | 12444197 | 12444424 | KD2-H4K8ac_peak_25978 | 5.9696   | VWDE_ENSG00000146530                                                       |
| 7 | 12726247 | 12727043 | KD2-H4K8ac_peak_25979 | 19.72564 | CTD-2320J21.1_ENSG00000271253;ARL4A_ENSG00000122644                        |
| 7 | 14029142 | 14029758 | KD2-H4K8ac_peak_25980 | 15.59774 |                                                                            |
| 7 | 14031704 | 14031900 | KD2-H4K8ac_peak_25981 | 11.05407 | ETV1_ENSG00000006468                                                       |
| 7 | 16460370 | 16461173 | KD2-H4K8ac_peak_25982 | 10.43145 | ISPD_ENSG00000214960                                                       |
| 7 | 16623277 | 16623569 | KD2-H4K8ac_peak_25983 | 4.24345  |                                                                            |
| 7 | 16684321 | 16684587 | KD2-H4K8ac_peak_25984 | 4.44527  | ANKMY2_ENSG00000106524                                                     |
| 7 | 16685533 | 16686321 | KD2-H4K8ac_peak_25985 | 10.21366 | ANKMY2_ENSG00000106524;BZW2_ENSG00000136261                                |
| 7 | 16792853 | 16793222 | KD2-H4K8ac_peak_25986 | 6.99815  | TSPAN13_ENSG00000106537                                                    |
| 7 | 16793569 | 16793937 | KD2-H4K8ac_peak_25987 | 5.14125  | TSPAN13_ENSG00000106537                                                    |
| 7 | 17979543 | 17980587 | KD2-H4K8ac_peak_25988 | 21.61343 | SNX13_ENSG00000071189                                                      |

|   |          |          |                       |          |                                                    |
|---|----------|----------|-----------------------|----------|----------------------------------------------------|
| 7 | 18519940 | 18520283 | KD2-H4K8ac_peak_25989 | 7.27716  |                                                    |
| 7 | 18529745 | 18530043 | KD2-H4K8ac_peak_25990 | 4.52326  |                                                    |
| 7 | 18535763 | 18536390 | KD2-H4K8ac_peak_25991 | 8.28234  |                                                    |
| 7 | 18592949 | 18593155 | KD2-H4K8ac_peak_25992 | 8.17902  |                                                    |
| 7 | 18736638 | 18736846 | KD2-H4K8ac_peak_25993 | 6.2781   |                                                    |
| 7 | 18738673 | 18738987 | KD2-H4K8ac_peak_25994 | 4.42765  |                                                    |
| 7 | 18739806 | 18740467 | KD2-H4K8ac_peak_25995 | 9.11031  |                                                    |
| 7 | 18741335 | 18742050 | KD2-H4K8ac_peak_25996 | 9.08816  |                                                    |
| 7 | 18743555 | 18743865 | KD2-H4K8ac_peak_25997 | 4.67342  |                                                    |
| 7 | 18821980 | 18822358 | KD2-H4K8ac_peak_25998 | 4.86324  |                                                    |
| 7 | 18844535 | 18844736 | KD2-H4K8ac_peak_25999 | 6.56211  |                                                    |
| 7 | 18862051 | 18862287 | KD2-H4K8ac_peak_26000 | 4.67342  |                                                    |
| 7 | 18868540 | 18868938 | KD2-H4K8ac_peak_26001 | 5.23279  |                                                    |
| 7 | 18870113 | 18870311 | KD2-H4K8ac_peak_26002 | 5.82799  |                                                    |
| 7 | 18885216 | 18886050 | KD2-H4K8ac_peak_26003 | 19.60591 |                                                    |
| 7 | 18887055 | 18887340 | KD2-H4K8ac_peak_26004 | 7.40314  |                                                    |
| 7 | 18895186 | 18895459 | KD2-H4K8ac_peak_26005 | 6.16888  |                                                    |
| 7 | 19132239 | 19132438 | KD2-H4K8ac_peak_26006 | 7.8711   |                                                    |
| 7 | 19140263 | 19140498 | KD2-H4K8ac_peak_26007 | 5.57044  |                                                    |
| 7 | 19145798 | 19146665 | KD2-H4K8ac_peak_26008 | 9.41619  |                                                    |
| 7 | 19146945 | 19147663 | KD2-H4K8ac_peak_26009 | 10.7186  |                                                    |
| 7 | 19147926 | 19148346 | KD2-H4K8ac_peak_26010 | 24.46918 |                                                    |
| 7 | 19151279 | 19151501 | KD2-H4K8ac_peak_26011 | 8.11396  | AC003986.6_ENSG00000232821                         |
| 7 | 19152014 | 19152408 | KD2-H4K8ac_peak_26012 | 18.37277 | AC003986.6_ENSG00000232821                         |
| 7 | 19156011 | 19156535 | KD2-H4K8ac_peak_26013 | 11.8457  | TWIST1_ENSG00000122691                             |
| 7 | 19156741 | 19157154 | KD2-H4K8ac_peak_26014 | 11.92978 | TWIST1_ENSG00000122691                             |
| 7 | 19157855 | 19158195 | KD2-H4K8ac_peak_26015 | 14.68449 | TWIST1_ENSG00000122691                             |
| 7 | 19284880 | 19285617 | KD2-H4K8ac_peak_26016 | 7.76104  |                                                    |
| 7 | 19748165 | 19749386 | KD2-H4K8ac_peak_26017 | 12.06346 | TWISTNB_ENSG00000105849                            |
| 7 | 20369701 | 20371712 | KD2-H4K8ac_peak_26018 | 17.42905 | CTA-293F17.1_ENSG00000271133;ITGB8_ENSG00000105855 |
| 7 | 20448266 | 20448462 | KD2-H4K8ac_peak_26019 | 6.40683  |                                                    |
| 7 | 20502304 | 20502519 | KD2-H4K8ac_peak_26020 | 6.40683  |                                                    |
| 7 | 20599020 | 20599258 | KD2-H4K8ac_peak_26021 | 4.87807  |                                                    |
| 7 | 21466413 | 21466678 | KD2-H4K8ac_peak_26022 | 4.44748  | SP4_ENSG00000105866                                |
| 7 | 21467144 | 21467416 | KD2-H4K8ac_peak_26023 | 9.61895  | SP4_ENSG00000105866                                |
| 7 | 21985532 | 21985761 | KD2-H4K8ac_peak_26024 | 13.3695  | CDCA7L_ENSG00000164649                             |
| 7 | 22395765 | 22396813 | KD2-H4K8ac_peak_26025 | 10.43145 | RAPGEF5_ENSG00000136237                            |
| 7 | 22861738 | 22862364 | KD2-H4K8ac_peak_26026 | 13.81781 | TOMM7_ENSG00000196683                              |
| 7 | 22862664 | 22863093 | KD2-H4K8ac_peak_26027 | 5.82799  | TOMM7_ENSG00000196683                              |
| 7 | 23075370 | 23075787 | KD2-H4K8ac_peak_26028 | 10.21502 |                                                    |
| 7 | 23220705 | 23222092 | KD2-H4K8ac_peak_26029 | 22.5974  | NUPL2_ENSG00000136243                              |
| 7 | 23245725 | 23246124 | KD2-H4K8ac_peak_26030 | 9.95759  | AC005082.12_ENSG00000226816                        |
| 7 | 23338313 | 23338759 | KD2-H4K8ac_peak_26031 | 16.95032 | MALSU1_ENSG00000156928                             |
| 7 | 23508213 | 23509687 | KD2-H4K8ac_peak_26032 | 20.5798  | IGF2BP3_ENSG00000136231                            |
| 7 | 23510826 | 23511413 | KD2-H4K8ac_peak_26033 | 6.01098  | IGF2BP3_ENSG00000136231                            |
| 7 | 23513164 | 23513919 | KD2-H4K8ac_peak_26034 | 19.25648 |                                                    |

|   |          |          |                       |          |                                                     |
|---|----------|----------|-----------------------|----------|-----------------------------------------------------|
| 7 | 23514474 | 23514737 | KD2-H4K8ac_peak_26035 | 10.05606 |                                                     |
| 7 | 23530145 | 23530769 | KD2-H4K8ac_peak_26036 | 9.07715  | RPS2P32_ENSG00000232818;Y_RNA_ENSG00000200847       |
| 7 | 23571175 | 23571401 | KD2-H4K8ac_peak_26037 | 9.26402  | TRA2A_ENSG00000164548                               |
| 7 | 23571876 | 23572445 | KD2-H4K8ac_peak_26038 | 4.91674  | TRA2A_ENSG00000164548                               |
| 7 | 23610659 | 23610865 | KD2-H4K8ac_peak_26039 | 6.25869  |                                                     |
| 7 | 23636659 | 23636859 | KD2-H4K8ac_peak_26040 | 11.05155 | CCDC126_ENSG00000169193                             |
| 7 | 23637075 | 23637524 | KD2-H4K8ac_peak_26041 | 8.18084  | CCDC126_ENSG00000169193                             |
| 7 | 23719829 | 23720435 | KD2-H4K8ac_peak_26042 | 12.08081 | FAM221A_ENSG00000188732;AC006026.13_ENSG00000234286 |
| 7 | 23932691 | 23933162 | KD2-H4K8ac_peak_26043 | 6.40297  |                                                     |
| 7 | 23933577 | 23934631 | KD2-H4K8ac_peak_26044 | 8.58725  | snoU13_ENSG00000238849                              |
| 7 | 23935227 | 23935447 | KD2-H4K8ac_peak_26045 | 6.65673  | snoU13_ENSG00000238849                              |
| 7 | 23964895 | 23965119 | KD2-H4K8ac_peak_26046 | 4.42765  |                                                     |
| 7 | 23965331 | 23965635 | KD2-H4K8ac_peak_26047 | 6.22239  |                                                     |
| 7 | 23965832 | 23966087 | KD2-H4K8ac_peak_26048 | 14.93459 |                                                     |
| 7 | 23966825 | 23968096 | KD2-H4K8ac_peak_26049 | 10.08707 |                                                     |
| 7 | 23968815 | 23969869 | KD2-H4K8ac_peak_26050 | 7.95563  |                                                     |
| 7 | 23971362 | 23971653 | KD2-H4K8ac_peak_26051 | 9.36516  |                                                     |
| 7 | 23978809 | 23979103 | KD2-H4K8ac_peak_26052 | 6.92624  |                                                     |
| 7 | 24090339 | 24090623 | KD2-H4K8ac_peak_26053 | 8.09472  |                                                     |
| 7 | 24181619 | 24182294 | KD2-H4K8ac_peak_26054 | 4.67342  |                                                     |
| 7 | 24238695 | 24239568 | KD2-H4K8ac_peak_26055 | 10.27185 |                                                     |
| 7 | 24240053 | 24240784 | KD2-H4K8ac_peak_26056 | 8.85813  |                                                     |
| 7 | 24244466 | 24244719 | KD2-H4K8ac_peak_26057 | 5.82799  |                                                     |
| 7 | 24250716 | 24250917 | KD2-H4K8ac_peak_26058 | 5.88845  |                                                     |
| 7 | 24251327 | 24251524 | KD2-H4K8ac_peak_26059 | 6.35295  |                                                     |
| 7 | 24252538 | 24253677 | KD2-H4K8ac_peak_26060 | 14.17488 |                                                     |
| 7 | 24255094 | 24255294 | KD2-H4K8ac_peak_26061 | 8.5092   |                                                     |
| 7 | 24255525 | 24256628 | KD2-H4K8ac_peak_26062 | 16.71655 |                                                     |
| 7 | 24257158 | 24257608 | KD2-H4K8ac_peak_26063 | 10.19949 |                                                     |
| 7 | 24266460 | 24266675 | KD2-H4K8ac_peak_26064 | 9.29151  |                                                     |
| 7 | 24267429 | 24268484 | KD2-H4K8ac_peak_26065 | 8.86099  |                                                     |
| 7 | 24323503 | 24324221 | KD2-H4K8ac_peak_26066 | 10.44656 | NPY_ENSG00000122585                                 |
| 7 | 24383018 | 24383231 | KD2-H4K8ac_peak_26067 | 3.91903  |                                                     |
| 7 | 24385857 | 24386295 | KD2-H4K8ac_peak_26068 | 12.25441 |                                                     |
| 7 | 24588609 | 24588869 | KD2-H4K8ac_peak_26069 | 9.43685  |                                                     |
| 7 | 24796178 | 24797493 | KD2-H4K8ac_peak_26070 | 9.44322  |                                                     |
| 7 | 24961903 | 24962241 | KD2-H4K8ac_peak_26071 | 4.70206  |                                                     |
| 7 | 24962839 | 24963507 | KD2-H4K8ac_peak_26072 | 11.28831 |                                                     |
| 7 | 25010632 | 25010827 | KD2-H4K8ac_peak_26073 | 5.18553  |                                                     |
| 7 | 25019293 | 25019686 | KD2-H4K8ac_peak_26074 | 7.38799  |                                                     |
| 7 | 25020050 | 25020542 | KD2-H4K8ac_peak_26075 | 7.11824  | OSBPL3_ENSG00000070882                              |
| 7 | 25020869 | 25021091 | KD2-H4K8ac_peak_26076 | 13.70605 | OSBPL3_ENSG00000070882                              |
| 7 | 25137722 | 25137966 | KD2-H4K8ac_peak_26077 | 6.67538  |                                                     |
| 7 | 25165249 | 25165541 | KD2-H4K8ac_peak_26078 | 9.56573  | CYCS_ENSG00000172115                                |
| 7 | 25219417 | 25220820 | KD2-H4K8ac_peak_26079 | 20.30085 | C7orf31_ENSG00000153790                             |
| 7 | 25534946 | 25535151 | KD2-H4K8ac_peak_26080 | 6.76298  |                                                     |

|   |          |          |                       |          |                                                                            |
|---|----------|----------|-----------------------|----------|----------------------------------------------------------------------------|
| 7 | 25584786 | 25585135 | KD2-H4K8ac_peak_26081 | 6.66692  |                                                                            |
| 7 | 25891799 | 25892465 | KD2-H4K8ac_peak_26082 | 13.59098 |                                                                            |
| 7 | 25896986 | 25897253 | KD2-H4K8ac_peak_26083 | 7.51054  |                                                                            |
| 7 | 25934531 | 25934986 | KD2-H4K8ac_peak_26084 | 19.98162 |                                                                            |
| 7 | 25990488 | 25990795 | KD2-H4K8ac_peak_26085 | 9.1707   | MIR148A_ENSG00000199085                                                    |
| 7 | 25991076 | 25991369 | KD2-H4K8ac_peak_26086 | 15.61313 |                                                                            |
| 7 | 26118008 | 26118279 | KD2-H4K8ac_peak_26087 | 6.56211  |                                                                            |
| 7 | 26191112 | 26191654 | KD2-H4K8ac_peak_26088 | 11.85249 | NFE2L3_ENSG00000050344                                                     |
| 7 | 26191853 | 26192672 | KD2-H4K8ac_peak_26089 | 8.18084  | NFE2L3_ENSG00000050344                                                     |
| 7 | 26227197 | 26227453 | KD2-H4K8ac_peak_26090 | 7.62364  |                                                                            |
| 7 | 26239758 | 26240329 | KD2-H4K8ac_peak_26091 | 15.19625 | HNRNPA2B1_ENSG00000122566;CBX3_ENSG00000122565                             |
| 7 | 26240681 | 26242086 | KD2-H4K8ac_peak_26092 | 19.5605  | HNRNPA2B1_ENSG00000122566;CBX3_ENSG00000122565                             |
| 7 | 26330961 | 26331955 | KD2-H4K8ac_peak_26093 | 14.15383 | SNX10_ENSG00000086300                                                      |
| 7 | 26415669 | 26416639 | KD2-H4K8ac_peak_26094 | 12.96152 | AC004540.4_ENSG00000225792                                                 |
| 7 | 26437406 | 26439085 | KD2-H4K8ac_peak_26095 | 13.70605 | AC004540.5_ENSG00000214870                                                 |
| 7 | 26439334 | 26439832 | KD2-H4K8ac_peak_26096 | 6.66692  |                                                                            |
| 7 | 26480984 | 26481388 | KD2-H4K8ac_peak_26097 | 6.28103  |                                                                            |
| 7 | 26575495 | 26575794 | KD2-H4K8ac_peak_26098 | 4.37815  |                                                                            |
| 7 | 26577888 | 26578082 | KD2-H4K8ac_peak_26099 | 5.54647  | KIAA0087_ENSG00000122548                                                   |
| 7 | 27200160 | 27200629 | KD2-H4K8ac_peak_26100 | 5.8504   |                                                                            |
| 7 | 27496896 | 27497098 | KD2-H4K8ac_peak_26101 | 5.14125  |                                                                            |
| 7 | 27702205 | 27702427 | KD2-H4K8ac_peak_26102 | 5.38581  | HIBADH_ENSG00000106049                                                     |
| 7 | 28219021 | 28219469 | KD2-H4K8ac_peak_26103 | 8.10216  | JAZF1_ENSG00000153814;JAZF1-AS1_ENSG00000234336                            |
| 7 | 28220016 | 28220224 | KD2-H4K8ac_peak_26104 | 9.28039  | JAZF1_ENSG00000153814;JAZF1-AS1_ENSG00000234336                            |
| 7 | 28613090 | 28613286 | KD2-H4K8ac_peak_26105 | 10.21366 |                                                                            |
| 7 | 28724962 | 28725158 | KD2-H4K8ac_peak_26106 | 5.64566  |                                                                            |
| 7 | 28787147 | 28787554 | KD2-H4K8ac_peak_26107 | 6.24114  |                                                                            |
| 7 | 28893372 | 28894251 | KD2-H4K8ac_peak_26108 | 13.77586 |                                                                            |
| 7 | 28995263 | 28995644 | KD2-H4K8ac_peak_26109 | 6.12046  |                                                                            |
| 7 | 28995902 | 28996291 | KD2-H4K8ac_peak_26110 | 5.38581  | AC005013.5_ENSG00000228421                                                 |
| 7 | 28996541 | 28996739 | KD2-H4K8ac_peak_26111 | 6.46573  | AC005013.5_ENSG00000228421                                                 |
| 7 | 28997101 | 28998273 | KD2-H4K8ac_peak_26112 | 13.95627 | AC005013.1_ENSG00000255690;TRIL_ENSG00000176734;AC005013.5_ENSG00000228421 |
| 7 | 29023522 | 29024064 | KD2-H4K8ac_peak_26113 | 6.83936  |                                                                            |
| 7 | 29037481 | 29037698 | KD2-H4K8ac_peak_26114 | 4.57699  |                                                                            |
| 7 | 29185818 | 29186166 | KD2-H4K8ac_peak_26115 | 9.36665  |                                                                            |
| 7 | 29234055 | 29234272 | KD2-H4K8ac_peak_26116 | 9.6589   | CPVL_ENSG00000106066                                                       |
| 7 | 29287148 | 29287607 | KD2-H4K8ac_peak_26117 | 6.76298  |                                                                            |
| 7 | 29357422 | 29357783 | KD2-H4K8ac_peak_26118 | 6.99815  |                                                                            |
| 7 | 29358537 | 29358879 | KD2-H4K8ac_peak_26119 | 9.51625  |                                                                            |
| 7 | 29724778 | 29725235 | KD2-H4K8ac_peak_26120 | 11.80283 | ZNRF2P2_ENSG00000225264                                                    |
| 7 | 29846124 | 29846941 | KD2-H4K8ac_peak_26121 | 3.83717  | WIPF3_ENSG00000122574                                                      |
| 7 | 30028539 | 30029849 | KD2-H4K8ac_peak_26122 | 11.85249 | SCRN1_ENSG00000136193;AC007285.6_ENSG00000227014                           |
| 7 | 30068008 | 30068725 | KD2-H4K8ac_peak_26123 | 21.2844  | PLEKHA8_ENSG00000106086                                                    |
| 7 | 30175129 | 30175362 | KD2-H4K8ac_peak_26124 | 5.01002  | MTURN_ENSG00000180354                                                      |
| 7 | 30213105 | 30213453 | KD2-H4K8ac_peak_26125 | 4.33139  |                                                                            |
| 7 | 30265473 | 30266179 | KD2-H4K8ac_peak_26126 | 12.09573 |                                                                            |

|   |          |          |                       |          |                                                 |
|---|----------|----------|-----------------------|----------|-------------------------------------------------|
| 7 | 30324394 | 30325096 | KD2-H4K8ac_peak_26127 | 12.30509 | ZNRF2_ENSG00000180233                           |
| 7 | 30500058 | 30500451 | KD2-H4K8ac_peak_26128 | 9.06369  |                                                 |
| 7 | 30509349 | 30509558 | KD2-H4K8ac_peak_26129 | 6.99815  |                                                 |
| 7 | 30517793 | 30518729 | KD2-H4K8ac_peak_26130 | 13.70661 | NOD1_ENSG00000106100                            |
| 7 | 30544049 | 30544263 | KD2-H4K8ac_peak_26131 | 5.4779   |                                                 |
| 7 | 30544774 | 30545097 | KD2-H4K8ac_peak_26132 | 8.21852  |                                                 |
| 7 | 30634541 | 30635014 | KD2-H4K8ac_peak_26133 | 8.63033  | AC005154.6_ENSG00000196295;GARS_ENSG00000106105 |
| 7 | 30766202 | 30766404 | KD2-H4K8ac_peak_26134 | 5.32933  |                                                 |
| 7 | 30779975 | 30780189 | KD2-H4K8ac_peak_26135 | 6.60096  |                                                 |
| 7 | 30794854 | 30795273 | KD2-H4K8ac_peak_26136 | 8.58725  |                                                 |
| 7 | 30796871 | 30797565 | KD2-H4K8ac_peak_26137 | 10.19949 |                                                 |
| 7 | 30797784 | 30798132 | KD2-H4K8ac_peak_26138 | 12.23    |                                                 |
| 7 | 30810480 | 30811539 | KD2-H4K8ac_peak_26139 | 14.39182 | FAM188B_ENSG00000106125                         |
| 7 | 30925560 | 30926149 | KD2-H4K8ac_peak_26140 | 7.76104  |                                                 |
| 7 | 30926692 | 30927303 | KD2-H4K8ac_peak_26141 | 12.70959 |                                                 |
| 7 | 30950582 | 30950948 | KD2-H4K8ac_peak_26142 | 4.54006  |                                                 |
| 7 | 30951447 | 30951743 | KD2-H4K8ac_peak_26143 | 6.40297  |                                                 |
| 7 | 30953359 | 30953777 | KD2-H4K8ac_peak_26144 | 7.18615  |                                                 |
| 7 | 30978115 | 30978527 | KD2-H4K8ac_peak_26145 | 19.25648 | GHRHR_ENSG00000106128                           |
| 7 | 31067221 | 31067539 | KD2-H4K8ac_peak_26146 | 4.06758  |                                                 |
| 7 | 31067775 | 31068089 | KD2-H4K8ac_peak_26147 | 7.40373  |                                                 |
| 7 | 31068617 | 31068834 | KD2-H4K8ac_peak_26148 | 4.01887  |                                                 |
| 7 | 31082556 | 31082829 | KD2-H4K8ac_peak_26149 | 4.70564  |                                                 |
| 7 | 31088022 | 31088383 | KD2-H4K8ac_peak_26150 | 9.18237  |                                                 |
| 7 | 31088652 | 31088894 | KD2-H4K8ac_peak_26151 | 3.86308  |                                                 |
| 7 | 31089251 | 31089845 | KD2-H4K8ac_peak_26152 | 12.66412 |                                                 |
| 7 | 31091588 | 31092658 | KD2-H4K8ac_peak_26153 | 11.08187 | ADCYAP1R1_ENSG00000078549                       |
| 7 | 31092948 | 31093254 | KD2-H4K8ac_peak_26154 | 4.01887  | ADCYAP1R1_ENSG00000078549                       |
| 7 | 32529613 | 32529947 | KD2-H4K8ac_peak_26155 | 6.84261  |                                                 |
| 7 | 32530655 | 32530996 | KD2-H4K8ac_peak_26156 | 15.66774 |                                                 |
| 7 | 32535093 | 32535491 | KD2-H4K8ac_peak_26157 | 16.67374 | LSM5_ENSG00000106355;AVL9_ENSG00000105778       |
| 7 | 32767665 | 32768297 | KD2-H4K8ac_peak_26158 | 11.86355 | ZNRF2P1_ENSG00000237004                         |
| 7 | 32768512 | 32768720 | KD2-H4K8ac_peak_26159 | 6.85193  | ZNRF2P1_ENSG00000237004                         |
| 7 | 32930833 | 32931415 | KD2-H4K8ac_peak_26160 | 19.88671 |                                                 |
| 7 | 32931872 | 32932482 | KD2-H4K8ac_peak_26161 | 22.59644 |                                                 |
| 7 | 32982210 | 32982747 | KD2-H4K8ac_peak_26162 | 12.88702 | RP9P_ENSG00000205763                            |
| 7 | 32996177 | 32997620 | KD2-H4K8ac_peak_26163 | 33.81557 | FKBP9_ENSG00000122642                           |
| 7 | 32997826 | 32998262 | KD2-H4K8ac_peak_26164 | 8.55271  | FKBP9_ENSG00000122642                           |
| 7 | 33101968 | 33102273 | KD2-H4K8ac_peak_26165 | 7.73264  | NT5C3A_ENSG00000122643                          |
| 7 | 33102549 | 33103116 | KD2-H4K8ac_peak_26166 | 13.27022 | NT5C3A_ENSG00000122643                          |
| 7 | 33148449 | 33148993 | KD2-H4K8ac_peak_26167 | 18.54875 | RP9_ENSG00000164610                             |
| 7 | 33149302 | 33149497 | KD2-H4K8ac_peak_26168 | 3.75035  | RP9_ENSG00000164610                             |
| 7 | 33168541 | 33169622 | KD2-H4K8ac_peak_26169 | 9.63487  | AC074338.5_ENSG00000228015;BBS9_ENSG00000122507 |
| 7 | 33650029 | 33650276 | KD2-H4K8ac_peak_26170 | 5.34946  |                                                 |
| 7 | 33832064 | 33832291 | KD2-H4K8ac_peak_26171 | 5.88845  |                                                 |
| 7 | 35076228 | 35077008 | KD2-H4K8ac_peak_26172 | 11.2938  | DPY19L1_ENSG00000173852                         |

|   |          |          |                       |          |                                                       |
|---|----------|----------|-----------------------|----------|-------------------------------------------------------|
| 7 | 35077407 | 35077918 | KD2-H4K8ac_peak_26173 | 16.57619 | DPY19L1_ENSG00000173852                               |
| 7 | 35225799 | 35226260 | KD2-H4K8ac_peak_26174 | 14.99434 | DPY19L2P1_ENSG00000189212                             |
| 7 | 35293425 | 35294556 | KD2-H4K8ac_peak_26175 | 11.05155 | TBX20_ENSG00000164532                                 |
| 7 | 35394498 | 35394728 | KD2-H4K8ac_peak_26176 | 5.96361  |                                                       |
| 7 | 35505338 | 35505638 | KD2-H4K8ac_peak_26177 | 18.86697 |                                                       |
| 7 | 35506058 | 35506653 | KD2-H4K8ac_peak_26178 | 8.2413   |                                                       |
| 7 | 35734268 | 35734631 | KD2-H4K8ac_peak_26179 | 12.26437 | HERPUD2_ENSG00000122557;RP11-379H18.1_ENSG00000271122 |
| 7 | 35734871 | 35735139 | KD2-H4K8ac_peak_26180 | 11.3923  | HERPUD2_ENSG00000122557;RP11-379H18.1_ENSG00000271122 |
| 7 | 35839840 | 35840217 | KD2-H4K8ac_peak_26181 | 7.73264  | AC007551.3_ENSG00000228878;SEPT7_ENSG00000122545      |
| 7 | 35840861 | 35841369 | KD2-H4K8ac_peak_26182 | 10.29842 | AC007551.3_ENSG00000228878;SEPT7_ENSG00000122545      |
| 7 | 36191962 | 36192297 | KD2-H4K8ac_peak_26183 | 6.76298  | EEDP1_ENSG00000122547                                 |
| 7 | 36246957 | 36247223 | KD2-H4K8ac_peak_26184 | 3.97079  |                                                       |
| 7 | 36247796 | 36248289 | KD2-H4K8ac_peak_26185 | 7.20567  |                                                       |
| 7 | 36254544 | 36255620 | KD2-H4K8ac_peak_26186 | 10.73392 |                                                       |
| 7 | 36297796 | 36298763 | KD2-H4K8ac_peak_26187 | 11.00004 |                                                       |
| 7 | 36343387 | 36343613 | KD2-H4K8ac_peak_26188 | 8.48031  |                                                       |
| 7 | 36406379 | 36406760 | KD2-H4K8ac_peak_26189 | 16.25886 |                                                       |
| 7 | 36407190 | 36407482 | KD2-H4K8ac_peak_26190 | 4.52514  |                                                       |
| 7 | 36428659 | 36429204 | KD2-H4K8ac_peak_26191 | 17.75427 | KIAA0895_ENSG00000164542;ANLN_ENSG00000011426         |
| 7 | 36429459 | 36430084 | KD2-H4K8ac_peak_26192 | 8.80432  | KIAA0895_ENSG00000164542;ANLN_ENSG00000011426         |
| 7 | 36554337 | 36554602 | KD2-H4K8ac_peak_26193 | 6.66692  |                                                       |
| 7 | 36729602 | 36729996 | KD2-H4K8ac_peak_26194 | 6.19483  |                                                       |
| 7 | 36909603 | 36910118 | KD2-H4K8ac_peak_26195 | 8.39745  |                                                       |
| 7 | 36943684 | 36943878 | KD2-H4K8ac_peak_26196 | 8.34752  |                                                       |
| 7 | 37004492 | 37004799 | KD2-H4K8ac_peak_26197 | 4.77079  |                                                       |
| 7 | 37006780 | 37007014 | KD2-H4K8ac_peak_26198 | 6.30229  |                                                       |
| 7 | 37116819 | 37117015 | KD2-H4K8ac_peak_26199 | 6.85193  |                                                       |
| 7 | 37323084 | 37323715 | KD2-H4K8ac_peak_26200 | 8.26945  |                                                       |
| 7 | 37327590 | 37328020 | KD2-H4K8ac_peak_26201 | 4.20044  |                                                       |
| 7 | 37331029 | 37331301 | KD2-H4K8ac_peak_26202 | 5.88845  |                                                       |
| 7 | 37365825 | 37366064 | KD2-H4K8ac_peak_26203 | 8.30974  |                                                       |
| 7 | 37369148 | 37369572 | KD2-H4K8ac_peak_26204 | 10.19723 |                                                       |
| 7 | 37371337 | 37371707 | KD2-H4K8ac_peak_26205 | 6.60096  |                                                       |
| 7 | 37371954 | 37372197 | KD2-H4K8ac_peak_26206 | 5.72327  |                                                       |
| 7 | 37385195 | 37385404 | KD2-H4K8ac_peak_26207 | 4.52514  |                                                       |
| 7 | 37399276 | 37399575 | KD2-H4K8ac_peak_26208 | 5.18553  |                                                       |
| 7 | 37412838 | 37413192 | KD2-H4K8ac_peak_26209 | 9.65086  |                                                       |
| 7 | 37487454 | 37488480 | KD2-H4K8ac_peak_26210 | 20.5798  | ELMO1_ENSG00000155849                                 |
| 7 | 37750665 | 37750941 | KD2-H4K8ac_peak_26211 | 7.48133  |                                                       |
| 7 | 37956202 | 37956520 | KD2-H4K8ac_peak_26212 | 5.75757  |                                                       |
| 7 | 37960312 | 37961131 | KD2-H4K8ac_peak_26213 | 20.18584 |                                                       |
| 7 | 38217370 | 38217633 | KD2-H4K8ac_peak_26214 | 19.66144 | STARD3NL_ENSG00000010270                              |
| 7 | 38218008 | 38218414 | KD2-H4K8ac_peak_26215 | 13.70753 | STARD3NL_ENSG00000010270                              |
| 7 | 38948407 | 38948659 | KD2-H4K8ac_peak_26216 | 15.13261 |                                                       |
| 7 | 39605734 | 39606473 | KD2-H4K8ac_peak_26217 | 16.49944 | AC011290.4_ENSG00000227172;YAE1D1_ENSG00000241127     |
| 7 | 39649303 | 39649554 | KD2-H4K8ac_peak_26218 | 8.76725  | AC004837.4_ENSG00000231951;AC004837.3_ENSG00000106540 |

|   |          |          |                       |          |                                                    |
|---|----------|----------|-----------------------|----------|----------------------------------------------------|
| 7 | 39662554 | 39663753 | KD2-H4K8ac_peak_26219 | 19.39602 | RALA_ENSG00000006451                               |
| 7 | 39772311 | 39772782 | KD2-H4K8ac_peak_26220 | 4.56792  | LINC00265_ENSG00000188185                          |
| 7 | 39773235 | 39773429 | KD2-H4K8ac_peak_26221 | 3.82395  | LINC00265_ENSG00000188185                          |
| 7 | 39851476 | 39851742 | KD2-H4K8ac_peak_26222 | 5.88845  |                                                    |
| 7 | 39988030 | 39988244 | KD2-H4K8ac_peak_26223 | 9.36516  |                                                    |
| 7 | 39988541 | 39989012 | KD2-H4K8ac_peak_26224 | 8.36432  | RP11-467D6.1_ENSG00000259826;CDK13_ENSG00000065883 |
| 7 | 39989437 | 39990423 | KD2-H4K8ac_peak_26225 | 13.70753 | RP11-467D6.1_ENSG00000259826;CDK13_ENSG00000065883 |
| 7 | 40173827 | 40175072 | KD2-H4K8ac_peak_26226 | 7.73264  | SUGCT_ENSG00000175600;MPLKIP_ENSG00000168303       |
| 7 | 40566081 | 40566280 | KD2-H4K8ac_peak_26227 | 6.65673  |                                                    |
| 7 | 40566879 | 40567143 | KD2-H4K8ac_peak_26228 | 10.65724 |                                                    |
| 7 | 40568892 | 40569179 | KD2-H4K8ac_peak_26229 | 4.52514  |                                                    |
| 7 | 40581687 | 40582315 | KD2-H4K8ac_peak_26230 | 6.90231  |                                                    |
| 7 | 40583837 | 40584184 | KD2-H4K8ac_peak_26231 | 8.4716   |                                                    |
| 7 | 40586298 | 40586529 | KD2-H4K8ac_peak_26232 | 4.54006  | AC004988.1_ENSG00000203446                         |
| 7 | 40590377 | 40590705 | KD2-H4K8ac_peak_26233 | 7.92775  |                                                    |
| 7 | 40593333 | 40593734 | KD2-H4K8ac_peak_26234 | 10.76049 |                                                    |
| 7 | 40660026 | 40660261 | KD2-H4K8ac_peak_26235 | 8.52559  |                                                    |
| 7 | 40683970 | 40684174 | KD2-H4K8ac_peak_26236 | 3.90565  |                                                    |
| 7 | 40684397 | 40685023 | KD2-H4K8ac_peak_26237 | 11.24702 |                                                    |
| 7 | 40750806 | 40751016 | KD2-H4K8ac_peak_26238 | 4.06758  |                                                    |
| 7 | 40754924 | 40755528 | KD2-H4K8ac_peak_26239 | 6.55628  |                                                    |
| 7 | 40759268 | 40759657 | KD2-H4K8ac_peak_26240 | 7.0754   |                                                    |
| 7 | 40760273 | 40760776 | KD2-H4K8ac_peak_26241 | 4.67342  |                                                    |
| 7 | 40866962 | 40867273 | KD2-H4K8ac_peak_26242 | 6.99815  |                                                    |
| 7 | 41477853 | 41478243 | KD2-H4K8ac_peak_26243 | 5.54647  |                                                    |
| 7 | 41478846 | 41479227 | KD2-H4K8ac_peak_26244 | 9.51625  |                                                    |
| 7 | 41674687 | 41674887 | KD2-H4K8ac_peak_26245 | 5.15777  |                                                    |
| 7 | 41744403 | 41744761 | KD2-H4K8ac_peak_26246 | 7.49599  | AC005027.3_ENSG00000236310                         |
| 7 | 42928024 | 42928503 | KD2-H4K8ac_peak_26247 | 12.36441 |                                                    |
| 7 | 42950707 | 42951475 | KD2-H4K8ac_peak_26248 | 16.56091 | C7orf25_ENSG00000136197                            |
| 7 | 42951808 | 42952001 | KD2-H4K8ac_peak_26249 | 9.4622   | C7orf25_ENSG00000136197                            |
| 7 | 42952449 | 42952690 | KD2-H4K8ac_peak_26250 | 8.52881  | C7orf25_ENSG00000136197                            |
| 7 | 43401898 | 43402279 | KD2-H4K8ac_peak_26251 | 6.40683  |                                                    |
| 7 | 43560568 | 43560851 | KD2-H4K8ac_peak_26252 | 5.88845  |                                                    |
| 7 | 43570811 | 43571220 | KD2-H4K8ac_peak_26253 | 10.17341 |                                                    |
| 7 | 43571820 | 43572928 | KD2-H4K8ac_peak_26254 | 13.11898 |                                                    |
| 7 | 43573268 | 43573541 | KD2-H4K8ac_peak_26255 | 9.40886  |                                                    |
| 7 | 43685683 | 43686450 | KD2-H4K8ac_peak_26256 | 9.20193  |                                                    |
| 7 | 43687041 | 43687586 | KD2-H4K8ac_peak_26257 | 13.12288 |                                                    |
| 7 | 43768636 | 43769558 | KD2-H4K8ac_peak_26258 | 9.95119  | COA1_ENSG00000106603                               |
| 7 | 43797694 | 43798879 | KD2-H4K8ac_peak_26259 | 11.02863 | BLVRA_ENSG00000106605                              |
| 7 | 43908552 | 43909043 | KD2-H4K8ac_peak_26260 | 6.85193  | MRPS24_ENSG00000062582                             |
| 7 | 43945807 | 43946694 | KD2-H4K8ac_peak_26261 | 29.92854 | URGCP-MRPS24_ENSG00000270617                       |
| 7 | 43965083 | 43965280 | KD2-H4K8ac_peak_26262 | 6.25869  | URGCP_ENSG00000106608;UBE2D4_ENSG00000078967       |
| 7 | 43965675 | 43966595 | KD2-H4K8ac_peak_26263 | 19.42408 | URGCP_ENSG00000106608;UBE2D4_ENSG00000078967       |
| 7 | 43976436 | 43976920 | KD2-H4K8ac_peak_26264 | 9.36516  |                                                    |

|   |          |          |                       |          |                                                                               |
|---|----------|----------|-----------------------|----------|-------------------------------------------------------------------------------|
| 7 | 43977403 | 43978210 | KD2-H4K8ac_peak_26265 | 11.28831 |                                                                               |
| 7 | 43978826 | 43979113 | KD2-H4K8ac_peak_26266 | 9.41619  |                                                                               |
| 7 | 44018209 | 44018519 | KD2-H4K8ac_peak_26267 | 8.10216  |                                                                               |
| 7 | 44059070 | 44059683 | KD2-H4K8ac_peak_26268 | 14.48922 | POLR2J4_ENSG00000214783;RP5-1165K10.2_ENSG00000273432;POLR2J4_ENSG00000272655 |
| 7 | 44060074 | 44060274 | KD2-H4K8ac_peak_26269 | 6.58902  |                                                                               |
| 7 | 44084336 | 44084824 | KD2-H4K8ac_peak_26270 | 15.12324 | DBNL_ENSG00000136279                                                          |
| 7 | 44104843 | 44105420 | KD2-H4K8ac_peak_26271 | 11.28831 | AC017116.11_ENSG00000239775;PGAM2_ENSG00000164708                             |
| 7 | 44107448 | 44107800 | KD2-H4K8ac_peak_26272 | 4.72028  |                                                                               |
| 7 | 44121738 | 44121954 | KD2-H4K8ac_peak_26273 | 7.74292  | POLM_ENSG00000122678                                                          |
| 7 | 44127121 | 44128354 | KD2-H4K8ac_peak_26274 | 12.57865 |                                                                               |
| 7 | 44143290 | 44144570 | KD2-H4K8ac_peak_26275 | 15.82743 | AEBP1_ENSG00000106624                                                         |
| 7 | 44162899 | 44163099 | KD2-H4K8ac_peak_26276 | 12.30509 | POLD2_ENSG00000106628                                                         |
| 7 | 44185226 | 44185616 | KD2-H4K8ac_peak_26277 | 5.01002  |                                                                               |
| 7 | 44186101 | 44186354 | KD2-H4K8ac_peak_26278 | 5.75748  |                                                                               |
| 7 | 44217358 | 44217550 | KD2-H4K8ac_peak_26279 | 3.75035  |                                                                               |
| 7 | 44255700 | 44256043 | KD2-H4K8ac_peak_26280 | 5.48272  |                                                                               |
| 7 | 44257446 | 44258060 | KD2-H4K8ac_peak_26281 | 15.69679 |                                                                               |
| 7 | 44258332 | 44258833 | KD2-H4K8ac_peak_26282 | 17.22916 |                                                                               |
| 7 | 44274417 | 44275961 | KD2-H4K8ac_peak_26283 | 18.3193  |                                                                               |
| 7 | 44276186 | 44276791 | KD2-H4K8ac_peak_26284 | 11.40698 |                                                                               |
| 7 | 44280928 | 44281136 | KD2-H4K8ac_peak_26285 | 5.38581  |                                                                               |
| 7 | 44297173 | 44297654 | KD2-H4K8ac_peak_26286 | 6.60375  |                                                                               |
| 7 | 44315312 | 44316650 | KD2-H4K8ac_peak_26287 | 15.50901 |                                                                               |
| 7 | 44333744 | 44334030 | KD2-H4K8ac_peak_26288 | 7.86151  |                                                                               |
| 7 | 44360455 | 44360743 | KD2-H4K8ac_peak_26289 | 7.76104  |                                                                               |
| 7 | 44529706 | 44530041 | KD2-H4K8ac_peak_26290 | 5.19622  | NUDCD3_ENSG00000015676                                                        |
| 7 | 44530243 | 44530501 | KD2-H4K8ac_peak_26291 | 14.69327 | NUDCD3_ENSG00000015676                                                        |
| 7 | 44612951 | 44613464 | KD2-H4K8ac_peak_26292 | 14.43794 |                                                                               |
| 7 | 44613686 | 44614038 | KD2-H4K8ac_peak_26293 | 16.822   | DDX56_ENSG00000136271                                                         |
| 7 | 44621210 | 44621784 | KD2-H4K8ac_peak_26294 | 16.67374 | TMED4_ENSG00000158604                                                         |
| 7 | 44622120 | 44622762 | KD2-H4K8ac_peak_26295 | 7.49599  | TMED4_ENSG00000158604                                                         |
| 7 | 44646189 | 44647119 | KD2-H4K8ac_peak_26296 | 14.80472 | OGDH_ENSG00000105953                                                          |
| 7 | 44678611 | 44678831 | KD2-H4K8ac_peak_26297 | 8.30974  |                                                                               |
| 7 | 44788141 | 44789024 | KD2-H4K8ac_peak_26298 | 20.5798  | ZMIZ2_ENSG00000122515                                                         |
| 7 | 44808455 | 44808926 | KD2-H4K8ac_peak_26299 | 9.08816  |                                                                               |
| 7 | 44835506 | 44835961 | KD2-H4K8ac_peak_26300 | 12.37731 | PPIA_ENSG00000196262                                                          |
| 7 | 44836362 | 44837025 | KD2-H4K8ac_peak_26301 | 19.67275 | PPIA_ENSG00000196262                                                          |
| 7 | 44887354 | 44887662 | KD2-H4K8ac_peak_26302 | 11.00372 | H2AFV_ENSG00000105968;AC004854.4_ENSG00000234183                              |
| 7 | 44888111 | 44888841 | KD2-H4K8ac_peak_26303 | 7.76329  | H2AFV_ENSG00000105968;AC004854.4_ENSG00000234183                              |
| 7 | 44896529 | 44896903 | KD2-H4K8ac_peak_26304 | 6.25014  |                                                                               |
| 7 | 44924446 | 44925033 | KD2-H4K8ac_peak_26305 | 12.82393 | PURB_ENSG00000146676;RP4-673M15.1_ENSG00000272768                             |
| 7 | 44925269 | 44925837 | KD2-H4K8ac_peak_26306 | 16.57619 | PURB_ENSG00000146676;RP4-673M15.1_ENSG00000272768                             |
| 7 | 45025871 | 45026207 | KD2-H4K8ac_peak_26307 | 13.77586 | SNHG15_ENSG00000232956                                                        |
| 7 | 45026502 | 45027111 | KD2-H4K8ac_peak_26308 | 6.94249  | SNHG15_ENSG00000232956                                                        |
| 7 | 45038415 | 45038711 | KD2-H4K8ac_peak_26309 | 4.211    | CCM2_ENSG00000136280                                                          |
| 7 | 45112607 | 45112824 | KD2-H4K8ac_peak_26310 | 3.82395  |                                                                               |



|   |          |          |                       |          |                         |
|---|----------|----------|-----------------------|----------|-------------------------|
| 7 | 45113027 | 45113386 | KD2-H4K8ac_peak_26311 | 5.83732  |                         |
| 7 | 45127547 | 45129040 | KD2-H4K8ac_peak_26312 | 11.82518 | NACAD_ENSG00000136274   |
| 7 | 45151002 | 45151215 | KD2-H4K8ac_peak_26313 | 4.27127  | TBRG4_ENSG00000136270   |
| 7 | 45151467 | 45151670 | KD2-H4K8ac_peak_26314 | 11.97691 | TBRG4_ENSG00000136270   |
| 7 | 45163280 | 45163517 | KD2-H4K8ac_peak_26315 | 5.96443  |                         |
| 7 | 45258941 | 45259133 | KD2-H4K8ac_peak_26316 | 9.36516  |                         |
| 7 | 45259533 | 45259858 | KD2-H4K8ac_peak_26317 | 5.08628  |                         |
| 7 | 45332072 | 45332670 | KD2-H4K8ac_peak_26318 | 8.42997  |                         |
| 7 | 45386253 | 45386719 | KD2-H4K8ac_peak_26319 | 9.402    |                         |
| 7 | 45388199 | 45388626 | KD2-H4K8ac_peak_26320 | 6.62457  |                         |
| 7 | 45534311 | 45534635 | KD2-H4K8ac_peak_26321 | 6.03202  |                         |
| 7 | 45613290 | 45613924 | KD2-H4K8ac_peak_26322 | 10.35678 | ADCY1_ENSG00000164742   |
| 7 | 45614360 | 45614613 | KD2-H4K8ac_peak_26323 | 5.94405  | ADCY1_ENSG00000164742   |
| 7 | 45619743 | 45620023 | KD2-H4K8ac_peak_26324 | 5.4779   |                         |
| 7 | 45808111 | 45808497 | KD2-H4K8ac_peak_26325 | 9.048    | SEPT7P2_ENSG00000214765 |
| 7 | 45808832 | 45809844 | KD2-H4K8ac_peak_26326 | 7.76104  | SEPT7P2_ENSG00000214765 |
| 7 | 46082604 | 46083177 | KD2-H4K8ac_peak_26327 | 9.05418  |                         |
| 7 | 47293580 | 47294333 | KD2-H4K8ac_peak_26328 | 11.61757 |                         |
| 7 | 47367437 | 47367691 | KD2-H4K8ac_peak_26329 | 8.86099  |                         |
| 7 | 47467698 | 47467915 | KD2-H4K8ac_peak_26330 | 13.80019 |                         |
| 7 | 47468478 | 47469042 | KD2-H4K8ac_peak_26331 | 3.97079  |                         |
| 7 | 47493517 | 47493753 | KD2-H4K8ac_peak_26332 | 5.07168  |                         |
| 7 | 47530115 | 47530373 | KD2-H4K8ac_peak_26333 | 6.24114  |                         |
| 7 | 47534824 | 47535155 | KD2-H4K8ac_peak_26334 | 8.10216  |                         |
| 7 | 47536285 | 47536528 | KD2-H4K8ac_peak_26335 | 7.28628  |                         |
| 7 | 47537575 | 47538016 | KD2-H4K8ac_peak_26336 | 9.84999  |                         |
| 7 | 47575964 | 47577410 | KD2-H4K8ac_peak_26337 | 9.95119  |                         |
| 7 | 47607708 | 47607917 | KD2-H4K8ac_peak_26338 | 5.75757  |                         |
| 7 | 47610834 | 47611030 | KD2-H4K8ac_peak_26339 | 6.20982  |                         |
| 7 | 47611517 | 47611716 | KD2-H4K8ac_peak_26340 | 6.20982  |                         |
| 7 | 47615531 | 47615837 | KD2-H4K8ac_peak_26341 | 5.62563  |                         |
| 7 | 47621133 | 47622088 | KD2-H4K8ac_peak_26342 | 12.57865 | TNS3_ENSG00000136205    |
| 7 | 47675604 | 47675873 | KD2-H4K8ac_peak_26343 | 5.75757  |                         |
| 7 | 47676311 | 47676797 | KD2-H4K8ac_peak_26344 | 6.97408  |                         |
| 7 | 47677005 | 47677204 | KD2-H4K8ac_peak_26345 | 6.13909  |                         |
| 7 | 47679722 | 47680113 | KD2-H4K8ac_peak_26346 | 5.25269  |                         |
| 7 | 47749080 | 47749514 | KD2-H4K8ac_peak_26347 | 13.36684 |                         |
| 7 | 47757444 | 47757649 | KD2-H4K8ac_peak_26348 | 5.89562  |                         |
| 7 | 47759037 | 47759280 | KD2-H4K8ac_peak_26349 | 5.87295  |                         |
| 7 | 47760484 | 47761464 | KD2-H4K8ac_peak_26350 | 14.07846 |                         |
| 7 | 47761755 | 47762003 | KD2-H4K8ac_peak_26351 | 7.0754   |                         |
| 7 | 47763908 | 47764209 | KD2-H4K8ac_peak_26352 | 13.12288 |                         |
| 7 | 47764685 | 47765371 | KD2-H4K8ac_peak_26353 | 7.07117  |                         |
| 7 | 47765639 | 47765958 | KD2-H4K8ac_peak_26354 | 11.56469 |                         |
| 7 | 47766547 | 47767221 | KD2-H4K8ac_peak_26355 | 7.49599  |                         |
| 7 | 47776056 | 47776278 | KD2-H4K8ac_peak_26356 | 5.61069  |                         |

|   |          |          |                       |          |                                                      |
|---|----------|----------|-----------------------|----------|------------------------------------------------------|
| 7 | 47783846 | 47784436 | KD2-H4K8ac_peak_26357 | 10.96455 |                                                      |
| 7 | 47786238 | 47786497 | KD2-H4K8ac_peak_26358 | 4.52514  |                                                      |
| 7 | 47798029 | 47798567 | KD2-H4K8ac_peak_26359 | 5.59859  |                                                      |
| 7 | 47799442 | 47799725 | KD2-H4K8ac_peak_26360 | 6.05809  |                                                      |
| 7 | 47801665 | 47802097 | KD2-H4K8ac_peak_26361 | 8.82006  | LINC00525_ENSG00000146666                            |
| 7 | 47802295 | 47802724 | KD2-H4K8ac_peak_26362 | 23.28866 |                                                      |
| 7 | 47855553 | 47855780 | KD2-H4K8ac_peak_26363 | 8.9674   |                                                      |
| 7 | 47982228 | 47982626 | KD2-H4K8ac_peak_26364 | 9.8795   |                                                      |
| 7 | 47983525 | 47983721 | KD2-H4K8ac_peak_26365 | 5.01002  |                                                      |
| 7 | 48019012 | 48019477 | KD2-H4K8ac_peak_26366 | 12.79505 | HUS1_ENSG00000136273                                 |
| 7 | 48029586 | 48029894 | KD2-H4K8ac_peak_26367 | 6.56211  |                                                      |
| 7 | 48128995 | 48129419 | KD2-H4K8ac_peak_26368 | 5.72657  | UPP1_ENSG00000183696                                 |
| 7 | 50517656 | 50517990 | KD2-H4K8ac_peak_26369 | 10.76532 | FIGNL1_ENSG00000132436                               |
| 7 | 50518297 | 50518845 | KD2-H4K8ac_peak_26370 | 16.54019 | FIGNL1_ENSG00000132436                               |
| 7 | 50535416 | 50535852 | KD2-H4K8ac_peak_26371 | 8.16906  |                                                      |
| 7 | 50564070 | 50564623 | KD2-H4K8ac_peak_26372 | 19.71976 |                                                      |
| 7 | 50564951 | 50565169 | KD2-H4K8ac_peak_26373 | 4.86324  |                                                      |
| 7 | 50570126 | 50570365 | KD2-H4K8ac_peak_26374 | 5.98764  |                                                      |
| 7 | 50572460 | 50572882 | KD2-H4K8ac_peak_26375 | 6.48071  |                                                      |
| 7 | 50573393 | 50573916 | KD2-H4K8ac_peak_26376 | 10.17341 |                                                      |
| 7 | 50574212 | 50574471 | KD2-H4K8ac_peak_26377 | 5.65317  |                                                      |
| 7 | 50576142 | 50576970 | KD2-H4K8ac_peak_26378 | 10.7186  |                                                      |
| 7 | 50598742 | 50599158 | KD2-H4K8ac_peak_26379 | 4.86324  | AC018705.5_ENSG00000226122                           |
| 7 | 50599713 | 50599944 | KD2-H4K8ac_peak_26380 | 5.88845  | AC018705.5_ENSG00000226122                           |
| 7 | 50628022 | 50628722 | KD2-H4K8ac_peak_26381 | 7.36799  |                                                      |
| 7 | 51715229 | 51715487 | KD2-H4K8ac_peak_26382 | 5.54647  |                                                      |
| 7 | 52911491 | 52911812 | KD2-H4K8ac_peak_26383 | 6.66692  |                                                      |
| 7 | 54609599 | 54609792 | KD2-H4K8ac_peak_26384 | 8.04448  | VSTM2A_ENSG00000170419                               |
| 7 | 54826528 | 54826852 | KD2-H4K8ac_peak_26385 | 13.51987 | SEC61G_ENSG00000132432;RP11-745C15.2_ENSG00000234707 |
| 7 | 54827070 | 54827782 | KD2-H4K8ac_peak_26386 | 14.8083  | SEC61G_ENSG00000132432;RP11-745C15.2_ENSG00000234707 |
| 7 | 54956024 | 54956690 | KD2-H4K8ac_peak_26387 | 8.10216  |                                                      |
| 7 | 55001396 | 55001859 | KD2-H4K8ac_peak_26388 | 6.56211  | RP4-791C19.1_ENSG00000218586                         |
| 7 | 55086934 | 55087191 | KD2-H4K8ac_peak_26389 | 6.99194  | EGFR_ENSG00000146648                                 |
| 7 | 55146854 | 55147058 | KD2-H4K8ac_peak_26390 | 4.42765  |                                                      |
| 7 | 55154339 | 55154538 | KD2-H4K8ac_peak_26391 | 9.34989  |                                                      |
| 7 | 55159087 | 55159310 | KD2-H4K8ac_peak_26392 | 12.99417 |                                                      |
| 7 | 55161874 | 55162160 | KD2-H4K8ac_peak_26393 | 3.75035  |                                                      |
| 7 | 55201267 | 55201471 | KD2-H4K8ac_peak_26394 | 5.61067  |                                                      |
| 7 | 55201806 | 55202079 | KD2-H4K8ac_peak_26395 | 8.30974  |                                                      |
| 7 | 55245093 | 55245724 | KD2-H4K8ac_peak_26396 | 7.95563  |                                                      |
| 7 | 55259876 | 55260213 | KD2-H4K8ac_peak_26397 | 10.19949 |                                                      |
| 7 | 55281036 | 55281274 | KD2-H4K8ac_peak_26398 | 5.30799  |                                                      |
| 7 | 55322110 | 55323028 | KD2-H4K8ac_peak_26399 | 15.05364 |                                                      |
| 7 | 55433048 | 55434456 | KD2-H4K8ac_peak_26400 | 27.73899 | LANCL2_ENSG00000132434                               |
| 7 | 55507301 | 55507533 | KD2-H4K8ac_peak_26401 | 6.56211  |                                                      |
| 7 | 55614489 | 55614865 | KD2-H4K8ac_peak_26402 | 6.56211  |                                                      |

|   |          |          |                       |          |                                                             |
|---|----------|----------|-----------------------|----------|-------------------------------------------------------------|
| 7 | 55639438 | 55640042 | KD2-H4K8ac_peak_26403 | 13.92465 | VOPP1_ENSG00000154978;RP11-310H4.1_ENSG00000223475          |
| 7 | 55640305 | 55640756 | KD2-H4K8ac_peak_26404 | 15.66774 | VOPP1_ENSG00000154978;RP11-310H4.1_ENSG00000223475          |
| 7 | 55954570 | 55955351 | KD2-H4K8ac_peak_26405 | 19.82774 | MRPS17_ENSG00000249773;ZNF713_ENSG00000178665               |
| 7 | 56018550 | 56020045 | KD2-H4K8ac_peak_26406 | 11.92978 | GBAS_ENSG00000146729;MRPS17_ENSG00000239789                 |
| 7 | 56031639 | 56032057 | KD2-H4K8ac_peak_26407 | 7.1181   |                                                             |
| 7 | 56032303 | 56032919 | KD2-H4K8ac_peak_26408 | 16.04168 |                                                             |
| 7 | 56082302 | 56082508 | KD2-H4K8ac_peak_26409 | 4.01115  |                                                             |
| 7 | 56118831 | 56119055 | KD2-H4K8ac_peak_26410 | 6.91449  | PSPH_ENSG00000146733;CCT6A_ENSG00000146731                  |
| 7 | 56119545 | 56120037 | KD2-H4K8ac_peak_26411 | 15.2334  | PSPH_ENSG00000146733;CCT6A_ENSG00000146731                  |
| 7 | 56132033 | 56132525 | KD2-H4K8ac_peak_26412 | 13.30514 | SUMF2_ENSG00000129103                                       |
| 7 | 56151221 | 56151663 | KD2-H4K8ac_peak_26413 | 7.36799  |                                                             |
| 7 | 56606047 | 56606331 | KD2-H4K8ac_peak_26414 | 6.45018  | RP11-760D2.5_ENSG00000233288                                |
| 7 | 57829584 | 57829892 | KD2-H4K8ac_peak_26415 | 7.40314  | RP11-548K12.6_ENSG00000227015;RP11-548K12.7_ENSG00000232161 |
| 7 | 63385735 | 63386056 | KD2-H4K8ac_peak_26416 | 9.26408  | RP11-73B2.6_ENSG00000227910                                 |
| 7 | 63386275 | 63386704 | KD2-H4K8ac_peak_26417 | 14.02368 | RP11-73B2.6_ENSG00000227910;AC092634.2_ENSG00000265017      |
| 7 | 63387140 | 63387820 | KD2-H4K8ac_peak_26418 | 8.02118  | RP11-73B2.6_ENSG00000227910;AC092634.2_ENSG00000265017      |
| 7 | 63767938 | 63768386 | KD2-H4K8ac_peak_26419 | 11.55418 | ZNF736_ENSG00000234444                                      |
| 7 | 63773483 | 63773897 | KD2-H4K8ac_peak_26420 | 5.88845  |                                                             |
| 7 | 63774498 | 63774711 | KD2-H4K8ac_peak_26421 | 6.40297  |                                                             |
| 7 | 63775016 | 63775311 | KD2-H4K8ac_peak_26422 | 9.11031  |                                                             |
| 7 | 63924275 | 63924656 | KD2-H4K8ac_peak_26423 | 12.82393 |                                                             |
| 7 | 63955528 | 63955909 | KD2-H4K8ac_peak_26424 | 9.11031  |                                                             |
| 7 | 64125773 | 64126175 | KD2-H4K8ac_peak_26425 | 14.80472 | ZNF107_ENSG00000196247                                      |
| 7 | 64126544 | 64126909 | KD2-H4K8ac_peak_26426 | 18.24798 | ZNF107_ENSG00000196247                                      |
| 7 | 64253688 | 64254596 | KD2-H4K8ac_peak_26427 | 9.96941  | ZNF138_ENSG00000197008                                      |
| 7 | 64254838 | 64255204 | KD2-H4K8ac_peak_26428 | 16.49944 | ZNF138_ENSG00000197008                                      |
| 7 | 64338014 | 64338312 | KD2-H4K8ac_peak_26429 | 6.40874  |                                                             |
| 7 | 64362978 | 64363174 | KD2-H4K8ac_peak_26430 | 6.40297  |                                                             |
| 7 | 64363729 | 64364045 | KD2-H4K8ac_peak_26431 | 6.20982  |                                                             |
| 7 | 64407428 | 64408300 | KD2-H4K8ac_peak_26432 | 9.56945  |                                                             |
| 7 | 64466641 | 64467019 | KD2-H4K8ac_peak_26433 | 7.07117  | ZNF117_ENSG00000152926;ERV3-1_ENSG00000213462               |
| 7 | 64498760 | 64498987 | KD2-H4K8ac_peak_26434 | 17.42905 | CCT6P3_ENSG00000234585;RP11-460N20.3_ENSG00000239985        |
| 7 | 64699713 | 64700012 | KD2-H4K8ac_peak_26435 | 14.09426 |                                                             |
| 7 | 64700231 | 64700756 | KD2-H4K8ac_peak_26436 | 8.7577   |                                                             |
| 7 | 64711713 | 64713057 | KD2-H4K8ac_peak_26437 | 12.02773 |                                                             |
| 7 | 64838096 | 64838508 | KD2-H4K8ac_peak_26438 | 9.95119  | ZNF92_ENSG00000146757                                       |
| 7 | 64838840 | 64839038 | KD2-H4K8ac_peak_26439 | 11.80283 | ZNF92_ENSG00000146757                                       |
| 7 | 65215550 | 65215851 | KD2-H4K8ac_peak_26440 | 8.86099  | CCT6P1_ENSG00000228409                                      |
| 7 | 65216106 | 65216635 | KD2-H4K8ac_peak_26441 | 9.36516  | CCT6P1_ENSG00000228409                                      |
| 7 | 65235447 | 65235712 | KD2-H4K8ac_peak_26442 | 16.04168 |                                                             |
| 7 | 65235911 | 65236487 | KD2-H4K8ac_peak_26443 | 12.08081 |                                                             |
| 7 | 65446903 | 65447697 | KD2-H4K8ac_peak_26444 | 22.54722 | GUSB_ENSG00000169919                                        |
| 7 | 65467285 | 65467539 | KD2-H4K8ac_peak_26445 | 5.29555  |                                                             |
| 7 | 65579080 | 65579661 | KD2-H4K8ac_peak_26446 | 6.52179  | CRCP_ENSG00000241258                                        |
| 7 | 65579900 | 65580360 | KD2-H4K8ac_peak_26447 | 17.67328 | CRCP_ENSG00000241258                                        |
| 7 | 65589162 | 65589428 | KD2-H4K8ac_peak_26448 | 11.27037 |                                                             |

|   |          |          |                       |          |                                                         |
|---|----------|----------|-----------------------|----------|---------------------------------------------------------|
| 7 | 65592398 | 65592724 | KD2-H4K8ac_peak_26449 | 6.45083  |                                                         |
| 7 | 65603497 | 65603740 | KD2-H4K8ac_peak_26450 | 5.61067  |                                                         |
| 7 | 65604913 | 65605300 | KD2-H4K8ac_peak_26451 | 9.36665  |                                                         |
| 7 | 65606444 | 65606677 | KD2-H4K8ac_peak_26452 | 7.74292  |                                                         |
| 7 | 65611177 | 65611372 | KD2-H4K8ac_peak_26453 | 6.28228  |                                                         |
| 7 | 65612126 | 65612327 | KD2-H4K8ac_peak_26454 | 3.83717  |                                                         |
| 7 | 65615883 | 65616573 | KD2-H4K8ac_peak_26455 | 10.52915 |                                                         |
| 7 | 65616906 | 65617318 | KD2-H4K8ac_peak_26456 | 8.58725  |                                                         |
| 7 | 65617925 | 65618220 | KD2-H4K8ac_peak_26457 | 7.76329  |                                                         |
| 7 | 65670369 | 65670826 | KD2-H4K8ac_peak_26458 | 10.44656 | TPST1_ENSG00000169902                                   |
| 7 | 65878689 | 65879047 | KD2-H4K8ac_peak_26459 | 10.29842 |                                                         |
| 7 | 65957549 | 65958493 | KD2-H4K8ac_peak_26460 | 11.44887 | GS1-124K5.3_ENSG00000223473;GS1-124K5.4_ENSG00000237310 |
| 7 | 65958767 | 65959535 | KD2-H4K8ac_peak_26461 | 15.14628 | GS1-124K5.3_ENSG00000223473;GS1-124K5.4_ENSG00000237310 |
| 7 | 66007777 | 66007991 | KD2-H4K8ac_peak_26462 | 6.85508  | GS1-124K5.11_ENSG00000229180                            |
| 7 | 66056953 | 66057313 | KD2-H4K8ac_peak_26463 | 16.18205 | GS1-124K5.12_ENSG00000232559                            |
| 7 | 66057658 | 66058087 | KD2-H4K8ac_peak_26464 | 4.33139  | GS1-124K5.12_ENSG00000232559                            |
| 7 | 66084509 | 66084726 | KD2-H4K8ac_peak_26465 | 5.38282  |                                                         |
| 7 | 66092725 | 66093591 | KD2-H4K8ac_peak_26466 | 16.822   | KCTD7_ENSG00000243335                                   |
| 7 | 66093989 | 66094198 | KD2-H4K8ac_peak_26467 | 6.52179  | KCTD7_ENSG00000243335                                   |
| 7 | 66118608 | 66119421 | KD2-H4K8ac_peak_26468 | 16.86242 | RP4-756H11.3_ENSG00000226824                            |
| 7 | 66146582 | 66146959 | KD2-H4K8ac_peak_26469 | 11.03268 | RABGEF1_ENSG00000154710                                 |
| 7 | 66196847 | 66197194 | KD2-H4K8ac_peak_26470 | 6.66692  |                                                         |
| 7 | 66204966 | 66206312 | KD2-H4K8ac_peak_26471 | 22.28045 | RP11-792A8.4_ENSG00000272831                            |
| 7 | 66309137 | 66309824 | KD2-H4K8ac_peak_26472 | 15.76765 | GTF2IRD1P1_ENSG00000230583                              |
| 7 | 66310080 | 66310773 | KD2-H4K8ac_peak_26473 | 11.82518 | GTF2IRD1P1_ENSG00000230583                              |
| 7 | 66385726 | 66386067 | KD2-H4K8ac_peak_26474 | 17.79053 | TMEM248_ENSG00000106609                                 |
| 7 | 66386272 | 66386724 | KD2-H4K8ac_peak_26475 | 14.99434 | TMEM248_ENSG00000106609                                 |
| 7 | 66460202 | 66460475 | KD2-H4K8ac_peak_26476 | 4.67342  | SBDS_ENSG00000126524;TYW1_ENSG00000198874               |
| 7 | 66461010 | 66461220 | KD2-H4K8ac_peak_26477 | 6.66692  | SBDS_ENSG00000126524;TYW1_ENSG00000198874               |
| 7 | 66488074 | 66488353 | KD2-H4K8ac_peak_26478 | 7.27716  |                                                         |
| 7 | 66767061 | 66767388 | KD2-H4K8ac_peak_26479 | 13.80019 | PMS2P4_ENSG00000067601;STAG3L4_ENSG00000106610          |
| 7 | 66767675 | 66768282 | KD2-H4K8ac_peak_26480 | 11.92978 | PMS2P4_ENSG00000067601;STAG3L4_ENSG00000106610          |
| 7 | 66829777 | 66830035 | KD2-H4K8ac_peak_26481 | 5.54647  |                                                         |
| 7 | 66843471 | 66843743 | KD2-H4K8ac_peak_26482 | 8.17557  |                                                         |
| 7 | 66888663 | 66888862 | KD2-H4K8ac_peak_26483 | 8.83582  |                                                         |
| 7 | 66927332 | 66927526 | KD2-H4K8ac_peak_26484 | 8.6202   |                                                         |
| 7 | 67611299 | 67611600 | KD2-H4K8ac_peak_26485 | 4.35346  |                                                         |
| 7 | 67691336 | 67691529 | KD2-H4K8ac_peak_26486 | 4.52326  |                                                         |
| 7 | 67975991 | 67976642 | KD2-H4K8ac_peak_26487 | 7.49599  |                                                         |
| 7 | 68109664 | 68109860 | KD2-H4K8ac_peak_26488 | 4.06758  |                                                         |
| 7 | 68163233 | 68163552 | KD2-H4K8ac_peak_26489 | 9.16531  |                                                         |
| 7 | 68178649 | 68178964 | KD2-H4K8ac_peak_26490 | 4.211    |                                                         |
| 7 | 68802018 | 68802308 | KD2-H4K8ac_peak_26491 | 4.06758  |                                                         |
| 7 | 68895121 | 68895415 | KD2-H4K8ac_peak_26492 | 5.49497  | RP11-3P22.2_ENSG00000225718                             |
| 7 | 68910536 | 68911051 | KD2-H4K8ac_peak_26493 | 7.40314  |                                                         |
| 7 | 69062299 | 69063024 | KD2-H4K8ac_peak_26494 | 14.80472 | RP5-942I16.1_ENSG00000234215;AUTS2_ENSG00000158321      |

|   |          |          |                       |          |                                              |
|---|----------|----------|-----------------------|----------|----------------------------------------------|
| 7 | 69063487 | 69064058 | KD2-H4K8ac_peak_26495 | 7.07117  | AUTS2_ENSG00000158321                        |
| 7 | 69064464 | 69065322 | KD2-H4K8ac_peak_26496 | 10.66719 | AUTS2_ENSG00000158321                        |
| 7 | 69120715 | 69120914 | KD2-H4K8ac_peak_26497 | 5.30799  |                                              |
| 7 | 69205590 | 69205804 | KD2-H4K8ac_peak_26498 | 8.30974  |                                              |
| 7 | 69225539 | 69225786 | KD2-H4K8ac_peak_26499 | 9.37314  |                                              |
| 7 | 69282514 | 69282782 | KD2-H4K8ac_peak_26500 | 3.90565  |                                              |
| 7 | 69289152 | 69289437 | KD2-H4K8ac_peak_26501 | 6.36375  |                                              |
| 7 | 69290416 | 69290872 | KD2-H4K8ac_peak_26502 | 5.92591  |                                              |
| 7 | 69291116 | 69291497 | KD2-H4K8ac_peak_26503 | 4.211    |                                              |
| 7 | 69329863 | 69330663 | KD2-H4K8ac_peak_26504 | 10.84242 |                                              |
| 7 | 69331792 | 69332313 | KD2-H4K8ac_peak_26505 | 8.94469  |                                              |
| 7 | 69336241 | 69336532 | KD2-H4K8ac_peak_26506 | 6.40683  |                                              |
| 7 | 69345244 | 69345455 | KD2-H4K8ac_peak_26507 | 7.31433  |                                              |
| 7 | 69760069 | 69760347 | KD2-H4K8ac_peak_26508 | 5.405    |                                              |
| 7 | 69763141 | 69763333 | KD2-H4K8ac_peak_26509 | 6.65673  |                                              |
| 7 | 69822103 | 69822354 | KD2-H4K8ac_peak_26510 | 7.6718   |                                              |
| 7 | 69848783 | 69849178 | KD2-H4K8ac_peak_26511 | 4.98072  |                                              |
| 7 | 69871074 | 69871372 | KD2-H4K8ac_peak_26512 | 8.55271  |                                              |
| 7 | 69872877 | 69873120 | KD2-H4K8ac_peak_26513 | 5.557    |                                              |
| 7 | 69891280 | 69891493 | KD2-H4K8ac_peak_26514 | 4.77079  |                                              |
| 7 | 69910804 | 69911167 | KD2-H4K8ac_peak_26515 | 7.1181   |                                              |
| 7 | 69911841 | 69912079 | KD2-H4K8ac_peak_26516 | 5.4919   |                                              |
| 7 | 69936799 | 69936995 | KD2-H4K8ac_peak_26517 | 6.40297  |                                              |
| 7 | 69938319 | 69938708 | KD2-H4K8ac_peak_26518 | 6.77511  |                                              |
| 7 | 69939160 | 69939451 | KD2-H4K8ac_peak_26519 | 7.76329  |                                              |
| 7 | 69953056 | 69953285 | KD2-H4K8ac_peak_26520 | 4.06758  |                                              |
| 7 | 69962877 | 69963072 | KD2-H4K8ac_peak_26521 | 5.04237  |                                              |
| 7 | 69970668 | 69970987 | KD2-H4K8ac_peak_26522 | 8.14467  |                                              |
| 7 | 69977291 | 69977661 | KD2-H4K8ac_peak_26523 | 8.02296  |                                              |
| 7 | 70049550 | 70049889 | KD2-H4K8ac_peak_26524 | 14.69247 |                                              |
| 7 | 70079700 | 70080385 | KD2-H4K8ac_peak_26525 | 8.17557  |                                              |
| 7 | 70084020 | 70084448 | KD2-H4K8ac_peak_26526 | 10.21366 |                                              |
| 7 | 70111750 | 70112034 | KD2-H4K8ac_peak_26527 | 5.36511  |                                              |
| 7 | 70159071 | 70160655 | KD2-H4K8ac_peak_26528 | 17.67328 |                                              |
| 7 | 72003129 | 72003375 | KD2-H4K8ac_peak_26529 | 7.64093  |                                              |
| 7 | 72299190 | 72299619 | KD2-H4K8ac_peak_26530 | 6.85193  | TYW1B_ENSG00000254184;SBDSP1_ENSG00000225648 |
| 7 | 72300166 | 72300488 | KD2-H4K8ac_peak_26531 | 8.16906  | SBDSP1_ENSG00000225648                       |
| 7 | 72349156 | 72350566 | KD2-H4K8ac_peak_26532 | 17.10757 | POM121_ENSG00000196313                       |
| 7 | 72395205 | 72395492 | KD2-H4K8ac_peak_26533 | 9.61895  | RP11-313P13.5_ENSG00000272843                |
| 7 | 72722353 | 72722551 | KD2-H4K8ac_peak_26534 | 9.95119  | NSUN5_ENSG00000130305                        |
| 7 | 72722829 | 72723628 | KD2-H4K8ac_peak_26535 | 13.12288 | NSUN5_ENSG00000130305                        |
| 7 | 72738439 | 72738701 | KD2-H4K8ac_peak_26536 | 7.70067  |                                              |
| 7 | 72772046 | 72772296 | KD2-H4K8ac_peak_26537 | 8.14467  |                                              |
| 7 | 72813014 | 72813790 | KD2-H4K8ac_peak_26538 | 8.55271  |                                              |
| 7 | 72813994 | 72814619 | KD2-H4K8ac_peak_26539 | 13.95627 |                                              |
| 7 | 72819292 | 72819714 | KD2-H4K8ac_peak_26540 | 7.167    |                                              |

|   |          |          |                       |          |                                                 |
|---|----------|----------|-----------------------|----------|-------------------------------------------------|
| 7 | 72824893 | 72825096 | KD2-H4K8ac_peak_26541 | 4.51154  |                                                 |
| 7 | 72842882 | 72844417 | KD2-H4K8ac_peak_26542 | 14.68449 |                                                 |
| 7 | 72935732 | 72936547 | KD2-H4K8ac_peak_26543 | 15.12348 | BAZ1B_ENSG00000009954                           |
| 7 | 72936827 | 72938016 | KD2-H4K8ac_peak_26544 | 16.21436 | BAZ1B_ENSG00000009954                           |
| 7 | 72971732 | 72972553 | KD2-H4K8ac_peak_26545 | 24.91145 | BCL7B_ENSG00000106635                           |
| 7 | 72992385 | 72992859 | KD2-H4K8ac_peak_26546 | 10.17486 | TBL2_ENSG00000106638                            |
| 7 | 72993269 | 72993941 | KD2-H4K8ac_peak_26547 | 21.6161  | TBL2_ENSG00000106638                            |
| 7 | 73062036 | 73062574 | KD2-H4K8ac_peak_26548 | 11.24702 |                                                 |
| 7 | 73082222 | 73082839 | KD2-H4K8ac_peak_26549 | 14.68449 | VPS37D_ENSG00000176428                          |
| 7 | 73097146 | 73097710 | KD2-H4K8ac_peak_26550 | 14.06758 | DNAJC30_ENSG00000176410;WBSCR22_ENSG00000071462 |
| 7 | 73153402 | 73153910 | KD2-H4K8ac_peak_26551 | 11.3923  | ABHD11_ENSG00000106077                          |
| 7 | 73223931 | 73224187 | KD2-H4K8ac_peak_26552 | 5.87295  |                                                 |
| 7 | 73237067 | 73237331 | KD2-H4K8ac_peak_26553 | 5.13615  |                                                 |
| 7 | 73241125 | 73242175 | KD2-H4K8ac_peak_26554 | 7.49599  |                                                 |
| 7 | 73242805 | 73243471 | KD2-H4K8ac_peak_26555 | 7.76104  |                                                 |
| 7 | 73256146 | 73256346 | KD2-H4K8ac_peak_26556 | 5.0326   | WBSCR27_ENSG00000165171                         |
| 7 | 73256565 | 73256838 | KD2-H4K8ac_peak_26557 | 11.7608  | WBSCR27_ENSG00000165171                         |
| 7 | 73257053 | 73257486 | KD2-H4K8ac_peak_26558 | 7.07117  | WBSCR27_ENSG00000165171                         |
| 7 | 73279342 | 73280186 | KD2-H4K8ac_peak_26559 | 13.87818 |                                                 |
| 7 | 73284129 | 73284770 | KD2-H4K8ac_peak_26560 | 10.4923  |                                                 |
| 7 | 73333427 | 73334140 | KD2-H4K8ac_peak_26561 | 7.76104  |                                                 |
| 7 | 73334785 | 73335141 | KD2-H4K8ac_peak_26562 | 13.59098 |                                                 |
| 7 | 73336040 | 73336249 | KD2-H4K8ac_peak_26563 | 7.95563  |                                                 |
| 7 | 73388990 | 73389499 | KD2-H4K8ac_peak_26564 | 5.06906  |                                                 |
| 7 | 73397903 | 73398251 | KD2-H4K8ac_peak_26565 | 10.77651 |                                                 |
| 7 | 73400299 | 73400689 | KD2-H4K8ac_peak_26566 | 5.98692  | RP11-731K22.1_ENSG00000261467                   |
| 7 | 73427524 | 73428092 | KD2-H4K8ac_peak_26567 | 7.98621  |                                                 |
| 7 | 73428304 | 73428514 | KD2-H4K8ac_peak_26568 | 4.86324  |                                                 |
| 7 | 73437008 | 73437200 | KD2-H4K8ac_peak_26569 | 4.54006  |                                                 |
| 7 | 73438515 | 73438747 | KD2-H4K8ac_peak_26570 | 4.30853  |                                                 |
| 7 | 73440920 | 73442244 | KD2-H4K8ac_peak_26571 | 5.4779   | ELN_ENSG00000049540                             |
| 7 | 73442465 | 73443094 | KD2-H4K8ac_peak_26572 | 7.73264  | ELN_ENSG00000049540                             |
| 7 | 73447560 | 73447847 | KD2-H4K8ac_peak_26573 | 11.55814 |                                                 |
| 7 | 73456921 | 73458434 | KD2-H4K8ac_peak_26574 | 20.3995  |                                                 |
| 7 | 73458712 | 73459619 | KD2-H4K8ac_peak_26575 | 13.02811 |                                                 |
| 7 | 73477353 | 73477744 | KD2-H4K8ac_peak_26576 | 4.94687  | CTB-51J22.1_ENSG00000232415                     |
| 7 | 73497346 | 73497854 | KD2-H4K8ac_peak_26577 | 25.8903  | LIMK1_ENSG00000106683                           |
| 7 | 73498284 | 73498735 | KD2-H4K8ac_peak_26578 | 9.58942  |                                                 |
| 7 | 73507115 | 73508560 | KD2-H4K8ac_peak_26579 | 13.83097 |                                                 |
| 7 | 73508838 | 73509525 | KD2-H4K8ac_peak_26580 | 23.17425 |                                                 |
| 7 | 73587916 | 73588447 | KD2-H4K8ac_peak_26581 | 10.66719 | EIF4H_ENSG00000106682                           |
| 7 | 73588680 | 73589301 | KD2-H4K8ac_peak_26582 | 39.45499 | EIF4H_ENSG00000106682                           |
| 7 | 73624518 | 73624740 | KD2-H4K8ac_peak_26583 | 5.48272  |                                                 |
| 7 | 73634785 | 73635003 | KD2-H4K8ac_peak_26584 | 4.06758  |                                                 |
| 7 | 73668477 | 73668708 | KD2-H4K8ac_peak_26585 | 9.67696  | RFC2_ENSG00000049541                            |
| 7 | 73668953 | 73669671 | KD2-H4K8ac_peak_26586 | 9.57101  | RFC2_ENSG00000049541                            |

|   |          |          |                       |          |                                                    |
|---|----------|----------|-----------------------|----------|----------------------------------------------------|
| 7 | 73684776 | 73684980 | KD2-H4K8ac_peak_26587 | 8.85813  |                                                    |
| 7 | 73686796 | 73687248 | KD2-H4K8ac_peak_26588 | 9.20193  |                                                    |
| 7 | 73703244 | 73703585 | KD2-H4K8ac_peak_26589 | 11.04256 | CLIP2_ENSG00000106665                              |
| 7 | 73703855 | 73704972 | KD2-H4K8ac_peak_26590 | 9.8795   | CLIP2_ENSG00000106665                              |
| 7 | 73831980 | 73832416 | KD2-H4K8ac_peak_26591 | 11.50346 |                                                    |
| 7 | 73866831 | 73867049 | KD2-H4K8ac_peak_26592 | 6.55628  |                                                    |
| 7 | 73867264 | 73867467 | KD2-H4K8ac_peak_26593 | 5.26288  | GTF2IRD1_ENSG00000006704                           |
| 7 | 73867668 | 73869349 | KD2-H4K8ac_peak_26594 | 45.96929 | GTF2IRD1_ENSG00000006704                           |
| 7 | 73892499 | 73892762 | KD2-H4K8ac_peak_26595 | 4.44527  |                                                    |
| 7 | 73895022 | 73895384 | KD2-H4K8ac_peak_26596 | 8.4716   |                                                    |
| 7 | 73919246 | 73919827 | KD2-H4K8ac_peak_26597 | 14.17488 |                                                    |
| 7 | 73920799 | 73921066 | KD2-H4K8ac_peak_26598 | 5.85291  |                                                    |
| 7 | 74020414 | 74021350 | KD2-H4K8ac_peak_26599 | 7.79592  | RP5-1186P10.2_ENSG00000273069                      |
| 7 | 74026785 | 74027359 | KD2-H4K8ac_peak_26600 | 5.34636  |                                                    |
| 7 | 74031521 | 74032089 | KD2-H4K8ac_peak_26601 | 10.53377 |                                                    |
| 7 | 74070095 | 74070485 | KD2-H4K8ac_peak_26602 | 4.44527  |                                                    |
| 7 | 74071240 | 74071754 | KD2-H4K8ac_peak_26603 | 17.09549 | GTF2L_ENSG00000077809                              |
| 7 | 74072033 | 74072730 | KD2-H4K8ac_peak_26604 | 66.72792 | GTF2L_ENSG00000077809                              |
| 7 | 74306342 | 74306671 | KD2-H4K8ac_peak_26605 | 14.68449 | STAG3L2_ENSG00000160828;PMS2P5_ENSG00000123965     |
| 7 | 74488902 | 74489597 | KD2-H4K8ac_peak_26606 | 22.99499 | WBSCR16_ENSG00000174374                            |
| 7 | 74489817 | 74490055 | KD2-H4K8ac_peak_26607 | 10.53377 | WBSCR16_ENSG00000174374                            |
| 7 | 74868046 | 74868247 | KD2-H4K8ac_peak_26608 | 7.76329  | GATSL2_ENSG00000198750                             |
| 7 | 75071844 | 75072292 | KD2-H4K8ac_peak_26609 | 7.74292  |                                                    |
| 7 | 75115041 | 75116004 | KD2-H4K8ac_peak_26610 | 15.82743 | POM121C_ENSG00000135213;AC006014.7_ENSG00000242073 |
| 7 | 75156869 | 75157388 | KD2-H4K8ac_peak_26611 | 11.97691 | PMS2P3_ENSG00000127957                             |
| 7 | 75158000 | 75158263 | KD2-H4K8ac_peak_26612 | 5.81222  | PMS2P3_ENSG00000127957                             |
| 7 | 75267856 | 75268213 | KD2-H4K8ac_peak_26613 | 8.58725  |                                                    |
| 7 | 75268646 | 75269438 | KD2-H4K8ac_peak_26614 | 21.12734 |                                                    |
| 7 | 75367904 | 75368266 | KD2-H4K8ac_peak_26615 | 15.27939 | HIP1_ENSG00000127946                               |
| 7 | 75368694 | 75369126 | KD2-H4K8ac_peak_26616 | 16.54162 | HIP1_ENSG00000127946                               |
| 7 | 75496093 | 75496366 | KD2-H4K8ac_peak_26617 | 5.38581  |                                                    |
| 7 | 75507600 | 75508030 | KD2-H4K8ac_peak_26618 | 7.07117  |                                                    |
| 7 | 75508430 | 75508713 | KD2-H4K8ac_peak_26619 | 11.24702 |                                                    |
| 7 | 75543606 | 75544197 | KD2-H4K8ac_peak_26620 | 12.10889 | MIR4651_ENSG00000265020                            |
| 7 | 75567700 | 75567955 | KD2-H4K8ac_peak_26621 | 5.14125  |                                                    |
| 7 | 75592695 | 75592947 | KD2-H4K8ac_peak_26622 | 4.86324  |                                                    |
| 7 | 75624124 | 75624391 | KD2-H4K8ac_peak_26623 | 8.34752  | TMEM120A_ENSG00000189077                           |
| 7 | 75676925 | 75677253 | KD2-H4K8ac_peak_26624 | 6.0663   | STYXL1_ENSG00000127952;MDH2_ENSG00000146701        |
| 7 | 75677476 | 75677812 | KD2-H4K8ac_peak_26625 | 15.81243 | STYXL1_ENSG00000127952;MDH2_ENSG00000146701        |
| 7 | 75779669 | 75779925 | KD2-H4K8ac_peak_26626 | 7.76104  |                                                    |
| 7 | 75794733 | 75795826 | KD2-H4K8ac_peak_26627 | 12.66412 |                                                    |
| 7 | 75796225 | 75796772 | KD2-H4K8ac_peak_26628 | 6.20982  |                                                    |
| 7 | 75807306 | 75807547 | KD2-H4K8ac_peak_26629 | 9.26408  |                                                    |
| 7 | 75807764 | 75808228 | KD2-H4K8ac_peak_26630 | 11.80283 |                                                    |
| 7 | 75814482 | 75815746 | KD2-H4K8ac_peak_26631 | 15.50901 |                                                    |
| 7 | 75831251 | 75831581 | KD2-H4K8ac_peak_26632 | 12.08081 | SRRM3_ENSG00000177679                              |

|   |          |          |                       |          |                                                   |
|---|----------|----------|-----------------------|----------|---------------------------------------------------|
| 7 | 75864010 | 75864548 | KD2-H4K8ac_peak_26633 | 5.59859  |                                                   |
| 7 | 75878796 | 75879058 | KD2-H4K8ac_peak_26634 | 7.49599  |                                                   |
| 7 | 75879664 | 75880102 | KD2-H4K8ac_peak_26635 | 8.65175  |                                                   |
| 7 | 75880453 | 75881143 | KD2-H4K8ac_peak_26636 | 13.12288 |                                                   |
| 7 | 75889034 | 75889400 | KD2-H4K8ac_peak_26637 | 14.8083  |                                                   |
| 7 | 75889971 | 75890437 | KD2-H4K8ac_peak_26638 | 7.95563  |                                                   |
| 7 | 75910687 | 75911165 | KD2-H4K8ac_peak_26639 | 11.48808 |                                                   |
| 7 | 75920603 | 75920897 | KD2-H4K8ac_peak_26640 | 5.3157   |                                                   |
| 7 | 75921385 | 75921738 | KD2-H4K8ac_peak_26641 | 11.05467 |                                                   |
| 7 | 75923763 | 75925345 | KD2-H4K8ac_peak_26642 | 20.5798  |                                                   |
| 7 | 75931964 | 75932777 | KD2-H4K8ac_peak_26643 | 16.67374 | HSPB1_ENSG00000106211                             |
| 7 | 75935807 | 75936990 | KD2-H4K8ac_peak_26644 | 11.26685 |                                                   |
| 7 | 75939936 | 75940322 | KD2-H4K8ac_peak_26645 | 8.53092  |                                                   |
| 7 | 75946665 | 75947340 | KD2-H4K8ac_peak_26646 | 13.4748  |                                                   |
| 7 | 75947650 | 75948071 | KD2-H4K8ac_peak_26647 | 6.40874  |                                                   |
| 7 | 75987723 | 75988212 | KD2-H4K8ac_peak_26648 | 8.58725  | YWHAG_ENSG00000170027                             |
| 7 | 75988840 | 75989237 | KD2-H4K8ac_peak_26649 | 14.3323  | YWHAG_ENSG00000170027                             |
| 7 | 75993758 | 75994139 | KD2-H4K8ac_peak_26650 | 6.80057  |                                                   |
| 7 | 76008363 | 76008717 | KD2-H4K8ac_peak_26651 | 5.71781  |                                                   |
| 7 | 76008967 | 76009247 | KD2-H4K8ac_peak_26652 | 19.55721 |                                                   |
| 7 | 76009503 | 76010216 | KD2-H4K8ac_peak_26653 | 16.07478 |                                                   |
| 7 | 76018488 | 76018964 | KD2-H4K8ac_peak_26654 | 10.09333 |                                                   |
| 7 | 76021798 | 76023445 | KD2-H4K8ac_peak_26655 | 26.39175 |                                                   |
| 7 | 76024646 | 76024922 | KD2-H4K8ac_peak_26656 | 7.02255  |                                                   |
| 7 | 76026793 | 76027357 | KD2-H4K8ac_peak_26657 | 24.02151 | ZP3_ENSG00000188372                               |
| 7 | 76139710 | 76140047 | KD2-H4K8ac_peak_26658 | 6.29509  | UPK3B_ENSG00000243566                             |
| 7 | 76177962 | 76178485 | KD2-H4K8ac_peak_26659 | 13.27022 | AC004980.7_ENSG00000205485                        |
| 7 | 76178681 | 76179153 | KD2-H4K8ac_peak_26660 | 25.30532 | AC004980.7_ENSG00000205485                        |
| 7 | 76256442 | 76257075 | KD2-H4K8ac_peak_26661 | 10.29842 | POMZP3_ENSG00000146707                            |
| 7 | 76913275 | 76913492 | KD2-H4K8ac_peak_26662 | 7.47462  |                                                   |
| 7 | 76962204 | 76962507 | KD2-H4K8ac_peak_26663 | 8.70953  |                                                   |
| 7 | 77044921 | 77046149 | KD2-H4K8ac_peak_26664 | 25.94184 | GSAP_ENSG00000186088;RP5-899E9.1_ENSG00000273341  |
| 7 | 77165955 | 77166148 | KD2-H4K8ac_peak_26665 | 8.95692  | PTPN12_ENSG00000127947                            |
| 7 | 77166907 | 77167670 | KD2-H4K8ac_peak_26666 | 7.07117  | PTPN12_ENSG00000127947                            |
| 7 | 77264223 | 77264679 | KD2-H4K8ac_peak_26667 | 5.49367  |                                                   |
| 7 | 77325824 | 77326518 | KD2-H4K8ac_peak_26668 | 14.95275 | RSBN1L-AS1_ENSG00000214293;RSBN1L_ENSG00000187257 |
| 7 | 77428195 | 77428730 | KD2-H4K8ac_peak_26669 | 7.28628  | TMEM60_ENSG00000135211;PHTF2_ENSG00000006576      |
| 7 | 77648453 | 77648649 | KD2-H4K8ac_peak_26670 | 5.54082  |                                                   |
| 7 | 77649484 | 77649792 | KD2-H4K8ac_peak_26671 | 16.95399 |                                                   |
| 7 | 77749825 | 77750031 | KD2-H4K8ac_peak_26672 | 5.04237  |                                                   |
| 7 | 78102960 | 78103172 | KD2-H4K8ac_peak_26673 | 6.56211  |                                                   |
| 7 | 78119293 | 78119489 | KD2-H4K8ac_peak_26674 | 5.15777  |                                                   |
| 7 | 78400441 | 78400673 | KD2-H4K8ac_peak_26675 | 6.99815  |                                                   |
| 7 | 79081382 | 79081934 | KD2-H4K8ac_peak_26676 | 11.8457  | MAGI2_ENSG00000187391;MAGI2-AS3_ENSG00000234456   |
| 7 | 79082259 | 79082858 | KD2-H4K8ac_peak_26677 | 9.65086  | MAGI2_ENSG00000187391;MAGI2-AS3_ENSG00000234456   |
| 7 | 79083065 | 79083630 | KD2-H4K8ac_peak_26678 | 10.66719 | MAGI2_ENSG00000187391;MAGI2-AS3_ENSG00000234456   |



|   |          |          |                       |          |                                                  |
|---|----------|----------|-----------------------|----------|--------------------------------------------------|
| 7 | 79237476 | 79237761 | KD2-H4K8ac_peak_26679 | 4.77079  |                                                  |
| 7 | 79240023 | 79240231 | KD2-H4K8ac_peak_26680 | 10.63441 |                                                  |
| 7 | 79241276 | 79241671 | KD2-H4K8ac_peak_26681 | 10.58496 |                                                  |
| 7 | 79241923 | 79242184 | KD2-H4K8ac_peak_26682 | 9.4551   |                                                  |
| 7 | 79446472 | 79446669 | KD2-H4K8ac_peak_26683 | 7.13615  |                                                  |
| 7 | 79582922 | 79583189 | KD2-H4K8ac_peak_26684 | 9.43685  |                                                  |
| 7 | 79649219 | 79649472 | KD2-H4K8ac_peak_26685 | 7.83656  |                                                  |
| 7 | 79763675 | 79763993 | KD2-H4K8ac_peak_26686 | 10.44656 | GNAI1_ENSG00000127955                            |
| 7 | 79764271 | 79764897 | KD2-H4K8ac_peak_26687 | 9.95119  |                                                  |
| 7 | 79765142 | 79765336 | KD2-H4K8ac_peak_26688 | 7.6718   |                                                  |
| 7 | 80400002 | 80400310 | KD2-H4K8ac_peak_26689 | 7.27716  |                                                  |
| 7 | 80460008 | 80460289 | KD2-H4K8ac_peak_26690 | 5.04761  |                                                  |
| 7 | 80488160 | 80488371 | KD2-H4K8ac_peak_26691 | 7.22457  |                                                  |
| 7 | 80534736 | 80535253 | KD2-H4K8ac_peak_26692 | 8.37231  |                                                  |
| 7 | 80538923 | 80539123 | KD2-H4K8ac_peak_26693 | 6.03202  |                                                  |
| 7 | 81809766 | 81809974 | KD2-H4K8ac_peak_26694 | 5.16439  |                                                  |
| 7 | 81876471 | 81876743 | KD2-H4K8ac_peak_26695 | 9.16605  |                                                  |
| 7 | 81885323 | 81885542 | KD2-H4K8ac_peak_26696 | 7.47462  |                                                  |
| 7 | 81946687 | 81947116 | KD2-H4K8ac_peak_26697 | 5.71749  |                                                  |
| 7 | 82072383 | 82073066 | KD2-H4K8ac_peak_26698 | 19.28826 | CACNA2D1_ENSG00000153956                         |
| 7 | 82356467 | 82356739 | KD2-H4K8ac_peak_26699 | 7.45501  |                                                  |
| 7 | 82791877 | 82792147 | KD2-H4K8ac_peak_26700 | 7.86176  | PCLO_ENSG00000186472                             |
| 7 | 84266737 | 84267131 | KD2-H4K8ac_peak_26701 | 15.7388  |                                                  |
| 7 | 84815838 | 84816054 | KD2-H4K8ac_peak_26702 | 7.43893  | SEMA3D_ENSG00000153993                           |
| 7 | 84816311 | 84816668 | KD2-H4K8ac_peak_26703 | 6.13909  | SEMA3D_ENSG00000153993                           |
| 7 | 86274131 | 86274338 | KD2-H4K8ac_peak_26704 | 5.75757  | GRM3_ENSG00000198822                             |
| 7 | 86669108 | 86669911 | KD2-H4K8ac_peak_26705 | 8.4716   |                                                  |
| 7 | 86688637 | 86688861 | KD2-H4K8ac_peak_26706 | 3.97079  | KIAA1324L_ENSG00000164659                        |
| 7 | 86689286 | 86689667 | KD2-H4K8ac_peak_26707 | 8.28234  | KIAA1324L_ENSG00000164659                        |
| 7 | 86780808 | 86781145 | KD2-H4K8ac_peak_26708 | 4.37815  | AC005076.5_ENSG00000224046;DMTF1_ENSG00000135164 |
| 7 | 86781865 | 86782160 | KD2-H4K8ac_peak_26709 | 17.90608 | AC005076.5_ENSG00000224046;DMTF1_ENSG00000135164 |
| 7 | 86848660 | 86849050 | KD2-H4K8ac_peak_26710 | 8.95143  | TMEM243_ENSG00000135185;Y_RNA_ENSG00000200397    |
| 7 | 86849400 | 86849838 | KD2-H4K8ac_peak_26711 | 12.40345 | TMEM243_ENSG00000135185                          |
| 7 | 86975025 | 86975337 | KD2-H4K8ac_peak_26712 | 11.04256 | TP53TG1_ENSG00000182165;CROT_ENSG00000005469     |
| 7 | 87104607 | 87105735 | KD2-H4K8ac_peak_26713 | 27.26991 |                                                  |
| 7 | 87505028 | 87505448 | KD2-H4K8ac_peak_26714 | 7.44247  | SLC25A40_ENSG00000075303;DBF4_ENSG00000006634    |
| 7 | 87505898 | 87506393 | KD2-H4K8ac_peak_26715 | 5.96384  | SLC25A40_ENSG00000075303;DBF4_ENSG00000006634    |
| 7 | 87563661 | 87563946 | KD2-H4K8ac_peak_26716 | 14.32197 | ADAM22_ENSG00000008277                           |
| 7 | 87673732 | 87674580 | KD2-H4K8ac_peak_26717 | 8.30974  |                                                  |
| 7 | 87849033 | 87849886 | KD2-H4K8ac_peak_26718 | 11.04256 | AC003991.3_ENSG00000228113                       |
| 7 | 89748251 | 89748474 | KD2-H4K8ac_peak_26719 | 10.1591  | DPY19L2P4_ENSG00000235436                        |
| 7 | 89748751 | 89749106 | KD2-H4K8ac_peak_26720 | 6.25869  | DPY19L2P4_ENSG00000235436                        |
| 7 | 89783810 | 89784042 | KD2-H4K8ac_peak_26721 | 7.49599  | STEAP1_ENSG00000164647                           |
| 7 | 89840795 | 89841013 | KD2-H4K8ac_peak_26722 | 8.3261   | STEAP2-AS1_ENSG00000227646                       |
| 7 | 89950234 | 89950552 | KD2-H4K8ac_peak_26723 | 5.71749  |                                                  |
| 7 | 89975542 | 89975823 | KD2-H4K8ac_peak_26724 | 6.99815  |                                                  |

|   |          |          |                       |          |                                                   |
|---|----------|----------|-----------------------|----------|---------------------------------------------------|
| 7 | 89976022 | 89976460 | KD2-H4K8ac_peak_26725 | 15.13261 |                                                   |
| 7 | 90032867 | 90033218 | KD2-H4K8ac_peak_26726 | 9.61895  | CTB-13L3.1_ENSG00000273299                        |
| 7 | 90224826 | 90226009 | KD2-H4K8ac_peak_26727 | 9.95119  | AC002456.2_ENSG00000223969                        |
| 7 | 90893953 | 90894999 | KD2-H4K8ac_peak_26728 | 6.20982  | FZD1_ENSG00000157240                              |
| 7 | 90942561 | 90943115 | KD2-H4K8ac_peak_26729 | 9.15329  |                                                   |
| 7 | 91195086 | 91195515 | KD2-H4K8ac_peak_26730 | 12.14909 |                                                   |
| 7 | 91510205 | 91510465 | KD2-H4K8ac_peak_26731 | 9.11891  | MTERF_ENSG00000127989                             |
| 7 | 91569520 | 91570580 | KD2-H4K8ac_peak_26732 | 18.54875 | AKAP9_ENSG00000127914                             |
| 7 | 91585023 | 91585219 | KD2-H4K8ac_peak_26733 | 7.76569  |                                                   |
| 7 | 91763289 | 91764796 | KD2-H4K8ac_peak_26734 | 11.80283 | CTB-161K23.1_ENSG00000188693                      |
| 7 | 91808442 | 91809118 | KD2-H4K8ac_peak_26735 | 10.96455 | LRRD1_ENSG00000240720                             |
| 7 | 91874829 | 91875544 | KD2-H4K8ac_peak_26736 | 14.80472 | KRIT1_ENSG0000001631;ANKIB1_ENSG00000001629       |
| 7 | 92053824 | 92054021 | KD2-H4K8ac_peak_26737 | 8.85813  |                                                   |
| 7 | 92076117 | 92076534 | KD2-H4K8ac_peak_26738 | 11.90231 | GATAD1_ENSG00000157259                            |
| 7 | 92076830 | 92077383 | KD2-H4K8ac_peak_26739 | 12.92667 | GATAD1_ENSG00000157259                            |
| 7 | 92157446 | 92157709 | KD2-H4K8ac_peak_26740 | 10.44656 | PEX1_ENSG00000127980;RBM48_ENSG00000127993        |
| 7 | 92158174 | 92158501 | KD2-H4K8ac_peak_26741 | 5.59859  | PEX1_ENSG00000127980;RBM48_ENSG00000127993        |
| 7 | 92219236 | 92219642 | KD2-H4K8ac_peak_26742 | 11.3923  | FAM133B_ENSG00000234545                           |
| 7 | 92260449 | 92260647 | KD2-H4K8ac_peak_26743 | 4.87807  |                                                   |
| 7 | 92401920 | 92402144 | KD2-H4K8ac_peak_26744 | 6.2781   |                                                   |
| 7 | 92409292 | 92409492 | KD2-H4K8ac_peak_26745 | 4.06758  |                                                   |
| 7 | 92409752 | 92410018 | KD2-H4K8ac_peak_26746 | 7.58939  |                                                   |
| 7 | 92462031 | 92463421 | KD2-H4K8ac_peak_26747 | 10.19949 |                                                   |
| 7 | 92464069 | 92466753 | KD2-H4K8ac_peak_26748 | 18.94636 | CDK6_ENSG00000105810;AC002454.1_ENSG00000237819   |
| 7 | 92645438 | 92645978 | KD2-H4K8ac_peak_26749 | 6.63018  |                                                   |
| 7 | 92776713 | 92776938 | KD2-H4K8ac_peak_26750 | 5.14125  | SAMD9L_ENSG00000177409                            |
| 7 | 93519831 | 93520145 | KD2-H4K8ac_peak_26751 | 7.40314  | TFPI2_ENSG00000105825;AC002076.10_ENSG00000234695 |
| 7 | 93548739 | 93548937 | KD2-H4K8ac_peak_26752 | 7.42204  |                                                   |
| 7 | 93549607 | 93550048 | KD2-H4K8ac_peak_26753 | 5.69023  | GNG11_ENSG00000127920                             |
| 7 | 93550473 | 93550807 | KD2-H4K8ac_peak_26754 | 8.55271  | GNG11_ENSG00000127920                             |
| 7 | 93551005 | 93551724 | KD2-H4K8ac_peak_26755 | 16.54484 | GNG11_ENSG00000127920                             |
| 7 | 93581993 | 93582192 | KD2-H4K8ac_peak_26756 | 4.82979  |                                                   |
| 7 | 93595352 | 93595556 | KD2-H4K8ac_peak_26757 | 4.211    |                                                   |
| 7 | 93633253 | 93634319 | KD2-H4K8ac_peak_26758 | 19.35989 | BET1_ENSG00000105829                              |
| 7 | 93997294 | 93997722 | KD2-H4K8ac_peak_26759 | 14.15075 |                                                   |
| 7 | 93998859 | 93999140 | KD2-H4K8ac_peak_26760 | 5.77265  |                                                   |
| 7 | 94138635 | 94140150 | KD2-H4K8ac_peak_26761 | 23.50561 | CASD1_ENSG00000127995                             |
| 7 | 94284740 | 94285449 | KD2-H4K8ac_peak_26762 | 15.66774 | SGCE_ENSG00000127990;PEG10_ENSG00000242265        |
| 7 | 94536526 | 94538117 | KD2-H4K8ac_peak_26763 | 26.38304 | PPP1R9A_ENSG00000158528                           |
| 7 | 94555270 | 94555587 | KD2-H4K8ac_peak_26764 | 5.43522  |                                                   |
| 7 | 94634059 | 94634282 | KD2-H4K8ac_peak_26765 | 5.14125  |                                                   |
| 7 | 95063956 | 95065215 | KD2-H4K8ac_peak_26766 | 12.14337 | PON2_ENSG00000105854                              |
| 7 | 95105880 | 95106096 | KD2-H4K8ac_peak_26767 | 6.99815  |                                                   |
| 7 | 95317023 | 95317225 | KD2-H4K8ac_peak_26768 | 10.0692  |                                                   |
| 7 | 95705461 | 95705832 | KD2-H4K8ac_peak_26769 | 7.27716  |                                                   |
| 7 | 95950846 | 95951741 | KD2-H4K8ac_peak_26770 | 11.7608  | SLC25A13_ENSG00000004864                          |

|   |          |          |                       |          |                                                                           |
|---|----------|----------|-----------------------|----------|---------------------------------------------------------------------------|
| 7 | 96044617 | 96045010 | KD2-H4K8ac_peak_26771 | 6.05809  |                                                                           |
| 7 | 96339445 | 96339768 | KD2-H4K8ac_peak_26772 | 6.40683  | SHFM1_ENSG00000127922                                                     |
| 7 | 96635461 | 96636327 | KD2-H4K8ac_peak_26773 | 13.57076 | DLX6_ENSG0000006377;DLX6-AS2_ENSG00000271956                              |
| 7 | 96645708 | 96646909 | KD2-H4K8ac_peak_26774 | 19.5643  |                                                                           |
| 7 | 96746371 | 96746767 | KD2-H4K8ac_peak_26775 | 10.7186  | ACN9_ENSG00000196636                                                      |
| 7 | 97501528 | 97501736 | KD2-H4K8ac_peak_26776 | 11.7608  | ASNS_ENSG00000070669                                                      |
| 7 | 97501949 | 97502379 | KD2-H4K8ac_peak_26777 | 9.57101  | ASNS_ENSG00000070669                                                      |
| 7 | 97601176 | 97602166 | KD2-H4K8ac_peak_26778 | 23.43329 | AC004967.7_ENSG00000243554                                                |
| 7 | 97735461 | 97735824 | KD2-H4K8ac_peak_26779 | 11.60333 | LMTK2_ENSG00000164715                                                     |
| 7 | 97736222 | 97736541 | KD2-H4K8ac_peak_26780 | 19.51835 | LMTK2_ENSG00000164715                                                     |
| 7 | 97880881 | 97881487 | KD2-H4K8ac_peak_26781 | 16.89142 | TECPR1_ENSG00000205356;BRI3_ENSG00000164713                               |
| 7 | 97910073 | 97910552 | KD2-H4K8ac_peak_26782 | 16.81097 |                                                                           |
| 7 | 97911161 | 97911544 | KD2-H4K8ac_peak_26783 | 13.83097 |                                                                           |
| 7 | 98029982 | 98030357 | KD2-H4K8ac_peak_26784 | 10.19949 | BALAP2L1_ENSG00000006453                                                  |
| 7 | 98030697 | 98030957 | KD2-H4K8ac_peak_26785 | 7.28628  | BALAP2L1_ENSG00000006453                                                  |
| 7 | 98071034 | 98071341 | KD2-H4K8ac_peak_26786 | 4.98072  |                                                                           |
| 7 | 98182945 | 98183255 | KD2-H4K8ac_peak_26787 | 7.04698  |                                                                           |
| 7 | 98184581 | 98185540 | KD2-H4K8ac_peak_26788 | 12.57865 |                                                                           |
| 7 | 98185850 | 98186825 | KD2-H4K8ac_peak_26789 | 15.66774 |                                                                           |
| 7 | 98187156 | 98187922 | KD2-H4K8ac_peak_26790 | 10.93807 |                                                                           |
| 7 | 98189171 | 98189479 | KD2-H4K8ac_peak_26791 | 5.53033  |                                                                           |
| 7 | 98191271 | 98192078 | KD2-H4K8ac_peak_26792 | 10.35678 |                                                                           |
| 7 | 98192732 | 98193299 | KD2-H4K8ac_peak_26793 | 11.58876 |                                                                           |
| 7 | 98195937 | 98196195 | KD2-H4K8ac_peak_26794 | 5.70355  |                                                                           |
| 7 | 98196511 | 98196772 | KD2-H4K8ac_peak_26795 | 7.74292  |                                                                           |
| 7 | 98197016 | 98197285 | KD2-H4K8ac_peak_26796 | 16.4739  |                                                                           |
| 7 | 98197812 | 98198131 | KD2-H4K8ac_peak_26797 | 11.27376 |                                                                           |
| 7 | 98198481 | 98198761 | KD2-H4K8ac_peak_26798 | 13.92465 |                                                                           |
| 7 | 98199110 | 98199808 | KD2-H4K8ac_peak_26799 | 6.98244  |                                                                           |
| 7 | 98245923 | 98246388 | KD2-H4K8ac_peak_26800 | 22.66567 | NPTX2_ENSG00000106236                                                     |
| 7 | 98408086 | 98408356 | KD2-H4K8ac_peak_26801 | 4.54006  |                                                                           |
| 7 | 98465355 | 98465818 | KD2-H4K8ac_peak_26802 | 14.80472 |                                                                           |
| 7 | 98466708 | 98467815 | KD2-H4K8ac_peak_26803 | 10.84707 | TMEM130_ENSG00000166448                                                   |
| 7 | 98475478 | 98475998 | KD2-H4K8ac_peak_26804 | 13.12288 | TRRAP_ENSG00000196367                                                     |
| 7 | 98476195 | 98477048 | KD2-H4K8ac_peak_26805 | 29.06047 | TRRAP_ENSG00000196367                                                     |
| 7 | 98741228 | 98741629 | KD2-H4K8ac_peak_26806 | 18.94636 | SMURF1_ENSG00000198742                                                    |
| 7 | 98741839 | 98742128 | KD2-H4K8ac_peak_26807 | 14.66631 | SMURF1_ENSG00000198742                                                    |
| 7 | 98922570 | 98923292 | KD2-H4K8ac_peak_26808 | 20.2003  | ARPC1A_ENSG00000241685                                                    |
| 7 | 98923598 | 98923913 | KD2-H4K8ac_peak_26809 | 11.01051 | ARPC1A_ENSG00000241685                                                    |
| 7 | 98971759 | 98972198 | KD2-H4K8ac_peak_26810 | 6.40297  | ARPC1B_ENSG00000130429                                                    |
| 7 | 98972749 | 98973256 | KD2-H4K8ac_peak_26811 | 7.92775  | ARPC1B_ENSG00000130429                                                    |
| 7 | 98989936 | 98990983 | KD2-H4K8ac_peak_26812 | 7.57336  |                                                                           |
| 7 | 99005702 | 99006834 | KD2-H4K8ac_peak_26813 | 21.58607 | PDAP1_ENSG00000106244;BUD31_ENSG00000106245                               |
| 7 | 99036146 | 99036362 | KD2-H4K8ac_peak_26814 | 10.31695 | CPSF4_ENSG00000160917                                                     |
| 7 | 99036607 | 99036910 | KD2-H4K8ac_peak_26815 | 9.75958  | CPSF4_ENSG00000160917                                                     |
| 7 | 99063365 | 99064183 | KD2-H4K8ac_peak_26816 | 16.67374 | PTCD1_ENSG00000106246;ATP5J2-PTCD1_ENSG00000248919;ATP5J2_ENSG00000241468 |

|   |           |          |                       |          |                                                                                       |
|---|-----------|----------|-----------------------|----------|---------------------------------------------------------------------------------------|
| 7 | 99068559  | 99069302 | KD2-H4K8ac_peak_26817 | 9.36516  |                                                                                       |
| 7 | 99069791  | 99070101 | KD2-H4K8ac_peak_26818 | 7.28628  | ZNF789_ENSG00000198556                                                                |
| 7 | 99070591  | 99070837 | KD2-H4K8ac_peak_26819 | 10.19949 | ZNF789_ENSG00000198556                                                                |
| 7 | 99097516  | 99097786 | KD2-H4K8ac_peak_26820 | 5.59859  | ZNF394_ENSG00000160908                                                                |
| 7 | 99098064  | 99098710 | KD2-H4K8ac_peak_26821 | 9.95119  | ZNF394_ENSG00000160908                                                                |
| 7 | 99101592  | 99102095 | KD2-H4K8ac_peak_26822 | 15.50901 | ZKSCAN5_ENSG00000196652                                                               |
| 7 | 99102377  | 99103092 | KD2-H4K8ac_peak_26823 | 23.44586 | ZKSCAN5_ENSG00000196652                                                               |
| 7 | 99149300  | 99149736 | KD2-H4K8ac_peak_26824 | 13.59098 |                                                                                       |
| 7 | 99155550  | 99156756 | KD2-H4K8ac_peak_26825 | 21.65622 | FAM200A_ENSG00000221909;ZNF655_ENSG00000197343;GS1-259H13.10_ENSG00000272647          |
| 7 | 99177518  | 99178473 | KD2-H4K8ac_peak_26826 | 18.95762 |                                                                                       |
| 7 | 99213689  | 99215308 | KD2-H4K8ac_peak_26827 | 18.53991 | ZSCAN25_ENSG00000197037                                                               |
| 7 | 99613266  | 99613875 | KD2-H4K8ac_peak_26828 | 23.11743 | ZKSCAN1_ENSG00000106261                                                               |
| 7 | 99646730  | 99647819 | KD2-H4K8ac_peak_26829 | 38.17977 | ZSCAN21_ENSG00000166529                                                               |
| 7 | 99678973  | 99679307 | KD2-H4K8ac_peak_26830 | 23.8784  | ZNF3_ENSG00000166526                                                                  |
| 7 | 99679905  | 99680144 | KD2-H4K8ac_peak_26831 | 6.30607  | ZNF3_ENSG00000166526                                                                  |
| 7 | 99686143  | 99686988 | KD2-H4K8ac_peak_26832 | 19.28826 | COPS6_ENSG00000168090                                                                 |
| 7 | 99698442  | 99698942 | KD2-H4K8ac_peak_26833 | 12.48406 | MCM7_ENSG00000166508;AP4M1_ENSG00000221838                                            |
| 7 | 99699725  | 99700553 | KD2-H4K8ac_peak_26834 | 6.66359  | MCM7_ENSG00000166508;AP4M1_ENSG00000221838                                            |
| 7 | 99716668  | 99716904 | KD2-H4K8ac_peak_26835 | 11.5744  | TAF6_ENSG00000106290;CNPY4_ENSG00000166997                                            |
| 7 | 99717974  | 99718358 | KD2-H4K8ac_peak_26836 | 5.02474  | TAF6_ENSG00000106290;CNPY4_ENSG00000166997                                            |
| 7 | 99724379  | 99724685 | KD2-H4K8ac_peak_26837 | 11.01051 | RP11-506M12.1_ENSG00000242798;MBLAC1_ENSG00000214309                                  |
| 7 | 99724917  | 99725856 | KD2-H4K8ac_peak_26838 | 11.85249 | RP11-506M12.1_ENSG00000242798;MBLAC1_ENSG00000214309                                  |
| 7 | 99745590  | 99746181 | KD2-H4K8ac_peak_26839 | 7.25989  | LAMTOR4_ENSG00000188186                                                               |
| 7 | 99746654  | 99747148 | KD2-H4K8ac_peak_26840 | 8.35267  | LAMTOR4_ENSG00000188186                                                               |
| 7 | 99755677  | 99756757 | KD2-H4K8ac_peak_26841 | 13.95627 | C7orf43_ENSG00000146826                                                               |
| 7 | 99765925  | 99766143 | KD2-H4K8ac_peak_26842 | 9.63487  | GAL3ST4_ENSG00000197093                                                               |
| 7 | 99774718  | 99774936 | KD2-H4K8ac_peak_26843 | 8.36432  | GPC2_ENSG00000213420;STAG3_ENSG00000066923                                            |
| 7 | 99933242  | 99933513 | KD2-H4K8ac_peak_26844 | 17.36862 | STAG3L5P_ENSG00000242294;STAG3L5P-PVRIG2P-PILRB_ENSG00000272752;PILRB_ENSG00000121716 |
| 7 | 100025632 | 1E+08    | KD2-H4K8ac_peak_26845 | 20.18584 | ZCWPW1_ENSG00000078487;MEPCE_ENSG00000146834                                          |
| 7 | 100027033 | 1E+08    | KD2-H4K8ac_peak_26846 | 21.25745 | ZCWPW1_ENSG00000078487;MEPCE_ENSG00000146834                                          |
| 7 | 100027524 | 1E+08    | KD2-H4K8ac_peak_26847 | 44.39921 | ZCWPW1_ENSG00000078487                                                                |
| 7 | 100033305 | 1E+08    | KD2-H4K8ac_peak_26848 | 21.65622 | RP11-758P17.2_ENSG00000241357;PPP1R35_ENSG00000160813;RP11-758P17.3_ENSG00000240211   |
| 7 | 100034414 | 1E+08    | KD2-H4K8ac_peak_26849 | 12.65012 | PPP1R35_ENSG00000160813;RP11-758P17.3_ENSG00000240211                                 |
| 7 | 100047916 | 1E+08    | KD2-H4K8ac_peak_26850 | 24.02151 |                                                                                       |
| 7 | 100076551 | 1E+08    | KD2-H4K8ac_peak_26851 | 8.5092   | TSC22D4_ENSG00000166925                                                               |
| 7 | 100081124 | 1E+08    | KD2-H4K8ac_peak_26852 | 12.70959 | AC092849.1_ENSG00000266372;NYAP1_ENSG00000166924                                      |
| 7 | 100086991 | 1E+08    | KD2-H4K8ac_peak_26853 | 5.01002  |                                                                                       |
| 7 | 100087842 | 1E+08    | KD2-H4K8ac_peak_26854 | 5.59859  |                                                                                       |
| 7 | 100113660 | 1E+08    | KD2-H4K8ac_peak_26855 | 4.68059  |                                                                                       |
| 7 | 100136950 | 1E+08    | KD2-H4K8ac_peak_26856 | 4.03256  | AGFG2_ENSG00000106351                                                                 |
| 7 | 100167490 | 1E+08    | KD2-H4K8ac_peak_26857 | 13.22091 | RP11-44M6.3_ENSG00000184414                                                           |
| 7 | 100183462 | 1E+08    | KD2-H4K8ac_peak_26858 | 26.88076 | LRCH4_ENSG00000077454                                                                 |
| 7 | 100184311 | 1E+08    | KD2-H4K8ac_peak_26859 | 9.34195  | LRCH4_ENSG00000077454                                                                 |
| 7 | 100199700 | 1E+08    | KD2-H4K8ac_peak_26860 | 21.2844  | PCOLCE_ENSG00000106333                                                                |
| 7 | 100201386 | 1E+08    | KD2-H4K8ac_peak_26861 | 9.57101  | PCOLCE-AS1_ENSG00000224729                                                            |
| 7 | 100202097 | 1E+08    | KD2-H4K8ac_peak_26862 | 7.36799  | PCOLCE-AS1_ENSG00000224729                                                            |

|   |           |          |                       |          |                                               |
|---|-----------|----------|-----------------------|----------|-----------------------------------------------|
| 7 | 100208998 | 1E+08    | KD2-H4K8ac_peak_26863 | 14.68449 | MOSPD3_ENSG00000106330                        |
| 7 | 100224460 | 1E+08    | KD2-H4K8ac_peak_26864 | 8.86099  |                                               |
| 7 | 100230568 | 1E+08    | KD2-H4K8ac_peak_26865 | 12.68179 |                                               |
| 7 | 100231454 | 1E+08    | KD2-H4K8ac_peak_26866 | 10.93597 |                                               |
| 7 | 100254441 | 1E+08    | KD2-H4K8ac_peak_26867 | 6.55628  | ACTL6B_ENSG00000077080                        |
| 7 | 100270633 | 1E+08    | KD2-H4K8ac_peak_26868 | 5.85291  | GNB2_ENSG00000172354                          |
| 7 | 100271149 | 1E+08    | KD2-H4K8ac_peak_26869 | 16.67374 | GNB2_ENSG00000172354                          |
| 7 | 100273291 | 1E+08    | KD2-H4K8ac_peak_26870 | 8.10216  |                                               |
| 7 | 100291250 | 1E+08    | KD2-H4K8ac_peak_26871 | 9.63487  |                                               |
| 7 | 100292203 | 1E+08    | KD2-H4K8ac_peak_26872 | 13.12288 |                                               |
| 7 | 100303207 | 1E+08    | KD2-H4K8ac_peak_26873 | 11.7608  | POP7_ENSG00000172336                          |
| 7 | 100399615 | 1E+08    | KD2-H4K8ac_peak_26874 | 6.52179  |                                               |
| 7 | 100400690 | 1E+08    | KD2-H4K8ac_peak_26875 | 13.77586 |                                               |
| 7 | 100424536 | 1E+08    | KD2-H4K8ac_peak_26876 | 10.63306 | EPHB4_ENSG00000196411;SLC12A9_ENSG00000146828 |
| 7 | 100425427 | 1E+08    | KD2-H4K8ac_peak_26877 | 10.40376 | EPHB4_ENSG00000196411;SLC12A9_ENSG00000146828 |
| 7 | 100450365 | 1E+08    | KD2-H4K8ac_peak_26878 | 17.75813 | RP11-126L15.4_ENSG00000236305                 |
| 7 | 100471587 | 1E+08    | KD2-H4K8ac_peak_26879 | 19.77698 | SRRT_ENSG00000087087                          |
| 7 | 100472787 | 1E+08    | KD2-H4K8ac_peak_26880 | 18.37277 | SRRT_ENSG00000087087                          |
| 7 | 100486773 | 1E+08    | KD2-H4K8ac_peak_26881 | 8.4716   | UFSP1_ENSG00000176125                         |
| 7 | 100487572 | 1E+08    | KD2-H4K8ac_peak_26882 | 16.81258 | UFSP1_ENSG00000176125                         |
| 7 | 100492464 | 1E+08    | KD2-H4K8ac_peak_26883 | 5.9696   |                                               |
| 7 | 100494418 | 1E+08    | KD2-H4K8ac_peak_26884 | 7.76104  | ACHE_ENSG00000087085                          |
| 7 | 100660638 | 1.01E+08 | KD2-H4K8ac_peak_26885 | 11.05407 | RP11-395B7.4_ENSG00000227053                  |
| 7 | 100781059 | 1.01E+08 | KD2-H4K8ac_peak_26886 | 11.79585 |                                               |
| 7 | 100787078 | 1.01E+08 | KD2-H4K8ac_peak_26887 | 10.96455 |                                               |
| 7 | 100797125 | 1.01E+08 | KD2-H4K8ac_peak_26888 | 8.7577   | AP1S1_ENSG00000106367                         |
| 7 | 100798069 | 1.01E+08 | KD2-H4K8ac_peak_26889 | 8.03078  | AP1S1_ENSG00000106367                         |
| 7 | 100805741 | 1.01E+08 | KD2-H4K8ac_peak_26890 | 12.93209 |                                               |
| 7 | 100809219 | 1.01E+08 | KD2-H4K8ac_peak_26891 | 11.90187 | VGF_ENSG00000128564                           |
| 7 | 100810267 | 1.01E+08 | KD2-H4K8ac_peak_26892 | 9.90914  |                                               |
| 7 | 100822401 | 1.01E+08 | KD2-H4K8ac_peak_26893 | 6.85193  | NAT16_ENSG00000167011                         |
| 7 | 100823081 | 1.01E+08 | KD2-H4K8ac_peak_26894 | 15.20126 | NAT16_ENSG00000167011                         |
| 7 | 100836030 | 1.01E+08 | KD2-H4K8ac_peak_26895 | 6.40297  |                                               |
| 7 | 100859887 | 1.01E+08 | KD2-H4K8ac_peak_26896 | 19.2963  | PLOD3_ENSG00000106397;ZNHIT1_ENSG00000106400  |
| 7 | 100887725 | 1.01E+08 | KD2-H4K8ac_peak_26897 | 8.56962  |                                               |
| 7 | 100888514 | 1.01E+08 | KD2-H4K8ac_peak_26898 | 7.73264  |                                               |
| 7 | 100926027 | 1.01E+08 | KD2-H4K8ac_peak_26899 | 8.28234  |                                               |
| 7 | 100951721 | 1.01E+08 | KD2-H4K8ac_peak_26900 | 5.81188  | RP11-132A1.4_ENSG00000232445                  |
| 7 | 100964823 | 1.01E+08 | KD2-H4K8ac_peak_26901 | 22.0091  | RABL5_ENSG00000128581                         |
| 7 | 100973389 | 1.01E+08 | KD2-H4K8ac_peak_26902 | 6.25869  |                                               |
| 7 | 101006134 | 1.01E+08 | KD2-H4K8ac_peak_26903 | 8.10216  | COL26A1_ENSG00000160963                       |
| 7 | 101006991 | 1.01E+08 | KD2-H4K8ac_peak_26904 | 8.0287   | COL26A1_ENSG00000160963                       |
| 7 | 101034036 | 1.01E+08 | KD2-H4K8ac_peak_26905 | 9.402    |                                               |
| 7 | 101129237 | 1.01E+08 | KD2-H4K8ac_peak_26906 | 10.53377 |                                               |
| 7 | 101130164 | 1.01E+08 | KD2-H4K8ac_peak_26907 | 11.90231 |                                               |
| 7 | 101150679 | 1.01E+08 | KD2-H4K8ac_peak_26908 | 11.24702 |                                               |

|   |           |          |                       |          |                                                                      |
|---|-----------|----------|-----------------------|----------|----------------------------------------------------------------------|
| 7 | 101185834 | 1.01E+08 | KD2-H4K8ac_peak_26909 | 3.97079  |                                                                      |
| 7 | 101386461 | 1.01E+08 | KD2-H4K8ac_peak_26910 | 9.26408  |                                                                      |
| 7 | 101458438 | 1.01E+08 | KD2-H4K8ac_peak_26911 | 7.73264  | CUX1_ENSG00000257923                                                 |
| 7 | 101459140 | 1.01E+08 | KD2-H4K8ac_peak_26912 | 14.8083  | CUX1_ENSG00000257923                                                 |
| 7 | 101687543 | 1.02E+08 | KD2-H4K8ac_peak_26913 | 9.95119  |                                                                      |
| 7 | 101688019 | 1.02E+08 | KD2-H4K8ac_peak_26914 | 17.84477 |                                                                      |
| 7 | 101707174 | 1.02E+08 | KD2-H4K8ac_peak_26915 | 8.10216  |                                                                      |
| 7 | 101904186 | 1.02E+08 | KD2-H4K8ac_peak_26916 | 4.06758  |                                                                      |
| 7 | 101913187 | 1.02E+08 | KD2-H4K8ac_peak_26917 | 8.16906  |                                                                      |
| 7 | 101929052 | 1.02E+08 | KD2-H4K8ac_peak_26918 | 5.75757  | SH2B2_ENSG00000160999                                                |
| 7 | 101929600 | 1.02E+08 | KD2-H4K8ac_peak_26919 | 44.39921 |                                                                      |
| 7 | 101930230 | 1.02E+08 | KD2-H4K8ac_peak_26920 | 18.54875 |                                                                      |
| 7 | 102003502 | 1.02E+08 | KD2-H4K8ac_peak_26921 | 13.13969 | PRKRIP1_ENSG00000128563;RP11-163E9.2_ENSG00000239969                 |
| 7 | 102004376 | 1.02E+08 | KD2-H4K8ac_peak_26922 | 13.75238 | PRKRIP1_ENSG00000128563;RP11-163E9.2_ENSG00000239969                 |
| 7 | 102036317 | 1.02E+08 | KD2-H4K8ac_peak_26923 | 30.35433 |                                                                      |
| 7 | 102073146 | 1.02E+08 | KD2-H4K8ac_peak_26924 | 12.57865 | RP11-514P8.2_ENSG00000239480;ORAI2_ENSG00000160991                   |
| 7 | 102080781 | 1.02E+08 | KD2-H4K8ac_peak_26925 | 7.34308  |                                                                      |
| 7 | 102081405 | 1.02E+08 | KD2-H4K8ac_peak_26926 | 9.6247   |                                                                      |
| 7 | 102082529 | 1.02E+08 | KD2-H4K8ac_peak_26927 | 12.40345 |                                                                      |
| 7 | 102083099 | 1.02E+08 | KD2-H4K8ac_peak_26928 | 5.88845  |                                                                      |
| 7 | 102104849 | 1.02E+08 | KD2-H4K8ac_peak_26929 | 11.86355 | MIR5090_ENSG00000266715;ALKBH4_ENSG00000160993;LRWD1_ENSG00000161036 |
| 7 | 102105510 | 1.02E+08 | KD2-H4K8ac_peak_26930 | 11.04256 | MIR5090_ENSG00000266715;ALKBH4_ENSG00000160993;LRWD1_ENSG00000161036 |
| 7 | 102119115 | 1.02E+08 | KD2-H4K8ac_peak_26931 | 10.0692  | POLR2J_ENSG00000005075                                               |
| 7 | 102153379 | 1.02E+08 | KD2-H4K8ac_peak_26932 | 17.97055 |                                                                      |
| 7 | 102165356 | 1.02E+08 | KD2-H4K8ac_peak_26933 | 14.8083  |                                                                      |
| 7 | 102172627 | 1.02E+08 | KD2-H4K8ac_peak_26934 | 10.66719 |                                                                      |
| 7 | 102212685 | 1.02E+08 | KD2-H4K8ac_peak_26935 | 24.78684 | POLR2J3_ENSG00000168255                                              |
| 7 | 102252511 | 1.02E+08 | KD2-H4K8ac_peak_26936 | 11.50346 |                                                                      |
| 7 | 102272401 | 1.02E+08 | KD2-H4K8ac_peak_26937 | 32.7515  |                                                                      |
| 7 | 102389664 | 1.02E+08 | KD2-H4K8ac_peak_26938 | 8.88082  | FAM185A_ENSG00000222011                                              |
| 7 | 102715357 | 1.03E+08 | KD2-H4K8ac_peak_26939 | 15.74985 | FBXL13_ENSG00000161040;ARMC10_ENSG00000170632                        |
| 7 | 102789298 | 1.03E+08 | KD2-H4K8ac_peak_26940 | 22.92963 | NAPEPLD_ENSG00000161048                                              |
| 7 | 102920217 | 1.03E+08 | KD2-H4K8ac_peak_26941 | 19.33018 | DPY19L2P2_ENSG00000170629                                            |
| 7 | 102937044 | 1.03E+08 | KD2-H4K8ac_peak_26942 | 9.73818  | PMPCB_ENSG00000105819                                                |
| 7 | 102937954 | 1.03E+08 | KD2-H4K8ac_peak_26943 | 6.40874  | PMPCB_ENSG00000105819                                                |
| 7 | 102984828 | 1.03E+08 | KD2-H4K8ac_peak_26944 | 13.22091 | DNAJC2_ENSG00000105821;PSMC2_ENSG00000161057                         |
| 7 | 102987512 | 1.03E+08 | KD2-H4K8ac_peak_26945 | 5.04587  |                                                                      |
| 7 | 103085882 | 1.03E+08 | KD2-H4K8ac_peak_26946 | 12.37731 | SLC26A5_ENSG00000170615;CTB-107G13.1_ENSG00000234715                 |
| 7 | 103354798 | 1.03E+08 | KD2-H4K8ac_peak_26947 | 4.78225  |                                                                      |
| 7 | 103356221 | 1.03E+08 | KD2-H4K8ac_peak_26948 | 9.63487  |                                                                      |
| 7 | 103497709 | 1.03E+08 | KD2-H4K8ac_peak_26949 | 5.15777  |                                                                      |
| 7 | 103629033 | 1.04E+08 | KD2-H4K8ac_peak_26950 | 7.07117  | RELN_ENSG00000189056                                                 |
| 7 | 103629839 | 1.04E+08 | KD2-H4K8ac_peak_26951 | 15.96141 | RELN_ENSG00000189056                                                 |
| 7 | 103848636 | 1.04E+08 | KD2-H4K8ac_peak_26952 | 14.80472 | ORC5_ENSG00000164815                                                 |
| 7 | 103968780 | 1.04E+08 | KD2-H4K8ac_peak_26953 | 9.90914  | LHFPL3_ENSG00000187416                                               |
| 7 | 104262509 | 1.04E+08 | KD2-H4K8ac_peak_26954 | 4.77079  |                                                                      |

|   |           |          |                       |          |                                                                           |
|---|-----------|----------|-----------------------|----------|---------------------------------------------------------------------------|
| 7 | 104624087 | 1.05E+08 | KD2-H4K8ac_peak_26955 | 6.31838  |                                                                           |
| 7 | 104653784 | 1.05E+08 | KD2-H4K8ac_peak_26956 | 23.44586 | LINC01004_ENSG00000228393;KMT2E-AS1_ENSG00000239569;KMT2E_ENSG00000005483 |
| 7 | 105029629 | 1.05E+08 | KD2-H4K8ac_peak_26957 | 13.73635 |                                                                           |
| 7 | 105162120 | 1.05E+08 | KD2-H4K8ac_peak_26958 | 13.95627 | PUS7_ENSG00000091127                                                      |
| 7 | 105163014 | 1.05E+08 | KD2-H4K8ac_peak_26959 | 10.45683 | PUS7_ENSG00000091127                                                      |
| 7 | 105171529 | 1.05E+08 | KD2-H4K8ac_peak_26960 | 5.65317  | RP11-251G23.2_ENSG00000223886;RINT1_ENSG00000135249                       |
| 7 | 105172696 | 1.05E+08 | KD2-H4K8ac_peak_26961 | 14.84673 | RINT1_ENSG00000135249                                                     |
| 7 | 105494529 | 1.05E+08 | KD2-H4K8ac_peak_26962 | 6.66692  |                                                                           |
| 7 | 105516507 | 1.06E+08 | KD2-H4K8ac_peak_26963 | 7.24717  | ATXN7L1_ENSG00000146776;CDHR3_ENSG00000128536                             |
| 7 | 105517317 | 1.06E+08 | KD2-H4K8ac_peak_26964 | 11.50346 | ATXN7L1_ENSG00000146776;CDHR3_ENSG00000128536                             |
| 7 | 105661215 | 1.06E+08 | KD2-H4K8ac_peak_26965 | 7.167    |                                                                           |
| 7 | 105661720 | 1.06E+08 | KD2-H4K8ac_peak_26966 | 6.65673  |                                                                           |
| 7 | 105698584 | 1.06E+08 | KD2-H4K8ac_peak_26967 | 8.36432  |                                                                           |
| 7 | 105705301 | 1.06E+08 | KD2-H4K8ac_peak_26968 | 13.27675 |                                                                           |
| 7 | 105711887 | 1.06E+08 | KD2-H4K8ac_peak_26969 | 8.85813  |                                                                           |
| 7 | 105752117 | 1.06E+08 | KD2-H4K8ac_peak_26970 | 13.70605 | SYPL1_ENSG00000008282                                                     |
| 7 | 105753010 | 1.06E+08 | KD2-H4K8ac_peak_26971 | 8.16906  | SYPL1_ENSG00000008282                                                     |
| 7 | 105924717 | 1.06E+08 | KD2-H4K8ac_peak_26972 | 7.95563  | RP11-22N19.2_ENSG00000273320                                              |
| 7 | 105925800 | 1.06E+08 | KD2-H4K8ac_peak_26973 | 6.66359  | NAMPT_ENSG00000105835;RP11-22N19.2_ENSG00000273320                        |
| 7 | 106207929 | 1.06E+08 | KD2-H4K8ac_peak_26974 | 6.66692  |                                                                           |
| 7 | 106209912 | 1.06E+08 | KD2-H4K8ac_peak_26975 | 7.12213  |                                                                           |
| 7 | 106210540 | 1.06E+08 | KD2-H4K8ac_peak_26976 | 8.55271  |                                                                           |
| 7 | 106211756 | 1.06E+08 | KD2-H4K8ac_peak_26977 | 8.30974  |                                                                           |
| 7 | 106239121 | 1.06E+08 | KD2-H4K8ac_peak_26978 | 8.16906  | CTB-30L5.1_ENSG00000267052                                                |
| 7 | 106239626 | 1.06E+08 | KD2-H4K8ac_peak_26979 | 13.56049 | CTB-30L5.1_ENSG00000267052                                                |
| 7 | 106300381 | 1.06E+08 | KD2-H4K8ac_peak_26980 | 15.39448 | CCDC71L_ENSG00000253276;AC004917.1_ENSG00000177820                        |
| 7 | 106301790 | 1.06E+08 | KD2-H4K8ac_peak_26981 | 5.38498  | CCDC71L_ENSG00000253276;AC004917.1_ENSG00000177820                        |
| 7 | 106685264 | 1.07E+08 | KD2-H4K8ac_peak_26982 | 6.40874  | PRKAR2B_ENSG00000005249                                                   |
| 7 | 106709531 | 1.07E+08 | KD2-H4K8ac_peak_26983 | 7.27716  |                                                                           |
| 7 | 107027082 | 1.07E+08 | KD2-H4K8ac_peak_26984 | 4.89305  |                                                                           |
| 7 | 107028614 | 1.07E+08 | KD2-H4K8ac_peak_26985 | 6.69962  |                                                                           |
| 7 | 107204082 | 1.07E+08 | KD2-H4K8ac_peak_26986 | 25.34026 | COG5_ENSG00000164597;DUS4L_ENSG00000105865                                |
| 7 | 107205905 | 1.07E+08 | KD2-H4K8ac_peak_26987 | 5.45396  | COG5_ENSG00000164597                                                      |
| 7 | 107220457 | 1.07E+08 | KD2-H4K8ac_peak_26988 | 13.97093 | RP4-593H12.1_ENSG00000272854;BCAP29_ENSG00000075790                       |
| 7 | 107247380 | 1.07E+08 | KD2-H4K8ac_peak_26989 | 3.75035  |                                                                           |
| 7 | 107383392 | 1.07E+08 | KD2-H4K8ac_peak_26990 | 7.0754   | CBLL1_ENSG00000105879                                                     |
| 7 | 107384275 | 1.07E+08 | KD2-H4K8ac_peak_26991 | 10.09705 | AC002467.7_ENSG00000241764;CBLL1_ENSG00000105879                          |
| 7 | 107531628 | 1.08E+08 | KD2-H4K8ac_peak_26992 | 11.05467 | DLD_ENSG00000091140                                                       |
| 7 | 107641945 | 1.08E+08 | KD2-H4K8ac_peak_26993 | 17.97055 | LAMB1_ENSG00000091136                                                     |
| 7 | 107652006 | 1.08E+08 | KD2-H4K8ac_peak_26994 | 8.59301  |                                                                           |
| 7 | 107734434 | 1.08E+08 | KD2-H4K8ac_peak_26995 | 4.211    |                                                                           |
| 7 | 107878758 | 1.08E+08 | KD2-H4K8ac_peak_26996 | 5.1313   |                                                                           |
| 7 | 107922064 | 1.08E+08 | KD2-H4K8ac_peak_26997 | 8.90387  |                                                                           |
| 7 | 107933087 | 1.08E+08 | KD2-H4K8ac_peak_26998 | 4.8888   |                                                                           |
| 7 | 108056038 | 1.08E+08 | KD2-H4K8ac_peak_26999 | 5.14125  |                                                                           |
| 7 | 108095426 | 1.08E+08 | KD2-H4K8ac_peak_27000 | 9.08816  | NRCAM_ENSG00000091129                                                     |

|   |           |          |                       |          |                                                                     |
|---|-----------|----------|-----------------------|----------|---------------------------------------------------------------------|
| 7 | 108166327 | 1.08E+08 | KD2-H4K8ac_peak_27001 | 14.275   |                                                                     |
| 7 | 108166973 | 1.08E+08 | KD2-H4K8ac_peak_27002 | 12.82393 |                                                                     |
| 7 | 108209736 | 1.08E+08 | KD2-H4K8ac_peak_27003 | 10.66719 | PNPLA8_ENSG00000135241;THAP5_ENSG00000177683;DNAJB9_ENSG00000128590 |
| 7 | 108210512 | 1.08E+08 | KD2-H4K8ac_peak_27004 | 4.84794  | PNPLA8_ENSG00000135241;THAP5_ENSG00000177683;DNAJB9_ENSG00000128590 |
| 7 | 108613624 | 1.09E+08 | KD2-H4K8ac_peak_27005 | 4.44748  |                                                                     |
| 7 | 110062703 | 1.1E+08  | KD2-H4K8ac_peak_27006 | 9.05418  |                                                                     |
| 7 | 110082144 | 1.1E+08  | KD2-H4K8ac_peak_27007 | 4.3015   |                                                                     |
| 7 | 110163023 | 1.1E+08  | KD2-H4K8ac_peak_27008 | 6.53915  |                                                                     |
| 7 | 110173861 | 1.1E+08  | KD2-H4K8ac_peak_27009 | 5.61067  | AC003088.1_ENSG00000226965                                          |
| 7 | 110624842 | 1.11E+08 | KD2-H4K8ac_peak_27010 | 8.75125  |                                                                     |
| 7 | 110743927 | 1.11E+08 | KD2-H4K8ac_peak_27011 | 6.16888  |                                                                     |
| 7 | 110777941 | 1.11E+08 | KD2-H4K8ac_peak_27012 | 7.47462  |                                                                     |
| 7 | 111201859 | 1.11E+08 | KD2-H4K8ac_peak_27013 | 21.11201 | IMMP2L_ENSG00000184903                                              |
| 7 | 111291462 | 1.11E+08 | KD2-H4K8ac_peak_27014 | 3.90565  |                                                                     |
| 7 | 111663139 | 1.12E+08 | KD2-H4K8ac_peak_27015 | 8.5092   |                                                                     |
| 7 | 111845960 | 1.12E+08 | KD2-H4K8ac_peak_27016 | 7.76104  | DOCK4_ENSG00000128512;ZNF277_ENSG00000198839                        |
| 7 | 111920710 | 1.12E+08 | KD2-H4K8ac_peak_27017 | 5.3778   |                                                                     |
| 7 | 112031765 | 1.12E+08 | KD2-H4K8ac_peak_27018 | 12.82393 |                                                                     |
| 7 | 112090016 | 1.12E+08 | KD2-H4K8ac_peak_27019 | 9.95759  |                                                                     |
| 7 | 112091140 | 1.12E+08 | KD2-H4K8ac_peak_27020 | 10.73134 |                                                                     |
| 7 | 112430086 | 1.12E+08 | KD2-H4K8ac_peak_27021 | 21.9832  | TMEM168_ENSG00000146802                                             |
| 7 | 112580293 | 1.13E+08 | KD2-H4K8ac_peak_27022 | 6.13177  | C7orf60_ENSG00000164603                                             |
| 7 | 112726672 | 1.13E+08 | KD2-H4K8ac_peak_27023 | 3.75035  | GPR85_ENSG00000164604                                               |
| 7 | 112739499 | 1.13E+08 | KD2-H4K8ac_peak_27024 | 6.47635  | RP11-736E3.1_ENSG00000225457                                        |
| 7 | 115850666 | 1.16E+08 | KD2-H4K8ac_peak_27025 | 19.5643  | TES_ENSG00000135269                                                 |
| 7 | 116364112 | 1.16E+08 | KD2-H4K8ac_peak_27026 | 6.16888  |                                                                     |
| 7 | 116502638 | 1.17E+08 | KD2-H4K8ac_peak_27027 | 25.38732 |                                                                     |
| 7 | 116570248 | 1.17E+08 | KD2-H4K8ac_peak_27028 | 8.02571  |                                                                     |
| 7 | 116593029 | 1.17E+08 | KD2-H4K8ac_peak_27029 | 21.2844  | ST7-AS1_ENSG00000227199;ST7_ENSG00000004866;ST7-OT4_ENSG00000214188 |
| 7 | 116653643 | 1.17E+08 | KD2-H4K8ac_peak_27030 | 6.98292  |                                                                     |
| 7 | 117824196 | 1.18E+08 | KD2-H4K8ac_peak_27031 | 19.25648 | NAA38_ENSG00000128534                                               |
| 7 | 117829495 | 1.18E+08 | KD2-H4K8ac_peak_27032 | 5.73839  |                                                                     |
| 7 | 117854050 | 1.18E+08 | KD2-H4K8ac_peak_27033 | 24.19623 | ANKRD7_ENSG00000106013                                              |
| 7 | 118464890 | 1.18E+08 | KD2-H4K8ac_peak_27034 | 6.31143  |                                                                     |
| 7 | 118467641 | 1.18E+08 | KD2-H4K8ac_peak_27035 | 6.64891  |                                                                     |
| 7 | 118497796 | 1.18E+08 | KD2-H4K8ac_peak_27036 | 6.31143  |                                                                     |
| 7 | 118498974 | 1.18E+08 | KD2-H4K8ac_peak_27037 | 8.88549  |                                                                     |
| 7 | 118501590 | 1.19E+08 | KD2-H4K8ac_peak_27038 | 7.47462  |                                                                     |
| 7 | 120663559 | 1.21E+08 | KD2-H4K8ac_peak_27039 | 8.94469  |                                                                     |
| 7 | 120945817 | 1.21E+08 | KD2-H4K8ac_peak_27040 | 8.55271  |                                                                     |
| 7 | 121036002 | 1.21E+08 | KD2-H4K8ac_peak_27041 | 15.66774 | FAM3C_ENSG00000196937                                               |
| 7 | 121783983 | 1.22E+08 | KD2-H4K8ac_peak_27042 | 5.14125  | AASS_ENSG00000008311                                                |
| 7 | 122995969 | 1.23E+08 | KD2-H4K8ac_peak_27043 | 7.13615  |                                                                     |
| 7 | 123167877 | 1.23E+08 | KD2-H4K8ac_peak_27044 | 16.57619 |                                                                     |
| 7 | 123172867 | 1.23E+08 | KD2-H4K8ac_peak_27045 | 8.16906  |                                                                     |
| 7 | 123283969 | 1.23E+08 | KD2-H4K8ac_peak_27046 | 6.2781   |                                                                     |



|   |           |          |                       |          |                                                       |
|---|-----------|----------|-----------------------|----------|-------------------------------------------------------|
| 7 | 123388490 | 1.23E+08 | KD2-H4K8ac_peak_27047 | 14.68449 | WASL_ENSG00000106299;RP11-390E23.6_ENSG00000272686    |
| 7 | 123389346 | 1.23E+08 | KD2-H4K8ac_peak_27048 | 8.86099  | WASL_ENSG00000106299;RP11-390E23.6_ENSG00000272686    |
| 7 | 123512573 | 1.24E+08 | KD2-H4K8ac_peak_27049 | 5.51783  |                                                       |
| 7 | 123671021 | 1.24E+08 | KD2-H4K8ac_peak_27050 | 4.68932  | RP5-921G16.1_ENSG00000242593                          |
| 7 | 123671954 | 1.24E+08 | KD2-H4K8ac_peak_27051 | 27.10442 | TMEM229A_ENSG00000234224;RP5-921G16.1_ENSG00000242593 |
| 7 | 123676374 | 1.24E+08 | KD2-H4K8ac_peak_27052 | 5.75452  |                                                       |
| 7 | 123682589 | 1.24E+08 | KD2-H4K8ac_peak_27053 | 6.40683  |                                                       |
| 7 | 123713417 | 1.24E+08 | KD2-H4K8ac_peak_27054 | 8.84031  |                                                       |
| 7 | 123717868 | 1.24E+08 | KD2-H4K8ac_peak_27055 | 7.65815  |                                                       |
| 7 | 123719206 | 1.24E+08 | KD2-H4K8ac_peak_27056 | 6.66692  |                                                       |
| 7 | 123722448 | 1.24E+08 | KD2-H4K8ac_peak_27057 | 6.40874  |                                                       |
| 7 | 123724718 | 1.24E+08 | KD2-H4K8ac_peak_27058 | 16.18205 |                                                       |
| 7 | 123725670 | 1.24E+08 | KD2-H4K8ac_peak_27059 | 4.8888   |                                                       |
| 7 | 123726129 | 1.24E+08 | KD2-H4K8ac_peak_27060 | 7.89389  |                                                       |
| 7 | 124440824 | 1.24E+08 | KD2-H4K8ac_peak_27061 | 9.89126  |                                                       |
| 7 | 125106224 | 1.25E+08 | KD2-H4K8ac_peak_27062 | 9.11031  |                                                       |
| 7 | 125107180 | 1.25E+08 | KD2-H4K8ac_peak_27063 | 5.88845  |                                                       |
| 7 | 126479701 | 1.26E+08 | KD2-H4K8ac_peak_27064 | 5.45396  |                                                       |
| 7 | 126893618 | 1.27E+08 | KD2-H4K8ac_peak_27065 | 9.20193  | GRM8_ENSG00000179603                                  |
| 7 | 127031765 | 1.27E+08 | KD2-H4K8ac_peak_27066 | 6.84261  |                                                       |
| 7 | 127032943 | 1.27E+08 | KD2-H4K8ac_peak_27067 | 14.59156 |                                                       |
| 7 | 127225178 | 1.27E+08 | KD2-H4K8ac_peak_27068 | 19.93398 |                                                       |
| 7 | 127227899 | 1.27E+08 | KD2-H4K8ac_peak_27069 | 21.01976 | ARF5_ENSG00000004059                                  |
| 7 | 127228496 | 1.27E+08 | KD2-H4K8ac_peak_27070 | 27.46477 | ARF5_ENSG00000004059                                  |
| 7 | 127291013 | 1.27E+08 | KD2-H4K8ac_peak_27071 | 15.69572 | AC073934.6_ENSG00000240790;SND1_ENSG00000197157       |
| 7 | 127292279 | 1.27E+08 | KD2-H4K8ac_peak_27072 | 11.83301 | AC073934.6_ENSG00000240790;SND1_ENSG00000197157       |
| 7 | 127671937 | 1.28E+08 | KD2-H4K8ac_peak_27073 | 3.83717  | LRRC4_ENSG00000128594                                 |
| 7 | 127672522 | 1.28E+08 | KD2-H4K8ac_peak_27074 | 8.10216  | LRRC4_ENSG00000128594                                 |
| 7 | 127723859 | 1.28E+08 | KD2-H4K8ac_peak_27075 | 10.29842 |                                                       |
| 7 | 127725826 | 1.28E+08 | KD2-H4K8ac_peak_27076 | 11.28765 |                                                       |
| 7 | 127775399 | 1.28E+08 | KD2-H4K8ac_peak_27077 | 12.57865 |                                                       |
| 7 | 127775991 | 1.28E+08 | KD2-H4K8ac_peak_27078 | 16.49944 |                                                       |
| 7 | 127806682 | 1.28E+08 | KD2-H4K8ac_peak_27079 | 16.54484 |                                                       |
| 7 | 127807759 | 1.28E+08 | KD2-H4K8ac_peak_27080 | 12.08081 |                                                       |
| 7 | 127863058 | 1.28E+08 | KD2-H4K8ac_peak_27081 | 4.67342  |                                                       |
| 7 | 127904771 | 1.28E+08 | KD2-H4K8ac_peak_27082 | 7.57336  | RP11-62J1.4_ENSG00000272915                           |
| 7 | 127906042 | 1.28E+08 | KD2-H4K8ac_peak_27083 | 10.29842 |                                                       |
| 7 | 127906638 | 1.28E+08 | KD2-H4K8ac_peak_27084 | 9.12047  |                                                       |
| 7 | 127983700 | 1.28E+08 | KD2-H4K8ac_peak_27085 | 7.90806  | RBM28_ENSG00000106344;RNU7-27P_ENSG00000238750        |
| 7 | 127988830 | 1.28E+08 | KD2-H4K8ac_peak_27086 | 5.01002  |                                                       |
| 7 | 127989405 | 1.28E+08 | KD2-H4K8ac_peak_27087 | 6.89152  |                                                       |
| 7 | 127995712 | 1.28E+08 | KD2-H4K8ac_peak_27088 | 13.51987 |                                                       |
| 7 | 127996897 | 1.28E+08 | KD2-H4K8ac_peak_27089 | 10.40889 |                                                       |
| 7 | 127997704 | 1.28E+08 | KD2-H4K8ac_peak_27090 | 20.5508  |                                                       |
| 7 | 127999311 | 1.28E+08 | KD2-H4K8ac_peak_27091 | 24.3087  | PRRT4_ENSG00000224940                                 |
| 7 | 128002556 | 1.28E+08 | KD2-H4K8ac_peak_27092 | 10.35678 | PRRT4_ENSG00000224940                                 |

|   |           |          |                       |          |                                                                                   |
|---|-----------|----------|-----------------------|----------|-----------------------------------------------------------------------------------|
| 7 | 128004222 | 1.28E+08 | KD2-H4K8ac_peak_27093 | 5.9696   |                                                                                   |
| 7 | 128006226 | 1.28E+08 | KD2-H4K8ac_peak_27094 | 3.90565  |                                                                                   |
| 7 | 128018493 | 1.28E+08 | KD2-H4K8ac_peak_27095 | 14.4458  |                                                                                   |
| 7 | 128019639 | 1.28E+08 | KD2-H4K8ac_peak_27096 | 4.33139  |                                                                                   |
| 7 | 128020188 | 1.28E+08 | KD2-H4K8ac_peak_27097 | 10.44656 |                                                                                   |
| 7 | 128027181 | 1.28E+08 | KD2-H4K8ac_peak_27098 | 10.70427 |                                                                                   |
| 7 | 128029519 | 1.28E+08 | KD2-H4K8ac_peak_27099 | 6.11728  |                                                                                   |
| 7 | 128045190 | 1.28E+08 | KD2-H4K8ac_peak_27100 | 8.85813  |                                                                                   |
| 7 | 128049442 | 1.28E+08 | KD2-H4K8ac_peak_27101 | 6.28103  | IMPDH1_ENSG00000106348                                                            |
| 7 | 128094318 | 1.28E+08 | KD2-H4K8ac_peak_27102 | 18.55613 |                                                                                   |
| 7 | 128095366 | 1.28E+08 | KD2-H4K8ac_peak_27103 | 11.03268 | RP11-212P7.3_ENSG00000273184;HILPDA_ENSG00000135245;RP11-155G14.6_ENSG00000240758 |
| 7 | 128095976 | 1.28E+08 | KD2-H4K8ac_peak_27104 | 13.65567 | RP11-212P7.3_ENSG00000273184;HILPDA_ENSG00000135245;RP11-155G14.6_ENSG00000240758 |
| 7 | 128116278 | 1.28E+08 | KD2-H4K8ac_peak_27105 | 16.8435  | METTL2B_ENSG00000165055                                                           |
| 7 | 128170526 | 1.28E+08 | KD2-H4K8ac_peak_27106 | 10.92268 | RP11-212P7.2_ENSG00000273270;RP11-274B21.1_ENSG00000242588                        |
| 7 | 128171444 | 1.28E+08 | KD2-H4K8ac_peak_27107 | 17.69527 | RP11-212P7.2_ENSG00000273270;RP11-274B21.1_ENSG00000242588                        |
| 7 | 128337194 | 1.28E+08 | KD2-H4K8ac_peak_27108 | 9.1707   | RNA5SP242_ENSG00000201041;RNA5SP243_ENSG00000252866                               |
| 7 | 128378727 | 1.28E+08 | KD2-H4K8ac_peak_27109 | 7.18615  | CALU_ENSG00000128595                                                              |
| 7 | 128423159 | 1.28E+08 | KD2-H4K8ac_peak_27110 | 12.79505 |                                                                                   |
| 7 | 128430392 | 1.28E+08 | KD2-H4K8ac_peak_27111 | 5.4919   | CCDC136_ENSG00000128596                                                           |
| 7 | 128430826 | 1.28E+08 | KD2-H4K8ac_peak_27112 | 15.2334  | CCDC136_ENSG00000128596                                                           |
| 7 | 128431597 | 1.28E+08 | KD2-H4K8ac_peak_27113 | 14.03283 | CCDC136_ENSG00000128596                                                           |
| 7 | 128470016 | 1.28E+08 | KD2-H4K8ac_peak_27114 | 8.86099  | FLNC_ENSG00000128591                                                              |
| 7 | 128471294 | 1.28E+08 | KD2-H4K8ac_peak_27115 | 21.2178  | FLNC_ENSG00000128591                                                              |
| 7 | 128473941 | 1.28E+08 | KD2-H4K8ac_peak_27116 | 8.13779  |                                                                                   |
| 7 | 128502024 | 1.29E+08 | KD2-H4K8ac_peak_27117 | 20.02161 | RP11-309L24.2_ENSG00000242902;ATP6V1F_ENSG00000128524                             |
| 7 | 128503057 | 1.29E+08 | KD2-H4K8ac_peak_27118 | 5.59859  | RP11-309L24.2_ENSG00000242902;ATP6V1F_ENSG00000128524                             |
| 7 | 128509507 | 1.29E+08 | KD2-H4K8ac_peak_27119 | 13.70605 | RP11-309L24.9_ENSG00000272899                                                     |
| 7 | 128550095 | 1.29E+08 | KD2-H4K8ac_peak_27120 | 7.76104  | KCP_ENSG00000135253                                                               |
| 7 | 128551520 | 1.29E+08 | KD2-H4K8ac_peak_27121 | 5.1685   | KCP_ENSG00000135253                                                               |
| 7 | 128577553 | 1.29E+08 | KD2-H4K8ac_peak_27122 | 16.67374 | IRF5_ENSG00000128604                                                              |
| 7 | 128694420 | 1.29E+08 | KD2-H4K8ac_peak_27123 | 24.82509 | TNPO3_ENSG00000064419;TPII2_ENSG00000230359                                       |
| 7 | 128750847 | 1.29E+08 | KD2-H4K8ac_peak_27124 | 5.13615  |                                                                                   |
| 7 | 128828126 | 1.29E+08 | KD2-H4K8ac_peak_27125 | 22.32344 | SMO_ENSG00000128602                                                               |
| 7 | 128829387 | 1.29E+08 | KD2-H4K8ac_peak_27126 | 8.79106  | SMO_ENSG00000128602                                                               |
| 7 | 128863547 | 1.29E+08 | KD2-H4K8ac_peak_27127 | 4.86324  |                                                                                   |
| 7 | 129142266 | 1.29E+08 | KD2-H4K8ac_peak_27128 | 12.08081 | SMKR1_ENSG00000240204                                                             |
| 7 | 129250848 | 1.29E+08 | KD2-H4K8ac_peak_27129 | 12.48406 | RP11-448A19.1_ENSG00000273329;NRF1_ENSG00000106459                                |
| 7 | 129251673 | 1.29E+08 | KD2-H4K8ac_peak_27130 | 16.49944 | RP11-448A19.1_ENSG00000273329;NRF1_ENSG00000106459                                |
| 7 | 129445005 | 1.29E+08 | KD2-H4K8ac_peak_27131 | 9.61895  |                                                                                   |
| 7 | 129464541 | 1.29E+08 | KD2-H4K8ac_peak_27132 | 17.84477 |                                                                                   |
| 7 | 129465311 | 1.29E+08 | KD2-H4K8ac_peak_27133 | 10.7186  |                                                                                   |
| 7 | 129465862 | 1.29E+08 | KD2-H4K8ac_peak_27134 | 8.4716   |                                                                                   |
| 7 | 129470079 | 1.29E+08 | KD2-H4K8ac_peak_27135 | 7.98621  |                                                                                   |
| 7 | 129471893 | 1.29E+08 | KD2-H4K8ac_peak_27136 | 4.33139  |                                                                                   |
| 7 | 129473876 | 1.29E+08 | KD2-H4K8ac_peak_27137 | 3.97079  |                                                                                   |
| 7 | 129492594 | 1.29E+08 | KD2-H4K8ac_peak_27138 | 14.56955 |                                                                                   |

|   |           |          |                       |          |                                                     |
|---|-----------|----------|-----------------------|----------|-----------------------------------------------------|
| 7 | 129495379 | 1.29E+08 | KD2-H4K8ac_peak_27139 | 7.26089  |                                                     |
| 7 | 129496464 | 1.29E+08 | KD2-H4K8ac_peak_27140 | 4.42765  |                                                     |
| 7 | 129592105 | 1.3E+08  | KD2-H4K8ac_peak_27141 | 9.63487  | UBE2H_ENSG00000186591;RP11-306G20.1_ENSG00000244036 |
| 7 | 129690852 | 1.3E+08  | KD2-H4K8ac_peak_27142 | 9.95119  | ZC3HC1_ENSG00000091732                              |
| 7 | 129691369 | 1.3E+08  | KD2-H4K8ac_peak_27143 | 17.75427 | ZC3HC1_ENSG00000091732                              |
| 7 | 129709554 | 1.3E+08  | KD2-H4K8ac_peak_27144 | 7.04492  | KLHDC10_ENSG00000128607                             |
| 7 | 129710369 | 1.3E+08  | KD2-H4K8ac_peak_27145 | 13.70605 | KLHDC10_ENSG00000128607                             |
| 7 | 129781262 | 1.3E+08  | KD2-H4K8ac_peak_27146 | 8.58725  | RP11-775D22.2_ENSG00000229196                       |
| 7 | 129792742 | 1.3E+08  | KD2-H4K8ac_peak_27147 | 4.89305  |                                                     |
| 7 | 129794789 | 1.3E+08  | KD2-H4K8ac_peak_27148 | 6.0605   |                                                     |
| 7 | 129844240 | 1.3E+08  | KD2-H4K8ac_peak_27149 | 17.16047 |                                                     |
| 7 | 129845455 | 1.3E+08  | KD2-H4K8ac_peak_27150 | 15.039   |                                                     |
| 7 | 129882569 | 1.3E+08  | KD2-H4K8ac_peak_27151 | 4.77079  |                                                     |
| 7 | 130004622 | 1.3E+08  | KD2-H4K8ac_peak_27152 | 11.92978 |                                                     |
| 7 | 130006075 | 1.3E+08  | KD2-H4K8ac_peak_27153 | 10.40376 |                                                     |
| 7 | 130007563 | 1.3E+08  | KD2-H4K8ac_peak_27154 | 7.76329  |                                                     |
| 7 | 130012358 | 1.3E+08  | KD2-H4K8ac_peak_27155 | 9.90914  |                                                     |
| 7 | 130013398 | 1.3E+08  | KD2-H4K8ac_peak_27156 | 12.48406 |                                                     |
| 7 | 130019327 | 1.3E+08  | KD2-H4K8ac_peak_27157 | 18.53991 | CPA1_ENSG00000091704                                |
| 7 | 130079891 | 1.3E+08  | KD2-H4K8ac_peak_27158 | 13.94213 |                                                     |
| 7 | 130081265 | 1.3E+08  | KD2-H4K8ac_peak_27159 | 9.402    | CEP41_ENSG00000106477                               |
| 7 | 130131086 | 1.3E+08  | KD2-H4K8ac_peak_27160 | 6.85103  |                                                     |
| 7 | 130352857 | 1.3E+08  | KD2-H4K8ac_peak_27161 | 12.57297 | COPG2_ENSG00000158623                               |
| 7 | 130790257 | 1.31E+08 | KD2-H4K8ac_peak_27162 | 8.30974  |                                                     |
| 7 | 130794174 | 1.31E+08 | KD2-H4K8ac_peak_27163 | 19.88883 | LINC-PINT_ENSG00000231721;MKLN1_ENSG00000128585     |
| 7 | 130919989 | 1.31E+08 | KD2-H4K8ac_peak_27164 | 8.02571  |                                                     |
| 7 | 131011163 | 1.31E+08 | KD2-H4K8ac_peak_27165 | 6.25869  | MKLN1-AS_ENSG00000236753                            |
| 7 | 131012707 | 1.31E+08 | KD2-H4K8ac_peak_27166 | 10.35678 | MKLN1-AS_ENSG00000236753                            |
| 7 | 131198079 | 1.31E+08 | KD2-H4K8ac_peak_27167 | 6.48242  |                                                     |
| 7 | 131222912 | 1.31E+08 | KD2-H4K8ac_peak_27168 | 6.16883  |                                                     |
| 7 | 131241070 | 1.31E+08 | KD2-H4K8ac_peak_27169 | 6.87217  |                                                     |
| 7 | 131241586 | 1.31E+08 | KD2-H4K8ac_peak_27170 | 14.57762 |                                                     |
| 7 | 131242662 | 1.31E+08 | KD2-H4K8ac_peak_27171 | 16.54162 | PODXL_ENSG00000128567                               |
| 7 | 131306622 | 1.31E+08 | KD2-H4K8ac_peak_27172 | 4.211    |                                                     |
| 7 | 131339726 | 1.31E+08 | KD2-H4K8ac_peak_27173 | 5.88845  |                                                     |
| 7 | 131594008 | 1.32E+08 | KD2-H4K8ac_peak_27174 | 5.94405  |                                                     |
| 7 | 131843849 | 1.32E+08 | KD2-H4K8ac_peak_27175 | 5.82799  |                                                     |
| 7 | 131845773 | 1.32E+08 | KD2-H4K8ac_peak_27176 | 8.79106  |                                                     |
| 7 | 131887209 | 1.32E+08 | KD2-H4K8ac_peak_27177 | 4.86324  |                                                     |
| 7 | 132107630 | 1.32E+08 | KD2-H4K8ac_peak_27178 | 7.49599  |                                                     |
| 7 | 132119888 | 1.32E+08 | KD2-H4K8ac_peak_27179 | 8.55271  |                                                     |
| 7 | 132157512 | 1.32E+08 | KD2-H4K8ac_peak_27180 | 10.43145 |                                                     |
| 7 | 132159854 | 1.32E+08 | KD2-H4K8ac_peak_27181 | 8.16906  |                                                     |
| 7 | 132766367 | 1.33E+08 | KD2-H4K8ac_peak_27182 | 6.91862  | CHCHD3_ENSG00000106554;U6_ENSG00000272393           |
| 7 | 132937842 | 1.33E+08 | KD2-H4K8ac_peak_27183 | 11.50346 | EXOC4_ENSG00000131558                               |
| 7 | 133241595 | 1.33E+08 | KD2-H4K8ac_peak_27184 | 5.75452  |                                                     |

|   |           |          |                       |          |
|---|-----------|----------|-----------------------|----------|
| 7 | 133304600 | 1.33E+08 | KD2-H4K8ac_peak_27185 | 6.86812  |
| 7 | 133332148 | 1.33E+08 | KD2-H4K8ac_peak_27186 | 5.54647  |
| 7 | 133353956 | 1.33E+08 | KD2-H4K8ac_peak_27187 | 12.84642 |
| 7 | 133382399 | 1.33E+08 | KD2-H4K8ac_peak_27188 | 9.36665  |
| 7 | 133408342 | 1.33E+08 | KD2-H4K8ac_peak_27189 | 4.37809  |
| 7 | 133425924 | 1.33E+08 | KD2-H4K8ac_peak_27190 | 8.86099  |
| 7 | 133428340 | 1.33E+08 | KD2-H4K8ac_peak_27191 | 11.20059 |
| 7 | 133429625 | 1.33E+08 | KD2-H4K8ac_peak_27192 | 7.76329  |
| 7 | 133432537 | 1.33E+08 | KD2-H4K8ac_peak_27193 | 17.84477 |
| 7 | 133434168 | 1.33E+08 | KD2-H4K8ac_peak_27194 | 16.01591 |
| 7 | 133434951 | 1.33E+08 | KD2-H4K8ac_peak_27195 | 4.37809  |
| 7 | 133453872 | 1.33E+08 | KD2-H4K8ac_peak_27196 | 5.13615  |
| 7 | 133454996 | 1.33E+08 | KD2-H4K8ac_peak_27197 | 6.05879  |
| 7 | 133456769 | 1.33E+08 | KD2-H4K8ac_peak_27198 | 6.07694  |
| 7 | 133457543 | 1.33E+08 | KD2-H4K8ac_peak_27199 | 15.96909 |
| 7 | 133458941 | 1.33E+08 | KD2-H4K8ac_peak_27200 | 3.86308  |
| 7 | 133459781 | 1.33E+08 | KD2-H4K8ac_peak_27201 | 7.36799  |
| 7 | 133465983 | 1.33E+08 | KD2-H4K8ac_peak_27202 | 4.91674  |
| 7 | 133466978 | 1.33E+08 | KD2-H4K8ac_peak_27203 | 5.32713  |
| 7 | 133467577 | 1.33E+08 | KD2-H4K8ac_peak_27204 | 10.28547 |
| 7 | 133469129 | 1.33E+08 | KD2-H4K8ac_peak_27205 | 12.30509 |
| 7 | 133470275 | 1.33E+08 | KD2-H4K8ac_peak_27206 | 13.95627 |
| 7 | 133471002 | 1.33E+08 | KD2-H4K8ac_peak_27207 | 5.38581  |
| 7 | 133478040 | 1.33E+08 | KD2-H4K8ac_peak_27208 | 4.54006  |
| 7 | 133481016 | 1.33E+08 | KD2-H4K8ac_peak_27209 | 20.40378 |
| 7 | 133482347 | 1.33E+08 | KD2-H4K8ac_peak_27210 | 9.95119  |
| 7 | 133487292 | 1.33E+08 | KD2-H4K8ac_peak_27211 | 6.66359  |
| 7 | 133491071 | 1.33E+08 | KD2-H4K8ac_peak_27212 | 9.4622   |
| 7 | 133493318 | 1.33E+08 | KD2-H4K8ac_peak_27213 | 12.30509 |
| 7 | 133495695 | 1.33E+08 | KD2-H4K8ac_peak_27214 | 3.83717  |
| 7 | 133505470 | 1.34E+08 | KD2-H4K8ac_peak_27215 | 8.0287   |
| 7 | 133519656 | 1.34E+08 | KD2-H4K8ac_peak_27216 | 4.67342  |
| 7 | 133520879 | 1.34E+08 | KD2-H4K8ac_peak_27217 | 8.35576  |
| 7 | 133523330 | 1.34E+08 | KD2-H4K8ac_peak_27218 | 7.12213  |
| 7 | 133530959 | 1.34E+08 | KD2-H4K8ac_peak_27219 | 6.0605   |
| 7 | 133532003 | 1.34E+08 | KD2-H4K8ac_peak_27220 | 5.22391  |
| 7 | 133538379 | 1.34E+08 | KD2-H4K8ac_peak_27221 | 13.20642 |
| 7 | 133541017 | 1.34E+08 | KD2-H4K8ac_peak_27222 | 9.26408  |
| 7 | 133542203 | 1.34E+08 | KD2-H4K8ac_peak_27223 | 6.65075  |
| 7 | 133545980 | 1.34E+08 | KD2-H4K8ac_peak_27224 | 9.57101  |
| 7 | 133613075 | 1.34E+08 | KD2-H4K8ac_peak_27225 | 7.40111  |
| 7 | 133632907 | 1.34E+08 | KD2-H4K8ac_peak_27226 | 6.67081  |
| 7 | 133667881 | 1.34E+08 | KD2-H4K8ac_peak_27227 | 6.65673  |
| 7 | 133693467 | 1.34E+08 | KD2-H4K8ac_peak_27228 | 6.77511  |
| 7 | 133700842 | 1.34E+08 | KD2-H4K8ac_peak_27229 | 6.30626  |
| 7 | 133825649 | 1.34E+08 | KD2-H4K8ac_peak_27230 | 9.1707   |

|   |           |          |                       |          |                             |
|---|-----------|----------|-----------------------|----------|-----------------------------|
| 7 | 133827461 | 1.34E+08 | KD2-H4K8ac_peak_27231 | 5.88845  |                             |
| 7 | 133861163 | 1.34E+08 | KD2-H4K8ac_peak_27232 | 4.70206  |                             |
| 7 | 133879280 | 1.34E+08 | KD2-H4K8ac_peak_27233 | 9.16605  |                             |
| 7 | 134001163 | 1.34E+08 | KD2-H4K8ac_peak_27234 | 22.77389 | SLC35B4_ENSG00000205060     |
| 7 | 134116274 | 1.34E+08 | KD2-H4K8ac_peak_27235 | 9.06369  | RP11-38M8.1_ENSG00000273297 |
| 7 | 134117656 | 1.34E+08 | KD2-H4K8ac_peak_27236 | 16.33377 | RP11-38M8.1_ENSG00000273297 |
| 7 | 134143484 | 1.34E+08 | KD2-H4K8ac_peak_27237 | 12.37938 | AKR1B1_ENSG00000085662      |
| 7 | 134576234 | 1.35E+08 | KD2-H4K8ac_peak_27238 | 12.5605  |                             |
| 7 | 134670750 | 1.35E+08 | KD2-H4K8ac_peak_27239 | 10.19949 | AGBL3_ENSG00000146856       |
| 7 | 134671443 | 1.35E+08 | KD2-H4K8ac_peak_27240 | 8.58725  | AGBL3_ENSG00000146856       |
| 7 | 134854669 | 1.35E+08 | KD2-H4K8ac_peak_27241 | 20.34207 | C7orf49_ENSG00000122783     |
| 7 | 134856306 | 1.35E+08 | KD2-H4K8ac_peak_27242 | 9.34989  | C7orf49_ENSG00000122783     |
| 7 | 134895909 | 1.35E+08 | KD2-H4K8ac_peak_27243 | 5.01002  | WDR91_ENSG00000105875       |
| 7 | 135004419 | 1.35E+08 | KD2-H4K8ac_peak_27244 | 6.48242  |                             |
| 7 | 135004884 | 1.35E+08 | KD2-H4K8ac_peak_27245 | 15.96909 |                             |
| 7 | 135005380 | 1.35E+08 | KD2-H4K8ac_peak_27246 | 12.96152 |                             |
| 7 | 135006828 | 1.35E+08 | KD2-H4K8ac_peak_27247 | 18.473   |                             |
| 7 | 135105076 | 1.35E+08 | KD2-H4K8ac_peak_27248 | 7.27716  |                             |
| 7 | 135195509 | 1.35E+08 | KD2-H4K8ac_peak_27249 | 6.30229  | CNOT4_ENSG00000080802       |
| 7 | 135242470 | 1.35E+08 | KD2-H4K8ac_peak_27250 | 11.05155 | NUP205_ENSG00000155561      |
| 7 | 135346426 | 1.35E+08 | KD2-H4K8ac_peak_27251 | 13.22091 | C7orf73_ENSG00000243317     |
| 7 | 135348068 | 1.35E+08 | KD2-H4K8ac_peak_27252 | 5.4779   | C7orf73_ENSG00000243317     |
| 7 | 135398351 | 1.35E+08 | KD2-H4K8ac_peak_27253 | 7.146    |                             |
| 7 | 135399030 | 1.35E+08 | KD2-H4K8ac_peak_27254 | 9.95119  |                             |
| 7 | 135852400 | 1.36E+08 | KD2-H4K8ac_peak_27255 | 9.06432  |                             |
| 7 | 136279130 | 1.36E+08 | KD2-H4K8ac_peak_27256 | 5.82799  |                             |
| 7 | 136362377 | 1.36E+08 | KD2-H4K8ac_peak_27257 | 6.24114  |                             |
| 7 | 136379648 | 1.36E+08 | KD2-H4K8ac_peak_27258 | 5.14125  |                             |
| 7 | 136381746 | 1.36E+08 | KD2-H4K8ac_peak_27259 | 8.1718   |                             |
| 7 | 136554033 | 1.37E+08 | KD2-H4K8ac_peak_27260 | 10.21366 | CHRM2_ENSG00000181072       |
| 7 | 136555504 | 1.37E+08 | KD2-H4K8ac_peak_27261 | 10.05606 |                             |
| 7 | 137531110 | 1.38E+08 | KD2-H4K8ac_peak_27262 | 19.33018 | DGKI_ENSG00000157680        |
| 7 | 137685147 | 1.38E+08 | KD2-H4K8ac_peak_27263 | 7.36799  |                             |
| 7 | 137693357 | 1.38E+08 | KD2-H4K8ac_peak_27264 | 10.19949 |                             |
| 7 | 137830797 | 1.38E+08 | KD2-H4K8ac_peak_27265 | 6.56211  |                             |
| 7 | 137837844 | 1.38E+08 | KD2-H4K8ac_peak_27266 | 10.86318 |                             |
| 7 | 137838964 | 1.38E+08 | KD2-H4K8ac_peak_27267 | 14.66631 |                             |
| 7 | 137839829 | 1.38E+08 | KD2-H4K8ac_peak_27268 | 4.80593  |                             |
| 7 | 137840610 | 1.38E+08 | KD2-H4K8ac_peak_27269 | 4.211    |                             |
| 7 | 138145094 | 1.38E+08 | KD2-H4K8ac_peak_27270 | 13.35993 | TRIM24_ENSG00000122779      |
| 7 | 138350715 | 1.38E+08 | KD2-H4K8ac_peak_27271 | 8.55581  |                             |
| 7 | 138358890 | 1.38E+08 | KD2-H4K8ac_peak_27272 | 9.63256  |                             |
| 7 | 138363386 | 1.38E+08 | KD2-H4K8ac_peak_27273 | 4.54006  |                             |
| 7 | 138364093 | 1.38E+08 | KD2-H4K8ac_peak_27274 | 8.85813  |                             |
| 7 | 138365024 | 1.38E+08 | KD2-H4K8ac_peak_27275 | 8.0372   |                             |
| 7 | 138618882 | 1.39E+08 | KD2-H4K8ac_peak_27276 | 9.73431  |                             |

|   |           |          |                       |          |                                                        |
|---|-----------|----------|-----------------------|----------|--------------------------------------------------------|
| 7 | 138621091 | 1.39E+08 | KD2-H4K8ac_peak_27277 | 5.13615  |                                                        |
| 7 | 138665714 | 1.39E+08 | KD2-H4K8ac_peak_27278 | 16.54484 | KIAA1549_ENSG00000122778                               |
| 7 | 138720281 | 1.39E+08 | KD2-H4K8ac_peak_27279 | 14.95275 | ZC3HAV1L_ENSG00000146858                               |
| 7 | 138793037 | 1.39E+08 | KD2-H4K8ac_peak_27280 | 10.45683 |                                                        |
| 7 | 138793701 | 1.39E+08 | KD2-H4K8ac_peak_27281 | 17.53289 | ZC3HAV1_ENSG00000105939                                |
| 7 | 138818079 | 1.39E+08 | KD2-H4K8ac_peak_27282 | 6.05809  | TTC26_ENSG00000105948                                  |
| 7 | 138915468 | 1.39E+08 | KD2-H4K8ac_peak_27283 | 6.2827   | UBN2_ENSG00000157741                                   |
| 7 | 138916074 | 1.39E+08 | KD2-H4K8ac_peak_27284 | 10.39852 | UBN2_ENSG00000157741                                   |
| 7 | 139024631 | 1.39E+08 | KD2-H4K8ac_peak_27285 | 5.94405  | C7orf55_ENSG00000164898;C7orf55-LUC7L2_ENSG00000146963 |
| 7 | 139025633 | 1.39E+08 | KD2-H4K8ac_peak_27286 | 21.14153 | C7orf55-LUC7L2_ENSG00000146963;LUC7L2_ENSG00000269955  |
| 7 | 139043847 | 1.39E+08 | KD2-H4K8ac_peak_27287 | 8.86099  | RP11-634H22.1_ENSG00000273391                          |
| 7 | 139044695 | 1.39E+08 | KD2-H4K8ac_peak_27288 | 20.18584 | RP11-634H22.1_ENSG00000273391                          |
| 7 | 139476879 | 1.39E+08 | KD2-H4K8ac_peak_27289 | 9.1707   | HIPK2_ENSG00000064393;TBXAS1_ENSG00000059377           |
| 7 | 139477933 | 1.39E+08 | KD2-H4K8ac_peak_27290 | 9.048    | HIPK2_ENSG00000064393                                  |
| 7 | 139875740 | 1.4E+08  | KD2-H4K8ac_peak_27291 | 10.77651 | KDM7A_ENSG00000006459                                  |
| 7 | 139930099 | 1.4E+08  | KD2-H4K8ac_peak_27292 | 16.04168 |                                                        |
| 7 | 139931377 | 1.4E+08  | KD2-H4K8ac_peak_27293 | 7.0754   |                                                        |
| 7 | 140097885 | 1.4E+08  | KD2-H4K8ac_peak_27294 | 12.30509 |                                                        |
| 7 | 140098696 | 1.4E+08  | KD2-H4K8ac_peak_27295 | 12.47162 |                                                        |
| 7 | 140135257 | 1.4E+08  | KD2-H4K8ac_peak_27296 | 4.93968  | RP11-723C11.2_ENSG00000103200                          |
| 7 | 140178658 | 1.4E+08  | KD2-H4K8ac_peak_27297 | 12.20902 | MKRN1_ENSG00000133606                                  |
| 7 | 140194556 | 1.4E+08  | KD2-H4K8ac_peak_27298 | 5.14125  |                                                        |
| 7 | 140241255 | 1.4E+08  | KD2-H4K8ac_peak_27299 | 6.9039   |                                                        |
| 7 | 140325990 | 1.4E+08  | KD2-H4K8ac_peak_27300 | 11.66477 |                                                        |
| 7 | 140339882 | 1.4E+08  | KD2-H4K8ac_peak_27301 | 18.0925  |                                                        |
| 7 | 140372773 | 1.4E+08  | KD2-H4K8ac_peak_27302 | 10.52259 | DENND2A_ENSG00000146966;ADCK2_ENSG00000133597          |
| 7 | 140395790 | 1.4E+08  | KD2-H4K8ac_peak_27303 | 22.28045 | NDUFB2-AS1_ENSG00000240889                             |
| 7 | 140624093 | 1.41E+08 | KD2-H4K8ac_peak_27304 | 19.39602 | BRAF_ENSG00000157764                                   |
| 7 | 140713880 | 1.41E+08 | KD2-H4K8ac_peak_27305 | 6.60096  | MRPS33_ENSG00000090263                                 |
| 7 | 140714390 | 1.41E+08 | KD2-H4K8ac_peak_27306 | 8.85813  | MRPS33_ENSG00000090263                                 |
| 7 | 140714936 | 1.41E+08 | KD2-H4K8ac_peak_27307 | 16.57619 | MRPS33_ENSG00000090263                                 |
| 7 | 140773873 | 1.41E+08 | KD2-H4K8ac_peak_27308 | 10.7186  | TMEM178B_ENSG00000261115                               |
| 7 | 141250361 | 1.41E+08 | KD2-H4K8ac_peak_27309 | 17.43561 | RP11-744I24.2_ENSG00000261570;AGK_ENSG00000006530      |
| 7 | 141401367 | 1.41E+08 | KD2-H4K8ac_peak_27310 | 10.29842 | KIAA1147_ENSG00000257093                               |
| 7 | 141437177 | 1.41E+08 | KD2-H4K8ac_peak_27311 | 8.4716   | WEE2-AS1_ENSG00000228775;SSBP1_ENSG00000106028         |
| 7 | 141438205 | 1.41E+08 | KD2-H4K8ac_peak_27312 | 10.7186  | WEE2-AS1_ENSG00000228775;SSBP1_ENSG00000106028         |
| 7 | 142959666 | 1.43E+08 | KD2-H4K8ac_peak_27313 | 12.08081 |                                                        |
| 7 | 142960340 | 1.43E+08 | KD2-H4K8ac_peak_27314 | 8.86099  |                                                        |
| 7 | 142984585 | 1.43E+08 | KD2-H4K8ac_peak_27315 | 15.82362 | AC073342.12_ENSG00000231840;CASP2_ENSG00000106144      |
| 7 | 142985566 | 1.43E+08 | KD2-H4K8ac_peak_27316 | 16.29636 | CASP2_ENSG00000106144                                  |
| 7 | 143077757 | 1.43E+08 | KD2-H4K8ac_peak_27317 | 18.97568 | AC093673.5_ENSG00000232533;ZYG1_A3_ENSG00000159840     |
| 7 | 143582098 | 1.44E+08 | KD2-H4K8ac_peak_27318 | 4.44527  |                                                        |
| 7 | 143598742 | 1.44E+08 | KD2-H4K8ac_peak_27319 | 10.17486 | FAM115A_ENSG00000198420                                |
| 7 | 143599791 | 1.44E+08 | KD2-H4K8ac_peak_27320 | 6.66692  | FAM115A_ENSG00000198420                                |
| 7 | 144532455 | 1.45E+08 | KD2-H4K8ac_peak_27321 | 14.71663 | TPK1_ENSG00000196511                                   |
| 7 | 144533256 | 1.45E+08 | KD2-H4K8ac_peak_27322 | 8.58069  | TPK1_ENSG00000196511                                   |

|   |           |          |                       |          |                                                                         |
|---|-----------|----------|-----------------------|----------|-------------------------------------------------------------------------|
| 7 | 146523521 | 1.47E+08 | KD2-H4K8ac_peak_27323 | 11.30637 |                                                                         |
| 7 | 147500334 | 1.48E+08 | KD2-H4K8ac_peak_27324 | 7.99241  |                                                                         |
| 7 | 147530533 | 1.48E+08 | KD2-H4K8ac_peak_27325 | 10.1591  |                                                                         |
| 7 | 147812964 | 1.48E+08 | KD2-H4K8ac_peak_27326 | 5.13893  |                                                                         |
| 7 | 147923676 | 1.48E+08 | KD2-H4K8ac_peak_27327 | 4.12757  |                                                                         |
| 7 | 147959591 | 1.48E+08 | KD2-H4K8ac_peak_27328 | 5.54647  |                                                                         |
| 7 | 148395221 | 1.48E+08 | KD2-H4K8ac_peak_27329 | 16.58186 | RP5-1136G13.2_ENSG00000273314;CUL1_ENSG00000055130                      |
| 7 | 148570220 | 1.49E+08 | KD2-H4K8ac_peak_27330 | 4.64388  |                                                                         |
| 7 | 148580878 | 1.49E+08 | KD2-H4K8ac_peak_27331 | 13.77586 | EZH2_ENSG00000106462                                                    |
| 7 | 148581583 | 1.49E+08 | KD2-H4K8ac_peak_27332 | 21.76228 | EZH2_ENSG00000106462                                                    |
| 7 | 148638049 | 1.49E+08 | KD2-H4K8ac_peak_27333 | 5.38581  | RNY5_ENSG00000252310                                                    |
| 7 | 148679711 | 1.49E+08 | KD2-H4K8ac_peak_27334 | 8.85813  | RNY3_ENSG00000202354                                                    |
| 7 | 148680164 | 1.49E+08 | KD2-H4K8ac_peak_27335 | 11.22681 | RNY3_ENSG00000202354                                                    |
| 7 | 148725242 | 1.49E+08 | KD2-H4K8ac_peak_27336 | 9.19869  | PDIA4_ENSG00000155660                                                   |
| 7 | 148761701 | 1.49E+08 | KD2-H4K8ac_peak_27337 | 7.36799  |                                                                         |
| 7 | 148762501 | 1.49E+08 | KD2-H4K8ac_peak_27338 | 17.36246 |                                                                         |
| 7 | 148787464 | 1.49E+08 | KD2-H4K8ac_peak_27339 | 5.78173  | ZNF786_ENSG00000197362                                                  |
| 7 | 148788022 | 1.49E+08 | KD2-H4K8ac_peak_27340 | 22.08065 | ZNF786_ENSG00000197362                                                  |
| 7 | 148822946 | 1.49E+08 | KD2-H4K8ac_peak_27341 | 20.64015 | ZNF425_ENSG00000204947;RN7SL521P_ENSG00000240877;ZNF398_ENSG00000197024 |
| 7 | 148823637 | 1.49E+08 | KD2-H4K8ac_peak_27342 | 18.53991 | ZNF425_ENSG00000204947;RN7SL521P_ENSG00000240877;ZNF398_ENSG00000197024 |
| 7 | 148843266 | 1.49E+08 | KD2-H4K8ac_peak_27343 | 7.36799  |                                                                         |
| 7 | 148844083 | 1.49E+08 | KD2-H4K8ac_peak_27344 | 13.73635 |                                                                         |
| 7 | 148891900 | 1.49E+08 | KD2-H4K8ac_peak_27345 | 19.16083 | ZNF282_ENSG00000170265                                                  |
| 7 | 148936821 | 1.49E+08 | KD2-H4K8ac_peak_27346 | 6.24114  | ZNF212_ENSG00000170260                                                  |
| 7 | 148958537 | 1.49E+08 | KD2-H4K8ac_peak_27347 | 12.26437 | ZNF783_ENSG00000204946                                                  |
| 7 | 149118746 | 1.49E+08 | KD2-H4K8ac_peak_27348 | 7.07117  | RP11-143I21.1_ENSG00000261842                                           |
| 7 | 149119841 | 1.49E+08 | KD2-H4K8ac_peak_27349 | 10.43145 | RP11-143I21.1_ENSG00000261842                                           |
| 7 | 149156776 | 1.49E+08 | KD2-H4K8ac_peak_27350 | 11.58876 | ZNF777_ENSG00000196453                                                  |
| 7 | 149157541 | 1.49E+08 | KD2-H4K8ac_peak_27351 | 21.12734 | ZNF777_ENSG00000196453                                                  |
| 7 | 149194229 | 1.49E+08 | KD2-H4K8ac_peak_27352 | 9.95119  | ZNF746_ENSG00000181220                                                  |
| 7 | 149195069 | 1.49E+08 | KD2-H4K8ac_peak_27353 | 17.84477 | ZNF746_ENSG00000181220                                                  |
| 7 | 149321455 | 1.49E+08 | KD2-H4K8ac_peak_27354 | 37.08991 | ZNF767_ENSG00000133624                                                  |
| 7 | 149411335 | 1.49E+08 | KD2-H4K8ac_peak_27355 | 11.18097 | KRBA1_ENSG00000133619                                                   |
| 7 | 149412069 | 1.49E+08 | KD2-H4K8ac_peak_27356 | 7.36799  | KRBA1_ENSG00000133619                                                   |
| 7 | 149439321 | 1.49E+08 | KD2-H4K8ac_peak_27357 | 12.84642 |                                                                         |
| 7 | 149468303 | 1.49E+08 | KD2-H4K8ac_peak_27358 | 13.81781 |                                                                         |
| 7 | 149473846 | 1.49E+08 | KD2-H4K8ac_peak_27359 | 6.25869  | SSPO_ENSG00000197558                                                    |
| 7 | 149535577 | 1.5E+08  | KD2-H4K8ac_peak_27360 | 9.44322  | ZNF862_ENSG00000106479                                                  |
| 7 | 149570539 | 1.5E+08  | KD2-H4K8ac_peak_27361 | 7.11824  | ATP6V0E2_ENSG00000171130                                                |
| 7 | 149571165 | 1.5E+08  | KD2-H4K8ac_peak_27362 | 9.26287  |                                                                         |
| 7 | 150019721 | 1.5E+08  | KD2-H4K8ac_peak_27363 | 11.50346 | ACTR3C_ENSG00000106526;LRRC61_ENSG00000127399                           |
| 7 | 150065090 | 1.5E+08  | KD2-H4K8ac_peak_27364 | 24.70186 | REPIN1_ENSG00000214022;ZNF775_ENSG00000196456                           |
| 7 | 150075597 | 1.5E+08  | KD2-H4K8ac_peak_27365 | 24.27967 |                                                                         |
| 7 | 150076545 | 1.5E+08  | KD2-H4K8ac_peak_27366 | 20.10577 |                                                                         |
| 7 | 150101678 | 1.5E+08  | KD2-H4K8ac_peak_27367 | 17.43561 |                                                                         |
| 7 | 150103287 | 1.5E+08  | KD2-H4K8ac_peak_27368 | 5.07168  |                                                                         |

|   |           |          |                       |          |                                                     |
|---|-----------|----------|-----------------------|----------|-----------------------------------------------------|
| 7 | 150484345 | 1.5E+08  | KD2-H4K8ac_peak_27369 | 10.43601 |                                                     |
| 7 | 150485109 | 1.5E+08  | KD2-H4K8ac_peak_27370 | 14.30822 |                                                     |
| 7 | 150595953 | 1.51E+08 | KD2-H4K8ac_peak_27371 | 4.75829  |                                                     |
| 7 | 150651865 | 1.51E+08 | KD2-H4K8ac_peak_27372 | 13.94213 |                                                     |
| 7 | 150653586 | 1.51E+08 | KD2-H4K8ac_peak_27373 | 9.48511  |                                                     |
| 7 | 150659881 | 1.51E+08 | KD2-H4K8ac_peak_27374 | 6.40874  |                                                     |
| 7 | 150661727 | 1.51E+08 | KD2-H4K8ac_peak_27375 | 11.50346 |                                                     |
| 7 | 150667649 | 1.51E+08 | KD2-H4K8ac_peak_27376 | 28.07565 |                                                     |
| 7 | 150671855 | 1.51E+08 | KD2-H4K8ac_peak_27377 | 11.32417 |                                                     |
| 7 | 150673286 | 1.51E+08 | KD2-H4K8ac_peak_27378 | 10.43076 |                                                     |
| 7 | 150674971 | 1.51E+08 | KD2-H4K8ac_peak_27379 | 12.88702 | KCNH2_ENSG00000055118                               |
| 7 | 150675662 | 1.51E+08 | KD2-H4K8ac_peak_27380 | 5.38247  | KCNH2_ENSG00000055118                               |
| 7 | 150685849 | 1.51E+08 | KD2-H4K8ac_peak_27381 | 4.76255  |                                                     |
| 7 | 150710171 | 1.51E+08 | KD2-H4K8ac_peak_27382 | 6.66359  |                                                     |
| 7 | 150711047 | 1.51E+08 | KD2-H4K8ac_peak_27383 | 8.48413  |                                                     |
| 7 | 150714744 | 1.51E+08 | KD2-H4K8ac_peak_27384 | 7.57336  |                                                     |
| 7 | 150725002 | 1.51E+08 | KD2-H4K8ac_peak_27385 | 10.54778 | ABCB8_ENSG00000197150                               |
| 7 | 150725980 | 1.51E+08 | KD2-H4K8ac_peak_27386 | 10.53377 | ABCB8_ENSG00000197150;RP11-148K1.10_ENSG00000243433 |
| 7 | 150735541 | 1.51E+08 | KD2-H4K8ac_peak_27387 | 12.08081 |                                                     |
| 7 | 150737063 | 1.51E+08 | KD2-H4K8ac_peak_27388 | 7.49599  |                                                     |
| 7 | 150742320 | 1.51E+08 | KD2-H4K8ac_peak_27389 | 5.9696   |                                                     |
| 7 | 150754705 | 1.51E+08 | KD2-H4K8ac_peak_27390 | 7.76104  | CDK5_ENSG00000164885;SLC4A2_ENSG00000164889         |
| 7 | 150755369 | 1.51E+08 | KD2-H4K8ac_peak_27391 | 14.1664  | CDK5_ENSG00000164885                                |
| 7 | 150757004 | 1.51E+08 | KD2-H4K8ac_peak_27392 | 6.65075  |                                                     |
| 7 | 150777389 | 1.51E+08 | KD2-H4K8ac_peak_27393 | 23.7234  | FASTK_ENSG00000164896                               |
| 7 | 150778096 | 1.51E+08 | KD2-H4K8ac_peak_27394 | 15.19625 | FASTK_ENSG00000164896                               |
| 7 | 150780173 | 1.51E+08 | KD2-H4K8ac_peak_27395 | 17.67328 | TMUB1_ENSG00000164897                               |
| 7 | 150782886 | 1.51E+08 | KD2-H4K8ac_peak_27396 | 15.05184 | AGAP3_ENSG00000133612                               |
| 7 | 150784089 | 1.51E+08 | KD2-H4K8ac_peak_27397 | 4.79789  |                                                     |
| 7 | 150924546 | 1.51E+08 | KD2-H4K8ac_peak_27398 | 13.59098 | ABCF2_ENSG00000033050                               |
| 7 | 150928701 | 1.51E+08 | KD2-H4K8ac_peak_27399 | 17.69527 | CHPF2_ENSG00000033100                               |
| 7 | 150942354 | 1.51E+08 | KD2-H4K8ac_peak_27400 | 13.31016 |                                                     |
| 7 | 150945868 | 1.51E+08 | KD2-H4K8ac_peak_27401 | 6.66359  | RP5-1070G24.2_ENSG00000243018                       |
| 7 | 150948421 | 1.51E+08 | KD2-H4K8ac_peak_27402 | 23.19046 |                                                     |
| 7 | 150974035 | 1.51E+08 | KD2-H4K8ac_peak_27403 | 11.04256 | SMARCD3_ENSG00000082014                             |
| 7 | 151038323 | 1.51E+08 | KD2-H4K8ac_peak_27404 | 7.28628  | NUB1_ENSG00000013374                                |
| 7 | 151106378 | 1.51E+08 | KD2-H4K8ac_peak_27405 | 22.93827 | WDR86_ENSG00000187260;WDR86-AS1_ENSG00000243836     |
| 7 | 151157212 | 1.51E+08 | KD2-H4K8ac_peak_27406 | 7.29264  |                                                     |
| 7 | 151216199 | 1.51E+08 | KD2-H4K8ac_peak_27407 | 8.36432  | RHEB_ENSG00000106615                                |
| 7 | 151217440 | 1.51E+08 | KD2-H4K8ac_peak_27408 | 28.03233 | RHEB_ENSG00000106615                                |
| 7 | 151236146 | 1.51E+08 | KD2-H4K8ac_peak_27409 | 7.51054  |                                                     |
| 7 | 151328765 | 1.51E+08 | KD2-H4K8ac_peak_27410 | 35.19254 |                                                     |
| 7 | 151393906 | 1.51E+08 | KD2-H4K8ac_peak_27411 | 5.9696   |                                                     |
| 7 | 151424940 | 1.51E+08 | KD2-H4K8ac_peak_27412 | 8.79106  |                                                     |
| 7 | 151521624 | 1.52E+08 | KD2-H4K8ac_peak_27413 | 5.51783  |                                                     |
| 7 | 151573771 | 1.52E+08 | KD2-H4K8ac_peak_27414 | 11.05155 | PRKAG2_ENSG00000106617;PRKAG2-AS1_ENSG00000239911   |



|   |           |          |                       |          |                                                                         |
|---|-----------|----------|-----------------------|----------|-------------------------------------------------------------------------|
| 7 | 151630131 | 1.52E+08 | KD2-H4K8ac_peak_27415 | 6.99815  |                                                                         |
| 7 | 151722286 | 1.52E+08 | KD2-H4K8ac_peak_27416 | 15.66774 | GALNT11_ENSG00000178234                                                 |
| 7 | 152132745 | 1.52E+08 | KD2-H4K8ac_peak_27417 | 5.4779   | KMT2C_ENSG00000055609;FABP5P3_ENSG00000241735                           |
| 7 | 152133306 | 1.52E+08 | KD2-H4K8ac_peak_27418 | 20.65592 | KMT2C_ENSG00000055609;FABP5P3_ENSG00000241735                           |
| 7 | 152133949 | 1.52E+08 | KD2-H4K8ac_peak_27419 | 4.211    | KMT2C_ENSG00000055609;FABP5P3_ENSG00000241735                           |
| 7 | 152161249 | 1.52E+08 | KD2-H4K8ac_peak_27420 | 17.36246 | LINC01003_ENSG00000261455                                               |
| 7 | 152162641 | 1.52E+08 | KD2-H4K8ac_peak_27421 | 7.4599   |                                                                         |
| 7 | 152455993 | 1.52E+08 | KD2-H4K8ac_peak_27422 | 9.16531  | ACTR3B_ENSG00000133627                                                  |
| 7 | 152456913 | 1.52E+08 | KD2-H4K8ac_peak_27423 | 21.6161  | ACTR3B_ENSG00000133627                                                  |
| 7 | 152537390 | 1.53E+08 | KD2-H4K8ac_peak_27424 | 18.78112 |                                                                         |
| 7 | 153632016 | 1.54E+08 | KD2-H4K8ac_peak_27425 | 8.55271  |                                                                         |
| 7 | 153748248 | 1.54E+08 | KD2-H4K8ac_peak_27426 | 6.40683  |                                                                         |
| 7 | 153748760 | 1.54E+08 | KD2-H4K8ac_peak_27427 | 5.16439  |                                                                         |
| 7 | 153863358 | 1.54E+08 | KD2-H4K8ac_peak_27428 | 9.36516  |                                                                         |
| 7 | 153865514 | 1.54E+08 | KD2-H4K8ac_peak_27429 | 5.14125  |                                                                         |
| 7 | 153881321 | 1.54E+08 | KD2-H4K8ac_peak_27430 | 6.67092  |                                                                         |
| 7 | 154001313 | 1.54E+08 | KD2-H4K8ac_peak_27431 | 5.59859  |                                                                         |
| 7 | 154001856 | 1.54E+08 | KD2-H4K8ac_peak_27432 | 9.95119  |                                                                         |
| 7 | 154002450 | 1.54E+08 | KD2-H4K8ac_peak_27433 | 5.54647  |                                                                         |
| 7 | 154050078 | 1.54E+08 | KD2-H4K8ac_peak_27434 | 7.47462  |                                                                         |
| 7 | 154051088 | 1.54E+08 | KD2-H4K8ac_peak_27435 | 11.92978 |                                                                         |
| 7 | 154068654 | 1.54E+08 | KD2-H4K8ac_peak_27436 | 7.47462  |                                                                         |
| 7 | 154250443 | 1.54E+08 | KD2-H4K8ac_peak_27437 | 7.12754  |                                                                         |
| 7 | 154663690 | 1.55E+08 | KD2-H4K8ac_peak_27438 | 8.2413   |                                                                         |
| 7 | 154793987 | 1.55E+08 | KD2-H4K8ac_peak_27439 | 12.2118  | PAXIP1_ENSG00000157212;PAXIP1-AS1_ENSG00000273344                       |
| 7 | 154794813 | 1.55E+08 | KD2-H4K8ac_peak_27440 | 23.28866 | PAXIP1_ENSG00000157212;PAXIP1-AS1_ENSG00000273344                       |
| 7 | 155005673 | 1.55E+08 | KD2-H4K8ac_peak_27441 | 4.211    |                                                                         |
| 7 | 155018204 | 1.55E+08 | KD2-H4K8ac_peak_27442 | 5.30799  |                                                                         |
| 7 | 155020091 | 1.55E+08 | KD2-H4K8ac_peak_27443 | 5.1685   |                                                                         |
| 7 | 155029014 | 1.55E+08 | KD2-H4K8ac_peak_27444 | 8.55271  |                                                                         |
| 7 | 155049559 | 1.55E+08 | KD2-H4K8ac_peak_27445 | 13.63296 |                                                                         |
| 7 | 155051015 | 1.55E+08 | KD2-H4K8ac_peak_27446 | 5.71781  |                                                                         |
| 7 | 155051494 | 1.55E+08 | KD2-H4K8ac_peak_27447 | 6.65673  |                                                                         |
| 7 | 155088682 | 1.55E+08 | KD2-H4K8ac_peak_27448 | 28.55229 | AC144652.1_ENSG00000273117;INSIG1_ENSG00000186480                       |
| 7 | 155089706 | 1.55E+08 | KD2-H4K8ac_peak_27449 | 7.07117  | AC144652.1_ENSG00000273117;INSIG1_ENSG00000186480                       |
| 7 | 155137194 | 1.55E+08 | KD2-H4K8ac_peak_27450 | 14.39182 |                                                                         |
| 7 | 155377007 | 1.55E+08 | KD2-H4K8ac_peak_27451 | 5.13615  |                                                                         |
| 7 | 155383146 | 1.55E+08 | KD2-H4K8ac_peak_27452 | 7.07117  |                                                                         |
| 7 | 155436468 | 1.55E+08 | KD2-H4K8ac_peak_27453 | 18.40451 | AC009403.2_ENSG00000216895;RBM33_ENSG00000184863                        |
| 7 | 156400000 | 1.56E+08 | KD2-H4K8ac_peak_27454 | 22.21705 |                                                                         |
| 7 | 156409070 | 1.56E+08 | KD2-H4K8ac_peak_27455 | 9.63487  |                                                                         |
| 7 | 156409518 | 1.56E+08 | KD2-H4K8ac_peak_27456 | 11.24702 |                                                                         |
| 7 | 156432655 | 1.56E+08 | KD2-H4K8ac_peak_27457 | 27.57364 | LINC01006_ENSG00000182648;C7orf13_ENSG00000244291;RNF32_ENSG00000105982 |
| 7 | 156569601 | 1.57E+08 | KD2-H4K8ac_peak_27458 | 7.40111  |                                                                         |
| 7 | 156570549 | 1.57E+08 | KD2-H4K8ac_peak_27459 | 5.557    |                                                                         |
| 7 | 156573443 | 1.57E+08 | KD2-H4K8ac_peak_27460 | 6.25869  |                                                                         |

|   |           |          |                       |          |                                                                               |
|---|-----------|----------|-----------------------|----------|-------------------------------------------------------------------------------|
| 7 | 156575907 | 1.57E+08 | KD2-H4K8ac_peak_27461 | 7.07117  |                                                                               |
| 7 | 156576864 | 1.57E+08 | KD2-H4K8ac_peak_27462 | 4.211    |                                                                               |
| 7 | 156577651 | 1.57E+08 | KD2-H4K8ac_peak_27463 | 6.83936  |                                                                               |
| 7 | 156579750 | 1.57E+08 | KD2-H4K8ac_peak_27464 | 6.66692  |                                                                               |
| 7 | 156580587 | 1.57E+08 | KD2-H4K8ac_peak_27465 | 6.67092  |                                                                               |
| 7 | 156584786 | 1.57E+08 | KD2-H4K8ac_peak_27466 | 6.36375  |                                                                               |
| 7 | 156586621 | 1.57E+08 | KD2-H4K8ac_peak_27467 | 13.31669 |                                                                               |
| 7 | 156589630 | 1.57E+08 | KD2-H4K8ac_peak_27468 | 6.25869  |                                                                               |
| 7 | 156590156 | 1.57E+08 | KD2-H4K8ac_peak_27469 | 7.01494  |                                                                               |
| 7 | 156590819 | 1.57E+08 | KD2-H4K8ac_peak_27470 | 6.14031  |                                                                               |
| 7 | 156686123 | 1.57E+08 | KD2-H4K8ac_peak_27471 | 7.76329  | LMBR1_ENSG00000105983                                                         |
| 7 | 156741484 | 1.57E+08 | KD2-H4K8ac_peak_27472 | 10.7186  | NOM1_ENSG00000146909                                                          |
| 7 | 156742473 | 1.57E+08 | KD2-H4K8ac_peak_27473 | 9.26408  | NOM1_ENSG00000146909                                                          |
| 7 | 156930933 | 1.57E+08 | KD2-H4K8ac_peak_27474 | 16.822   | UBE3C_ENSG00000009335                                                         |
| 7 | 156931676 | 1.57E+08 | KD2-H4K8ac_peak_27475 | 10.78621 | UBE3C_ENSG00000009335                                                         |
| 7 | 156941943 | 1.57E+08 | KD2-H4K8ac_peak_27476 | 5.9696   |                                                                               |
| 7 | 156952674 | 1.57E+08 | KD2-H4K8ac_peak_27477 | 8.59579  |                                                                               |
| 7 | 156955034 | 1.57E+08 | KD2-H4K8ac_peak_27478 | 5.54647  |                                                                               |
| 7 | 156975949 | 1.57E+08 | KD2-H4K8ac_peak_27479 | 8.10216  |                                                                               |
| 7 | 156979436 | 1.57E+08 | KD2-H4K8ac_peak_27480 | 5.14125  |                                                                               |
| 7 | 156983944 | 1.57E+08 | KD2-H4K8ac_peak_27481 | 5.71749  | RP4-814D15.2_ENSG00000225224                                                  |
| 7 | 157069607 | 1.57E+08 | KD2-H4K8ac_peak_27482 | 10.17486 |                                                                               |
| 7 | 157129043 | 1.57E+08 | KD2-H4K8ac_peak_27483 | 17.36246 | DNAJB6_ENSG00000105993                                                        |
| 7 | 157129764 | 1.57E+08 | KD2-H4K8ac_peak_27484 | 9.87655  |                                                                               |
| 7 | 157482903 | 1.57E+08 | KD2-H4K8ac_peak_27485 | 9.67696  |                                                                               |
| 7 | 157544949 | 1.58E+08 | KD2-H4K8ac_peak_27486 | 4.84794  |                                                                               |
| 7 | 157545894 | 1.58E+08 | KD2-H4K8ac_peak_27487 | 9.1511   |                                                                               |
| 7 | 157784098 | 1.58E+08 | KD2-H4K8ac_peak_27488 | 4.70206  |                                                                               |
| 7 | 157903467 | 1.58E+08 | KD2-H4K8ac_peak_27489 | 7.03656  |                                                                               |
| 7 | 158067218 | 1.58E+08 | KD2-H4K8ac_peak_27490 | 7.47462  |                                                                               |
| 7 | 158067825 | 1.58E+08 | KD2-H4K8ac_peak_27491 | 5.33892  |                                                                               |
| 7 | 158380831 | 1.58E+08 | KD2-H4K8ac_peak_27492 | 5.54647  | PTPRN2_ENSG00000155093                                                        |
| 7 | 158497066 | 1.58E+08 | KD2-H4K8ac_peak_27493 | 8.38692  | NCAPG2_ENSG00000146918                                                        |
| 7 | 158497875 | 1.58E+08 | KD2-H4K8ac_peak_27494 | 13.233   | NCAPG2_ENSG00000146918                                                        |
| 7 | 158611204 | 1.59E+08 | KD2-H4K8ac_peak_27495 | 7.76104  |                                                                               |
| 7 | 158621080 | 1.59E+08 | KD2-H4K8ac_peak_27496 | 5.88845  |                                                                               |
| 7 | 158622477 | 1.59E+08 | KD2-H4K8ac_peak_27497 | 5.17785  | ESYT2_ENSG00000117868                                                         |
| 7 | 158648654 | 1.59E+08 | KD2-H4K8ac_peak_27498 | 12.30509 | WDR60_ENSG00000126870                                                         |
| 7 | 158649399 | 1.59E+08 | KD2-H4K8ac_peak_27499 | 6.0605   | WDR60_ENSG00000126870                                                         |
| 7 | 158823282 | 1.59E+08 | KD2-H4K8ac_peak_27500 | 8.86099  |                                                                               |
| 8 | 182426    | 182919   | KD2-H4K8ac_peak_27501 | 10.96455 | RPL23AP53_ENSG00000223508;ZNF596_ENSG00000172748;RP5-855D21.3_ENSG00000272812 |
| 8 | 296716    | 297023   | KD2-H4K8ac_peak_27502 | 5.57044  |                                                                               |
| 8 | 340882    | 341136   | KD2-H4K8ac_peak_27503 | 3.74443  |                                                                               |
| 8 | 494236    | 494852   | KD2-H4K8ac_peak_27504 | 8.17902  | TDRP_ENSG00000180190                                                          |
| 8 | 495560    | 496016   | KD2-H4K8ac_peak_27505 | 12.08081 | TDRP_ENSG00000180190                                                          |
| 8 | 681516    | 681724   | KD2-H4K8ac_peak_27506 | 8.01338  |                                                                               |

|   |         |         |                       |          |                                                                                     |
|---|---------|---------|-----------------------|----------|-------------------------------------------------------------------------------------|
| 8 | 899644  | 899854  | KD2-H4K8ac_peak_27507 | 7.79898  |                                                                                     |
| 8 | 912273  | 912545  | KD2-H4K8ac_peak_27508 | 5.25071  |                                                                                     |
| 8 | 1080784 | 1081002 | KD2-H4K8ac_peak_27509 | 6.03693  |                                                                                     |
| 8 | 1081247 | 1081478 | KD2-H4K8ac_peak_27510 | 5.57044  |                                                                                     |
| 8 | 1093598 | 1093806 | KD2-H4K8ac_peak_27511 | 7.33266  |                                                                                     |
| 8 | 1104666 | 1105179 | KD2-H4K8ac_peak_27512 | 9.11031  |                                                                                     |
| 8 | 1111951 | 1112147 | KD2-H4K8ac_peak_27513 | 5.25071  |                                                                                     |
| 8 | 1112913 | 1113306 | KD2-H4K8ac_peak_27514 | 4.42765  |                                                                                     |
| 8 | 1202670 | 1203373 | KD2-H4K8ac_peak_27515 | 8.1233   |                                                                                     |
| 8 | 1321165 | 1321760 | KD2-H4K8ac_peak_27516 | 10.43145 |                                                                                     |
| 8 | 1426037 | 1426243 | KD2-H4K8ac_peak_27517 | 7.40111  |                                                                                     |
| 8 | 1431199 | 1431606 | KD2-H4K8ac_peak_27518 | 6.09229  |                                                                                     |
| 8 | 1432250 | 1432711 | KD2-H4K8ac_peak_27519 | 5.57044  |                                                                                     |
| 8 | 1465496 | 1465710 | KD2-H4K8ac_peak_27520 | 7.96322  |                                                                                     |
| 8 | 1474943 | 1475297 | KD2-H4K8ac_peak_27521 | 8.84031  |                                                                                     |
| 8 | 1499543 | 1499905 | KD2-H4K8ac_peak_27522 | 5.77029  |                                                                                     |
| 8 | 1500347 | 1500554 | KD2-H4K8ac_peak_27523 | 7.40314  |                                                                                     |
| 8 | 1712012 | 1712330 | KD2-H4K8ac_peak_27524 | 9.19305  | CTD-2336O2.1_ENSG00000253982                                                        |
| 8 | 1771606 | 1771883 | KD2-H4K8ac_peak_27525 | 12.08081 | ARHGEF10_ENSG00000104728                                                            |
| 8 | 1772295 | 1772503 | KD2-H4K8ac_peak_27526 | 10.29736 | ARHGEF10_ENSG00000104728                                                            |
| 8 | 1846283 | 1846476 | KD2-H4K8ac_peak_27527 | 4.20044  |                                                                                     |
| 8 | 1877791 | 1878417 | KD2-H4K8ac_peak_27528 | 11.79585 |                                                                                     |
| 8 | 1921595 | 1922022 | KD2-H4K8ac_peak_27529 | 14.8083  | RP11-439C15.4_ENSG00000253764;KBTBD11_ENSG00000176595;RP11-439C15.5_ENSG00000270988 |
| 8 | 1949549 | 1949969 | KD2-H4K8ac_peak_27530 | 9.89383  |                                                                                     |
| 8 | 6263261 | 6264314 | KD2-H4K8ac_peak_27531 | 18.24798 | RP11-115C21.2_ENSG00000246089;MCPH1_ENSG00000147316                                 |
| 8 | 6407750 | 6408122 | KD2-H4K8ac_peak_27532 | 6.56211  |                                                                                     |
| 8 | 6565293 | 6565674 | KD2-H4K8ac_peak_27533 | 22.21127 | CTD-2541M15.1_ENSG00000249898;AGPAT5_ENSG00000155189                                |
| 8 | 6565885 | 6566575 | KD2-H4K8ac_peak_27534 | 12.84642 | CTD-2541M15.1_ENSG00000249898;AGPAT5_ENSG00000155189                                |
| 8 | 6691901 | 6693004 | KD2-H4K8ac_peak_27535 | 14.8083  | XKR5_ENSG00000186530;GS1-24F4.2_ENSG00000245857                                     |
| 8 | 7212397 | 7212851 | KD2-H4K8ac_peak_27536 | 17.42905 | FAM66B_ENSG00000215374                                                              |
| 8 | 8180973 | 8181270 | KD2-H4K8ac_peak_27537 | 13.51255 |                                                                                     |
| 8 | 8182137 | 8182347 | KD2-H4K8ac_peak_27538 | 5.14125  |                                                                                     |
| 8 | 8244023 | 8244451 | KD2-H4K8ac_peak_27539 | 11.22681 | SGK223_ENSG00000182319                                                              |
| 8 | 8580895 | 8581199 | KD2-H4K8ac_peak_27540 | 5.14125  |                                                                                     |
| 8 | 8750454 | 8751014 | KD2-H4K8ac_peak_27541 | 13.09607 | MFHAS1_ENSG00000147324                                                              |
| 8 | 8751212 | 8751718 | KD2-H4K8ac_peak_27542 | 9.1707   | MFHAS1_ENSG00000147324                                                              |
| 8 | 8860492 | 8860814 | KD2-H4K8ac_peak_27543 | 7.47462  | ERII_ENSG00000104626                                                                |
| 8 | 9034730 | 9034924 | KD2-H4K8ac_peak_27544 | 9.1707   |                                                                                     |
| 8 | 9039277 | 9039524 | KD2-H4K8ac_peak_27545 | 7.36799  | RP11-10A14.6_ENSG00000253252                                                        |
| 8 | 9041171 | 9041728 | KD2-H4K8ac_peak_27546 | 5.9696   |                                                                                     |
| 8 | 9052644 | 9052956 | KD2-H4K8ac_peak_27547 | 4.77079  |                                                                                     |
| 8 | 9053955 | 9054209 | KD2-H4K8ac_peak_27548 | 8.6308   |                                                                                     |
| 8 | 9055987 | 9056557 | KD2-H4K8ac_peak_27549 | 7.27716  |                                                                                     |
| 8 | 9056785 | 9058087 | KD2-H4K8ac_peak_27550 | 17.76996 |                                                                                     |
| 8 | 9194005 | 9194206 | KD2-H4K8ac_peak_27551 | 10.21502 |                                                                                     |
| 8 | 9413477 | 9414097 | KD2-H4K8ac_peak_27552 | 8.4716   | RP11-375N15.2_ENSG00000272267;TNKS_ENSG00000173273                                  |

|   |          |          |                       |          |                                                                                              |
|---|----------|----------|-----------------------|----------|----------------------------------------------------------------------------------------------|
| 8 | 9764091  | 9764516  | KD2-H4K8ac_peak_27553 | 4.86324  |                                                                                              |
| 8 | 9911770  | 9912141  | KD2-H4K8ac_peak_27554 | 6.24114  | RP11-1E4.1_ENSG00000260093;MSRA_ENSG00000175806                                              |
| 8 | 9912351  | 9912656  | KD2-H4K8ac_peak_27555 | 6.55628  | RP11-1E4.1_ENSG00000260093;MSRA_ENSG00000175806                                              |
| 8 | 10053459 | 10053736 | KD2-H4K8ac_peak_27556 | 7.79898  |                                                                                              |
| 8 | 10190877 | 10191453 | KD2-H4K8ac_peak_27557 | 5.54647  |                                                                                              |
| 8 | 10192095 | 10192340 | KD2-H4K8ac_peak_27558 | 9.1707   |                                                                                              |
| 8 | 10192895 | 10193350 | KD2-H4K8ac_peak_27559 | 5.57044  |                                                                                              |
| 8 | 10223823 | 10224075 | KD2-H4K8ac_peak_27560 | 6.16888  |                                                                                              |
| 8 | 10235406 | 10235679 | KD2-H4K8ac_peak_27561 | 4.54006  |                                                                                              |
| 8 | 10282109 | 10282396 | KD2-H4K8ac_peak_27562 | 5.88845  |                                                                                              |
| 8 | 10511986 | 10512384 | KD2-H4K8ac_peak_27563 | 6.25869  |                                                                                              |
| 8 | 10587406 | 10588135 | KD2-H4K8ac_peak_27564 | 14.87796 | CTD-2135J3.3_ENSG00000248896                                                                 |
| 8 | 10634165 | 10634402 | KD2-H4K8ac_peak_27565 | 8.62078  |                                                                                              |
| 8 | 10635283 | 10635605 | KD2-H4K8ac_peak_27566 | 15.53082 |                                                                                              |
| 8 | 10696921 | 10697332 | KD2-H4K8ac_peak_27567 | 12.3187  | SOX7_ENSG00000171056;SOX7_ENSG00000258724;PINX1_ENSG00000254093;RP11-177H2.2_ENSG00000253695 |
| 8 | 10697621 | 10698094 | KD2-H4K8ac_peak_27568 | 8.74596  | SOX7_ENSG00000171056;SOX7_ENSG00000258724;PINX1_ENSG00000254093;RP11-177H2.2_ENSG00000253695 |
| 8 | 10873102 | 10873889 | KD2-H4K8ac_peak_27569 | 8.10216  |                                                                                              |
| 8 | 10910375 | 10910668 | KD2-H4K8ac_peak_27570 | 12.84642 |                                                                                              |
| 8 | 10916555 | 10916813 | KD2-H4K8ac_peak_27571 | 9.57101  |                                                                                              |
| 8 | 11057810 | 11058263 | KD2-H4K8ac_peak_27572 | 4.211    | XKR6_ENSG00000171044                                                                         |
| 8 | 11058464 | 11058833 | KD2-H4K8ac_peak_27573 | 13.31016 | XKR6_ENSG00000171044                                                                         |
| 8 | 11059031 | 11059508 | KD2-H4K8ac_peak_27574 | 21.6161  | AF131215.8_ENSG00000270076;XKR6_ENSG00000171044                                              |
| 8 | 11141418 | 11141816 | KD2-H4K8ac_peak_27575 | 13.81781 | MTMR9_ENSG00000104643                                                                        |
| 8 | 11142051 | 11142763 | KD2-H4K8ac_peak_27576 | 8.52559  | MTMR9_ENSG00000104643                                                                        |
| 8 | 11267290 | 11267546 | KD2-H4K8ac_peak_27577 | 7.76329  |                                                                                              |
| 8 | 11312002 | 11312258 | KD2-H4K8ac_peak_27578 | 6.97919  |                                                                                              |
| 8 | 11317648 | 11318376 | KD2-H4K8ac_peak_27579 | 4.86324  |                                                                                              |
| 8 | 11318617 | 11318978 | KD2-H4K8ac_peak_27580 | 7.76329  |                                                                                              |
| 8 | 11319393 | 11319706 | KD2-H4K8ac_peak_27581 | 5.38282  |                                                                                              |
| 8 | 11321888 | 11322107 | KD2-H4K8ac_peak_27582 | 5.98692  |                                                                                              |
| 8 | 11323643 | 11324244 | KD2-H4K8ac_peak_27583 | 6.65673  |                                                                                              |
| 8 | 11376036 | 11376234 | KD2-H4K8ac_peak_27584 | 5.57044  |                                                                                              |
| 8 | 11406228 | 11406625 | KD2-H4K8ac_peak_27585 | 4.42765  |                                                                                              |
| 8 | 11421484 | 11422094 | KD2-H4K8ac_peak_27586 | 9.13143  |                                                                                              |
| 8 | 11429095 | 11429401 | KD2-H4K8ac_peak_27587 | 5.75452  |                                                                                              |
| 8 | 11445156 | 11445398 | KD2-H4K8ac_peak_27588 | 10.30284 |                                                                                              |
| 8 | 11446043 | 11446508 | KD2-H4K8ac_peak_27589 | 8.05925  |                                                                                              |
| 8 | 11451365 | 11451983 | KD2-H4K8ac_peak_27590 | 5.20998  |                                                                                              |
| 8 | 11469746 | 11472058 | KD2-H4K8ac_peak_27591 | 19.35989 |                                                                                              |
| 8 | 11489131 | 11489355 | KD2-H4K8ac_peak_27592 | 6.90231  |                                                                                              |
| 8 | 11498550 | 11498808 | KD2-H4K8ac_peak_27593 | 6.79289  |                                                                                              |
| 8 | 11499049 | 11499306 | KD2-H4K8ac_peak_27594 | 6.64891  |                                                                                              |
| 8 | 11500346 | 11500550 | KD2-H4K8ac_peak_27595 | 8.16906  |                                                                                              |
| 8 | 11501441 | 11501747 | KD2-H4K8ac_peak_27596 | 5.82799  |                                                                                              |
| 8 | 11508688 | 11509022 | KD2-H4K8ac_peak_27597 | 6.37652  |                                                                                              |
| 8 | 11534506 | 11535109 | KD2-H4K8ac_peak_27598 | 6.40683  | GATA4_ENSG00000136574                                                                        |

|   |          |          |                       |          |                                                      |
|---|----------|----------|-----------------------|----------|------------------------------------------------------|
| 8 | 11599035 | 11599767 | KD2-H4K8ac_peak_27599 | 6.40297  |                                                      |
| 8 | 11600314 | 11600537 | KD2-H4K8ac_peak_27600 | 5.48272  |                                                      |
| 8 | 11600818 | 11601234 | KD2-H4K8ac_peak_27601 | 9.63487  |                                                      |
| 8 | 11658965 | 11659579 | KD2-H4K8ac_peak_27602 | 9.89383  | RP11-297N6.4_ENSG00000255046                         |
| 8 | 11660371 | 11660638 | KD2-H4K8ac_peak_27603 | 7.36799  | RP11-297N6.4_ENSG00000255046                         |
| 8 | 11724665 | 11725233 | KD2-H4K8ac_peak_27604 | 6.65673  |                                                      |
| 8 | 11725761 | 11726050 | KD2-H4K8ac_peak_27605 | 18.39704 | CTSB_ENSG00000164733                                 |
| 8 | 11812571 | 11812958 | KD2-H4K8ac_peak_27606 | 6.40297  |                                                      |
| 8 | 11814974 | 11815254 | KD2-H4K8ac_peak_27607 | 5.45396  |                                                      |
| 8 | 11973355 | 11973668 | KD2-H4K8ac_peak_27608 | 9.15329  | FAM66D_ENSG00000255052                               |
| 8 | 12052397 | 12052637 | KD2-H4K8ac_peak_27609 | 17.8868  | FAM86B1_ENSG00000186523;FAM85A_ENSG00000255495       |
| 8 | 12070007 | 12070218 | KD2-H4K8ac_peak_27610 | 9.11031  |                                                      |
| 8 | 12611468 | 12612591 | KD2-H4K8ac_peak_27611 | 10.53377 | LONRF1_ENSG00000154359                               |
| 8 | 12613130 | 12613851 | KD2-H4K8ac_peak_27612 | 14.69065 | LONRF1_ENSG00000154359                               |
| 8 | 13283277 | 13283471 | KD2-H4K8ac_peak_27613 | 5.25071  |                                                      |
| 8 | 13424436 | 13424665 | KD2-H4K8ac_peak_27614 | 4.86324  | C8orf48_ENSG00000164743                              |
| 8 | 15397472 | 15398042 | KD2-H4K8ac_peak_27615 | 17.19888 |                                                      |
| 8 | 16859258 | 16859455 | KD2-H4K8ac_peak_27616 | 6.83936  | FGF20_ENSG00000078579                                |
| 8 | 16884839 | 16885258 | KD2-H4K8ac_peak_27617 | 9.20193  | MICU3_ENSG00000155970                                |
| 8 | 17013322 | 17014335 | KD2-H4K8ac_peak_27618 | 8.55271  | ZDHHC2_ENSG00000104219                               |
| 8 | 17103748 | 17104729 | KD2-H4K8ac_peak_27619 | 8.37231  | CNOT7_ENSG00000198791;VPS37A_ENSG00000155975         |
| 8 | 17270302 | 17270686 | KD2-H4K8ac_peak_27620 | 7.47462  | MTMR7_ENSG00000003987                                |
| 8 | 17271044 | 17271559 | KD2-H4K8ac_peak_27621 | 9.36516  | MTMR7_ENSG00000003987                                |
| 8 | 17354854 | 17355120 | KD2-H4K8ac_peak_27622 | 6.64891  | SLC7A2_ENSG00000003989                               |
| 8 | 17434777 | 17435220 | KD2-H4K8ac_peak_27623 | 5.57044  | PDGFRL_ENSG00000104213                               |
| 8 | 17460644 | 17460856 | KD2-H4K8ac_peak_27624 | 4.86324  |                                                      |
| 8 | 17521140 | 17521389 | KD2-H4K8ac_peak_27625 | 10.05606 |                                                      |
| 8 | 17527154 | 17527832 | KD2-H4K8ac_peak_27626 | 4.211    |                                                      |
| 8 | 17535441 | 17535645 | KD2-H4K8ac_peak_27627 | 5.07241  |                                                      |
| 8 | 17658317 | 17658818 | KD2-H4K8ac_peak_27628 | 6.25869  | MTUS1_ENSG00000129422;RP11-156K13.1_ENSG00000253944  |
| 8 | 17780646 | 17781018 | KD2-H4K8ac_peak_27629 | 15.039   | PCM1_ENSG00000078674                                 |
| 8 | 17941671 | 17942587 | KD2-H4K8ac_peak_27630 | 9.95119  | ASAHI1_ENSG00000104763;CTD-2547L16.1_ENSG00000245281 |
| 8 | 18871501 | 18871833 | KD2-H4K8ac_peak_27631 | 8.17902  |                                                      |
| 8 | 18905103 | 18905316 | KD2-H4K8ac_peak_27632 | 5.08628  |                                                      |
| 8 | 19269534 | 19269952 | KD2-H4K8ac_peak_27633 | 4.73064  |                                                      |
| 8 | 19675012 | 19675263 | KD2-H4K8ac_peak_27634 | 9.11031  | INTS10_ENSG00000104613                               |
| 8 | 19706241 | 19706465 | KD2-H4K8ac_peak_27635 | 7.01964  |                                                      |
| 8 | 20054475 | 20054683 | KD2-H4K8ac_peak_27636 | 9.65086  | ATP6V1B2_ENSG00000147416                             |
| 8 | 20081563 | 20081839 | KD2-H4K8ac_peak_27637 | 9.59147  |                                                      |
| 8 | 20092248 | 20092755 | KD2-H4K8ac_peak_27638 | 7.51945  |                                                      |
| 8 | 20124635 | 20125351 | KD2-H4K8ac_peak_27639 | 8.30974  |                                                      |
| 8 | 20161667 | 20162115 | KD2-H4K8ac_peak_27640 | 5.30799  | LZTS1_ENSG00000061337                                |
| 8 | 20186101 | 20186759 | KD2-H4K8ac_peak_27641 | 7.59643  |                                                      |
| 8 | 21524426 | 21524739 | KD2-H4K8ac_peak_27642 | 4.9025   |                                                      |
| 8 | 21777278 | 21777492 | KD2-H4K8ac_peak_27643 | 10.46264 | XPO7_ENSG00000130227                                 |
| 8 | 21866724 | 21866919 | KD2-H4K8ac_peak_27644 | 4.01115  |                                                      |

|   |          |          |                       |          |                                                |
|---|----------|----------|-----------------------|----------|------------------------------------------------|
| 8 | 21867175 | 21867661 | KD2-H4K8ac_peak_27645 | 17.21106 |                                                |
| 8 | 21867905 | 21868683 | KD2-H4K8ac_peak_27646 | 18.7894  |                                                |
| 8 | 21894550 | 21894866 | KD2-H4K8ac_peak_27647 | 7.76329  |                                                |
| 8 | 21901622 | 21901892 | KD2-H4K8ac_peak_27648 | 10.05606 |                                                |
| 8 | 21912878 | 21913099 | KD2-H4K8ac_peak_27649 | 7.31433  |                                                |
| 8 | 21913795 | 21914120 | KD2-H4K8ac_peak_27650 | 10.19949 |                                                |
| 8 | 21914633 | 21916534 | KD2-H4K8ac_peak_27651 | 26.7824  |                                                |
| 8 | 21917006 | 21917666 | KD2-H4K8ac_peak_27652 | 10.88013 |                                                |
| 8 | 21917978 | 21918222 | KD2-H4K8ac_peak_27653 | 6.90231  |                                                |
| 8 | 21923621 | 21924367 | KD2-H4K8ac_peak_27654 | 8.55271  |                                                |
| 8 | 21924600 | 21925016 | KD2-H4K8ac_peak_27655 | 5.54647  |                                                |
| 8 | 21946292 | 21947297 | KD2-H4K8ac_peak_27656 | 12.00597 | FAM160B2_ENSG00000158863                       |
| 8 | 21967005 | 21967402 | KD2-H4K8ac_peak_27657 | 10.96455 | NUDT18_ENSG00000173566                         |
| 8 | 21967710 | 21968066 | KD2-H4K8ac_peak_27658 | 6.25869  | NUDT18_ENSG00000173566                         |
| 8 | 21990436 | 21991141 | KD2-H4K8ac_peak_27659 | 8.62963  | HR_ENSG00000168453                             |
| 8 | 21999061 | 21999339 | KD2-H4K8ac_peak_27660 | 7.70067  | REEP4_ENSG00000168476                          |
| 8 | 22022700 | 22023105 | KD2-H4K8ac_peak_27661 | 9.1707   | BMP1_ENSG00000168487                           |
| 8 | 22059164 | 22059639 | KD2-H4K8ac_peak_27662 | 6.55628  |                                                |
| 8 | 22068084 | 22069774 | KD2-H4K8ac_peak_27663 | 10.98959 |                                                |
| 8 | 22070181 | 22070976 | KD2-H4K8ac_peak_27664 | 6.67092  |                                                |
| 8 | 22089293 | 22089898 | KD2-H4K8ac_peak_27665 | 6.65673  | PHYHIP_ENSG00000168490                         |
| 8 | 22090154 | 22090350 | KD2-H4K8ac_peak_27666 | 8.59579  | PHYHIP_ENSG00000168490                         |
| 8 | 22102286 | 22103106 | KD2-H4K8ac_peak_27667 | 12.30509 | MIR320A_ENSG00000208037;POLR3D_ENSG00000168495 |
| 8 | 22224463 | 22224680 | KD2-H4K8ac_peak_27668 | 9.65086  | SLC39A14_ENSG00000104635                       |
| 8 | 22224914 | 22225339 | KD2-H4K8ac_peak_27669 | 6.84261  | SLC39A14_ENSG00000104635                       |
| 8 | 22255581 | 22255947 | KD2-H4K8ac_peak_27670 | 5.20998  |                                                |
| 8 | 22297655 | 22298439 | KD2-H4K8ac_peak_27671 | 23.33626 | PPP3CC_ENSG00000120910                         |
| 8 | 22298633 | 22299163 | KD2-H4K8ac_peak_27672 | 14.275   | PPP3CC_ENSG00000120910                         |
| 8 | 22408804 | 22409184 | KD2-H4K8ac_peak_27673 | 7.01494  |                                                |
| 8 | 22418755 | 22419266 | KD2-H4K8ac_peak_27674 | 8.85813  |                                                |
| 8 | 22422570 | 22423952 | KD2-H4K8ac_peak_27675 | 20.47719 | RP11-582J16.3_ENSG00000254230                  |
| 8 | 22446148 | 22446354 | KD2-H4K8ac_peak_27676 | 4.75829  | AC037459.4_ENSG00000248235                     |
| 8 | 22446867 | 22447444 | KD2-H4K8ac_peak_27677 | 4.54006  | AC037459.4_ENSG00000248235                     |
| 8 | 22455870 | 22456524 | KD2-H4K8ac_peak_27678 | 12.93209 | C8orf58_ENSG00000241852                        |
| 8 | 22457257 | 22457772 | KD2-H4K8ac_peak_27679 | 11.89502 | C8orf58_ENSG00000241852                        |
| 8 | 22461255 | 22462060 | KD2-H4K8ac_peak_27680 | 17.14886 | CCAR2_ENSG00000158941                          |
| 8 | 22462275 | 22462840 | KD2-H4K8ac_peak_27681 | 20.59319 | CCAR2_ENSG00000158941                          |
| 8 | 22516131 | 22516532 | KD2-H4K8ac_peak_27682 | 3.75035  |                                                |
| 8 | 22526764 | 22526970 | KD2-H4K8ac_peak_27683 | 8.79106  | BIN3_ENSG00000147439                           |
| 8 | 22527308 | 22527761 | KD2-H4K8ac_peak_27684 | 4.95193  | BIN3_ENSG00000147439                           |
| 8 | 22551960 | 22552559 | KD2-H4K8ac_peak_27685 | 12.84642 |                                                |
| 8 | 22553106 | 22553599 | KD2-H4K8ac_peak_27686 | 9.73431  |                                                |
| 8 | 22722515 | 22723519 | KD2-H4K8ac_peak_27687 | 15.81711 |                                                |
| 8 | 22724889 | 22726184 | KD2-H4K8ac_peak_27688 | 11.05407 |                                                |
| 8 | 22768825 | 22769089 | KD2-H4K8ac_peak_27689 | 6.99815  |                                                |
| 8 | 22853423 | 22853772 | KD2-H4K8ac_peak_27690 | 9.11031  |                                                |

|   |          |          |                       |          |                                                          |
|---|----------|----------|-----------------------|----------|----------------------------------------------------------|
| 8 | 22854211 | 22854682 | KD2-H4K8ac_peak_27691 | 6.40683  |                                                          |
| 8 | 22856425 | 22856883 | KD2-H4K8ac_peak_27692 | 8.1718   | PEBP4_ENSG00000134020                                    |
| 8 | 22857594 | 22857818 | KD2-H4K8ac_peak_27693 | 9.11031  | PEBP4_ENSG00000134020                                    |
| 8 | 22876544 | 22876840 | KD2-H4K8ac_peak_27694 | 8.79106  | RP11-875O11.1_ENSG00000245025                            |
| 8 | 22878017 | 22878273 | KD2-H4K8ac_peak_27695 | 6.40683  |                                                          |
| 8 | 22925470 | 22926468 | KD2-H4K8ac_peak_27696 | 8.4716   | TNFRSF10B_ENSG00000120889;RP11-875O11.2_ENSG00000246130  |
| 8 | 22941932 | 22942151 | KD2-H4K8ac_peak_27697 | 4.86324  | TNFRSF10C_ENSG00000173535                                |
| 8 | 23081969 | 23082560 | KD2-H4K8ac_peak_27698 | 11.30637 | TNFRSF10A_ENSG00000104689;RP11-1149O23.3_ENSG00000246582 |
| 8 | 23103570 | 23103892 | KD2-H4K8ac_peak_27699 | 11.05407 |                                                          |
| 8 | 23129638 | 23130093 | KD2-H4K8ac_peak_27700 | 9.34989  |                                                          |
| 8 | 23145669 | 23146040 | KD2-H4K8ac_peak_27701 | 13.31016 |                                                          |
| 8 | 23192566 | 23193462 | KD2-H4K8ac_peak_27702 | 11.89502 | RP11-177H13.2_ENSG00000253837                            |
| 8 | 23193745 | 23194074 | KD2-H4K8ac_peak_27703 | 19.6416  | RP11-177H13.2_ENSG00000253837                            |
| 8 | 23196173 | 23196852 | KD2-H4K8ac_peak_27704 | 3.75035  |                                                          |
| 8 | 23197073 | 23197314 | KD2-H4K8ac_peak_27705 | 4.77079  |                                                          |
| 8 | 23221365 | 23221584 | KD2-H4K8ac_peak_27706 | 5.30799  |                                                          |
| 8 | 23224303 | 23225847 | KD2-H4K8ac_peak_27707 | 14.8314  |                                                          |
| 8 | 23315396 | 23315684 | KD2-H4K8ac_peak_27708 | 7.36799  | CTC-756D1.2_ENSG00000253390;ENTPD4_ENSG00000197217       |
| 8 | 24799069 | 24799474 | KD2-H4K8ac_peak_27709 | 8.30974  |                                                          |
| 8 | 24799737 | 24800096 | KD2-H4K8ac_peak_27710 | 9.36516  |                                                          |
| 8 | 24813507 | 24814024 | KD2-H4K8ac_peak_27711 | 8.5092   | NEFL_ENSG00000104725;CTD-2168K21.2_ENSG00000272157       |
| 8 | 24854079 | 24854564 | KD2-H4K8ac_peak_27712 | 6.8836   |                                                          |
| 8 | 24855574 | 24856189 | KD2-H4K8ac_peak_27713 | 11.03331 |                                                          |
| 8 | 24857981 | 24858571 | KD2-H4K8ac_peak_27714 | 12.46522 |                                                          |
| 8 | 24907266 | 24907647 | KD2-H4K8ac_peak_27715 | 7.01964  |                                                          |
| 8 | 24909937 | 24910153 | KD2-H4K8ac_peak_27716 | 6.25869  |                                                          |
| 8 | 25042277 | 25042623 | KD2-H4K8ac_peak_27717 | 9.51625  | DOCK5_ENSG00000147459                                    |
| 8 | 25316519 | 25317006 | KD2-H4K8ac_peak_27718 | 12.00273 | KCTD9_ENSG00000104756;CDCA2_ENSG00000184661              |
| 8 | 25903091 | 25903332 | KD2-H4K8ac_peak_27719 | 8.85813  | EBF2_ENSG00000221818                                     |
| 8 | 26148522 | 26148898 | KD2-H4K8ac_peak_27720 | 10.08707 | PPP2R2A_ENSG00000221914                                  |
| 8 | 26306438 | 26306688 | KD2-H4K8ac_peak_27721 | 7.47462  |                                                          |
| 8 | 26307167 | 26307827 | KD2-H4K8ac_peak_27722 | 15.59774 |                                                          |
| 8 | 26339031 | 26339278 | KD2-H4K8ac_peak_27723 | 6.31143  |                                                          |
| 8 | 26371116 | 26371379 | KD2-H4K8ac_peak_27724 | 5.30799  | PNMA2_ENSG00000240694;DPYSL2_ENSG00000092964             |
| 8 | 26372318 | 26372913 | KD2-H4K8ac_peak_27725 | 6.83936  | PNMA2_ENSG00000240694;DPYSL2_ENSG00000092964             |
| 8 | 26428986 | 26429341 | KD2-H4K8ac_peak_27726 | 5.75757  |                                                          |
| 8 | 26434345 | 26435197 | KD2-H4K8ac_peak_27727 | 11.82518 |                                                          |
| 8 | 26436062 | 26436839 | KD2-H4K8ac_peak_27728 | 8.30974  |                                                          |
| 8 | 26470769 | 26471037 | KD2-H4K8ac_peak_27729 | 4.77079  |                                                          |
| 8 | 26920717 | 26921497 | KD2-H4K8ac_peak_27730 | 9.15329  |                                                          |
| 8 | 27169255 | 27169531 | KD2-H4K8ac_peak_27731 | 10.65724 | TRIM35_ENSG00000104228;PTK2B_ENSG00000120899             |
| 8 | 27348711 | 27349274 | KD2-H4K8ac_peak_27732 | 10.86378 | EPHX2_ENSG00000120915                                    |
| 8 | 27449976 | 27450176 | KD2-H4K8ac_peak_27733 | 6.99815  |                                                          |
| 8 | 27472124 | 27472605 | KD2-H4K8ac_peak_27734 | 4.211    | CLU_ENSG00000120885                                      |
| 8 | 27491031 | 27491910 | KD2-H4K8ac_peak_27735 | 14.04511 | SCARA3_ENSG00000168077                                   |
| 8 | 27560361 | 27560749 | KD2-H4K8ac_peak_27736 | 5.25071  |                                                          |

|   |          |          |                       |          |                                                   |
|---|----------|----------|-----------------------|----------|---------------------------------------------------|
| 8 | 27629385 | 27630161 | KD2-H4K8ac_peak_27737 | 9.1707   | CCDC25_ENSG00000147419;ESCO2_ENSG00000171320      |
| 8 | 27694962 | 27695192 | KD2-H4K8ac_peak_27738 | 4.86324  | PBK_ENSG00000168078;RP11-1149M3.2_ENSG00000253176 |
| 8 | 27695471 | 27696153 | KD2-H4K8ac_peak_27739 | 8.02571  | PBK_ENSG00000168078;RP11-1149M3.2_ENSG00000253176 |
| 8 | 27749676 | 27750070 | KD2-H4K8ac_peak_27740 | 8.94415  |                                                   |
| 8 | 27750385 | 27751043 | KD2-H4K8ac_peak_27741 | 10.96455 |                                                   |
| 8 | 27751898 | 27752544 | KD2-H4K8ac_peak_27742 | 17.16047 |                                                   |
| 8 | 27752799 | 27753862 | KD2-H4K8ac_peak_27743 | 11.24702 |                                                   |
| 8 | 27839968 | 27840290 | KD2-H4K8ac_peak_27744 | 8.78496  |                                                   |
| 8 | 27930994 | 27931246 | KD2-H4K8ac_peak_27745 | 3.75035  |                                                   |
| 8 | 27950453 | 27950886 | KD2-H4K8ac_peak_27746 | 7.07117  |                                                   |
| 8 | 28040952 | 28041234 | KD2-H4K8ac_peak_27747 | 4.09222  |                                                   |
| 8 | 28060427 | 28060710 | KD2-H4K8ac_peak_27748 | 11.89502 |                                                   |
| 8 | 28165924 | 28166135 | KD2-H4K8ac_peak_27749 | 5.54647  |                                                   |
| 8 | 28182058 | 28182330 | KD2-H4K8ac_peak_27750 | 5.71749  |                                                   |
| 8 | 28186449 | 28186692 | KD2-H4K8ac_peak_27751 | 4.66652  |                                                   |
| 8 | 28242924 | 28243684 | KD2-H4K8ac_peak_27752 | 8.94469  |                                                   |
| 8 | 28244073 | 28244343 | KD2-H4K8ac_peak_27753 | 10.39154 |                                                   |
| 8 | 28258631 | 28259223 | KD2-H4K8ac_peak_27754 | 8.6308   | ZNF395_ENSG00000186918                            |
| 8 | 28259972 | 28260315 | KD2-H4K8ac_peak_27755 | 14.98936 | ZNF395_ENSG00000186918                            |
| 8 | 28269236 | 28270030 | KD2-H4K8ac_peak_27756 | 15.13261 |                                                   |
| 8 | 28351266 | 28351577 | KD2-H4K8ac_peak_27757 | 11.05467 | FZD3_ENSG00000104290                              |
| 8 | 28351872 | 28352519 | KD2-H4K8ac_peak_27758 | 14.71663 | FZD3_ENSG00000104290                              |
| 8 | 28458436 | 28458664 | KD2-H4K8ac_peak_27759 | 5.88845  | EXTL3_ENSG00000012232                             |
| 8 | 28459057 | 28459328 | KD2-H4K8ac_peak_27760 | 9.36621  |                                                   |
| 8 | 28558293 | 28558822 | KD2-H4K8ac_peak_27761 | 10.53377 | EXTL3-AS1_ENSG00000246339                         |
| 8 | 28559220 | 28559511 | KD2-H4K8ac_peak_27762 | 11.80283 | EXTL3-AS1_ENSG00000246339                         |
| 8 | 28701951 | 28702226 | KD2-H4K8ac_peak_27763 | 5.25071  |                                                   |
| 8 | 28748206 | 28748439 | KD2-H4K8ac_peak_27764 | 9.51625  | INTS9_ENSG00000104299;HMBOX1_ENSG00000147421      |
| 8 | 28809219 | 28809423 | KD2-H4K8ac_peak_27765 | 4.3015   |                                                   |
| 8 | 28815141 | 28815508 | KD2-H4K8ac_peak_27766 | 7.76329  |                                                   |
| 8 | 29119955 | 29120549 | KD2-H4K8ac_peak_27767 | 9.08816  | KIF13B_ENSG00000197892                            |
| 8 | 29207831 | 29208152 | KD2-H4K8ac_peak_27768 | 5.88845  | DUSP4_ENSG00000120875                             |
| 8 | 29208519 | 29209031 | KD2-H4K8ac_peak_27769 | 11.19034 | DUSP4_ENSG00000120875                             |
| 8 | 29209412 | 29210582 | KD2-H4K8ac_peak_27770 | 17.8868  | RP4-676L2.1_ENSG00000260253                       |
| 8 | 29230152 | 29231058 | KD2-H4K8ac_peak_27771 | 6.52179  |                                                   |
| 8 | 29317510 | 29317974 | KD2-H4K8ac_peak_27772 | 5.57044  |                                                   |
| 8 | 29593971 | 29594172 | KD2-H4K8ac_peak_27773 | 7.71478  |                                                   |
| 8 | 29594759 | 29595071 | KD2-H4K8ac_peak_27774 | 4.77079  |                                                   |
| 8 | 29595382 | 29596325 | KD2-H4K8ac_peak_27775 | 14.8083  |                                                   |
| 8 | 29618106 | 29618458 | KD2-H4K8ac_peak_27776 | 7.45501  |                                                   |
| 8 | 29623076 | 29623311 | KD2-H4K8ac_peak_27777 | 4.77079  |                                                   |
| 8 | 29628311 | 29628614 | KD2-H4K8ac_peak_27778 | 9.36516  |                                                   |
| 8 | 29629772 | 29631610 | KD2-H4K8ac_peak_27779 | 19.72117 |                                                   |
| 8 | 29632165 | 29632456 | KD2-H4K8ac_peak_27780 | 8.37231  |                                                   |
| 8 | 29633590 | 29633799 | KD2-H4K8ac_peak_27781 | 5.61067  |                                                   |
| 8 | 29635590 | 29635856 | KD2-H4K8ac_peak_27782 | 5.34946  |                                                   |



|   |          |          |                       |          |                                                   |
|---|----------|----------|-----------------------|----------|---------------------------------------------------|
| 8 | 29637643 | 29638072 | KD2-H4K8ac_peak_27783 | 6.31143  |                                                   |
| 8 | 29662898 | 29663187 | KD2-H4K8ac_peak_27784 | 9.73431  |                                                   |
| 8 | 29664737 | 29664972 | KD2-H4K8ac_peak_27785 | 8.30974  |                                                   |
| 8 | 29684602 | 29684817 | KD2-H4K8ac_peak_27786 | 6.50927  |                                                   |
| 8 | 29685866 | 29686270 | KD2-H4K8ac_peak_27787 | 7.52168  |                                                   |
| 8 | 29707265 | 29707466 | KD2-H4K8ac_peak_27788 | 3.75035  |                                                   |
| 8 | 29737941 | 29738337 | KD2-H4K8ac_peak_27789 | 17.16047 |                                                   |
| 8 | 29739034 | 29739264 | KD2-H4K8ac_peak_27790 | 5.54647  |                                                   |
| 8 | 29743643 | 29744463 | KD2-H4K8ac_peak_27791 | 5.30799  |                                                   |
| 8 | 29752275 | 29752755 | KD2-H4K8ac_peak_27792 | 6.8836   |                                                   |
| 8 | 29858060 | 29858363 | KD2-H4K8ac_peak_27793 | 5.25071  |                                                   |
| 8 | 29952094 | 29953657 | KD2-H4K8ac_peak_27794 | 8.80432  | LEPROTL1_ENSG00000104660                          |
| 8 | 29994310 | 29994821 | KD2-H4K8ac_peak_27795 | 6.61376  |                                                   |
| 8 | 30013605 | 30014427 | KD2-H4K8ac_peak_27796 | 7.76104  | RP11-51J9.5_ENSG00000271869;DCTN6_ENSG00000104671 |
| 8 | 30073295 | 30073554 | KD2-H4K8ac_peak_27797 | 6.75638  |                                                   |
| 8 | 30241406 | 30242868 | KD2-H4K8ac_peak_27798 | 10.05606 | RBPM5-AS1_ENSG00000254109;RBPM5_ENSG00000157110   |
| 8 | 30281275 | 30281660 | KD2-H4K8ac_peak_27799 | 8.70735  |                                                   |
| 8 | 30585021 | 30585563 | KD2-H4K8ac_peak_27800 | 8.10216  | GSR_ENSG00000104687                               |
| 8 | 30600674 | 30600909 | KD2-H4K8ac_peak_27801 | 6.30229  |                                                   |
| 8 | 30601246 | 30602501 | KD2-H4K8ac_peak_27802 | 9.26408  |                                                   |
| 8 | 30607914 | 30608136 | KD2-H4K8ac_peak_27803 | 5.45396  |                                                   |
| 8 | 30670103 | 30670308 | KD2-H4K8ac_peak_27804 | 14.39182 |                                                   |
| 8 | 30890803 | 30891073 | KD2-H4K8ac_peak_27805 | 4.86324  | PURG_ENSG00000172733;WRN_ENSG00000165392          |
| 8 | 31497799 | 31498010 | KD2-H4K8ac_peak_27806 | 6.20982  | NRG1_ENSG00000157168                              |
| 8 | 32405753 | 32406025 | KD2-H4K8ac_peak_27807 | 9.02371  |                                                   |
| 8 | 32504059 | 32504274 | KD2-H4K8ac_peak_27808 | 5.75452  |                                                   |
| 8 | 32641641 | 32641858 | KD2-H4K8ac_peak_27809 | 4.86824  |                                                   |
| 8 | 33203142 | 33203556 | KD2-H4K8ac_peak_27810 | 7.05877  |                                                   |
| 8 | 33210813 | 33211282 | KD2-H4K8ac_peak_27811 | 5.25071  |                                                   |
| 8 | 33330902 | 33331162 | KD2-H4K8ac_peak_27812 | 8.37231  | FUT10_ENSG00000172728                             |
| 8 | 33341943 | 33342493 | KD2-H4K8ac_peak_27813 | 19.55721 | MAK16_ENSG00000198042                             |
| 8 | 33371911 | 33372327 | KD2-H4K8ac_peak_27814 | 6.56926  | TTI2_ENSG00000129696;SNORD13_ENSG00000239039      |
| 8 | 33423161 | 33423705 | KD2-H4K8ac_peak_27815 | 6.60096  | RNF122_ENSG00000133874                            |
| 8 | 33424864 | 33425224 | KD2-H4K8ac_peak_27816 | 11.16154 | RNF122_ENSG00000133874                            |
| 8 | 33456117 | 33457210 | KD2-H4K8ac_peak_27817 | 9.63487  | DUSP26_ENSG00000133878                            |
| 8 | 33457466 | 33458270 | KD2-H4K8ac_peak_27818 | 10.46264 | DUSP26_ENSG00000133878                            |
| 8 | 35402932 | 35403132 | KD2-H4K8ac_peak_27819 | 9.02371  |                                                   |
| 8 | 35763939 | 35764252 | KD2-H4K8ac_peak_27820 | 4.42765  |                                                   |
| 8 | 36930106 | 36930702 | KD2-H4K8ac_peak_27821 | 9.51688  |                                                   |
| 8 | 36931312 | 36931685 | KD2-H4K8ac_peak_27822 | 7.1181   |                                                   |
| 8 | 36957237 | 36957906 | KD2-H4K8ac_peak_27823 | 11.05407 |                                                   |
| 8 | 37104072 | 37104314 | KD2-H4K8ac_peak_27824 | 8.37231  |                                                   |
| 8 | 37183494 | 37183907 | KD2-H4K8ac_peak_27825 | 6.14031  |                                                   |
| 8 | 37184254 | 37184470 | KD2-H4K8ac_peak_27826 | 5.88845  |                                                   |
| 8 | 37200033 | 37200263 | KD2-H4K8ac_peak_27827 | 6.16888  |                                                   |
| 8 | 37344405 | 37344641 | KD2-H4K8ac_peak_27828 | 6.40683  |                                                   |

|   |          |          |                       |          |                                                       |
|---|----------|----------|-----------------------|----------|-------------------------------------------------------|
| 8 | 37373963 | 37374177 | KD2-H4K8ac_peak_27829 | 6.55628  | RP11-150O12.6_ENSG00000253414                         |
| 8 | 37552662 | 37553142 | KD2-H4K8ac_peak_27830 | 9.08816  | ZNF703_ENSG00000183779                                |
| 8 | 37568891 | 37569113 | KD2-H4K8ac_peak_27831 | 5.15777  |                                                       |
| 8 | 37593477 | 37593863 | KD2-H4K8ac_peak_27832 | 10.96455 | ERLIN2_ENSG00000147475                                |
| 8 | 37594180 | 37594638 | KD2-H4K8ac_peak_27833 | 18.54875 | RP11-863K10.7_ENSG00000183154;ERLIN2_ENSG00000147475  |
| 8 | 37619662 | 37619965 | KD2-H4K8ac_peak_27834 | 16.07006 | PROSC_ENSG00000147471                                 |
| 8 | 37640108 | 37640449 | KD2-H4K8ac_peak_27835 | 4.42765  |                                                       |
| 8 | 37641690 | 37642292 | KD2-H4K8ac_peak_27836 | 11.79585 | GPR124_ENSG0000020181                                 |
| 8 | 37653566 | 37654191 | KD2-H4K8ac_peak_27837 | 10.19949 |                                                       |
| 8 | 37654484 | 37656893 | KD2-H4K8ac_peak_27838 | 13.30514 |                                                       |
| 8 | 37659380 | 37659747 | KD2-H4K8ac_peak_27839 | 15.08751 |                                                       |
| 8 | 37659981 | 37661438 | KD2-H4K8ac_peak_27840 | 9.44322  |                                                       |
| 8 | 37661794 | 37662000 | KD2-H4K8ac_peak_27841 | 6.80057  |                                                       |
| 8 | 37679543 | 37679863 | KD2-H4K8ac_peak_27842 | 3.86308  |                                                       |
| 8 | 37683870 | 37684119 | KD2-H4K8ac_peak_27843 | 12.46522 |                                                       |
| 8 | 37707009 | 37707294 | KD2-H4K8ac_peak_27844 | 9.08816  | BRF2_ENSG00000104221                                  |
| 8 | 37713800 | 37714098 | KD2-H4K8ac_peak_27845 | 4.8402   |                                                       |
| 8 | 37732057 | 37732325 | KD2-H4K8ac_peak_27846 | 6.00226  |                                                       |
| 8 | 37887587 | 37887838 | KD2-H4K8ac_peak_27847 | 8.10216  | EIF4EBP1_ENSG00000187840                              |
| 8 | 37888059 | 37889594 | KD2-H4K8ac_peak_27848 | 21.54694 | EIF4EBP1_ENSG00000187840                              |
| 8 | 38008349 | 38008588 | KD2-H4K8ac_peak_27849 | 8.30974  | STAR_ENSG00000147465                                  |
| 8 | 38033481 | 38034624 | KD2-H4K8ac_peak_27850 | 8.36432  | LSM1_ENSG00000175324;BAG4_ENSG00000156735             |
| 8 | 38089191 | 38089816 | KD2-H4K8ac_peak_27851 | 13.12288 |                                                       |
| 8 | 38126309 | 38126666 | KD2-H4K8ac_peak_27852 | 5.54647  | PPAPDC1B_ENSG00000147535                              |
| 8 | 38239366 | 38239694 | KD2-H4K8ac_peak_27853 | 8.79106  | WHSC1L1_ENSG00000147548;RP11-350N15.5_ENSG00000272092 |
| 8 | 38239993 | 38240863 | KD2-H4K8ac_peak_27854 | 17.8868  | WHSC1L1_ENSG00000147548;RP11-350N15.5_ENSG00000272092 |
| 8 | 38242929 | 38243199 | KD2-H4K8ac_peak_27855 | 5.18553  | LETM2_ENSG00000165046                                 |
| 8 | 38244470 | 38244680 | KD2-H4K8ac_peak_27856 | 6.25869  | LETM2_ENSG00000165046                                 |
| 8 | 38265803 | 38266288 | KD2-H4K8ac_peak_27857 | 8.82427  | RP11-350N15.6_ENSG00000272159                         |
| 8 | 38298272 | 38298495 | KD2-H4K8ac_peak_27858 | 7.27716  |                                                       |
| 8 | 38329401 | 38330212 | KD2-H4K8ac_peak_27859 | 6.65673  |                                                       |
| 8 | 38374284 | 38374513 | KD2-H4K8ac_peak_27860 | 9.15329  |                                                       |
| 8 | 38386150 | 38386584 | KD2-H4K8ac_peak_27861 | 5.15777  | C8orf86_ENSG00000196166                               |
| 8 | 38483717 | 38484233 | KD2-H4K8ac_peak_27862 | 5.93446  |                                                       |
| 8 | 38501922 | 38502277 | KD2-H4K8ac_peak_27863 | 5.73839  |                                                       |
| 8 | 38570275 | 38570606 | KD2-H4K8ac_peak_27864 | 5.14125  |                                                       |
| 8 | 38577266 | 38577739 | KD2-H4K8ac_peak_27865 | 8.17902  |                                                       |
| 8 | 38592852 | 38593126 | KD2-H4K8ac_peak_27866 | 10.48739 |                                                       |
| 8 | 38758290 | 38758553 | KD2-H4K8ac_peak_27867 | 5.88845  | PLEKHA2_ENSG00000169499                               |
| 8 | 38758748 | 38759207 | KD2-H4K8ac_peak_27868 | 22.76112 | PLEKHA2_ENSG00000169499                               |
| 8 | 38771001 | 38771568 | KD2-H4K8ac_peak_27869 | 7.87794  |                                                       |
| 8 | 38781875 | 38782106 | KD2-H4K8ac_peak_27870 | 6.25869  |                                                       |
| 8 | 38794394 | 38795351 | KD2-H4K8ac_peak_27871 | 20.97251 |                                                       |
| 8 | 38795656 | 38796403 | KD2-H4K8ac_peak_27872 | 17.82278 |                                                       |
| 8 | 38854569 | 38854773 | KD2-H4K8ac_peak_27873 | 8.34752  | TM2D2_ENSG00000169490;ADAM9_ENSG00000168615           |
| 8 | 40634877 | 40635205 | KD2-H4K8ac_peak_27874 | 5.54647  |                                                       |

|   |          |          |                       |          |                                                                      |
|---|----------|----------|-----------------------|----------|----------------------------------------------------------------------|
| 8 | 40789717 | 40790449 | KD2-H4K8ac_peak_27875 | 5.20908  |                                                                      |
| 8 | 41166662 | 41166966 | KD2-H4K8ac_peak_27876 | 7.76104  | SFRP1_ENSG00000104332                                                |
| 8 | 41322541 | 41323401 | KD2-H4K8ac_peak_27877 | 6.40683  |                                                                      |
| 8 | 41323653 | 41324146 | KD2-H4K8ac_peak_27878 | 7.76335  |                                                                      |
| 8 | 41347294 | 41347595 | KD2-H4K8ac_peak_27879 | 7.76104  | GOLGA7_ENSG00000147533                                               |
| 8 | 41386176 | 41386438 | KD2-H4K8ac_peak_27880 | 8.37231  | GINS4_ENSG00000147536                                                |
| 8 | 41401338 | 41401539 | KD2-H4K8ac_peak_27881 | 7.5554   |                                                                      |
| 8 | 41427024 | 41427403 | KD2-H4K8ac_peak_27882 | 11.30637 |                                                                      |
| 8 | 41435140 | 41435362 | KD2-H4K8ac_peak_27883 | 6.40874  | RP11-360L9.4_ENSG00000253133;AGPAT6_ENSG00000158669                  |
| 8 | 41435813 | 41436164 | KD2-H4K8ac_peak_27884 | 6.2827   | RP11-360L9.4_ENSG00000253133                                         |
| 8 | 41503891 | 41504215 | KD2-H4K8ac_peak_27885 | 3.86308  |                                                                      |
| 8 | 41559126 | 41559349 | KD2-H4K8ac_peak_27886 | 9.65086  |                                                                      |
| 8 | 41649324 | 41649841 | KD2-H4K8ac_peak_27887 | 7.1181   |                                                                      |
| 8 | 41997202 | 41997571 | KD2-H4K8ac_peak_27888 | 7.40111  | RP11-589C21.6_ENSG00000271938                                        |
| 8 | 42009795 | 42010100 | KD2-H4K8ac_peak_27889 | 13.35993 | RP11-589C21.5_ENSG00000261449;AP3M2_ENSG00000070718                  |
| 8 | 42065381 | 42065677 | KD2-H4K8ac_peak_27890 | 7.47462  | PLAT_ENSG00000104368                                                 |
| 8 | 42073018 | 42073304 | KD2-H4K8ac_peak_27891 | 4.70206  |                                                                      |
| 8 | 42128285 | 42128814 | KD2-H4K8ac_peak_27892 | 9.96798  | RP11-231D20.2_ENSG00000253408;IKBKB_ENSG00000104365                  |
| 8 | 42129060 | 42129333 | KD2-H4K8ac_peak_27893 | 8.83582  | RP11-231D20.2_ENSG00000253408;IKBKB_ENSG00000104365                  |
| 8 | 42196047 | 42196440 | KD2-H4K8ac_peak_27894 | 12.42547 | POLB_ENSG00000070501                                                 |
| 8 | 42248438 | 42249206 | KD2-H4K8ac_peak_27895 | 14.66631 | VDAC3_ENSG00000078668                                                |
| 8 | 42249445 | 42249865 | KD2-H4K8ac_peak_27896 | 12.57143 | VDAC3_ENSG00000078668                                                |
| 8 | 42270300 | 42270580 | KD2-H4K8ac_peak_27897 | 6.09229  |                                                                      |
| 8 | 42396308 | 42397345 | KD2-H4K8ac_peak_27898 | 7.36799  | SLC20A2_ENSG00000168575;SMIM19_ENSG00000176209                       |
| 8 | 42697661 | 42697916 | KD2-H4K8ac_peak_27899 | 8.25022  | THAP1_ENSG00000131931                                                |
| 8 | 42698168 | 42698449 | KD2-H4K8ac_peak_27900 | 12.93209 | THAP1_ENSG00000131931                                                |
| 8 | 42699199 | 42699430 | KD2-H4K8ac_peak_27901 | 8.02571  | THAP1_ENSG00000131931                                                |
| 8 | 42743234 | 42743477 | KD2-H4K8ac_peak_27902 | 6.00243  |                                                                      |
| 8 | 42751398 | 42751632 | KD2-H4K8ac_peak_27903 | 11.80283 | RNF170_ENSG00000120925;MIR4469_ENSG00000266044;HOOK3_ENSG00000168172 |
| 8 | 42752147 | 42752800 | KD2-H4K8ac_peak_27904 | 10.96455 | RNF170_ENSG00000120925;MIR4469_ENSG00000266044;HOOK3_ENSG00000168172 |
| 8 | 42911020 | 42911241 | KD2-H4K8ac_peak_27905 | 3.82395  |                                                                      |
| 8 | 42911513 | 42912070 | KD2-H4K8ac_peak_27906 | 14.00658 |                                                                      |
| 8 | 42948682 | 42949038 | KD2-H4K8ac_peak_27907 | 17.55491 | POMK_ENSG00000185900                                                 |
| 8 | 42995007 | 42995388 | KD2-H4K8ac_peak_27908 | 6.97919  | HGSNAT_ENSG00000165102                                               |
| 8 | 42995628 | 42996599 | KD2-H4K8ac_peak_27909 | 13.81781 | HGSNAT_ENSG00000165102                                               |
| 8 | 47528716 | 47529243 | KD2-H4K8ac_peak_27910 | 11.30637 |                                                                      |
| 8 | 48172684 | 48173788 | KD2-H4K8ac_peak_27911 | 17.25154 | SPIDR_ENSG00000164808                                                |
| 8 | 48872928 | 48873173 | KD2-H4K8ac_peak_27912 | 9.5456   | PRKDC_ENSG00000253729;MCM4_ENSG00000104738                           |
| 8 | 48873793 | 48874062 | KD2-H4K8ac_peak_27913 | 6.2781   |                                                                      |
| 8 | 48920394 | 48921415 | KD2-H4K8ac_peak_27914 | 21.75906 | UBE2V2_ENSG00000169139                                               |
| 8 | 49293277 | 49293542 | KD2-H4K8ac_peak_27915 | 3.97079  |                                                                      |
| 8 | 49427338 | 49427872 | KD2-H4K8ac_peak_27916 | 7.44324  |                                                                      |
| 8 | 49435835 | 49436067 | KD2-H4K8ac_peak_27917 | 5.14125  |                                                                      |
| 8 | 49494548 | 49494952 | KD2-H4K8ac_peak_27918 | 15.039   |                                                                      |
| 8 | 49586690 | 49587085 | KD2-H4K8ac_peak_27919 | 5.73839  |                                                                      |
| 8 | 49587456 | 49587709 | KD2-H4K8ac_peak_27920 | 5.14125  |                                                                      |

|   |          |          |                       |          |                                                                          |
|---|----------|----------|-----------------------|----------|--------------------------------------------------------------------------|
| 8 | 49612032 | 49612275 | KD2-H4K8ac_peak_27921 | 7.36933  |                                                                          |
| 8 | 49676685 | 49676926 | KD2-H4K8ac_peak_27922 | 5.16439  |                                                                          |
| 8 | 49782698 | 49783110 | KD2-H4K8ac_peak_27923 | 11.50346 |                                                                          |
| 8 | 52143315 | 52143551 | KD2-H4K8ac_peak_27924 | 7.76329  |                                                                          |
| 8 | 52557353 | 52557602 | KD2-H4K8ac_peak_27925 | 6.40683  |                                                                          |
| 8 | 52565698 | 52566061 | KD2-H4K8ac_peak_27926 | 8.17902  |                                                                          |
| 8 | 52568020 | 52568417 | KD2-H4K8ac_peak_27927 | 11.30637 |                                                                          |
| 8 | 52810863 | 52811503 | KD2-H4K8ac_peak_27928 | 18.38518 | PCMTD1_ENSG00000168300;RP11-110G21.1_ENSG00000228801                     |
| 8 | 54569768 | 54570342 | KD2-H4K8ac_peak_27929 | 14.15075 |                                                                          |
| 8 | 54570802 | 54571696 | KD2-H4K8ac_peak_27930 | 11.03331 |                                                                          |
| 8 | 54755580 | 54756360 | KD2-H4K8ac_peak_27931 | 15.58442 | ATP6V1H_ENSG00000047249                                                  |
| 8 | 54792154 | 54794103 | KD2-H4K8ac_peak_27932 | 8.43115  |                                                                          |
| 8 | 54816046 | 54816377 | KD2-H4K8ac_peak_27933 | 6.27931  |                                                                          |
| 8 | 54818042 | 54818477 | KD2-H4K8ac_peak_27934 | 5.9696   |                                                                          |
| 8 | 54819253 | 54819615 | KD2-H4K8ac_peak_27935 | 6.40683  |                                                                          |
| 8 | 54875794 | 54876004 | KD2-H4K8ac_peak_27936 | 10.21502 |                                                                          |
| 8 | 54934458 | 54934705 | KD2-H4K8ac_peak_27937 | 5.80249  | TCEA1_ENSG00000187735                                                    |
| 8 | 54935345 | 54935783 | KD2-H4K8ac_peak_27938 | 6.31143  | TCEA1_ENSG00000187735                                                    |
| 8 | 55013968 | 55014434 | KD2-H4K8ac_peak_27939 | 14.8083  | LYPLA1_ENSG00000120992                                                   |
| 8 | 55014702 | 55014944 | KD2-H4K8ac_peak_27940 | 10.63441 | LYPLA1_ENSG00000120992                                                   |
| 8 | 55047421 | 55047642 | KD2-H4K8ac_peak_27941 | 10.72656 | MRPL15_ENSG00000137547                                                   |
| 8 | 56685364 | 56685769 | KD2-H4K8ac_peak_27942 | 4.33139  | TMEM68_ENSG00000167904;TGS1_ENSG00000137574                              |
| 8 | 56757227 | 56757440 | KD2-H4K8ac_peak_27943 | 9.08816  |                                                                          |
| 8 | 56760867 | 56761090 | KD2-H4K8ac_peak_27944 | 7.27716  |                                                                          |
| 8 | 56762542 | 56762957 | KD2-H4K8ac_peak_27945 | 8.17902  |                                                                          |
| 8 | 56792435 | 56793141 | KD2-H4K8ac_peak_27946 | 10.53377 | LYN_ENSG00000254087                                                      |
| 8 | 56801822 | 56802018 | KD2-H4K8ac_peak_27947 | 4.65111  |                                                                          |
| 8 | 56826159 | 56827185 | KD2-H4K8ac_peak_27948 | 9.06369  |                                                                          |
| 8 | 56827921 | 56828382 | KD2-H4K8ac_peak_27949 | 13.92307 |                                                                          |
| 8 | 56829206 | 56829884 | KD2-H4K8ac_peak_27950 | 9.73431  |                                                                          |
| 8 | 56831248 | 56831482 | KD2-H4K8ac_peak_27951 | 13.23402 |                                                                          |
| 8 | 56831997 | 56832441 | KD2-H4K8ac_peak_27952 | 10.0692  |                                                                          |
| 8 | 56832710 | 56833129 | KD2-H4K8ac_peak_27953 | 5.77029  |                                                                          |
| 8 | 56840131 | 56840498 | KD2-H4K8ac_peak_27954 | 7.01964  |                                                                          |
| 8 | 56840708 | 56841023 | KD2-H4K8ac_peak_27955 | 8.00457  |                                                                          |
| 8 | 56843244 | 56843453 | KD2-H4K8ac_peak_27956 | 4.211    |                                                                          |
| 8 | 56986687 | 56987022 | KD2-H4K8ac_peak_27957 | 8.10216  | RPS20_ENSG0000008988;SNORD54_ENSG00000238650;CTA-397H3.3_ENSG00000253603 |
| 8 | 56987290 | 56987734 | KD2-H4K8ac_peak_27958 | 7.67504  | RPS20_ENSG0000008988;SNORD54_ENSG00000238650;CTA-397H3.3_ENSG00000253603 |
| 8 | 57124401 | 57124596 | KD2-H4K8ac_peak_27959 | 8.16906  | PLAG1_ENSG00000181690;CHCHD7_ENSG00000170791                             |
| 8 | 57906004 | 57906221 | KD2-H4K8ac_peak_27960 | 5.54647  | IMPAD1_ENSG00000104331                                                   |
| 8 | 57906856 | 57907153 | KD2-H4K8ac_peak_27961 | 5.25071  | IMPAD1_ENSG00000104331                                                   |
| 8 | 58907191 | 58907497 | KD2-H4K8ac_peak_27962 | 5.54647  | FAM110B_ENSG00000169122                                                  |
| 8 | 58986634 | 58987042 | KD2-H4K8ac_peak_27963 | 6.75638  |                                                                          |
| 8 | 59058239 | 59058994 | KD2-H4K8ac_peak_27964 | 8.10216  |                                                                          |
| 8 | 59323507 | 59324302 | KD2-H4K8ac_peak_27965 | 25.71759 | UBXN2B_ENSG00000215114                                                   |
| 8 | 59465865 | 59466185 | KD2-H4K8ac_peak_27966 | 16.3889  | SDCBP_ENSG00000137575                                                    |

|   |          |          |                       |          |                                                                          |
|---|----------|----------|-----------------------|----------|--------------------------------------------------------------------------|
| 8 | 59571563 | 59572837 | KD2-H4K8ac_peak_27967 | 22.36554 | NSMAF_ENSG00000035681                                                    |
| 8 | 59658363 | 59658857 | KD2-H4K8ac_peak_27968 | 8.45238  |                                                                          |
| 8 | 60029985 | 60030809 | KD2-H4K8ac_peak_27969 | 7.36799  | TOX_ENSG00000198846;RP11-25K19.1_ENSG00000167912                         |
| 8 | 60032057 | 60032264 | KD2-H4K8ac_peak_27970 | 10.46264 | TOX_ENSG00000198846;RP11-25K19.1_ENSG00000167912                         |
| 8 | 60032490 | 60032746 | KD2-H4K8ac_peak_27971 | 7.76329  | TOX_ENSG00000198846;RP11-25K19.1_ENSG00000167912                         |
| 8 | 61193588 | 61193977 | KD2-H4K8ac_peak_27972 | 4.211    | CA8_ENSG00000178538                                                      |
| 8 | 61325383 | 61325722 | KD2-H4K8ac_peak_27973 | 8.1718   |                                                                          |
| 8 | 61428909 | 61429318 | KD2-H4K8ac_peak_27974 | 15.53798 | RP11-163N6.2_ENSG00000251396;RAB2A_ENSG00000104388                       |
| 8 | 61429597 | 61430115 | KD2-H4K8ac_peak_27975 | 9.11891  | RP11-163N6.2_ENSG00000251396;RAB2A_ENSG00000104388                       |
| 8 | 61564161 | 61564783 | KD2-H4K8ac_peak_27976 | 10.43145 |                                                                          |
| 8 | 61590812 | 61591024 | KD2-H4K8ac_peak_27977 | 13.80019 | CHD7_ENSG00000171316                                                     |
| 8 | 61591468 | 61591756 | KD2-H4K8ac_peak_27978 | 15.66881 | CHD7_ENSG00000171316                                                     |
| 8 | 61592278 | 61592686 | KD2-H4K8ac_peak_27979 | 11.3923  | CHD7_ENSG00000171316                                                     |
| 8 | 61822219 | 61823021 | KD2-H4K8ac_peak_27980 | 16.54484 | AC022182.1_ENSG00000254777                                               |
| 8 | 61936332 | 61936532 | KD2-H4K8ac_peak_27981 | 6.86699  |                                                                          |
| 8 | 62051477 | 62052421 | KD2-H4K8ac_peak_27982 | 13.13969 |                                                                          |
| 8 | 62200720 | 62201074 | KD2-H4K8ac_peak_27983 | 12.74171 |                                                                          |
| 8 | 62626488 | 62627011 | KD2-H4K8ac_peak_27984 | 7.49599  | ASPH_ENSG00000198363;MIR4470_ENSG00000264408                             |
| 8 | 64081220 | 64081841 | KD2-H4K8ac_peak_27985 | 16.73922 | YTHDF3-AS1_ENSG00000270673;YTHDF3_ENSG00000185728                        |
| 8 | 65710738 | 65711650 | KD2-H4K8ac_peak_27986 | 9.63487  | CYP7B1_ENSG00000172817                                                   |
| 8 | 66055703 | 66056244 | KD2-H4K8ac_peak_27987 | 10.0692  |                                                                          |
| 8 | 66057254 | 66057502 | KD2-H4K8ac_peak_27988 | 5.86783  |                                                                          |
| 8 | 66057736 | 66057957 | KD2-H4K8ac_peak_27989 | 5.30799  |                                                                          |
| 8 | 66546088 | 66546319 | KD2-H4K8ac_peak_27990 | 5.9696   | ARMC1_ENSG00000104442                                                    |
| 8 | 66557029 | 66557389 | KD2-H4K8ac_peak_27991 | 10.05606 | MTFR1_ENSG00000066855                                                    |
| 8 | 66753453 | 66754210 | KD2-H4K8ac_peak_27992 | 8.30974  | PDE7A_ENSG00000205268;CTD-2532N20.1_ENSG00000272192                      |
| 8 | 66754429 | 66754765 | KD2-H4K8ac_peak_27993 | 10.29842 | PDE7A_ENSG00000205268;CTD-2532N20.1_ENSG00000272192                      |
| 8 | 67025844 | 67026148 | KD2-H4K8ac_peak_27994 | 16.61426 | AC084082.3_ENSG00000253190                                               |
| 8 | 67341294 | 67342055 | KD2-H4K8ac_peak_27995 | 4.67342  | RP11-346I3.4_ENSG00000246145;RRS1_ENSG00000179041;ADHFE1_ENSG00000147576 |
| 8 | 67434331 | 67434922 | KD2-H4K8ac_peak_27996 | 8.30974  |                                                                          |
| 8 | 67525841 | 67526035 | KD2-H4K8ac_peak_27997 | 11.05407 | MYBL1_ENSG00000185697                                                    |
| 8 | 67624564 | 67625493 | KD2-H4K8ac_peak_27998 | 15.22643 | SGK3_ENSG00000104205                                                     |
| 8 | 67783011 | 67783243 | KD2-H4K8ac_peak_27999 | 8.02571  | MCMDC2_ENSG00000178460                                                   |
| 8 | 67837971 | 67838428 | KD2-H4K8ac_peak_28000 | 6.24114  | SNHG6_ENSG00000245910                                                    |
| 8 | 68255697 | 68256435 | KD2-H4K8ac_peak_28001 | 9.63487  | ARFGEF1_ENSG00000066777;RP11-7F18.2_ENSG00000271966                      |
| 8 | 70907148 | 70907452 | KD2-H4K8ac_peak_28002 | 6.64891  |                                                                          |
| 8 | 71314775 | 71315047 | KD2-H4K8ac_peak_28003 | 16.14659 | NCOA2_ENSG00000140396                                                    |
| 8 | 71315370 | 71316746 | KD2-H4K8ac_peak_28004 | 19.43192 | NCOA2_ENSG00000140396                                                    |
| 8 | 71519722 | 71520538 | KD2-H4K8ac_peak_28005 | 11.89502 | TRAM1_ENSG00000067167;RP11-382J12.1_ENSG00000246366                      |
| 8 | 71581129 | 71581382 | KD2-H4K8ac_peak_28006 | 12.80176 | LACTB2_ENSG00000147592;XKR9_ENSG00000221947                              |
| 8 | 71581617 | 71582144 | KD2-H4K8ac_peak_28007 | 13.39763 | LACTB2_ENSG00000147592;XKR9_ENSG00000221947                              |
| 8 | 71924254 | 71924482 | KD2-H4K8ac_peak_28008 | 4.37709  |                                                                          |
| 8 | 71964681 | 71965022 | KD2-H4K8ac_peak_28009 | 4.98072  |                                                                          |
| 8 | 72269527 | 72269820 | KD2-H4K8ac_peak_28010 | 9.02371  |                                                                          |
| 8 | 72520911 | 72521181 | KD2-H4K8ac_peak_28011 | 6.40683  |                                                                          |
| 8 | 73152879 | 73153147 | KD2-H4K8ac_peak_28012 | 4.59928  |                                                                          |

|   |          |          |                       |          |                                                     |
|---|----------|----------|-----------------------|----------|-----------------------------------------------------|
| 8 | 73163534 | 73164121 | KD2-H4K8ac_peak_28013 | 6.66692  | RP11-656G20.1_ENSG00000250979                       |
| 8 | 73921190 | 73921495 | KD2-H4K8ac_peak_28014 | 12.80176 | TERF1_ENSG00000147601                               |
| 8 | 74004948 | 74005713 | KD2-H4K8ac_peak_28015 | 7.36799  |                                                     |
| 8 | 74206153 | 74206581 | KD2-H4K8ac_peak_28016 | 18.80827 | RDH10_ENSG00000121039                               |
| 8 | 74226699 | 74226897 | KD2-H4K8ac_peak_28017 | 8.00457  |                                                     |
| 8 | 74268862 | 74269068 | KD2-H4K8ac_peak_28018 | 7.27716  | RP11-434I12.2_ENSG00000250295                       |
| 8 | 74658453 | 74659044 | KD2-H4K8ac_peak_28019 | 11.2938  | STAU2_ENSG00000040341                               |
| 8 | 74659292 | 74659753 | KD2-H4K8ac_peak_28020 | 22.07309 | STAU2_ENSG00000040341                               |
| 8 | 74660118 | 74660529 | KD2-H4K8ac_peak_28021 | 4.42765  | STAU2_ENSG00000040341                               |
| 8 | 74790552 | 74791026 | KD2-H4K8ac_peak_28022 | 11.80283 | RP11-463D19.2_ENSG00000258677;UBE2W_ENSG00000104343 |
| 8 | 74791309 | 74791552 | KD2-H4K8ac_peak_28023 | 4.56666  | RP11-463D19.2_ENSG00000258677;UBE2W_ENSG00000104343 |
| 8 | 74885629 | 74885877 | KD2-H4K8ac_peak_28024 | 5.57044  | TMEM70_ENSG00000175606                              |
| 8 | 74888530 | 74888833 | KD2-H4K8ac_peak_28025 | 7.51054  |                                                     |
| 8 | 75233905 | 75234135 | KD2-H4K8ac_peak_28026 | 6.55628  | JPH1_ENSG00000104369;GDAP1_ENSG00000104381          |
| 8 | 75262280 | 75263041 | KD2-H4K8ac_peak_28027 | 11.05407 | CTD-2320G14.2_ENSG00000253596                       |
| 8 | 75835261 | 75835480 | KD2-H4K8ac_peak_28028 | 7.12754  |                                                     |
| 8 | 75896206 | 75896595 | KD2-H4K8ac_peak_28029 | 14.98671 | CRISPLD1_ENSG00000121005                            |
| 8 | 76236506 | 76236919 | KD2-H4K8ac_peak_28030 | 11.75669 | CASC9_ENSG00000249395                               |
| 8 | 76319358 | 76319751 | KD2-H4K8ac_peak_28031 | 9.20193  | HNF4G_ENSG00000164749                               |
| 8 | 76320127 | 76320384 | KD2-H4K8ac_peak_28032 | 8.52559  | HNF4G_ENSG00000164749                               |
| 8 | 77590026 | 77590556 | KD2-H4K8ac_peak_28033 | 4.86324  |                                                     |
| 8 | 77593151 | 77593407 | KD2-H4K8ac_peak_28034 | 10.29344 | ZFHX4_ENSG00000091656                               |
| 8 | 77594226 | 77594800 | KD2-H4K8ac_peak_28035 | 10.86378 | ZFHX4_ENSG00000091656;ZFHX4-AS1_ENSG00000253661     |
| 8 | 77644820 | 77645056 | KD2-H4K8ac_peak_28036 | 7.12754  |                                                     |
| 8 | 77687903 | 77688311 | KD2-H4K8ac_peak_28037 | 4.01115  |                                                     |
| 8 | 77912656 | 77913141 | KD2-H4K8ac_peak_28038 | 4.84794  | PEX2_ENSG00000164751                                |
| 8 | 79144282 | 79144493 | KD2-H4K8ac_peak_28039 | 6.40683  |                                                     |
| 8 | 79428168 | 79428461 | KD2-H4K8ac_peak_28040 | 6.36375  | PKIA_ENSG00000171033                                |
| 8 | 79717004 | 79717728 | KD2-H4K8ac_peak_28041 | 5.54647  | IL7_ENSG00000104432                                 |
| 8 | 80200038 | 80200341 | KD2-H4K8ac_peak_28042 | 7.76335  |                                                     |
| 8 | 80200617 | 80200995 | KD2-H4K8ac_peak_28043 | 4.67342  |                                                     |
| 8 | 80211262 | 80211490 | KD2-H4K8ac_peak_28044 | 7.12754  |                                                     |
| 8 | 80215599 | 80216132 | KD2-H4K8ac_peak_28045 | 10.21502 |                                                     |
| 8 | 80524395 | 80525821 | KD2-H4K8ac_peak_28046 | 19.1048  |                                                     |
| 8 | 80680628 | 80681048 | KD2-H4K8ac_peak_28047 | 14.04094 | HEY1_ENSG00000164683;RP11-27N21.3_ENSG00000272138   |
| 8 | 80681653 | 80682520 | KD2-H4K8ac_peak_28048 | 3.97079  |                                                     |
| 8 | 80695408 | 80695668 | KD2-H4K8ac_peak_28049 | 7.13615  |                                                     |
| 8 | 80695897 | 80696370 | KD2-H4K8ac_peak_28050 | 12.84642 |                                                     |
| 8 | 80729018 | 80729211 | KD2-H4K8ac_peak_28051 | 8.21084  |                                                     |
| 8 | 80739324 | 80740074 | KD2-H4K8ac_peak_28052 | 8.10216  |                                                     |
| 8 | 81083533 | 81084073 | KD2-H4K8ac_peak_28053 | 6.66359  |                                                     |
| 8 | 81398519 | 81398858 | KD2-H4K8ac_peak_28054 | 11.90231 | Y_RNA_ENSG00000251867;ZBTB10_ENSG00000205189        |
| 8 | 81399148 | 81399409 | KD2-H4K8ac_peak_28055 | 9.71513  |                                                     |
| 8 | 81490243 | 81490758 | KD2-H4K8ac_peak_28056 | 14.66631 |                                                     |
| 8 | 81490965 | 81491436 | KD2-H4K8ac_peak_28057 | 7.76104  |                                                     |
| 8 | 81531141 | 81531409 | KD2-H4K8ac_peak_28058 | 6.83936  |                                                     |

|   |          |          |                       |          |                                                                                |
|---|----------|----------|-----------------------|----------|--------------------------------------------------------------------------------|
| 8 | 81531933 | 81532194 | KD2-H4K8ac_peak_28059 | 8.10216  |                                                                                |
| 8 | 81597531 | 81597801 | KD2-H4K8ac_peak_28060 | 4.01115  |                                                                                |
| 8 | 81599420 | 81599612 | KD2-H4K8ac_peak_28061 | 6.66692  |                                                                                |
| 8 | 81662782 | 81663157 | KD2-H4K8ac_peak_28062 | 5.53095  | RNU11-6P_ENSG00000212429                                                       |
| 8 | 81664859 | 81665461 | KD2-H4K8ac_peak_28063 | 9.89126  |                                                                                |
| 8 | 81666064 | 81666616 | KD2-H4K8ac_peak_28064 | 8.4939   |                                                                                |
| 8 | 81667368 | 81667596 | KD2-H4K8ac_peak_28065 | 7.47462  |                                                                                |
| 8 | 81692284 | 81693176 | KD2-H4K8ac_peak_28066 | 8.70735  |                                                                                |
| 8 | 81693655 | 81694057 | KD2-H4K8ac_peak_28067 | 8.17902  |                                                                                |
| 8 | 81694882 | 81695508 | KD2-H4K8ac_peak_28068 | 11.29366 |                                                                                |
| 8 | 81698202 | 81698425 | KD2-H4K8ac_peak_28069 | 4.86324  |                                                                                |
| 8 | 81785392 | 81786432 | KD2-H4K8ac_peak_28070 | 13.34404 | ZNF704_ENSG00000164684                                                         |
| 8 | 81834566 | 81834788 | KD2-H4K8ac_peak_28071 | 9.15069  |                                                                                |
| 8 | 81904447 | 81904703 | KD2-H4K8ac_peak_28072 | 9.27888  |                                                                                |
| 8 | 81938755 | 81939019 | KD2-H4K8ac_peak_28073 | 4.211    |                                                                                |
| 8 | 82192477 | 82193973 | KD2-H4K8ac_peak_28074 | 8.55271  | RP11-363E6.3_ENSG00000254027;FABP5_ENSG00000164687                             |
| 8 | 82250176 | 82250585 | KD2-H4K8ac_peak_28075 | 8.84031  |                                                                                |
| 8 | 82251165 | 82251544 | KD2-H4K8ac_peak_28076 | 5.22731  |                                                                                |
| 8 | 82598035 | 82598492 | KD2-H4K8ac_peak_28077 | 9.20193  | IMPA1_ENSG00000133731                                                          |
| 8 | 82633664 | 82634032 | KD2-H4K8ac_peak_28078 | 22.21127 |                                                                                |
| 8 | 82754026 | 82754395 | KD2-H4K8ac_peak_28079 | 12.3187  | SNX16_ENSG00000104497                                                          |
| 8 | 86018793 | 86019034 | KD2-H4K8ac_peak_28080 | 4.8402   | LRRCC1_ENSG00000133739                                                         |
| 8 | 86019448 | 86019775 | KD2-H4K8ac_peak_28081 | 7.1181   | LRRCC1_ENSG00000133739                                                         |
| 8 | 86088900 | 86090039 | KD2-H4K8ac_peak_28082 | 10.0692  | RP11-219B4.7_ENSG00000260493;E2F5_ENSG00000133740;RP11-219B4.3_ENSG00000254208 |
| 8 | 86132260 | 86132539 | KD2-H4K8ac_peak_28083 | 6.85193  | C8orf59_ENSG00000176731;CA13_ENSG00000185015                                   |
| 8 | 86132852 | 86133194 | KD2-H4K8ac_peak_28084 | 8.94469  | C8orf59_ENSG00000176731;CA13_ENSG00000185015                                   |
| 8 | 87353993 | 87354410 | KD2-H4K8ac_peak_28085 | 4.44748  | WWP1_ENSG00000123124                                                           |
| 8 | 87354972 | 87355516 | KD2-H4K8ac_peak_28086 | 7.33266  | CTD-2284J15.1_ENSG00000254231;WWP1_ENSG00000123124                             |
| 8 | 87520430 | 87520844 | KD2-H4K8ac_peak_28087 | 8.86099  |                                                                                |
| 8 | 87526158 | 87526470 | KD2-H4K8ac_peak_28088 | 6.40683  | RMDN1_ENSG00000176623                                                          |
| 8 | 89339568 | 89339826 | KD2-H4K8ac_peak_28089 | 8.17902  | MMP16_ENSG00000156103;RP11-586K2.1_ENSG00000253553                             |
| 8 | 89340149 | 89340363 | KD2-H4K8ac_peak_28090 | 4.06758  | MMP16_ENSG00000156103                                                          |
| 8 | 90769559 | 90770291 | KD2-H4K8ac_peak_28091 | 8.58069  | RP11-37B2.1_ENSG00000251136;RIPK2_ENSG00000104312                              |
| 8 | 90914143 | 90914582 | KD2-H4K8ac_peak_28092 | 3.97079  | OSGIN2_ENSG00000164823                                                         |
| 8 | 90914831 | 90915191 | KD2-H4K8ac_peak_28093 | 21.10246 | OSGIN2_ENSG00000164823                                                         |
| 8 | 90996589 | 90996878 | KD2-H4K8ac_peak_28094 | 17.8868  |                                                                                |
| 8 | 91013514 | 91014239 | KD2-H4K8ac_peak_28095 | 8.02571  | DECR1_ENSG00000104325                                                          |
| 8 | 91657619 | 91658646 | KD2-H4K8ac_peak_28096 | 13.12288 | RP11-68L18.1_ENSG00000246792                                                   |
| 8 | 91926128 | 91926327 | KD2-H4K8ac_peak_28097 | 6.86699  |                                                                                |
| 8 | 91996976 | 91997397 | KD2-H4K8ac_peak_28098 | 9.59147  | C8orf88_ENSG00000253250                                                        |
| 8 | 91997736 | 91998019 | KD2-H4K8ac_peak_28099 | 10.05606 | C8orf88_ENSG00000253250                                                        |
| 8 | 92053522 | 92053758 | KD2-H4K8ac_peak_28100 | 7.59643  | TMEM55A_ENSG00000155099                                                        |
| 8 | 92082693 | 92082939 | KD2-H4K8ac_peak_28101 | 5.57044  | GS1-25119.4_ENSG00000253738;OTUD6B_ENSG00000155100                             |
| 8 | 92769773 | 92769997 | KD2-H4K8ac_peak_28102 | 6.16888  |                                                                                |
| 8 | 92770645 | 92770901 | KD2-H4K8ac_peak_28103 | 12.42547 |                                                                                |
| 8 | 92897693 | 92898048 | KD2-H4K8ac_peak_28104 | 9.15329  |                                                                                |

|   |           |          |                       |          |                                                        |
|---|-----------|----------|-----------------------|----------|--------------------------------------------------------|
| 8 | 93029251  | 93029510 | KD2-H4K8ac_peak_28105 | 5.71749  |                                                        |
| 8 | 93064063  | 93064263 | KD2-H4K8ac_peak_28106 | 4.37708  |                                                        |
| 8 | 93083762  | 93084146 | KD2-H4K8ac_peak_28107 | 6.66692  |                                                        |
| 8 | 93115074  | 93115322 | KD2-H4K8ac_peak_28108 | 5.75757  | RUNX1T1_ENSG00000079102                                |
| 8 | 93978014  | 93978294 | KD2-H4K8ac_peak_28109 | 16.3889  |                                                        |
| 8 | 94305761  | 94305967 | KD2-H4K8ac_peak_28110 | 7.47462  |                                                        |
| 8 | 94638767  | 94638973 | KD2-H4K8ac_peak_28111 | 7.12754  |                                                        |
| 8 | 94712817  | 94713172 | KD2-H4K8ac_peak_28112 | 13.09607 | LINC00535_ENSG00000246662                              |
| 8 | 94928598  | 94928800 | KD2-H4K8ac_peak_28113 | 9.1707   | MIR378D2_ENSG00000264448                               |
| 8 | 94929221  | 94929883 | KD2-H4K8ac_peak_28114 | 10.86378 | MIR378D2_ENSG00000264448                               |
| 8 | 95237735  | 95237973 | KD2-H4K8ac_peak_28115 | 7.18916  |                                                        |
| 8 | 95274369  | 95275003 | KD2-H4K8ac_peak_28116 | 12.99417 | GEM_ENSG00000164949                                    |
| 8 | 95487047  | 95487254 | KD2-H4K8ac_peak_28117 | 5.59859  | RAD54B_ENSG00000197275                                 |
| 8 | 95487594  | 95488067 | KD2-H4K8ac_peak_28118 | 7.91974  | RAD54B_ENSG00000197275                                 |
| 8 | 95730769  | 95731055 | KD2-H4K8ac_peak_28119 | 7.27716  | DPY19L4_ENSG00000156162                                |
| 8 | 95731678  | 95731917 | KD2-H4K8ac_peak_28120 | 6.83936  | DPY19L4_ENSG00000156162                                |
| 8 | 95732128  | 95732473 | KD2-H4K8ac_peak_28121 | 14.66631 | DPY19L4_ENSG00000156162                                |
| 8 | 95835556  | 95835778 | KD2-H4K8ac_peak_28122 | 11.92978 |                                                        |
| 8 | 95956749  | 95956994 | KD2-H4K8ac_peak_28123 | 4.77079  |                                                        |
| 8 | 95960970  | 95961539 | KD2-H4K8ac_peak_28124 | 7.74292  | RP11-347C18.3_ENSG00000253878;TP53INP1_ENSG00000164938 |
| 8 | 95961893  | 95962401 | KD2-H4K8ac_peak_28125 | 11.00372 | RP11-347C18.3_ENSG00000253878;TP53INP1_ENSG00000164938 |
| 8 | 96036690  | 96037058 | KD2-H4K8ac_peak_28126 | 12.11734 |                                                        |
| 8 | 96146145  | 96146810 | KD2-H4K8ac_peak_28127 | 9.08816  | PLEKHF2_ENSG00000175895                                |
| 8 | 96280625  | 96280842 | KD2-H4K8ac_peak_28128 | 6.83936  | C8orf37_ENSG00000156172                                |
| 8 | 96281598  | 96281834 | KD2-H4K8ac_peak_28129 | 7.51054  | C8orf37_ENSG00000156172                                |
| 8 | 97273602  | 97274336 | KD2-H4K8ac_peak_28130 | 11.89502 | MTERFD1_ENSG00000156469;PTDSS1_ENSG00000156471         |
| 8 | 97506338  | 97506535 | KD2-H4K8ac_peak_28131 | 5.08628  | SDC2_ENSG00000169439                                   |
| 8 | 97507277  | 97507647 | KD2-H4K8ac_peak_28132 | 5.14125  |                                                        |
| 8 | 97778545  | 97778754 | KD2-H4K8ac_peak_28133 | 6.8836   |                                                        |
| 8 | 98244282  | 98244531 | KD2-H4K8ac_peak_28134 | 11.1952  |                                                        |
| 8 | 98306019  | 98306219 | KD2-H4K8ac_peak_28135 | 7.27716  |                                                        |
| 8 | 98656481  | 98657210 | KD2-H4K8ac_peak_28136 | 17.76996 | MTDH_ENSG00000147649                                   |
| 8 | 98788093  | 98788380 | KD2-H4K8ac_peak_28137 | 8.85813  | LAPTM4B_ENSG00000104341                                |
| 8 | 99021973  | 99022176 | KD2-H4K8ac_peak_28138 | 6.16747  |                                                        |
| 8 | 99022454  | 99023404 | KD2-H4K8ac_peak_28139 | 11.89502 |                                                        |
| 8 | 99024432  | 99024656 | KD2-H4K8ac_peak_28140 | 5.66317  |                                                        |
| 8 | 99057298  | 99057633 | KD2-H4K8ac_peak_28141 | 8.55271  |                                                        |
| 8 | 99057994  | 99058436 | KD2-H4K8ac_peak_28142 | 5.13615  | RPL30_ENSG00000156482                                  |
| 8 | 99128980  | 99129280 | KD2-H4K8ac_peak_28143 | 6.25869  | HRSP12_ENSG00000132541;POPI_ENSG00000104356            |
| 8 | 99305493  | 99306848 | KD2-H4K8ac_peak_28144 | 9.63487  | NIPAL2_ENSG00000104361                                 |
| 8 | 99837469  | 99837847 | KD2-H4K8ac_peak_28145 | 6.66692  |                                                        |
| 8 | 99838616  | 99838809 | KD2-H4K8ac_peak_28146 | 7.12754  |                                                        |
| 8 | 99951957  | 99953175 | KD2-H4K8ac_peak_28147 | 12.00597 |                                                        |
| 8 | 99954182  | 99954520 | KD2-H4K8ac_peak_28148 | 7.146    | STK3_ENSG00000104375                                   |
| 8 | 100025300 | 1E+08    | KD2-H4K8ac_peak_28149 | 9.20193  | VPS13B_ENSG00000132549;RP11-410L14.2_ENSG00000253948   |
| 8 | 100905548 | 1.01E+08 | KD2-H4K8ac_peak_28150 | 8.82366  | COX6C_ENSG00000164919                                  |



|   |           |          |                       |          |                                                  |
|---|-----------|----------|-----------------------|----------|--------------------------------------------------|
| 8 | 100906114 | 1.01E+08 | KD2-H4K8ac_peak_28151 | 8.1718   | COX6C_ENSG00000164919                            |
| 8 | 101157611 | 1.01E+08 | KD2-H4K8ac_peak_28152 | 5.88845  | FBXO43_ENSG00000156509                           |
| 8 | 101225410 | 1.01E+08 | KD2-H4K8ac_peak_28153 | 3.97079  |                                                  |
| 8 | 101428024 | 1.01E+08 | KD2-H4K8ac_peak_28154 | 6.2781   |                                                  |
| 8 | 101445707 | 1.01E+08 | KD2-H4K8ac_peak_28155 | 6.27931  |                                                  |
| 8 | 101502356 | 1.02E+08 | KD2-H4K8ac_peak_28156 | 6.50927  |                                                  |
| 8 | 101504786 | 1.02E+08 | KD2-H4K8ac_peak_28157 | 8.26945  | KB-1615E4.3_ENSG00000254364                      |
| 8 | 101506996 | 1.02E+08 | KD2-H4K8ac_peak_28158 | 5.9696   |                                                  |
| 8 | 101521314 | 1.02E+08 | KD2-H4K8ac_peak_28159 | 13.36684 |                                                  |
| 8 | 101522530 | 1.02E+08 | KD2-H4K8ac_peak_28160 | 10.29842 |                                                  |
| 8 | 101571618 | 1.02E+08 | KD2-H4K8ac_peak_28161 | 14.48084 | ANKRD46_ENSG00000186106                          |
| 8 | 101859554 | 1.02E+08 | KD2-H4K8ac_peak_28162 | 10.0692  |                                                  |
| 8 | 101962991 | 1.02E+08 | KD2-H4K8ac_peak_28163 | 10.46874 |                                                  |
| 8 | 101964518 | 1.02E+08 | KD2-H4K8ac_peak_28164 | 16.33377 | YWHAZ_ENSG00000164924                            |
| 8 | 102038591 | 1.02E+08 | KD2-H4K8ac_peak_28165 | 5.75452  |                                                  |
| 8 | 102039370 | 1.02E+08 | KD2-H4K8ac_peak_28166 | 5.15777  |                                                  |
| 8 | 102064259 | 1.02E+08 | KD2-H4K8ac_peak_28167 | 10.0746  | RP11-302J23.1_ENSG00000248599                    |
| 8 | 102082308 | 1.02E+08 | KD2-H4K8ac_peak_28168 | 6.66692  |                                                  |
| 8 | 102084160 | 1.02E+08 | KD2-H4K8ac_peak_28169 | 4.42765  |                                                  |
| 8 | 102092832 | 1.02E+08 | KD2-H4K8ac_peak_28170 | 8.86099  |                                                  |
| 8 | 102121417 | 1.02E+08 | KD2-H4K8ac_peak_28171 | 12.79505 |                                                  |
| 8 | 102122035 | 1.02E+08 | KD2-H4K8ac_peak_28172 | 8.66888  |                                                  |
| 8 | 102138414 | 1.02E+08 | KD2-H4K8ac_peak_28173 | 10.72313 | KB-1460A1.1_ENSG00000253395                      |
| 8 | 102139345 | 1.02E+08 | KD2-H4K8ac_peak_28174 | 7.67504  | KB-1460A1.1_ENSG00000253395                      |
| 8 | 102149334 | 1.02E+08 | KD2-H4K8ac_peak_28175 | 6.64891  | RN7SKP249_ENSG00000202360                        |
| 8 | 102217087 | 1.02E+08 | KD2-H4K8ac_peak_28176 | 10.65724 | ZNF706_ENSG00000120963                           |
| 8 | 102218214 | 1.02E+08 | KD2-H4K8ac_peak_28177 | 9.1707   | ZNF706_ENSG00000120963                           |
| 8 | 102598141 | 1.03E+08 | KD2-H4K8ac_peak_28178 | 7.45501  |                                                  |
| 8 | 102599402 | 1.03E+08 | KD2-H4K8ac_peak_28179 | 5.64449  |                                                  |
| 8 | 102655739 | 1.03E+08 | KD2-H4K8ac_peak_28180 | 5.26591  |                                                  |
| 8 | 102660709 | 1.03E+08 | KD2-H4K8ac_peak_28181 | 8.23274  |                                                  |
| 8 | 102713017 | 1.03E+08 | KD2-H4K8ac_peak_28182 | 7.69287  |                                                  |
| 8 | 102717748 | 1.03E+08 | KD2-H4K8ac_peak_28183 | 6.40683  |                                                  |
| 8 | 102733779 | 1.03E+08 | KD2-H4K8ac_peak_28184 | 8.93112  |                                                  |
| 8 | 102771907 | 1.03E+08 | KD2-H4K8ac_peak_28185 | 7.44366  |                                                  |
| 8 | 103135734 | 1.03E+08 | KD2-H4K8ac_peak_28186 | 13.88933 | NCALD_ENSG00000104490;MIR5680_ENSG00000266756    |
| 8 | 103250690 | 1.03E+08 | KD2-H4K8ac_peak_28187 | 9.36516  | RRM2B_ENSG00000048392;KB-431C1.4_ENSG00000246263 |
| 8 | 103424067 | 1.03E+08 | KD2-H4K8ac_peak_28188 | 26.96144 | UBR5_ENSG00000104517                             |
| 8 | 103541293 | 1.04E+08 | KD2-H4K8ac_peak_28189 | 6.99815  | KB-1980E6.3_ENSG00000253633                      |
| 8 | 103549914 | 1.04E+08 | KD2-H4K8ac_peak_28190 | 5.88845  |                                                  |
| 8 | 103613512 | 1.04E+08 | KD2-H4K8ac_peak_28191 | 6.76298  |                                                  |
| 8 | 103639923 | 1.04E+08 | KD2-H4K8ac_peak_28192 | 5.45396  |                                                  |
| 8 | 103666579 | 1.04E+08 | KD2-H4K8ac_peak_28193 | 11.03331 |                                                  |
| 8 | 103668533 | 1.04E+08 | KD2-H4K8ac_peak_28194 | 14.66631 | KLF10_ENSG00000155090                            |
| 8 | 103669614 | 1.04E+08 | KD2-H4K8ac_peak_28195 | 11.89502 |                                                  |
| 8 | 103740194 | 1.04E+08 | KD2-H4K8ac_peak_28196 | 6.65673  |                                                  |

|   |           |          |                       |          |                                                                         |
|---|-----------|----------|-----------------------|----------|-------------------------------------------------------------------------|
| 8 | 103741372 | 1.04E+08 | KD2-H4K8ac_peak_28197 | 8.30974  |                                                                         |
| 8 | 103803166 | 1.04E+08 | KD2-H4K8ac_peak_28198 | 8.66368  |                                                                         |
| 8 | 103807426 | 1.04E+08 | KD2-H4K8ac_peak_28199 | 11.03331 |                                                                         |
| 8 | 103818310 | 1.04E+08 | KD2-H4K8ac_peak_28200 | 9.36516  | KB-1732A1.1_ENSG00000253669                                             |
| 8 | 103818902 | 1.04E+08 | KD2-H4K8ac_peak_28201 | 24.30324 |                                                                         |
| 8 | 103822562 | 1.04E+08 | KD2-H4K8ac_peak_28202 | 11.92978 |                                                                         |
| 8 | 103856375 | 1.04E+08 | KD2-H4K8ac_peak_28203 | 7.76329  |                                                                         |
| 8 | 103876024 | 1.04E+08 | KD2-H4K8ac_peak_28204 | 8.59579  | KB-1507C5.2_ENSG00000253320                                             |
| 8 | 103876597 | 1.04E+08 | KD2-H4K8ac_peak_28205 | 12.00597 | KB-1507C5.2_ENSG00000253320                                             |
| 8 | 104032821 | 1.04E+08 | KD2-H4K8ac_peak_28206 | 5.54647  | KB-1639H6.2_ENSG00000254236;ATP6V1C1_ENSG00000155097                    |
| 8 | 104152577 | 1.04E+08 | KD2-H4K8ac_peak_28207 | 5.75757  | C8orf56_ENSG00000236939;BAALC_ENSG00000164929                           |
| 8 | 104310700 | 1.04E+08 | KD2-H4K8ac_peak_28208 | 16.54484 | RP11-318M2.2_ENSG00000247081;FZD6_ENSG00000164930                       |
| 8 | 104383744 | 1.04E+08 | KD2-H4K8ac_peak_28209 | 9.1707   | CTHRC1_ENSG00000164932                                                  |
| 8 | 104426987 | 1.04E+08 | KD2-H4K8ac_peak_28210 | 5.9696   | SLC25A32_ENSG00000164933;DCAF13_ENSG00000164934                         |
| 8 | 104512473 | 1.05E+08 | KD2-H4K8ac_peak_28211 | 9.59147  | RIMS2_ENSG00000176406                                                   |
| 8 | 104512913 | 1.05E+08 | KD2-H4K8ac_peak_28212 | 17.70837 | RP11-1C8.4_ENSG00000253477;RIMS2_ENSG00000176406                        |
| 8 | 105235382 | 1.05E+08 | KD2-H4K8ac_peak_28213 | 6.16888  |                                                                         |
| 8 | 105333577 | 1.05E+08 | KD2-H4K8ac_peak_28214 | 4.44748  |                                                                         |
| 8 | 105337950 | 1.05E+08 | KD2-H4K8ac_peak_28215 | 4.44748  |                                                                         |
| 8 | 105423827 | 1.05E+08 | KD2-H4K8ac_peak_28216 | 14.15075 |                                                                         |
| 8 | 105428701 | 1.05E+08 | KD2-H4K8ac_peak_28217 | 6.66692  |                                                                         |
| 8 | 105430742 | 1.05E+08 | KD2-H4K8ac_peak_28218 | 10.34425 |                                                                         |
| 8 | 105600348 | 1.06E+08 | KD2-H4K8ac_peak_28219 | 6.99815  | LRP12_ENSG00000147650                                                   |
| 8 | 106330661 | 1.06E+08 | KD2-H4K8ac_peak_28220 | 9.15329  | ZFPM2_ENSG00000169946                                                   |
| 8 | 110345809 | 1.1E+08  | KD2-H4K8ac_peak_28221 | 14.29602 | NUDCD1_ENSG00000120526;ENY2_ENSG00000120533                             |
| 8 | 110551425 | 1.11E+08 | KD2-H4K8ac_peak_28222 | 8.1233   | EBAG9_ENSG00000147654                                                   |
| 8 | 110626968 | 1.11E+08 | KD2-H4K8ac_peak_28223 | 5.10276  |                                                                         |
| 8 | 110656770 | 1.11E+08 | KD2-H4K8ac_peak_28224 | 9.07715  | RP11-422N16.3_ENSG00000248050                                           |
| 8 | 110704082 | 1.11E+08 | KD2-H4K8ac_peak_28225 | 7.12754  | SYBU_ENSG00000147642                                                    |
| 8 | 116361754 | 1.16E+08 | KD2-H4K8ac_peak_28226 | 7.12754  |                                                                         |
| 8 | 116681607 | 1.17E+08 | KD2-H4K8ac_peak_28227 | 5.57044  |                                                                         |
| 8 | 117559416 | 1.18E+08 | KD2-H4K8ac_peak_28228 | 10.68173 |                                                                         |
| 8 | 117677809 | 1.18E+08 | KD2-H4K8ac_peak_28229 | 6.07178  |                                                                         |
| 8 | 117767507 | 1.18E+08 | KD2-H4K8ac_peak_28230 | 9.16531  |                                                                         |
| 8 | 117777866 | 1.18E+08 | KD2-H4K8ac_peak_28231 | 7.27716  | EIF3H_ENSG00000147677;UTP23_ENSG00000147679                             |
| 8 | 117778786 | 1.18E+08 | KD2-H4K8ac_peak_28232 | 19.72117 | EIF3H_ENSG00000147677;UTP23_ENSG00000147679                             |
| 8 | 117886356 | 1.18E+08 | KD2-H4K8ac_peak_28233 | 10.29344 | RAD21_ENSG00000164754;RAD21-AS1_ENSG00000253327;MIR3610_ENSG00000264875 |
| 8 | 118948976 | 1.19E+08 | KD2-H4K8ac_peak_28234 | 4.04247  |                                                                         |
| 8 | 119086704 | 1.19E+08 | KD2-H4K8ac_peak_28235 | 7.12754  |                                                                         |
| 8 | 119124322 | 1.19E+08 | KD2-H4K8ac_peak_28236 | 10.46264 | EXT1_ENSG00000182197                                                    |
| 8 | 119634555 | 1.2E+08  | KD2-H4K8ac_peak_28237 | 7.47462  | SAMD12_ENSG00000177570                                                  |
| 8 | 120844785 | 1.21E+08 | KD2-H4K8ac_peak_28238 | 19.6416  | TAF2_ENSG00000064313                                                    |
| 8 | 120845357 | 1.21E+08 | KD2-H4K8ac_peak_28239 | 8.10216  | TAF2_ENSG00000064313                                                    |
| 8 | 120867776 | 1.21E+08 | KD2-H4K8ac_peak_28240 | 12.82393 | DSCC1_ENSG00000136982                                                   |
| 8 | 120937779 | 1.21E+08 | KD2-H4K8ac_peak_28241 | 7.12754  |                                                                         |
| 8 | 121457159 | 1.21E+08 | KD2-H4K8ac_peak_28242 | 6.8836   | MRPL13_ENSG00000172172;MTBP_ENSG00000172167                             |

|   |           |          |                       |          |                                                   |
|---|-----------|----------|-----------------------|----------|---------------------------------------------------|
| 8 | 121823600 | 1.22E+08 | KD2-H4K8ac_peak_28243 | 9.1707   | RP11-713M15.2_ENSG00000272502                     |
| 8 | 123693007 | 1.24E+08 | KD2-H4K8ac_peak_28244 | 10.19949 |                                                   |
| 8 | 123693748 | 1.24E+08 | KD2-H4K8ac_peak_28245 | 3.97079  |                                                   |
| 8 | 123794492 | 1.24E+08 | KD2-H4K8ac_peak_28246 | 7.07117  | ZHX2_ENSG00000178764                              |
| 8 | 123807539 | 1.24E+08 | KD2-H4K8ac_peak_28247 | 6.56926  |                                                   |
| 8 | 124055341 | 1.24E+08 | KD2-H4K8ac_peak_28248 | 9.32235  | DERL1_ENSG00000136986                             |
| 8 | 124085002 | 1.24E+08 | KD2-H4K8ac_peak_28249 | 15.58442 |                                                   |
| 8 | 124178702 | 1.24E+08 | KD2-H4K8ac_peak_28250 | 4.98072  |                                                   |
| 8 | 124245252 | 1.24E+08 | KD2-H4K8ac_peak_28251 | 7.47462  |                                                   |
| 8 | 124285994 | 1.24E+08 | KD2-H4K8ac_peak_28252 | 15.039   |                                                   |
| 8 | 124408262 | 1.24E+08 | KD2-H4K8ac_peak_28253 | 10.0692  |                                                   |
| 8 | 124428339 | 1.24E+08 | KD2-H4K8ac_peak_28254 | 7.27716  | ATAD2_ENSG00000156802;WDYHV1_ENSG00000156795      |
| 8 | 124429068 | 1.24E+08 | KD2-H4K8ac_peak_28255 | 5.13615  | ATAD2_ENSG00000156802;WDYHV1_ENSG00000156795      |
| 8 | 124552503 | 1.25E+08 | KD2-H4K8ac_peak_28256 | 3.97079  | FBXO32_ENSG00000156804                            |
| 8 | 124553752 | 1.25E+08 | KD2-H4K8ac_peak_28257 | 5.30799  | FBXO32_ENSG00000156804                            |
| 8 | 124605704 | 1.25E+08 | KD2-H4K8ac_peak_28258 | 6.8836   |                                                   |
| 8 | 124780777 | 1.25E+08 | KD2-H4K8ac_peak_28259 | 8.43115  | FAM91A1_ENSG00000176853                           |
| 8 | 125384075 | 1.25E+08 | KD2-H4K8ac_peak_28260 | 11.22681 | TMEM65_ENSG00000164983                            |
| 8 | 125385191 | 1.25E+08 | KD2-H4K8ac_peak_28261 | 6.45083  | TMEM65_ENSG00000164983                            |
| 8 | 125463152 | 1.25E+08 | KD2-H4K8ac_peak_28262 | 12.03366 | TRMT12_ENSG00000183665                            |
| 8 | 125486519 | 1.25E+08 | KD2-H4K8ac_peak_28263 | 7.13615  | RNF139-AS1_ENSG00000245149;RNF139_ENSG00000170881 |
| 8 | 125487002 | 1.25E+08 | KD2-H4K8ac_peak_28264 | 12.00273 | RNF139-AS1_ENSG00000245149;RNF139_ENSG00000170881 |
| 8 | 125550915 | 1.26E+08 | KD2-H4K8ac_peak_28265 | 17.86168 | TATDN1_ENSG00000147687;NDUF99_ENSG00000147684     |
| 8 | 125699814 | 1.26E+08 | KD2-H4K8ac_peak_28266 | 6.31143  |                                                   |
| 8 | 125739526 | 1.26E+08 | KD2-H4K8ac_peak_28267 | 7.27716  | MTSS1_ENSG00000170873                             |
| 8 | 125984901 | 1.26E+08 | KD2-H4K8ac_peak_28268 | 9.1707   | ZNF572_ENSG00000180938                            |
| 8 | 125985652 | 1.26E+08 | KD2-H4K8ac_peak_28269 | 7.0754   | ZNF572_ENSG00000180938                            |
| 8 | 126009980 | 1.26E+08 | KD2-H4K8ac_peak_28270 | 15.22643 | RP11-6D1.3_ENSG00000253513;SQLE_ENSG00000104549   |
| 8 | 126103708 | 1.26E+08 | KD2-H4K8ac_peak_28271 | 4.91674  | KIAA0196_ENSG00000164961;NSMCE2_ENSG00000156831   |
| 8 | 126104178 | 1.26E+08 | KD2-H4K8ac_peak_28272 | 7.40314  | KIAA0196_ENSG00000164961;NSMCE2_ENSG00000156831   |
| 8 | 126343406 | 1.26E+08 | KD2-H4K8ac_peak_28273 | 5.43522  |                                                   |
| 8 | 126345987 | 1.26E+08 | KD2-H4K8ac_peak_28274 | 6.72021  |                                                   |
| 8 | 126346680 | 1.26E+08 | KD2-H4K8ac_peak_28275 | 6.8836   |                                                   |
| 8 | 126347161 | 1.26E+08 | KD2-H4K8ac_peak_28276 | 5.9696   |                                                   |
| 8 | 126400657 | 1.26E+08 | KD2-H4K8ac_peak_28277 | 6.40683  |                                                   |
| 8 | 126441229 | 1.26E+08 | KD2-H4K8ac_peak_28278 | 14.84212 | TRIB1_ENSG00000173334                             |
| 8 | 126441789 | 1.26E+08 | KD2-H4K8ac_peak_28279 | 8.4716   | TRIB1_ENSG00000173334                             |
| 8 | 128806147 | 1.29E+08 | KD2-H4K8ac_peak_28280 | 7.36799  | PVT1_ENSG00000249859                              |
| 8 | 128812610 | 1.29E+08 | KD2-H4K8ac_peak_28281 | 6.8836   |                                                   |
| 8 | 128813317 | 1.29E+08 | KD2-H4K8ac_peak_28282 | 6.8836   |                                                   |
| 8 | 128815162 | 1.29E+08 | KD2-H4K8ac_peak_28283 | 7.79898  |                                                   |
| 8 | 130951577 | 1.31E+08 | KD2-H4K8ac_peak_28284 | 16.8435  | RP11-473O4.3_ENSG00000253720                      |
| 8 | 130952392 | 1.31E+08 | KD2-H4K8ac_peak_28285 | 8.17902  | RP11-473O4.3_ENSG00000253720                      |
| 8 | 130987127 | 1.31E+08 | KD2-H4K8ac_peak_28286 | 5.14125  |                                                   |
| 8 | 131027842 | 1.31E+08 | KD2-H4K8ac_peak_28287 | 13.56049 | FAM49B_ENSG00000153310                            |
| 8 | 131257043 | 1.31E+08 | KD2-H4K8ac_peak_28288 | 4.75764  |                                                   |

|   |           |          |                       |          |                                                      |
|---|-----------|----------|-----------------------|----------|------------------------------------------------------|
| 8 | 131309988 | 1.31E+08 | KD2-H4K8ac_peak_28289 | 4.86324  |                                                      |
| 8 | 131314192 | 1.31E+08 | KD2-H4K8ac_peak_28290 | 5.02756  |                                                      |
| 8 | 131321726 | 1.31E+08 | KD2-H4K8ac_peak_28291 | 5.57044  |                                                      |
| 8 | 131326725 | 1.31E+08 | KD2-H4K8ac_peak_28292 | 10.0692  |                                                      |
| 8 | 131455203 | 1.31E+08 | KD2-H4K8ac_peak_28293 | 11.82518 | ASAP1_ENSG00000153317                                |
| 8 | 131477667 | 1.31E+08 | KD2-H4K8ac_peak_28294 | 3.74127  |                                                      |
| 8 | 131506423 | 1.32E+08 | KD2-H4K8ac_peak_28295 | 9.11031  |                                                      |
| 8 | 131526490 | 1.32E+08 | KD2-H4K8ac_peak_28296 | 6.66692  |                                                      |
| 8 | 131530910 | 1.32E+08 | KD2-H4K8ac_peak_28297 | 5.54647  |                                                      |
| 8 | 131554098 | 1.32E+08 | KD2-H4K8ac_peak_28298 | 5.96828  |                                                      |
| 8 | 131651241 | 1.32E+08 | KD2-H4K8ac_peak_28299 | 7.67504  |                                                      |
| 8 | 131652378 | 1.32E+08 | KD2-H4K8ac_peak_28300 | 6.33462  |                                                      |
| 8 | 131653470 | 1.32E+08 | KD2-H4K8ac_peak_28301 | 10.87093 |                                                      |
| 8 | 132900460 | 1.33E+08 | KD2-H4K8ac_peak_28302 | 4.211    |                                                      |
| 8 | 132901919 | 1.33E+08 | KD2-H4K8ac_peak_28303 | 6.37652  |                                                      |
| 8 | 132915675 | 1.33E+08 | KD2-H4K8ac_peak_28304 | 6.69204  | EFR3A_ENSG00000132294                                |
| 8 | 132916411 | 1.33E+08 | KD2-H4K8ac_peak_28305 | 6.76298  | EFR3A_ENSG00000132294                                |
| 8 | 133687254 | 1.34E+08 | KD2-H4K8ac_peak_28306 | 3.87368  | LRRC6_ENSG00000129295                                |
| 8 | 133687993 | 1.34E+08 | KD2-H4K8ac_peak_28307 | 3.83717  | LRRC6_ENSG00000129295                                |
| 8 | 134109006 | 1.34E+08 | KD2-H4K8ac_peak_28308 | 4.57371  |                                                      |
| 8 | 134309776 | 1.34E+08 | KD2-H4K8ac_peak_28309 | 10.19949 |                                                      |
| 8 | 134584738 | 1.35E+08 | KD2-H4K8ac_peak_28310 | 5.82799  | ST3GAL1_ENSG00000008513;RP11-629O1.2_ENSG00000261220 |
| 8 | 135469239 | 1.35E+08 | KD2-H4K8ac_peak_28311 | 6.56926  |                                                      |
| 8 | 135470479 | 1.35E+08 | KD2-H4K8ac_peak_28312 | 6.25869  |                                                      |
| 8 | 135673415 | 1.36E+08 | KD2-H4K8ac_peak_28313 | 6.00226  |                                                      |
| 8 | 135724559 | 1.36E+08 | KD2-H4K8ac_peak_28314 | 10.77651 | ZFAT_ENSG00000066827                                 |
| 8 | 135725419 | 1.36E+08 | KD2-H4K8ac_peak_28315 | 19.3524  | ZFAT_ENSG00000066827                                 |
| 8 | 135843859 | 1.36E+08 | KD2-H4K8ac_peak_28316 | 10.08707 | AC083843.2_ENSG00000254028                           |
| 8 | 136469117 | 1.36E+08 | KD2-H4K8ac_peak_28317 | 11.24702 | RP11-343P9.1_ENSG00000254372;KHDRBS3_ENSG00000131773 |
| 8 | 136736892 | 1.37E+08 | KD2-H4K8ac_peak_28318 | 4.42765  |                                                      |
| 8 | 139684798 | 1.4E+08  | KD2-H4K8ac_peak_28319 | 6.90458  |                                                      |
| 8 | 139948207 | 1.4E+08  | KD2-H4K8ac_peak_28320 | 7.27716  |                                                      |
| 8 | 140438363 | 1.4E+08  | KD2-H4K8ac_peak_28321 | 7.59643  |                                                      |
| 8 | 140439402 | 1.4E+08  | KD2-H4K8ac_peak_28322 | 6.54442  |                                                      |
| 8 | 140440124 | 1.4E+08  | KD2-H4K8ac_peak_28323 | 5.57044  |                                                      |
| 8 | 140440778 | 1.4E+08  | KD2-H4K8ac_peak_28324 | 10.2048  |                                                      |
| 8 | 140441538 | 1.4E+08  | KD2-H4K8ac_peak_28325 | 5.30799  |                                                      |
| 8 | 140448000 | 1.4E+08  | KD2-H4K8ac_peak_28326 | 7.12754  |                                                      |
| 8 | 140448701 | 1.4E+08  | KD2-H4K8ac_peak_28327 | 6.16888  |                                                      |
| 8 | 140802627 | 1.41E+08 | KD2-H4K8ac_peak_28328 | 7.36799  |                                                      |
| 8 | 140821678 | 1.41E+08 | KD2-H4K8ac_peak_28329 | 7.67504  |                                                      |
| 8 | 140875478 | 1.41E+08 | KD2-H4K8ac_peak_28330 | 8.85813  |                                                      |
| 8 | 141467253 | 1.41E+08 | KD2-H4K8ac_peak_28331 | 14.48084 | TRAPPC9_ENSG00000167632                              |
| 8 | 141468319 | 1.41E+08 | KD2-H4K8ac_peak_28332 | 8.86099  | TRAPPC9_ENSG00000167632                              |
| 8 | 141474607 | 1.41E+08 | KD2-H4K8ac_peak_28333 | 20.08519 |                                                      |
| 8 | 141475110 | 1.41E+08 | KD2-H4K8ac_peak_28334 | 9.02371  |                                                      |

|   |           |          |                       |          |                                                     |
|---|-----------|----------|-----------------------|----------|-----------------------------------------------------|
| 8 | 141479699 | 1.41E+08 | KD2-H4K8ac_peak_28335 | 11.30637 |                                                     |
| 8 | 141489235 | 1.41E+08 | KD2-H4K8ac_peak_28336 | 11.05407 |                                                     |
| 8 | 141490107 | 1.41E+08 | KD2-H4K8ac_peak_28337 | 7.76104  |                                                     |
| 8 | 141501915 | 1.42E+08 | KD2-H4K8ac_peak_28338 | 5.80374  |                                                     |
| 8 | 141520919 | 1.42E+08 | KD2-H4K8ac_peak_28339 | 13.70605 | CHRAC1_ENSG00000104472                              |
| 8 | 141521476 | 1.42E+08 | KD2-H4K8ac_peak_28340 | 21.01976 | CHRAC1_ENSG00000104472                              |
| 8 | 141522230 | 1.42E+08 | KD2-H4K8ac_peak_28341 | 17.55491 | CHRAC1_ENSG00000104472                              |
| 8 | 141608566 | 1.42E+08 | KD2-H4K8ac_peak_28342 | 6.66692  |                                                     |
| 8 | 141644357 | 1.42E+08 | KD2-H4K8ac_peak_28343 | 9.1707   |                                                     |
| 8 | 141644884 | 1.42E+08 | KD2-H4K8ac_peak_28344 | 9.242    | AGO2_ENSG00000123908                                |
| 8 | 141645486 | 1.42E+08 | KD2-H4K8ac_peak_28345 | 12.46264 | AGO2_ENSG00000123908                                |
| 8 | 141645937 | 1.42E+08 | KD2-H4K8ac_peak_28346 | 11.89502 | AGO2_ENSG00000123908                                |
| 8 | 141801288 | 1.42E+08 | KD2-H4K8ac_peak_28347 | 3.75035  |                                                     |
| 8 | 142010488 | 1.42E+08 | KD2-H4K8ac_peak_28348 | 4.67737  |                                                     |
| 8 | 142010969 | 1.42E+08 | KD2-H4K8ac_peak_28349 | 7.76329  |                                                     |
| 8 | 142011566 | 1.42E+08 | KD2-H4K8ac_peak_28350 | 8.85813  | PTK2_ENSG00000169398                                |
| 8 | 142013307 | 1.42E+08 | KD2-H4K8ac_peak_28351 | 5.32137  | PTK2_ENSG00000169398                                |
| 8 | 142015166 | 1.42E+08 | KD2-H4K8ac_peak_28352 | 5.57044  |                                                     |
| 8 | 142032463 | 1.42E+08 | KD2-H4K8ac_peak_28353 | 13.39748 |                                                     |
| 8 | 142082921 | 1.42E+08 | KD2-H4K8ac_peak_28354 | 4.42643  |                                                     |
| 8 | 142083694 | 1.42E+08 | KD2-H4K8ac_peak_28355 | 7.01494  |                                                     |
| 8 | 142085036 | 1.42E+08 | KD2-H4K8ac_peak_28356 | 10.77651 |                                                     |
| 8 | 142105677 | 1.42E+08 | KD2-H4K8ac_peak_28357 | 5.57044  |                                                     |
| 8 | 142126870 | 1.42E+08 | KD2-H4K8ac_peak_28358 | 6.40297  | DENND3_ENSG00000105339                              |
| 8 | 142137767 | 1.42E+08 | KD2-H4K8ac_peak_28359 | 10.7186  |                                                     |
| 8 | 142174373 | 1.42E+08 | KD2-H4K8ac_peak_28360 | 4.54006  |                                                     |
| 8 | 142215717 | 1.42E+08 | KD2-H4K8ac_peak_28361 | 10.77651 |                                                     |
| 8 | 142289026 | 1.42E+08 | KD2-H4K8ac_peak_28362 | 4.8485   | RP11-10J21.5_ENSG00000254197                        |
| 8 | 142318797 | 1.42E+08 | KD2-H4K8ac_peak_28363 | 6.65673  | SLC45A4_ENSG0000022567                              |
| 8 | 142361902 | 1.42E+08 | KD2-H4K8ac_peak_28364 | 10.05606 |                                                     |
| 8 | 142369706 | 1.42E+08 | KD2-H4K8ac_peak_28365 | 7.67504  |                                                     |
| 8 | 142370914 | 1.42E+08 | KD2-H4K8ac_peak_28366 | 7.01494  |                                                     |
| 8 | 142375761 | 1.42E+08 | KD2-H4K8ac_peak_28367 | 4.211    |                                                     |
| 8 | 142382059 | 1.42E+08 | KD2-H4K8ac_peak_28368 | 6.52841  |                                                     |
| 8 | 142386216 | 1.42E+08 | KD2-H4K8ac_peak_28369 | 11.89502 |                                                     |
| 8 | 142388912 | 1.42E+08 | KD2-H4K8ac_peak_28370 | 8.7325   |                                                     |
| 8 | 142401349 | 1.42E+08 | KD2-H4K8ac_peak_28371 | 8.85813  | CTD-3064M3.4_ENSG00000244998;PTP4A3_ENSG00000184489 |
| 8 | 142402217 | 1.42E+08 | KD2-H4K8ac_peak_28372 | 31.64397 | CTD-3064M3.4_ENSG00000244998;PTP4A3_ENSG00000184489 |
| 8 | 142409028 | 1.42E+08 | KD2-H4K8ac_peak_28373 | 4.91674  |                                                     |
| 8 | 142410184 | 1.42E+08 | KD2-H4K8ac_peak_28374 | 8.10216  |                                                     |
| 8 | 142410761 | 1.42E+08 | KD2-H4K8ac_peak_28375 | 12.08081 |                                                     |
| 8 | 142419232 | 1.42E+08 | KD2-H4K8ac_peak_28376 | 6.8713   |                                                     |
| 8 | 142424058 | 1.42E+08 | KD2-H4K8ac_peak_28377 | 4.82973  |                                                     |
| 8 | 142425225 | 1.42E+08 | KD2-H4K8ac_peak_28378 | 6.25869  |                                                     |
| 8 | 142639575 | 1.43E+08 | KD2-H4K8ac_peak_28379 | 7.45501  |                                                     |
| 8 | 142842913 | 1.43E+08 | KD2-H4K8ac_peak_28380 | 14.56955 |                                                     |

|   |           |          |                       |          |                                                                                   |
|---|-----------|----------|-----------------------|----------|-----------------------------------------------------------------------------------|
| 8 | 142843613 | 1.43E+08 | KD2-H4K8ac_peak_28381 | 4.54006  |                                                                                   |
| 8 | 142859286 | 1.43E+08 | KD2-H4K8ac_peak_28382 | 6.09229  |                                                                                   |
| 8 | 142869021 | 1.43E+08 | KD2-H4K8ac_peak_28383 | 7.62364  |                                                                                   |
| 8 | 142877072 | 1.43E+08 | KD2-H4K8ac_peak_28384 | 6.40297  |                                                                                   |
| 8 | 142878569 | 1.43E+08 | KD2-H4K8ac_peak_28385 | 6.97919  |                                                                                   |
| 8 | 143001286 | 1.43E+08 | KD2-H4K8ac_peak_28386 | 3.97079  |                                                                                   |
| 8 | 143002826 | 1.43E+08 | KD2-H4K8ac_peak_28387 | 4.37815  |                                                                                   |
| 8 | 143052794 | 1.43E+08 | KD2-H4K8ac_peak_28388 | 10.58496 |                                                                                   |
| 8 | 143279783 | 1.43E+08 | KD2-H4K8ac_peak_28389 | 4.77079  | LINC00051_ENSG00000254008                                                         |
| 8 | 143330584 | 1.43E+08 | KD2-H4K8ac_peak_28390 | 5.13615  |                                                                                   |
| 8 | 143483887 | 1.43E+08 | KD2-H4K8ac_peak_28391 | 12.88702 | TSNARE1_ENSG00000171045;RP13-467H17.1_ENSG00000261693                             |
| 8 | 143534416 | 1.44E+08 | KD2-H4K8ac_peak_28392 | 10.41994 |                                                                                   |
| 8 | 143556496 | 1.44E+08 | KD2-H4K8ac_peak_28393 | 14.8083  |                                                                                   |
| 8 | 143557579 | 1.44E+08 | KD2-H4K8ac_peak_28394 | 10.96455 |                                                                                   |
| 8 | 143611783 | 1.44E+08 | KD2-H4K8ac_peak_28395 | 6.9556   |                                                                                   |
| 8 | 143612377 | 1.44E+08 | KD2-H4K8ac_peak_28396 | 10.96455 |                                                                                   |
| 8 | 143613541 | 1.44E+08 | KD2-H4K8ac_peak_28397 | 9.34989  |                                                                                   |
| 8 | 143625474 | 1.44E+08 | KD2-H4K8ac_peak_28398 | 4.20044  |                                                                                   |
| 8 | 143683432 | 1.44E+08 | KD2-H4K8ac_peak_28399 | 7.1181   |                                                                                   |
| 8 | 143695309 | 1.44E+08 | KD2-H4K8ac_peak_28400 | 6.55628  |                                                                                   |
| 8 | 143696321 | 1.44E+08 | KD2-H4K8ac_peak_28401 | 5.29555  | ARC_ENSG00000198576                                                               |
| 8 | 143697768 | 1.44E+08 | KD2-H4K8ac_peak_28402 | 3.90565  | ARC_ENSG00000198576                                                               |
| 8 | 143703200 | 1.44E+08 | KD2-H4K8ac_peak_28403 | 10.19723 |                                                                                   |
| 8 | 143750962 | 1.44E+08 | KD2-H4K8ac_peak_28404 | 11.05467 | PSCA_ENSG00000167653                                                              |
| 8 | 143751620 | 1.44E+08 | KD2-H4K8ac_peak_28405 | 13.44374 | PSCA_ENSG00000167653                                                              |
| 8 | 143755025 | 1.44E+08 | KD2-H4K8ac_peak_28406 | 9.97896  |                                                                                   |
| 8 | 143756253 | 1.44E+08 | KD2-H4K8ac_peak_28407 | 5.84991  |                                                                                   |
| 8 | 143807813 | 1.44E+08 | KD2-H4K8ac_peak_28408 | 10.7186  | CTD-2292P10.4_ENSG00000253741;THEM6_ENSG00000130193;CTD-2292P10.2_ENSG00000253806 |
| 8 | 143820361 | 1.44E+08 | KD2-H4K8ac_peak_28409 | 7.73264  |                                                                                   |
| 8 | 144099585 | 1.44E+08 | KD2-H4K8ac_peak_28410 | 7.76104  | RP11-273G15.2_ENSG00000247317;LY6E_ENSG00000160932                                |
| 8 | 144100348 | 1.44E+08 | KD2-H4K8ac_peak_28411 | 5.96361  | RP11-273G15.2_ENSG00000247317;LY6E_ENSG00000160932                                |
| 8 | 144120846 | 1.44E+08 | KD2-H4K8ac_peak_28412 | 4.37809  | C8orf31_ENSG00000177335                                                           |
| 8 | 144288422 | 1.44E+08 | KD2-H4K8ac_peak_28413 | 5.01262  |                                                                                   |
| 8 | 144329151 | 1.44E+08 | KD2-H4K8ac_peak_28414 | 14.15075 | ZFP41_ENSG00000181638;ZFP41_ENSG00000264668                                       |
| 8 | 144349044 | 1.44E+08 | KD2-H4K8ac_peak_28415 | 19.35989 |                                                                                   |
| 8 | 144358195 | 1.44E+08 | KD2-H4K8ac_peak_28416 | 7.95563  |                                                                                   |
| 8 | 144363522 | 1.44E+08 | KD2-H4K8ac_peak_28417 | 14.12659 | RP13-582O9.5_ENSG00000253716                                                      |
| 8 | 144364190 | 1.44E+08 | KD2-H4K8ac_peak_28418 | 5.88845  | RP13-582O9.5_ENSG00000253716                                                      |
| 8 | 144372676 | 1.44E+08 | KD2-H4K8ac_peak_28419 | 38.73217 | ZNF696_ENSG00000185730;RP13-582O9.7_ENSG00000272172                               |
| 8 | 144417211 | 1.44E+08 | KD2-H4K8ac_peak_28420 | 7.69287  |                                                                                   |
| 8 | 144450321 | 1.44E+08 | KD2-H4K8ac_peak_28421 | 10.17486 | RHPN1-AS1_ENSG00000254389;RHPN1_ENSG00000158106                                   |
| 8 | 144470627 | 1.44E+08 | KD2-H4K8ac_peak_28422 | 8.30974  |                                                                                   |
| 8 | 144489327 | 1.44E+08 | KD2-H4K8ac_peak_28423 | 10.05606 |                                                                                   |
| 8 | 144572121 | 1.45E+08 | KD2-H4K8ac_peak_28424 | 7.13615  |                                                                                   |
| 8 | 144581286 | 1.45E+08 | KD2-H4K8ac_peak_28425 | 5.40498  |                                                                                   |
| 8 | 144587015 | 1.45E+08 | KD2-H4K8ac_peak_28426 | 4.86324  |                                                                                   |

|   |           |          |                       |          |                                                      |
|---|-----------|----------|-----------------------|----------|------------------------------------------------------|
| 8 | 144623301 | 1.45E+08 | KD2-H4K8ac_peak_28427 | 8.1235   | ZC3H3_ENSG00000014164;7SK_ENSG00000254144            |
| 8 | 144624124 | 1.45E+08 | KD2-H4K8ac_peak_28428 | 6.85193  | ZC3H3_ENSG00000014164;7SK_ENSG00000254144            |
| 8 | 144640574 | 1.45E+08 | KD2-H4K8ac_peak_28429 | 9.1707   |                                                      |
| 8 | 144653674 | 1.45E+08 | KD2-H4K8ac_peak_28430 | 8.30974  |                                                      |
| 8 | 144679424 | 1.45E+08 | KD2-H4K8ac_peak_28431 | 8.28234  | TIGD5_ENSG00000179886                                |
| 8 | 144691366 | 1.45E+08 | KD2-H4K8ac_peak_28432 | 7.146    | PYCRL_ENSG00000104524                                |
| 8 | 144699292 | 1.45E+08 | KD2-H4K8ac_peak_28433 | 11.05467 | TSTA3_ENSG00000104522                                |
| 8 | 144717829 | 1.45E+08 | KD2-H4K8ac_peak_28434 | 12.93209 | ZNF623_ENSG00000183309                               |
| 8 | 144765985 | 1.45E+08 | KD2-H4K8ac_peak_28435 | 10.29842 | ZNF707_ENSG00000181135                               |
| 8 | 144798506 | 1.45E+08 | KD2-H4K8ac_peak_28436 | 8.85813  | MAPK15_ENSG00000181085                               |
| 8 | 144897164 | 1.45E+08 | KD2-H4K8ac_peak_28437 | 4.211    | SCRIB_ENSG00000180900                                |
| 8 | 144898100 | 1.45E+08 | KD2-H4K8ac_peak_28438 | 13.9234  | SCRIB_ENSG00000180900                                |
| 8 | 144910666 | 1.45E+08 | KD2-H4K8ac_peak_28439 | 17.27647 | PUF60_ENSG00000179950                                |
| 8 | 144911771 | 1.45E+08 | KD2-H4K8ac_peak_28440 | 11.55418 | PUF60_ENSG00000179950                                |
| 8 | 144922525 | 1.45E+08 | KD2-H4K8ac_peak_28441 | 14.51306 |                                                      |
| 8 | 145023934 | 1.45E+08 | KD2-H4K8ac_peak_28442 | 5.12715  |                                                      |
| 8 | 145024556 | 1.45E+08 | KD2-H4K8ac_peak_28443 | 6.93012  |                                                      |
| 8 | 145026445 | 1.45E+08 | KD2-H4K8ac_peak_28444 | 11.6867  |                                                      |
| 8 | 145028189 | 1.45E+08 | KD2-H4K8ac_peak_28445 | 4.37809  |                                                      |
| 8 | 145048667 | 1.45E+08 | KD2-H4K8ac_peak_28446 | 7.44324  |                                                      |
| 8 | 145050482 | 1.45E+08 | KD2-H4K8ac_peak_28447 | 6.99815  | PLEC_ENSG00000178209                                 |
| 8 | 145051019 | 1.45E+08 | KD2-H4K8ac_peak_28448 | 8.2413   | PLEC_ENSG00000178209                                 |
| 8 | 145132956 | 1.45E+08 | KD2-H4K8ac_peak_28449 | 8.85813  | CTD-3065J16.9_ENSG00000255224;EXOSC4_ENSG00000178896 |
| 8 | 145133679 | 1.45E+08 | KD2-H4K8ac_peak_28450 | 9.32062  | CTD-3065J16.9_ENSG00000255224;EXOSC4_ENSG00000178896 |
| 8 | 145150018 | 1.45E+08 | KD2-H4K8ac_peak_28451 | 15.25814 | CYC1_ENSG00000179091                                 |
| 8 | 145158294 | 1.45E+08 | KD2-H4K8ac_peak_28452 | 10.96455 | MAF1_ENSG00000179632                                 |
| 8 | 145326411 | 1.45E+08 | KD2-H4K8ac_peak_28453 | 14.74047 |                                                      |
| 8 | 145330329 | 1.45E+08 | KD2-H4K8ac_peak_28454 | 14.8083  | KM-PA-2_ENSG00000204775                              |
| 8 | 145549858 | 1.46E+08 | KD2-H4K8ac_peak_28455 | 15.9754  | DGAT1_ENSG00000185000                                |
| 8 | 145550710 | 1.46E+08 | KD2-H4K8ac_peak_28456 | 24.42768 | DGAT1_ENSG00000185000                                |
| 8 | 145560881 | 1.46E+08 | KD2-H4K8ac_peak_28457 | 15.22643 | SCRT1_ENSG00000170616                                |
| 8 | 145581756 | 1.46E+08 | KD2-H4K8ac_peak_28458 | 14.48922 | FBXL6_ENSG00000182325                                |
| 8 | 145595734 | 1.46E+08 | KD2-H4K8ac_peak_28459 | 10.05606 | ADCK5_ENSG00000173137                                |
| 8 | 145596852 | 1.46E+08 | KD2-H4K8ac_peak_28460 | 8.55271  | ADCK5_ENSG00000173137                                |
| 8 | 145597906 | 1.46E+08 | KD2-H4K8ac_peak_28461 | 4.44527  |                                                      |
| 8 | 145634331 | 1.46E+08 | KD2-H4K8ac_peak_28462 | 13.92465 | CPSF1_ENSG00000071894;GS1-393G12.14_ENSG00000272115  |
| 8 | 145638628 | 1.46E+08 | KD2-H4K8ac_peak_28463 | 25.83566 |                                                      |
| 8 | 145639839 | 1.46E+08 | KD2-H4K8ac_peak_28464 | 5.94347  |                                                      |
| 8 | 145652832 | 1.46E+08 | KD2-H4K8ac_peak_28465 | 19.88883 | VPS28_ENSG00000160948                                |
| 8 | 145654052 | 1.46E+08 | KD2-H4K8ac_peak_28466 | 6.90231  | VPS28_ENSG00000160948                                |
| 8 | 145669242 | 1.46E+08 | KD2-H4K8ac_peak_28467 | 14.72959 | TONSL_ENSG00000160949                                |
| 8 | 145670015 | 1.46E+08 | KD2-H4K8ac_peak_28468 | 11.89502 | TONSL_ENSG00000160949                                |
| 8 | 145702708 | 1.46E+08 | KD2-H4K8ac_peak_28469 | 9.1707   | FOXH1_ENSG00000160973;PPP1R16A_ENSG00000160972       |
| 8 | 145703430 | 1.46E+08 | KD2-H4K8ac_peak_28470 | 9.63487  | PPP1R16A_ENSG00000160972                             |
| 8 | 145704650 | 1.46E+08 | KD2-H4K8ac_peak_28471 | 5.75757  |                                                      |
| 8 | 145722402 | 1.46E+08 | KD2-H4K8ac_peak_28472 | 4.71229  |                                                      |

|   |           |          |                       |          |                                                     |
|---|-----------|----------|-----------------------|----------|-----------------------------------------------------|
| 8 | 145728070 | 1.46E+08 | KD2-H4K8ac_peak_28473 | 5.30799  | GPT_ENSG00000167701                                 |
| 8 | 145733470 | 1.46E+08 | KD2-H4K8ac_peak_28474 | 13.21979 | MFSD3_ENSG00000167700                               |
| 8 | 145747362 | 1.46E+08 | KD2-H4K8ac_peak_28475 | 8.79106  |                                                     |
| 8 | 145747933 | 1.46E+08 | KD2-H4K8ac_peak_28476 | 15.61313 |                                                     |
| 8 | 145751654 | 1.46E+08 | KD2-H4K8ac_peak_28477 | 3.97079  | LRRC24_ENSG00000254402                              |
| 8 | 145754122 | 1.46E+08 | KD2-H4K8ac_peak_28478 | 31.49773 | C8orf82_ENSG00000213563                             |
| 8 | 145755394 | 1.46E+08 | KD2-H4K8ac_peak_28479 | 3.90565  | C8orf82_ENSG00000213563                             |
| 8 | 145926284 | 1.46E+08 | KD2-H4K8ac_peak_28480 | 7.47462  | AF186192.5_ENSG00000255085                          |
| 8 | 145980360 | 1.46E+08 | KD2-H4K8ac_peak_28481 | 9.08816  | ZNF251_ENSG00000198169                              |
| 8 | 145981088 | 1.46E+08 | KD2-H4K8ac_peak_28482 | 14.56955 | ZNF251_ENSG00000198169                              |
| 8 | 145987406 | 1.46E+08 | KD2-H4K8ac_peak_28483 | 4.9025   |                                                     |
| 8 | 146011561 | 1.46E+08 | KD2-H4K8ac_peak_28484 | 6.66692  | ZNF34_ENSG00000196378;RN7SL395P_ENSG00000244307     |
| 8 | 146017288 | 1.46E+08 | KD2-H4K8ac_peak_28485 | 15.52826 | RPL8_ENSG00000161016                                |
| 8 | 146023506 | 1.46E+08 | KD2-H4K8ac_peak_28486 | 11.92978 | ZNF517_ENSG00000197363                              |
| 8 | 146052303 | 1.46E+08 | KD2-H4K8ac_peak_28487 | 9.65086  | ZNF7_ENSG00000147789                                |
| 8 | 146052997 | 1.46E+08 | KD2-H4K8ac_peak_28488 | 16.57619 | ZNF7_ENSG00000147789                                |
| 8 | 146077834 | 1.46E+08 | KD2-H4K8ac_peak_28489 | 8.58069  | COMMD5_ENSG00000170619;AF235103.1_ENSG00000263640   |
| 8 | 146078716 | 1.46E+08 | KD2-H4K8ac_peak_28490 | 7.67504  | COMMD5_ENSG00000170619;AF235103.1_ENSG00000263640   |
| 8 | 146127132 | 1.46E+08 | KD2-H4K8ac_peak_28491 | 26.59781 | ZNF250_ENSG00000196150                              |
| 8 | 146175609 | 1.46E+08 | KD2-H4K8ac_peak_28492 | 16.64426 | ZNF16_ENSG00000170631                               |
| 8 | 146227875 | 1.46E+08 | KD2-H4K8ac_peak_28493 | 11.92978 | ZNF252P_ENSG00000196922;ZNF252P-AS1_ENSG00000255559 |
| 8 | 146228503 | 1.46E+08 | KD2-H4K8ac_peak_28494 | 7.47462  | ZNF252P_ENSG00000196922;ZNF252P-AS1_ENSG00000255559 |
| 8 | 146277890 | 1.46E+08 | KD2-H4K8ac_peak_28495 | 17.42905 | C8orf33_ENSG00000182307                             |
| 9 | 469753    | 470094   | KD2-H4K8ac_peak_28496 | 9.15329  | KANK1_ENSG00000107104                               |
| 9 | 2157616   | 2157824  | KD2-H4K8ac_peak_28497 | 5.14125  |                                                     |
| 9 | 2158904   | 2159170  | KD2-H4K8ac_peak_28498 | 5.25071  |                                                     |
| 9 | 2241427   | 2241957  | KD2-H4K8ac_peak_28499 | 8.53092  |                                                     |
| 9 | 2242498   | 2242909  | KD2-H4K8ac_peak_28500 | 12.00273 |                                                     |
| 9 | 2260523   | 2260908  | KD2-H4K8ac_peak_28501 | 9.15329  |                                                     |
| 9 | 2620957   | 2621681  | KD2-H4K8ac_peak_28502 | 14.15075 | VLDLR_ENSG00000147852                               |
| 9 | 2622550   | 2622957  | KD2-H4K8ac_peak_28503 | 7.36799  | VLDLR_ENSG00000147852                               |
| 9 | 2723768   | 2724067  | KD2-H4K8ac_peak_28504 | 4.35346  |                                                     |
| 9 | 2843824   | 2844068  | KD2-H4K8ac_peak_28505 | 7.76104  | KIAA0020_ENSG00000080608                            |
| 9 | 3526090   | 3527102  | KD2-H4K8ac_peak_28506 | 22.21705 | RFX3_ENSG00000080298;RP11-509J21.1_ENSG00000232104  |
| 9 | 3823765   | 3823981  | KD2-H4K8ac_peak_28507 | 5.71749  |                                                     |
| 9 | 3936745   | 3937157  | KD2-H4K8ac_peak_28508 | 5.25071  |                                                     |
| 9 | 4297501   | 4297843  | KD2-H4K8ac_peak_28509 | 10.05606 |                                                     |
| 9 | 4490671   | 4490975  | KD2-H4K8ac_peak_28510 | 4.211    | SLC1A1_ENSG00000106688                              |
| 9 | 4662293   | 4662914  | KD2-H4K8ac_peak_28511 | 15.22643 | PPAPDC2_ENSG00000205808                             |
| 9 | 4666063   | 4666431  | KD2-H4K8ac_peak_28512 | 10.0692  | SPATA6L_ENSG00000106686                             |
| 9 | 4740564   | 4741119  | KD2-H4K8ac_peak_28513 | 11.05467 | AK3_ENSG00000147853                                 |
| 9 | 4741403   | 4741783  | KD2-H4K8ac_peak_28514 | 17.70837 | AK3_ENSG00000147853                                 |
| 9 | 4792975   | 4793231  | KD2-H4K8ac_peak_28515 | 4.67342  | RCL1_ENSG00000120158                                |
| 9 | 4984378   | 4984815  | KD2-H4K8ac_peak_28516 | 17.55491 | JAK2_ENSG00000096968                                |
| 9 | 4985440   | 4985656  | KD2-H4K8ac_peak_28517 | 5.34636  | JAK2_ENSG00000096968                                |
| 9 | 5339615   | 5339936  | KD2-H4K8ac_peak_28518 | 17.14886 | RLN1_ENSG00000107018                                |



|   |          |          |                       |          |                                                    |
|---|----------|----------|-----------------------|----------|----------------------------------------------------|
| 9 | 5437431  | 5437792  | KD2-H4K8ac_peak_28519 | 12.82393 | PLGRKT_ENSG00000107020                             |
| 9 | 5438080  | 5438710  | KD2-H4K8ac_peak_28520 | 12.06346 | PLGRKT_ENSG00000107020                             |
| 9 | 5628514  | 5628915  | KD2-H4K8ac_peak_28521 | 6.90231  | KIAA1432_ENSG00000107036                           |
| 9 | 5629149  | 5629449  | KD2-H4K8ac_peak_28522 | 9.11891  | KIAA1432_ENSG00000107036                           |
| 9 | 5832533  | 5833147  | KD2-H4K8ac_peak_28523 | 10.05606 | ERMP1_ENSG00000099219                              |
| 9 | 6008076  | 6008334  | KD2-H4K8ac_peak_28524 | 10.1591  | KIAA2026_ENSG00000183354;MIR4665_ENSG00000263575   |
| 9 | 6015764  | 6016088  | KD2-H4K8ac_peak_28525 | 10.72656 | RANBP6_ENSG00000137040                             |
| 9 | 6080045  | 6080318  | KD2-H4K8ac_peak_28526 | 10.21502 |                                                    |
| 9 | 6106781  | 6107213  | KD2-H4K8ac_peak_28527 | 5.88845  |                                                    |
| 9 | 6412356  | 6413033  | KD2-H4K8ac_peak_28528 | 10.08707 | UHRF2_ENSG00000147854                              |
| 9 | 6413275  | 6413702  | KD2-H4K8ac_peak_28529 | 7.146    | UHRF2_ENSG00000147854                              |
| 9 | 6549430  | 6549666  | KD2-H4K8ac_peak_28530 | 4.86324  |                                                    |
| 9 | 6645066  | 6645603  | KD2-H4K8ac_peak_28531 | 11.50346 | RP11-390F4.6_ENSG00000236924                       |
| 9 | 6680756  | 6681999  | KD2-H4K8ac_peak_28532 | 18.5703  |                                                    |
| 9 | 6703492  | 6704068  | KD2-H4K8ac_peak_28533 | 12.25733 | RP11-390F4.10_ENSG00000229611                      |
| 9 | 6704547  | 6704836  | KD2-H4K8ac_peak_28534 | 5.98692  | RP11-390F4.10_ENSG00000229611                      |
| 9 | 6869492  | 6869786  | KD2-H4K8ac_peak_28535 | 8.55271  |                                                    |
| 9 | 6924312  | 6924540  | KD2-H4K8ac_peak_28536 | 8.74596  |                                                    |
| 9 | 7175891  | 7176264  | KD2-H4K8ac_peak_28537 | 5.64449  |                                                    |
| 9 | 7799499  | 7799711  | KD2-H4K8ac_peak_28538 | 9.11031  |                                                    |
| 9 | 8857269  | 8858451  | KD2-H4K8ac_peak_28539 | 9.11031  | RP11-75C9.1_ENSG00000225706                        |
| 9 | 12708138 | 12708488 | KD2-H4K8ac_peak_28540 | 7.01964  |                                                    |
| 9 | 12718579 | 12718987 | KD2-H4K8ac_peak_28541 | 6.40297  |                                                    |
| 9 | 13278140 | 13279209 | KD2-H4K8ac_peak_28542 | 11.24702 | MPDZ_ENSG00000107186;RP11-272P10.2_ENSG00000234740 |
| 9 | 13279479 | 13279932 | KD2-H4K8ac_peak_28543 | 4.211    | MPDZ_ENSG00000107186;RP11-272P10.2_ENSG00000234740 |
| 9 | 13431054 | 13431534 | KD2-H4K8ac_peak_28544 | 20.31556 |                                                    |
| 9 | 13514052 | 13514359 | KD2-H4K8ac_peak_28545 | 5.08628  |                                                    |
| 9 | 13791858 | 13792077 | KD2-H4K8ac_peak_28546 | 4.35346  |                                                    |
| 9 | 14058299 | 14058493 | KD2-H4K8ac_peak_28547 | 8.4716   |                                                    |
| 9 | 14096312 | 14096591 | KD2-H4K8ac_peak_28548 | 3.75035  |                                                    |
| 9 | 14097351 | 14097701 | KD2-H4K8ac_peak_28549 | 6.16888  |                                                    |
| 9 | 14313101 | 14313400 | KD2-H4K8ac_peak_28550 | 13.59098 |                                                    |
| 9 | 14314280 | 14314473 | KD2-H4K8ac_peak_28551 | 12.06346 |                                                    |
| 9 | 14314904 | 14315443 | KD2-H4K8ac_peak_28552 | 16.57619 |                                                    |
| 9 | 14315680 | 14316705 | KD2-H4K8ac_peak_28553 | 10.19949 | RP11-120J1.1_ENSG00000225472                       |
| 9 | 14317100 | 14317503 | KD2-H4K8ac_peak_28554 | 5.75452  | RP11-120J1.1_ENSG00000225472                       |
| 9 | 14322283 | 14323112 | KD2-H4K8ac_peak_28555 | 18.5703  |                                                    |
| 9 | 14327451 | 14327656 | KD2-H4K8ac_peak_28556 | 6.07178  |                                                    |
| 9 | 14343323 | 14343692 | KD2-H4K8ac_peak_28557 | 4.77079  |                                                    |
| 9 | 14402995 | 14403428 | KD2-H4K8ac_peak_28558 | 6.56926  |                                                    |
| 9 | 14435077 | 14435386 | KD2-H4K8ac_peak_28559 | 6.81873  |                                                    |
| 9 | 14438555 | 14439718 | KD2-H4K8ac_peak_28560 | 12.3187  |                                                    |
| 9 | 14515468 | 14515875 | KD2-H4K8ac_peak_28561 | 16.32216 |                                                    |
| 9 | 14692758 | 14694208 | KD2-H4K8ac_peak_28562 | 18.33962 | ZDHHC21_ENSG00000175893                            |
| 9 | 14993409 | 14993619 | KD2-H4K8ac_peak_28563 | 13.44374 | RP11-54D18.2_ENSG00000215237                       |
| 9 | 15002491 | 15002685 | KD2-H4K8ac_peak_28564 | 4.01115  |                                                    |

|   |          |          |                       |          |                                                       |
|---|----------|----------|-----------------------|----------|-------------------------------------------------------|
| 9 | 15134805 | 15135157 | KD2-H4K8ac_peak_28565 | 8.4939   |                                                       |
| 9 | 15135391 | 15135607 | KD2-H4K8ac_peak_28566 | 10.58496 |                                                       |
| 9 | 15306855 | 15307730 | KD2-H4K8ac_peak_28567 | 11.2938  | TTC39B_ENSG00000155158                                |
| 9 | 15422251 | 15422633 | KD2-H4K8ac_peak_28568 | 12.93209 | SNAPC3_ENSG00000164975                                |
| 9 | 15422917 | 15423327 | KD2-H4K8ac_peak_28569 | 7.76104  | SNAPC3_ENSG00000164975                                |
| 9 | 15510456 | 15511514 | KD2-H4K8ac_peak_28570 | 9.36516  | PSIP1_ENSG00000164985                                 |
| 9 | 15552429 | 15552757 | KD2-H4K8ac_peak_28571 | 11.50346 | CCDC171_ENSG00000164989                               |
| 9 | 16192055 | 16192350 | KD2-H4K8ac_peak_28572 | 5.25071  |                                                       |
| 9 | 16277720 | 16278094 | KD2-H4K8ac_peak_28573 | 6.04107  |                                                       |
| 9 | 16726860 | 16727235 | KD2-H4K8ac_peak_28574 | 8.83582  | RP11-62F24.2_ENSG00000234779                          |
| 9 | 17066101 | 17066332 | KD2-H4K8ac_peak_28575 | 5.25071  |                                                       |
| 9 | 17134466 | 17135553 | KD2-H4K8ac_peak_28576 | 17.09929 | CNTLN_ENSG00000044459                                 |
| 9 | 19048907 | 19049245 | KD2-H4K8ac_peak_28577 | 7.36799  | RRAGA_ENSG00000155876                                 |
| 9 | 19127204 | 19127464 | KD2-H4K8ac_peak_28578 | 9.95119  |                                                       |
| 9 | 19127668 | 19129420 | KD2-H4K8ac_peak_28579 | 7.70289  |                                                       |
| 9 | 19229873 | 19230288 | KD2-H4K8ac_peak_28580 | 5.30799  | DENND4C_ENSG00000137145                               |
| 9 | 19230726 | 19231236 | KD2-H4K8ac_peak_28581 | 10.43145 | DENND4C_ENSG00000137145                               |
| 9 | 19379751 | 19380130 | KD2-H4K8ac_peak_28582 | 10.96455 | RPS6_ENSG00000137154                                  |
| 9 | 19380450 | 19380690 | KD2-H4K8ac_peak_28583 | 10.05606 | RPS6_ENSG00000137154                                  |
| 9 | 19408458 | 19408655 | KD2-H4K8ac_peak_28584 | 4.35724  | ACER2_ENSG00000177076                                 |
| 9 | 20350622 | 20351024 | KD2-H4K8ac_peak_28585 | 4.42765  |                                                       |
| 9 | 20658350 | 20658544 | KD2-H4K8ac_peak_28586 | 7.12754  | FOCAD_ENSG00000188352                                 |
| 9 | 20684339 | 20684575 | KD2-H4K8ac_peak_28587 | 4.86324  | RP11-4E23.2_ENSG00000227071                           |
| 9 | 21334961 | 21335363 | KD2-H4K8ac_peak_28588 | 13.73635 | KLHL9_ENSG00000198642                                 |
| 9 | 21801919 | 21802323 | KD2-H4K8ac_peak_28589 | 12.32214 | MTAP_ENSG00000099810;RP11-145E5.5_ENSG00000264545     |
| 9 | 21994147 | 21994373 | KD2-H4K8ac_peak_28590 | 7.22457  | CDKN2A_ENSG00000147889;CDKN2B-AS1_ENSG00000240498     |
| 9 | 23821531 | 23821723 | KD2-H4K8ac_peak_28591 | 4.44527  |                                                       |
| 9 | 25677795 | 25678612 | KD2-H4K8ac_peak_28592 | 14.55656 | TUSC1_ENSG00000198680                                 |
| 9 | 26892388 | 26892973 | KD2-H4K8ac_peak_28593 | 22.07309 | CAAP1_ENSG00000120159                                 |
| 9 | 26893328 | 26893576 | KD2-H4K8ac_peak_28594 | 9.15329  | CAAP1_ENSG00000120159                                 |
| 9 | 26947300 | 26947655 | KD2-H4K8ac_peak_28595 | 10.0692  | PLAA_ENSG00000137055;IFT74_ENSG00000096872            |
| 9 | 27529442 | 27529650 | KD2-H4K8ac_peak_28596 | 4.37815  | MOB3B_ENSG00000120162                                 |
| 9 | 27572927 | 27573391 | KD2-H4K8ac_peak_28597 | 9.15329  | C9orf72_ENSG00000147894                               |
| 9 | 27829293 | 27829841 | KD2-H4K8ac_peak_28598 | 5.73839  | RP11-575I8.1_ENSG00000260390                          |
| 9 | 27835214 | 27835411 | KD2-H4K8ac_peak_28599 | 4.86324  |                                                       |
| 9 | 29211986 | 29212332 | KD2-H4K8ac_peak_28600 | 14.15075 |                                                       |
| 9 | 30140598 | 30140827 | KD2-H4K8ac_peak_28601 | 5.25071  |                                                       |
| 9 | 32550564 | 32550841 | KD2-H4K8ac_peak_28602 | 8.62078  | TOPORS-AS1_ENSG00000235453                            |
| 9 | 32552421 | 32552857 | KD2-H4K8ac_peak_28603 | 6.31143  | TOPORS_ENSG00000197579;AL353671.3_ENSG00000203659     |
| 9 | 32783032 | 32783777 | KD2-H4K8ac_peak_28604 | 7.69287  | TMEM215_ENSG00000188133                               |
| 9 | 33025315 | 33025646 | KD2-H4K8ac_peak_28605 | 7.11824  | APTX_ENSG00000137074;DNAJA1_ENSG00000086061           |
| 9 | 33044311 | 33044735 | KD2-H4K8ac_peak_28606 | 7.69287  |                                                       |
| 9 | 33076119 | 33076548 | KD2-H4K8ac_peak_28607 | 5.34636  | SMU1_ENSG00000122692                                  |
| 9 | 33166925 | 33167197 | KD2-H4K8ac_peak_28608 | 6.99194  | B4GALT1_ENSG00000086062;RP11-326F20.5_ENSG00000233554 |
| 9 | 33167528 | 33168092 | KD2-H4K8ac_peak_28609 | 16.3889  | B4GALT1_ENSG00000086062;RP11-326F20.5_ENSG00000233554 |
| 9 | 33288971 | 33289350 | KD2-H4K8ac_peak_28610 | 9.15329  |                                                       |

|   |          |          |                       |          |                                                      |
|---|----------|----------|-----------------------|----------|------------------------------------------------------|
| 9 | 33289606 | 33289826 | KD2-H4K8ac_peak_28611 | 10.21502 | NFX1_ENSG00000086102                                 |
| 9 | 33290657 | 33291016 | KD2-H4K8ac_peak_28612 | 11.22681 | NFX1_ENSG00000086102                                 |
| 9 | 33510404 | 33511270 | KD2-H4K8ac_peak_28613 | 22.95488 | SUGT1P_ENSG00000226823                               |
| 9 | 33523695 | 33524262 | KD2-H4K8ac_peak_28614 | 12.23    | ANKRD18B_ENSG00000230453                             |
| 9 | 33524567 | 33524845 | KD2-H4K8ac_peak_28615 | 6.65673  | ANKRD18B_ENSG00000230453                             |
| 9 | 33676638 | 33677478 | KD2-H4K8ac_peak_28616 | 15.81711 | PTENP1_ENSG00000237984                               |
| 9 | 33721822 | 33722108 | KD2-H4K8ac_peak_28617 | 6.99815  |                                                      |
| 9 | 33750277 | 33751154 | KD2-H4K8ac_peak_28618 | 12.00597 | PRSS3_ENSG0000010438                                 |
| 9 | 33815836 | 33816950 | KD2-H4K8ac_peak_28619 | 9.36516  | UBE2R2_ENSG00000107341                               |
| 9 | 33817325 | 33818071 | KD2-H4K8ac_peak_28620 | 11.50346 | RP11-133O22.6_ENSG00000235481;UBE2R2_ENSG00000107341 |
| 9 | 34048589 | 34049749 | KD2-H4K8ac_peak_28621 | 14.66631 | UBAP2_ENSG00000137073;RN7SKP114_ENSG00000222259      |
| 9 | 34049950 | 34050164 | KD2-H4K8ac_peak_28622 | 7.96322  | RN7SKP114_ENSG00000222259                            |
| 9 | 34074083 | 34074344 | KD2-H4K8ac_peak_28623 | 8.41122  |                                                      |
| 9 | 34126145 | 34127772 | KD2-H4K8ac_peak_28624 | 10.77174 | DCAF12_ENSG00000198876                               |
| 9 | 34178487 | 34178751 | KD2-H4K8ac_peak_28625 | 4.06758  | UBAP1_ENSG00000165006                                |
| 9 | 34329718 | 34330274 | KD2-H4K8ac_peak_28626 | 7.36799  | KIF24_ENSG00000186638;NUDT2_ENSG00000164978          |
| 9 | 34376993 | 34377366 | KD2-H4K8ac_peak_28627 | 8.55271  | KIAA1161_ENSG00000164976                             |
| 9 | 34380224 | 34381380 | KD2-H4K8ac_peak_28628 | 7.49599  |                                                      |
| 9 | 34425340 | 34425549 | KD2-H4K8ac_peak_28629 | 4.68932  |                                                      |
| 9 | 34426805 | 34427320 | KD2-H4K8ac_peak_28630 | 9.242    |                                                      |
| 9 | 34522677 | 34522942 | KD2-H4K8ac_peak_28631 | 5.64566  | ENHO_ENSG00000168913                                 |
| 9 | 34523383 | 34523728 | KD2-H4K8ac_peak_28632 | 6.48713  | ENHO_ENSG00000168913                                 |
| 9 | 34547736 | 34547950 | KD2-H4K8ac_peak_28633 | 6.66692  | RP11-296L22.7_ENSG00000232983                        |
| 9 | 34553284 | 34553767 | KD2-H4K8ac_peak_28634 | 5.30799  |                                                      |
| 9 | 34554113 | 34554448 | KD2-H4K8ac_peak_28635 | 13.87818 |                                                      |
| 9 | 34554779 | 34555088 | KD2-H4K8ac_peak_28636 | 6.20982  |                                                      |
| 9 | 34555346 | 34555782 | KD2-H4K8ac_peak_28637 | 9.34195  |                                                      |
| 9 | 34558779 | 34560555 | KD2-H4K8ac_peak_28638 | 13.13969 |                                                      |
| 9 | 34560766 | 34561235 | KD2-H4K8ac_peak_28639 | 8.30974  |                                                      |
| 9 | 34566408 | 34566639 | KD2-H4K8ac_peak_28640 | 4.06758  |                                                      |
| 9 | 34570836 | 34571539 | KD2-H4K8ac_peak_28641 | 16.91113 |                                                      |
| 9 | 34571747 | 34572065 | KD2-H4K8ac_peak_28642 | 6.67092  |                                                      |
| 9 | 34577200 | 34577478 | KD2-H4K8ac_peak_28643 | 4.67342  |                                                      |
| 9 | 34577715 | 34579224 | KD2-H4K8ac_peak_28644 | 15.81711 |                                                      |
| 9 | 34579593 | 34579984 | KD2-H4K8ac_peak_28645 | 8.55271  |                                                      |
| 9 | 34580295 | 34580490 | KD2-H4K8ac_peak_28646 | 9.90914  |                                                      |
| 9 | 34583063 | 34583528 | KD2-H4K8ac_peak_28647 | 7.9265   |                                                      |
| 9 | 34589332 | 34590554 | KD2-H4K8ac_peak_28648 | 20.97251 | CNTFR_ENSG00000122756                                |
| 9 | 34611761 | 34612655 | KD2-H4K8ac_peak_28649 | 23.0142  | RPP25L_ENSG00000164967                               |
| 9 | 34620935 | 34621144 | KD2-H4K8ac_peak_28650 | 4.8402   | DCTN3_ENSG00000137100                                |
| 9 | 34637235 | 34637708 | KD2-H4K8ac_peak_28651 | 10.19949 | SIGMAR1_ENSG00000147955;GALT_ENSG00000213930         |
| 9 | 34637932 | 34638518 | KD2-H4K8ac_peak_28652 | 13.36684 | SIGMAR1_ENSG00000147955;GALT_ENSG00000213930         |
| 9 | 34646655 | 34646978 | KD2-H4K8ac_peak_28653 | 17.8868  | GALT_ENSG00000258728                                 |
| 9 | 34653097 | 34653482 | KD2-H4K8ac_peak_28654 | 5.14125  |                                                      |
| 9 | 34653937 | 34654359 | KD2-H4K8ac_peak_28655 | 13.81781 |                                                      |
| 9 | 34654936 | 34655438 | KD2-H4K8ac_peak_28656 | 8.61676  |                                                      |

|   |          |          |                       |          |                                                                                                                  |
|---|----------|----------|-----------------------|----------|------------------------------------------------------------------------------------------------------------------|
| 9 | 34664728 | 34665302 | KD2-H4K8ac_peak_28657 | 7.29632  | CCL27_ENSG00000213927;RP11-195F19.30_ENSG00000261215;RP11-195F19.5_ENSG00000187186;RP11-195F19.9_ENSG00000230074 |
| 9 | 34701516 | 34701773 | KD2-H4K8ac_peak_28658 | 9.76452  |                                                                                                                  |
| 9 | 34988310 | 34988686 | KD2-H4K8ac_peak_28659 | 5.80249  | DNAJB5_ENSG00000137094                                                                                           |
| 9 | 34988891 | 34989348 | KD2-H4K8ac_peak_28660 | 19.1048  | DNAJB5_ENSG00000137094                                                                                           |
| 9 | 34993034 | 34993792 | KD2-H4K8ac_peak_28661 | 10.72656 |                                                                                                                  |
| 9 | 35072365 | 35072561 | KD2-H4K8ac_peak_28662 | 8.53092  | VCP_ENSG00000165280                                                                                              |
| 9 | 35073037 | 35073314 | KD2-H4K8ac_peak_28663 | 7.47462  | VCP_ENSG00000165280                                                                                              |
| 9 | 35079516 | 35080006 | KD2-H4K8ac_peak_28664 | 11.05407 | FANCG_ENSG00000221829                                                                                            |
| 9 | 35080699 | 35080931 | KD2-H4K8ac_peak_28665 | 5.20908  | FANCG_ENSG00000221829                                                                                            |
| 9 | 35095485 | 35095865 | KD2-H4K8ac_peak_28666 | 6.40683  | PIGO_ENSG00000165282;RP11-182N22.8_ENSG00000234181                                                               |
| 9 | 35096279 | 35096605 | KD2-H4K8ac_peak_28667 | 17.43561 | PIGO_ENSG00000165282;RP11-182N22.8_ENSG00000234181                                                               |
| 9 | 35102574 | 35103082 | KD2-H4K8ac_peak_28668 | 6.0605   | STOML2_ENSG00000165283                                                                                           |
| 9 | 35111195 | 35111469 | KD2-H4K8ac_peak_28669 | 7.55771  |                                                                                                                  |
| 9 | 35114463 | 35114702 | KD2-H4K8ac_peak_28670 | 6.83936  |                                                                                                                  |
| 9 | 35489645 | 35490908 | KD2-H4K8ac_peak_28671 | 11.50346 | RUSC2_ENSG00000198853                                                                                            |
| 9 | 35538602 | 35538826 | KD2-H4K8ac_peak_28672 | 7.44324  |                                                                                                                  |
| 9 | 35603038 | 35603338 | KD2-H4K8ac_peak_28673 | 8.30094  |                                                                                                                  |
| 9 | 35605458 | 35605764 | KD2-H4K8ac_peak_28674 | 6.99815  | TESK1_ENSG00000107140                                                                                            |
| 9 | 35606158 | 35606410 | KD2-H4K8ac_peak_28675 | 6.66099  | TESK1_ENSG00000107140                                                                                            |
| 9 | 35616986 | 35617580 | KD2-H4K8ac_peak_28676 | 6.66692  |                                                                                                                  |
| 9 | 35646984 | 35647490 | KD2-H4K8ac_peak_28677 | 18.31034 | CD72_ENSG00000137101;RP11-331F9.4_ENSG00000227933                                                                |
| 9 | 35657255 | 35657511 | KD2-H4K8ac_peak_28678 | 6.0073   | RMRP_ENSG00000269900;CCDC107_ENSG00000159884                                                                     |
| 9 | 35658420 | 35658923 | KD2-H4K8ac_peak_28679 | 7.36799  | RMRP_ENSG00000269900;CCDC107_ENSG00000159884                                                                     |
| 9 | 35664784 | 35665165 | KD2-H4K8ac_peak_28680 | 10.30284 |                                                                                                                  |
| 9 | 35665469 | 35665727 | KD2-H4K8ac_peak_28681 | 6.66692  |                                                                                                                  |
| 9 | 35675155 | 35675531 | KD2-H4K8ac_peak_28682 | 5.14125  | ARHGEF39_ENSG00000137135                                                                                         |
| 9 | 35675778 | 35676587 | KD2-H4K8ac_peak_28683 | 25.44388 | ARHGEF39_ENSG00000137135                                                                                         |
| 9 | 35690896 | 35691454 | KD2-H4K8ac_peak_28684 | 9.1707   | TPM2_ENSG00000198467                                                                                             |
| 9 | 35731806 | 35732399 | KD2-H4K8ac_peak_28685 | 11.05407 | TLN1_ENSG00000137076;CREB3_ENSG00000107175                                                                       |
| 9 | 35732688 | 35732945 | KD2-H4K8ac_peak_28686 | 4.06758  | TLN1_ENSG00000137076;CREB3_ENSG00000107175                                                                       |
| 9 | 35748864 | 35749871 | KD2-H4K8ac_peak_28687 | 9.07715  | GBA2_ENSG00000070610;RGPI_ENSG00000107185                                                                        |
| 9 | 35756307 | 35757571 | KD2-H4K8ac_peak_28688 | 8.10216  | MSMP_ENSG00000215183;RP11-112J3.15_ENSG00000228843                                                               |
| 9 | 35814647 | 35815004 | KD2-H4K8ac_peak_28689 | 13.12288 | HINT2_ENSG00000137133;TMEM8B_ENSG00000137103                                                                     |
| 9 | 35828710 | 35829052 | KD2-H4K8ac_peak_28690 | 12.51133 | FAM221B_ENSG00000204930                                                                                          |
| 9 | 35829265 | 35829737 | KD2-H4K8ac_peak_28691 | 7.72801  | FAM221B_ENSG00000204930                                                                                          |
| 9 | 35907823 | 35908200 | KD2-H4K8ac_peak_28692 | 4.68059  |                                                                                                                  |
| 9 | 36035909 | 36036756 | KD2-H4K8ac_peak_28693 | 11.05407 | RECK_ENSG00000122707                                                                                             |
| 9 | 36036983 | 36037413 | KD2-H4K8ac_peak_28694 | 8.17902  | RECK_ENSG00000122707                                                                                             |
| 9 | 36135992 | 36137184 | KD2-H4K8ac_peak_28695 | 11.89502 |                                                                                                                  |
| 9 | 36137395 | 36137616 | KD2-H4K8ac_peak_28696 | 6.83936  |                                                                                                                  |
| 9 | 36148358 | 36148681 | KD2-H4K8ac_peak_28697 | 5.61067  |                                                                                                                  |
| 9 | 36149287 | 36149671 | KD2-H4K8ac_peak_28698 | 10.46264 |                                                                                                                  |
| 9 | 36160988 | 36161283 | KD2-H4K8ac_peak_28699 | 5.00214  |                                                                                                                  |
| 9 | 36163616 | 36163836 | KD2-H4K8ac_peak_28700 | 5.82799  |                                                                                                                  |
| 9 | 36166050 | 36166673 | KD2-H4K8ac_peak_28701 | 12.84642 |                                                                                                                  |
| 9 | 36190984 | 36191258 | KD2-H4K8ac_peak_28702 | 10.17486 | CLTA_ENSG00000122705                                                                                             |

|   |          |          |                       |          |                                                           |
|---|----------|----------|-----------------------|----------|-----------------------------------------------------------|
| 9 | 36258202 | 36258424 | KD2-H4K8ac_peak_28703 | 17.8868  |                                                           |
| 9 | 36258632 | 36259227 | KD2-H4K8ac_peak_28704 | 7.36799  |                                                           |
| 9 | 36400278 | 36400825 | KD2-H4K8ac_peak_28705 | 6.25869  |                                                           |
| 9 | 36486805 | 36487390 | KD2-H4K8ac_peak_28706 | 5.30799  | RNF38_ENSG00000137075                                     |
| 9 | 36487880 | 36488473 | KD2-H4K8ac_peak_28707 | 13.73635 | RNF38_ENSG00000137075                                     |
| 9 | 36499261 | 36499909 | KD2-H4K8ac_peak_28708 | 9.11031  |                                                           |
| 9 | 36572072 | 36573083 | KD2-H4K8ac_peak_28709 | 14.66631 | MELK_ENSG00000165304                                      |
| 9 | 36765810 | 36766004 | KD2-H4K8ac_peak_28710 | 6.84261  |                                                           |
| 9 | 36766493 | 36766688 | KD2-H4K8ac_peak_28711 | 8.2413   |                                                           |
| 9 | 36985973 | 36986220 | KD2-H4K8ac_peak_28712 | 9.89126  |                                                           |
| 9 | 37036453 | 37037621 | KD2-H4K8ac_peak_28713 | 13.87818 |                                                           |
| 9 | 37080003 | 37080397 | KD2-H4K8ac_peak_28714 | 9.1707   | RP11-220I1.5_ENSG00000260100;RP11-220I1.1_ENSG00000233137 |
| 9 | 37120585 | 37120906 | KD2-H4K8ac_peak_28715 | 8.85813  | ZCCHC7_ENSG00000147905                                    |
| 9 | 37421975 | 37422558 | KD2-H4K8ac_peak_28716 | 21.70098 | GRHPR_ENSG00000137106                                     |
| 9 | 37422884 | 37423109 | KD2-H4K8ac_peak_28717 | 5.08628  | GRHPR_ENSG00000137106                                     |
| 9 | 37464825 | 37465271 | KD2-H4K8ac_peak_28718 | 9.65086  | ZBTB5_ENSG00000168795                                     |
| 9 | 37466364 | 37466828 | KD2-H4K8ac_peak_28719 | 12.00273 | ZBTB5_ENSG00000168795                                     |
| 9 | 37485251 | 37485721 | KD2-H4K8ac_peak_28720 | 6.20982  | POLR1E_ENSG00000137054                                    |
| 9 | 37575978 | 37576185 | KD2-H4K8ac_peak_28721 | 8.10216  |                                                           |
| 9 | 37576452 | 37576684 | KD2-H4K8ac_peak_28722 | 4.67342  |                                                           |
| 9 | 37592124 | 37592542 | KD2-H4K8ac_peak_28723 | 7.76329  | RP11-613M10.8_ENSG00000256966;TOMM5_ENSG00000175768       |
| 9 | 37594461 | 37594914 | KD2-H4K8ac_peak_28724 | 7.13615  |                                                           |
| 9 | 37650977 | 37651513 | KD2-H4K8ac_peak_28725 | 8.30974  | FRMPD1_ENSG00000070601                                    |
| 9 | 37660081 | 37660302 | KD2-H4K8ac_peak_28726 | 6.31143  |                                                           |
| 9 | 37753437 | 37754265 | KD2-H4K8ac_peak_28727 | 11.24702 | TRMT10B_ENSG00000165275                                   |
| 9 | 37784483 | 37785344 | KD2-H4K8ac_peak_28728 | 7.36799  |                                                           |
| 9 | 37800462 | 37801218 | KD2-H4K8ac_peak_28729 | 6.99815  | EXOSC3_ENSG00000107371;DCAF10_ENSG00000122741             |
| 9 | 37903784 | 37904551 | KD2-H4K8ac_peak_28730 | 7.81533  | SLC25A51_ENSG00000122696                                  |
| 9 | 37904936 | 37905133 | KD2-H4K8ac_peak_28731 | 6.45083  | SLC25A51_ENSG00000122696                                  |
| 9 | 37913942 | 37914171 | KD2-H4K8ac_peak_28732 | 5.14125  |                                                           |
| 9 | 37935327 | 37935675 | KD2-H4K8ac_peak_28733 | 7.69287  |                                                           |
| 9 | 37937545 | 37938289 | KD2-H4K8ac_peak_28734 | 10.62086 | RNU7-124P_ENSG00000251745                                 |
| 9 | 37979377 | 37979691 | KD2-H4K8ac_peak_28735 | 6.03202  |                                                           |
| 9 | 37997280 | 37997525 | KD2-H4K8ac_peak_28736 | 5.20998  |                                                           |
| 9 | 37998437 | 37998707 | KD2-H4K8ac_peak_28737 | 7.45629  |                                                           |
| 9 | 38008996 | 38009455 | KD2-H4K8ac_peak_28738 | 5.23853  |                                                           |
| 9 | 38017630 | 38017840 | KD2-H4K8ac_peak_28739 | 7.146    |                                                           |
| 9 | 38018794 | 38019571 | KD2-H4K8ac_peak_28740 | 6.25869  |                                                           |
| 9 | 38022343 | 38022723 | KD2-H4K8ac_peak_28741 | 8.30974  |                                                           |
| 9 | 38026228 | 38026673 | KD2-H4K8ac_peak_28742 | 6.30229  |                                                           |
| 9 | 38038664 | 38038882 | KD2-H4K8ac_peak_28743 | 9.70057  |                                                           |
| 9 | 38067960 | 38068470 | KD2-H4K8ac_peak_28744 | 6.25869  | RP11-613M10.9_ENSG00000255872;SHB_ENSG00000107338         |
| 9 | 38068710 | 38069172 | KD2-H4K8ac_peak_28745 | 12.93253 | RP11-613M10.9_ENSG00000255872;SHB_ENSG00000107338         |
| 9 | 38069444 | 38070451 | KD2-H4K8ac_peak_28746 | 5.4779   | RP11-613M10.9_ENSG00000255872;SHB_ENSG00000107338         |
| 9 | 38154012 | 38154276 | KD2-H4K8ac_peak_28747 | 7.98621  |                                                           |
| 9 | 38154696 | 38155138 | KD2-H4K8ac_peak_28748 | 8.05311  |                                                           |

|   |          |          |                       |          |                                                         |
|---|----------|----------|-----------------------|----------|---------------------------------------------------------|
| 9 | 38210624 | 38210891 | KD2-H4K8ac_peak_28749 | 12.91453 |                                                         |
| 9 | 38226585 | 38226861 | KD2-H4K8ac_peak_28750 | 8.44476  |                                                         |
| 9 | 38227386 | 38227591 | KD2-H4K8ac_peak_28751 | 5.30799  |                                                         |
| 9 | 38227890 | 38228291 | KD2-H4K8ac_peak_28752 | 4.211    |                                                         |
| 9 | 38229151 | 38229353 | KD2-H4K8ac_peak_28753 | 6.65673  |                                                         |
| 9 | 38232789 | 38233303 | KD2-H4K8ac_peak_28754 | 15.82743 |                                                         |
| 9 | 38235270 | 38235651 | KD2-H4K8ac_peak_28755 | 5.54647  |                                                         |
| 9 | 38251053 | 38251451 | KD2-H4K8ac_peak_28756 | 4.87807  |                                                         |
| 9 | 38284118 | 38284423 | KD2-H4K8ac_peak_28757 | 10.59312 |                                                         |
| 9 | 38310212 | 38310414 | KD2-H4K8ac_peak_28758 | 6.31143  |                                                         |
| 9 | 38345299 | 38345516 | KD2-H4K8ac_peak_28759 | 6.16888  |                                                         |
| 9 | 38370533 | 38370744 | KD2-H4K8ac_peak_28760 | 4.86824  |                                                         |
| 9 | 38371891 | 38372795 | KD2-H4K8ac_peak_28761 | 15.7388  |                                                         |
| 9 | 38392142 | 38393021 | KD2-H4K8ac_peak_28762 | 10.73134 | ALDH1B1_ENSG00000137124                                 |
| 9 | 38400492 | 38400768 | KD2-H4K8ac_peak_28763 | 5.69023  |                                                         |
| 9 | 38421089 | 38421474 | KD2-H4K8ac_peak_28764 | 9.33795  |                                                         |
| 9 | 38422240 | 38423007 | KD2-H4K8ac_peak_28765 | 11.86082 |                                                         |
| 9 | 38423304 | 38423979 | KD2-H4K8ac_peak_28766 | 9.11031  | IGFBPL1_ENSG00000137142                                 |
| 9 | 38424236 | 38424730 | KD2-H4K8ac_peak_28767 | 5.3157   | IGFBPL1_ENSG00000137142                                 |
| 9 | 38620838 | 38621509 | KD2-H4K8ac_peak_28768 | 6.20982  | ANKRD18A_ENSG00000180071;FAM201A_ENSG00000204860        |
| 9 | 38708228 | 38708501 | KD2-H4K8ac_peak_28769 | 6.06203  |                                                         |
| 9 | 38760754 | 38761498 | KD2-H4K8ac_peak_28770 | 7.13615  |                                                         |
| 9 | 41954419 | 41955124 | KD2-H4K8ac_peak_28771 | 30.86785 | RP11-104G3.2_ENSG00000229273                            |
| 9 | 45355917 | 45356986 | KD2-H4K8ac_peak_28772 | 27.01413 |                                                         |
| 9 | 45441092 | 45441336 | KD2-H4K8ac_peak_28773 | 12.42547 | AL354718.1_ENSG00000268578                              |
| 9 | 66455479 | 66455964 | KD2-H4K8ac_peak_28774 | 13.2712  |                                                         |
| 9 | 66456220 | 66456630 | KD2-H4K8ac_peak_28775 | 9.24683  | RP11-262H14.1_ENSG00000238113                           |
| 9 | 66456869 | 66458500 | KD2-H4K8ac_peak_28776 | 25.13881 | RP11-262H14.1_ENSG00000238113;RNA5SP283_ENSG00000202474 |
| 9 | 66493060 | 66494130 | KD2-H4K8ac_peak_28777 | 18.30228 | RP11-262H14.5_ENSG00000229422                           |
| 9 | 66519792 | 66520076 | KD2-H4K8ac_peak_28778 | 11.44756 | RP11-262H14.7_ENSG00000227582                           |
| 9 | 66520332 | 66520845 | KD2-H4K8ac_peak_28779 | 16.49944 | RP11-262H14.7_ENSG00000227582                           |
| 9 | 67790593 | 67790858 | KD2-H4K8ac_peak_28780 | 17.14886 | RP11-12A20.6_ENSG00000233172                            |
| 9 | 68412908 | 68413282 | KD2-H4K8ac_peak_28781 | 6.89636  | LINC00537_ENSG00000232815                               |
| 9 | 68413552 | 68413921 | KD2-H4K8ac_peak_28782 | 6.14438  | LINC00537_ENSG00000232815                               |
| 9 | 68455532 | 68456133 | KD2-H4K8ac_peak_28783 | 21.0207  | RP11-764K9.4_ENSG00000215548                            |
| 9 | 68726093 | 68726328 | KD2-H4K8ac_peak_28784 | 17.14886 | RP11-391M20.1_ENSG00000229789                           |
| 9 | 69065124 | 69065515 | KD2-H4K8ac_peak_28785 | 11.05407 | RP11-87H9.2_ENSG00000233961                             |
| 9 | 71394314 | 71394780 | KD2-H4K8ac_peak_28786 | 10.96455 | FAM122A_ENSG00000187866                                 |
| 9 | 71735703 | 71736115 | KD2-H4K8ac_peak_28787 | 8.5781   | TJP2_ENSG00000119139                                    |
| 9 | 71736490 | 71736817 | KD2-H4K8ac_peak_28788 | 4.77079  | TJP2_ENSG00000119139                                    |
| 9 | 71788825 | 71789253 | KD2-H4K8ac_peak_28789 | 10.19949 |                                                         |
| 9 | 72287341 | 72287652 | KD2-H4K8ac_peak_28790 | 10.46264 | APBA1_ENSG00000107282;RP11-109D9.4_ENSG00000261447      |
| 9 | 72374244 | 72374861 | KD2-H4K8ac_peak_28791 | 10.05606 | PTAR1_ENSG00000188647                                   |
| 9 | 72627979 | 72628389 | KD2-H4K8ac_peak_28792 | 9.68448  |                                                         |
| 9 | 72873398 | 72873599 | KD2-H4K8ac_peak_28793 | 11.89502 | SMC5-AS1_ENSG00000268364;SMC5_ENSG00000198887           |
| 9 | 72873999 | 72874279 | KD2-H4K8ac_peak_28794 | 11.22681 | SMC5-AS1_ENSG00000268364;SMC5_ENSG00000198887           |

|   |          |          |                       |          |                                                      |
|---|----------|----------|-----------------------|----------|------------------------------------------------------|
| 9 | 73033559 | 73034982 | KD2-H4K8ac_peak_28795 | 7.76329  |                                                      |
| 9 | 73035437 | 73035664 | KD2-H4K8ac_peak_28796 | 4.33139  |                                                      |
| 9 | 73035971 | 73036470 | KD2-H4K8ac_peak_28797 | 8.83582  |                                                      |
| 9 | 74979495 | 74980011 | KD2-H4K8ac_peak_28798 | 11.22681 | ZFAND5_ENSG00000107372                               |
| 9 | 74980465 | 74981000 | KD2-H4K8ac_peak_28799 | 10.29344 | ZFAND5_ENSG00000107372                               |
| 9 | 76947542 | 76947774 | KD2-H4K8ac_peak_28800 | 5.25071  |                                                      |
| 9 | 77567341 | 77567870 | KD2-H4K8ac_peak_28801 | 33.32474 | C9orf40_ENSG00000135045;RP11-197P3.4_ENSG00000203321 |
| 9 | 77642904 | 77643234 | KD2-H4K8ac_peak_28802 | 10.72313 | C9orf41_ENSG00000156017                              |
| 9 | 77643805 | 77644105 | KD2-H4K8ac_peak_28803 | 7.79558  | C9orf41_ENSG00000156017                              |
| 9 | 77702725 | 77703152 | KD2-H4K8ac_peak_28804 | 17.17257 | NMRK1_ENSG00000106733;OSTF1_ENSG00000134996          |
| 9 | 77703460 | 77703682 | KD2-H4K8ac_peak_28805 | 10.96455 | NMRK1_ENSG00000106733;OSTF1_ENSG00000134996          |
| 9 | 79008890 | 79009299 | KD2-H4K8ac_peak_28806 | 6.66692  | RFK_ENSG00000135002                                  |
| 9 | 79792538 | 79792787 | KD2-H4K8ac_peak_28807 | 8.88082  | VPS13A-AS1_ENSG00000232998;VPS13A_ENSG00000197969    |
| 9 | 80366714 | 80366991 | KD2-H4K8ac_peak_28808 | 4.59928  |                                                      |
| 9 | 80645446 | 80645688 | KD2-H4K8ac_peak_28809 | 6.8713   | GNAQ_ENSG00000156052                                 |
| 9 | 80645885 | 80646630 | KD2-H4K8ac_peak_28810 | 10.43145 | GNAQ_ENSG00000156052                                 |
| 9 | 80647018 | 80647446 | KD2-H4K8ac_peak_28811 | 7.36799  | GNAQ_ENSG00000156052                                 |
| 9 | 80850459 | 80850833 | KD2-H4K8ac_peak_28812 | 7.40314  | CEP78_ENSG00000148019                                |
| 9 | 80851072 | 80851298 | KD2-H4K8ac_peak_28813 | 10.44656 | CEP78_ENSG00000148019                                |
| 9 | 80912142 | 80912469 | KD2-H4K8ac_peak_28814 | 5.75757  | PSAT1_ENSG00000135069                                |
| 9 | 80922808 | 80923010 | KD2-H4K8ac_peak_28815 | 3.75035  |                                                      |
| 9 | 81157632 | 81157840 | KD2-H4K8ac_peak_28816 | 4.01115  |                                                      |
| 9 | 81472954 | 81473313 | KD2-H4K8ac_peak_28817 | 9.08816  |                                                      |
| 9 | 81949125 | 81949359 | KD2-H4K8ac_peak_28818 | 5.14125  |                                                      |
| 9 | 82185328 | 82186104 | KD2-H4K8ac_peak_28819 | 12.06346 | TLE4_ENSG00000106829                                 |
| 9 | 82187475 | 82188554 | KD2-H4K8ac_peak_28820 | 12.46522 | TLE4_ENSG00000106829                                 |
| 9 | 82846594 | 82848089 | KD2-H4K8ac_peak_28821 | 8.30974  |                                                      |
| 9 | 83879184 | 83879389 | KD2-H4K8ac_peak_28822 | 9.59147  |                                                      |
| 9 | 83933610 | 83933803 | KD2-H4K8ac_peak_28823 | 5.45396  |                                                      |
| 9 | 84011734 | 84012013 | KD2-H4K8ac_peak_28824 | 4.98072  |                                                      |
| 9 | 84302222 | 84303474 | KD2-H4K8ac_peak_28825 | 8.58069  | TLE1_ENSG00000196781                                 |
| 9 | 85104315 | 85104565 | KD2-H4K8ac_peak_28826 | 7.27716  |                                                      |
| 9 | 85215453 | 85216229 | KD2-H4K8ac_peak_28827 | 20.91724 |                                                      |
| 9 | 85508805 | 85509370 | KD2-H4K8ac_peak_28828 | 8.1233   |                                                      |
| 9 | 85677433 | 85677973 | KD2-H4K8ac_peak_28829 | 6.25869  | RASEF_ENSG00000165105                                |
| 9 | 85921279 | 85921473 | KD2-H4K8ac_peak_28830 | 5.57044  |                                                      |
| 9 | 85999162 | 85999377 | KD2-H4K8ac_peak_28831 | 4.37708  |                                                      |
| 9 | 86040204 | 86040464 | KD2-H4K8ac_peak_28832 | 7.12754  |                                                      |
| 9 | 86062389 | 86062582 | KD2-H4K8ac_peak_28833 | 7.36933  |                                                      |
| 9 | 86153430 | 86153629 | KD2-H4K8ac_peak_28834 | 8.28234  | FRMD3_ENSG00000172159                                |
| 9 | 86237779 | 86238587 | KD2-H4K8ac_peak_28835 | 15.61313 | IDNK_ENSG00000148057                                 |
| 9 | 86322032 | 86322277 | KD2-H4K8ac_peak_28836 | 7.12754  | UBQLN1_ENSG00000135018;RP11-522I20.3_ENSG00000254473 |
| 9 | 86322473 | 86323095 | KD2-H4K8ac_peak_28837 | 9.20193  | UBQLN1_ENSG00000135018;RP11-522I20.3_ENSG00000254473 |
| 9 | 86323378 | 86323651 | KD2-H4K8ac_peak_28838 | 11.89502 | UBQLN1_ENSG00000135018;RP11-522I20.3_ENSG00000254473 |
| 9 | 86432250 | 86432616 | KD2-H4K8ac_peak_28839 | 11.89502 |                                                      |
| 9 | 86432937 | 86433150 | KD2-H4K8ac_peak_28840 | 9.95119  |                                                      |

|   |          |          |                       |          |                                                   |
|---|----------|----------|-----------------------|----------|---------------------------------------------------|
| 9 | 86535720 | 86536239 | KD2-H4K8ac_peak_28841 | 6.40297  | KIF27_ENSG00000165115                             |
| 9 | 86537083 | 86537285 | KD2-H4K8ac_peak_28842 | 5.57044  | KIF27_ENSG00000165115                             |
| 9 | 86571103 | 86571531 | KD2-H4K8ac_peak_28843 | 9.41619  | C9orf64_ENSG00000165118                           |
| 9 | 86594505 | 86595126 | KD2-H4K8ac_peak_28844 | 18.29344 | HNRNPK_ENSG00000165119;RMI1_ENSG00000178966       |
| 9 | 86595704 | 86596097 | KD2-H4K8ac_peak_28845 | 19.55721 | HNRNPK_ENSG00000165119;RMI1_ENSG00000178966       |
| 9 | 86986894 | 86987318 | KD2-H4K8ac_peak_28846 | 6.90458  |                                                   |
| 9 | 87703620 | 87703854 | KD2-H4K8ac_peak_28847 | 9.11031  |                                                   |
| 9 | 88419919 | 88420669 | KD2-H4K8ac_peak_28848 | 17.27647 |                                                   |
| 9 | 88556200 | 88556599 | KD2-H4K8ac_peak_28849 | 7.07117  | NAA35_ENSG00000135040                             |
| 9 | 88713802 | 88714076 | KD2-H4K8ac_peak_28850 | 6.60096  |                                                   |
| 9 | 88714538 | 88715166 | KD2-H4K8ac_peak_28851 | 12.00597 | GOLM1_ENSG00000135052                             |
| 9 | 88896695 | 88897387 | KD2-H4K8ac_peak_28852 | 8.16906  | ISCA1_ENSG00000135070                             |
| 9 | 88968894 | 88969297 | KD2-H4K8ac_peak_28853 | 14.45402 | ZCCHC6_ENSG00000083223                            |
| 9 | 88969552 | 88969931 | KD2-H4K8ac_peak_28854 | 13.36684 | ZCCHC6_ENSG00000083223                            |
| 9 | 89563709 | 89564001 | KD2-H4K8ac_peak_28855 | 3.75035  | RP11-276H19.1_ENSG00000226237                     |
| 9 | 89622462 | 89622777 | KD2-H4K8ac_peak_28856 | 6.40683  |                                                   |
| 9 | 89763349 | 89763913 | KD2-H4K8ac_peak_28857 | 8.23274  | C9orf170_ENSG00000204446                          |
| 9 | 90112820 | 90113523 | KD2-H4K8ac_peak_28858 | 11.92978 | DAPK1_ENSG00000196730                             |
| 9 | 90220861 | 90221065 | KD2-H4K8ac_peak_28859 | 6.14257  |                                                   |
| 9 | 90235941 | 90236342 | KD2-H4K8ac_peak_28860 | 9.1707   |                                                   |
| 9 | 90340627 | 90341824 | KD2-H4K8ac_peak_28861 | 8.55271  | CTSL_ENSG00000135047                              |
| 9 | 90589062 | 90589664 | KD2-H4K8ac_peak_28862 | 7.59643  | CDK20_ENSG00000156345                             |
| 9 | 90690960 | 90691626 | KD2-H4K8ac_peak_28863 | 10.7186  |                                                   |
| 9 | 90707927 | 90708205 | KD2-H4K8ac_peak_28864 | 7.96322  |                                                   |
| 9 | 91002275 | 91004168 | KD2-H4K8ac_peak_28865 | 31.40306 | SPIN1_ENSG00000106723                             |
| 9 | 91148903 | 91149290 | KD2-H4K8ac_peak_28866 | 9.11031  | NXNL2_ENSG00000130045                             |
| 9 | 91150167 | 91150487 | KD2-H4K8ac_peak_28867 | 8.5781   | NXNL2_ENSG00000130045                             |
| 9 | 91354634 | 91355142 | KD2-H4K8ac_peak_28868 | 7.01494  |                                                   |
| 9 | 91368380 | 91368576 | KD2-H4K8ac_peak_28869 | 5.61067  |                                                   |
| 9 | 91606458 | 91606809 | KD2-H4K8ac_peak_28870 | 6.40683  | C9orf47_ENSG00000186354;S1PR3_ENSG00000213694     |
| 9 | 91625458 | 91625684 | KD2-H4K8ac_peak_28871 | 4.77079  | RP11-82L18.4_ENSG00000231632                      |
| 9 | 91792818 | 91793719 | KD2-H4K8ac_peak_28872 | 6.40297  | SHC3_ENSG00000148082                              |
| 9 | 91794650 | 91795019 | KD2-H4K8ac_peak_28873 | 4.67342  | SHC3_ENSG00000148082                              |
| 9 | 91897320 | 91897728 | KD2-H4K8ac_peak_28874 | 5.14125  |                                                   |
| 9 | 91924773 | 91925658 | KD2-H4K8ac_peak_28875 | 17.8868  | CKS2_ENSG00000123975                              |
| 9 | 91932299 | 91933659 | KD2-H4K8ac_peak_28876 | 18.37277 | SECISBP2_ENSG00000187742                          |
| 9 | 92020173 | 92020474 | KD2-H4K8ac_peak_28877 | 5.73839  |                                                   |
| 9 | 92112354 | 92112963 | KD2-H4K8ac_peak_28878 | 12.06346 | SEMA4D_ENSG00000187764;AL590233.1_ENSG00000264913 |
| 9 | 92113311 | 92113549 | KD2-H4K8ac_peak_28879 | 7.36799  | SEMA4D_ENSG00000187764;AL590233.1_ENSG00000264913 |
| 9 | 92218986 | 92219354 | KD2-H4K8ac_peak_28880 | 7.69287  | GADD45G_ENSG00000130222                           |
| 9 | 92277230 | 92278047 | KD2-H4K8ac_peak_28881 | 8.53092  |                                                   |
| 9 | 92289462 | 92291214 | KD2-H4K8ac_peak_28882 | 15.81711 |                                                   |
| 9 | 92292478 | 92292804 | KD2-H4K8ac_peak_28883 | 5.405    |                                                   |
| 9 | 92293112 | 92294056 | KD2-H4K8ac_peak_28884 | 8.36514  |                                                   |
| 9 | 92294755 | 92294968 | KD2-H4K8ac_peak_28885 | 6.69844  |                                                   |
| 9 | 92299981 | 92300189 | KD2-H4K8ac_peak_28886 | 4.71229  |                                                   |



|   |          |          |                       |          |                           |
|---|----------|----------|-----------------------|----------|---------------------------|
| 9 | 92447779 | 92448259 | KD2-H4K8ac_peak_28887 | 13.44374 |                           |
| 9 | 92451288 | 92452211 | KD2-H4K8ac_peak_28888 | 6.98517  |                           |
| 9 | 92479189 | 92479397 | KD2-H4K8ac_peak_28889 | 5.9696   |                           |
| 9 | 92479655 | 92479872 | KD2-H4K8ac_peak_28890 | 7.76335  |                           |
| 9 | 92516117 | 92516351 | KD2-H4K8ac_peak_28891 | 3.72305  |                           |
| 9 | 92692225 | 92692600 | KD2-H4K8ac_peak_28892 | 5.57044  |                           |
| 9 | 92716366 | 92716965 | KD2-H4K8ac_peak_28893 | 3.90565  |                           |
| 9 | 92762183 | 92762414 | KD2-H4K8ac_peak_28894 | 7.40314  |                           |
| 9 | 93064104 | 93064354 | KD2-H4K8ac_peak_28895 | 7.51935  |                           |
| 9 | 93068173 | 93068634 | KD2-H4K8ac_peak_28896 | 5.82799  |                           |
| 9 | 93069791 | 93070134 | KD2-H4K8ac_peak_28897 | 6.91644  |                           |
| 9 | 93070943 | 93071189 | KD2-H4K8ac_peak_28898 | 5.29555  |                           |
| 9 | 93563511 | 93564567 | KD2-H4K8ac_peak_28899 | 8.36432  | SYK_ENSG00000165025       |
| 9 | 93567499 | 93567746 | KD2-H4K8ac_peak_28900 | 4.04247  |                           |
| 9 | 93798885 | 93799546 | KD2-H4K8ac_peak_28901 | 10.7186  |                           |
| 9 | 93800089 | 93800697 | KD2-H4K8ac_peak_28902 | 3.86308  |                           |
| 9 | 93955448 | 93955815 | KD2-H4K8ac_peak_28903 | 10.0692  |                           |
| 9 | 93956888 | 93957081 | KD2-H4K8ac_peak_28904 | 6.90458  |                           |
| 9 | 94123749 | 94124629 | KD2-H4K8ac_peak_28905 | 13.73635 | AUH_ENSG00000148090       |
| 9 | 94183376 | 94183841 | KD2-H4K8ac_peak_28906 | 8.59579  |                           |
| 9 | 94186466 | 94186699 | KD2-H4K8ac_peak_28907 | 5.30799  | NFIL3_ENSG00000165030     |
| 9 | 94499131 | 94499342 | KD2-H4K8ac_peak_28908 | 4.52326  |                           |
| 9 | 94587249 | 94588264 | KD2-H4K8ac_peak_28909 | 5.57044  |                           |
| 9 | 94606256 | 94606781 | KD2-H4K8ac_peak_28910 | 10.21366 |                           |
| 9 | 94619380 | 94619887 | KD2-H4K8ac_peak_28911 | 5.88845  |                           |
| 9 | 94620383 | 94620577 | KD2-H4K8ac_peak_28912 | 4.42765  |                           |
| 9 | 94657876 | 94658309 | KD2-H4K8ac_peak_28913 | 10.2519  |                           |
| 9 | 94658693 | 94658915 | KD2-H4K8ac_peak_28914 | 4.68932  |                           |
| 9 | 94661630 | 94662166 | KD2-H4K8ac_peak_28915 | 5.75452  |                           |
| 9 | 94662561 | 94662943 | KD2-H4K8ac_peak_28916 | 6.90231  |                           |
| 9 | 94697495 | 94698002 | KD2-H4K8ac_peak_28917 | 12.08081 |                           |
| 9 | 94710471 | 94712430 | KD2-H4K8ac_peak_28918 | 10.46264 | ROR2_ENSG00000169071      |
| 9 | 94712641 | 94713053 | KD2-H4K8ac_peak_28919 | 11.89502 | ROR2_ENSG00000169071      |
| 9 | 94717260 | 94717653 | KD2-H4K8ac_peak_28920 | 9.72244  |                           |
| 9 | 94753758 | 94753967 | KD2-H4K8ac_peak_28921 | 6.0073   |                           |
| 9 | 94877235 | 94877653 | KD2-H4K8ac_peak_28922 | 12.3187  | SPTLC1_ENSG00000090054    |
| 9 | 94903622 | 94903925 | KD2-H4K8ac_peak_28923 | 4.06758  | LINC00475_ENSG00000225511 |
| 9 | 94909837 | 94910265 | KD2-H4K8ac_peak_28924 | 6.31143  |                           |
| 9 | 94916155 | 94916398 | KD2-H4K8ac_peak_28925 | 4.42765  |                           |
| 9 | 95102216 | 95102453 | KD2-H4K8ac_peak_28926 | 6.4095   |                           |
| 9 | 95121283 | 95121610 | KD2-H4K8ac_peak_28927 | 11.49574 |                           |
| 9 | 95188776 | 95189226 | KD2-H4K8ac_peak_28928 | 5.19569  |                           |
| 9 | 95372087 | 95372486 | KD2-H4K8ac_peak_28929 | 7.70289  |                           |
| 9 | 95412660 | 95413014 | KD2-H4K8ac_peak_28930 | 4.8888   |                           |
| 9 | 95432665 | 95433009 | KD2-H4K8ac_peak_28931 | 12.46522 | IPPK_ENSG00000127080      |
| 9 | 95503132 | 95503330 | KD2-H4K8ac_peak_28932 | 5.57044  |                           |

|   |          |          |                       |          |                                                       |
|---|----------|----------|-----------------------|----------|-------------------------------------------------------|
| 9 | 95526722 | 95527077 | KD2-H4K8ac_peak_28933 | 9.90914  | BICD2_ENSG00000185963                                 |
| 9 | 95527436 | 95527772 | KD2-H4K8ac_peak_28934 | 33.50961 | BICD2_ENSG00000185963                                 |
| 9 | 95709742 | 95709987 | KD2-H4K8ac_peak_28935 | 6.66359  | FGD3_ENSG00000127084                                  |
| 9 | 95820883 | 95821215 | KD2-H4K8ac_peak_28936 | 4.77079  | SUSD3_ENSG00000157303                                 |
| 9 | 95834125 | 95834616 | KD2-H4K8ac_peak_28937 | 5.9696   |                                                       |
| 9 | 95855940 | 95856140 | KD2-H4K8ac_peak_28938 | 6.33462  |                                                       |
| 9 | 95857235 | 95857831 | KD2-H4K8ac_peak_28939 | 15.38498 | RP11-274J16.5_ENSG00000223446;C9orf89_ENSG00000165233 |
| 9 | 95881773 | 95882302 | KD2-H4K8ac_peak_28940 | 13.70753 |                                                       |
| 9 | 95882812 | 95883047 | KD2-H4K8ac_peak_28941 | 5.61377  |                                                       |
| 9 | 95889290 | 95889740 | KD2-H4K8ac_peak_28942 | 5.32933  |                                                       |
| 9 | 95895500 | 95897056 | KD2-H4K8ac_peak_28943 | 12.70308 | NINJ1_ENSG00000131669                                 |
| 9 | 95946571 | 95946927 | KD2-H4K8ac_peak_28944 | 9.65086  | WNK2_ENSG00000165238                                  |
| 9 | 95963463 | 95964546 | KD2-H4K8ac_peak_28945 | 10.30951 |                                                       |
| 9 | 95967595 | 95967829 | KD2-H4K8ac_peak_28946 | 7.76329  |                                                       |
| 9 | 95968099 | 95968308 | KD2-H4K8ac_peak_28947 | 8.5092   |                                                       |
| 9 | 95978764 | 95978995 | KD2-H4K8ac_peak_28948 | 8.78496  |                                                       |
| 9 | 95993609 | 95993840 | KD2-H4K8ac_peak_28949 | 10.46264 |                                                       |
| 9 | 96061379 | 96061592 | KD2-H4K8ac_peak_28950 | 4.77079  |                                                       |
| 9 | 96107923 | 96109034 | KD2-H4K8ac_peak_28951 | 11.05467 | C9orf129_ENSG00000204352                              |
| 9 | 96213490 | 96213790 | KD2-H4K8ac_peak_28952 | 10.19949 | FAM120A_ENSG00000048828                               |
| 9 | 96214239 | 96214933 | KD2-H4K8ac_peak_28953 | 7.47462  | FAM120AOS_ENSG00000188938;FAM120A_ENSG00000048828     |
| 9 | 96329065 | 96330092 | KD2-H4K8ac_peak_28954 | 6.65673  | AL353629.1_ENSG00000263875                            |
| 9 | 96337892 | 96338741 | KD2-H4K8ac_peak_28955 | 8.82366  | PHF2_ENSG00000197724                                  |
| 9 | 96339353 | 96339852 | KD2-H4K8ac_peak_28956 | 9.1707   | PHF2_ENSG00000197724                                  |
| 9 | 96589917 | 96590475 | KD2-H4K8ac_peak_28957 | 14.98671 |                                                       |
| 9 | 96792324 | 96793435 | KD2-H4K8ac_peak_28958 | 21.11201 | PTPDC1_ENSG00000158079                                |
| 9 | 96927811 | 96928137 | KD2-H4K8ac_peak_28959 | 6.83936  | RP11-2B6.3_ENSG00000269946                            |
| 9 | 96928593 | 96928903 | KD2-H4K8ac_peak_28960 | 14.17488 | RP11-2B6.3_ENSG00000269946                            |
| 9 | 97020763 | 97021301 | KD2-H4K8ac_peak_28961 | 23.22963 | ZNF169_ENSG00000175787                                |
| 9 | 97021656 | 97022022 | KD2-H4K8ac_peak_28962 | 8.85813  | ZNF169_ENSG00000175787                                |
| 9 | 97365576 | 97365967 | KD2-H4K8ac_peak_28963 | 3.70718  |                                                       |
| 9 | 97366930 | 97367139 | KD2-H4K8ac_peak_28964 | 5.54647  |                                                       |
| 9 | 97371322 | 97372331 | KD2-H4K8ac_peak_28965 | 14.59844 |                                                       |
| 9 | 97373032 | 97373520 | KD2-H4K8ac_peak_28966 | 11.79585 |                                                       |
| 9 | 97373901 | 97374095 | KD2-H4K8ac_peak_28967 | 5.30799  |                                                       |
| 9 | 97385489 | 97385952 | KD2-H4K8ac_peak_28968 | 8.02571  |                                                       |
| 9 | 97431426 | 97431639 | KD2-H4K8ac_peak_28969 | 5.88845  |                                                       |
| 9 | 97442855 | 97443530 | KD2-H4K8ac_peak_28970 | 4.56666  |                                                       |
| 9 | 97455836 | 97456049 | KD2-H4K8ac_peak_28971 | 4.76709  |                                                       |
| 9 | 97466673 | 97466874 | KD2-H4K8ac_peak_28972 | 5.08628  |                                                       |
| 9 | 97469018 | 97469429 | KD2-H4K8ac_peak_28973 | 6.50927  |                                                       |
| 9 | 97488482 | 97488753 | KD2-H4K8ac_peak_28974 | 11.86082 | C9orf3_ENSG00000148120                                |
| 9 | 97545626 | 97545850 | KD2-H4K8ac_peak_28975 | 7.27716  |                                                       |
| 9 | 97625856 | 97626267 | KD2-H4K8ac_peak_28976 | 5.88845  |                                                       |
| 9 | 97630581 | 97630863 | KD2-H4K8ac_peak_28977 | 5.88845  |                                                       |
| 9 | 97631304 | 97631499 | KD2-H4K8ac_peak_28978 | 6.25869  |                                                       |

|   |          |          |                       |          |                                                   |
|---|----------|----------|-----------------------|----------|---------------------------------------------------|
| 9 | 97632333 | 97632607 | KD2-H4K8ac_peak_28979 | 13.9234  |                                                   |
| 9 | 97635070 | 97635281 | KD2-H4K8ac_peak_28980 | 6.40683  |                                                   |
| 9 | 97668893 | 97669287 | KD2-H4K8ac_peak_28981 | 8.12706  |                                                   |
| 9 | 97669956 | 97670523 | KD2-H4K8ac_peak_28982 | 8.1235   |                                                   |
| 9 | 97689546 | 97690181 | KD2-H4K8ac_peak_28983 | 14.89521 |                                                   |
| 9 | 97690458 | 97690756 | KD2-H4K8ac_peak_28984 | 7.36799  |                                                   |
| 9 | 97766557 | 97767023 | KD2-H4K8ac_peak_28985 | 18.94636 |                                                   |
| 9 | 97767341 | 97767818 | KD2-H4K8ac_peak_28986 | 4.44527  |                                                   |
| 9 | 97818634 | 97818842 | KD2-H4K8ac_peak_28987 | 4.211    |                                                   |
| 9 | 97851242 | 97851461 | KD2-H4K8ac_peak_28988 | 5.88845  |                                                   |
| 9 | 97853169 | 97853837 | KD2-H4K8ac_peak_28989 | 8.10216  |                                                   |
| 9 | 97854479 | 97855035 | KD2-H4K8ac_peak_28990 | 10.99466 |                                                   |
| 9 | 97857767 | 97858010 | KD2-H4K8ac_peak_28991 | 7.07512  |                                                   |
| 9 | 97858690 | 97858971 | KD2-H4K8ac_peak_28992 | 15.22643 |                                                   |
| 9 | 97860764 | 97860967 | KD2-H4K8ac_peak_28993 | 5.77265  |                                                   |
| 9 | 97865837 | 97866267 | KD2-H4K8ac_peak_28994 | 17.55491 |                                                   |
| 9 | 97889683 | 97889925 | KD2-H4K8ac_peak_28995 | 9.36516  |                                                   |
| 9 | 97891542 | 97891992 | KD2-H4K8ac_peak_28996 | 5.20908  |                                                   |
| 9 | 97893499 | 97893746 | KD2-H4K8ac_peak_28997 | 7.08474  |                                                   |
| 9 | 97894232 | 97894726 | KD2-H4K8ac_peak_28998 | 8.37231  |                                                   |
| 9 | 97896853 | 97897183 | KD2-H4K8ac_peak_28999 | 5.30799  |                                                   |
| 9 | 97900176 | 97900859 | KD2-H4K8ac_peak_29000 | 6.99815  |                                                   |
| 9 | 98029515 | 98029732 | KD2-H4K8ac_peak_29001 | 7.27716  |                                                   |
| 9 | 98077516 | 98077716 | KD2-H4K8ac_peak_29002 | 9.76452  |                                                   |
| 9 | 98268263 | 98268701 | KD2-H4K8ac_peak_29003 | 15.61313 | RP11-435O5.5_ENSG00000271155                      |
| 9 | 98268894 | 98269491 | KD2-H4K8ac_peak_29004 | 13.50024 | RP11-435O5.5_ENSG00000271155                      |
| 9 | 98278301 | 98278794 | KD2-H4K8ac_peak_29005 | 8.23274  | PTCH1_ENSG00000185920                             |
| 9 | 98279176 | 98279591 | KD2-H4K8ac_peak_29006 | 8.74596  | PTCH1_ENSG00000185920                             |
| 9 | 98333199 | 98333400 | KD2-H4K8ac_peak_29007 | 8.1718   |                                                   |
| 9 | 98335063 | 98335286 | KD2-H4K8ac_peak_29008 | 4.77079  |                                                   |
| 9 | 98343827 | 98344459 | KD2-H4K8ac_peak_29009 | 10.16972 |                                                   |
| 9 | 98516119 | 98516534 | KD2-H4K8ac_peak_29010 | 4.42765  |                                                   |
| 9 | 98637961 | 98638240 | KD2-H4K8ac_peak_29011 | 12.11734 | LINC00476_ENSG00000175611;ERCC6L2_ENSG00000182150 |
| 9 | 98783455 | 98783921 | KD2-H4K8ac_peak_29012 | 6.66359  |                                                   |
| 9 | 98784156 | 98784490 | KD2-H4K8ac_peak_29013 | 11.79585 |                                                   |
| 9 | 98810068 | 98810281 | KD2-H4K8ac_peak_29014 | 5.29352  |                                                   |
| 9 | 98931670 | 98932091 | KD2-H4K8ac_peak_29015 | 4.59928  |                                                   |
| 9 | 98978600 | 98978863 | KD2-H4K8ac_peak_29016 | 7.6718   |                                                   |
| 9 | 98980269 | 98980472 | KD2-H4K8ac_peak_29017 | 8.17902  |                                                   |
| 9 | 99145577 | 99146165 | KD2-H4K8ac_peak_29018 | 7.47462  | SLC35D2_ENSG00000130958                           |
| 9 | 99179887 | 99180352 | KD2-H4K8ac_peak_29019 | 6.45083  | ZNF367_ENSG00000165244                            |
| 9 | 99181198 | 99181641 | KD2-H4K8ac_peak_29020 | 13.80019 | ZNF367_ENSG00000165244                            |
| 9 | 99329343 | 99329834 | KD2-H4K8ac_peak_29021 | 8.55271  |                                                   |
| 9 | 99417115 | 99417408 | KD2-H4K8ac_peak_29022 | 7.07117  | AAED1_ENSG00000158122                             |
| 9 | 99417742 | 99417969 | KD2-H4K8ac_peak_29023 | 8.1718   | AAED1_ENSG00000158122                             |
| 9 | 99540013 | 99540379 | KD2-H4K8ac_peak_29024 | 19.6416  | ZNF510_ENSG00000081386                            |

|   |           |          |                       |          |                                                                                                                   |
|---|-----------|----------|-----------------------|----------|-------------------------------------------------------------------------------------------------------------------|
| 9 | 99616405  | 99616692 | KD2-H4K8ac_peak_29025 | 7.76329  |                                                                                                                   |
| 9 | 99617332  | 99617654 | KD2-H4K8ac_peak_29026 | 6.47635  |                                                                                                                   |
| 9 | 99775370  | 99775862 | KD2-H4K8ac_peak_29027 | 11.66477 | HIATL2_ENSG00000196312                                                                                            |
| 9 | 99776181  | 99776490 | KD2-H4K8ac_peak_29028 | 7.13615  | HIATL2_ENSG00000196312                                                                                            |
| 9 | 99999678  | 1E+08    | KD2-H4K8ac_peak_29029 | 7.76329  | RP11-498P14.5_ENSG00000203279;RP11-23J9.5_ENSG00000254876;CCDC180_ENSG00000197816;RP11-23J9.4_ENSG00000255036;RP1 |
| 9 | 100174379 | 1E+08    | KD2-H4K8ac_peak_29030 | 10.53377 | TDRD7_ENSG00000196116                                                                                             |
| 9 | 100242254 | 1E+08    | KD2-H4K8ac_peak_29031 | 5.25071  |                                                                                                                   |
| 9 | 100263982 | 1E+08    | KD2-H4K8ac_peak_29032 | 10.96455 | TMOD1_ENSG00000136842                                                                                             |
| 9 | 100264715 | 1E+08    | KD2-H4K8ac_peak_29033 | 15.5861  |                                                                                                                   |
| 9 | 100266454 | 1E+08    | KD2-H4K8ac_peak_29034 | 6.90231  |                                                                                                                   |
| 9 | 100267513 | 1E+08    | KD2-H4K8ac_peak_29035 | 10.05606 |                                                                                                                   |
| 9 | 100394621 | 1E+08    | KD2-H4K8ac_peak_29036 | 6.40683  |                                                                                                                   |
| 9 | 100395320 | 1E+08    | KD2-H4K8ac_peak_29037 | 5.14125  | TSTD2_ENSG00000136925;NCBP1_ENSG00000136937                                                                       |
| 9 | 100396199 | 1E+08    | KD2-H4K8ac_peak_29038 | 9.89126  | TSTD2_ENSG00000136925;NCBP1_ENSG00000136937                                                                       |
| 9 | 100459268 | 1E+08    | KD2-H4K8ac_peak_29039 | 8.55271  | XPA_ENSG00000136936                                                                                               |
| 9 | 100503532 | 1.01E+08 | KD2-H4K8ac_peak_29040 | 12.06346 |                                                                                                                   |
| 9 | 100565940 | 1.01E+08 | KD2-H4K8ac_peak_29041 | 8.2413   |                                                                                                                   |
| 9 | 100684574 | 1.01E+08 | KD2-H4K8ac_peak_29042 | 13.80019 | C9orf156_ENSG00000136932                                                                                          |
| 9 | 100744850 | 1.01E+08 | KD2-H4K8ac_peak_29043 | 20.93354 | ANP32B_ENSG00000136938                                                                                            |
| 9 | 100745655 | 1.01E+08 | KD2-H4K8ac_peak_29044 | 22.0091  | ANP32B_ENSG00000136938                                                                                            |
| 9 | 100818071 | 1.01E+08 | KD2-H4K8ac_peak_29045 | 5.57044  | NANS_ENSG00000095380                                                                                              |
| 9 | 100819061 | 1.01E+08 | KD2-H4K8ac_peak_29046 | 9.89126  | NANS_ENSG00000095380                                                                                              |
| 9 | 100881333 | 1.01E+08 | KD2-H4K8ac_peak_29047 | 6.24114  | TRIM14_ENSG00000106785                                                                                            |
| 9 | 100955054 | 1.01E+08 | KD2-H4K8ac_peak_29048 | 8.55271  | CORO2A_ENSG00000106789                                                                                            |
| 9 | 101018197 | 1.01E+08 | KD2-H4K8ac_peak_29049 | 7.50083  | TBC1D2_ENSG00000095383                                                                                            |
| 9 | 101558375 | 1.02E+08 | KD2-H4K8ac_peak_29050 | 9.08816  | ANKS6_ENSG00000165138                                                                                             |
| 9 | 101559020 | 1.02E+08 | KD2-H4K8ac_peak_29051 | 8.16906  | ANKS6_ENSG00000165138                                                                                             |
| 9 | 101867651 | 1.02E+08 | KD2-H4K8ac_peak_29052 | 5.72327  |                                                                                                                   |
| 9 | 101932783 | 1.02E+08 | KD2-H4K8ac_peak_29053 | 14.12659 |                                                                                                                   |
| 9 | 101947149 | 1.02E+08 | KD2-H4K8ac_peak_29054 | 8.23274  | RN7SL794P_ENSG00000240235                                                                                         |
| 9 | 101983771 | 1.02E+08 | KD2-H4K8ac_peak_29055 | 8.10216  | ALG2_ENSG00000119523;SEC61B_ENSG00000106803                                                                       |
| 9 | 102160822 | 1.02E+08 | KD2-H4K8ac_peak_29056 | 6.34383  |                                                                                                                   |
| 9 | 102162672 | 1.02E+08 | KD2-H4K8ac_peak_29057 | 8.55271  |                                                                                                                   |
| 9 | 102227109 | 1.02E+08 | KD2-H4K8ac_peak_29058 | 4.86324  |                                                                                                                   |
| 9 | 102235835 | 1.02E+08 | KD2-H4K8ac_peak_29059 | 8.1233   |                                                                                                                   |
| 9 | 102581824 | 1.03E+08 | KD2-H4K8ac_peak_29060 | 8.10216  | RP11-554F20.1_ENSG00000237461                                                                                     |
| 9 | 102668428 | 1.03E+08 | KD2-H4K8ac_peak_29061 | 11.30637 | RP11-60I3.5_ENSG00000255145;STX17_ENSG00000136874                                                                 |
| 9 | 102668990 | 1.03E+08 | KD2-H4K8ac_peak_29062 | 12.08081 | RP11-60I3.5_ENSG00000255145;STX17_ENSG00000136874                                                                 |
| 9 | 102860816 | 1.03E+08 | KD2-H4K8ac_peak_29063 | 6.05809  | ERP44_ENSG00000023318;INVS_ENSG00000119509                                                                        |
| 9 | 103114552 | 1.03E+08 | KD2-H4K8ac_peak_29064 | 18.5703  | TEX10_ENSG00000136891                                                                                             |
| 9 | 103115427 | 1.03E+08 | KD2-H4K8ac_peak_29065 | 10.21502 | TEX10_ENSG00000136891                                                                                             |
| 9 | 103173628 | 1.03E+08 | KD2-H4K8ac_peak_29066 | 5.08628  |                                                                                                                   |
| 9 | 103174963 | 1.03E+08 | KD2-H4K8ac_peak_29067 | 6.40683  |                                                                                                                   |
| 9 | 103188854 | 1.03E+08 | KD2-H4K8ac_peak_29068 | 10.05606 | MSANTD3_ENSG00000066697                                                                                           |
| 9 | 103189618 | 1.03E+08 | KD2-H4K8ac_peak_29069 | 13.80319 | MSANTD3_ENSG00000066697                                                                                           |
| 9 | 103360977 | 1.03E+08 | KD2-H4K8ac_peak_29070 | 6.25869  |                                                                                                                   |

|   |           |          |                       |          |                                                                                 |
|---|-----------|----------|-----------------------|----------|---------------------------------------------------------------------------------|
| 9 | 104160333 | 1.04E+08 | KD2-H4K8ac_peak_29071 | 6.40683  | MRPL50_ENSG00000136897;ZNF189_ENSG00000136870                                   |
| 9 | 104161246 | 1.04E+08 | KD2-H4K8ac_peak_29072 | 13.09607 | MRPL50_ENSG00000136897;ZNF189_ENSG00000136870                                   |
| 9 | 104211557 | 1.04E+08 | KD2-H4K8ac_peak_29073 | 6.25869  | RP11-490D19.11_ENSG00000270982                                                  |
| 9 | 104248378 | 1.04E+08 | KD2-H4K8ac_peak_29074 | 9.20193  |                                                                                 |
| 9 | 104295505 | 1.04E+08 | KD2-H4K8ac_peak_29075 | 9.95119  | TMEM246_ENSG00000165152;RNF20_ENSG00000155827                                   |
| 9 | 106856395 | 1.07E+08 | KD2-H4K8ac_peak_29076 | 4.211    | SMC2_ENSG00000136824                                                            |
| 9 | 107510250 | 1.08E+08 | KD2-H4K8ac_peak_29077 | 12.82393 | NIPSNAP3A_ENSG00000136783                                                       |
| 9 | 107526124 | 1.08E+08 | KD2-H4K8ac_peak_29078 | 10.77651 | NIPSNAP3B_ENSG00000165028                                                       |
| 9 | 107730596 | 1.08E+08 | KD2-H4K8ac_peak_29079 | 17.43705 |                                                                                 |
| 9 | 108006021 | 1.08E+08 | KD2-H4K8ac_peak_29080 | 12.06346 | SLC44A1_ENSG00000070214                                                         |
| 9 | 108159856 | 1.08E+08 | KD2-H4K8ac_peak_29081 | 8.02571  |                                                                                 |
| 9 | 108209800 | 1.08E+08 | KD2-H4K8ac_peak_29082 | 15.81711 | FSD1L_ENSG00000106701                                                           |
| 9 | 108210757 | 1.08E+08 | KD2-H4K8ac_peak_29083 | 6.54442  | FSD1L_ENSG00000106701                                                           |
| 9 | 108418288 | 1.08E+08 | KD2-H4K8ac_peak_29084 | 10.7186  |                                                                                 |
| 9 | 108740633 | 1.09E+08 | KD2-H4K8ac_peak_29085 | 7.13615  |                                                                                 |
| 9 | 108814590 | 1.09E+08 | KD2-H4K8ac_peak_29086 | 11.97761 |                                                                                 |
| 9 | 109384453 | 1.09E+08 | KD2-H4K8ac_peak_29087 | 9.15329  |                                                                                 |
| 9 | 109622500 | 1.1E+08  | KD2-H4K8ac_peak_29088 | 8.73935  |                                                                                 |
| 9 | 109624414 | 1.1E+08  | KD2-H4K8ac_peak_29089 | 10.05606 | ZNF462_ENSG00000148143                                                          |
| 9 | 109626516 | 1.1E+08  | KD2-H4K8ac_peak_29090 | 7.07512  |                                                                                 |
| 9 | 109641763 | 1.1E+08  | KD2-H4K8ac_peak_29091 | 6.56926  |                                                                                 |
| 9 | 110044610 | 1.1E+08  | KD2-H4K8ac_peak_29092 | 3.87414  | RAD23B_ENSG00000119318                                                          |
| 9 | 110045605 | 1.1E+08  | KD2-H4K8ac_peak_29093 | 18.33962 | RAD23B_ENSG00000119318                                                          |
| 9 | 110125960 | 1.1E+08  | KD2-H4K8ac_peak_29094 | 9.51625  |                                                                                 |
| 9 | 110187350 | 1.1E+08  | KD2-H4K8ac_peak_29095 | 9.95119  |                                                                                 |
| 9 | 111696828 | 1.12E+08 | KD2-H4K8ac_peak_29096 | 10.96455 | IKBKAP_ENSG00000070061;FAM206A_ENSG00000119328                                  |
| 9 | 111775162 | 1.12E+08 | KD2-H4K8ac_peak_29097 | 7.76104  | CTNNAL1_ENSG00000119326                                                         |
| 9 | 111881888 | 1.12E+08 | KD2-H4K8ac_peak_29098 | 10.02431 | TMEM245_ENSG00000106771                                                         |
| 9 | 111929163 | 1.12E+08 | KD2-H4K8ac_peak_29099 | 17.14886 | FRRS1L_ENSG00000260230                                                          |
| 9 | 112083195 | 1.12E+08 | KD2-H4K8ac_peak_29100 | 6.85103  | EPB41L4B_ENSG00000095203                                                        |
| 9 | 112810190 | 1.13E+08 | KD2-H4K8ac_peak_29101 | 6.40683  |                                                                                 |
| 9 | 112810965 | 1.13E+08 | KD2-H4K8ac_peak_29102 | 11.30637 |                                                                                 |
| 9 | 113017918 | 1.13E+08 | KD2-H4K8ac_peak_29103 | 10.19949 | TXN_ENSG00000136810                                                             |
| 9 | 113019736 | 1.13E+08 | KD2-H4K8ac_peak_29104 | 4.8888   | TXN_ENSG00000136810                                                             |
| 9 | 113799949 | 1.14E+08 | KD2-H4K8ac_peak_29105 | 11.2938  | LPAR1_ENSG00000198121                                                           |
| 9 | 114245447 | 1.14E+08 | KD2-H4K8ac_peak_29106 | 9.07715  | KIAA0368_ENSG00000136813                                                        |
| 9 | 114287156 | 1.14E+08 | KD2-H4K8ac_peak_29107 | 6.25869  | ZNF483_ENSG00000173258                                                          |
| 9 | 114361319 | 1.14E+08 | KD2-H4K8ac_peak_29108 | 5.54647  | PTGR1_ENSG00000106853                                                           |
| 9 | 114393765 | 1.14E+08 | KD2-H4K8ac_peak_29109 | 5.30799  | LRRC37A5P_ENSG00000204173;DNAJC25_ENSG00000059769;DNAJC25-GNG10_ENSG00000244115 |
| 9 | 114937088 | 1.15E+08 | KD2-H4K8ac_peak_29110 | 11.92978 | SUSD1_ENSG00000106868;RP11-165N19.2_ENSG00000225513                             |
| 9 | 115095410 | 1.15E+08 | KD2-H4K8ac_peak_29111 | 13.81781 | PTBP3_ENSG00000119314                                                           |
| 9 | 115096309 | 1.15E+08 | KD2-H4K8ac_peak_29112 | 10.21502 | PTBP3_ENSG00000119314                                                           |
| 9 | 115142501 | 1.15E+08 | KD2-H4K8ac_peak_29113 | 4.211    | HSDL2_ENSG00000119471                                                           |
| 9 | 115248615 | 1.15E+08 | KD2-H4K8ac_peak_29114 | 13.34404 | C9orf147_ENSG00000230185;KIAA1958_ENSG00000165185                               |
| 9 | 115249212 | 1.15E+08 | KD2-H4K8ac_peak_29115 | 13.09271 | C9orf147_ENSG00000230185;KIAA1958_ENSG00000165185                               |
| 9 | 115512353 | 1.16E+08 | KD2-H4K8ac_peak_29116 | 13.73635 | RP11-276E15.4_ENSG00000226609;SNX30_ENSG00000148158                             |

|   |           |          |                       |          |                                               |
|---|-----------|----------|-----------------------|----------|-----------------------------------------------|
| 9 | 115773916 | 1.16E+08 | KD2-H4K8ac_peak_29117 | 13.81781 | ZNF883_ENSG00000228623                        |
| 9 | 115910240 | 1.16E+08 | KD2-H4K8ac_peak_29118 | 10.2048  |                                               |
| 9 | 116038035 | 1.16E+08 | KD2-H4K8ac_peak_29119 | 8.79106  | CDC26_ENSG00000176386;PRPF4_ENSG00000136875   |
| 9 | 116102003 | 1.16E+08 | KD2-H4K8ac_peak_29120 | 5.30799  | WDR31_ENSG00000148225                         |
| 9 | 116139420 | 1.16E+08 | KD2-H4K8ac_peak_29121 | 11.92978 | HDHD3_ENSG00000119431                         |
| 9 | 116163894 | 1.16E+08 | KD2-H4K8ac_peak_29122 | 8.02571  | ALAD_ENSG00000148218                          |
| 9 | 116172307 | 1.16E+08 | KD2-H4K8ac_peak_29123 | 13.09607 | POLE3_ENSG00000148229;C9orf43_ENSG00000157653 |
| 9 | 116173753 | 1.16E+08 | KD2-H4K8ac_peak_29124 | 6.66692  | POLE3_ENSG00000148229                         |
| 9 | 116236465 | 1.16E+08 | KD2-H4K8ac_peak_29125 | 5.57044  |                                               |
| 9 | 116270646 | 1.16E+08 | KD2-H4K8ac_peak_29126 | 7.22457  |                                               |
| 9 | 116327019 | 1.16E+08 | KD2-H4K8ac_peak_29127 | 6.56211  |                                               |
| 9 | 116342110 | 1.16E+08 | KD2-H4K8ac_peak_29128 | 6.97919  |                                               |
| 9 | 116355948 | 1.16E+08 | KD2-H4K8ac_peak_29129 | 8.30974  |                                               |
| 9 | 116356889 | 1.16E+08 | KD2-H4K8ac_peak_29130 | 4.86324  |                                               |
| 9 | 116383145 | 1.16E+08 | KD2-H4K8ac_peak_29131 | 7.73132  |                                               |
| 9 | 116385610 | 1.16E+08 | KD2-H4K8ac_peak_29132 | 3.75035  |                                               |
| 9 | 116410728 | 1.16E+08 | KD2-H4K8ac_peak_29133 | 12.93209 |                                               |
| 9 | 116411706 | 1.16E+08 | KD2-H4K8ac_peak_29134 | 9.0912   |                                               |
| 9 | 116412497 | 1.16E+08 | KD2-H4K8ac_peak_29135 | 5.88845  | RP11-18B16.2_ENSG00000227482                  |
| 9 | 116420667 | 1.16E+08 | KD2-H4K8ac_peak_29136 | 8.26945  |                                               |
| 9 | 116569886 | 1.17E+08 | KD2-H4K8ac_peak_29137 | 6.25869  |                                               |
| 9 | 116638584 | 1.17E+08 | KD2-H4K8ac_peak_29138 | 24.46918 | ZNF618_ENSG00000157657                        |
| 9 | 116917831 | 1.17E+08 | KD2-H4K8ac_peak_29139 | 6.66692  | COL27A1_ENSG00000196739                       |
| 9 | 116989788 | 1.17E+08 | KD2-H4K8ac_peak_29140 | 5.557    |                                               |
| 9 | 117011775 | 1.17E+08 | KD2-H4K8ac_peak_29141 | 10.05606 |                                               |
| 9 | 117022607 | 1.17E+08 | KD2-H4K8ac_peak_29142 | 6.40683  |                                               |
| 9 | 117043653 | 1.17E+08 | KD2-H4K8ac_peak_29143 | 8.30114  |                                               |
| 9 | 117050590 | 1.17E+08 | KD2-H4K8ac_peak_29144 | 5.88845  |                                               |
| 9 | 117149946 | 1.17E+08 | KD2-H4K8ac_peak_29145 | 6.00226  |                                               |
| 9 | 117160409 | 1.17E+08 | KD2-H4K8ac_peak_29146 | 12.57143 | RP11-9M16.2_ENSG00000235119                   |
| 9 | 117161017 | 1.17E+08 | KD2-H4K8ac_peak_29147 | 6.99815  | RP11-9M16.2_ENSG00000235119                   |
| 9 | 117266927 | 1.17E+08 | KD2-H4K8ac_peak_29148 | 8.94469  | DFNB31_ENSG00000095397                        |
| 9 | 117349095 | 1.17E+08 | KD2-H4K8ac_peak_29149 | 5.51783  | ATP6V1G1_ENSG00000136888                      |
| 9 | 117373276 | 1.17E+08 | KD2-H4K8ac_peak_29150 | 20.39131 | C9orf91_ENSG00000157693                       |
| 9 | 118453694 | 1.18E+08 | KD2-H4K8ac_peak_29151 | 5.25071  |                                               |
| 9 | 119449136 | 1.19E+08 | KD2-H4K8ac_peak_29152 | 6.16888  | TRIM32_ENSG00000119401                        |
| 9 | 119748906 | 1.2E+08  | KD2-H4K8ac_peak_29153 | 7.01964  |                                               |
| 9 | 119946002 | 1.2E+08  | KD2-H4K8ac_peak_29154 | 5.14125  |                                               |
| 9 | 119947098 | 1.2E+08  | KD2-H4K8ac_peak_29155 | 5.43522  |                                               |
| 9 | 120039166 | 1.2E+08  | KD2-H4K8ac_peak_29156 | 5.54647  | RN7SKP125_ENSG00000222413                     |
| 9 | 120043930 | 1.2E+08  | KD2-H4K8ac_peak_29157 | 6.24747  |                                               |
| 9 | 120066555 | 1.2E+08  | KD2-H4K8ac_peak_29158 | 5.14125  |                                               |
| 9 | 120086964 | 1.2E+08  | KD2-H4K8ac_peak_29159 | 6.50927  |                                               |
| 9 | 120089450 | 1.2E+08  | KD2-H4K8ac_peak_29160 | 3.67671  |                                               |
| 9 | 120117816 | 1.2E+08  | KD2-H4K8ac_peak_29161 | 5.57044  |                                               |
| 9 | 120176217 | 1.2E+08  | KD2-H4K8ac_peak_29162 | 10.05606 | ASTN2_ENSG00000148219                         |

|   |           |          |                       |          |                                                   |
|---|-----------|----------|-----------------------|----------|---------------------------------------------------|
| 9 | 120250066 | 1.2E+08  | KD2-H4K8ac_peak_29163 | 6.66692  |                                                   |
| 9 | 120666847 | 1.21E+08 | KD2-H4K8ac_peak_29164 | 7.12754  |                                                   |
| 9 | 120680728 | 1.21E+08 | KD2-H4K8ac_peak_29165 | 4.24345  |                                                   |
| 9 | 120697521 | 1.21E+08 | KD2-H4K8ac_peak_29166 | 5.88845  |                                                   |
| 9 | 122318577 | 1.22E+08 | KD2-H4K8ac_peak_29167 | 9.15329  |                                                   |
| 9 | 123086824 | 1.23E+08 | KD2-H4K8ac_peak_29168 | 6.8836   |                                                   |
| 9 | 123146458 | 1.23E+08 | KD2-H4K8ac_peak_29169 | 5.88845  |                                                   |
| 9 | 123169352 | 1.23E+08 | KD2-H4K8ac_peak_29170 | 6.47635  |                                                   |
| 9 | 123342041 | 1.23E+08 | KD2-H4K8ac_peak_29171 | 13.50024 | CDK5RAP2_ENSG00000136861                          |
| 9 | 123342688 | 1.23E+08 | KD2-H4K8ac_peak_29172 | 8.94469  | CDK5RAP2_ENSG00000136861                          |
| 9 | 123476996 | 1.23E+08 | KD2-H4K8ac_peak_29173 | 30.86785 | MEGF9_ENSG00000106780                             |
| 9 | 123555166 | 1.24E+08 | KD2-H4K8ac_peak_29174 | 12.08081 | FBXW2_ENSG00000119402;RP11-271I.4_ENSG00000214654 |
| 9 | 123604875 | 1.24E+08 | KD2-H4K8ac_peak_29175 | 4.79789  | PSMD5_ENSG00000095261                             |
| 9 | 123637918 | 1.24E+08 | KD2-H4K8ac_peak_29176 | 7.90806  |                                                   |
| 9 | 123638573 | 1.24E+08 | KD2-H4K8ac_peak_29177 | 17.52599 | PHF19_ENSG00000119403                             |
| 9 | 123639842 | 1.24E+08 | KD2-H4K8ac_peak_29178 | 6.99815  | PHF19_ENSG00000119403                             |
| 9 | 123640618 | 1.24E+08 | KD2-H4K8ac_peak_29179 | 6.84261  |                                                   |
| 9 | 123678530 | 1.24E+08 | KD2-H4K8ac_peak_29180 | 5.09296  |                                                   |
| 9 | 123681059 | 1.24E+08 | KD2-H4K8ac_peak_29181 | 12.17278 |                                                   |
| 9 | 123683084 | 1.24E+08 | KD2-H4K8ac_peak_29182 | 5.88845  |                                                   |
| 9 | 123685135 | 1.24E+08 | KD2-H4K8ac_peak_29183 | 6.75638  |                                                   |
| 9 | 123698549 | 1.24E+08 | KD2-H4K8ac_peak_29184 | 8.30974  |                                                   |
| 9 | 123837278 | 1.24E+08 | KD2-H4K8ac_peak_29185 | 6.99815  | CNTRL_ENSG00000119397                             |
| 9 | 123963586 | 1.24E+08 | KD2-H4K8ac_peak_29186 | 4.06758  |                                                   |
| 9 | 124029932 | 1.24E+08 | KD2-H4K8ac_peak_29187 | 10.0692  |                                                   |
| 9 | 124132077 | 1.24E+08 | KD2-H4K8ac_peak_29188 | 8.23274  | STOM_ENSG00000148175                              |
| 9 | 124261562 | 1.24E+08 | KD2-H4K8ac_peak_29189 | 11.24702 | GGTA1P_ENSG00000204136                            |
| 9 | 124266107 | 1.24E+08 | KD2-H4K8ac_peak_29190 | 6.40297  |                                                   |
| 9 | 124267705 | 1.24E+08 | KD2-H4K8ac_peak_29191 | 5.30799  |                                                   |
| 9 | 124292116 | 1.24E+08 | KD2-H4K8ac_peak_29192 | 11.15071 |                                                   |
| 9 | 124307835 | 1.24E+08 | KD2-H4K8ac_peak_29193 | 5.75757  |                                                   |
| 9 | 124308508 | 1.24E+08 | KD2-H4K8ac_peak_29194 | 14.66631 |                                                   |
| 9 | 124313048 | 1.24E+08 | KD2-H4K8ac_peak_29195 | 6.4095   |                                                   |
| 9 | 124329259 | 1.24E+08 | KD2-H4K8ac_peak_29196 | 11.66477 | DAB2IP_ENSG00000136848                            |
| 9 | 124330194 | 1.24E+08 | KD2-H4K8ac_peak_29197 | 6.80057  | DAB2IP_ENSG00000136848                            |
| 9 | 124361316 | 1.24E+08 | KD2-H4K8ac_peak_29198 | 8.10216  |                                                   |
| 9 | 124362526 | 1.24E+08 | KD2-H4K8ac_peak_29199 | 7.35686  |                                                   |
| 9 | 124408901 | 1.24E+08 | KD2-H4K8ac_peak_29200 | 6.11333  |                                                   |
| 9 | 124411256 | 1.24E+08 | KD2-H4K8ac_peak_29201 | 10.54073 |                                                   |
| 9 | 124411693 | 1.24E+08 | KD2-H4K8ac_peak_29202 | 7.47462  |                                                   |
| 9 | 124413591 | 1.24E+08 | KD2-H4K8ac_peak_29203 | 11.28831 |                                                   |
| 9 | 124461775 | 1.24E+08 | KD2-H4K8ac_peak_29204 | 3.83717  |                                                   |
| 9 | 124855748 | 1.25E+08 | KD2-H4K8ac_peak_29205 | 13.92307 | TTLL11_ENSG00000175764                            |
| 9 | 124921736 | 1.25E+08 | KD2-H4K8ac_peak_29206 | 5.4779   | NDUFA8_ENSG00000119421;MORN5_ENSG00000185681      |
| 9 | 125026689 | 1.25E+08 | KD2-H4K8ac_peak_29207 | 11.92978 | RBM18_ENSG00000119446;MRRF_ENSG00000148187        |
| 9 | 125108978 | 1.25E+08 | KD2-H4K8ac_peak_29208 | 8.59579  |                                                   |

|   |           |          |                       |          |                                                     |
|---|-----------|----------|-----------------------|----------|-----------------------------------------------------|
| 9 | 125168181 | 1.25E+08 | KD2-H4K8ac_peak_29209 | 11.92978 |                                                     |
| 9 | 125590535 | 1.26E+08 | KD2-H4K8ac_peak_29210 | 9.95119  | PDCL_ENSG00000136940                                |
| 9 | 125667239 | 1.26E+08 | KD2-H4K8ac_peak_29211 | 12.93209 | RC3H2_ENSG00000056586                               |
| 9 | 125675282 | 1.26E+08 | KD2-H4K8ac_peak_29212 | 11.92978 | ZBTB6_ENSG00000186130                               |
| 9 | 125693229 | 1.26E+08 | KD2-H4K8ac_peak_29213 | 11.50346 | ZBTB26_ENSG00000171448                              |
| 9 | 125702823 | 1.26E+08 | KD2-H4K8ac_peak_29214 | 6.66692  | RABGAP1_ENSG00000011454                             |
| 9 | 126030982 | 1.26E+08 | KD2-H4K8ac_peak_29215 | 10.96455 | STRBP_ENSG00000165209                               |
| 9 | 126079900 | 1.26E+08 | KD2-H4K8ac_peak_29216 | 5.40356  |                                                     |
| 9 | 126122835 | 1.26E+08 | KD2-H4K8ac_peak_29217 | 7.47462  |                                                     |
| 9 | 126235929 | 1.26E+08 | KD2-H4K8ac_peak_29218 | 6.61376  |                                                     |
| 9 | 126691851 | 1.27E+08 | KD2-H4K8ac_peak_29219 | 10.29344 | DENND1A_ENSG00000119522                             |
| 9 | 126692604 | 1.27E+08 | KD2-H4K8ac_peak_29220 | 11.05407 | DENND1A_ENSG00000119522                             |
| 9 | 126803401 | 1.27E+08 | KD2-H4K8ac_peak_29221 | 11.66127 |                                                     |
| 9 | 126807361 | 1.27E+08 | KD2-H4K8ac_peak_29222 | 8.10216  |                                                     |
| 9 | 127082278 | 1.27E+08 | KD2-H4K8ac_peak_29223 | 18.78112 |                                                     |
| 9 | 127176989 | 1.27E+08 | KD2-H4K8ac_peak_29224 | 10.29344 | PSMB7_ENSG00000136930                               |
| 9 | 127182048 | 1.27E+08 | KD2-H4K8ac_peak_29225 | 7.49599  |                                                     |
| 9 | 127212833 | 1.27E+08 | KD2-H4K8ac_peak_29226 | 7.40314  | GPR144_ENSG00000180264                              |
| 9 | 127239284 | 1.27E+08 | KD2-H4K8ac_peak_29227 | 21.60865 |                                                     |
| 9 | 127274152 | 1.27E+08 | KD2-H4K8ac_peak_29228 | 6.65673  |                                                     |
| 9 | 127533152 | 1.28E+08 | KD2-H4K8ac_peak_29229 | 5.20908  | NR6A1_ENSG00000148200;RP11-175D17.3_ENSG00000236643 |
| 9 | 127581162 | 1.28E+08 | KD2-H4K8ac_peak_29230 | 8.79106  |                                                     |
| 9 | 127623728 | 1.28E+08 | KD2-H4K8ac_peak_29231 | 14.34493 | RPL35_ENSG00000136942;ARPC5L_ENSG00000136950        |
| 9 | 127630800 | 1.28E+08 | KD2-H4K8ac_peak_29232 | 13.80019 |                                                     |
| 9 | 127631570 | 1.28E+08 | KD2-H4K8ac_peak_29233 | 10.05606 |                                                     |
| 9 | 127702949 | 1.28E+08 | KD2-H4K8ac_peak_29234 | 9.57101  |                                                     |
| 9 | 127703489 | 1.28E+08 | KD2-H4K8ac_peak_29235 | 15.25814 |                                                     |
| 9 | 127951541 | 1.28E+08 | KD2-H4K8ac_peak_29236 | 14.8083  | PPP6C_ENSG00000119414                               |
| 9 | 128003219 | 1.28E+08 | KD2-H4K8ac_peak_29237 | 4.211    | HSPA5_ENSG00000044574;RP11-65N13.8_ENSG00000239705  |
| 9 | 128003957 | 1.28E+08 | KD2-H4K8ac_peak_29238 | 12.57865 | HSPA5_ENSG00000044574;RP11-65N13.8_ENSG00000239705  |
| 9 | 128136783 | 1.28E+08 | KD2-H4K8ac_peak_29239 | 4.8485   |                                                     |
| 9 | 128169960 | 1.28E+08 | KD2-H4K8ac_peak_29240 | 18.79324 |                                                     |
| 9 | 128195625 | 1.28E+08 | KD2-H4K8ac_peak_29241 | 10.5847  |                                                     |
| 9 | 128469043 | 1.28E+08 | KD2-H4K8ac_peak_29242 | 9.89383  | MAPKAP1_ENSG00000119487                             |
| 9 | 128509693 | 1.29E+08 | KD2-H4K8ac_peak_29243 | 16.80494 | RP11-423C15.3_ENSG00000229582;PBX3_ENSG00000167081  |
| 9 | 128518735 | 1.29E+08 | KD2-H4K8ac_peak_29244 | 7.12754  |                                                     |
| 9 | 128652002 | 1.29E+08 | KD2-H4K8ac_peak_29245 | 12.06346 |                                                     |
| 9 | 128729995 | 1.29E+08 | KD2-H4K8ac_peak_29246 | 5.20908  |                                                     |
| 9 | 128752610 | 1.29E+08 | KD2-H4K8ac_peak_29247 | 9.63487  |                                                     |
| 9 | 128754325 | 1.29E+08 | KD2-H4K8ac_peak_29248 | 5.82859  |                                                     |
| 9 | 128818876 | 1.29E+08 | KD2-H4K8ac_peak_29249 | 9.12849  | RP11-343J18.2_ENSG00000232413                       |
| 9 | 128819787 | 1.29E+08 | KD2-H4K8ac_peak_29250 | 8.30974  | RP11-343J18.2_ENSG00000232413                       |
| 9 | 128821105 | 1.29E+08 | KD2-H4K8ac_peak_29251 | 15.59774 |                                                     |
| 9 | 128912135 | 1.29E+08 | KD2-H4K8ac_peak_29252 | 4.98072  |                                                     |
| 9 | 128912773 | 1.29E+08 | KD2-H4K8ac_peak_29253 | 7.07512  |                                                     |
| 9 | 128913879 | 1.29E+08 | KD2-H4K8ac_peak_29254 | 8.90871  |                                                     |



|   |           |          |                       |          |                               |
|---|-----------|----------|-----------------------|----------|-------------------------------|
| 9 | 129037824 | 1.29E+08 | KD2-H4K8ac_peak_29255 | 12.06346 | RP11-343J18.1_ENSG00000228392 |
| 9 | 129088271 | 1.29E+08 | KD2-H4K8ac_peak_29256 | 14.55656 | MVB12B_ENSG00000196814        |
| 9 | 129089106 | 1.29E+08 | KD2-H4K8ac_peak_29257 | 10.08707 | MVB12B_ENSG00000196814        |
| 9 | 129138640 | 1.29E+08 | KD2-H4K8ac_peak_29258 | 9.02371  |                               |
| 9 | 129262050 | 1.29E+08 | KD2-H4K8ac_peak_29259 | 9.0912   |                               |
| 9 | 129263502 | 1.29E+08 | KD2-H4K8ac_peak_29260 | 12.46522 |                               |
| 9 | 129265227 | 1.29E+08 | KD2-H4K8ac_peak_29261 | 4.42765  |                               |
| 9 | 129268752 | 1.29E+08 | KD2-H4K8ac_peak_29262 | 7.76329  |                               |
| 9 | 129269644 | 1.29E+08 | KD2-H4K8ac_peak_29263 | 12.34045 |                               |
| 9 | 129271844 | 1.29E+08 | KD2-H4K8ac_peak_29264 | 8.83582  |                               |
| 9 | 129272925 | 1.29E+08 | KD2-H4K8ac_peak_29265 | 6.99815  |                               |
| 9 | 129275817 | 1.29E+08 | KD2-H4K8ac_peak_29266 | 11.80283 |                               |
| 9 | 129277975 | 1.29E+08 | KD2-H4K8ac_peak_29267 | 4.67342  | RP11-205K6.1_ENSG00000233721  |
| 9 | 129279070 | 1.29E+08 | KD2-H4K8ac_peak_29268 | 10.05606 | RP11-205K6.1_ENSG00000233721  |
| 9 | 129282286 | 1.29E+08 | KD2-H4K8ac_peak_29269 | 6.37852  |                               |
| 9 | 129284119 | 1.29E+08 | KD2-H4K8ac_peak_29270 | 9.61895  |                               |
| 9 | 129285878 | 1.29E+08 | KD2-H4K8ac_peak_29271 | 5.405    |                               |
| 9 | 129286793 | 1.29E+08 | KD2-H4K8ac_peak_29272 | 9.44423  |                               |
| 9 | 129287915 | 1.29E+08 | KD2-H4K8ac_peak_29273 | 6.66692  |                               |
| 9 | 129288701 | 1.29E+08 | KD2-H4K8ac_peak_29274 | 8.55271  | RP11-205K6.2_ENSG00000226078  |
| 9 | 129289645 | 1.29E+08 | KD2-H4K8ac_peak_29275 | 8.2413   | RP11-205K6.2_ENSG00000226078  |
| 9 | 129291001 | 1.29E+08 | KD2-H4K8ac_peak_29276 | 4.64388  |                               |
| 9 | 129292441 | 1.29E+08 | KD2-H4K8ac_peak_29277 | 4.3437   | AL356309.1_ENSG00000221768    |
| 9 | 129293241 | 1.29E+08 | KD2-H4K8ac_peak_29278 | 21.2844  | AL356309.1_ENSG00000221768    |
| 9 | 129295137 | 1.29E+08 | KD2-H4K8ac_peak_29279 | 8.58725  |                               |
| 9 | 129296139 | 1.29E+08 | KD2-H4K8ac_peak_29280 | 16.14659 |                               |
| 9 | 129297377 | 1.29E+08 | KD2-H4K8ac_peak_29281 | 13.81781 |                               |
| 9 | 129299214 | 1.29E+08 | KD2-H4K8ac_peak_29282 | 7.6718   |                               |
| 9 | 129307483 | 1.29E+08 | KD2-H4K8ac_peak_29283 | 8.94415  |                               |
| 9 | 129309958 | 1.29E+08 | KD2-H4K8ac_peak_29284 | 15.61313 |                               |
| 9 | 129310569 | 1.29E+08 | KD2-H4K8ac_peak_29285 | 17.55491 |                               |
| 9 | 129312269 | 1.29E+08 | KD2-H4K8ac_peak_29286 | 5.13615  |                               |
| 9 | 129312698 | 1.29E+08 | KD2-H4K8ac_peak_29287 | 30.35433 |                               |
| 9 | 129313733 | 1.29E+08 | KD2-H4K8ac_peak_29288 | 3.90565  |                               |
| 9 | 129314501 | 1.29E+08 | KD2-H4K8ac_peak_29289 | 5.87879  |                               |
| 9 | 129318935 | 1.29E+08 | KD2-H4K8ac_peak_29290 | 7.36799  |                               |
| 9 | 129325937 | 1.29E+08 | KD2-H4K8ac_peak_29291 | 6.60096  |                               |
| 9 | 129481955 | 1.29E+08 | KD2-H4K8ac_peak_29292 | 6.99815  |                               |
| 9 | 129484498 | 1.29E+08 | KD2-H4K8ac_peak_29293 | 24.23593 |                               |
| 9 | 129566695 | 1.3E+08  | KD2-H4K8ac_peak_29294 | 13.56049 | ZBTB43_ENSG00000169155        |
| 9 | 129567354 | 1.3E+08  | KD2-H4K8ac_peak_29295 | 9.36516  | ZBTB43_ENSG00000169155        |
| 9 | 129622198 | 1.3E+08  | KD2-H4K8ac_peak_29296 | 31.20771 | ZBTB34_ENSG00000177125        |
| 9 | 129677103 | 1.3E+08  | KD2-H4K8ac_peak_29297 | 12.06346 | RALGPS1_ENSG00000136828       |
| 9 | 129783420 | 1.3E+08  | KD2-H4K8ac_peak_29298 | 5.30799  |                               |
| 9 | 129784438 | 1.3E+08  | KD2-H4K8ac_peak_29299 | 6.2781   |                               |
| 9 | 129884634 | 1.3E+08  | KD2-H4K8ac_peak_29300 | 11.89502 | ANGPTL2_ENSG00000136859       |

|   |           |          |                       |          |                                                   |
|---|-----------|----------|-----------------------|----------|---------------------------------------------------|
| 9 | 129893018 | 1.3E+08  | KD2-H4K8ac_peak_29301 | 7.55771  |                                                   |
| 9 | 130159615 | 1.3E+08  | KD2-H4K8ac_peak_29302 | 5.82859  | SLC2A8_ENSG00000136856                            |
| 9 | 130213234 | 1.3E+08  | KD2-H4K8ac_peak_29303 | 5.1628   | RPL12_ENSG00000197958;LRSAM1_ENSG00000148356      |
| 9 | 130214207 | 1.3E+08  | KD2-H4K8ac_peak_29304 | 8.23274  | RPL12_ENSG00000197958;LRSAM1_ENSG00000148356      |
| 9 | 130332036 | 1.3E+08  | KD2-H4K8ac_peak_29305 | 4.70206  |                                                   |
| 9 | 130333307 | 1.3E+08  | KD2-H4K8ac_peak_29306 | 4.76709  |                                                   |
| 9 | 130370386 | 1.3E+08  | KD2-H4K8ac_peak_29307 | 14.19272 |                                                   |
| 9 | 130374043 | 1.3E+08  | KD2-H4K8ac_peak_29308 | 12.00597 | STXBP1_ENSG00000136854                            |
| 9 | 130374625 | 1.3E+08  | KD2-H4K8ac_peak_29309 | 6.65673  | STXBP1_ENSG00000136854                            |
| 9 | 130426727 | 1.3E+08  | KD2-H4K8ac_peak_29310 | 8.55271  |                                                   |
| 9 | 130427767 | 1.3E+08  | KD2-H4K8ac_peak_29311 | 6.16883  |                                                   |
| 9 | 130428709 | 1.3E+08  | KD2-H4K8ac_peak_29312 | 5.82799  |                                                   |
| 9 | 130461447 | 1.3E+08  | KD2-H4K8ac_peak_29313 | 7.146    |                                                   |
| 9 | 130486293 | 1.3E+08  | KD2-H4K8ac_peak_29314 | 9.1707   | PTRH1_ENSG00000187024                             |
| 9 | 130496645 | 1.3E+08  | KD2-H4K8ac_peak_29315 | 9.65086  | TOR2A_ENSG00000160404                             |
| 9 | 130530049 | 1.31E+08 | KD2-H4K8ac_peak_29316 | 7.76329  |                                                   |
| 9 | 130541141 | 1.31E+08 | KD2-H4K8ac_peak_29317 | 4.37809  | SH2D3C_ENSG00000095370                            |
| 9 | 130547458 | 1.31E+08 | KD2-H4K8ac_peak_29318 | 7.49599  | CDK9_ENSG00000136807;MIR3960_ENSG00000266070      |
| 9 | 130565268 | 1.31E+08 | KD2-H4K8ac_peak_29319 | 12.82393 |                                                   |
| 9 | 130575549 | 1.31E+08 | KD2-H4K8ac_peak_29320 | 6.25869  |                                                   |
| 9 | 130576157 | 1.31E+08 | KD2-H4K8ac_peak_29321 | 5.14125  |                                                   |
| 9 | 130615736 | 1.31E+08 | KD2-H4K8ac_peak_29322 | 7.67504  |                                                   |
| 9 | 130616497 | 1.31E+08 | KD2-H4K8ac_peak_29323 | 9.41619  | ENG_ENSG00000106991                               |
| 9 | 130620575 | 1.31E+08 | KD2-H4K8ac_peak_29324 | 6.25869  |                                                   |
| 9 | 130639661 | 1.31E+08 | KD2-H4K8ac_peak_29325 | 7.51054  | AK1_ENSG00000106992                               |
| 9 | 130678830 | 1.31E+08 | KD2-H4K8ac_peak_29326 | 7.45501  | ST6GALNAC4_ENSG00000136840                        |
| 9 | 130683626 | 1.31E+08 | KD2-H4K8ac_peak_29327 | 5.14125  |                                                   |
| 9 | 130726154 | 1.31E+08 | KD2-H4K8ac_peak_29328 | 9.74423  |                                                   |
| 9 | 130728123 | 1.31E+08 | KD2-H4K8ac_peak_29329 | 12.93253 |                                                   |
| 9 | 130730462 | 1.31E+08 | KD2-H4K8ac_peak_29330 | 8.55271  |                                                   |
| 9 | 130731695 | 1.31E+08 | KD2-H4K8ac_peak_29331 | 6.31785  |                                                   |
| 9 | 130733946 | 1.31E+08 | KD2-H4K8ac_peak_29332 | 14.17488 |                                                   |
| 9 | 130735439 | 1.31E+08 | KD2-H4K8ac_peak_29333 | 15.13116 |                                                   |
| 9 | 130736499 | 1.31E+08 | KD2-H4K8ac_peak_29334 | 14.48104 |                                                   |
| 9 | 130763691 | 1.31E+08 | KD2-H4K8ac_peak_29335 | 9.89126  |                                                   |
| 9 | 130766867 | 1.31E+08 | KD2-H4K8ac_peak_29336 | 6.24747  |                                                   |
| 9 | 130788962 | 1.31E+08 | KD2-H4K8ac_peak_29337 | 3.75035  |                                                   |
| 9 | 130790159 | 1.31E+08 | KD2-H4K8ac_peak_29338 | 6.10699  |                                                   |
| 9 | 130791124 | 1.31E+08 | KD2-H4K8ac_peak_29339 | 6.64891  |                                                   |
| 9 | 130797282 | 1.31E+08 | KD2-H4K8ac_peak_29340 | 7.27716  |                                                   |
| 9 | 130805547 | 1.31E+08 | KD2-H4K8ac_peak_29341 | 6.5996   |                                                   |
| 9 | 130818545 | 1.31E+08 | KD2-H4K8ac_peak_29342 | 7.42204  | RP11-379C10.1_ENSG00000230848                     |
| 9 | 130853225 | 1.31E+08 | KD2-H4K8ac_peak_29343 | 6.99815  |                                                   |
| 9 | 130853915 | 1.31E+08 | KD2-H4K8ac_peak_29344 | 4.03256  |                                                   |
| 9 | 130889591 | 1.31E+08 | KD2-H4K8ac_peak_29345 | 6.65673  | PTGES2_ENSG00000148334;AL590708.2_ENSG00000232850 |
| 9 | 130890080 | 1.31E+08 | KD2-H4K8ac_peak_29346 | 17.14947 | PTGES2_ENSG00000148334;AL590708.2_ENSG00000232850 |

|   |           |          |                       |          |                                                       |
|---|-----------|----------|-----------------------|----------|-------------------------------------------------------|
| 9 | 130953656 | 1.31E+08 | KD2-H4K8ac_peak_29347 | 7.73264  |                                                       |
| 9 | 130955371 | 1.31E+08 | KD2-H4K8ac_peak_29348 | 6.65673  |                                                       |
| 9 | 130966264 | 1.31E+08 | KD2-H4K8ac_peak_29349 | 10.30284 | CIZ1_ENSG00000148337;DNM1_ENSG00000106976             |
| 9 | 131005718 | 1.31E+08 | KD2-H4K8ac_peak_29350 | 10.0692  | MIR199B_ENSG00000207581                               |
| 9 | 131006565 | 1.31E+08 | KD2-H4K8ac_peak_29351 | 6.25869  | MIR199B_ENSG00000207581;MIR3154_ENSG00000264823       |
| 9 | 131007551 | 1.31E+08 | KD2-H4K8ac_peak_29352 | 14.80472 | MIR199B_ENSG00000207581;MIR3154_ENSG00000264823       |
| 9 | 131083772 | 1.31E+08 | KD2-H4K8ac_peak_29353 | 4.01115  | TRUB2_ENSG00000167112;COQ4_ENSG00000167113            |
| 9 | 131084647 | 1.31E+08 | KD2-H4K8ac_peak_29354 | 15.039   | TRUB2_ENSG00000167112;COQ4_ENSG00000167113            |
| 9 | 131123928 | 1.31E+08 | KD2-H4K8ac_peak_29355 | 10.21366 |                                                       |
| 9 | 131133187 | 1.31E+08 | KD2-H4K8ac_peak_29356 | 10.72656 | URM1_ENSG00000167118                                  |
| 9 | 131133718 | 1.31E+08 | KD2-H4K8ac_peak_29357 | 4.86324  | URM1_ENSG00000167118                                  |
| 9 | 131174548 | 1.31E+08 | KD2-H4K8ac_peak_29358 | 5.45396  | CERCAM_ENSG00000167123                                |
| 9 | 131181510 | 1.31E+08 | KD2-H4K8ac_peak_29359 | 9.89383  |                                                       |
| 9 | 131182229 | 1.31E+08 | KD2-H4K8ac_peak_29360 | 12.79505 |                                                       |
| 9 | 131201178 | 1.31E+08 | KD2-H4K8ac_peak_29361 | 6.0605   |                                                       |
| 9 | 131218518 | 1.31E+08 | KD2-H4K8ac_peak_29362 | 4.67342  |                                                       |
| 9 | 131267073 | 1.31E+08 | KD2-H4K8ac_peak_29363 | 10.29344 |                                                       |
| 9 | 131314936 | 1.31E+08 | KD2-H4K8ac_peak_29364 | 7.49599  | RP11-216B9.6_ENSG00000228395;SPTAN1_ENSG00000197694   |
| 9 | 131419110 | 1.31E+08 | KD2-H4K8ac_peak_29365 | 7.07117  | WDR34_ENSG00000119333                                 |
| 9 | 131419701 | 1.31E+08 | KD2-H4K8ac_peak_29366 | 4.8485   | WDR34_ENSG00000119333                                 |
| 9 | 131450927 | 1.31E+08 | KD2-H4K8ac_peak_29367 | 20.2003  |                                                       |
| 9 | 131451643 | 1.31E+08 | KD2-H4K8ac_peak_29368 | 6.69204  |                                                       |
| 9 | 131452296 | 1.31E+08 | KD2-H4K8ac_peak_29369 | 15.22643 |                                                       |
| 9 | 131464814 | 1.31E+08 | KD2-H4K8ac_peak_29370 | 9.63487  | PKN3_ENSG00000160447                                  |
| 9 | 131485839 | 1.31E+08 | KD2-H4K8ac_peak_29371 | 10.99466 | ZDHHC12_ENSG00000160446;RP11-545E17.3_ENSG00000223478 |
| 9 | 131495735 | 1.31E+08 | KD2-H4K8ac_peak_29372 | 9.66321  |                                                       |
| 9 | 131533966 | 1.32E+08 | KD2-H4K8ac_peak_29373 | 9.91109  | ZER1_ENSG00000160445                                  |
| 9 | 131534412 | 1.32E+08 | KD2-H4K8ac_peak_29374 | 8.53092  | ZER1_ENSG00000160445                                  |
| 9 | 131549016 | 1.32E+08 | KD2-H4K8ac_peak_29375 | 10.30284 | TBC1D13_ENSG00000107021                               |
| 9 | 131581323 | 1.32E+08 | KD2-H4K8ac_peak_29376 | 4.01615  | ENDOG_ENSG00000167136                                 |
| 9 | 131591771 | 1.32E+08 | KD2-H4K8ac_peak_29377 | 8.79106  | C9orf114_ENSG00000198917                              |
| 9 | 131644500 | 1.32E+08 | KD2-H4K8ac_peak_29378 | 10.43145 | LRRC8A_ENSG00000136802;CCBL1_ENSG00000171097          |
| 9 | 131675976 | 1.32E+08 | KD2-H4K8ac_peak_29379 | 4.01115  |                                                       |
| 9 | 131690574 | 1.32E+08 | KD2-H4K8ac_peak_29380 | 5.14125  |                                                       |
| 9 | 131709457 | 1.32E+08 | KD2-H4K8ac_peak_29381 | 10.44656 | DOLK_ENSG00000175283;NUP188_ENSG00000095319           |
| 9 | 131710033 | 1.32E+08 | KD2-H4K8ac_peak_29382 | 12.06346 | DOLK_ENSG00000175283;NUP188_ENSG00000095319           |
| 9 | 131791507 | 1.32E+08 | KD2-H4K8ac_peak_29383 | 5.98124  |                                                       |
| 9 | 131797964 | 1.32E+08 | KD2-H4K8ac_peak_29384 | 7.95934  | FAM73B_ENSG00000148343                                |
| 9 | 131831404 | 1.32E+08 | KD2-H4K8ac_peak_29385 | 6.8836   |                                                       |
| 9 | 131843508 | 1.32E+08 | KD2-H4K8ac_peak_29386 | 6.40297  | DOLPP1_ENSG00000167130                                |
| 9 | 131872638 | 1.32E+08 | KD2-H4K8ac_peak_29387 | 6.20982  | CRAT_ENSG00000095321;PPP2R4_ENSG00000119383           |
| 9 | 131873356 | 1.32E+08 | KD2-H4K8ac_peak_29388 | 12.17278 | CRAT_ENSG00000095321;PPP2R4_ENSG00000119383           |
| 9 | 131901803 | 1.32E+08 | KD2-H4K8ac_peak_29389 | 12.93209 |                                                       |
| 9 | 131902563 | 1.32E+08 | KD2-H4K8ac_peak_29390 | 19.25648 |                                                       |
| 9 | 131936045 | 1.32E+08 | KD2-H4K8ac_peak_29391 | 10.7186  |                                                       |
| 9 | 131937388 | 1.32E+08 | KD2-H4K8ac_peak_29392 | 8.4716   | RP11-247A12.8_ENSG00000268050                         |

|   |           |          |                       |          |                                                             |
|---|-----------|----------|-----------------------|----------|-------------------------------------------------------------|
| 9 | 131938717 | 1.32E+08 | KD2-H4K8ac_peak_29393 | 8.4627   | RP11-247A12.8_ENSG00000268050;RP11-247A12.2_ENSG00000204055 |
| 9 | 131940722 | 1.32E+08 | KD2-H4K8ac_peak_29394 | 8.30974  | IER5L_ENSG00000188483                                       |
| 9 | 131965193 | 1.32E+08 | KD2-H4K8ac_peak_29395 | 19.30653 |                                                             |
| 9 | 131987046 | 1.32E+08 | KD2-H4K8ac_peak_29396 | 6.76298  |                                                             |
| 9 | 131987609 | 1.32E+08 | KD2-H4K8ac_peak_29397 | 9.49967  |                                                             |
| 9 | 132004994 | 1.32E+08 | KD2-H4K8ac_peak_29398 | 4.04247  |                                                             |
| 9 | 132020396 | 1.32E+08 | KD2-H4K8ac_peak_29399 | 4.98072  | RP11-344B5.4_ENSG00000235007;RP11-344B5.3_ENSG00000241084   |
| 9 | 132081950 | 1.32E+08 | KD2-H4K8ac_peak_29400 | 10.30284 | C9orf106_ENSG00000179082                                    |
| 9 | 132083403 | 1.32E+08 | KD2-H4K8ac_peak_29401 | 9.11031  | C9orf106_ENSG00000179082                                    |
| 9 | 132096033 | 1.32E+08 | KD2-H4K8ac_peak_29402 | 3.97079  |                                                             |
| 9 | 132096745 | 1.32E+08 | KD2-H4K8ac_peak_29403 | 9.63487  |                                                             |
| 9 | 132114172 | 1.32E+08 | KD2-H4K8ac_peak_29404 | 12.48406 |                                                             |
| 9 | 132115218 | 1.32E+08 | KD2-H4K8ac_peak_29405 | 7.07117  |                                                             |
| 9 | 132124830 | 1.32E+08 | KD2-H4K8ac_peak_29406 | 5.9696   |                                                             |
| 9 | 132144678 | 1.32E+08 | KD2-H4K8ac_peak_29407 | 11.05407 |                                                             |
| 9 | 132148895 | 1.32E+08 | KD2-H4K8ac_peak_29408 | 5.405    |                                                             |
| 9 | 132154402 | 1.32E+08 | KD2-H4K8ac_peak_29409 | 9.72244  |                                                             |
| 9 | 132156173 | 1.32E+08 | KD2-H4K8ac_peak_29410 | 7.28628  |                                                             |
| 9 | 132156914 | 1.32E+08 | KD2-H4K8ac_peak_29411 | 21.11201 |                                                             |
| 9 | 132164593 | 1.32E+08 | KD2-H4K8ac_peak_29412 | 17.95758 |                                                             |
| 9 | 132166455 | 1.32E+08 | KD2-H4K8ac_peak_29413 | 5.54647  |                                                             |
| 9 | 132171267 | 1.32E+08 | KD2-H4K8ac_peak_29414 | 5.13615  |                                                             |
| 9 | 132173698 | 1.32E+08 | KD2-H4K8ac_peak_29415 | 4.85088  |                                                             |
| 9 | 132174783 | 1.32E+08 | KD2-H4K8ac_peak_29416 | 24.02151 |                                                             |
| 9 | 132178334 | 1.32E+08 | KD2-H4K8ac_peak_29417 | 8.16906  |                                                             |
| 9 | 132178891 | 1.32E+08 | KD2-H4K8ac_peak_29418 | 6.65673  |                                                             |
| 9 | 132182119 | 1.32E+08 | KD2-H4K8ac_peak_29419 | 6.17833  |                                                             |
| 9 | 132185622 | 1.32E+08 | KD2-H4K8ac_peak_29420 | 6.36375  |                                                             |
| 9 | 132190001 | 1.32E+08 | KD2-H4K8ac_peak_29421 | 10.96455 |                                                             |
| 9 | 132190923 | 1.32E+08 | KD2-H4K8ac_peak_29422 | 14.43401 |                                                             |
| 9 | 132193485 | 1.32E+08 | KD2-H4K8ac_peak_29423 | 8.49564  |                                                             |
| 9 | 132194664 | 1.32E+08 | KD2-H4K8ac_peak_29424 | 7.36799  |                                                             |
| 9 | 132199382 | 1.32E+08 | KD2-H4K8ac_peak_29425 | 10.43145 | RP11-65J3.2_ENSG00000226355                                 |
| 9 | 132213351 | 1.32E+08 | KD2-H4K8ac_peak_29426 | 7.47462  | RP11-65J3.3_ENSG00000230676                                 |
| 9 | 132214001 | 1.32E+08 | KD2-H4K8ac_peak_29427 | 5.88845  | RP11-65J3.3_ENSG00000230676                                 |
| 9 | 132220766 | 1.32E+08 | KD2-H4K8ac_peak_29428 | 21.09086 |                                                             |
| 9 | 132222907 | 1.32E+08 | KD2-H4K8ac_peak_29429 | 31.49773 |                                                             |
| 9 | 132227173 | 1.32E+08 | KD2-H4K8ac_peak_29430 | 11.03331 |                                                             |
| 9 | 132228385 | 1.32E+08 | KD2-H4K8ac_peak_29431 | 5.30799  |                                                             |
| 9 | 132229473 | 1.32E+08 | KD2-H4K8ac_peak_29432 | 9.11031  |                                                             |
| 9 | 132243668 | 1.32E+08 | KD2-H4K8ac_peak_29433 | 9.36516  | RP11-65J3.14_ENSG00000261334                                |
| 9 | 132244152 | 1.32E+08 | KD2-H4K8ac_peak_29434 | 29.36261 | RP11-65J3.14_ENSG00000261334;LINC00963_ENSG00000204054      |
| 9 | 132245017 | 1.32E+08 | KD2-H4K8ac_peak_29435 | 16.49944 | RP11-65J3.14_ENSG00000261334;LINC00963_ENSG00000204054      |
| 9 | 132247685 | 1.32E+08 | KD2-H4K8ac_peak_29436 | 8.46569  |                                                             |
| 9 | 132248369 | 1.32E+08 | KD2-H4K8ac_peak_29437 | 10.13309 |                                                             |
| 9 | 132249369 | 1.32E+08 | KD2-H4K8ac_peak_29438 | 8.65175  |                                                             |

|   |           |          |                       |          |                                                    |
|---|-----------|----------|-----------------------|----------|----------------------------------------------------|
| 9 | 132251576 | 1.32E+08 | KD2-H4K8ac_peak_29439 | 4.70206  |                                                    |
| 9 | 132252212 | 1.32E+08 | KD2-H4K8ac_peak_29440 | 3.82395  |                                                    |
| 9 | 132252930 | 1.32E+08 | KD2-H4K8ac_peak_29441 | 7.29931  |                                                    |
| 9 | 132258475 | 1.32E+08 | KD2-H4K8ac_peak_29442 | 12.00597 |                                                    |
| 9 | 132259462 | 1.32E+08 | KD2-H4K8ac_peak_29443 | 9.30599  |                                                    |
| 9 | 132262500 | 1.32E+08 | KD2-H4K8ac_peak_29444 | 12.00597 | RP11-492E3.51_ENSG00000239353                      |
| 9 | 132312263 | 1.32E+08 | KD2-H4K8ac_peak_29445 | 6.20982  |                                                    |
| 9 | 132319523 | 1.32E+08 | KD2-H4K8ac_peak_29446 | 7.76104  |                                                    |
| 9 | 132321162 | 1.32E+08 | KD2-H4K8ac_peak_29447 | 11.92978 |                                                    |
| 9 | 132324194 | 1.32E+08 | KD2-H4K8ac_peak_29448 | 8.28234  |                                                    |
| 9 | 132330415 | 1.32E+08 | KD2-H4K8ac_peak_29449 | 5.01002  |                                                    |
| 9 | 132331361 | 1.32E+08 | KD2-H4K8ac_peak_29450 | 8.5092   |                                                    |
| 9 | 132332445 | 1.32E+08 | KD2-H4K8ac_peak_29451 | 7.51054  |                                                    |
| 9 | 132333278 | 1.32E+08 | KD2-H4K8ac_peak_29452 | 7.57979  |                                                    |
| 9 | 132347075 | 1.32E+08 | KD2-H4K8ac_peak_29453 | 6.99815  |                                                    |
| 9 | 132358840 | 1.32E+08 | KD2-H4K8ac_peak_29454 | 6.99815  |                                                    |
| 9 | 132359803 | 1.32E+08 | KD2-H4K8ac_peak_29455 | 7.67504  |                                                    |
| 9 | 132369223 | 1.32E+08 | KD2-H4K8ac_peak_29456 | 6.25869  |                                                    |
| 9 | 132371996 | 1.32E+08 | KD2-H4K8ac_peak_29457 | 9.34195  | NTMT1_ENSG00000148335                              |
| 9 | 132373161 | 1.32E+08 | KD2-H4K8ac_peak_29458 | 7.36799  |                                                    |
| 9 | 132382042 | 1.32E+08 | KD2-H4K8ac_peak_29459 | 16.54484 | C9orf50_ENSG00000179058                            |
| 9 | 132387700 | 1.32E+08 | KD2-H4K8ac_peak_29460 | 6.05995  |                                                    |
| 9 | 132388448 | 1.32E+08 | KD2-H4K8ac_peak_29461 | 14.48084 |                                                    |
| 9 | 132402739 | 1.32E+08 | KD2-H4K8ac_peak_29462 | 9.1707   | RP11-483H20.4_ENSG00000234789                      |
| 9 | 132404000 | 1.32E+08 | KD2-H4K8ac_peak_29463 | 5.13615  | ASB6_ENSG00000148331                               |
| 9 | 132404708 | 1.32E+08 | KD2-H4K8ac_peak_29464 | 12.21163 | ASB6_ENSG00000148331                               |
| 9 | 132411557 | 1.32E+08 | KD2-H4K8ac_peak_29465 | 13.95627 |                                                    |
| 9 | 132412682 | 1.32E+08 | KD2-H4K8ac_peak_29466 | 12.82393 |                                                    |
| 9 | 132416893 | 1.32E+08 | KD2-H4K8ac_peak_29467 | 5.14125  |                                                    |
| 9 | 132427528 | 1.32E+08 | KD2-H4K8ac_peak_29468 | 15.61313 | PRRX2_ENSG00000167157                              |
| 9 | 132428569 | 1.32E+08 | KD2-H4K8ac_peak_29469 | 8.66368  | PRRX2_ENSG00000167157                              |
| 9 | 132437378 | 1.32E+08 | KD2-H4K8ac_peak_29470 | 4.06758  |                                                    |
| 9 | 132439553 | 1.32E+08 | KD2-H4K8ac_peak_29471 | 9.05418  |                                                    |
| 9 | 132459285 | 1.32E+08 | KD2-H4K8ac_peak_29472 | 10.45683 |                                                    |
| 9 | 132459855 | 1.32E+08 | KD2-H4K8ac_peak_29473 | 23.38267 |                                                    |
| 9 | 132500041 | 1.33E+08 | KD2-H4K8ac_peak_29474 | 11.50346 |                                                    |
| 9 | 132564234 | 1.33E+08 | KD2-H4K8ac_peak_29475 | 5.14125  | TOR1B_ENSG00000136816                              |
| 9 | 132586190 | 1.33E+08 | KD2-H4K8ac_peak_29476 | 13.09271 | TOR1A_ENSG00000136827                              |
| 9 | 132597807 | 1.33E+08 | KD2-H4K8ac_peak_29477 | 13.44374 | C9orf78_ENSG00000136819;USP20_ENSG00000136878      |
| 9 | 132614615 | 1.33E+08 | KD2-H4K8ac_peak_29478 | 7.01494  |                                                    |
| 9 | 132646204 | 1.33E+08 | KD2-H4K8ac_peak_29479 | 7.01494  | RP11-409K20.7_ENSG00000224988                      |
| 9 | 132646943 | 1.33E+08 | KD2-H4K8ac_peak_29480 | 10.87093 | RP11-409K20.7_ENSG00000224988                      |
| 9 | 132804834 | 1.33E+08 | KD2-H4K8ac_peak_29481 | 6.20982  | FNBP1_ENSG00000187239                              |
| 9 | 132805735 | 1.33E+08 | KD2-H4K8ac_peak_29482 | 8.86099  | FNBP1_ENSG00000187239;RP11-138E2.1_ENSG00000270755 |
| 9 | 132815229 | 1.33E+08 | KD2-H4K8ac_peak_29483 | 6.2781   | GPR107_ENSG00000148358                             |
| 9 | 132816358 | 1.33E+08 | KD2-H4K8ac_peak_29484 | 8.3261   | GPR107_ENSG00000148358                             |

|   |           |          |                       |          |                                                      |
|---|-----------|----------|-----------------------|----------|------------------------------------------------------|
| 9 | 132880981 | 1.33E+08 | KD2-H4K8ac_peak_29485 | 6.60096  |                                                      |
| 9 | 132933960 | 1.33E+08 | KD2-H4K8ac_peak_29486 | 8.55271  | NCS1_ENSG00000107130                                 |
| 9 | 132935214 | 1.33E+08 | KD2-H4K8ac_peak_29487 | 7.4599   | NCS1_ENSG00000107130                                 |
| 9 | 132954253 | 1.33E+08 | KD2-H4K8ac_peak_29488 | 8.10216  |                                                      |
| 9 | 132957354 | 1.33E+08 | KD2-H4K8ac_peak_29489 | 8.86099  |                                                      |
| 9 | 132957918 | 1.33E+08 | KD2-H4K8ac_peak_29490 | 14.03725 |                                                      |
| 9 | 132958711 | 1.33E+08 | KD2-H4K8ac_peak_29491 | 5.81222  |                                                      |
| 9 | 132959650 | 1.33E+08 | KD2-H4K8ac_peak_29492 | 11.05467 |                                                      |
| 9 | 132962754 | 1.33E+08 | KD2-H4K8ac_peak_29493 | 5.30799  |                                                      |
| 9 | 132971629 | 1.33E+08 | KD2-H4K8ac_peak_29494 | 7.96322  |                                                      |
| 9 | 132982252 | 1.33E+08 | KD2-H4K8ac_peak_29495 | 5.10505  |                                                      |
| 9 | 133002469 | 1.33E+08 | KD2-H4K8ac_peak_29496 | 5.20998  |                                                      |
| 9 | 133003307 | 1.33E+08 | KD2-H4K8ac_peak_29497 | 12.82393 |                                                      |
| 9 | 133005619 | 1.33E+08 | KD2-H4K8ac_peak_29498 | 8.52559  |                                                      |
| 9 | 133066913 | 1.33E+08 | KD2-H4K8ac_peak_29499 | 7.1181   |                                                      |
| 9 | 133274854 | 1.33E+08 | KD2-H4K8ac_peak_29500 | 12.4143  | AL354898.1_ENSG00000215428;RN7SL665P_ENSG00000264169 |
| 9 | 133294136 | 1.33E+08 | KD2-H4K8ac_peak_29501 | 4.86324  |                                                      |
| 9 | 133295651 | 1.33E+08 | KD2-H4K8ac_peak_29502 | 5.78354  |                                                      |
| 9 | 133296568 | 1.33E+08 | KD2-H4K8ac_peak_29503 | 6.25869  |                                                      |
| 9 | 133297593 | 1.33E+08 | KD2-H4K8ac_peak_29504 | 12.97788 |                                                      |
| 9 | 133299041 | 1.33E+08 | KD2-H4K8ac_peak_29505 | 5.75757  |                                                      |
| 9 | 133300001 | 1.33E+08 | KD2-H4K8ac_peak_29506 | 8.55271  |                                                      |
| 9 | 133302904 | 1.33E+08 | KD2-H4K8ac_peak_29507 | 7.40314  |                                                      |
| 9 | 133303789 | 1.33E+08 | KD2-H4K8ac_peak_29508 | 6.20282  |                                                      |
| 9 | 133307131 | 1.33E+08 | KD2-H4K8ac_peak_29509 | 7.40314  |                                                      |
| 9 | 133308592 | 1.33E+08 | KD2-H4K8ac_peak_29510 | 11.89502 |                                                      |
| 9 | 133318979 | 1.33E+08 | KD2-H4K8ac_peak_29511 | 4.211    |                                                      |
| 9 | 133319771 | 1.33E+08 | KD2-H4K8ac_peak_29512 | 8.52559  | ASS1_ENSG00000130707                                 |
| 9 | 133320885 | 1.33E+08 | KD2-H4K8ac_peak_29513 | 11.3923  | ASS1_ENSG00000130707                                 |
| 9 | 133323878 | 1.33E+08 | KD2-H4K8ac_peak_29514 | 7.76104  | snoU13_ENSG00000238298                               |
| 9 | 133324791 | 1.33E+08 | KD2-H4K8ac_peak_29515 | 10.90377 | snoU13_ENSG00000238298                               |
| 9 | 133325831 | 1.33E+08 | KD2-H4K8ac_peak_29516 | 5.85291  | snoU13_ENSG00000238298                               |
| 9 | 133326297 | 1.33E+08 | KD2-H4K8ac_peak_29517 | 9.44322  |                                                      |
| 9 | 133329231 | 1.33E+08 | KD2-H4K8ac_peak_29518 | 13.26343 |                                                      |
| 9 | 133335810 | 1.33E+08 | KD2-H4K8ac_peak_29519 | 5.57044  |                                                      |
| 9 | 133336839 | 1.33E+08 | KD2-H4K8ac_peak_29520 | 7.76329  |                                                      |
| 9 | 133376409 | 1.33E+08 | KD2-H4K8ac_peak_29521 | 3.76318  |                                                      |
| 9 | 133454541 | 1.33E+08 | KD2-H4K8ac_peak_29522 | 11.90231 | FUBP3_ENSG00000107164                                |
| 9 | 133455009 | 1.33E+08 | KD2-H4K8ac_peak_29523 | 13.73635 | FUBP3_ENSG00000107164                                |
| 9 | 133556306 | 1.34E+08 | KD2-H4K8ac_peak_29524 | 15.25814 |                                                      |
| 9 | 133565083 | 1.34E+08 | KD2-H4K8ac_peak_29525 | 8.74596  |                                                      |
| 9 | 133569257 | 1.34E+08 | KD2-H4K8ac_peak_29526 | 8.82366  | EXOSC2_ENSG00000130713                               |
| 9 | 133587474 | 1.34E+08 | KD2-H4K8ac_peak_29527 | 4.86324  |                                                      |
| 9 | 133588228 | 1.34E+08 | KD2-H4K8ac_peak_29528 | 14.15383 | ABL1_ENSG00000097007                                 |
| 9 | 133710091 | 1.34E+08 | KD2-H4K8ac_peak_29529 | 10.17341 |                                                      |
| 9 | 133710841 | 1.34E+08 | KD2-H4K8ac_peak_29530 | 14.8083  |                                                      |

|   |           |          |                       |          |                                                                              |
|---|-----------|----------|-----------------------|----------|------------------------------------------------------------------------------|
| 9 | 133912010 | 1.34E+08 | KD2-H4K8ac_peak_29531 | 8.10216  |                                                                              |
| 9 | 133972059 | 1.34E+08 | KD2-H4K8ac_peak_29532 | 6.99815  | AIFIL_ENSG00000126878                                                        |
| 9 | 134000012 | 1.34E+08 | KD2-H4K8ac_peak_29533 | 10.33529 | NUP214_ENSG00000126883                                                       |
| 9 | 134000996 | 1.34E+08 | KD2-H4K8ac_peak_29534 | 13.3695  | NUP214_ENSG00000126883                                                       |
| 9 | 134152697 | 1.34E+08 | KD2-H4K8ac_peak_29535 | 7.44324  | FAM78A_ENSG00000126882                                                       |
| 9 | 134153670 | 1.34E+08 | KD2-H4K8ac_peak_29536 | 11.89502 |                                                                              |
| 9 | 134164026 | 1.34E+08 | KD2-H4K8ac_peak_29537 | 6.13909  | PPAPDC3_ENSG00000160539                                                      |
| 9 | 134164762 | 1.34E+08 | KD2-H4K8ac_peak_29538 | 6.87217  | PPAPDC3_ENSG00000160539                                                      |
| 9 | 134165274 | 1.34E+08 | KD2-H4K8ac_peak_29539 | 8.16906  | PPAPDC3_ENSG00000160539                                                      |
| 9 | 134193642 | 1.34E+08 | KD2-H4K8ac_peak_29540 | 5.9696   |                                                                              |
| 9 | 134209084 | 1.34E+08 | KD2-H4K8ac_peak_29541 | 3.80759  |                                                                              |
| 9 | 134225020 | 1.34E+08 | KD2-H4K8ac_peak_29542 | 15.69572 |                                                                              |
| 9 | 134248082 | 1.34E+08 | KD2-H4K8ac_peak_29543 | 5.20908  |                                                                              |
| 9 | 134249823 | 1.34E+08 | KD2-H4K8ac_peak_29544 | 6.40683  |                                                                              |
| 9 | 134267980 | 1.34E+08 | KD2-H4K8ac_peak_29545 | 11.75669 |                                                                              |
| 9 | 134268536 | 1.34E+08 | KD2-H4K8ac_peak_29546 | 5.88845  | PRRC2B_ENSG00000130723                                                       |
| 9 | 134269535 | 1.34E+08 | KD2-H4K8ac_peak_29547 | 25.32841 | PRRC2B_ENSG00000130723                                                       |
| 9 | 134357144 | 1.34E+08 | KD2-H4K8ac_peak_29548 | 4.75764  |                                                                              |
| 9 | 134377801 | 1.34E+08 | KD2-H4K8ac_peak_29549 | 6.91862  | POMT1_ENSG00000130714                                                        |
| 9 | 134406773 | 1.34E+08 | KD2-H4K8ac_peak_29550 | 20.02161 | UCK1_ENSG00000130717                                                         |
| 9 | 134614744 | 1.35E+08 | KD2-H4K8ac_peak_29551 | 10.94087 | RAPGEF1_ENSG00000107263                                                      |
| 9 | 134954843 | 1.35E+08 | KD2-H4K8ac_peak_29552 | 4.86324  | MED27_ENSG00000160563                                                        |
| 9 | 135050728 | 1.35E+08 | KD2-H4K8ac_peak_29553 | 4.87807  |                                                                              |
| 9 | 135089739 | 1.35E+08 | KD2-H4K8ac_peak_29554 | 4.42765  | AL159997.1_ENSG00000221105                                                   |
| 9 | 135134360 | 1.35E+08 | KD2-H4K8ac_peak_29555 | 6.05809  |                                                                              |
| 9 | 135230056 | 1.35E+08 | KD2-H4K8ac_peak_29556 | 8.85813  | SETX_ENSG00000107290                                                         |
| 9 | 135230874 | 1.35E+08 | KD2-H4K8ac_peak_29557 | 6.0605   | SETX_ENSG00000107290                                                         |
| 9 | 135282647 | 1.35E+08 | KD2-H4K8ac_peak_29558 | 6.66692  | TTF1_ENSG00000125482                                                         |
| 9 | 135300531 | 1.35E+08 | KD2-H4K8ac_peak_29559 | 4.20044  |                                                                              |
| 9 | 135380461 | 1.35E+08 | KD2-H4K8ac_peak_29560 | 6.17833  |                                                                              |
| 9 | 135381420 | 1.35E+08 | KD2-H4K8ac_peak_29561 | 4.42765  |                                                                              |
| 9 | 135381974 | 1.35E+08 | KD2-H4K8ac_peak_29562 | 3.97079  |                                                                              |
| 9 | 135384635 | 1.35E+08 | KD2-H4K8ac_peak_29563 | 6.56211  |                                                                              |
| 9 | 135385362 | 1.35E+08 | KD2-H4K8ac_peak_29564 | 11.89502 |                                                                              |
| 9 | 135392289 | 1.35E+08 | KD2-H4K8ac_peak_29565 | 4.42765  |                                                                              |
| 9 | 135406718 | 1.35E+08 | KD2-H4K8ac_peak_29566 | 8.1233   |                                                                              |
| 9 | 135419325 | 1.35E+08 | KD2-H4K8ac_peak_29567 | 4.211    |                                                                              |
| 9 | 135420361 | 1.35E+08 | KD2-H4K8ac_peak_29568 | 11.60333 |                                                                              |
| 9 | 135421930 | 1.35E+08 | KD2-H4K8ac_peak_29569 | 15.48665 |                                                                              |
| 9 | 135545115 | 1.36E+08 | KD2-H4K8ac_peak_29570 | 6.87217  | DDX31_ENSG00000125485;GTF3C4_ENSG00000125484                                 |
| 9 | 135721369 | 1.36E+08 | KD2-H4K8ac_peak_29571 | 5.57044  |                                                                              |
| 9 | 135725232 | 1.36E+08 | KD2-H4K8ac_peak_29572 | 6.40683  |                                                                              |
| 9 | 135753775 | 1.36E+08 | KD2-H4K8ac_peak_29573 | 11.05467 | AK8_ENSG00000165695;C9orf9_ENSG00000165698                                   |
| 9 | 135819581 | 1.36E+08 | KD2-H4K8ac_peak_29574 | 26.15943 | TSC1_ENSG00000165699;GFI1B_ENSG00000165702;MIR548AW_ENSG00000263816          |
| 9 | 135821189 | 1.36E+08 | KD2-H4K8ac_peak_29575 | 4.77079  | GFI1B_ENSG00000165702;MIR548AW_ENSG00000263816;RP11-295G24.4_ENSG00000233800 |
| 9 | 135905244 | 1.36E+08 | KD2-H4K8ac_peak_29576 | 7.67504  | GTF3C5_ENSG00000148308                                                       |

|   |           |          |                       |          |                                                                     |
|---|-----------|----------|-----------------------|----------|---------------------------------------------------------------------|
| 9 | 135906163 | 1.36E+08 | KD2-H4K8ac_peak_29577 | 8.79106  | GTF3C5_ENSG00000148308                                              |
| 9 | 135993599 | 1.36E+08 | KD2-H4K8ac_peak_29578 | 7.38799  |                                                                     |
| 9 | 135994035 | 1.36E+08 | KD2-H4K8ac_peak_29579 | 11.43863 |                                                                     |
| 9 | 135995233 | 1.36E+08 | KD2-H4K8ac_peak_29580 | 16.0627  |                                                                     |
| 9 | 135995976 | 1.36E+08 | KD2-H4K8ac_peak_29581 | 10.37209 |                                                                     |
| 9 | 136019672 | 1.36E+08 | KD2-H4K8ac_peak_29582 | 4.44527  |                                                                     |
| 9 | 136024116 | 1.36E+08 | KD2-H4K8ac_peak_29583 | 12.93209 |                                                                     |
| 9 | 136024950 | 1.36E+08 | KD2-H4K8ac_peak_29584 | 7.76104  |                                                                     |
| 9 | 136039722 | 1.36E+08 | KD2-H4K8ac_peak_29585 | 6.66692  | RALGDS_ENSG00000160271;GBGT1_ENSG00000148288                        |
| 9 | 136102723 | 1.36E+08 | KD2-H4K8ac_peak_29586 | 6.2159   |                                                                     |
| 9 | 136202574 | 1.36E+08 | KD2-H4K8ac_peak_29587 | 10.0692  | SURF6_ENSG00000148296                                               |
| 9 | 136203241 | 1.36E+08 | KD2-H4K8ac_peak_29588 | 9.11031  | SURF6_ENSG00000148296                                               |
| 9 | 136214145 | 1.36E+08 | KD2-H4K8ac_peak_29589 | 8.85813  | MED22_ENSG00000148297;RPL7A_ENSG00000148303                         |
| 9 | 136215124 | 1.36E+08 | KD2-H4K8ac_peak_29590 | 10.43145 | MED22_ENSG00000148297;RPL7A_ENSG00000148303;SNORD24_ENSG00000206611 |
| 9 | 136242394 | 1.36E+08 | KD2-H4K8ac_peak_29591 | 11.60333 | SURF4_ENSG00000148248;C9orf96_ENSG00000198870                       |
| 9 | 136243285 | 1.36E+08 | KD2-H4K8ac_peak_29592 | 11.02863 | SURF4_ENSG00000148248;C9orf96_ENSG00000198870                       |
| 9 | 136282797 | 1.36E+08 | KD2-H4K8ac_peak_29593 | 19.9503  | REXO4_ENSG00000148300                                               |
| 9 | 136313826 | 1.36E+08 | KD2-H4K8ac_peak_29594 | 8.23274  |                                                                     |
| 9 | 136325155 | 1.36E+08 | KD2-H4K8ac_peak_29595 | 10.66719 | CACFD1_ENSG00000160325                                              |
| 9 | 136343825 | 1.36E+08 | KD2-H4K8ac_peak_29596 | 6.40297  | SLC2A6_ENSG00000160326                                              |
| 9 | 136349623 | 1.36E+08 | KD2-H4K8ac_peak_29597 | 5.13615  |                                                                     |
| 9 | 136351019 | 1.36E+08 | KD2-H4K8ac_peak_29598 | 9.1707   |                                                                     |
| 9 | 136351848 | 1.36E+08 | KD2-H4K8ac_peak_29599 | 8.6308   |                                                                     |
| 9 | 136352786 | 1.36E+08 | KD2-H4K8ac_peak_29600 | 9.51625  |                                                                     |
| 9 | 136357116 | 1.36E+08 | KD2-H4K8ac_peak_29601 | 6.99815  |                                                                     |
| 9 | 136370887 | 1.36E+08 | KD2-H4K8ac_peak_29602 | 3.87368  |                                                                     |
| 9 | 136371733 | 1.36E+08 | KD2-H4K8ac_peak_29603 | 4.54006  |                                                                     |
| 9 | 136374352 | 1.36E+08 | KD2-H4K8ac_peak_29604 | 20.02161 |                                                                     |
| 9 | 136377853 | 1.36E+08 | KD2-H4K8ac_peak_29605 | 23.2707  |                                                                     |
| 9 | 136379823 | 1.36E+08 | KD2-H4K8ac_peak_29606 | 23.28866 |                                                                     |
| 9 | 136386606 | 1.36E+08 | KD2-H4K8ac_peak_29607 | 4.0809   |                                                                     |
| 9 | 136387580 | 1.36E+08 | KD2-H4K8ac_peak_29608 | 9.36516  |                                                                     |
| 9 | 136389216 | 1.36E+08 | KD2-H4K8ac_peak_29609 | 7.95563  |                                                                     |
| 9 | 136391680 | 1.36E+08 | KD2-H4K8ac_peak_29610 | 9.6247   |                                                                     |
| 9 | 136392848 | 1.36E+08 | KD2-H4K8ac_peak_29611 | 9.26408  | TMEM8C_ENSG00000187616                                              |
| 9 | 136397872 | 1.36E+08 | KD2-H4K8ac_peak_29612 | 5.405    | ADAMTSL2_ENSG00000197859                                            |
| 9 | 136398444 | 1.36E+08 | KD2-H4K8ac_peak_29613 | 19.33018 |                                                                     |
| 9 | 136400503 | 1.36E+08 | KD2-H4K8ac_peak_29614 | 14.8083  |                                                                     |
| 9 | 136410441 | 1.36E+08 | KD2-H4K8ac_peak_29615 | 7.1733   |                                                                     |
| 9 | 136457860 | 1.36E+08 | KD2-H4K8ac_peak_29616 | 6.39197  |                                                                     |
| 9 | 136474100 | 1.36E+08 | KD2-H4K8ac_peak_29617 | 7.18615  |                                                                     |
| 9 | 136479740 | 1.36E+08 | KD2-H4K8ac_peak_29618 | 4.98072  |                                                                     |
| 9 | 136496361 | 1.36E+08 | KD2-H4K8ac_peak_29619 | 8.79106  |                                                                     |
| 9 | 136496946 | 1.36E+08 | KD2-H4K8ac_peak_29620 | 14.86568 | LL09NC01-254D11.1_ENSG00000261018                                   |
| 9 | 136498512 | 1.36E+08 | KD2-H4K8ac_peak_29621 | 17.46467 | LL09NC01-254D11.1_ENSG00000261018                                   |
| 9 | 136500485 | 1.37E+08 | KD2-H4K8ac_peak_29622 | 17.10757 | DBH_ENSG00000123454                                                 |



|   |           |          |                       |          |                                                       |
|---|-----------|----------|-----------------------|----------|-------------------------------------------------------|
| 9 | 136501563 | 1.37E+08 | KD2-H4K8ac_peak_29623 | 9.57101  | DBH_ENSG00000123454                                   |
| 9 | 136521952 | 1.37E+08 | KD2-H4K8ac_peak_29624 | 5.72327  | DBH-AS1_ENSG00000225756                               |
| 9 | 136527525 | 1.37E+08 | KD2-H4K8ac_peak_29625 | 6.8713   |                                                       |
| 9 | 136530844 | 1.37E+08 | KD2-H4K8ac_peak_29626 | 3.87414  |                                                       |
| 9 | 136545508 | 1.37E+08 | KD2-H4K8ac_peak_29627 | 5.23146  |                                                       |
| 9 | 136547661 | 1.37E+08 | KD2-H4K8ac_peak_29628 | 6.45706  |                                                       |
| 9 | 136548144 | 1.37E+08 | KD2-H4K8ac_peak_29629 | 9.26287  |                                                       |
| 9 | 136549023 | 1.37E+08 | KD2-H4K8ac_peak_29630 | 5.5228   |                                                       |
| 9 | 136580524 | 1.37E+08 | KD2-H4K8ac_peak_29631 | 7.146    |                                                       |
| 9 | 136581549 | 1.37E+08 | KD2-H4K8ac_peak_29632 | 4.42765  |                                                       |
| 9 | 136603657 | 1.37E+08 | KD2-H4K8ac_peak_29633 | 6.65673  |                                                       |
| 9 | 136734227 | 1.37E+08 | KD2-H4K8ac_peak_29634 | 4.98072  |                                                       |
| 9 | 136735312 | 1.37E+08 | KD2-H4K8ac_peak_29635 | 10.05606 |                                                       |
| 9 | 136738502 | 1.37E+08 | KD2-H4K8ac_peak_29636 | 10.0997  |                                                       |
| 9 | 136739671 | 1.37E+08 | KD2-H4K8ac_peak_29637 | 8.20434  |                                                       |
| 9 | 136740998 | 1.37E+08 | KD2-H4K8ac_peak_29638 | 5.13615  |                                                       |
| 9 | 136747953 | 1.37E+08 | KD2-H4K8ac_peak_29639 | 5.44526  |                                                       |
| 9 | 136753100 | 1.37E+08 | KD2-H4K8ac_peak_29640 | 5.54647  |                                                       |
| 9 | 136808147 | 1.37E+08 | KD2-H4K8ac_peak_29641 | 10.77651 |                                                       |
| 9 | 136809147 | 1.37E+08 | KD2-H4K8ac_peak_29642 | 5.01002  |                                                       |
| 9 | 136821027 | 1.37E+08 | KD2-H4K8ac_peak_29643 | 9.95119  |                                                       |
| 9 | 136821829 | 1.37E+08 | KD2-H4K8ac_peak_29644 | 8.26945  |                                                       |
| 9 | 136836244 | 1.37E+08 | KD2-H4K8ac_peak_29645 | 6.00226  |                                                       |
| 9 | 136857184 | 1.37E+08 | KD2-H4K8ac_peak_29646 | 7.36799  | VAV2_ENSG00000160293                                  |
| 9 | 136858041 | 1.37E+08 | KD2-H4K8ac_peak_29647 | 18.39704 | VAV2_ENSG00000160293                                  |
| 9 | 136932108 | 1.37E+08 | KD2-H4K8ac_peak_29648 | 7.13615  | BRD3_ENSG00000169925                                  |
| 9 | 136933383 | 1.37E+08 | KD2-H4K8ac_peak_29649 | 16.8435  | BRD3_ENSG00000169925                                  |
| 9 | 137000310 | 1.37E+08 | KD2-H4K8ac_peak_29650 | 12.30509 | LL09NC01-251B2.3_ENSG00000273249;WDR5_ENSG00000196363 |
| 9 | 137001265 | 1.37E+08 | KD2-H4K8ac_peak_29651 | 7.40111  | LL09NC01-251B2.3_ENSG00000273249;WDR5_ENSG00000196363 |
| 9 | 137028422 | 1.37E+08 | KD2-H4K8ac_peak_29652 | 9.16531  | RNU6ATAC_ENSG00000221676                              |
| 9 | 137030213 | 1.37E+08 | KD2-H4K8ac_peak_29653 | 27.9462  | RNU6ATAC_ENSG00000221676                              |
| 9 | 137184167 | 1.37E+08 | KD2-H4K8ac_peak_29654 | 13.73635 |                                                       |
| 9 | 137185801 | 1.37E+08 | KD2-H4K8ac_peak_29655 | 10.7186  | RP11-145E17.2_ENSG00000223729                         |
| 9 | 137217444 | 1.37E+08 | KD2-H4K8ac_peak_29656 | 8.58725  |                                                       |
| 9 | 137224693 | 1.37E+08 | KD2-H4K8ac_peak_29657 | 8.30974  |                                                       |
| 9 | 137230843 | 1.37E+08 | KD2-H4K8ac_peak_29658 | 3.65228  |                                                       |
| 9 | 137241173 | 1.37E+08 | KD2-H4K8ac_peak_29659 | 6.65673  |                                                       |
| 9 | 137242265 | 1.37E+08 | KD2-H4K8ac_peak_29660 | 5.9696   |                                                       |
| 9 | 137249907 | 1.37E+08 | KD2-H4K8ac_peak_29661 | 5.31717  |                                                       |
| 9 | 137257063 | 1.37E+08 | KD2-H4K8ac_peak_29662 | 6.13909  |                                                       |
| 9 | 137257553 | 1.37E+08 | KD2-H4K8ac_peak_29663 | 6.50882  |                                                       |
| 9 | 137259338 | 1.37E+08 | KD2-H4K8ac_peak_29664 | 5.61067  |                                                       |
| 9 | 137298412 | 1.37E+08 | KD2-H4K8ac_peak_29665 | 9.34989  |                                                       |
| 9 | 137327325 | 1.37E+08 | KD2-H4K8ac_peak_29666 | 12.82393 |                                                       |
| 9 | 137329321 | 1.37E+08 | KD2-H4K8ac_peak_29667 | 5.9696   |                                                       |
| 9 | 137348601 | 1.37E+08 | KD2-H4K8ac_peak_29668 | 8.55271  |                                                       |

|   |           |          |                       |          |                                                       |
|---|-----------|----------|-----------------------|----------|-------------------------------------------------------|
| 9 | 137533017 | 1.38E+08 | KD2-H4K8ac_peak_29669 | 10.11379 | COL5A1_ENSG00000130635                                |
| 9 | 137598445 | 1.38E+08 | KD2-H4K8ac_peak_29670 | 5.13615  |                                                       |
| 9 | 137599531 | 1.38E+08 | KD2-H4K8ac_peak_29671 | 9.26408  |                                                       |
| 9 | 137603024 | 1.38E+08 | KD2-H4K8ac_peak_29672 | 7.07512  |                                                       |
| 9 | 137967444 | 1.38E+08 | KD2-H4K8ac_peak_29673 | 6.25869  | OLFM1_ENSG00000130558                                 |
| 9 | 138027782 | 1.38E+08 | KD2-H4K8ac_peak_29674 | 5.34636  |                                                       |
| 9 | 138028762 | 1.38E+08 | KD2-H4K8ac_peak_29675 | 11.05467 |                                                       |
| 9 | 138038752 | 1.38E+08 | KD2-H4K8ac_peak_29676 | 4.86324  |                                                       |
| 9 | 138039171 | 1.38E+08 | KD2-H4K8ac_peak_29677 | 10.43145 |                                                       |
| 9 | 138076060 | 1.38E+08 | KD2-H4K8ac_peak_29678 | 4.77079  |                                                       |
| 9 | 138110719 | 1.38E+08 | KD2-H4K8ac_peak_29679 | 9.96941  |                                                       |
| 9 | 138114939 | 1.38E+08 | KD2-H4K8ac_peak_29680 | 7.51945  |                                                       |
| 9 | 138164561 | 1.38E+08 | KD2-H4K8ac_peak_29681 | 5.14125  |                                                       |
| 9 | 138173154 | 1.38E+08 | KD2-H4K8ac_peak_29682 | 5.75757  |                                                       |
| 9 | 138223194 | 1.38E+08 | KD2-H4K8ac_peak_29683 | 5.14125  |                                                       |
| 9 | 138370876 | 1.38E+08 | KD2-H4K8ac_peak_29684 | 13.88933 | PPP1R26_ENSG00000196422                               |
| 9 | 138371958 | 1.38E+08 | KD2-H4K8ac_peak_29685 | 7.18916  | PPP1R26-AS1_ENSG00000225361                           |
| 9 | 138392581 | 1.38E+08 | KD2-H4K8ac_peak_29686 | 7.51054  | C9orf116_ENSG00000160345;MRPS2_ENSG00000122140        |
| 9 | 138593503 | 1.39E+08 | KD2-H4K8ac_peak_29687 | 7.1181   | KCNT1_ENSG00000107147                                 |
| 9 | 138594082 | 1.39E+08 | KD2-H4K8ac_peak_29688 | 4.86324  | KCNT1_ENSG00000107147                                 |
| 9 | 138798895 | 1.39E+08 | KD2-H4K8ac_peak_29689 | 8.55271  | CAMSAP1_ENSG00000130559;RP11-432J22.2_ENSG00000238058 |
| 9 | 138854719 | 1.39E+08 | KD2-H4K8ac_peak_29690 | 6.56211  |                                                       |
| 9 | 138882870 | 1.39E+08 | KD2-H4K8ac_peak_29691 | 9.908    |                                                       |
| 9 | 138883835 | 1.39E+08 | KD2-H4K8ac_peak_29692 | 4.89359  |                                                       |
| 9 | 138884267 | 1.39E+08 | KD2-H4K8ac_peak_29693 | 16.14659 |                                                       |
| 9 | 138885818 | 1.39E+08 | KD2-H4K8ac_peak_29694 | 6.40297  |                                                       |
| 9 | 138903467 | 1.39E+08 | KD2-H4K8ac_peak_29695 | 20.7176  |                                                       |
| 9 | 138986915 | 1.39E+08 | KD2-H4K8ac_peak_29696 | 8.30114  | NACC2_ENSG00000148411                                 |
| 9 | 139001076 | 1.39E+08 | KD2-H4K8ac_peak_29697 | 9.26823  | RP11-83N9.5_ENSG00000260193                           |
| 9 | 139001765 | 1.39E+08 | KD2-H4K8ac_peak_29698 | 11.3394  | RP11-83N9.5_ENSG00000260193                           |
| 9 | 139009781 | 1.39E+08 | KD2-H4K8ac_peak_29699 | 23.13674 | C9orf69_ENSG00000238227                               |
| 9 | 139010953 | 1.39E+08 | KD2-H4K8ac_peak_29700 | 7.07117  | C9orf69_ENSG00000238227                               |
| 9 | 139137284 | 1.39E+08 | KD2-H4K8ac_peak_29701 | 6.36375  | QSOX2_ENSG00000165661                                 |
| 9 | 139159269 | 1.39E+08 | KD2-H4K8ac_peak_29702 | 17.8868  |                                                       |
| 9 | 139219891 | 1.39E+08 | KD2-H4K8ac_peak_29703 | 15.81711 | DKFZP434A062_ENSG00000267845                          |
| 9 | 139221112 | 1.39E+08 | KD2-H4K8ac_peak_29704 | 21.6161  | GPSM1_ENSG00000160360                                 |
| 9 | 139221982 | 1.39E+08 | KD2-H4K8ac_peak_29705 | 15.23486 | GPSM1_ENSG00000160360                                 |
| 9 | 139239847 | 1.39E+08 | KD2-H4K8ac_peak_29706 | 7.51005  |                                                       |
| 9 | 139254594 | 1.39E+08 | KD2-H4K8ac_peak_29707 | 5.84991  |                                                       |
| 9 | 139255185 | 1.39E+08 | KD2-H4K8ac_peak_29708 | 13.83097 |                                                       |
| 9 | 139256499 | 1.39E+08 | KD2-H4K8ac_peak_29709 | 10.19949 |                                                       |
| 9 | 139257847 | 1.39E+08 | KD2-H4K8ac_peak_29710 | 20.06347 | DNLZ_ENSG00000213221                                  |
| 9 | 139258454 | 1.39E+08 | KD2-H4K8ac_peak_29711 | 21.77956 | DNLZ_ENSG00000213221                                  |
| 9 | 139266564 | 1.39E+08 | KD2-H4K8ac_peak_29712 | 8.55271  | CARD9_ENSG00000187796                                 |
| 9 | 139267927 | 1.39E+08 | KD2-H4K8ac_peak_29713 | 8.4716   | CARD9_ENSG00000187796                                 |
| 9 | 139269707 | 1.39E+08 | KD2-H4K8ac_peak_29714 | 8.55271  |                                                       |

|   |           |          |                       |          |                                                        |
|---|-----------|----------|-----------------------|----------|--------------------------------------------------------|
| 9 | 139294200 | 1.39E+08 | KD2-H4K8ac_peak_29715 | 8.55271  | SNAPC4_ENSG00000165684                                 |
| 9 | 139294860 | 1.39E+08 | KD2-H4K8ac_peak_29716 | 16.95399 |                                                        |
| 9 | 139304004 | 1.39E+08 | KD2-H4K8ac_peak_29717 | 8.30974  | SDCCAG3_ENSG00000165689;PMPCA_ENSG00000165688          |
| 9 | 139305167 | 1.39E+08 | KD2-H4K8ac_peak_29718 | 8.55271  | SDCCAG3_ENSG00000165689;PMPCA_ENSG00000165688          |
| 9 | 139333355 | 1.39E+08 | KD2-H4K8ac_peak_29719 | 18.80827 | INPP5E_ENSG00000148384                                 |
| 9 | 139377246 | 1.39E+08 | KD2-H4K8ac_peak_29720 | 8.85813  | C9orf163_ENSG00000196366                               |
| 9 | 139378009 | 1.39E+08 | KD2-H4K8ac_peak_29721 | 17.27647 | C9orf163_ENSG00000196366                               |
| 9 | 139481458 | 1.39E+08 | KD2-H4K8ac_peak_29722 | 11.28831 |                                                        |
| 9 | 139540571 | 1.4E+08  | KD2-H4K8ac_peak_29723 | 21.09577 |                                                        |
| 9 | 139541638 | 1.4E+08  | KD2-H4K8ac_peak_29724 | 5.14125  |                                                        |
| 9 | 139549993 | 1.4E+08  | KD2-H4K8ac_peak_29725 | 8.10216  |                                                        |
| 9 | 139559444 | 1.4E+08  | KD2-H4K8ac_peak_29726 | 11.05467 |                                                        |
| 9 | 139560399 | 1.4E+08  | KD2-H4K8ac_peak_29727 | 16.88883 |                                                        |
| 9 | 139581570 | 1.4E+08  | KD2-H4K8ac_peak_29728 | 8.14467  | AGPAT2_ENSG00000169692                                 |
| 9 | 139582254 | 1.4E+08  | KD2-H4K8ac_peak_29729 | 8.55271  | AGPAT2_ENSG00000169692                                 |
| 9 | 139607035 | 1.4E+08  | KD2-H4K8ac_peak_29730 | 16.25886 | FAM69B_ENSG00000165716                                 |
| 9 | 139622756 | 1.4E+08  | KD2-H4K8ac_peak_29731 | 22.19179 | SNHG7_ENSG00000233016                                  |
| 9 | 139635688 | 1.4E+08  | KD2-H4K8ac_peak_29732 | 7.95934  |                                                        |
| 9 | 139654853 | 1.4E+08  | KD2-H4K8ac_peak_29733 | 8.74082  |                                                        |
| 9 | 139657841 | 1.4E+08  | KD2-H4K8ac_peak_29734 | 10.43145 |                                                        |
| 9 | 139664346 | 1.4E+08  | KD2-H4K8ac_peak_29735 | 10.02417 |                                                        |
| 9 | 139681947 | 1.4E+08  | KD2-H4K8ac_peak_29736 | 5.25071  |                                                        |
| 9 | 139685852 | 1.4E+08  | KD2-H4K8ac_peak_29737 | 10.96455 | TMEM141_ENSG00000244187;RP11-216L13.17_ENSG00000272896 |
| 9 | 139690613 | 1.4E+08  | KD2-H4K8ac_peak_29738 | 6.37852  | CCDC183_ENSG00000213213                                |
| 9 | 139701815 | 1.4E+08  | KD2-H4K8ac_peak_29739 | 7.81657  | RABL6_ENSG00000196642                                  |
| 9 | 139702412 | 1.4E+08  | KD2-H4K8ac_peak_29740 | 11.24702 | CCDC183-AS1_ENSG00000228544;RABL6_ENSG00000196642      |
| 9 | 139742075 | 1.4E+08  | KD2-H4K8ac_peak_29741 | 10.87093 | PHPT1_ENSG00000054148                                  |
| 9 | 139755212 | 1.4E+08  | KD2-H4K8ac_peak_29742 | 5.80056  |                                                        |
| 9 | 139760918 | 1.4E+08  | KD2-H4K8ac_peak_29743 | 26.77453 | EDF1_ENSG00000107223                                   |
| 9 | 139780412 | 1.4E+08  | KD2-H4K8ac_peak_29744 | 9.63487  | MIR4479_ENSG00000266507                                |
| 9 | 139781131 | 1.4E+08  | KD2-H4K8ac_peak_29745 | 12.00597 | MIR4479_ENSG00000266507                                |
| 9 | 139838190 | 1.4E+08  | KD2-H4K8ac_peak_29746 | 12.36441 | FBXW5_ENSG00000159069;C8G_ENSG00000176919              |
| 9 | 139839430 | 1.4E+08  | KD2-H4K8ac_peak_29747 | 7.64093  | FBXW5_ENSG00000159069;C8G_ENSG00000176919              |
| 9 | 139844633 | 1.4E+08  | KD2-H4K8ac_peak_29748 | 28.26254 | LCN12_ENSG00000184925                                  |
| 9 | 139846634 | 1.4E+08  | KD2-H4K8ac_peak_29749 | 9.68068  |                                                        |
| 9 | 139872243 | 1.4E+08  | KD2-H4K8ac_peak_29750 | 9.63487  | PTGDS_ENSG00000107317                                  |
| 9 | 139886914 | 1.4E+08  | KD2-H4K8ac_peak_29751 | 5.59859  | C9orf142_ENSG00000148362                               |
| 9 | 139921746 | 1.4E+08  | KD2-H4K8ac_peak_29752 | 13.018   | ABCA2_ENSG00000107331;C9orf139_ENSG00000180539         |
| 9 | 139922877 | 1.4E+08  | KD2-H4K8ac_peak_29753 | 17.55491 | ABCA2_ENSG00000107331;C9orf139_ENSG00000180539         |
| 9 | 139923600 | 1.4E+08  | KD2-H4K8ac_peak_29754 | 7.20567  | ABCA2_ENSG00000107331                                  |
| 9 | 139940157 | 1.4E+08  | KD2-H4K8ac_peak_29755 | 8.85813  | NPDC1_ENSG00000107281                                  |
| 9 | 139948615 | 1.4E+08  | KD2-H4K8ac_peak_29756 | 17.42905 | ENTPD2_ENSG00000054179                                 |
| 9 | 139958291 | 1.4E+08  | KD2-H4K8ac_peak_29757 | 7.146    | RP11-229P13.23_ENSG00000231864                         |
| 9 | 139965252 | 1.4E+08  | KD2-H4K8ac_peak_29758 | 26.00609 | SAPCD2_ENSG00000186193                                 |
| 9 | 139971172 | 1.4E+08  | KD2-H4K8ac_peak_29759 | 12.82393 | UAP1L1_ENSG00000197355                                 |
| 9 | 139971933 | 1.4E+08  | KD2-H4K8ac_peak_29760 | 9.96798  | UAP1L1_ENSG00000197355                                 |

|      |           |          |                       |          |                                                   |
|------|-----------|----------|-----------------------|----------|---------------------------------------------------|
| 9    | 139980648 | 1.4E+08  | KD2-H4K8ac_peak_29761 | 16.18205 | AL807752.1_ENSG00000268996;MAN1B1_ENSG00000177239 |
| 9    | 139981484 | 1.4E+08  | KD2-H4K8ac_peak_29762 | 9.07715  | AL807752.1_ENSG00000268996;MAN1B1_ENSG00000177239 |
| 9    | 140008750 | 1.4E+08  | KD2-H4K8ac_peak_29763 | 8.79106  | DPP7_ENSG00000176978                              |
| 9    | 140009248 | 1.4E+08  | KD2-H4K8ac_peak_29764 | 12.27736 | DPP7_ENSG00000176978                              |
| 9    | 140023694 | 1.4E+08  | KD2-H4K8ac_peak_29765 | 9.63487  |                                                   |
| 9    | 140024364 | 1.4E+08  | KD2-H4K8ac_peak_29766 | 10.73134 |                                                   |
| 9    | 140032829 | 1.4E+08  | KD2-H4K8ac_peak_29767 | 11.89502 | GRIN1_ENSG00000176884                             |
| 9    | 140079276 | 1.4E+08  | KD2-H4K8ac_peak_29768 | 6.65673  |                                                   |
| 9    | 140082484 | 1.4E+08  | KD2-H4K8ac_peak_29769 | 15.36189 | ANAPC2_ENSG00000176248;SSNA1_ENSG00000176101      |
| 9    | 140099690 | 1.4E+08  | KD2-H4K8ac_peak_29770 | 10.7186  | TMEM203_ENSG00000187713;NDOR1_ENSG00000188566     |
| 9    | 140115962 | 1.4E+08  | KD2-H4K8ac_peak_29771 | 12.25441 | RNF208_ENSG00000212864                            |
| 9    | 140116861 | 1.4E+08  | KD2-H4K8ac_peak_29772 | 6.99815  | RNF208_ENSG00000212864                            |
| 9    | 140117490 | 1.4E+08  | KD2-H4K8ac_peak_29773 | 12.00273 |                                                   |
| 9    | 140118213 | 1.4E+08  | KD2-H4K8ac_peak_29774 | 10.05606 | C9orf169_ENSG00000197191                          |
| 9    | 140134686 | 1.4E+08  | KD2-H4K8ac_peak_29775 | 13.80019 | TUBB4B_ENSG00000188229                            |
| 9    | 140149042 | 1.4E+08  | KD2-H4K8ac_peak_29776 | 16.15695 | NELFB_ENSG00000188986                             |
| 9    | 140175005 | 1.4E+08  | KD2-H4K8ac_peak_29777 | 13.50024 |                                                   |
| 9    | 140190019 | 1.4E+08  | KD2-H4K8ac_peak_29778 | 8.53092  | RP13-122B23.8_ENSG00000260996                     |
| 9    | 140196961 | 1.4E+08  | KD2-H4K8ac_peak_29779 | 17.55491 | NRARP_ENSG00000198435                             |
| 9    | 140209641 | 1.4E+08  | KD2-H4K8ac_peak_29780 | 12.22449 |                                                   |
| 9    | 140210628 | 1.4E+08  | KD2-H4K8ac_peak_29781 | 17.8868  |                                                   |
| 9    | 140301412 | 1.4E+08  | KD2-H4K8ac_peak_29782 | 7.6718   |                                                   |
| 9    | 140317105 | 1.4E+08  | KD2-H4K8ac_peak_29783 | 10.17341 | EXD3_ENSG00000187609;NOXA1_ENSG00000188747        |
| 9    | 140317917 | 1.4E+08  | KD2-H4K8ac_peak_29784 | 9.90914  | EXD3_ENSG00000187609;NOXA1_ENSG00000188747        |
| 9    | 140348794 | 1.4E+08  | KD2-H4K8ac_peak_29785 | 5.9696   |                                                   |
| 9    | 140349867 | 1.4E+08  | KD2-H4K8ac_peak_29786 | 5.9696   |                                                   |
| 9    | 140353478 | 1.4E+08  | KD2-H4K8ac_peak_29787 | 8.63879  | NSMF_ENSG00000165802                              |
| 9    | 140353985 | 1.4E+08  | KD2-H4K8ac_peak_29788 | 13.12288 | NSMF_ENSG00000165802                              |
| 9    | 140374809 | 1.4E+08  | KD2-H4K8ac_peak_29789 | 7.95563  |                                                   |
| 9    | 140375488 | 1.4E+08  | KD2-H4K8ac_peak_29790 | 5.23279  |                                                   |
| 9    | 140446422 | 1.4E+08  | KD2-H4K8ac_peak_29791 | 8.02571  | MRPL41_ENSG00000182154                            |
| 9    | 140473091 | 1.4E+08  | KD2-H4K8ac_peak_29792 | 12.3187  | DPH7_ENSG00000148399                              |
| 9    | 140500194 | 1.41E+08 | KD2-H4K8ac_peak_29793 | 7.07117  | ARRDC1_ENSG00000197070                            |
| 9    | 140512701 | 1.41E+08 | KD2-H4K8ac_peak_29794 | 15.61313 | C9orf37_ENSG00000203993;EHMT1_ENSG00000181090     |
| 9    | 140634307 | 1.41E+08 | KD2-H4K8ac_peak_29795 | 4.42765  |                                                   |
| 9    | 140771618 | 1.41E+08 | KD2-H4K8ac_peak_29796 | 15.69572 | CACNA1B_ENSG00000148408                           |
| 9    | 140772295 | 1.41E+08 | KD2-H4K8ac_peak_29797 | 9.36516  | CACNA1B_ENSG00000148408                           |
| 9    | 140851426 | 1.41E+08 | KD2-H4K8ac_peak_29798 | 4.77079  |                                                   |
| 9    | 140907668 | 1.41E+08 | KD2-H4K8ac_peak_29799 | 4.12757  |                                                   |
| 9    | 140938473 | 1.41E+08 | KD2-H4K8ac_peak_29800 | 4.70388  |                                                   |
| 9    | 141044476 | 1.41E+08 | KD2-H4K8ac_peak_29801 | 5.57044  | TUBBP5_ENSG00000159247                            |
| 001' | 545020    | 545361   | KD2-H4K8ac_peak_29802 | 16.67374 |                                                   |
| 001' | 114627    | 115057   | KD2-H4K8ac_peak_29803 | 24.02151 |                                                   |
| 001' | 115517    | 115737   | KD2-H4K8ac_peak_29804 | 9.11031  |                                                   |
| 001' | 30050     | 30604    | KD2-H4K8ac_peak_29805 | 20.26465 |                                                   |
| 001' | 30934     | 31214    | KD2-H4K8ac_peak_29806 | 22.79407 |                                                   |

|       |         |         |                       |          |                         |
|-------|---------|---------|-----------------------|----------|-------------------------|
| 0001' | 31503   | 32446   | KD2-H4K8ac_peak_29807 | 36.65577 |                         |
| 0001' | 33008   | 34086   | KD2-H4K8ac_peak_29808 | 15.69362 |                         |
| 0001' | 34294   | 34504   | KD2-H4K8ac_peak_29809 | 8.00897  |                         |
| 0001' | 74421   | 74944   | KD2-H4K8ac_peak_29810 | 12.07608 |                         |
| 0001' | 86267   | 86620   | KD2-H4K8ac_peak_29811 | 13.10368 |                         |
| 0001' | 86913   | 87579   | KD2-H4K8ac_peak_29812 | 19.35133 |                         |
| 0001' | 94702   | 94922   | KD2-H4K8ac_peak_29813 | 5.81188  |                         |
| 0001' | 102555  | 102947  | KD2-H4K8ac_peak_29814 | 8.3261   |                         |
| 0001' | 137487  | 137732  | KD2-H4K8ac_peak_29815 | 10.05606 |                         |
| 0001' | 138024  | 138572  | KD2-H4K8ac_peak_29816 | 16.58186 |                         |
| 0002' | 7156    | 7729    | KD2-H4K8ac_peak_29817 | 7.27716  |                         |
| 0002' | 23606   | 24267   | KD2-H4K8ac_peak_29818 | 8.1233   |                         |
| 0002' | 33184   | 33610   | KD2-H4K8ac_peak_29819 | 14.27217 |                         |
| 0002' | 84036   | 85142   | KD2-H4K8ac_peak_29820 | 6.96251  |                         |
| 0002' | 85688   | 86208   | KD2-H4K8ac_peak_29821 | 46.92315 |                         |
| 0002' | 86677   | 87261   | KD2-H4K8ac_peak_29822 | 51.25304 |                         |
| 0002' | 87817   | 88401   | KD2-H4K8ac_peak_29823 | 26.17255 |                         |
| 0002' | 110096  | 111930  | KD2-H4K8ac_peak_29824 | 47.99838 |                         |
| 0002  | 47207   | 48073   | KD2-H4K8ac_peak_29825 | 12.88108 |                         |
| 0002  | 48556   | 48797   | KD2-H4K8ac_peak_29826 | 15.13261 |                         |
| 0002  | 86862   | 87060   | KD2-H4K8ac_peak_29827 | 7.27716  |                         |
| 0002  | 28828   | 29310   | KD2-H4K8ac_peak_29828 | 9.64641  |                         |
| 0002  | 29702   | 31215   | KD2-H4K8ac_peak_29829 | 30.91169 |                         |
| 0002  | 41284   | 42298   | KD2-H4K8ac_peak_29830 | 13.95627 |                         |
| 0002  | 44403   | 44961   | KD2-H4K8ac_peak_29831 | 8.80432  |                         |
| 0002  | 45176   | 45947   | KD2-H4K8ac_peak_29832 | 14.43794 |                         |
| 0002  | 99184   | 99532   | KD2-H4K8ac_peak_29833 | 8.93954  |                         |
| 0002  | 99770   | 100488  | KD2-H4K8ac_peak_29834 | 66.5689  |                         |
| 0002' | 6473    | 7219    | KD2-H4K8ac_peak_29835 | 27.10025 |                         |
| 0002' | 7449    | 7704    | KD2-H4K8ac_peak_29836 | 12.08066 |                         |
| 0002' | 7927    | 8266    | KD2-H4K8ac_peak_29837 | 13.86895 |                         |
| 0002' | 30963   | 31612   | KD2-H4K8ac_peak_29838 | 19.97412 |                         |
| 0002' | 52459   | 52737   | KD2-H4K8ac_peak_29839 | 7.43611  |                         |
| 0002' | 37266   | 37460   | KD2-H4K8ac_peak_29840 | 5.30799  |                         |
| X     | 64515   | 64845   | KD2-H4K8ac_peak_29841 | 6.99815  |                         |
| X     | 193360  | 193798  | KD2-H4K8ac_peak_29842 | 7.27716  | PLCXD1_ENSG00000182378  |
| X     | 197834  | 198356  | KD2-H4K8ac_peak_29843 | 6.16888  |                         |
| X     | 347214  | 348393  | KD2-H4K8ac_peak_29844 | 13.1258  | PPP2R3B_ENSG00000167393 |
| X     | 1510701 | 1510947 | KD2-H4K8ac_peak_29845 | 21.6161  | SLC25A6_ENSG00000169100 |
| X     | 1511305 | 1511804 | KD2-H4K8ac_peak_29846 | 21.11201 | SLC25A6_ENSG00000169100 |
| X     | 2171013 | 2171307 | KD2-H4K8ac_peak_29847 | 6.66692  |                         |
| X     | 2417932 | 2418626 | KD2-H4K8ac_peak_29848 | 16.57619 | ZBED1_ENSG00000214717   |
| X     | 2418819 | 2419124 | KD2-H4K8ac_peak_29849 | 15.81711 | ZBED1_ENSG00000214717   |
| X     | 2419629 | 2419836 | KD2-H4K8ac_peak_29850 | 4.77079  | ZBED1_ENSG00000214717   |
| X     | 2526654 | 2527151 | KD2-H4K8ac_peak_29851 | 8.02571  | CD99P1_ENSG00000223773  |
| X     | 2609368 | 2609627 | KD2-H4K8ac_peak_29852 | 5.57044  | CD99_ENSG00000002586    |

|   |          |          |                       |          |                                                   |
|---|----------|----------|-----------------------|----------|---------------------------------------------------|
| X | 2845828  | 2846205  | KD2-H4K8ac_peak_29853 | 4.70388  |                                                   |
| X | 2847062  | 2847364  | KD2-H4K8ac_peak_29854 | 14.48084 | ARSD_ENSG00000006756                              |
| X | 3731956  | 3732252  | KD2-H4K8ac_peak_29855 | 4.01115  |                                                   |
| X | 3733284  | 3734392  | KD2-H4K8ac_peak_29856 | 21.54396 |                                                   |
| X | 7065507  | 7066107  | KD2-H4K8ac_peak_29857 | 9.15069  | HDHD1_ENSG00000130021;MIR4767_ENSG000000264268    |
| X | 7066394  | 7066709  | KD2-H4K8ac_peak_29858 | 8.10216  | HDHD1_ENSG00000130021;MIR4767_ENSG000000264268    |
| X | 9309360  | 9309778  | KD2-H4K8ac_peak_29859 | 3.75035  |                                                   |
| X | 11129468 | 11129832 | KD2-H4K8ac_peak_29860 | 10.96455 | RP11-120D5.1_ENSG00000234129;HCCS_ENSG00000004961 |
| X | 11775911 | 11776129 | KD2-H4K8ac_peak_29861 | 4.42765  | MSL3_ENSG00000005302                              |
| X | 11776836 | 11777388 | KD2-H4K8ac_peak_29862 | 4.42765  | MSL3_ENSG00000005302                              |
| X | 13670713 | 13671050 | KD2-H4K8ac_peak_29863 | 6.9809   | TCEANC_ENSG00000176896                            |
| X | 13707279 | 13707874 | KD2-H4K8ac_peak_29864 | 11.75669 | RAB9A_ENSG00000123595                             |
| X | 13752967 | 13753241 | KD2-H4K8ac_peak_29865 | 9.65086  | TRAPPC2_ENSG00000196459;OFD1_ENSG00000046651      |
| X | 14047525 | 14047885 | KD2-H4K8ac_peak_29866 | 5.9696   | GEMIN8_ENSG00000046647                            |
| X | 15429500 | 15429741 | KD2-H4K8ac_peak_29867 | 4.77079  |                                                   |
| X | 15435932 | 15436152 | KD2-H4K8ac_peak_29868 | 6.16888  |                                                   |
| X | 15437792 | 15438211 | KD2-H4K8ac_peak_29869 | 8.17902  |                                                   |
| X | 15474720 | 15474912 | KD2-H4K8ac_peak_29870 | 5.90098  |                                                   |
| X | 15484584 | 15484931 | KD2-H4K8ac_peak_29871 | 9.82729  |                                                   |
| X | 15693049 | 15693288 | KD2-H4K8ac_peak_29872 | 8.10216  | CA5BP1_ENSG00000186312                            |
| X | 15693589 | 15694063 | KD2-H4K8ac_peak_29873 | 12.08081 | CA5BP1_ENSG00000186312                            |
| X | 15808094 | 15808406 | KD2-H4K8ac_peak_29874 | 8.17902  | ZRSR2_ENSG00000169249                             |
| X | 15808651 | 15808846 | KD2-H4K8ac_peak_29875 | 10.94087 | ZRSR2_ENSG00000169249                             |
| X | 15872496 | 15872699 | KD2-H4K8ac_peak_29876 | 9.11031  | AP1S2_ENSG00000182287                             |
| X | 16730307 | 16730779 | KD2-H4K8ac_peak_29877 | 10.0692  | CTPS2_ENSG00000047230                             |
| X | 16737250 | 16737551 | KD2-H4K8ac_peak_29878 | 10.0746  | SYAP1_ENSG00000169895                             |
| X | 16737787 | 16738138 | KD2-H4K8ac_peak_29879 | 16.61426 | SYAP1_ENSG00000169895                             |
| X | 16889006 | 16889542 | KD2-H4K8ac_peak_29880 | 11.05407 | RBBP7_ENSG00000102054                             |
| X | 17549717 | 17549998 | KD2-H4K8ac_peak_29881 | 8.66387  |                                                   |
| X | 17602352 | 17602603 | KD2-H4K8ac_peak_29882 | 7.29264  |                                                   |
| X | 18373004 | 18373421 | KD2-H4K8ac_peak_29883 | 9.08816  | SCML2_ENSG00000102098                             |
| X | 18670499 | 18670764 | KD2-H4K8ac_peak_29884 | 6.31143  |                                                   |
| X | 18692636 | 18692942 | KD2-H4K8ac_peak_29885 | 6.16888  |                                                   |
| X | 18693224 | 18693857 | KD2-H4K8ac_peak_29886 | 12.82393 | PPEF1_ENSG00000086717                             |
| X | 18780745 | 18780942 | KD2-H4K8ac_peak_29887 | 7.01964  |                                                   |
| X | 18782098 | 18782521 | KD2-H4K8ac_peak_29888 | 7.12754  |                                                   |
| X | 18786823 | 18787231 | KD2-H4K8ac_peak_29889 | 6.31143  |                                                   |
| X | 18890364 | 18890795 | KD2-H4K8ac_peak_29890 | 10.0692  |                                                   |
| X | 18891535 | 18891821 | KD2-H4K8ac_peak_29891 | 4.77079  |                                                   |
| X | 19002367 | 19002589 | KD2-H4K8ac_peak_29892 | 4.0809   | PHKA2_ENSG00000044446                             |
| X | 19002898 | 19003091 | KD2-H4K8ac_peak_29893 | 6.40297  | PHKA2_ENSG00000044446                             |
| X | 19533027 | 19533339 | KD2-H4K8ac_peak_29894 | 5.25071  | MAP3K15_ENSG00000180815                           |
| X | 19906248 | 19906535 | KD2-H4K8ac_peak_29895 | 8.00457  | SH3KBP1_ENSG00000147010                           |
| X | 20134209 | 20134791 | KD2-H4K8ac_peak_29896 | 7.76329  | MAP7D2_ENSG00000184368                            |
| X | 20160300 | 20160917 | KD2-H4K8ac_peak_29897 | 14.74047 | EIF1AX_ENSG00000173674                            |
| X | 20285341 | 20285563 | KD2-H4K8ac_peak_29898 | 6.20982  | RPS6KA3_ENSG00000177189                           |

|   |          |          |                       |          |                                             |
|---|----------|----------|-----------------------|----------|---------------------------------------------|
| X | 20286020 | 20286381 | KD2-H4K8ac_peak_29899 | 6.31143  | RPS6KA3_ENSG00000177189                     |
| X | 21392007 | 21392208 | KD2-H4K8ac_peak_29900 | 5.54647  | CNKSR2_ENSG00000149970                      |
| X | 21857739 | 21858148 | KD2-H4K8ac_peak_29901 | 12.82393 | MBTPS2_ENSG00000012174                      |
| X | 21959033 | 21959394 | KD2-H4K8ac_peak_29902 | 10.08707 | SMS_ENSG00000102172                         |
| X | 23685831 | 23686056 | KD2-H4K8ac_peak_29903 | 7.27716  |                                             |
| X | 24043874 | 24044128 | KD2-H4K8ac_peak_29904 | 8.94469  |                                             |
| X | 24072874 | 24073328 | KD2-H4K8ac_peak_29905 | 6.05809  | EIF2S3_ENSG00000130741                      |
| X | 24167099 | 24168130 | KD2-H4K8ac_peak_29906 | 15.25814 | ZFX-AS1_ENSG00000234230;ZFX_ENSG00000005889 |
| X | 24168610 | 24168815 | KD2-H4K8ac_peak_29907 | 8.10216  | ZFX-AS1_ENSG00000234230                     |
| X | 24712068 | 24712303 | KD2-H4K8ac_peak_29908 | 5.57044  | POLA1_ENSG00000101868                       |
| X | 31284666 | 31284966 | KD2-H4K8ac_peak_29909 | 9.11031  |                                             |
| X | 37544819 | 37545363 | KD2-H4K8ac_peak_29910 | 10.05606 | XK_ENSG00000047597                          |
| X | 37765108 | 37765446 | KD2-H4K8ac_peak_29911 | 4.42765  | AL121578.2_ENSG00000259977                  |
| X | 38420226 | 38420474 | KD2-H4K8ac_peak_29912 | 9.15329  | TSPAN7_ENSG00000156298                      |
| X | 38662666 | 38662951 | KD2-H4K8ac_peak_29913 | 6.24747  | MID1IP1-AS1_ENSG00000238123                 |
| X | 38663801 | 38664124 | KD2-H4K8ac_peak_29914 | 4.01115  | MID1IP1-AS1_ENSG00000238123                 |
| X | 38664953 | 38665171 | KD2-H4K8ac_peak_29915 | 9.11031  |                                             |
| X | 39375589 | 39375838 | KD2-H4K8ac_peak_29916 | 8.17902  |                                             |
| X | 39376288 | 39376518 | KD2-H4K8ac_peak_29917 | 5.15777  |                                             |
| X | 39377821 | 39378515 | KD2-H4K8ac_peak_29918 | 9.11031  |                                             |
| X | 39546821 | 39547035 | KD2-H4K8ac_peak_29919 | 5.14125  |                                             |
| X | 39547771 | 39548072 | KD2-H4K8ac_peak_29920 | 4.06758  |                                             |
| X | 39548322 | 39548574 | KD2-H4K8ac_peak_29921 | 11.05407 |                                             |
| X | 39575003 | 39575907 | KD2-H4K8ac_peak_29922 | 9.15069  |                                             |
| X | 39587045 | 39587240 | KD2-H4K8ac_peak_29923 | 4.42765  |                                             |
| X | 39589763 | 39590085 | KD2-H4K8ac_peak_29924 | 8.30974  |                                             |
| X | 39595662 | 39595863 | KD2-H4K8ac_peak_29925 | 5.29555  |                                             |
| X | 39672526 | 39672721 | KD2-H4K8ac_peak_29926 | 5.61377  |                                             |
| X | 39673026 | 39673248 | KD2-H4K8ac_peak_29927 | 6.00226  |                                             |
| X | 39679803 | 39680303 | KD2-H4K8ac_peak_29928 | 5.88845  |                                             |
| X | 39797100 | 39797444 | KD2-H4K8ac_peak_29929 | 6.79289  |                                             |
| X | 39808086 | 39808475 | KD2-H4K8ac_peak_29930 | 9.36516  |                                             |
| X | 39867603 | 39867977 | KD2-H4K8ac_peak_29931 | 6.13909  | AC092198.1_ENSG00000223486                  |
| X | 39868744 | 39869067 | KD2-H4K8ac_peak_29932 | 13.81781 | AC092198.1_ENSG00000223486                  |
| X | 39872879 | 39873449 | KD2-H4K8ac_peak_29933 | 7.40314  |                                             |
| X | 39965977 | 39966294 | KD2-H4K8ac_peak_29934 | 6.69844  |                                             |
| X | 39967834 | 39968235 | KD2-H4K8ac_peak_29935 | 5.14125  |                                             |
| X | 39968520 | 39969070 | KD2-H4K8ac_peak_29936 | 5.51783  |                                             |
| X | 40004462 | 40005147 | KD2-H4K8ac_peak_29937 | 9.1707   |                                             |
| X | 40005385 | 40005858 | KD2-H4K8ac_peak_29938 | 6.97919  |                                             |
| X | 40011147 | 40011979 | KD2-H4K8ac_peak_29939 | 5.14125  |                                             |
| X | 40012191 | 40013052 | KD2-H4K8ac_peak_29940 | 7.07117  |                                             |
| X | 40014573 | 40014874 | KD2-H4K8ac_peak_29941 | 10.78136 |                                             |
| X | 40027222 | 40027936 | KD2-H4K8ac_peak_29942 | 6.94954  |                                             |
| X | 40028212 | 40028479 | KD2-H4K8ac_peak_29943 | 5.29352  |                                             |
| X | 40035475 | 40035948 | KD2-H4K8ac_peak_29944 | 14.43704 | BCOR_ENSG00000183337                        |

|   |          |          |                       |          |                                               |
|---|----------|----------|-----------------------|----------|-----------------------------------------------|
| X | 40107149 | 40107600 | KD2-H4K8ac_peak_29945 | 7.59643  |                                               |
| X | 40126565 | 40127097 | KD2-H4K8ac_peak_29946 | 3.90565  |                                               |
| X | 40275357 | 40275564 | KD2-H4K8ac_peak_29947 | 7.44366  |                                               |
| X | 40293730 | 40293923 | KD2-H4K8ac_peak_29948 | 6.00243  |                                               |
| X | 40304120 | 40305053 | KD2-H4K8ac_peak_29949 | 6.40683  |                                               |
| X | 40409146 | 40409355 | KD2-H4K8ac_peak_29950 | 7.47462  |                                               |
| X | 40440263 | 40440539 | KD2-H4K8ac_peak_29951 | 7.47462  | ATP6AP2_ENSG00000182220                       |
| X | 40944165 | 40944376 | KD2-H4K8ac_peak_29952 | 12.93209 | USP9X_ENSG00000124486                         |
| X | 41135051 | 41135506 | KD2-H4K8ac_peak_29953 | 7.36799  | RP5-1172N10.2_ENSG00000223714                 |
| X | 41191975 | 41192538 | KD2-H4K8ac_peak_29954 | 25.71759 | DDX3X_ENSG00000215301                         |
| X | 41192802 | 41194232 | KD2-H4K8ac_peak_29955 | 13.9234  | DDX3X_ENSG00000215301                         |
| X | 43515486 | 43515742 | KD2-H4K8ac_peak_29956 | 8.30974  | MAOA_ENSG00000189221                          |
| X | 44401429 | 44402082 | KD2-H4K8ac_peak_29957 | 7.76329  | FUNDC1_ENSG00000069509                        |
| X | 44402387 | 44402912 | KD2-H4K8ac_peak_29958 | 9.59147  | FUNDC1_ENSG00000069509                        |
| X | 44731594 | 44732103 | KD2-H4K8ac_peak_29959 | 24.85162 | KDM6A_ENSG00000147050                         |
| X | 46772075 | 46772411 | KD2-H4K8ac_peak_29960 | 8.30974  | JADE3_ENSG00000102221                         |
| X | 47053246 | 47053643 | KD2-H4K8ac_peak_29961 | 16.57619 |                                               |
| X | 47092119 | 47092572 | KD2-H4K8ac_peak_29962 | 4.06758  | USP11_ENSG00000102226                         |
| X | 47222022 | 47222286 | KD2-H4K8ac_peak_29963 | 8.17902  |                                               |
| X | 47342384 | 47342650 | KD2-H4K8ac_peak_29964 | 11.2938  | ZNF41_ENSG00000147124;CXorf24_ENSG00000196741 |
| X | 47373674 | 47373879 | KD2-H4K8ac_peak_29965 | 5.25071  | NUS1P1_ENSG00000235636                        |
| X | 47383111 | 47383326 | KD2-H4K8ac_peak_29966 | 7.51054  |                                               |
| X | 47420089 | 47420331 | KD2-H4K8ac_peak_29967 | 7.12754  | ARAF_ENSG00000078061                          |
| X | 47420604 | 47421089 | KD2-H4K8ac_peak_29968 | 17.14886 | ARAF_ENSG00000078061                          |
| X | 47862900 | 47863309 | KD2-H4K8ac_peak_29969 | 5.75452  | ZNF182_ENSG00000147118;SPACA5_ENSG00000171489 |
| X | 47930539 | 47931214 | KD2-H4K8ac_peak_29970 | 8.30974  | ZNF630_ENSG00000221994                        |
| X | 48334452 | 48334895 | KD2-H4K8ac_peak_29971 | 7.01964  | FTSJ1_ENSG00000068438                         |
| X | 48379584 | 48379837 | KD2-H4K8ac_peak_29972 | 4.76709  | EBP_ENSG00000147155                           |
| X | 48456084 | 48456358 | KD2-H4K8ac_peak_29973 | 6.60096  |                                               |
| X | 48535067 | 48535475 | KD2-H4K8ac_peak_29974 | 7.79558  | WAS_ENSG00000015285                           |
| X | 48555655 | 48555907 | KD2-H4K8ac_peak_29975 | 7.72801  |                                               |
| X | 48595905 | 48596572 | KD2-H4K8ac_peak_29976 | 8.1718   | AF196970.3_ENSG00000232828                    |
| X | 48597191 | 48597499 | KD2-H4K8ac_peak_29977 | 5.57044  |                                               |
| X | 48659099 | 48659317 | KD2-H4K8ac_peak_29978 | 6.9809   | HDAC6_ENSG00000094631                         |
| X | 48659730 | 48659975 | KD2-H4K8ac_peak_29979 | 11.2938  | HDAC6_ENSG00000094631                         |
| X | 48661077 | 48661298 | KD2-H4K8ac_peak_29980 | 8.5781   |                                               |
| X | 48754679 | 48754955 | KD2-H4K8ac_peak_29981 | 7.59643  | TIMM17B_ENSG00000126768;PQBPI_ENSG00000102103 |
| X | 48769134 | 48769326 | KD2-H4K8ac_peak_29982 | 6.8836   | SLC35A2_ENSG00000102100                       |
| X | 48814770 | 48814970 | KD2-H4K8ac_peak_29983 | 4.86324  | OTUD5_ENSG00000068308                         |
| X | 48828307 | 48828564 | KD2-H4K8ac_peak_29984 | 8.25022  | KCND1_ENSG00000102057                         |
| X | 48858490 | 48858852 | KD2-H4K8ac_peak_29985 | 5.88845  | GRIPAP1_ENSG00000068400                       |
| X | 48900492 | 48900794 | KD2-H4K8ac_peak_29986 | 11.05467 | TFE3_ENSG00000068323                          |
| X | 48937151 | 48937411 | KD2-H4K8ac_peak_29987 | 4.42765  | AF196779.12_ENSG00000250232                   |
| X | 48937684 | 48937988 | KD2-H4K8ac_peak_29988 | 7.76329  | AF196779.12_ENSG00000250232                   |
| X | 48979730 | 48979948 | KD2-H4K8ac_peak_29989 | 8.23274  | GPKOW_ENSG00000068394                         |
| X | 49012376 | 49012628 | KD2-H4K8ac_peak_29990 | 9.1707   |                                               |



|   |          |          |                       |          |                                                           |
|---|----------|----------|-----------------------|----------|-----------------------------------------------------------|
| X | 49028402 | 49028645 | KD2-H4K8ac_peak_29991 | 7.47462  | PLP2_ENSG00000102007                                      |
| X | 49046838 | 49047269 | KD2-H4K8ac_peak_29992 | 8.37231  |                                                           |
| X | 49047955 | 49048211 | KD2-H4K8ac_peak_29993 | 10.0692  |                                                           |
| X | 49091878 | 49092121 | KD2-H4K8ac_peak_29994 | 6.65673  | HSPB1P2_ENSG00000230216;CCDC22_ENSG00000101997            |
| X | 49125265 | 49125477 | KD2-H4K8ac_peak_29995 | 8.30974  | PPP1R3F_ENSG00000049769                                   |
| X | 49126362 | 49126978 | KD2-H4K8ac_peak_29996 | 8.30974  | PPP1R3F_ENSG00000049769                                   |
| X | 49642958 | 49643391 | KD2-H4K8ac_peak_29997 | 5.57044  | USP27X-AS1_ENSG00000234390                                |
| X | 51139022 | 51139403 | KD2-H4K8ac_peak_29998 | 12.25733 | RP11-348F1.3_ENSG00000229151;RP11-348F1.2_ENSG00000226530 |
| X | 52005100 | 52005592 | KD2-H4K8ac_peak_29999 | 10.7186  |                                                           |
| X | 52949371 | 52949956 | KD2-H4K8ac_peak_30000 | 8.17902  |                                                           |
| X | 52964536 | 52964799 | KD2-H4K8ac_peak_30001 | 9.11031  |                                                           |
| X | 53025257 | 53025533 | KD2-H4K8ac_peak_30002 | 9.11031  | FAM156A_ENSG00000182646                                   |
| X | 53077136 | 53077480 | KD2-H4K8ac_peak_30003 | 10.0692  | GPR173_ENSG00000184194                                    |
| X | 53253826 | 53254344 | KD2-H4K8ac_peak_30004 | 11.92978 | KDM5C_ENSG00000126012                                     |
| X | 53310500 | 53310923 | KD2-H4K8ac_peak_30005 | 5.73839  |                                                           |
| X | 53449014 | 53449324 | KD2-H4K8ac_peak_30006 | 6.56211  | SMC1A_ENSG00000072501;RIBC1_ENSG00000158423               |
| X | 53460670 | 53460925 | KD2-H4K8ac_peak_30007 | 8.17902  | RP3-339A18.6_ENSG00000233250;HSD17B10_ENSG00000072506     |
| X | 53461557 | 53461873 | KD2-H4K8ac_peak_30008 | 12.3187  | HSD17B10_ENSG00000072506                                  |
| X | 53468995 | 53469434 | KD2-H4K8ac_peak_30009 | 4.211    |                                                           |
| X | 54209211 | 54209592 | KD2-H4K8ac_peak_30010 | 13.9234  | FAM120C_ENSG00000184083                                   |
| X | 54384997 | 54385299 | KD2-H4K8ac_peak_30011 | 6.64891  | WNK3_ENSG00000196632                                      |
| X | 54466853 | 54467065 | KD2-H4K8ac_peak_30012 | 9.15329  | TSR2_ENSG00000158526                                      |
| X | 54521906 | 54522521 | KD2-H4K8ac_peak_30013 | 6.00226  | FGD1_ENSG00000102302                                      |
| X | 55026826 | 55027022 | KD2-H4K8ac_peak_30014 | 5.57044  | APEX2_ENSG00000169188                                     |
| X | 55187784 | 55188193 | KD2-H4K8ac_peak_30015 | 11.3394  | FAM104B_ENSG00000182518                                   |
| X | 55516183 | 55516552 | KD2-H4K8ac_peak_30016 | 6.07178  | USP51_ENSG00000247746                                     |
| X | 55743513 | 55743767 | KD2-H4K8ac_peak_30017 | 8.1233   | RRAGB_ENSG00000083750                                     |
| X | 57021690 | 57021922 | KD2-H4K8ac_peak_30018 | 8.17902  | SPIN3_ENSG00000204271                                     |
| X | 57618592 | 57618934 | KD2-H4K8ac_peak_30019 | 9.15329  | ZXDB_ENSG00000198455                                      |
| X | 57936162 | 57936699 | KD2-H4K8ac_peak_30020 | 9.59147  | ZXDA_ENSG00000198205                                      |
| X | 63424786 | 63425186 | KD2-H4K8ac_peak_30021 | 7.51935  | AMER1_ENSG00000184675                                     |
| X | 64755060 | 64755418 | KD2-H4K8ac_peak_30022 | 13.36684 | LAS1L_ENSG00000001497                                     |
| X | 67718355 | 67719131 | KD2-H4K8ac_peak_30023 | 16.54162 | YIPF6_ENSG00000181704                                     |
| X | 68114332 | 68114683 | KD2-H4K8ac_peak_30024 | 8.26945  |                                                           |
| X | 68356348 | 68356545 | KD2-H4K8ac_peak_30025 | 5.52329  |                                                           |
| X | 68357023 | 68357256 | KD2-H4K8ac_peak_30026 | 5.40638  |                                                           |
| X | 68384896 | 68385209 | KD2-H4K8ac_peak_30027 | 5.54647  | PJA1_ENSG00000181191                                      |
| X | 69653959 | 69654247 | KD2-H4K8ac_peak_30028 | 9.08816  |                                                           |
| X | 69664072 | 69664562 | KD2-H4K8ac_peak_30029 | 4.06758  | DLG3_ENSG00000082458                                      |
| X | 70287726 | 70288117 | KD2-H4K8ac_peak_30030 | 8.1233   | SNX12_ENSG00000147164                                     |
| X | 70315032 | 70315398 | KD2-H4K8ac_peak_30031 | 6.64891  | FOXO4_ENSG00000184481                                     |
| X | 70322895 | 70323248 | KD2-H4K8ac_peak_30032 | 5.835    |                                                           |
| X | 70338450 | 70338717 | KD2-H4K8ac_peak_30033 | 11.05407 | MED12_ENSG00000184634                                     |
| X | 70503583 | 70503918 | KD2-H4K8ac_peak_30034 | 10.96455 | NONO_ENSG00000147140                                      |
| X | 70753126 | 70753362 | KD2-H4K8ac_peak_30035 | 7.59643  | OGT_ENSG00000147162                                       |
| X | 71238234 | 71238499 | KD2-H4K8ac_peak_30036 | 6.25869  |                                                           |

|   |           |          |                       |          |                                                       |
|---|-----------|----------|-----------------------|----------|-------------------------------------------------------|
| X | 71262032  | 71262409 | KD2-H4K8ac_peak_30037 | 8.86391  |                                                       |
| X | 71265751  | 71266181 | KD2-H4K8ac_peak_30038 | 5.29555  |                                                       |
| X | 71267161  | 71267722 | KD2-H4K8ac_peak_30039 | 7.167    |                                                       |
| X | 71289576  | 71289918 | KD2-H4K8ac_peak_30040 | 8.37231  |                                                       |
| X | 71294251  | 71294468 | KD2-H4K8ac_peak_30041 | 5.52329  |                                                       |
| X | 71301887  | 71302195 | KD2-H4K8ac_peak_30042 | 4.86324  |                                                       |
| X | 71304122  | 71304595 | KD2-H4K8ac_peak_30043 | 6.40683  |                                                       |
| X | 71314439  | 71314753 | KD2-H4K8ac_peak_30044 | 5.04237  |                                                       |
| X | 71315377  | 71315573 | KD2-H4K8ac_peak_30045 | 6.2781   |                                                       |
| X | 71336863  | 71337109 | KD2-H4K8ac_peak_30046 | 8.19585  |                                                       |
| X | 71341279  | 71341530 | KD2-H4K8ac_peak_30047 | 6.99815  |                                                       |
| X | 71342712  | 71342929 | KD2-H4K8ac_peak_30048 | 6.66692  |                                                       |
| X | 71352353  | 71352562 | KD2-H4K8ac_peak_30049 | 6.92624  | RGAG4_ENSG00000242732;RP11-262D11.1_ENSG00000248345   |
| X | 71401666  | 71401877 | KD2-H4K8ac_peak_30050 | 7.67504  | PIN4_ENSG00000102309                                  |
| X | 71459066  | 71459511 | KD2-H4K8ac_peak_30051 | 6.2781   | ERCC6L_ENSG00000186871                                |
| X | 71496700  | 71497028 | KD2-H4K8ac_peak_30052 | 11.05467 | RPS4X_ENSG00000198034                                 |
| X | 71527116  | 71527357 | KD2-H4K8ac_peak_30053 | 5.54647  | CITED1_ENSG00000125931                                |
| X | 71791988  | 71792364 | KD2-H4K8ac_peak_30054 | 10.21502 | HDAC8_ENSG00000147099                                 |
| X | 71792680  | 71792959 | KD2-H4K8ac_peak_30055 | 12.42547 | HDAC8_ENSG00000147099                                 |
| X | 72783132  | 72783589 | KD2-H4K8ac_peak_30056 | 6.99815  | MAP2K4P1_ENSG00000269904;CHIC1_ENSG00000204116        |
| X | 73164214  | 73164422 | KD2-H4K8ac_peak_30057 | 9.31907  | JPX_ENSG00000225470                                   |
| X | 73512948  | 73513240 | KD2-H4K8ac_peak_30058 | 7.22457  | FTX_ENSG00000230590                                   |
| X | 73639723  | 73640573 | KD2-H4K8ac_peak_30059 | 9.65086  | SLC16A2_ENSG00000147100                               |
| X | 74375750  | 74376064 | KD2-H4K8ac_peak_30060 | 13.34404 | ABC7_ENSG00000131269                                  |
| X | 74408468  | 74408845 | KD2-H4K8ac_peak_30061 | 4.20044  |                                                       |
| X | 74742858  | 74743125 | KD2-H4K8ac_peak_30062 | 5.57044  | ZDHHC15_ENSG00000102383                               |
| X | 75393104  | 75393363 | KD2-H4K8ac_peak_30063 | 7.12754  | PBDC1_ENSG00000102390                                 |
| X | 75648662  | 75648956 | KD2-H4K8ac_peak_30064 | 4.9025   | MAGEE1_ENSG00000198934                                |
| X | 77154141  | 77154474 | KD2-H4K8ac_peak_30065 | 12.06346 | COX7B_ENSG00000131174                                 |
| X | 77165695  | 77165998 | KD2-H4K8ac_peak_30066 | 6.16888  | ATP7A_ENSG00000165240;RP5-1000K24.2_ENSG00000248503   |
| X | 77166283  | 77166565 | KD2-H4K8ac_peak_30067 | 6.16888  | ATP7A_ENSG00000165240;RP5-1000K24.2_ENSG00000248503   |
| X | 83074443  | 83074910 | KD2-H4K8ac_peak_30068 | 4.42765  |                                                       |
| X | 83479967  | 83480178 | KD2-H4K8ac_peak_30069 | 9.15329  | MIR548I4_ENSG00000221494                              |
| X | 94163045  | 94163239 | KD2-H4K8ac_peak_30070 | 4.01115  |                                                       |
| X | 100334263 | 1E+08    | KD2-H4K8ac_peak_30071 | 6.07178  | TMEM35_ENSG00000126950                                |
| X | 100645497 | 1.01E+08 | KD2-H4K8ac_peak_30072 | 6.56211  | RPL36A_ENSG00000241343;RPL36A-HNRNPH2_ENSG00000257529 |
| X | 100646045 | 1.01E+08 | KD2-H4K8ac_peak_30073 | 10.73134 | RPL36A_ENSG00000241343;RPL36A-HNRNPH2_ENSG00000257529 |
| X | 100672805 | 1.01E+08 | KD2-H4K8ac_peak_30074 | 11.05467 | ARMCX4_ENSG00000196440                                |
| X | 100805551 | 1.01E+08 | KD2-H4K8ac_peak_30075 | 9.15329  | ARMCX1_ENSG00000126947                                |
| X | 100872571 | 1.01E+08 | KD2-H4K8ac_peak_30076 | 7.22457  | ARMCX6_ENSG00000198960                                |
| X | 100873082 | 1.01E+08 | KD2-H4K8ac_peak_30077 | 6.31143  | ARMCX6_ENSG00000198960                                |
| X | 101380377 | 1.01E+08 | KD2-H4K8ac_peak_30078 | 9.15329  | TCEAL2_ENSG00000184905                                |
| X | 102000348 | 1.02E+08 | KD2-H4K8ac_peak_30079 | 6.8836   |                                                       |
| X | 102024110 | 1.02E+08 | KD2-H4K8ac_peak_30080 | 11.05467 | LINC00630_ENSG00000223546                             |
| X | 102470280 | 1.02E+08 | KD2-H4K8ac_peak_30081 | 8.59579  | BEX4_ENSG00000102409                                  |
| X | 102631029 | 1.03E+08 | KD2-H4K8ac_peak_30082 | 6.16888  | NGFRAP1_ENSG00000166681                               |

|   |           |          |                       |           |                                                    |
|---|-----------|----------|-----------------------|-----------|----------------------------------------------------|
| X | 103217263 | 1.03E+08 | KD2-H4K8ac_peak_30083 | 6.56211   | DPPA3P1_ENSG00000227067                            |
| X | 106361606 | 1.06E+08 | KD2-H4K8ac_peak_30084 | 12.06346  | RBM41_ENSG00000089682                              |
| X | 106959891 | 1.07E+08 | KD2-H4K8ac_peak_30085 | 7.36933   |                                                    |
| X | 109246394 | 1.09E+08 | KD2-H4K8ac_peak_30086 | 7.67504   | TMEM164_ENSG00000157600                            |
| X | 109560934 | 1.1E+08  | KD2-H4K8ac_peak_30087 | 6.64891   |                                                    |
| X | 109561552 | 1.1E+08  | KD2-H4K8ac_peak_30088 | 7.76329   |                                                    |
| X | 110039211 | 1.1E+08  | KD2-H4K8ac_peak_30089 | 5.20908   | CHRD11_ENSG00000101938                             |
| X | 110733069 | 1.11E+08 | KD2-H4K8ac_peak_30090 | 7.12754   |                                                    |
| X | 110923659 | 1.11E+08 | KD2-H4K8ac_peak_30091 | 5.43522   |                                                    |
| X | 110924405 | 1.11E+08 | KD2-H4K8ac_peak_30092 | 11.66477  |                                                    |
| X | 115004514 | 1.15E+08 | KD2-H4K8ac_peak_30093 | 112.94063 |                                                    |
| X | 117250967 | 1.17E+08 | KD2-H4K8ac_peak_30094 | 13.36684  | KLHL13_ENSG0000003096;RP1-169K13.3_ENSG00000239500 |
| X | 117861112 | 1.18E+08 | KD2-H4K8ac_peak_30095 | 9.15329   | IL13RA1_ENSG00000131724                            |
| X | 117861638 | 1.18E+08 | KD2-H4K8ac_peak_30096 | 6.83936   | IL13RA1_ENSG00000131724                            |
| X | 117973266 | 1.18E+08 | KD2-H4K8ac_peak_30097 | 8.1718    | RP4-562J12.2_ENSG00000203650                       |
| X | 118370375 | 1.18E+08 | KD2-H4K8ac_peak_30098 | 5.82799   | PGRMC1_ENSG00000101856                             |
| X | 118699023 | 1.19E+08 | KD2-H4K8ac_peak_30099 | 12.42547  | CXorf56_ENSG00000018610                            |
| X | 118811297 | 1.19E+08 | KD2-H4K8ac_peak_30100 | 4.24345   |                                                    |
| X | 118820282 | 1.19E+08 | KD2-H4K8ac_peak_30101 | 5.51783   |                                                    |
| X | 118986732 | 1.19E+08 | KD2-H4K8ac_peak_30102 | 10.19949  | UPF3B_ENSG00000125351                              |
| X | 119077063 | 1.19E+08 | KD2-H4K8ac_peak_30103 | 7.07117   | NKAP_ENSG00000101882                               |
| X | 119602794 | 1.2E+08  | KD2-H4K8ac_peak_30104 | 4.42765   | LAMP2_ENSG00000005893                              |
| X | 119694736 | 1.2E+08  | KD2-H4K8ac_peak_30105 | 13.81781  |                                                    |
| X | 119736833 | 1.2E+08  | KD2-H4K8ac_peak_30106 | 8.17902   |                                                    |
| X | 119737938 | 1.2E+08  | KD2-H4K8ac_peak_30107 | 9.15329   |                                                    |
| X | 119763635 | 1.2E+08  | KD2-H4K8ac_peak_30108 | 6.25869   | C1GALT1C1_ENSG00000171155                          |
| X | 122993907 | 1.23E+08 | KD2-H4K8ac_peak_30109 | 5.25071   | XIAP_ENSG00000101966                               |
| X | 123093304 | 1.23E+08 | KD2-H4K8ac_peak_30110 | 10.21502  | STAG2_ENSG00000101972                              |
| X | 128656985 | 1.29E+08 | KD2-H4K8ac_peak_30111 | 5.43522   | SMARCA1_ENSG00000102038                            |
| X | 128738355 | 1.29E+08 | KD2-H4K8ac_peak_30112 | 7.13615   |                                                    |
| X | 129039624 | 1.29E+08 | KD2-H4K8ac_peak_30113 | 21.10246  | UTP14A_ENSG00000156697                             |
| X | 129065725 | 1.29E+08 | KD2-H4K8ac_peak_30114 | 13.57066  |                                                    |
| X | 129091371 | 1.29E+08 | KD2-H4K8ac_peak_30115 | 12.42761  | RP4-537K23.4_ENSG00000235189                       |
| X | 129114957 | 1.29E+08 | KD2-H4K8ac_peak_30116 | 5.57044   | BCORL1_ENSG00000085185                             |
| X | 129245108 | 1.29E+08 | KD2-H4K8ac_peak_30117 | 6.54442   | ELF4_ENSG00000102034                               |
| X | 129299403 | 1.29E+08 | KD2-H4K8ac_peak_30118 | 15.59774  | AIFM1_ENSG00000156709                              |
| X | 129305364 | 1.29E+08 | KD2-H4K8ac_peak_30119 | 6.99815   | RAB33A_ENSG00000134594                             |
| X | 130036962 | 1.3E+08  | KD2-H4K8ac_peak_30120 | 7.95563   | ENOX2_ENSG00000165675                              |
| X | 130862969 | 1.31E+08 | KD2-H4K8ac_peak_30121 | 4.06758   |                                                    |
| X | 130880717 | 1.31E+08 | KD2-H4K8ac_peak_30122 | 12.06346  |                                                    |
| X | 131157351 | 1.31E+08 | KD2-H4K8ac_peak_30123 | 7.47462   | MST4_ENSG00000134602                               |
| X | 131351567 | 1.31E+08 | KD2-H4K8ac_peak_30124 | 8.1233    | RAP2C-AS1_ENSG00000232160                          |
| X | 131623328 | 1.32E+08 | KD2-H4K8ac_peak_30125 | 3.97079   | MBNL3_ENSG00000076770                              |
| X | 132090460 | 1.32E+08 | KD2-H4K8ac_peak_30126 | 8.23062   |                                                    |
| X | 132117011 | 1.32E+08 | KD2-H4K8ac_peak_30127 | 9.11031   |                                                    |
| X | 132119366 | 1.32E+08 | KD2-H4K8ac_peak_30128 | 3.90565   |                                                    |

|   |           |          |                       |          |                                                    |
|---|-----------|----------|-----------------------|----------|----------------------------------------------------|
| X | 133594247 | 1.34E+08 | KD2-H4K8ac_peak_30129 | 11.1952  | HPRT1_ENSG00000165704                              |
| X | 133678510 | 1.34E+08 | KD2-H4K8ac_peak_30130 | 6.66692  |                                                    |
| X | 134185756 | 1.34E+08 | KD2-H4K8ac_peak_30131 | 4.68059  | FAM127B_ENSG00000203950                            |
| X | 135333092 | 1.35E+08 | KD2-H4K8ac_peak_30132 | 6.25869  |                                                    |
| X | 135962357 | 1.36E+08 | KD2-H4K8ac_peak_30133 | 5.57044  | RBMX_ENSG00000147274;SNORD61_ENSG00000206979       |
| X | 139014523 | 1.39E+08 | KD2-H4K8ac_peak_30134 | 4.37708  |                                                    |
| X | 148586623 | 1.49E+08 | KD2-H4K8ac_peak_30135 | 3.80759  |                                                    |
| X | 149106222 | 1.49E+08 | KD2-H4K8ac_peak_30136 | 7.22457  | CXorf40B_ENSG00000197021;LINC00894_ENSG00000235703 |
| X | 149438050 | 1.49E+08 | KD2-H4K8ac_peak_30137 | 7.01964  |                                                    |
| X | 150565765 | 1.51E+08 | KD2-H4K8ac_peak_30138 | 10.86378 | VMA21_ENSG00000160131                              |
| X | 152110390 | 1.52E+08 | KD2-H4K8ac_peak_30139 | 11.2938  |                                                    |
| X | 152126975 | 1.52E+08 | KD2-H4K8ac_peak_30140 | 9.73431  |                                                    |
| X | 152676547 | 1.53E+08 | KD2-H4K8ac_peak_30141 | 9.51625  |                                                    |
| X | 152741437 | 1.53E+08 | KD2-H4K8ac_peak_30142 | 6.66692  |                                                    |
| X | 152742872 | 1.53E+08 | KD2-H4K8ac_peak_30143 | 11.60101 |                                                    |
| X | 152757240 | 1.53E+08 | KD2-H4K8ac_peak_30144 | 7.47462  |                                                    |
| X | 152765255 | 1.53E+08 | KD2-H4K8ac_peak_30145 | 4.12757  |                                                    |
| X | 152790849 | 1.53E+08 | KD2-H4K8ac_peak_30146 | 10.08707 |                                                    |
| X | 152802298 | 1.53E+08 | KD2-H4K8ac_peak_30147 | 9.11031  |                                                    |
| X | 152803530 | 1.53E+08 | KD2-H4K8ac_peak_30148 | 7.40314  |                                                    |
| X | 152804238 | 1.53E+08 | KD2-H4K8ac_peak_30149 | 4.86324  |                                                    |
| X | 152909359 | 1.53E+08 | KD2-H4K8ac_peak_30150 | 5.02756  |                                                    |
| X | 152933123 | 1.53E+08 | KD2-H4K8ac_peak_30151 | 7.40314  |                                                    |
| X | 152950569 | 1.53E+08 | KD2-H4K8ac_peak_30152 | 7.27716  |                                                    |
| X | 152954117 | 1.53E+08 | KD2-H4K8ac_peak_30153 | 6.4095   | PNCK_ENSG00000130822;SLC6A8_ENSG00000130821        |
| X | 153009499 | 1.53E+08 | KD2-H4K8ac_peak_30154 | 8.83749  |                                                    |
| X | 153031517 | 1.53E+08 | KD2-H4K8ac_peak_30155 | 6.36375  | U52111.14_ENSG00000232725                          |
| X | 153048873 | 1.53E+08 | KD2-H4K8ac_peak_30156 | 5.75452  |                                                    |
| X | 153084455 | 1.53E+08 | KD2-H4K8ac_peak_30157 | 6.25869  |                                                    |
| X | 153186621 | 1.53E+08 | KD2-H4K8ac_peak_30158 | 4.66652  |                                                    |
| X | 153187275 | 1.53E+08 | KD2-H4K8ac_peak_30159 | 7.47462  |                                                    |
| X | 153192025 | 1.53E+08 | KD2-H4K8ac_peak_30160 | 8.30974  |                                                    |
| X | 153192984 | 1.53E+08 | KD2-H4K8ac_peak_30161 | 13.35993 |                                                    |
| X | 153200089 | 1.53E+08 | KD2-H4K8ac_peak_30162 | 7.76329  | ARHGAP4_ENSG00000089820;NAA10_ENSG00000102030      |
| X | 153200833 | 1.53E+08 | KD2-H4K8ac_peak_30163 | 6.36375  | ARHGAP4_ENSG00000089820;NAA10_ENSG00000102030      |
| X | 153209797 | 1.53E+08 | KD2-H4K8ac_peak_30164 | 5.30799  | RENBP_ENSG00000102032                              |
| X | 153236793 | 1.53E+08 | KD2-H4K8ac_peak_30165 | 14.07846 | HCFC1_ENSG00000172534;TMEM187_ENSG00000177854      |
| X | 153238806 | 1.53E+08 | KD2-H4K8ac_peak_30166 | 9.09777  |                                                    |
| X | 153267919 | 1.53E+08 | KD2-H4K8ac_peak_30167 | 7.47462  |                                                    |
| X | 153284686 | 1.53E+08 | KD2-H4K8ac_peak_30168 | 11.50346 | IRAK1_ENSG00000184216;MIR718_ENSG00000211524       |
| X | 153285135 | 1.53E+08 | KD2-H4K8ac_peak_30169 | 10.46264 | IRAK1_ENSG00000184216;MIR718_ENSG00000211524       |
| X | 153570077 | 1.54E+08 | KD2-H4K8ac_peak_30170 | 12.42547 |                                                    |
| X | 153598249 | 1.54E+08 | KD2-H4K8ac_peak_30171 | 9.02371  |                                                    |
| X | 153598750 | 1.54E+08 | KD2-H4K8ac_peak_30172 | 5.73839  |                                                    |
| X | 153600026 | 1.54E+08 | KD2-H4K8ac_peak_30173 | 5.57044  |                                                    |
| X | 153602452 | 1.54E+08 | KD2-H4K8ac_peak_30174 | 6.8836   | FLNA_ENSG00000196924                               |

|   |           |          |                       |          |                                              |
|---|-----------|----------|-----------------------|----------|----------------------------------------------|
| X | 153606406 | 1.54E+08 | KD2-H4K8ac_peak_30175 | 7.76329  | EMD_ENSG00000102119                          |
| X | 153625599 | 1.54E+08 | KD2-H4K8ac_peak_30176 | 9.98013  |                                              |
| X | 153640006 | 1.54E+08 | KD2-H4K8ac_peak_30177 | 5.71749  | DNASE1L1_ENSG00000013563;TAZ_ENSG00000102125 |
| X | 153665358 | 1.54E+08 | KD2-H4K8ac_peak_30178 | 7.29264  | GDI1_ENSG00000203879                         |
| X | 153714401 | 1.54E+08 | KD2-H4K8ac_peak_30179 | 12.2118  | UBL4A_ENSG00000102178                        |
| X | 153715259 | 1.54E+08 | KD2-H4K8ac_peak_30180 | 10.05081 | UBL4A_ENSG00000102178                        |
| X | 153744187 | 1.54E+08 | KD2-H4K8ac_peak_30181 | 5.88845  | FAM3A_ENSG00000071889                        |
| X | 153775607 | 1.54E+08 | KD2-H4K8ac_peak_30182 | 5.92591  | G6PD_ENSG00000160211                         |
| X | 154255403 | 1.54E+08 | KD2-H4K8ac_peak_30183 | 12.25733 | F8_ENSG00000185010                           |
| X | 154299107 | 1.54E+08 | KD2-H4K8ac_peak_30184 | 6.07178  | CMC4_ENSG00000182712;BRCC3_ENSG00000185515   |
| X | 154299834 | 1.54E+08 | KD2-H4K8ac_peak_30185 | 6.16888  | CMC4_ENSG00000182712;BRCC3_ENSG00000185515   |
| X | 154444801 | 1.54E+08 | KD2-H4K8ac_peak_30186 | 3.97079  |                                              |
| X | 154841966 | 1.55E+08 | KD2-H4K8ac_peak_30187 | 10.19949 |                                              |
| X | 155111063 | 1.55E+08 | KD2-H4K8ac_peak_30188 | 9.11031  | VAMP7_ENSG00000124333                        |
| Y | 21154743  | 21155015 | KD2-H4K8ac_peak_30189 | 23.52296 | CD24P4_ENSG00000185275                       |













































































































































































































































































































































































































































































































































































































































































































































































PA-AS1\_ENSG00000178863































































































































































































































































































































































































































































































































































































































































































11-23J9.6\_ENSG00000254483
